# Supplementary material for: A Fault Diagnosis Method for One‐Dimensional Vibration Signal Based on Multiresolution tlsDMD and Approximate Entropy
Source: Hindawi journal article supplement (doi:10.1155/2019/3262818), 2019-01-01
Supplement: f1 [file 3262818.f1.zip › 3262818.f1/gear signals/pitch errors signal/Data11.txt]

1440   208    
-1520  368    
1392   176    
-128   48     
-912   112    
912    -144   
-368   -304   
-64    48     
176    192    
48     64     
-16    48     
-176   0      
48     128    
208    80     
0      256    
-320   -32    
-112   -32    
144    272    
-80    48     
16     -32    
-720   176    
576    32     
0      -48    
-112   -480   
-528   -656   
-64    464    
352    -128   
-560   -80    
320    80     
128    80     
16     256    
-176   0      
400    -112   
-432   48     
-96    48     
-208   -496   
-464   128    
272    -96    
-224   -128   
304    112    
48     192    
-128   -32    
-288   16     
400    -80    
0      -48    
128    224    
-288   -96    
912    1504   
-2160  3536   
832    1488   
-192   -608   
-1072  -464   
1072   224    
288    -128   
-576   384    
0      -144   
448    512    
400    -144   
-544   96     
160    -128   
-48    208    
-128   -112   
48     256    
144    112    
-384   64     
448    32     
384    512    
-688   1120   
256    432    
224    -32    
-224   -272   
256    256    
-48    -128   
-320   208    
752    272    
-544   320    
-112   304    
320    272    
-272   96     
208    112    
48     -96    
176    -128   
-416   80     
352    48     
-16    -32    
48     144    
48     16     
-432   -48    
400    48     
-304   -608   
96     -816   
-112   -464   
-256   272    
48     1344   
496    368    
-128   -384   
-192   -16    
128    -208   
-16    -160   
-144   -752   
16     -32    
80     480    
-64    528    
304    304    
112    272    
336    -176   
-592   0      
-96    -192   
448    -144   
-80    -176   
-64    -48    
128    528    
-368   480    
352    -272   
272    224    
-336   -112   
-240   -32    
176    -384   
240    272    
0      288    
-176   96     
-32    80     
32     -592   
160    -224   
-192   -160   
80     480    
-144   -304   
176    368    
176    0      
-640   1504   
656    -592   
32     48     
-608   1200   
464    336    
352    -240   
-352   -208   
-352   64     
416    -1072  
32     -480   
96     -272   
-80    -160   
80     176    
48     144    
144    -320   
-224   0      
-48    -256   
192    -64    
128    -144   
-16    -160   
-448   -48    
208    -288   
-256   -128   
208    -800   
480    -64    
32     -240   
-288   160    
-32    416    
64     128    
96     -192   
16     64     
-224   384    
32     192    
-192   -160   
240    -480   
128    -80    
-400   -272   
-48    160    
480    96     
-192   128    
-48    -2720  
-176   -32    
144    -2400  
320    80     
160    80     
-656   272    
192    16     
48     -32    
-16    112    
-96    -48    
-1168  1776   
1808   -464   
-144   304    
-32    -128   
112    752    
176    112    
-48    -64    
-288   128    
-48    0      
32     336    
112    608    
-224   -592   
160    176    
32     32     
-48    480    
-32    -416   
256    -48    
192    -768   
-336   752    
80     144    
-96    -544   
1232   -272   
-1408  560    
832    400    
-448   608    
-128   352    
224    -624   
528    -2144  
-368   -1392  
-368   -368   
272    1136   
0      352    
-32    432    
576    48     
-16    -16    
-48    -304   
-224   -144   
512    -128   
160    176    
-192   -208   
-48    -752   
-16    80     
64     -640   
176    -192   
-80    560    
-304   784    
176    960    
-144   48     
368    -864   
-304   -160   
64     -960   
384    -528   
-208   -112   
-192   112    
384    304    
-416   -432   
-16    -224   
-112   1856   
704    -624   
-240   -304   
-80    -624   
400    176    
-64    -2016  
464    -720   
-304   -96    
592    -96    
-288   320    
-80    -80    
64     -32    
192    304    
1216   2784   
-976   1520   
176    -368   
480    -208   
-144   848    
-336   -144   
-144   800    
1376   -1552  
-256   -320   
-1104  -1008  
272    224    
624    -112   
192    -80    
-544   -112   
-192   304    
224    32     
112    -16    
-192   -112   
-688   -800   
256    -288   
352    512    
160    192    
-32    -560   
-784   -112   
576    -112   
32     160    
-48    -80    
192    304    
-288   -224   
80     544    
400    496    
16     752    
48     -32    
-352   -80    
-1008  16     
384    -192   
112    -96    
-128   -112   
304    -32    
-16    -320   
96     -128   
-160   -352   
192    -208   
96     -224   
-336   -112   
336    16     
192    960    
160    176    
160    -336   
-368   -368   
0      -272   
256    624    
-80    96     
-640   -160   
224    -896   
-48    0      
16     -1552  
208    304    
-208   112    
112    32     
-80    -192   
64     -384   
-288   -144   
80     128    
64     -48    
-48    96     
96     96     
80     -224   
-160   -16    
128    320    
560    -64    
-528   -160   
112    96     
-16    -16    
208    -16    
128    704    
-448   -288   
64     -80    
288    176    
-16    -288   
-352   -288   
-608   -2608  
-624   112    
1424   32     
-912   -144   
496    144    
304    -64    
-512   64     
-640   -80    
160    16     
144    -16    
-64    0      
-208   112    
80     144    
-128   -272   
160    -352   
-848   -192   
-224   112    
176    48     
-16    -256   
48     -16    
-304   -1184  
592    -448   
-816   272    
272    -32    
-48    96     
-256   112    
112    224    
96     160    
-16    -336   
-224   16     
-272   80     
-192   32     
288    112    
-1008  -96    
-272   16     
-912   -112   
0      256    
-96    96     
-144   -48    
-176   0      
192    -64    
-80    96     
176    64     
-64    80     
-208   96     
576    112    
-720   -192   
400    160    
-128   -112   
-256   128    
-32    1952   
832    864    
-1424  560    
-272   -224   
480    144    
-944   -208   
-400   144    
704    208    
-320   16     
-464   -208   
304    64     
-400   -400   
-80    128    
16     -144   
-192   -16    
336    160    
-240   16     
-256   -48    
272    64     
-304   0      
-48    160    
560    832    
-1712  -272   
-496   -16    
896    224    
-896   -112   
-16    144    
416    224    
-192   -128   
-512   16     
240    80     
240    -96    
-336   112    
-176   80     
480    80     
-512   32     
80     32     
-208   -208   
48     -32    
-16    -112   
-192   128    
16     -16    
-384   -496   
-144   -112   
464    48     
-352   -80    
16     16     
176    256    
-464   304    
448    -448   
-208   352    
-128   128    
-464   -144   
-80    96     
-208   0      
-144   496    
-352   -208   
-160   48     
544    -16    
112    288    
320    -64    
-448   144    
128    160    
0      32     
-32    -32    
64     176    
32     -64    
-272   128    
416    -16    
-304   -80    
-32    -560   
1472   -2144  
80     288    
-720   64     
-960   96     
48     144    
1024   0      
-528   256    
-192   0      
304    80     
-448   176    
368    96     
-64    -80    
0      192    
-448   -272   
320    496    
-912   -160   
-96    288    
96     -112   
-96    -576   
-256   -688   
0      -16    
288    112    
-672   112    
32     32     
176    32     
-480   144    
176    -48    
-368   -160   
-160   -832   
384    -224   
-496   448    
-48    496    
-80    208    
48     -544   
256    -80    
-16    368    
-496   336    
-416   -688   
448    -800   
-80    -528   
-304   -288   
-16    -96    
320    192    
-32    80     
80     96     
0      272    
-16    -208   
80     592    
-16    448    
144    -336   
-128   16     
-16    528    
640    -144   
-544   -96    
304    288    
-96    32     
-480   -1824  
-128   -560   
80     1216   
-96    144    
176    -48    
0      -144   
16     144    
-208   -32    
288    -208   
64     416    
-112   432    
-320   288    
-80    -80    
-64    560    
96     -32    
16     -112   
-16    80     
-288   -32    
256    240    
16     32     
48     32     
48     240    
-160   448    
0      -48    
416    0      
304    -80    
-1040  224    
416    80     
16     96     
-48    176    
32     -80    
-144   208    
-128   128    
272    -16    
112    80     
-112   32     
16     144    
-32    112    
-48    80     
112    -32    
-352   224    
176    -128   
-80    -48    
16     -64    
-80    256    
48     816    
624    -240   
-800   64     
288    -128   
-16    0      
96     336    
144    512    
-96    320    
-304   96     
-48    -48    
320    -16    
-96    -160   
-80    256    
288    16     
-320   48     
112    80     
192    336    
-176   656    
128    -64    
16     48     
-176   352    
112    256    
32     208    
-240   -80    
32     288    
80     272    
-32    -176   
-288   -240   
464    -192   
-48    96     
-48    880    
2656   -1472  
-1568  384    
176    416    
240    240    
160    320    
-480   -160   
-128   528    
160    -80    
-192   -240   
288    384    
16     0      
-224   304    
176    -128   
208    -112   
-288   -16    
32     -736   
-80    96     
304    -2080  
-48    -256   
464    624    
-1632  944    
464    -352   
320    -864   
-800   -816   
608    -464   
-208   -208   
96     -800   
-864   -752   
560    -112   
-144   80     
-80    80     
176    352    
-16    -704   
80     -288   
-96    96     
-96    -304   
496    -544   
-144   80     
-160   -576   
-240   -240   
80     48     
48     112    
-496   112    
400    -560   
-32    800    
-336   304    
-288   368    
160    -144   
-304   -160   
240    -528   
-208   -16    
-176   -128   
0      16     
-288   -288   
288    64     
80     80     
-272   -224   
640    384    
-320   -48    
-480   128    
400    -176   
-80    -336   
528    -576   
-352   176    
368    -240   
448    32     
-16    -16    
160    816    
-704   624    
-448   -2352  
-864   -464   
-96    -192   
352    160    
928    -160   
-640   288    
-16    -112   
-544   528    
704    176    
-400   112    
48     -640   
-112   -32    
-112   -112   
576    96     
-112   -112   
-240   112    
48     112    
-160   96     
992    928    
-720   640    
-96    -368   
384    -384   
-256   32     
0      16     
80     64     
-320   272    
320    96     
-432   32     
208    0      
-32    336    
-80    80     
-16    128    
112    -560   
48     -544   
48     -80    
16     -80    
160    -480   
128    -80    
0      -368   
288    224    
-160   -48    
-16    16     
288    -192   
-48    256    
128    496    
-112   -304   
-176   -32    
448    -96    
0      576    
-208   176    
176    320    
208    -160   
144    -320   
-352   -32    
160    -96    
-48    -80    
-96    -32    
-32    -80    
256    -2608  
144    0      
16     -608   
-80    -336   
-48    112    
176    -480   
-48    -32    
32     -320   
256    320    
-160   416    
-192   -128   
544    -112   
-96    16     
-48    -544   
288    112    
-112   0      
-16    96     
144    -368   
-80    -304   
-608   480    
160    -752   
-80    -352   
-64    128    
400    1664   
2256   -592   
-1504  304    
-208   -48    
576    -480   
-80    -304   
-336   -32    
336    320    
-240   -32    
-80    -48    
272    -80    
-480   -48    
-64    -80    
128    -352   
112    128    
160    320    
-176   -752   
144    -176   
-64    -160   
32     16     
256    -592   
-1168  576    
736    -144   
224    -80    
-768   -272   
192    128    
112    0      
-176   -256   
64     176    
320    -192   
-368   -16    
-32    -560   
16     0      
208    -752   
-192   160    
480    352    
-384   144    
128    96     
-64    -240   
-176   80     
160    0      
-240   -48    
-240   96     
-928   -48    
-80    -320   
-176   -112   
80     -128   
32     80     
64     -112   
-432   -896   
1296   -3712  
-1216  -256   
512    -400   
416    -80    
-32    208    
-592   -128   
272    336    
64     -208   
-960   -320   
80     0      
-496   128    
192    16     
48     64     
-16    -768   
-576   -16    
656    -1632  
-288   -32    
288    208    
384    16     
-192   144    
96     0      
-672   -336   
864    -368   
128    -400   
-992   -464   
416    144    
240    -16    
-192   -48    
-416   -592   
432    64     
192    -96    
-96    64     
112    64     
-144   -112   
-448   -192   
176    -64    
112    32     
-160   0      
-64    224    
128    -224   
-272   -16    
48     -304   
176    496    
1088   -656   
-1248  400    
496    -528   
0      0      
-320   -368   
416    320    
-256   -16    
-336   64     
352    80     
256    -16    
-80    32     
-352   272    
-48    336    
320    400    
-240   -32    
-128   -224   
-16    48     
192    -224   
192    -304   
368    -80    
-464   192    
128    64     
208    64     
-112   -240   
-288   96     
128    0      
64     928    
1168   2480   
-1440  320    
288    -144   
880    -752   
-1040  -16    
-336   0      
48     -352   
720    -1344  
-336   0      
-208   -272   
-112   48     
-16    80     
64     160    
128    -288   
-208   -96    
32     224    
-400   -288   
240    -160   
-592   -96    
256    880    
80     688    
-224   128    
112    -288   
-336   640    
-400   688    
-80    112    
528    560    
144    880    
-352   704    
-192   -1040  
288    256    
128    -176   
-192   48     
-64    -384   
-192   -224   
208    -64    
48     128    
-448   -96    
-176   672    
32     -96    
-560   -320   
384    -144   
-64    -176   
-176   -112   
160    928    
-128   960    
320    -64    
48     128    
-176   -608   
80     -144   
-32    144    
80     -336   
288    32     
-960   -32    
672    -448   
-576   -768   
112    336    
-416   -432   
64     0      
112    16     
-256   176    
-48    0      
224    -32    
-320   -208   
416    -592   
400    16     
-304   304    
80     0      
-240   160    
-368   208    
-48    192    
-80    -32    
-32    -48    
-192   128    
-336   -16    
112    48     
-368   -64    
16     464    
80     208    
-144   -144   
80     48     
608    1088   
-1104  624    
448    -304   
144    224    
-208   16     
96     32     
-464   16     
208    -272   
-416   -32    
-128   256    
-208   112    
0      -96    
64     -176   
224    -96    
-384   64     
0      96     
112    -48    
-16    -224   
80     48     
-240   224    
608    240    
-1184  496    
688    -208   
-96    -64    
-192   16     
-1008  -80    
384    -32    
-128   32     
-160   240    
32     352    
-48    48     
128    0      
-224   192    
112    176    
48     96     
-32    288    
-160   32     
352    480    
-304   416    
-160   -368   
240    -272   
-224   208    
-160   0      
-32    224    
352    -32    
32     -112   
-176   224    
192    -112   
144    -144   
-512   64     
-48    -1376  
-1632  -208   
1312   -64    
-992   80     
-32    -208   
432    384    
-560   -240   
-64    272    
288    800    
400    688    
-464   208    
-64    112    
0      -128   
448    368    
-272   -128   
-224   256    
-64    -368   
448    576    
-336   -144   
-160   384    
192    0      
-784   304    
2096   -240   
-944   -624   
1200   272    
-224   -256   
32     -1152  
16     48     
-352   592    
16     208    
192    96     
16     -48    
-48    160    
-48    -352   
-336   -80    
304    160    
48     48     
-128   0      
-128   160    
-48    -128   
304    -96    
240    208    
-304   -432   
-336   400    
832    -208   
-320   96     
288    400    
-32    16     
-528   -64    
-192   240    
224    -144   
368    -192   
-80    192    
160    304    
-512   112    
-176   0      
512    576    
448    -192   
352    288    
368    224    
-112   0      
-112   112    
64     64     
-64    32     
-176   96     
320    48     
-432   112    
-176   128    
112    128    
112    -352   
-528   -3008  
976    -2544  
-128   96     
672    48     
-448   176    
-464   336    
416    -16    
176    112    
208    -224   
-592   -16    
304    -96    
-112   256    
-128   80     
352    272    
-96    -32    
-48    272    
192    32     
-192   0      
128    80     
-432   224    
704    432    
-848   384    
80     -944   
624    208    
608    -48    
-992   -32    
320    720    
352    96     
-192   304    
-48    -80    
-176   160    
112    144    
160    176    
-528   -144   
560    48     
-224   32     
144    368    
-256   -480   
-304   272    
896    -2048  
-448   176    
240    112    
-352   0      
-64    32     
576    64     
-320   112    
288    64     
-176   -64    
304    32     
288    304    
-320   80     
-64    256    
80     -1072  
-848   96     
704    -288   
-896   64     
448    -64    
448    -80    
-208   112    
-16    144    
32     -128   
288    64     
-96    -48    
-112   0      
-16    176    
208    144    
-208   32     
48     -416   
-208   -32    
64     -176   
608    32     
-352   -2432  
-16    144    
160    112    
112    32     
-160   -144   
-48    176    
112    -288   
48     -592   
-128   -256   
0      304    
-464   -832   
1056   -1520  
-992   432    
672    -240   
-224   176    
-448   -608   
448    928    
720    48     
-464   -960   
-160   192    
272    288    
176    -112   
128    352    
-160   0      
0      -288   
160    384    
192    176    
96     -128   
-352   112    
64     160    
288    -448   
-368   -240   
688    -912   
-448   336    
-448   96     
544    144    
64     80     
-272   -16    
224    -256   
-64    304    
0      32     
160    -320   
112    64     
-304   0      
384    80     
-208   -720   
-80    96     
224    -160   
-240   -272   
176    -144   
-32    176    
-96    -48    
-48    -64    
304    16     
-144   -96    
208    -32    
-272   -128   
256    -32    
-48    16     
-32    48     
-912   -1984  
2256   -128   
16     32     
-1504  32     
1152   -240   
192    -864   
-432   -912   
256    368    
496    -784   
-352   96     
-112   -192   
304    -128   
48     64     
-16    -48    
80     -128   
-448   -112   
640    -400   
-288   48     
112    -192   
-336   -416   
48     -496   
128    -528   
-400   432    
2064   -1088  
-1184  -64    
-288   -3408  
96     -944   
272    16     
0      -176   
64     -560   
-128   -48    
144    -352   
400    432    
-336   -176   
-288   -64    
64     -272   
16     -32    
-592   0      
-480   -416   
256    -160   
64     -48    
-112   208    
256    64     
-144   -240   
416    -1456  
144    464    
-48    -304   
-336   816    
-928   544    
368    -320   
-480   -320   
160    -320   
-48    64     
32     -16    
160    -64    
-176   -688   
-576   -288   
176    -720   
592    464    
-384   -736   
-160   -176   
640    -240   
-240   112    
0      96     
16     448    
-224   -96    
304    208    
-704   176    
-64    -48    
-144   112    
304    -288   
-208   -96    
384    848    
912    144    
-1424  -608   
-32    304    
1088   -128   
-192   176    
-752   896    
432    1824   
-352   208    
-80    -128   
336    144    
-368   -48    
0      -128   
-192   -544   
480    -256   
64     368    
-528   -304   
272    -144   
32     160    
-64    -944   
176    368    
-32    128    
-16    -352   
-128   352    
432    80     
-80    992    
224    320    
-640   160    
176    -656   
-64    208    
-48    -208   
-288   -96    
48     -272   
128    944    
544    -208   
-48    224    
-272   -176   
352    -256   
-208   -464   
0      608    
-496   -80    
-192   288    
80     -224   
112    320    
-256   384    
-176   -432   
176    -128   
-464   -1056  
320    464    
96     -640   
-560   -912   
896    -448   
-512   544    
-592   -48    
160    736    
-512   -144   
-192   -1376  
-208   48     
608    1120   
-224   64     
64     -576   
-112   320    
304    -432   
112    -176   
-80    -512   
-224   112    
-304   80     
320    -16    
-16    160    
16     -16    
160    -16    
-48    112    
16     16     
-16    -208   
-272   176    
-176   64     
-80    352    
-352   416    
-96    64     
-480   -560   
-1328  -32    
-592   96     
624    -368   
-832   160    
464    -320   
48     -432   
320    -560   
-304   -416   
272    -816   
320    -448   
80     -80    
80     160    
-320   -320   
0      -96    
32     -64    
-32    -144   
-112   256    
-96    432    
-64    112    
-928   32     
-272   -176   
720    -64    
64     -160   
-368   -240   
560    192    
-928   256    
48     -16    
400    272    
-112   -400   
-464   -48    
-80    512    
432    320    
144    -560   
-512   -144   
-208   -128   
320    -384   
-432   896    
-128   -672   
-496   528    
32     -176   
288    96     
240    -144   
16     -32    
-448   -448   
112    0      
256    208    
-240   224    
-16    -96    
-288   64     
-160   -608   
-256   -1456  
1520   -816   
-1472  128    
432    144    
-32    64     
-368   496    
432    0      
-224   256    
176    208    
-112   176    
288    -32    
-480   112    
176    -112   
0      160    
-48    144    
-192   112    
-128   -256   
32     48     
-528   -96    
192    160    
-64    -112   
-32    128    
416    1392   
992    528    
-528   368    
-480   -16    
464    0      
176    128    
-352   224    
800    -128   
-480   48     
-32    128    
416    32     
-256   -64    
-144   192    
144    -144   
-256   80     
272    -96    
-48    -80    
144    352    
-256   144    
-368   16     
112    -512   
-480   160    
-16    -224   
144    320    
64     400    
-128   768    
-1728  432    
-704   0      
1056   -640   
384    32     
-560   192    
-112   208    
240    128    
160    288    
112    -400   
-576   -320   
240    -128   
944    192    
-96    432    
-832   192    
128    112    
480    -112   
-384   224    
-112   -32    
320    592    
496    -128   
-528   80     
256    128    
-448   -1344  
-1936  -3136  
-384   -528   
512    1264   
-64    208    
272    368    
-48    -16    
-576   64     
48     80     
432    448    
-576   -176   
16     64     
240    80     
-368   80     
-160   112    
128    0      
192    -16    
-80    128    
-208   -16    
384    528    
-480   -64    
-16    464    
816    -80    
-736   144    
-624   -192   
-336   -96    
416    160    
-80    192    
128    48     
-80    160    
64     0      
336    80     
-48    64     
48     32     
-208   272    
-160   -288   
-80    224    
544    0      
-624   -128   
864    -80    
-112   -16    
32     176    
16     192    
-112   144    
384    0      
-112   80     
-144   -320   
-608   -608   
480    -112   
128    80     
128    480    
-160   224    
304    1360   
-464   384    
-128   192    
272    -64    
-576   -16    
112    208    
432    32     
48     464    
-272   144    
96     128    
160    -16    
-240   32     
-48    -64    
32     32     
-48    16     
144    -64    
-352   112    
224    224    
-112   176    
48     48     
384    -144   
-160   144    
-352   208    
256    256    
304    240    
-16    64     
-352   320    
16     352    
160    96     
-16    96     
-576   496    
2288   -768   
-1552  32     
-256   -128   
1024   224    
-240   224    
-304   -96    
-176   -816   
256    -208   
16     640    
-128   -128   
80     144    
-176   16     
368    80     
-368   736    
80     -1088  
-288   -80    
176    128    
-176   48     
192    0      
544    464    
-1456  768    
848    -304   
48     -416   
-96    112    
144    192    
-368   336    
224    -352   
32     96     
192    0      
-32    -1472  
-144   240    
64     -32    
224    16     
-112   -80    
-48    176    
112    96     
16     -48    
-32    -144   
-32    48     
48     304    
-128   192    
0      -32    
112    192    
272    160    
-176   -192   
-96    304    
32     -848   
160    96     
-192   -112   
-1280  208    
2416   -176   
-144   -640   
-1712  96     
1440   496    
-32    352    
-64    256    
-16    32     
-448   -80    
272    -32    
16     -80    
80     96     
-64    -608   
144    304    
-304   128    
160    368    
256    -48    
-64    96     
-192   16     
-16    128    
-96    -496   
1072   928    
-192   -16    
-112   -416   
-144   -656   
-224   -528   
160    -304   
-160   -240   
-336   336    
32     -848   
464    -352   
80     -96    
-64    0      
-192   128    
96     272    
-128   48     
192    224    
-192   32     
-112   -240   
176    144    
0      -96    
192    192    
-112   -144   
-176   160    
80     -176   
-160   -192   
160    -608   
1120   416    
256    416    
-32    240    
384    48     
-224   176    
96     -432   
224    464    
-336   288    
-512   -960   
896    -512   
-112   -80    
608    -144   
32     -16    
-128   576    
-64    -112   
256    80     
192    -224   
-176   32     
368    592    
-720   1136   
-96    144    
208    -560   
176    64     
-16    -128   
-1328  -592   
-384   320    
304    128    
-896   -48    
1392   1696   
-240   288    
-656   -64    
384    -192   
224    352    
208    -400   
-256   -304   
64     560    
32     -96    
176    -192   
96     272    
-48    0      
240    -304   
-176   -48    
64     -448   
96     -112   
96     1104   
192    -448   
-896   0      
352    -1168  
368    -2352  
32     -720   
48     -160   
-288   -1264  
-208   -1888  
160    -208   
240    -48    
-112   -144   
-256   448    
128    352    
256    -208   
-256   -576   
48     -976   
272    624    
128    0      
96     -48    
64     -80    
-480   432    
352    -336   
96     -48    
80     784    
-64    -768   
192    -240   
160    1376   
16     -336   
128    48     
-256   -416   
384    304    
384    0      
-320   -272   
160    64     
-752   544    
320    16     
144    256    
144    -256   
-336   -48    
-128   -336   
384    -128   
256    -80    
-496   112    
16     -272   
96     16     
0      352    
112    96     
-1040  192    
-128   16     
-912   -160   
160    -96    
64     32     
0      384    
320    80     
-208   -960   
368    -400   
-96    -1024  
-16    -304   
128    -320   
-176   -784   
1152   -880   
-80    496    
-304   -576   
-112   64     
-528   96     
320    -192   
-528   432    
192    64     
-96    -800   
-64    -224   
192    -240   
192    -304   
0      112    
-272   -384   
240    528    
-112   144    
112    320    
-32    -80    
-144   16     
-80    -128   
704    0      
-560   -288   
-304   -1360  
352    -192   
240    -240   
-32    480    
-16    -432   
-48    128    
288    -176   
-112   -288   
96     96     
224    -16    
-240   512    
-32    160    
32     32     
48     32     
-432   -256   
-176   -48    
0      128    
0      -192   
-64    32     
80     -480   
160    -160   
-16    -2880  
224    -96    
-64    16     
-64    160    
-144   -112   
-144   -48    
704    1728   
-368   752    
-880   368    
912    -192   
-672   -48    
-128   -176   
400    320    
80     -336   
-144   240    
16     -416   
160    64     
-208   0      
-48    -32    
272    208    
-384   -32    
-96    208    
416    -64    
-304   176    
-80    -160   
96     160    
144    -304   
-112   176    
-544   -720   
1456   48     
-176   -256   
-832   208    
752    -32    
-224   16     
32     368    
-176   -112   
-528   -80    
400    0      
-304   0      
48     -208   
-336   -32    
352    -64    
320    112    
-480   0      
-160   240    
208    -144   
-752   144    
-224   0      
-480   -96    
-544   416    
768    -256   
-576   208    
160    144    
304    -416   
-560   -16    
192    -320   
-64    -416   
464    272    
-352   -16    
-192   192    
-16    224    
-656   -368   
64     -176   
80     32     
96     -208   
128    112    
-272   16     
-640   80     
128    144    
336    -144   
80     96     
-640   -368   
-112   288    
560    192    
-208   -96    
-352   48     
1088   -16    
-2000  -3184  
-1584  -944   
1184   272    
96     432    
-496   16     
-1088  -48    
240    176    
16     -48    
160    -272   
-176   -416   
80     304    
-144   0      
128    80     
96     -16    
-96    -16    
96     64     
-240   80     
208    16     
-304   -96    
128    1008   
448    -112   
-752   320    
336    -192   
-720   64     
496    0      
-96    64     
-240   576    
688    16     
-592   240    
-352   -240   
32     144    
176    -48    
-96    128    
352    80     
-720   0      
192    128    
96     -112   
-1296  -144   
96     -160   
-80    -32    
320    96     
-592   -160   
240    -192   
-288   272    
-256   -16    
432    0      
208    -192   
-496   -80    
192    -64    
-128   -176   
-80    -272   
-144   -192   
240    -320   
16     320    
32     -80    
160    -96    
-288   144    
64     64     
272    -208   
-384   -192   
-80    48     
176    16     
80     80     
-144   -160   
-32    -80    
-64    -272   
-80    -304   
-192   -96    
80     384    
80     704    
304    528    
-320   256    
160    -16    
-240   144    
112    144    
144    144    
-48    208    
16     528    
64     272    
-160   16     
-16    -240   
304    -1344  
-2080  1728   
1872   -176   
-832   -416   
352    -672   
48     352    
-464   -176   
-144   -192   
176    -160   
208    -144   
-432   -240   
-32    -240   
208    -48    
64     32     
-304   -528   
96     128    
-96    688    
176    224    
-64    48     
-32    -32    
-272   -416   
272    -1472  
128    -320   
0      336    
240    1072   
0      752    
-192   -288   
80     -368   
16     352    
-128   128    
80     112    
-16    -160   
-96    -176   
144    144    
144    432    
-176   32     
144    -336   
208    -16    
-32    -160   
-48    272    
32     272    
208    -176   
-64    80     
-16    272    
-160   -112   
144    240    
64     272    
-160   -256   
48     -32    
256    48     
544    1584   
-224   128    
-864   976    
1184   -304   
-848   -192   
-96    352    
784    752    
-976   -1040  
-112   -1040  
288    -96    
16     480    
-144   128    
-48    160    
240    368    
-64    336    
-288   96     
336    0      
160    368    
-384   -16    
208    -416   
32     -336   
16     -96    
-1600  1056   
1216   -784   
288    -752   
-672   400    
672    1600   
128    1328   
-304   320    
208    176    
176    32     
-64    -336   
-288   -80    
64     160    
224    160    
-224   416    
-16    192    
112    256    
96     1328   
192    800    
-144   -720   
-16    160    
-96    -128   
176    -272   
480    1040   
592    320    
-128   -288   
192    240    
224    832    
368    -688   
-912   -1696  
368    304    
96     480    
-224   272    
-240   -160   
1024   -464   
16     304    
448    1024   
-416   880    
-352   800    
320    -208   
-320   640    
512    192    
-48    432    
-48    -256   
-160   512    
112    240    
-368   336    
752    368    
-336   720    
-384   32     
-256   -1392  
1952   -880   
464    -208   
-1008  240    
-96    656    
272    672    
448    -304   
-416   -1216  
-432   448    
-128   544    
-96    240    
416    -192   
-240   -880   
-240   688    
304    -416   
-96    144    
-112   -1056  
192    48     
256    -208   
-112   -368   
-80    144    
96     320    
240    -192   
-736   32     
400    -192   
144    -80    
48     -496   
368    -544   
-304   336    
16     1024   
160    48     
32     -896   
288    0      
80     80     
-384   304    
160    -400   
144    32     
48     -80    
-320   896    
144    1072   
112    64     
112    -80    
208    -208   
-320   64     
48     -400   
416    288    
-16    432    
240    560    
240    -208   
-112   -32    
-96    -400   
576    992    
-864   688    
-128   -192   
736    176    
-608   160    
-208   400    
784    752    
192    992    
-400   -416   
224    -432   
-48    -1776  
-128   -432   
80     -224   
-112   -32    
0      -160   
160    144    
-96    -336   
-400   32     
112    208    
384    144    
-176   208    
32     -32    
0      144    
-256   -240   
368    -224   
-240   -240   
-16    32     
128    -32    
160    464    
64     96     
-480   -2208  
80     -688   
32     -624   
-224   -432   
784    -192   
-384   560    
176    208    
16     208    
32     -544   
16     -192   
0      0      
-48    64     
-16    -1248  
112    240    
-48    160    
-96    -368   
-112   -752   
192    -1600  
112    -592   
128    -320   
-144   336    
-512   -672   
176    368    
608    -208   
-672   224    
592    -512   
-480   448    
128    -208   
208    -1216  
-80    128    
32     -624   
32     112    
0      -608   
48     32     
-16    -80    
-256   192    
400    -96    
-240   -144   
480    -384   
-560   -80    
352    -160   
-16    -1024  
64     128    
112    -560   
-208   208    
368    -464   
240    16     
-400   48     
288    48     
128    208    
-1728  -528   
-1392  -1168  
2736   -512   
-688   -416   
-368   -48    
496    -112   
224    -144   
-416   -176   
384    224    
192    16     
-128   192    
64     -48    
-304   16     
128    0      
160    32     
-144   -288   
-96    -224   
208    -96    
144    -16    
-160   -96    
-64    48     
656    -1104  
-1296  -528   
-688   16     
1408   272    
352    48     
-368   0      
-288   80     
384    64     
-144   208    
-32    -256   
128    -160   
208    128    
-272   -240   
336    128    
288    -64    
-384   -1840  
464    -48    
-224   -112   
224    32     
240    64     
-192   -128   
-496   -288   
944    176    
-848   -48    
-400   192    
288    0      
-384   -272   
496    96     
-304   -144   
-304   -128   
-288   -144   
320    240    
320    -176   
-144   352    
-640   -432   
432    -640   
-176   288    
-400   48     
96     -416   
160    160    
-688   -192   
16     -160   
272    -96    
16     -192   
368    560    
-896   -224   
-16    64     
432    -48    
32     128    
-496   912    
2320   -1360  
-1184  416    
608    80     
816    -32    
-1072  96     
-816   -320   
1120   256    
-96    -448   
-864   64     
-48    112    
128    -80    
560    64     
-256   -304   
-240   -80    
-128   64     
400    96     
48     -128   
-192   48     
96     -544   
-976   -112   
832    -304   
-400   80     
608    -16    
240    -400   
-336   80     
400    -192   
-416   112    
448    -160   
-352   384    
112    352    
96     32     
-192   -32    
-80    0      
-32    16     
144    -176   
-112   112    
272    224    
-336   336    
32     -224   
144    224    
-368   -240   
192    208    
-640   -144   
448    16     
272    224    
-624   16     
-224   48     
240    368    
224    160    
-288   80     
-64    -64    
-368   -560   
256    -288   
-928   -1472  
-528   -1200  
256    -144   
-64    352    
272    672    
-272   448    
-288   272    
-16    400    
32     208    
-816   0      
-64    272    
32     272    
64     224    
224    -288   
16     160    
-144   144    
-160   48     
48     -800   
-144   -336   
208    -384   
-480   -48    
-176   -16    
48     -592   
256    -32    
-208   720    
-448   368    
288    -784   
-240   -976   
720    -1712  
-800   608    
-48    -320   
32     -208   
-240   240    
400    192    
-256   -720   
368    832    
-336   -64    
128    272    
160    32     
-256   96     
-272   -80    
-176   192    
80     128    
-112   -64    
16     -16    
-48    272    
-48    32     
-192   -368   
800    -608   
-288   400    
-400   -848   
176    -400   
-224   112    
368    -528   
-432   -944   
-144   80     
-336   592    
64     -176   
64     128    
16     -304   
0      0      
224    -16    
144    -64    
112    128    
-256   208    
-352   -16    
432    -592   
16     -144   
-304   320    
-16    64     
-16    256    
-672   -272   
400    -176   
-1328  48     
192    -80    
272    -224   
-288   272    
-592   -1040  
2800   -704   
-864   1584   
-816   48     
1040   -16    
-528   192    
80     -112   
816    768    
-224   128    
-448   -464   
256    400    
-32    -32    
-16    208    
64     48     
-80    240    
-16    0      
-16    272    
16     256    
-112   128    
-192   -32    
0      112    
-144   -912   
-656   -80    
512    256    
-464   -512   
464    32     
-352   128    
-224   880    
480    1008   
-432   -512   
-336   -1088  
384    32     
-176   560    
-176   32     
0      368    
-176   1104   
-240   432    
256    -304   
-160   272    
192    112    
-80    320    
-320   -32    
544    784    
-512   624    
-240   32     
400    1264   
240    1072   
-48    752    
128    16     
-544   816    
512    720    
0      320    
-528   448    
208    -128   
-48    528    
368    -224   
-752   480    
352    1088   
-464   576    
0      224    
240    -144   
-368   192    
128    -64    
-48    656    
64     192    
-240   -128   
48     -384   
112    -240   
288    -592   
-32    -224   
-64    144    
-192   -2544  
-1712  -784   
1008   96     
-32    1088   
160    144    
-432   -128   
-608   -496   
928    -528   
224    -1296  
-464   336    
-304   304    
-32    -272   
304    272    
48     -464   
-432   368    
-448   208    
528    368    
0      -208   
-112   -864   
-768   -1024  
352    16     
368    144    
-464   -64    
240    480    
-256   672    
-48    -336   
464    -816   
96     96     
-80    -16    
32     80     
-96    48     
320    352    
-16    -192   
16     -144   
304    256    
-128   640    
112    208    
16     -16    
-128   240    
0      448    
-64    416    
112    176    
0      -160   
144    -128   
-16    -336   
0      -832   
-32    -480   
0      -672   
32     -704   
-368   -416   
272    -288   
192    -560   
-1296  -208   
1088   192    
256    128    
-272   -112   
272    256    
-448   272    
192    464    
-80    -400   
176    320    
176    112    
-240   160    
144    464    
240    336    
-192   -176   
160    -304   
80     -192   
272    -336   
-48    144    
96     -176   
-576   -160   
320    256    
288    240    
-240   -272   
-96    16     
224    -224   
-144   -16    
64     48     
32     224    
-480   -528   
1312   672    
-544   576    
-240   -320   
-240   112    
16     -16    
272    16     
96     -112   
224    336    
-656   -768   
80     -16    
496    80     
-160   48     
-176   128    
16     80     
256    -400   
208    32     
-416   -32    
224    256    
-144   96     
-80    16     
576    -752   
-1168  256    
880    -48    
-496   -912   
-128   64     
400    -1056  
-240   208    
80     240    
-32    160    
288    48     
-144   32     
-48    160    
16     -16    
64     16     
128    112    
80     -112   
-256   -176   
96     0      
-144   -64    
288    288    
32     -48    
-320   128    
-16    -32    
0      48     
400    -96    
-592   112    
576    128    
-272   96     
-80    16     
16     -720   
496    -848   
416    32     
-48    160    
-304   -416   
656    336    
-688   -656   
80     320    
224    -528   
-288   80     
240    48     
-336   16     
288    128    
32     16     
-224   -32    
336    16     
-16    144    
-256   -112   
160    144    
464    -416   
-112   112    
-112   -576   
-160   -352   
-784   272    
2112   192    
-1376  -752   
-928   304    
1840   -64    
-800   -32    
256    -16    
400    -192   
-256   80     
192    -48    
96     144    
-112   -624   
-32    80     
-320   32     
368    96     
-48    -80    
16     240    
96     -160   
192    64     
-48    -80    
624    800    
912    -48    
-1136  -176   
912    -64    
-16    0      
-640   800    
-256   208    
656    -336   
32     -256   
112    112    
-144   -1200  
-64    -32    
240    -32    
752    -1648  
-560   208    
192    -128   
-96    -1200  
-208   -368   
320    0      
160    -16    
-256   208    
96     -144   
48     64     
-112   -400   
256    544    
384    80     
-240   -240   
272    208    
976    3760   
672    1648   
-912   256    
1328   -1088  
-464   -32    
-288   -256   
352    -96    
384    -416   
64     -112   
-416   -2496  
352    128    
-176   -128   
-112   112    
528    -160   
-560   128    
48     -176   
-272   176    
112    -240   
96     -96    
-272   -1168  
-480   -624   
288    16     
80     -592   
496    -176   
352    -2224  
-928   112    
624    -336   
-224   272    
32     -208   
368    528    
-400   336    
208    208    
128    240    
-16    -48    
-80    -96    
-16    0      
160    -672   
-720   -496   
384    -96    
128    -208   
16     64     
-144   -1872  
-32    736    
576    128    
-176   -128   
-320   -640   
384    -592   
-624   -784   
192    -80    
-128   384    
-128   -64    
-16    -224   
-144   864    
784    -96    
-528   -624   
368    -48    
-176   -1024  
-592   -960   
-480   -1664  
208    -1216  
-176   320    
16     -336   
-64    -320   
64     -160   
-64    48     
-16    48     
-320   -384   
-80    144    
320    192    
96     -352   
-64    -160   
144    -592   
144    880    
-96    96     
432    112    
-416   16     
304    -208   
-32    -208   
-464   -112   
288    80     
176    144    
-272   -112   
-352   -1120  
-48    -768   
192    400    
-320   288    
-32    176    
32     240    
96     -1136  
352    288    
-192   160    
-32    272    
-128   176    
-32    112    
-224   -48    
-16    208    
32     112    
-96    -304   
-144   -48    
112    -96    
96     -160   
208    -512   
-640   944    
848    -1536  
-896   -96    
512    -64    
-96    208    
-144   288    
144    32     
-336   -64    
128    -240   
64     -48    
80     80     
-48    320    
-64    -464   
272    -400   
144    16     
96     288    
-16    48     
-320   224    
0      256    
256    80     
-352   -192   
-160   -160   
16     32     
240    -16    
-288   320    
176    160    
-320   16     
-192   -256   
192    128    
-1024  16     
-448   1696   
2656   -512   
-1632  416    
-240   -192   
576    -496   
176    320    
-128   -432   
464    -880   
-336   -256   
-208   1088   
-496   208    
192    -528   
-464   208    
128    288    
96     -368   
-64    176    
-160   80     
96     432    
-48    -160   
-240   112    
448    928    
-288   -992   
-1584  400    
1232   608    
-560   1120   
-448   128    
800    368    
192    1120   
-64    1072   
-32    -608   
-288   -432   
-16    -32    
160    -48    
-144   0      
64     96     
-272   0      
-48    -112   
-128   784    
-544   368    
288    -80    
-80    -240   
112    112    
-32    -352   
144    640    
288    160    
-560   416    
384    -64    
-400   1424   
1024   64     
-384   -96    
-480   -336   
192    48     
-144   112    
-32    -80    
224    928    
-240   -176   
-256   528    
112    96     
32     -96    
80     464    
-368   208    
80     -16    
640    288    
-416   -48    
-544   112    
32     -1008  
-288   144    
480    144    
-720   -208   
-176   128    
112    -128   
288    -784   
256    112    
928    576    
-1264  608    
-80    848    
640    416    
-256   -400   
-160   384    
416    -112   
-32    0      
-32    -64    
-80    -16    
-112   160    
208    352    
-160   112    
-32    256    
96     -112   
-496   -640   
608    -1600  
-288   32     
32     512    
80     640    
80     -96    
-656   32     
592    288    
32     -240   
-128   -400   
-256   -48    
304    160    
-464   -80    
128    64     
-16    96     
16     528    
64     224    
-384   0      
112    480    
512    512    
-448   224    
16     160    
304    32     
-320   16     
256    352    
-512   16     
-208   160    
64     -96    
-176   -1040  
-304   -224   
192    -224   
-16    -80    
160    0      
-240   -128   
416    0      
528    256    
-512   -336   
-48    -48    
48     -32    
-128   -64    
160    64     
-16    -240   
-432   -128   
0      128    
48     80     
144    176    
-80    176    
-256   -272   
544    -208   
32     192    
-240   -128   
272    320    
48     208    
-208   -320   
64     480    
-112   224    
160    176    
-160   -96    
-48    224    
-304   368    
240    64     
176    -48    
-192   16     
1216   1568   
-2880  1152   
256    -176   
1200   32     
-608   -112   
-176   32     
80     432    
240    96     
-384   160    
560    -176   
-336   240    
-256   -16    
336    144    
192    304    
-432   -208   
112    160    
-32    416    
96     -48    
-48    -48    
128    96     
-480   -608   
624    -656   
-656   432    
352    288    
592    -176   
-720   144    
272    -320   
-16    400    
688    -16    
-736   64     
144    0      
-80    416    
672    16     
-464   48     
-32    144    
64     64     
160    48     
160    -96    
16     208    
-16    -16    
-112   48     
240    144    
-64    96     
0      80     
-96    128    
560    64     
-544   32     
144    64     
-80    112    
96     80     
-976   -608   
-3248  -608   
2128   -864   
96     -304   
-1392  80     
1232   144    
16     -160   
-304   640    
-464   480    
384    -80    
128    128    
-224   -192   
-160   128    
160    144    
-528   -16    
544    160    
-48    32     
-256   240    
176    -224   
-64    240    
-16    -32    
336    656    
-80    -592   
-848   336    
480    -864   
32     -240   
-208   -272   
96     272    
352    32     
-64    -128   
-368   -96    
128    -192   
-176   128    
208    -96    
240    272    
-384   32     
-208   112    
192    48     
240    336    
32     240    
-160   0      
-144   32     
112    -304   
-656   160    
544    -80    
-560   -144   
512    80     
224    16     
-208   -352   
352    272    
96     -704   
-96    64     
-48    -256   
-288   16     
0      176    
560    -224   
-528   112    
416    -32    
-96    -32    
-48    272    
160    64     
-16    16     
64     80     
32     -224   
16     144    
32     192    
-352   80     
32     96     
240    48     
-256   -608   
304    640    
1312   224    
496    64     
-1984  -352   
16     192    
1744   240    
-976   656    
-240   -352   
64     240    
160    16     
-160   -272   
128    -128   
-208   -1200  
-336   160    
304    48     
288    432    
-432   80     
16     144    
-112   -288   
48     -1360  
-384   -944   
272    32     
16     336    
-144   192    
736    -256   
-528   -880   
0      32     
-64    -1136  
-176   -704   
96     -592   
-32    1168   
112    416    
-144   -32    
80     -160   
160    128    
-48    160    
128    -128   
-272   16     
80     -704   
320    240    
-288   0      
208    -208   
64     -624   
-448   -560   
-368   -1232  
48     -384   
224    256    
-80    32     
608    -432   
32     112    
-208   320    
48     -144   
-144   -832   
768    -912   
-416   -1056  
-512   -272   
560    32     
-160   -1504  
272    -64    
-176   1920   
320    -96    
48     64     
-176   384    
272    -128   
-48    -48    
-384   -656   
240    -128   
32     -144   
16     -160   
256    -336   
32     48     
48     32     
160    -320   
160    -1744  
-80    112    
80     -560   
-64    192    
352    -160   
32     -1344  
-64    -64    
-80    -1360  
176    -80    
416    -560   
-816   160    
496    288    
-400   48     
160    0      
256    48     
224    -176   
-592   320    
240    352    
96     112    
-32    -352   
-224   -80    
-80    16     
144    -224   
320    48     
0      -96    
-240   176    
-128   -3232  
256    -384   
128    0      
-256   1072   
800    -400   
-1136  64     
688    -336   
-224   -208   
-96    -224   
400    -848   
-336   352    
80     -224   
-176   -272   
256    16     
96     240    
-48    -432   
-64    -224   
-80    48     
128    128    
400    -16    
-320   -272   
-128   -160   
128    -112   
48     80     
-160   -144   
-432   128    
-160   192    
-112   256    
176    -160   
240    0      
-240   -432   
112    32     
-112   -2448  
560    880    
1392   208    
-976   128    
288    -256   
-160   -400   
-192   1072   
208    -112   
-272   -1568  
-272   496    
32     192    
160    -80    
-176   0      
64     -160   
64     528    
-16    -688   
32     -240   
112    -288   
-16    -928   
-16    -544   
128    112    
496    1040   
-1760  -96    
144    448    
256    32     
-80    -768   
336    -576   
-224   192    
32     80     
-304   176    
304    -1264  
-400   -176   
-16    64     
-64    -16    
224    -64    
160    -48    
-1024  144    
512    16     
-368   16     
368    -112   
96     -48    
-352   -96    
96     256    
-304   -80    
176    -1312  
-2144  -16    
224    176    
704    -752   
-944   -1184  
-32    96     
80     368    
-672   0      
160    -128   
-16    -128   
0      208    
192    320    
-128   -768   
-544   96     
928    176    
-192   160    
-224   -1072  
-576   352    
496    -48    
-48    112    
-192   -208   
-128   32     
96     512    
800    -64    
-448   -144   
-336   -208   
288    608    
1520   3552   
-1648  1952   
1120   -272   
832    -368   
-2016  -176   
-48    -144   
1056   -160   
464    -624   
32     32     
-592   -192   
176    128    
256    -80    
-32    80     
-64    -48    
48     224    
-240   -64    
-48    160    
-256   -368   
-416   -96    
816    -1104  
-544   -48    
192    -80    
-288   144    
-896   -32    
-192   -16    
112    -32    
-272   16     
-112   64     
128    -32    
-256   -64    
176    -128   
-128   48     
-336   -112   
560    400    
-288   96     
-64    224    
160    240    
128    -512   
-192   -176   
-32    16     
16     288    
288    48     
-272   32     
96     -208   
-352   32     
-112   -224   
336    96     
-528   -176   
272    16     
-32    112    
-96    16     
-80    -352   
656    -48    
304    16     
-592   -48    
96     240    
-96    240    
-288   144    
240    64     
-32    208    
64     -64    
-48    144    
80     -80    
48     192    
-224   128    
112    -192   
-96    -224   
-224   -96    
-160   -96    
384    -224   
-128   128    
-416   -176   
64     192    
-32    -32    
32     464    
-32    0      
176    96     
-320   64     
16     -176   
16     32     
32     144    
448    -1392  
-2336  1376   
1488   -48    
64     416    
-176   -32    
-16    -176   
-288   64     
288    576    
-576   784    
-144   -304   
16     176    
-432   -48    
48     -48    
288    176    
-432   240    
144    -160   
-288   256    
32     16     
-16    -240   
-32    144    
0      160    
-432   -672   
-32    192    
672    160    
-1072  -208   
-16    272    
16     -352   
-64    160    
480    288    
-256   -64    
-112   80     
-192   0      
384    -144   
-128   96     
0      -64    
-368   -16    
368    208    
96     48     
-352   144    
-256   -80    
64     80     
96     48     
32     80     
224    112    
-160   208    
64     -16    
-160   272    
320    -96    
-240   144    
64     240    
-1216  -208   
400    336    
128    144    
-1024  -96    
736    544    
624    -64    
-720   256    
176    -384   
-720   -240   
224    -256   
176    112    
32     16     
-64    128    
-272   -176   
496    80     
-224   -192   
-16    208    
-64    96     
288    704    
-336   384    
-160   64     
640    800    
-1616  -368   
192    416    
496    320    
272    -192   
-144   528    
-272   160    
-128   16     
160    112    
-48    -80    
-48    128    
-384   -32    
240    128    
128    176    
48     -48    
-480   176    
240    64     
64     -272   
192    -32    
-112   352    
-48    208    
224    320    
-592   176    
-448   160    
48     480    
784    -272   
-288   -80    
-64    240    
48     112    
272    112    
-448   160    
-464   432    
1088   -160   
-352   240    
-672   -128   
768    -400   
-64    112    
112    272    
-80    160    
-160   32     
176    48     
96     32     
-64    96     
-64    96     
-256   0      
480    384    
480    80     
-256   -64    
-368   -80    
320    -1136  
-400   -3424  
-1680  -1472  
896    -368   
1008   -32    
-464   32     
32     80     
-240   -752   
192    16     
32     240    
560    624    
-352   528    
-320   -272   
432    -112   
48     176    
-32    -112   
-416   -240   
-96    480    
-80    -64    
-176   -336   
144    -16    
32     192    
-64    -16    
-64    -80    
-208   -176   
-240   -656   
-112   80     
192    16     
96     -592   
64     -784   
-64    112    
-400   144    
208    176    
256    -432   
-80    208    
-48    656    
-16    688    
240    288    
144    -80    
96     -48    
-112   -448   
240    160    
112    480    
-16    128    
32     80     
0      160    
272    432    
0      1424   
192    -736   
0      192    
-208   -688   
144    144    
224    128    
-16    -464   
-560   -32    
688    112    
-80    608    
-80    432    
-16    768    
512    560    
32     16     
-32    16     
-160   -96    
-48    -48    
96     320    
-96    -16    
0      -32    
-16    -16    
-80    -160   
-32    400    
192    -1152  
-304   128    
160    -48    
-64    224    
64     48     
48     64     
240    -288   
-544   -16    
32     336    
448    304    
-304   112    
-144   -144   
-224   -96    
624    -624   
80     448    
112    -720   
-96    160    
48     352    
-48    96     
304    208    
-16    448    
-288   48     
336    -48    
-80    32     
-32    160    
192    240    
-112   -32    
32     0      
192    -160   
48     128    
48     -672   
64     96     
352    -80    
-528   448    
416    -128   
336    -192   
-208   -16    
48     464    
96     544    
192    128    
32     288    
-64    -32    
80     112    
160    -576   
-48    224    
-80    480    
224    128    
-96    -224   
-176   288    
-128   624    
592    48     
-224   -512   
-304   -128   
176    80     
128    336    
-176   96     
160    96     
32     192    
-336   -368   
544    48     
656    -128   
-1072  288    
1600   352    
-1872  1024   
-272   -176   
192    -592   
-96    -304   
-720   -144   
1088   -544   
-160   -496   
-448   144    
384    -96    
176    240    
-64    -368   
48     48     
0      48     
-96    288    
16     160    
16     64     
272    -256   
-304   -2640  
240    -160   
-32    -416   
-16    -1808  
-640   224    
1072   -1760  
-480   -64    
-96    208    
96     -192   
112    112    
-272   224    
0      -928   
464    240    
416    -448   
-480   -96    
-160   -112   
256    -32    
128    16     
-176   -160   
-192   -256   
272    -544   
224    -64    
-128   -112   
48     32     
-128   -160   
784    -448   
-448   -1120  
160    64     
272    864    
400    208    
-128   1104   
352    768    
-480   -96    
256    0      
-176   -208   
-208   96     
208    272    
80     -448   
-304   576    
-256   -1024  
32     -208   
176    -288   
32     16     
144    0      
-304   0      
64     -144   
16     -112   
-48    128    
96     16     
-432   64     
272    -128   
-96    -48    
-592   -1392  
-1200  592    
816    304    
-576   752    
-496   -320   
1008   80     
720    -432   
-944   320    
-64    -128   
-96    -192   
224    -544   
-96    16     
-1120  -80    
-112   -272   
208    -128   
256    -320   
-528   128    
80     -160   
32     144    
320    -2320  
-896   64     
624    -352   
-544   160    
384    -16    
720    208    
-704   -112   
-592   -32    
496    16     
368    80     
-1856  -208   
32     96     
544    -128   
-64    0      
-144   64     
-80    -784   
-144   -32    
336    80     
128    -112   
-208   16     
352    -336   
-96    -32    
176    -112   
-464   -32    
176    96     
240    432    
-208   320    
-256   224    
32     -48    
368    -32    
-224   -864   
32     16     
240    -256   
-48    128    
160    -144   
-160   1232   
-288   592    
144    448    
96     224    
-368   48     
-336   -208   
256    -272   
-16    -208   
-272   -240   
320    64     
32     -592   
-144   48     
-64    96     
16     -256   
80     -288   
-64    160    
-368   112    
128    -32    
48     -80    
-16    -32    
-176   -128   
-48    -208   
288    32     
144    976    
272    -64    
-208   -432   
-48    656    
352    432    
720    2800   
1664   -16    
-1856  224    
224    80     
816    -208   
-560   320    
32     -96    
80     544    
256    -208   
-192   -224   
-96    -272   
-176   320    
-864   -464   
-608   48     
368    -208   
-704   240    
-112   -64    
-1168  -432   
16     160    
-16    16     
560    800    
-1456  256    
704    16     
-16    -448   
-320   -16    
-192   -128   
-240   64     
-304   -448   
-144   240    
144    144    
-400   192    
-96    80     
112    -96    
-272   32     
-288   -160   
0      -48    
-128   64     
96     64     
-112   -48    
144    64     
-176   0      
-32    176    
-64    32     
-224   128    
544    32     
-480   -112   
-80    240    
-96    0      
-16    96     
32     96     
-896   1056   
1552   -144   
-640   48     
144    -336   
192    128    
-496   320    
96     288    
192    144    
-48    -64    
-128   -80    
-16    48     
96     112    
-16    16     
128    160    
-400   64     
-208   288    
-352   -272   
240    64     
-208   -112   
80     160    
-96    -112   
-608   -640   
1232   -704   
96     448    
-448   64     
-80    32     
288    -48    
-160   -32    
0      240    
64     -96    
-48    48     
80     0      
-112   112    
-112   -48    
176    176    
96     -96    
-240   48     
16     224    
112    160    
-64    240    
0      16     
-144   -80    
-16    -288   
384    -272   
304    160    
-192   656    
48     -112   
448    -48    
-992   48     
-144   -80    
880    -240   
-240   16     
208    96     
-112   -64    
544    -128   
-640   80     
624    -304   
-800   -112   
-160   272    
336    48     
96     0      
-576   -208   
-192   -16    
-704   -112   
160    208    
624    1152   
-816   960    
-64    32     
224    -464   
-144   -256   
-304   336    
-704   2640   
912    640    
-592   -368   
112    -16    
1184   432    
-32    -288   
-592   -560   
-96    -112   
112    224    
-80    -96    
-160   -208   
-112   256    
272    -160   
176    192    
-176   -208   
-48    -96    
-96    752    
272    -224   
-176   -384   
-112   -256   
-144   240    
144    128    
80     -512   
192    -496   
-192   -304   
-64    48     
144    -32    
-16    -96    
192    -16    
-256   -368   
-32    416    
-128   -240   
-128   96     
192    64     
-48    320    
-176   416    
176    -496   
-432   -816   
224    528    
96     352    
-112   336    
-128   -336   
-160   320    
32     -96    
-16    -384   
288    -64    
-96    288    
0      304    
0      560    
0      -624   
-240   208    
-224   1296   
1264   880    
-112   656    
-16    496    
112    176    
32     -352   
-192   848    
-16    -1120  
-208   320    
-160   640    
32     208    
384    64     
-96    -512   
-544   256    
64     -16    
192    176    
336    -416   
-64    160    
-96    336    
144    16     
80     64     
0      -32    
144    80     
-176   0      
-48    -480   
-544   -592   
-16    -160   
0      -176   
256    -64    
-320   48     
-336   1440   
1024   -224   
-480   32     
320    288    
-144   32     
-240   128    
-400   544    
64     448    
-208   -336   
-240   -240   
80     -96    
224    48     
-208   48     
32     112    
-64    48     
32     -192   
240    -64    
-32    -80    
-192   48     
-144   -336   
528    -1104  
352    -48    
-144   128    
-112   -80    
-48    272    
224    -464   
320    -240   
-368   272    
-160   432    
96     -208   
240    272    
16     96     
-48    560    
112    -432   
-48    0      
192    320    
-48    -288   
-32    192    
272    112    
80     80     
16     32     
-48    160    
160    -16    
-160   -384   
288    48     
-128   -592   
-64    160    
128    96     
32     -416   
848    880    
-1152  1520   
-64    224    
624    -240   
-1264  -224   
800    288    
80     208    
-464   160    
64     -320   
-176   -16    
192    -16    
-160   64     
224    48     
-80    128    
208    176    
-432   144    
336    -32    
0      432    
-32    320    
128    80     
96     0      
-160   -80    
896    -480   
-1440  320    
1360   -224   
-96    256    
-1056  -128   
400    -48    
320    -1072  
304    -80    
-240   64     
-48    224    
-208   -448   
240    96     
96     48     
112    48     
-480   80     
256    32     
144    -144   
272    -48    
192    224    
-528   -352   
-64    -176   
736    64     
720    0      
-176   -512   
-192   -192   
-128   16     
432    128    
832    -416   
-416   192    
128    16     
-128   -32    
416    80     
-144   -192   
-416   128    
-32    96     
464    -48    
224    -160   
-352   160    
128    -32    
-176   96     
16     160    
448    128    
-192   224    
-576   64     
-128   256    
1104   -288   
-240   448    
320    -688   
816    1632   
-2400  -816   
-96    848    
1088   -112   
-896   144    
464    -16    
176    0      
-64    -48    
64     -96    
32     336    
-128   -48    
-16    288    
224    -752   
-272   192    
-32    -80    
-112   80     
176    -144   
32     112    
-480   -320   
16     -336   
1056   -352   
-192   -160   
-256   -32    
80     304    
-864   -400   
544    64     
672    48     
-720   80     
288    144    
-80    -32    
256    96     
-80    -64    
80     80     
32     -48    
112    400    
-208   -288   
-256   160    
400    -96    
160    -1248  
-208   16     
-848   32     
528    -32    
-224   -144   
-16    -416   
80     112    
-80    -368   
-112   64     
720    128    
-1008  -96    
304    -400   
80     48     
16     -448   
208    48     
-80    528    
1008   -128   
-768   48     
416    -176   
96     -176   
-208   -144   
256    -176   
-64    -512   
-96    -208   
-176   240    
192    -16    
64     -512   
32     32     
240    -32    
-160   32     
-48    -352   
144    -352   
-208   16     
-272   -128   
-96    48     
176    -176   
-160   144    
64     -416   
112    -112   
256    -816   
-128   0      
96     -48    
80     640    
288    368    
-176   -1840  
-880   800    
1200   -224   
-672   320    
592    -160   
-1376  -32    
-368   192    
288    -160   
96     112    
208    -240   
-432   -1248  
0      80     
96     -32    
96     64     
-272   -112   
176    48     
-240   400    
224    0      
0      -144   
-208   -16    
-208   144    
800    1072   
-128   -336   
-560   -592   
480    240    
-96    -144   
-144   256    
320    -480   
80     -256   
-288   -240   
-96    -32    
416    0      
144    -80    
-272   144    
208    160    
-368   208    
176    192    
-368   -16    
160    -160   
-192   96     
-48    64     
688    416    
-368   -192   
-96    352    
0      -272   
208    64     
128    -16    
-64    80     
-224   48     
-160   -416   
1008   1248   
-496   -80    
-2080  -336   
2112   272    
-400   -304   
-784   -400   
928    464    
-384   80     
208    96     
32     80     
-288   176    
-112   -32    
96     224    
48     -224   
128    -64    
-192   -272   
128    128    
16     128    
-224   -288   
32     -80    
144    -64    
368    544    
-2000  208    
208    -288   
752    -752   
-1072  -352   
608    464    
-384   -96    
-432   224    
496    -192   
-112   128    
176    -32    
-880   112    
48     -336   
96     64     
-32    -240   
64     -80    
-112   -224   
-656   -1056  
-272   -352   
-208   -256   
-80    160    
80     16     
-112   -624   
832    -1456  
-432   -1088  
-384   -480   
320    288    
-528   -400   
0      -112   
256    464    
-16    256    
-400   -608   
-224   -176   
-32    224    
-720   -144   
192    -672   
-16    -64    
-448   -368   
128    -192   
272    384    
96     -64    
64     128    
96     16     
-208   560    
-192   -144   
80     -96    
-704   -64    
128    672    
416    448    
-448   96     
-640   -1328  
1696   -1632  
816    752    
-1232  400    
-1136  368    
352    400    
112    -1408  
208    -1120  
80     912    
-560   -896   
0      16     
400    640    
336    -224   
-16    112    
-352   320    
48     576    
240    -432   
-160   -272   
-112   -512   
-240   -160   
-240   -1056  
304    192    
-64    320    
-688   32     
400    -384   
544    -160   
-464   256    
96     -320   
-896   -1936  
352    464    
-112   240    
-80    64     
240    -448   
-80    -384   
-176   -320   
-704   608    
-160   336    
-576   -400   
176    272    
240    0      
-192   176    
32     208    
-256   -352   
272    -96    
64     416    
48     1056   
-240   -272   
-144   352    
288    208    
-464   496    
-96    -128   
-32    32     
544    -592   
-592   -16    
-80    496    
48     416    
112    528    
208    240    
48     1008   
-352   1632   
224    -208   
-32    -224   
-48    144    
-16    -368   
176    48     
-304   544    
-624   240    
-48    -112   
368    -352   
144    192    
-112   416    
-432   112    
160    -336   
304    -208   
96     144    
-16    -16    
64     -416   
-320   -1200  
368    -192   
160    608    
-240   -128   
688    1776   
-1360  1872   
-64    -160   
560    -976   
-176   -1328  
-240   288    
592    432    
48     608    
-352   480    
64     128    
48     240    
48     -16    
32     -336   
-192   592    
-320   -128   
144    32     
-96    -320   
-304   -64    
16     336    
96     80     
48     608    
-432   -320   
368    240    
-352   1056   
-224   32     
240    -16    
-160   208    
-80    32     
-16    176    
-160   -160   
32     112    
96     80     
80     -32    
80     -64    
-192   144    
-48    -256   
480    -608   
-48    576    
-336   304    
48     112    
32     64     
-80    -16    
-128   128    
128    16     
208    176    
-112   32     
-192   224    
32     16     
112    128    
144    -96    
336    -736   
-1968  -752   
960    -32    
-16    160    
-544   -16    
128    128    
48     -48    
32     480    
96     32     
304    112    
-192   -64    
-64    160    
96     -16    
-16    160    
240    128    
-336   304    
0      -112   
-464   160    
512    48     
-80    80     
-160   -32    
-16    -464   
1216   208    
-880   32     
96     -208   
208    0      
48     384    
16     0      
96     80     
272    32     
-224   208    
-288   64     
304    96     
64     64     
-32    32     
144    128    
-80    96     
-80    256    
-272   64     
256    240    
272    208    
-400   48     
432    960    
-736   -128   
-704   -448   
656    176    
656    640    
-144   272    
-304   48     
368    16     
16     -272   
-432   -80    
-192   -48    
224    32     
336    -192   
-32    -96    
-608   -144   
-96    -448   
544    -32    
48     112    
-496   144    
-224   272    
1104   368    
-512   272    
-544   32     
-64    16     
96     624    
704    -464   
-416   192    
544    -128   
688    1392   
-2000  -240   
-576   1056   
1424   1408   
-160   272    
-288   368    
-48    256    
192    0      
48     384    
-192   112    
-48    160    
576    144    
-368   -16    
192    -32    
-128   128    
224    -1296  
-32    144    
512    112    
-656   0      
-96    -176   
1264   -160   
-432   -112   
-32    224    
-256   -48    
-256   224    
672    -112   
-544   144    
400    64     
-48    -128   
-16    -64    
-64    -368   
512    -144   
-320   144    
192    208    
-208   304    
-32    160    
-128   -288   
400    16     
-272   -160   
96     -128   
288    0      
0      96     
112    144    
-96    -32    
320    144    
-320   -352   
-16    112    
160    -400   
16     48     
-128   -688   
-400   -496   
224    -304   
48     -304   
448    -368   
-256   112    
320    80     
192    112    
-272   -32    
128    -32    
48     176    
48     160    
320    112    
-128   -32    
-16    112    
-80    -608   
-32    96     
208    48     
192    -64    
-272   32     
304    256    
-208   304    
-32    288    
128    224    
-64    -640   
-224   -352   
16     -464   
240    320    
208    288    
-288   144    
-80    -1680  
64     -64    
128    -48    
368    -1168  
-1536  1664   
1792   384    
-800   512    
144    -1408  
0      -784   
-416   -416   
-48    608    
416    128    
144    208    
-368   -64    
-144   64     
192    208    
304    16     
-320   224    
-176   -384   
256    -528   
288    -96    
192    -288   
-144   -96    
-208   -112   
656    -752   
-336   672    
224    96     
-176   -512   
112    112    
32     -272   
80     672    
128    -432   
-256   224    
144    -1808  
-16    112    
256    -208   
-64    -704   
80     -448   
32     -224   
-96    -192   
160    16     
-80    -400   
32     -32    
48     144    
336    112    
-144   128    
-32    -2064  
128    -64    
240    -1264  
96     384    
-464   -48    
-80    -304   
0      48     
-224   -736   
2112   -896   
-1776  -992   
912    -336   
112    -944   
-720   -160   
64     -480   
768    -848   
-176   -32    
-112   1232   
96     -784   
-32    -16    
144    -48    
16     -32    
-128   -16    
-48    -768   
192    0      
-16    -144   
-240   -48    
176    -1056  
96     -48    
224    -1072  
-1888  1152   
1840   -112   
-528   128    
-384   -544   
880    -640   
-224   -960   
-416   -928   
48     -224   
304    -192   
-240   304    
-112   -128   
32     272    
304    -2080  
-80    -128   
-32    -32    
96     336    
-336   512    
528    432    
256    -288   
-464   -240   
-368   -576   
192    96     
-864   -688   
-112   -288   
496    208    
-592   -48    
-384   -160   
640    -208   
-240   512    
368    -288   
0      128    
528    -256   
-496   192    
48     176    
224    -80    
-752   400    
832    1376   
-656   1232   
-304   -336   
544    48     
-96    -160   
96     560    
-400   336    
32     -16    
336    -608   
-208   128    
64     -720   
32     -368   
48     96     
816    2416   
-720   672    
-176   560    
1584   -384   
-224   -160   
-1200  -656   
288    -1040  
784    64     
96     -592   
-256   -64    
-144   -288   
400    80     
320    352    
-336   192    
0      -128   
-256   -64    
80     -224   
-16    16     
-416   208    
128    672    
48     -80    
96     -288   
-192   -112   
64     224    
496    -288   
-720   -448   
240    288    
-192   688    
176    1904   
-208   704    
-352   -80    
176    -64    
304    -784   
-144   -288   
-16    48     
-32    432    
0      -80    
496    -688   
160    -880   
-416   -528   
288    -656   
192    -48    
-64    864    
-80    432    
-272   -768   
288    -800   
-160   496    
336    -304   
-368   -112   
128    512    
192    240    
352    -288   
-1008  368    
368    -1392  
816    736    
-1888  880    
-544   208    
448    1312   
-704   32     
-112   128    
352    -320   
176    -80    
-144   48     
-352   -352   
384    -272   
16     176    
-384   144    
96     224    
-272   -96    
-112   -320   
96     -1008  
-32    -528   
-32    -160   
-512   -176   
128    128    
96     320    
-224   704    
-96    0      
-80    -240   
192    -240   
64     16     
16     -1712  
-1472  1152   
1120   -64    
-224   -80    
32     336    
32     1120   
80     624    
-192   832    
336    -368   
-96    -272   
96     -400   
-512   16     
48     192    
-112   480    
96     -176   
64     -256   
208    464    
-320   -160   
112    96     
-16    -96    
752    592    
-1136  912    
656    -112   
-384   -304   
-336   64     
448    -112   
-416   256    
48     -32    
-1232  -160   
624    -32    
-384   -112   
-272   192    
96     96     
288    -16    
-16    64     
-368   -32    
-16    112    
16     -48    
336    -144   
-400   144    
96     96     
-240   128    
144    80     
-1104  -288   
128    128    
-192   -192   
32     160    
64     176    
-32    -48    
288    80     
-1648  -240   
2160   992    
192    -208   
-1824  -240   
832    112    
608    160    
-816   304    
384    512    
-304   -176   
-176   160    
144    -112   
176    160    
-208   -64    
-32    -64    
-32    48     
112    32     
-176   80     
192    80     
-32    -32    
-64    0      
-32    16     
-64    -144   
-1328  928    
1168   192    
128    752    
-272   -288   
-128   -416   
144    -320   
-288   -16    
-256   144    
176    208    
400    48     
-64    -32    
-416   144    
112    160    
112    48     
-256   96     
32     -272   
48     16     
352    592    
-1456  0      
96     -32    
528    416    
624    -80    
-656   80     
352    320    
-368   272    
-752   -432   
-592   112    
-416   -240   
752    -304   
144    -144   
-576   384    
-400   -96    
16     112    
304    32     
352    656    
-320   256    
-528   -176   
224    400    
-224   64     
48     48     
16     64     
-64    0      
16     64     
160    304    
-160   208    
176    80     
-96    -128   
176    160    
-816   -880   
2176   -2832  
-704   1456   
288    -176   
544    -144   
-976   272    
224    80     
1072   432    
-976   16     
48     -32    
-80    144    
32     80     
32     80     
64     64     
128    -64    
-320   64     
176    16     
-80    144    
-272   80     
-128   -368   
-32    -176   
-96    32     
-240   -112   
544    0      
256    -112   
-464   208    
-128   176    
128    208    
-48    -176   
-112   -144   
-304   -64    
160    80     
96     400    
-64    160    
32     304    
432    0      
-112   80     
-320   80     
160    320    
336    320    
-96    176    
-304   80     
112    96     
-48    -64    
96     16     
448    32     
-208   -16    
16     -240   
64     -80    
-128   -112   
48     -464   
48     -128   
-128   -480   
368    80     
-176   688    
592    1280   
-720   224    
48     -720   
224    -816   
-352   -432   
0      -240   
256    -192   
-80    -736   
-688   -336   
480    -544   
-176   -544   
240    176    
-144   368    
-32    320    
0      -160   
304    240    
-272   -64    
-96    240    
160    128    
144    -128   
16     -224   
-64    -112   
-64    -480   
0      -16    
160    512    
-64    32     
-32    80     
608    2304   
592    832    
-864   -352   
16     -112   
96     272    
96     -48    
48     192    
96     -336   
-224   -96    
208    48     
192    320    
-96    240    
-112   80     
160    -80    
32     32     
-80    0      
-64    560    
64     176    
-32    240    
-48    -80    
-32    -1024  
-80    -464   
96     -1008  
-240   -304   
464    80     
64     80     
-368   480    
224    736    
-144   592    
-32    80     
224    -80    
-144   384    
-80    -256   
80     -96    
288    272    
32     -224   
-176   0      
-176   -176   
304    128    
32     192    
-96    16     
-128   128    
112    144    
288    16     
32     -160   
-448   256    
64     336    
128    -48    
80     -112   
-80    160    
-656   -1152  
-688   528    
704    -624   
-896   -304   
288    -800   
80     160    
-416   96     
48     -784   
448    272    
32     1024   
-112   -16    
192    -176   
-192   -16    
48     144    
144    48     
16     80     
-80    -160   
288    -16    
160    -144   
0      -464   
-416   -864   
1536   400    
-480   80     
-304   -176   
-352   -1104  
-32    -240   
480    -400   
-464   608    
544    1216   
-80    1680   
224    240    
192    80     
-224   -400   
272    112    
64     -336   
-752   448    
704    416    
176    1536   
-64    1056   
96     176    
80     -224   
32     -112   
-48    16     
-16    -1056  
512    -144   
240    -688   
-592   -848   
-64    -480   
224    -144   
-496   -368   
240    -80    
432    32     
-272   -176   
-400   128    
-96    -192   
576    -224   
32     -112   
16     464    
112    -752   
-16    -288   
96     -160   
-256   64     
192    -112   
-96    -208   
144    -256   
256    384    
-672   304    
32     208    
-48    320    
240    -944   
-160   -48    
-16    2560   
656    -1040  
-832   96     
-96    -16    
816    1488   
224    112    
-560   32     
256    432    
304    0      
144    -1040  
-144   -592   
-64    16     
128    624    
224    -608   
256    -720   
-832   -80    
192    -96    
0      -176   
176    -608   
-208   -16    
-96    -400   
80     96     
736    -48    
400    -80    
-1744  -16    
912    -224   
-96    -272   
496    -192   
-688   -576   
112    -176   
288    -432   
-176   32     
80     -272   
128    -80    
576    -80    
-240   -544   
-368   224    
160    240    
112    -160   
176    -288   
-784   -272   
256    -272   
336    400    
64     544    
272    272    
-656   32     
448    -48    
-1392  -288   
256    -288   
112    -96    
-32    16     
-240   -704   
560    -1728  
448    -320   
-240   -448   
-400   496    
352    544    
256    800    
-368   208    
-80    -96    
48     -400   
-448   -128   
224    -128   
448    -160   
-320   -16    
-128   -336   
272    80     
-64    -144   
-160   -192   
96     -304   
208    224    
-112   0      
320    -304   
-16    -128   
-400   112    
256    80     
0      64     
-32    -176   
80     -352   
-512   80     
32     -288   
-880   928    
2720   -928   
-1264  176    
-304   -816   
736    -128   
-256   -240   
-48    80     
-48    -176   
-320   400    
384    -240   
-96    -32    
-160   0      
-160   -64    
240    -336   
224    112    
-144   -320   
-112   16     
32     192    
-32    -368   
320    144    
656    560    
-1616  496    
656    -112   
496    -224   
-816   -112   
528    256    
-816   96     
96     -256   
48     -192   
352    -160   
-144   96     
-336   -176   
80     192    
480    -496   
-368   -16    
176    -144   
-96    224    
-528   -128   
-144   160    
544    -160   
-320   48     
-224   -48    
-64    -64    
48     -96    
464    -272   
-208   48     
160    32     
0      32     
-160   -48    
-80    -1040  
960    -272   
-960   -960   
352    -304   
64     -96    
-352   208    
512    64     
-608   48     
608    -416   
-192   -32    
-496   -256   
416    224    
-880   -80    
144    80     
-384   -224   
0      96     
144    0      
-896   48     
96     -32    
320    64     
-288   32     
-16    48     
-368   -640   
-384   -288   
-144   -144   
-640   -64    
1216   528    
-832   96     
-176   112    
128    96     
144    -80    
-288   -32    
-320   64     
352    80     
-224   48     
-64    64     
-1184  -128   
-144   48     
160    112    
-112   96     
-16    -64    
96     80     
-272   -176   
-368   -64    
736    -16    
-576   -32    
-432   16     
560    96     
144    32     
160    -128   
-656   -176   
48     -112   
112    176    
-320   -32    
192    176    
320    224    
-352   112    
-272   -80    
-160   112    
-176   -448   
48     32     
16     240    
-560   -64    
240    96     
32     -64    
-160   48     
-192   64     
48     -224   
-992   -112   
352    224    
-416   -192   
-272   496    
2080   -1808  
-64    1216   
-320   -16    
-560   -176   
576    352    
528    -48    
-624   -208   
-352   80     
112    64     
-304   32     
288    96     
-816   -176   
48     16     
-16    -64    
192    32     
-144   192    
-128   64     
-176   144    
336    -592   
-832   -1568  
96     -1328  
16     -112   
16     160    
736    -16    
-528   -400   
-608   208    
160    -16    
352    416    
-64    -64    
-272   -320   
272    -96    
176    -288   
-592   0      
512    32     
-240   0      
16     -832   
-112   -288   
-112   -336   
-384   -64    
176    32     
0      -144   
-400   -288   
48     -48    
-384   -240   
-624   -288   
160    -320   
-112   -112   
272    -112   
-16    -416   
-560   -400   
-336   -368   
80     -1120  
400    0      
64     496    
-272   -16    
288    624    
192    -96    
80     608    
-1184  416    
-112   -560   
416    -336   
-16    608    
16     48     
-16    160    
-32    368    
128    -80    
-48    -256   
16     240    
144    64     
-240   352    
-16    32     
144    -48    
32     80     
-96    96     
32     208    
288    16     
-144   -352   
144    -352   
272    -512   
-192   -208   
-288   288    
960    544    
-1104  784    
512    16     
160    0      
-64    0      
-64    16     
16     32     
-128   -16    
16     -96    
192    -64    
16     208    
-192   128    
80     80     
208    112    
-240   16     
-240   32     
112    -160   
-32    272    
16     32     
32     96     
160    -320   
-976   128    
496    240    
304    544    
-64    480    
-272   -240   
0      0      
48     384    
144    -256   
272    128    
-208   -96    
-512   224    
400    176    
208    -80    
-112   128    
0      -64    
112    112    
-192   -208   
96     144    
96     192    
-32    16     
-96    16     
96     0      
0      144    
-256   608    
576    224    
-224   192    
208    176    
192    -576   
-272   -240   
-400   -1008  
-1696  480    
2256   432    
-1264  592    
176    -16    
480    576    
-464   144    
144    -1776  
528    992    
16     368    
-32    224    
-192   192    
48     -96    
80     352    
-64    -1344  
-80    176    
16     -160   
336    176    
32     144    
32     96     
-400   -800   
1360   480    
-1040  16     
-192   -80    
464    -592   
-192   976    
-416   1648   
256    1088   
640    -816   
-704   208    
368    656    
304    672    
-160   304    
-16    608    
384    288    
-288   -80    
-16    32     
-112   -624   
-288   -256   
256    -144   
-80    96     
-32    -272   
256    -32    
192    -160   
48     -512   
-1344  560    
384    672    
-240   416    
240    -544   
176    48     
-80    -400   
-96    224    
352    -208   
-400   288    
64     48     
-240   352    
96     896    
768    224    
-656   -176   
272    -480   
208    288    
192    -1024  
16     80     
16     -208   
-144   224    
352    112    
-128   128    
-256   -192   
-368   -304   
1056   -384   
176    624    
-112   -304   
368    224    
1056   112    
-1184  -144   
-496   640    
976    -272   
-224   320    
-544   -656   
160    304    
160    144    
-80    256    
400    -32    
-432   -32    
-336   112    
704    32     
-352   144    
-32    -416   
-464   -272   
816    -1296  
-32    576    
-16    368    
-80    208    
-272   -1776  
288    16     
416    -1056  
-256   416    
544    -16    
-448   176    
224    480    
-48    208    
-48    176    
32     -256   
-64    368    
-160   32     
144    80     
16     -592   
288    112    
-208   -288   
0      48     
304    -16    
192    80     
-400   96     
96     400    
-240   240    
-16    48     
128    144    
-128   -320   
112    64     
176    368    
-400   80     
192    -64    
384    624    
-816   240    
144    -208   
336    -64    
-416   256    
16     16     
224    32     
224    416    
144    -96    
-128   32     
-144   -288   
192    160    
112    -112   
160    80     
-160   16     
16     -112   
96     -112   
128    384    
96     -1008  
-224   -32    
0      96     
224    112    
144    32     
-192   -368   
-32    -1392  
32     -144   
240    288    
48     -16    
-160   32     
1328   1824   
-2688  1120   
256    -224   
1520   64     
-1664  640    
480    -672   
-80    128    
416    -720   
-112   160    
112    -144   
-192   -592   
-16    -32    
224    -352   
256    336    
-704   -1440  
240    -384   
432    80     
-288   192    
128    -96    
0      288    
-256   -336   
768    592    
-96    -64    
-784   -544   
528    -288   
-256   -160   
-384   80     
624    -160   
128    64     
-176   -688   
-112   -16    
608    64     
-192   128    
-144   48     
176    32     
-368   -272   
16     288    
400    -96    
-64    -16    
-16    -272   
-176   16     
336    -96    
-96    -96    
384    -128   
-336   -144   
96     96     
224    -96    
-208   240    
368    -128   
-192   96     
-960   -2048  
336    -304   
32     -192   
-944   16     
288    32     
528    -16    
-608   48     
-480   80     
496    304    
48     -96    
96     32     
-160   -464   
48     160    
64     80     
-160   112    
208    208    
-80    -160   
-80    0      
-48    48     
-96    32     
-80    -160   
400    544    
112    -224   
-1184  -32    
1120   -304   
-464   0      
-176   -912   
288    32     
-352   -960   
672    -144   
-16    160    
-320   -48    
96     64     
128    -160   
-48    -80    
-240   176    
112    -16    
32     304    
-144   352    
-320   -368   
-16    -32    
240    -160   
-224   160    
-48    -384   
320    -32    
-672   112    
384    -48    
192    352    
384    -224   
-320   112    
144    112    
96     -48    
-112   -96    
-288   80     
288    160    
-160   80     
128    -256   
-16    112    
368    -224   
-144   0      
-304   48     
464    -16    
-80    0      
-48    16     
-128   -256   
0      -144   
32     224    
-176   -16    
-192   -16    
128    -16    
96     -656   
-784   -4048  
-1392  -1184  
1488   -688   
0      112    
144    352    
16     272    
-672   192    
320    -112   
480    -112   
-240   0      
-320   -112   
-64    -16    
208    208    
176    -192   
-448   352    
-192   -256   
288    224    
-624   -32    
-432   416    
-16    656    
-1056  48     
64     -112   
-304   -368   
-64    176    
192    -208   
-80    384    
448    -208   
-272   -288   
-416   -144   
176    544    
112    416    
96     -928   
-128   -64    
-336   304    
-112   304    
48     -48    
-480   -528   
-112   -608   
368    -240   
-176   448    
-64    176    
-96    -192   
208    48     
-288   -16    
64     864    
416    -304   
-752   -944   
288    -528   
256    544    
-176   704    
-64    80     
128    544    
-288   64     
-272   304    
-320   448    
-608   752    
-224   928    
160    496    
-144   -336   
48     464    
-112   -272   
-160   -256   
48     48     
16     112    
-176   -32    
-192   272    
-112   256    
-336   48     
-112   -32    
-352   -16    
208    -32    
-240   128    
192    96     
-208   -128   
48     240    
-32    -272   
-144   48     
128    128    
-176   336    
256    128    
-416   64     
-496   -256   
784    -336   
-32    512    
144    -272   
-464   320    
-1072  -416   
496    64     
-320   96     
-160   288    
128    32     
144    -80    
32     176    
112    112    
-416   48     
544    -224   
48     528    
0      464    
32     320    
-400   16     
48     288    
-208   -32    
480    -384   
-112   384    
480    -96    
-208   -16    
-16    272    
0      320    
64     1104   
96     352    
-368   -352   
-48    -144   
352    128    
-176   224    
-352   -240   
192    96     
-176   -96    
-176   400    
-112   208    
-80    336    
-240   -64    
64     -32    
-32    -80    
64     -320   
48     -96    
128    -304   
-48    304    
-16    -208   
-48    -128   
48     160    
80     496    
1216   1536   
-1008  1456   
-1392  448    
752    320    
-64    656    
-384   368    
-96    192    
-160   1040   
368    640    
208    -1392  
-480   -272   
32     368    
544    48     
-416   160    
-48    240    
-64    96     
32     -80    
208    432    
48     368    
-112   336    
32     0      
-384   -1008  
96     -368   
576    272    
-944   -80    
368    368    
112    1264   
720    1248   
-560   256    
64     -80    
304    -48    
-160   176    
-96    112    
-48    256    
480    336    
-320   -64    
-16    128    
96     -128   
256    288    
192    64     
16     160    
-240   0      
-96    16     
-496   -368   
-224   224    
64     272    
528    -144   
-16    96     
-144   224    
80     48     
-32    640    
688    -96    
-352   96     
-80    0      
288    -160   
112    160    
48     -272   
-928   -576   
464    -480   
592    432    
-336   -48    
-80    64     
256    -80    
48     -128   
496    288    
-128   -176   
64     -16    
592    128    
128    144    
-464   -528   
880    32     
-1232  592    
112    208    
-288   -160   
-368   -32    
1088   208    
48     336    
-464   176    
-192   144    
416    80     
288    -144   
128    112    
-160   -80    
-144   112    
272    -96    
192    272    
-368   -80    
-208   224    
176    -80    
192    576    
-64    -192   
-208   496    
608    -96    
-480   160    
416    -16    
176    -48    
368    -112   
-272   -176   
-96    16     
288    304    
-256   224    
560    48     
-192   224    
-112   -48    
-80    -432   
176    240    
224    144    
-160   0      
-176   -608   
-320   -16    
80     -80    
64     160    
464    128    
-480   112    
-80    336    
0      112    
-48    -16    
384    -112   
-544   -160   
144    -304   
112    -224   
-192   -192   
128    -144   
160    96     
464    -48    
-464   160    
832    352    
-496   288    
-16    640    
928    240    
-208   320    
16     48     
-176   96     
176    80     
144    -288   
48     496    
288    -1952  
-176   144    
80     -16    
128    368    
224    336    
96     96     
-304   64     
64     112    
128    64     
16     48     
48     16     
192    112    
-192   176    
240    -80    
-16    288    
80     -336   
192    -1584  
-1904  1968   
1600   16     
-368   176    
224    64     
-240   -592   
-400   160    
48     -320   
240    -208   
272    256    
-224   -64    
-48    32     
-16    -336   
112    128    
-128   -416   
80     256    
144    -1472  
-64    -80    
80     -208   
96     -48    
-400   -432   
880    272    
-400   96     
-128   64     
448    0      
-432   48     
272    16     
416    -32    
-320   208    
-160   -112   
64     0      
192    -176   
288    208    
-256   128    
-256   -192   
96     16     
400    0      
-432   -176   
240    176    
0      -16    
-96    0      
208    48     
-16    128    
-64    96     
320    -192   
-304   64     
-80    -96    
336    144    
0      0      
-192   224    
1088   1280   
-1184  528    
-1136  528    
1552   -112   
-528   -64    
-128   -352   
528    320    
-272   -816   
-240   -64    
272    -96    
128    176    
-288   -32    
-16    80     
0      -144   
400    16     
-544   -144   
352    192    
-160   -32    
-64    -288   
160    -48    
-176   -352   
-240   -400   
1056   -16    
-800   64     
320    -704   
192    112    
-384   176    
160    -80    
304    224    
288    112    
-144   -144   
-112   -368   
96     128    
112    -16    
112    -848   
-160   -288   
-32    560    
128    -96    
416    -16    
-128   272    
0      -80    
128    -144   
352    96     
-1104  352    
480    -416   
240    464    
-416   -192   
-192   -64    
256    -144   
112    -256   
0      0      
16     -320   
0      -144   
32     -576   
64     -80    
-80    -1264  
496    368    
-112   -384   
-736   192    
416    -128   
-816   -48    
208    -384   
192    0      
-976   -192   
208    144    
-16    -80    
288    128    
-720   272    
-208   144    
528    48     
-208   176    
224    784    
80     -640   
432    64     
1264   -448   
-800   -304   
-448   384    
1264   784    
-832   1104   
-208   -592   
176    -736   
-32    -144   
48     -80    
0      -400   
432    96     
112    -480   
-288   -336   
-336   -592   
-16    240    
-112   -160   
224    -864   
-176   -288   
-112   256    
128    384    
-272   -240   
-112   560    
288    1024   
32     944    
128    64     
-80    -112   
-176   -1440  
64     -272   
0      -96    
32     368    
240    240    
-48    272    
-64    256    
160    336    
0      848    
-192   160    
-304   -336   
384    96     
-160   192    
0      32     
-48    320    
-160   -144   
560    -688   
-16    -720   
-80    32     
-272   -48    
176    -496   
-128   496    
-192   -976   
672    720    
-336   656    
-16    960    
128    128    
256    -304   
288    -384   
-592   -656   
288    -704   
192    496    
32     -512   
-16    112    
-256   112    
-48    -224   
192    -80    
-224   -160   
-304   16     
240    304    
-32    112    
256    -224   
-528   -80    
64     -224   
96     96     
32     -192   
80     48     
48     -416   
-224   -176   
208    -368   
496    112    
-272   80     
0      0      
-688   672    
720    -336   
-672   16     
160    -48    
176    -64    
-224   144    
288    320    
-32    -288   
-192   -32    
192    -496   
128    -48    
48     -112   
-48    -16    
128    -16    
-64    -96    
112    -448   
144    -320   
96     -64    
128    80     
-272   -560   
768    -848   
-112   592    
-32    96     
-240   416    
-112   0      
48     -112   
-112   640    
16     640    
-368   80     
-128   -80    
400    176    
288    -80    
-288   192    
400    128    
-320   -528   
-112   -64    
112    976    
144    -368   
-352   -384   
176    -240   
208    512    
-80    144    
-144   -592   
-224   480    
16     -384   
-208   -272   
-16    560    
-224   -64    
256    -192   
-48    -512   
1680   -928   
-1824  112    
720    336    
816    1312   
-64    48     
-96    -448   
144    464    
96     -256   
-32    0      
-80    -32    
-32    240    
-576   -16    
80     352    
-208   96     
16     400    
160    -32    
128    16     
-224   -240   
0      -32    
96     48     
528    576    
-1952  672    
624    256    
544    -160   
-928   -240   
448    256    
-128   -272   
-592   336    
192    48     
48     80     
-192   -96    
-176   96     
32     -80    
416    144    
-80    80     
-272   16     
112    -128   
384    0      
-80    128    
-48    16     
-128   128    
-592   -448   
-32    128    
48     176    
-32    -128   
-128   -496   
288    96     
64     32     
-592   224    
272    128    
112    112    
-64    -176   
-80    0      
-192   176    
-240   32     
-48    176    
-32    -208   
352    16     
-832   -208   
-32    -208   
-48    -16    
64     240    
144    80     
-192   64     
-320   -16    
176    752    
1104   -80    
-912   -16    
0      352    
-672   416    
-816   -704   
-496   144    
-288   96     
304    -192   
736    288    
64     -96    
-1152  400    
416    16     
192    192    
0      -16    
0      96     
-304   0      
-208   320    
112    48     
32     176    
-160   -16    
-336   48     
240    96     
16     160    
624    -352   
-736   336    
672    0      
-624   96     
-416   -96    
384    112    
640    256    
-528   -224   
-240   112    
768    -96    
-448   96     
288    112    
-128   128    
128    -32    
-480   -160   
704    -112   
-336   -32    
-192   256    
112    272    
160    -64    
256    96     
-96    208    
-128   32     
128    272    
-16    -64    
-176   -48    
-128   32     
144    -176   
-240   -32    
64     -160   
-192   96     
16     176    
16     -192   
592    -320   
-608   176    
496    384    
-304   416    
48     96     
32     -528   
-320   -176   
112    -224   
-336   0      
304    -48    
80     -64    
-400   112    
-64    48     
160    144    
192    -832   
-176   -320   
-16    928    
-160   -48    
192    -16    
368    80     
-416   272    
-16    0      
160    32     
192    48     
-224   240    
112    -112   
-48    -192   
112    336    
112    192    
-1120  -1040  
1424   -912   
-304   -96    
-576   -272   
896    240    
-176   80     
-64    496    
-784   368    
368    -112   
160    192    
-144   -32    
-128   16     
-96    144    
480    -64    
-352   800    
208    -32    
-368   -240   
624    480    
-32    560    
-240   64     
432    928    
-1072  -224   
160    368    
992    -16    
-400   -32    
-208   64     
-112   352    
304    192    
-80    -176   
80     -272   
-192   224    
128    96     
-32    192    
224    -80    
-32    160    
-128   64     
0      16     
544    -48    
-272   32     
80     128    
-192   48     
80     -272   
128    112    
-16    128    
-96    16     
176    224    
-80    32     
-160   96     
224    144    
192    112    
-1200  208    
1072   512    
32     272    
-416   -112   
608    336    
32     -304   
-832   -384   
688    -224   
96     -800   
-192   0      
16     160    
224    208    
-256   96     
80     -80    
144    272    
-48    -48    
-96    16     
352    64     
192    -80    
-160   48     
96     144    
-336   -1184  
368    64     
816    -1232  
-1840  336    
432    336    
320    -208   
-896   384    
448    0      
-400   -240   
208    -160   
192    32     
-160   128    
-32    176    
256    -96    
144    64     
-320   -112   
112    -16    
-432   -1360  
96     128    
160    576    
320    160    
-448   -704   
416    -432   
-656   464    
480    48     
336    992    
-1264  864    
144    -128   
368    -256   
-192   176    
128    -320   
-384   -112   
128    -512   
32     -16    
416    -1728  
112    0      
-336   1104   
624    -256   
-288   -496   
-416   112    
-80    96     
144    192    
384    320    
-464   112    
-384   -592   
-16    -512   
656    -144   
-448   -16    
-304   176    
336    -528   
96     -1744  
-2560  -880   
1152   -592   
0      -288   
-144   128    
-640   480    
-192   1568   
352    640    
272    -368   
80     576    
-400   -336   
176    -224   
112    -448   
272    176    
32     -608   
-352   -224   
-272   -144   
32     128    
224    -288   
80     -144   
-128   -144   
-192   48     
128    -64    
128    -208   
-416   -416   
352    -1024  
80     608    
-16    1248   
336    -128   
48     80     
112    112    
-224   32     
-32    256    
48     96     
208    848    
-80    688    
-64    -208   
144    688    
208    208    
112    144    
64     -400   
-544   -192   
256    112    
224    -528   
112    48     
80     304    
-400   0      
240    -816   
160    -384   
-64    16     
-192   -560   
-384   -1120  
272    -1232  
240    -1264  
-160   -3104  
144    32     
48     496    
-64    -288   
144    320    
0      32     
144    -128   
-112   -96    
-32    -432   
144    64     
64     -64    
-256   -432   
192    -656   
528    224    
-304   272    
-160   -816   
-80    48     
-80    -1248  
16     0      
240    -256   
-320   80     
-128   352    
48     480    
-112   368    
-464   768    
-256   -176   
272    -416   
432    -448   
-992   -16    
-240   752    
416    512    
-112   256    
160    -1536  
176    -992   
-112   -624   
-80    240    
256    352    
-80    224    
32     -32    
-240   -304   
-176   192    
16     64     
-224   -464   
80     -320   
-208   -80    
-16    -320   
352    -208   
320    -848   
-592   176    
320    -1088  
272    48     
-384   -944   
48     -560   
16     -16    
-16    64     
-16    80     
64     176    
-208   -48    
-80    -464   
-256   64     
80     48     
16     384    
96     16     
48     240    
160    32     
-32    112    
-224   -352   
0      208    
224    -176   
-32    -16    
-80    160    
112    -176   
-320   160    
272    -112   
-416   80     
48     -432   
912    528    
-352   -48    
-2272  64     
2016   240    
-672   -144   
-528   -576   
880    -128   
-512   -128   
16     -224   
256    -144   
112    -224   
-112   80     
-224   -64    
-48    32     
-80    -112   
-720   48     
-144   -416   
-96    16     
256    -96    
160    128    
-16    -224   
-16    -80    
-368   -960   
-144   160    
464    -256   
-672   -112   
736    96     
-80    -32    
-320   80     
32     224    
-448   240    
336    -176   
144    176    
-208   -96    
32     176    
112    -752   
144    224    
464    -192   
-480   -144   
480    -160   
272    -176   
80     48     
48     64     
-528   64     
400    -496   
0      240    
320    -128   
-256   208    
-256   -288   
576    -80    
0      -256   
-16    -16    
-224   176    
-144   176    
-48    -96    
384    -96    
-256   64     
-704   64     
304    -64    
112    96     
176    480    
-560   -48    
-480   288    
32     -48    
544    64     
-144   -336   
-352   80     
464    -64    
-400   32     
240    -144   
480    192    
-1552  -112   
1952   160    
1088   368    
-1968  -784   
448    384    
656    -496   
-272   -304   
-352   128    
208    384    
-128   32     
-208   176    
-112   -176   
112    208    
336    32     
-192   -16    
128    144    
-560   192    
128    -16    
96     -144   
464    704    
-1024  32     
480    624    
672    -320   
-720   -16    
-192   128    
288    112    
-528   -208   
-64    288    
272    -384   
-752   208    
320    -192   
-1440  -48    
544    -96    
-432   48     
320    144    
-160   64     
-368   144    
96     128    
48     64     
96     -160   
208    80     
-256   16     
-32    32     
96     16     
0      0      
-176   80     
0      128    
-448   112    
-112   -16    
320    -128   
-336   16     
112    96     
-432   -400   
592    -256   
96     208    
48     32     
-960   320    
80     -32    
240    -336   
-96    -208   
-64    0      
-496   -80    
400    -32    
-128   -64    
-32    304    
-160   -48    
-64    64     
352    112    
-496   176    
176    -240   
-528   272    
112    64     
112    -144   
64     -144   
-304   -112   
-16    32     
-96    -448   
32     48     
112    240    
-224   224    
-64    -112   
96     -208   
-896   304    
1344   -992   
-1472  80     
128    -688   
528    624    
-48    160    
-576   -976   
-128   -448   
400    80     
-96    320    
-64    80     
-448   16     
48     192    
336    368    
-400   976    
208    192    
-384   -48    
48     -144   
176    0      
-64    384    
-240   -448   
16     -848   
-320   160    
1200   -448   
-912   288    
256    224    
-160   320    
64     64     
176    -144   
-48    0      
-240   224    
-400   -208   
576    -32    
-176   112    
-128   96     
112    416    
48     224    
-192   -352   
16     -208   
-304   0      
320    304    
-80    -128   
-32    -224   
-144   -64    
80     -48    
-16    128    
16     64     
32     64     
16     80     
32     32     
848    608    
-1984  -320   
320    -800   
-16    -32    
-560   128    
736    176    
-256   0      
-16    16     
-288   -160   
240    -144   
96     -272   
-208   -192   
-16    144    
336    80     
-480   -96    
-16    -160   
304    112    
-288   -400   
-160   112    
-112   -32    
-48    224    
384    -384   
-1952  1088   
1616   0      
-480   -96    
-704   -528   
400    -512   
288    928    
128    704    
-320   -528   
288    -320   
-64    128    
-288   32     
160    384    
-80    480    
144    704    
16     304    
64     576    
224    688    
-224   992    
400    224    
-208   208    
128    496    
-272   16     
352    -192   
-32    -336   
-704   144    
688    208    
288    1008   
-16    -112   
32     -192   
80     -64    
-384   -176   
272    -624   
-848   -944   
192    -400   
576    336    
-320   -176   
480    -480   
-112   -80    
-512   -240   
192    256    
-112   272    
-64    -128   
176    -32    
240    -304   
-320   448    
-480   480    
-48    128    
96     -128   
176    -112   
1072   2624   
-960   1536   
368    96     
1392   -240   
-656   544    
-768   1184   
288    -576   
96     -1840  
432    1584   
-256   -1056  
-272   224    
576    -144   
304    208    
-144   128    
-32    144    
256    80     
80     -48    
592    -368   
-160   -432   
-128   208    
160    544    
0      224    
32     -80    
32     -64    
80     -336   
-112   96     
256    256    
272    192    
-576   784    
16     352    
64     -176   
32     -16    
112    -240   
-160   -96    
-64    96     
352    304    
96     -416   
-272   -1200  
32     -240   
208    -1472  
-256   -304   
0      -2720  
48     -352   
224    -288   
-384   48     
0      288    
320    432    
144    144    
-640   -1488  
-32    80     
416    0      
464    848    
-880   -320   
-240   -224   
640    -256   
64     -368   
-272   -160   
-16    -352   
-128   208    
256    576    
96     -2032  
112    -464   
-272   432    
-48    480    
176    -192   
-64    -32    
-32    352    
192    464    
224    496    
-176   144    
96     -240   
32     -128   
-160   256    
304    -704   
-32    336    
-48    272    
320    448    
-224   64     
192    16     
448    -384   
48     32     
-32    -816   
-1232  736    
1152   -656   
128    -560   
96     1104   
0      672    
-192   272    
144    -896   
-32    288    
176    368    
48     -256   
-96    -48    
64     0      
-112   -272   
-160   -336   
64     -320   
240    -320   
96     112    
-96    64     
112    32     
32     -544   
176    2032   
208    -272   
-400   -336   
256    288    
112    -496   
-16    -592   
-288   -400   
240    -144   
144    -272   
0      272    
192    96     
128    32     
-176   16     
192    -16    
144    -16    
-208   240    
-128   -256   
192    144    
128    32     
-144   -992   
176    128    
-192   -1376  
-48    -368   
432    -192   
-512   -128   
192    -256   
-48    -1088  
224    -128   
128    -224   
-208   -864   
-1312  -320   
1232   -304   
224    144    
-704   -160   
16     -1168  
48     -240   
48     -160   
-224   -272   
208    144    
96     -560   
-336   -112   
304    -272   
-160   -32    
416    16     
-80    80     
-128   0      
384    48     
128    -752   
-128   48     
128    -80    
368    1136   
-1024  -448   
-384   -96    
352    64     
-528   -208   
160    560    
224    176    
-80    400    
48     -384   
48     -208   
160    -208   
-16    96     
80     48     
-96    208    
64     -48    
-64    96     
-32    -320   
-304   -688   
-192   -208   
384    144    
-48    80     
-96    -192   
368    -176   
-480   -688   
-880   -128   
912    208    
-208   -16    
-672   96     
288    16     
224    -176   
160    128    
-656   64     
-304   192    
256    -176   
-128   0      
176    -272   
-288   -128   
80     -256   
-224   -464   
464    64     
-336   -880   
16     160    
-16    176    
288    80     
32     16     
0      -160   
-128   288    
400    -112   
-288   96     
-1152  -3632  
1504   -2976  
-448   -160   
0      -848   
448    64     
-544   256    
32     -160   
-320   208    
560    -240   
288    -96    
-176   16     
-240   -16    
96     176    
640    -160   
-512   -64    
-80    -176   
-512   96     
192    -160   
-768   80     
528    -544   
-1120  -176   
560    -976   
-32    16     
256    -640   
432    80     
-448   48     
272    192    
160    320    
-192   64     
-32    352    
0      -96    
160    256    
-128   96     
-240   -32    
160    -144   
80     -112   
-192   -80    
144    240    
96     176    
-208   -192   
-128   16     
-32    -208   
-464   -96    
208    -192   
32     176    
48     80     
-112   -16    
160    -128   
-128   16     
176    400    
-80    576    
0      272    
96     16     
560    -704   
-544   -112   
-256   -48    
640    -16    
112    736    
-480   1328   
96     784    
112    -112   
-64    -16    
-16    -80    
-272   32     
64     -176   
112    48     
-816   -240   
-96    368    
80     16     
80     128    
-160   80     
-176   208    
-16    112    
-80    -80    
96     -48    
64     -144   
32     160    
-448   -272   
224    160    
160    208    
-128   224    
-368   -240   
1056   928    
32     832    
-384   -80    
96     176    
0      -32    
192    432    
-1600  -320   
112    992    
48     144    
-16    -32    
-32    -176   
-96    240    
-240   64     
80     112    
16     112    
-144   -160   
0      48     
144    64     
-240   464    
0      -48    
-240   -368   
80     -656   
-304   848    
272    -496   
128    352    
-112   -352   
128    128    
-16    144    
48     -272   
112    160    
-160   -368   
-48    -128   
176    -352   
160    272    
48     384    
336    -32    
-304   144    
-352   -768   
-32    448    
96     320    
-432   -352   
-32    304    
-144   144    
240    48     
16     -400   
-432   112    
-96    288    
192    -80    
416    -320   
-816   192    
-336   1536   
1744   160    
-592   -560   
-240   112    
512    -320   
-1152  -176   
336    -48    
48     240    
-400   112    
64     32     
0      224    
-80    368    
-64    -64    
352    32     
-160   -192   
-128   -16    
-192   48     
144    416    
-400   0      
160    304    
-672   -608   
1392   -16    
-1504  416    
-32    -544   
656    -576   
-176   208    
-144   -656   
160    -752   
224    -944   
-736   -432   
144    832    
192    704    
-48    32     
-240   -480   
-32    -192   
-416   -304   
64     -16    
96     -336   
-544   32     
96     160    
-80    -192   
16     -288   
144    176    
-144   32     
-800   -1056  
48     -384   
1008   1664   
-848   848    
0      288    
336    -32    
-368   -288   
176    -208   
-624   -368   
304    -240   
416    672    
-256   288    
256    48     
-416   -304   
496    928    
16     480    
-432   -304   
128    -272   
64     -144   
16     592    
128    -400   
272    720    
160    400    
-64    0      
144    0      
-160   144    
-144   144    
-544   2176   
1184   272    
-704   672    
-384   224    
800    1728   
-272   480    
-112   288    
-144   -176   
-288   -224   
224    -144   
192    384    
-176   368    
-192   -48    
192    -480   
400    80     
-48    368    
96     176    
48     480    
64     976    
64     384    
-64    128    
96     -112   
464    80     
-800   -336   
656    -816   
-96    512    
96     -64    
128    224    
80     576    
-32    1200   
-96    1184   
16     96     
-192   -832   
0      -400   
128    16     
64     -128   
-480   -400   
240    -224   
-64    -48    
-48    192    
-144   96     
128    -176   
-224   112    
-48    48     
32     912    
352    448    
-224   128    
-32    672    
384    448    
80     -192   
-128   -208   
-512   240    
560    -384   
176    -992   
-160   -544   
-768   -848   
112    -560   
-32    -160   
-96    -32    
96     -912   
-816   -688   
208    -288   
288    -160   
16     -192   
144    192    
-304   416    
352    -128   
-352   -160   
336    -1280  
-528   -32    
96     -224   
272    64     
-48    -80    
-192   16     
144    64     
192    400    
-48    432    
-176   -240   
-80    -1040  
-96    -352   
-400   -1360  
1184   -1776  
-528   736    
416    -1152  
-64    160    
-256   48     
496    0      
48     272    
128    16     
-208   224    
-32    64     
352    -80    
112    -32    
-160   192    
96     -192   
48     272    
176    -336   
96     208    
48     -208   
-176   -32    
256    80     
768    1600   
-1280  -368   
-480   608    
1424   -80    
-1040  -208   
0      -48    
112    320    
192    352    
-336   384    
16     -304   
96     96     
-48    32     
-160   -464   
192    160    
80     -32    
-32    320    
-288   -64    
64     176    
-64    32     
176    80     
-224   -48    
176    160    
-368   -16    
224    -16    
32     -32    
-144   -304   
64     144    
-160   -112   
304    128    
-512   -1824  
896    -1296  
144    -480   
-176   48     
416    -16    
-288   32     
-672   112    
656    -144   
192    32     
-240   16     
-144   112    
160    80     
240    96     
-16    -32    
-112   -144   
-576   -256   
688    96     
-320   -688   
240    80     
-64    -224   
0      32     
128    128    
-48    144    
-1296  512    
1568   688    
-1168  80     
-496   -112   
1360   64     
-896   -416   
160    -240   
96     -784   
48     32     
-16    -96    
0      128    
48     -16    
96     176    
-224   96     
64     48     
0      144    
400    -224   
-96    480    
0      48     
-176   -144   
656    -32    
112    -16    
-400   -112   
32     -208   
192    -1216  
560    -208   
-400   -208   
64     32     
192    96     
-96    256    
-144   384    
16     -656   
80     -80    
-208   -112   
672    160    
-208   -112   
720    160    
16     -192   
144    64     
-160   -32    
-112   32     
-32    -48    
192    144    
112    -160   
-416   -144   
32     -48    
96     -304   
160    256    
-1408  -1552  
2368   -3392  
-192   752    
-320   400    
-64    -96    
-96    208    
-32    -16    
544    176    
48     144    
-176   -1072  
-112   192    
688    -448   
-272   -640   
32     32     
-32    -304   
480    -272   
-304   -464   
-32    -256   
-64    176    
-32    -896   
-368   -1216  
160    -272   
-80    -432   
464    112    
640    -32    
-624   0      
-144   224    
528    -448   
-624   -320   
160    -512   
-48    -208   
-160   -304   
224    -304   
224    -384   
0      -272   
-240   -768   
208    -528   
-96    -128   
224    -96    
-96    -112   
-208   64     
16     -272   
-96    -640   
-400   -640   
-112   -272   
-208   512    
16     960    
480    -496   
-224   -1360  
-112   -272   
128    -352   
-32    -16    
-80    -784   
48     -64    
64     128    
-96    288    
48     -112   
160    384    
160    -16    
-368   176    
-80    176    
464    96     
64     112    
-112   -240   
64     336    
-48    -288   
304    240    
160    240    
-336   480    
-176   -128   
272    -448   
32     -304   
-64    -16    
-128   256    
-48    272    
-416   176    
208    336    
-96    64     
-16    592    
208    400    
48     -720   
96     64     
-704   -1200  
0      -528   
48     928    
-416   240    
176    -128   
112    -672   
96     -1488  
176    -224   
-288   -224   
272    16     
-320   256    
-112   112    
240    256    
112    -640   
-160   -32    
48     80     
32     272    
336    0      
48     64     
-64    -16    
272    -320   
-1168  80     
688    64     
224    368    
-144   480    
-304   -32    
16     -128   
192    -32    
160    -624   
-64    176    
-16    -192   
-112   -64    
64     -16    
144    -48    
-448   272    
368    112    
-608   304    
16     -192   
304    64     
-192   -144   
-320   -64    
272    -176   
176    64     
80     -112   
-48    -48    
176    -432   
-16    16     
176    128    
-144   -80    
-256   32     
624    -672   
-1984  -656   
80     -416   
-320   -208   
272    -752   
-160   0      
160    -304   
0      624    
-240   -128   
240    -352   
112    128    
-576   -304   
-288   352    
80     -144   
112    560    
112    -592   
-240   288    
-240   176    
544    848    
-176   -784   
192    176    
-1568  -368   
1376   -816   
-944   144    
256    1456   
288    720    
-768   256    
-384   -1248  
-144   1120   
784    1712   
-912   784    
128    208    
256    176    
-384   160    
-16    -288   
256    416    
192    -304   
-368   -416   
-432   -768   
144    -80    
80     -112   
80     272    
-48    -208   
-352   -400   
-32    80     
0      928    
112    1504   
304    864    
-432   80     
64     112    
288    144    
-464   -592   
48     -144   
272    128    
-384   688    
64     -96    
656    0      
256    2144   
-784   1632   
-384   112    
384    -544   
-240   48     
-336   -16    
-240   -720   
-128   -576   
176    -192   
-352   128    
304    208    
16     -400   
-80    80     
-192   144    
-864   2800   
176    336    
-496   272    
48     -432   
224    224    
656    1072   
-672   1328   
-576   -464   
1008   -64    
384    32     
-656   -112   
-352   208    
400    -112   
368    160    
-384   -144   
-272   304    
0      -64    
336    -64    
400    -1088  
-880   -1056  
-32    96     
-128   112    
112    480    
816    -96    
-816   -240   
-96    -64    
208    -64    
16     64     
-32    -48    
-64    -528   
-544   -256   
272    -96    
64     -144   
208    -240   
-64    -96    
-400   -48    
-192   -80    
400    128    
-560   80     
16     112    
-160   -32    
176    96     
-16    144    
-144   64     
496    256    
-528   -432   
176    -128   
288    624    
-448   448    
-160   272    
320    160    
-448   -1264  
-544   -320   
480    -224   
-80    -16    
192    176    
-160   0      
-192   208    
224    64     
-48    112    
-64    0      
-80    -160   
128    -320   
128    -128   
-304   -48    
-32    80     
0      -176   
96     208    
-384   176    
32     -208   
-64    224    
352    144    
-64    48     
-112   80     
-16    80     
-176   -512   
32     -416   
112    400    
-160   16     
128    176    
-176   -480   
1424   2000   
560    448    
-1152  80     
416    240    
-208   0      
-144   -224   
416    -112   
160    208    
-352   0      
112    0      
400    224    
-176   224    
-128   -96    
-32    -432   
80     304    
224    448    
-96    -96    
-224   -208   
112    96     
16     112    
48     -1184  
-880   464    
1088   32     
-256   560    
352    16     
-64    -64    
-288   224    
16     -160   
128    80     
272    16     
-112   80     
-80    144    
-16    112    
-128   -80    
352    96     
16     64     
32     176    
48     112    
96     112    
128    16     
-192   80     
-80    80     
-96    112    
304    176    
32     -48    
-512   176    
496    -224   
-336   208    
192    48     
400    672    
-608   432    
336    1216   
1248   384    
-576   -32    
-304   -32    
320    368    
-48    0      
-304   176    
288    -128   
-16    112    
-176   48     
96     80     
16     48     
32     128    
160    80     
-304   48     
256    128    
0      -64    
-48    80     
208    0      
-128   240    
-496   -96    
1904   128    
-880   -64    
-256   192    
944    -32    
-336   -1488  
-240   -192   
352    144    
96     224    
-240   64     
32     160    
400    192    
-176   -16    
-208   224    
464    80     
-144   16     
96     144    
-272   -112   
320    224    
144    64     
-112   -1744  
736    64     
-224   240    
-112   -64    
208    160    
32     176    
144    480    
640    -592   
-704   320    
496    240    
48     -128   
192    96     
80     96     
80     128    
96     -128   
256    -592   
48     288    
-336   224    
-192   112    
32     48     
304    64     
-192   16     
-32    16     
32     64     
64     -144   
-192   -80    
32     80     
-256   64     
656    672    
-112   672    
-2544  -1312  
1600   -32    
736    -560   
48     224    
-304   160    
-592   96     
1040   320    
-432   64     
0      240    
416    -96    
-288   256    
-96    16     
224    176    
-240   -144   
-64    224    
384    -80    
-160   224    
96     -320   
272    -112   
-96    -848   
-176   -128   
-48    64     
768    256    
-496   -176   
160    176    
416    -144   
-304   128    
416    -336   
-784   -1072  
224    -416   
208    -32    
-112   288    
-240   -432   
144    -448   
-112   -976   
96     192    
416    720    
0      -64    
-256   -80    
112    112    
144    -112   
-192   -144   
-32    256    
176    416    
160    688    
176    560    
-80    -192   
160    432    
0      672    
80     -336   
-128   112    
192    -352   
-592   -672   
336    -1008  
-608   -368   
192    -512   
48     -2048  
0      -1200  
80     832    
-48    272    
16     -240   
-16    -48    
144    272    
32     0      
-400   -688   
256    192    
256    192    
-16    320    
192    -416   
112    368    
-48    48     
80     -624   
0      64     
112    -368   
-224   -144   
144    -80    
128    432    
-80    -160   
32     -16    
96     -832   
-384   272    
64     768    
880    16     
-464   96     
-144   96     
544    -656   
-144   176    
240    32     
-112   16     
-192   224    
144    -208   
160    -16    
16     -112   
-112   64     
304    -64    
-64    -464   
400    -96    
-32    96     
64     224    
-208   64     
256    240    
-112   160    
144    -192   
624    -176   
-464   -1280  
-48    176    
192    240    
-64    352    
112    -144   
160    -208   
80     -240   
176    384    
-192   -48    
64     -112   
-256   352    
224    16     
-496   64     
64     -528   
128    592    
-64    -48    
-16    -320   
320    -1616  
96     0      
-176   48     
0      -272   
240    -432   
176    48     
32     -32    
432    208    
-400   432    
448    1488   
-752   -288   
-2272  -480   
1680   -1008  
-96    352    
-384   64     
96     64     
448    224    
288    -912   
-64    384    
272    80     
-144   80     
-48    -272   
160    -176   
-48    400    
-64    48     
48     -176   
-112   -400   
400    224    
160    480    
-80    -272   
-528   -2128  
336    -464   
736    -928   
-1040  992    
752    1184   
-160   656    
0      1024   
-992   1312   
400    976    
176    224    
-240   160    
208    -160   
-1216  -80    
-320   48     
-80    96     
320    -432   
160    896    
-384   -512   
-224   -160   
160    -224   
240    -48    
-224   -144   
-432   -576   
432    768    
176    496    
-160   560    
-816   400    
96     336    
-272   128    
16     176    
-48    -192   
-368   -128   
176    -336   
288    432    
-320   64     
624    -304   
-112   -144   
176    64     
512    112    
-576   80     
-272   32     
192    -48    
-128   -112   
304    -448   
-592   256    
576    32     
32     64     
240    -352   
-80    80     
-480   752    
-736   1424   
-96    480    
-624   -224   
-48    -384   
912    -16    
-464   64     
-64    160    
-784   80     
736    112    
-560   -144   
336    -320   
-352   -96    
32     -320   
384    -112   
-176   0      
0      32     
-144   -80    
-144   0      
880    448    
-832   -368   
-112   -912   
352    -512   
-304   -80    
128    128    
-32    -32    
-144   224    
272    0      
-752   64     
208    -32    
-32    368    
-672   -192   
-112   128    
96     -336   
48     -432   
-32    -32    
16     -144   
208    -192   
0      -128   
48     -272   
176    224    
-352   0      
64     16     
256    -80    
-208   -16    
-192   256    
16     -512   
-560   -224   
544    -176   
-128   336    
-240   112    
-112   304    
176    -672   
304    -560   
-480   112    
80     -144   
-352   -160   
80     -112   
-464   -240   
256    48     
64     48     
16     80     
-192   96     
-16    -80    
-16    -96    
-128   -48    
-32    16     
176    -96    
-32    -32    
-112   80     
48     640    
256    -288   
-432   -64    
80     48     
112    48     
-48    160    
96     128    
-192   336    
160    -432   
-32    -224   
-128   352    
-16    -16    
-1008  -2560  
-224   64     
1216   -208   
-1008  96     
480    448    
528    176    
-752   192    
-352   -112   
608    64     
-64    -128   
-176   -144   
-240   -16    
-32    208    
240    144    
-336   -16    
-64    -448   
128    288    
-256   -256   
272    -240   
48     112    
-336   -464   
544    -544   
-704   416    
576    32     
48     144    
-416   16     
32     144    
304    256    
144    -336   
-512   304    
160    -208   
48     160    
272    -32    
-192   80     
96     0      
-96    48     
32     544    
208    -32    
-304   336    
416    -80    
-112   64     
-16    -16    
32     96     
32     -64    
-112   112    
208    16     
-112   144    
-64    16     
-80    128    
64     96     
-336   -1616  
-1152  -1136  
1392   -416   
-1040  -160   
-144   0      
464    48     
208    48     
-576   768    
448    416    
272    64     
-16    -48    
-96    48     
-336   -16    
-80    -32    
272    240    
464    -32    
-528   256    
304    32     
-288   32     
-160   -64    
128    16     
-304   -432   
1056   496    
-816   64     
176    -240   
480    -128   
-608   160    
-80    -96    
224    -16    
640    128    
-368   112    
-224   112    
224    80     
-32    48     
32     -48    
256    224    
64     16     
-176   128    
16     16     
16     32     
-208   -112   
80     176    
-112   0      
448    0      
-1040  192    
1104   -80    
-32    160    
-704   160    
304    240    
384    -192   
-288   96     
-64    0      
0      16     
128    64     
80     -32    
-192   -160   
-336   -144   
176    -272   
144    368    
112    -80    
-304   0      
176    -96    
304    592    
-80    -256   
-512   160    
368    80     
128    752    
-48    144    
-272   0      
-176   128    
896    864    
1712   3024   
-2416  1776   
1392   192    
1424   -160   
-1296  -16    
-384   -48    
608    -16    
448    -688   
-272   256    
160    128    
-112   -32    
0      448    
-16    -16    
272    0      
-336   -208   
96     240    
48     -96    
208    -96    
-96    80     
192    784    
96     688    
-160   208    
128    -272   
-352   752    
-304   832    
128    144    
496    432    
128    512    
-176   1600   
-160   -496   
224    128    
256    96     
-256   400    
64     192    
-80    -16    
80     -256   
256    -64    
-192   64     
-432   128    
208    720    
-64    -80    
48     -112   
160    192    
-336   -144   
176    -992   
240    -1200  
0      368    
-32    192    
-64    640    
160    48     
208    160    
-256   128    
576    320    
0      832    
-112   1104   
320    224    
-32    -320   
576    224    
160    48     
-272   -368   
48     -1072  
128    224    
-96    -112   
160    272    
64     800    
-16    160    
128    -80    
-320   144    
112    176    
400    96     
-288   -32    
48     112    
32     48     
208    -112   
32     144    
96     -192   
80     96     
-96    80     
-256   80     
208    304    
-32    160    
-192   -112   
544    256    
304    576    
64     -176   
-368   592    
-160   208    
240    160    
-336   80     
80     64     
192    -368   
160    16     
0      -112   
144    112    
-128   32     
288    -112   
128    -144   
-144   288    
80     -176   
-128   -144   
64     64     
-16    144    
416    528    
208    -208   
-464   -16    
16     208    
192    160    
-48    -1824  
-96    -272   
208    560    
-16    352    
-64    176    
16     0      
272    -192   
32     112    
-144   96     
208    224    
0      224    
64     -32    
-176   608    
416    -944   
-208   -544   
0      -144   
192    48     
304    -240   
-400   160    
-256   0      
224    240    
192    -32    
-464   -192   
624    -128   
-352   -1216  
2112   -976   
-912   352    
240    112    
208    -960   
-224   448    
16     64     
608    -144   
-144   1136   
-256   160    
48     656    
512    -288   
-64    -32    
-128   32     
-240   336    
400    80     
-48    144    
-32    -976   
-240   32     
432    176    
-144   -112   
576    1472   
-1008  -608   
-816   288    
688    -1344  
-1552  -816   
528    -640   
96     -1056  
-112   288    
368    496    
-128   -80    
32     128    
-64    -128   
0      -80    
512    -224   
-112   112    
-256   -272   
288    -208   
32     32     
144    64     
144    96     
-496   -224   
0      -176   
880    -208   
-752   -560   
-16    -272   
80     -1072  
-432   -224   
368    -496   
512    32     
-32    256    
-208   -352   
-192   80     
128    32     
-16    64     
560    128    
336    416    
-880   368    
-240   96     
-480   464    
-176   -64    
208    0      
-96    -144   
176    -368   
208    -80    
-128   -64    
144    -224   
320    32     
96     112    
-176   -112   
-352   -1392  
32     -4288  
-1664  -1984  
784    176    
-368   64     
496    -48    
112    -80    
-416   -160   
96     224    
-48    -128   
512    -128   
-48    -48    
240    -128   
-208   144    
-64    -208   
240    16     
144    128    
-448   -16    
176    0      
96     0      
-112   -768   
-560   112    
544    -96    
-208   320    
-672   -256   
-16    -240   
1104   -96    
-864   -16    
80     64     
144    224    
304    -112   
128    160    
-160   -144   
-192   128    
528    -272   
-992   16     
272    -256   
-304   96     
736    64     
-208   -272   
-768   -720   
560    -48    
-96    -1968  
208    48     
-48    -128   
-528   -64    
352    -144   
-416   16     
160    -16    
-432   -144   
-192   32     
304    -16    
-1152  -128   
384    -64    
368    -528   
-368   -320   
352    320    
-112   176    
-240   272    
208    -96    
64     -176   
-320   -16    
-96    -16    
160    -32    
144    64     
-80    160    
-16    -144   
-80    128    
-320   112    
496    704    
-192   -160   
-96    96     
256    -528   
-96    336    
-224   -1056  
224    -128   
208    16     
-96    -192   
-384   -288   
352    32     
-96    272    
-128   -96    
-224   -2320  
-1408  1728   
1664   80     
-624   32     
304    -64    
320    32     
-704   160    
-352   -256   
928    -16    
-224   416    
-368   -176   
-32    208    
96     160    
160    -304   
-272   368    
80     176    
-368   -48    
256    -128   
256    -64    
-256   112    
-208   -416   
80     -688   
-448   480    
864    64     
-224   -112   
-240   16     
160    256    
0      -160   
0      64     
96     192    
-16    96     
-96    -144   
208    224    
-720   -112   
-208   128    
304    -160   
-400   0      
-96    -144   
0      -240   
-192   -48    
192    -48    
0      96     
-80    -16    
-64    96     
16     -368   
112    -80    
-656   -432   
-32    192    
32     -64    
64     176    
-768   -2016  
-2480  288    
2368   -64    
-176   -128   
-848   -128   
-48    64     
288    304    
-1056  192    
80     384    
-16    -192   
-96    176    
-160   -32    
0      80     
-48    -64    
432    160    
-704   -224   
160    -48    
-64    208    
144    -208   
64     16     
-528   -192   
624    400    
-2048  272    
880    624    
-80    -144   
-384   -608   
160    -464   
-336   416    
-48    -144   
-48    64     
32     -32    
48     -16    
32     416    
128    32     
0      112    
0      -176   
-528   144    
336    208    
-272   -32    
-256   -304   
304    160    
-352   -112   
128    480    
-576   224    
-48    -320   
-48    416    
384    -208   
784    -64    
-384   176    
224    288    
-400   80     
-144   0      
16     48     
-48    288    
-352   -96    
256    416    
-544   -80    
-112   -352   
496    64     
-64    224    
-592   -768   
256    80     
160    96     
-336   -272   
288    144    
-128   -144   
464    224    
16     128    
336    128    
-576   128    
-176   96     
-592   -2720  
-1568  -960   
976    -48    
176    -272   
-144   -496   
-272   -592   
-16    224    
-480   -400   
624    -1056  
-240   -32    
-304   352    
-128   -400   
112    160    
176    -128   
-176   432    
-208   864    
224    -176   
-176   -48    
80     -272   
48     384    
-48    496    
-48    -288   
112    96     
400    -240   
-592   -112   
240    -144   
-784   -608   
256    -576   
-320   -368   
176    -64    
-432   0      
32     192    
128    576    
256    512    
-448   80     
-144   -832   
64     -64    
16     -64    
288    640    
-224   592    
-48    -48    
176    320    
128    176    
-192   80     
112    192    
-144   -544   
-176   112    
640    112    
-336   736    
-64    -48    
128    0      
-480   112    
880    -512   
16     -208   
-16    16     
-80    -1008  
416    48     
384    1264   
-208   320    
64     -592   
64     240    
32     624    
-48    -64    
-96    80     
-208   336    
224    304    
208    208    
0      112    
240    -256   
96     48     
-112   32     
0      -96    
144    208    
-128   160    
-64    -80    
144    -48    
-48    288    
-80    304    
304    144    
-64    224    
-16    80     
720    352    
-1024  704    
512    -112   
-160   192    
112    224    
-160   560    
0      256    
-384   256    
-48    464    
-160   48     
-160   -320   
-48    -16    
176    16     
-160   240    
-80    96     
240    0      
-16    -160   
-192   -128   
64     128    
144    96     
-400   -224   
448    -96    
-688   -48    
-368   -480   
1024   -768   
336    32     
-112   224    
-400   -240   
-16    464    
352    304    
304    -304   
-592   -160   
-192   544    
240    -208   
144    352    
128    32     
-384   -416   
160    448    
176    -400   
192    432    
-192   -96    
-160   272    
176    112    
-32    256    
96     224    
80     240    
-272   -80    
304    16     
0      176    
-64    32     
-1248  1520   
2320   -48    
-560   160    
-128   -864   
544    -208   
-368   224    
304    320    
-160   240    
208    128    
-224   192    
560    272    
-288   160    
-96    32     
128    112    
496    176    
-176   48     
-144   160    
272    416    
-32    -176   
-48    -64    
48     128    
80     -416   
-1184  992    
960    160    
240    192    
-112   -496   
-336   -128   
528    512    
-1136  80     
464    -64    
320    32     
-576   64     
192    0      
112    0      
-96    16     
384    112    
-208   128    
16     96     
-112   80     
-48    80     
528    -80    
-192   -240   
432    -16    
-112   256    
208    -240   
-208   176    
96     -528   
1104   208    
1056   560    
-304   48     
-912   -64    
416    112    
320    64     
-48    192    
-384   -736   
-432   -416   
112    -688   
464    128    
-560   -32    
-576   528    
720    352    
176    -192   
-320   -112   
-32    64     
352    64     
128    -48    
-672   -64    
-48    -2112  
528    192    
-688   -576   
336    -1440  
2400   -2560  
-464   -256   
-368   -816   
240    32     
448    144    
-224   -256   
192    208    
112    -64    
-304   -192   
208    -816   
48     64     
-96    -368   
416    336    
112    -80    
-64    240    
-240   16     
256    144    
256    -64    
-368   -400   
-640   -32    
672    -672   
-304   96     
352    -992   
256    80     
192    -96    
-64    -32    
352    48     
-64    -48    
-64    16     
48     208    
-304   16     
480    208    
-464   -16    
192    -368   
-144   352    
672    64     
-720   160    
432    304    
160    48     
-192   96     
336    -32    
-720   -432   
272    160    
256    160    
-32    176    
64     64     
80     -608   
272    112    
-304   -304   
336    -976   
-320   -240   
176    176    
-1008  224    
544    -208   
-80    -336   
-160   -16    
320    432    
352    -1056  
16     -160   
-160   96     
96     64     
-336   -352   
-112   -464   
112    -160   
-16    -1056  
-64    32     
48     -1152  
-48    -224   
160    -112   
-288   0      
224    240    
560    -48    
-272   -528   
-304   144    
176    -208   
288    80     
-144   64     
-288   128    
-16    240    
128    64     
128    96     
32     1424   
2336   -720   
-1968  -304   
64     -256   
928    64     
-192   304    
-256   -160   
-304   -880   
448    -784   
-80    576    
-176   -48    
112    112    
-272   -16    
272    -288   
-304   608    
112    -496   
-256   -144   
176    -784   
-160   -16    
224    -64    
592    768    
-1552  496    
784    -320   
384    -352   
-272   112    
80     64     
-448   -272   
144    -688   
0      96     
224    -208   
-32    -64    
-112   96     
160    -608   
-240   64     
64     -1088  
-160   144    
240    -80    
-64    176    
80     0      
-176   16     
-32    80     
-64    16     
-400   -64    
64     80     
-48    80     
304    48     
-384   160    
160    -352   
16     176    
224    -752   
-992   -1104  
-304   80     
1632   -224   
-1744  -432   
240    -80    
576    -48    
-544   -32    
48     352    
-256   64     
48     304    
192    -208   
-336   -64    
64     -496   
64     112    
272    -320   
-240   144    
176    64     
-96    -96    
160    -16    
-176   -96    
32     240    
-176   416    
1792   -240   
-528   512    
240    464    
224    496    
336    736    
-96    400    
-352   160    
16     -672   
224    432    
320    48     
-208   16     
-208   96     
464    -48    
320    -16    
-448   48     
64     -112   
-416   176    
-528   96     
240    -144   
-64    32     
-80    -144   
-128   64     
-80    -112   
320    320    
-656   384    
-544   -640   
320    -1088  
176    32     
-688   -16    
224    -128   
-256   336    
80     -160   
576    272    
368    32     
-448   448    
144    -1088  
-288   64     
224    -336   
96     16     
-48    -176   
-720   -176   
-160   -80    
96     64     
-320   -368   
640    -928   
96     -112   
48     -400   
-208   -416   
-704   -288   
1120   2864   
-2048  480    
448    832    
1184   496    
-992   1024   
-80    -720   
416    -96    
128    672    
-1008  -320   
-64    96     
0      16     
112    544    
128    -160   
32     -320   
-320   384    
144    -224   
-528   -224   
128    192    
-352   48     
224    288    
-160   1072   
-144   -576   
432    112    
0      -16    
-368   -416   
-528   -144   
160    1328   
-400   -992   
592    -192   
96     112    
-400   -336   
48     480    
272    -496   
112    -144   
-256   -32    
0      -432   
-32    -208   
112    352    
-352   736    
-16    -32    
-816   -400   
416    192    
-240   128    
-192   -16    
128    528    
96     688    
-48    -784   
112    496    
-80    864    
48     48     
-64    48     
672    400    
-1008  1088   
96     416    
64     -368   
64     144    
32     288    
-416   352    
208    208    
-48    224    
352    -16    
-64    -64    
-464   -64    
64     16     
416    32     
-112   -80    
-32    -176   
80     160    
-16    -304   
784    128    
-32    272    
-80    -32    
-336   112    
176    -112   
-112   224    
32     1120   
-96    512    
-48    736    
-208   592    
-80    -80    
320    -176   
384    1328   
-1712  976    
624    -592   
272    -944   
-208   -368   
432    -208   
-640   -992   
192    640    
-128   816    
0      192    
-96    -128   
-128   0      
144    480    
80     -288   
16     224    
-64    -96    
-176   -32    
192    160    
112    80     
-416   -80    
160    912    
-544   -592   
448    -752   
64     -320   
-336   -16    
0      576    
304    -112   
128    208    
-160   -80    
-128   240    
96     576    
160    272    
-272   -208   
-112   288    
32     -144   
-16    160    
-48    -288   
-176   -112   
-224   -64    
-128   -160   
16     96     
96     64     
144    16     
-48    304    
128    256    
-336   160    
-112   64     
224    -32    
-64    192    
-320   96     
-80    -1568  
-1072  -160   
1056   -112   
-912   64     
320    256    
528    32     
-400   64     
112    -32    
64     16     
-208   -16    
0      112    
128    64     
192    128    
-240   -112   
-256   128    
480    -64    
-432   48     
224    176    
160    240    
80     96     
-128   160    
48     -576   
1232   736    
-608   -224   
-432   48     
960    80     
-784   224    
128    48     
368    -240   
-720   144    
480    304    
-480   16     
144    64     
112    48     
240    144    
-32    96     
-368   80     
160    16     
32     -160   
16     96     
304    0      
-144   176    
-512   -112   
912    32     
-448   112    
-96    -192   
224    144    
-464   208    
304    -80    
512    576    
336    384    
-688   -64    
-128   144    
384    -80    
-192   32     
144    480    
0      64     
160    192    
64     448    
-32    144    
-80    224    
-128   0      
-208   160    
16     176    
192    -48    
0      320    
96     -80    
-272   496    
-544   112    
208    144    
-480   -160   
-496   3680   
240    512    
-1024  -368   
480    -592   
304    64     
192    384    
-832   -112   
80     80     
784    320    
336    144    
-272   -144   
-96    224    
144    96     
160    192    
0      96     
-192   128    
-80    112    
128    48     
-192   -336   
752    -1840  
-608   208    
720    -1728  
-480   144    
368    224    
-64    80     
-480   -16    
896    -352   
-384   16     
208    -16    
-96    160    
160    112    
32     16     
272    128    
-208   -32    
-32    48     
160    -128   
-160   -144   
752    112    
-96    224    
112    192    
-32    80     
208    352    
0      112    
272    -112   
-368   240    
256    256    
-112   288    
256    160    
-224   176    
256    192    
-80    176    
336    96     
-256   112    
-224   -2416  
336    0      
-96    144    
64     16     
-64    -144   
240    496    
384    80     
-16    96     
-224   96     
272    160    
64     336    
32     192    
80     416    
176    224    
272    -16    
-288   -928   
208    -800   
-48    -672   
-144   -48    
32     352    
432    80     
-112   160    
-128   16     
-128   -192   
144    -1040  
-32    -192   
-16    -144   
0      144    
-80    1232   
2144   -1024  
-1712  400    
352    624    
800    -448   
-48    -160   
-400   80     
64     -32    
288    -272   
144    208    
0      0      
-240   112    
-64    -64    
288    128    
80     448    
-128   64     
0      -416   
32     -416   
208    176    
-48    -48    
544    672    
-608   1504   
240    352    
-96    -496   
-240   -640   
224    304    
176    672    
-96    48     
-16    -320   
128    -112   
-16    64     
64     336    
112    -224   
-112   144    
-176   -512   
176    336    
128    320    
-48    48     
0      112    
240    -16    
-16    224    
-240   -272   
144    240    
224    64     
16     0      
-16    -16    
-16    64     
192    208    
80     224    
-208   96     
-144   -1472  
-848   -288   
928    -832   
-976   400    
416    -176   
176    -656   
-768   752    
640    1632   
64     -608   
-192   -672   
176    -144   
-16    144    
80     -224   
-96    -288   
-80    288    
448    -640   
-96    128    
-32    528    
464    736    
-128   -48    
-112   -560   
368    848    
1536   -240   
-720   128    
-656   640    
752    -208   
-240   272    
144    1072   
400    0      
0      624    
-224   -64    
384    48     
176    -208   
48     -192   
-240   256    
368    256    
80     128    
80     608    
160    1344   
96     784    
208    -416   
32     -160   
-96    -480   
400    992    
-592   1360   
80     128    
-144   -144   
528    1040   
-752   -176   
16     -1312  
528    -1440  
-592   448    
288    432    
336    336    
-496   -1440  
-320   128    
128    -80    
0      976    
848    528    
-272   272    
448    96     
-192   560    
-240   256    
-16    -128   
272    -80    
-160   240    
-176   192    
-208   -48    
-48    416    
656    464    
32     -112   
-496   -2128  
-1632  688    
896    -1584  
160    224    
544    864    
-608   208    
-400   -816   
592    -768   
224    1136   
416    -256   
-496   -208   
-192   -336   
464    -160   
64     16     
-112   144    
112    -192   
112    320    
-240   -1536  
32     -208   
96     -80    
16     368    
-112   -80    
48     0      
272    -288   
-464   -48    
96     -112   
-432   -592   
-640   -288   
592    800    
-32    336    
-112   -672   
-48    -48    
-240   -400   
208    112    
272    -80    
-208   -112   
-96    -192   
256    -48    
208    944    
-64    640    
-96    48     
-80    -160   
48     -48    
160    -32    
-96    -480   
-144   720    
256    704    
-160   432    
0      352    
-16    -432   
112    -400   
-304   1168   
1040   208    
-208   32     
-176   608    
560    144    
32     128    
-304   944    
272    848    
80     80     
-128   -288   
96     -368   
160    -624   
-144   16     
80     32     
0      272    
-80    -16    
128    -304   
464    96     
-448   -80    
0      208    
240    112    
-128   32     
240    160    
0      192    
-1328  -304   
192    -128   
-992   -1008  
-144   208    
-48    416    
-784   -608   
1088   -1056  
-608   80     
432    -816   
-32    416    
-240   608    
384    976    
-144   960    
-624   -336   
-288   0      
-16    -128   
160    144    
-176   -80    
-96    176    
-128   16     
-144   -288   
144    -640   
-640   -624   
-224   -352   
-208   48     
96     192    
-176   -1024  
544    -192   
-352   16     
96     368    
400    144    
-144   688    
240    32     
-272   -192   
-144   64     
208    -128   
-96    32     
-288   304    
80     80     
-288   -80    
32     80     
-144   -320   
-192   384    
-48    -192   
-16    256    
352    -208   
-304   160    
96     144    
-144   0      
272    304    
128    160    
-624   64     
128    320    
208    0      
-336   -448   
-784   -1536  
2672   1360   
512    -496   
-1632  -272   
1296   32     
0      -240   
-1248  144    
432    320    
272    -64    
-496   128    
64     64     
112    128    
-64    80     
64     112    
80     224    
-240   112    
-240   64     
-32    48     
-272   -64    
80     -112   
192    -496   
-160   128    
-560   -288   
1872   32     
-176   448    
-944   0      
-384   304    
704    80     
-288   320    
-96    192    
96     -80    
-48    -144   
-96    96     
-1216  -112   
464    416    
-656   128    
48     16     
400    208    
-608   416    
304    432    
-240   192    
64     64     
128    -192   
416    -128   
-816   96     
1120   -128   
-352   -608   
-192   -400   
80     -416   
-256   80     
48     -192   
272    96     
272    112    
-368   -144   
-288   -32    
-48    -192   
496    256    
-448   400    
-288   -944   
-48    -432   
64     672    
-208   64     
96     -112   
-80    192    
-192   64     
112    80     
-256   -352   
320    -32    
-192   224    
-480   48     
32     -176   
1632   -3664  
-3008  -1296  
1376   816    
0      -112   
-320   160    
496    -112   
-688   304    
-416   -48    
496    192    
656    16     
-560   32     
-256   144    
112    112    
272    224    
64     -240   
16     272    
-112   -80    
-64    272    
400    -80    
-480   608    
704    272    
-768   464    
448    -32    
96     208    
-368   160    
160    96     
-32    144    
64     80     
-64    -256   
-480   -368   
240    -192   
-32    128    
96     240    
-480   -176   
304    304    
-176   128    
208    400    
-464   -32    
-144   -32    
-96    -32    
32     -48    
32     64     
-16    -112   
-256   464    
144    368    
80     192    
-128   -32    
-112   32     
224    -96    
0      32     
-304   0      
176    256    
112    832    
576    64     
-496   -528   
320    -176   
-208   32     
-272   -416   
384    -896   
0      -272   
-544   224    
-16    176    
144    208    
80     160    
192    528    
-48    48     
64     -144   
96     80     
96     176    
-64    160    
-256   -256   
112    -352   
64     1520   
224    64     
-688   -288   
0      -128   
176    -256   
480    640    
-64    560    
-464   -528   
240    -592   
80     -400   
224    -1824  
-656   480    
784    672    
-464   160    
-160   752    
432    -656   
-160   -992   
272    800    
-288   -336   
224    288    
240    176    
-144   128    
-240   32     
64     192    
64     176    
32     -32    
64     112    
-64    416    
-32    16     
-144   -320   
800    -640   
-208   400    
-368   -688   
336    -304   
16     176    
464    112    
-560   -720   
-224   -336   
-16    80     
96     -464   
32     272    
-64    -512   
48     272    
272    -256   
176    32     
48     96     
-80    352    
-176   480    
544    -640   
-48    -368   
-416   320    
-16    64     
192    192    
-96    -64    
224    -480   
-112   176    
80     -128   
128    96     
-144   192    
-624   -560   
1600   -320   
1008   384    
-1728  -928   
864    -832   
0      -192   
-320   192    
672    240    
272    912    
-448   -544   
-32    -192   
304    0      
-16    -2000  
-48    128    
256    208    
16     0      
-16    64     
48     -32    
192    304    
16     0      
-144   64     
704    288    
-1600  1296   
288    -656   
464    -480   
-368   -640   
256    -16    
-512   -880   
-176   48     
480    352    
-16    1168   
-160   -32    
32     -496   
64     160    
-208   192    
352    -896   
-272   -576   
80     176    
-48    -320   
-464   64     
272    -352   
64     192    
-176   -528   
448    -704   
-272   -1104  
-576   -560   
112    -1008  
224    -176   
816    688    
640    384    
-400   -912   
48     -368   
160    -528   
-192   144    
-64    -576   
80     656    
848    0      
48     -384   
640    272    
-16    48     
176    880    
432    352    
-160   96     
80     -320   
-128   -144   
208    304    
0      -128   
-352   64     
-272   -416   
80     -192   
-16    -368   
80     320    
736    -736   
-32    64     
720    384    
-1184  224    
-176   240    
880    -48    
-304   -1184  
-576   -1152  
192    688    
432    464    
192    -288   
-32    -448   
-624   -448   
224    208    
480    64     
-192   48     
-256   -192   
-352   -400   
624    -864   
224    720    
-128   -240   
0      144    
-1216  32     
192    -112   
176    -336   
-192   -512   
48     1216   
-64    432    
-160   80     
304    96     
16     80     
-96    -2272  
304    96     
-368   -48    
352    768    
-96    -176   
32     -96    
-576   416    
0      128    
272    256    
-64    -96    
-48    128    
128    0      
-368   32     
160    -336   
-192   -288   
96     -96    
-496   -656   
400    -192   
48     -64    
-480   -608   
688    -448   
-304   -96    
-848   -64    
496    -96    
-208   -192   
240    16     
288    -160   
0      304    
336    -1648  
-288   80     
80     64     
272    656    
-224   224    
96     128    
32     -496   
-400   -176   
192    -768   
-480   -240   
-64    -192   
432    32     
352    -16    
-448   -240   
32     32     
432    -144   
-144   -320   
-64    -320   
368    96     
-80    32     
16     176    
704    -1536  
-1744  1072   
1568   64     
-320   320    
304    -160   
-352   -64    
-304   -16    
-32    -192   
-144   128    
576    -464   
-464   192    
-128   -2016  
368    48     
48     128    
-288   -352   
-208   -464   
320    112    
48     -16    
-176   48     
128    -32    
-416   -480   
672    544    
-160   -16    
-560   -96    
848    -416   
-416   -256   
144    -656   
96     368    
192    0      
-256   176    
-64    -32    
272    -160   
-160   -144   
80     -32    
-352   -32    
-48    -16    
208    -128   
48     -224   
0      240    
64     -224   
-192   112    
416    0      
48     176    
144    -816   
-208   -256   
208    208    
-48    -240   
-336   240    
496    0      
-336   144    
192    -496   
-1104  -576   
448    -192   
304    224    
-400   -432   
-112   112    
944    -288   
-448   192    
128    96     
-48    -144   
240    80     
64     -112   
-432   144    
352    0      
-192   144    
-192   -64    
64     -80    
144    -64    
-480   112    
112    32     
144    112    
-832   -896   
720    128    
-1808  16     
-32    -272   
1664   112    
-1744  176    
352    352    
192    16     
-704   -128   
208    -64    
-32    112    
-176   -48    
-48    144    
-160   -224   
272    176    
-464   -112   
-48    48     
64     352    
-16    448    
-48    192    
-848   -48    
-64    -464   
-1120  336    
1120   48     
-720   -176   
-112   -160   
640    -336   
160    656    
-640   16     
96     96     
-384   112    
32     336    
96     160    
-128   0      
-592   -288   
528    -80    
80     320    
-832   384    
400    224    
-416   -288   
-176   112    
80     -272   
-112   112    
112    -48    
16     448    
-192   0      
-592   128    
320    -16    
-272   0      
336    192    
-688   2656   
1296   -464   
-1472  -32    
16     -112   
-16    -288   
-128   144    
-144   -80    
-48    384    
80     272    
-480   128    
96     -16    
352    48     
-528   -96    
112    32     
240    80     
208    16     
-272   144    
-256   -144   
208    656    
-160   1328   
208    1232   
272    64     
-384   -288   
48     -128   
528    -160   
-672   224    
544    -112   
-48    208    
-464   -16    
288    -176   
-144   -96    
96     -160   
-64    80     
144    48     
-448   -208   
-288   -96    
416    144    
-80    720    
224    96     
-288   112    
0      112    
304    64     
-896   -336   
448    320    
240    656    
-160   528    
576    1072   
-224   528    
144    -176   
-272   -560   
-112   256    
-640   -656   
-496   32     
784    592    
-688   528    
432    160    
320    704    
-80    2080   
-64    1952   
144    208    
-16    144    
144    304    
48     80     
-16    -112   
-432   -192   
256    512    
-176   -32    
96     -304   
80     208    
-160   48     
64     176    
-176   -672   
64     -224   
112    48     
224    160    
-80    368    
432    288    
-656   64     
368    16     
80     0      
-352   48     
512    592    
-912   880    
352    16     
80     -112   
48     48     
16     -176   
-384   352    
112    288    
-400   112    
-224   -352   
112    16     
-192   -160   
32     128    
-144   -48    
192    48     
-64    48     
-208   -48    
432    -64    
160    96     
-112   208    
-240   -352   
-288   224    
320    256    
-240   384    
160    -80    
-192   -144   
-64    -208   
80     -16    
160    96     
64     176    
-176   48     
-288   64     
80     64     
-16    448    
128    48     
-80    -96    
-128   0      
-144   -48    
144    32     
-64    -48    
-112   48     
-288   80     
112    224    
112    16     
-352   208    
112    112    
16     48     
-272   112    
352    96     
128    112    
-1520  1344   
2496   -592   
-592   64     
-672   -304   
800    -272   
544    -176   
-816   448    
672    -544   
-464   -1120  
-208   352    
208    624    
176    -272   
-176   448    
144    112    
128    0      
16     -48    
-48    240    
240    464    
144    32     
-192   -48    
672    1296   
-32    -1024  
-1472  544    
1392   592    
-624   928    
-224   576    
832    1072   
128    1600   
48     1008   
32     -608   
-272   -64    
144    176    
128    160    
16     256    
-64    96     
-160   -32    
48     -272   
-208   -464   
-224   -320   
176    -464   
-224   -112   
160    80     
-96    -208   
416    -416   
16     64     
-160   1360   
512    528    
352    1888   
992    1264   
-832   -48    
224    208    
224    -32    
-64    176    
384    -160   
304    192    
-992   192    
176    96     
352    736    
128    272    
352    800    
-816   848    
224    -144   
528    224    
-464   304    
-272   -112   
-384   -160   
624    -352   
240    -32    
-1104  -624   
256    -800   
1776   3008   
-1584  1808   
816    -288   
1392   272    
-1024  2224   
224    400    
80     144    
-160   -832   
240    -416   
112    -320   
32     0      
128    352    
16     -288   
336    -80    
-176   -304   
96     160    
96     192    
-320   64     
272    992    
336    2016   
-272   992    
400    48     
-32    -304   
-528   272    
-336   16     
864    -96    
-32    464    
-112   400    
32     496    
-48    -144   
128    96     
-32    -192   
160    64     
-192   -496   
-256   -32    
-112   -192   
544    -304   
16     -624   
-544   -96    
208    32     
96     -224   
368    -80    
-336   -432   
-208   16     
208    -208   
-80    112    
240    -464   
416    512    
-336   -288   
-48    224    
240    -64    
-16    -32    
224    -448   
-352   256    
272    304    
448    -64    
-656   208    
176    -112   
320    80     
-48    48     
400    -32    
-416   -144   
208    240    
224    -96    
-240   112    
160    368    
32     -48    
-32    304    
-16    -80    
288    -512   
-272   96     
-160   128    
336    -832   
16     128    
48     0      
-48    112    
-96    -832   
64     -96    
48     -64    
32     128    
128    128    
-304   -2720  
-1552  1040   
1744   160    
-592   208    
400    -144   
176    -112   
-320   -400   
-384   64     
544    -16    
320    112    
-336   -192   
-304   240    
144    -336   
432    80     
-528   384    
160    -832   
48     208    
-288   160    
80     -896   
128    -80    
480    560    
-1104  -400   
-160   160    
1392   -96    
-592   -160   
32     368    
-128   128    
96     16     
208    -1440  
48     192    
-224   -304   
-144   -32    
-384   -16    
336    -96    
-48    -128   
-144   -304   
144    192    
144    -848   
64     -112   
-256   176    
144    48     
96     -160   
32     128    
-64    -336   
288    176    
-368   -128   
160    48     
-128   -32    
16     -496   
-336   -656   
-1296  -1808  
4752   1776   
96     -64    
-2176  -128   
1488   -2736  
80     -400   
-384   16     
-48    -640   
288    -48    
-176   64     
160    16     
304    -64    
-208   0      
-256   -176   
640    144    
144    16     
-304   32     
320    -16    
-32    -128   
112    -736   
128    144    
-80    -384   
-848   752    
976    -112   
-80    656    
352    32     
64     256    
64     -32    
-416   16     
64     224    
416    -272   
-128   160    
-16    -384   
-16    32     
112    -752   
16     80     
240    -736   
-208   128    
208    -240   
208    48     
-112   -32    
32     32     
-176   224    
1104   -112   
-960   48     
128    128    
256    -256   
48     144    
160    240    
-416   -160   
-224   80     
464    -1312  
-64    464    
256    -160   
272    272    
-848   256    
304    -112   
-32    176    
-288   32     
-64    -192   
-192   96     
-608   -48    
80     112    
96     16     
32     -224   
-176   -352   
80     32     
464    96     
-304   -16    
32     -176   
544    -1120  
96     -1264  
544    816    
784    -32    
-1632  -96    
-496   -336   
1152   -496   
-64    336    
-512   -336   
0      -336   
512    368    
16     -528   
-112   480    
192    -144   
-464   -32    
304    -400   
-192   80     
80     -208   
-160   240    
368    432    
-128   1104   
48     304    
0      -368   
400    -176   
-384   -272   
592    336    
-288   -16    
-208   320    
400    704    
160    944    
96     -416   
80     -464   
-272   -160   
144    560    
-144   -272   
304    -128   
-384   -144   
-80    -368   
336    176    
224    48     
-160   64     
240    48     
-1056  336    
-80    -16    
-256   304    
368    1216   
-96    784    
80     16     
656    448    
-336   112    
-32    -144   
-176   32     
-336   352    
1312   -128   
-816   240    
-32    576    
256    256    
0      432    
288    1600   
-272   1232   
272    -1072  
-336   608    
-160   -240   
144    192    
-272   -32    
-288   16     
224    80     
-336   -256   
0      16     
112    -560   
-32    208    
16     -16    
48     64     
208    48     
-112   48     
0      80     
-96    192    
224    208    
-240   -192   
112    -32    
-352   16     
144    128    
128    -736   
-416   96     
208    160    
-576   176    
240    96     
176    128    
32     -160   
-480   80     
-32    400    
-16    192    
384    -160   
-320   144    
-224   144    
64     -32    
176    240    
160    112    
-240   288    
-176   128    
128    0      
-128   -176   
608    -80    
96     192    
-896   -16    
432    -144   
-384   -144   
240    480    
-144   416    
-48    384    
-416   -384   
-224   -176   
96     -144   
352    -128   
-80    96     
-224   0      
-64    -96    
32     0      
256    -144   
-160   -576   
-80    -112   
-16    272    
-48    48     
-96    -48    
176    -80    
-352   -208   
128    -80    
384    128    
96     224    
-288   144    
-112   -32    
-240   -1104  
2224   -976   
-1072  480    
-80    80     
480    -224   
-560   528    
288    -416   
512    -640   
-224   1024   
-112   416    
432    32     
-1200  -160   
80     64     
192    144    
-432   -384   
48     -64    
192    96     
160    -416   
-208   16     
0      768    
32     144    
160    -1072  
-1712  1104   
1920   -400   
-1136  -128   
560    -368   
-160   -256   
80     400    
-592   384    
-112   432    
208    -352   
64     -80    
32     0      
-480   304    
480    64     
-128   -192   
-448   240    
288    16     
-304   528    
656    48     
64     16     
-384   64     
64     32     
-304   432    
-576   -3184  
-1072  -1232  
1072   320    
-112   352    
-816   -96    
880    -304   
-416   352    
-336   384    
48     -96    
224    -224   
144    160    
240    1232   
-1008  208    
-320   -208   
736    -112   
-496   160    
-272   -640   
-128   96     
416    224    
-288   64     
-64    176    
-176   -416   
512    544    
240    -64    
-192   16     
-272   -512   
576    -896   
960    512    
-2000  416    
1216   -16    
624    -48    
-416   32     
-368   -176   
480    -896   
560    -128   
288    -240   
-688   272    
400    128    
128    144    
144    64     
-128   64     
-128   80     
-176   144    
240    160    
-112   0      
48     576    
176    -96    
-368   464    
544    16     
-528   96     
-416   160    
608    128    
-96    80     
-160   32     
-16    48     
-80    64     
-32    16     
608    208    
-320   128    
-112   176    
496    112    
-352   272    
-144   -144   
432    80     
-224   -496   
64     192    
32     160    
96     224    
-96    -16    
-48    160    
208    64     
-304   176    
64     32     
224    -256   
-416   0      
304    -32    
-80    224    
80     96     
-80    -560   
768    -416   
-288   512    
-80    112    
112    320    
-112   16     
-320   -32    
416    160    
64     336    
208    64     
-272   128    
320    160    
-32    -16    
-256   96     
288    -16    
-48    -288   
-192   -336   
32     112    
176    -112   
-64    336    
-80    32     
128    -432   
-112   16     
192    -32    
-208   480    
-48    -368   
32     -16    
-112   272    
96     -80    
80     80     
-896   -2448  
-48    -224   
944    48     
-1136  -368   
592    400    
320    -144   
-464   -160   
-48    -544   
-192   224    
480    64     
-112   -144   
-144   272    
64     64     
48     -272   
16     176    
16     0      
32     0      
144    592    
32     64     
-16    -112   
496    752    
-1024  896    
624    -64    
48     -304   
-144   -16    
416    464    
-864   656    
352    -48    
240    -96    
-48    256    
-16    96     
-160   304    
96     160    
128    -48    
-96    0      
336    80     
-208   -208   
-208   -208   
384    -208   
208    192    
-432   -288   
-112   176    
304    -96    
176    0      
16     -32    
-528   64     
288    -16    
0      240    
336    32     
-640   -64    
288    720    
1344   -464   
-608   96     
-128   -480   
672    176    
-784   -208   
400    192    
144    640    
336    368    
-208   368    
112    -16    
368    96     
64     96     
112    400    
-448   -16    
160    384    
112    -400   
160    -192   
-288   -560   
64     -128   
256    -80    
-608   -64    
1440   -336   
-544   -112   
-272   -176   
-96    368    
320    -176   
-32    -80    
-144   304    
48     -704   
240    144    
208    -16    
-160   80     
-160   16     
64     -112   
208    -368   
208    176    
-336   -384   
144    -96    
-96    304    
192    304    
-144   -320   
128    0      
720    64     
528    528    
-800   80     
-192   -224   
368    192    
0      -128   
-64    -16    
80     -224   
736    896    
-560   0      
-416   -896   
960    80     
-384   -1504  
-272   -144   
-384   224    
-80    -32    
304    64     
0      -560   
-208   -32    
80     -976   
112    -144   
160    96     
128    -32    
-704   48     
160    64     
224    16     
-560   -688   
-80    -2416  
1280   -2912  
-672   784    
-432   -608   
-528   -64    
32     -912   
-176   -1776  
320    -256   
272    -32    
-400   208    
224    -400   
272    -432   
-96    320    
-96    256    
-144   144    
272    -240   
160    400    
-16    -192   
0      64     
240    480    
-160   32     
208    -64    
176    -240   
-112   -272   
-160   -784   
320    144    
-16    -400   
-128   224    
-272   1408   
16     656    
96     64     
80     -144   
-192   144    
-80    192    
-400   -560   
64     -432   
96     -48    
-112   -896   
0      -256   
144    624    
-512   -256   
256    -336   
0      64     
32     80     
-288   -48    
208    -416   
-48    -752   
16     1120   
512    -80    
-144   608    
-16    -336   
-368   -304   
608    -720   
-352   -448   
-128   -752   
400    -624   
-320   -1872  
-112   -1056  
448    -1200  
272    576    
-480   1408   
-16    -48    
64     96     
288    416    
-512   -80    
-176   -128   
-848   -400   
64     -592   
-192   -608   
-192   304    
320    96     
-80    -432   
176    176    
-16    -96    
64     -32    
240    368    
-448   432    
0      256    
624    -80    
-464   -64    
-144   -16    
-80    32     
192    512    
432    144    
-144   -448   
-32    320    
96     -736   
80     112    
144    448    
-64    288    
-272   -272   
400    -112   
-464   0      
-96    112    
144    32     
-96    128    
-128   -32    
192    -144   
64     32     
80     -384   
16     96     
608    464    
-944   640    
352    -224   
432    -224   
-432   -32    
32     432    
-80    336    
336    400    
-80    672    
-16    0      
-80    -16    
128    48     
-112   128    
-48    80     
144    608    
96     80     
-384   16     
-48    -80    
512    -800   
-144   -272   
-176   208    
-96    320    
192    160    
80     16     
384    -304   
-512   -112   
-224   32     
672    128    
160    -448   
-560   160    
-1072  -1392  
-480   -656   
528    -128   
-640   496    
-576   576    
144    560    
-560   688    
-560   144    
528    -176   
-160   -288   
-272   0      
-128   -64    
48     32     
176    -480   
-64    -128   
-112   -16    
80     64     
-128   464    
256    336    
-208   256    
-400   96     
336    1312   
784    -112   
-816   -608   
-256   -1328  
-16    -384   
192    192    
-64    368    
112    -192   
128    688    
-448   128    
-176   -64    
464    112    
-16    -112   
-240   96     
-688   32     
304    -16    
-128   16     
-400   96     
-64    -96    
208    80     
16     -160   
64     -112   
-928   192    
656    64     
-112   768    
-496   16     
64     640    
-288   64     
-672   -112   
352    -272   
-192   -32    
256    224    
32     352    
-864   -336   
448    160    
-32    -208   
496    -96    
-240   48     
32     144    
-176   32     
160    -16    
208    -16    
-80    160    
0      64     
-128   128    
-64    32     
-32    0      
-80    48     
-512   -720   
704    -1024  
144    -1056  
-208   1040   
1184   176    
-160   -112   
-1184  0      
256    144    
912    128    
-112   64     
-304   -432   
-64    -240   
448    192    
160    16     
112    48     
-512   80     
480    64     
64     80     
240    0      
-384   208    
528    -368   
-464   240    
768    64     
-160   416    
-1056  -256   
48     80     
896    -80    
-336   144    
-768   -64    
352    144    
240    -48    
-368   80     
-560   -176   
-224   112    
400    128    
176    304    
-480   96     
0      144    
384    128    
-144   -32    
96     112    
-96    -64    
128    32     
240    32     
-160   128    
-176   -80    
192    176    
96     32     
-448   96     
-32    128    
144    32     
-32    -80    
96     -64    
32     336    
688    -288   
-16    96     
32     -272   
-16    -64    
304    160    
288    496    
-624   224    
160    256    
272    64     
-144   160    
-64    128    
-16    144    
192    -32    
16     416    
-112   592    
384    80     
64     -192   
-368   16     
16     144    
160    64     
-368   208    
128    208    
32     80     
208    -912   
-528   64     
240    400    
96     -480   
-32    -288   
-832   -2560  
64     128    
848    48     
-944   -16    
752    256    
-192   -176   
-400   160    
48     -272   
128    -48    
288    176    
-560   528    
144    -240   
16     208    
192    -256   
-240   176    
80     208    
32     80     
112    480    
112    144    
-256   -208   
208    624    
-544   -400   
-352   672    
1008   -176   
-832   176    
96     0      
16     80     
496    448    
-512   464    
16     48     
-192   64     
-16    -64    
384    -96    
-288   144    
-144   -160   
128    64     
-144   -16    
16     32     
-80    32     
192    48     
-16    112    
-160   96     
160    128    
-304   128    
432    112    
-32    -16    
-304   224    
272    0      
0      144    
368    192    
-1072  2656   
1776   576    
-544   304    
128    -304   
784    272    
-912   384    
192    400    
272    256    
48     32     
-48    -32    
16     192    
224    96     
-32    32     
80     96     
96     160    
-224   272    
32     -304   
272    -288   
-272   48     
80     144    
48     128    
-560   -832   
960    -480   
288    224    
-416   -288   
-80    -32    
224    112    
-112   16     
32     272    
368    -112   
-16    96     
160    64     
-128   -224   
-48    64     
112    -352   
144    144    
-176   96     
64     304    
208    272    
-112   224    
32     0      
-48    0      
0      -160   
432    -96    
368    160    
-192   512    
160    -160   
448    -272   
-464   208    
-192   0      
928    -64    
-192   80     
176    64     
-32    -16    
640    -96    
-528   -32    
624    -288   
-672   -64    
-48    304    
368    96     
80     32     
-192   80     
-160   -160   
112    128    
176    -16    
608    1120   
-864   -992   
48     48     
144    -528   
-32    -112   
-384   272    
-32    2576   
912    224    
-992   -288   
448    208    
1072   544    
64     -80    
-688   -1232  
-48    544    
192    -272   
48     -112   
-80    -656   
-48    0      
288    320    
304    -192   
16     160    
-96    864    
-112   -48    
384    176    
-16    -304   
-48    -32    
-96    512    
128    -240   
176    -320   
256    -304   
-112   384    
32     -64    
176    128    
176    -784   
32     -112   
-160   0      
48     224    
-160   32     
48     192    
352    96     
-336   -224   
-32    240    
160    -992   
80     880    
128    576    
-96    256    
160    -64    
80     256    
-112   176    
-208   -64    
176    192    
608    736    
-192   160    
0      448    
-32    -368   
224    32     
-288   224    
560    480    
560    848    
-320   48     
-240   -32    
240    -992   
-48    256    
112    -1232  
256    0      
-288   976    
-192   -912   
-96    -400   
272    -352   
96     -672   
-272   -464   
-64    -176   
432    -384   
144    272    
-96    -48    
208    128    
-48    -160   
144    144    
80     240    
320    -416   
-224   16     
-272   -96    
80     0      
-416   96     
-112   64     
288    48     
-96    -944   
304    144    
-32    -2848  
224    -1056  
224    464    
144    208    
-368   48     
48     848    
416    -160   
-320   0      
-240   -496   
64     -160   
-128   96     
128    128    
160    96     
-224   -48    
64     112    
400    -128   
96     0      
-112   208    
64     736    
-224   -96    
480    128    
240    -512   
-64    128    
-224   -368   
336    -480   
176    752    
-192   -112   
-96    -160   
80     32     
416    80     
208    528    
-16    240    
-32    -1072  
32     432    
256    -176   
-32    416    
-128   80     
144    32     
128    -160   
0      112    
-112   -144   
-160   -272   
-960   96     
112    176    
-320   48     
128    -48    
80     -128   
-64    -480   
768    -528   
-2112  -992   
864    -416   
-160   -304   
-144   384    
800    -32    
-880   -224   
64     -144   
96     -112   
64     112    
-144   48     
-16    -112   
256    -224   
224    80     
-656   -112   
272    304    
144    -960   
-64    -288   
-160   -288   
96     -208   
32     112    
704    864    
-1648  256    
320    48     
176    224    
-432   -464   
256    272    
80     -160   
16     64     
48     -64    
288    32     
32     -1296  
-336   160    
32     -16    
304    -208   
-288   48     
48     -16    
-96    -128   
-320   256    
-208   16     
-112   -256   
176    16     
0      496    
-96    -352   
-400   -16    
688    352    
320    -656   
0      368    
-336   368    
-592   624    
448    192    
-528   48     
-368   -224   
-112   0      
208    -48    
384    64     
80     -256   
-384   -144   
336    -224   
576    -496   
-160   32     
-272   -48    
128    0      
32     48     
144    32     
208    -16    
112    -368   
-368   752    
272    -32    
-112   176    
-1184  -1840  
1600   -768   
80     -416   
-640   -960   
816    320    
-672   -64    
-336   0      
128    496    
96     240    
-576   -528   
-16    -224   
320    0      
-160   32     
368    16     
-224   -48    
256    -80    
-32    48     
-944   -112   
288    112    
224    576    
-1232  384    
560    -48    
-144   -192   
-208   -32    
832    240    
-1056  -192   
-96    256    
800    -96    
-736   -32    
32     -256   
-32    0      
160    64     
-112   32     
192    64     
-336   -240   
400    256    
-48    64     
-240   160    
80     176    
96     0      
48     64     
-352   64     
400    160    
-160   -32    
-64    144    
176    176    
-192   96     
-32    336    
864    64     
-416   -208   
16     192    
-192   96     
448    896    
-704   112    
-48    240    
224    96     
-752   -96    
256    -16    
48     -256   
-16    -64    
-256   -16    
288    -32    
-32    -224   
-176   192    
96     -96    
-192   192    
0      32     
304    80     
-48    -304   
-320   112    
32     176    
320    48     
-80    64     
-112   256    
160    64     
-544   -16    
-144   160    
-112   304    
176    32     
32     -128   
-288   304    
-560   -1184  
1008   -2160  
-1152  576    
496    -48    
-544   224    
-240   -32    
592    176    
-48    0      
64     -48    
-816   512    
368    64     
176    -160   
128    256    
-176   128    
-144   368    
288    -96    
-48    -32    
32     240    
-176   64     
96     128    
-64    32     
-272   -1264  
64     208    
288    -32    
-816   -384   
448    224    
96     -224   
-80    320    
-304   352    
80     416    
432    96     
-32    80     
-240   32     
-96    32     
-80    0      
320    0      
112    144    
-64    -112   
-256   272    
-80    80     
80     -208   
-384   -352   
304    -416   
-304   -32    
368    208    
-224   -16    
0      192    
0      96     
-48    -16    
176    -176   
-368   -1312  
1952   -352   
-1536  544    
224    32     
624    160    
-928   224    
544    96     
208    800    
-48    528    
160    400    
-432   176    
176    160    
-80    48     
32     -32    
160    -16    
16     -80    
32     208    
80     208    
112    560    
-224   128    
176    192    
512    1168   
-1808  -304   
-432   -128   
1408   -656   
-1168  -96    
608    720    
-368   -128   
-400   144    
528    -240   
-176   48     
160    128    
-416   144    
32     -176   
160    0      
-112   32     
112    64     
-16    -48    
-272   -752   
-160   -336   
-16    16     
16     192    
32     128    
-80    -720   
544    -1472  
-672   -320   
96     304    
176    -304   
-640   48     
512    32     
336    848    
-96    64     
-272   128    
-16    96     
16     96     
48     464    
688    64     
144    -352   
64     944    
176    224    
112    112    
240    192    
-240   240    
-112   -256   
32     -320   
192    192    
-176   16     
48     -160   
624    -160   
-176   -16    
80     176    
848    2128   
-624   544    
496    -336   
464    -624   
64     0      
-96    192    
96     1520   
336    912    
128    -400   
-80    576    
0      0      
-208   -224   
416    96     
240    256    
-528   -192   
-192   -128   
448    704    
464    240    
-48    784    
-128   848    
144    736    
128    -832   
-64    -1008  
272    384    
-256   96     
-256   -416   
480    96     
-80    1696   
-16    0      
-48    -912   
16     -112   
400    272    
-624   -64    
-32    -528   
128    -1168  
64     32     
80     480    
288    -896   
-288   -48    
16     -144   
240    0      
-96    432    
-80    -448   
-320   -288   
288    320    
80     1072   
224    -400   
-192   -240   
176    352    
448    432    
-272   -32    
-240   -1008  
144    -624   
464    -32    
-16    -976   
32     176    
-160   96     
-64    -208   
688    1264   
304    1968   
-336   -224   
32     -32    
208    -240   
-320   16     
128    224    
384    192    
320    -128   
-288   -544   
-192   320    
96     128    
128    -112   
224    -672   
-208   160    
-384   288    
16     -160   
-288   -896   
368    -1200  
112    288    
-272   800    
-336   112    
-176   -416   
960    -688   
576    432    
-336   80     
-320   848    
928    1168   
-192   -624   
-64    -176   
32     -368   
-16    -496   
352    192    
96     160    
-160   96     
-32    112    
336    64     
400    -80    
-320   672    
64     160    
176    -80    
176    -304   
-304   -336   
352    -1216  
-144   304    
192    -1312  
-48    0      
160    272    
-112   -272   
-32    -480   
256    -32    
-256   96     
128    -48    
240    176    
128    -368   
-192   416    
272    -976   
-208   -448   
512    -624   
64     272    
-160   -464   
-128   224    
160    -48    
-16    0      
-320   112    
224    64     
256    304    
80     -192   
-336   272    
128    -128   
64     128    
304    -240   
720    -720   
-2176  -928   
896    -64    
480    112    
-928   -144   
0      224    
576    -176   
-160   432    
112    -208   
496    112    
-192   -240   
-48    176    
112    -64    
160    240    
64     0      
-256   384    
-64    -528   
-128   208    
560    -160   
-128   112    
-16    32     
160    160    
688    -448   
-1616  -16    
960    -1232  
256    32     
16     -1520  
-256   -96    
272    80     
240    -528   
-144   -64    
-16    -272   
16     -560   
-48    96     
320    80     
144    -16    
-368   -64    
144    -368   
-144   208    
208    -320   
-240   -256   
464    240    
-352   -864   
-816   -224   
1200   208    
624    -256   
-336   -464   
-176   -16    
48     496    
-16    -592   
464    112    
480    -192   
-352   -112   
-512   -16    
304    -224   
-64    -672   
112    -192   
-96    -80    
96     -176   
496    -80    
320    176    
-512   256    
-416   448    
928    16     
128    -160   
-16    800    
-512   -16    
336    400    
-272   -48    
-400   -256   
-544   -336   
2688   -2368  
-64    1584   
-624   896    
160    208    
480    -256   
-352   -272   
192    96     
224    304    
256    32     
-512   128    
144    240    
80     -160   
-208   96     
-64    -112   
-256   96     
-496   -144   
304    240    
400    -128   
-864   -656   
-144   -656   
416    -64    
-304   192    
656    -32    
-656   -64    
544    0      
-192   0      
-256   -32    
208    -96    
320    144    
-480   80     
192    224    
-1024  -32    
112    -304   
288    -128   
-48    -384   
-256   160    
352    -544   
-112   32     
-256   80     
96     16     
-224   -112   
352    80     
-336   -192   
64     -144   
288    -96    
16     32     
-384   0      
304    352    
-48    400    
48     384    
64     224    
-272   -368   
528    -112   
-512   -112   
256    -48    
-144   240    
-16    48     
192    -144   
64     -96    
-896   160    
192    -128   
96     80     
96     0      
32     32     
-16    -304   
-112   192    
336    -352   
-256   96     
176    -160   
96     -112   
16     -96    
128    400    
-272   544    
32     160    
208    96     
272    -368   
-272   -176   
64     -192   
288    112    
-32    -352   
896    2432   
-2256  -208   
368    -128   
1568   -1024  
-640   400    
-720   624    
128    -816   
208    -448   
-160   -48    
-64    80     
-144   -224   
-224   -208   
192    -240   
96     80     
-1376  0      
-176   -512   
448    -1072  
112    -32    
-80    -144   
-672   48     
-256   80     
768    -176   
-752   80     
0      -496   
-16    -288   
-32    -48    
32     -288   
-512   464    
176    -512   
-496   160    
160    32     
0      192    
-48    -96    
-112   320    
-400   -400   
48     208    
-224   -32    
0      80     
64     96     
-48    -448   
32     -208   
240    240    
-96    80     
64     -160   
0      -224   
224    336    
0      0      
-208   -224   
-64    128    
-96    96     
512    1168   
-336   240    
-1936  -576   
1536   -624   
-752   -976   
-1040  32     
672    -96    
608    416    
-496   1344   
224    -816   
-144   -544   
-208   192    
192    64     
192    32     
-560   -176   
-80    224    
192    -128   
-128   160    
-112   112    
80     240    
-80    -112   
-768   -336   
1168   -368   
192    -848   
-1456  -560   
800    112    
528    144    
-656   608    
-48    992    
208    448    
-16    -192   
144    -224   
0      -112   
-16    -144   
-80    176    
-32    48     
192    0      
-608   -432   
304    16     
304    640    
-368   512    
240    320    
48     832    
-256   112    
256    976    
176    -544   
-736   -1136  
432    736    
384    -64    
-480   -80    
-96    272    
-96    896    
416    -224   
-480   208    
208    -16    
-320   -192   
-560   -368   
976    -912   
-576   -368   
304    992    
-144   352    
-432   80     
368    192    
-160   288    
16     288    
-144   176    
32     288    
272    576    
-192   704    
-64    208    
112    -96    
-768   -1536  
-816   16     
1040   -544   
-768   48     
400    768    
176    -64    
-608   208    
-512   -32    
208    -624   
208    -192   
-192   112    
-816   -384   
304    336    
368    32     
-304   448    
80     80     
80     -96    
-16    -176   
144    0      
-128   720    
-128   64     
16     -48    
544    544    
-464   400    
-448   -320   
768    -112   
-368   -144   
688    720    
-240   1392   
544    592    
-48    0      
-160   320    
-192   -592   
64     -128   
64     -80    
-16    544    
112    -144   
-912   -912   
304    -608   
96     -960   
-736   -672   
96     -128   
64     768    
304    400    
-240   -992   
-240   288    
-16    48     
-128   -208   
528    576    
-240   320    
-352   -208   
656    -160   
-144   -16    
-96    -1248  
48     -672   
816    80     
-176   640    
-32    -144   
256    -512   
-480   -608   
-336   -144   
96     -192   
272    -592   
-496   -384   
-16    176    
0      432    
288    192    
-112   144    
32     368    
-240   336    
240    320    
32     144    
-144   48     
288    192    
16     160    
0      304    
176    1104   
384    576    
-160   -112   
-176   144    
-96    -432   
560    -2288  
-720   512    
464    304    
-208   -208   
112    256    
-256   368    
592    496    
-528   624    
-64    64     
-32    80     
16     160    
48     -48    
160    -208   
-224   496    
80     -96    
48     -160   
16     -64    
-192   -544   
208    96     
-384   -384   
464    -1024  
-496   608    
672    240    
-80    64     
-480   288    
336    -112   
-128   336    
400    48     
-528   240    
144    48     
-48    96     
160    -160   
-176   -64    
64     16     
0      96     
32     176    
304    144    
-112   304    
-16    32     
-64    176    
368    112    
-48    96     
288    144    
-368   80     
48     176    
-32    208    
304    32     
-32    -64    
-128   208    
144    -864   
-2016  -800   
2448   176    
-192   224    
-1088  64     
736    80     
192    192    
-64    160    
80     -48    
16     0      
160    48     
32     96     
-32    96     
144    -224   
-336   48     
320    -1600  
-96    112    
64     272    
192    192    
48     16     
-32    144    
336    528    
-1392  -16    
64     144    
1104   880    
64     -240   
-256   -304   
32     112    
-160   64     
-208   208    
192    -768   
336    96     
0      336    
-320   192    
192    160    
224    32     
-272   144    
0      -272   
160    16     
480    640    
-880   128    
64     -32    
576    384    
688    -192   
-672   112    
352    240    
-416   64     
-560   -2000  
-448   80     
-528   -480   
848    -544   
224    -32    
-384   416    
-304   208    
-48    96     
416    160    
560    448    
-400   272    
-544   -368   
128    96     
-176   -192   
208    96     
-96    -288   
-80    32     
144    0      
144    144    
-128   160    
-16    96     
-64    -32    
224    192    
976    3936   
288    1200   
-720   352    
1488   -464   
16     -224   
-832   -240   
544    160    
496    -352   
-720   80     
112    -144   
-32    256    
240    96     
-128   96     
368    16     
-176   -192   
-112   224    
464    32     
-128   48     
-144   -240   
96     544    
496    272    
-592   416    
224    32     
224    160    
-272   -704   
96     112    
208    32     
-336   96     
0      112    
320    -64    
144    -608   
-224   -128   
16     -112   
-272   -240   
416    -64    
-128   -80    
16     -16    
-128   -304   
-96    -16    
64     -80    
80     -1856  
-32    48     
64     -336   
-64    -16    
240    176    
-144   -128   
224    112    
-48    -176   
48     80     
432    608    
-272   176    
-64    352    
528    -96    
32     -1504  
-64    -496   
-16    -656   
-64    576    
384    720    
-80    272    
64     240    
128    -48    
-320   320    
160    1008   
992    576    
-560   464    
-48    752    
80     -160   
416    304    
-48    368    
-160   544    
48     -16    
-16    -224   
-224   -112   
-16    32     
-16    208    
48     256    
80     144    
-128   -336   
96     -624   
0      -176   
128    -112   
464    480    
-704   -400   
128    -112   
960    528    
-592   -368   
208    -336   
-16    336    
80     -96    
-240   32     
112    -48    
-960   -256   
192    128    
240    256    
64     -80    
-16    -112   
176    0      
320    208    
-144   208    
48     224    
176    -112   
-192   -240   
528    -320   
-544   560    
496    -576   
-192   -464   
-448   0      
656    448    
-304   720    
128    -128   
432    -400   
-320   -400   
-96    304    
-240   32     
160    -16    
64     160    
-16    -112   
-320   0      
208    -144   
96     -160   
-32    -272   
-416   -32    
80     -80    
64     112    
272    -160   
-256   208    
-144   -912   
320    -176   
256    -928   
-48    96     
-480   144    
1232   -368   
-2992  -368   
752    160    
32     -256   
-768   -528   
-112   112    
16     -240   
-1392  1024   
336    -1808  
272    -240   
-48    944    
48     96     
160    -320   
-32    128    
-80    16     
80     320    
-48    -96    
224    208    
48     48     
128    -16    
-512   -672   
1536   288    
-304   -48    
-352   -240   
-192   -528   
-208   -304   
384    -416   
-224   192    
560    1552   
-160   1456   
272    416    
96     32     
-224   -480   
144    -784   
-192   -784   
-464   176    
736    288    
-704   64     
-176   -592   
16     -752   
80     -368   
16     -112   
80     288    
-176   -592   
384    -1280  
-528   -464   
-32    1024   
720    960    
-256   736    
-144   608    
624    752    
80     -80    
-352   336    
-224   -256   
368    704    
-336   -144   
-112   0      
64     112    
80     496    
640    320    
-336   -112   
0      208    
-1072  -160   
576    160    
144    -16    
-464   -320   
16     -432   
-96    32     
272    -592   
112    -160   
608    448    
288    16     
176    -16    
16     -96    
-272   160    
-352   528    
-64    368    
160    -320   
-368   -32    
-1328  368    
-256   -464   
32     -544   
176    336    
-352   288    
-144   96     
192    -240   
-16    -80    
-144   -112   
48     -64    
-16    112    
256    464    
64     112    
-304   16     
-720   -448   
1248   -544   
-400   -688   
0      -304   
-320   80     
288    -208   
400    -336   
-576   -464   
224    -32    
-16    -32    
192    48     
-352   48     
-128   256    
208    240    
-48    -160   
-32    -32    
-160   -272   
352    -224   
-960   -256   
-48    -112   
64     -528   
-240   -128   
160    -80    
-320   -80    
464    -16    
-272   96     
-96    208    
144    176    
0      48     
-336   944    
704    448    
64     288    
-896   -32    
384    -992   
336    -272   
-128   -400   
-512   208    
112    544    
256    256    
-32    192    
48     192    
32     160    
-192   32     
384    288    
224    -64    
-272   -256   
-208   224    
368    384    
96     -192   
-48    256    
144    112    
-400   16     
224    144    
176    -16    
-208   -192   
-64    -16    
32     208    
64     96     
-816   592    
2720   -656   
-1056  80     
-624   -192   
656    -96    
-256   -96    
-16    240    
-528   -512   
-192   320    
512    -160   
-256   32     
48     128    
-192   160    
112    -112   
208    32     
-320   48     
176    -256   
-240   272    
-112   -80    
352    96     
-224   -1328  
-688   576    
928    128    
-704   128    
64     64     
400    -400   
-464   352    
-48    192    
64     416    
656    0      
-288   -32    
-400   16     
224    80     
-192   80     
352    272    
-16    32     
0      -64    
-368   64     
528    -48    
-384   112    
368    64     
48     96     
-128   144    
304    288    
-464   64     
-16    352    
80     -64    
-64    112    
96     -64    
720    992    
-1264  1200   
1008   352    
-48    -384   
32     64     
688    208    
-1264  -208   
432    592    
-128   -32    
-48    32     
208    0      
-272   112    
112    -48    
-128   144    
368    64     
-336   64     
208    80     
-176   176    
0      0      
64     160    
96     -32    
224    544    
96     -240   
-864   304    
1200   336    
-976   64     
240    464    
288    -16    
-80    80     
-432   128    
96     80     
112    144    
-224   48     
112    128    
-16    48     
160    128    
-80    112    
-48    16     
272    144    
-96    144    
0      32     
0      112    
48     80     
-976   336    
624    64     
-880   288    
0      -144   
352    -208   
864    192    
448    64     
-768   448    
64     144    
16     80     
-16    16     
-80    -64    
-16    -304   
-16    336    
64     64     
96     -48    
-880   384    
240    -672   
-16    144    
48     48     
0      80     
-96    80     
-80    -96    
320    -384   
-160   80     
112    16     
-112   64     
-1184  -1696  
2400   -2576  
336    96     
-976   496    
-432   112    
768    -128   
480    -96    
-624   144    
-416   96     
496    208    
-336   -48    
208    176    
-80    -160   
16     224    
128    0      
224    128    
-240   144    
-96    0      
-64    112    
384    -272   
-832   -1328  
208    -1152  
-128   -480   
144    208    
848    32     
-544   -352   
-544   112    
304    176    
336    320    
-16    128    
-240   -192   
192    288    
16     -144   
-80    272    
352    176    
-432   0      
304    -304   
240    -1408  
-144   176    
-288   208    
272    160    
64     64     
-160   80     
-32    48     
-48    192    
256    496    
0      672    
-240   464    
432    288    
128    432    
-144   544    
-96    576    
-16    928    
1248   -320   
-528   -1280  
-384   -496   
192    -752   
224    -208   
32     -624   
-192   -480   
64     848    
32     576    
48     -384   
64     -240   
112    32     
80     -464   
0      192    
144    208    
320    -400   
0      -352   
-144   -224   
160    -448   
96     80     
128    48     
128    112    
-80    320    
128    272    
288    752    
-240   736    
304    384    
192    -96    
48     112    
-640   256    
752    -48    
-480   -688   
-336   240    
96     32     
48     -32    
112    -176   
352    112    
0      16     
-128   208    
128    48     
96     -160   
-176   48     
-48    0      
224    -32    
240    -448   
-48    176    
-48    112    
-80    48     
-240   -224   
976    -208   
-144   560    
-80    144    
-560   528    
448    -240   
160    128    
-96    -112   
-32    112    
-224   -528   
256    -48    
464    -96    
16     256    
-272   -16    
48     -48    
64     80     
-16    -1104  
80     -32    
112    -560   
-16    80     
-176   64     
352    -112   
80     -208   
-160   -1008  
448    -80    
-528   -336   
-16    -80    
-64    224    
-256   -192   
384    -2640  
288    816    
1120   112    
-2528  656    
1792   -48    
-240   752    
-1040  608    
144    -192   
112    -240   
-32    1200   
-112   -1232  
0      -112   
128    32     
304    16     
-96    336    
-32    144    
32     96     
16     96     
96     272    
-176   -416   
-64    -64    
-544   -96    
-416   96     
1984   -304   
-896   -256   
-352   192    
1024   -800   
240    -1712  
-720   -1312  
112    592    
592    -160   
-336   -480   
304    -784   
0      -176   
-464   -800   
-96    -160   
32     32     
-336   320    
432    656    
-336   592    
-112   160    
320    -288   
16     -96    
128    -256   
-96    384    
768    1344   
-576   896    
-528   -448   
384    -1696  
-592   0      
0      -64    
608    -160   
160    -160   
-560   304    
-560   16     
0      272    
208    -176   
-672   -1408  
-32    -928   
-160   -224   
-352   320    
480    -96    
-192   -64    
-160   -112   
208    208    
272    96     
-64    -32    
-480   32     
-864   -80    
-64    64     
848    1248   
-320   -928   
800    -2288  
-48    112    
-64    256    
-576   -1584  
-128   -640   
496    -432   
64     288    
-720   -304   
-16    64     
352    -768   
-80    256    
-304   32     
-304   256    
-1136  -208   
800    -112   
-288   -144   
-192   -224   
-272   -656   
400    -1760  
144    -784   
-224   96     
-32    272    
-96    -160   
32     -192   
336    192    
-224   352    
624    224    
-432   -192   
-80    64     
192    -224   
-256   128    
96     -416   
-144   208    
-96    -96    
144    112    
-128   -48    
272    -176   
-224   -48    
16     -80    
160    -32    
240    -144   
-432   64     
64     112    
-256   192    
-64    -192   
64     160    
-48    -336   
80     16     
176    -192   
-384   16     
176    144    
432    576    
-944   272    
112    -304   
240    -128   
-384   192    
-48    16     
240    -48    
256    304    
144    208    
-160   32     
-528   64     
192    160    
80     112    
-304   16     
-208   224    
-816   -128   
64     96     
224    192    
-16    -112   
-224   -176   
16     80     
224    -32    
80     112    
-272   -336   
-16    96     
-208   -176   
208    192    
64     112    
-304   -32    
896    -240   
-2896  1616   
1168   -64    
528    -720   
-1408  640    
752    -240   
-336   112    
192    -288   
-128   432    
32     -176   
-176   96     
-272   96     
192    16     
400    208    
-928   400    
352    -112   
208    -176   
-272   112    
160    32     
-96    128    
-512   -608   
544    -784   
-832   128    
640    496    
560    -192   
-736   -16    
128    -16    
352    16     
32     -176   
-464   48     
320    96     
-32    112    
48     -48    
-112   80     
-80    -144   
-672   -96    
432    -192   
-448   0      
464    144    
-224   160    
224    32     
-304   -48    
224    16     
-112   16     
96     176    
240    -16    
-608   160    
448    -16    
-192   0      
-448   -720   
592    2528   
1088   -592   
-2128  528    
288    -448   
64     -160   
496    0      
-432   -160   
480    -272   
-240   -240   
-384   224    
128    0      
160    80     
-32    32     
-208   -80    
256    224    
-128   -16    
-32    160    
-144   -224   
160    -144   
-16    -128   
16     48     
-352   -768   
-400   592    
976    -80    
-976   32     
544    176    
304    -16    
-576   -96    
624    -160   
-496   272    
32     -112   
208    112    
-272   -80    
-16    64     
352    144    
-48    -48    
-176   48     
-64    208    
-48    -352   
352    -96    
-128   160    
-144   112    
496    128    
-384   -320   
128    64     
176    0      
-80    752    
-688   -48    
128    16     
336    208    
-336   -96    
112    64     
208    96     
-64    80     
80     208    
64     -32    
64     64     
-224   -16    
-112   32     
528    32     
-672   -64    
224    96     
240    16     
-64    272    
-112   0      
-128   -16    
48     80     
-16    128    
96     48     
-288   768    
864    1120   
-400   -448   
-288   240    
1344   -304   
-1072  64     
-576   -128   
912    -80    
128    -64    
-432   144    
-272   -128   
160    368    
400    -32    
-96    240    
-192   -96    
-64    -80    
432    48     
-16    80     
-208   -112   
-272   -64    
608    -720   
-352   -176   
64     224    
-32    336    
-784   -112   
464    -336   
96     256    
144    176    
-240   0      
208    -608   
224    -848   
-272   176    
80     1088   
128    -544   
16     -608   
64     -48    
-112   224    
32     -64    
-384   16     
592    -848   
-208   -368   
-240   -160   
64     112    
160    -80    
-48    -128   
-288   784    
656    1184   
-384   0      
-80    -1040  
432    -864   
-384   800    
-96    336    
48     336    
320    -592   
-768   -848   
592    -1088  
-544   -240   
-96    400    
240    272    
-144   160    
64     512    
64     32     
-112   -224   
80     80     
-16    16     
-112   48     
-144   272    
-48    -16    
-48    96     
-304   112    
256    16     
16     32     
48     96     
80     96     
-176   112    
-32    272    
144    16     
-48    32     
208    176    
-432   304    
208    128    
-144   64     
-256   -800   
816    -336   
-608   336    
848    -208   
-368   240    
-32    368    
96     -496   
240    -176   
-224   272    
64     256    
-336   64     
224    32     
192    48     
304    128    
-560   176    
352    -688   
352    -192   
-160   16     
0      304    
-112   48     
320    -304   
-1216  32     
848    112    
-144   256    
-32    -32    
-16    -48    
64     96     
-48    384    
224    -16    
544    -192   
-176   -112   
-544   448    
432    -2560  
208    -272   
-208   128    
-64    272    
272    624    
128    336    
128    240    
128    -112   
-224   48     
352    -48    
-160   -272   
48     -112   
-16    -48    
160    160    
-64    144    
304    -800   
-448   560    
96     -544   
-480   1920   
2608   -240   
-720   224    
-464   -64    
528    224    
512    464    
384    1248   
-512   1168   
-592   -1712  
480    -1088  
176    48     
-304   704    
80     -112   
-272   -192   
320    -448   
176    192    
-256   -208   
-208   -432   
288    -496   
128    -48    
336    960    
-1728  176    
208    608    
608    768    
-864   352    
-48    -1168  
-288   -1280  
512    -368   
-640   -128   
352    -224   
192    16     
-320   48     
-112   -80    
176    -16    
112    16     
-512   160    
368    176    
144    400    
304    240    
-64    80     
-112   -192   
16     16     
-272   -192   
-528   80     
144    144    
656    -304   
0      192    
-208   192    
96     80     
192    784    
704    -96    
-400   -832   
0      0      
272    -320   
336    384    
-160   -208   
-768   496    
816    -480   
224    112    
-16    32     
96     320    
-208   -256   
32     16     
816    -336   
-480   544    
208    -48    
16     -80    
336    64     
-64    32     
-256   -1184  
320    928    
1392   -64    
-1264  -192   
-272   80     
352    -208   
768    192    
-800   -16    
-304   -672   
16     64     
496    -1104  
-208   -560   
-144   64     
-64    -32    
-224   48     
288    -704   
32     32     
-16    -32    
-176   64     
480    -304   
-816   -96    
880    -32    
-416   80     
560    -80    
-672   -16    
112    352    
0      -128   
176    -32    
-144   -416   
-176   160    
336    -288   
-480   128    
368    -896   
144    -64    
208    -16    
-176   -48    
-128   -64    
352    -448   
448    -656   
-112   -224   
-16    80     
-48    0      
-800   -32    
656    -96    
-80    96     
96     32     
-144   -32    
144    -448   
224    -144   
-256   0      
160    48     
-224   -16    
128    -512   
-704   -224   
720    944    
-704   336    
80     320    
560    96     
-912   160    
144    -288   
-240   -384   
384    0      
48     -32    
-176   -64    
96     -1328  
-368   16     
336    144    
-112   304    
224    -336   
-144   -368   
-256   80     
352    -80    
0      64     
-96    -176   
-400   -240   
-96    -128   
368    -16    
-144   -48    
272    48     
-160   -672   
64     -64    
1600   3152   
-2576  128    
-112   256    
1600   -288   
-656   32     
240    -80    
-848   224    
560    -656   
-368   -144   
160    128    
-944   64     
-16    48     
272    -80    
-128   -384   
-144   -224   
-16    -48    
336    16     
-144   -16    
32     -112   
144    -48    
-368   -640   
704    -16    
-608   96     
-96    48     
512    0      
-608   144    
256    -160   
288    -80    
-128   -320   
-80    288    
-272   -192   
272    48     
416    -240   
-304   32     
-464   -144   
464    128    
-80    -48    
-176   176    
256    -64    
-464   -48    
512    -144   
-96    -80    
-48    80     
112    -128   
80     -128   
-64    -240   
160    16     
-304   128    
192    48     
-144   -256   
-640   -1648  
16     -528   
1120   -240   
-1344  -224   
416    80     
288    32     
-512   224    
48     144    
512    -32    
-208   0      
-1184  -272   
-272   -48    
64     160    
-80    -256   
-160   80     
432    -144   
-384   176    
176    -176   
64     -144   
160    -128   
-32    128    
-672   -992   
-384   624    
784    -624   
-880   -288   
80     288    
-432   -96    
-208   -112   
-624   352    
-144   64     
-720   -112   
16     96     
-64    -176   
-96    256    
-144   -32    
80     -16    
-336   -112   
48     288    
432    -512   
-160   288    
-160   80     
240    -192   
736    -288   
-1008  704    
16     -320   
352    -16    
-544   160    
-352   -16    
352    64     
16     -112   
-160   80     
-208   0      
208    64     
-16    -32    
-96    112    
176    160    
832    160    
-752   176    
48     384    
0      -288   
-592   144    
256    64     
-1200  -16    
208    112    
-32    -224   
144    608    
-528   128    
-304   32     
768    400    
-192   16     
-896   -1360  
1264   -2720  
192    240    
448    384    
-400   80     
-272   224    
960    1072   
-720   2096   
-288   -432   
-48    -480   
-160   -64    
64     32     
0      -96    
288    320    
144    -288   
-112   -256   
-416   -416   
64     288    
-128   -64    
160    -512   
-160   64     
-80    608    
304    320    
-416   432    
-256   1248   
240    640    
-144   -96    
224    -592   
-32    -320   
-176   -416   
256    96     
-96    320    
160    -16    
48     -640   
-288   0      
-208   -16    
224    -112   
128    -864   
-640   -880   
-192   -192   
48     -16    
176    -240   
176    -16    
-432   -1056  
112    -688   
176    400    
32     144    
-64    -320   
-272   96     
-48    432    
-128   -432   
336    1168   
-272   -768   
-416   32     
-352   -656   
-240   -64    
-352   128    
224    112    
112    1328   
-64    304    
-32    -432   
64     -80    
-80    368    
-192   -96    
128    144    
-208   80     
0      -16    
-80    272    
-288   -400   
-272   -176   
64     160    
48     160    
192    112    
-352   0      
80     32     
224    96     
0      96     
320    272    
-416   560    
0      192    
400    -112   
-320   -192   
496    -848   
-144   400    
528    -256   
-240   -160   
-256   288    
544    -192   
-64    160    
240    -128   
32     32     
-256   144    
176    16     
64     -128   
-32    64     
-288   -16    
192    -32    
-144   -176   
192    320    
-192   272    
-32    352    
128    -496   
-432   -304   
240    432    
-128   400    
160    160    
80     -368   
112    432    
-288   1280   
0      384    
400    80     
-128   320    
-624   -80    
256    336    
-176   -240   
64     -224   
288    80     
128    560    
-464   -48    
-48    -560   
160    544    
-16    736    
0      -608   
-544   -176   
288    464    
336    48     
-16    256    
-352   272    
112    -80    
-160   16     
144    368    
-848   1616   
3136   -576   
-896   304    
-1440  -1360  
656    -176   
-208   112    
16     -512   
320    -96    
-112   0      
-544   96     
208    -32    
32     -16    
-16    -96    
304    32     
-160   -128   
-32    16     
0      208    
176    288    
160    176    
-32    48     
32     496    
400    -848   
-1696  48     
1712   64     
-160   336    
-672   -112   
960    192    
-160   -384   
144    -48    
0      128    
-144   96     
-64    80     
96     64     
160    192    
544    160    
-384   80     
-176   -16    
416    176    
384    48     
-224   -64    
-64    128    
16     80     
-512   -1120  
192    0      
0      -48    
16     256    
64     240    
192    512    
-880   240    
48     64     
544    -64    
160    80     
-144   288    
64     304    
-96    176    
-16    160    
-32    -32    
176    -368   
0      -400   
-160   -1248  
336    272    
0      128    
64     48     
-16    96     
-160   80     
-80    624    
1264   128    
-592   32     
-400   320    
-464   -592   
-1408  -2592  
-544   -336   
-80    528    
544    224    
400    -112   
240    208    
-1056  320    
496    176    
144    96     
16     80     
32     -16    
-240   32     
-112   160    
96     112    
0      112    
-144   -160   
-128   112    
240    -112   
128    432    
304    -816   
-592   496    
848    -432   
-816   128    
-48    -160   
416    384    
560    48     
-704   -128   
368    -48    
336    -128   
-144   64     
176    16     
-32    144    
16     -416   
32     288    
432    -288   
-384   320    
-48    -800   
176    192    
48     16     
224    112    
48     0      
-384   -32    
448    144    
-144   176    
464    240    
128    128    
-224   -64    
0      -464   
288    16     
-208   -128   
96     48     
288    752    
-416   80     
-256   -1152  
576    -352   
-800   -304   
272    240    
304    192    
304    160    
-288   112    
144    -640   
128    144    
-112   -128   
512    -32    
-160   -224   
-112   144    
416    992    
464    192    
-432   -976   
-576   368    
560    80     
240    64     
160    -224   
-320   -96    
-128   144    
192    32     
592    -48    
96     512    
-512   416    
160    -320   
-336   -928   
2176   1072   
-176   320    
-832   416    
160    80     
-480   -32    
560    -2336  
48     -2064  
352    -432   
-368   -96    
128    -144   
432    -48    
32     -48    
-96    128    
-16    912    
320    -96    
-112   -144   
240    288    
-416   496    
208    -240   
80     -128   
-400   -448   
1072   -496   
-400   192    
-608   -848   
656    80     
160    -528   
-80    0      
-272   -176   
160    -304   
144    -80    
176    -32    
-16    -208   
-160   240    
-48    -416   
-16    0      
208    -32    
-416   -288   
-1280  32     
208    -96    
112    -96    
112    -80    
-96    -48    
16     80     
224    32     
-48    -128   
-112   224    
304    -272   
0      64     
-112   -272   
1600   1328   
-1344  496    
-304   -176   
752    -112   
-592   -32    
-448   304    
1072   -64    
-160   208    
-336   -176   
-16    -16    
160    -2704  
224    -192   
304    64     
-336   -112   
-64    48     
336    224    
-144   -64    
-352   -96    
-192   0      
416    -16    
32     -48    
384    976    
-1280  -928   
-464   -576   
1616   -304   
-928   -1024  
-16    448    
144    -320   
-512   224    
592    256    
-528   80     
-48    -48    
96     0      
-240   -112   
16     -16    
-544   96     
48     0      
16     320    
128    192    
-144   0      
-64    -544   
-32    -80    
-48    -1056  
64     880    
-240   -272   
128    -80    
672    1008   
-992   -176   
-352   -112   
832    -48    
-544   48     
-96    16     
-432   48     
-16    -208   
-208   -32    
64     -720   
400    48     
-448   864    
576    -256   
-208   -240   
-656   176    
-64    48     
176    -224   
176    192    
-432   -128   
-384   -544   
-48    -496   
176    -112   
-368   -32    
-384   304    
464    -432   
48     -1952  
-2416  -1216  
1120   0      
32     -320   
-80    -304   
-656   768    
-144   1536   
272    416    
336    -192   
-112   432    
-288   224    
144    -432   
96     -400   
352    144    
-80    -272   
-336   -416   
16     -224   
16     256    
48     0      
96     48     
-80    320    
-192   -256   
-32    96     
48     -272   
-80    80     
384    512    
80     1072   
-480   -640   
400    -368   
-384   288    
-208   416    
-240   -176   
-96    48     
-224   16     
-736   -272   
-32    -592   
-32    112    
-320   -208   
-288   -720   
240    80     
112    208    
-160   368    
-336   -112   
-64    480    
320    -400   
-192   -48    
-160   112    
96     720    
-144   96     
608    -80    
-192   48     
-80    1008   
576    960    
-96    1216   
32     736    
-64    192    
240    528    
-704   -688   
-96    80     
160    -304   
48     288    
-96    80     
64     64     
-160   144    
-96    -176   
400    -320   
-768   -448   
-16    800    
-80    880    
416    -544   
48     32     
80     80     
-144   -160   
160    240    
176    304    
-16    432    
-256   528    
288    624    
128    160    
272    -448   
-1008  -256   
528    -992   
560    512    
-384   496    
-688   1056   
176    128    
-48    -656   
16     -640   
208    160    
-272   432    
-144   464    
-16    112    
-16    112    
192    368    
96     160    
-64    80     
-352   48     
32     336    
96     96     
-112   96     
-800   176    
384    -480   
-416   480    
800    -832   
-528   -384   
-48    208    
368    -240   
-352   480    
64     -144   
-64    -496   
32     816    
-48    -400   
256    608    
-464   -128   
-352   -112   
-64    -16    
208    0      
-80    -256   
0      304    
144    -112   
-368   -304   
16     -48    
288    -96    
-224   96     
448    0      
-560   112    
176    64     
-48    48     
-96    -176   
448    752    
896    224    
-2624  -144   
704    448    
336    -80    
-848   128    
512    -400   
-112   -128   
-32    -64    
288    48     
48     -96    
192    224    
-464   16     
208    112    
-64    -32    
416    240    
-528   48     
160    32     
192    112    
-80    16     
-96    96     
-32    144    
-528   0      
1792   -336   
-1120  48     
256    144    
112    144    
-16    32     
144    112    
-528   -320   
288    -224   
128    80     
16     128    
48     192    
-160   32     
64     480    
80     -160   
-480   336    
448    672    
-448   640    
-192   208    
96     -64    
-112   -176   
464    -352   
-688   256    
240    -80    
-144   -160   
144    -64    
-160   -304   
-608   208    
240    -80    
-16    48     
272    48     
32     -64    
-144   -32    
-160   64     
672    480    
-208   208    
-128   496    
144    464    
-432   144    
400    -160   
144    -80    
-384   64     
-160   256    
80     16     
-160   -48    
560    176    
-160   48     
-688   32     
976    656    
-2048  -1568  
-896   -32    
928    1040   
-128   368    
48     320    
-304   240    
96     208    
336    -224   
-272   112    
-16    -208   
176    176    
-16    -336   
-48    -176   
32     192    
-272   64     
368    48     
240    112    
-432   32     
0      256    
496    -416   
-320   400    
752    -32    
-672   240    
-464   -32    
544    144    
-32    -144   
-496   128    
512    -352   
-672   96     
448    -160   
-560   96     
496    -96    
-272   288    
256    64     
-128   -800   
-320   128    
48     112    
32     96     
288    -32    
176    80     
-208   32     
-144   80     
304    208    
96     160    
-80    64     
144    32     
-224   -32    
320    464    
-304   176    
192    -240   
64     48     
80     880    
-464   0      
-240   384    
96     -160   
0      -192   
-64    160    
336    144    
384    128    
-192   96     
208    224    
-240   208    
112    96     
256    -160   
-144   -256   
16     176    
-176   -176   
448    -96    
0      864    
384    352    
-80    -240   
-208   48     
208    320    
160    240    
-96    -256   
208    448    
-320   288    
80     -96    
304    -176   
-112   -336   
-160   32     
688    -2992  
-704   656    
1312   -848   
-880   752    
96     320    
16     -160   
768    -1184  
-224   0      
-224   224    
-64    352    
352    -32    
-16    -80    
-32    160    
64     656    
16     448    
-48    -880   
160    160    
-16    -272   
-16    432    
112    0      
-368   -208   
1024   -560   
-1088  -160   
592    240    
-16    1424   
-176   240    
352    320    
-256   224    
-112   -208   
192    400    
832    -48    
-688   704    
-16    -800   
144    96     
224    -272   
176    -304   
-400   -32    
128    720    
384    96     
0      16     
64     0      
64     16     
32     304    
112    -16    
96     96     
-224   -80    
112    176    
-16    32     
112    -208   
832    544    
-512   1792   
-480   688    
1008   -272   
-1376  -192   
272    192    
480    32     
0      128    
-224   64     
160    -592   
240    -160   
-144   -496   
-144   32     
448    -128   
-368   64     
-48    80     
272    0      
-256   -464   
-256   -304   
0      -112   
-48    -544   
368    -320   
-1952  240    
1776   672    
-544   496    
-816   48     
624    -288   
512    544    
-208   -592   
-256   -672   
544    -192   
-32    256    
-208   208    
80     96     
-16    -240   
16     -464   
-192   32     
432    752    
-608   752    
128    -16    
160    -256   
-272   -208   
80     -112   
-128   384    
560    960    
-800   528    
816    112    
144    -320   
48     -1216  
64     -928   
48     304    
-400   -592   
464    352    
-304   -128   
784    512    
784    624    
-336   -688   
160    736    
-208   608    
-256   336    
480    192    
-336   -768   
-272   -192   
272    160    
240    -352   
-176   112    
256    0      
288    64     
-112   32     
-112   0      
64     -544   
-880   272    
-48    656    
-448   96     
-224   -496   
1296   1120   
-256   544    
-160   640    
-32    -1552  
144    1024   
-528   -496   
-112   -256   
-432   -208   
160    -144   
224    304    
-208   -176   
80     -224   
-400   -3168  
-208   -480   
320    -272   
-16    416    
48     416    
80     144    
-208   -176   
-16    144    
-48    240    
48     512    
-416   256    
560    448    
384    80     
0      -1424  
0      -80    
-176   -1696  
-32    48     
208    240    
-288   -32    
-256   -768   
368    -416   
-128   -176   
-768   -928   
256    144    
368    288    
-1152  112    
-192   16     
160    128    
224    -176   
-144   32     
0      -1136  
272    -112   
-112   1040   
-16    -240   
-80    -496   
368    16     
-16    1168   
-336   480    
400    1360   
192    352    
-576   800    
64     80     
-400   -192   
32     0      
-64    1440   
144    224    
160    -256   
80     -2224  
32     272    
16     -208   
-144   -560   
-64    -528   
320    -576   
-224   304    
-80    80     
48     -240   
-96    -128   
-336   -48    
16     -560   
-48    -80    
144    -560   
-224   176    
48     -1520  
-64    0      
704    2096   
-1472  192    
208    -400   
608    576    
-400   -544   
-320   -112   
416    208    
320    48     
-368   224    
64     240    
80     496    
-64    -416   
112    -288   
16     -704   
-192   -256   
-64    -224   
224    -288   
-144   0      
-128   -48    
144    -48    
64     80     
-32    1744   
368    -400   
-608   -432   
416    128    
0      -528   
64     -544   
-288   -288   
240    -496   
144    -256   
-144   -16    
176    0      
-160   -96    
16     16     
16     -80    
48     -112   
-144   96     
-112   -288   
16     48     
-176   -144   
80     48     
32     -128   
-432   80     
240    240    
-368   -160   
-112   112    
352    -80    
-144   160    
64     16     
-32    272    
-816   512    
736    96     
176    -256   
-736   -64    
48     160    
464    96     
-368   96     
-48    -48    
-48    208    
-16    -176   
-288   48     
-32    96     
-96    -96    
48     -16    
192    32     
-192   16     
144    112    
16     -32    
-288   48     
352    -192   
-32    128    
-464   -912   
-608   400    
1088   -96    
-912   -144   
352    -96    
224    -192   
-368   64     
-352   -352   
0      16     
-176   -16    
304    224    
-144   -64    
-176   80     
-16    -208   
16     176    
48     -16    
96     272    
240    896    
-544   320    
-144   -272   
336    -48    
144    -160   
-384   -128   
720    96     
912    224    
-368   -256   
512    -576   
576    64     
-544   176    
-48    304    
400    240    
272    16     
-64    -240   
-16    32     
-144   32     
272    80     
240    -112   
112    0      
-368   -48    
-80    48     
352    96     
64     208    
-224   288    
-48    -48    
-32    -224   
80     -112   
-144   64     
272    16     
-96    32     
-560   -4576  
-1056  240    
1184   -304   
-784   96     
336    192    
-112   -32    
384    592    
-160   -48    
-464   80     
-336   -304   
384    256    
192    -48    
-672   208    
112    32     
64     128    
304    48     
-224   80     
64     32     
-448   -448   
704    -752   
-224   -240   
160    64     
-336   208    
-592   -32    
224    -48    
-80    128    
-96    48     
32     272    
320    0      
-208   272    
-160   -80    
112    224    
32     48     
80     256    
-144   288    
80     288    
96     160    
144    -304   
-128   -224   
32     -80    
288    144    
80     144    
-208   144    
96     0      
-272   32     
272    -48    
-64    48     
224    288    
-512   112    
336    -128   
192    -336   
64     496    
-1264  320    
672    64     
-240   -80    
0      -64    
32     -304   
-208   -1376  
-240   -752   
192    -48    
128    96     
-192   96     
128    -32    
224    64     
-224   -16    
-112   -48    
48     -96    
112    80     
-64    224    
192    400    
-32    528    
96     240    
-32    320    
0      176    
-32    256    
160    608    
-240   160    
-176   -496   
64     -368   
-48    64     
-96    288    
320    2768   
800    16     
-1360  400    
720    64     
64     384    
144    144    
-400   128    
48     288    
224    656    
-32    224    
32     0      
-48    240    
-96    64     
128    0      
-48    96     
-32    -64    
-16    272    
176    0      
-176   496    
48     80     
-256   -432   
640    -656   
-448   800    
240    672    
176    -624   
-32    -128   
144    528    
64     16     
96     64     
32     272    
-48    -432   
-48    -256   
224    -144   
160    496    
160    240    
240    -96    
-496   -352   
-144   96     
192    752    
128    -128   
-176   -160   
32     256    
-320   -32    
64     -96    
272    288    
-304   -1232  
96     48     
16     112    
-112   -336   
-592   -1248  
1744   -304   
-816   864    
-256   -288   
1216   -176   
-640   800    
192    -32    
496    96     
-272   -112   
-32    -16    
-96    432    
272    -528   
128    48     
32     -176   
-208   -336   
96     384    
160    160    
-112   -208   
96     -160   
192    224    
-128   240    
160    -720   
-1664  1040   
1280   -752   
368    16     
-432   768    
112    272    
384    1840   
-464   1376   
-224   -1408  
576    -1152  
-192   672    
64     656    
128    272    
-32    -656   
96     -64    
144    -304   
-352   96     
352    -48    
144    -224   
-128   -256   
-32    -608   
-80    224    
-48    -544   
352    384    
-96    -688   
-768   208    
960    1712   
400    912    
-304   384    
176    240    
-368   -192   
688    944    
-496   -192   
-544   16     
64     -400   
-384   32     
1040   1568   
-1008  624    
80     -304   
400    -288   
-48    752    
-352   -144   
-384   -624   
192    -208   
-176   -160   
0      -464   
288    16     
112    64     
-256   -64    
144    208    
-448   -2128  
-1280  -16    
688    -16    
-64    -256   
144    -2304  
-176   -1040  
-144   144    
-16    864    
-176   144    
496    96     
-32    -304   
-416   -16    
-32    608    
128    304    
224    -208   
48     -448   
80     144    
-96    -176   
192    704    
16     352    
-16    304    
16     -112   
688    64     
-800   -384   
640    -848   
16     576    
64     -80    
176    864    
192    816    
16     992    
-48    -400   
-112   -512   
-192   -656   
224    368    
288    -208   
-128   176    
-240   208    
384    144    
-128   464    
96     192    
48     -48    
-64    -96    
464    -160   
-640   -736   
320    -1008  
336    -608   
-112   -32    
-32    -528   
-32    176    
256    368    
-144   -112   
496    -800   
176    1088   
-656   768    
288    736    
528    -2224  
-176   256    
-192   -608   
416    368    
288    768    
400    352    
-272   16     
48     -80    
96     32     
80     -96    
-80    384    
112    336    
272    -272   
32     528    
464    -208   
-432   -736   
64     -128   
144    -64    
0      -64    
-64    -304   
-480   272    
352    -896   
-112   -944   
16     -800   
160    -176   
-592   -2352  
-320   -272   
528    176    
-928   -400   
480    288    
80     -640   
-368   -32    
96     -272   
-16    -144   
384    -368   
-256   -48    
-96    -1888  
112    -96    
-48    112    
240    -256   
-80    48     
80     -224   
16     -80    
304    256    
-320   32     
-224   -432   
208    304    
-192   -464   
-704   48     
1520   -32    
-960   112    
-48    -496   
288    -112   
496    -1488  
-464   320    
-176   -48    
176    304    
128    32     
0      48     
48     -48    
80     112    
-272   -64    
-80    64     
96     16     
0      32     
-80    -128   
144    -272   
-224   -96    
176    -432   
80     16     
-80    -160   
80     112    
-144   64     
336    -64    
-432   -1248  
992    -1728  
-512   128    
352    112    
-48    32     
-128   -112   
-512   16     
528    240    
528    80     
-272   -272   
-32    48     
-64    288    
272    64     
-176   -32    
-192   96     
768    192    
-480   -96    
48     80     
192    -48    
-544   -64    
48     -352   
-848   -16    
-160   -192   
1856   192    
-1264  -512   
192    288    
1072   -2176  
-1216  128    
560    -160   
-96    -272   
-176   32     
288    112    
-32    -16    
-16    16     
-416   -80    
96     96     
208    -32    
112    112    
-464   48     
192    -288   
-32    32     
-48    -1184  
64     -368   
-736   192    
608    32     
80     48     
64     -336   
-688   -384   
112    496    
-16    32     
-304   -64    
464    80     
80     -256   
-96    -64    
144    -80    
400    -112   
-528   -160   
256    -192   
-496   -464   
208    -336   
-64    160    
-192   -160   
-80    64     
256    64     
-336   112    
96     208    
-784   176    
272    -144   
304    112    
-416   -160   
-512   -1600  
80     1136   
960    -944   
-1536  144    
-64    144    
832    48     
-208   -96    
-32    -112   
-32    48     
256    -528   
-176   32     
336    -16    
-400   -48    
-128   192    
64     0      
528    32     
-464   144    
-448   64     
48     64     
-656   -704   
-352   -592   
16     -208   
-208   128    
544    0      
576    -16    
-768   -16    
160    288    
48     -320   
-208   -64    
144    -336   
-544   -320   
32     48     
-64    -64    
16     336    
-96    144    
160    32     
-384   -80    
-208   0      
96     -272   
48     224    
16     80     
-288   144    
96     96     
240    480    
-144   160    
-80    -320   
80     -1184  
176    -224   
-240   496    
96     288    
-160   368    
-208   32     
304    928    
-304   64     
-160   -64    
-16    -352   
-208   80     
240    112    
128    416    
-240   128    
80     208    
-112   240    
32     224    
240    144    
-336   -512   
-272   80     
-192   400    
384    -80    
368    416    
-176   320    
-1232  -16    
144    -48    
304    -96    
192    144    
-80    192    
0      288    
-96    624    
224    -64    
-224   560    
-240   -320   
64     272    
-320   -384   
576    -1232  
-48    -144   
48     1056   
-176   -272   
-464   -16    
48     -512   
64     368    
-32    -384   
-560   -80    
192    -32    
208    -16    
112    128    
-176   -32    
-112   256    
16     -160   
160    -80    
-256   -608   
-112   96     
-64    -304   
320    400    
176    -32    
-416   32     
448    -176   
-496   -112   
-80    -32    
336    176    
256    352    
-160   352    
-48    -32    
-64    -16    
96     112    
-96    -176   
16     224    
-144   -32    
272    272    
-304   416    
16     -400   
416    160    
-144   -64    
-320   240    
192    96     
224    144    
-64    16     
-64    -80    
0      48     
128    128    
192    144    
-192   80     
-496   -80    
-304   -1184  
-736   -224   
80     -224   
-592   32     
368    -224   
304    -384   
336    -96    
-704   -208   
-352   -48    
192    16     
400    208    
-256   352    
-192   -192   
192    -48    
16     -448   
0      832    
-48    -192   
208    -144   
-368   -864   
32     752    
-240   -656   
1216   816    
-304   32     
-400   -144   
480    -544   
-864   -96    
400    -128   
608    640    
448    -1072  
-848   -1408  
80     -768   
256    -16    
-240   64     
368    -16    
144    -112   
112    -176   
-320   96     
384    288    
160    -256   
-160   -368   
-96    32     
144    256    
0      -272   
160    288    
-16    688    
-336   1296   
144    896    
-176   -224   
496    -1008  
-224   -368   
64     -32    
336    -240   
-144   -64    
-256   336    
384    320    
-496   -352   
-32    256    
16     2080   
752    -160   
-240   -32    
-64    -288   
384    224    
-32    -144   
336    -656   
-368   -224   
560    -384   
-288   176    
-96    -96    
-64    -352   
208    272    
1328   2912   
-1472  1392   
688    -304   
496    480    
64     1232   
-704   16     
0      80     
1296   -1264  
-384   -528   
-912   0      
208    112    
416    48     
240    -224   
-416   80     
-128   208    
-256   -16    
400    -32    
-112   -160   
-560   -544   
352    992    
144    784    
240    352    
-400   -640   
-288   272    
608    96     
-624   512    
400    16     
240    224    
-496   -128   
320    816    
-64    432    
144    320    
208    128    
-304   192    
-160   208    
160    192    
-96    128    
240    64     
-16    128    
-112   128    
80     32     
160    224    
144    176    
-208   0      
192    208    
48     -80    
-64    -640   
256    -112   
176    -592   
-400   368    
48     288    
368    -240   
-1072  112    
624    320    
80     240    
32     80     
32     -32    
-352   -96    
128    -48    
176    192    
-32    32     
0      -304   
192    -96    
256    -336   
-256   16     
-48    -224   
176    64     
32     272    
-208   320    
112    -256   
-112   256    
288    96     
16     96     
-112   144    
80     160    
-416   -224   
432    -432   
0      352    
-256   -128   
336    112    
-448   -1424  
2096   432    
-880   208    
-496   -240   
480    -112   
-400   160    
-240   240    
848    32     
32     -96    
-288   144    
-16    -16    
368    -224   
0      336    
96     240    
-288   0      
224    -336   
160    -128   
-224   -448   
256    16     
-144   -112   
112    96     
-528   -480   
1104   80     
80     176    
-864   -416   
560    432    
320    -144   
-96    240    
-224   -160   
128    -16    
16     -160   
512    16     
-160   -144   
-336   0      
80     384    
608    16     
-208   -16    
-112   96     
48     0      
144    160    
-112   64     
240    -432   
0      48     
80     -272   
32     -32    
-256   16     
656    144    
-464   32     
192    16     
0      0      
32     -1504  
-352   -960   
16     -128   
-192   16     
112    -256   
144    64     
-112   -160   
-32    160    
288    -64    
80     -32    
32     -64    
-144   96     
0      0      
288    208    
-160   32     
-16    -704   
304    48     
-256   -384   
80     -624   
64     -288   
-176   -784   
704    752    
-288   -1168  
-1616  224    
1536   224    
-464   -144   
-704   240    
672    64     
160    -800   
-560   176    
256    -448   
320    96     
-304   0      
-208   -368   
560    -64    
-336   -32    
128    -16    
-64    -384   
112    -224   
0      -464   
-64    -80    
64     144    
-464   -288   
464    16     
464    224    
-496   -144   
32     16     
-64    -304   
-256   960    
224    -336   
-448   -160   
96     -16    
-192   -464   
0      -128   
0      -1296  
64     368    
-480   144    
16     32     
176    -592   
224    48     
128    -288   
-96    32     
-48    16     
-208   176    
-480   -112   
368    224    
-512   -192   
-288   48     
416    -32    
0      -352   
512    -736   
-288   -1104  
512    1024   
864    -512   
-1344  -64    
192    256    
672    -272   
-208   144    
240    -432   
-976   -272   
304    -144   
-448   96     
96     -80    
160    208    
-176   -224   
112    -192   
-192   -720   
304    -144   
-192   160    
448    320    
-96    640    
-80    144    
-96    -128   
144    -112   
160    -160   
-592   -160   
464    -144   
-112   -160   
16     400    
-384   -240   
0      -32    
448    -720   
-352   -224   
-304   -1280  
352    64     
192    -320   
-256   -160   
0      1120   
416    768    
-48    640    
-16    448    
224    128    
-64    0      
-176   64     
256    288    
256    752    
272    672    
-176   -272   
224    -112   
80     496    
-16    -48    
-48    32     
160    -288   
-544   -528   
272    -656   
-528   -240   
16     -832   
16     -1952  
32     48     
176    800    
-208   128    
144    -432   
-80    32     
224    -912   
-192   -496   
-128   240    
144    352    
32     224    
320    -176   
-112   304    
-112   32     
-64    48     
176    -48    
-96    16     
-112   -240   
-144   208    
272    -480   
0      64     
-192   448    
208    192    
-80    -48    
-448   -256   
832    -704   
-368   400    
432    -368   
-416   -96    
64     144    
80     -320   
-48    416    
-544   -288   
-64    48     
-496   -48    
0      192    
32     32     
16     64     
-400   32     
-624   -48    
-368   32     
128    16     
-16    48     
64     -16    
96     -304   
-784   208    
240    304    
-192   112    
432    16     
0      -256   
-368   -496   
-144   32     
-144   -96    
208    112    
-432   160    
-208   -16    
32     80     
-80    -32    
-256   96     
144    -32    
64     -176   
-192   -320   
96     208    
128    48     
-80    -416   
-128   -208   
96     -48    
128    64     
32     -240   
-176   0      
48     208    
-320   -32    
-160   256    
-752   416    
-1136  1712   
3312   -832   
-1072  -320   
-880   -960   
592    -176   
0      160    
-832   -1152  
-208   -656   
304    944    
-288   -336   
48     64     
112    -64    
-368   240    
192    -288   
96     64     
-288   -80    
-32    240    
16     -144   
304    -800   
-160   -176   
208    -144   
-1840  1024   
1456   272    
-416   -112   
-624   192    
656    240    
0      1536   
-576   576    
-544   672    
496    640    
-128   544    
-1344  -176   
112    352    
-352   272    
-16    -64    
160    -176   
48     512    
-128   -16    
-432   -160   
-80    -320   
256    -48    
-176   -64    
-496   -608   
400    880    
160    448    
-208   464    
-1760  352    
352    272    
-288   288    
192    192    
-240   -64    
-384   -96    
224    112    
256    272    
-208   704    
512    -160   
-112   -80    
304    144    
80     -176   
-512   -16    
192    224    
-256   0      
384    800    
-336   208    
-208   176    
-64    -64    
-256   128    
240    -16    
-400   -976   
-320   -656   
912    1568   
304    -240   
-1360  16     
-528   -48    
320    -80    
896    128    
-1008  -48    
160    256    
-368   160    
592    224    
-160   0      
-224   112    
224    224    
-464   64     
480    112    
-48    80     
-64    48     
176    64     
-272   1440   
624    1136   
-208   224    
-288   -240   
480    -64    
-160   16     
80     192    
64     96     
48     176    
176    48     
-48    128    
-80    208    
272    64     
32     32     
-512   -336   
320    -208   
-480   -144   
352    -128   
-320   32     
-32    -96    
-352   128    
272    96     
128    0      
-160   -16    
-16    304    
-80    144    
64     480    
384    48     
-608   272    
0      -160   
192    112    
64     -64    
-272   160    
-80    576    
800    -64    
-368   304    
64     208    
-64    400    
256    80     
-240   160    
-128   16     
0      96     
48     32     
176    224    
-48    128    
0      176    
112    96     
0      -48    
-64    -48    
320    -96    
-320   -256   
80     -80    
-32    112    
-320   -48    
240    160    
80     48     
-32    208    
-112   -80    
272    -256   
-144   352    
80     288    
0      -176   
-256   -2640  
-1888  1600   
2080   272    
-544   272    
-112   400    
688    160    
-608   32     
-464   -64    
608    64     
80     80     
-256   -160   
-336   112    
208    208    
384    144    
-704   -16    
208    -560   
224    -64    
-160   416    
336    -96    
-144   -64    
720    1456   
-1328  -144   
-96    288    
1296   96     
-640   -32    
-592   368    
592    -96    
160    -192   
-256   128    
240    -112   
-224   -304   
80     -16    
-64    32     
80     32     
-208   144    
528    480    
-320   64     
48     368    
-32    -16    
-96    256    
128    16     
64     112    
-304   -48    
160    96     
-192   -112   
64     -288   
16     0      
32     128    
-48    48     
96     -336   
448    -2224  
-1360  336    
1344   80     
-80    -160   
240    112    
-864   -464   
208    -416   
112    -736   
-144   -368   
112    192    
-128   -32    
224    96     
64     -2464  
-368   32     
560    288    
-112   48     
-16    176    
416    48     
-400   -112   
64     128    
-112   -96    
656    480    
960    -16    
-1184  384    
864    224    
-48    16     
-304   112    
384    -432   
496    272    
-176   80     
-176   128    
240    32     
64     64     
-80    16     
304    272    
48     16     
-80    160    
144    384    
-64    -320   
-32    64     
16     -16    
224    624    
-320   -592   
-560   608    
1360   -3120  
-624   -48    
-80    -112   
400    128    
-240   -16    
480    0      
-48    192    
-352   64     
80     112    
336    64     
112    272    
-16    176    
-128   432    
560    -416   
0      224    
128    -848   
-480   224    
-48    -480   
16     320    
432    144    
-496   224    
-112   -80    
496    -32    
144    224    
128    400    
-592   704    
-224   3120   
1328   448    
-1088  -480   
192    -400   
752    96     
-16    -272   
-992   -128   
400    16     
-48    320    
-80    -128   
288    80     
16     -624   
-208   16     
48     -288   
144    112    
0      -208   
-128   -192   
176    48     
192    176    
-432   96     
320    -64    
-32    -352   
192    -32    
320    400    
160    -208   
80     176    
-416   416    
304    -1296  
112    -1024  
128    320    
-256   -224   
64     -112   
-224   -224   
384    64     
-48    48     
-192   -1376  
320    368    
96     256    
-160   -528   
336    -320   
-16    -320   
-320   -16    
-48    -368   
128    944    
480    -1856  
-112   -544   
-320   -192   
48     -560   
32     288    
160    -112   
-336   336    
0      1200   
1280   -384   
-768   -256   
304    224    
144    -496   
288    -768   
368    944    
-496   -480   
176    -352   
208    -96    
-144   -512   
96     -64    
160    736    
64     96     
160    -240   
-208   208    
176    128    
16     64     
-320   -224   
48     48     
-80    16     
-16    -80    
112    -32    
224    -16    
-96    -64    
-288   -736   
192    -256   
-16    -160   
-160   192    
-48    -128   
320    -592   
96     -48    
400    -160   
-592   -64    
192    176    
-256   -208   
96     -336   
-160   80     
-176   -272   
-112   32     
288    -304   
208    0      
80     -1248  
-400   224    
160    112    
288    -80    
64     -224   
80     208    
-288   208    
672    16     
-1264  432    
592    -496   
96     -80    
-240   -368   
-272   96     
576    -240   
-432   -272   
-112   -784   
64     320    
16     -144   
80     -32    
-240   96     
128    224    
-32    -32    
16     80     
-272   -240   
416    144    
-576   -656   
32     -512   
240    -160   
-96    -192   
-160   80     
-32    -112   
432    96     
-32    -352   
-192   256    
368    -80    
-464   -32    
0      -352   
-1248  -672   
816    224    
352    -368   
-1456  -320   
560    656    
608    -160   
-384   96     
-240   768    
240    -944   
176    -864   
-400   -1792  
96     -368   
-160   48     
96     -32    
-96    -16    
256    -80    
-64    256    
-224   -816   
-304   -16    
368    -400   
-432   -704   
1376   288    
-1216  -176   
464    1504   
-176   -1024  
-1408  352    
1280   896    
-1088  -528   
96     -560   
144    -64    
-208   176    
16     -48    
144    -160   
48     240    
336    288    
-320   -96    
80     -160   
176    32     
176    -192   
208    256    
-672   416    
-272   -256   
928    384    
-1248  -32    
-208   -128   
128    176    
-432   -64    
416    -528   
672    96     
-80    128    
-496   -272   
-448   -144   
112    32     
-48    -64    
352    192    
32     320    
-1136  464    
-80    -720   
-1360  -176   
176    -16    
16     16     
-240   80     
272    80     
16     -32    
-384   -272   
272    80     
-160   -256   
144    112    
-336   -256   
-496   -48    
-944   688    
320    944    
-688   -352   
-752   -16    
912    272    
96     16     
-320   112    
-272   -352   
352    608    
-448   -192   
48     352    
144    -208   
-160   96     
16     -192   
-144   -32    
32     -144   
144    80     
-16    16     
368    112    
-1232  64     
976    48     
-112   128    
-1456  -480   
-176   400    
464    -32    
-400   16     
352    -336   
224    0      
-384   -64    
48     224    
-16    -112   
112    192    
112    -48    
-432   96     
672    -128   
-432   16     
304    112    
-1072  -160   
416    80     
528    -16    
-624   96     
128    -96    
144    96     
128    0      
16     -288   
-240   80     
544    112    
-192   16     
176    -96    
-32    -96    
-144   144    
544    688    
-1264  96     
512    288    
-320   144    
-208   176    
224    192    
80     128    
80     0      
176    -16    
192    192    
-16    16     
-128   0      
48     240    
240    320    
-256   80     
96     208    
-256   -80    
16     784    
656    -208   
-400   -80    
16     96     
112    144    
16     0      
-208   -80    
48     192    
48     -160   
-80    -592   
16     -400   
-64    432    
-240   -176   
752    -2048  
-1728  288    
1232   -128   
-592   -16    
-656   256    
832    992    
688    272    
-624   -800   
256    -128   
-256   336    
176    -32    
512    128    
-320   208    
-240   -368   
-32    64     
416    240    
-64    -80    
-256   -48    
-64    64     
128    240    
448    1472   
768    -288   
-1008  -208   
128    16     
144    32     
-16    144    
448    336    
-224   224    
-272   -384   
32     144    
352    80     
-384   32     
320    48     
-272   -96    
-128   -32    
208    32     
-304   160    
320    304    
192    208    
-32    32     
-176   144    
160    16     
-192   128    
352    32     
-432   160    
336    112    
-240   144    
112    0      
-176   -144   
1392   32     
-3696  864    
-752   736    
2192   -352   
-1648  -624   
-224   -48    
976    368    
-432   224    
-144   512    
112    80     
192    -32    
-64    64     
-112   80     
-112   -32    
432    240    
-608   -32    
416    144    
-144   96     
240    288    
-160   -32    
-96    352    
272    -592   
-1200  992    
1296   192    
-544   832    
-512   528    
336    256    
-80    0      
-400   144    
80     -48    
176    144    
416    -224   
144    -64    
-560   192    
384    192    
-464   144    
192    0      
80     176    
-640   208    
544    272    
-192   -288   
0      16     
-192   -448   
160    320    
-304   288    
384    -208   
-160   912    
-608   48     
-64    208    
64     -160   
-592   96     
256    144    
-48    48     
304    -112   
-80    96     
-816   -272   
-208   128    
704    480    
16     -1024  
-208   -16    
544    528    
96     48     
-160   144    
32     544    
-80    -16    
336    528    
-416   48     
-112   144    
-144   64     
288    80     
-240   -112   
432    1776   
944    432    
-1184  -320   
64     336    
928    32     
-224   288    
-560   1632   
512    1664   
-336   -64    
16     -224   
256    208    
-336   160    
48     -336   
-144   -320   
400    0      
-240   384    
-240   -32    
368    -672   
-192   -240   
32     160    
192    512    
64     -32    
-560   -192   
384    96     
32     -224   
112    -32    
80     -752   
-16    -720   
0      224    
144    -176   
208    288    
0      560    
32     80     
64     -144   
96     -2400  
0      -384   
192    48     
-336   368    
0      512    
480    -768   
-48    192    
-48    -80    
0      272    
-32    -432   
-112   -32    
128    336    
-160   320    
272    -176   
144    -176   
-144   -96    
560    1024   
-1552  304    
528    -368   
112    -880   
256    128    
16     752    
-64    -160   
-80    -1424  
-272   -32    
64     512    
176    240    
256    48     
-208   208    
144    560    
176    -528   
144    128    
128    -560   
-480   16     
16     272    
0      96     
-128   112    
112    -32    
16     16     
112    208    
-80    160    
400    -96    
16     64     
-144   -176   
192    -16    
-32    -288   
32     224    
288    -720   
-128   272    
512    -80    
-448   -144   
-256   -128   
0      0      
96     -320   
-336   -1184  
48     -32    
-144   96     
16     208    
128    -16    
0      -80    
-48    -352   
384    -96    
48     -32    
-224   192    
128    272    
208    384    
-336   -416   
176    -192   
-208   48     
-176   -400   
832    -432   
224    -320   
-96    -192   
-224   -576   
0      640    
384    16     
320    -144   
-432   -80    
-160   720    
144    -128   
240    -1600  
224    -464   
-320   -1312  
-144   -672   
208    304    
240    -208   
-32    224    
80     -64    
-192   144    
32     80     
464    16     
-128   -16    
-112   48     
-32    -1504  
304    -128   
-784   -1440  
1840   -1152  
-688   448    
-272   -656   
528    128    
-624   272    
768    -112   
-256   -624   
208    80     
16     176    
160    -288   
-336   48     
240    -48    
64     -96    
16     176    
-192   48     
-96    -112   
-272   -208   
-176   -160   
0      -80    
-16    -96    
-48    -96    
768    1312   
880    176    
-416   -48    
-512   -208   
528    -288   
80     96     
-64    336    
912    -16    
-560   -208   
208    32     
160    -48    
-112   -144   
-128   192    
-64    -80    
-64    48     
304    -512   
16     -160   
176    -80    
-576   176    
-112   16     
-16    -256   
272    -256   
-112   160    
192    -432   
-160   -176   
-432   -1104  
-672   -160   
32     608    
528    320    
160    -240   
-160   -368   
-368   48     
-80    -576   
944    400    
-496   -1088  
-816   320    
176    256    
-224   -208   
-16    -256   
-64    -32    
-512   160    
112    48     
400    -96    
-80    256    
-1056  -400   
-496   -32    
784    144    
-496   -576   
-208   -64    
2688   -1328  
-80    -128   
-960   -480   
96     176    
640    0      
-80    -352   
-176   0      
112    -32    
-320   -48    
432    -48    
-448   160    
-304   16     
608    224    
-16    -352   
-160   48     
-112   -224   
272    192    
48     -1024  
-208   288    
720    192    
-864   224    
48     -240   
608    -208   
304    80     
-192   80     
-256   528    
96     -240   
-48    -80    
64     -400   
-96    112    
48     64     
-176   160    
432    -1120  
96     -176   
-240   -96    
-352   336    
768    192    
-528   -32    
-128   112    
144    -96    
-224   -48    
688    -32    
-752   80     
-128   96     
176    272    
288    -48    
-240   240    
-288   -16    
-16    -288   
-80    -176   
192    -240   
464    80     
384    -240   
-368   -64    
96     -128   
-64    176    
-576   96     
352    -240   
-240   -384   
32     112    
-320   -176   
64     80     
-144   144    
-208   128    
160    -32    
-144   272    
-528   -64    
64     16     
304    -176   
-176   -320   
-624   160    
176    192    
-144   48     
-208   -272   
80     -128   
-336   -176   
-64    336    
64     96     
-64    -16    
-16    -96    
-1248  -1744  
1040   -128   
272    -384   
-1392  48     
1056   272    
-64    -112   
-464   -160   
-208   -640   
-48    352    
272    224    
-416   -208   
48     64     
0      112    
160    32     
-496   864    
0      -320   
-304   48     
176    16     
-176   48     
-832   -80    
352    -192   
-1360  704    
992    -256   
-448   -432   
144    32     
144    272    
-224   704    
-32    400    
-64    -320   
96     160    
-48    -160   
-112   320    
-240   -32    
256    -80    
-1248  -80    
16     128    
-32    16     
160    64     
-144   64     
80     80     
-144   -96    
-32    -64    
48     64     
16     -80    
192    48     
-464   -144   
240    -48    
-128   160    
-80    0      
-832   -416   
2000   -384   
-128   400    
-1408  -176   
1296   -80    
-416   -352   
-288   64     
528    240    
224    384    
-224   -112   
-304   192    
192    48     
240    112    
-240   -96    
-128   256    
400    272    
-144   224    
-544   -112   
64     0      
272    -64    
-128   -32    
336    -80    
-1792  1120   
976    -176   
-336   -112   
112    -448   
-32    -304   
0      -272   
336    -48    
0      272    
-352   -560   
112    48     
-400   -32    
16     144    
240    208    
368    272    
-256   0      
-32    688    
-208   240    
96     -160   
160    -48    
-160   128    
-32    208    
-224   128    
-144   256    
160    240    
-560   384    
-528   -288   
768    -880   
32     -160   
-416   -16    
112    128    
112    528    
-64    64     
448    -432   
-144   -96    
480    800    
224    128    
192    272    
352    224    
-192   -192   
48     368    
112    160    
128    192    
-16    112    
272    1008   
-368   880    
-96    64     
352    496    
208    528    
-144   256    
-784   -1936  
-1424  560    
992    -928   
-1024  -320   
544    -32    
112    1136   
-688   -256   
384    -272   
176    624    
256    -448   
-288   288    
48     528    
64     -240   
128    -128   
0      304    
0      48     
304    -112   
-256   -112   
48     -256   
32     -272   
160    1184   
96     -224   
-880   -16    
432    -272   
224    -960   
64     -80    
144    224    
-400   -688   
-256   512    
272    0      
128    320    
-48    -352   
-448   192    
96     -192   
-288   -624   
48     -64    
304    736    
-80    400    
-32    -336   
352    80     
-80    208    
-320   -304   
128    -176   
16     16     
-256   -528   
-32    -224   
-80    592    
-512   -1296  
304    -16    
80     -320   
-160   416    
144    -560   
-528   128    
560    80     
-224   64     
-272   -160   
-288   -208   
432    -448   
32     -128   
-32    224    
-144   112    
-48    96     
144    144    
176    80     
-64    192    
176    -256   
208    -16    
-288   32     
480    -112   
144    160    
-80    192    
-32    -80    
80     -112   
-144   -112   
-64    704    
-128   544    
-240   864    
-80    1136   
0      656    
96     160    
704    -176   
-1680  960    
528    -400   
496    -736   
-208   -464   
208    -912   
-496   -592   
224    720    
-160   768    
112    464    
64     -192   
-80    -432   
-32    240    
144    -496   
48     -64    
-16    256    
96     480    
32     192    
112    -192   
0      32     
416    -48    
-1072  1232   
720    -608   
272    96     
-16    368    
-304   -272   
208    480    
48     -160   
-16    80     
48     -64    
-32    -160   
-16    -128   
96     432    
304    -176   
-128   32     
-16    64     
-32    432    
368    272    
-64    288    
-32    160    
64     16     
-64    240    
-192   208    
96     -64    
-32    336    
272    -256   
96     32     
-80    -1120  
256    -48    
-704   -1424  
1408   -480   
-384   -288   
-464   -288   
1248   336    
-320   -16    
-928   256    
848    640    
-160   0      
0      -112   
192    64     
-64    -128   
-48    -16    
80     224    
288    64     
-400   -736   
352    32     
-96    192    
-160   48     
144    192    
192    32     
-128   208    
-624   -544   
1152   144    
448    -384   
-1104  160    
864    48     
-112   32     
256    368    
-304   -32    
-480   -400   
528    144    
-144   64     
-112   -32    
-208   16     
528    176    
64     80     
-112   -192   
-80    352    
128    -208   
-192   160    
48     -416   
-384   -592   
160    -96    
256    -48    
-496   -176   
464    864    
64     304    
576    -64    
352    320    
512    80     
-224   -96    
-288   -160   
448    0      
-192   -64    
-32    704    
352    -32    
512    464    
-16    240    
32     448    
-192   80     
-240   48     
-160   160    
128    224    
208    -96    
-144   304    
160    -80    
-176   432    
-560   80     
208    0      
-480   -288   
-640   3552   
400    752    
-1136  -272   
608    -560   
288    -192   
160    -464   
-752   -176   
96     -240   
688    176    
-32    64     
-208   -336   
-80    32     
240    -176   
-80    -144   
64     -848   
-176   -48    
176    64     
-112   -48    
640    656    
-544   48     
64     224    
480    -320   
-272   96     
672    96     
-672   -64    
496    224    
128    64     
-352   96     
576    -112   
80     -112   
-96    64     
160    -1408  
-224   -224   
112    -16    
528    112    
-496   -144   
528    16     
-96    -16    
-80    -80    
0      -32    
160    -224   
-288   -208   
144    0      
80     224    
224    -432   
-800   -160   
592    -1152  
-96    -112   
-48    -64    
-128   176    
64     240    
-240   -768   
-80    -128   
336    528    
-336   112    
400    64     
-128   0      
-128   192    
-32    -112   
96     -128   
48     128    
16     -768   
-192   -32    
176    -1552  
-96    32     
128    -16    
-336   32     
-96    -160   
64     -224   
-448   -112   
208    -96    
16     144    
-80    -368   
32     -144   
48     -176   
240    -272   
64     -224   
-208   -64    
272    -240   
48     352    
352    1712   
-1392  -2048  
-784   592    
2288   -368   
-1392  1072   
32     -48    
96     64     
528    -352   
-928   -320   
-128   -208   
0      240    
272    -224   
208    -128   
-80    -1008  
-96    288    
112    128    
-80    -640   
80     -224   
-96    0      
-32    112    
-128   -64    
512    -512   
0      352    
-480   208    
272    336    
80     608    
-192   -384   
128    -240   
48     0      
-48    176    
16     144    
64     -304   
-176   -240   
272    16     
160    416    
-208   -176   
112    -240   
304    256    
-80    -64    
32     368    
192    -112   
80     -80    
64     96     
112    -160   
16     144    
96     -160   
-16    -160   
-320   256    
-64    -48    
336    -176   
656    -752   
-2720  720    
1248   336    
432    -208   
-896   -112   
352    176    
-544   -144   
0      2144   
240    -48    
-16    -256   
80     -176   
-256   -64    
208    -48    
-48    -176   
-240   240    
496    32     
-208   80     
-80    400    
384    752    
-96    -176   
-240   -720   
432    864    
1184   48     
-1264  -704   
-192   240    
480    496    
-336   1264   
416    1968   
-144   928    
-160   400    
-336   -528   
304    -272   
112    160    
-112   192    
-80    176    
208    256    
-288   -32    
272    880    
-448   480    
-256   -624   
176    -480   
32     -304   
-64    208    
-736   -944   
-864   -1168  
-448   -1696  
-80    -432   
-80    -1200  
-976   -464   
448    -352   
-160   896    
368    -448   
160    -480   
-352   -464   
-576   688    
768    -368   
-320   -400   
272    -928   
-560   -448   
336    208    
-208   -208   
-480   -64    
-752   -384   
368    304    
-272   -272   
528    -272   
-112   -592   
16     224    
-16    -448   
16     -304   
256    224    
768    1584   
768    -400   
-1136  -288   
-240   32     
688    208    
64     720    
-864   -1568  
-608   -1344  
400    576    
-48    80     
288    -288   
-320   -176   
-288   -256   
224    48     
-96    176    
-96    240    
240    80     
368    -128   
-272   -272   
-224   -416   
144    448    
384    240    
-768   -16    
-48    -352   
144    -144   
128    -544   
224    -336   
-304   592    
-80    960    
32     -208   
16     -192   
240    -112   
-80    -64    
-416   128    
160    -16    
32     48     
-112   -176   
-160   944    
-288   960    
32     96     
176    -48    
128    -144   
-336   0      
64     -288   
400    848    
-112   1120   
320    512    
48     272    
-96    -176   
-160   -112   
608    816    
-1136  320    
64     16     
480    -32    
-704   -16    
-48    672    
784    688    
32     -240   
-576   -1040  
192    -768   
-112   -288   
-48    80     
160    160    
-256   32     
-48    32     
208    -16    
-320   -80    
-96    416    
144    96     
-16    80     
80     -16    
-128   -64    
-160   -144   
-32    0      
-16    0      
48     -16    
0      512    
-16    32     
-16    -320   
-208   -80    
-32    2320   
1264   48     
-1168  1392   
784    -64    
-192   -592   
-160   -480   
64     -320   
224    544    
-448   656    
224    448    
320    192    
-160   224    
-80    -64    
32     -352   
32     -288   
208    -160   
112    -128   
-208   32     
0      224    
176    128    
-320   -928   
576    -176   
-320   304    
0      368    
496    240    
-96    400    
192    304    
-240   48     
-32    208    
32     16     
16     -64    
80     -16    
48     128    
-112   208    
432    96     
-304   144    
224    16     
-464   -48    
512    -48    
-368   144    
288    32     
0      64     
-160   80     
144    -144   
-432   -176   
192    160    
48     -160   
-416   160    
656    -32    
1968   -96    
-3328  -736   
-2608  160    
2160   560    
960    352    
-1328  -240   
-352   -288   
912    176    
-656   -400   
320    336    
192    -224   
-144   288    
-144   -144   
-16    272    
64     -144   
-32    176    
-208   -96    
80     304    
400    192    
-112   64     
-128   -32    
544    1088   
-464   -480   
-1696  -16    
1376   176    
672    16     
-480   64     
-160   0      
480    240    
-128   144    
-80    48     
80     -80    
240    160    
-208   -160   
352    368    
-32    -16    
-272   -96    
464    -336   
-432   -48    
272    -192   
240    80     
-160   64     
64     544    
880    -768   
-1216  432    
512    448    
-480   672    
192    384    
224    400    
-448   -64    
-272   256    
48     -112   
352    496    
-256   128    
-176   -32    
-64    528    
80     64     
-192   224    
-416   192    
368    368    
-288   -96    
-32    192    
64     80     
0      48     
176    96     
-272   -560   
-176   128    
224    240    
-416   16     
-80    -480   
2224   -1920  
-3152  -1120  
912    624    
928    -176   
-416   -112   
96     -704   
-624   224    
112    32     
576    128    
432    48     
-432   80     
-240   112    
96     96     
368    48     
-32    -128   
128    320    
-176   -112   
64     192    
128    -688   
-16    1008   
688    -432   
-832   480    
736    -240   
-544   112    
-48    256    
144    96     
-80    288    
384    80     
-464   160    
480    288    
-144   320    
16     -128   
112    64     
-112   -144   
80     -128   
-160   -384   
112    -208   
-176   -528   
208    208    
-80    224    
112    208    
208    -64    
64     32     
320    -240   
-496   -80    
-112   96     
400    -128   
112    352    
-256   64     
160    208    
192    -272   
48     544    
-240   -272   
-192   -848   
352    -1760  
-528   -304   
64     656    
208    144    
-256   -64    
384    16     
240    448    
48     -272   
112    192    
64     256    
-112   432    
160    -592   
-48    -16    
160    -464   
-128   16     
192    -80    
32     240    
416    880    
-480   944    
592    176    
96     -80    
192    528    
-320   400    
-288   -272   
336    -688   
160    672    
-128   48     
320    2736   
1008   -128   
-1360  -112   
304    640    
672    -1248  
-304   496    
-160   1776   
-64    -2384  
192    -48    
-96    -1376  
240    -240   
-192   480    
-112   -112   
208    128    
0      16     
-176   528    
-80    -464   
96     -992   
-16    176    
-160   -80    
528    416    
-560   -208   
-720   -960   
272    -448   
160    -608   
672    544    
-720   -1232  
-192   -224   
144    -352   
32     336    
-48    -736   
-32    -384   
96     -256   
288    -432   
208    -288   
112    16     
-224   224    
-128   -336   
528    -304   
16     -448   
-336   112    
112    -160   
128    224    
-128   -896   
192    -128   
-304   224    
176    -48    
352    -352   
-288   208    
64     560    
1536   64     
-2432  992    
496    80     
-800   -64    
-640   -192   
320    304    
624    272    
-448   -480   
-64    -400   
432    -224   
48     128    
128    -64    
128    -64    
-352   96     
48     -160   
224    -160   
-272   -240   
-288   -64    
16     144    
80     -96    
-64    1136   
1312   -256   
-544   112    
160    -512   
-96    704    
64     -1168  
544    -944   
-176   224    
240    1232   
288    48     
-240   -848   
64     -352   
272    416    
-208   -400   
176    -400   
272    -320   
-256   -320   
400    -320   
-176   -240   
80     -64    
96     -320   
-288   640    
544    -288   
384    32     
-416   592    
80     368    
-848   -1968  
-16    -1472  
496    32     
-272   384    
400    816    
400    -16    
-320   480    
-736   -912   
352    -240   
400    -304   
-368   528    
544    96     
-288   -288   
96     -288   
208    64     
-32    368    
32     544    
-320   -144   
336    -256   
-352   -176   
-240   -320   
-128   -480   
96     -224   
-448   -1472  
1472   -1872  
304    336    
-288   608    
-384   1104   
112    -400   
752    -720   
-560   -912   
-864   -1856  
304    304    
496    544    
96     192    
-128   -736   
-560   -112   
400    -304   
528    208    
-352   -144   
-272   -208   
-112   -320   
704    32     
-32    752    
-128   336    
-112   64     
-432   -32    
176    -496   
160    -384   
-304   784    
256    880    
-224   384    
96     400    
272    224    
-400   -352   
240    0      
144    432    
-704   368    
64     -336   
-288   -320   
240    272    
-144   -32    
-176   -224   
224    -416   
-272   -96    
192    -16    
128    368    
0      112    
32     784    
16     96     
-160   496    
64     752    
-144   128    
16     96     
528    1328   
-1040  96     
-352   -288   
960    -416   
-240   -384   
64     336    
-192   416    
48     688    
176    -272   
-176   208    
96     -128   
-288   -32    
144    320    
112    256    
-240   -64    
-304   -288   
144    16     
-480   496    
176    416    
224    -64    
-624   304    
160    64     
384    320    
-464   -480   
-208   -80    
544    -208   
-192   0      
-144   176    
0      176    
-512   -624   
1728   1168   
-384   544    
-752   -288   
32     112    
-736   -208   
272    176    
144    -96    
272    496    
-928   -16    
224    0      
464    -32    
-288   -48    
-112   48     
-96    480    
416    144    
-448   -208   
-112   240    
448    208    
-608   384    
-240   -96    
-224   -960   
448    -176   
224    192    
-720   48     
560    288    
-256   64     
112    0      
-224   -64    
-48    64     
80     0      
304    160    
-240   -48    
-448   224    
80     32     
-96    -16    
-32    368    
-512   224    
-16    -80    
176    -256   
-208   -16    
32     160    
192    128    
32     112    
-80    -112   
-320   144    
560    64     
-560   160    
432    32     
-96    128    
160    -544   
-1024  -720   
96     -192   
400    192    
144    400    
-912   -192   
1008   0      
96     32     
-272   96     
144    -64    
192    112    
-32    -112   
-208   224    
368    144    
-272   208    
-336   64     
448    80     
-176   -144   
-416   144    
0      128    
112    112    
256    416    
304    -464   
-2112  320    
1504   432    
224    -256   
-1952  320    
1280   160    
-848   -16    
-160   -112   
176    -224   
-80    176    
96     -80    
-16    160    
80     160    
48     -32    
-368   128    
208    -64    
-48    16     
-80    320    
48     16     
64     80     
-624   -496   
576    16     
176    48     
-960   304    
1072   304    
-192   -208   
-272   -784   
272    320    
240    192    
-464   144    
0      -80    
-96    96     
208    -80    
624    352    
-48    -208   
-288   -144   
272    -144   
-224   -48    
-80    256    
288    64     
-240   32     
144    96     
-144   -32    
-32    -272   
-176   144    
544    80     
-272   16     
48     48     
-16    768    
1264   -1200  
-880   1232   
736    -464   
-112   -32    
-464   464    
224    -80    
272    112    
208    32     
-448   -176   
336    208    
-112   160    
-176   160    
592    80     
-496   48     
16     -80    
-176   208    
400    -16    
-48    128    
-416   -336   
-64    448    
112    896    
112    416    
464    80     
-256   -416   
-320   208    
384    -240   
-400   176    
144    176    
368    -32    
-400   192    
80     -192   
80     272    
-112   96     
-16    -112   
256    -160   
-128   -288   
32     432    
-96    352    
16     160    
208    112    
-208   0      
336    -288   
208    -64    
-384   512    
496    816    
-144   512    
32     960    
176    0      
-384   -384   
400    80     
-432   -16    
432    -384   
-144   448    
240    560    
240    304    
-304   160    
496    1856   
672    1776   
-32    768    
128    208    
32     336    
-80    224    
-48    -32    
192    192    
32     144    
-32    -752   
0      -240   
-32    272    
0      80     
96     -48    
-192   -432   
48     384    
80     208    
-432   560    
288    176    
-464   -128   
432    192    
240    96     
-544   -240   
96     144    
-64    -848   
592    -1072  
-64    144    
96     16     
80     48     
16     -32    
416    -48    
-464   176    
-48    432    
32     576    
64     0      
64     -96    
-16    0      
272    -80    
-336   64     
80     48     
224    112    
-16    -528   
0      64     
-208   -48    
736    -208   
-1456  64     
832    -32    
288    -304   
-384   -240   
112    208    
-144   16     
192    32     
112    240    
64     128    
-224   -80    
-48    -16    
32     -352   
-128   560    
240    -704   
-96    64     
-64    0      
48     208    
144    -112   
-80    16     
-208   48     
-208   112    
80     240    
208    0      
-288   160    
48     -416   
64     -16    
-288   -32    
384    128    
160    -752   
-1504  1328   
2320   -512   
-352   -80    
-1056  -112   
1248   -112   
576    -272   
-672   1248   
624    -576   
-496   -688   
-144   -624   
128    288    
288    400    
-368   -720   
64     672    
176    -80    
96     368    
-128   112    
256    480    
128    -224   
-112   288    
768    1216   
-624   -880   
-1024  144    
1264   0      
-720   592    
-48    800    
688    1264   
-96    2176   
256    1552   
-80    -1216  
-224   -48    
176    -112   
96     512    
80     160    
-16    16     
64     32     
32     -528   
-224   -1280  
208    -880   
-32    -96    
-272   96     
176    0      
-16    16     
224    -64    
-528   -384   
688    -592   
-288   -944   
976    -1536  
-640   -912   
80     496    
288    -32    
-576   160    
336    -608   
0      320    
-352   -2256  
0      240    
144    -48    
-16    -496   
272    -32    
-128   -560   
-16    -288   
-112   320    
-288   -352   
560    -16    
-176   -416   
352    -272   
-144   64     
-32    -384   
832    80     
-336   -864   
-1120  864    
336    624    
-416   -112   
-416   1344   
1056   896    
-304   0      
-32    32     
544    -368   
-432   0      
-320   -336   
144    240    
-160   -144   
80     -384   
-160   -272   
192    16     
-48    -48    
112    -480   
400    -64    
-736   -80    
160    1280   
336    1040   
-192   272    
128    -256   
960    144    
-960   -192   
-240   32     
-1184  272    
320    368    
0      240    
-48    -32    
48     160    
64     -144   
-16    -240   
256    -160   
400    144    
-224   -400   
-416   -432   
384    -96    
-16    -272   
-16    -128   
-80    -160   
-288   96     
240    48     
-144   16     
224    -144   
32     -128   
-736   -400   
368    272    
496    -896   
-240   64     
-208   32     
64     992    
896    -80    
-544   -480   
-704   48     
1024   -96    
-240   144    
-240   -96    
-1104  -416   
-592   -80    
432    -112   
-16    -144   
48     224    
96     -480   
-352   -240   
752    -208   
192    80     
-384   -272   
336    480    
80     128    
-16    -320   
-64    480    
-32    304    
-112   64     
80     -176   
-176   -32    
-304   192    
304    96     
112    -432   
-16    80     
400    -2112  
-2576  1872   
1776   -48    
-80    112    
-368   -128   
176    -320   
-240   -416   
-256   -32    
432    416    
208    48     
-336   16     
-320   48     
256    -16    
368    -256   
-592   432    
-192   -304   
256    16     
-528   224    
160    -48    
-80    32     
736    1104   
-1712  224    
256    -304   
1136   16     
-704   -80    
160    -16    
-272   -128   
144    -96    
-128   -80    
544    -48    
-464   160    
-272   -208   
-288   320    
848    -80    
-336   -80    
-192   16     
0      -16    
160    336    
-432   -32    
-64    -80    
16     32     
-992   -64    
160    64     
-544   32     
-1024  -256   
-272   176    
16     -240   
-112   160    
-736   16     
-64    -48    
2960   416    
-1392  -1936  
-1520  -96    
1472   -208   
-352   32     
-944   400    
352    -160   
768    608    
-448   -688   
-560   96     
192    16     
144    112    
-96    -112   
96     64     
-416   -240   
-464   32     
176    -48    
-192   -272   
32     -80    
-96    -80    
-80    -112   
928    704    
560    224    
-1056  480    
-256   688    
544    80     
-704   400    
672    -192   
0      368    
-576   -64    
0      96     
16     64     
0      112    
48     208    
-208   -224   
-224   144    
64     -144   
48     272    
-112   256    
-128   -32    
-64    128    
144    -352   
-960   272    
336    -224   
-352   0      
384    80     
224    80     
-944   -192   
416    384    
112    -128   
-48    96     
-224   -528   
-352   0      
160    512    
128    -416   
-608   224    
240    -304   
-352   0      
-32    144    
48     144    
-160   64     
-48    16     
-352   -256   
-64    80     
-64    -144   
-336   224    
368    -176   
-32    -16    
-304   -208   
240    -1744  
1232   -3168  
-432   864    
-192   272    
-816   192    
0      -336   
336    -288   
-80    704    
-464   -368   
176    208    
352    -16    
144    224    
-320   208    
368    -48    
-400   48     
208    -224   
-240   176    
240    -144   
-48    400    
160    1136   
-64    976    
16     432    
64     -256   
48     32     
-400   384    
480    -80    
-304   224    
48     560    
272    -48    
-256   -800   
416    -368   
-128   656    
48     288    
-224   -352   
208    80     
16     48     
-32    576    
176    320    
-32    96     
-32    64     
-48    -256   
-544   -576   
240    -432   
224    -336   
128    -1024  
-320   -1232  
-96    -304   
-368   -464   
-448   -64    
480    288    
48     32     
-224   48     
48     -560   
-1008  -384   
880    -656   
-432   -336   
-288   -272   
32     -96    
592    1296   
-224   304    
-176   -208   
288    576    
-96    -144   
80     96     
272    320    
-64    48     
-48    -48    
16     160    
-224   -112   
32     112    
-112   128    
48     32     
-80    64     
-160   64     
-32    64     
128    48     
-192   512    
176    -64    
-288   0      
112    -64    
160    128    
-128   32     
128    -64    
-400   32     
1008   48     
-48    0      
-256   80     
80     48     
288    -80    
320    -320   
240    96     
-448   256    
80     -80    
128    48     
-80    32     
160    64     
-272   0      
0      -224   
208    32     
208    144    
-64    144    
-768   160    
752    48     
-512   -64    
144    304    
240    384    
-96    -480   
400    -656   
-192   64     
-80    320    
-272   128    
128    160    
64     432    
-96    -208   
-112   -144   
-224   144    
224    240    
448    144    
-368   -128   
-160   32     
112    96     
96     -48    
-80    16     
112    48     
-336   80     
192    0      
272    192    
64     288    
-272   176    
-64    16     
-80    -656   
2192   -1040  
-1552  560    
480    688    
160    544    
-576   -304   
560    -1504  
592    0      
-400   2128   
352    -240   
96     -368   
-64    0      
384    112    
-48    -32    
-352   304    
288    48     
304    336    
32     848    
-304   16     
80     -496   
96     -64    
-672   176    
2064   -304   
-784   -288   
-480   -720   
48     704    
48     96     
-432   64     
272    -512   
144    -1840  
112    -448   
240    368    
32     32     
192    -32    
-448   -32    
576    368    
352    -128   
-432   176    
80     224    
-384   -64    
288    32     
32     -144   
192    -112   
-304   -1248  
1744   -2016  
304    -416   
-912   288    
624    336    
96     -352   
-304   176    
592    400    
112    80     
-272   -64    
-16    -368   
-32    272    
560    912    
832    -80    
-576   -672   
416    240    
320    288    
0      -240   
-352   288    
464    0      
32     288    
-192   240    
-208   -736   
80     144    
368    144    
-576   112    
-400   -192   
128    -2192  
1552   -2608  
-480   272    
224    528    
-688   -16    
-80    304    
720    -112   
64     480    
-544   -976   
352    96     
32     -96    
192    176    
-272   -128   
-64    336    
272    -16    
256    32     
-400   96     
224    -32    
-480   -384   
1040   -592   
-320   -64    
-64    -224   
48     256    
-608   -64    
352    64     
368    32     
-352   112    
-48    -16    
160    128    
-128   0      
304    128    
-64    16     
-320   -304   
672    384    
-272   176    
-112   160    
336    -16    
32     -400   
-16    -160   
80     160    
0      224    
128    80     
-96    96     
128    16     
-288   224    
80     -1296  
240    -160   
-416   -480   
272    16     
-16    32     
112    112    
-64    -704   
656    -288   
-496   192    
240    160    
0      240    
-160   -128   
-288   -32    
432    -2112  
144    368    
192    -112   
-176   128    
272    -32    
-48    -64    
-160   -160   
272    176    
-16    -400   
0      64     
160    224    
-160   -336   
64     64     
-16    -592   
48     -16    
-352   -160   
240    -720   
-256   -48    
-144   112    
304    -320   
-176   -2224  
112    -48    
96     80     
-624   1136   
2400   -816   
-1200  304    
-944   -272   
1008   256    
288    -192   
-272   -240   
-592   112    
624    -736   
32     192    
-96    -336   
224    -352   
-64    -224   
0      176    
336    -96    
-16    240    
16     -208   
-16    -240   
144    -160   
32     128    
-336   -608   
624    -448   
-512   192    
-48    0      
464    -16    
-224   -240   
384    -400   
-288   -112   
-64    64     
208    -160   
224    176    
-112   -384   
-128   -32    
32     -96    
256    48     
-320   0      
64     -176   
128    64     
-272   -80    
-96    -32    
368    -144   
0      -16    
-496   -176   
160    -80    
336    -816   
-32    -128   
-224   -1376  
-80    -32    
-80    96     
1168   -416   
-1952  -208   
-32    -560   
688    160    
-336   -432   
-720   32     
816    -96    
-976   704    
-320   352    
224    320    
160    -656   
-256   -16    
-128   -864   
64     64     
80     208    
576    80     
-528   64     
0      -336   
-80    0      
288    0      
-368   48     
576    1040   
-2256  -576   
-528   -112   
896    -112   
240    -208   
-144   672    
-96    -240   
48     192    
160    -80    
-16    -144   
-160   64     
-80    48     
240    16     
192    272    
32     -176   
-448   -64    
208    64     
48     -256   
176    -208   
-272   -112   
64     160    
16     -496   
-560   96     
-176   -1616  
688    448    
-112   144    
-48    -160   
-240   112    
-80    -16    
-240   -304   
-48    0      
784    496    
-32    -224   
-560   -400   
784    336    
-528   400    
-32    -624   
432    -80    
-416   128    
0      96     
-96    48     
224    48     
-80    0      
-176   48     
112    272    
-32    -96    
-384   128    
496    -16    
256    160    
-1008  912    
1088   2448   
480    -32    
-1904  16     
-400   192    
1408   576    
-240   1584   
-480   -528   
-16    80     
0      -288   
-96    1040   
384    128    
-416   -384   
-368   -432   
128    -48    
-112   -96    
192    -160   
128    -144   
-256   -112   
128    -496   
-288   32     
128    336    
-176   -16    
80     -320   
192    -848   
32     -432   
-64    -128   
-192   -688   
-832   -1120  
112    240    
368    256    
-16    352    
-416   -224   
-32    -192   
144    240    
160    -480   
16     -48    
-272   16     
-224   -960   
-192   -304   
-96    432    
-176   -64    
80     -32    
-16    -240   
-256   -144   
64     -16    
32     -1456  
-384   -640   
288    400    
128    416    
-80    256    
-384   -96    
592    48     
-32    384    
-480   512    
480    192    
-64    176    
-16    -400   
336    -1216  
208    -416   
-608   848    
176    272    
-80    -144   
256    192    
-80    176    
-320   -80    
64     -160   
-64    -480   
-256   -416   
-400   304    
336    64     
-464   -16    
192    192    
-64    -64    
-32    48     
224    160    
-512   336    
80     224    
544    32     
-368   -64    
-192   80     
-144   -176   
576    -80    
112    464    
144    -224   
-304   256    
-32    16     
-64    -176   
576    -368   
-32    400    
-256   304    
272    -64    
-96    96     
-144   304    
208    192    
-112   16     
128    16     
-144   240    
64     336    
80     -144   
32     -48    
160    -384   
-1200  0      
608    128    
32     224    
224    -112   
-400   -144   
-80    -208   
304    96     
-144   -352   
64     80     
80     272    
-272   -80    
-96    -64    
-144   -368   
176    -272   
176    -128   
-192   -128   
-144   -272   
144    896    
544    544    
-176   160    
-576   -352   
144    -32    
400    192    
0      32     
-256   160    
-48    80     
-128   -128   
-144   384    
272    144    
-416   1168   
1616   576    
-656   -592   
-96    -1056  
528    -64    
-384   -288   
-176   -48    
672    368    
-432   0      
-208   208    
256    16     
-64    176    
-112   208    
-128   160    
304    192    
-112   -48    
-224   192    
208    352    
-80    144    
192    16     
384    1456   
-1168  -304   
-624   96     
928    -32    
-96    -384   
-192   160    
0      176    
96     80     
-96    16     
-208   320    
640    -64    
-224   256    
-336   -48    
176    -128   
368    256    
48     0      
-320   -128   
0      176    
512    128    
-128   48     
-96    96     
-192   -256   
896    192    
-464   128    
144    144    
224    896    
576    64     
48     1216   
432    736    
-432   -32    
256    32     
-192   -176   
-128   128    
176    416    
-192   0      
96     608    
-368   160    
48     -176   
-32    128    
144    32     
16     80     
-352   48     
-16    64     
-64    80     
304    240    
-304   48     
-240   144    
288    16     
112    208    
-672   1424   
1040   3408   
624    528    
-1312  -224   
-432   144    
704    16     
-96    80     
-112   -128   
144    160    
-384   416    
640    496    
192    -80    
-368   96     
-160   -48    
464    128    
48     80     
240    208    
-544   32     
0      0      
64     528    
864    112    
-1088  192    
304    128    
704    -80    
-112   -64    
-304   112    
464    144    
-208   48     
0      112    
512    160    
-448   16     
-288   240    
448    -112   
0      80     
48     -144   
80     -208   
-64    0      
-208   -2288  
160    -128   
-416   144    
176    16     
-64    112    
368    96     
-224   144    
-32    304    
416    160    
224    384    
-320   -64    
-16    96     
176    16     
-176   -160   
64     -16    
-64    -1776  
368    144    
448    1088   
528    272    
-448   272    
240    240    
512    336    
-272   96     
-160   208    
400    64     
-192   80     
-48    128    
128    160    
192    -144   
-48    464    
-48    112    
400    96     
128    -512   
-304   80     
16     112    
320    272    
-416   -384   
176    336    
-16    -112   
416    -800   
-688   160    
272    256    
-16    -592   
64     -496   
-1040  -2528  
112    -224   
1088   144    
-1104  -1040  
1040   480    
-288   -304   
-416   160    
0      -384   
288    -48    
224    16     
-560   560    
128    -304   
0      -112   
176    -224   
-112   -32    
16     384    
48     -192   
240    320    
160    -64    
-240   -16    
576    64     
-1152  176    
288    400    
736    -192   
-592   64     
240    160    
-224   48     
160    -368   
-32    160    
112    112    
-432   256    
112    192    
320    -16    
-192   32     
-208   -16    
-32    -96    
208    80     
144    96     
112    272    
-32    112    
-64    48     
256    32     
-384   -592   
288    128    
-16    -208   
-256   240    
480    -480   
-272   160    
-80    128    
-464   -1376  
2384   -64    
-1952  336    
-192   -64    
1296   176    
-1600  -32    
608    -128   
608    288    
-400   -128   
-112   -32    
-16    32     
272    144    
-240   -144   
64     144    
-192   -272   
288    192    
16     -624   
-192   -16    
160    16     
96     -1232  
-64    0      
288    704    
-368   -1696  
-1152  224    
736    192    
368    -304   
-160   -96    
-336   208    
320    16     
-112   -192   
32     64     
-272   48     
224    -320   
144    32     
-112   -240   
-336   48     
-752   -112   
80     -1168  
0      -192   
0      -64    
-256   160    
-16    -656   
112    -80    
-272   -96    
-32    -112   
224    -592   
-48    128    
192    224    
672    -16    
-272   -336   
-192   480    
272    -224   
-272   224    
224    -176   
416    544    
464    -720   
-416   528    
64     176    
-160   -32    
528    -64    
-112   96     
-208   96     
-16    -32    
352    112    
-32    -128   
64     320    
-208   -272   
80     48     
80     -400   
-416   -1264  
-320   -16    
-640   1696   
544    -80    
-32    -816   
-16    256    
912    608    
-48    960    
-544   -496   
-16    -976   
224    464    
-48    -560   
-368   -304   
16     -144   
-432   32     
288    -416   
64     176    
-64    736    
-64    16     
272    -384   
0      -352   
-32    -1808  
-144   384    
288    -192   
-96    -272   
64     -48    
-32    496    
-80    224    
176    176    
-16    144    
64     -80    
-80    720    
80     -336   
-256   304    
160    -304   
144    160    
-336   -384   
160    -528   
224    784    
400    176    
-448   -752   
-112   -496   
480    -128   
112    176    
-64    -144   
-288   128    
-240   112    
144    -560   
-1168  -160   
96     -272   
208    448    
160    -256   
64     352    
352    -480   
-832   -976   
96     -1264  
-112   -1344  
96     512    
304    1216   
-32    1504   
320    -384   
-64    -624   
-240   -384   
-224   160    
-32    -128   
464    432    
64     -800   
64     208    
-768   224    
80     16     
240    0      
-272   48     
-16    -16    
-96    112    
-112   16     
-176   0      
48     -320   
544    -736   
160    -96    
48     -432   
-80    -192   
-32    -304   
912    400    
-1312  752    
560    -480   
-112   -176   
-352   272    
80     368    
752    176    
-784   144    
-128   288    
384    144    
80     -272   
48     0      
-656   -352   
-304   464    
-144   32     
-160   96     
-368   208    
-800   160    
-96    176    
-592   128    
320    576    
-48    352    
-464   -96    
96     448    
-240   -192   
-800   352    
-16    -208   
-336   -640   
-80    -80    
-16    480    
64     -112   
-80    -688   
32     -272   
144    496    
-480   -528   
160    352    
-352   -384   
-32    0      
384    -64    
32     0      
-32    -288   
-96    352    
192    -112   
-16    -48    
224    -32    
-448   16     
-64    80     
224    48     
-160   -288   
1200   -112   
-2256  240    
208    -672   
352    -128   
-1440  -224   
1296   80     
-320   -512   
-656   -64    
400    -320   
144    288    
-192   -32    
-192   0      
240    32     
240    256    
-880   -112   
208    192    
-16    -16    
-368   -496   
-144   -192   
-864   -128   
64     160    
464    112    
-1760  448    
608    -144   
-208   288    
-336   -304   
496    336    
-128   208    
-288   48     
-32    112    
352    -32    
-64    -112   
-240   128    
-32    128    
64     -112   
-64    176    
80     -112   
-368   -112   
-16    176    
-352   320    
128    112    
400    -48    
80     736    
-1344  336    
-208   -272   
512    224    
224    -16    
-80    288    
-928   -480   
-400   -96    
384    32     
-240   -80    
-128   160    
-192   64     
416    -48    
272    144    
-528   304    
-272   208    
256    592    
-272   272    
112    32     
272    -48    
-608   32     
16     80     
192    64     
480    32     
-1120  272    
320    -320   
-544   80     
-512   -848   
3232   1680   
-1984  1696   
112    368    
592    64     
-672   32     
416    -48    
-464   288    
-304   -368   
-48    176    
464    -384   
-272   240    
-512   -16    
-96    176    
240    16     
144    -80    
-528   144    
128    160    
-288   64     
16     -80    
448    1008   
304    -48    
-864   320    
528    32     
-576   -48    
-96    192    
1040   48     
-992   -176   
-80    64     
208    96     
64     16     
-160   64     
64     0      
144    32     
-160   304    
16     -144   
-448   160    
544    -32    
32     192    
-112   80     
-448   -64    
448    64     
-288   -48    
96     192    
208    352    
-336   32     
32     160    
528    -480   
-1008  -272   
416    32     
-224   208    
368    144    
0      -288   
192    0      
48     48     
-256   16     
496    80     
-192   112    
-96    368    
-96    352    
224    96     
160    176    
32     80     
-48    32     
-208   112    
256    80     
80     -48    
32     208    
-368   352    
496    256    
-480   -208   
-128   16     
176    48     
16     -80    
96     0      
16     192    
64     240    
-16    -48    
16     -48    
240    576    
-224   416    
-208   288    
1520   3184   
1120   128    
-1776  560    
448    -80    
256    -240   
-224   64     
160    -16    
128    704    
-144   -32    
144    -272   
272    -48    
-224   176    
-32    -112   
48     -96    
416    -240   
-128   496    
64     -16    
-224   112    
192    0      
96     80     
320    -480   
-1104  752    
960    -624   
-160   -288   
-16    176    
240    48     
-256   480    
-272   320    
80     368    
496    160    
-64    16     
-432   -256   
96     -96    
-16    128    
240    -800   
112    192    
112    48     
-304   224    
48     112    
128    -128   
-96    -96    
400    -224   
-304   -16    
288    192    
-240   -192   
32     256    
-48    0      
-16    -224   
192    16     
-384   -2352  
2112   -752   
-1376  560    
112    96     
784    352    
-880   208    
528    176    
272    912    
32     496    
176    432    
-416   192    
176    256    
48     144    
128    -128   
208    -48    
-128   -624   
64     160    
192    32     
-176   96     
-16    -48    
160    144    
240    -208   
-2000  880    
1264   0      
-240   -48    
-752   -272   
1056   624    
-1088  1120   
176    96     
304    -128   
64     -160   
208    48     
-496   -2192  
112    176    
272    32     
80     512    
32     -240   
48     192    
-128   672    
368    608    
80     176    
-48    144    
16     256    
400    1232   
-864   1376   
32     176    
656    -32    
-288   -128   
656    -16    
-64    32     
-80    -416   
-192   224    
272    -160   
160    32     
-80    48     
448    -432   
160    -176   
0      32     
256    -512   
-224   192    
-48    368    
-144   -64    
224    -176   
160    384    
48     112    
-128   0      
560    16     
272    288    
-528   560    
272    336    
160    192    
-880   -2112  
-880   160    
-432   608    
608    -208   
432    -16    
-512   -624   
-112   -320   
-256   944    
272    -512   
240    -256   
80     640    
-368   -752   
-384   128    
272    -48    
448    256    
-272   -848   
-288   320    
-272   -368   
432    -256   
176    -32    
-176   1008   
-240   -416   
496    -208   
-32    -784   
-256   736    
208    240    
-192   176    
816    1168   
32     1616   
-96    -1392  
-80    -448   
-96    -832   
496    224    
-64    448    
-272   -160   
32     -256   
272    384    
-256   -48    
272    -272   
-224   -880   
32     -48    
144    176    
48     -96    
-1152  -480   
-272   -1360  
448    528    
-416   -1840  
192    -704   
-512   -704   
32     240    
80     -576   
624    -720   
-704   -1520  
-288   -128   
192    -272   
176    -32    
-64    -896   
160    -1440  
-1056  832    
288    1344   
-32    -96    
-32    -112   
160    -80    
144    -208   
80     576    
-560   336    
112    -112   
432    -784   
160    384    
0      192    
-496   -208   
176    -320   
416    -288   
160    16     
128    -560   
-336   -1392  
-400   -1056  
480    640    
352    -16    
48     -48    
416    -736   
-1296  592    
192    112    
432    1280   
-656   1376   
-608   304    
480    -832   
96     -464   
-48    192    
-80    -48    
-384   96     
32     -432   
192    -64    
-80    -800   
-464   544    
304    16     
-16    320    
-128   -816   
-80    32     
-48    -304   
496    -400   
-336   512    
-32    -544   
-352   -896   
256    48     
-1232  -224   
176    -464   
-176   -272   
96     16     
64     80     
-160   -96    
-128   16     
224    -640   
-128   64     
32     -80    
128    -688   
-464   -384   
-96    -224   
336    -96    
-80    -64    
-240   -16    
288    80     
-128   64     
96     -96    
-544   -96    
464    -352   
0      240    
96     -160   
-160   208    
-688   -624   
1504   -864   
192    -304   
-720   -560   
224    -48    
912    240    
-1008  -64    
-112   192    
352    256    
-640   -320   
48     144    
256    -240   
-16    96     
0      -608   
-96    208    
464    -16    
-32    96     
48     -96    
-448   -160   
80     80     
-80    -16    
-144   160    
-80    240    
1536   96     
-768   -32    
-80    48     
-128   -144   
464    112    
-32    -192   
-160   384    
32     96     
-224   16     
112    80     
240    80     
-192   -64    
48     48     
112    -16    
16     224    
-240   -128   
160    208    
336    224    
-512   -224   
528    928    
-1152  -304   
-416   -496   
1104   112    
272    752    
-448   -48    
-208   -320   
384    -448   
224    32     
-208   -16    
-320   0      
80     16     
944    48     
-112   544    
-1536  -192   
-128   128    
224    -368   
448    96     
-512   -32    
-592   -16    
-16    -528   
-112   -32    
-304   32     
-560   -128   
768    -352   
-32    -224   
512    -240   
-32    32     
-1440  -1904  
624    -144   
896    -592   
-1008  -1920  
304    -32    
640    224    
-368   -240   
-800   224    
256    -128   
272    288    
-576   32     
-336   0      
608    -160   
-256   208    
-208   -64    
176    272    
-16    16     
-208   112    
688    -32    
-336   -288   
-1264  -32    
1200   -144   
-400   96     
416    -96    
-448   -112   
-784   32     
320    -96    
-512   32     
208    -112   
64     80     
-160   -144   
-192   64     
272    -128   
-160   176    
384    0      
32     48     
-176   32     
32     144    
112    -16    
-384   112    
-80    0      
-16    16     
-16    176    
-192   -96    
-32    -128   
432    16     
-176   -160   
-112   128    
288    512    
-160   352    
-48    608    
-48    160    
-256   432    
512    -112   
-480   -16    
224    -48    
-64    256    
-368   16     
288    -32    
-64    -368   
-560   144    
176    16     
176    80     
16     176    
-176   -32    
-64    -128   
-64    64     
160    -32    
-416   -240   
304    -240   
-64    -176   
-32    -96    
-272   224    
-368   416    
-64    -16    
288    336    
368    -80    
-400   -192   
0      -512   
192    -144   
0      -80    
992    1424   
-2640  1568   
1424   64     
464    -480   
-912   -1296  
-304   -928   
-272   -608   
64     496    
-192   144    
80     352    
-384   304    
-144   368    
288    256    
176    48     
-416   208    
-144   112    
320    -64    
-64    -160   
64     -96    
-208   0      
-112   -256   
368    -528   
0      1040   
464    -16    
-480   656    
304    -32    
-32    -48    
304    -352   
-352   304    
176    -160   
-32    320    
16     -16    
-64    192    
80     16     
-80    304    
-32    -416   
208    288    
-48    208    
16     -224   
32     416    
-16    -32    
32     400    
320    384    
-80    -304   
16     -64    
-336   224    
-32    192    
112    -272   
240    -80    
-96    192    
-1456  -704   
992    736    
912    -512   
-1488  1152   
1056   496    
672    672    
-1072  336    
208    1424   
192    -288   
-160   -848   
112    336    
-48    336    
-192   -96    
160    16     
240    32     
0      336    
-176   64     
96     176    
-32    80     
64     0      
720    1424   
-816   -832   
-2112  288    
2432   -1104  
-400   -864   
-800   368    
720    240    
208    -224   
-208   144    
-80    192    
-112   160    
-336   32     
128    208    
304    320    
-48    304    
-272   96     
304    320    
-144   736    
336    1376   
480    320    
-336   32     
-208   -256   
144    48     
-400   -816   
48     -208   
304    784    
-672   -160   
-32    -160   
496    256    
-352   160    
352    -656   
208    80     
384    -64    
-560   160    
368    432    
-368   16     
-224   1152   
656    48     
-1056  -528   
16     -416   
80     0      
-16    -32    
16     -496   
-544   -400   
48     160    
192    80     
192    -48    
-272   -288   
-64    -176   
464    240    
288    -576   
-2560  -640   
1248   1008   
608    1232   
-368   -64    
16     128    
-176   1168   
48     -960   
256    160    
-32    -224   
-112   432    
-368   -496   
224    -320   
320    368    
-448   304    
160    480    
272    176    
-208   -576   
16     -512   
-48    416    
48     528    
32     80     
464    256    
-80    320    
-544   16     
832    -256   
-464   -272   
656    304    
-128   1504   
560    800    
-160   -224   
-240   -96    
-128   -592   
112    96     
64     176    
112    224    
-112   -672   
-720   -1152  
304    -176   
112    -2224  
-448   -176   
112    480    
-16    736    
320    -48    
-208   -592   
64     384    
-432   -240   
-48    176    
496    352    
-192   -272   
-272   -1216  
544    -768   
-576   -64    
32     -1424  
1056   -1344  
192    400    
-400   1312   
336    -192   
128    -736   
-336   -864   
-288   112    
112    -80    
160    -288   
-128   400    
272    848    
-32    336    
224    304    
144    -96    
-176   32     
96     560    
560    416    
-160   -1008  
-144   272    
64     208    
320    -80    
-416   -720   
240    -736   
16     -64    
32     288    
48     128    
880    1664   
-2144  1984   
800    -848   
416    -96    
-320   -576   
-160   400    
208    -32    
-112   48     
368    -528   
16     -48    
176    -160   
-96    96     
96     96     
-48    320    
96     -240   
96     -112   
272    448    
-208   -96    
96     112    
16     -272   
672    -272   
-848   304    
672    32     
-560   -160   
-48    128    
416    -64    
-336   112    
16     128    
-112   384    
656    -32    
-416   -96    
128    -16    
-16    160    
240    192    
-80    -32    
80     144    
-160   -96    
80     336    
0      80     
272    -1072  
-320   -16    
-16    80     
32     -800   
16     96     
160    -2576  
128    16     
-128   16     
-80    -96    
224    192    
-848   -1120  
2192   -592   
-1632  -832   
-608   -608   
736    32     
-96    0      
176    112    
-1488  96     
224    -240   
96     -112   
-112   -656   
16     -112   
48     -336   
160    -160   
176    192    
-304   -320   
224    -1392  
-32    0      
-144   -240   
208    0      
16     -96    
-32    -624   
736    400    
-1008  -336   
-352   -816   
336    -272   
272    112    
-384   -176   
288    -384   
336    -128   
32     16     
-480   -64    
-208   176    
368    -32    
80     -16    
224    16     
-144   -304   
-528   16     
-256   -256   
96     -96    
496    -272   
-432   0      
-224   -560   
272    -64    
192    -1776  
-352   496    
784    -64    
-432   960    
-752   384    
-96    -464   
-96    -48    
576    0      
-800   160    
-352   -288   
-224   -80    
496    -192   
-208   176    
-400   16     
-128   16     
448    448    
-240   144    
-272   -992   
96     0      
-48    -240   
128    64     
112    224    
-176   224    
128    -32    
112    -208   
-128   96     
-32    1104   
1072   -1248  
-752   928    
928    -128   
384    -784   
-1168  384    
544    -2144  
800    -128   
-880   0      
80     -272   
-128   128    
320    -16    
-304   -48    
320    -48    
-304   -144   
-112   96     
144    -48    
-112   -160   
-208   -96    
112    16     
592    320    
-640   -96    
272    48     
64     128    
-240   16     
-48    -80    
320    16     
-672   -32    
80     96     
224    64     
192    256    
-384   -80    
48     -416   
-128   32     
352    -96    
-304   432    
160    80     
48     80     
-320   -96    
80     0      
-192   0      
144    -192   
-128   -160   
-48    -176   
-160   -64    
-208   -96    
176    160    
-256   32     
176    240    
384    0      
-480   -144   
-48    -896   
352    -608   
-224   704    
128    800    
240    1520   
464    624    
-512   -304   
144    -176   
128    -160   
-176   -400   
-384   -432   
640    -864   
-224   -448   
-464   -448   
112    -256   
-416   -176   
-320   -96    
32     -384   
-528   -272   
16     288    
-192   368    
96     112    
-96    -64    
-304   -96    
0      -96    
224    -96    
-96    528    
-48    64     
-288   0      
-64    96     
-176   -1968  
-400   -144   
256    -96    
-624   -560   
352    784    
-704   -128   
-112   160    
192    -16    
-32    64     
48     224    
0      432    
-400   -368   
-64    -80    
160    304    
-96    256    
-48    128    
-240   -352   
0      240    
-112   -160   
-96    160    
432    -192   
-1264  592    
912    96     
-16    784    
-912   48     
-176   144    
-496   -576   
80     176    
32     400    
0      16     
288    -112   
-128   48     
-176   64     
48     -48    
128    272    
112    -80    
-224   -64    
-224   240    
176    -32    
-624   176    
-144   96     
-176   80     
0      256    
128    -208   
-32    -192   
-192   16     
-80    336    
48     272    
64     32     
192    0      
-1536  1280   
2912   -656   
-1200  96     
-480   704    
496    288    
0      144    
-80    -32    
320    1376   
-352   -720   
-272   -752   
256    240    
-144   496    
-176   -16    
128    80     
160    160    
-160   336    
-192   96     
208    224    
-160   0      
-256   -160   
320    32     
-2656  480    
1088   -112   
-416   16     
368    -288   
-144   48     
64     -464   
0      -48    
-48    1248   
288    1152   
-272   272    
80     48     
144    -432   
-384   -720   
640    32     
-416   192    
-512   432    
400    -1472  
-32    -336   
-128   -480   
-112   192    
96     80     
-160   576    
-336   -1568  
80     -496   
656    848    
-400   1584   
-432   656    
752    720    
-528   336    
-336   304    
-128   112    
32     32     
96     160    
-560   256    
160    240    
-16    -368   
272    560    
-576   144    
-176   304    
96     -144   
-176   160    
-96    -704   
-528   32     
192    64     
112    -176   
-32    112    
0      -480   
-352   -384   
-16    64     
-1056  1712   
160    304    
-96    -48    
-208   -256   
288    944    
32     544    
-400   544    
96     -464   
384    640    
128    -176   
-128   -704   
-112   96     
128    448    
176    0      
160    -64    
-256   96     
112    64     
-96    -112   
144    112    
-112   448    
-192   240    
112    352    
560    -224   
-304   -1104  
-1424  -400   
688    -848   
-288   192    
320    -160   
-480   -368   
240    0      
-96    96     
64     256    
-128   -64    
-32    -16    
256    112    
32     96     
-32    -112   
-240   -48    
112    272    
-144   -112   
-128   288    
112    96     
-288   -592   
-64    -432   
64     -176   
304    80     
-288   368    
160    240    
176    464    
-144   112    
-48    -16    
512    1104   
-880   944    
-160   368    
624    64     
64     -880   
-752   -272   
64     384    
576    240    
256    192    
-240   336    
240    432    
-48    240    
-192   144    
336    16     
-160   -80    
-432   304    
448    -128   
112    -176   
-112   288    
-272   272    
304    -288   
-384   -192   
272    208    
112    -32    
-256   224    
240    -16    
-160   -96    
-16    80     
144    80     
1408   2848   
-3344  544    
-688   0      
1888   -1040  
-672   -64    
-32    -272   
-144   192    
400    -64    
272    -752   
-416   560    
80     -64    
-320   272    
480    160    
-96    320    
-208   0      
192    160    
-400   16     
64     -64    
224    -160   
-208   -96    
-96    -704   
192    -864   
-528   640    
960    272    
-352   32     
-432   160    
240    -352   
48     384    
336    -224   
-544   224    
64     0      
-64    64     
32     144    
432    -288   
-448   -112   
32     -784   
16     352    
80     0      
-464   352    
720    -80    
-288   176    
-112   48     
-48    80     
16     -160   
512    -64    
-368   -80    
272    304    
-64    64     
-128   -16    
32     -624   
336    -1600  
288    1008   
496    -1472  
-928   -256   
592    256    
560    256    
-944   -80    
768    48     
-112   176    
-192   96     
-112   112    
128    32     
-16    16     
96     32     
288    0      
-192   -272   
144    32     
80     -112   
-32    -48    
224    -304   
-160   -352   
672    -160   
-464   256    
832    48     
-32    16     
-992   480    
1312   -48    
32     496    
-464   -224   
-160   112    
288    -96    
144    32     
-256   -352   
112    -16    
16     -624   
304    32     
-272   0      
80     240    
16     80     
0      80     
80     80     
352    576    
-864   -48    
192    -128   
128    144    
-400   -176   
224    144    
224    -576   
1008   256    
-656   272    
-128   112    
304    128    
-16    96     
-208   -144   
176    96     
112    112    
208    -416   
96     400    
-832   128    
256    48     
208    -128   
16     16     
-64    -48    
-80    128    
-16    -144   
432    -128   
-176   32     
16     -304   
-80    16     
-1200  -2368  
1984   -1968  
736    -928   
-1504  528    
-64    0      
832    -32    
320    -304   
-608   144    
-432   16     
608    224    
-400   -64    
240    -272   
-144   -224   
32     -1344  
144    -64    
224    0      
-288   64     
-64    48     
-112   -192   
320    -624   
-784   -1344  
144    -1312  
-160   -208   
240    272    
784    -1344  
-672   -416   
-240   -832   
96     192    
288    -272   
192    -16    
-336   32     
16     48     
0      -16    
192    -176   
176    144    
-416   256    
400    16     
336    400    
-144   208    
-160   80     
160    176    
48     144    
128    528    
-64    368    
0      416    
656    512    
-416   272    
-112   352    
400    224    
160    320    
144    256    
-224   48     
240    -1696  
960    -400   
-384   -112   
-320   96     
96     -240   
-80    -272   
240    -256   
16     416    
-80    640    
-352   -832   
-976   -304   
16     -256   
144    -128   
64     96     
-176   -96    
256    -400   
112    448    
48     -160   
96     400    
48     -128   
-176   128    
192    -32    
320    64     
-368   64     
32     -64    
-176   -608   
-592   -1136  
32     -160   
256    -48    
96     -144   
336    -256   
80     464    
-224   -1440  
96     0      
64     32     
-32    -48    
128    176    
-80    -96    
-176   0      
-16    -192   
-128   96     
176    -32    
-976   -16    
-112   -160   
272    128    
-96    -192   
192    -32    
16     -1760  
-128   160    
560    544    
-576   528    
112    -160   
368    -240   
-32    -592   
-464   304    
-304   -256   
848    -832   
304    400    
-480   -16    
-368   272    
224    -384   
288    144    
32     -112   
-224   96     
64     -80    
256    -80    
-128   -96    
16     -16    
-96    48     
112    -96    
-80    16     
80     -96    
-64    80     
16     432    
448    176    
-144   -128   
64     416    
-160   -304   
240    -288   
-1408  -528   
1232   1312   
912    -528   
-1536  832    
816    768    
560    384    
-384   560    
16     160    
-272   1504   
384    336    
-80    -416   
-192   -176   
64     -64    
-48    -480   
-336   -272   
-16    -80    
-64    112    
-192   -288   
288    448    
16     -160   
304    224    
-2144  -256   
560    0      
592    -192   
-960   -1456  
-144   -1088  
480    -192   
-128   -592   
-1152  -1136  
256    -368   
-384   128    
-160   400    
368    688    
-1104  496    
-208   208    
400    -176   
-272   -352   
288    -384   
-96    -192   
-144   0      
256    128    
-304   -208   
-336   -160   
-208   -752   
1232   -1136  
-272   240    
32     1664   
-464   480    
-384   -192   
96     656    
-320   96     
-304   -32    
-32    -288   
-128   -192   
480    -96    
-128   224    
-1232  464    
368    368    
-448   256    
304    -144   
-368   80     
-368   -16    
272    448    
416    -64    
-144   16     
-560   96     
-112   128    
-160   0      
-160   752    
-288   -1296  
928    -352   
32     -256   
-944   208    
-32    416    
80     -704   
-80    48     
96     -144   
-480   112    
-176   -256   
432    -272   
-272   -32    
-80    144    
-704   16     
-208   -48    
768    128    
-400   32     
-192   -240   
-240   -752   
272    -1424  
96     -832   
-144   144    
-160   256    
-128   -64    
-80    -288   
352    160    
-512   176    
544    240    
-1104  -96    
208    368    
-64    -64    
-96    176    
0      -32    
-80    368    
-208   176    
80     48     
-16    96     
400    112    
-240   176    
-64    0      
256    32     
32     -32    
-272   304    
80     160    
-400   96     
-560   -208   
384    160    
-112   128    
-128   128    
176    -160   
-448   -192   
400    96     
-128   -640   
-768   -208   
672    368    
448    -112   
-528   -112   
176    112    
-128   -400   
352    -288   
-1648  -48    
-240   32     
176    -80    
-160   -32    
144    -96    
64     32     
0      -240   
-656   160    
272    208    
256    -144   
-128   240    
-224   64     
208    208    
-32    -32    
-80    48     
-192   80     
192    256    
-224   128    
32     64     
128    32     
48     128    
-688   1168   
2944   -400   
-1408  -32    
-64    1344   
1632   48     
-800   -32    
-192   -176   
-64    320    
48     320    
176    -144   
-144   160    
80     -32    
-224   64     
352    880    
352    -80    
-592   -32    
336    16     
112    64     
-144   32     
48     16     
-656   -848   
864    -64    
128    176    
-1312  224    
704    16     
352    -64    
-624   240    
-80    -208   
352    128    
0      -128   
-128   112    
64     -16    
-32    80     
16     96     
176    64     
-704   208    
736    208    
-240   16     
160    -208   
-448   112    
496    64     
-160   240    
336    48     
-240   -112   
-192   112    
352    0      
-256   208    
320    96     
-160   144    
-992   -1312  
992    -32    
-144   -176   
-976   -16    
352    0      
176    368    
400    320    
-672   464    
416    304    
192    112    
16     80     
-240   80     
96     48     
144    48     
-304   -64    
304    48     
-416   48     
240    -16    
-16    -32    
-80    -32    
96     96     
48     -288   
-1136  160    
816    368    
-432   -16    
160    -160   
624    208    
-656   -160   
592    240    
-80    112    
0      -32    
80     96     
-112   96     
-16    112    
144    240    
240    -48    
-400   160    
32     -96    
-48    -432   
272    192    
0      288    
-160   -48    
448    32     
-112   -208   
-224   96     
464    160    
-80    608    
-448   -416   
-48    112    
352    -176   
-336   -96    
64     128    
240    160    
16     48     
32     160    
-16    -96    
128    128    
-144   80     
-112   160    
544    32     
-560   32     
112    0      
320    -464   
-144   224    
-64    -1072  
-32    96     
128    144    
16     112    
64     0      
-320   544    
560    112    
256    -1184  
-752   384    
1232   -208   
-944   0      
-512   0      
800    -160   
272    -128   
-336   48     
-272   -176   
160    288    
384    -16    
-64    272    
-192   -96    
48     32     
384    -64    
80     176    
-224   -144   
-144   16     
480    -752   
-176   -16    
144    320    
64     496    
-704   -64    
368    -688   
112    96     
144    16     
-304   -112   
240    -672   
160    -752   
-256   448    
112    160    
32     -784   
32     -336   
-16    288    
160    208    
-368   -272   
-48    -912   
544    -608   
-208   128    
-80    304    
48     -912   
352    32     
-128   400    
112    368    
112    -800   
-624   -736   
640    352    
-16    1312   
96     -80    
-144   -368   
304    528    
-912   496    
832    1008   
0      1376   
-256   784    
320    -416   
16     -192   
-96    -1488  
192    -240   
-256   -48    
208    368    
16     128    
-256   96     
240    32     
0      -48    
336    256    
-96    -256   
-16    16     
-112   128    
272    32     
-64    -64    
80     112    
-128   -320   
80     -32    
64     144    
192    80     
-128   -32    
-144   -48    
-112   160    
352    -176   
576    384    
-1408  192    
608    16     
0      -16    
176    -160   
-256   -240   
-16    896    
-16    0      
208    -160   
-160   -32    
0      -2544  
-176   -16    
112    -224   
144    -576   
-256   176    
-288   560    
-16    -80    
304    -16    
128    -288   
-96    48     
-752   272    
1008   -208   
-784   -80    
144    -2352  
208    48     
80     -1008  
80     -528   
-720   -816   
0      112    
192    224    
144    -752   
144    -320   
-144   128    
-64    512    
80     -144   
64     -240   
-208   -656   
-48    -80    
368    32     
-32    96     
-32    -32    
-192   128    
-80    128    
0      -48    
240    -352   
-496   -480   
-64    176    
64     -320   
640    -160   
-16    -272   
912    -864   
-1472  -208   
1088   -272   
-80    -704   
-976   -368   
-160   -80    
432    -368   
-256   1200   
208    1440   
-336   -704   
208    -576   
608    0      
-336   240    
-208   80     
128    -464   
176    -112   
256    144    
-112   160    
-144   -224   
144    -128   
-768   -400   
1568   -704   
-464   112    
-608   96     
592    96     
448    128    
48     -1024  
-320   -272   
544    160    
-144   -384   
-48    0      
144    -176   
416    -16    
-160   -160   
-48    -176   
304    -112   
-144   400    
-80    -48    
16     -16    
-240   -48    
16     -80    
-16    176    
416    -80    
528    -272   
0      -864   
-432   224    
336    -1840  
96     -96    
-16    352    
0      -384   
-448   240    
592    0      
-304   -64    
-288   -32    
-512   -480   
256    -368   
96     -576   
-864   80     
48     224    
320    -96    
-48    -64    
-192   -512   
-192   -272   
-368   288    
656    -256   
-640   32     
-96    -32    
-96    0      
-192   -1120  
1232   2736   
-1472  1824   
-16    -480   
1872   -176   
-688   16     
-800   -464   
224    496    
960    -1088  
-16    80     
-512   -192   
64     208    
144    176    
-48    -144   
208    32     
16     64     
-208   176    
48     48     
16     -48    
-336   -656   
784    -192   
-384   -400   
96     240    
-160   -272   
176    176    
624    -176   
-160   464    
-128   -48    
48     192    
240    256    
-16    64     
48     224    
16     -288   
-112   -32    
-208   -192   
-32    128    
368    48     
-96    0      
-1424  -864   
-752   -272   
416    -16    
32     96     
272    80     
-336   64     
-144   272    
80     -32    
-96    0      
304    -256   
-288   48     
96     80     
64     32     
16     16     
-96    -336   
176    -480   
-96    -96    
160    912    
880    272    
-992   160    
-48    80     
240    -112   
128    -304   
-160   16     
-176   32     
224    32     
-32    -272   
304    -224   
-384   -432   
96     176    
-160   80     
48     -272   
176    128    
16     32     
-400   -80    
48     112    
16     -128   
-48    272    
-272   0      
-208   128    
80     112    
-64    64     
208    0      
-320   -32    
272    2240   
2480   128    
-1616  288    
0      -192   
-208   -272   
640    128    
-192   -112   
-176   -336   
-176   208    
-16    272    
304    -336   
-208   128    
80     -224   
32     16     
400    -80    
-400   336    
0      -80    
128    96     
-240   128    
-48    0      
-480   -1312  
272    272    
416    224    
-1104  0      
576    128    
-848   -208   
-432   96     
0      -304   
112    288    
384    224    
16     64     
-464   -160   
64     48     
464    368    
-256   336    
-80    192    
192    80     
-512   80     
528    -80    
-464   144    
-112   -32    
80     224    
-16    -112   
176    208    
-64    128    
-480   192    
448    16     
-32    48     
-224   96     
1056   1472   
-992   512    
-1680  592    
1712   -96    
-256   -144   
-672   -16    
112    -48    
-112   -224   
-656   32     
416    -32    
-80    128    
-240   0      
-16    160    
416    160    
-272   32     
-304   224    
224    -16    
-192   64     
80     144    
-208   208    
-16    96     
304    896    
-1072  -592   
-1424  128    
960    416    
-80    -48    
64     128    
-240   448    
32     -80    
144    -96    
-192   16     
128    -32    
-192   112    
48     112    
64     -240   
208    144    
-400   -32    
-80    -384   
-80    256    
144    112    
-144   -208   
-160   -80    
784    784    
-16    0      
-336   -176   
272    528    
256    96     
-384   -48    
192    112    
0      -128   
-16    192    
-144   -48    
208    112    
16     192    
-128   176    
-48    -384   
704    16     
96     -32    
-384   256    
656    144    
-752   320    
80     -48    
-48    48     
144    128    
16     -64    
16     464    
-128   -208   
-352   48     
560    240    
192    -304   
-1216  -1472  
1728   -2336  
-32    128    
-464   528    
128    368    
192    -80    
448    1360   
-288   2160   
48     640    
224    -336   
-352   -112   
192    208    
-80    224    
272    144    
80     -432   
-32    -16    
-464   -640   
208    448    
-160   -224   
160    -704   
-128   -208   
32     528    
320    560    
-352   512    
-160   1184   
304    720    
-32    32     
160    -656   
0      -224   
-144   -368   
288    144    
-128   304    
176    -64    
96     -672   
-256   32     
-160   -32    
272    -112   
48     -1040  
-576   -864   
32     16     
-16    -96    
240    -144   
304    -64    
-400   -688   
352    112    
80     896    
160    -80    
-96    -16    
-48    736    
0      192    
64     384    
560    720    
-720   32     
64     -208   
160    -16    
-256   -160   
-336   368    
304    912    
272    1312   
-304   -256   
128    -768   
-16    288    
96     320    
-48    -48    
144    0      
-304   -160   
240    -48    
-160   -496   
-464   0      
240    128    
-400   -320   
384    16     
-64    64     
16     -16    
-80    80     
224    32     
-128   128    
384    -192   
-576   -304   
-192   304    
336    -32    
592    704    
-1056  544    
656    -208   
-48    480    
112    -384   
96     176    
-384   -1472  
-96    96     
352    112    
-32    0      
-192   96     
-224   352    
208    176    
-32    96     
-32    64     
-64    560    
-32    336    
-256   336    
176    -64    
-112   -208   
64     768    
336    -64    
-512   -368   
-16    -512   
176    -144   
176    368    
-112   -112   
-144   384    
-16    -64    
-96    -176   
400    144    
288    -400   
-320   32     
384    16     
-320   -64    
144    -80    
112    16     
224    0      
-384   -2240  
208    128    
192    656    
352    -272   
-32    -96    
-208   32     
-144   272    
208    304    
272    64     
-64    -32    
64     128    
1520   1072   
-1552  368    
-1376  -928   
1184   -48    
1664   -1408  
-2080  32     
1600   320    
80     -496   
-928   -464   
848    112    
16     -144   
-272   -16    
112    96     
64     -16    
48     208    
-64    16     
96     64     
80     192    
-32    272    
80     96     
-48    144    
-256   736    
2368   16     
-1616  112    
160    160    
384    32     
-576   -160   
560    -64    
64     -752   
-144   -48    
192    -368   
208    80     
80     -144   
-128   -128   
-288   -432   
656    128    
-160   -96    
-336   -32    
272    -16    
96     224    
-144   160    
464    208    
-240   144    
-224   -192   
128    384    
144    304    
-240   -48    
32     0      
-272   -144   
-192   -256   
496    16     
176    240    
-160   512    
416    224    
-32    -848   
-80    -64    
-96    -208   
0      144    
176    -304   
-272   -752   
272    96     
256    80     
-16    -128   
-64    160    
-64    -32    
-48    576    
1152   112    
-560   -48    
-528   224    
-288   -464   
-800   -1840  
-912   160    
-240   -144   
496    -96    
736    -528   
96     -288   
-992   -2384  
432    -176   
128    128    
176    -112   
96     -192   
-384   -272   
112    0      
-112   32     
-160   -32    
-208   -96    
-208   16     
240    -96    
384    496    
-896   -80    
384    464    
448    -368   
-640   96     
752    -704   
240    32     
32     -320   
-240   320    
688    -80    
-560   256    
464    -112   
-144   -64    
-32    -128   
-96    -32    
592    32     
-800   -144   
304    112    
272    -352   
-240   -32    
-96    -448   
16     208    
112    -96    
48     288    
-176   -160   
128    -96    
192    -224   
128    -272   
-576   0      
240    64     
-400   32     
336    80     
-128   48     
-272   -1040  
-368   -208   
768    -656   
-448   496    
352    160    
-112   -160   
80     -480   
16     -192   
96     -240   
-96    112    
-192   80     
256    0      
-64    -32    
64     -128   
-400   368    
16     -512   
112    304    
480    864    
400    64     
-656   -624   
64     288    
160    48     
256    -192   
-112   -32    
-160   -128   
-464   272    
400    176    
304    -448   
-320   -208   
448    -560   
-2672  1840   
1680   -192   
144    288    
176    -32    
-192   -1376  
-224   80     
48     -576   
-48    288    
80     192    
-208   -48    
-240   112    
208    -128   
288    320    
-720   464    
208    -368   
16     -64    
336    432    
32     0      
-272   32     
400    128    
-512   -352   
-480   512    
1088   160    
-320   -96    
-544   128    
-112   48     
432    176    
-176   -96    
48     -368   
-208   96     
112    -304   
48     384    
320    -256   
-64    144    
-224   16     
304    128    
192    32     
-192   32     
16     48     
-112   -16    
80     48     
144    -32    
-128   48     
16     -208   
224    32     
-320   -240   
-112   64     
-192   -48    
-832   -288   
1088   -1264  
-160   -448   
-816   -416   
352    64     
-288   -496   
-416   352    
576    224    
-192   208    
48     -208   
192    48     
-320   96     
-304   160    
528    192    
144    16     
-288   -160   
96     96     
64     128    
-272   -48    
-32    112    
128    80     
-400   -448   
1040   384    
-2160  -64    
720    -208   
1248   -48    
-864   -64    
656    32     
32     96     
80     -112   
-32    0      
-512   144    
240    128    
224    176    
-352   16     
-144   48     
128    -32    
-112   80     
-480   -224   
-96    208    
-176   -368   
-224   80     
192    224    
-384   1024   
384    -720   
-432   240    
656    -112   
-144   -976   
-752   176    
608    304    
-96    -96    
-448   160    
96     240    
-288   208    
-240   -208   
-1920  -576   
544    160    
-560   -496   
368    -112   
-112   176    
-768   496    
48     16     
112    16     
112    224    
-544   64     
-208   -448   
-96    -352   
432    -96    
-416   304    
-416   336    
-128   16     
48     -1648  
-2432  -576   
1104   592    
-32    -224   
-96    -720   
-640   640    
-208   1440   
352    656    
208    -400   
-192   608    
-272   48     
32     -288   
-112   48     
304    48     
-352   -208   
-272   -256   
160    112    
-64    336    
128    240    
16     352    
-32    352    
-160   -432   
-64    16     
-48    32     
272    432    
32     880    
-224   -96    
-464   -1312  
272    304    
-128   -272   
-336   -368   
-432   -32    
176    64     
-208   -288   
16     -752   
192    64     
-144   48     
-272   -800   
-192   64     
272    112    
-80    176    
112    -304   
-288   384    
-64    -48    
-32    -368   
112    160    
16     400    
-416   -96    
-112   -384   
496    -192   
-176   -432   
336    48     
-624   -32    
-208   -1184  
-240   -1280  
-80    -512   
32     -496   
-224   -48    
272    592    
-288   192    
0      240    
160    224    
32     -16    
-192   -224   
16     48     
224    32     
-496   528    
32     944    
-288   -384   
352    -352   
32     64     
48     192    
-464   -224   
304    -256   
336    96     
16     176    
0      672    
-320   1184   
16     352    
768    -80    
-688   112    
128    -416   
608    -160   
-208   128    
192    80     
160    368    
-80    352    
-288   768    
160    320    
-32    400    
96     -48    
80     240    
32     512    
192    32     
32     0      
-64    384    
-256   672    
-112   144    
96     -64    
176    64     
304    256    
-1136  768    
560    -176   
192    1072   
-640   -32    
272    -208   
320    64     
-144   -192   
0      240    
112    560    
-176   -320   
-80    96     
240    -96    
-176   32     
80     448    
64     80     
64     416    
0      192    
32     32     
-304   144    
112    352    
368    336    
-256   128    
128    240    
-304   -96    
256    160    
-48    -64    
-128   112    
-96    192    
304    -1056  
-1648  -256   
1696   624    
112    -800   
-1312  -352   
1504   288    
192    272    
-416   128    
384    320    
-192   208    
240    256    
-400   32     
0      128    
112    64     
320    112    
-272   32     
192    -16    
-96    272    
-160   -64    
80     -160   
112    32     
-208   -512   
1168   528    
-1088  48     
544    192    
48     48     
-672   192    
512    96     
128    -64    
240    352    
-176   288    
-192   -320   
160    128    
128    64     
-80    -32    
112    -112   
-640   -960   
656    -176   
-336   -528   
16     -192   
-64    64     
-192   160    
352    352    
-576   464    
224    -256   
-272   240    
144    96     
80     48     
352    176    
464    208    
-720   336    
-288   -608   
608    144    
224    192    
-400   272    
-32    96     
-240   -432   
16     -416   
384    -224   
-400   32     
-432   224    
-272   176    
224    -176   
368    -32    
-304   -288   
-448   32     
624    -224   
368    16     
-128   -176   
-16    192    
-1200  -400   
1392   1312   
1072   144    
-1456  -1104  
336    112    
816    -176   
-208   -336   
-224   -96    
128    512    
96     -80    
-112   448    
-176   -432   
304    352    
224    -1760  
64     16     
208    -336   
-224   224    
144    16     
432    128    
192    0      
-1360  64     
1104   -32    
-224   -96    
128    80     
464    32     
-208   176    
-528   -112   
816    176    
-320   -336   
544    176    
-480   16     
528    272    
-208   48     
208    -48    
0      -32    
96     -16    
240    96     
-176   -144   
112    208    
-64    240    
32     224    
96     -320   
-16    144    
-32    -96    
128    48     
64     -1232  
80     176    
176    32     
-144   -208   
-304   -80    
336    -128   
0      80     
176    -992   
-896   304    
480    -592   
224    128    
528    64     
-80    96     
-176   -176   
-32    192    
208    -720   
-48    80     
-128   -48    
48     240    
208    416    
192    -288   
-304   -2768  
256    -64    
-80    -64    
176    -720   
64     160    
-144   272    
64     16     
-48    -432   
32     64     
112    128    
128    -656   
-64    -48    
48     160    
192    -432   
128    -80    
496    -1392  
-2080  1968   
2048   -816   
-160   752    
400    -1888  
-704   -384   
416    960    
-368   1136   
288    -80    
-48    -224   
-128   -368   
-256   32     
304    -64    
-64    -128   
-736   -640   
208    -304   
128    -64    
144    -176   
176    48     
-144   -160   
-368   -512   
848    -592   
-768   -112   
672    -128   
-320   -464   
-240   -960   
144    336    
16     16     
224    -272   
-96    64     
-224   64     
-288   -16    
704    -416   
-224   -144   
-96    -80    
32     0      
176    -576   
240    -208   
-288   400    
-112   432    
272    112    
112    128    
-208   -144   
-16    144    
16     -80    
48     -128   
64     -96    
-112   -32    
64     16     
432    128    
-1216  -464   
720    64     
-256   496    
-528   -416   
1504   304    
-384   112    
-272   16     
-80    432    
144    112    
-128   320    
-192   80     
-96    96     
224    176    
-272   560    
448    64     
96     80     
-208   -992   
352    -400   
32     -1296  
32     -176   
-176   -352   
880    944    
1248   -144   
-1584  1040   
1200   240    
176    -592   
-400   -272   
-400   -144   
-432   -768   
-320   -752   
-224   -80    
320    -144   
112    144    
112    -960   
-96    -368   
128    -208   
64     -80    
304    416    
544    368    
-432   -192   
320    -288   
-48    -368   
384    -208   
-480   496    
688    224    
-320   -896   
-576   -880   
272    -240   
96     -128   
48     400    
192    352    
-176   -48    
320    -32    
-400   -688   
-672   80     
368    320    
-32    -560   
352    -144   
320    -48    
-624   -320   
144    400    
32     -208   
-96    -16    
256    -416   
208    -80    
-384   352    
-384   256    
-112   -128   
-16    -96    
160    0      
1104   1600   
-2352  -240   
928    32     
1104   32     
-896   -512   
-416   -624   
-128   -1136  
608    752    
-96    -288   
-1104  96     
0      -544   
-480   656    
80     -304   
-96    48     
-192   -32    
-128   288    
192    448    
-192   160    
48     -16    
-976   -448   
-320   -304   
-432   -224   
384    160    
48     -208   
-832   -400   
-192   -368   
-272   -496   
48     -64    
192    16     
-368   192    
32     -208   
48     176    
-512   -208   
-80    -96    
32     336    
-144   224    
-320   -496   
176    -112   
-448   -512   
-96    -1040  
304    -144   
-272   64     
-144   -592   
-112   -304   
304    -192   
-1488  80     
-192   80     
128    -1424  
240    224    
-288   208    
-272   0      
336    448    
896    560    
-848   768    
0      1360   
464    592    
-80    448    
48     592    
16     -16    
-192   -224   
-752   1104   
176    800    
128    -208   
-64    80     
32     32     
144    -144   
-368   -704   
-48    -704   
320    -496   
-160   640    
-96    320    
32     -256   
-48    -160   
32     -64    
-80    320    
48     480    
80     176    
-928   80     
432    -176   
-160   -112   
784    1328   
-1984  1216   
896    -768   
720    528    
-240   848    
-288   1264   
80     512    
192    -304   
-224   384    
240    -224   
-192   -464   
-128   -112   
-128   176    
-16    112    
-224   -96    
48     224    
448    64     
32     160    
-48    256    
-48    144    
-208   -464   
864    -720   
-608   880    
-16    64     
32     112    
32     816    
192    48     
-384   576    
272    208    
0      -16    
-16    96     
-160   -64    
-176   256    
160    -32    
-224   144    
48     112    
272    -64    
144    0      
-288   -48    
0      48     
112    64     
-112   48     
160    64     
-272   -160   
-688   -48    
352    -80    
-144   160    
16     16     
-192   -192   
-416   -1120  
2048   64     
-688   -224   
-960   -112   
640    -160   
768    544    
-560   -16    
64     304    
448    -208   
-304   32     
-224   48     
480    128    
-144   48     
176    64     
-576   -96    
368    112    
-64    32     
-208   -96    
304    144    
-128   -32    
-192   64     
192    -416   
1072   528    
-1440  -128   
480    -16    
160    96     
-560   -272   
320    -112   
48     112    
32     -80    
16     -32    
-272   128    
96     80     
112    176    
64     64     
0      80     
-192   0      
80     -96    
-224   -272   
320    256    
432    160    
-192   32     
-64    192    
384    -64    
-720   -336   
-640   -112   
944    176    
-160   288    
-208   160    
96     -176   
96     -128   
336    -96    
-560   48     
-320   304    
-16    208    
-128   -32    
-32    48     
320    48     
-144   128    
-432   64     
16     -16    
128    80     
-352   -160   
-64    -80    
96     0      
400    160    
-720   224    
-48    -80    
-224   192    
-80    -384   
2464   3920   
-2224  1664   
240    176    
416    32     
-256   16     
416    80     
-704   -320   
112    80     
16     288    
-400   0      
528    256    
32     32     
-496   16     
96     192    
464    -32    
-48    144    
-48    32     
48     176    
-48    -128   
384    1168   
208    -80    
-400   96     
224    16     
-336   160    
-32    176    
128    128    
-240   96     
-64    -1264  
512    288    
-160   320    
-48    -48    
32     304    
160    16     
96     320    
-144   96     
64     320    
144    128    
272    -48    
-128   -256   
16     -80    
288    160    
48     96     
-192   -176   
128    48     
-240   80     
320    -32    
16     32     
192    240    
-512   80     
416    -144   
288    -128   
-64    128    
-1136  384    
784    -48    
-480   48     
240    96     
32     -64    
-304   -960   
-32    -304   
144    -832   
-16    48     
-112   32     
80     16     
240    -32    
-128   -224   
-112   16     
0      448    
304    208    
128    752    
80     784    
176    928    
64     368    
16     128    
160    160    
-64    -320   
112    96     
-608   -368   
320    48     
272    368    
-112   192    
-528   -1088  
1248   -464   
-480   656    
304    64     
-192   272    
96     -320   
-80    -32    
-16    -208   
288    400    
-144   -896   
-80    48     
288    -2064  
-144   64     
-80    208    
192    288    
208    -208   
-192   176    
272    48     
112    0      
32     -416   
-336   144    
704    448    
-336   -32    
-144   -544   
-32    -736   
0      944    
144    -96    
-16    -304   
-80    16     
-48    -208   
160    128    
336    320    
-112   320    
-272   -416   
208    240    
48     32     
-192   400    
352    80     
-32    -544   
-224   -272   
128    304    
368    -416   
32     224    
-64    48     
32     -112   
80     240    
336    224    
-288   -32    
-368   -240   
672    -480   
1216   -320   
-3168  160    
416    -80    
1056   -816   
-1088  -864   
224    -192   
-176   -496   
32     1168   
96     -432   
336    592    
-80    -112   
-272   256    
192    96     
112    176    
64     48     
-80    -288   
-48    -48    
208    -480   
-224   224    
16     -128   
-176   -240   
1040   624    
320    -400   
-1056  -768   
272    528    
112    544    
224    -32    
320    -96    
304    -848   
-704   -2528  
176    80     
304    720    
-64    208    
-32    -256   
-112   -160   
-192   -96    
208    -336   
96     -2736  
-352   144    
144    -64    
-176   -48    
272    -224   
240    48     
-64    -224   
-144   384    
816    -192   
80     -560   
-656   800    
272    464    
-224   -128   
496    64     
-208   272    
288    -272   
480    -16    
16     -528   
336    32     
-272   -320   
864    -1024  
-32    -752   
0      -144   
16     416    
128    -784   
432    800    
-96    416    
96     928    
-160   624    
-160   -224   
32     -288   
208    -96    
272    16     
800    2224   
-464   368    
-624   -1184  
928    -960   
160    1136   
-208   1872   
-16    528    
240    -752   
496    -848   
-160   -192   
-112   -592   
-48    352    
336    -144   
-176   -624   
-224   368    
176    192    
64     128    
96     -256   
-80    -256   
-272   -448   
-512   -288   
64     -240   
32     288    
864    -208   
-672   1248   
592    -336   
-240   272    
48     -192   
192    -368   
-32    -1264  
-576   -960   
224    80     
384    672    
-448   192    
-112   64     
96     32     
-208   -96    
32     -32    
64     -352   
-240   -240   
-80    -640   
240    256    
-336   -448   
176    560    
0      1024   
192    384    
-272   32     
-96    224    
400    416    
80     128    
-176   64     
-448   16     
144    -528   
224    -1088  
-96    224    
-560   -208   
320    704    
32     -720   
-16    256    
-64    -1072  
-704   -896   
224    -240   
160    -224   
-112   -192   
128    112    
-400   384    
128    -576   
-528   -528   
48     -1040  
-416   -592   
128    -304   
96     224    
112    -112   
-64    -144   
304    496    
416    768    
-560   1104   
544    1248   
-304   976    
-208   144    
656    2016   
-736   -688   
-144   112    
1248   128    
-288   -192   
-288   128    
-224   -144   
432    32     
-144   -176   
-320   32     
176    48     
-256   352    
176    32     
-32    -192   
-480   368    
240    16     
-64    432    
-176   0      
-32    -352   
208    0      
-800   -96    
-704   -624   
880    -144   
224    -32    
-1408  96     
1216   64     
-96    48     
-64    16     
-416   352    
464    -96    
-16    -128   
16     -48    
112    -64    
-368   -112   
-80    144    
112    -96    
208    256    
-48    -32    
-208   48     
80     0      
-368   0      
-240   64     
160    128    
64     176    
-80    0      
-224   208    
96     -112   
416    48     
-304   -112   
0      288    
-480   2032   
1120   992    
-736   48     
-48    -432   
-16    -224   
-432   288    
784    -256   
-624   -176   
-80    -16    
-688   -32    
224    48     
96     -160   
-64    128    
-112   -384   
-608   0      
704    -352   
-432   0      
112    -32    
-48    48     
144    16     
32     208    
-512   -720   
-592   352    
1728   -288   
-2208  -224   
848    224    
384    -80    
-704   272    
288    144    
-112   96     
192    32     
96     64     
-112   96     
-80    96     
80     16     
32     -32    
-96    48     
-48    -144   
-320   128    
560    0      
-368   48     
-288   432    
-144   80     
16     -32    
448    -64    
-128   304    
-272   368    
-128   -160   
832    -80    
-384   16     
-480   -80    
400    160    
112    272    
-96    -48    
-16    224    
144    -32    
-1056  208    
176    288    
-784   272    
272    -224   
-144   64     
320    -32    
64     112    
-64    -32    
-304   48     
448    -240   
128    80     
-16    128    
-176   0      
688    1600   
-2000  1056   
224    1376   
592    48     
-1008  -432   
816    160    
544    -48    
-816   368    
0      -64    
320    448    
688    -80    
-656   96     
160    16     
-96    112    
-64    -80    
-16    160    
128    112    
-528   48     
480    80     
432    416    
-784   912    
320    480    
208    -48    
-144   -160   
208    192    
32     -48    
-496   0      
736    256    
-752   128    
-48    272    
240    176    
-240   112    
96     -32    
64     -80    
112    -144   
-368   64     
384    96     
0      32     
128    144    
32     -80    
-384   0      
288    32     
-176   -256   
64     -416   
-80    -320   
-288   352    
80     1216   
368    -80    
-352   -656   
-128   -208   
144    -336   
-16    96     
-48    -368   
176    -160   
-160   0      
-48    416    
160    -32    
96     -384   
176    -576   
-672   -176   
-176   -208   
400    -96    
-192   -160   
16     -128   
32     -16    
-672   -336   
272    -496   
336    -224   
-208   -640   
-304   -64    
144    624    
192    -112   
16     -192   
-48    -224   
0      64     
-160   -64    
16     -96    
-32    336    
0      -336   
-160   608    
288    -336   
-432   -224   
688    -944   
416    368    
-592   -176   
192    -416   
-112   224    
352    -304   
-832   -864   
368    192    
-208   352    
64     -32    
320    416    
-80    -80    
-288   400    
128    -144   
208    80     
112    -64    
-256   128    
-16    -224   
-16    -32    
-112   -480   
960    -496   
-496   720    
240    -320   
-224   -512   
-96    -208   
240    256    
128    208    
-96    128    
48     -208   
0      0      
256    160    
-80    48     
-48    112    
144    -176   
-32    32     
-80    256    
176    -304   
304    112    
-304   -176   
-384   80     
400    48     
224    288    
0      -16    
-112   0      
144    0      
112    192    
320    208    
-208   128    
-144   160    
-160   -1232  
-752   -272   
16     -400   
-576   112    
464    -144   
400    -480   
208    -64    
-736   -272   
-208   -208   
304    224    
352    512    
-384   96     
-48    -64    
208    -96    
32     -320   
-128   720    
32     -192   
144    -448   
-400   -672   
224    1120   
-272   -1040  
1504   944    
-880   -3184  
-144   544    
416    624    
-640   448    
272    -544   
752    -1760  
-272   -1856  
-544   -64    
272    1120   
96     976    
-48    688    
512    336    
-32    160    
-128   -256   
-96    -400   
592    -1632  
-144   -144   
-176   176    
32     240    
16     -32    
80     -96    
112    -192   
-384   288    
-288   592    
-352   480    
544    1456   
-336   1584   
-400   544    
256    -16    
-112   96     
-192   -400   
656    80     
-80    -224   
-96    256    
128    -1072  
1024   -1264  
224    48     
32     400    
-48    368    
-256   80     
464    576    
-496   592    
208    496    
-368   496    
368    -96    
208    192    
-384   752    
-160   -1888  
-432   -1904  
-544   -688   
32     -144   
160    -432   
640    -592   
-608   560    
0      1424   
-112   768    
768    464    
208    -176   
-544   -160   
-144   16     
608    48     
288    -32    
-528   -288   
-80    208    
272    144    
384    -176   
288    -1040  
-752   -752   
144    64     
96     -144   
208    448    
592    -112   
-880   -128   
432    80     
-48    48     
0      96     
224    112    
-240   288    
64     704    
16     144    
48     -208   
432    -16    
0      80     
-192   96     
208    -176   
48     352    
-208   -336   
192    128    
80     -240   
-144   -16    
-64    -192   
112    112    
16     -96    
32     608    
-336   176    
176    -928   
-256   -448   
80     -736   
-16    -112   
256    336    
864    240    
-464   -48    
80     -736   
-32    -224   
-32    -32    
528    -208   
-256   176    
-96    -96    
160    -336   
64     -112   
-336   -880   
-32    -48    
320    -320   
32     -240   
-304   -96    
144    -736   
-80    -96    
400    -368   
-384   272    
112    -672   
-48    -48    
224    112    
80     432    
-96    -480   
-208   208    
448    192    
48     -320   
-544   -32    
-640   -2336  
-528   -16    
1584   -112   
-1264  -16    
528    0      
512    96     
-672   -560   
-208   -368   
112    -432   
352    0      
-128   -16    
-128   -240   
-16    16     
176    368    
-176   -16    
-48    -112   
384    -144   
-304   112    
208    0      
80     -16    
800    912    
-1664  -16    
128    -160   
1056   -272   
112    -240   
-368   -224   
-144   16     
448    -336   
192    144    
80     -144   
-192   80     
-64    64     
176    -80    
-64    -160   
304    -224   
-32    96     
176    48     
-16    80     
192    -736   
80     32     
-112   -368   
32     32     
-32    0      
384    96     
-576   -224   
272    -32    
-48    -272   
-320   -96    
112    -48    
368    80     
-704   -48    
608    -176   
-64    -320   
208    -512   
-448   -80    
64     -352   
-80    304    
224    -240   
256    32     
-32    -48    
-176   96     
-112   48     
320    192    
-160   48     
-160   160    
-624   -64    
-288   -432   
16     176    
48     -288   
-112   128    
672    480    
-512   -496   
-1536  112    
1776   208    
-1264  -112   
-528   208    
704    256    
-144   -80    
-624   32     
400    -96    
336    -80    
-304   -48    
-80    160    
432    -208   
-256   96     
224    -368   
-160   -112   
-352   -80    
32     -192   
-32    16     
48     144    
-464   176    
1136   -160   
-272   48     
-512   -80    
64     64     
160    -624   
576    512    
-272   -208   
-272   -240   
208    -608   
-112   32     
80     16     
-160   -48    
32     -336   
-224   208    
160    192    
-352   224    
-48    -80    
-80    96     
288    32     
-384   -112   
-128   160    
-416   -80    
160    -80    
-480   224    
-16    64     
-80    64     
272    864    
-208   352    
-2480  -848   
1504   -272   
784    32     
-96    256    
-448   -16    
-512   256    
704    0      
-496   128    
96     16     
320    48     
-320   128    
-80    0      
80     0      
-288   -48    
16     240    
-96    -112   
-336   192    
256    -400   
-160   -496   
-208   -320   
32     144    
96     32     
304    96     
-432   144    
608    512    
-576   176    
80     -80    
304    368    
0      816    
-96    752    
-48    240    
512    64     
-304   176    
-688   608    
-128   208    
768    144    
0      48     
-144   560    
32     432    
112    544    
-64    448    
48     192    
96     80     
-288   272    
-48    384    
-128   544    
336    -496   
-1104  48     
176    640    
-128   256    
-64    -960   
48     -448   
16     -1120  
-176   -576   
176    -368   
-480   -1104  
-656   -1696  
368    -32    
-176   704    
224    32     
-224   -128   
16     32     
-320   16     
320    -576   
-240   224    
-208   688    
-368   64     
0      -64    
-80    368    
160    -32    
-112   64     
-48    128    
32     -16    
144    -16    
32     16     
-48    208    
192    208    
-224   256    
0      0      
256    -80    
32     -448   
-640   -96    
-16    128    
208    -48    
-80    32     
208    -320   
-208   64     
-208   240    
96     -64    
288    128    
-112   80     
-16    48     
-240   -128   
112    176    
16     -16    
-64    144    
176    80     
0      0      
64     0      
-384   -176   
896    -592   
-208   576    
448    0      
-512   128    
-144   176    
96     -240   
80     352    
32     -384   
-16    48     
-112   0      
256    368    
-80    48     
-96    -32    
96     288    
192    80     
-416   144    
192    368    
48     880    
-160   144    
-32    -160   
128    -176   
-32    128    
64     80     
128    128    
16     128    
-32    128    
336    -16    
144    -304   
-448   16     
512    -624   
-3072  -992   
1088   256    
432    -448   
-224   -400   
32     -160   
128    -816   
240    992    
-352   576    
176    -496   
-192   160    
-160   -224   
256    96     
-192   -624   
-160   432    
192    64     
0      0      
-32    -496   
-400   320    
80     640    
-48    -256   
1216   -80    
-1808  -16    
448    16     
640    208    
-560   656    
368    304    
752    1472   
608    1328   
-432   1152   
48     416    
-224   -96    
128    -288   
480    -336   
16     192    
-96    240    
-48    -48    
320    896    
464    304    
128    672    
-560   832    
32     240    
576    352    
-192   -304   
-304   240    
224    -208   
832    -432   
-208   -96    
224    -16    
-352   320    
128    176    
352    208    
-144   208    
-464   -64    
336    -352   
-592   272    
288    -112   
-384   -16    
-96    144    
480    -16    
-448   80     
304    64     
80     -80    
48     672    
224    -96    
-16    -16    
544    48     
-96    112    
-208   112    
32     -864   
224    -2448  
-1648  -1200  
992    176    
656    128    
496    208    
-720   96     
0      320    
48     448    
336    320    
-288   96     
-160   96     
176    -80    
-112   -48    
528    320    
-208   -304   
-144   208    
160    32     
-272   160    
976    832    
-608   880    
-48    -208   
384    -288   
-368   -160   
128    384    
48     16     
-320   272    
272    -128   
-336   176    
176    80     
-64    -48    
-128   -80    
80     128    
176    -224   
-80    -448   
336    96     
-176   -64    
224    48     
-96    -128   
256    80     
128    -112   
-224   80     
-112   -96    
304    -48    
-48    256    
432    112    
-480   96     
336    -528   
144    176    
48     160    
-352   32     
320    144    
384    1072   
-464   -16    
-176   112    
160    64     
288    96     
-272   96     
160    -16    
160    160    
144    -64    
-16    80     
16     -64    
-192   256    
240    -720   
-48    144    
-16    64     
176    -48    
-320   -208   
-64    -64    
288    -304   
-112   160    
288    96     
48     -160   
-192   144    
176    -288   
-32    256    
-32    -608   
64     160    
0      48     
48     -80    
-576   -1840  
2336   928    
-560   336    
-832   96     
576    416    
-464   192    
-128   48     
1008   -112   
-112   -96    
-608   -32    
256    -256   
320    -272   
288    224    
-320   -48    
64     384    
464    -80    
-368   -96    
256    368    
-160   -16    
-144   -272   
208    -48    
-288   656    
1424   -608   
-784   16     
-416   -144   
1104   416    
-128   -304   
-464   -160   
64     -64    
176    -256   
-64    64     
224    80     
-64    48     
160    240    
192    208    
-32    -192   
-464   224    
656    -192   
-272   192    
368    -288   
-160   176    
0      -336   
96     192    
304    -80    
-272   128    
288    0      
48     80     
112    -32    
-112   -928   
80     -512   
-400   -1664  
-560   -1344  
880    -832   
-752   -640   
240    -272   
-176   80     
800    -32    
-400   32     
-48    -512   
256    -1264  
48     96     
80     -1344  
-208   112    
48     -96    
640    -176   
-560   -112   
224    -416   
-64    -144   
-384   -576   
288    48     
-32    336    
544    896    
-912   -784   
-944   -48    
1456   -320   
-608   64     
-160   80     
240    128    
16     208    
-464   -240   
16     -192   
160    -128   
-160   -64    
32     80     
240    144    
-304   -1216  
16     -112   
144    -544   
-112   -144   
192    -128   
32     128    
-16    -48    
-320   -496   
304    496    
192    -272   
-1296  208    
960    112    
160    64     
-592   16     
208    -256   
-128   -288   
224    -160   
64     -464   
-176   224    
-224   -64    
352    16     
32     -16    
-112   -304   
-432   144    
320    48     
64     176    
128    -320   
400    160    
-64    -80    
16     -16    
176    -688   
-160   -208   
-224   -16    
288    64     
-464   -704   
448    -288   
-128   -1104  
-192   912    
848    -432   
-1232  -64    
192    48     
-16    -544   
320    -1344  
0      -368   
-336   -272   
-80    -160   
80     144    
112    -768   
176    -64    
-96    80     
-48    240    
0      -16    
272    -48    
-192   160    
160    688    
64     640    
-144   96     
144    -400   
-304   640    
-912   656    
128    32     
544    768    
176    496    
-256   1168   
-48    -1296  
288    128    
144    128    
-208   -16    
0      -384   
-192   -400   
144    -80    
224    -32    
-448   -112   
0      640    
-112   112    
-320   -720   
384    80     
192    -352   
-48    -16    
160    800    
-112   608    
240    -128   
16     -288   
-496   -592   
112    80     
64     -48    
464    336    
-320   -608   
-944   -480   
752    -832   
-672   -352   
144    80     
-160   -1200  
288    656    
400    -96    
-400   -192   
-96    80     
208    16     
-144   272    
224    288    
256    -48    
-112   112    
16     -288   
-336   -128   
-256   192    
160    -80    
-48    80     
-1552  -192   
-176   96     
-32    112    
-880   -80    
-128   -32    
96     -80    
-96    160    
0      64     
96     -32    
384    -576   
-1248  112    
112    224    
240    32     
-48    -272   
-192   0      
-112   -272   
80     784    
-32    -160   
-96    -112   
16     192    
-320   160    
-16    176    
-1072  64     
32     -144   
-48    -32    
-112   112    
192    224    
48     80     
-80    -368   
-512   -176   
288    -16    
-368   32     
80     64     
176    240    
32     0      
-544   352    
192    -32    
96     -144   
-160   -176   
-320   192    
-112   400    
-64    240    
-112   32     
-48    -16    
80     544    
-80    80     
-416   624    
480    368    
-320   -16    
-160   16     
96     272    
192    112    
-464   288    
-272   -80    
-320   -160   
224    96     
-448   -336   
608    -144   
-304   -1232  
2208   -832   
-1504  656    
576    224    
384    864    
-912   1104   
128    -112   
608    576    
-96    -32    
-624   -880   
80     -1120  
256    -560   
96     -128   
-560   -32    
176    144    
64     -48    
-96    112    
-48    -160   
336    -208   
-272   -288   
32     128    
-64    -752   
-720   528    
1840   -144   
-1760  384    
2672   576    
-848   832    
272    672    
592    -624   
-480   -160   
48     -112   
192    208    
-112   -128   
0      -112   
-416   128    
256    160    
96     -128   
-320   -64    
-128   144    
32     -208   
384    16     
128    160    
-352   -592   
-32    160    
480    -16    
-272   -160   
560    752    
-400   224    
-752   -16    
-208   96     
448    256    
-16    -144   
-304   32     
112    0      
-448   96     
48     -176   
672    -160   
96     -208   
288    -688   
-432   -64    
0      96     
176    32     
64     80     
-112   32     
144    64     
80     112    
-128   0      
0      96     
-16    112    
496    1232   
976    5120   
-1824  2544   
512    112    
1152   -560   
-384   0      
-48    16     
-352   208    
416    -16    
64     -16    
128    -64    
384    240    
-144   176    
144    64     
-144   -48    
-80    16     
160    240    
-464   16     
48     160    
96     -336   
928    -640   
-800   96     
512    128    
-128   240    
-560   32     
-112   0      
864    208    
-560   -144   
-256   320    
176    -16    
160    64     
160    -32    
-352   16     
96     208    
288    -144   
-464   192    
368    64     
-288   128    
832    112    
-512   32     
-64    208    
176    16     
-96    80     
480    16     
-304   112    
96     384    
-96    32     
16     16     
128    16     
-432   80     
320    96     
304    80     
16     368    
32     -48    
-560   368    
1168   -192   
-704   -32    
-352   -144   
240    -16    
304    160    
0      -48    
48     192    
-32    48     
0      208    
80     112    
48     -64    
-80    112    
32     768    
224    544    
-368   -400   
288    -176   
-128   128    
-288   64     
448    192    
144    48     
-288   -48    
-224   -32    
336    -400   
80     -800   
-512   496    
192    176    
-544   -1280  
2288   944    
-608   656    
-576   160    
368    320    
-576   0      
224    960    
928    -48    
-608   -912   
-112   240    
304    320    
160    -112   
224    -1008  
-240   0      
-80    -272   
288    320    
240    208    
-16    -80    
-336   -16    
64     144    
192    160    
368    1552   
800    -272   
-944   -48    
32     -16    
240    64     
32     96     
368    -304   
-112   272    
-208   -240   
160    176    
272    80     
-272   112    
352    -80    
-176   32     
32     -96    
192    -32    
-432   -32    
528    -64    
-48    -16    
176    128    
-96    272    
32     -448   
-128   160    
256    -1088  
-48    144    
128    -32    
-176   256    
176    96     
208    208    
-192   -1472  
-2976  1280   
1392   336    
784    -528   
-2032  -1376  
-16    -352   
1392   208    
-1040  -752   
-272   272    
96     -688   
336    400    
48     32     
-272   192    
304    304    
-496   160    
32     320    
400    -32    
-192   112    
-112   16     
-288   320    
288    64     
-608   -288   
880    -320   
336    -208   
-1856  -960   
256    304    
592    -928   
-224   0      
-272   -336   
128    144    
320    -48    
336    608    
-544   -128   
-208   160    
64     -256   
176    -96    
288    112    
-544   -496   
352    -112   
48     -240   
16     224    
64     -80    
192    368    
352    -368   
480    208    
-480   272    
-512   -880   
-240   368    
416    -64    
-368   240    
752    -144   
-112   -48    
160    160    
-32    176    
32     160    
560    400    
288    -512   
-496   -432   
-128   400    
624    512    
-432   128    
-192   144    
336    16     
-112   -1056  
-16    208    
-224   -464   
0      -112   
-16    -96    
16     -192   
128    -96    
1008   1904   
-464   352    
0      -592   
816    -464   
-688   432    
-176   800    
496    224    
464    -512   
-208   1248   
208    528    
128    -192   
224    240    
0      64     
32     112    
-16    -640   
-192   -560   
400    288    
112    32     
-176   -48    
192    -2400  
-144   -48    
144    -2256  
-160   -96    
720    -256   
-400   -336   
144    480    
-320   160    
336    -208   
-144   -464   
-32    -32    
-208   -240   
240    320    
192    32     
192    720    
-432   -16    
-176   -656   
-16    -320   
96     -256   
432    688    
-304   272    
0      -480   
192    -64    
96     128    
-16    240    
240    -256   
-16    -144   
16     128    
432    -160   
-528   240    
192    -224   
112    64     
-432   1280   
1424   -592   
-1728  -336   
160    -112   
-272   64     
736    960    
-144   -224   
176    -1344  
304    -416   
16     176    
-176   128    
64     336    
144    240    
-256   368    
32     -304   
-128   -160   
208    -288   
304    -160   
80     -96    
96     64     
-48    -288   
304    -128   
-144   -400   
-112   -16    
144    -1984  
-432   0      
256    -256   
128    48     
0      -16    
-32    -96    
-240   -656   
192    -368   
-592   192    
352    -288   
352    16     
256    -544   
-160   -336   
272    -752   
304    -336   
112    -96    
48     432    
-80    64     
-80    -16    
112    -208   
48     -144   
-128   224    
32     304    
32     224    
-176   192    
-832   -112   
1040   -832   
-1040  656    
464    -288   
-336   -368   
-176   -352   
96     -112   
384    -1792  
176    80     
0      32     
-496   -320   
288    48     
368    272    
-112   -368   
48     208    
-544   -64    
288    -48    
160    160    
80     -192   
-320   160    
16     -576   
176    64     
64     -336   
352    -128   
-304   -400   
-208   -80    
48     -160   
192    32     
-352   -320   
480    -144   
-560   -1376  
-1168  -112   
880    -384   
-928   -336   
720    400    
-416   -144   
112    -48    
128    16     
-272   48     
64     -112   
112    64     
-64    -96    
-112   16     
-32    144    
432    176    
-144   112    
-192   -128   
-480   240    
144    -80    
-176   -32    
64     -48    
128    -304   
-1504  1440   
1056   -176   
-32    256    
16     -368   
-288   -208   
464    112    
-1088  304    
544    -240   
64     -48    
-336   -48    
256    80     
-16    -128   
64     176    
144    -176   
-336   80     
-48    80     
-832   -224   
464    16     
-80    80     
-112   592    
-224   -192   
-352   240    
160    -128   
-16    -256   
128    48     
304    -224   
-224   -576   
-240   480    
-368   -304   
-192   96     
336    16     
304    16     
-208   -896   
-160   -416   
544    160    
96     48     
256    576    
192    304    
-560   48     
464    16     
560    368    
-672   -64    
-128   112    
272    144    
784    -176   
-400   160    
-224   64     
400    -656   
-1728  -3152  
-1312  -1104  
832    -16    
-64    -224   
-304   240    
-112   16     
-352   -256   
208    320    
272    128    
-576   -48    
224    -96    
352    176    
-464   32     
-272   144    
144    -96    
160    48     
-160   80     
-368   -32    
512    496    
-608   -32    
32     544    
704    -224   
-704   160    
-560   -304   
-288   -80    
400    240    
-112   288    
32     0      
-144   128    
112    0      
240    128    
16     240    
-112   0      
-192   192    
-448   -368   
208    384    
-304   80     
-464   144    
848    -224   
-304   -16    
128    144    
-272   48     
0      160    
384    48     
-96    112    
-96    -224   
-432   -416   
240    -144   
-32    0      
64     192    
-208   144    
112    928    
-768   512    
208    -272   
-48    -240   
-368   -96    
224    560    
528    144    
-16    48     
-320   128    
80     -16    
112    -48    
-208   -16    
48     112    
-112   16     
0      160    
-176   16     
112    -96    
-48    -256   
-336   160    
512    496    
336    96     
-400   -256   
-48    -32    
16     32     
64     -176   
144    80     
-160   -272   
-80    -32    
-96    32     
-624   -1088  
2144   624    
-928   112    
-992   208    
992    176    
-432   -64    
-128   -144   
224    336    
592    1200   
-112   272    
-288   -528   
448    192    
-48    32     
-192   112    
-32    208    
240    -272   
-64    64     
384    48     
-144   0      
-16    -336   
0      176    
0      1040   
1104   -352   
-880   -16    
-112   464    
240    80     
112    -32    
-368   -784   
-16    -96    
32     64     
48     -32    
32     80     
-176   16     
144    -80    
-32    176    
224    -16    
-224   112    
32     -112   
32     -16    
256    -208   
-48    96     
96     272    
-16    80     
48     112    
48     -16    
-336   32     
400    64     
-112   192    
80     -96    
-128   80     
1472   1312   
-1424  -448   
-1792  -144   
2368   96     
-480   -128   
-800   304    
112    -48    
-16    -208   
448    -16    
-144   32     
32     80     
-208   80     
48     192    
208    -80    
240    -64    
-256   -272   
-144   48     
176    64     
160    176    
-192   -48    
-32    176    
-336   -624   
1184   -544   
-400   112    
-48    128    
512    752    
384    592    
-192   544    
-400   176    
16     -144   
384    464    
416    160    
-304   96     
-240   64     
496    0      
176    -32    
-400   144    
-112   -528   
-240   80     
256    304    
48     -880   
48     64     
-160   -96    
-256   -80    
32     -48    
-176   -544   
96     -240   
1136   1296   
608    1296   
-208   496    
304    16     
-176   112    
64     -608   
336    816    
-400   352    
-464   -1648  
832    -576   
-80    400    
560    -208   
-80    240    
-80    592    
32     -32    
240    0      
144    -224   
-144   112    
144    -176   
-720   528    
-176   -128   
208    -96    
208    -144   
96     -720   
-1168  1200   
864    -688   
-560   320    
-544   384    
1408   1216   
-560   -544   
-176   512    
-16    368    
368    -704   
80     720    
-32    -16    
-304   -192   
-96    240    
336    368    
-96    -112   
192    -144   
32     -400   
240    352    
288    496    
-144   1088   
-32    -512   
160    -48    
-208   128    
304    288    
-64    416    
256    1072   
576    -272   
-288   656    
-208   272    
256    -224   
160    480    
64     -1392  
-208   128    
-64    -80    
-272   336    
352    336    
384    160    
-624   -752   
-32    304    
416    -32    
64     -48    
192    -208   
-112   272    
-48    -608   
48     -448   
160    688    
-592   -1824  
-48    112    
400    -1008  
272    288    
320    1152   
-656   528    
-192   896    
592    336    
-96    256    
-32    96     
-160   368    
336    256    
192    432    
144    -96    
-144   112    
-224   96     
224    64     
352    -160   
-160   -192   
-64    -1136  
288    64     
128    -384   
608    368    
80     368    
96     -192   
-80    304    
240    -336   
-208   448    
192    -32    
48     208    
-48    528    
208    240    
32     -224   
-144   384    
336    -1168  
-1248  320    
288    432    
112    112    
-96    128    
-80    -736   
-160   832    
224    336    
-160   784    
288    -448   
112    -368   
-192   -304   
-112   -112   
240    -416   
80     128    
48     240    
128    -80    
-144   -192   
176    -2048  
224    -576   
-128   -784   
-384   112    
288    -128   
176    -736   
-32    -432   
-208   752    
-128   -96    
80     160    
128    -496   
32     -1648  
-256   352    
-16    -464   
288    -336   
64     -192   
-128   -656   
112    64     
272    160    
144    -112   
-128   -1200  
96     -208   
16     80     
-64    -176   
176    160    
-112   144    
272    -288   
320    160    
-224   -448   
-32    32     
0      -16    
-608   592    
1696   -640   
-2368  32     
992    -96    
672    224    
-976   -64    
160    -544   
560    -240   
-208   -576   
-80    16     
80     -240   
-16    160    
32     -160   
288    128    
-672   -48    
368    80     
-800   -128   
-80    -560   
48     -128   
224    -176   
-16    96     
-32    -448   
864    1040   
992    -1712  
-1760  464    
1168   -112   
-496   208    
32     16     
416    -368   
-816   -16    
656    -16    
-608   -112   
80     -64    
320    48     
320    160    
-272   -176   
-256   -1152  
224    -64    
32     -1248  
96     -240   
480    64     
16     64     
176    528    
416    -368   
-416   96     
400    144    
-352   -448   
-336   240    
-1648  0      
448    -64    
-400   -256   
-240   -48    
368    144    
-144   -16    
96     48     
208    -240   
-192   -64    
-32    64     
-288   -208   
-16    48     
672    -272   
352    144    
-208   -48    
-416   -16    
192    -224   
432    -480   
-336   64     
48     -48    
128    -192   
-512   -512   
992    -3168  
816    -848   
240    1456   
160    208    
-576   64     
144    32     
160    -240   
208    -208   
-448   112    
-832   96     
464    -32    
128    -160   
-64    128    
-160   -432   
272    16     
96     -1904  
144    32     
-304   112    
240    48     
-656   -272   
768    352    
-656   256    
288    64     
-352   -112   
-32    128    
336    -32    
-576   -48    
528    416    
-128   0      
-208   -80    
32     160    
240    -80    
-208   96     
400    16     
-592   -48    
288    240    
16     -144   
-272   0      
192    -112   
-16    -112   
-16    -32    
-560   -416   
352    16     
-48    80     
-432   -272   
448    -240   
-1264  -128   
-256   -16    
128    48     
-16    256    
176    240    
-176   32     
320    -528   
-464   416    
448    352    
96     240    
-624   16     
80     128    
224    -48    
288    0      
-80    112    
-320   192    
192    16     
0      224    
-64    160    
-336   240    
32     48     
240    -48    
-368   -656   
32     -800   
-16    -304   
-208   -32    
160    480    
416    -160   
-448   80     
-320   224    
-80    -192   
32     -960   
-48    -528   
-80    -176   
-192   -16    
1456   2256   
2080   -224   
-2336  352    
720    -1200  
0      176    
16     -256   
-32    -288   
-32    -16    
-448   -176   
256    -48    
272    -336   
-240   -128   
-368   288    
144    16     
272    0      
32     592    
-272   592    
16     160    
-96    -288   
128    0      
-224   400    
0      -80    
-32    -304   
144    -480   
208    -640   
-80    224    
-240   592    
144    -64    
16     0      
80     -80    
32     304    
-192   144    
-48    144    
272    -448   
0      416    
-32    -64    
48     -256   
160    32     
-208   -304   
-48    336    
272    -144   
16     112    
-80    240    
-80    -64    
80     128    
128    224    
-368   -416   
16     208    
496    144    
1488   1040   
-2144  -320   
-1104  -320   
2400   0      
-1024  -352   
-656   -48    
336    -752   
-80    368    
-80    1072   
80     432    
368    -32    
-368   -64    
-32    96     
192    -272   
-1024  -448   
368    0      
272    176    
-432   16     
288    864    
176    736    
-240   -32    
160    592    
1920   16     
-960   368    
-848   816    
672    -256   
-112   384    
32     1200   
272    1184   
-160   1008   
-192   560    
336    80     
80     32     
0      -16    
-96    272    
288    352    
-32    32     
144    848    
-160   928    
-96    272    
208    -496   
128    -288   
-208   -80    
-336   -896   
-1072  -1280  
192    -1808  
-64    -464   
-176   -1232  
-896   -240   
496    256    
-272   768    
464    -464   
80     -336   
-512   -512   
-320   848    
816    -352   
-160   -240   
80     -992   
-608   -512   
448    224    
-224   -112   
-320   112    
128    -256   
368    96     
-192   -48    
432    -400   
-304   -320   
288    352    
-128   -160   
-160   -192   
-32    -400   
1616   688    
672    0      
-1008  -80    
-208   272    
480    864    
224    352    
-576   -1024  
-288   160    
224    544    
-208   -16    
384    -224   
-208   -208   
-208   560    
144    -240   
-32    368    
32     800    
96     -80    
144    -144   
-32    -176   
-96    256    
112    128    
176    48     
-576   368    
800    160    
-336   192    
192    -208   
320    208    
-176   944    
-48    336    
-112   -528   
160    -16    
240    64     
-256   16     
-96    -32    
240    320    
-32    256    
144    800    
48     432    
-272   -880   
-128   -160   
528    400    
32     224    
-192   224    
448    864    
-80    496    
-192   -496   
160    -224   
-112   -576   
128    112    
-48    640    
272    -704   
-768   -368   
416    464    
272    -304   
-320   -128   
224    -208   
288    -656   
-272   -944   
-80    320    
176    592    
-32    640    
128    416    
64     -1904  
-128   288    
112    48     
144    96     
-208   -224   
720    32     
-80    -240   
-160   -128   
336    -48    
-160   160    
16     352    
96     176    
-128   320    
336    16     
-160   -544   
0      -800   
32     416    
-480   -384   
1232   -352   
-592   96     
368    -592   
-96    720    
-96    640    
336    880    
-128   592    
-32    -544   
-48    -528   
224    -192   
-736   -144   
128    -80    
48     80     
-192   576    
16     -240   
-128   -96    
0      -384   
208    -128   
-112   -96    
0      112    
208    1840   
448    -272   
-768   -128   
832    -240   
-400   -224   
80     -512   
48     304    
48     -80    
-48    128    
-208   -528   
304    80     
112    32     
-176   64     
208    -80    
96     0      
-192   144    
128    -96    
0      496    
-32    80     
-240   16     
544    -192   
-256   128    
176    -112   
-288   176    
32     -336   
640    256    
-432   272    
-32    64     
512    -176   
-64    -944   
-4224  1088   
320    656    
1200   144    
-1072  -160   
-768   -432   
1440   -80    
-448   -320   
-352   240    
576    -32    
64     -48    
-112   -16    
-336   -272   
128    0      
304    352    
-80    0      
-144   32     
224    96     
16     144    
-240   -160   
160    320    
304    64     
-1680  -352   
80     -336   
1248   416    
208    -512   
-560   240    
352    -304   
80     -128   
-16    176    
-160   192    
176    64     
160    128    
-208   -128   
544    -32    
-608   176    
272    -528   
256    -256   
-368   -368   
368    64     
96     -192   
32     -64    
400    304    
304    -368   
-832   480    
672    -96    
-544   176    
640    496    
-192   48     
-336   -128   
-80    240    
208    -320   
208    256    
-368   224    
-64    -304   
304    560    
-128   704    
-400   -960   
-80    -32    
240    608    
-304   -176   
80     -32    
-16    -1264  
-64    -816   
208    -176   
-288   -2128  
224    -96    
-48    64     
-448   -144   
128    -144   
1488   -3968  
-2976  -1584  
1408   672    
16     -224   
-224   256    
512    -880   
-688   256    
-320   -288   
592    -144   
576    -128   
-416   80     
-240   48     
16     -464   
432    -112   
16     -32    
176    64     
-336   -208   
208    160    
64     -496   
224    992    
416    -192   
-688   432    
512    -160   
-640   -32    
-320   144    
80     -240   
-32    96     
336    -880   
-384   160    
592    -320   
-176   320    
64     -224   
80     16     
-32    -32    
-48    -160   
-144   -208   
112    -304   
-240   -96    
224    -80    
-592   0      
64     -112   
224    -224   
96     -208   
336    -400   
-512   -416   
-80    -128   
416    -1040  
112    320    
-256   80     
112    208    
224    -48    
0      352    
-224   -144   
-288   -912   
240    -1712  
-512   -336   
-640   528    
160    288    
-288   128    
368    128    
288    192    
32     -96    
64     224    
80     304    
0      544    
64     -32    
-192   -224   
96     -64    
-112   48     
240    -64    
-48    -432   
208    720    
-560   928    
400    -80    
400    -464   
-160   80     
-256   432    
-208   288    
384    -880   
16     -528   
-256   192    
-848   496    
1472   -416   
-592   512    
-528   416    
976    0      
-672   -848   
-128   -1392  
-256   1248   
320    -528   
-224   240    
0      -288   
-48    96     
80     -2976  
208    16     
-176   -192   
-64    -128   
-16    96     
-48    32     
32     -240   
-48    -64    
-448   544    
544    144    
-144   768    
-464   320    
368    16     
288    -864   
-176   272    
16     -192   
560    480    
-336   -304   
-80    64     
0      480    
192    -160   
-192   464    
112    -80    
-400   240    
144    -304   
448    176    
320    400    
-448   336    
-240   -208   
160    192    
224    -160   
0      -48    
-272   48     
224    -256   
-160   -64    
-48    304    
-128   -16    
-496   -352   
736    304    
2384   -960   
-2016  -112   
96     -448   
544    16     
-176   224    
192    -416   
288    176    
-592   48     
-208   -80    
144    -128   
-32    176    
-112   192    
16     224    
272    -16    
-128   208    
-1344  -16    
-16    96     
-416   -128   
80     144    
-672   -960   
-16    -384   
-16    -160   
-784   -512   
528    -624   
-736   -560   
-16    432    
96     -560   
-416   -976   
176    208    
240    1056   
-112   96     
-208   -160   
256    -256   
-576   -32    
256    -32    
-208   -32    
416    464    
240    304    
-368   192    
-128   144    
-80    -640   
-400   -416   
368    304    
256    -752   
-400   -336   
496    816    
-1392  1360   
-288   -208   
144    -544   
-400   -768   
160    -320   
-224   -96    
688    48     
-1136  496    
-240   -448   
-432   -896   
-208   -144   
272    16     
-1056  16     
224    96     
-112   -256   
192    -496   
-80    -64    
64     400    
240    624    
320    480    
-80    704    
-240   192    
272    128    
-256   2304   
736    -80    
-1248  -512   
512    -1312  
848    320    
-224   576    
-224   1040   
32     2032   
224    128    
288    -832   
-272   -256   
-368   752    
304    32     
256    336    
192    -64    
-160   64     
-32    320    
272    144    
320    80     
-224   -1008  
-448   -384   
144    -96    
672    64     
-304   384    
96     528    
-96    -576   
-784   -1056  
368    -368   
-304   -464   
0      -144   
16     160    
-288   128    
256    -224   
-448   -368   
-112   240    
192    608    
-32    -160   
256    192    
0      320    
144    528    
16     160    
-48    144    
32     -144   
-448   -48    
96     -720   
-288   -288   
80     -288   
-560   -544   
368    -16    
-16    48     
-352   -608   
384    -384   
-544   336    
-416   176    
464    368    
-352   48     
256    -176   
64     -336   
64     160    
128    32     
-304   -16    
208    96     
96     -80    
-304   -128   
-144   -208   
64     144    
-224   -272   
-176   -448   
48     -560   
80     192    
304    -256   
-96    -16    
-144   -272   
-16    256    
48     208    
48     464    
560    144    
-336   -128   
-160   -32    
192    -16    
-1136  -480   
1680   -1024  
-480   -32    
-592   -96    
688    352    
176    0      
-544   64     
-80    48     
800    48     
-176   240    
-128   48     
-16    80     
-208   96     
224    -336   
-16    -16    
544    480    
-192   80     
-240   -176   
400    -368   
-176   16     
816    496    
-1664  528    
736    0      
256    -80    
-720   -144   
288    -320   
-112   256    
32     0      
-48    224    
288    0      
-128   48     
-64    176    
-16    0      
96     96     
80     16     
-128   -80    
80     -192   
192    144    
-80    176    
352    32     
-272   -48    
144    64     
-96    48     
208    224    
-528   -224   
416    304    
16     -80    
-352   96     
416    48     
368    448    
-144   816    
-16    272    
320    -256   
272    80     
-144   -160   
-592   208    
672    272    
-272   -48    
96     80     
64     -272   
272    -1616  
-304   -48    
16     96     
400    96     
-432   -32    
112    64     
160    176    
-320   192    
-128   128    
224    32     
-96    -496   
1024   992    
-1200  -256   
-704   -208   
2320   144    
-1584  -896   
-64    384    
416    128    
-592   -112   
160    112    
-16    96     
-16    16     
64     128    
144    32     
240    160    
-368   48     
128    16     
80     256    
32     480    
-64    256    
64     -496   
-384   -928   
-464   208    
1008   80     
-1024  144    
752    128    
208    -336   
-176   -496   
-96    320    
304    288    
-592   -16    
32     64     
-96    0      
224    -176   
416    400    
240    -1056  
-320   -224   
432    -2128  
-224   64     
-208   368    
384    32     
-256   64     
112    96     
-48    -112   
-64    -256   
-272   144    
576    112    
-288   16     
48     -80    
320    1696   
1184   -640   
-1008  1200   
992    -752   
-96    0      
-336   592    
144    -32    
400    -96    
192    80     
-448   -80    
496    240    
-272   112    
-16    224    
528    -80    
-528   -16    
32     -112   
-16    80     
352    0      
-80    -112   
-160   656    
480    -1552  
-160   1088   
112    -32    
224    64     
-576   -224   
512    336    
-96    64     
-272   16     
272    160    
32     -576   
-16    0      
-48    -288   
-80    96     
-64    256    
144    -80    
336    -224   
-128   752    
448    528    
-320   208    
64     -16    
224    112    
-240   -480   
448    -704   
-240   0      
-144   32     
304    64     
-352   -144   
336    112    
0      -288   
192    640    
352    512    
-240   176    
240    -256   
-528   112    
384    -528   
-96    48     
128    736    
704    48     
256    -240   
-208   -720   
192    -176   
-48    -464   
-32    96     
64     256    
48     144    
-16    -368   
48     -336   
144    416    
-16    144    
-144   80     
32     -144   
144    352    
80     48     
-32    -1200  
-48    -624   
-32    -80    
-112   -304   
208    -96    
0      32     
-32    0      
-208   -512   
368    560    
-240   528    
384    -688   
336    240    
224    -256   
-160   0      
-112   -512   
48     -624   
-128   -224   
-32    -400   
-16    352    
96     208    
96     -112   
-96    -96    
144    -112   
0      0      
-80    160    
368    -512   
144    112    
-288   16     
-416   -960   
-208   96     
304    -224   
-448   368    
560    -1152  
-48    128    
-128   -592   
-160   -144   
416    0      
80     -32    
-64    96     
-224   192    
16     -256   
352    -432   
-240   352    
144    -96    
-368   -32    
-256   -144   
128    336    
304    -288   
-384   -96    
-80    -320   
64     -144   
64     -96    
-48    -80    
128    16     
-128   32     
208    -144   
-128   32     
-592   -944   
2416   -736   
-864   1232   
-656   -336   
1088   16     
-320   912    
-160   144    
1248   128    
-576   1952   
192    -48    
-16    688    
400    -336   
256    80     
96     288    
-240   176    
48     -496   
128    -416   
64     -544   
16     400    
-208   -224   
64     240    
-784   -832   
592    -576   
576    272    
-624   160    
752    608    
-80    -960   
-528   -208   
272    1376   
240    1760   
-16    144    
224    -240   
-368   0      
112    464    
64     192    
240    -160   
-32    -352   
16     -1488  
128    -1264  
-256   -848   
336    -240   
32     -112   
80     176    
-480   -528   
144    -224   
240    -288   
-672   176    
-528   -2048  
-624   -560   
752    -272   
-576   432    
-64    -128   
368    -304   
-256   112    
-112   -592   
720    -544   
-480   -80    
96     -752   
-272   -192   
-80    128    
-208   -704   
112    160    
432    144    
-224   -80    
-560   16     
384    -784   
-528   256    
464    96     
-528   -144   
-112   192    
640    944    
-112   -1360  
128    192    
800    352    
-1120  416    
-48    656    
576    112    
-432   -624   
96     112    
240    -336   
-48    -176   
16     64     
16     -432   
176    48     
96     -96    
-64    64     
-16    272    
-496   -160   
-272   256    
800    -48    
-448   1136   
304    800    
-32    240    
-320   0      
-512   -48    
896    -160   
-176   240    
-384   -32    
0      480    
-128   32     
128    64     
-16    112    
-32    -144   
-288   112    
-416   -112   
-128   16     
512    -320   
16     -480   
-544   -176   
208    16     
-128   -352   
352    -80    
-432   -304   
-128   32     
224    -16    
-240   -80    
176    112    
288    240    
-512   224    
-48    176    
224    64     
-160   624    
-192   160    
-448   -80    
464    240    
144    -128   
-720   208    
240    64     
192    16     
112    208    
240    -112   
-288   0      
64     192    
-32    -96    
-16    -16    
368    560    
-976   240    
224    -80    
112    848    
-608   464    
112    -304   
-96    208    
160    -80    
-16    -192   
-160   -160   
16     16     
240    512    
416    16     
-400   -16    
-96    96     
128    192    
-208   1568   
2944   -352   
-1840  256    
-160   32     
624    -48    
160    16     
-672   0      
288    512    
-336   -96    
112    48     
288    -16    
-80    -208   
-272   128    
-96    272    
496    -352   
-144   320    
-192   128    
0      -288   
-64    16     
16     -208   
-480   -672   
864    -304   
96     304    
-1136  -80    
720    -32    
0      272    
176    -192   
-640   -16    
336    -16    
16     256    
496    -160   
-304   96     
-112   -80    
-256   208    
-64    128    
160    48     
-368   80     
-80    -144   
352    144    
112    -32    
-208   32     
-16    64     
48     128    
-32    -80    
144    288    
32     -112   
-272   240    
0      -32    
96     96     
1248   400    
-3888  2240   
672    0      
1696   -224   
-1472  -288   
-64    -16    
672    112    
-32    432    
-752   592    
384    128    
224    0      
-432   -144   
-96    128    
176    -32    
-560   16     
288    -16    
-16    16     
-208   128    
128    -32    
-64    48     
0      160    
496    992    
-1136  -528   
-432   160    
544    368    
576    -336   
-544   336    
640    80     
-352   160    
16     32     
208    -160   
-192   96     
-80    96     
96     128    
192    -176   
-304   16     
112    80     
-128   -96    
288    -128   
144    32     
-64    160    
-16    -16    
-80    368    
1120   -112   
-576   272    
32     288    
16     0      
112    272    
144    416    
-608   -64    
-224   80     
496    128    
-16    448    
208    0      
80     -64    
-784   384    
320    -112   
-144   256    
-240   32     
128    -16    
-240   64     
96     80     
112    112    
-16    96     
48     16     
-192   -192   
320    128    
224    160    
-320   64     
192    288    
1504   3264   
-1664  2048   
1184   0      
1104   -240   
-1664  64     
-480   240    
1072   -304   
-96    -224   
-448   -16    
-16    -128   
720    480    
-320   -208   
480    496    
-112   -256   
-416   16     
32     112    
432    144    
-160   112    
160    240    
224    336    
-112   -960   
-144   -432   
288    144    
-368   112    
-112   496    
496    -64    
-272   16     
64     -208   
-112   -624   
112    -416   
224    896    
-32    560    
128    -32    
-176   -288   
240    -160   
-96    64     
208    416    
96     160    
-224   160    
224    432    
144    -288   
-560   -400   
304    -496   
-32    -848   
64     -544   
-96    592    
240    432    
-560   -272   
-192   672    
336    -368   
0      -80    
288    496    
-464   -592   
-656   -352   
944    -48    
-448   -96    
-32    144    
0      1104   
640    1520   
-288   -352   
96     304    
256    64     
-144   -80    
64     16     
176    -80    
16     -16    
16     80     
96     80     
-160   32     
-48    16     
-64    112    
144    64     
-96    64     
-64    112    
-128   -32    
208    64     
-160   432    
192    -224   
-304   48     
224    -384   
144    112    
48     -2256  
80     -64    
-352   80     
960    16     
-16    64     
-192   112    
-16    -16    
288    -128   
384    -272   
256    160    
-384   240    
64     -240   
112    128    
0      -208   
144    64     
-224   16     
-80    -192   
320    304    
192    208    
-144   32     
-576   -272   
304    240    
-208   80     
-48    272    
432    288    
64     -240   
400    -416   
-240   -48    
-112   208    
-80    128    
208    -304   
-96    336    
32     -2208  
-16    -32    
-288   192    
288    208    
384    176    
-272   464    
-144   304    
288    -192   
192    0      
-176   -208   
-16    288    
-128   320    
48     304    
240    -112   
112    112    
-224   -400   
112    32     
-320   -976   
2176   -608   
-464   768    
-512   224    
400    528    
-320   832    
368    -272   
576    -1408  
-384   1008   
144    1056   
416    -32    
-16    -176   
272    16     
64     -272   
-464   -48    
176    -32    
336    528    
96     496    
-80    1296   
48     -128   
48     -400   
-576   -784   
432    16     
1472   -1136  
-1280  1280   
464    1168   
192    -352   
-256   -1136  
-608   -944   
448    32     
32     800    
528    464    
-64    -304   
16     -848   
-112   176    
96     32     
784    -80    
-592   -208   
288    -240   
64     -16    
16     32     
32     64     
-240   192    
368    -160   
912    1488   
1696   1488   
-752   -1152  
-336   -416   
832    -544   
-320   -16    
160    -272   
240    -176   
-144   -160   
96     -160   
-256   80     
-320   -384   
816    -480   
-128   -768   
-560   304    
480    -464   
624    -288   
-256   -48    
-80    -16    
48     -16    
160    -96    
16     -128   
-720   352    
288    -80    
48     -64    
-352   -1360  
-432   -2544  
1568   512    
64     -320   
-1296  -144   
224    -48    
336    -112   
-288   -608   
-352   -288   
-624   272    
416    32     
-352   288    
-144   16     
-128   32     
0      -240   
192    -16    
464    -48    
-400   80     
112    -336   
-128   -144   
256    880    
400    32     
-608   32     
320    -16    
-304   -80    
32     32     
-80    32     
0      -96    
-80    64     
224    -112   
112    80     
-464   -256   
416    -32    
-288   -1616  
0      192    
320    -112   
-80    272    
-144   64     
624    144    
-336   -32    
80     -432   
-400   -144   
384    -128   
-336   0      
-160   16     
-192   -96    
192    -864   
224    208    
-240   -640   
32     144    
176    16     
-48    80     
-160   -112   
560    336    
672    -400   
-784   -256   
-96    48     
464    224    
-384   144    
32     96     
-1072  -96    
128    -368   
-64    160    
32     -352   
176    208    
-192   -640   
240    -256   
-112   -336   
-224   -368   
-208   -112   
576    -256   
-368   288    
-112   -192   
112    144    
32     -272   
48     416    
-96    304    
-32    -320   
-32    -128   
-192   240    
128    -784   
112    -80    
-1248  -2480  
48     -352   
1072   -32    
-1248  -448   
384    208    
480    -384   
-704   320    
-320   -944   
128    -144   
480    272    
-240   -144   
-32    -96    
80     160    
-176   -176   
208    -112   
-128   352    
112    -320   
32     -336   
208    192    
-80    -16    
-480   -1440  
80     -144   
80     272    
-576   192    
720    -160   
-336   -528   
-1184  -512   
16     272    
-272   208    
-112   80     
80     128    
-736   -320   
-192   -112   
64     32     
272    32     
-272   -16    
-112   48     
336    80     
-192   128    
-432   -272   
416    96     
-256   -128   
-560   -96    
80     -128   
-80    0      
64     -144   
-1152  144    
-112   -112   
-416   80     
1312   496    
-1680  464    
-128   -368   
480    -176   
-416   -304   
-640   -16    
896    176    
-96    720    
-704   624    
416    192    
112    -64    
-240   -112   
-128   160    
0      -144   
160    160    
-16    -256   
-736   80     
-48    16     
224    608    
-128   432    
-144   80     
496    320    
-1648  64     
688    320    
176    736    
480    -224   
-192   592    
-544   112    
-16    0      
-64    -16    
80     -48    
-800   -32    
-144   144    
32     -16    
448    96     
-608   -160   
64     0      
32     128    
112    432    
-144   192    
-272   -176   
80     -16    
-304   -160   
336    -128   
288    16     
-224   -416   
-592   224    
416    224    
-112   -256   
-272   112    
-112   -16    
704    336    
-96    -272   
-720   400    
928    224    
-240   -640   
-368   0      
112    304    
-16    80     
304    64     
-112   0      
-496   32     
144    96     
-864   -144   
160    0      
-208   -384   
-448   48     
304    208    
-176   0      
-240   624    
1472   1312   
-720   768    
-240   144    
704    -160   
-352   -336   
-864   32     
112    160    
688    320    
-368   -224   
-128   -224   
0      0      
-16    208    
352    272    
-176   -432   
-112   368    
-304   368    
32     96     
-64    64     
-64    -16    
-80    -288   
-32    -208   
-96    -144   
144    336    
-496   320    
-352   176    
112    64     
208    16     
0      -656   
-32    -736   
-96    -112   
-192   512    
208    112    
224    -320   
-80    288    
-448   160    
48     -160   
160    96     
64     128    
-208   -1040  
48     112    
240    272    
-208   -144   
-48    -224   
80     16     
384    64     
-832   -672   
288    -1088  
16     160    
-384   112    
48     480    
240    -64    
32     -416   
-688   304    
800    608    
-704   768    
336    80     
48     352    
-144   -816   
-560   32     
496    816    
128    544    
96     -256   
-192   176    
-48    336    
64     -64    
32     0      
-352   -272   
224    -240   
352    96     
-112   176    
160    -64    
48     64     
-32    0      
-16    144    
64     -32    
96     16     
368    288    
-384   16     
112    32     
80     96     
112    64     
-192   -560   
-288   -64    
-320   256    
208    16     
272    224    
-160   32     
-480   -144   
48     -208   
32     432    
-240   256    
240    -128   
80     128    
-128   240    
96     -96    
-16    64     
224    16     
-96    192    
-112   256    
-80    112    
-128   0      
800    -608   
-144   528    
432    48     
-416   128    
-16    -176   
256    80     
48     -304   
128    -576   
-48    -16    
64     176    
32     96     
32     288    
-112   400    
80     160    
-32    32     
-240   208    
32     560    
688    272    
-304   -416   
-448   -96    
192    144    
192    336    
80     272    
240    -368   
-336   -16    
-208   224    
608    368    
48     -96    
-336   0      
-1520  -416   
592    -144   
448    240    
-656   240    
-272   672    
896    80     
-992   144    
-256   -240   
528    144    
-336   -16    
-128   224    
32     64     
96     -528   
176    176    
-32    160    
80     80     
-352   -96    
256    -256   
-128   -192   
-32    -16    
-96    -64    
896    -480   
-1648  240    
976    288    
416    976    
-96    320    
-48    -96    
176    -128   
112    80     
-272   -352   
-192   80     
336    272    
-144   -96    
-128   144    
112    96     
288    -192   
-176   144    
-192   -64    
480    -112   
0      96     
-192   48     
-32    -112   
784    384    
112    -48    
-448   -240   
176    384    
624    -336   
-256   960    
384    -864   
-96    0      
208    -80    
-128   64     
-272   384    
176    304    
-64    -64    
-176   448    
-272   0      
48     -480   
112    208    
64     -256   
80     176    
-304   -928   
48     192    
-112   16     
240    320    
-128   -48    
-144   112    
272    -64    
160    -32    
-800   1216   
416    4048   
1152   864    
-1440  -688   
-672   -176   
1440   -640   
-32    -96    
-592   -1440  
368    160    
-336   432    
496    352    
176    -80    
-352   128    
-208   -32    
464    16     
96     80     
144    -16    
-512   48     
0      -224   
144    528    
752    -176   
-1040  208    
272    -224   
640    -96    
-112   -48    
-224   112    
336    128    
-144   0      
-32    160    
496    -336   
-384   112    
-288   0      
448    0      
-64    -336   
192    -16    
32     -352   
-112   16     
-112   -224   
208    -112   
-416   32     
176    48     
-96    80     
416    112    
-176   144    
-48    192    
464    288    
240    48     
-224   192    
-16    -160   
176    96     
-176   -160   
64     0      
-96    -256   
400    -176   
448    1136   
560    -1632  
-592   288    
32     144    
624    64     
-320   -80    
-128   -1104  
432    -80    
-176   320    
-64    48     
112    192    
192    16     
-32    432    
-32    128    
384    -400   
112    -144   
-288   -224   
16     96     
-48    192    
-416   -192   
176    144    
16     -96    
384    -768   
-704   160    
256    80     
112    -384   
-48    -432   
-848   -2656  
-368   208    
1344   -48    
-912   128    
768    224    
-208   -496   
-816   -16    
48     -528   
224    -128   
304    208    
-592   432    
208    -592   
0      -32    
192    -2160  
-160   32     
48     208    
-16    96     
192    336    
80     208    
-224   -304   
448    928    
-1008  -144   
-48    288    
1008   -192   
-720   -48    
128    -80    
-80    -384   
288    -320   
-208   -208   
32     64     
-400   384    
128    320    
384    -192   
-304   96     
-336   -224   
0      -144   
96     0      
128    0      
-128   112    
80     -64    
96     -160   
272    -192   
-416   -96    
224    -144   
176    160    
-336   -2048  
480    -48    
-224   -80    
-128   224    
-544   -1568  
2384   48     
-1760  176    
-448   -192   
1120   64     
-1488  -192   
176    -192   
736    256    
-368   32     
-208   -384   
-48    176    
336    -272   
-224   32     
48     -16    
-192   -208   
288    160    
32     -176   
-304   -240   
192    -160   
-32    80     
-80    -32    
528    992    
-448   -992   
-2240  208    
704    304    
448    -128   
-208   -368   
-272   336    
288    -1616  
-80    -512   
-32    -48    
-240   -112   
48     0      
160    -16    
-208   -112   
-208   0      
112    0      
48     -368   
0      -192   
-32    -272   
-304   272    
16     -96    
112    160    
-400   -128   
0      -48    
176    -560   
-64    80     
176    512    
688    -48    
-464   -128   
-96    736    
432    -208   
-304   144    
240    0      
512    528    
336    -432   
-368   512    
32     512    
-288   32     
608    -64    
-128   112    
-256   32     
-144   32     
400    32     
-128   -48    
128    544    
-368   0      
80     48     
528    -448   
-832   -1408  
-272   112    
-800   1968   
736    -304   
-192   -896   
-320   128    
816    656    
-272   688    
-640   -432   
64     -688   
208    544    
-64    -512   
-288   -320   
-208   -32    
352    320    
160    -336   
-96    192    
-144   640    
-144   288    
272    0      
-16    -368   
-160   112    
-224   416    
208    -112   
-448   -400   
176    -192   
-48    416    
32     240    
0      -80    
160    144    
-64    -176   
-48    608    
80     -80    
-336   352    
32     48     
64     16     
-432   -176   
16     -368   
224    368    
-32    1168   
-192   -48    
0      -224   
368    -240   
48     368    
-32    -64    
-288   -16    
304    528    
464    416    
-608   16     
-192   -368   
80     -96    
176    496    
-496   -784   
752    32     
-704   144    
-176   480    
-560   -656   
128    -1216  
-336   -1056  
544    -592   
272    1280   
-96    656    
-288   192    
-192   -160   
272    -288   
176    96     
64     -192   
-304   32     
336    -160   
-240   64     
80     144    
48     -16    
-256   144    
-432   -80    
48     128    
176    -64    
-432   32     
384    448    
592    144    
-144   240    
-528   352    
128    96     
208    224    
80     -416   
48     240    
-224   720    
208    -336   
496    -224   
-1072  -336   
240    -32    
352    -128   
208    -16    
96     224    
-320   160    
-64    224    
176    -112   
112    32     
32     -64    
-208   -96    
-176   -64    
288    -48    
-16    -272   
-256   -112   
-608   -576   
-192   400    
240    -368   
112    -384   
192    -688   
-464   -832   
96     688    
96     448    
32     304    
160    -96    
-144   80     
-160   736    
128    -560   
128    608    
-64    32     
-192   -64    
16     240    
160    -272   
-112   240    
-208   192    
48     -128   
272    224    
-80    32     
-176   320    
240    96     
-32    96     
-96    0      
160    256    
-752   64     
1472   -912   
-688   864    
672    816    
144    336    
-1920  112    
1600   224    
80     384    
-592   208    
-144   -96    
208    0      
-144   32     
-64    80     
-112   -80    
480    96     
-672   -208   
336    64     
48     336    
-96    416    
112    192    
112    48     
-96    64     
864    -400   
-1472  224    
1312   -192   
-160   160    
-1072  64     
496    -96    
320    144    
176    -48    
-192   -32    
-32    208    
-224   160    
304    80     
208    192    
-144   -32    
-320   112    
384    240    
-496   176    
320    -80    
-256   -176   
64     112    
32     208    
384    -384   
-448   432    
512    -16    
496    -176   
-48    240    
0      576    
-592   576    
480    224    
-544   160    
-144   -96    
-64    -96    
368    96     
448    144    
-304   -256   
-400   -64    
368    -80    
400    -272   
-272   -176   
32     336    
-112   128    
0      96     
368    176    
528    464    
-512   -64    
-192   800    
352    208    
-384   0      
-384   800    
2624   -2176  
-432   1280   
48     528    
-48    -304   
-432   368    
352    -288   
96     592    
-112   -112   
48     512    
400    48     
-240   224    
144    16     
144    128    
256    240    
-176   272    
-256   64     
528    64     
-256   -32    
-544   -624   
-48    144    
48     -112   
-128   224    
784    48     
-464   -224   
-208   336    
528    32     
-560   48     
640    80     
-256   128    
80     96     
-272   256    
112    176    
-384   -256   
512    0      
-192   -64    
-176   48     
80     -160   
-128   80     
112    128    
-64    176    
304    48     
-256   64     
-528   -128   
544    -48    
96     -80    
-224   400    
272    336    
-384   368    
512    -224   
-224   64     
-128   -368   
-208   -288   
432    -1008  
112    -32    
-384   16     
416    320    
-80    -160   
256    -128   
-128   -112   
-160   -64    
-272   -16    
208    224    
272    48     
-96    0      
176    64     
-224   -720   
64     -240   
16     -1200  
288    256    
-272   80     
-16    160    
208    32     
-208   224    
0      -176   
112    0      
336    96     
-160   288    
16     -288   
80     -640   
112    80     
-1040  -1824  
1232   -592   
-304   -256   
-512   80     
1232   224    
-672   -32    
-320   128    
0      -192   
656    -352   
64     480    
-336   304    
-80    -208   
80     160    
304    -288   
-192   368    
0      -576   
96     -96    
-48    -160   
112    192    
144    -256   
544    1344   
-1456  48     
384    352    
1120   576    
-496   96     
48     128    
-288   -448   
112    -208   
64     -496   
192    32     
-48    -400   
-320   192    
368    -496   
48     272    
-272   160    
128    112    
96     16     
-176   48     
32     -48    
336    224    
-240   160    
96     192    
176    192    
-144   -16    
80     336    
-192   -224   
96     16     
224    -208   
224    336    
-960   384    
1472   -416   
560    336    
-1184  -896   
880    224    
-496   -336   
80     80     
672    368    
-64    720    
80     96     
-432   128    
272    48     
64     80     
-16    -48    
192    -32    
144    -80    
-16    -112   
240    304    
16     -256   
-32    208    
48     -32    
496    320    
-2176  64     
496    -64    
704    -432   
-1008  -1424  
1056   848    
-1024  880    
-80    96     
512    -1232  
-48    112    
288    -176   
-448   -32    
48     -448   
352    -192   
-240   416    
48     64     
32     0      
-64    640    
288    336    
112    352    
-48    -16    
16     -1968  
480    1344   
-816   832    
-48    544    
688    -16    
-336   352    
624    -176   
48     -160   
-176   -560   
-160   -80    
-336   -224   
224    64     
-48    48     
384    -528   
112    -464   
16     -256   
192    -480   
-160   80     
-80    528    
-48    -16    
224    160    
176    96     
-16    -32    
-160   -96    
464    -128   
0      0      
-416   464    
288    144    
112    -128   
-1072  -976   
-416   -1504  
-512   640    
496    -1312  
80     192    
-144   -704   
80     1456   
-496   528    
384    0      
16     -48    
128    192    
-400   -592   
-304   -240   
-1024  -64    
448    -272   
-128   -144   
-352   304    
-224   640    
608    -320   
192    1008   
-112   176    
-224   -448   
192    -320   
0      256    
288    -128   
-320   -496   
256    576    
32     784    
-48    -1104  
-80    -432   
-192   -160   
256    -32    
240    -592   
-288   -1968  
-16    -176   
-80    800    
-448   -32    
48     -144   
352    -64    
-320   144    
80     144    
-304   -368   
320    32     
-16    416    
80     672    
-768   -592   
176    -80    
384    528    
-64    -80    
16     -112   
160    1136   
-288   16     
-512   208    
368    336    
-304   64     
48     160    
512    704    
-688   1312   
16     -1056  
288    -1120  
16     144    
-80    -128   
48     64     
16     -96    
-64    -400   
-400   288    
176    176    
-240   272    
96     -432   
32     144    
-16    576    
16     160    
-304   16     
64     96     
96     592    
-352   1488   
-16    176    
-288   -640   
-160   -528   
-944   -240   
-768   848    
912    -464   
-368   -592   
-400   -1136  
96     -1152  
64     -192   
-576   592    
240    -32    
32     368    
-64    -352   
-192   96     
-304   -288   
304    -128   
-16    -144   
-64    0      
-432   -352   
48     -224   
256    160    
-480   -144   
-96    144    
-160   2016   
112    256    
16     -32    
400    224    
-400   -16    
256    16     
-192   -32    
208    80     
-192   -160   
-160   144
[truncated: 224,011 more chars]
