# Supplementary material for: A Fault Diagnosis Method for One‐Dimensional Vibration Signal Based on Multiresolution tlsDMD and Approximate Entropy
Source: Hindawi journal article supplement (doi:10.1155/2019/3262818), 2019-01-01
Supplement: f1 [file 3262818.f1.zip › 3262818.f1/gear signals/pitch errors signal/Data12.txt]

2256   -96    
-1808  -656   
-288   160    
1680   -16    
-704   0      
-256   256    
544    16     
48     112    
-144   144    
-112   160    
48     -96    
-64    192    
96     0      
-160   16     
96     144    
256    112    
48     -192   
-208   176    
624    -720   
-208   -640   
-1824  112    
1312   -96    
688    208    
-384   16     
-208   176    
512    288    
-304   -64    
160    -32    
16     80     
224    256    
-208   -80    
-48    112    
768    -32    
-544   -816   
384    544    
112    48     
80     288    
144    96     
-128   96     
-432   -624   
624    768    
-128   96     
-1408  240    
528    -432   
80     -160   
256    -144   
-288   208    
-160   -112   
-384   48     
240    64     
400    -208   
-96    240    
-400   -192   
416    64     
-80    -240   
-160   -80    
592    -320   
16     144    
-288   96     
128    96     
256    96     
160    -16    
224    720    
-656   -176   
-160   96     
768    -608   
112    128    
-1360  -2016  
2576   -2640  
-496   976    
384    -352   
288    256    
-688   464    
48     -464   
336    368    
384    -400   
-880   48     
96     64     
80     -128   
496    128    
-208   -384   
-288   112    
0      -368   
128    256    
304    -208   
-368   208    
608    -144   
-1184  176    
992    -96    
-368   0      
432    0      
400    -144   
-352   112    
432    -16    
-272   144    
304    336    
-96    352    
64     -48    
128    128    
-112   -48    
96     32     
-32    0      
80     -144   
-48    -32    
288    160    
-32    80     
16     -32    
112    336    
-144   -208   
64     384    
-240   -352   
128    -272   
384    -448   
-112   64     
-48    64     
0      -64    
128    48     
-16    528    
-32    -144   
0      -1024  
-384   192    
512    1056   
-736   1440   
688    -160   
-48    -400   
0      -32    
160    208    
64     -144   
128    -224   
-48    -32    
16     -1520  
-96    -288   
-32    -416   
192    -624   
272    64     
128    -176   
-96    -192   
112    -1920  
48     384    
400    208    
-368   544    
544    512    
-160   400    
480    16     
-368   -96    
-224   -464   
144    -64    
48     768    
-16    -96    
608    2288   
448    -416   
-1152  -496   
416    -720   
464    -320   
-192   -320   
-128   688    
-112   -704   
160    -272   
-80    -512   
192    -64    
-96    -80    
0      256    
32     48     
-48    32     
-208   80     
-48    240    
32     -480   
112    -112   
0      112    
-224   1488   
464    -32    
-128   192    
-464   592    
256    -80    
352    256    
-320   1040   
-176   112    
288    176    
-64    -208   
-528   -272   
80     560    
112    -160   
80     320    
192    16     
-400   16     
48     -272   
480    -608   
384    928    
-336   304    
-320   32     
32     -16    
336    -336   
-16    -128   
-256   144    
80     -128   
-80    128    
-80    160    
160    -448   
-144   64     
-688   1184   
3760   -1184  
-1248  -16    
-912   720    
1008   176    
32     640    
-720   -192   
448    -832   
-160   448    
-224   128    
96     96     
48     64     
-1408  -208   
304    -160   
224    0      
-32    -128   
-176   16     
304    -304   
176    160    
-112   -144   
816    224    
-1824  832    
336    -272   
576    -592   
-320   -32    
160    -144   
-624   -1424  
-432   -704   
528    1312   
-208   992    
-16    -448   
16     -352   
144    -80    
-384   416    
256    -912   
-368   -80    
320    80     
-240   -272   
-512   192    
256    0      
-336   -128   
16     -80    
64     -368   
-576   -608   
-368   -432   
448    -400   
-368   -1056  
896    -2608  
-320   -1616  
160    304    
144    720    
-592   448    
144    512    
-560   0      
1072   -672   
-416   240    
96     -288   
-32    -560   
-336   -656   
464    -496   
-160   -400   
-16    240    
16     272    
-32    352    
-32    -176   
-624   -112   
-112   -48    
288    128    
336    224    
-256   144    
784    496    
-2048  -640   
656    448    
496    -240   
-512   560    
-480   16     
-336   224    
928    304    
-784   -1168  
-576   -512   
-1104  224    
256    304    
-176   -32    
-96    144    
-512   -64    
-496   336    
544    112    
-160   -160   
-528   -592   
-800   -912   
160    -672   
416    -80    
-704   -192   
-32    96     
48     544    
-64    0      
416    -912   
-160   -608   
-272   -144   
-544   80     
-64    0      
96     256    
16     -224   
-64    -336   
288    -80    
-96    304    
64     464    
-96    -32    
-256   -48    
-32    304    
-112   320    
96     176    
-128   -240   
176    -48    
-144   -336   
32     -800   
-96    -592   
48     -128   
128    -816   
-400   -576   
144    -640   
320    -208   
-1392  48     
960    352    
384    224    
-336   -128   
208    304    
-416   224    
176    608    
-48    368    
16     320    
-480   -96    
-224   128    
96     368    
288    496    
-160   -176   
96     -240   
144    0      
192    112    
80     320    
16     -208   
-528   224    
288    320    
176    352    
-432   -160   
-128   -144   
128    -416   
-176   128    
32     224    
48     240    
-496   -576   
1424   1440   
-384   640    
-608   -96    
32     128    
-208   -64    
352    96     
112    0      
208    288    
-800   -208   
48     80     
352    -64    
-208   80     
-208   64     
-16    384    
320    -208   
-160   -272   
-304   240    
352    288    
-304   240    
-80    -80    
192    -1360  
-592   96     
688    96     
-816   80     
208    176    
-16    -464   
64     32     
-848   -64    
-32    -1152  
160    144    
32     16     
-32    80     
-240   112    
112    32     
160    80     
-144   -208   
-48    -160   
208    64     
-224   192    
416    32     
-288   -32    
-32    80     
-128   16     
192    192    
-272   -128   
64     320    
384    -96    
-560   112    
352    32     
-64    304    
352    656    
-32    832    
304    64     
-256   -384   
656    -112   
-1168  128    
384    208    
-304   80     
96     -96    
128    64     
-16    224    
96     -32    
-416   64     
352    144    
288    48     
-384   128    
-176   128    
416    80     
-144   -224   
32     48     
-48    128    
-160   528    
2016   16     
-1392  80     
480    720    
1632   -16    
-1232  64     
800    160    
32     288    
-304   -16    
112    128    
-144   96     
96     32     
-48    16     
208    208    
320    0      
-176   224    
-16    -64    
80     -352   
112    -16    
-240   48     
496    1120   
-1232  48     
96     240    
624    -256   
-976   -64    
768    176    
544    832    
-480   0      
-112   -48    
-224   -48    
-16    336    
208    304    
16     48     
-624   -448   
160    144    
512    400    
-368   384    
416    224    
-352   -64    
336    32     
-16    64     
-80    176    
16     32     
96     480    
-128   -16    
-576   272    
352    32     
-176   112    
224    -352   
-336   1584   
1168   -640   
-1856  80     
528    -80    
320    -176   
-32    224    
-96    160    
-96    256    
16     160    
-480   256    
320    64     
144    96     
-336   64     
128    32     
208    272    
-64    48     
-176   144    
208    0      
432    640    
-736   1072   
400    304    
32     -272   
-96    -160   
752    224    
-432   -192   
-16    752    
400    -2128  
-144   -64    
-128   80     
0      -416   
-80    240    
272    -112   
32     -16    
80     32     
-496   96     
464    1088   
-288   512    
48     176    
288    -144   
-224   -336   
32     112    
-144   -2144  
96     272    
192    80     
-384   -112   
608    400    
-144   80     
-144   160    
352    432    
-224   768    
240    592    
-224   -528   
304    0      
-112   -416   
-112   -352   
320    544    
-144   480    
-624   -96    
176    -368   
-48    -256   
96     -288   
80     -128   
80     -80    
96     320    
-160   32     
192    -112   
-144   -160   
112    352    
48     32     
-96    -320   
208    -336   
48     544    
-96    336    
432    -256   
-208   528    
208    -64    
160    96     
-544   -48    
368    304    
112    48     
-96    144    
-144   -928   
-224   -640   
256    608    
-32    64     
-32    224    
144    -224   
-16    784    
304    -288   
-240   208    
-32    -1088  
48     192    
-112   240    
32     96     
-48    336    
176    160    
-176   -112   
-176   -112   
208    112    
208    -256   
176    -64    
-752   688    
928    -320   
-832   -240   
384    128    
-64    144    
-80    128    
80     112    
-144   128    
32     -144   
112    64     
112    144    
-176   272    
-80    -96    
304    -912   
48     320    
208    -32    
16     16     
-320   176    
112    512    
288    128    
-256   16     
-112   -192   
48     -16    
64     0      
80     128    
64     336    
-128   -112   
144    -32    
-80    -128   
-576   -592   
1920   -656   
368    1216   
-608   -304   
688    192    
32     272    
-224   -240   
1264   -368   
-288   864    
-64    672    
-192   272    
432    -784   
336    -16    
80     112    
-336   -16    
64     -80    
208    -160   
144    -320   
192    -80    
-192   64     
48     352    
-112   -752   
-976   1168   
1696   -720   
-864   -272   
112    -608   
224    -816   
-1024  -2240  
-64    -1040  
464    304    
-80    -752   
160    -96    
-208   -160   
128    -368   
32     -448   
96     128    
256    -480   
48     656    
528    736    
48     304    
-272   -496   
32     32     
-112   -64    
336    144    
-528   64     
432    576    
-80    432    
464    1408   
-832   1008   
-448   624    
928    -560   
-464   -128   
48     144    
-160   48     
16     -144   
-80    1088   
912    -544   
-224   752    
-352   336    
-80    -64    
416    928    
464    224    
-480   -208   
16     240    
672    128    
64     208    
16     -480   
-656   48     
640    256    
384    -608   
-848   -208   
208    2720   
224    -48    
-1248  -656   
592    1264   
208    848    
-64    -96    
-256   -800   
-128   -688   
-336   -864   
160    176    
0      144    
-272   336    
-224   -384   
48     -176   
176    -160   
-192   -144   
-128   64     
416    32     
-144   1728   
448    1008   
-32    -48    
-144   -1056  
192    192    
912    -400   
-640   192    
-64    -160   
80     368    
304    224    
96     288    
-128   -112   
64     304    
-64    -16    
0      -224   
16     -192   
352    32     
-176   -272   
-528   -752   
416    -48    
80     -448   
-96    64     
16     -160   
-320   -352   
384    -176   
240    -16    
-192   96     
160    192    
-368   80     
160    48     
336    96     
-224   80     
-448   96     
-192   -672   
256    -64    
96     -416   
-480   -16    
32     16     
432    -96    
-656   -32    
144    544    
-464   96     
208    96     
-32    0      
-192   -112   
112    32     
-64    16     
-48    128    
352    -432   
-192   272    
-176   -672   
176    -208   
112    576    
96     -192   
-288   -224   
-16    112    
-112   224    
32     -112   
-64    -368   
0      192    
96     160    
-32    -144   
-496   -1120  
1552   -1872  
-1232  640    
496    -432   
-768   16     
-592   112    
-304   -304   
608    -112   
16     -432   
-848   320    
448    -64    
-16    176    
288    -16    
-352   -176   
16     0      
96     352    
0      -512   
112    320    
128    0      
-368   -16    
112    144    
144    1424   
1008   -256   
-1248  -272   
-240   272    
432    -32    
-176   624    
368    -176   
-304   32     
16     -160   
-224   320    
512    -256   
0      144    
-128   16     
-480   -16    
352    96     
160    -48    
-192   64     
-48    -32    
224    112    
-352   0      
-80    -16    
16     16     
16     112    
0      -144   
208    304    
176    -208   
-288   240    
-16    -64    
-32    16     
1856   512    
-4096  2032   
-1440  32     
2848   -512   
-336   256    
-720   -432   
-496   480    
-560   16     
-432   304    
-176   128    
592    48     
-496   -144   
-240   32     
128    256    
112    160    
-368   224    
272    -16    
-304   48     
-16    256    
16     64     
-208   160    
-96    -320   
592    -512   
-1152  32     
560    -1040  
-448   352    
240    -160   
-304   64     
656    80     
-80    -80    
-592   192    
112    -16    
-112   144    
112    64     
144    256    
-320   -112   
-304   128    
-112   -112   
160    304    
-224   192    
-128   0      
-96    128    
144    -400   
-864   256    
448    -256   
-432   0      
448    80     
208    80     
-352   -64    
320    416    
32     -112   
-96    96     
-304   -384   
-304   192    
-288   64     
528    -256   
-576   256    
480    -176   
-96    -144   
-96    208    
160    128    
-16    160    
0      80     
32     -16    
-64    128    
-48    192    
-432   192    
144    -32    
192    96     
-448   -32    
0      -352   
1792   -2064  
480    48     
-928   304    
-560   336    
624    16     
-80    576    
256    496    
-416   -16    
80     96     
-112   -176   
336    112    
-576   -144   
336    304    
-384   -16    
336    96     
-416   144    
320    -48    
-352   -112   
192    -1168  
-240   16     
160    624    
48     496    
144    -48    
0      -304   
-160   32     
64     256    
-496   -192   
464    464    
16     592    
224    320    
160    -560   
-304   -368   
48     288    
48     112    
240    80     
-128   -80    
-96    -336   
272    -80    
32     64     
-144   16     
176    496    
-112   368    
-16    -112   
-112   224    
384    832    
-192   688    
304    544    
480    912    
-336   144    
48     -48    
-288   64     
-32    816    
1328   -464   
-784   288    
144    240    
64     112    
288    1088   
48     2048   
-224   224    
272    -528   
-272   576    
32     -368   
160    144    
-224   160    
-16    -48    
80     32     
-64    128    
-64    -16    
192    64     
-48    16     
-64    96     
0      -32    
144    112    
16     64     
80     112    
48     208    
96     400    
112    -144   
160    -64    
-240   128    
32     96     
112    -528   
-112   0      
112    320    
-672   0      
240    208    
272    96     
16     -160   
-336   80     
-80    496    
0      256    
400    -144   
-144   128    
-240   208    
208    48     
160    224    
304    224    
-352   336    
-256   272    
48     -16    
-48    -80    
512    176    
432    304    
-944   -16    
416    -80    
-304   -64    
128    384    
48     128    
80     112    
176    -160   
-304   -48    
128    96     
256    -96    
64     288    
-224   -144   
-48    -240   
48     112    
256    -2400  
-144   -560   
-64    -112   
-64    304    
96     80     
0      -32    
160    -80    
-368   -80    
128    -176   
416    256    
112    288    
-240   160    
-144   32     
-176   -720   
2192   -1360  
-1344  -576   
480    304    
-48    208    
-448   240    
640    -848   
608    -32    
-400   1600   
240    -320   
288    -192   
-144   -16    
192    80     
96     -160   
-448   48     
240    -112   
368    416    
80     -304   
-224   416    
160    -1040  
48     144    
-720   -704   
832    -384   
352    -1296  
-688   720    
560    1152   
-192   608    
144    -304   
-560   -304   
288    -48    
160    336    
480    448    
-144   -272   
48     80     
-96    -1472  
160    272    
704    80     
-608   32     
240    -304   
16     96     
48     48     
80     176    
-336   224    
416    -384   
880    1584   
1728   1360   
-864   -384   
-320   -656   
1088   -448   
-320   -608   
144    80     
192    -64    
-128   -144   
144    464    
-304   192    
-416   -528   
816    -304   
-48    128    
-656   208    
432    -256   
704    -368   
-160   192    
-96    -16    
32     160    
240    -192   
272    352    
-848   240    
128    48     
208    48     
-80    -672   
-512   -464   
768    2016   
368    64     
-1120  -400   
192    -32    
432    -800   
-208   -400   
-768   -880   
-128   -64    
-16    -288   
448    320    
-256   -96    
-192   240    
96     -160   
16     176    
352    32     
-48    208    
-64    96     
336    16     
-592   384    
624    656    
-320   560    
32     0      
560    16     
-128   -144   
-288   64     
320    -96    
-32    -64    
32     32     
336    -64    
-496   48     
160    32     
480    -288   
-624   -336   
416    -144   
112    -176   
112    -224   
-400   -256   
256    -16    
-80    -64    
112    -1552  
-64    -32    
368    -432   
-256   160    
176    48     
64     48     
-496   -288   
80     -448   
-128   96     
256    -112   
-64    0      
-48    -336   
-336   -672   
176    -112   
144    352    
-16    -128   
240    112    
240    -304   
-48    144    
16     -144   
-304   -96    
352    0      
-176   -96    
32     -32    
240    -240   
-160   -32    
32     -240   
48     -80    
80     -256   
-48    336    
400    -32    
-384   224    
96     -16    
16     -32    
64     -224   
32     -96    
16     160    
96     -528   
0      -32    
112    -16    
-96    -224   
768    1488   
-1056  -1744  
-864   -160   
1728   -400   
-352   -544   
-688   256    
176    -160   
320    112    
-32    -880   
-224   320    
-208   224    
-96    -400   
-384   112    
96     80     
-272   -80    
256    176    
-144   64     
96     -784   
-32    96     
0      96     
-320   -384   
640    -992   
-176   256    
304    -128   
-240   -32    
-480   -176   
608    -656   
-80    400    
112    16     
-272   48     
-112   -240   
-64    -96    
336    -320   
-96    256    
0      -800   
-304   192    
448    80     
384    192    
-448   -48    
-48    -240   
144    -64    
144    96     
-32    -16    
240    16     
-1440  32     
32     -384   
-224   160    
400    -400   
-192   160    
80     -528   
-1344  -912   
736    576    
144    -336   
-1312  -96    
864    576    
864    -144   
-848   -80    
-304   -1120  
-32    -448   
-192   -208   
80     -32    
256    112    
96     32     
-160   112    
352    -256   
-416   144    
320    -64    
16     272    
-16    -400   
-368   -160   
336    -16    
-368   -928   
-64    384    
544    -608   
-464   -160   
-32    -16    
320    -352   
-256   0      
-144   96     
160    -352   
224    48     
112    112    
-192   0      
-288   128    
240    -416   
-192   -48    
336    -96    
-384   -64    
208    -32    
-240   368    
128    -128   
-128   -64    
-1264  -240   
704    32     
112    560    
-960   48     
-320   -192   
-16    48     
-64    48     
-752   -144   
96     128    
848    1328   
-1040  96     
-128   -240   
752    0      
-1472  -256   
112    -192   
-208   176    
-32    176    
352    128    
-64    -176   
-304   80     
-304   16     
16     0      
80     -48    
-272   -416   
-1376  -80    
144    144    
-192   -96    
-160   800    
1792   2224   
-720   1712   
416    -48    
448    -224   
-48    -544   
-1312  544    
208    848    
752    48     
208    -256   
-240   -272   
-64    112    
-288   64     
320    80     
-80    -464   
-160   448    
-240   448    
-32    80     
32     -128   
-112   -128   
-64    -208   
48     -128   
32     64     
80     256    
-400   736    
-320   464    
112    80     
224    -32    
-16    -192   
-288   -992   
-80    -496   
-368   32     
224    144    
224    -288   
-192   240    
-80    800    
32     320    
288    304    
128    848    
-112   -160   
-176   -656   
320    336    
48     288    
-48    64     
-448   -144   
192    192    
-160   496    
144    256    
352    -1152  
-272   -272   
-48    -208   
144    240    
448    832    
-944   320    
-288   256    
832    -320   
-224   224    
-160   -112   
240    1168   
-240   464    
144    -912   
176    -400   
-224   304    
-112   0      
-112   -272   
144    144    
96     128    
-240   160    
-16    704    
176    240    
96     -48    
-176   192    
-256   32     
-112   80     
112    -32    
-64    144    
-512   -384   
-176   -80    
-48    -256   
64     160    
176    80     
-160   0      
-320   -32    
640    -640   
80     272    
320    -176   
-432   -112   
-96    64     
-112   -64    
800    -688   
208    -80    
-288   256    
-80    16     
-16    64     
96     128    
-48    208    
-80    112    
128    -16    
-176   320    
96     304    
112    80     
-32    -32    
240    -320   
-1072  64     
400    160    
-16    272    
304    -96    
-256   -192   
-64    -80    
272    272    
-48    16     
64     96     
-32    288    
-208   48     
-80    -32    
48     -288   
208    -128   
256    128    
-336   -224   
-64    -480   
304    512    
432    512    
-80    256    
-480   -64    
0      -160   
416    -96    
96     240    
-320   224    
32     -32    
-16    64     
-176   320    
432    208    
-960   1920   
2288   800    
-640   0      
-416   -592   
768    -160   
-272   -496   
-688   -960   
560    -144   
-64    32     
-272   384    
160    144    
-80    160    
0      256    
-48    256    
160    240    
-48    32     
-352   16     
288    -144   
-192   -112   
80     -32    
112    800    
64     -976   
-1200  608    
1056   864    
160    1200   
176    672    
-192   -224   
144    -112   
80     64     
-192   -368   
-256   -32    
304    336    
-112   -112   
-128   128    
-16    16     
256    -32    
-48    256    
-224   64     
288    -16    
112    48     
-208   112    
-80    -32    
320    544    
672    -224   
-560   80     
-208   -864   
224    -128   
-112   -384   
96     -752   
320    32     
-80    352    
192    464    
-160   336    
16     -16    
208    -112   
-464   -48    
-192   -288   
0      480    
192    64     
128    112    
16     0      
-192   -144   
80     256    
240    256    
-144   48     
304    48     
48     -80    
288    224    
544    112    
-752   -1760  
-1440  -2592  
160    -64    
64     176    
-672   -64    
384    160    
656    -144   
-736   512    
112    32     
-128   -944   
64     -368   
64     256    
-176   144    
-224   80     
80     112    
64     16     
-256   192    
-16    -16    
32     128    
-112   -336   
-352   144    
256    80     
-432   -112   
736    304    
768    -432   
-864   80     
-320   176    
736    176    
256    0      
-400   64     
160    176    
144    -32    
96     -80    
-176   96     
-192   80     
224    336    
496    288    
-176   -48    
-144   352    
48     -336   
-96    224    
304    -1696  
-480   64     
144    96     
272    80     
-208   -112   
-336   -16    
208    80     
336    128    
16     32     
-64    -32    
-128   80     
208    496    
-608   -16    
-96    -320   
-560   176    
576    -464   
-288   208    
-352   -176   
256    240    
400    80     
-192   112    
-80    96     
144    144    
0      128    
-16    -208   
16     48     
32     576    
64     272    
-272   -464   
128    0      
176    -1024  
-48    176    
112    0      
240    368    
-160   320    
-96    -352   
400    80     
112    464    
-240   -384   
64     -496   
-464   -1152  
1392   -528   
-608   320    
-80    -480   
48     208    
-400   -320   
496    -208   
64     176    
192    -208   
-288   320    
144    288    
416    -160   
-32    144    
-224   160    
272    -128   
272    272    
-192   -400   
96     336    
-112   0      
48     -112   
288    -32    
-432   -1184  
304    -976   
208    240    
-448   336    
704    144    
-160   -64    
-128   272    
-128   -912   
544    -256   
-80    240    
48     -368   
0      -32    
-160   96     
416    0      
32     64     
-48    224    
96     -176   
96     -2240  
96     -64    
-96    -416   
-32    144    
-112   -320   
96     -592   
352    -208   
-592   -608   
448    144    
80     -304   
-160   -112   
-80    -208   
864    1120   
272    -880   
-1392  640    
1376   -80    
-976   -480   
32     192    
816    -288   
-640   352    
-144   -112   
-96    -48    
208    -304   
-96    80     
-144   -1360  
144    16     
-304   256    
320    64     
128    16     
-352   -240   
336    -16    
-112   64     
-112   0      
384    432    
-256   -1008  
-1312  208    
592    288    
400    -416   
-32    -240   
-368   -96    
416    -32    
-272   -192   
64     96     
-176   16     
0      64     
224    -208   
-112   -16    
-352   0      
208    16     
128    -16    
-80    -96    
-384   96     
-240   -64    
-48    64     
192    -96    
-448   -176   
-224   -192   
432    128    
-208   336    
-160   320    
896    -16    
96     16     
-736   -288   
416    -192   
-240   80     
112    -448   
-384   320    
832    -400   
-704   544    
272    -160   
32     32     
304    -416   
-144   160    
-192   -1328  
-16    208    
336    96     
48     -224   
-496   -416   
480    -1232  
-128   0      
848    0      
-384   -208   
-416   -112   
-848   -672   
-784   -496   
528    48     
-336   -80    
496    160    
0      -352   
-528   208    
80     -1440  
544    176    
-160   -112   
-272   352    
-304   128    
160    -336   
160    464    
-240   -576   
-352   -848   
240    576    
256    -336   
-160   -112   
-48    -208   
-48    -352   
208    368    
96     -128   
160    -336   
-144   -656   
-96    -208   
48     -96    
48     -112   
96     -48    
-192   -448   
-176   288    
80     -256   
0      144    
176    -64    
16     192    
-80    48     
224    -96    
-800   -1136  
208    0      
80     336    
-32    288    
-416   -432   
-112   80     
-80    -144   
96     -384   
0      -176   
16     32     
-48    208    
-16    128    
48     -368   
-912   -128   
-496   704    
1024   -144   
-96    160    
48     480    
208    1472   
96     0      
-48    1136   
-48    -528   
-208   -640   
0      528    
-960   288    
272    -16    
-992   -240   
-448   432    
64     -48    
96     288    
272    -352   
-448   96     
-112   288    
-160   -16    
0      48     
48     -128   
176    64     
48     -96    
-224   -416   
-624   -608   
-48    -208   
80     -304   
336    -48    
-240   144    
-528   1104   
912    -224   
-800   96     
-48    416    
-240   -320   
-240   -288   
-672   240    
80     96     
-224   -608   
-352   -224   
96     -240   
256    128    
-208   -128   
-48    64     
-112   -48    
-48    -208   
288    -160   
-16    -112   
-256   -80    
-288   -160   
608    -1168  
16     -16    
-48    -128   
-400   -576   
-32    -32    
272    -608   
320    192    
-336   272    
-288   416    
64     -192   
240    -96    
96     256    
-128   528    
-16    -320   
-32    64     
224    -16    
-240   -32    
-304   400    
-608   -64    
272    -80    
-48    80     
-112   32     
-64    -272   
80     -64    
240    160    
-336   128    
-16    16     
0      48     
-64    -80    
1072   352    
-2608  224    
528    -592   
352    -80    
-1376  240    
1344   144    
-544   -496   
-416   -240   
144    -240   
144    320    
-64    32     
-192   32     
272    0      
160    288    
-832   -16    
336    256    
48     112    
-192   -400   
-128   -176   
-64    -240   
80     192    
416    112    
-1728  1040   
832    -80    
-224   112    
-272   -192   
448    144    
-224   288    
-160   48     
16     144    
304    96     
48     -64    
-432   -16    
-32    144    
112    -160   
-96    160    
-448   0      
-528   -48    
96     224    
-368   256    
96     80     
480    -16    
96     720    
-1408  320    
-80    -272   
464    400    
-320   192    
-256   144    
-752   -544   
-48    -240   
96     -160   
-208   -288   
-80    64     
-272   -64    
384    -48    
240    224    
-304   336    
-176   240    
176    640    
-320   288    
80     0      
448    48     
-592   112    
-32    208    
576    -160   
416    144    
-880   400    
-304   -528   
144    240    
-464   -640   
2176   2624   
-1312  1344   
96     -1536  
256    -352   
-832   -32    
224    288    
-64    464    
128    -320   
-416   32     
0      -272   
-32    144    
-176   112    
48     144    
-144   -64    
240    48     
-384   64     
80     176    
-160   0      
-112   128    
176    976    
576    528    
-848   544    
288    -144   
-112   128    
-336   160    
960    176    
-480   32     
-304   128    
528    -96    
-80    -32    
-96    0      
-112   112    
256    0      
-416   112    
544    16     
-784   -16    
448    -64    
32     160    
-144   96     
-336   48     
416    240    
-64    32     
-192   144    
-16    208    
96     112    
-144   128    
624    416    
-800   192    
176    192    
144    16     
-96    112    
160    144    
-112   608    
1136   160    
-656   160    
432    -48    
128    16     
-256   144    
240    64     
-80    192    
-16    -64    
-160   16     
128    128    
-144   -80    
128    0      
192    224    
-80    144    
-272   112    
448    192    
-32    336    
-384   208    
128    32     
176    48     
-176   160    
96     -16    
96     -128   
256    112    
-208   256    
0      -352   
80     -640   
64     -32    
-944   -992   
1360   -1072  
-688   -560   
-480   -32    
1152   352    
-496   16     
-208   160    
-160   -80    
560    -208   
96     512    
-304   128    
0      -112   
-64    240    
400    -32    
-272   176    
80     -128   
-64    -64    
32     -80    
128    176    
128    -528   
96     624    
-720   -464   
-96    752    
1008   592    
-208   -320   
-176   176    
-112   -96    
208    -608   
256    32     
-128   -176   
-176   272    
-160   240    
336    0      
176    160    
-352   -1120  
128    -160   
-96    384    
128    -16    
32     144    
208    224    
-160   160    
-528   272    
464    -48    
0      112    
160    -256   
-224   -48    
48     144    
160    96     
-64    -64    
-144   -768   
-1088  1664   
2752   -176   
-864   368    
-240   -416   
656    -32    
-320   336    
384    80     
160    -272   
-304   -96    
240    208    
112    -144   
64     144    
-208   -224   
-16    64     
208    -112   
0      96     
-144   -656   
400    -272   
48     -1152  
-144   32     
-208   -576   
1360   192    
-1568  16     
496    784    
800    64     
-944   -464   
848    -16    
-128   -48    
0      272    
0      -240   
-160   176    
288    -336   
64     368    
-240   80     
96     -192   
-192   -144   
224    256    
208    384    
-368   400    
-144   -80    
128    128    
144    -32    
80     -16    
848    -80    
80     -1104  
-624   -832   
288    144    
-464   -208   
-208   -480   
464    160    
96     192    
-144   -240   
-224   -128   
64     176    
-448   128    
336    -1168  
496    -272   
-288   96     
112    256    
288    384    
192    176    
-80    176    
-32    -304   
-80    -480   
176    128    
-240   -144   
-48    -2496  
544    -176   
-112   -192   
112    -544   
576    1168   
144    -1456  
384    -368   
320    -576   
144    -576   
-160   816    
112    1680   
176    928    
144    -784   
-160   -320   
-32    -288   
-96    -48    
352    -768   
16     48     
-400   -320   
-64    544    
288    -800   
400    -48    
-16    416    
80     784    
-224   48     
240    -656   
224    384    
272    208    
-752   -320   
48     -80    
448    176    
16     -208   
-992   -2224  
144    -480   
80     176    
48     -160   
-368   -544   
0      -832   
112    -320   
224    -1952  
336    -320   
112    -304   
-352   384    
160    128    
80     352    
-160   -288   
-144   -400   
-528   192    
272    336    
-32    160    
608    -256   
-288   608    
320    416    
-16    80     
144    -416   
-240   96     
880    -384   
96     672    
80     368    
208    320    
-128   96     
0      960    
688    1920   
-80    -96    
-160   -688   
112    -224   
64     -320   
-240   -80    
144    128    
336    -1088  
224    -176   
-208   -2208  
-96    448    
32     -64    
0      -128   
256    -80    
-144   176    
-464   288    
16     -432   
-288   -1008  
480    -976   
368    976    
-192   496    
-272   64     
-192   -768   
800    -560   
752    -1808  
-432   -80    
-272   736    
1056   944    
-336   -288   
48     -176   
-128   272    
32     -592   
112    112    
48     96     
-464   128    
-32    -48    
416    -64    
480    -224   
-384   512    
64     -256   
160    -32    
208    -64    
-160   -160   
272    192    
-336   288    
48     -1024  
272    -224   
0      240    
16     -304   
-176   -384   
336    -144   
-176   160    
32     -96    
272    160    
64     -496   
-288   432    
224    -256   
-256   -288   
0      -32    
96     -352   
16     -256   
-208   64     
80     0      
112    -256   
-544   -64    
160    -336   
112    288    
352    -176   
-368   160    
112    -416   
48     16     
256    32     
1120   768    
-1760  928    
320    560    
944    -288   
-912   -240   
-736   32     
912    -336   
-176   48     
-80    64     
448    128    
-784   -240   
-176   128    
-192   -288   
-784   0      
224    80     
-576   224    
48     -48    
-1680  128    
448    -16    
-96    0      
-112   0      
112    0      
1072   -464   
-1328  32     
800    -352   
-80    -16    
336    288    
-304   32     
-80    -208   
272    -112   
-416   -240   
-176   80     
-320   -32    
-80    48     
208    96     
80     16     
-720   32     
208    -128   
-304   176    
80     0      
-224   -496   
368    176    
-448   -688   
-720   64     
1344   496    
608    112    
-1120  16     
-560   240    
288    624    
-304   32     
368    -256   
176    -272   
-304   -64    
-288   -240   
16     -304   
16     -576   
288    -272   
-336   -16    
-160   -48    
480    -96    
464    160    
-656   -16    
-464   240    
992    128    
80     -64    
288    832    
-1216  304    
-192   -480   
720    128    
-336   0      
80     4336   
736    1232   
-112   -784   
144    -512   
-1024  -80    
80     240    
96     480    
752    -336   
-256   160    
-640   -448   
-320   240    
368    80     
-176   128    
32     -256   
-256   128    
64     -32    
-512   64     
608    96     
-400   64     
-336   48     
784    384    
-800   112    
224    128    
-240   -64    
-304   112    
704    112    
-752   128    
0      64     
96     32     
352    48     
-272   304    
368    128    
-320   144    
272    -144   
96     128    
-384   -32    
-80    256    
464    96     
-480   128    
0      192    
176    112    
-480   -160   
224    64     
-1344  0      
160    48     
16     192    
-80    32     
16     16     
240    512    
-592   592    
256    320    
112    80     
-32    480    
496    0      
-608   16     
624    128    
-448   -112   
0      208    
192    0      
-96    -368   
-400   -224   
0      0      
128    144    
0      320    
16     176    
144    96     
48     128    
-32    -208   
-208   -208   
96     -432   
-96    0      
16     -32    
128    352    
-288   320    
48     160    
224    496    
224    96     
-352   -112   
0      -448   
160    -80    
0      -112   
576    688    
-2384  1504   
1488   -48    
32     -432   
-208   -544   
-336   -272   
-400   -544   
160    -240   
160    -352   
64     16     
-304   -16    
-240   64     
240    336    
224    176    
-496   352    
-224   -608   
400    -912   
240    -464   
-16    -512   
-64    96     
-416   -368   
656    -672   
-640   224    
240    -560   
-96    240    
320    144    
-96    128    
16     704    
32     -704   
-176   416    
176    -128   
-48    160    
240    -16    
-192   192    
80     -256   
-160   288    
80     96     
-48    0      
-128   656    
0      -624   
128    -48    
176    96     
-64    112    
144    192    
-16    -48    
272    336    
-64    -160   
-128   -96    
-144   224    
-96    16     
1344   1088   
-1328  672    
-1168  -720   
2144   -848   
-976   -688   
-768   -16    
976    704    
192    1600   
-496   272    
384    -1008  
-112   288    
-304   0      
256    288    
112    -80    
-464   192    
80     192    
128    16     
-48    176    
128    48     
0      0      
-48    192    
-736   432    
2640   -48    
-1328  320    
-688   352    
1328   1664   
-224   1600   
-448   1184   
160    304    
96     -400   
-144   -176   
480    176    
-16    160    
16     224    
-64    512    
272    368    
144    -128   
-64    624    
688    1552   
-528   1200   
80     -48    
368    -528   
80     -400   
-352   80     
592    -1088  
-720   -512   
160    -1392  
992    288    
-432   -48    
128    592    
-176   112    
0      176    
-480   -128   
96     48     
464    128    
-512   64     
608    240    
128    608    
48     896    
784    -320   
-384   -304   
176    -496   
96     -48    
416    272    
176    -96    
-96    16     
-96    128    
-48    -544   
208    -672   
-176   32     
-240   400    
416    1744   
1600   544    
-1968  -208   
-608   -384   
1216   608    
144    -16    
-368   304    
-208   -144   
-112   528    
128    -352   
240    464    
-64    -464   
-112   96     
-16    -176   
672    -160   
-80    432    
-176   192    
432    32     
-16    -752   
-48    -240   
96     -272   
224    208    
-784   -768   
384    416    
400    144    
-768   -112   
320    -1264  
-704   -1408  
272    -400   
-320   368    
176    368    
320    240    
-64    112    
-80    -464   
-128   -288   
208    -272   
-112   528    
224    -256   
-256   -288   
112    -528   
528    -448   
-320   -656   
128    320    
128    720    
160    -560   
128    -16    
-64    240    
-64    -480   
-32    -128   
384    624    
448    832    
-896   736    
224    -960   
976    1568   
-320   752    
-256   416    
352    1088   
64     944    
192    816    
320    224    
240    112    
-144   -1136  
-80    -128   
352    -736   
64     -96    
-112   -208   
32     160    
64     16     
0      -176   
240    -656   
-96    -336   
64     -128   
-224   -272   
112    32     
224    208    
-128   800    
-96    128    
16     -144   
112    -640   
48     -16    
-272   -2352  
-928   544    
912    80     
-208   -48    
304    320    
32     1040   
112    656    
0      -304   
368    -96    
16     -224   
80     -624   
0      -144   
96     -1184  
96     576    
-16    160    
128    -512   
128    464    
-32    80     
32     -144   
0      -48    
512    -1104  
-736   688    
608    16     
-576   -256   
-16    -48    
352    -592   
-224   -16    
64     -352   
-240   80     
688    -928   
-368   -224   
32     80     
-64    176    
320    -496   
-64    32     
16     -144   
-96    32     
80     192    
256    -128   
-976   64     
-48    -192   
-240   80     
288    -96    
-320   144    
448    -512   
0      112    
-16    -2176  
-128   160    
176    -16    
-416   -608   
1136   1760   
1840   -64    
-1968  -48    
480    -416   
544    -16    
-80    64     
-96    592    
-16    -128   
128    -32    
-256   -464   
96     16     
-64    -416   
-16    128    
144    96     
176    80     
-160   48     
0      96     
-176   -32    
128    0      
-112   -16    
-16    16     
16     336    
1664   -48    
-768   880    
-768   -160   
544    -256   
80     -464   
-16    352    
416    -2960  
0      80     
-336   -64    
-112   80     
288    16     
128    112    
-384   0      
288    0      
-32    288    
-128   64     
-1664  -272   
1008   448    
320    16     
-352   96     
-1168  288    
1024   -1136  
-112   -176   
160    -480   
96     16     
16     -320   
304    192    
320    784    
576    176    
-560   368    
-384   192    
240    32     
512    -320   
-480   -240   
-560   -336   
400    320    
416    -272   
704    -224   
-384   64     
128    -144   
-144   176    
0      -112   
-32    -16    
96     -240   
-112   32     
240    -64    
-304   -176   
-960   -2352  
1088   -1088  
640    544    
-1328  400    
880    192    
-464   -288   
-32    -32    
1040   608    
-688   -32    
0      240    
32     16     
-64    32     
80     -96    
-64    -32    
64     -80    
-128   -160   
32     160    
-16    0      
-208   64     
-208   -880   
-240   -352   
-32    0      
-80    16     
496    80     
160    -48    
-464   96     
48     80     
0      16     
0      -208   
-32    -64    
-112   16     
112    128    
-448   112    
-400   -32    
-80    -416   
-272   -400   
-224   -304   
-208   -32    
-48    0      
-1200  -96    
-176   -16    
-80    -32    
48     256    
0      336    
224    464    
-48    -48    
-16    144    
-48    -448   
-80    16     
240    176    
-224   368    
-96    400    
384    656    
112    -320   
-448   -816   
-256   -1376  
-64    -272   
400    576    
-256   432    
128    320    
-48    128    
-288   384    
-144   672    
896    448    
-512   624    
-96    768    
-16    -192   
240    0      
-208   16     
-128   512    
32     80     
-400   -128   
-112   -144   
-48    -160   
240    320    
-64    208    
64     480    
-160   448    
112    -448   
-96    -352   
0      -208   
-16    448    
-224   -1280  
-112   192    
896    368    
-688   592    
-144   -624   
144    192    
-848   -560   
-64    32     
112    160    
-16    464    
48     192    
160    32     
-16    240    
-48    192    
112    304    
288    0      
-112   544    
-48    0      
128    256    
-448   -384   
688    -336   
-560   256    
-80    16     
16     -48    
-144   432    
128    384    
32     912    
0      784    
48     320    
-288   -16    
144    0      
-176   32     
112    -144   
-64    208    
-272   -48    
-64    96     
352    -48    
16     16     
-224   -64    
-288   -80    
128    128    
-80    256    
-16    48     
-128   -112   
208    -288   
16     48     
-16    272    
-144   96     
-176   80     
1632   704    
-2032  720    
-768   -224   
1872   480    
-2224  272    
-112   -48    
384    32     
-272   960    
-32    80     
272    -992   
48     -304   
-80    560    
192    0      
0      80     
-96    64     
-96    320    
160    192    
-96    -16    
144    384    
16     -272   
-496   -368   
1424   832    
-112   -224   
-416   -208   
-192   -656   
-432   -160   
448    -400   
-48    1152   
368    2144   
-160   1312   
128    -256   
96     -176   
-336   -336   
304    -592   
-448   -704   
144    -16    
416    -48    
-704   -1280  
-208   -1200  
96     -960   
48     192    
-80    -48    
176    352    
-96    464    
32     352    
-672   16     
720    240    
688    -416   
-576   64     
320    -368   
160    192    
-144   48     
16     32     
128    -128   
352    -64    
-144   1232   
-144   336    
-256   -80    
192    -640   
192    -272   
48     -208   
144    112    
-304   -16    
176    -512   
-256   -176   
384    368    
288    128    
288    816    
-288   752    
-208   384    
1504   1872   
-1744  496    
16     688    
1248   -304   
-560   -224   
-768   -704   
144    208    
368    32     
64     272    
-208   208    
0      848    
-48    -576   
48     -640   
32     208    
-112   304    
-32    256    
304    -48    
464    128    
-368   64     
-304   0      
32     -320   
208    -304   
-96    464    
1040   1424   
-608   624    
-160   896    
848    112    
-272   272    
-64    736    
-160   416    
592    448    
-320   -256   
-16    240    
368    64     
144    208    
-80    -16    
-384   -352   
176    240    
80     0      
112    656    
-128   464    
-16    528    
288    -16    
176    480    
0      336    
-240   144    
336    592    
-208   400    
0      224    
80     -160   
-48    -96    
-272   -992   
560    -528   
608    16     
-208   -128   
-672   64     
544    304    
224    880    
-240   672    
-240   176    
128    -208   
-432   -48    
400    176    
432    0      
-256   80     
-320   -48    
400    -304   
-128   368    
-128   -432   
224    -32    
80     112    
-272   96     
432    -272   
0      -64    
-288   224    
224    144    
-272   112    
240    192    
128    -80    
-208   112    
-352   -128   
1472   2272   
1536   144    
-1584  480    
128    64     
-80    112    
352    -144   
-80    144    
-96    -240   
96     -576   
-32    400    
384    -208   
-48    272    
-64    96     
-192   240    
304    -32    
64     512    
368    -224   
-480   -320   
48     144    
224    -1504  
-416   -656   
704    -512   
-96    368    
-864   0      
1008   304    
-208   -544   
64     48     
-192   64     
192    160    
320    192    
-16    -256   
-80    80     
32     -464   
-320   32     
704    -496   
-64    160    
80     -96    
-32    304    
272    -80    
-352   112    
416    112    
64     112    
64     128    
288    192    
-592   80     
128    208    
-48    80     
64     176    
144    48     
864    -304   
-496   480    
208    96     
176    -336   
528    320    
32     16     
-1104  -48    
928    656    
-448   -16    
-48    -192   
320    16     
-272   -400   
112    32     
-176   -16    
592    112    
-368   -352   
192    128    
-160   128    
48     16     
-48    48     
272    16     
112    160    
208    -800   
-768   464    
1328   112    
-1040  112    
144    464    
640    128    
-96    -16    
-464   192    
64     -272   
256    192    
-256   48     
16     160    
112    -32    
144    -2848  
-32    16     
-144   -192   
384    -496   
-144   112    
128    144    
-80    -48    
112    288    
-1072  144    
768    112    
-912   208    
-80    160    
624    -384   
960    -1568  
368    80     
-848   -560   
80     0      
-96    64     
-64    -16    
16     -336   
192    -1024  
-160   96     
16     -832   
192    -256   
-640   496    
256    -96    
-208   -544   
144    48     
64     -272   
-128   64     
-64    -336   
384    -448   
-1248  -16    
208    -160   
-160   -208   
-1184  -1648  
2352   -2912  
400    368    
-704   400    
-784   96     
720    176    
864    -480   
-672   -48    
-432   -48    
256    176    
-256   -32    
368    -32    
-576   -240   
32     -64    
80     -96    
144    -144   
-64    112    
-112   -208   
-208   0      
192    -1600  
-800   -1840  
160    -1104  
-112   96     
304    336    
656    32     
-736   -592   
-128   96     
-448   -64    
288    -96    
-32    32     
-128   96     
-32    320    
0      -192   
48     48     
304    -736   
-448   432    
336    -192   
256    208    
-80    32     
-224   144    
128    48     
16     48     
-64    272    
16     288    
-624   304    
672    576    
-320   608    
-192   256    
416    368    
128    224    
64     832    
-112   -1088  
0      1200   
1280   -560   
-496   -432   
-400   -288   
224    -528   
-48    -400   
192    -688   
-336   -32    
128    1024   
-512   80     
112    -560   
144    -208   
80     -336   
16     -128   
0      -160   
96     48     
208    -320   
96     -16    
-128   -128   
32     -64    
-96    0      
320    -80    
-48    176    
-176   192    
-192   192    
368    544    
-192   1056   
352    -416   
112    128    
48     -608   
-688   656    
672    -144   
-256   96     
-608   80     
32     -48    
-64    -192   
128    -192   
224    -32    
64     80     
-352   112    
176    -160   
48     80     
-208   -224   
-32    128    
256    -320   
224    -192   
-320   80     
-32    128    
-176   -112   
16     32     
400    640    
544    80     
-752   288    
-224   -160   
-176   32     
192    -48    
-96    -320   
-144   -176   
48     -480   
-448   80     
128    -32    
16     -224   
-320   272    
-64    16     
224    128    
-112   -64    
0      208    
-32    -48    
-16    -144   
-240   -144   
112    -192   
80     80     
-416   -112   
512    400    
-432   352    
-304   256    
160    0      
-576   -224   
448    -624   
-512   -976   
2320   -432   
-1792  1424   
464    560    
336    576    
-544   496    
160    240    
400    -400   
-288   864    
-272   1216   
-96    -704   
304    208    
288    112    
-160   336    
-144   304    
64     144    
0      -112   
-576   256    
-160   -272   
128    160    
96     -96    
-624   368    
2064   -144   
-1104  160    
-304   96     
912    -480   
144    -1808  
-896   -1168  
160    -16    
224    -784   
-496   -896   
304    -272   
-272   112    
-352   -80    
-128   0      
128    256    
-448   -48    
336    416    
-464   208    
96     192    
96     -96    
-96    -64    
224    -48    
48     96     
720    1600   
-1424  1600   
-112   96     
-128   -1040  
-112   -544   
176    -432   
240    -576   
-64    32     
272    160    
-560   352    
-16    224    
-224   192    
-144   576    
704    80     
-736   -288   
240    -144   
0      112    
176    80     
-128   32     
-16    -240   
-128   -80    
384    48     
-80    -48    
-336   32     
-192   -128   
624    -992   
640    2144   
-464   1168   
352    -32    
1392   -80    
-1024  80     
-480   1248   
576    128    
-272   -240   
-32    464    
32     -32    
-400   656    
352    -176   
320    32     
-336   32     
-64    432    
-192   -64    
272    224    
-176   -80    
464    880    
-464   928    
0      -336   
432    -560   
-320   32     
176    224    
256    96     
-416   192    
144    -272   
-384   -48    
560    -272   
-288   -464   
80     -240   
192    -192   
16     -96    
32     -224   
-16    64     
-64    160    
368    -16    
-176   -128   
-112   0      
-144   64     
112    -16    
-208   -32    
448    -64    
-96    32     
-192   16     
176    144    
208    16     
48     -64    
-384   16     
112    192    
432    176    
-144   48     
-320   352    
848    48     
-96    -128   
-224   192    
544    -16    
-64    224    
-48    864    
-304   384    
272    80     
16     96     
0      48     
-208   16     
32     96     
64     80     
0      -448   
-304   -176   
112    608    
-48    16     
256    -48    
-128   128    
0      160    
-80    192    
64     -64    
176    112    
32     272    
-192   128    
-48    32     
112    48     
16     64     
-416   1712   
2128   -640   
-1408  240    
48     992    
1200   -32    
-560   288    
-16    -80    
-176   496    
64     32     
96     0      
32     112    
-144   -112   
-96    -16    
64     272    
448    -368   
-464   192    
32     192    
160    112    
-32    64     
-32    112    
352    -800   
-1008  832    
1024   400    
-480   -192   
-320   192    
768    16     
-448   48     
-240   96     
64     192    
400    16     
-480   112    
-16    -32    
192    -1120  
32     16     
192    144    
160    -96    
-416   -96    
208    -128   
-288   304    
384    -16    
-224   240    
304    -32    
-384   96     
320    192    
-256   -128   
-80    256    
416    -16    
-480   -224   
256    112    
1392   1600   
-2080  1600   
-304   768    
1664   112    
-192   -192   
-336   16     
-512   400    
816    256    
-512   -192   
144    0      
80     32     
-48    192    
0      64     
80     -368   
128    48     
-336   32     
320    160    
-112   144    
128    -128   
-96    -32    
-80    16     
-208   -528   
896    240    
-784   224    
480    192    
80     240    
-608   80     
304    128    
64     -720   
-336   80     
320    336    
-256   96     
48     176    
256    64     
-64    64     
-336   208    
368    -48    
0      464    
112    96     
-256   -192   
-176   48     
272    240    
-240   -16    
-64    -144   
304    -32    
-704   -320   
416    -16    
464    512    
160    -96    
-352   64     
192    256    
0      -16    
-160   -16    
80     144    
80     272    
-512   96     
16     -336   
512    -80    
80     -432   
-656   192    
768    -544   
48     176    
-384   -752   
-16    64     
192    224    
256    -48    
-32    -224   
144    96     
96     160    
16     -112   
-896   96     
1616   544    
1344   432    
-2208  -192   
-256   16     
1264   -80    
-80    384    
-176   0      
-128   64     
-176   -112   
432    64     
160    48     
-272   0      
-240   96     
352    32     
560    240    
-208   -192   
-112   240    
-32    -304   
432    112    
-256   -816   
-128   64     
240    -480   
-224   176    
-112   -544   
368    -320   
-272   128    
-48    288    
384    784    
336    32     
-416   -448   
-96    -384   
400    896    
320    -16    
32     -256   
-304   -240   
368    304    
-416   16     
416    752    
-48    -224   
-256   -224   
160    -80    
128    112    
-32    -224   
-496   -448   
432    880    
240    912    
-224   368    
576    -1264  
-560   -112   
112    432    
-208   -208   
720    -560   
-720   0      
464    -1136  
-384   -720   
-336   -336   
320    144    
-176   0      
-16    -48    
208    -416   
-32    112    
-32    -320   
176    -432   
-176   240    
0      -272   
-176   -288   
-128   -80    
-192   -192   
288    48     
-112   -720   
0      32     
64     -80    
-32    -144   
-832   -64    
128    80     
-160   0      
192    16     
-128   -96    
320    -1696  
-160   144    
-400   -176   
864    -464   
16     224    
304    -256   
-352   96     
112    -192   
320    -384   
-32    64     
-272   336    
160    -256   
-80    -112   
112    -288   
272    16     
-80    -16    
48     -64    
256    -432   
448    176    
-128   240    
-304   96     
-16    0      
848    384    
-1200  416    
576    -336   
64     -144   
-144   -480   
64     -48    
-208   -240   
352    -1024  
400    -288   
-64    144    
-144   -704   
-128   -192   
336    -16    
48     368    
-336   32     
64     -160   
144    -800   
288    -240   
-80    -224   
64     80     
-1232  144    
432    112    
-160   240    
32     -64    
-288   -352   
272    -336   
240    320    
80     208    
-592   512    
80     -160   
-1360  720    
2080   -336   
-384   -416   
-304   -1024  
768    304    
784    336    
-352   720    
-128   1696   
-256   320    
160    -1376  
208    -368   
-480   144    
-16    -944   
160    80     
48     -64    
96     0      
-304   112    
-144   -496   
256    -528   
80     -448   
400    1328   
-1168  -784   
-704   624    
1088   464    
-832   560    
-16    -960   
-640   -1520  
544    -1328  
-512   -16    
80     192    
288    -80    
-304   112    
-144   -304   
96     -80    
240    -128   
-720   160    
352    48     
32     448    
320    16     
-96    64     
-128   -64    
16     96     
-240   -176   
-592   -32    
-112   32     
784    -480   
-144   256    
-240   16     
96     32     
160    640    
704    -80    
-416   96     
-128   -32    
368    -368   
416    496    
-352   -320   
-848   384    
1200   -736   
400    -48    
-320   112    
208    256    
-176   -48    
112    96     
560    -352   
-464   448    
192    32     
-48    -176   
160    -64    
432    688    
-1472  -416   
112    -528   
1840   176    
-1216  -80    
-976   112    
288    -64    
1136   -208   
-784   -32    
-384   16     
16     96     
240    208    
-112   32     
-112   -16    
-48    16     
-960   -16    
384    176    
32     -16    
-176   0      
-64    32     
-496   -352   
96     64     
-224   128    
0      -16    
0      128    
-640   -176   
-144   -192   
-320   -176   
240    -160   
-48    64     
-64    176    
64     96     
-256   144    
176    16     
0      288    
32     256    
-400   80     
256    272    
-128   -144   
32     80     
-160   16     
-208   48     
-448   -32    
304    144    
416    0      
-32    32     
240    80     
-384   112    
96     336    
112    512    
144    368    
-96    208    
-400   128    
-16    -928   
-256   -176   
432    624    
-1296  496    
848    128    
-48    -576   
-768   -128   
144    -496   
-208   -96    
384    112    
-96    112    
-112   80     
-80    -256   
-144   -128   
-96    -32    
-144   112    
144    -112   
-48    -256   
-144   48     
48     0      
80     -144   
0      144    
-32    -112   
-64    304    
336    144    
-304   48     
240    96     
-320   32     
0      -32    
1104   1584   
-2608  1264   
528    -96    
736    -208   
-544   -144   
144    -64    
-832   272    
416    -576   
-144   -176   
224    288    
-192   96     
-64    48     
192    0      
-32    80     
-192   -240   
-16    288    
208    -32    
-224   -112   
-48    -192   
48     -32    
-400   -400   
688    64     
-320   240    
-848   -176   
384    0      
-560   288    
320    16     
416    0      
-320   144    
-176   224    
-208   -16    
256    48     
352    -64    
-320   256    
-544   -224   
432    128    
64     -192   
-384   80     
432    -16    
-496   48     
480    16     
-64    80     
-96    16     
-16    96     
240    -128   
-384   48     
128    80     
-112   160    
160    96     
-160   -512   
-176   -336   
-1040  -832   
1296   -64    
-784   176    
-32    224    
640    160    
-432   32     
-240   144    
480    16     
-96    16     
64     96     
-112   32     
48     112    
144    -16    
-480   16     
528    48     
-400   96     
64     -176   
176    -160   
-64    -144   
16     192    
32     -560   
-976   1152   
1008   -192   
-528   -144   
-96    240    
288    -32    
-224   -176   
-416   608    
-176   -80    
368    64     
64     176    
-80    -16    
-112   240    
0      160    
32     -80    
-96    176    
48     224    
512    -192   
-192   320    
-208   16     
240    -240   
784    -288   
-896   848    
96     -304   
464    128    
-624   240    
-64    -48    
416    -32    
224    80     
-224   64     
-80    192    
224    16     
32     48     
-80    112    
240    240    
928    304    
-912   208    
240    416    
-320   -336   
-272   128    
288    160    
-160   80     
240    224    
48     48     
208    560    
-608   336    
-192   80     
640    496    
-208   112    
-288   192    
656    -448   
352    -80    
1376   96     
-624   -288   
-816   -2480  
1312   240    
-800   160    
32     -480   
-32    -272   
272    256    
-144   112    
-112   -208   
288    224    
80     208    
-64    -160   
-192   608    
-240   -96    
-32    496    
496    336    
-176   384    
16     496    
96     80     
-384   624    
-16    176    
-80    -688   
-64    -960   
352    -272   
32     32     
-32    528    
112    336    
-48    -144   
352    -224   
80     112    
-208   80     
-256   -400   
320    -512   
-80    -480   
-32    464    
64     496    
-112   192    
320    112    
208    -112   
-16    688    
304    1376   
-192   720    
368    64     
48     384    
80     576    
112    -192   
144    416    
528    -96    
-816   -160   
656    -160   
64     368    
-128   176    
-240   448    
240    1248   
128    -208   
-208   -560   
160    -160   
-144   432    
112    -208   
-48    -112   
272    48     
-272   -544   
256    16     
-96    -384   
-416   80     
176    96     
-288   112    
400    48     
-112   160    
-48    32     
-16    80     
208    32     
-32    176    
432    -80    
-688   -272   
-112   400    
560    -48    
144    576    
-288   -176   
256    -64    
272    -688   
-80    -192   
-32    240    
288    336    
-272   96     
416    -16    
-16    -96    
-224   160    
-64    96     
272    -208   
16     64     
-192   0      
32     -112   
-16    -736   
160    -96    
16     -592   
-16    304    
0      -512   
0      -144   
-96    400    
-96    352    
96     112    
240    -464   
304    144    
-384   896    
32     352    
448    -112   
-80    288    
-512   -112   
272    112    
-112   -80    
80     -192   
304    112    
256    432    
-560   128    
-96    -480   
160    128    
96     752    
-80    -640   
-544   -560   
352    640    
320    -16    
0      272    
-336   96     
112    -128   
-96    -160   
176    496    
-912   1408   
3216   -592   
-832   336    
-1536  -1136  
944    -224   
-336   -32    
-32    -1216  
432    -704   
-112   -64    
-480   -32    
192    -48    
112    -336   
-48    -32    
272    -48    
-160   32     
-48    16     
80     96     
112    448    
224    32     
32     -400   
352    1120   
-512   -1328  
-1232  -48    
1584   -224   
-624   64     
-224   -32    
896    -560   
-432   256    
208    -32    
80     -112   
-176   160    
-96    -144   
16     -48    
432    176    
240    -272   
-592   16     
112    -304   
544    128    
48     -576   
-48    -48    
-80    -1952  
-480   -576   
-80    208    
288    352    
-144   -448   
64     -400   
320    -80    
-32    -16    
-624   64     
288    96     
-176   144    
-16    -144   
-48    -224   
-528   -32    
320    -448   
32     -304   
80     160    
320    -1584  
-96    400    
-144   -48    
-448   -32    
48     -96    
288    96     
-160   0      
-352   -352   
784    -432   
-304   -224   
-32    16     
448    -912   
-112   160    
1616   1456   
1104   -224   
-1920  -832   
-400   96     
1168   -384   
352    192    
-352   -176   
-240   208    
-112   -112   
256    48     
240    -48    
-176   80     
-80    -144   
304    144    
0      -32    
32     -176   
128    -48    
-96    -416   
-144   -400   
-784   -128   
880    -192   
-576   208    
880    -208   
64     112    
-336   -176   
-496   192    
1152   176    
-1024  -48    
256    192    
-112   -96    
-32    -32    
80     -80    
48     -208   
96     -336   
-656   -720   
464    -144   
144    192    
-208   0      
-416   16     
144    128    
-96    16     
336    96     
-752   144    
256    144    
-656   32     
-32    -160   
160    -144   
-80    -272   
-112   -16    
416    -272   
-48    48     
-448   -368   
272    -112   
-16    -48    
-48    -144   
64     96     
-96    -432   
-48    -416   
-64    -160   
128    -128   
-80    0      
-48    192    
96     -336   
32     -96    
96     -576   
-176   608    
-208   32     
176    176    
352    912    
320    -48    
-720   -128   
80     160    
16     128    
224    -160   
-176   -32    
-16    -368   
-384   320    
352    -464   
256    -352   
-208   -144   
528    1312   
-2512  1024   
640    -80    
608    -80    
-128   -192   
-208   64     
-256   -48    
496    -208   
16     112    
-16    -96    
-1488  -80    
-128   240    
272    -80    
144    336    
-512   -496   
-80    -64    
128    352    
-720   -192   
128    -592   
-480   -48    
-224   -464   
608    -912   
-688   336    
-240   -144   
224    160    
-320   176    
0      96     
288    -96    
-64    -464   
-336   112    
-256   32     
240    304    
48     -48    
-144   -80    
-176   -48    
-16    -80    
80     -160   
352    -208   
-448   -16    
-48    64     
-48    64     
80     160    
32     -176   
-144   48     
-160   -48    
240    112    
-64    96     
-224   96     
160    64     
368    64     
-1536  1296   
1200   560    
-240   496    
-720   -176   
1536   416    
-768   -128   
-704   -32    
720    -240   
-64    -80    
-176   160    
-160   64     
112    -208   
-272   -112   
0      -176   
16     80     
-160   128    
64     -80    
464    192    
-848   -192   
-208   96     
272    -80    
-480   240    
2032   -432   
-1360  -240   
-608   -192   
912    112    
-560   -112   
480    -224   
-208   160    
-48    208    
480    208    
-160   -176   
32     96     
-608   -96    
-176   144    
-144   16     
368    48     
-208   384    
288    64     
80     256    
-96    32     
-64    -48    
464    -416   
-288   672    
416    -288   
-592   16     
544    1136   
960    -32    
-720   -464   
160    288    
112    0      
96     0      
144    -144   
-48    416    
-544   160    
-368   64     
1008   240    
-800   752    
-224   -32    
160    -400   
288    16     
-48    -48    
-384   -16    
160    32     
416    624    
-672   192    
-960   256    
480    -144   
320    -256   
-160   64     
944    2128   
-128   608    
-1056  -560   
1904   -224   
-224   -208   
-1424  -768   
-112   -1456  
1072   -592   
-464   128    
-336   -384   
-176   352    
576    400    
352    176    
-80    -128   
-208   256    
208    592    
-96    176    
-16    -352   
160    -208   
-80    -112   
-176   -176   
-112   0      
256    320    
-32    64     
-528   -144   
352    -624   
128    -16    
32     1280   
144    160    
32     -112   
144    336    
-160   272    
-96    96     
176    96     
-144   432    
-16    256    
-32    -272   
144    544    
-16    480    
96     32     
64     -256   
-480   144    
208    192    
80     -64    
288    304    
-192   320    
-272   -160   
208    -224   
224    240    
-48    304    
-160   208    
-656   -112   
1136   -624   
-272   -96    
32     960    
112    816    
192    256    
-192   608    
-304   -192   
384    -32    
272    -48    
-192   -16    
0      112    
64     208    
-48    128    
240    496    
192    112    
96     -720   
272    -64    
128    656    
-192   -192   
16     48     
304    32     
-224   320    
-32    -32    
-192   -496   
-80    -560   
624    -1200  
704    -336   
-672   320    
-96    160    
32     960    
464    416    
-96    -544   
-432   -480   
48     -352   
128    336    
64     368    
256    96     
-16    -224   
-288   -256   
224    -48    
208    -144   
-16    -176   
-112   -176   
-16    128    
-32    -224   
320    -2464  
128    16     
-272   96     
-256   -144   
640    64     
96     -16    
-272   256    
208    1824   
160    688    
-16    -96    
176    -512   
-208   400    
0      208    
240    -64    
368    -48    
-128   -16    
-96    128    
176    208    
-80    176    
192    -16    
-192   160    
-16    -144   
128    192    
192    208    
-208   304    
-208   384    
336    -48    
-144   304    
336    -48    
-304   192    
432    -224   
-192   112    
-464   -880   
752    -1072  
1408   432    
-1936  480    
-400   208    
1616   240    
-1200  224    
-320   400    
592    -192   
-272   -144   
-80    -112   
-128   112    
640    176    
-80    -48    
-80    -80    
-368   -1344  
464    48     
-96    112    
144    208    
128    80     
32     208    
-16    -224   
208    -400   
-1248  1024   
1424   160    
-976   -112   
720    -96    
64     80     
-368   16     
144    400    
-336   208    
272    16     
176    -128   
-304   16     
160    0      
-16    -208   
496    336    
-32    -16    
-368   -368   
192    -528   
-32    -208   
224    -208   
16     -64    
144    96     
-48    144    
256    -96    
-32    352    
48     -848   
-32    624    
-656   -176   
288    128    
640    -96    
-48    -144   
-640   -16    
368    256    
288    128    
-48    -272   
480    -528   
-288   -368   
112    320    
272    -240   
640    288    
144    0      
-640   224    
-64    -48    
576    112    
32     -448   
-624   192    
336    128    
-592   -64    
672    1136   
928    -2176  
-3200  -1408  
1680   -560   
1264   352    
-1056  -16    
-256   160    
-192   -240   
720    80     
16     -144   
32     256    
80     48     
272    32     
-352   -48    
144    112    
-240   -48    
224    -352   
208    112    
-352   -304   
-384   -224   
1120   -288   
-160   -176   
-128   -128   
0      256    
-672   -16    
288    128    
624    128    
-464   -384   
256    -896   
-448   -176   
416    -816   
-144   -112   
48     96     
112    -144   
-112   224    
-32    -16    
-256   128    
272    32     
-48    -2864  
0      48     
384    176    
-240   160    
64     -688   
80     -128   
16     -192   
-32    -432   
208    128    
-448   -64    
192    -48    
320    -2304  
-256   0      
144    160    
-288   -448   
640    -224   
-80    304    
256    -320   
-1104  256    
-32    -304   
96     -464   
96     -16    
-192   -224   
-240   -176   
320    -464   
160    -144   
16     -752   
-240   80     
176    96     
160    -160   
-272   0      
160    -720   
-224   -400   
128    288    
-128   -48    
288    -192   
-256   -240   
-64    224    
-176   -336   
48     -368   
256    64     
-96    496    
-64    -96    
-48    176    
976    2480   
352    208    
-1216  528    
-48    -384   
160    -192   
464    240    
-224   480    
144    -416   
-368   -528   
-208   0      
96     208    
-64    -176   
-48    -32    
-64    -560   
304    -784   
-112   352    
-16    96     
-160   384    
64     -160   
176    -128   
496    384    
-1184  656    
832    16     
-624   -208   
0      -64    
416    192    
-240   -464   
-48    -208   
80     208    
192    -736   
-272   -224   
432    -368   
-192   224    
320    144    
-64    -80    
-448   304    
160    48     
96     -272   
32     -288   
-128   -176   
-208   32     
-816   -112   
272    -64    
-32    -96    
-80    -256   
144    256    
144    -96    
16     80     
-240   -96    
-400   -512   
448    -48    
544    -912   
-480   0      
512    240    
-752   256    
-112   -176   
128    0      
464    -352   
-144   64     
-192   -272   
192    256    
64     -560   
-384   -768   
416    -464   
96     -320   
-544   48     
224    240    
80     448    
0      336    
160    480    
-144   -160   
1104   208    
-2368  -480   
1136   -688   
992    -256   
-1136  720    
-400   -2096  
432    -1120  
336    -336   
-672   192    
-16    -48    
48     -144   
-48    -256   
96     -400   
-144   -368   
176    -128   
-304   -368   
640    -1200  
-192   -736   
-1296  -528   
192    -32    
-64    48     
-128   -320   
-208   -192   
-688   -528   
-992   -1488  
-128   -1024  
336    368    
32     336    
-16    352    
-304   -176   
-368   -224   
32     -784   
-576   -880   
-560   -144   
368    448    
0      -368   
352    -544   
0      -176   
-784   -160   
128    240    
-208   160    
-144   -176   
144    64     
144    -16    
-1040  176    
-400   432    
-288   -272   
-32    80     
96     -96    
1264   2048   
-2240  416    
48     320    
1952   -272   
-1344  -768   
-400   -656   
240    112    
272    1472   
-352   -464   
-528   336    
-32    -208   
160    384    
64     -288   
0      144    
-192   -224   
-448   -16    
224    448    
-192   160    
80     -16    
16     -144   
-352   -240   
144    -80    
336    16     
-240   -304   
-416   -336   
-128   -384   
192    -336   
128    -80    
240    -160   
-304   352    
-64    -96    
160    288    
-80    -112   
-128   -128   
0      272    
-176   448    
-352   -32    
208    -32    
-416   -32    
0      -736   
-1200  -528   
-240   -16    
-208   -816   
-96    -32    
368    32     
-112   288    
-112   272    
-80    -528   
272    -736   
-240   448    
-432   -80    
-112   736    
1408   -528   
-720   336    
-256   176    
-240   96     
-64    -400   
352    272    
-240   464    
16     -816   
-624   -800   
192    224    
240    112    
-320   48     
64     -128   
48     432    
64     384    
-96    256    
-96    384    
112    -96    
-384   -192   
320    176    
-160   -32    
-96    64     
336    608    
-256   80     
0      32     
224    80     
-752   0      
-208   176    
0      -864   
944    -800   
-496   624    
-272   -880   
-48    912    
160    880    
64     -144   
64     -96    
-192   224    
-128   -304   
144    -688   
208    128    
-32    16     
-144   704    
-48    256    
240    144    
-432   96     
-240   96     
176    112    
112    256    
-208   16     
-48    -832   
-176   432    
384    448    
-112   128    
64     624    
-464   768    
208    592    
-240   832    
-176   -16    
-32    -192   
80     -144   
160    -48    
-128   192    
48     160    
-48    16     
-128   -144   
-32    32     
-96    128    
288    128    
-208   0      
-160   96     
304    80     
-176   16     
432    176    
-256   48     
-400   160    
224    112    
16     -32    
256    -16    
1088   384    
-1968  480    
192    432    
1216   240    
-304   208    
-800   -352   
-32    192    
384    288    
-448   96     
176    48     
432    208    
-512   -32    
160    112    
-112   -64    
208    192    
80     80     
-224   -96    
288    288    
368    -80    
-208   208    
-48    0      
528    1328   
-640   -672   
-336   272    
256    48     
-240   160    
-144   0      
304    160    
192    272    
-224   352    
80     -112   
208    48     
48     128    
-32    112    
-80    192    
64     32     
-16    96     
-80    -96    
-240   -464   
160    -464   
240    160    
80     32     
320    624    
-368   -224   
-1168  -1888  
1120   -544   
912    -160   
-240   0      
448    240    
-400   -80    
-16    0      
592    -208   
-384   -144   
-112   112    
-192   448    
-224   -48    
384    160    
736    48     
-208   528    
-464   240    
-224   416    
608    160    
-224   208    
-192   -16    
144    64     
288    -144   
-608   32     
-112   192    
592    32     
-384   -800   
1600   -3456  
-3136  -1824  
1088   -112   
528    288    
-592   -176   
-448   -128   
352    368    
528    144    
-384   160    
-608   48     
528    64     
320    112    
-592   64     
64     144    
128    -16    
208    96     
-48    -128   
-800   -144   
-304   -304   
576    -48    
144    -256   
-160   288    
-80    240    
-480   32     
224    192    
96     160    
-112   112    
-64    304    
464    288    
-208   320    
-64    48     
128    304    
96     -64    
80     336    
-128   -160   
64     352    
128    -240   
224    144    
-128   -80    
176    -48    
192    64     
144    144    
-256   -192   
128    144    
-240   80     
352    32     
-128   16     
224    112    
-256   272    
256    -32    
384    32     
96     512    
-896   464    
416    -2368  
80     -48    
-224   16     
-16    -224   
-112   -1216  
-96    -576   
128    -16    
224    112    
-176   48     
80     -128   
240    192    
-112   16     
-32    80     
16     -656   
64     -48    
-16    -1072  
128    -192   
-64    -144   
96     -128   
-112   -96    
0      -160   
-192   -16    
144    496    
32     384    
-48    -192   
64     -160   
-96    -336   
-32    208    
576    2560   
816    16     
-1344  96     
576    48     
-16    240    
272    240    
-304   160    
112    496    
112    400    
-16    128    
144    -80    
48     -128   
-32    176    
32     -672   
32     144    
-64    -240   
-32    256    
144    0      
-80    464    
-32    -80    
-224   -560   
528    -816   
-384   672    
240    304    
112    -576   
32     -80    
176    160    
48     96     
16     -192   
144    320    
0      -448   
0      -352   
192    -352   
176    528    
224    240    
368    -768   
-480   -320   
-128   -192   
208    336    
112    -368   
-64    -672   
16     96     
-256   -1120  
48     -208   
320    176    
-320   48     
64     112    
80     -16    
32     -992   
-688   -1040  
1440   -384   
64     816    
-1488  -464   
1616   -320   
-272   544    
128    -32    
624    -96    
-208   -496   
-80    48     
-112   -128   
272    -384   
128    128    
32     -208   
-176   -480   
144    448    
144    16     
-48    -320   
-16    -256   
288    176    
-288   48     
224    -560   
-1920  800    
1408   -864   
560    -160   
-560   592    
112    288    
576    1632   
-704   640    
-160   -2144  
496    -976   
-192   880    
80     432    
-32    -320   
64     -608   
224    128    
176    -224   
-384   -160   
448    160    
48     176    
16     -80    
16     48     
-128   64     
-96    80     
576    864    
-656   704    
-624   -576   
1440   -864   
-240   368    
416    -32    
-640   128    
-224   272    
-304   208    
-848   224    
16     -448   
-352   -304   
-32    -240   
112    -1520  
-1184  -928   
576    -496   
-128   64     
208    -192   
-240   112    
-400   592    
448    512    
-256   864    
144    -96    
-528   -192   
256    -144   
-160   80     
-112   -96    
-1040  1488   
640    -864   
208    -704   
-1056  -688   
848    1664   
176    432    
-80    64     
-304   -368   
-352   -144   
304    -192   
288    304    
-464   176    
0      -320   
-64    240    
224    -208   
-80    224    
-208   -352   
144    -416   
160    -992   
-16    -416   
-160   -112   
176    272    
-736   -384   
640    736    
-464   368    
144    -176   
48     -288   
-400   -896   
-384   -976   
256    -784   
240    464    
-80    640    
48     192    
288    -1200  
-144   -240   
-144   0      
256    -368   
-368   -96    
144    -432   
32     32     
48     -112   
80     48     
64     96     
272    1008   
16     736    
0      528    
512    352    
-352   144    
-224   -496   
-112   -448   
624    992    
-464   528    
-368   -912   
-80    -848   
160    -1568  
64     -1024  
16     -1184  
80     -688   
-96    -496   
96     -400   
-48    -64    
-816   -32    
-64    384    
-320   144    
112    -80    
-160   -128   
-304   48     
-288   -128   
128    -80    
-48    192    
224    -16    
-112   128    
0      16     
-112   64     
-400   -240   
560    -416   
-176   -160   
-64    1136   
384    848    
-400   176    
448    2880   
688    80     
-1104  32     
-400   240    
176    -80    
304    432    
16     -224   
-384   304    
256    16     
-320   -96    
432    -48    
-112   208    
-208   16     
160    -32    
80     256    
112    -144   
-208   400    
160    16     
-192   -176   
96     128    
-240   832    
-432   -592   
-1088  416    
1664   192    
-528   -256   
-640   288    
240    160    
96     432    
-256   224    
-192   -400   
128    16     
-48    -64    
-272   64     
144    0      
-128   64     
-176   16     
-192   80     
96     -96    
-208   176    
144    -176   
16     160    
48     0      
-384   128    
64     48     
160    -32    
144    144    
-304   -96    
-32    128    
176    -80    
64     784    
256    752    
-736   1008   
448    32     
-480   -304   
544    -48    
-704   -96    
320    144    
192    -192   
80     -16    
16     80     
-304   192    
32     0      
-32    -16    
320    192    
320    64     
-704   16     
480    48     
-848   -48    
288    16     
-208   -48    
-80    -160   
1056   1072   
208    -224   
-1072  624    
1968   -128   
-1280  32     
-160   -80    
768    16     
-432   -176   
80     -16    
-240   -80    
80     112    
-16    -32    
-128   32     
16     64     
-16    144    
144    -224   
-96    544    
16     0      
-128   -32    
336    144    
-272   -240   
48     176    
432    -64    
-368   112    
-96    576    
-64    624    
-224   112    
-304   400    
432    128    
80     128    
-352   0      
-96    176    
128    384    
-208   16     
80     -96    
656    -160   
144    880    
144    144    
80     128    
-336   144    
-256   160    
-80    -160   
-16    64     
112    -80    
-528   32     
160    112    
144    -112   
112    272    
-1152  -496   
1824   -2912  
-416   336    
480    384    
-512   160    
-592   64     
496    160    
608    256    
-32    320    
-1120  64     
432    304    
592    32     
-208   64     
16     80     
-48    16     
48     112    
160    112    
32     48     
-320   128    
304    880    
528    464    
-576   224    
112    -48    
-112   160    
-256   0      
432    128    
-144   -48    
-176   272    
576    -32    
-192   -32    
160    240    
48     16     
-64    -32    
-320   -256   
352    -256   
-352   -336   
96     -80    
48     128    
-208   -96    
304    32     
-128   128    
128    -160   
-208   -368   
-192   -288   
384    304    
496    1408   
-560   0      
-240   -640   
256    -448   
-256   -544   
96     -96    
-112   128    
32     -256   
-96    -96    
288    240    
-96    64     
-64    -160   
-544   -752   
288    -304   
448    -496   
-272   -288   
-160   -176   
-64    -144   
16     -32    
304    192    
224    -304   
-448   -48    
-128   -816   
320    -400   
64     -512   
-96    288    
-224   192    
304    192    
32     -64    
80     -64    
-208   -400   
176    -304   
128    208    
112    -288   
32     544    
-272   -48    
1056   1184   
-1216  832    
208    -448   
880    -496   
0      640    
-480   80     
32     976    
544    -352   
-224   416    
-32    32     
-80    336    
-144   112    
256    -16    
16     16     
-320   176    
96     432    
192    -80    
176    320    
-112   208    
-48    448    
608    688    
-688   752    
176    -384   
480    608    
-496   144    
-256   -208   
304    -128   
304    240    
0      384    
-112   32     
-16    144    
32     -176   
112    64     
0      -960   
-160   336    
384    224    
-352   560    
-112   -240   
448    144    
-128   -304   
-336   160    
128    208    
320    64     
64     160    
16     -192   
-112   96     
160    -320   
336    288    
-112   -816   
-240   160    
-384   -1296  
-544   -128   
-32    -208   
-528   48     
320    -304   
352    -304   
336    144    
-544   -128   
-384   -160   
208    -688   
464    384    
-240   288    
-112   32     
256    -432   
64     -224   
-64    -2688  
-32    -48    
272    -176   
-448   -624   
64     688    
-176   -384   
1280   800    
-304   -64    
-512   -48    
512    -560   
-704   48     
352    -64    
928    560    
208    -1408  
-944   -1616  
176    -640   
256    624    
-256   272    
464    -112   
80     -272   
80     -160   
-288   -48    
528    -320   
80     -208   
-256   -784   
64     400    
96     -224   
-16    -416   
176    -368   
-64    1088   
-160   1968   
-80    1584   
96     1152   
256    960    
-464   416    
288    160    
112    -496   
-240   -96    
352    912    
304    128    
-496   64     
336    -416   
944    752    
720    544    
-272   128    
96     288    
0      -80    
400    832    
-320   304    
-96    272    
-64    272    
192    -1040  
64     176    
-464   -160   
0      -80    
256    -2880  
-1744  -1136  
320    80     
640    -352   
496    -672   
-816   0      
48     -240   
160    1008   
512    -576   
32     0      
-496   128    
-112   -128   
608    -16    
288    -736   
-608   -384   
-224   -1264  
416    0      
352    -80    
224    -976   
-736   -416   
224    352    
160    -128   
-64    320    
688    -160   
-752   -272   
-112   32     
272    -208   
-80    0      
32     -240   
-128   -544   
-336   -96    
208    -96    
16     -704   
384    -432   
32     -944   
-304   -80    
176    0      
128    208    
-336   -96    
128    96     
-144   -112   
-16    -272   
-560   -176   
112    -144   
304    128    
-384   112    
192    848    
336    -112   
-672   -160   
128    -224   
160    0      
-480   128    
656    -80    
48     -368   
-192   -352   
240    48     
-192   96     
144    176    
112    16     
-160   -96    
32     -192   
48     0      
128    -416   
-96    160    
144    -512   
112    176    
-80    -160   
80     -32    
288    16     
-672   272    
416    -128   
32     144    
-128   -128   
-16    32     
-272   -224   
336    640    
432    80     
-352   -160   
0      224    
96     -576   
912    2992   
-1584  -1440  
-832   352    
1680   0      
-608   -256   
-208   -32    
240    96     
320    256    
-160   -96    
160    -48    
-48    128    
-272   16     
336    -416   
48     -80    
-272   -48    
304    384    
-352   -816   
192    -16    
128    0      
-112   16     
-192   0      
528    1056   
736    -128   
-784   32     
-768   160    
160    -192   
-160   48     
-80    -464   
-32    96     
-336   -192   
160    32     
176    -896   
128    -96    
-256   64     
304    -160   
-208   208    
176    128    
-400   -64    
128    64     
-320   -176   
208    16     
176    64     
64     32     
-48    112    
-320   -96    
608    160    
-304   -304   
96     48     
64     112    
-224   48     
-32    1744   
0      1120   
-720   432    
144    -496   
-80    160    
288    -64    
-224   -32    
288    -160   
-272   -32    
-720   -192   
96     96     
-16    -48    
-576   16     
-32    -96    
-176   -32    
432    32     
-432   -16    
-128   0      
432    -64    
-352   16     
80     -16    
-16    -224   
-2016  448    
1504   112    
-864   -480   
-816   80     
912    80     
-64    288    
-832   96     
160    -176   
256    96     
-496   -16    
-144   -16    
192    112    
-320   -16    
128    -48    
128    144    
-224   96     
-128   208    
80     80     
256    0      
-192   -176   
336    224    
544    -32    
-704   -32    
-16    176    
-176   112    
192    208    
912    -752   
-848   416    
208    80     
48     80     
288    -32    
176    64     
-32    80     
-48    -288   
352    -144   
-64    96     
-384   544    
-480   80     
16     64     
208    -32    
-176   -48    
-736   -240   
-144   32     
-224   -368   
288    -32    
-80    -48    
-400   80     
240    -176   
-784   -1952  
-1136  -160   
-576   112    
496    128    
1328   -32    
-1040  -16    
-400   128    
368    0      
-304   -144   
528    0      
-288   128    
-80    -64    
-48    32     
-32    -80    
0      -80    
272    160    
-112   -32    
32     80     
32     -32    
-368   272    
304    624    
-16    32     
-32    16     
-256   -80    
256    256    
-864   -272   
-544   176    
272    -96    
80     256    
448    48     
-560   -144   
48     -224   
432    -256   
128    352    
-784   -48    
144    16     
512    816    
-416   960    
112    384    
304    528    
-304   80     
96     384    
112    16     
80     144    
16     672    
208    816    
-64    64     
144    -96    
-128   784    
224    112    
-64    -32    
-240   -432   
448    -208   
-464   -848   
272    80     
-208   -144   
-448   -1648  
-144   -576   
240    1248   
-176   272    
144    16     
0      -112   
16     176    
-160   -64    
240    -96    
80     576    
32     256    
-320   240    
-128   -112   
240    464    
96     -112   
48     48     
-144   48     
16     112    
160    528    
-144   -48    
80     -16    
128    192    
-272   416    
-80    16     
416    -64    
-192   -480   
-384   16     
-160   64     
192    -32    
-48    32     
160    -144   
-256   192    
-176   272    
144    16     
208    64     
0      96     
16     16     
-144   32     
-32    208    
288    16     
-320   272    
128    80     
-160   -112   
192    64     
-528   -272   
688    -352   
144    752    
-288   -48    
-80    144    
-96    112    
-96    -144   
336    -416   
208    192    
-272   160    
-160   144    
192    -48    
112    0      
-96    32     
32     0      
32     80     
-304   -48    
-48    -208   
176    -528   
32     -64    
96     0      
160    16     
96     48     
-288   -192   
-80    -64    
240    -32    
160    64     
-80    160    
336    240    
-224   448    
1184   1712   
-576   752    
-1856  -544   
2064   240    
-384   384    
-688   608    
352    848    
784    -624   
48     -48    
-16    416    
96     -176   
-240   240    
256    112    
48     624    
-384   -592   
256    176    
320    208    
32     208    
-384   -704   
-80    -96    
64     -192   
1040   1120   
-64    0      
-784   -256   
1072   -192   
-528   464    
160    544    
192    2160   
1200   1312   
-336   1040   
64     1200   
64     160    
80     -176   
320    -112   
64     336    
-16    -32    
-16    160    
-80    816    
720    128    
144    400    
-576   800    
-80    208    
624    96     
32     -432   
-384   -1072  
288    -96    
864    -240   
-192   -80    
192    80     
-240   352    
80     240    
448    288    
-224   144    
-480   -16    
288    -736   
-496   384    
272    -160   
-608   -48    
64     256    
352    -144   
-432   64     
368    -352   
0      -144   
208    368    
48     96     
224    0      
496    112    
-32    80     
128    944    
-672   640    
-144   -2144  
-1280  -720   
-48    -144   
608    272    
864    -160   
-624   384    
-96    -2336  
-608   416    
704    -192   
-448   112    
208    -48    
-352   128    
144    -48    
464    -80    
-432   64     
320    64     
-208   144    
192    -32    
176    -864   
-800   -1504  
304    272    
0      -240   
224    224    
752    -992   
-832   64     
144    -16    
48     96     
256    16     
-528   16     
80     -80    
64     224    
240    304    
-144   240    
288    544    
32     -128   
96     448    
-400   -128   
80     304    
416    -32    
-160   112    
-128   -240   
112    176    
-160   16     
448    224    
-288   16     
384    -176   
-208   -128   
-80    -224   
192    416    
176    240    
-192   240    
-256   -1120  
-240   -48    
128    -688   
352    -96    
-192   -128   
288    -96    
-64    128    
-16    80     
-256   -80    
208    -96    
32     112    
64     -176   
64     112    
32     -112   
-112   240    
16     240    
480    496    
-48    -592   
-416   288    
464    144    
-208   176    
-32    176    
224    16     
-224   -16    
112    -624   
160    512    
-160   256    
192    -160   
64     -112   
992    1744   
-2832  672    
656    96     
1072   -48    
-624   -400   
-64    -80    
208    -1616  
-64    128    
32     -1200  
288    -688   
-240   48     
-112   -304   
304    -176   
80     -1360  
-288   -576   
64     96     
112    208    
-48    -16    
176    -224   
32     -576   
-352   -608   
768    -1008  
-752   448    
64     -80    
416    112    
-416   -80    
16     -112   
448    352    
224    -192   
-368   256    
272    -240   
112    160    
208    -384   
-320   32     
48     -768   
32     -80    
416    -160   
-448   48     
176    64     
32     -112   
-112   -32    
-96    128    
144    32     
48     -48    
352    112    
-320   -1264  
-208   48     
96     48     
288    32     
-320   -240   
-176   3200   
2288   832    
-1440  -64    
-336   -720   
128    -112   
-144   16     
-304   432    
256    640    
-128   320    
-368   96     
368    -720   
64     -80    
80     -144   
128    320    
-544   -176   
320    272    
16     -240   
-208   -144   
480    -80    
-64    -128   
-144   112    
-384   -672   
-288   528    
1232   -352   
-1216  -352   
352    -128   
528    48     
-320   -880   
-528   -272   
304    -32    
304    112    
-176   -32    
128    -32    
-112   80     
-160   -272   
-32    112    
224    -96    
-736   -48    
64     16     
-112   16     
16     -112   
0      -32    
544    -672   
464    -528   
-880   304    
864    64     
-624   16     
-144   -16    
640    48     
-496   208    
-256   -192   
320    -16    
160    16     
0      -192   
-944   64     
-288   -400   
240    -272   
48     32     
80     -32    
-272   -1568  
240    -128   
368    640    
-352   -272   
-480   -64    
336    -96    
176    224    
-96    224    
-208   -112   
-400   -336   
976    -304   
-128   -3328  
-2256  -464   
144    -400   
1120   320    
272    -464   
-512   224    
-288   -80    
-688   128    
352    -160   
544    -16    
-16    -16    
-336   16     
-176   144    
320    -48    
-96    32     
0      -48    
-64    272    
-64    -32    
208    80     
-160   336    
160    832    
-64    288    
48     112    
384    -128   
160    272    
-336   288    
-192   -160   
208    832    
368    1072   
-304   -304   
-176   -160   
224    272    
112    -320   
-32    -64    
-192   -288   
-272   -128   
160    -160   
368    -208   
48     576    
-240   48     
48     -416   
-240   192    
-64    -16    
-560   -688   
80     928    
-192   336    
-320   384    
240    240    
-304   -400   
32     400    
-272   32     
-208   -736   
128    128    
240    32     
-1696  -784   
464    -224   
-400   624    
-272   -720   
-96    176    
48     288    
192    -96    
16     80     
-160   -144   
-80    -448   
-368   -320   
-224   256    
160    0      
-128   -176   
320    112    
-80    224    
80     -16    
-752   64     
48     0      
-80    -176   
-96    64     
32     -80    
352    304    
-432   368    
208    112    
160    -64    
-224   80     
-112   1104   
720    -64    
-608   64     
144    96     
-272   80     
0      128    
-80    224    
-16    -384   
336    -224   
192    224    
-80    144    
0      -48    
-176   -368   
272    -48    
-16    64     
-144   192    
-32    -64    
-160   -32    
128    -16    
-144   -80    
224    -144   
128    336    
-544   -80    
-80    336    
288    -80    
-224   -272   
64     -352   
16     48     
0      288    
-112   64     
-32    -48    
288    -320   
-64    -16    
-272   -176   
80     48     
-128   -432   
16     -32    
-208   -608   
112    -80    
16     -224   
-32    0      
32     80     
336    -64    
-160   -16    
64     112    
64     352    
-352   144    
368    432    
0      128    
1216   1632   
-1280  768    
-816   80     
1088   -320   
-128   288    
-1168  -528   
160    96     
320    -160   
0      -176   
-16    416    
144    752    
-288   736    
256    320    
128    112    
-64    -48    
-320   -160   
-32    -192   
272    -48    
-32    496    
-304   496    
272    240    
-960   -576   
1376   -448   
-112   -848   
-384   2016   
2080   752    
-752   416    
896    528    
-544   320    
-208   -256   
464    32     
-144   16     
-112   176    
-192   -512   
-144   -144   
400    208    
-112   32     
-144   48     
32     160    
-32    -160   
384    -432   
48     112    
-320   -464   
496    272    
-224   -64    
-48    -80    
560    624    
-784   176    
-224   -288   
64     208    
368    496    
-240   96     
-240   -48    
-16    -96    
-176   16     
272    -112   
560    -576   
160    416    
352    0      
-720   -48    
48     48     
16     -64    
224    144    
112    208    
64     -96    
32     80     
224    112    
32     112    
-208   48     
-128   -800   
1184   -1296  
-2304  128    
-112   -32    
1072   -144   
256    -256   
-176   160    
-624   -128   
288    528    
128    -64    
416    -144   
-32    -80    
96     144    
-144   16     
208    256    
32     -144   
-32    352    
-144   32     
96     144    
464    640    
-352   288    
-32    560    
480    -208   
-512   208    
-736   -96    
432    160    
576    -16    
-640   496    
432    -80    
-192   272    
272    -32    
0      224    
0      0      
96     0      
-128   -128   
304    256    
64     -32    
16     0      
256    -448   
-240   176    
672    112    
-480   112    
192    176    
416    192    
-160   144    
288    192    
-400   80     
592    160    
-176   16     
-64    16     
176    64     
96     48     
464    1248   
-688   -80    
-48    464    
784    -128   
-688   96     
-48    224    
320    224    
224    48     
48     128    
160    208    
80     192    
-96    112    
64     240    
112    -32    
-80    160    
64     1088   
144    288    
-224   192    
496    -224   
-224   32     
-208   160    
432    272    
128    -16    
-128   16     
-240   0      
256    -272   
48     -128   
-288   448    
48     112    
-464   -1520  
1472   256    
-720   320    
-48    80     
176    -1360  
-512   48     
304    640    
672    -176   
-352   -800   
-368   304    
240    -64    
368    -160   
-48    240    
-224   -32    
-32    -288   
256    128    
96     176    
128    -368   
-352   96     
32     -2128  
320    128    
-208   480    
880    -400   
-576   96     
-352   160    
432    32     
208    112    
-32    496    
128    16     
-160   -144   
128    48     
288    96     
-112   -176   
-80    272    
368    -624   
-272   128    
160    240    
-48    96     
-144   512    
576    96     
-224   -64    
-64    -80    
96     144    
0      -32    
256    256    
-400   -80    
256    176    
80     -192   
16     0      
-128   -848   
1648   2240   
-624   -1712  
-3056  320    
1728   528    
-48    -144   
-912   176    
752    -144   
320    448    
-432   -80    
128    320    
208    -256   
0      160    
-80    -256   
-80    32     
448    -208   
-112   0      
-240   -192   
192    48     
96     -32    
384    -80    
-320   -192   
688    1104   
-1440  -96    
80     272    
672    -48    
-368   -912   
64     -304   
-320   272    
160    128    
-64    -192   
48     48     
128    -304   
416    496    
-192   48     
256    400    
-272   -112   
-208   -96    
416    48     
-384   80     
240    -208   
128    -64    
-128   -96    
64     -368   
-304   592    
-320   -640   
432    128    
80     560    
-224   -576   
-336   496    
368    -848   
-832   256    
240    -608   
-16    -640   
320    -160   
-32    -96    
-800   -464   
-304   224    
768    304    
80     -128   
-224   -240   
560    368    
192    32     
-144   -1328  
16     592    
-64    -880   
416    576    
-528   112    
-112   -32    
-112   256    
464    -416   
-592   -720   
832    -608   
2032   672    
-1328  784    
-416   32     
688    -496   
0      -560   
288    320    
-80    -1472  
-544   -688   
448    320    
160    -80    
-176   -416   
-32    -16    
32     256    
528    288    
-192   -272   
192    128    
0      -224   
-16    240    
16     112    
96     -80    
-32    -208   
-592   448    
672    112    
-624   -160   
576    -544   
-32    176    
-288   352    
-208   144    
336    352    
224    -384   
272    -592   
-320   -928   
240    -160   
-64    -144   
288    480    
112    128    
-528   -288   
320    -304   
160    272    
352    -240   
-192   -32    
96     -208   
0      320    
-32    64     
-128   -304   
208    -416   
64     -272   
-208   224    
144    -256   
-160   -1024  
-208   160    
672    320    
-160   -240   
336    -304   
-112   -640   
448    112    
-256   1296   
32     240    
-1008  -176   
160    -352   
-160   -128   
-208   -464   
0      -272   
112    -384   
224    96     
32     -240   
-16    -48    
32     16     
-112   -32    
-48    0      
96     32     
-112   -128   
32     -128   
-160   -48    
240    288    
-160   560    
320    112    
96     128    
0      -256   
592    416    
-880   368    
656    -304   
-112   320    
16     -256   
-176   240    
-16    0      
-336   48     
48     304    
-160   -64    
-80    -320   
-16    -80    
320    -352   
-224   320    
-96    -16    
208    48     
32     -432   
-144   -256   
-80    16     
128    144    
-592   800    
896    192    
-1024  160    
480    192    
-128   448    
112    -16    
-624   -128   
-64    432    
-352   0      
208    -384   
432    80     
0      240    
-496   -272   
-80    48     
400    -224   
192    416    
-96    96     
-416   -16    
112    176    
160    -256   
64     -208   
96     160    
-1152  -272   
224    0      
144    80     
-528   0      
-144   48     
-448   -80    
-208   -96    
48     752    
592    32     
-1472  336    
1168   256    
-736   -176   
448    272    
-256   160    
16     448    
128    16     
16     432    
-176   -128   
-112   160    
288    -64    
-48    48     
-672   0      
160    -64    
192    96     
-720   -128   
0      176    
256    -96    
-128   192    
32     336    
576    -1184  
-1328  -240   
448    -272   
80     288    
-432   496    
-336   -64    
960    -160   
-752   160    
96     80     
-80    -96    
-320   128    
416    112    
0      -144   
-128   176    
64     -80    
-96    192    
-96    -16    
-96    -176   
-288   80     
96     -256   
640    240    
-176   16     
32     -240   
-128   -64    
-96    -336   
1008   112    
1184   896    
-768   -48    
-912   112    
656    -80    
448    0      
-144   -48    
-64    896    
-560   1136   
976    112    
608    -80    
-576   -176   
-128   -288   
32     -144   
672    16     
-48    256    
-432   -192   
-256   -80    
352    -384   
-320   80     
224    16     
-480   -16    
976    1376   
768    2784   
-2816  1072   
1392   -176   
1168   -16    
-1168  0      
-496   -80    
688    0      
176    -64    
-240   16     
-224   -368   
160    320    
176    48     
-320   64     
-160   176    
-96    -176   
400    192    
0      0      
-560   96     
384    336    
144    -192   
-304   384    
688    -160   
-624   176    
-592   -128   
-432   -240   
432    400    
-176   192    
16     224    
-112   112    
112    -64    
320    80     
-80    144    
-16    64     
-224   224    
-192   -320   
48     224    
352    80     
-640   -80    
864    -144   
-336   -208   
112    208    
-272   -48    
-96    160    
384    16     
-48    96     
-16    -176   
-560   -416   
384    16     
128    48     
240    352    
-240   208    
304    1216   
-832   432    
224    16     
-160   -336   
-400   -32    
192    464    
544    144    
-32    0      
-320   144    
80     32     
128    -64    
-96    16     
32     160    
16     144    
-64    64     
-16    112    
-16    -240   
-16    -208   
-288   112    
384    448    
320    80     
-288   -240   
-128   -16    
-64    64     
176    -64    
144    144    
-240   -256   
-16    64     
-16    112    
-608   -1072  
1520   528    
-768   224    
-624   320    
560    -48    
-416   96     
192    -64    
144    320    
480    1136   
-128   32     
-128   -480   
400    256    
16     -16    
-128   128    
32     240    
208    -304   
-80    256    
368    128    
-112   32     
-80    -176   
16     224    
48     1168   
1024   -320   
-736   16     
-112   352    
320    96     
112    64     
-208   -512   
-32    -112   
112    208    
64     -48    
128    192    
-224   -16    
160    -128   
-176   144    
304    0      
-208   128    
48     -80    
16     16     
208    -208   
-16    176    
96     208    
48     128    
16     112    
112    112    
-448   96     
496    160    
-208   80     
224    -64    
-288   -48    
1664   784    
-1248  400    
-1168  320    
1856   112    
-1024  -96    
160    256    
-224   176    
-16    -80    
320    -144   
-48    0      
96     -16    
-160   128    
-64    112    
160    32     
272    -16    
-32    -1104  
-256   64     
96     96     
208    208    
-16    0      
-96    96     
-432   -816   
864    -432   
-192   -368   
-160   -224   
496    400    
272    384    
-272   384    
-352   -320   
48     -48    
384    -160   
384    176    
-240   128    
-336   128    
544    -16    
304    -32    
-480   112    
0      -480   
-304   80     
288    320    
32     -16    
0      -16    
-208   -224   
-320   -496   
48     0      
-160   -1248  
128    -128   
1088   0      
736    1488   
-336   624    
320    176    
-176   48     
112    -432   
288    624    
-384   416    
-416   -304   
832    -672   
16     176    
368    -448   
-16    224    
-80    240    
32     -48    
176    -384   
112    -192   
-128   192    
-48    -608   
-512   -64    
-112   -64    
80     -384   
112    -176   
48     112    
-320   1696   
1792   320    
-1616  -1264  
-592   -1056  
1200   -480   
-336   384    
-16    96     
-304   128    
160    160    
48     -480   
224    432    
-336   -80    
-160   64     
160    192    
16     -144   
208    80     
-144   384    
480    -192   
96     560    
-304   -224   
64     -528   
64     0      
384    128    
64     160    
-480   816    
208    -416   
528    352    
-96    256    
224    -304   
-256   336    
240    -560   
320    608    
-16    112    
-176   384    
-64    480    
352    144    
192    -320   
-608   208    
112    -96    
128    -96    
384    -32    
112    464    
-256   144    
208    256    
256    768    
0      -624   
-144   176    
0      768    
272    128    
64     0      
480    -16    
-1104  432    
432    288    
144    -272   
144    -32    
64     0      
-48    112    
64     224    
112    -288   
304    -1136  
-32    112    
-256   -352   
240    -64    
160    0      
32     -208   
48     512    
-48    -288   
496    -160   
512    32     
32     -992   
80     16     
-16    -48    
80     320    
-576   128    
144    -832   
-16    -192   
-32    -176   
176    -592   
48     -1568  
-112   80     
-32    -1152  
-688   -128   
80     832    
0      656    
-32    -112   
-112   288    
32     544    
-64    -16    
-208   -544   
320    64     
80     -64    
-224   -432   
-48    -512   
192    -752   
144    64     
112    -912   
32     -96    
-96    -304   
160    96     
192    -240   
-48    -528   
-448   384    
400    -128   
-160   -928   
112    -208   
-1392  720    
-176   -176   
80     32     
112    -224   
64     -640   
-144   -80    
-16    -272   
240    -720   
160    80     
16     -272   
-16    208    
0      496    
320    80     
-144   192    
64     -208   
-160   -32    
-64    16     
-64    224    
64     -16    
0      240    
352    -96    
160    -32    
-16    -1232  
272    0      
-624   -1152  
960    -800   
-80    -368   
-320   -336   
752    288    
-288   -224   
-880   208    
656    464    
-1104  144    
112    -320   
-48    -64    
-80    -224   
-96    -32    
48     -480   
464    32     
-464   -32    
304    48     
-96    240    
-112   16     
32     176    
160    -32    
-192   176    
-656   -848   
32     -96    
736    -400   
-1616  32     
944    0      
32     96     
-144   240    
64     -192   
-512   176    
400    -32    
-48    96     
-112   -96    
-384   -32    
544    16     
-416   32     
-96    -96    
-272   240    
224    -48    
-240   192    
-112   -80    
-352   -672   
144    -128   
288    240    
-176   -688   
144    720    
-176   256    
352    -16    
64     640    
112    240    
-528   -64    
-256   32     
384    -224   
-192   -48    
-64    640    
112    -192   
448    240    
128    112    
-128   224    
-208   32     
-304   -32    
-272   64     
192    112    
32     -240   
0      480    
-48    -48    
-896   -32    
432    80     
160    -16    
-1328  1152   
976    2976   
1360   304    
-3168  -368   
-208   32     
1504   16     
-336   16     
-1328  64     
-32    80     
704    -288   
176    480    
-384   -80    
-384   -96    
-32    -32    
-560   -144   
192    -32    
-384   48     
112    32     
-96    -32    
832    448    
-1328  352    
416    304    
-16    -48    
128    -48    
112    -48    
-1104  -32    
720    432    
-672   128    
32     64     
208    -48    
80     48     
-384   -64    
160    16     
-464   -448   
464    192    
-224   80     
-32    448    
16     160    
-320   352    
-64    48     
-176   0      
192    16     
-16    160    
16     -32    
112    -144   
-128   -224   
-224   32     
96     160    
80     176    
96     112    
-208   320    
288    192    
-336   272    
496    -128   
-336   -80    
-384   208    
608    64     
-400   -80    
16     528    
-464   256    
160    224    
112    -80    
-64    32     
-64    96     
48     224    
64     272    
-48    144    
-320   192    
32     -304   
-80    -608   
-192   -352   
-32    80     
-96    192    
-224   176    
80     -480   
80     224    
80     -176   
-176   -448   
-64    -848   
-16    -112   
64     128    
736    2288   
-2448  208    
592    192    
912    -928   
-592   400    
64     32     
-400   -272   
416    -352   
-512   -368   
176    -80    
-288   80     
48     -48    
288    -32    
-160   -48    
-112   -304   
64     288    
32     128    
112    -80    
-48    32     
-256   -80    
-256   -352   
336    -1456  
304    -160   
-432   576    
256    928    
-112   272    
-96    -400   
272    -64    
-16    272    
-64    144    
-96    112    
0      -160   
-192   -176   
192    -32    
-176   272    
-224   -80    
208    32     
288    304    
-448   64     
32     240    
208    -192   
0      176    
48     128    
48     -176   
-64    240    
208    -160   
-48    -64    
-16    416    
-160   -32    
304    -272   
320    -704   
-2400  976    
1504   656    
-80    -368   
-816   208    
336    80     
-496   896    
112    1584   
-96    -432   
64     -400   
96     -64    
-256   144    
208    -16    
-128   128    
-64    320    
384    368    
-224   80     
-16    864    
240    256    
-256   -464   
-256   -1136  
1264   976    
-96    -112   
-1264  -1104  
624    -560   
96     1152   
-288   1568   
448    1072   
32     128    
-368   -704   
-160   -560   
272    -256   
16     528    
-112   288    
128    -144   
-16    -208   
-48    48     
48     -368   
-528   -1152  
64     -848   
96     320    
176    272    
-32    624    
-528   -1152  
-144   -336   
224    544    
64     352    
-256   112    
304    1552   
64     1744   
-400   32     
736    -48    
-48    368    
-672   80     
640    16     
560    528    
240    608    
-496   752    
-480   272    
544    208    
-400   432    
96     400    
80     256    
48     -384   
-64    464    
-32    96     
-288   528    
688    320    
-432   880    
-304   304    
-208   -960   
1936   -1088  
64     -80    
208    -96    
-160   -352   
-416   -464   
464    -448   
400    1488   
-240   1040   
-496   -192   
-112   -128   
352    416    
-64    416    
16     -208   
-64    256    
-176   64     
32     -128   
-16    304    
-80    272    
272    448    
-192   208    
-16    -224   
-224   -1216  
752    304    
-48    320    
-496   224    
352    400    
32     -80    
272    -1072  
-64    -176   
-128   480    
192    384    
-192   32     
16     32     
480    0      
-240   -352   
-96    -80    
112    -2128  
96     -48    
-144   784    
80     352    
-48    -144   
-80    -160   
144    32     
16     -880   
-496   -304   
224    480    
-128   192    
112    688    
-16    -256   
80     -512   
-272   816    
928    -592   
-208   -96    
-208   528    
592    160    
160    384    
-192   992    
96     832    
80     -128   
-80    -256   
80     -208   
80     -176   
-48    -16    
144    -160   
-144   -48    
0      -48    
224    48     
192    272    
-256   144    
144    384    
-32    80     
64     -176   
208    -32    
-144   0      
0      -320   
144    320    
48     576    
-32    320    
-80    -64    
176    16     
-352   -976   
-128   496    
608    -512   
-544   -400   
448    416    
-80    -336   
-48    -464   
32     -64    
304    160    
-256   64     
0      160    
224    -48    
32     -64    
-224   0      
320    384    
-160   688    
80     544    
272    208    
-128   -64    
-384   -176   
816    32     
-336   320    
-48    80     
272    16     
-320   288    
48     -144   
-16    -112   
288    96     
-128   -80    
-96    176    
352    304    
16     -304   
-160   64     
272    -176   
-240   32     
224    -16    
-208   96     
512    160    
-544   16     
208    80     
240    64     
-112   176    
144    -256   
-224   240    
448    -672   
336    112    
-368   -96    
256    80     
-64    -16    
-1808  96     
-2144  -784   
2080   96     
-336   -256   
-640   224    
-672   -1056  
784    -624   
-288   -688   
-544   128    
448    -32    
224    80     
-160   -128   
-256   96     
160    -32    
224    32     
48     32     
64     -48    
96     96     
-240   -16    
-176   -32    
304    144    
-368   -816   
-928   -816   
1536   -368   
-96    -1728  
-224   -16    
96     320    
288    176    
-160   80     
80     -176   
-64    -560   
144    272    
-32    -96    
176    512    
-192   -144   
-400   176    
384    32     
-592   496    
224    336    
-112   208    
192    -144   
192    -656   
432    -384   
-832   720    
976    -288   
288    -368   
-496   16     
-128   -160   
128    176    
368    -528   
496    -240   
-112   64     
-368   176    
320    64     
448    320    
-192   -784   
-96    -368   
672    880    
-288   -208   
-240   -368   
656    -208   
176    192    
80     -320   
-384   0      
-96    -400   
960    -112   
64     -160   
144    -112   
-720   112    
-400   -1616  
-800   1408   
1104   -976   
-1040  -224   
336    -336   
-256   -256   
784    -1376  
-496   112    
-16    192    
-496   80     
192    224    
352    -176   
-160   -80    
0      -208   
-880   32     
400    -208   
-272   288    
368    -224   
-352   16     
928    -416   
-1200  240    
784    -1936  
-208   -48    
160    -16    
656    64     
-544   -32    
384    224    
-336   16     
288    272    
-304   240    
48     544    
-656   0      
-96    -144   
-48    -112   
16     -272   
144    -96    
-144   -160   
256    272    
-96    368    
-16    48     
48     96     
-192   -240   
192    96     
-528   -32    
448    224    
368    144    
-624   -16    
-16    -112   
352    336    
160    -64    
-320   112    
208    -112   
0      592    
512    -192   
-736   -1680  
128    -832   
96     432    
-96    288    
352    -288   
-320   -96    
-432   256    
-128   160    
32     0      
128    48     
208    144    
-64    64     
128    -352   
-112   256    
32     32     
-64    64     
-128   -32    
-64    160    
128    1248   
96     416    
-512   16     
16     -80    
-32    576    
544    -272   
-336   -816   
-112   -384   
-16    624    
1104   1072   
-1632  1088   
800    -496   
768    672    
-720   448    
-16    -272   
160    496    
192    800    
-160   -400   
96     496    
112    48     
-32    -288   
-16    0      
-320   -320   
-144   -16    
192    192    
-464   272    
-208   -112   
-512   -112   
32     160    
-240   448    
-1248  880    
512    -560   
592    -368   
-128   -192   
-320   64     
-432   1216   
640    -240   
-336   -176   
-128   -224   
-128   -320   
16     192    
-80    -464   
-128   160    
-320   -192   
48     144    
96     16     
-640   384    
-368   192    
-304   -400   
480    0      
80     208    
-304   48     
-208   -48    
304    -144   
-176   -272   
160    -48    
-128   32     
-192   160    
208    80     
16     -736   
-2832  -272   
1264   -32    
240    -688   
-336   -768   
208    32     
-320   -720   
-384   336    
304    0      
336    -272   
-272   80     
-288   224    
112    32     
-64    96     
-64    -112   
-48    16     
-32    112    
0      -80    
368    -48    
-48    -96    
-80    368    
672    -1248  
-1168  336    
896    176    
-544   -384   
0      -432   
432    208    
-784   -208   
112    -960   
160    224    
-304   960    
0      -176   
64     -64    
0      80     
-16    -560   
0      -512   
-144   -16    
-112   -48    
-496   32     
416    272    
64     64     
-432   -368   
400    -816   
-464   -288   
-736   -992   
240    -880   
-128   -880   
1104   -1040  
128    -1104  
-480   -624   
32     272    
-256   -80    
112    512    
-432   -96    
976    -480   
-256   352    
48     -464   
128    -624   
-384   -448   
544    -448   
-272   -192   
-48    240    
-160   208    
-48    272    
-128   -272   
-80    64     
-464   -96    
192    224    
288    288    
-256   144    
656    -112   
-2160  -720   
400    464    
736    688    
-240   656    
-288   -144   
-560   -336   
752    -1376  
176    -1344  
-368   640    
-304   144    
-224   -432   
352    -32    
256    -672   
-448   480    
-352   320    
496    -240   
-128   -80    
-32    -768   
-624   -608   
112    48     
256    176    
-208   144    
576    112    
-576   -384   
96     352    
16     736    
128    656    
416    112    
-112   816    
-80    224    
80     144    
-432   256    
352    832    
-336   192    
224    -368   
-144   -112   
-96    96     
256    144    
-176   -352   
80     -80    
-16    96     
144    352    
80     272    
192    1040   
-160   752    
16     768    
336    672    
-96    688    
176    384    
-272   256    
-144   656    
1424   176    
-848   -48    
-256   128    
256    112    
-32    384    
128    320    
-128   -16    
-48    -96    
96     112    
-96    96     
96     -16    
-128   64     
80     208    
176    432    
-368   304    
368    896    
-384   784    
112    80     
-64    368    
288    368    
-320   256    
160    32     
256    -32    
-64    -256   
-544   144    
448    384    
96     256    
-96    -48    
912    1472   
-2096  1168   
816    -304   
688    64     
-320   -160   
-240   176    
-64    64     
272    -16    
-224   -176   
256    -64    
-64    288    
-192   80     
400    160    
-112   -32    
-176   -368   
-48    -256   
-64    416    
208    -16    
-208   -144   
80     -144   
-224   192    
560    1040   
256    64     
-688   -224   
608    16     
-176   -304   
32     -16    
112    320    
112    192    
-256   160    
-112   48     
224    64     
-96    112    
160    32     
-144   96     
-48    -1888  
304    -128   
-144   -48    
112    320    
-96    112    
-144   32     
384    64     
-48    144    
128    96     
-256   112    
576    -64    
-576   0      
368    144    
80     -32    
-176   0      
-320   -848   
-192   864    
240    384    
-96    -240   
-464   -576   
48     304    
1024   144    
-176   192    
-48    48     
-32    160    
80     128    
-224   64     
416    160    
48     -48    
-608   -80    
432    -48    
224    144    
-256   -480   
208    -48    
48     -48    
-112   128    
336    336    
-1584  96     
784    128    
400    32     
-2096  160    
1408   112    
-208   -224   
-384   -176   
576    224    
-176   -256   
224    144    
16     -368   
-128   64     
-32    112    
-304   64     
256    -576   
16     144    
-112   160    
-32    128    
144    16     
-32    -208   
768    624    
752    -416   
-832   192    
1008   -208   
-640   -80    
192    -384   
96     496    
-144   -496   
416    -16    
544    64     
-208   368    
-192   288    
464    608    
32     -176   
-464   304    
448    64     
-544   32     
576    96     
32     -16    
48     64     
-48    -1360  
-80    80     
192    -176   
320    352    
432    -208   
-320   128    
288    -32    
-448   -576   
-224   -5536  
-1264  -640   
1424   384    
-320   -112   
368    432    
-80    -304   
-368   208    
112    -176   
112    -96    
576    -208   
-208   176    
0      16     
160    128    
-144   128    
352    -80    
128    208    
-64    -272   
-160   80     
-80    -720   
528    -1520  
16     -96    
128    464    
-256   64     
-368   64     
816    -704   
-464   -160   
320    -80    
160    256    
-368   0      
416    592    
-96    -1504  
128    -208   
48     -304   
128    0      
-96    -16    
-400   -464   
512    -272   
-80    336    
240    240    
-208   192    
16     -208   
224    -352   
-800   -544   
576    192    
-240   304    
96     16     
480    544    
-192   -240   
224    -384   
-160   -1248  
32     192    
-80    -720   
-160   -256   
480    272    
-496   144    
560    336    
256    2000   
-384   1504   
48     1536   
-272   288    
80     -128   
64     -112   
160    -208   
64     -80    
-176   -288   
224    16     
-160   -1936  
144    32     
32     -336   
-16    160    
208    -544   
-48    416    
-32    32     
448    -112   
-320   448    
128    -160   
128    144    
-480   -464   
240    160    
224    -448   
-112   48     
-128   -1152  
-64    -752   
144    480    
-48    160    
-32    64     
96     48     
0      288    
288    176    
-336   112    
-32    368    
-416   -64    
0      -176   
-48    -208   
112    112    
192    144    
-160   -208   
-368   16     
32     -400   
160    -96    
160    -96    
-336   896    
960    -208   
-1104  112    
464    -80    
-112   80     
-144   -192   
192    64     
-384   192    
-80    96     
192    16     
208    -512   
-16    64     
-64    -352   
128    112    
176    -144   
336    288    
-208   -96    
-224   -160   
192    -96    
320    96     
-192   288    
16     -16    
-288   32     
-32    -272   
304    -272   
160    -288   
96     240    
48     -288   
-64    96     
64     384    
1232   -400   
-2048  448    
1200   400    
704    832    
-1168  944    
480    608    
624    1504   
-848   528    
288    -32    
0      -896   
-96    -64    
160    640    
304    -672   
-256   288    
0      -176   
112    0      
-48    432    
-240   224    
0      -80    
32     64     
-1152  -160   
1792   -496   
-480   320    
-128   848    
496    976    
-240   -128   
144    1904   
448    1760   
-272   416    
208    -768   
64     -64    
-96    320    
-64    304    
-128   128    
128    -128   
-192   352    
0      -112   
-128   -16    
64     320    
448    448    
48     -432   
48     208    
-224   336    
528    608    
-352   -1232  
-288   -480   
-752   -944   
528    -768   
288    -432   
-704   -224   
592    144    
80     -16    
0      32     
-992   736    
-320   64     
-592   80     
192    976    
-336   -432   
336    976    
-672   496    
144    16     
656    192    
-848   272    
-336   -48    
-352   -64    
688    -224   
64     64     
-1120  64     
384    -112   
1776   2064   
-2160  448    
-48    -256   
1488   -1056  
-256   -1008  
-672   -560   
-160   -208   
512    768    
320    208    
-464   368    
-528   96     
80     -128   
464    272    
-160   176    
-416   0      
224    192    
144    -160   
-208   128    
0      -784   
-432   -16    
336    496    
32     320    
-304   -432   
-48    336    
528    32     
-1008  176    
208    -560   
-64    -320   
-16    -144   
128    64     
-64    -32    
-32    -448   
-64    224    
96     64     
304    240    
192    336    
-720   -224   
208    -192   
128    128    
-304   192    
-16    -48    
-544   -368   
432    -240   
416    96     
-432   96     
256    432    
-256   80     
-128   240    
384    144    
-224   192    
-208   96     
-304   -688   
160    -144   
64     496    
-512   0      
192    128    
464    0      
-944   -96    
192    544    
-336   32     
336    112    
16     128    
-176   -32    
176    -16    
-288   16     
112    512    
496    -32    
-336   80     
-160   560    
528    -144   
-208   224    
-160   80     
-240   -528   
64     -96    
112    80     
-80    592    
-336   80     
224    -80    
176    144    
-208   48     
960    3120   
-1824  -704   
-448   288    
1680   -112   
-784   -144   
-304   128    
144    576    
576    96     
-400   48     
48     -240   
-112   256    
-192   -96    
304    128    
224    400    
-608   -32    
272    0      
-32    384    
-64    -80    
-80    -32    
144    16     
-256   -224   
192    -720   
-704   416    
864    288    
0      -400   
-496   432    
-16    -64    
80     240    
576    -160   
-368   288    
-176   48     
-176   144    
304    -64    
48     -96    
-48    128    
-224   128    
272    304    
-32    -112   
64     -16    
-352   96     
176    144    
192    96     
-16    144    
-176   0      
320    176    
-496   48     
192    160    
16     112    
-16    16     
-272   -1024  
176    2992   
4992   2000   
-2000  -720   
-1168  192    
528    368    
688    464    
176    480    
-448   352    
1056   304    
-688   192    
32     32     
368    176    
112    16     
-112   256    
480    208    
-416   112    
144    16     
208    288    
-128   128    
240    176    
-16    176    
-560   -304   
1600   -496   
-480   432    
-384   -656   
-176   480    
448    -432   
-608   288    
176    96     
48     -48    
-224   64     
496    64     
-208   64     
-128   16     
272    176    
32     128    
64     16     
-144   -64    
-192   -144   
80     320    
64     64     
304    688    
-864   -64    
-384   224    
672    96     
-288   16     
272    0      
-176   240    
288    240    
832    -80    
-432   192    
64     336    
-480   416    
-80    -480   
800    96     
-400   144    
160    -16    
224    -16    
-192   192    
256    96     
-16    80     
0      48     
48     80     
-16    112    
48     368    
-400   160    
16     48     
272    64     
-208   64     
-272   32     
2048   -1584  
528    64     
-720   352    
-544   256    
496    64     
-224   272    
544    -64    
-320   64     
-16    -1392  
48     64     
288    80     
-384   160    
416    48     
-448   144    
384    -128   
-304   176    
288    -160   
-176   224    
256    672    
-48    1312   
192    528    
0      -160   
224    -32    
-576   -352   
832    208    
-288   208    
32     688    
432    272    
-240   -416   
400    -640   
-32    672    
-64    400    
-112   -80    
192    -32    
48     32     
64     512    
224    208    
48     336    
-64    -48    
240    0      
-576   -2928  
208    -304   
336    -112   
160    -848   
-256   -1024  
-176   -288   
-336   -496   
-432   -288   
448    240    
16     80     
-272   -192   
352    -672   
-864   272    
816    -704   
-240   -176   
-352   -864   
-64    -848   
464    720    
-64    528    
-288   -672   
320    592    
-176   -160   
32     288    
432    176    
0      0      
16     48     
0      32     
0      -160   
-48    -32    
0      128    
80     -496   
-112   96     
-16    -1072  
32     96     
96     176    
-336   256    
16     0      
48     -128   
48     16     
48     32     
-368   -224   
752    -752   
-352   432    
432    -272   
112    112    
-304   -48    
-240   -128   
752    -496   
96     496    
-144   464    
-96    -16    
0      -16    
96     192    
240    240    
-192   -368   
-128   176    
64     240    
416    288    
-64    -176   
-208   32     
416    -592   
-1184  160    
768    256    
-240   112    
352    -464   
112    528    
-352   704    
272    464    
-480   -64    
176    -160   
208    16     
32     -448   
-192   240    
-64    128    
80     112    
224    -64    
-80    -64    
-48    -1456  
144    -16    
400    48     
112    -672   
-352   416    
-256   -16    
432    -464   
32     -224   
64     -1360  
-144   -160   
-80    208    
272    -16    
336    128    
-1520  752    
2416   -1616  
-512   -128   
-592   -2176  
576    -272   
-64    -496   
-528   1280   
-384   128    
-320   -1728  
112    224    
368    -176   
-192   96     
-128   -32    
208    304    
96     -416   
-80    -416   
-48    -416   
64     -1168  
80     96     
0      -80    
608    -128   
-2288  -336   
576    736    
160    -1168  
-464   -1328  
480    -208   
192    1296   
-416   640    
-96    528    
224    -912   
-16    -272   
0      -16    
-240   384    
544    -64    
-256   -336   
-272   80     
288    -160   
-240   304    
784    16     
-464   16     
-288   -112   
-224   -528   
32     -80    
-848   -816   
384    -1280  
1072   256    
-800   96     
-96    896    
816    -496   
-560   -304   
-80    160    
208    256    
-144   192    
-48    -144   
-656   -624   
-768   432    
480    288    
-704   -80    
64     -176   
384    512    
448    -112   
-480   -384   
-80    -112   
352    -48    
448    848    
-624   -112   
-368   -16    
608    48     
288    -208   
-912   432    
-560   1856   
560    512    
-784   0      
-256   -432   
1088   -176   
-336   -112   
-1008  -640   
384    -320   
-32    208    
336    -64    
-304   48     
-208   -96    
112    -112   
-80    -128   
128    32     
-16    -32    
-496   0      
416    -144   
-496   416    
512    208    
-512   576    
208    -400   
288    -160   
-96    48     
-128   -144   
144    224    
-32    -144   
-32    160    
400    16     
-832   64     
400    144    
144    -16    
-608   -352   
544    -112   
0      -416   
-224   -176   
320    -64    
-96    288    
-96    64     
48     -176   
160    16     
160    80     
-288   160    
48     0      
32     48     
256    224    
-144   144    
-96    176    
144    96     
-96    -128   
0      160    
272    448    
1184   -128   
-1136  -240   
128    32     
320    64     
-48    48     
-208   0      
-16    -288   
-272   -112   
288    -64    
-240   0      
192    144    
-32    128    
-704   -272   
-16    304    
-1312  96     
32     -16    
368    128    
64     -16    
-336   -192   
-32    128    
-32    -32    
32     320    
-48    -352   
240    336    
-192   432    
-784   -336   
64     112    
-240   -64    
704    -288   
-2288  1664   
1104   -32    
224    464    
0      -16    
-160   -160   
-704   -64    
480    608    
-416   688    
400    -208   
-32    80     
-432   16     
16     -352   
272    112    
-416   144    
112    -144   
-16    224    
-80    352    
0      -240   
0      -144   
288    1088   
-864   256    
304    0      
352    -96    
-464   -64    
160    336    
-608   336    
192    -304   
512    64     
-224   -80    
-80    176    
-256   160    
288    -128   
32     -48    
-160   64     
224    0      
-32    16     
-144   -192   
-144   112    
224    96     
-1056  128    
-64    160    
256    96     
272    -48    
-80    -128   
-592   32     
368    96     
-128   176    
352    16     
-816   -224   
320    -176   
1184   -384   
-592   0      
-240   -144   
496    192    
-864   64     
464    208    
160    752    
288    256    
-304   112    
80     -96    
256    112    
16     32     
96     160    
-656   -16    
336    176    
-176   -96    
112    -176   
-304   96     
256    32     
-160   96     
-336   288    
752    -576   
-832   816    
-144   0      
-160   320    
256    192    
288    -304   
-128   336    
-176   48     
0      48     
288    32     
-80    64     
-144   48     
-240   320    
656    -128   
-16    176    
-576   96     
-176   -160   
384    -112   
96     -96    
-96    128    
320    -16    
-16    176    
-240   -592   
-448   528    
256    192    
-64    -96    
144    -64    
272    256    
-352   -80    
-496   -1072  
-208   352    
656    368    
-832   -208   
496    112    
320    144    
-272   -64    
16     32     
96     112    
64     32     
-64    16     
-144   0      
0      144    
-192   48     
176    448    
592    64     
-368   -64    
-512   -352   
752    -720   
-896   -2624  
-1472  -400   
384    32     
704    -352   
-144   -256   
448    -1216  
-272   -32    
-368   400    
-112   320    
448    -624   
-336   -560   
48     256    
-80    672    
288    64     
0      112    
-112   256    
-32    144    
-32    112    
144    464    
16     256    
-48    160    
-48    -48    
112    320    
672    800    
144    608    
-352   208    
304    576    
176    816    
160    -272   
96     -400   
0      -192   
-96    192    
-144   112    
272    -64    
144    720    
-176   368    
-64    240    
272    1088   
-224   288    
96     -368   
-416   128    
112    400    
112    272    
16     208    
-32    -32    
432    1328   
-464   896    
-96    -304   
272    -192   
80     -80    
-336   224    
-256   304    
1072   -384   
-384   -640   
-384   -96    
304    80     
96     144    
80     1152   
-32    368    
-384   -688   
256    -80    
160    144    
16     -48    
64     -48    
-224   96     
80     256    
384    384    
-272   736    
-96    -32    
240    96     
96     192    
160    -32    
0      0      
-32    128    
-48    96     
80     -432   
224    -64    
80     -112   
-352   112    
32     96     
288    128    
-400   144    
384    -192   
-848   -144   
320    -128   
336    192    
0      -96    
-672   192    
192    -240   
64     -80    
-64    224    
96     160    
16     -96    
48     80     
96     16     
-48    48     
240    48     
48     -80    
-144   192    
-32    -64    
-144   208    
576    -736   
-48    304    
560    -16    
-512   192    
112    -96    
160    176    
80     -272   
112    -576   
32     80     
64     112    
128    0      
144    224    
-208   464    
112    -112   
80     -96    
-160   -512   
-112   624    
544    512    
-304   -176   
-384   -64    
256    16     
192    160    
-32    256    
208    -656   
-176   48     
-384   0      
704    -16    
448    -160   
-736   16     
16     -1072  
-1504  -1776  
720    -528   
-416   -1904  
-528   640    
512    480    
-224   1040   
-592   832    
496    160    
-16    -176   
-208   -16    
16     48     
128    -48    
288    -160   
-160   -256   
-64    96     
48     -208   
-32    320    
192    80     
-160   256    
-208   -1040  
1136   944    
-256   -96    
-432   -464   
448    -512   
-32    -320   
-48    64     
32     0      
256    128    
112    -288   
-1088  352    
496    -96    
336    240    
-304   -368   
-240   -80    
80     -928   
336    288    
-160   -64    
-80    272    
240    48     
-80    176    
-32    32     
-112   -16    
960    -240   
-464   -32    
-160   -848   
-128   -160   
48     -672   
-96    -848   
384    16     
-16    192    
208    512    
-176   256    
80     0      
288    -32    
-496   -16    
-192   -288   
64     576    
304    144    
80     144    
16     112    
-208   -304   
144    240    
192    -112   
-32    160    
272    -400   
-96    -48    
720    -96    
64     48     
-912   -64    
-624   1968   
512    592    
-976   128    
-656   -432   
1120   128    
560    -592   
-1056  112    
384    -16    
-16    320    
416    -304   
-80    -368   
-256   -2752  
-160   256    
464    -1024  
-320   144    
16     -32    
-272   -96    
96     -208   
-64    -1088  
752    -96    
-912   304    
240    -208   
704    -112   
0      -208   
-352   -848   
448    208    
-64    -624   
-32    176    
416    -128   
-320   -288   
-720   64     
544    -672   
-96    -192   
144    -720   
80     -80    
-32    -272   
-160   -192   
144    224    
-432   -128   
176    -272   
0      112    
416    0      
-240   112    
-48    128    
496    48     
-96    176    
-272   -48    
-16    -32    
128    -64    
-192   -256   
112    -368   
-112   0      
624    -2336  
320    768    
464    32     
-304   176    
368    160    
416    352    
-448   112    
-32    112    
176    -16    
-96    96     
-608   80     
96     128    
208    -144   
-16    384    
-48    464    
496    144    
112    -176   
-192   -128   
64     112    
224    -160   
-368   208    
128    240    
80     112    
160    -1184  
-432   -224   
-96    448    
32     -528   
176    -336   
-848   -1584  
912    -784   
-288   -16    
-592   -144   
1136   -720   
-416   80     
-144   16     
-128   -288   
384    -80    
96     -112   
-464   272    
80     -528   
-272   -96    
160    -224   
-416   -80    
-112   320    
0      -32    
208    -528   
144    256    
-144   -1024  
624    1088   
-1232  400    
352    48     
592    -288   
-432   -32    
0      48     
-192   16     
-64    -448   
16     48     
48     176    
-448   -16    
144    224    
320    -448   
-128   144    
-192   -80    
-16    0      
240    -80    
176    -160   
-32    160    
32     0      
-112   48     
224    -16    
-432   16     
288    -80    
-96    48     
-336   -96    
480    -32    
-224   0      
0      240    
-768   -1952  
2304   864    
-384   -640   
-1504  -208   
1072   112    
-992   -272   
416    -256   
160    -224   
-256   352    
-160   -320   
-208   160    
320    -128   
-272   160    
-48    -144   
32     -48    
64     -384   
-160   64     
-352   -400   
240    64     
128    16     
-112   96     
32     320    
320    -848   
-1392  240    
416    -160   
400    -416   
-112   -32    
-368   384    
-304   -320   
-128   48     
-752   -112   
-352   32     
112    16     
-16    80     
-240   -128   
-368   64     
144    16     
128    -32    
-80    -176   
64     64     
-400   112    
-320   16     
80     64     
-480   -288   
96     16     
176    -544   
-80    -16    
288    592    
448    -208   
-464   -96    
-384   832    
448    16     
-896   288    
160    -48    
608    384    
0      -480   
-192   288    
-192   496    
-304   -112   
576    112    
-112   64     
-384   16     
-128   -80    
240    80     
-64    0      
368    1088   
-688   720    
112    48     
288    -368   
-640   -512   
-384   240    
-400   1600   
1600   288    
-592   -1024  
-496   -928   
1120   -128   
448    -384   
-400   544    
-512   1120   
80     -864   
496    896    
16     -272   
-544   -496   
0      80     
-464   -48    
432    592    
-224   208    
-272   -400   
224    64     
272    352    
-144   384    
-352   -64    
256    -176   
-144   352    
96     752    
16     320    
0      112    
32     32     
32     -48    
-192   144    
96     -368   
-64    32     
48     -144   
48     224    
-160   -16    
192    352    
-48    432    
96     -320   
80     -1024  
-352   0      
-64    352    
224    208    
224    -208   
-16    144    
-112   -144   
32     -416   
-768   -224   
112    -48    
128    640    
-160   -208   
128    -192   
560    896    
-816   288    
-272   336    
528    592    
112    1376   
-160   576    
416    368    
-608   -480   
112    -1232  
384    144    
-880   240    
-176   -80    
-112   192    
480    -48    
-48    32     
0      -112   
-544   -48    
176    64     
192    96     
-256   112    
32     96     
-272   32     
-112   288    
-272   -96    
256    -32    
144    -16    
144    224    
144    32     
-272   -160   
-144   -80    
704    -64    
-944   496    
432    -208   
-80    -272   
-384   288    
208    464    
608    80     
-688   336    
-240   464    
384    288    
80     -16    
-96    -112   
0      32     
-288   368    
128    208    
352    160    
-320   432    
-304   208    
64     144    
32     112    
-144   1072   
256    384    
-688   -192   
-96    -16    
224    352    
-80    112    
-96    800    
96     576    
-80    288    
48     -304   
64     -128   
-80    32     
-80    -304   
160    320    
-64    96     
0      -80    
0      336    
-80    -48    
48     304    
304    -80    
-176   160    
-192   -16    
400    160    
-64    160    
80     48     
192    48     
-144   112    
0      80     
256    -64    
-224   80     
752    -48    
-928   848    
992    464    
-640   -304   
-1008  352    
1584   432    
-592   480    
-64    320    
-192   -272   
192    32     
-96    80     
16     160    
32     64     
304    208    
-528   -32    
352    64     
0      304    
-80    464    
176    320    
80     -16    
16     448    
384    -832   
-1248  496    
1200   -112   
-272   144    
-864   96     
464    -112   
224    96     
208    -48    
-160   -80    
-128   256    
-320   48     
336    96     
208    208    
-160   -32    
-304   112    
416    192    
-464   96     
352    -48    
-208   -80    
64     144    
-32    64     
656    -272   
-432   400    
608    192    
496    -128   
-400   144    
96     496    
-352   640    
672    240    
-576   192    
-112   16     
-32    16     
272    112    
432    48     
-128   -192   
-320   -128   
256    -112   
544    -320   
-176   -144   
-80    352    
-192   16     
-112   -688   
624    176    
672    -192   
-640   -32    
-128   -80    
-64    192    
64     -64    
-736   1552   
2624   -1552  
-272   1920   
-544   -336   
-832   -192   
144    192    
592    -576   
-336   192    
-368   -208   
16     496    
576    0      
-256   112    
96     -32    
-96    64     
432    272    
-96    176    
-224   -16    
336    64     
-256   0      
-448   -496   
160    464    
-304   304    
160    144    
576    -64    
-416   -80    
336    336    
96     64     
-624   -128   
976    0      
-288   -32    
16     -32    
-224   48     
192    96     
-432   -192   
736    272    
-720   -96    
176    32     
128    64     
-192   -208   
-208   112    
208    -16    
208    80     
-336   -432   
-304   -32    
416    -1328  
-112   0      
208    624    
-160   400    
-176   416    
400    -144   
-272   64     
64     -192   
-272   272    
880    -368   
-320   0      
-32    -272   
416    288    
-128   -400   
208    -176   
-176   16     
-48    -112   
-176   64     
192    240    
144    96     
0      128    
240    96     
-208   -416   
16     -160   
96     -272   
224    304    
-208   64     
-48    176    
144    -480   
-144   208    
32     16     
112    144    
240    256    
-128   128    
32     -112   
144    320    
208    320    
-608   -2320  
80     592    
976    -224   
-896   368    
976    -80    
-272   -176   
-368   192    
-32    -112   
432    192    
320    368    
-544   -112   
128    -800   
-64    80     
368    -32    
-400   -128   
192    -272   
-176   -320   
208    16     
144    32     
-32    -32    
-272   -464   
208    -800   
-432   320    
560    -288   
112    -688   
-336   240    
96     -560   
352    496    
-32    176    
-432   -336   
-224   128    
176    -560   
192    -128   
208    -1504  
-64    -288   
-80    128    
-128   96     
256    -272   
32     256    
0      -64    
-144   48     
-368   -272   
528    -96    
-608   -128   
-80    48     
32     -48    
-16    -464   
32     -16    
-16    -400   
624    416    
-1504  -1968  
992    176    
96     -80    
-336   -192   
480    32     
-48    -16    
-224   752    
512    304    
-416   32     
304    144    
160    96     
-32    112    
-80    64     
112    -288   
-256   -272   
144    -1440  
-112   -32    
224    -96    
224    -160   
-144   16     
-256   -480   
1248   880    
-320   -384   
-688   384    
1328   -448   
-848   -128   
528    624    
400    768    
-240   -400   
32     -80    
-352   -288   
400    -16    
208    -160   
-208   176    
16     -144   
-224   128    
176    64     
304    448    
-320   720    
-208   144    
-608   -80    
208    -176   
208    -48    
880    496    
384    -352   
-688   -1040  
320    464    
-400   -2160  
-304   -128   
400    -240   
144    80     
-160   -368   
-176   -288   
-48    -48    
-416   -64    
32     -1152  
352    -240   
-576   496    
128    224    
256    576    
208    -128   
-144   336    
-32    -976   
-32    -96    
192    -112   
-256   -160   
-32    -256   
576    -320   
-224   -352   
224    -32    
704    1952   
-160   480    
-160   32     
544    -368   
416    -96    
-448   1456   
-64    1328   
64     -528   
320    -640   
-320   320    
64     -656   
-192   112    
240    -240   
128    32     
-272   448    
-288   800    
128    48     
48     -256   
-16    -144   
-32    272    
-256   -640   
208    -256   
400    128    
240    16     
-944   -48    
384    464    
96     64     
-32    -1312  
16     -144   
48     512    
-160   272    
-96    -384   
-144   -96    
64     400    
-16    912    
112    -64    
576    -176   
-528   128    
-992   64     
64     320    
-32    -16    
176    -208   
0      464    
64     352    
-48    -304   
288    -672   
128    256    
-288   224    
-384   -288   
-80    -240   
368    -64    
320    960    
544    624    
-864   -80    
0      -80    
288    -128   
-272   -32    
-112   -480   
-400   -1728  
16     -64    
-64    464    
80     48     
-16    208    
64     -192   
48     -32    
64     448    
80     320    
80     224    
-144   -176   
-64    144    
80     192    
112    96     
-96    -48    
0      -48    
-96    400    
272    992    
-48    752    
160    -720   
-48    -448   
-336   112    
240    1088   
-592   784    
80     -144   
304    -768   
208    -1168  
-64    320    
528    576    
-240   432    
-384   288    
-16    352    
80     32     
-576   -144   
32     -160   
-304   512    
-48    -64    
240    64     
160    -416   
-352   48     
-80    48     
96     144    
272    704    
-640   -32    
512    -256   
-272   816    
-416   -112   
64     16     
-416   304    
144    304    
-192   -112   
160    16     
-96    -192   
-128   64     
0      -176   
96     -80    
-288   336    
656    896    
-368   816    
-208   -288   
-64    -64    
64     -80    
-176   144    
-128   128    
352    32     
-128   80     
-128   -32    
-96    176    
304    -160   
16     144    
-96    80     
-192   320    
-512   2080   
1632   112    
-816   144    
-480   -432   
656    336    
816    64     
-1056  -32    
336    -48    
-1088  -32    
-560   0      
384    160    
-192   64     
-64    80     
-112   -32    
320    128    
-96    32     
304    128    
-176   176    
-144   16     
160    80     
-112   96     
-816   -592   
656    -464   
-592   -240   
-544   48     
-128   208    
64     32     
432    160    
-416   -144   
-64    32     
144    -48    
16     208    
208    80     
-256   48     
-240   80     
432    48     
16     400    
-336   -176   
-64    432    
544    256    
-176   0      
64     624    
96     -64    
-1184  -448   
0      176    
1120   240    
-320   144    
-320   -160   
496    -160   
-64    -192   
-416   208    
-208   112    
320    128    
832    272    
-448   480    
-864   304    
224    -64    
784    -32    
240    128    
-656   -48    
-448   -80    
240    -464   
176    -208   
-256   208    
-992   -256   
1008   -288   
800    144    
-800   -192   
-688   128    
-656   -2176  
1456   -912   
928    1120   
-2080  240    
-416   448    
1168   32     
784    -336   
-1376  192    
-288   -80    
672    400    
-32    208    
-272   64     
160    -160   
-272   208    
-128   144    
384    272    
-320   64     
-176   240    
688    -48    
-624   -432   
-720   16     
736    -112   
-336   368    
640    -96    
-704   -64    
416    112    
-64    64     
-352   176    
304    -16    
416    288    
-416   160    
256    368    
-176   32     
160    -112   
336    -128   
-176   48     
-272   240    
608    272    
-464   16     
-48    272    
64     64     
-64    32     
256    80     
-224   96     
240    80     
64     160    
-48    48     
112    80     
192    448    
-592   496    
368    208    
32     -16    
128    368    
288    -16    
-256   192    
592    240    
-272   -256   
-32    240    
304    192    
32     -96    
16     -208   
-208   192    
32     160    
0      208    
0      272    
144    208    
208    -96    
-192   0      
160    176    
-112   64     
-160   176    
96     -832   
48     -288   
-192   -960   
32     48     
96     208    
160    352    
-128   256    
-208   192    
48     0      
256    0      
-560   -2384  
288    240    
656    336    
-1488  416    
1104   -64    
256    -256   
-896   928    
48     0      
656    352    
160    -160   
-400   272    
96     208    
128    -32    
144    -432   
0      48     
112    944    
-32    896    
64     528    
48     560    
-192   96     
512    576    
-880   304    
928    -848   
-96    608    
-240   -544   
-208   -144   
384    -224   
128    544    
-64    192    
96     128    
-144   64     
96     -16    
-80    144    
-48    -160   
48     -208   
96     -16    
80     224    
160    -1008  
0      624    
16     -1168  
-144   96     
240    -16    
-32    0      
-176   0      
160    176    
-240   368    
80     32     
0      -160   
208    112    
176    160    
-1248  928    
2976   -704   
-592   -240   
-1088  -224   
1392   -160   
48     416    
-1008  1008   
544    -64    
-112   -1344  
-48    240    
160    384    
96     144    
-192   48     
224    -80    
304    144    
-128   208    
80     224    
16     -224   
-48    192    
144    -288   
720    272    
-2128  -736   
-192   448    
1888   288    
-1104  352    
128    976    
768    240    
-160   272    
-128   48     
320    -160   
-176   48     
-176   320    
128    272    
336    80     
-64    -320   
-96    160    
96     128    
-336   560    
656    -560   
96     -784   
-576   -704   
-160   -704   
160    0      
-496   -448   
928    1344   
-192   1568   
-768   -352   
800    -432   
16     256    
-304   -576   
96     -592   
688    320    
0      320    
-432   112    
304    -1440  
-720   -160   
592    -176   
-112   -2992  
-480   -272   
112    -1696  
-304   -224   
384    -224   
-192   -464   
-256   -80    
0      160    
208    -496   
512    320    
-272   672    
-144   304    
272    -128   
-512   -2160  
-2512  0      
1072   -336   
-1184  16     
432    -368   
464    -1072  
-864   -1392  
-720   -176   
480    0      
416    304    
-240   -1008  
-576   416    
416    -224   
272    -208   
112    -304   
0      -384   
-544   -96    
400    384    
288    640    
-320   -144   
16     -272   
240    96     
-128   -688   
-672   -1888  
896    48     
-480   32     
464    864    
-496   -928   
80     -752   
-368   -752   
208    96     
-64    -16    
16     336    
-144   -32    
-64    16     
224    -48    
-224   768    
160    112    
-64    -304   
-80    96     
496    -128   
-288   -688   
96     16     
160    640    
-16    -240   
176    -400   
-304   416    
0      -448   
-320   0      
352    336    
432    1168   
-848   192    
-32    -144   
880    736    
720    128    
-704   -1680  
256    -784   
-144   224    
384    688    
192    80     
96     -240   
-240   -112   
0      32     
-32    -528   
80     -320   
-640   -80    
64     48     
112    64     
-32    -224   
272    -912   
-32    -1760  
-48    -64    
-208   -384   
176    -32    
256    336    
-176   560    
-192   176    
64     -368   
-112   -288   
96     -256   
-176   -1296  
-1328  1280   
1104   64     
-192   -384   
272    320    
-80    672    
32     496    
-16    928    
432    -320   
-80    -208   
64     -640   
-368   -160   
128    0      
-32    640    
-48    16     
112    -432   
128    224    
-16    128    
16     -80    
-16    -32    
416    -912   
-576   672    
528    96     
-704   -160   
32     64     
288    -272   
-288   160    
16     112    
-192   336    
640    -144   
-544   -80    
96     -448   
-64    368    
240    -96    
-80    96     
96     -32    
-272   0      
160    352    
32     -16    
64     64     
-208   -112   
-96    144    
160    -80    
-224   192    
256    -112   
-32    192    
-80    -176   
-64    64     
-176   -16    
-592   -1408  
1632   -432   
-1776  -960   
-1136  272    
496    224    
-224   32     
-720   352    
-112   640    
64     32     
128    64     
-192   -192   
-80    64     
-304   -80    
192    48     
0      -272   
-240   -32    
16     96     
48     16     
-160   144    
48     -32    
-80    0      
-480   -416   
1008   832    
32     -32    
-704   -176   
-336   96     
560    -160   
-336   -416   
112    -320   
352    -320   
64     320    
-400   176    
-368   80     
384    48     
96     -80    
-64    144    
-32    -64    
-144   256    
-512   64     
16     -48    
736    -272   
-272   176    
-336   -1072  
-448   464    
880    -256   
-576   96     
704    -448   
240    864    
-832   112    
-208   -416   
560    -368   
416    80     
-864   -96    
-464   -112   
64     -176   
352    -304   
-144   -320   
-544   -144   
-64    160    
464    464    
320    -48    
-272   112    
144    -192   
-160   112    
-96    96     
272    256    
-112   176    
80     -96    
48     -32    
192    32     
-1792  -2224  
2336   -3232  
-480   272    
400    144    
48     368    
-848   -64    
528    16     
768    320    
-960   192    
208    -96    
-128   96     
32     0      
-160   80     
16     0      
128    -48    
-544   112    
368    96     
-320   -32    
-192   80     
-128   32     
480    416    
-608   400    
128    48     
416    128    
-224   0      
-240   -32    
128    16     
-288   32     
-64    -32    
272    128    
64     224    
-224   80     
-1024  -368   
-368   -176   
400    -32    
-288   192    
32     80     
-32    16     
-144   -128   
0      48     
-16    0      
80     -48    
-64    -32    
-128   -32    
32     160    
-368   96     
336    320    
-544   128    
128    224    
352    368    
-528   -48    
-96    -528   
400    -640   
-176   528    
64     496    
304    1648   
400    944    
-224   160    
-48    -48    
224    80     
-208   -400   
-288   -208   
560    -448   
-32    -240   
-304   -64    
64     -192   
-128   672    
288    240    
112    128    
-272   -272   
-96    128    
80     240    
160    320    
-160   -48    
-112   -144   
-160   -240   
112    -480   
176    -64    
32     672    
96     256    
-16    144    
224    -544   
-992   1520   
1056   -16    
-128   -400   
288    -48    
-288   608    
-96    160    
48     224    
-32    -80    
32     -16    
-48    320    
48     -352   
0      -144   
16     144    
-80    160    
48     -48    
32     -48    
-16    -128   
32     -160   
-32    256    
608    400    
-688   368    
16     -464   
448    416    
-432   -240   
-176   -256   
160    -592   
-320   -960   
192    -176   
224    96     
112    16     
-240   16     
-32    64     
-144   272    
224    -32    
16     48     
-144   64     
-320   -112   
352    304    
-48    48     
-192   32     
-144   48     
208    -144   
480    128    
-112   32     
-592   416    
128    64     
336    -128   
64     0      
-240   256    
-720   -1168  
-656   816    
912    -464   
-1408  -352   
480    144    
128    192    
-688   96     
336    -1184  
512    528    
-112   976    
-128   384    
128    -272   
-144   -16    
160    80     
112    80     
-112   -256   
-144   -64    
272    -352   
288    -256   
-288   304    
240    1072   
112    -928   
-912   640    
992    48     
-640   848    
416    96     
-80    336    
224    -1296  
-592   -1744  
-16    -288   
64     208    
-80    416    
336    352    
-192   560    
-80    608    
816    -2160  
-512   272    
160    1360   
208    1296   
80     1008   
-48    -96    
32     80     
-80    -176   
176    -16    
-848   -352   
272    0      
416    400    
-464   448    
544    592    
16     480    
-528   -16    
176    -32    
512    432    
224    464    
-736   16     
-144   -928   
320    32     
272    832    
-512   816    
-272   512    
432    0      
-192   192    
144    -160   
-688   32     
288    96     
400    -272   
64     96     
-224   -592   
-320   -192   
224    16     
-1184  752    
-480   144    
416    -320   
-480   32     
624    1200   
352    448    
-464   416    
80     112    
368    128    
352    -560   
-192   -224   
-64    240    
48     -1808  
176    -416   
64     -448   
-112   208    
-48    224    
-160   256    
448    512    
-96    688    
-144   176    
112    32     
352    -128   
-736   -1408  
-208   -48    
16     -720   
-208   464    
208    -400   
16     544    
208    32     
-192   592    
272    -32    
-192   160    
-160   16     
32     32     
288    -288   
80     -176   
-128   272    
64     -528   
-64    464    
368    416    
0      272    
-416   -432   
96     112    
96     208    
96     96     
-192   704    
528    416    
64     320    
-320   -512   
144    -16    
336    -928   
-1216  80     
0      -160   
848    64     
-48    -336   
-160   0      
-144   752    
576    416    
208    -224   
0      112    
96     272    
-384   -272   
32     -48    
416    -16    
-96    48     
-272   176    
400    272    
-48    -336   
32     0      
-48    80     
144    -112   
-272   -464   
240    192    
80     32     
48     144    
96     208    
-224   -384   
144    -336   
112    0      
1008   -624   
-3136  1184   
944    -832   
768    -256   
-192   -384   
-160   -224   
-16    176    
96     16     
-16    -608   
176    352    
-32    -304   
-544   96     
368    -480   
96     256    
-784   32     
240    192    
-592   80     
240    -176   
272    -112   
-80    -1344  
-48    304    
-224   -656   
-240   400    
1136   176    
-512   16     
-400   64     
208    -288   
32     96     
432    -176   
-800   128    
128    -160   
-112   -144   
80     -224   
496    -128   
-448   -592   
96     -144   
-32    -480   
96     0      
-384   96     
576    -80    
-320   80     
-112   64     
-80    -48    
96     -336   
256    -272   
-208   -96    
-672   112    
16     -96    
-112   16     
-160   -912   
400    -2048  
224    -1168  
400    48     
-736   -80    
-208   512    
1344   320    
-416   -288   
-16    -400   
464    -160   
-400   80     
-176   128    
-48    64     
144    -16    
64     80     
368    -160   
-384   -32    
208    -400   
128    240    
32     -1296  
160    96     
-208   -624   
880    48     
-320   128    
592    96     
16     -96    
-1056  336    
1184   -64    
160    416    
-928   -32    
-192   -64    
592    160    
80     -96    
-352   160    
128    -1312  
112    240    
176    -80    
-208   -16    
224    208    
-32    96     
-64    -80    
96     -176   
368    448    
-1168  -160   
560    224    
-480   176    
-400   -160   
560    -592   
1024   -80    
352    -112   
-624   288    
-144   160    
64     -48    
-144   96     
-16    -192   
-32    -304   
-112   160    
-128   0      
32     -496   
-480   448    
32     -64    
-320   48     
304    -224   
-48    64     
-192   -272   
-64    0      
192    -384   
-16    -16    
112    112    
-352   -96    
-336   960    
2176   -1520  
192    240    
272    32     
-960   -208   
416    208    
880    -32    
-304   -256   
112    80     
-608   -192   
-256   176    
208    -96    
-160   96     
0      -80    
-256   -48    
-48    0      
496    80     
-336   -16    
-336   48     
-176   736    
768    1440   
-256   1184   
-288   -96    
192    0      
-624   -384   
240    592    
336    -64    
-928   -144   
208    144    
64     -16    
-64    -80    
-672   -496   
192    -112   
720    -416   
-752   -112   
-352   -304   
176    -112   
-112   -560   
112    -128   
16     0      
-352   -80    
96     -176   
160    -384   
-272   -288   
112    -512   
-96    -352   
-1136  -272   
-208   -208   
-432   -400   
320    -192   
432    144    
16     944    
-384   -176   
-960   256    
544    -48    
224    -288   
-784   -48    
-64    -224   
-192   -656   
48     -784   
-16    704    
-208   400    
-80    -160   
-176   -176   
0      16     
-112   -448   
32     80     
-400   -256   
-64    -64    
80     48     
64     -96    
-176   80     
-64    32     
-208   80     
128    320    
48     176    
-96    160    
-16    1040   
-160   304    
-320   400    
-32    0      
496    752    
-336   640    
96     -368   
416    64     
48     -112   
-144   -160   
-48    -64    
-80    64     
16     0      
160    -16    
-240   32     
-112   128    
-272   -144   
304    144    
-272   -48    
-256   208    
224    -80    
0      112    
128    112    
-160   32     
-16    -320   
-592   192    
368    208    
192    64     
-208   352    
-64    -192   
224    464    
-736   816    
176    -32    
448    -224   
-256   -112   
-480   304    
288    -16    
192    -128   
-16    160    
-32    128    
-16    80     
-16    112    
-48    64     
176    80     
-384   176    
16     128    
32     64     
-80    -80    
144    -496   
-112   -112   
368    64     
-240   -112   
-256   720    
-48    512    
256    448    
2784   -1184  
-2000  -80    
400    -832   
352    -272   
-256   -624   
240    -288   
-1344  -1152  
-192   -1600  
112    112    
256    352    
-32    -80    
-288   16     
32     -256   
336    208    
-80    112    
-272   -32    
-112   448    
96     -192   
64     304    
-544   -912   
-304   640    
1680   -560   
-1120  400    
592    1648   
1184   1648   
-64    800    
-704   880    
976    1072   
32     448    
-272   0      
208    -320   
-32    -528   
-592   -464   
336    80     
-272   160    
352    736    
-144   528    
-288   240    
400    48     
0      0      
16     160    
-176   336    
672    1168   
-160   144    
-752   -208   
320    -1440  
-544   48     
-160   -96    
736    -336   
128    112    
128    416    
-736   336    
96     400    
48     -32    
-592   -624   
416    -464   
-432   -448   
-144   64     
368    160    
-112   0      
-128   -80    
176    -304   
-96    112    
272    112    
-288   128    
-304   16     
-160   -352   
912    -928   
320    1520   
-256   816    
656    48     
1168   -96    
-1008  32     
-400   1376   
848    64     
-192   -128   
-144   272    
144    176    
-352   608    
224    -32    
304    64     
-320   64     
16     416    
-192   -112   
304    240    
-160   -64    
560    560    
-656   -64    
64     -448   
400    -560   
-208   272    
240    64     
192    32     
-384   384    
256    64     
-352   -336   
640    -688   
-400   -464   
224    -160   
-48    -176   
208    -288   
32     -80    
32     144    
-48    352    
208    80     
-80    32     
-32    -16    
-144   80     
-32    -16    
-80    -64    
432    -576   
-80    192    
224    96     
112    192    
32     96     
128    -64    
-160   48     
96     352    
512    240    
-256   48     
224    528    
720    112    
-336   -48    
-96    672    
480    384    
-64    -224   
-32    96     
-656   -176   
560    64     
256    16     
-176   256    
-64    272    
16     208    
96     32     
48     400    
288    -176   
-192   0      
-320   208    
496    -80    
-48    0      
-144   -464   
-112   80     
160    32     
128    -64    
0      64     
128    48     
-160   64     
-16    112    
-464   -1232  
1776   272    
-528   352    
-768   -128   
592    -688   
-496   160    
416    -192   
-80    112    
304    -400   
-432   -256   
336    -32    
272    -1168  
-80    224    
-224   112    
320    -64    
96     448    
-176   64     
-16    -96    
144    176    
-16    -32    
48     -16    
-208   960    
1248   -320   
-704   -272   
-592   64     
848    144    
-256   -416   
-48    128    
-48    -224   
160    32     
-112   96     
384    -48    
-80    192    
-128   112    
224    272    
-16    -112   
-384   480    
640    -112   
-176   112    
208    -752   
-304   160    
480    -208   
-240   208    
368    0      
-176   -64    
-128   160    
448    64     
-304   176    
352    112    
-80    96     
-1232  -3328  
32     -816   
1008   -992   
-1232  224    
304    -192   
240    192    
208    80     
-784   592    
560    336    
448    160    
-144   16     
-304   80     
96     112    
144    -16    
-208   32     
256    -64    
-288   48     
240    -16    
-64    240    
-64    48     
64     176    
512    304    
-1264  -144   
-16    176    
288    32     
-128   -256   
464    -432   
-384   -48    
368    448    
576    -384   
-288   -256   
-32    160    
32     -96    
64     128    
96     -80    
240    0      
-528   -288   
160    -672   
-80    -384   
48     -48    
96     224    
-144   -512   
544    -368   
-544   -416   
-544   208    
592    -16    
64     704    
-432   -368   
-208   -1200  
464    -32    
-304   -64    
-16    64     
224    128    
64     32     
32     -144   
0      -80    
160    -240   
-128   -160   
-128   112    
576    -80    
-704   -16    
336    -384   
352    -176   
-64    240    
-240   -64    
-48    -128   
176    16     
-32    64     
-192   32     
64     768    
2016   2848   
-1952  1792   
-240   448    
2224   -256   
-912   -320   
-832   48     
544    -96    
448    -96    
176    -448   
-320   0      
-176   0      
192    -16    
256    -224   
64     256    
-464   16     
128    272    
304    0      
-144   64     
-304   144    
80     592    
-1072  208    
160    -80    
-352   -560   
160    224    
192    -288   
96     176    
352    144    
-144   208    
96     832    
48     816    
432    -368   
-32    -96    
-128   320    
-240   368    
96     -96    
-16    -112   
-352   -128   
736    144    
96     752    
32     432    
80     -848   
32     48     
192    -2656  
-48    -224   
448    -640   
-240   -144   
80     1152   
80     736    
-432   -768   
560    -672   
-240   160    
0      -432   
-2000  416    
864    240    
-832   -480   
352    -672   
112    -400   
-64    -80    
96     -176   
-80    272    
-96    -80    
112    176    
48     -32    
-208   32     
96     -112   
-144   -544   
464    -512   
-64    272    
-144   0      
160    144    
64     -160   
80     48     
-48    -640   
-48    -64    
-256   -160   
160    80     
96     48     
-128   -16    
-144   -32    
-80    -16    
240    64     
560    -48    
-1408  368    
640    -128   
-208   304    
304    -464   
-112   48     
16     592    
-32    304    
48     -160   
-64    0      
-208   -32    
-144   -96    
-80    -32    
240    -64    
-272   128    
-240   368    
-192   32     
336    -496   
160    16     
-416   -160   
-672   112    
336    -208   
-736   -16    
96     -112   
-304   192    
-32    176    
288    16     
-688   -400   
-16    416    
192    80     
0      -304   
-48    -16    
-320   224    
-16    304    
-64    -192   
208    64     
-256   -304   
-496   -80    
272    128    
-336   192    
-112   96     
-448   16     
112    272    
-32    96     
192    112    
-576   -208   
-32    -48    
16     -256   
656    -448   
-384   -1408  
1984   -976   
-832   496    
432    384    
-256   384    
-656   176    
-176   -256   
192    -1392  
-560   -736   
-288   1680   
-96    688    
80     -464   
448    -160   
-288   176    
-288   288    
208    -144   
32     -256   
80     448    
0      432    
0      496    
80     -16    
-528   -976   
256    -368   
480    -560   
-1280  -800   
720    112    
192    1104   
512    480    
-592   -192   
400    288    
48     192    
-272   16     
0      -240   
320    96     
32     0      
-304   48     
432    32     
-224   240    
16     -96    
-16    16     
224    96     
-432   -48    
-48    416    
288    -16    
608    -240   
208    -608   
-576   240    
240    48     
0      -144   
-128   480    
16     -448   
-272   304    
528    96     
-304   48     
-496   -48    
-48    -320   
-16    -400   
720    -368   
-720   0      
80     208    
288    -48    
-96    -96    
-432   80     
-144   -336   
-304   256    
416    -48    
-624   -96    
-112   80     
16     -32    
-640   -528   
2192   1744   
-1840  1136   
-144   224    
1664   -320   
-496   128    
-944   -48    
160    384    
896    64     
16     -32    
-368   112    
-32    0      
64     240    
-176   -96    
400    80     
64     64     
-288   144    
-224   144    
304    32     
-416   -80    
528    -688   
-576   256    
544    48     
-496   16     
368    16     
304    -112   
224    0      
-352   -112   
-48    -32    
304    400    
-352   96     
528    192    
-368   -32    
-64    96     
112    336    
208    224    
112    48     
-112   144    
144    128    
-128   368    
-160   0      
224    64     
288    80     
-576   112    
160    288    
-448   -32    
272    96     
224    64     
96     592    
-80    240    
16     432    
672    176    
-192   400    
-96    0      
-448   16     
976    -112   
-272   -160   
-256   -256   
224    -256   
-208   352    
144    -80    
-48    64     
-80    -32    
-16    240    
128    496    
-16    144    
16     -32    
96     -224   
-48    208    
-176   288    
-48    32     
112    -32    
48     -64    
-176   -48    
-112   208    
160    -144   
-288   128    
192    32     
-96    112    
112    64     
-32    208    
-560   -1040  
1216   -1152  
-720   480    
496    -208   
-144   160    
-208   368    
240    -144   
336    752    
-160   320    
-512   -144   
368    -16    
96     176    
96     112    
-48    160    
48     288    
128    48     
-144   -48    
144    192    
-80    32     
-48    128    
-48    224    
144    1184   
1136   -240   
-976   -48    
-224   -48    
688    -2432  
0      272    
144    240    
-480   240    
-80    -192   
352    32     
128    32     
-80    352    
-160   48     
-32    -128   
32     -64    
400    16     
-608   -176   
288    192    
80     -64    
-144   -976   
224    32     
-176   80     
64     128    
432    16     
-496   48     
32     160    
160    160    
96     32     
-160   112    
128    384    
-1200  -224   
896    224    
-352   128    
-320   112    
624    144    
-128   -208   
-384   96     
400    80     
80     80     
32     48     
-112   48     
64     144    
256    64     
-432   32     
448    32     
-304   112    
-16    -144   
256    -240   
-48    -64    
32     -16    
0      -416   
-1072  656    
1200   48     
-480   96     
-240   288    
496    -64    
-384   32     
-384   416    
-80    -32    
272    -112   
208    160    
-160   -48    
-96    128    
128    256    
-16    -320   
-48    224    
96     16     
576    -160   
-208   368    
-96    224    
384    80     
320    -704   
-848   608    
352    176    
192    -208   
-736   352    
112    -32    
448    -112   
176    128    
-240   -128   
-48    192    
192    -96    
96     -80    
-80    -768   
496    512    
160    -208   
-848   240    
400    0      
-640   0      
304    -160   
128    224    
-96    -16    
288    -96    
-96    128    
128    -416   
-688   224    
80     -496   
304    -144   
-336   -144   
1616   2160   
-2272  880    
144    112    
2400   -240   
-1648  -96    
-400   208    
32     -640   
-80    48     
-128   256    
80     160    
624    -48    
-240   384    
-32    304    
0      304    
-144   -480   
416    304    
192    -592   
-448   -16    
160    -448   
48     -528   
-80    -336   
-64    -64    
-224   224    
592    208    
96     1088   
-16    544    
-64    400    
-64    -192   
176    -96    
160    -224   
-176   336    
128    48     
-272   -144   
80     -240   
272    96     
48     -96    
-608   -640   
368    -720   
64     -480   
-80    128    
64     -128   
-400   32     
48     -464   
144    -272   
-48    656    
32     560    
-368   -160   
656    896    
-160   624    
256    -176   
-224   -496   
-96    240    
800    -1696  
-528   -592   
32     -368   
512    -352   
448    640    
-336   880    
80     -272   
160    -704   
112    -736   
80     544    
-112   -384   
0      144    
256    -528   
-48    -416   
-336   -32    
256    -688   
192    -32    
192    -272   
-80    -64    
-144   -688   
240    0      
16     0      
112    32     
16     -240   
-288   -48    
384    -624   
368    96     
-384   -64    
-16    -96    
-576   960    
720    -160   
-560   32     
48     112    
192    -336   
-144   -176   
448    80     
-144   256    
-112   -64    
192    -144   
176    112    
-112   80     
-16    16     
48     48     
192    144    
-384   160    
0      -192   
128    -544   
48     -496   
512    464    
-544   672    
240    -304   
576    -224   
16     160    
-112   176    
-368   96     
320    -896   
464    -64    
-144   80     
-224   16     
32     80     
0      -80    
-448   176    
-32    48     
48     304    
-288   -368   
-112   -208   
320    320    
304    -32    
-736   -784   
-64    608    
176    336    
288    -448   
-208   -64    
-80    -144   
176    -128   
-64    80     
-16    -32    
-256   -80    
-1264  -1040  
-384   736    
1280   -544   
192    -368   
-2400  1072   
1664   -1376  
64     -48    
-1584  544    
624    16     
48     -64    
-304   192    
-32    80     
112    -16    
-304   -96    
128    -112   
16     -64    
-176   -368   
80     -224   
160    -256   
-16    96     
-432   -960   
1488   -48    
-1424  -16    
288    -80    
544    -96    
-832   -48    
480    576    
640    -144   
-160   -128   
-32    -16    
-144   0      
32     -112   
80     64     
64     -80    
608    128    
-176   -672   
-224   -176   
240    160    
448    -32    
-240   0      
-112   -16    
-208   -160   
-592   464    
160    -128   
-32    -336   
-544   -48    
224    112    
64     400    
-768   96     
144    160    
416    -400   
-16    -160   
-240   96     
-272   -80    
-32    -32    
112    208    
-240   -64    
608    -192   
64     144    
-384   32     
-640   -16    
96     -176   
256    128    
-1216  -224   
-416   -288   
1008   64     
-144   -64    
-448   112    
64     -496   
-128   960    
1408   2720   
1168   -352   
-1984  -176   
-368   -208   
1120   -192   
400    192    
-976   -384   
-112   368    
-80    -144   
192    144    
352    -16    
-432   96     
-48    -208   
-144   144    
-80    -16    
-16    288    
224    16     
-48    -64    
-176   -480   
-912   -224   
960    -176   
-656   144    
896    -128   
80     16     
-544   -16    
-352   224    
1104   96     
-1136  -48    
320    272    
-80    48     
-80    192    
-32    -16    
-832   -48    
-80    -224   
-384   -96    
336    -32    
192    128    
-112   96     
-368   -128   
64     16     
-80    64     
192    64     
-80    416    
32     336    
-240   224    
-80    -48    
224    -208   
-208   -112   
-112   -48    
160    -32    
80     48     
-224   208    
912    48     
-512   -176   
128    -512   
304    48     
-256   208    
-192   224    
16     272    
16     -112   
-192   128    
96     240    
-240   -48    
-48    -112   
-144   -256   
96     912    
-736   576    
304    -368   
560    -128   
-144   256    
-224   -80    
-80    -96    
16     160    
208    96     
96     96     
-304   -192   
-192   96     
128    512    
368    32     
-304   -384   
-224   -1952  
-1136  1680   
1584   80     
-624   688    
544    -48    
-256   -144   
-224   352    
-304   -448   
320    352    
224    208    
-352   80     
-224   48     
0      -16    
512    256    
-864   704    
304    -416   
-288   -16    
352    384    
0      336    
-320   -80    
288    560    
-480   -304   
-320   496    
976    48     
-144   16     
-608   160    
32     208    
176    16     
-16    -160   
-144   -368   
-176   224    
112    32     
-48    272    
192    -112   
-80    192    
-160   64     
48     80     
480    -96    
-336   96     
48     48     
-224   112    
128    176    
96     32     
-64    176    
-224   16     
368    144    
-160   16     
-176   64     
176    160    
176    384    
-880   2448   
2960   288    
-1360  736    
-576   -96    
1712   400    
-1392  80     
-64    320    
560    304    
-64    144    
-224   -16    
-192   16     
-16    -96    
144    64     
0      96     
48     48     
-96    256    
240    16     
272    224    
-368   96     
-80    144    
32     128    
80     848    
1808   -240   
-1616  256    
352    -32    
752    112    
-480   512    
960    -48    
-304   96     
208    96     
144    208    
-48    32     
192    96     
32     0      
-224   32     
-80    96     
400    64     
-176   368    
320    112    
112    384    
-192   160    
0      16     
368    -672   
-160   608    
432    -304   
-576   144    
752    1296   
832    0      
-592   -432   
192    272    
16     16     
128    32     
144    -192   
112    496    
-400   160    
-432   0      
1008   512    
-736   752    
-176   -192   
480    -336   
320    112    
-128   -48    
-432   -32    
224    80     
352    208    
160    -240   
-688   -96    
80     -288   
672    -3568  
-256   -80    
128    496    
1120   -560   
-384   -1056  
928    560    
144    672    
-976   -80    
128    -848   
864    -1024  
-384   -336   
-368   -224   
0      800    
592    208    
256    16     
-208   -784   
-272   176    
448    496    
112    480    
-32    -64    
80     16     
0      16     
-176   -192   
-48    -176   
192    -80    
64     144    
-400   48     
160    -704   
96     -496   
128    816    
160    208    
16     -288   
160    -80    
-96    416    
-192   -16    
-16    -48    
96     416    
48     784    
-80    -32    
144    400    
176    848    
96     144    
64     -288   
-496   -64    
240    336    
176    -400   
272    336    
-144   -1120  
-304   -32    
224    -448   
304    64     
-80    480    
-144   208    
-560   -560   
688    -928   
-32    -688   
-48    96     
176    528    
64     -16    
-80    656    
-320   -32    
272    -16    
304    -224   
-128   96     
64     -272   
0      112    
16     224    
80     368    
240    128    
176    -336   
128    -512   
128    656    
-192   -48    
-144   -176   
368    -48    
-208   16     
-32    -192   
-272   -576   
192    -160   
320    -896   
480    96     
-816   400    
192    64     
-160   832    
304    -240   
-256   -432   
224    -288   
-560   -416   
272    512    
80     1056   
144    96     
128    64     
-224   -976   
240    240    
160    -1904  
-80    32     
-48    -16    
-32    208    
240    480    
320    96     
16     16     
-240   80     
0      304    
256    1056   
656    176    
-1040  -192   
192    -1088  
432    -512   
-304   0      
256    -64    
-128   256    
32     -96    
224    112    
256    0      
-208   -496   
-144   240    
352    48     
-64    368    
-96    48     
-32    208    
-32    -16    
48     -144   
352    -592   
-128   224    
-192   -208   
304    32     
-288   144    
496    48     
-240   128    
304    0      
-48    96     
64     -720   
-736   -2000  
2096   -144   
-624   256    
-800   -144   
1408   112    
-880   288    
-144   528    
576    -240   
-464   -2464  
-48    -320   
-96    -1296  
432    176    
144    -112   
-32    -352   
-576   -80    
496    -640   
16     0      
16     -560   
16     -32    
112    -48    
64     -16    
512    544    
-1792  144    
784    128    
-64    32     
-128   -16    
288    192    
-608   0      
160    -240   
16     -368   
-336   -240   
192    112    
-48    -240   
16     0      
240    -736   
-192   32     
768    -464   
-400   48     
320    -48    
496    -48    
16     -64    
-16    160    
-384   288    
-80    -112   
-464   192    
384    -16    
-160   176    
-112   48     
128    -144   
288    -272   
592    -160   
-64    -304   
-640   64     
128    16     
704    -96    
-304   -464   
-96    288    
-192   224    
-80    -416   
448    -464   
384    -464   
-256   -192   
-128   -320   
352    176    
240    112    
624    224    
-1008  -320   
-128   176    
224    16     
-384   -512   
2528   2208   
-1920  1872   
448    0      
1888   0      
-1776  -384   
-288   -112   
704    -416   
288    -464   
-48    -64    
-128   -240   
256    16     
432    -448   
-496   528    
64     -48    
-32    48     
64     16     
80     160    
-240   32     
-384   -352   
512    816    
560    -112   
-1344  208    
448    144    
-368   64     
-64    -304   
512    224    
160    -160   
-288   576    
128    -448   
16     464    
336    -144   
-448   288    
336    -320   
-352   -48    
-80    -80    
16     96     
-64    96     
64     -144   
-560   -32    
240    48     
-80    96     
112    -48    
-32    80     
32     -640   
-96    -208   
-128   80     
-256   -32    
-32    -32    
416    -224   
-288   -96    
16     -48    
-368   -384   
640    -160   
320    -144   
-32    0      
-704   656    
208    -32    
32     -368   
-16    -1136  
-32    -192   
-400   -16    
480    -64    
48     -16    
-112   240    
-192   48     
112    64     
176    0      
-400   192    
160    -560   
-400   0      
192    208    
128    -400   
208    -192   
-160   -112   
-736   176    
-80    -192   
208    -192   
144    416    
-160   144    
-144   -80    
80     80     
640    2848   
784    32     
-1520  432    
-80    -768   
192    368    
144    32     
-512   -32    
336    -736   
-432   -176   
272    288    
-128   160    
-160   -304   
-784   160    
96     -480   
176    -48    
-96    336    
-80    64     
-176   320    
32     -304   
128    0      
544    624    
-1360  464    
800    224    
-128   -64    
-208   1088   
512    528    
-528   -112   
0      368    
112    128    
16     -208   
-416   -112   
144    -176   
-64    224    
144    -16    
-128   32     
-480   176    
112    64     
256    -128   
-176   -272   
-96    -112   
-288   96     
64     -32    
176    128    
-96    -176   
-496   -176   
160    160    
112    -32    
-16    112    
-256   -176   
-336   -592   
240    -64    
432    -816   
-448   -320   
592    432    
-704   80     
-320   96     
96     80     
192    -416   
-208   -224   
-400   -368   
256    208    
208    -96    
-368   -208   
432    -544   
64     -240   
-304   16     
240    320    
112    400    
-48    496    
128    432    
-224   64     
960    16     
-2352  -160   
1376   -848   
608    -64    
-1232  496    
-784   -832   
576    -992   
224    -416   
-848   -32    
112    32     
64     -64    
80     -64    
-64    -160   
-112   -96    
160    -32    
-224   -432   
464    -976   
-448   -624   
-80    -304   
64     80     
-368   240    
-144   -352   
160    -592   
96     -592   
-816   144    
672    0      
304    832    
-96    -320   
80     -128   
-176   -352   
-208   128    
-64    -272   
-640   288    
656    -736   
432    128    
-688   464    
336    336    
-640   -112   
112    64     
16     -144   
-416   -16    
160    16     
432    96     
-144   -192   
-352   -608   
64     -320   
-160   176    
-48    176    
-32    80     
-576   -1696  
-1648  -16    
864    160    
-400   272    
624    1312   
64     416    
-496   -320   
80     -1696  
-32    784    
144    -256   
-368   128    
-416   -80    
176    336    
240    64     
-352   208    
64     -128   
-544   -160   
-32    240    
336    384    
-144   304    
0      48     
240    400    
-544   240    
192    640    
240    496    
-32    144    
-576   -16    
384    -128   
112    -304   
-16    -32    
-144   240    
-368   80     
240    368    
160    -64    
-416   -320   
304    832    
304    1104   
-224   272    
-96    1360   
224    160    
96     -48    
224    176    
-208   352    
32     80     
-128   -144   
336    -32    
288    1072   
-400   544    
-352   -784   
752    192    
192    560    
-240   -176   
-1072  -784   
464    -960   
368    -992   
-640   112    
-80    -784   
-336   -48    
496    352    
-64    -400   
-80    -912   
-192   -96    
16     256    
192    48     
-96    -128   
-32    304    
176    576    
192    480    
-144   448    
96     -96    
-48    -80    
-96    272    
192    -32    
-64    224    
-48    736    
176    -992   
-304   -160   
336    -96    
448    0      
-96    -16    
-192   -1056  
-832   864    
816    -320   
320    -128   
-16    1184   
-192   48     
-160   64     
176    336    
96     0      
16     -784   
-176   -688   
0      48     
144    608    
80     432    
-144   208    
80     416    
368    112    
64     144    
-64    208    
-16    272    
-144   -464   
544    -1152  
-400   512    
224    272    
-144   160    
240    720    
240    192    
32     816    
192    144    
-16    0      
-16    16     
-96    -96    
-48    192    
112    32     
-208   208    
32     -32    
320    -64    
0      -80    
-144   80     
48     144    
304    -112   
-112   16     
80     336    
-80    -144   
-144   192    
656    64     
-192   160    
32     16     
-208   192    
-448   -432   
1376   64     
544    96     
-1120  0      
208    -224   
752    192    
272    160    
-416   224    
608    -1184  
32     -64    
-368   160    
368    128    
64     96     
32     288    
-128   -240   
-64    256    
224    0      
-160   128    
-304   0      
336    -16    
-176   -16    
0      -400   
656    800    
752    -912   
-656   512    
672    -1376  
-272   224    
-192   240    
128    16     
144    16     
-64    160    
-208   80     
-176   32     
192    112    
224    -208   
-48    208    
64     -144   
128    320    
-16    240    
160    80     
320    -2096  
-112   -48    
-416   -1488  
240    592    
800    352    
-1664  -112   
-176   128    
400    -352   
-1184  -16    
208    -336   
672    304    
-192   192    
-576   400    
-208   64     
432    -16    
-32    -112   
-32    -192   
-544   -192   
96     80     
-192   -64    
688    32     
-480   0      
-160   80     
112    416    
304    -144   
-16    256    
-96    -352   
-208   80     
688    -352   
-352   176    
-1488  -2000  
2592   -1856  
64     1440   
-320   224    
-832   176    
304    272    
752    -192   
-608   96     
-96    48     
80     -208   
560    192    
16     -416   
-32    64     
-32    -64    
272    80     
224    -352   
-112   160    
-16    32     
128    -1232  
-448   -640   
272    -16    
-304   -336   
80     80     
640    -1440  
80     -192   
-128   -208   
160    0      
-48    -64    
-336   -240   
320    -192   
48     -80    
32     -240   
-16    32     
-256   -144   
272    80     
-144   -16    
256    -240   
-544   -336   
224    -272   
272    224    
-304   -464   
-32    -144   
432    -32    
-240   -96    
144    48     
48     16     
-192   -192   
-112   32     
320    -384   
-112   -192   
-112   -80    
-160   -368   
80     -624   
-224   80     
752    -16    
-256   -16    
-384   48     
496    880    
608    656    
-80    336    
-192   32     
16     48     
32     48     
128    -112   
16     -112   
-224   0      
240    272    
-224   144    
128    112    
64     592    
96     272    
-144   256    
480    -768   
-208   224    
-32    -208   
160    -16    
256    -176   
0      128    
-256   112    
96     64     
-16    -48    
-32    -2224  
-320   192    
240    -48    
-1264  240    
544    -384   
-192   64     
192    -768   
64     96     
-16    -48    
144    128    
-96    -176   
-160   -48    
176    80     
208    160    
-272   512    
176    32     
-224   -160   
-64    -48    
-688   -416   
96     208    
512    560    
-960   944    
400    -720   
96     -1248  
224    592    
-64    128    
-192   80     
144    0      
176    112    
-96    -224   
-208   -240   
-224   128    
288    224    
-32    -192   
-256   -192   
-480   -32    
432    -240   
0      896    
128    -1424  
64     80     
-112   112    
-144   -32    
144    -48    
272    16     
-208   352    
-16    -32    
-176   -240   
336    80     
112    576    
-160   208    
-1008  -928   
960    -240   
992    -528   
-1888  688    
976    48     
176    -864   
-544   0      
224    -48    
-112   128    
64     -208   
-96    48     
-112   96     
-128   -192   
256    -336   
112    144    
-304   -32    
-64    16     
336    224    
-304   208    
48     208    
-192   -736   
1456   48     
-1872  368    
96     -880   
848    -432   
-80    848    
-208   560    
432    -1392  
0      -1984  
-352   1024   
272    1264   
-368   -400   
64     -464   
384    -112   
-304   800    
-400   144    
-320   32     
192    592    
-800   -48    
-96    112    
-160   160    
240    176    
208    -224   
-128   -224   
496    624    
448    464    
-864   -2240  
-112   -512   
-224   -816   
-256   224    
592    224    
-304   -32    
544    160    
-128   -176   
16     288    
256    -176   
-528   -544   
896    -1152  
-448   32     
224    -112   
-208   64     
0      -384   
528    816    
-352   816    
80     384    
-368   672    
-192   -48    
-112   32     
-144   48     
240    144    
1184   2272   
-1136  848    
-1696  -176   
1472   -512   
256    848    
-544   928    
-112   -96    
176    -112   
352    -176   
-112   -464   
-32    256    
-176   -48    
96     -192   
-112   -112   
-176   16     
-32    0      
48     -48    
-272   -608   
-176   -752   
-192   -624   
48     16     
64     80     
272    608    
416    0      
-736   704    
432    -624   
-112   -288   
-96    -656   
112    -240   
0      -288   
-480   672    
224    544    
-16    -96    
-80    -464   
-480   32     
304    -112   
-496   -496   
256    -64    
-128   -464   
-144   -64    
-128   80     
112    -64    
-240   112    
-80    192    
112    1168   
320    432    
-192   160    
-112   448    
368    48     
-480   -720   
-96    -176   
-336   800    
912    -288   
-96    -640   
-464   -736   
-608   -768   
64     -736   
-336   -656   
-80    -688   
-48    -928   
-368   -432   
48     16     
-224   -80    
496    288    
-336   -64    
-272   96     
-16    -160   
80     -288   
-96    -496   
-144   -256   
-48    80     
-48    176    
128    240    
-64    144    
288    368    
16     128    
-448   432    
656    1088   
-240   1264   
-192   400    
1024   2240   
-1376  384    
368    -256   
880    256    
-224   -160   
-224   480    
-304   -64    
448    352    
-192   48     
-48    32     
-80    -48    
-160   352    
96     80     
240    -64    
-640   320    
272    -16    
-128   368    
-32    16     
-32    -112   
96     160    
-80    224    
-496   -1008  
288    96     
752    32     
-1616  64     
880    288    
304    96     
-352   -48    
-352   -64    
192    -304   
240    32     
48     208    
-16    208    
48     192    
-144   48     
96     192    
128    176    
208    -16    
-192   64     
112    48     
-48    112    
144    -16    
-48    160    
208    -48    
-176   -32    
0      -32    
-32    64     
352    208    
-128   128    
-112   -48    
-496   -1696  
-736   -224   
1056   304    
-672   256    
512    352    
-416   -96    
848    240    
-688   320    
-352   64     
336    48     
192    48     
-64    32     
-160   112    
256    416    
-112   80     
-304   256    
480    -32    
-512   176    
256    0      
-96    80     
16     -64    
480    1120   
-768   -544   
-976   480    
1824   -96    
-1648  112    
608    240    
224    112    
-288   176    
336    80     
-96    80     
-256   0      
96     144    
96     16     
112    240    
-240   -16    
-48    160    
0      -272   
432    -464   
-304   -32    
-320   48     
48     -128   
656    432    
352    -96    
-832   352    
80     -240   
416    -624   
352    -112   
-320   0      
-96    80     
-128   112    
112    0      
-176   -16    
-32    -2144  
-240   -256   
48     192    
704    400    
-784   32     
288    -752   
16     32     
128    -112   
48     48     
-128   96     
-96    272    
416    96     
-176   224    
-112   144    
-336   80     
224    -336   
96     -864   
2464   1680   
-2560  1088   
592    144    
1808   -96    
-512   -96    
-800   400    
288    -192   
112    112    
-16    -688   
-336   240    
240    -48    
-976   -160   
592    128    
96     -80    
-384   -32    
64     -784   
432    48     
0      112    
-80    -224   
288    -976   
-112   32     
240    -48    
-160   192    
-624   -208   
256    160    
320    64     
-144   160    
304    0      
-384   64     
288    16     
16     -1760  
-112   192    
-32    96     
288    512    
-240   384    
176    544    
336    -16    
-224   96     
256    240    
-368   192    
336    208    
192    144    
-64    480    
112    -96    
-352   -336   
-144   -832   
256    1088   
448    -320   
-288   560    
320    400    
32     -80    
-128   -464   
-288   256    
320    608    
-176   224    
384    496    
32     608    
320    928    
-80    448    
-176   624    
464    432    
48     272    
-48    -32    
64     624    
0      640    
368    400    
96     352    
-192   736    
-176   208    
272    -880   
224    192    
-144   48     
-176   304    
80     -48    
224    64     
64     -416   
-208   -80    
144    224    
-48    -224   
128    384    
112    -16    
-512   1648   
864    -224   
-272   512    
-320   912    
352    288    
496    80     
-560   912    
-112   -304   
400    304    
64     -192   
80     -80    
-160   80     
80     -160   
192    416    
176    80     
-336   48     
-32    64     
96     336    
96     64     
0      336    
-496   832    
704    192    
-560   -240   
-16    192    
464    -128   
176    -96    
-240   224    
0      288    
-80    272    
208    -1456  
-48    16     
64     -352   
64     -592   
-48    48     
96     -240   
-48    0      
16     -2096  
80     -592   
128    -48    
432    144    
-128   160    
-64    128    
-128   -656   
144    96     
-80    -736   
224    -32    
-496   96     
-144   80     
320    -208   
-592   -912   
1632   -1536  
-176   48     
576    -576   
-96    -176   
-96    -112   
-224   -240   
-160   880    
448    -480   
-112   -272   
-224   -464   
32     640    
272    400    
-64    -432   
-496   -96    
32     -272   
112    480    
160    -208   
-160   32     
384    -1168  
-160   352    
256    -608   
-2176  512    
1440   32     
-592   832    
208    720    
400    672    
-80    288    
-1376  -640   
96     -1856  
464    -1120  
-464   -48    
96     544    
80     -48    
-384   -944   
-16    -544   
288    -528   
16     160    
-784   -432   
256    -288   
288    -240   
-80    208    
-176   -160   
16     -352   
-32    96     
752    1168   
-640   1568   
448    1056   
-320   1104   
480    848    
176    208    
-336   -624   
336    96     
400    368    
-656   640    
464    384    
-208   -144   
-160   -832   
-1152  -64    
32     208    
-16    112    
-272   -112   
80     -128   
-32    720    
464    256    
-96    720    
0      -464   
-128   16     
512    -48    
160    384    
-512   -1184  
1152   -2336  
464    400    
-64    -432   
-992   -560   
352    -432   
-176   1216   
736    1168   
-544   416    
-1072  -272   
528    -64    
768    -528   
-128   48     
-720   -368   
128    208    
560    -64    
-32    -16    
-464   -208   
-544   -32    
528    544    
240    560    
-128   32     
-64    -192   
-656   -64    
688    -256   
-128   256    
16     -16    
224    320    
-384   -160   
288    528    
-48    656    
16     544    
32     32     
-336   192    
-224   192    
336    112    
-192   48     
112    -96    
240    -64    
-80    -48    
64     48     
176    16     
48     32     
-96    -32    
112    -32    
96     -32    
128    208    
144    -304   
256    -368   
-464   -32    
48     -128   
416    416    
-1120  336    
224    368    
224    176    
-64    96     
-96    -400   
-416   -96    
16     -16    
80     128    
16     48     
-224   32     
0      96     
176    64     
-272   32     
-96    -48    
128    112    
16     144    
-256   -112   
-16    -688   
-240   288    
-112   -288   
-128   128    
-16    96     
-112   48     
-112   -624   
-272   -272   
144    336    
-960   -112   
96     288    
-176   -624   
1440   1632   
288    352    
-944   160    
176    112    
-64    48     
-272   -272   
496    -128   
128    208    
-400   -144   
-32    -48    
256    0      
-192   256    
-64    -32    
-64    -256   
-416   16     
176    192    
-128   -112   
-48    -96    
-48    -80    
0      144    
-176   -1120  
-64    288    
656    240    
-608   96     
464    320    
176    -48    
-208   400    
-224   16     
176    -112   
-528   0      
336    48     
-256   48     
-192   80     
-160   256    
800    -48    
-288   80     
0      -80    
-48    96     
144    80     
-128   -32    
48     0      
16     -16    
-96    -32    
192    -16    
-576   -96    
624    192    
-992   -32    
-112   48     
160    -96    
528    -880   
-704   -400   
256    -320   
-128   -96    
192    128    
-528   -128   
160    -160   
-208   160    
16     -144   
288    128    
-16    -16    
-208   112    
-576   -64    
224    208    
0      -80    
-352   144    
480    112    
-224   0      
-112   176    
192    -64    
-176   32     
352    448    
416    -304   
-1952  416    
1296   48     
-96    -112   
-896   208    
208    -128   
416    16     
-544   128    
80     16     
320    144    
-144   48     
-352   80     
496    80     
-288   96     
0      16     
-32    -16    
64     -80    
0      -32    
-288   -64    
64     64     
-688   -528   
272    128    
544    176    
-528   -64    
0      48     
-112   -560   
-176   800    
816    -240   
-352   -16    
304    96     
-272   -64    
-336   -32    
-48    64     
32     400    
-480   240    
-192   -64    
112    -304   
224    -32    
128    -96    
-16    96     
16     112    
-336   192    
208    80     
416    304    
-656   112    
-384   96     
240    16     
144    -336   
1024   704    
-1360  1184   
1200   464    
1488   -384   
-1248  -144   
-176   336    
336    -112   
368    16     
192    -64    
-800   -128   
464    176    
-80    64     
96     96     
96     80     
-368   176    
-240   -304   
208    304    
144    -128   
-192   320    
512    608    
-192   208    
-64    -32    
-128   16     
656    64     
-416   -304   
-64    0      
592    -144   
-320   112    
320    -400   
-672   -576   
32     -544   
272    32     
-112   64     
-192   80     
112    -512   
-192   -256   
144    112    
576    -224   
-224   -608   
-384   -464   
144    -272   
48     -240   
-48    -16    
16     144    
-176   48     
-288   -176   
-96    -1008  
288    512    
128    112    
-368   -464   
176    -320   
320    864    
-848   688    
448    816    
-224   896    
288    560    
448    1072   
-272   2016   
-96    1104   
80     -976   
-192   -128   
144    -336   
-32    256    
48     -176   
16     592    
208    128    
-336   -224   
208    -176   
208    -160   
-224   -80    
16     -32    
-288   80     
48     144    
112    128    
-64    336    
160    64     
-64    -928   
-224   -96    
256    -208   
208    144    
-176   160    
336    384    
-352   272    
64     -16    
480    224    
-128   -80    
-336   352    
80     -128   
192    -80    
288    288    
-80    -32    
-144   -688   
0      112    
192    272    
240    80     
-416   112    
144    128    
-128   -16    
208    240    
-32    112    
0      -16    
-464   -48    
544    96     
-496   -96    
80     -176   
256    352    
0      -320   
-128   288    
-48    -2240  
-32    -112   
176    -16    
-96    176    
-80    336    
128    16     
128    16     
-352   256    
288    -32    
192    160    
-256   560    
128    320    
48     48     
-112   -400   
144    -16    
160    -1216  
-80    48     
96     -2336  
80     240    
80     16     
-240   -48    
256    0      
-16    512    
-224   1008   
3152   -1280  
-1616  -192   
-128   -880   
432    192    
-32    48     
-832   -656   
80     192    
208    432    
-208   -800   
272    400    
80     -304   
-272   336    
288    -496   
176    160    
-272   64     
16     176    
48     -400   
400    -336   
-176   432    
128    -800   
-1408  1344   
1680   -640   
-896   32     
-48    192    
496    640    
80     1744   
-672   1280   
-192   1152   
768    1472   
-240   544    
128    -160   
64     128    
-288   -208   
-16    16     
256    -432   
192    848    
-288   64     
-272   -160   
160    -848   
368    192    
-256   64     
-464   -624   
576    688    
208    720    
-272   224    
-832   96     
384    112    
-304   304    
384    320    
-272   -112   
-336   -80    
272    -16    
400    272    
-208   480    
544    -64    
-80    -176   
656    480    
-32    -192   
-384   -1600  
128    -432   
-128   -192   
512    112    
-400   240    
32     352    
-80    -400   
-128   144    
192    -416   
-496   -32    
-16    -1104  
672    256    
1056   -96    
-1008  -768   
-944   128    
512    -640   
928    -208   
-592   128    
0      192    
-352   112    
752    -512   
-176   -288   
16     160    
96     80     
-528   176    
736    -144   
-208   -208   
192    -16    
-96    -208   
128    800    
448    -912   
-336   -624   
-160   -64    
112    -160   
-144   -112   
592    -304   
-208   16     
112    -368   
112    160    
224    -64    
0      160    
48     -368   
0      -128   
-96    112    
-96    32     
-256   64     
128    -496   
-480   96     
-80    -224   
-512   -64    
512    -80    
224    -48    
-224   -768   
160    -144   
-528   -864   
464    336    
-112   176    
-160   368    
96     -224   
144    -448   
-160   -368   
-96    -112   
288    608    
736    112    
-208   80     
-288   112    
256    144    
-112   16     
-208   -112   
0      -224   
144    32     
-32    16     
160    64     
-128   16     
96     -112   
64     48     
32     -384   
-128   -400   
112    -240   
-208   256    
336    -352   
-304   -96    
48     -208   
96     80     
32     64     
80     208    
-80    256    
288    -480   
-176   -96    
0      352    
-16    -128   
-560   -2336  
112    304    
688    -96    
-1264  -16    
688    416    
-544   48     
-768   176    
-208   -80    
592    -400   
112    144    
-128   -1776  
-192   -64    
80     192    
400    176    
-448   208    
48     -192   
80     -160   
-32    224    
80     -240   
-32    -96    
576    1408   
-1040  -432   
-256   208    
1376   -96    
-512   16     
-672   -80    
544    -48    
192    112    
-160   -128   
48     -224   
-144   208    
80     80     
-80    48     
-80    48     
-160   -48    
240    -16    
272    -400   
-528   144    
464    -208   
-192   320    
272    -384   
-48    0      
-176   -16    
112    80     
192    16     
-464   80     
-48    16     
96     64     
64     -128   
-416   -1152  
528    3344   
1456   -432   
-1584  400    
-144   -704   
-192   240    
512    144    
-128   704    
32     976    
-288   480    
-272   160    
336    -144   
-80    16     
96     -16    
0      32     
-592   -160   
528    224    
-400   -112   
-64    32     
48     -128   
-400   -128   
-48    144    
-592   -608   
-80    384    
832    -240   
-1392  -176   
-80    48     
416    -32    
-400   -96    
-464   -256   
336    -80    
208    144    
-176   -144   
112    128    
-224   -176   
-304   -208   
192    112    
16     32     
-256   -112   
112    96     
-16    32     
-160   -80    
-64    -160   
624    368    
-32    -592   
-608   176    
848    96     
-896   -80    
-48    176    
784    -80    
-496   288    
-48    0      
128    80     
224    96     
16     -144   
-144   -160   
-432   -96    
144    -368   
-304   240    
80     32     
-400   -32    
64     16     
288    304    
-560   176    
-96    16     
32     -128   
288    -288   
-128   224    
-80    -112   
-528   -448   
1008   -432   
-1104  -1984  
-1072  -240   
-32    16     
320    96     
496    -16    
64     256    
-752   -496   
-416   -288   
448    -112   
160    -528   
48     144    
-352   -96    
-160   224    
304    -112   
64     272    
-224   64     
-176   32     
-112   -176   
320    512    
-1136  960    
128    800    
16     -64    
192    -144   
400    976    
192    176    
-96    528    
-400   752    
464    784    
0      -624   
16     -336   
-384   160    
128    256    
-80    -272   
224    -144   
-352   -160   
-240   192    
240    -16    
240    448    
-80    368    
128    -160   
0      272    
-416   64     
-96    -480   
48     880    
432    368    
-128   -112   
-256   48     
64     -640   
-64    96     
-192   -208   
-416   -64    
-400   -64    
1312   -784   
-512   -432   
-96    -160   
400    208    
-208   -832   
272    480    
-432   416    
96     -192   
224    96     
-128   48     
-64    -96    
-64    592    
-240   16     
32     64     
-96    112    
96     80     
448    -48    
-208   -16    
64     80     
48     32     
272    32     
-48    144    
80     128    
16     -32    
-80    48     
-320   -16    
160    304    
16     64     
-416   -192   
800    -432   
112    672    
48     -272   
-432   320    
96     80     
192    96     
-272   400    
-288   416    
224    -64    
160    -256   
0      288    
-48    240    
48     304    
0      0      
80     -96    
192    96     
-288   304    
-208   96     
96     -48    
-224   -192   
816    -576   
-400   544    
352    -160   
-352   320    
32     0      
112    256    
32     192    
-256   -32    
256    -80    
32     80     
-16    256    
96     48     
-80    80     
240    -16    
-96    -80    
112    272    
48     -64    
384    352    
-208   800    
208    336    
-64    -48    
-96    32     
80     128    
224    160    
192    -32    
0      -112   
-224   128    
592    -304   
-592   400    
672    -384   
-2880  -176   
976    128    
160    -240   
-480   -576   
176    112    
-432   224    
16     -304   
272    384    
384    112    
-496   -208   
-288   -432   
256    -144   
432    144    
-368   128    
-96    240    
208    336    
352    464    
-544   -160   
112    -144   
-272   -400   
672    1104   
1552   192    
-1712  -160   
1856   -1280  
-1904  -288   
1168   -528   
16     -48    
-1008  416    
464    432    
96     96     
96     -64    
-16    64     
-240   448    
736    176    
48     32     
-224   176    
208    192    
240    -288   
208    640    
-448   368    
-112   -64    
864    640    
-16    -160   
-720   432    
304    176    
-304   -528   
160    112    
48     112    
-16    -48    
144    -240   
-496   -32    
-48    64     
144    96     
704    80     
80     -848   
-832   832    
-240   -192   
-496   160    
160    0      
-32    256    
-192   -48    
208    128    
176    -64    
-272   80     
272    -144   
208    -144   
192    64     
-320   -160   
192    1472   
-368   992    
96     864    
-496   32     
-1040  64     
976    64     
448    -80    
-416   64     
-352   -64    
304    416    
-352   48     
48     112    
-128   -64    
-208   32     
208    -160   
-48    128    
224    -400   
176    128    
-128   -640   
-112   -528   
-688   -160   
848    -192   
-464   144    
160    -80    
496    144    
-256   32     
-432   160    
992    -128   
-288   304    
-128   -464   
-160   128    
256    -992   
208    240    
-576   -800   
528    384    
-112   -80    
80     400    
-288   -64    
-208   384    
784    144    
-400   112    
256    112    
-336   -144   
32     192    
448    -48    
-176   400    
320    -256   
-352   144    
416    -208   
240    384    
-480   0      
112    128    
-240   -544   
304    352    
-112   -48    
-768   -784   
1056   -16    
176    -768   
-368   192    
-48    144    
-32    160    
240    -64    
-16    144    
-176   -48    
176    -16    
-80    -80    
16     224    
-16    -48    
-32    -112   
368    -432   
-272   -128   
176    128    
80     0      
-192   48     
32     48     
144    176    
256    -448   
-304   304    
256    592    
272    160    
-208   -240   
896    -624   
-2336  752    
608    -944   
736    -1168  
-416   -208   
-176   16     
144    -864   
128    -144   
320    576    
272    -32    
-528   -320   
-96    432    
544    -192   
176    -176   
-624   384    
128    -64    
16     -144   
-80    192    
160    -192   
-256   64     
-320   -912   
752    -720   
-288   208    
112    -192   
176    -496   
-352   240    
256    16     
240    -160   
-48    -48    
-112   288    
48     -256   
-32    48     
96     112    
112    -32    
-256   -80    
384    -304   
-80    -80    
-112   -304   
288    -368   
-176   -336   
336    -48    
32     -224   
-160   0      
32     -176   
-32    -112   
432    -80    
-304   -16    
-48    64     
192    16     
-976   -288   
-1136  -1808  
-1104  -976   
2464   -816   
-848   -256   
-400   80     
928    -144   
-320   -1280  
-176   -368   
64     -176   
-48    112    
144    80     
64     -112   
-144   -48    
288    208    
-624   -96    
224    352    
384    -144   
-80    160    
-48    -304   
-400   112    
96     0      
-560   -1776  
1120   -496   
-176   -64    
-1200  -528   
272    144    
256    -208   
32     -224   
-176   -176   
-48    -16    
304    -128   
-176   528    
-480   -272   
-320   -48    
16     -560   
128    96     
320    -480   
-544   -304   
352    -288   
-64    32     
-80    224    
96     80     
96     416    
384    -512   
368    112    
-528   128    
-832   -1072  
0      192    
336    -80    
-272   32     
720    0      
-80    -320   
144    288    
16     -752   
0      240    
640    400    
352    240    
-704   -448   
-80    64     
272    624    
-560   -64    
-144   16     
400    32     
-176   -256   
-32    -144   
-240   -192   
64     -528   
-80    80     
96     -992   
160    80     
1312   2800   
-992   1472   
-960   -320   
1776   0      
-640   624    
-624   480    
736    1120   
768    1248   
-304   1056   
288    -880   
-208   16     
192    64     
192    16     
-64    112    
-400   -240   
-320   -224   
416    80     
48     -224   
-208   -304   
0      -320   
-16    240    
16     0      
32     -144   
480    -80    
-784   -272   
304    64     
-688   -576   
144    -752   
-240   -368   
-256   -432   
-400   -112   
-368   352    
64     608    
192    224    
-608   -528   
32     -944   
-144   -96    
208    -112   
368    976    
-400   -272   
16     0      
-80    -112   
-48    224    
-144   -176   
64     -416   
-128   208    
112    288    
64     688    
-1040  -208   
128    -112   
112    -160   
-208   1184   
1216   -512   
-608   -48    
-16    -64    
-176   368    
512    672    
-288   -80    
144    -1136  
128    -416   
-64    176    
-160   240    
0      320    
-32    96     
-304   480    
-320   64     
-48    80     
160    -32    
304    -64    
-64    -96    
64     48     
16     32     
144    -16    
-112   192    
-160   144    
32     -16    
-544   -384   
80     -512   
96     -16    
16     128    
-288   -64    
144    -400   
-320   -176   
-48    320    
112    -112   
224    384    
112    -144   
-112   64     
-96    608    
288    112    
-160   192    
-160   400    
-48    64     
144    32     
-160   -16    
-96    80     
-32    304    
-224   176    
-16    80     
-96    -336   
-144   -240   
496    192    
336    -112   
-720   96     
448    256    
-624   32     
144    352    
288    704    
-80    -128   
-400   -64    
-240   320    
432    224    
304    -416   
-368   48     
-288   -272   
240    -144   
320    560    
-48    -352   
-384   512    
-16    -224   
224    288    
96     -144   
-48    16     
-336   -176   
192    96     
-16    -16    
-32    256    
-464   -128   
-48    176    
-224   176    
1008   1264   
-208   352    
-1296  368    
1440   240    
-992   16     
496    48     
-256   256    
0      272    
-16    32     
128    336    
-224   64     
-128   352    
80     -160   
16     80     
-624   48     
272    80     
256    160    
-32    48     
0      208    
224    16     
-176   176    
64     16     
752    -1024  
-1248  32     
368    -208   
-64    304    
-176   224    
-528   -320   
1088   -16    
-592   176    
-32    32     
240    112    
-400   96     
384    48     
32     -48    
-400   144    
288    48     
-32    336    
-128   16     
48     96     
-624   -48    
96     48     
544    544    
368    -64    
-48    224    
16     528    
32     96     
304    672    
768    -96    
208    -496   
-880   -160   
336    128    
336    144    
-384   160    
-368   240    
-368   -784   
256    -432   
784    128    
-560   -288   
-224   0      
608    32     
336    128    
-352   -96    
-32    32     
176    32     
368    -176   
-720   384    
528    144    
-240   112    
16     288    
1184   864    
-352   128    
144    -176   
640    -192   
-1056  0      
-160   336    
880    368    
48     -128   
-416   -96    
48     -16    
208    128    
-128   -16    
-160   224    
-32    -32    
-80    112    
128    32     
80     112    
-416   16     
-272   -176   
1136   112    
-272   -144   
-240   224    
96     320    
0      224    
192    112    
-464   0      
224    -384   
-352   96     
128    -208   
-80    176    
64     -16    
176    176    
-16    176    
192    16     
240    352    
-624   -16    
352    64     
368    -48    
-336   256    
736    288    
-400   96     
320    -48    
176    80     
-112   16     
64     128    
-112   432    
0      256    
16     368    
304    -128   
-160   -32    
-32    -112   
-64    -384   
624    -592   
-272   336    
416    320    
-368   240    
-352   -448   
-176   -112   
304    80     
-144   -208   
-48    192    
208    -352   
-32    144    
-144   32     
64     80     
224    64     
144    80     
-496   208    
160    368    
176    0      
-160   -384   
-48    -336   
192    480    
-288   224    
208    -112   
144    48     
80     -128   
-320   384    
48     -32    
160    16     
48     32     
-880   -288   
2032   -704   
-832   -272   
-640   -112   
1056   272    
-128   160    
-288   32     
-272   -864   
384    -272   
-16    480    
-96    -224   
176    112    
-112   -336   
368    -64    
-320   688    
48     -208   
-112   -128   
144    160    
-192   -160   
256    32     
304    -336   
-928   960    
704    -176   
-224   -384   
64     304    
192    64     
-192   784    
96     -1152  
48     -160   
160    -640   
-32    -96    
-96    352    
16     32     
304    -96    
-240   16     
-64    80     
-16    -192   
96     -96    
-96    -80    
144    32     
-16    -208   
-96    64     
16     -352   
112    0      
448    48     
-496   -32    
224    240    
-144   144    
96     -16    
-576   112    
448    880    
1568   -64    
-1200  160    
864    -432   
-192   -208   
176    -880   
144    -80    
0      -304   
48     240    
-176   -112   
160    176    
256    32     
-112   112    
-48    -192   
-96    64     
288    16     
-176   -272   
112    32     
16     -432   
192    144    
208    1008   
-816   -576   
-544   208    
688    160    
-464   -2128  
-32    272    
48     208    
544    752    
288    -48    
-208   -224   
-672   -272   
256    -128   
400    -416   
-128   -304   
-160   -32    
224    144    
-112   64     
416    -592   
-16    144    
-16    32     
-80    64     
64     240    
288    -32    
-112   -64    
-112   288    
-144   -480   
-608   -1520  
-576   -1296  
480    -304   
-608   -96    
112    -128   
-112   -144   
160    -448   
304    608    
448    320    
-528   -448   
304    -768   
-224   -448   
128    -144   
64     -48    
-16    -448   
-64    -144   
-112   -192   
96     -32    
-112   -528   
768    -1072  
208    336    
-64    -304   
-48    -208   
48     32     
1344   1792   
-2240  320    
-912   768    
2608   -1968  
-736   -832   
-128   224    
-608   176    
432    -304   
224    -32    
16     0      
-80    224    
16     -352   
464    144    
48     112    
-80    -128   
-176   160    
192    272    
-32    144    
-144   -16    
304    160    
-208   -848   
-368   -144   
-352   -384   
-128   240    
896    144    
-80    -640   
-160   -192   
-224   -80    
-240   -3472  
240    288    
112    -400   
-208   544    
-160   128    
208    320    
160    0      
-240   -160   
-320   -208   
384    64     
-960   416    
-32    -192   
-64    -16    
-320   176    
400    -128   
112    -160   
-32    864    
-64    -32    
352    304    
-112   864    
48     -448   
-16    -128   
-320   -816   
304    160    
-192   -464   
-848   -496   
-64    -432   
-576   -48    
-48    32     
304    144    
-16    -320   
-256   -96    
-48    -288   
192    -96    
160    -96    
-48    -128   
-32    192    
192    448    
-112   -64    
-272   -64    
-672   -16    
144    -400   
-304   48     
176    -80    
48     144    
-240   -320   
32     -160   
-96    -480   
16     -544   
-144   -624   
16     -160   
240    -304   
-16    848    
-400   -272   
256    0      
368    432    
-160   352    
176    528    
-256   480    
192    -672   
288    -1152  
-80    256    
-208   240    
80     336    
224    -80    
48     176    
-256   16     
16     -192   
-208   -256   
256    48     
128    176    
-240   0      
-144   512    
80     -704   
288    256    
48     128    
-384   -16    
-112   480    
64     -496   
144    208    
-16    -80    
-96    448    
112    320    
112    320    
-160   -192   
-112   544    
48     -224   
-80    160    
-576   -560   
-96    -240   
80     -352   
-144   -80    
0      80     
-192   -32    
-96    -144   
-176   -16    
-96    -208   
-240   -160   
192    32     
128    -96    
-272   -240   
560    80     
-1536  1280   
1344   416    
-240   352    
-928   -672   
1136   448    
336    -128   
-1008  -160   
256    -432   
32     80     
-176   0      
0      144    
112    96     
-128   -144   
128    208    
128    -64    
-272   208    
96     -224   
32     80     
-96    -160   
-176   176    
128    128    
80     208    
-1872  208    
640    208    
208    -80    
-816   -16    
672    208    
-960   -224   
400    224    
160    144    
-112   112    
288    -96    
-224   240    
-256   -48    
-48    48     
544    80     
-144   144    
-176   -144   
64     -144   
-368   112    
-320   96     
320    784    
-896   288    
-304   -112   
176    128    
-288   -32    
96     -592   
496    16     
208    -608   
-320   -432   
368    80     
-128   32     
112    304    
-96    368    
-464   -96    
96     240    
320    544    
-144   0      
272    544    
-608   -32    
-688   176    
160    80     
288    0      
112    -192   
-656   -128   
256    -128   
-96    -352   
-416   -32    
-96    192    
-832   -1344  
-1312  2240   
1280   592    
-2048  -112   
-48    -288   
576    144    
176    272    
-1360  -64    
-144   -144   
1280   128    
16     272    
-528   48     
-336   112    
208    160    
112    32     
-32    48     
-464   -48    
96     48     
-96    16     
944    752    
-1312  448    
368    608    
352    -224   
-16    80     
416    32     
-672   16     
880    688    
-528   272    
-80    176    
432    -16    
112    32     
-400   32     
208    128    
-400   -128   
528    288    
-176   -32    
-160   448    
160    176    
-288   352    
-80    48     
-80    48     
240    32     
-96    128    
-32    -32    
32     -64    
32     -240   
-256   160    
80     160    
-48    32     
144    160    
-272   192    
272    224    
-192   352    
560    -16    
-320   -32    
-256   192    
576    48     
-160   -64    
64     512    
-384   416    
128    208    
-64    -16    
16     16     
-160   -16    
144    320    
80     320    
64     256    
-224   240    
32     -240   
-112   -640   
-16    -320   
-32    80     
96     480    
-288   240    
128    -176   
144    288    
32     -48    
-224   -384   
32     -784   
0      -96    
144    144    
848    1744   
-2752  704    
912    32     
800    -848   
-368   240    
32     128    
-272   -272   
288    -352   
-128   -240   
192    -32    
-384   -48    
96     32     
320    -64    
-112   0      
-144   -592   
112    240    
128    416    
112    192    
32     64     
-96    48     
-240   -576   
176    -1424  
256    -192   
16     656    
128    640    
-160   -64    
-80    -192   
208    128    
-80    80     
0      32     
-64    64     
64     48     
-96    16     
208    -112   
-144   192    
-176   80     
304    368    
128    336    
-176   112    
176    0      
128    -304   
-16    240    
80     160    
48     -1056  
-32    256    
240    -80    
-48    -64    
128    496    
-112   32     
80     -192   
16     -960   
-1392  1056   
1632   272    
-736   -304   
-288   384    
304    -96    
-688   1360   
320    864    
-112   -704   
48     -384   
96     0      
-208   144    
224    0      
-192   96     
48     416    
352    400    
-224   208    
80     848    
240    496    
-256   -432   
-336   -1200  
1360   864    
96     -80    
-1328  -1920  
688    -560   
96     1104   
-352   1264   
464    704    
64     32     
-272   -560   
-192   -560   
320    -208   
16     448    
-144   240    
192    0      
-48    -48    
-32    -16    
208    32     
-528   -976   
-48    -992   
96     -224   
176    -64    
48     768    
-560   -1312  
-240   -752   
224    -16    
64     64     
-288   -480   
-32    1296   
352    1936   
-368   416    
784    -496   
-48    224    
-640   -464   
368    256    
736    -80    
144    432    
-192   288    
-720   -48    
752    240    
-400   352    
-64    640    
160    96     
208    -336   
-48    448    
288    -80    
-368   -32    
528    448    
-272   528    
-288   48     
-224   -1472  
1968   -272   
1072   -1904  
-752   496    
240    960    
-192   -272   
320    -432   
-96    -256   
-384   1312   
-304   -400   
-288   176    
560    -48    
-208   176    
-112   448    
192    80     
-80    -160   
-48    480    
144    0      
32     -80    
80     -80    
-16    480    
0      144    
-16    -160   
32     256    
528    608    
-608   688    
592    176    
272    496    
32     -528   
-160   -928   
-80    -320   
288    320    
192    96     
-288   -160   
272    -16    
96     224    
-192   160    
160    464    
96     -816   
-336   -736   
64     352    
448    -16    
-128   208    
112    -96    
416    656    
-464   -848   
-48    -512   
96     -1952  
0      -96    
128    448    
16     64     
-128   -1120  
-176   -928   
288    -704   
-64    -240   
80     -2720  
304    -704   
-48    -576   
-96    112    
144    832    
144    608    
-48    96     
112    -16    
32     -496   
32     240    
48     64     
0      160    
-848   -592   
384    -656   
-240   -272   
112    64     
128    80     
-64    -272   
176    192    
0      208    
-48    96     
176    -576   
-128   -608   
96     80     
48     448    
-368   -624   
960    -320   
-576   144    
400    -416   
-320   640    
0      80     
240    496    
-48    208    
144    -432   
-272   -1296  
272    -96    
192    48     
48     16     
-32    80     
-176   384    
0      -336   
0      -736   
-48    -752   
-16    -512   
-400   -32    
48     -48    
-144   48     
688    -672   
-656   -112   
592    -400   
32     -32    
112    400    
32     416    
-160   -112   
-48    176    
0      96     
128    -240   
48     -80    
48     16     
-480   48     
448    -256   
-336   16     
272    -144   
-464   -32    
576    -272   
-416   16     
224    -2736  
0      32     
-128   -32    
208    -96    
-256   -144   
0      0      
160    -96    
-336   208    
272    112    
2448   2656   
-1728  -1376  
-3312  -176   
944    -448   
1664   -272   
-624   -112   
-1168  -16    
1136   176    
-448   160    
-16    -192   
400    32     
-144   -80    
-96    -16    
0      -160   
-272   -112   
272    32     
-240   0      
-112   -176   
288    -112   
368    -80    
-240   -112   
112    -576   
1104   432    
-1664  432    
-48    -1184  
528    160    
128    -160   
-736   224    
512    160    
-192   -64    
112    -240   
-272   16     
128    -160   
32     80     
-160   128    
848    16     
-448   -416   
288    480    
160    192    
48     256    
-16    96     
-208   112    
-352   -608   
512    800    
-192   32     
-1104  0      
448    -48    
208    -112   
304    320    
-320   160    
-208   -128   
-384   -368   
480    224    
176    -16    
-320   272    
-464   -96    
512    -672   
-224   432    
-144   640    
592    -208   
-128   -96    
-240   320    
-224   16     
256    -176   
-432   -128   
32     -96    
-1696  240    
-224   -48    
-432   144    
-880   -528   
1952   4880   
-576   1456   
448    -432   
480    -224   
-480   -128   
288    288    
-736   208    
-16    -480   
-32    272    
-192   -256   
-240   336    
-208   -144   
240    48     
-48    0      
16     -80    
-128   208    
-240   -96    
-224   176    
-48    0      
-704   272    
880    336    
-784   320    
352    -176   
96     144    
-384   64     
240    192    
-64    64     
112    32     
-384   -320   
-320   -224   
80     -64    
-32    16     
96     16     
-656   -224   
160    -64    
-272   -320   
224    -48    
-656   -464   
-16    -176   
-48    112    
48     96     
256    0      
-256   0      
288    -208   
-592   -272   
-352   -80    
432    144    
-96    -32    
-672   -224   
-144   80     
-176   -80    
-112   -288   
208    -592   
-208   384    
576    -32    
-256   32     
0      -336   
144    400    
-416   544    
192    128    
160    -176   
-64    112    
-64    112    
-80    -16    
192    96     
-16    160    
-304   80     
-96    -160   
48     80     
112    48     
32     -144   
-224   -384   
-112   -784   
-64    -512   
496    -240   
-432   -48    
-320   -32    
112    560    
448    576    
-112   -416   
-528   -256   
-672   -1568  
80     -448   
-160   432    
-384   -464   
528    -128   
-80    448    
-32    -784   
96     -208   
0      272    
-80    -96    
-192   176    
96     144    
-32    112    
144    16     
-288   -112   
176    -64    
-336   -304   
0      464    
0      112    
-96    -80    
-112   -736   
-288   -432   
80     352    
-416   352    
240    256    
16     -752   
-160   -960   
64     768    
352    576    
-48    -464   
-64    480    
-224   -144   
-16    288    
-64    96     
-32    -128   
-208   224    
-16    -16    
704    -416   
-144   128    
-272   464    
16     160    
208    -32    
0      0      
160    176    
-416   192    
256    352    
-512   16     
-144   -192   
272    -64    
-96    224    
-1264  432    
2336   240    
144    -16    
-1376  192    
832    448    
448    -144   
-624   352    
144    80     
288    -176   
-336   352    
-48    256    
-64    -304   
-128   0      
272    -48    
272    144    
-64    48     
-224   32     
320    160    
192    144    
-112   96     
752    496    
-1792  240    
384    128    
480    176    
-352   784    
336    864    
-464   -496   
160    304    
352    1488   
-352   256    
64     -736   
16     -16    
128    560    
-384   464    
208    0      
-416   224    
416    0      
-528   -192   
112    272    
80     32     
-240   16     
352    464    
-224   304    
-656   -512   
176    752    
336    720    
-336   -96    
544    -1776  
-640   -528   
464    480    
64     640    
-592   848    
96     16     
0      576    
544    -672   
-560   448    
336    976    
-416   560    
-48    368    
336    48     
-400   208    
112    48     
0      640    
96     160    
-352   -128   
128    -464   
320    -192   
384    -768   
48     -288   
48     208    
-496   -2160  
-1712  -32    
1136   48     
176    1312   
512    0      
-400   -368   
-720   -928   
560    -1072  
160    640    
112    352    
-464   160    
-288   -192   
496    -256   
368    528    
-304   -288   
-16    -2496  
208    176    
208    240    
64     960    
-144   992    
48     400    
-80    -224   
752    64     
-16    -80    
-128   416    
128    144    
-608   -640   
288    -448   
0      -272   
-176   -512   
80     -640   
-272   16     
192    -32    
-464   -912   
-16    272    
240    464    
-224   -160   
256    -96    
-32    16     
176    480    
16     192    
-16    240    
-48    -224   
-416   -64    
208    -880   
-400   -640   
128    -336   
-448   -608   
304    -224   
64     -32    
-400   -608   
784    -256   
-480   192    
-528   96     
528    288    
-384   -112   
384    -336   
32     -400   
160    -16    
144    80     
-240   -672   
256    96     
128    -560   
-368   -176   
80     16     
64     -96    
-16    144    
-128   -544   
-48    -528   
64     128    
304    -272   
16     0      
-96    -192   
-48    -16    
144    208    
32     256    
416    48     
-272   -720   
-48    -32    
240    -96    
-688   -960   
944    -1040  
-640   160    
-192   -240   
464    320    
160    32     
-432   -16    
-112   224    
688    160    
32     208    
-192   -48    
-80    112    
0      32     
272    -208   
-80    -240   
352    544    
176    -80    
-368   -64    
448    -80    
128    176    
368    1312   
-1152  -144   
320    192    
768    -208   
-688   -32    
416    -272   
-224   336    
48     -512   
32     208    
336    -480   
-272   176    
-144   128    
320    144    
0      -16    
0      64     
208    80     
-304   32     
48     128    
-112   -304   
224    288    
128    -128   
-320   144    
16     -160   
80     96     
416    -304   
-608   112    
592    -64    
-416   192    
112    0      
48     -464   
592    -752   
320    304    
-80    352    
-320   -448   
800    512    
-320   -208   
-784   272    
432    -48    
48     -32    
-112   -96    
-176   -496   
384    96     
-256   80     
80     128    
80     64     
-416   -1328  
-208   -272   
560    -528   
112    -224   
-96    112    
160    64     
-656   -240   
1904   -112   
-592   -640   
-912   384    
2400   -384   
-992   16     
336    32     
432    288    
-768   -208   
144    -80    
-16    -16    
96     -256   
32     -48    
64     0      
448    -128   
-96    -1136  
-32    -480   
128    -528   
144    -96    
-144   -80    
480    1216   
-1120  -192   
-176   144    
768    -320   
-1072  -176   
864    -80    
320    560    
-432   -16    
32     -432   
-288   -128   
96     -2704  
304    304    
112    96     
-928   -560   
256    80     
640    432    
-224   256    
496    80     
-768   48     
192    0      
-528   -48    
16     -80    
32     -128   
16     128    
-352   -224   
-224   -608   
96     -192   
-320   -1712  
-544   -2640  
1184   -2000  
624    512    
-1584  -16    
128    192    
176    -112   
304    -256   
32     128    
-144   -176   
-448   -288   
-144   144    
416    -16    
-208   -176   
0      256    
-160   -416   
144    224    
-240   64     
256    48     
64     -16    
-208   -1232  
-544   -1248  
288    -192   
-96    192    
432    144    
128    -320   
-816   64     
688    -336   
-368   -144   
64     16     
512    -320   
-432   352    
288    -32    
80     240    
-160   0      
32     -128   
224    -208   
-240   -1072  
-368   -192   
64     160    
-592   64     
224    -64    
-480   -32    
288    -496   
240    -128   
-304   176    
448    720    
-208   480    
-16    592    
128    -176   
-432   -736   
192    -368   
-400   -64    
400    -240   
-96    352    
128    304    
240    256    
-304   272    
544    1856   
736    1760   
80     944    
112    528    
-176   352    
-64    -48    
-160   -176   
208    0      
-32    192    
0      112    
-64    -272   
32     -112   
-64    48     
128    -64    
-144   -320   
32     0      
16     -32    
-480   128    
208    176    
-352   -96    
240    144    
256    -144   
-240   32     
-144   -112   
0      -192   
272    -800   
32     128    
-96    176    
-176   176    
-16    0      
80     -80    
-96    880    
-736   64     
-272   224    
-64    272    
-112   48     
-96    48     
16     96     
-304   304    
32     48     
304    -320   
-144   48     
-176   -96    
-192   -208   
576    704    
-672   192    
-96    -96    
976    -112   
-880   480    
272    -16    
-304   -16    
112    256    
-96    112    
-96    -48    
-560   112    
192    160    
-64    16     
16     -304   
-112   16     
-176   208    
-160   80     
400    144    
240    288    
-448   208    
-192   80     
192    -16    
48     -192   
-64    0      
192    -96    
-288   -32    
-128   128    
0      -240   
80     96     
-208   -16    
128    -848   
-2352  -448   
1232   480    
-688   16     
-480   64     
304    640    
-288   -912   
-320   928    
352    1072   
128    640    
-176   -272   
-400   -320   
-352   560    
160    -400   
224    480    
-96    -80    
-224   -304   
-400   -640   
176    304    
0      -288   
-240   -272   
1456   480    
-1184  160    
-304   -288   
208    -80    
-896   -640   
352    -1520  
320    -736   
-128   768    
-32    1104   
-112   -288   
64     -224   
80     -288   
-128   48     
64     -112   
-240   16     
0      -208   
-240   224    
-464   -176   
176    -624   
-112   -240   
64     128    
-432   -224   
528    -416   
-480   -160   
-64    1328   
448    592    
672    1328   
832    1248   
-864   128    
384    368    
0      -272   
80     384    
128    -144   
176    80     
-1200  176    
384    -576   
224    -368   
272    400    
-208   -608   
-752   -240   
256    48     
0      -352   
-192   96     
64     -48    
-16    928    
816    112    
-368   -192   
-32    544    
192    448    
-320   -2752  
-1712  -704   
528    336    
-128   -976   
304    -1552  
-496   432    
-128   -32    
480    848    
0      416    
-208   64     
144    96     
-144   -64    
352    176    
-352   144    
-160   256    
-16    112    
112    96     
16     -64    
-16    48     
-480   832    
288    736    
-16    144    
-288   -544   
480    512    
192    144    
-768   176    
256    -368   
-80    -128   
-32    160    
64     -80    
-96    80     
80     -80    
-112   96     
224    -64    
352    160    
16     -176   
-768   -528   
432    -128   
208    144    
-192   192    
0      -96    
-496   -368   
544    -224   
256    32     
-240   160    
112    400    
-256   224    
-144   224    
432    176    
-240   224    
-256   80     
-160   -480   
240    -112   
144    544    
-544   0      
208    144    
448    16     
-416   64     
128    448    
-336   240    
224    -32    
0      144    
-208   -112   
208    0      
-176   80     
80     464    
448    -32    
-288   176    
-144   320    
480    -240   
-64    464    
-80    16     
-80    -368   
-64    -80    
64     320    
-128   368    
-208   -112   
144    48     
176    192    
-112   96     
496    2160   
-944   -1728  
-912   480    
1840   -128   
-704   -80    
-304   224    
32     432    
848    16     
-464   -256   
32     -48    
0      272    
-112   -32    
384    304    
-32    32     
-336   -288   
272    432    
-80    128    
128    -96    
144    144    
-80    112    
-304   -240   
704    32     
-160   224    
-624   -96    
640    96     
-432   -112   
128    -1056  
192    320    
528    -2544  
-592   0      
16     -16    
144    336    
720    16     
-528   160    
-208   16     
256    112    
208    -32    
144    0      
0      160    
112    96     
-96    -32    
256    -128   
-48    128    
32     64     
-64    192    
640    48     
-480   144    
64     16     
-16    176    
160    80     
-1344  -1520  
-1968  -1392  
3376   736    
-720   304    
-528   272    
-224   -224   
864    -448   
48     64     
-1008  -1008  
832    -96    
64     48     
-112   -64    
-176   128    
112    -48    
-368   -48    
736    96     
-336   -96    
-80    32     
144    -368   
-96    128    
128    48     
304    544    
-1296  416    
544    32     
32     784    
784    -736   
-320   672    
528    -48    
-416   208    
112    -16    
464    -48    
-224   144    
16     128    
16     112    
176    -176   
-96    80     
128    0      
-144   -16    
240    0      
240    -48    
-48    160    
32     -32    
32     -688   
1264   -48    
-672   144    
176    288    
-144   64     
176    288    
96     496    
-704   -256   
-80    96     
400    -112   
144    432    
272    -320   
80     -320   
-704   160    
512    -32    
-384   -304   
0      208    
80     0      
-240   -16    
80     48     
80     96     
16     176    
160    -160   
-224   64     
496    -160   
48     192    
-160   -176   
384    720    
1152   1904   
-2336  1232   
672    32     
1712   -208   
-1360  144    
-416   928    
528    -16    
176    128    
-224   144    
-64    -176   
368    -112   
-160   -192   
640    -224   
-208   64     
16     16     
-48    400    
496    0      
-256   -16    
64     -608   
-32    -1168  
128    -336   
-96    0      
16     224    
-560   -1344  
464    -528   
-192   -912   
208    -256   
0      208    
-16    608    
272    960    
-592   -464   
240    -368   
160    -160   
64     -992   
-144   144    
-112   -240   
192    -432   
-576   -256   
-288   -128   
176    -176   
-16    -64    
384    592    
144    608    
208    976    
-144   1216   
208    560    
336    224    
-320   432    
352    -880   
-208   -160   
304    -32    
560    48     
-1472  464    
992    608    
-304   512    
176    368    
288    288    
80     -496   
-80    -1472  
-32    -400   
288    -208   
-112   112    
48     0      
192    144    
-304   -112   
160    128    
128    -256   
16     -144   
0      -32    
-160   32     
144    -96    
64     48     
112    -400   
-160   48     
-16    -1216  
16     -176   
400    -208   
96     256    
-464   -16    
160    144    
192    -144   
560    336    
-880   448    
256    -208   
352    112    
16     -32    
64     -176   
224    112    
-432   128    
352    -528   
496    -304   
-304   240    
-128   -48    
128    -192   
48     112    
192    -16    
-256   -112   
-176   -368   
320    -176   
176    32     
-16    -96    
-1312  -64    
576    -112   
-384   -48    
48     -96    
400    208    
16     -1632  
400    0      
-160   160    
-112   192    
-208   16     
144    96     
-160   128    
-16    -208   
-128   -96    
-224   96     
-64    96     
320    64     
-336   576    
-64    0      
208    -64    
160    -992   
-208   -48    
-112   224    
-64    416    
-144   256    
144    -176   
48     -192   
-128   -160   
80     16     
-176   48     
512    768    
1616   48     
-1248  -400   
464    -800   
128    560    
48     1536   
160    -16    
-48    -1440  
64     720    
-192   400    
96     -80    
-32    16     
80     144    
-272   -128   
128    64     
16     -16    
128    -672   
48     528    
-16    384    
96     32     
112    -1008  
-1616  1152   
2368   160    
-1376  896    
272    -704   
192    752    
512    304    
-1120  544    
32     112    
368    768    
208    32     
-32    -352   
-208   144    
240    0      
-288   -192   
-736   -480   
-384   48     
0      -32    
64     64     
-160   48     
-128   96     
-496   -96    
464    -128   
-112   2784   
1824   1216   
-256   -416   
-1040  -448   
1120   160    
-432   144    
-160   -304   
-160   -176   
-192   -176   
96     576    
-544   80     
-528   -800   
-176   -416   
0      256    
-720   160    
400    -288   
896    -256   
-192   192    
-272   -320   
32     320    
192    -384   
192    96     
-896   416    
176    64     
128    16     
-544   -1168  
-448   -1760  
1424   224    
976    32     
-1424  -48    
-112   208    
192    -160   
-112   -112   
-256   -480   
-640   448    
304    -192   
176    288    
-32    -128   
-192   192    
-80    -64    
0      160    
384    32     
-400   224    
144    64     
-576   -448   
576    128    
-576   -448   
-208   -112   
48     64     
-656   -32    
368    -48    
352    64     
-384   32     
-192   160    
224    0      
16     144    
-208   -80    
16     -16    
-320   80     
544    384    
-112   176    
-544   432    
304    208    
144    -144   
-16    16     
80     -144   
-80    112    
272    80     
-176   48     
-48    0      
-352   48     
176    -48    
80     -128   
-464   -128   
208    -64    
-96    96     
-256   -32    
-112   -592   
672    -624   
-208   256    
-32    80     
48     208    
-16    224    
-368   176    
336    192    
32     272    
208    48     
-144   144    
96     64     
-48    -80    
-160   128    
128    -48    
-16    -192   
-880   -384   
16     176    
128    0      
-144   288    
16     128    
96     -64    
-176   -48    
96     -80    
-176   512    
-80    -336   
176    -160   
-288   224    
96     0      
-48    -80    
-976   -416   
1136   -912   
-496   64     
-1056  -432   
992    336    
160    -144   
-448   256    
-400   -592   
416    -352   
192    448    
-128   -32    
48     32     
-192   112    
32     144    
16     -192   
-80    416    
48     -320   
32     -352   
192    256    
0      112    
-272   -1216  
16     -16    
0      272    
-336   176    
576    96     
-288   -688   
-96    -32    
32     336    
-256   256    
176    16     
48     64     
32     -192   
-256   64     
176    80     
240    112    
-80    80     
-336   256    
80     352    
208    0      
-144   -96    
64     0      
-16    160    
-240   80     
128    160    
-80    32     
464    96     
-464   176    
240    0      
-160   96     
1568   144    
-912   672    
-640   -48    
1024   96     
144    -48    
-1328  -240   
624    -224   
192    -272   
-144   -320   
-48    224    
48     -48    
-272   144    
-48    64     
112    160    
-144   112    
592    240    
-400   0      
16     0      
-192   -368   
480    -336   
-224   -32    
-48    240    
608    -32    
-1408  -32    
1040   -1040  
-144   240    
-96    64     
32     -16    
48     208    
288    -80    
-288   64     
-176   160    
80     112    
272    112    
-48    160    
160    -80    
-592   128    
336    64     
-16    -240   
144    48     
-144   416    
-16    224    
208    80     
-672   272    
-336   32     
464    688    
736    0      
-256   -64    
-208   304    
-32    -16    
80     -144   
-320   128    
704    928    
208    -400   
-624   -336   
576    800    
-336   336    
-96    -32    
512    -48    
-400   176    
-96    96     
144    128    
160    64     
-16    96     
-256   16     
288    368    
-64    -96    
-288   128    
416    160    
352    -160   
-1536  544    
1072   -704   
1504   224    
-1072  128    
-1232  672    
1504   384    
-128   848    
-176   -128   
0      320    
-288   16     
160    736    
464    64     
-432   -304   
-176   352    
-112   -576   
384    -192   
256    -240   
64     32     
0      0      
208    48     
-176   272    
224    288    
48     160    
-160   -624   
-80    -720   
192    160    
-96    -160   
-160   32     
-256   1040   
48     576    
176    176    
112    -272   
-128   160    
-64    576    
128    -512   
96     -80    
112    16     
-192   -704   
16     160    
144    736    
-112   -192   
304    -144   
-32    192    
-32    224    
-144   32     
400    -448   
-144   464    
240    1184   
368    -112   
-176   240    
64     -128   
-176   -144   
400    -592   
-688   -480   
432    -368   
128    -208   
-224   16     
-48    -544   
512    560    
64     608    
0      112    
-256   -384   
48     256    
160    -848   
32     64     
0      -3056  
-48    -96    
-96    288    
112    304    
112    -64    
-224   160    
-64    -16    
48     -48    
176    32     
-80    -208   
96     -144   
-288   -208   
96     176    
272    -128   
64     32     
-176   -304   
-240   -96    
720    -752   
-16    448    
432    -176   
-352   96     
48     272    
-160   -336   
864    -672   
144    -144   
-112   576    
16     -112   
32     64     
128    -288   
48     256    
-16    -32    
160    48     
-80    368    
112    320    
112    96     
0      -16    
272    -272   
-1056  -160   
688    272    
-96    80     
304    0      
-208   -416   
-64    -48    
288    48     
-80    -64    
80     -288   
96     80     
-144   32     
-96    -1872  
-32    -336   
256    -176   
320    240    
-384   -432   
96     -432   
400    352    
240    496    
-48    0      
-272   32     
128    -304   
320    -1136  
80     272    
-352   -864   
192    16     
96     -432   
-384   352    
384    -144   
-1520  1376   
2080   224    
-96    368    
-592   -384   
464    -1600  
176    80     
-976   -544   
304    -528   
240    -160   
-336   128    
64     -96    
16     80     
16     128    
128    240    
-96    -48    
48     -128   
-336   -352   
336    -336   
-144   -352   
-16    -192   
0      96     
720    -1456  
-1456  400    
1072   208    
176    1200   
48     336    
-64    -208   
112    -224   
112    48     
-448   -592   
-304   -32    
-656   192    
-32    -128   
-144   128    
-16    -144   
336    -224   
-32    -1872  
-352   -64    
304    -160   
128    128    
-160   0      
-64    -16    
336    448    
608    -416   
-608   64     
-80    -688   
240    -336   
-112   0      
112    -496   
128    -336   
256    176    
80     416    
-224   400    
112    -304   
256    -192   
-544   32     
-192   -576   
-96    224    
272    -16    
16     32     
80     -16    
-640   -80    
128    -16    
48     -48    
-16    -16    
224    0      
-144   -448   
576    16     
480    -464   
-1040  -1008  
-1072  -512   
144    384    
-432   464    
-560   -96    
432    96     
784    -672   
-1232  368    
160    -176   
-336   -32    
448    -240   
-160   16     
-208   -400   
-64    192    
160    -608   
-144   64     
-96    96     
-16    0      
32     48     
-224   -288   
-80    160    
-240   -144   
-256   -224   
864    176    
624    -128   
-1088  -240   
160    144    
560    -432   
112    -80    
-176   -176   
160    192    
-576   -80    
400    -16    
-384   -64    
-96    -32    
288    112    
320    128    
-528   0      
144    352    
-432   -48    
80     -16    
144    -16    
-224   -144   
0      -64    
80     -400   
16     -256   
-496   -128   
112    -96    
80     128    
272    112    
-208   112    
-192   288    
48     -384   
-800   -16    
384    -928   
-80    -432   
-144   -32    
-64    -496   
272    64     
-112   -224   
-240   64     
-64    96     
-112   48     
-176   -16    
-368   32     
-80    96     
-80    -144   
32     -576   
-192   -48    
-32    256    
288    64     
-32    144    
-256   -256   
96     -176   
-32    -160   
-16    -96    
-368   896    
-176   -192   
144    -32    
224    608    
-256   320    
1232   2480   
-1760  128    
144    112    
1328   -304   
-1072  -432   
-64    528    
-32    -192   
464    256    
-544   224    
96     -48    
48     -144   
-176   288    
208    -144   
16     272    
-480   64     
144    16     
144    176    
-96    -352   
-96    64     
-32    240    
-112   352    
608    1264   
512    -80    
-1072  32     
368    -320   
-144   208    
-48    32     
16     -272   
48     -496   
-256   224    
128    224    
144    80     
-1504  48     
80     -16    
0      80     
224    144    
-16    -80    
-224   80     
48     80     
-176   96     
48     32     
16     32     
64     176    
144    0      
-560   -128   
336    32     
-224   -64    
-496   -32    
288    160    
-144   -160   
960    -1040  
-2784  -48    
1744   528    
240    -96    
-288   272    
208    -336   
-32    0      
-96    -96    
64     368    
192    -48    
-176   128    
-64    16     
240    64     
-64    -128   
-160   -160   
-64    -16    
-16    -96    
336    128    
-320   -112   
48     192    
64     144    
-96    -896   
-784   528    
784    -400   
16     -640   
-336   224    
-160   192    
96     -112   
-80    48     
-384   48     
16     -32    
160    192    
-80    32     
-96    128    
0      80     
96     80     
-272   0      
48     192    
144    160    
-160   64     
-160   -192   
64     64     
-208   -208   
464    -64    
336    32     
-336   528    
192    -176   
448    -128   
-656   192    
-192   -144   
928    -336   
-320   64     
192    -128   
-48    48     
416    -224   
-640   368    
752    -416   
-784   -80    
48     272    
208    16     
192    32     
-80    80     
-240   64     
-32    -32    
208    240    
416    -320   
-832   352    
32     160    
-96    704    
336    1216   
-944   -1440  
1136   -1760  
1648   928    
-912   800    
-496   -416   
656    -192   
480    -144   
80     464    
-496   -896   
-144   416    
320    -400   
400    720    
-112   240    
-256   -256   
0      224    
544    -560   
-32    -608   
-368   464    
112    16     
320    192    
-112   -176   
-64    -64    
32     304    
-144   -32    
-112   -496   
128    -480   
-224   -416   
144    16     
-240   16     
160    -48    
96     48     
-48    -32    
80     -144   
-16    0      
-112   192    
432    0      
-496   -80    
240    -448   
208    1104   
16     400    
0      176    
-160   -64    
160    368    
80     16     
176    192    
-400   32     
-192   272    
528    64     
80     -160   
-368   -96    
112    416    
400    128    
-992   832    
544    400    
368    1408   
32     576    
-224   -672   
-80    -1152  
-656   -1184  
448    816    
272    496    
224    272    
-96    -16    
-288   48     
320    -112   
32     0      
-16    -224   
-240   368    
144    160    
32     -48    
32     80     
0      -48    
0      112    
-288   96     
240    224    
288    576    
-320   784    
64     384    
304    384    
-16    320    
-240   -96    
48     -752   
-240   0      
-64    256    
192    -480   
-448   32     
160    480    
480    0      
-656   -352   
-48    528    
96     512    
80     -288   
64     16     
-32    -1184  
-256   160    
144    240    
320    192    
-272   144    
-176   240    
-80    224    
64     128    
304    608    
128    512    
-560   -96    
32     592    
128    416    
48     496    
-64    720    
-80    -640   
-96    -304   
176    272    
0      80     
-48    -288   
160    -416   
112    528    
-32    -176   
48     176    
80     16     
-48    -224   
208    352    
224    80     
-16    -144   
-96    240    
336    -128   
-128   96     
240    -1072  
64     128    
-144   128    
80     112    
96     -448   
240    576    
-80    800    
-736   736    
944    32     
-832   -592   
-832   480    
1616   192    
-816   384    
32     -176   
-96    -144   
112    -400   
-112   112    
80     16     
64     112    
144    0      
-432   112    
304    -112   
32     416    
-160   352    
192    224    
144    16     
64     256    
256    -848   
-1088  336    
1088   32     
-208   -288   
-752   144    
384    -208   
336    160    
176    0      
-64    -64    
-144   256    
-224   160    
336    96     
192    80     
-176   -32    
-256   288    
416    304    
-400   0      
320    -112   
-224   -304   
-32    240    
32     208    
576    -272   
-544   448    
672    32     
480    -272   
-80    272    
-48    528    
-416   320    
640    416    
-576   -96    
-80    -64    
-96    -272   
432    128    
496    -224   
-288   -208   
-384   -944   
416    96     
384    -224   
-128   -16    
64     320    
-224   0      
-128   -208   
800    -112   
688    608    
-848   48     
-304   -480   
160    0      
-64    -176   
0      2752   
1696   -528   
-288   -496   
-128   -1328  
-1008  -384   
272    -1152  
352    -352   
-512   -208   
-448   -800   
64     160    
336    -272   
-272   0      
128    -1312  
-224   -160   
448    192    
-288   64     
-48    224    
64     -112   
-144   -192   
16     448    
560    384    
-688   256    
176    0      
96     -320   
-368   16     
960    -288   
-384   -272   
-464   -624   
752    -224   
-176   -48    
-16    -48    
-96    -480   
112    -32    
-336   -272   
576    32     
-768   -208   
352    -144   
-128   80     
-144   -112   
-320   -112   
432    144    
-64    -96    
-144   80     
-64    80     
176    -1408  
-192   -48    
592    176    
-768   208    
192    128    
208    -32    
-160   96     
208    -128   
-288   480    
1072   -112   
-608   0      
448    -16    
160    0      
-192   -80    
208    -48    
-64    -240   
-48    -32    
0      48     
80     96     
-48    -48    
144    -16    
96     80     
-64    -64    
-448   144    
512    192    
-208   144    
-304   64     
224    -272   
160    -400   
-416   -80    
48     -384   
64     -176   
272    -496   
-192   208    
32     -416   
-16    -816   
16     -80    
-480   640    
1712   -736   
-1296  64     
-288   -160   
992    224    
-512   -112   
-32    -160   
-272   160    
496    -720   
80     240    
-16    -288   
-128   -112   
-16    -64    
224    -320   
160    144    
-176   96     
64     -224   
-16    -80    
-80    0      
208    -96    
576    1056   
-1440  336    
512    -32    
736    0      
-288   -112   
128    -512   
-320   96     
80     -160   
128    -128   
144    -48    
-112   -144   
-752   160    
416    -32    
-96    192    
-288   48     
64     -160   
-48    -128   
-112   -96    
192    -304   
272    288    
-288   -320   
-240   560    
272    48     
-112   -64    
128    -400   
-272   -48    
0      16     
160    144    
-208   -16    
-336   -720   
-864   416    
1168   -656   
-592   -96    
32     -16    
160    0      
-80    -192   
720    -656   
-224   -240   
-192   -320   
-16    -80    
112    -48    
-48    64     
-48    16     
-16    176    
400    80     
-272   112    
-112   -256   
336    64     
-144   -96    
-16    80     
80     432    
-96    -832   
-1872  80     
1744   -320   
-416   144    
-832   -144   
304    -928   
-624   -336   
336    208    
-64    -160   
-32    160    
-48    160    
-112   96     
-304   -288   
-48    -192   
16     -160   
-48    48     
-96    -560   
-368   -576   
-48    -224   
-64    16     
-80    16     
-864   -912   
512    -1360  
-640   -480   
80     224    
64     -672   
-608   208    
464    -128   
368    944    
-96    48     
-336   400    
112    160    
-128   0      
240    496    
704    736    
224    -208   
224    464    
224    208    
-80    -208   
-16    48     
-176   -240   
-160   16     
192    -192   
16     -48    
-32    240    
560    240    
128    -528   
-320   -96    
384    16     
1088   1872   
-2064  160    
-352   64     
880    672    
688    736    
-768   1072   
-560   -1328  
96     -1680  
432    496    
32     -640   
64     128    
-416   192    
32     272    
352    240    
-112   304    
-400   208    
-80    -96    
144    -448   
80     -320   
-240   -528   
-352   -384   
0      -160   
640    192    
0      -48    
-816   256    
320    624    
-208   -672   
352    -1168  
-32    944    
-32    736    
-32    144    
-288   -192   
240    432    
64     992    
-544   848    
112    -384   
-656   -144   
-208   272    
96     32     
-176   -176   
16     -128   
128    192    
16     304    
96     -352   
-400   -752   
496    464    
-416   0      
-48    -448   
-560   -416   
-32    -16    
176    -208   
-32    0      
-608   256    
-432   -160   
272    -48    
112    -80    
-224   -576   
208    -1824  
-336   -240   
128    1168   
-112   336    
64     -144   
48     176    
64     80     
0      496    
-304   640    
-96    96     
240    -48    
80     96     
-96    464    
-208   160    
144    -336   
144    -128   
0      -48    
-16    48     
-48    -416   
-288   -1104  
320    -304   
128    400    
-320   144    
736    1264   
-1248  1552   
192    -240   
496    -640   
-112   -576   
-240   736    
752    368    
-96    288    
-240   608    
0      80     
-48    112    
144    32     
-16    -288   
-144   544    
-336   96     
240    -80    
224    -240   
-304   32     
-32    128    
96     64     
400    704    
-592   688    
480    -112   
-320   432    
-64    -96    
-48    -32    
128    624    
96     192    
-144   160    
80     -64    
-80    112    
0      112    
48     -160   
208    -80    
-320   336    
496    720    
-144   624    
-176   -48    
-128   48     
224    32     
-144   128    
-80    112    
240    32     
-96    144    
-16    -176   
-304   64     
320    -80    
-16    208    
32     80     
16     240    
-928   1248   
1232   576    
-224   256    
-560   -272   
336    384    
896    160    
-592   384    
-32    -240   
512    192    
-432   -128   
176    224    
96     48     
-128   160    
192    -112   
-288   80     
304    -96    
-192   256    
544    96     
-160   144    
240    96     
64     112    
-48    -144   
-1536  864    
1024   160    
-416   144    
240    32     
-176   80     
-240   192    
0      272    
96     272    
192    96     
80     80     
-144   16     
-16    80     
-32    -16    
-176   112    
256    -112   
48     304    
96     -576   
-240   288    
-16    32     
-176   -48    
640    320    
1264   496    
-1072  -80    
-1168  352    
800    -128   
528    -48    
-336   -336   
-176   688    
-256   64     
304    144    
304    176    
-688   -688   
32     448    
688    -608   
144    480    
-352   96     
-576   240    
-48    192    
448    -32    
592    448    
-352   304    
-640   -64    
816    64     
-96    -640   
-224   -32    
-48    96     
256    -160   
768    576    
304    -4080  
-2480  -176   
1200   -352   
1680   544    
0      368    
-1376  160    
336    -320   
672    592    
-144   -80    
-176   480    
560    -80    
-528   -96    
272    32     
224    16     
176    -144   
-176   0      
576    16     
-656   -2384  
288    32     
832    -1248  
-624   112    
528    -16    
-496   112    
368    176    
192    48     
-608   32     
704    -48    
-48    224    
-304   16     
176    464    
144    32     
-48    352    
176    -560   
-464   -208   
16     -448   
432    352    
-128   176    
-80    352    
384    112    
-32    144    
160    80     
-240   -48    
144    160    
128    -192   
-112   32     
-144   -336   
96     48     
-64    -320   
336    640    
448    512    
-144   144    
176    496    
-544   256    
496    256    
-368   240    
48     -16    
208    -272   
-80    192    
-96    -1024  
256    -336   
-64    -400   
32     96     
96     48     
128    400    
16     -800   
-16    80     
-128   0      
32     -288   
-160   -272   
32     -384   
144    -64    
-64    -112   
192    400    
176    16     
16     368    
-304   -32    
160    16     
224    -688   
-80    -208   
-64    128    
-128   336    
1424   2208   
736    -912   
-1680  -336   
544    -176   
192    -2480  
496    -448   
-64    -416   
-304   -320   
96     64     
64     -144   
336    -336   
-128   -448   
-144   416    
176    416    
240    -416   
-144   -768   
-224   -592   
192    -912   
-1040  -384   
96     -32    
240    -304   
-96    640    
0      -816   
-160   -720   
144    256    
-192   128    
96     48     
-48    -96    
352    -240   
-192   96     
0      112    
16     192    
16     176    
-64    -240   
128    80     
64     32     
-64    -128   
304    -176   
-48    -384   
48     -128   
-176   240    
208    -192   
-192   -560   
-144   48     
112    -176   
-144   -16    
144    -128   
-112   208    
32     16     
128    64     
-608   1520   
2960   -1040  
-1344  -144   
-480   -944   
1296   368    
-272   -1536  
-608   720    
752    -512   
-352   -1184  
-48    208    
288    480    
-16    32     
-192   -336   
-96    -240   
256    -128   
-720   128    
96     0      
128    -32    
-48    -112   
64     -176   
752    1008   
-1280  -976   
-1536  384    
2640   -352   
-608   -160   
-592   1264   
816    800    
256    672    
-320   112    
128    -80    
-176   -64    
-272   304    
288    -64    
224    -144   
-96    240    
-224   -176   
240    320    
-48    -176   
224    1696   
592    368    
-336   -240   
-320   -464   
272    80     
-352   -496   
-288   -704   
432    -128   
-528   -256   
-1008  144    
624    -80    
-192   384    
384    -752   
32     128    
576    -1600  
-608   208    
128    272    
-32    64     
-416   672    
592    464    
-992   -416   
160    -544   
-64    -288   
-128   -176   
-272   -256   
-512   -288   
112    48     
192    -320   
32     16     
-160   -1056  
-96    -256   
512    176    
896    736    
-2704  -416   
928    784    
1168   704    
-512   992    
-256   1040   
-144   1184   
160    80     
384    -96    
32     -336   
-240   192    
-416   -512   
368    -80    
384    -16    
-640   352    
-48    368    
432    160    
-192   -432   
-160   -496   
32     272    
-48    448    
16     -192   
512    512    
-384   32     
-368   -80    
800    -368   
-240   160    
432    1152   
-1072  1008   
544    448    
-1488  -192   
-320   -160   
-64    -496   
0      240    
80     240    
112    272    
-288   -960   
-784   -240   
-656   -192   
32     -352   
-672   -240   
160    688    
-144   480    
176    -320   
-240   -432   
-96    784    
-624   -352   
0      160    
368    304    
-144   -320   
-368   -976   
480    -944   
-624   272    
32     -1472  
1232   -944   
64     208    
-176   1216   
192    -464   
48     -640   
-320   -800   
-320   208    
64     -32    
-208   -448   
-112   528    
-48    560    
-32    400    
208    160    
112    -128   
-128   -304   
-48    960    
320    384    
-160   240    
-64    256    
144    352    
144    -160   
-384   -448   
192    -256   
160    336    
-96    272    
-656   240    
416    1760   
-1280  -880   
192    64     
528    -192   
-528   -112   
-288   -1040  
48     -720   
256    -992   
-32    -96    
-96    320    
-32    592    
-48    80     
-48    128    
-48    -432   
64     -160   
-96    464    
96     -176   
-192   -32    
-64    -176   
176    160    
144    544    
-736   -432   
208    176    
800    192    
-800   -16    
16     352    
80     0      
-80    64     
112    -208   
-192   192    
224    160    
-752   160    
480    -96    
96     -48    
16     48     
-272   64     
48     112    
144    -96    
256    16     
-352   48     
64     240    
-48    96     
-112   64     
48     -256   
-224   16     
-32    -144   
-96    192    
80     112    
-1040  0      
368    48     
-1808  -432   
1920   832    
512    -240   
-1568  -80    
592    304    
352    48     
-176   0      
-48    -32    
-48    -64    
-192   64     
144    176    
64     64     
-144   80     
-448   0      
384    112    
-112   64     
-112   32     
208    64     
-112   0      
-48    96     
-64    64     
-592   -464   
672    -320   
416    -176   
-960   -592   
-272   832    
448    240    
48     48     
-128   -80    
-144   80     
144    96     
272    64     
-64    16     
-112   -48    
-256   0      
64     112    
416    16     
-80    -272   
-336   144    
80     160    
928    32     
-336   896    
-832   -96    
-128   288    
880    -160   
-512   384    
-240   0      
688    -352   
672    448    
0      640    
240    512    
160    624    
-368   432    
736    256    
-176   -144   
-288   320    
-400   224    
704    272    
320    -464   
448    -256   
-128   0      
-16    256    
160    288    
-208   -272   
-48    32     
144    -272   
-224   144    
256    48     
128    32     
-240   -576   
-688   2160   
1472   -96    
-1952  208    
432    -64    
96     -224   
-448   96     
576    432    
16     -128   
-176   352    
208    112    
-336   32     
304    16     
-240   -64    
160    192    
96     -96    
-256   256    
-16    112    
-96    96     
160    -256   
-672   -272   
480    -64    
-176   16     
432    -48    
464    -64    
-496   128    
-192   208    
368    224    
16     -48    
-160   -64    
-384   -160   
320    144    
112    432    
-320   160    
192    176    
368    -208   
-176   -224   
-224   32     
112    208    
176    160    
-64    80     
-192   256    
224    336    
-96    320    
288    464    
-96    176    
-64    -352   
96     -32    
-48    -48    
288    160    
-208   368    
-96    448    
496    704    
208    -320   
-320   -752   
-128   -992   
-32    0      
384    640    
-160   320    
160    288    
64     144    
-368   64     
128    1120   
928    720    
-528   704    
48     768    
-96    112    
480    336    
-16    448    
-112   672    
0      112    
0      -176   
16     16     
-16    32     
128    208    
-48    224    
48     -112   
0      -464   
176    -320   
-64    80     
0      160    
640    1568   
-1248  192    
512    -304   
512    496    
-416   -96    
112    -288   
0      320    
160    160    
-96    32     
160    -48    
-48    -528   
96     528    
176    -448   
48     -112   
-64    0      
128    64     
288    192    
-176   192    
16     144    
192    -256   
-128   -224   
608    -176   
-640   512    
432    -848   
0      -208   
-128   -144   
592    560    
-400   544    
112    -336   
464    -1488  
-288   288    
-80    208    
-224   288    
144    48     
64     256    
-112   -48    
-144   192    
176    96     
128    -128   
-32    -32    
-176   -16    
80     48     
112    -96    
224    176    
-208   -16    
-144   48     
240    -288   
208    0      
-32    80     
-368   240    
992    -352   
-3024  -464   
976    496    
384    0      
-1040  -256   
224    -224   
96     -272   
-352   336    
336    -1168  
288    -176   
0      592    
-64    96     
144    -64    
16     96     
16     192    
48     272    
32     -80    
160    400    
288    -352   
0      240    
-512   -1088  
1760   416    
-1200  -272   
304    -176   
-288   -80    
-48    928    
368    144    
288    1840   
240    1312   
-448   -416   
320    -720   
-48    -544   
-176   80     
224    -912   
-448   -336   
480    -160   
144    -320   
-576   -1648  
-112   -848   
144    -576   
64     416    
32     -96    
176    176    
176    944    
-240   176    
-592   -16    
784    -704   
704    -1408  
-608   -432   
416    -2240  
128    -160   
-96    128    
80     -480   
112    0      
352    -432   
-128   -656   
-80    368    
-208   -368   
224    -592   
272    -672   
96     -464   
-1280  -112   
-240   -32    
240    -656   
-240   -592   
272    112    
288    -768   
224    560    
-208   912    
-176   352    
1616   1760   
-1696  640    
-64    80     
1408   -368   
-480   -224   
-832   -640   
144    32     
464    -80    
96     176    
-224   -176   
96     592    
-64    -848   
80     -528   
-16    752    
-16    496    
48     128    
192    -224   
384    -176   
-208   80     
-400   -304   
96     -256   
-16    -448   
128    304    
1392   992    
-1424  304    
480    624    
560    -192   
48     -32    
-384   -336   
-272   -128   
560    -272   
-304   -96    
-32    -80    
272    208    
272    80     
-160   112    
-272   272    
112    64     
-496   -160   
240    112    
-736   -320   
192    -112   
480    288    
64     -144   
144    192    
-112   -144   
144    -384   
-640   -544   
352    -352   
80     -48    
-16    112    
-256   -32    
384    -400   
-176   -144   
-128   -80    
432    496    
-656   256    
176    -512   
-192   -800   
304    16     
-192   -800   
-224   -176   
368    -80    
48     -80    
-192   -16    
48     64     
-320   -224   
128    144    
-80    224    
192    -160   
-1184  -272   
-128   -112   
160    112    
128    -160   
160    64     
-208   -400   
-224   96     
400    192    
160    -64    
-256   -48    
-688   -1024  
1600   -864   
-1152  400    
16     -272   
-368   -32    
-304   464    
320    -144   
320    128    
224    480    
-224   -304   
-128   -176   
432    -320   
-128   16     
-32    -112   
-304   224    
48     -80    
160    -128   
128    64     
-208   -112   
-48    80     
48     240    
48     1184   
1056   -416   
-928   -480   
64     96     
768    -336   
-400   384    
400    -384   
-288   -16    
0      -336   
-208   208    
320    0      
256    80     
-432   48     
96     80     
-160   -192   
144    -144   
0      144    
-352   -48    
-576   96     
-224   -96    
160    112    
16     64     
-176   -16    
-288   -384   
0      32     
192    -32    
-192   240    
256    80     
-128   -48    
-160   -32    
-608   -304   
-128   224    
192    48     
688    656    
-960   -416   
-336   208    
576    -320   
-1104  -64    
192    -64    
160    80     
176    64     
-928   -48    
48     144    
-416   -224   
256    224    
16     -112   
-64    96     
-192   32     
224    48     
-144   48     
96     -64    
-1168  832    
528    -48    
-800   -464   
64     -176   
592    -144   
-1424  -16    
112    -144   
176    -192   
-80    80     
-288   -80    
80     160    
112    -352   
-208   80     
-32    16     
-224   112    
304    128    
-176   -128   
16     64     
16     96     
-80    80     
-768   -480   
560    336    
-816   -192   
-656   16     
592    -96    
464    912    
-144   48     
-880   -192   
448    -64    
320    48     
-448   80     
-64    32     
432    544    
-432   288    
-272   -96    
-192   144    
-160   208    
144    -384   
-480   272    
-384   -112   
352    80     
112    64     
-96    32     
32     352    
-400   352    
432    -16    
176    48     
-624   -224   
2384   2928   
-1664  1648   
528    160    
1472   -192   
-1040  -96    
-336   0      
176    0      
992    288    
64     48     
-864   80     
448    32     
32     80     
224    32     
192    208    
-400   32     
80     272    
416    -48    
-272   -16    
-160   128    
336    1504   
464    544    
-960   -384   
160    -272   
-304   -16    
-720   -256   
1120   176    
32     80     
-384   416    
-128   352    
304    -128   
-16    -544   
-544   -176   
336    -160   
48     -128   
-272   48     
-96    -272   
-480   -640   
-48    -272   
240    -144   
16     160    
-240   -80    
112    -128   
192    -288   
-224   -208   
112    -288   
-224   -96    
288    128    
-288   -160   
-384   -192   
160    16     
416    400    
96     736    
-304   -16    
-784   32     
400    -336   
192    -432   
-640   -288   
-64    -544   
-144   -544   
128    -704   
16     624    
64     704    
-80    -32    
-96    192    
-96    -80    
-32    -272   
32     128    
-256   256    
-96    -272   
96     112    
80     -144   
-176   160    
-16    64     
-160   160    
128    144    
-16    64     
-80    288    
-112   800    
0      752    
-384   64     
240    -80    
80     256    
96     -368   
-112   -176   
352    -240   
176    0      
-144   16     
-32    112    
48     128    
-48    128    
0      208    
-144   160    
-96    -224   
208    128    
208    32     
-176   16     
-112   64     
240    -16    
144    336    
16     32     
-80    -64    
640    160    
-1328  400    
688    -144   
48     544    
48     -256   
-384   64     
-208   80     
672    -640   
256    -160   
16     -16    
-464   304    
16     -96    
384    192    
96     208    
-176   -16    
-16    128    
192    112    
-144   80     
48     160    
-32    32     
176    -112   
-208   -32    
80     -1440  
32     32     
-288   640    
512    272    
-192   176    
176    -288   
416    -528   
-352   -64    
-352   -960   
-1792  208    
2000   256    
-1072  -96    
80     -672   
448    -368   
-496   -640   
272    -2448  
368    -384   
240    1168   
-128   176    
-240   -128   
208    352    
96     -160   
-16    368    
-16    240    
16     -112   
208    384    
128    -224   
-64    304    
-32    272    
752    -352   
-1696  160    
1104   48     
144    -16    
-784   1232   
-464   -240   
960    256    
-256   1040   
-416   496    
416    -352   
-240   -480   
-48    -448   
384    -432   
-112   -384   
80     208    
128    240    
-160   256    
480    464    
-32    -880   
-192   192    
96     80     
208    384    
-128   160    
-656   1152   
976    -448   
-176   -880   
384    -944   
192    448    
-192   -528   
-624   -64    
144    112    
272    0      
480    304    
-208   -32    
48     16     
240    -1504  
-256   -112   
896    -448   
-480   368    
64     16     
64     128    
96     -368   
-64    80     
16     288    
-32    96     
336    208    
496    -128   
-816   -976   
-192   -528   
-512   1104   
-352   80     
-352   -32    
-496   -576   
1680   1024   
-544   368    
-368   112    
448    -144   
112    448    
256    320    
80     272    
-464   -144   
256    144    
336    -48    
-112   -592   
160    -96    
-96    -480   
432    128    
-48    816    
512    848    
-336   80     
-80    -304   
352    144    
-544   64     
0      96     
384    -272   
-416   32     
320    -128   
-768   -480   
592    -608   
-416   -176   
144    -128   
-320   -208   
112    -224   
112    144    
-32    -64    
-416   -80    
176    -192   
176    -304   
0      96     
32     -80    
-16    0      
-368   -320   
464    208    
-48    32     
-304   128    
-16    -48    
240    -32    
112    368    
-80    240    
-240   144    
432    752    
-464   384    
-320   -432   
64     -1840  
-48    -112   
-128   112    
192    -48    
208    704    
416    32     
-240   144    
-160   -80    
288    0      
112    80     
64     -736   
-208   96     
112    -800   
144    160    
-32    272    
64     -256   
-144   -160   
96     -400   
176    -16    
96     256    
-128   -272   
16     144    
-64    -128   
240    -80    
64     144    
-128   -64    
848    -368   
-2544  448    
1296   -352   
-320   -736   
-1056  656    
576    -192   
-336   96     
384    -352   
-48    -432   
224    80     
-224   -16    
-128   176    
352    -48    
256    176    
-672   368    
288    -48    
144    -352   
-80    -256   
-336   0      
64     32     
-192   -464   
336    -1264  
-528   160    
704    -784   
464    -96    
-800   -1504  
288    64     
480    -128   
-160   -176   
-320   -176   
304    112    
-192   48     
128    -80    
-176   0      
-96    -160   
-160   -80    
416    -416   
-368   -16    
480    -32    
-192   144    
320    -448   
-304   128    
304    -224   
-112   32     
256    32     
176    -80    
-528   192    
512    -144   
-192   -16    
-432   -1280  
1088   1440   
1136   -576   
-1632  192    
560    -544   
-272   0      
528    -352   
-272   -160   
432    -624   
-432   -80    
-256   112    
272    0      
128    -80    
-96    -208   
-240   -112   
544    128    
-336   0      
80     -16    
144    0      
240    -192   
176    48     
-80    -128   
-656   -112   
928    -720   
416    -304   
-912   128    
528    448    
16     -144   
16     448    
-144   -240   
-576   96     
224    16     
240    -224   
-256   -32    
-112   -160   
272    16     
-112   16     
320    0      
-80    -32    
352    544    
336    -160   
-144   -144   
0      304    
-320   -32    
-112   240    
1040   -64    
-656   32     
-288   -672   
-144   240    
464    -32    
-176   -112   
256    -32    
256    48     
-256   -912   
-32    -144   
320    -48    
240    192    
-496   112    
-192   80     
624    48     
-624   -64    
-48    48     
224    16     
-128   32     
240    -352   
-256   208    
16     16     
-240   80     
-256   -320   
-16    -304   
768    -528   
-1696  -2496  
-1648  -512   
976    16     
-272   240    
624    176    
-32    -32    
-784   288    
96     -80    
176    -480   
80     -16    
-928   -80    
-320   48     
416    272    
16     -256   
-416   112    
-480   -144   
64     -32    
-480   -112   
-128   -368   
-336   -592   
256    -48    
-32    -224   
32     560    
576    -576   
-736   -128   
80     -128   
144    48     
16     -336   
-576   -864   
96     -272   
96     432    
-128   -208   
-336   -368   
-16    -96    
-800   176    
-352   32     
400    -64    
-768   -864   
-320   -912   
288    128    
16     48     
-256   -112   
-192   -16    
560    608    
-416   560    
64     -400   
160    -1280  
-576   -144   
432    1040   
-320   -48    
160    -176   
-288   544    
976    -544   
-624   544    
528    1008   
272    496    
-384   -80    
304    224    
-144   0      
144    64     
-32    -32    
-96    144    
-32    112    
80     -112   
0      400    
16     528    
-672   272    
464    -80    
16     -192   
-160   192    
16     48     
-128   80     
160    -32    
160    176    
-240   64     
-144   32     
-96    0      
208    -48    
96     176    
-96    -64    
-64    128    
-1312  272    
864    -448   
-848   -96    
240    -160   
0      512    
32     96     
-80    -176   
240    -304   
-64    80     
96     160    
128    80     
-48    -16    
-208   -48    
-48    336    
352    80     
-384   -512   
80     -272   
-32    224    
96     80     
-144   -288   
784    -656   
-368   640    
-16    -144   
-64    352    
16     16     
32     -80    
-176   368    
80     240    
-352   -400   
-96    -16    
416    352    
-80    112    
-912   -320   
192    -176   
0      336    
-144   288    
-144   624    
-128   192    
-176   -272   
192    16     
-80    -272   
32     -336   
112    -144   
64     -320   
-32    272    
144    -128   
-128   -208   
352    16     
-368   416    
1168   384    
-2544  512    
0      -48    
192    144    
64     288    
-304   496    
-16    528    
192    976    
720    -1376  
-288   -1216  
-192   768    
-16    304    
-64    -128   
304    -208   
64     96     
-384   336    
128    96     
304    -48    
-176   -64    
-80    352    
-288   -368   
1120   1072   
384    -16    
-768   288    
976    208    
-240   288    
16     -464   
-400   672    
704    -304   
-304   -144   
-304   -16    
320    144    
160    416    
-192   96     
-256   80     
592    32     
-240   112    
-80    -160   
-384   432    
-80    -64    
160    0      
32     -272   
384    -320   
272    144    
32     976    
-944   720    
80     -144   
240    160    
-80    176    
320    304    
-1072  512    
272    -176   
144    0      
-128   96     
-272   16     
0      544    
1024   912    
-928   288    
-304   -80    
160    128    
-112   128    
-16    64     
320    -16    
-624   144    
416    -112   
-64    208    
256    32     
-64    64     
-256   32     
656    1216   
864    -2336  
-2512  -640   
320    48     
320    128    
688    112    
-336   80     
-352   -432   
256    480    
272    -144   
80     32     
-32    96     
-16    -16    
-336   112    
512    128    
16     -304   
-384   -1648  
64     224    
16     0      
624    496    
-800   288    
496    448    
240    -32    
-176   208    
-80    -112   
80     192    
496    -80    
-240   304    
-144   -160   
0      -208   
-112   32     
80     -304   
80     176    
160    -32    
192    -96    
80     0      
-256   -32    
320    16     
512    272    
112    -16    
-192   336    
256    144    
-272   -48    
96     -176   
48     -80    
-288   144    
224    -288   
112    32     
304    -1872  
-464   -192   
176    0      
368    112    
96     736    
-800   480    
128    -112   
432    -528   
-880   -128   
832    416    
-496   336    
48     560    
-32    256    
144    -336   
128    0      
-224   -1824  
112    336    
-224   400    
320    208    
48     80     
112    208    
-336   352    
-48    160    
288    0      
144    144    
-64    32     
-96    96     
176    -64    
-192   -64    
128    0      
-80    -96    
128    16     
-64    160    
-416   -1008  
960    -1712  
-784   528    
688    -256   
-272   144    
-192   384    
320    -160   
288    800    
-144   -112   
-480   -192   
384    -176   
112    192    
112    -80    
-64    160    
32     -96    
176    64     
-208   0      
160    224    
-16    128    
-80    304    
0      16     
-256   224    
1120   -384   
-672   -96    
-496   192    
960    -48    
-16    208    
-192   -656   
-192   -80    
-16    -320   
464    160    
96     96     
-304   128    
-16    -48    
384    336    
-176   80     
64     -880   
-64    0      
-320   144    
640    0      
-464   208    
224    48     
-48    -256   
48     16     
160    80     
-16    128    
-304   240    
384    16     
-64    -16    
-48    112    
544    784    
-1024  704    
-576   352    
1120   -256   
-336   -208   
-256   -240   
704    352    
-208   112    
-240   176    
560    -64    
32     208    
-336   -64    
-32    304    
144    -96    
272    -2224  
-560   16     
416    -16    
-208   -1024  
16     -48    
144    -736   
-208   -144   
16     32     
768    -528   
-1392  16     
912    -720   
480    -256   
-384   352    
-64    -1088  
432    -144   
320    208    
-112   -320   
-176   -32    
-208   -864   
208    -48    
192    -160   
0      160    
208    -1248  
-64    336    
-624   128    
256    -128   
256    128    
-272   224    
-608   -304   
1264   -560   
-416   304    
-400   -352   
-320   -208   
208    192    
-304   -80    
-272   -112   
208    -128   
144    -544   
0      -32    
-48    -288   
-32    -192   
32     -160   
-528   352    
880    -80    
-16    -64    
224    64     
176    -192   
-624   96     
144    96     
32     -48    
-48    32     
-16    -304   
560    16     
400    112    
-272   -1024  
336    432    
80     208    
224    2304   
1184   -80    
-1936  -912   
-608   -240   
2032   192    
-848   -672   
112    -2032  
416    144    
208    336    
-592   368    
160    -16    
-64    -48    
-176   -560   
224    432    
224    16     
-288   736    
176    -240   
512    -80    
-304   576    
0      -64    
-112   -528   
160    -400   
-240   -656   
-48    -1328  
-96    -576   
96     400    
-48    976    
32     -16    
-96    336    
192    -1008  
96     -320   
-240   192    
96     624    
16     128    
144    80     
-64    448    
224    1024   
-128   768    
-96    64     
-352   -32    
-64    -272   
0      224    
-32    224    
-48    -16    
480    -1728  
-144   64     
0      -16    
-416   -688   
128    -144   
-176   -48    
-304   -512   
576    -48    
-432   176    
224    352    
-128   576    
64     256    
-128   -640   
-240   -1440  
256    272    
96     400    
144    208    
-480   -304   
-192   -16    
-288   16     
96     160    
-224   384    
112    176    
-352   160    
-240   128    
-512   -112   
-224   80     
368    112    
-240   -64    
128    96     
176    -320   
176    -64    
-224   112    
96     96     
272    -112   
160    80     
-352   -320   
320    -400   
-16    496    
448    -304   
-464   368    
-32    -32    
256    -224   
-800   -208   
-112   144    
-96    224    
-32    96     
288    -48    
-96    176    
-16    160    
-80    -64    
256    176    
-32    416    
96     512    
-96    400    
-96    -16    
352    -272   
-928   768    
352    -384   
272    0      
80     -352   
-256   176    
-352   -208   
288    -832   
176    -16    
-576   -224   
-176   -208   
-176   -16    
48     -16    
-144   -128   
-64    416    
-32    -256   
-304   -112   
-16    -16    
176    656    
352    -624   
-720   -720   
-160   768    
0      144    
304    -432   
-144   96     
-128   112    
240    0      
-176   240    
0      -64    
-224   32     
-864   -1328  
-464   592    
1328   -288   
-96    32     
-2128  1136   
1248   -432   
-512   368    
-736   416    
128    -16    
-112   -160   
-128   368    
-112   -16    
-48    32     
32     -16    
240    96     
-16    16     
-160   -112   
-64    -336   
0      -192   
-48    96     
-480   -672   
1344   496    
-960   -112   
-336   64     
816    -176   
-832   32     
-32    448    
832    -48    
-496   -96    
-48    240    
-80    -208   
96     128    
16     -16    
-128   -48    
432    112    
80     176    
-336   32     
64     128    
464    -64    
-192   80     
-128   224    
240    576    
-752   400    
-80    -464   
176    176    
96     528    
-160   112    
96     352    
-560   128    
-128   -32    
496    -96    
128    96     
-272   224    
208    -144   
-432   400    
32     256    
-432   -224   
480    128    
224    -48    
-656   -64    
80     160    
288    96     
48     0      
-128   48     
-224   48     
-80    752    
1328   48     
-992   -48    
-208   272    
-784   432    
-800   -640   
-576   160    
-592   -160   
0      -192   
896    240    
192    32     
-1136  416    
176    80     
288    160    
64     -48    
208    -16    
-288   -224   
-80    192    
16     80     
-80    -32    
-240   -48    
128    64     
160    64     
352    624    
-1008  144    
512    496    
272    -384   
-496   176    
576    16     
288    112    
-176   80     
-32    336    
560    -128   
-576   256    
416    -96    
-192   144    
64     -112   
-32    64     
480    -64    
-1008  -160   
384    176    
352    160    
-368   64     
-192   48     
80     240    
32     32     
224    320    
-336   -96    
160    -96    
208    -16    
64     -48    
-240   48     
128    48     
-176   16     
384    208    
-80    144    
-400   -704   
-224   -32    
496    96     
-112   448    
304    320    
-96    -304   
32     -448   
16     -192   
48     -224   
-96    128    
-160   0      
208    128    
144    128    
-32    -32    
-336   368    
32     -336   
64     304    
320    1072   
384    64     
-544   -64    
48     288    
128    192    
160    -96    
-192   -64    
48     96     
-480   272    
352    -192   
208    -384   
-224   224    
1040   1984   
-2224  160    
240    0      
992    -304   
-256   -176   
-192   256    
-208   -64    
624    96     
-80    288    
-96    -240   
-112   144    
-144   144    
352    -2144  
-48    128    
-240   -816   
64     448    
160    368    
-128   -224   
208    -464   
16     80     
-256   -112   
656    -80    
-352   128    
-336   -16    
416    48     
-192   96     
32     0      
256    -1328  
192    48     
-512   400    
-80    96     
288    240    
336    -80    
-304   32     
-32    -48    
224    128    
-16    112    
112    192    
16     64     
-208   -208   
224    112    
48     64     
80     -736   
0      64     
-48    80     
80     144    
32     160    
-160   144    
224    64     
160    -32    
-800   -1792  
-1024  -192   
1920   -544   
-1008  -64    
64     -96    
864    48     
-976   -336   
320    -464   
192    -128   
-16    -512   
-32    224    
224    112    
-368   -16    
144    -112   
48     224    
48     -48    
-32    48     
320    64     
128    -144   
-224   64     
176    -16    
-448   -512   
1088   -464   
-192   -784   
-1712  -752   
1024   432    
-112   -480   
-16    -144   
96     256    
-224   368    
688    -192   
32     64     
-208   0      
192    224    
80     224    
-224   -80    
224    96     
-336   -160   
128    0      
80     -240   
256    -304   
-32    -672   
672    608    
-720   288    
832    -496   
-704   208    
-128   528    
1280   -672   
-288   96     
-288   304    
448    -304   
64     128    
256    -176   
128    496    
-80    -112   
-368   -240   
672    544    
-464   752    
-336   -448   
752    -80    
320    80     
-48    32     
-352   32     
304    320    
288    0      
272    -720   
-528   -352   
48     -320   
896    -288   
-320   -448   
-112   192    
1456   -976   
-112   -1072  
560    1008   
336    1504   
-832   304    
112    -960   
816    -1568  
-416   -624   
-416   -240   
96     752    
672    96     
336    -64    
-176   -16    
-240   -224   
448    560    
-16    240    
32     -64    
112    -560   
-16    -128   
-240   -320   
0      -96    
176    -32    
64     -192   
-400   -464   
352    -736   
208    528    
-80    1360   
320    -48    
96     96     
32     304    
-64    -48    
32     256    
-16    16     
288    -1808  
-48    160    
96     -1152  
192    176    
-208   -176   
240    -960   
64     -368   
-336   -304   
144    -80    
96     368    
464    304    
-304   64     
-208   -144   
384    288    
80     448    
256    -128   
-368   64     
-352   784    
1408   -672   
-480   608    
0      1056   
32     320    
432    336    
-336   832    
-336   -1840  
448    -272   
160    80     
-160   -352   
96     -336   
-112   240    
48     16     
240    272    
-192   -224   
48     -960   
16     -48    
192    688    
-240   -368   
48     -16    
304    -112   
-160   0      
48     -240   
-112   -576   
-96    -464   
688    -1296  
560    -320   
-544   112    
-96    96     
112    880    
256    272    
-192   -592   
-240   -560   
0      -528   
128    -16    
112    192    
304    -432   
-48    -416   
-192   -1488  
160    48     
240    -288   
-16    -176   
-16    -176   
-48    -128   
-48    -288   
368    -224   
-160   -144   
-304   -48    
-1616  -464   
736    -256   
64     -176   
-320   208    
368    1632   
144    432    
-160   -128   
176    -592   
-176   400    
-16    224    
240    -192   
272    0      
-32    -256   
-240   -48    
112    32     
-272   32     
272    -128   
-624   208    
48     -224   
112    256    
128    -320   
-192   240    
-48    -464   
256    -96    
64     256    
176    -112   
-272   112    
416    0      
-256   16     
-528   -416   
1440   592    
128    32     
-2416  -80    
1648   -80    
0      0      
-976   -192   
384    256    
96     -1008  
16     112    
0      96     
-32    -192   
160    -16    
-144   -192   
-32    -128   
-208   32     
208    16     
-128   -176   
-176   112    
160    -384   
0      144    
0      -224   
112    -464   
-1152  400    
1488   32     
-1008  -80    
640    -48    
-32    48     
-336   112    
48     368    
-320   128    
-112   -80    
256    -64    
-592   -32    
96     0      
-32    -176   
448    304    
112    -80    
-800   -736   
256    -672   
16     -224   
304    32     
-48    -16    
96     352    
-240   64     
272    176    
80     272    
-80    128    
64     688    
-624   -112   
256    160    
400    -464   
-32    -80    
-736   -96    
144    176    
416    48     
-480   -256   
336    -368   
-608   -240   
-112   -208   
560    -240   
416    48     
-288   128    
-464   96     
-64    -272   
448    224    
64     -528   
-1040  256    
288    80     
-400   128    
192    272    
2144   80     
-3312  -48    
1264   352    
1696   160    
-1744  -80    
-160   48     
304    -320   
448    16     
-224   -224   
48     256    
160    -32    
336    288    
-496   368    
16     32     
-224   -96    
80     32     
144    128    
-256   80     
-512   -336   
512    528    
160    -128   
-688   16     
288    240    
-448   0      
0      96     
752    48     
-352   16     
-96    400    
-304   -16    
192    448    
112    -112   
-272   368    
96     -240   
-352   -32    
-592   -224   
-144   64     
208    48     
48     0      
-144   0      
272    272    
-208   80     
112    48     
-80    0      
-48    -176   
-112   -16    
112    160    
-400   64     
-16    -48    
320    -320   
-448   -128   
80     128    
-80    -416   
624    48     
272    -128   
80     128    
-800   592    
64     32     
96     -240   
128    -112   
-144   -96    
-400   -128   
368    -64    
0      -48    
-96    304    
-304   112    
128    80     
16     -192   
-320   240    
80     -880   
-384   -80    
176    272    
-16    0      
208    -192   
-144   -176   
-96    240    
-208   -160   
48     -224   
160    352    
-160   352    
-208   -176   
-64    192    
704    2224   
336    224    
-1200  560    
-16    -320   
160    96     
448    304    
-304   528    
224    -480   
-368   -288   
432    240    
48     304    
-80    -240   
-96    192    
-48    -544   
320    -144   
-192   288    
32     208    
-160   384    
48     -144   
128    -16    
496    288    
-1104  704    
976    144    
-496   -32    
160    704    
352    560    
-544   -256   
-64    288    
48     16     
224    -112   
-320   -192   
352    -336   
-160   224    
304    160    
-176   16     
-384   336    
160    80     
224    -96    
-16    -144   
-144   -144   
-256   96     
-32    -80    
256    176    
-128   -144   
-48    -16    
-16    -48    
160    16     
-128   112    
-304   -208   
-64    -800   
144    656    
816    -672   
-528   -240   
400    384    
-224   48     
-256   144    
48     16     
352    -80    
-144   -272   
-208   -272   
32     -208   
80     -32    
-240   0      
304    80     
336    -96    
-304   32     
112    32     
192    -112   
-32    16     
64     16     
-336   -448   
1248   816    
-1104  -176   
-288   -176   
1472   400    
-864   400    
-528   -592   
128    -928   
496    -832   
-688   -240   
-48    -64    
144    112    
80     64     
112    -256   
-128   -464   
96     -64    
-96    -112   
624    -16    
160    80     
-448   -1168  
288    -176   
-16    -144   
400    -80    
-224   384    
576    0      
-624   -1184  
-384   -752   
320    -48    
32     384    
-48    320    
320    208    
-320   -240   
288    -384   
-576   -1008  
-432   -1216  
384    400    
80     -384   
432    -416   
144    -112   
-544   112    
224    352    
16     176    
-128   -96    
96     16     
208    144    
-304   624    
-448   352    
-16    64     
-32    80     
160    -992   
1360   2400   
-1840  800    
-240   560    
2272   -256   
-1248  -832   
-608   -320   
368    96     
432    1264   
352    -80    
-544   256    
112    -64    
208    336    
80     -80    
-16    -16    
-16    -128   
-448   -144   
352    416    
112    144    
-80    48     
96     -32    
-208   80     
-16    -80    
400    -48    
80     -256   
-464   -496   
-128   -400   
176    -640   
160    -176   
208    32     
-176   272    
0      -96    
176    -192   
0      -64    
-160   -128   
192    368    
-64    400    
-208   -272   
240    -272   
-288   -208   
80     -864   
352    -160   
-320   -32    
-112   -736   
32     304    
368    32     
-96    304    
-160   -448   
160    -1200  
304    -32    
-272   432    
-304   -176   
208    736    
1184   144    
-752   800    
-48    912    
320    464    
-48    -32    
208    608    
-48    272    
48     -768   
-128   752    
288    672    
192    64     
-144   -512   
112    96     
64     320    
-112   96     
-96    -320   
240    -320   
-16    -176   
-64    304    
288    48     
-192   32     
64     192    
64     -800   
-208   -720   
192    -656   
64     128    
-368   -112   
-96    240    
32     48     
480    -1120  
-224   720    
256    -480   
-288   -656   
-80    -1040  
352    -288   
256    592    
-304   -80    
-176   -432   
224    144    
176    -144   
96     448    
16     16     
-160   624    
288    224    
-256   352    
-112   48     
48     64     
160    256    
-16    -256   
-432   -1008  
560    -528   
0      592    
-112   -288   
416    480    
-512   704    
160    560    
-128   64     
-16    384    
-160   -224   
160    0      
176    -128   
-80    -2224  
112    -144   
112    96     
-112   32     
-32    -128   
-32    32     
256    -112   
-192   128    
-48    32     
304    160    
-224   -80    
592    -352   
-496   32     
-128   0      
144    64     
208    112    
224    -368   
912    192    
-2512  128    
1024   224    
928    -1472  
-592   16     
-736   -160   
208    -32    
256    400    
-592   -160   
336    -208   
304    16     
-464   -224   
256    -16    
-368   64     
416    16     
-624   48     
-128   -352   
368    128    
128    -96    
-64    112    
80     -448   
368    896    
-1280  -464   
240    208    
128    -64    
-416   32     
224    224    
304    64     
32     208    
-208   -112   
-48    -160   
400    -272   
112    96     
-112   -16    
-64    160    
64     -176   
48     -16    
-32    -1168  
-192   0      
16     -432   
32     -64    
336    -96    
448    320    
-736   -288   
-832   -464   
1456   -528   
480    -592   
-64    -432   
656    -368   
-512   -432   
-80    -1120  
464    -128   
-96    -1072  
-128   112    
-192   240    
-256   -112   
560    -176   
640    -96    
-192   496    
-416   432    
-336   288    
656    16     
-1488  80     
-192   -144   
224    -32    
304    -304   
-640   -80    
128    -352   
368    32     
-48    -912   
1680   -3520  
-3168  -1408  
1664   944    
832    288    
-784   16     
-640   -144   
336    304    
352    0      
-320   32     
-704   0      
480    -96    
320    128    
-512   -416   
64     96     
128    -2448  
224    80     
48     16     
16     -64    
-464   -544   
624    -896   
-368   -384   
80     -112   
-240   208    
-560   -128   
32     -16    
-48    -112   
-80    64     
16     -160   
336    -80    
-16    -752   
-320   -16    
208    144    
48     48     
208    224    
-336   304    
208    176    
128    16     
208    -352   
-144   -240   
-272   0      
352    -256   
-80    176    
-80    48     
288    48     
-240   -176   
192    0      
112    64     
96     -128   
-624   -336   
448    -320   
16     -96    
-48    -720   
-752   208    
576    -208   
-992   208    
688    -32    
112    304    
-416   192    
48     128    
0      -112   
-1296  -160   
-112   -16    
-32    -80    
32     -128   
16     -352   
-160   64     
-32    240    
144    128    
128    448    
80     656    
-96    576    
-48    192    
-400   -304   
288    208    
-160   208    
-176   256    
-336   0      
288    32     
48     48     
144    32     
-592   -656   
1136   -336   
-336   704    
-96    192    
-144   256    
-176   -112   
-16    480    
112    -128   
-16    720    
-48    144    
-240   0      
272    -48    
-192   -128   
-112   256    
-96    240    
64     128    
-352   96     
16     -208   
0      -208   
112    -112   
-192   32     
96     1568   
96     64     
-208   -160   
160    -688   
-144   688    
160    144    
0      -32    
-176   -48    
-224   160    
160    -256   
112    512    
-160   400    
-48    272    
80     -192   
320    -336   
-144   112    
-80    656    
-32    -480   
-80    -16    
144    272    
144    -16    
-32    192    
-112   48     
-192   432    
80     -288   
-112   -112   
48     48     
-320   64     
-304   848    
736    1184   
240    -176   
-2256  -288   
2288   896    
-256   1392   
-848   416    
528    912    
128    -144   
48     -96    
-320   -144   
128    -64    
-80    32     
48     48     
-160   208    
-160   448    
64     -160   
112    64     
-192   320    
240    352    
-48    -112   
16     -48    
-656   -192   
864    -48    
800    -160   
-1504  -688   
192    -48    
128    -128   
-432   -1600  
-992   -1216  
880    1552   
-336   880    
192    -336   
64     -528   
-256   -16    
160    848    
448    368    
-96    272    
-112   784    
-176   192    
-64    -96    
416    176    
-320   160    
-112   -128   
-176   16     
128    -288   
-880   -16    
112    64     
384    -1072  
-320   -672   
736    -112   
-544   -192   
64     160    
-384   -720   
-128   -80    
400    320    
-320   288    
240    -64    
-432   -192   
96     848    
-64    432    
-304   16     
320    -144   
48     -144   
240    176    
-32    -624   
560    -160   
-144   592    
-96    288    
240    448    
-64    112    
-624   -560   
736    256    
2544   1360   
-1488  464    
-752   -48    
512    -1408  
128    -544   
240    -80    
-16    464    
-176   -64    
-176   432    
208    -176   
64     112    
-32    272    
-128   -192   
-112   176    
-208   -112   
-16    144    
-128   144    
32     544    
208    656    
16     272    
-400   -384   
-32    384    
560    -1040  
-624   -16    
192    160    
-160   592    
112    1040   
160    768    
48     208    
-96    -320   
288    -624   
-48    272    
-64    112    
-336   192    
496    272    
-32    416    
-32    192    
48     336    
-96    -272   
0      240    
-144   -144   
-16    -192   
128    -672   
-752   -464   
16     -384   
48     -224   
272    544    
144    720    
-208   496    
16     -720   
-672   -192   
672    1120   
496    816    
-96    1056   
-64    848    
400    1040   
64     816    
16     1248   
-448   816    
288    544    
416    -688   
-464   80     
96     32     
-16    0      
448    416    
-368   336    
288    784    
-288   560    
192    256    
240    -32    
-128   -208   
-112   -112   
-48    -160   
144    -144   
-32    -16    
-176   -1360  
0      -1200  
-32    -368   
-464   -1088  
944    -1920  
-496   896    
560    -480   
-272   224    
-256   -48    
496    -48    
-48    256    
224    -208   
-432   256    
144    144    
208    112    
192    -1072  
-80    400    
-160   -112   
208    192    
-16    -48    
96     -112   
48     208    
-128   144    
144    -64    
688    96     
-1712  448    
752    160    
160    -208   
-2192  -160   
880    -256   
-352   -256   
48     -176   
-272   -368   
528    304    
-16    32     
-208   80     
-48    -32    
112    128    
-176   16     
96     -16    
144    32     
-80    96     
-128   16     
96     -160   
336    112    
-288   -64    
112    112    
-96    -784   
176    272    
96     80     
-224   128    
208    -240   
-48    128    
1248   32     
-1712  -112   
400    -416   
240    -224   
-272   48     
576    -304   
-544   304    
576    -240   
-416   320    
400    -704   
160    96     
-304   -2448  
-32    96     
80     -96    
736    144    
-544   -176   
32     240    
96     -16    
-64    192    
208    80     
-208   48     
128    -448   
1024   48     
-1328  -416   
736    -144   
768    -80    
-1296  -640   
864    112    
128    336    
-80    368    
128    0      
-304   80     
64     64     
240    208    
-64    112    
32     -240   
-128   160    
176    -752   
256    -80    
-128   224    
-528   144    
288    -96    
176    288    
416    128    
32     16     
-416   -320   
304    -208   
240    -176   
-432   -192   
-256   32     
272    -672   
48     192    
-208   272    
-192   256    
-32    -48    
-160   112    
816    288    
-160   -48    
240    32     
192    112    
80     64     
-256   176    
-208   128    
-48    -240   
384    96     
-80    -304   
-416   64     
-16    -16    
64     48     
592    -32    
496    3824   
144    800    
-416   -176   
1600   -320   
-544   -432   
-1008  160    
656    -1360  
320    -592   
224    -272   
-1184  -800   
512    16     
112    -1760  
192    -176   
80     80     
-208   -192   
-16    208    
416    -32    
-32    -544   
-336   -16    
512    -80    
176    -16    
-816   -304   
240    0      
-416   -16    
-256   -48    
704    -144   
-304   -336   
48     -96    
416    -16    
-144   -144   
224    96     
-48    -96    
-32    -240   
-112   -48    
368    -576   
-480   -544   
384    -224   
-48    -208   
-288   -288   
160    -384   
-112   -96    
336    -608   
-240   -224   
0      0      
256    640    
160    288    
-752   -1248  
176    -928   
-112   -320   
-48    -272   
256    240    
-272   736    
-320   128    
-272   -560   
16     -640   
-80    -624   
-64    -688   
-224   -528   
320    -656   
0      -560   
-80    -1024  
32     -64    
-128   -48    
-176   -208   
448    -688   
144    -128   
-320   -240   
-368   -416   
-160   240    
464    640    
-1024  32     
-64    -160   
-32    -64    
-16    -96    
176    -32    
-32    -304   
-48    416    
-32    -352   
304    256    
-64    -304   
-64    -80    
-192   -1632  
-240   -448   
-48    320    
112    -736   
32     -384   
64     -80    
320    -560   
144    256    
192    -464   
160    16     
-192   16     
-64    -64    
240    288    
0      -224   
-144   -80    
-16    -32    
208    144    
192    -176   
32     -224   
-336   -176   
288    -496   
-1248  160    
736    16     
224    320    
-48    -592   
-272   304    
-96    -928   
112    -208   
96     -240   
-32    64     
-32    16     
-208   -80    
-16    -80    
112    16     
-304   352    
416    224    
-480   -160   
-128   288    
464    32     
-288   -432   
-112   0      
-16    -144   
320    -32    
112    48     
208    -80    
-896   -16    
320    -80    
224    16     
-160   128    
-192   160    
-1264  -1184  
768    -16    
-304   -144   
-288   -160   
304    16     
416    -288   
80     -80    
-496   -784   
-416   32     
224    320    
80     688    
-256   64     
-16    -496   
112    160    
-256   -16    
-80    -64    
96     -128   
192    -752   
-448   -256   
-208   784    
-304   -816   
1536   736    
-1456  160    
256    -48    
-224   -128   
-640   -32    
320    -720   
704    -1152  
-432   -2304  
-768   -944   
-832   416    
32     1008   
-192   368    
480    96     
-272   -352   
-144   -80    
-240   -240   
432    -448   
-16    -176   
-256   80     
48     416    
-32    -96    
0      -240   
240    -96    
-288   816    
-224   1424   
-352   1248   
320    1296   
-48    1488   
-560   112    
176    -16    
-16    -256   
-304   -48    
448    688    
-176   96     
-512   80     
256    -512   
1056   16     
480    576    
-272   192    
16     272    
-64    -112   
368    560    
-384   656    
-64    448    
-160   -16    
208    -160   
16     272    
-576   608    
-48    128    
0      -2912  
-1648  -880   
304    128    
448    -208   
560    -672   
-960   96     
0      544    
96     912    
528    352    
32     -32    
-544   80     
-192   0      
400    176    
288    80     
-656   -96    
-320   352    
368    160    
368    -256   
-80    -1008  
-736   -208   
64     384    
208    272    
-48    272    
608    0      
-912   -304   
112    160    
80     -96    
-144   192    
48     112    
-208   176    
-176   736    
64     336    
-96    -224   
320    16     
128    16     
-672   -96    
320    -64    
-64    -112   
-240   -48    
96     96     
16     -80    
-144   -112   
-128   -128   
80     -16    
112    32     
-192   944    
-48    944    
176    -64    
-768   -576   
224    -176   
-80    -80    
-224   960    
1040   176    
-304   -112   
-80    144    
160    80     
-144   96     
432    96     
-80    96     
-176   80     
16     192    
48     384    
-32    336    
-224   160    
272    128    
-64    -16    
-176   192    
144    0      
112    -384   
-544   352    
336    -48    
-48    128    
-80    32     
-16    0      
-208   -288   
592    368    
16     320    
-192   -176   
-176   112    
-48    -48    
1104   2624   
-2576  -160   
16     16     
1216   32     
-640   -208   
32     -64    
112    16     
144    336    
-128   112    
176    64     
-80    224    
-352   48     
320    -128   
-64    -160   
-208   272    
224    416    
-352   48     
160    -64    
176    -16    
-112   208    
-224   64     
624    1120   
432    -80    
-704   128    
-368   176    
32     -32    
256    48     
-80    0      
-48    -16    
-288   176    
112    48     
48     112    
176    -16    
-176   144    
160    -64    
-176   304    
128    192    
-304   16     
112    32     
-272   -128   
192    144    
64     80     
112    192    
-80    64     
-256   128    
688    112    
-464   -16    
288    176    
96     208    
-272   48     
-64    2112   
272    976    
-912   400    
192    -288   
-304   64     
624    240    
-48    80     
176    336    
-208   -80    
-288   96     
224    48     
64     48     
0      128    
-96    -96    
0      96     
384    80     
-528   96     
160    96     
320    160    
-272   16     
96     176    
-320   -528   
-816   704    
1568   -176   
-1040  -1072  
-448   144    
992    112    
-288   96     
-688   112    
400    -112   
192    128    
0      64     
-16    32     
208    144    
-416   -32    
432    80     
-48    48     
-32    240    
-80    208    
176    -560   
384    48     
-192   -208   
560    272    
544    -16    
-368   80     
96     208    
16     32     
384    272    
1152   -496   
-880   368    
352    256    
32     32     
352    160    
144    64     
32     -336   
16     -128   
368    -112   
0      176    
-320   592    
-272   208    
16     48     
304    48     
-112   16     
32     64     
-96    32     
-80    -48    
288    -64    
-80    -96    
-416   32     
288    -672   
-832   -1296  
-1056  -1808  
-528   192    
320    192    
1280   -16    
-880   -80    
-496   128    
224    -288   
16     48     
592    -176   
-304   192    
-160   -208   
-80    -32    
304    32     
64     -224   
256    160    
-224   -512   
224    80     
16     0      
-304   256    
256    256    
160    224    
-112   -48    
-224   96     
400    -96    
-368   -288   
-240   112    
80     -16    
48     -304   
464    -912   
-608   -544   
80     -272   
320    -32    
-16    -3200  
-256   -352   
192    -16    
0      656    
-544   0      
432    -192   
128    -144   
-160   -160   
96     -48    
208    -128   
16     16     
176    -64    
80     -144   
112    -80    
-128   608    
160    -224   
96     -496   
-16    -640   
-80    912    
928    -64    
-448   832    
576    640    
-384   336    
112    320    
608    1328   
-96    384    
16     -784   
80     96     
32     -224   
0      128    
176    -96    
32     704    
0      208    
272    -160   
-416   -96    
144    224    
160    -160   
192    -48    
128    64     
-112   -304   
160    400    
-48    192    
-96    96     
160    -160   
224    -32    
-288   -80    
32     240    
272    -48    
-432   32     
496    -224   
-560   -32    
400    -1680  
80     -192   
80     -304   
16     -176   
-336   256    
32     16     
336    16     
112    -240   
-48    96     
-160   -272   
192    192    
176    112    
0      -416   
-80    128    
-48    -432   
160    -272   
-256   -224   
720    -928   
-192   368    
544    -992   
-384   16     
-80    288    
48     -320   
208    224    
208    -256   
-16    -160   
-80    256    
272    -208   
-96    32     
-112   -64    
32     176    
16     0      
-336   -272   
112    -112   
32     -640   
-48    -144   
96     -704   
304    -336   
-48    0      
-80    -144   
224    -624   
32     -64    
32     64     
80     -80    
368    0      
-480   304    
1344   592    
-2320  -80    
-976   -848   
1872   -736   
-640   -640   
-464   96     
384    496    
688    -1584  
-272   608    
128    -256   
-48    -128   
-192   -64    
336    272    
-112   208    
-336   -192   
-144   -80    
256    80     
32     -368   
-368   -512   
-32    48     
16     -240   
1088   544    
-352   -880   
-480   -272   
960    -192   
-496   528    
336    480    
288    1968   
1152   1424   
-368   1520   
-144   1168   
112    16     
80     -240   
352    -288   
64     208    
-16    -496   
-128   112    
48     736    
688    144    
192    336    
-560   688    
-112   64     
592    -32    
-64    -528   
-368   368    
144    -240   
896    -512   
-896   -368   
224    -224   
-336   128    
128    -80    
384    272    
-192   -496   
-480   -48    
288    -2384  
-480   320    
288    -112   
-624   -320   
64     224    
336    -48    
-624   -16    
416    0      
-64    -272   
256    176    
-288   64     
288    -128   
464    144    
0      -176   
128    784    
-656   496    
-160   -1824  
-1232  -480   
0      16     
176    192    
800    -96    
-528   368    
-128   -96    
-704   336    
720    -224   
-384   96     
224    -272   
-464   80     
192    -336   
384    -128   
-352   -848   
352    -112   
-384   64     
240    -112   
192    -976   
-1008  -1520  
208    16     
80     16     
32     160    
784    0      
-1808  -96    
224    -288   
-64    0      
208    -352   
-368   -16    
48     -48    
-592   32     
32     64     
32     320    
192    560    
176    160    
-160   320    
-256   64     
-48    224    
608    -80    
-192   112    
-288   -144   
112    208    
-144   -208   
400    16     
-240   -288   
-112   80     
160    -80    
-784   -32    
80     -112   
-256   32     
-64    64     
-48    -816   
-720   144    
192    -208   
288    16     
-32    -256   
144    -80    
16     -160   
-96    48     
-304   80     
32     80     
-32    -48    
-64    -112   
0      -32    
-256   -32    
-208   96     
-80    384    
352    448    
-32    -144   
-560   416    
432    -96    
-144   128    
-176   -160   
96     -48    
-160   -16    
64     -240   
64     528    
-240   176    
48     -272   
112    96     
1056   2512   
-3376  112    
304    80     
1216   -96    
-656   -368   
-256   -160   
208    -160   
80     224    
-112   192    
208    -32    
-336   208    
-96    160    
256    -16    
16     112    
-432   -240   
128    96     
16     240    
-128   -32    
-32    -256   
48     400    
-336   -720   
608    -480   
-448   352    
-48    -80    
336    80     
-288   -64    
-192   128    
304    320    
224    -176   
-480   256    
256    -32    
-224   -48    
304    144    
-864   -64    
128    96     
-16    -64    
224    272    
-176   0      
80     192    
144    -16    
-48    32     
-80    80     
144    128    
96     -16    
128    48     
-112   32     
-400   112    
112    80     
-304   32     
-48    384    
-1472  -576   
2688   464    
-784   -128   
-1200  96     
432    -64    
464    288    
-80    -416   
-368   -688   
48     -272   
-448   -16    
288    192    
-112   -16    
-128   112    
-144   192    
192    160    
-496   160    
192    0      
-336   16     
96     -144   
176    32     
-144   32     
368    384    
-1584  -32    
336    336    
288    128    
-736   -96    
320    128    
-48    224    
-384   -16    
-400   160    
448    -48    
-16    80     
-144   128    
48     128    
112    160    
-448   48     
224    48     
-16    160    
-128   80     
256    -48    
32     144    
-144   0      
-256   -80    
1024   400    
-560   -48    
-656   272    
848    144    
-208   -112   
-336   208    
128    -128   
-384   112    
384    96     
144    -48    
-80    256    
-400   192    
224    272    
32     464    
-272   -64    
-224   32     
80     96     
208    160    
208    -176   
400    -32    
-496   240    
176    80     
128    96     
32     -192   
-400   240    
208    80     
-624   -272   
1984   2144   
-1616  2000   
80     304    
2000   -96    
-752   -48    
-944   32     
704    416    
336    -352   
-32    -64    
144    80     
-96    112    
-96    176    
128    64     
160    64     
-192   -112   
160    144    
80     -16    
-64    0      
-64    -64    
336    -384   
-192   -720   
-128   -320   
-144   -144   
256    -256   
-368   -208   
-448   -144   
544    -368   
-528   -1248  
272    -592   
-176   720    
48     -64    
-64    -192   
304    64     
-16    416    
-176   464    
80     272    
96     192    
32     48     
16     -704   
-176   208    
96     400    
160    112    
144    272    
192    80     
-848   -1072  
208    -112   
-48    -48    
224    -32    
80     576    
-256   -160   
208    256    
384    304    
-1344  368    
800    16     
176    960    
-368   304    
80     256    
-464   880    
144    -304   
96     144    
16     -48    
112    144    
-32    -48    
112    144    
-384   304    
-80    80     
352    -64    
-64    256    
-160   80     
368    -128   
16     128    
-32    32     
-144   16     
160    112    
-192   48     
-64    144    
208    -32    
272    -1488  
-64    -16    
48     128    
64     32     
-112   -576   
-224   -96    
-288   384    
336    128    
32     48     
48     -112   
288    -304   
144    672    
-112   144    
-96    -368   
96     144    
-48    -240   
-80    400    
-64    -2176  
144    32     
0      48     
-224   176    
160    368    
208    16     
32     -208   
-224   -304   
96     112    
-224   272    
256    80     
80     32     
-64    160    
-288   32     
208    48     
224    -368   
-80    -112   
16     224    
-208   208    
128    0      
48     -80    
-96    -32    
96     32     
-176   80     
-32    -208   
64     800    
-16    256    
-64    48     
208    -80    
-48    16     
-64    -768   
-16    112    
-144   -496   
336    112    
-160   -80    
-48    224    
-128   400    
576    608    
1552   32     
-1184  -400   
128    -496   
928    -688   
208    240    
-32    -752   
-128   464    
80     96     
-128   1088   
512    16     
64     96     
-192   0      
-144   368    
464    64     
-48    336    
-176   176    
80     -16    
432    224    
-192   -656   
640    864    
-1744  -576   
-192   624    
1056   -1088  
-1488  -416   
1376   -880   
-1248  -880   
832    672    
432    688    
-368   224    
48     32     
-64    128    
224    272    
32     160    
-544   -448   
208    288    
272    64     
-192   32     
0      -80    
-144   176    
256    -288   
192    480    
-832   -256   
224    64     
544    208    
-512   -2064  
720    512    
80     16     
192    -96    
-128   -224   
16     400    
576    -192   
96     304    
-96    -144   
-240   -96    
-384   -96    
496    -624   
-208   944    
432    -112   
240    128    
-192   -48    
-128   -672   
-32    -32    
-224   -336   
352    0      
-352   -240   
-240   0      
176    96     
48     -352   
-672   -3120  
1248   -2592  
1248   -208   
-32    320    
-512   -16    
-528   256    
192    -336   
384    304    
-128   -304   
-608   64     
304    -240   
80     -96    
128    -288   
272    -1040  
-320   -272   
176    48     
-48    -48    
-144   -80    
144    -160   
304    704    
176    -192   
-688   272    
352    80     
288    -112   
-192   -96    
-368   -16    
672    -400   
-864   -224   
464    -256   
128    32     
-32    48     
-80    16     
-32    -48    
336    208    
-352   -272   
-256   -112   
256    -80    
-16    0      
-64    -128   
-1008  -128   
400    0      
176    -176   
-208   64     
96     -96    
-816   -240   
656    -1936  
-608   128    
304    144    
-368   64     
-16    -32    
256    -160   
-352   -176   
464    -336   
16     -416   
-336   -144   
-16    256    
-112   256    
-288   144    
160    -304   
-16    -288   
-240   -672   
-96    144    
160    -64    
208    64     
-272   192    
96     80     
304    -320   
-320   -272   
416    608    
-608   448    
32     -48    
96     -240   
-528   0      
-144   -192   
160    160    
160    -224   
-128   256    
32     -912   
16     -752   
-16    0      
128    192    
-1008  -1568  
864    -608   
128    -208   
-832   -112   
976    128    
176    144    
-1104  928    
80     -352   
224    -608   
160    128    
-48    224    
-208   -1136  
-48    80     
48     -368   
192    -96    
-256   64     
-416   144    
160    -160   
336    -112   
-160   -16    
496    976    
-1216  400    
432    -288   
688    32     
-224   -288   
-16    -16    
-64    160    
-256   384    
160    -128   
128    -48    
-240   48     
-96    112    
224    -144   
-272   64     
208    64     
0      208    
-32    112    
368    16     
-560   368    
-640   -32    
16     176    
112    -64    
-560   128    
0      -80    
-272   256    
-16    -80    
-144   256    
96     -64    
-16    48     
240    880    
-1392  208    
4112   1200   
-1200  704    
-1200  16     
1856   96     
-944   -16    
-544   528    
384    336    
-80    224    
-1120  -192   
-144   0      
-560   -48    
32     208    
48     -448   
-496   64     
624    -304   
-288   224    
32     -240   
-240   -128   
-48    -544   
-96    208    
96     656    
1504   112    
-1120  112    
-48    -480   
272    -784   
144    256    
-288   48     
-496   -128   
-80    160    
-144   48     
160    48     
-528   224    
352    -16    
-304   160    
544    -96    
-256   128    
48     448    
176    -32    
-256   -48    
16     -112   
-112   -128   
512    448    
-912   432    
368    -544   
-384   224    
-240   -400   
896    -592   
-368   160    
544    176    
240    208    
-112   -48    
-208   -128   
-32    64     
288    80     
976    -48    
-288   336    
-784   144    
0      -288   
448    560    
-1024  208    
288    -16    
80     0      
-48    224    
48     -160   
-320   320    
464    -224   
0      208    
16     80     
-160   192    
1120   -400   
-2448  -256   
-272   688    
1152   -176   
-544   -176   
-976   -576   
192    304    
-400   -128   
432    -1200  
-48    32     
-352   -48    
48     -48    
144    0      
256    0      
-256   384    
-128   800    
128    -192   
-160   160    
112    -112   
16     704    
-464   64     
-32    -64    
496    224    
-208   48     
-32    208    
-48    -320   
-320   144    
96     512    
32     496    
240    448    
-368   96     
-320   -288   
-272   -656   
-64    -512   
224    560    
-192   880    
-272   512    
368    80     
-48    -688   
-224   560    
-128   32     
-192   192    
112    -256   
0      288    
-128   560    
-128   -304   
-48    -384   
-400   -624   
272    576    
0      160    
-528   -688   
944    -336   
-608   832    
-16    16     
-224   272    
-208   -384   
-48    192    
-144   1424   
256    480    
32     -288   
64     -128   
-80    320    
176    -352   
48     -416   
160    -48    
-352   0      
-48    240    
-32    224    
-80    64     
96     64     
64     48     
-32    0      
-176   64     
176    -80    
144    -176   
-208   128    
208    -128   
-208   80     
-272   112    
160    192    
-128   80     
208    352    
32     368    
-48    16     
-48    336    
48     112    
-96    128    
432    448    
-64    1008   
-192   320    
208    64     
48     0      
-32    -48    
-64    224    
224    304    
-48    272    
-112   -112   
208    -256   
64     -224   
80     -96    
480    208    
-1088  832    
704    -336   
176    256    
-400   688    
112    128    
-176   64     
-96    832    
304    224    
160    -256   
-432   240    
-96    144    
128    128    
384    176    
32     -256   
-384   -128   
-192   512    
160    -272   
288    480    
-240   -224   
-128   432    
-128   -224   
320    96     
64     -496   
-192   32     
-48    0      
160    112    
336    64     
-256   -96    
464    -464   
-1312  -848   
576    192    
384    -16    
-752   272    
960    192    
-672   336    
368    224    
-128   512    
48     336    
-112   112    
384    336    
-112   112    
-128   16     
176    304    
464    176    
-96    144    
-160   288    
144    384    
-32    192    
-48    -32    
48     160    
-416   -928   
-320   208    
752    -272   
112    -624   
-256   176    
320    -144   
32     -368   
-864   352    
736    80     
-96    -48    
0      240    
96     64     
-288   0      
352    128    
16     96     
-112   32     
96     80     
-112   -64    
496    -112   
336    128    
-144   576    
-800   384    
352    -80    
32     656    
80     480    
80     1120   
-1056  656    
-736   -480   
864    -624   
448    192    
-640   272    
48     160    
432    112    
208    656    
-80    16     
-832   -400   
288    -192   
368    -416   
272    16     
-528   -272   
-320   240    
400    -208   
144    -48    
-352   0      
240    144    
-368   256    
224    -416   
80     112    
-768   624    
64     3664   
1248   -192   
-1824  -256   
384    -672   
1088   48     
-80    112    
-752   256    
224    112    
240    -288   
-192   48     
96     -352   
-96    -80    
320    -64    
208    16     
16     0      
-320   96     
192    -896   
512    48     
-656   -2160  
-352   32     
336    -80    
-144   16     
352    0      
576    -96    
128    -288   
-256   176    
400    320    
-64    128    
144    64     
-224   -352   
-384   0      
240    -384   
-80    256    
80     -128   
368    112    
-272   -192   
-80    80     
176    -304   
-880   48     
496    -16    
-144   -304   
352    176    
-256   -192   
-208   128    
336    -512   
112    -192   
-144   -560   
-144   224    
48     48     
48     432    
336    288    
64     1056   
736    32     
-464   -80    
368    64     
432    512    
-256   304    
-48    192    
-48    240    
288    32     
-16    48     
-48    -64    
112    96     
16     -256   
80     448    
-16    192    
80     -2528  
32     -176   
32     -400   
240    -352   
-496   96     
208    -256   
240    -368   
96     224    
-112   80     
-272   288    
288    -416   
112    -224   
0      -64    
48     -512   
480    -512   
-2240  1232   
1680   48     
-320   -208   
-272   -208   
160    -192   
-48    -80    
352    592    
-720   -400   
576    -240   
-80    32     
-240   -176   
224    -640   
-160   96     
32     -1040  
400    672    
-144   -96    
-192   -128   
64     -16    
-160   176    
-96    -592   
240    -896   
-368   400    
672    -64    
32     -288   
-304   -1584  
96     -256   
240    272    
32     176    
-208   -208   
-16    192    
208    -272   
192    -32    
-416   144    
144    176    
-16    -48    
208    -176   
-144   112    
128    -288   
-160   96     
112    -576   
64     80     
64     -368   
-272   0      
-176   -128   
480    -16    
-448   -16    
224    32     
-128   160    
320    144    
-1376  -1104  
-192   -416   
1200   -736   
-1424  -144   
800    464    
48     208    
-128   224    
144    -1984  
-448   192    
352    -96    
16     80     
-64    0      
192    48     
-96    176    
-240   112    
-48    288    
304    -128   
-96    64     
-80    -96    
-96    144    
-32    -576   
928    1104   
112    -288   
-320   336    
96     448    
-272   448    
-48    -160   
-64    -672   
-96    -96    
16     224    
80     -160   
32     16     
-96    96     
0      112    
-384   144    
-80    -208   
528    112    
-48    160    
160    80     
-64    -992   
48     80     
96     64     
112    -48    
272    160    
0      -64    
128    592    
400    144    
-80    -1440  
-656   -1056  
672    -496   
48     -160   
128    288    
-144   368    
-48    -464   
-368   -1024  
544    816    
-960   352    
288    64     
-480   352    
-176   -272   
16     -304   
192    320    
-144   320    
-176   416    
48     48     
-432   -144   
144    -448   
-48    96     
-128   336    
-128   272    
-496   -1312  
1904   -992   
1072   32     
-1312  1584   
528    768    
-400   432    
128    -416   
192    -272   
-160   176    
-416   -192   
-528   240    
352    -272   
-656   -160   
-16    128    
-176   -192   
272    560    
-320   80     
-448   -288   
16     -384   
-80    -544   
-288   -512   
0      352    
352    416    
-320   -16    
-608   -512   
-624   -736   
320    1152   
-656   -1168  
640    -336   
-16    416    
-272   -176   
-64    592    
208    -288   
112    -128   
-480   -256   
48     -576   
-128   0      
48     624    
-320   -464   
-48    96     
-320   0      
400    384    
-224   -464   
-16    64     
16     -432   
-384   -592   
176    368    
224    -656   
-48    -304   
-496   176    
-160   176    
-1536  -592   
576    -704   
-192   -160   
-160   336    
304    192    
416    0      
-304   -192   
-272   -240   
-80    352    
32     96     
144    80     
-112   176    
-352   80     
-400   160    
128    48     
-288   -448   
192    432    
64     -96    
-240   32     
336    -192   
-112   0      
32     -144   
-64    -160   
304    176    
16     784    
32     304    
0      208    
80     448    
-160   160    
16     96     
-112   1520   
752    -48    
-1344  -736   
64     -64    
-160   -128   
176    -192   
272    -320   
-400   288    
-128   544    
0      48     
272    0      
-112   -80    
-80    224    
-192   256    
176    64     
-128   -16    
-48    240    
-1232  -96    
80     0      
144    240    
-96    1248   
368    192    
-352   848    
16     752    
0      384    
-16    -672   
-304   416    
64     112    
96     384    
-80    688    
-192   -32    
144    176    
-448   432    
-128   -32    
48     208    
16     -256   
240    -400   
-192   -96    
48     -96    
-16    48     
-32    128    
48     -32    
144    -64    
-208   -112   
384    -16    
-176   48     
-160   144    
-80    0      
112    240    
208    2288   
656    -832   
-1936  32     
1664   -176   
224    176    
-1488  16     
720    -32    
352    -512   
-464   -128   
-32    -32    
80     96     
-48    64     
-16    112    
224    32     
-688   32     
288    160    
16     -16    
-112   -128   
-32    0      
208    32     
-32    96     
-80    128    
240    320    
1840   -32    
-1520  160    
672    144    
-224   0      
-144   32     
416    240    
-960   272    
288    -48    
-128   208    
-32    112    
96     -48    
80     96     
144    96     
-304   96     
112    -160   
32     -64    
112    128    
96     80     
-144   48     
-384   -96    
896    -384   
-96    224    
-176   -64    
176    -160   
-416   208    
-48    -240   
608    400    
-64    400    
-640   336    
16     272    
96     112    
-336   -464   
240    -560   
-160   -560   
256    -288   
-320   -416   
-208   -448   
400    80     
112    144    
-448   48     
16     128    
240    80     
736    336    
-864   -96    
-464   -48    
1296   224    
-176   -368   
-912   -224   
2512   -2016  
832    96     
-1328  384    
-496   208    
784    -96    
608    -80    
-160   496    
-80    336    
-720   16     
288    96     
96     16     
-160   48     
-192   96     
-288   48     
336    128    
160    160    
-112   48     
-48    96     
16     -592   
-896   -256   
656    -208   
-256   416    
496    -80    
-512   32     
352    96     
224    -288   
-768   -80    
368    -48    
-16    -16    
-32    32     
16     144    
-112   64     
0      288    
304    -16    
-608   -32    
640    32     
-720   -48    
-48    112    
80     256    
-32    208    
-48    240    
-48    128    
-240   -112   
240    144    
-128   0      
448    240    
-352   -48    
240    112    
144    0      
-128   -112   
144    48     
176    672    
592    -144   
-416   -704   
96     -144   
80     112    
16     -80    
240    -80    
-672   192    
112    0      
272    0      
32     -464   
-96    0      
48     -464   
96     48     
-80    -48    
0      80     
80     208    
48     128    
224    -288   
-272   96     
160    192    
-272   416    
176    96     
176    0      
112    224    
-32    -160   
0      256    
-112   -1136  
160    -96    
224    -1728  
-1712  1856   
1792   -208   
-784   -112   
832    -640   
-368   544    
-208   64     
-32    208    
384    144    
160    -48    
-336   -48    
-112   -256   
352    32     
-16    -608   
-176   -96    
176    -1936  
176    384    
112    256    
144    176    
-160   48     
32     240    
-320   -176   
336    -256   
144    304    
112    -352   
-176   -304   
32     -256   
224    -64    
-64    -448   
80     -16    
-48    -304   
48     208    
-32    160    
96     -16    
-240   -96    
48     272    
288    464    
-112   -368   
-112   16     
224    -160   
80     32     
-64    -32    
64     160    
48     -400   
64     0      
80     96     
-16    16     
240    192    
-80    224    
-112   64     
-720   -496   
-64    288    
1264   -432   
-1168  -208   
240    464    
256    48     
-576   656    
208    -976   
-112   -1216  
80     -112   
-16    -64    
96     144    
16     96     
-112   224    
384    496    
48     304    
-192   176    
160    368    
144    -416   
-336   -1120  
-80    -896   
1360   736    
-880   -176   
-944   -1280  
1104   -640   
-368   336    
-384   -1056  
368    -592   
-48    -352   
-400   -576   
-240   -256   
224    -320   
-32    176    
-144   -96    
176    -544   
-128   -1600  
-32    -128   
64     -800   
-432   -1392  
160    -1520  
64     368    
176    48     
176    240    
-480   -288   
384    640    
-304   1440   
224    288    
-208   880    
672    944    
-448   416    
-128   -448   
656    448    
-176   -2160  
-544   240    
1104   -608   
192    528    
432    656    
-832   992    
-160   592    
384    -304   
-304   256    
480    -208   
-496   368    
-208   -208   
64     400    
-272   32     
-144   368    
480    -768   
-400   384    
-288   304    
128    144    
1296   -256   
-272   0      
992    -880   
-48    -1216  
-768   -1056  
448    -112   
832    1600   
-144   -704   
-512   128    
-32    -352   
144    128    
160    128    
160    -736   
-208   -1264  
-288   -80    
96     -464   
-128   208    
-224   352    
368    544    
-272   16     
-64    -160   
-224   -48    
960    -96    
-1024  -160   
-288   -272   
-208   -304   
-32    -944   
576    -208   
-112   368    
-80    64     
32     -32    
-208   -128   
112    -48    
400    160    
-400   -80    
-208   -496   
416    -192   
240    1008   
-272   0      
-16    16     
-256   32     
160    -416   
0      16     
-160   -400   
224    1456   
144    496    
-64    720    
-64    -320   
0      -336   
-32    128    
336    720    
608    240    
-704   -64    
-32    -240   
576    416    
-560   560    
-208   -432   
192    -1056  
-32    -720   
-16    16     
128    -128   
-32    -208   
-160   -48    
256    80     
-320   -48    
176    352    
-128   224    
-304   128    
112    -240   
-112   -352   
16     -80    
96     -112   
48     48     
224    176    
-80    144    
48     176    
-16    -608   
-144   -224   
16     -32    
992    1456   
-1680  1152   
1104   -48    
-688   -96    
0      -576   
-192   -464   
176    96     
48     80     
192    832    
-256   96     
-336   304    
-16    144    
80     16     
-112   -160   
-96    -160   
0      -496   
-80    -448   
112    400    
320    48     
-160   192    
-480   -384   
304    -1136  
-848   192    
688    64     
-880   -96    
96     288    
-272   160    
-48    -256   
240    0      
-592   -176   
-48    48     
208    224    
-144   -48    
-96    96     
64     -48    
-832   -128   
416    16     
-544   -48    
576    -96    
-832   48     
368    96     
-128   96     
-160   16     
-112   0      
-368   -144   
464    128    
-416   96     
-192   224    
288    -16    
-176   352    
-2240  240    
160    -944   
2512   -576   
-1088  -672   
-976   -288   
-272   -48    
1152   -16    
-608   96     
-256   192    
192    32     
0      192    
-224   -112   
-192   -48    
-160   -128   
-16    64     
64     -32    
176    176    
-80    16     
-336   -112   
-96    192    
208    32     
-592   -448   
-336   368    
1680   -288   
-528   -32    
-608   112    
496    48     
-80    384    
-528   160    
240    -48    
-48    -16    
112    256    
-192   -128   
176    432    
-416   16     
-208   80     
560    304    
-672   544    
256    496    
-176   128    
32     32     
128    -208   
336    -144   
-896   320    
1424   -272   
-544   80     
-448   272    
-224   -368   
64     256    
336    -288   
512    -64    
-64    96     
-464   16     
112    -32    
304    256    
-112   -576   
-240   -368   
624    848    
-752   80     
-352   -272   
-528   -192   
160    224    
64     -80    
-352   32     
-80    -176   
816    416    
368    -208   
-336   160    
272    128    
528    112    
-2208  3808   
896    -832   
-896   688    
64     -576   
-224   -144   
304    560    
-80    32     
-416   512    
-112   96     
128    256    
432    0      
-256   48     
-32    48     
-208   144    
432    160    
-528   48     
32     -80    
-160   64     
480    400    
-416   368    
-160   544    
352    -256   
-480   80     
736    112    
-256   64     
96     368    
-32    112    
-96    192    
400    -256   
-336   240    
16     -48    
-144   16     
192    0      
-32    -160   
-80    -176   
-304   -384   
304    -112   
0      112    
48     304    
80     304    
-128   48     
96     256    
-512   -192   
288    -144   
448    64     
-368   48     
-128   160    
320    352    
176    144    
-320   128    
64     96     
-80    -96    
368    -288   
-672   -1632  
-304   -1184  
352    304    
80     560    
320    208    
32     432    
-416   368    
208    400    
-16    128    
32     16     
0      304    
48     160    
160    176    
-32    160    
112    208    
-96    240    
-80    80     
-32    -400   
-64    672    
304    -400   
-560   -288   
-80    48     
352    592    
352    384    
-336   -288   
-496   -896   
272    -176   
576    1328   
-944   -688   
-16    256    
656    752    
-640   -384   
-80    144    
224    -1376  
0      -608   
64     448    
-160   -400   
368    336    
32     160    
32     224    
-192   160    
-48    -32    
112    -64    
-32    -304   
16     304    
16     0      
64     -80    
-144   -304   
528    -416   
-16    800    
400    1264   
-256   304    
-496   -16    
-16    -240   
400    992    
-112   -48    
-240   -784   
128    448    
160    -16    
-64    496    
96     128    
-96    64     
32     144    
368    -80    
-544   -400   
-80    288    
-64    784    
192    224    
112    -368   
-32    -320   
-144   -48    
208    -1168  
96     416    
0      192    
-32    304    
16     96     
0      -16    
1504   1280   
-1504  544    
-1648  -368   
2160   912    
-368   944    
-624   496    
528    624    
-32    -416   
-48    208    
208    208    
256    16     
-304   -64    
208    64     
96     128    
-368   272    
48     80     
272    64     
-112   -64    
-144   176    
112    -80    
-112   0      
400    1056   
1040   -80    
-720   128    
528    224    
-400   976    
176    -1200  
512    -80    
-96    1344   
208    432    
0      -1120  
-80    -464   
80     336    
272    544    
-128   -256   
336    448    
128    192    
-112   0      
336    448    
-224   -576   
240    0      
80     -464   
-336   736    
544    -224   
544    304    
-368   816    
0      592    
-848   -1536  
256    -1072  
512    768    
-336   800    
528    928    
352    64     
160    448    
-800   -480   
512    -224   
272    208    
-128   752    
512    -432   
-400   -64    
208    -64    
304    64     
224    480    
-80    672    
-48    160    
368    -384   
-336   -64    
-240   -656   
-224   -448   
80     -752   
-608   -1392  
1616   -2176  
752    208    
-384   784    
-544   1456   
-144   -400   
656    -528   
-352   -1664  
-480   -1440  
192    656    
256    16     
336    128    
-96    -560   
-576   -432   
192    704    
384    32     
-224   -784   
-16    0      
-240   -320   
496    112    
160    560    
16     560    
16     160    
-816   64     
432    -528   
304    16     
-144   592    
208    -144   
-272   272    
240    432    
48     -448   
-32    -432   
496    -32    
-192   112    
336    -592   
-96    -288   
80     320    
288    -128   
-864   -480   
-64    -1408  
160    -64    
-64    -1088  
-16    -112   
112    16     
224    112    
16     192    
336    -64    
64     272    
96     -800   
-208   -1024  
80     -368   
704    32     
-1264  176    
-64    -112   
752    -32    
-288   -272   
288    -208   
-80    256    
128    688    
144    0      
-144   304    
176    -48    
-208   -448   
176    352    
240    16     
-128   112    
48     -16    
320    80     
160    688    
272    256    
128    -64    
-336   192    
288    240    
208    256    
-240   -192   
-176   -2960  
464    -352   
16     -48    
-224   272    
0      128    
-112   -48    
1200   2352   
0      224    
-1152  -80    
16     -240   
-928   -96    
400    -96    
-32    -176   
192    -16    
-416   -496   
144    -400   
416    -80    
-224   -32    
-160   128    
64     48     
256    -464   
48     -128   
-192   160    
-16    96     
-32    -144   
-256   -48    
464    -720   
-864   576    
736    -80    
-432   -112   
-48    -464   
256    -352   
-32    -768   
32     240    
-32    -32    
336    144    
-128   -96    
-32    80     
-128   16     
160    -32    
-128   -32    
-80    -416   
-800   -240   
240    -176   
-176   224    
432    -96    
-240   48     
-16    -496   
-48    80     
224    80     
-224   -224   
-16    208    
416    -464   
-608   96     
432    -96    
-64    64     
432    336    
-416   704    
256    96     
-896   -288   
1024   -496   
-896   -192   
-416   -656   
336    80     
16     -80    
48     -96    
-176   160    
272    -48    
-320   -16    
288    -16    
304    16     
-400   112    
-96    80     
464    -96    
16     -64    
-32    -192   
64     144    
-448   -144   
1952   48     
-1024  -64    
-128   304    
2048   -64    
-1104  -80    
384    128    
272    224    
-544   -64    
160    16     
-128   112    
112    -256   
-16    80     
112    -64    
384    80     
-128   -80    
-64    -48    
48     -384   
288    -160   
-336   -48    
480    1152   
-960   -208   
-432   320    
1008   -336   
-1152  -208   
640    -128   
560    400    
-512   32     
-96    -320   
-192   32     
-688   16     
0      256    
32     112    
-1360  -704   
-240   240    
832    368    
-464   416    
464    160    
-608   16     
208    -16    
112    48     
-464   16     
112    112    
-272   224    
-144   -64    
-976   -32    
144    -112   
-352   96     
16     -864   
-352   576    
1056   -288   
-1792  -304   
-336   -96    
384    -144   
176    48     
-192   304    
-272   16     
-112   96     
-464   -80    
480    -48    
0      0      
-480   32     
80     0      
0      128    
-208   48     
-400   -64    
112    -16    
-304   176    
-960   -80    
400    -400   
-144   -336   
-64    -336   
944    320    
-912   -112   
288    592    
160    176    
-176   -160   
80     384    
-288   -64    
48     272    
128    112    
16     -80    
-96    32     
-320   64     
-336   208    
-768   -176   
224    -400   
208    96     
-96    -16    
-112   0      
-144   720    
528    336    
-256   -208   
-448   -368   
464    -384   
-624   -656   
192    -16    
-256   112    
-112   -64    
-16    -368   
-80    1024   
752    -368   
-464   -16    
304    -336   
-464   -736   
-608   -1984  
-112   -1184  
64     -640   
-256   -192   
144    176    
-192   144    
16     224    
-128   -144   
-32    0      
-80    240    
-16    352    
-368   -176   
112    160    
80     256    
-48    464    
48     -464   
-48    -16    
-32    -224   
112    -64    
-80    96     
-112   240    
176    224    
-160   -192   
32     80     
-32    176    
256    1280   
-576   464    
-64    -144   
-304   112    
112    -32    
128    112    
-16    272    
64     16     
96     -224   
-16    -208   
16     -112   
16     96     
-16    0      
0      96     
0      -304   
256    144    
-752   -128   
-176   32     
160    208    
-208   -112   
880    -560   
-496   576    
192    -80    
-112   -32    
-32    144    
160    32     
160    80     
-112   -240   
-224   128    
-32    -80    
288    176    
32     -96    
224    208    
-448   16     
-16    96     
224    -96    
48     80     
0      32     
48     -112   
176    -80    
432    -96    
0      320    
-208   0      
224    368    
-16    208    
-32    96     
352    48     
-144   128    
-80    -16    
1488   1264   
-1520  768    
-1248  -416   
2144   144    
-688   -192   
-1184  -688   
640    320    
-816   -640   
-208   -1472  
160    -528   
48     -320   
-448   512    
144    -256   
96     304    
-176   -464   
0      368    
80     192    
-96    768    
-144   -240   
256    384    
-112   -112   
-464   784    
2080   -176   
-1088  256    
288    -64    
32     32     
-240   1120   
192    320    
-16    -992   
-256   -1024  
352    576    
0      144    
16     192    
-144   64     
-32    240    
96     64     
-160   448    
160    592    
-336   320    
144    608    
368    256    
0      -16    
48     64     
-128   960    
512    368    
-448   -944   
32     -512   
-528   -16    
784    -544   
176    -176   
-608   -288   
608    272    
0      -64    
96     80     
272    976    
-400   112    
-192   384    
240    928    
32     -240   
272    912    
-672   496    
160    128    
752    336    
-672   272    
-368   -64    
-288   -400   
448    -256   
192    240    
-1168  -224   
432    -224   
1936   2784   
-1728  1184   
-128   -256   
1984   -208   
-336   720    
-816   -80    
64     -288   
496    48     
304    -224   
-320   96     
48     192    
240    112    
336    320    
64     -144   
-352   -304   
96     -96    
144    -1344  
-272   208    
208    -448   
-544   -848   
272    -176   
208    0      
-144   80     
-528   64     
720    176    
-400   256    
192    -176   
-320   -256   
-80    -320   
160    -64    
16     -48    
32     -192   
16     256    
96     448    
96     224    
432    624    
-608   80     
144    112    
384    304    
-320   256    
48     96     
-400   -288   
560    -16    
480    32     
-416   32     
176    352    
80     -144   
-224   80     
208    -1088  
-112   176    
-176   112    
-128   -880   
-176   -96    
480    720    
-448   -48    
32     208    
544    -112   
-432   32     
160    656    
-304   80     
272    176    
32     -144   
-160   -48    
160    -288   
-112   144    
128    -112   
416    -32    
-288   80     
-112   224    
400    -336   
-32    512    
-80    -32    
-48    -496   
32     48     
16     80     
-48    432    
-256   -400   
128    64     
192    -688   
-144   64     
304    704    
-448   -1872  
-1120  432    
1696   -240   
-624   -96    
-304   208    
-32    304    
848    -224   
-384   -192   
-112   -272   
112    272    
-48    -256   
320    320    
-48    -336   
-192   -320   
208    528    
-96    48     
112    -112   
240    208    
-96    96     
-256   -96    
864    448    
-112   -592   
-656   -160   
544    32     
-240   -48    
96     -208   
208    320    
416    -176   
-544   0      
-16    -496   
240    320    
656    -64    
-544   208    
-144   16     
192    -576   
224    32     
144    -416   
32     256    
64     -80    
-16    128    
272    -112   
-128   112    
-16    -384   
112    192    
416    -48    
-464   -672   
192    -16    
32     -1264  
176    480    
-2528  -2400  
864    -1232  
2784   720    
-1584  -432   
208    48     
-224   -768   
848    -640   
-192   -336   
-544   -480   
608    -256   
-64    160    
176    -720   
-32    144    
-192   -848   
272    160    
368    -80    
-320   80     
160    -208   
160    -512   
16     -192   
112    -784   
-208   -432   
-784   1232   
1536   -320   
-240   64     
-288   -96    
672    176    
-560   0      
-224   -64    
416    112    
-112   -96    
32     -128   
-16    -96    
-112   -592   
96     16     
512    -176   
-96    64     
-64    -1664  
-16    272    
224    -320   
96     0      
-176   -480   
720    176    
-16    -192   
-48    -32    
-32    -112   
-720   48     
-448   -224   
80     -128   
-400   192    
176    -80    
-192   -368   
688    -864   
-96    352    
-464   -288   
496    -48    
32     16     
-352   -80    
384    -16    
-48    -16    
-32    -48    
160    -16    
-352   16     
80     16     
128    -80    
400    -80    
-128   -192   
-336   -224   
304    160    
80     -2128  
-1632  -752   
-512   208    
32     -16    
-352   -96    
976    -272   
-80    -1072  
-512   464    
496    -64    
-384   -144   
-560   64     
-240   -64    
384    192    
-656   32     
416    -144   
96     -672   
224    -192   
-256   96     
240    16     
-160   1136   
112    1248   
-32    144    
-16    -272   
-384   -224   
1136   128    
-1120  112    
0      -128   
-48    16     
-384   -1296  
128    -992   
-176   48     
176    928    
-64    32     
-48    -304   
256    144    
-112   -48    
32     240    
-208   -48    
128    224    
336    96     
-368   64     
176    -304   
-64    -400   
-336   -896   
-240   -672   
288    160    
-32    704    
-80    208    
704    288    
-400   224    
-128   -240   
-240   0      
-224   -176   
1344   -400   
-688   -896   
-384   -240   
416    -560   
-224   736    
160    1472   
-240   320    
256    -544   
-272   544    
-48    -368   
240    112    
-320   48     
0      -96    
112    64     
-16    176    
-112   112    
160    160    
-112   -80    
-16    -80    
128    32     
-32    -16    
48     96     
-416   -272   
-448   0      
-128   384    
-288   -48    
160    -144   
-560   96     
-96    128    
0      -304   
320    -192   
-304   -32    
-480   -80    
272    176    
288    64     
-240   -320   
-48    -112   
-336   -96    
-176   160    
352    -32    
-32    -64    
-272   208    
-352   -160   
0      80     
-144   0      
-448   -64    
-96    256    
80     160    
-304   -624   
960    -640   
-288   496    
-80    -32    
16     -96    
-288   32     
544    496    
-576   912    
288    -80    
48     48     
-48    -176   
-384   -144   
336    -64    
80     144    
-16    384    
-32    -256   
-96    48     
-32    -384   
112    320    
0      80     
-112   -128   
80     400    
32     48     
16     -240   
-80    -96    
96     -32    
64     -112   
48     96     
-736   -144   
-400   208    
1136   1120   
-784   752    
-1120  -144   
1520   256    
-672   -368   
-480   -1568  
816    -208   
144    1392   
-272   -560   
352    -928   
-208   -96    
-336   96     
256    96     
-320   -96    
-176   416    
112    16     
272    -64    
-192   128    
-304   -1024  
128    336    
48     224    
-496   576    
2608   -176   
-1440  496    
128    -1024  
-352   -496   
-176   32     
-48    912    
336    336    
-16    -352   
176    -800   
208    -48    
-32    288    
16     -16    
-336   -48    
688    272    
128    64     
-176   352    
-96    304    
-496   -112   
384    0      
-16    -192   
272    400    
-496   -1584  
1712   -2032  
-976   -752   
-784   -368   
752    544    
-272   -240   
-192   64     
592    416    
-48    48     
-272   0      
-64    -432   
-64    208    
624    896    
608    -32    
-496   -368   
464    -32    
208    800    
-352   -320   
-144   144    
608    -16    
48     160    
-384   288    
-240   -544   
320    -16    
224    192    
-608   16     
96     1280   
528    224    
960    -1760  
352    336    
560    192    
-976   -16    
-256   400    
1104   528    
144    304    
-512   112    
48     96     
96     0      
128    240    
96     -80    
-32    304    
144    80     
-144   80     
-96    48     
-16    -32    
-416   144    
752    -928   
-320   272    
304    64     
-336   224    
-736   -16    
736    144    
112    -32    
-304   192    
-80    -96    
0      128    
-112   -128   
576    288    
-416   -16    
-80    224    
560    32     
-480   160    
-144   -336   
464    96     
-320   -544   
192    208    
96     224    
32     208    
-96    0      
0      192    
64     32     
-304   160    
80     64     
64     -256   
-144   112    
16     -112   
-96    96     
240    96     
0      48     
464    -208   
-608   688    
464    192    
-112   96     
-320   -144   
-192   -48    
384    48     
128    176    
208    48     
-192   0      
176    176    
-112   -80    
-32    32     
176    288    
0      224    
112    160    
144    368    
-368   240    
144    -32    
-48    176    
112    -16    
-128   64     
80     -416   
-128   32     
-208   336    
272    -256   
-160   144    
80     112    
48     128    
-128   1616   
1936   -576   
-1328  368    
-480   64     
800    224    
160    16     
-192   -64    
-208   304    
384    -512   
16     448    
144    -16    
128    -288   
-144   224    
64     -64    
224    -80    
-48    256    
48     48     
16     -304   
160    176    
80     160    
-288   -752   
256    -432   
-208   384    
-160   64     
528    176    
-320   -480   
224    -320   
-80    304    
-240   -1120  
240    -16    
128    192    
16     -208   
-240   96     
176    64     
240    128    
-80    48     
-336   160    
48     400    
208    0      
-32    -16    
96     48     
-144   -320   
-128   128    
160    -128   
-48    32     
384    -96    
-384   80     
224    48     
-112   80     
1168   832    
-112   816    
-544   640    
1024   16     
160    -64    
-1120  -192   
608    240    
-16    -400   
272    -240   
-192   -272   
80     176    
-208   -1008  
-16    96     
48     -208   
-64    -96    
176    144    
32     -32    
-128   240    
0      80     
320    16     
48     -48    
-400   -432   
1040   416    
-608   192    
32     -896   
-112   400    
16     -992   
208    288    
224    -896   
272    -32    
-368   80     
-128   144    
208    64     
240    160    
-128   -128   
176    32     
-32    144    
48     -96    
176    80     
16     80     
192    144    
-96    0      
400    416    
-448   -96    
-368   -32    
-320   32     
1008   -384   
-32    176    
-256   160    
224    96     
368    256    
-544   160    
-432   352    
1328   -336   
-384   48     
-560   32     
624    -432   
-16    160    
320    320    
-304   96     
-128   64     
288    112    
112    32     
-16    96     
-96    -112   
-160   -496   
704    -128   
-128   -32    
32     -48    
304    432    
-240   -528   
-1040  2400   
736    544    
-384   -1328  
-656   -384   
816    320    
720    32     
-688   336    
-368   -144   
-96    -928   
144    -176   
176    48     
-64    96     
-304   -256   
464    -144   
160    320    
192    -272   
-80    80     
48     64     
272    -512   
-144   -64    
48     -336   
-128   0      
320    224    
528    -384   
48     -32    
-16    -128   
192    288    
-496   -3488  
128    -640   
384    16     
80     416    
-352   -304   
-112   -224   
272    272    
160    160    
-32    -416   
0      224    
-352   -192   
48     -1072  
48     224    
-96    -240   
112    -256   
80     -736   
-208   -160   
64     432    
240    -1024  
-688   -1680  
176    -208   
208    -128   
32     368    
-272   -112   
544    800    
560    896    
-688   816    
400    160    
64     -16    
96     416    
272    -768   
80     -752   
-448   -192   
128    288    
112    -448   
160    0      
-16    -16    
-224   64     
96     128    
192    -352   
-416   -416   
-240   96     
224    -16    
-32    -32    
272    128    
-48    -16    
48     -80    
208    128    
-560   320    
112    48     
608    16     
-416   -16    
-160   160    
48     0      
128    496    
304    -80    
-368   -208   
-304   96     
112    -224   
48     -16    
32     512    
-144   320    
-304   -784   
224    -32    
-16    -1776  
-32    -64    
336    -256   
-64    160    
-208   -96    
144    -32    
96     -176   
16     0      
-304   64     
352    624    
-912   112    
352    -384   
496    -240   
-368   48     
144    416    
32     64     
208    224    
0      288    
48     128    
-32    32     
176    96     
-112   128    
-112   192    
-352   384    
96     -32    
-384   240    
-32    384    
544    -256   
-176   -528   
-288   32     
64     -192   
64     256    
-32    160    
416    -464   
-720   -112   
-224   144    
480    -48    
16     -224   
-464   -48    
-720   -1344  
-784   -512   
688    -480   
-672   224    
-448   240    
800    432    
-672   464    
-560   416    
464    -32    
-96    -48    
-320   -32    
64     0      
48     -80    
224    -192   
-208   -64    
16     32     
-144   -128   
32     -112   
112    64     
-176   -80    
-224   -496   
1232   576    
-928   -64    
-416   -448   
448    -256   
-144   -240   
32     32     
16     192    
224    64     
80     -192   
-976   256    
448    -64    
-224   -16    
-288   160    
-304   -208   
80     144    
176    -80    
-304   -128   
-192   160    
112    -48    
-112   96     
-32    16     
-288   32     
928    -368   
-560   0      
-16    -848   
-368   352    
-192   -992   
-160   -576   
288    -144   
-160   304    
112    176    
0      -80    
-32    -240   
288    176    
-256   -240   
-256   -192   
16     480    
-256   0      
80     64     
-336   -48    
-48    208    
112    64     
400    80     
-320   -336   
336    64     
128    -128   
224    256    
560    80     
-784   -1840  
-976   -2960  
-1152  -336   
384    16     
-160   16     
128    16     
480    0      
-464   640    
32     -48    
-160   -352   
384    -160   
-144   16     
-320   -32    
-32    48     
96     64     
-288   -112   
-256   160    
-96    32     
-48    48     
-416   -16    
256    96     
-704   -80    
-144   -160   
928    -48    
368    -160   
-944   176    
288    64     
352    16     
-16    -192   
-16    272    
0      32     
-400   192    
480    -16    
-224   112    
-80    -208   
288    -32    
-16    -288   
-400   -64    
176    0      
-496   144    
256    64     
-144   80     
224    112    
-192   0      
-64    256    
480    160    
160    320    
-352   96     
0      128    
96     64     
-208   -64    
-272   -112   
-64    16     
112    192    
384    1152   
528    272    
-608   208    
272    288    
512    192    
-272   0      
-240   112    
240    -16    
-256   -64    
-32    48     
-32    96     
144    64     
-224   272    
48     448    
64     -176   
0      -160   
-192   16     
48     112    
192    336    
-240   272    
96     256    
16     -160   
176    -576   
-704   576    
304    -64    
112    -544   
-32    -32    
-640   -2368  
-416   672    
784    80     
-704   160    
592    192    
-288   -416   
-160   320    
-32    -320   
-16    96     
288    224    
-544   352    
96     -224   
64     320    
64     -464   
-320   304    
-64    16     
128    112    
80     496    
80     -16    
-176   -224   
0      368    
-288   -448   
-304   560    
928    48     
-672   224    
-16    -64    
0      48     
544    400    
-608   416    
64     32     
-304   -32    
64     -80    
400    -16    
-352   80     
-128   -96    
144    16     
0      64     
0      80     
-80    160    
224    32     
-48    112    
-48    96     
-96    96     
-208   112    
608    32     
-544   16     
96     224    
64     112    
-80    48     
288    848    
-1424  272    
3904   1328   
-576   672    
-1024  -144   
1504   96     
-1232  512    
-32    768    
368    320    
16     128    
-80    32     
-64    -48    
112    32     
-128   224    
304    64     
-288   144    
48     32     
160    496    
-384   -64    
384    160    
-128   -128   
-240   192    
624    1008   
1120   176    
-624   176    
-416   736    
304    112    
528    -32    
-160   272    
-80    192    
-160   -16    
176    160    
80     64     
-16    48     
48     160    
144    0      
48     176    
32     48     
-32    176    
-192   -160   
480    176    
48     16     
64     240    
32     176    
-320   304    
-352   32     
208    -320   
-192   -384   
-400   160    
480    -32    
144    208    
-800   384    
384    -112   
-176   272    
-240   -400   
-320   240    
288    -256   
-16    -1984  
672    112    
-288   32     
-208   48     
176    160    
224    16     
96     64     
-80    224    
-288   64     
320    1040   
512    288    
-272   0      
-224   -432   
32     -496   
1344   -240   
-2176  -1728  
-912   176    
1312   -752   
-352   -272   
-976   -320   
-80    112    
848    1232   
-96    -512   
-288   64     
-256   -448   
64     224    
112    368    
48     -224   
-256   128    
-320   256    
320    -1056  
224    320    
-272   400    
-32    480    
224    80     
144    -320   
48     32     
304    624    
0      144    
-96    80     
48     -336   
64     -400   
128    176    
-176   -336   
80     368    
48     -304   
-112   -64    
144    -2112  
-32    320    
-64    -176   
192    -304   
-592   -1056  
208    416    
112    272    
-16    320    
-192   -384   
-192   16     
80     48     
80     -320   
288    176    
-80    -224   
-112   432    
128    -464   
192    -384   
-176   -240   
-16    1200   
1056   752    
-320   448    
-32    1120   
288    1152   
96     -176   
48     128    
-80    -1456  
-272   -304   
-16    256    
-80    -464   
336    64     
-96    -176   
-272   96     
32     -32    
384    -96    
64     112    
-80    48     
208    -32    
16     272    
128    160    
96     -160   
240    96     
-192   -672   
-224   352    
32     64     
-224   112    
0      -96    
352    160    
-208   -496   
400    -160   
-176   384    
112    -816   
176    448    
288    512    
-624   496    
160    112    
480    400    
-256   208    
-304   256    
80     -64    
176    48     
112    -64    
128    176    
-176   -144   
48     224    
336    224    
128    -512   
-160   272    
480    272    
-592   -336   
432    -272   
224    -1296  
-160   352    
-208   240    
176    400    
192    112    
96     -336   
-16    -224   
-96    368    
288    224    
80     -208   
-192   -704   
32     192    
-384   -416   
128    -256   
48     -176   
-128   -304   
-112   0      
144    -416   
48     -224   
16     128    
-176   64     
336    32     
-256   96     
0      -128   
64     64     
-64    -208   
304    752    
-352   -1344  
-896   -496   
640    32     
-624   -576   
800    -144   
112    -896   
-688   16     
544    -272   
-80    448    
304    -224   
-272   240    
128    -80    
128    192    
48     -160   
-624   -64    
416    -128   
-32    16     
32     16     
0      -320   
32     16     
0      -352   
144    -720   
-944   480    
1040   -32    
-704   -160   
96     112    
752    -112   
-448   496    
-384   -96    
160    128    
0      -144   
-16    -224   
-784   -208   
-112   64     
160    -160   
160    32     
160    -112   
-384   -544   
96     -64    
-304   -592   
288    64     
336    0      
16     -192   
-1408  560    
208    -224   
-48    -160   
-320   -160   
-144   -144   
-560   -16    
16     -400   
-160   -192   
416    -192   
-48    -432   
-64    80     
112    -192   
112    160    
-80    256    
32     96     
-176   128    
-432   -48    
352    16     
320    -176   
-464   0      
224    256    
-704   -48    
-80    -800   
-80    32     
80     304    
304    16     
-416   -640   
1664   -2464  
-2784  -272   
1872   496    
416    144    
-640   400    
-64    -112   
0      144    
128    112    
-48    -64    
-208   -192   
-512   -192   
256    112    
-48    -128   
0      240    
-240   -1248  
-80    192    
224    -16    
-544   80     
-96    -480   
832    288    
-144   -464   
-208   16     
-48    176    
-800   -336   
432    -32    
624    -160   
-672   208    
320    -128   
-176   272    
336    -176   
-80    80     
112    0      
-160   96     
272    272    
-560   -272   
128    144    
224    -16    
96     96     
32     -16    
-304   80     
256    -352   
-304   -64    
-336   -240   
320    336    
-480   -224   
0      128    
272    -672   
-1328  -352   
240    -48    
-400   32     
496    96     
0      -480   
288    -160   
-304   -144   
-144   -80    
-544   -272   
-256   160    
-176   160    
-256   352    
304    80     
192    144    
64     32     
-128   -32    
-224   176    
64     80     
144    16     
-288   96     
-288   352    
288    16     
-352   -144   
16     -96    
112    48     
-80    -160   
96     64     
-64    144    
16     16     
32     -80    
-64    16     
96     304    
-336   -48    
0      144    
656    2576   
1344   -208   
-1840  352    
320    0      
432    -48    
-272   240    
16     -352   
-160   272    
96     -512   
-16    -80    
224    192    
-256   -96    
-128   -16    
0      -352   
112    16     
-288   160    
64     -224   
-1040  -32    
112    48     
144    -224   
560    1200   
-1520  -160   
432    208    
736    352    
-240   -224   
-48    112    
-288   -32    
128    -144   
64     -96    
144    -16    
-240   112    
-288   240    
64     -32    
160    160    
-432   -288   
160    -192   
-128   128    
48     -96    
96     160    
144    176    
-336   112    
-640   256    
656    -80    
-160   48     
208    -208   
-384   -32    
144    128    
-368   96     
-64    -336   
400    -240   
-672   1568   
1968   272    
-960   -80    
400    -400   
48     -32    
-272   96     
416    -272   
64     -288   
-224   -144   
64     0      
-64    -32    
-16    80     
-272   64     
16     128    
-16    160    
-80    64     
-112   -240   
416    -272   
0      -160   
-96    48     
-64    -160   
896    -128   
-1904  32     
1168   -32    
448    32     
-992   -512   
736    -560   
-560   -96    
272    416    
-272   -208   
-336   224    
272    128    
-32    192    
-64    64     
-48    -320   
-80    -160   
96     128    
112    -176   
-416   -112   
-128   -112   
0      32     
64     64     
-160   -704   
960    -1024  
-352   -816   
-400   -272   
432    80     
-768   -112   
192    0      
432    672    
-32    128    
-320   -320   
-112   -192   
32     96     
-352   272    
416    -880   
384    -368   
-304   752    
128    336    
272    496    
208    160    
-192   256    
-128   -384   
-32    -208   
224    32     
-304   -64    
32     -144   
512    -368   
-208   -256   
192    160    
672    1968   
-240   416    
-32    -48    
656    -448   
288    -48    
-480   1440   
48     1616   
80     192    
304    -800   
-224   576    
-80    -432   
-96    208    
384    0      
240    -192   
-448   432    
-208   608    
320    208    
336    -64    
-112   480    
-48    528    
-48    128    
144    -336   
320    -96    
144    -64    
-768   -144   
288    592    
128    0      
-112   -1536  
-304   -1680  
192    784    
80     224    
-176   -96    
-80    -176   
112    560    
-32    1152   
176    512    
544    -160   
-160   304    
-32    288    
32     256    
16     -16    
144    -144   
-32    560    
144    112    
-176   -496   
432    -224   
-80    384    
-192   -144   
-432   -416   
0      -160   
288    112    
496    416    
48     496    
-544   -224   
96     -240   
272    -192   
-208   -400   
224    -1584  
-464   -848   
176    896    
-96    128    
0      -352   
144    496    
64     64     
80     464    
0      832    
32     368    
64     160    
-16    -224   
-80    384    
128    240    
80     -192   
0      -144   
-32    -80    
64     320    
176    496    
-240   -720   
256    -704   
64     -2560  
-192   160    
608    1408   
-1072  1328   
128    -208   
592    -976   
0      -1200  
-112   544    
656    480    
-32    544    
-272   416    
64     304    
64     192    
144    -64    
96     -208   
-208   -240   
-160   -16    
208    96     
240    -320   
-272   48     
16     224    
80     112    
368    752    
-672   64     
608    -64    
-368   704    
-112   -64    
96     112    
80     320    
128    320    
-144   -448   
160    64     
-96    -1808  
-48    112    
96     -80    
176    -32    
-320   320    
624    832    
-320   800    
-160   -176   
0      -16    
176    -160   
-192   160    
-32    -96    
336    80     
-80    64     
-64    -64    
-112   -1296  
336    -128   
-16    272    
-16    80     
-64    336    
-880   2096   
2464   416    
-800   304    
-720   -256   
288    160    
1312   368    
-528   64     
-160   96     
512    96     
-576   32     
256    -96    
32     96     
-32    -192   
-32    -16    
192    144    
64     0      
272    192    
48     288    
-176   128    
288    -192   
-80    112    
-448   -368   
-192   176    
1008   -544   
-944   48     
176    -96    
-48    16     
160    -192   
-96    -112   
-96    144    
208    32     
0      96     
48     64     
-80    160    
-208   -144   
320    144    
112    -368   
64     0      
-176   -256   
336    -304   
-160   -96    
-240   -128   
1168   -512   
-512   160    
-1456  -32    
768    -256   
912    272    
-128   48     
48     -1072  
0      -512   
-592   -128   
80     -144   
352    -32    
240    -128   
-48    -64    
-560   -400   
128    -496   
448    -64    
-128   -672   
-528   48     
-144   112    
1168   -224   
-432   -208   
-592   -480   
-448   -368   
768    304    
1344   240    
-992   -720   
-688   0      
1408   -128   
-1440  3056   
1184   -2032  
-1824  304    
128    -1088  
992    -272   
544    -80    
-1168  288    
-320   -448   
448    160    
480    -160   
-640   -112   
400    -96    
-176   -384   
48     -240   
160    432    
240    -160   
-560   -112   
896    16     
176    -240   
-1456  -32    
1072   -64    
-288   32     
400    -304   
-352   -272   
-112   128    
400    -144   
-384   32     
208    -400   
240    96     
-304   -384   
-16    272    
160    -112   
64     32     
400    -224   
-80    -96    
-336   32     
336    160    
-240   0      
-208   48     
48     -32    
-96    -176   
368    -16    
-272   -368   
96     -128   
320    -176   
-224   0      
64     16     
272    656    
-160   528    
96     608    
-48    80     
-192   288    
208    -304   
-448   -16    
-592   -224   
-176   160    
-48    96     
352    32     
16     -368   
-464   -528   
16     0      
192    -464   
48     272    
64     64     
48     -144   
-32    96     
144    -224   
-256   -240   
288    -384   
-208   -64    
32     -48    
-48    288    
-256   0      
0      112    
240    -176   
256    16     
-352   -448   
32     -400   
224    -80    
96     -224   
528    576    
-2192  1216   
1440   -192   
96     -464   
-464   -752   
-240   -544   
-512   -576   
272    -432   
192    -272   
112    -128   
-272   112    
-224   -96    
272    352    
240    336    
-416   352    
-272   -320   
560    -640   
0      -560   
0      -544   
0      80     
-80    -528   
144    -624   
-208   400    
544    -656   
-288   -384   
608    464    
-80    784    
32     -112   
-288   -528   
288    -128   
0      176    
0      112    
16     -96    
-64    -176   
-48    192    
64     -48    
224    -64    
-176   64     
96     -320   
48     176    
144    320    
-64    -640   
384    48     
64     32     
-144   80     
-128   -272   
-16    64     
112    304    
0      -16    
-128   16     
304    -320   
-2528  32     
64     64     
48     -400   
-704   -432   
256    -320   
16     -848   
-864   -1168  
272    -272   
32     896    
-112   -64    
-432   -112   
-16    64     
176    96     
-32    32     
-160   -240   
-80    32     
112    -160   
144    176    
-400   32     
-432   -736   
1408   1072   
-64    -432   
-1376  864    
1120   816    
-464   -192   
-976   -816   
528    -400   
-688   -384   
-480   -160   
0      96     
192    80     
80     -160   
-240   -144   
-80    -496   
-16    -48    
-48    64     
304    -688   
-832   -1600  
-80    -768   
416    48     
-32    480    
-144   352    
256    480    
-688   848    
336    -400   
688    384    
-880   368    
-32    16     
272    -432   
-48    640    
-288   160    
80     192    
288    0      
-240   -80    
592    32     
-464   -400   
-128   832    
-80    1120   
-208   608    
352    368    
-224   400    
-32    528    
-176   784    
-32    -240   
256    -112   
-448   64     
32     -304   
128    -176   
32     96     
896    2112   
-928   640    
-576   752    
2480   -1504  
-400   -832   
-1632  -224   
432    -176   
944    272    
240    848    
-224   240    
-32    0      
224    288    
16     -288   
-112   48     
-464   -560   
-352   -160   
336    192    
-160   288    
-320   32     
16     -432   
-448   -240   
32     160    
16     80     
1040   -208   
-1088  224    
544    -176   
-112   -384   
-32    -1712  
-16    -448   
288    -176   
32     720    
-208   64     
-160   256    
96     -608   
32     -160   
-192   80     
304    624    
-1008  -496   
-32    -288   
336    -464   
-928   -768   
-48    -672   
176    480    
112    688    
-192   -752   
-480   -224   
160    304    
-144   -448   
384    176    
-128   624    
-368   240    
576    400    
96     0      
-144   -752   
-224   848    
1072   128    
-592   -176   
288    608    
32     32     
-400   -544   
-256   -288   
-48    -144   
288    -272   
-528   -352   
32     160    
-16    608    
288    272    
16     288    
-64    224    
-208   48     
208    160    
16     80     
-128   -64    
160    96     
-32    48     
-16    304    
176    1008   
304    528    
-176   -144   
-160   112    
-288   -272   
416    -2224  
-432   704    
512    96     
-432   -176   
192    208    
-192   336    
432    384    
-480   352    
-112   176    
32     64     
-48    160    
64     -80    
16     -304   
-128   384    
-144   32     
128    -240   
48     -48    
-192   192    
176    144    
-416   -320   
352    -1056  
-480   560    
704    144    
-128   64     
-352   160    
176    -160   
-96    368    
416    80     
-544   208    
128    96     
0      16     
288    -16    
-160   176    
-16    0      
-48    64     
144    112    
256    160    
-176   272    
32     -32    
-96    176    
384    0      
-176   112    
336    144    
-368   80     
80     240    
-80    144    
336    32     
-112   0      
-112   144    
256    -720   
-2160  -624   
2496   304    
-480   368    
-1056  -80    
656    80     
336    64     
-64    192    
-80    192    
16     -768   
288    64     
-64    96     
-32    96     
96     0      
-320   32     
432    32     
-160   80     
16     192    
160    144    
48     -32    
0      160    
192    304    
-1472  528    
528    96     
608    560    
128    -272   
-176   -224   
192    48     
-336   272    
-256   208    
336    80     
464    112    
-48    16     
-352   224    
144    160    
32     32     
-80    0      
48     176    
400    0      
-48    -32    
-832   208    
384    -1104  
752    128    
464    0      
-592   208    
0      -320   
-400   -80    
304    -112   
-160   -384   
64     992    
-624   368    
32     320    
896    -208   
-176   400    
-432   -272   
-160   -32    
672    -1360  
80     48     
-256   272    
-736   -96    
64     256    
160    64     
-80    256    
160    192    
-96    -144   
-160   48     
144    16     
-80    176    
-320   144    
-320   -848   
1872   -2320  
-2720  -928   
1664   848    
-32    -464   
-288   112    
528    -368   
-336   176    
-416   288    
592    128    
-288   272    
400    0      
-96    64     
-48    -96    
32     112    
-144   -112   
368    32     
-80    64     
224    96     
-48    -832   
464    -560   
-208   -752   
256    80     
-320   48     
-656   -80    
224    -16    
528    128    
-160   96     
-112   -176   
112    0      
288    -96    
-32    16     
64     -384   
16     240    
368    -992   
-464   -80    
-128   -448   
288    -208   
192    -16    
-128   96     
-16    80     
288    240    
0      208    
192    224    
208    416    
-224   0      
224    144    
-48    -160   
224    112    
-288   -272   
80     384    
448    112    
112    464    
-912   224    
448    -800   
-336   -944   
176    32     
-80    672    
64     560    
112    272    
-80    240    
160    64     
640    944    
-784   784    
320    624    
464    640    
112    -272   
-112   608    
-112   320    
288    -288   
192    144    
0      -208   
64     -1424  
80     -176   
-16    -848   
48     -48    
128    272    
144    0      
-240   -592   
0      -240   
112    -2416  
96     160    
-320   400    
1072   -592   
-864   432    
336    528    
-208   -448   
0      -144   
-224   -544   
128    -400   
16     16     
80     -528   
176    -336   
-128   0      
-96    -96    
240    -1392  
80     80     
-16    -16    
-80    576    
128    -272   
-32    -80    
-544   -192   
128    -1008  
-464   -160   
448    0      
-144   -608   
400    -368   
80     64     
-304   352    
224    592    
-192   -288   
16     -224   
192    352    
64     320    
-176   -48    
0      -368   
-272   64     
160    -80    
-64    -128   
-32    -16    
128    -240   
288    -464   
48     32     
64     -384   
-48    160    
-80    -32    
128    -16    
256    -272   
-48    16     
-208   112    
112    112    
64     48     
-240   1472   
2064   -1200  
-1712  0      
432    -272   
848    -384   
-368   80     
400    224    
-240   624    
-304   -1360  
-32    128    
256    272    
-64    16     
-80    96     
112    -16    
176    144    
-112   96     
-96    112    
-64    320    
32     -416   
240    -48    
-16    -720   
-1376  752    
1520   -528   
-688   -560   
736    160    
-384   432    
272    352    
-112   1744   
368    1088   
64     -176   
-240   -304   
-48    -464   
-64    -496   
-192   -704   
608    -256   
-736   -96    
224    -768   
144    -1264  
-48    -1888  
-32    -400   
-176   128    
96     96     
-208   224    
-272   -336   
144    -160   
512    640    
-928   320    
-112   480    
384    -528   
-480   -224   
-96    32     
288    288    
-32    -128   
0      -240   
-64    528    
0      768    
80     -240   
144    -464   
-544   -432   
-144   -144   
-32    -64    
-176   -160   
-80    -864   
-320   -496   
400    176    
-464   64     
80     -32    
16     640    
304    -272   
-224   -32    
-368   1968   
1248   176    
-976   32     
-576   -304   
1296   112    
80     -400   
-352   128    
-192   272    
16     64     
416    576    
-208   64     
-688   -832   
-48    -384   
-240   0      
-304   384    
-208   384    
-960   -256   
64     16     
432    0      
-112   -416   
-112   -256   
144    224    
-736   128    
224    1760   
1072   400    
-1056  592    
160    -576   
-32    480    
688    -432   
-576   -160   
48     -432   
-432   -32    
-16    64     
-784   48     
-96    192    
336    448    
160    -80    
-144   -320   
-112   -176   
32     -720   
320    -480   
-240   -208   
48     512    
-128   128    
256    -224   
-416   -368   
144    -624   
-208   -272   
-368   -128   
80     336    
-624   144    
-352   32     
-704   -320   
96     368    
-496   -128   
384    432    
432    -416   
32     -640   
-496   -80    
-32    224    
464    48     
-128   -16    
-272   48     
96     208    
-64    -32    
80     80     
192    -192   
-256   -48    
-176   336    
288    16     
256    -112   
-176   224    
-80    208    
-160   -112   
-32    80     
368    -16    
-192   32     
-256   144    
80     32     
176    0      
-1072  -1472  
1104   -560   
-640   -208   
-608   192    
960    -16    
-368   192    
-96    144    
-128   128    
-368   624    
528    -368   
-240   160    
-160   -112   
-208   -16    
176    -368   
112    144    
-256   -304   
64     80     
-112   208    
-16    -32    
256    16     
192    -688   
-1200  720    
864    -16    
-304   -32    
-304   0      
592    -64    
-640   352    
0      96     
-64    224    
800    -96    
-400   -48    
-384   96     
96     -64    
0      160    
208    144    
-16    176    
64     -64    
-448   0      
592    -16    
-416   80     
256    48     
16     64     
-48    160    
272    368    
-448   128    
-144   176    
112    -32    
-176   -64    
240    32     
896    368    
-1344  1264   
1312   496    
-320   -464   
-432   -224   
1280   176    
-704   -160   
-704   768    
432    448    
-32    144    
48     -32    
-448   -144   
128    80     
-64    0      
384    208    
-368   16     
208    80     
-208   160    
64     -48    
64     64     
112    48     
240    816    
-160   -448   
-688   240    
864    64     
-1120  80     
512    320    
208    160    
-128   -96    
-368   256    
128    48     
48     32     
-192   80     
176    112    
-64    96     
144    64     
-192   144    
0      -144   
320    -128   
-256   96     
160    192    
-144   48     
-160   -368   
-784   416    
560    -176   
-1296  272    
352    -48    
736    -96    
656    -112   
-624   0      
-176   0      
32     160    
-160   16     
-32    192    
160    272    
-160   -80    
-304   80     
-16    224    
-336   -528   
112    128    
-80    240    
-496   32     
464    80     
48     16     
-176   64     
32     352    
-128   160    
320    48     
320    208    
-560   96     
1840   4592   
-416   2256   
368    80     
1360   -496   
-992   -96    
-16    128    
528    144    
448    128    
144    112    
-736   -32    
432    160    
192    48     
240    112    
96     128    
-464   0      
144    288    
528    -48    
-272   -176   
-208   192    
448    1392   
432    480    
-464   -352   
128    -48    
-336   -80    
-560   -160   
1168   176    
-48    160    
-416   384    
-16    432    
288    -80    
0      -464   
-512   -432   
416    -1408  
-96    -192   
-80    64     
16     -208   
-80    -160   
-48    0      
304    -64    
32     256    
-208   -16    
112    16     
192    128    
80     416    
-80    128    
-64    608    
448    352    
-112   -48    
-144   464    
304    432    
192    848    
624    1296   
-1056  192    
-240   -720   
320    -176   
64     -544   
-224   -224   
-48    -544   
-112   176    
272    752    
128    240    
-48    -736   
-176   -592   
-32    -16    
-144   -1360  
304    352    
-64    -112   
-64    -112   
0      416    
-80    96     
112    160    
144    -16    
-160   80     
-48    32     
32     0      
256    32     
-256   -176   
128    -848   
224    -64    
0      -320   
-288   352    
560    -96    
-624   656    
496    176    
176    512    
112    32     
-32    224    
-112   144    
-144   288    
64     -16    
112    -192   
192    16     
-112   80     
-16    256    
256    -96    
-112   176    
-96    112    
-128   288    
80     -336   
320    176    
16     64     
-592   96     
560    48     
-480   -208   
368    -352   
-16    -112   
160    128    
160    -144   
-688   144    
176    656    
224    48     
64     -832   
-304   144    
-32    -224   
144    112    
112    -80    
16     112    
-96    -64    
96     208    
-16    80     
208    -176   
-240   192    
-16    -240   
96     128    
-16    -192   
448    -240   
-240   -480   
304    128    
-272   -144   
-160   720    
48     576    
48     688    
3024   -1168  
-1824  112    
288    -640   
272    -608   
-224   -544   
448    -80    
-1120  -768   
-320   -1760  
176    400    
272    64     
-32    128    
-128   -64    
80     144    
288    48     
48     160    
-208   -256   
-144   336    
176    -192   
112    32     
-176   -832   
-928   592    
2064   -160   
-976   -96    
160    800    
992    1792   
352    1328   
-736   672    
800    384    
192    768    
-304   272    
256    -160   
128    -64    
-512   -224   
240    -112   
-48    -1088  
288    96     
-16    128    
-352   -64    
416    64     
160    0      
-112   -928   
-256   288    
464    -320   
192    -624   
-736   -400   
464    -832   
-688   256    
-64    -48    
752    -240   
256    -208   
80     224    
-592   64     
96     272    
208    -48    
-656   -1216  
192    -880   
-208   -352   
-320   48     
448    64     
-176   -80    
-128   -400   
-144   -384   
80     -368   
192    0      
-384   -80    
-256   -48    
-176   -640   
1120   -192   
-496   -1296  
800    -1760  
832    448    
368    176    
-896   -224   
-560   832    
816    -432   
-336   176    
-592   -480   
176    592    
-224   -16    
192    240    
384    -272   
-592   -208   
-64    -160   
480    -560   
-320   224    
-48    -96    
112    944    
368    1344   
-112   832    
288    256    
-224   -384   
-128   224    
720    288    
-160   -400   
304    -352   
-16    -208   
304    384    
-128   -80    
-192   -304   
544    -48    
0      432    
96     -176   
-16    -128   
-160   -288   
368    -80    
288    48     
-336   -32    
0      32     
160    -64    
-256   -176   
-464   -80    
48     -112   
-384   -80    
144    -320   
432    16     
16     -528   
-464   -16    
96     128    
416    144    
-144   32     
-256   112    
560    -128   
96     -144   
-224   96     
512    -128   
-240   240    
0      704    
-224   352    
288    -384   
0      144    
0      -272   
-128   48     
112    80     
144    32     
-128   -336   
-80    -336   
-64    448    
-96    -32    
352    -96    
-96    16     
-64    32     
-80    -80    
96     -64    
208    -240   
32     240    
-48    -80    
-16    -32    
192    16     
64     16     
128    2032   
1904   -144   
-1904  224    
816    896    
640    64     
-448   0      
-176   -320   
-48    96     
-64    208    
144    -352   
112    128    
-64    -592   
-144   -32    
80     480    
464    -288   
-592   16     
272    224    
-32    -16    
16     32     
-80    -48    
48     -1088  
-528   608    
912    448    
-752   -48    
-48    0      
640    -16    
-592   48     
-752   -32    
48     176    
320    -32    
-592   96     
-128   -144   
32     128    
16     -224   
80     128    
-224   -176   
-352   0      
-16    -288   
-272   288    
336    -288   
-240   224    
208    -64    
-416   96     
240    112    
-272   -112   
-144   112    
-112   -176   
-576   112    
288    80     
1408   1664   
-2256  -80    
-1360  320    
2208   -32    
-368   -240   
-352   -144   
-304   352    
720    544    
-384   128    
64     16     
176    80     
-208   160    
-80    64     
80     -64    
-80    0      
-384   -80    
256    0      
-112   128    
0      -240   
-64    0      
-16    -16    
-288   -496   
912    384    
-400   96     
-128   224    
240    112    
-608   -48    
96     144    
240    -416   
-768   80     
384    160    
-400   -64    
48     176    
176    -64    
-48    160    
-336   64     
384    -32    
-80    240    
0      -192   
-32    -144   
-240   288    
160    160    
-224   -272   
-464   -16    
112    -192   
-544   112    
-160   -112   
256    416    
496    -368   
-400   256    
80     144    
192    64     
-160   48     
-192   144    
192    272    
-272   96     
-16    -224   
80     -32    
384    64     
-624   -160   
288    112    
160    48     
-432   112    
-80    -64    
32     48     
176    -208   
32     -208   
-96    144    
32     32     
336    736    
-576   128    
-592   2512   
1840   640    
-2000  -288   
-720   -416   
1856   64     
-432   -192   
-576   128    
336    352    
-176   96     
560    288    
-16    -48    
-464   128    
-64    -64    
128    208    
192    -64    
-272   192    
-96    208    
224    80     
-160   512    
32     720    
-112   464    
48     192    
432    -400   
-384   112    
512    528    
-448   320    
0      -48    
176    240    
176    864    
-48    288    
-448   -272   
208    176    
288    432    
-32    16     
-208   -112   
160    224    
-48    176    
-192   1232   
208    816    
-272   272    
112    16     
-32    224    
48     160    
-464   -576   
-240   -464   
480    656    
-352   1168   
640    96     
-544   -880   
-48    240    
-96    -192   
624    -32    
-400   896    
176    -144   
112    -624   
-400   -416   
192    224    
-64    -96    
-80    -48    
208    144    
-80    304    
-144   -80    
208    32     
-240   240    
64     -208   
-368   -608   
-208   -144   
48     448    
256    112    
-176   144    
112    64     
-48    112    
0      48     
0      -80    
16     64     
-208   64     
32     -32    
144    32     
160    80     
-144   144    
-144   16     
256    432    
592    192    
-416   144    
-48    176    
224    -240   
288    496    
-336   656    
16     192    
64     -192   
160    128    
-64    80     
112    128    
-432   -144   
512    -320   
128    672    
-16    368    
-144   -112   
-192   -144   
96     144    
192    288    
208    -144   
-112   160    
624    -96    
-304   64     
128    400    
-256   96     
416    384    
272    112    
-352   -400   
-144   64     
224    -16    
-64    208    
-16    240    
-80    64     
176    -144   
32     160    
336    -208   
-112   128    
-240   416    
112    80     
112    320    
112    224    
0      224    
-160   0      
16     -32    
528    32     
-176   256    
-32    -224   
-288   -80    
-304   -1280  
-1024  128    
864    192    
-720   1184   
288    272    
608    368    
-480   -496   
496    -1376  
384    1232   
48     1232   
112    576    
-240   -1648  
-240   -288   
624    320    
-32    176    
-176   160    
-80    -32    
144    512    
144    528    
32     352    
-336   -688   
1168   240    
-1136  -304   
224    -432   
624    -608   
-304   880    
16     1008   
-144   1376   
672    96     
-528   -176   
64     64     
288    80     
144    208    
-384   224    
80     288    
416    -32    
-320   16     
48     -496   
-304   96     
80     64     
16     144    
192    -752   
352    -96    
-48    -688   
-320   304    
-640   832    
240    -48    
16     -144   
-80    160    
16     -768   
-672   304    
272    16     
-96    -176   
144    384    
-80    -384   
240    272    
192    -560   
-896   416    
240    -1008  
-128   64     
-224   -400   
320    128    
304    -192   
64     512    
112    -256   
160    128    
704    144    
16     16     
-512   -416   
1184   32     
-1056  1936   
-176   256    
-288   96     
-512   -256   
1056   192    
656    320    
-992   416    
-304   96     
592    224    
368    -144   
-128   96     
-288   -32    
-96    320    
64     64     
160    -128   
-16    48     
-32    -224   
-80    128    
544    -624   
-832   -32    
576    -432   
-176   272    
448    0      
-608   160    
128    224    
0      -384   
368    160    
-112   -16    
-208   240    
336    16     
-464   208    
416    -592   
112    192    
48     -144   
-240   192    
64     0      
160    -368   
272    -496   
-128   -2928  
144    64     
-288   -96    
96     272    
576    -96    
-64    192    
240    -112   
-256   208    
96     -80    
208    320    
-48    -96    
64     240    
-352   80     
64     -2912  
-368   -272   
528    528    
-1104  -336   
624    176    
96     -768   
-800   -192   
336    -1024  
-208   -208   
368    128    
-48    64     
-32    112    
32     -304   
-176   -320   
-16    -144   
-48    16     
192    -128   
-16    -464   
-48    -224   
-80    -96    
80     -224   
16     -112   
-32    -1248  
-48    32     
416    -592   
-288   160    
320    208    
-176   -48    
96     -336   
656    -528   
-2496  1760   
1376   80     
-48    32     
0      32     
-912   -336   
-400   48     
128    -336   
192    -432   
320    176    
-224   16     
-48    -160   
64     -1456  
80     176    
-384   -160   
288    304    
192    0      
-176   -64    
64     48     
112    16     
-192   -48    
-160   -800   
-320   416    
1008   32     
-144   32     
-560   16     
368    -32    
176    -672   
224    -176   
-112   128    
-384   256    
240    -80    
416    -320   
-224   -160   
-208   384    
176    16     
-192   80     
-16    16     
-96    -288   
-224   112    
496    -304   
-272   144    
96     -208   
80     160    
-176   -880   
432    96     
-240   -128   
-96    80     
112    32     
-176   32     
-432   880    
2016   592    
-752   80     
-576   -480   
-64    144    
-336   -16    
-176   496    
544    0      
-352   96     
-240   -1296  
304    48     
192    80     
-16    -112   
-400   0      
592    -16    
-176   -16    
32     -80    
-128   272    
-32    16     
176    160    
16     -96    
-704   -144   
1536   -992   
-272   432    
-832   -304   
304    80     
112    80     
80     -128   
-304   -272   
-96    144    
64     -64    
192    0      
-96    16     
-32    -176   
-128   -96    
-48    -208   
224    -192   
336    -176   
-208   240    
96     -384   
160    48     
192    400    
-1200  464    
576    -592   
176    368    
-688   96     
272    -160   
192    176    
-144   -64    
-416   16     
144    -128   
0      0      
16     -32    
128    384    
-608   48     
-640   -432   
-800   112    
720    -64    
-480   -48    
496    64     
192    144    
-96    -176   
-32    128    
-96    -176   
-80    0      
-96    272    
496    0      
-240   -64    
-832   -96    
480    -256   
-896   -528   
-1072  112    
144    336    
-1232  -128   
-528   176    
736    -240   
-528   1248   
464    -160   
-224   -528   
32     -160   
-112   -48    
16     -208   
-256   -560   
-96    -320   
-192   272    
192    -208   
160    384    
192    272    
-240   192    
-272   608    
208    544    
96     48     
240    128    
224    -48    
-272   -832   
48     -1088  
-192   -368   
-192   48     
0      208    
208    400    
-96    -96    
-160   -224   
-352   -112   
176    288    
0      -16    
-16    -400   
-304   -32    
272    1056   
-304   336    
240    240    
-48    0      
-336   288    
-48    528    
-48    720    
368    -400   
-208   -304   
-192   128    
-176   48     
-32    -416   
-96    528    
-304   -832   
384    208    
-544   352    
-672   384    
128    752    
48     592    
32     -272   
-368   -1024  
240    128    
-16    480    
96     320    
-80    -208   
-144   32     
-64    96     
0      192    
-160   320    
-64    144    
16     272    
-352   256    
448    -16    
-240   192    
384    64     
-272   64     
128    32     
112    160    
16     64     
-112   224    
0      240    
256    -80    
112    -16    
-256   -224   
336    -544   
-32    592    
240    -384   
-432   416    
-112   -96    
272    -368   
304    96     
-192   64     
16     192    
-64    80     
224    -112   
-112   112    
16     192    
-64    -48    
272    160    
-176   320    
160    640    
-336   320    
0      16     
-448   -272   
-960   720    
448    -80    
224    -80    
144    -416   
-64    144    
-304   -160   
224    -544   
208    32     
112    -160   
-144   -240   
-432   -112   
224    64     
-16    -80    
-48    496    
192    -96    
-192   16     
-48    480    
48     448    
368    -848   
-544   -272   
0      832    
-160   -80    
384    -192   
-176   -208   
16     32     
32     128    
-96    304    
16     48     
-208   -48    
-1424  -704   
784    544    
864    -560   
-672   -288   
-2016  624    
1856   -224   
-1120  336    
-608   128    
368    -192   
-352   -48    
-48    400    
32     160    
-48    -64    
80     -128   
48     -144   
-16    112    
-176   -32    
48     64     
160    -112   
-48    112    
-320   -320   
1184   -432   
-1744  16     
784    32     
384    80     
-768   16     
640    416    
368    80     
16     -128   
-32    256    
-112   64     
-32    96     
80     48     
96     192    
576    128    
-320   96     
-192   32     
432    192    
368    80     
-208   -16    
-80    144    
-160   -64    
-592   672    
240    -112   
-80    -240   
240    192    
128    224    
160    512    
-864   384    
80     112    
432    -64    
80     -32    
-192   160    
-16    -16    
-368   224    
112    288    
-320   -288   
560    -1408  
256    48     
-496   -64    
-48    144    
224    160    
128    32     
-96    80     
-336   -32    
496    832    
1072   -96    
-912   16     
160    304    
-528   1456   
-272   2128   
336    672    
-1392  -384   
96     -448   
1200   128    
112    -112   
-928   272    
64     128    
176    176    
240    -80    
256    -32    
-304   -224   
-128   32     
112    112    
-112   -176   
-208   32     
352    112    
64     -224   
384    400    
-1360  48     
928    176    
-48    -160   
-96    144    
608    112    
144    16     
-464   240    
560    208    
80     -16    
-416   416    
432    -32    
-176   208    
144    -48    
-64    -1024  
432    -176   
-976   -640   
512    48     
416    352    
-352   96     
-240   48     
128    256    
-48    80     
384    352    
-288   112    
240    128    
32     96     
-80    -192   
128    -32    
-48    -272   
-112   16     
384    -80    
-48    96     
-336   -176   
496    -16    
-112   -64    
128    -176   
288    224    
-128   -96    
32     -240   
-32    -16    
48     -224   
-208   -32    
48     256    
32     -192   
-32    -160   
112    -368   
-112   816    
-240   -528   
176    144    
560    592    
224    240    
-496   -128   
64     144    
16     176    
240    -16    
-48    48     
-48    -208   
-336   336    
320    -128   
288    -352   
-256   -416   
928    896    
-2272  1072   
992    -48    
528    48     
0      -144   
-288   48     
-192   -16    
480    -224   
-16    432    
112    -48    
-256   112    
-96    240    
352    -320   
48     272    
-416   -624   
256    112    
144    304    
-32    -128   
128    -640   
16     80     
-192   -432   
512    -528   
-496   240    
16     -544   
448    112    
-304   -960   
32     96     
320    -576   
160    -192   
-368   128    
-96    144    
272    -48    
224    -48    
-224   -144   
16     0      
160    0      
-16    176    
368    -16    
-160   32     
-64    48     
96     48     
80     112    
112    64     
0      112    
-80    -224   
208    144    
-16    -112   
-144   176    
240    96     
416    -16    
-1664  -1344  
224    -1552  
1472   -1280  
-1296  -144   
528    224    
640    -192   
-1008  -384   
384    -240   
176    -144   
16     -144   
-128   112    
224    -48    
-256   -304   
144    -192   
96     -176   
0      -32    
16     -208   
384    -96    
112    -208   
-176   32     
224    0      
-448   -2160  
896    -560   
128    -1376  
-1856  -432   
880    512    
144    -688   
-160   -544   
112    96     
-320   -304   
624    -16    
-32    32     
-208   32     
-1072  128    
160    64     
-96    -128   
64     -208   
-160   -288   
-96    -320   
144    -112   
400    -416   
32     16     
464    528    
-576   80     
656    -192   
-432   240    
-784   -864   
1072   -672   
-544   320    
-640   -16    
544    -16    
96     -80    
112    272    
80     -672   
496    -160   
-32    -1680  
-288   480    
256    -416   
-96    -80    
688    304    
320    48     
-224   -192   
-192   -128   
-288   48     
288    -336   
112    -160   
160    -480   
-432   -48    
848    -144   
-336   -176   
-928   -1664  
2016   -1072  
1712   112    
-1664  752    
160    544    
480    1552   
688    1360   
256    608    
-496   -288   
-256   256    
320    -704   
352    -208   
-192   -128   
-208   160    
-304   -160   
576    -560   
192    -80    
-112   -720   
96     544    
-48    384    
128    256    
16     80     
192    -176   
-32    -112   
-48    160    
-128   352    
48     -928   
128    -1184  
48     800    
16     -224   
352    -304   
112    384    
-272   -2416  
-144   160    
384    112    
32     432    
-496   208    
160    -784   
240    192    
96     288    
-208   96     
-416   -432   
128    16     
336    -336   
-32    0      
-48    -240   
-288   48     
416    -224   
176    -656   
-416   160    
-176   32     
-400   -736   
64     -352   
112    -928   
-304   -1488  
112    -688   
-128   -208   
-176   -256   
-128   288    
80     128    
336    -16    
-64    64     
-80    16     
80     -112   
0      96     
-96    -192   
192    16     
352    560    
-176   -352   
-112   -464   
-16    320    
-112   -256   
-336   0      
16     -192   
-96    -80    
-736   96     
336    288    
-32    848    
-752   576    
-560   16     
-80    -32    
-192   64     
224    -608   
-464   112    
672    112    
-928   240    
144    144    
48     288    
-176   112    
64     320    
-320   384    
304    176    
176    368    
-448   336    
-128   256    
-32    96     
304    384    
-176   400    
-272   128    
-112   48     
128    208    
-128   848    
688    240    
-928   -672   
256    -752   
528    -944   
-416   48     
80     496    
-32    -208   
16     -256   
-16    368    
144    -272   
-320   64     
-176   112    
-96    160    
-16    176    
-320   96     
0      -16    
-96    160    
80     -80    
240    -496   
0      -48    
-128   -160   
112    160    
-352   -208   
272    160    
-112   0      
-208   -16    
96     16     
208    304    
-1840  400    
1664   -48    
800    48     
-1104  -320   
544    -64    
-160   32     
-16    48     
256    400    
-416   -32    
-144   -64    
-32    -48    
16     96     
256    64     
-64    240    
-528   -160   
144    288    
-512   -128   
-112   -48    
-128   -128   
160    0      
80     80     
256    1104   
-624   -848   
-880   192    
1200   -160   
-896   -16    
272    160    
-176   48     
0      -16    
304    -240   
-512   48     
-272   16     
192    144    
-64    -48    
176    32     
-432   -48
[truncated: 278,011 more chars]
