# Supplementary material for: A Fault Diagnosis Method for One‐Dimensional Vibration Signal Based on Multiresolution tlsDMD and Approximate Entropy
Source: Hindawi journal article supplement (doi:10.1155/2019/3262818), 2019-01-01
Supplement: f1 [file 3262818.f1.zip › 3262818.f1/gear signals/pitch errors signal/Data13.txt]

-224   272    
96     -16    
256    32     
96     32     
-256   144    
416    176    
128    192    
32     224    
144    96     
-288   32     
112    0      
752    -80    
-320   -224   
160    272    
-304   -976   
384    288    
-912   192    
560    144    
-176   16     
-320   -64    
336    48     
16     144    
304    240    
-176   208    
48     272    
48     64     
16     64     
192    -272   
-160   336    
-224   -640   
512    416    
-240   16     
0      96     
528    144    
-96    176    
-80    48     
112    -336   
-80    224    
32     -416   
-192   -80    
160    -192   
-16    224    
-128   -816   
240    -336   
1072   1632   
-2064  464    
192    32     
1504   -592   
-896   -288   
96     208    
240    112    
176    176    
-352   -16    
176    -576   
-32    240    
-48    48     
352    -80    
-176   -256   
-96    -256   
64     48     
0      192    
32     -144   
224    -1328  
-272   0      
-16    -64    
672    1136   
464    -352   
-992   -400   
336    16     
32     16     
-64    64     
320    -96    
112    -208   
-288   112    
-192   -64    
496    -208   
112    32     
-96    -1232  
80     304    
-720   272    
64     32     
160    112    
224    -336   
-240   -32    
112    -672   
448    -112   
-368   272    
240    32     
-368   -368   
368    128    
16     -176   
-80    -112   
96     48     
-304   96     
432    -624   
-1488  -224   
1472   -32    
-880   -192   
32     0      
736    -416   
-848   352    
304    -1152  
-48    -112   
272    16     
368    128    
-192   64     
16     144    
144    -64    
-384   -272   
-32    -128   
-96    -48    
-336   160    
272    128    
-80    -16    
-32    -176   
368    752    
1856   -416   
-1888  320    
816    -528   
176    16     
-160   1280   
880    400    
-416   -320   
-96    -192   
-400   -80    
272    -80    
304    112    
-160   -32    
-48    128    
-208   208    
240    -176   
176    208    
96     512    
-32    304    
0      64     
240    -192   
16     128    
32     1280   
1008   672    
-288   368    
-368   304    
112    128    
-640   -80    
-416   -512   
176    -464   
256    192    
-144   -16    
-64    208    
-144   -928   
-336   192    
-320   560    
-464   -736   
64     -320   
240    -112   
-112   16     
16     -272   
-240   160    
-80    272    
-352   80     
64     -240   
-768   -176   
368    224    
288    416    
-336   -160   
-128   -464   
1184   -1776  
688    576    
208    -48    
-1040  -96    
256    -864   
224    400    
304    1632   
-48    -256   
-528   192    
160    208    
-16    -320   
544    -128   
96     -96    
-496   -800   
-272   -416   
448    464    
400    160    
-448   304    
-96    512    
160    944    
288    -240   
-112   -368   
160    112    
-288   -112   
-192   -448   
464    -16    
16     1024   
-160   -912   
64     -784   
176    -96    
32     128    
-592   -400   
-240   -720   
224    -672   
128    336    
304    352    
96     -272   
-320   -176   
-48    128    
176    272    
-112   80     
-384   -432   
-128   272    
-80    80     
-496   256    
384    -240   
-464   816    
272    544    
-544   64     
96     32     
-416   448    
880    -592   
-288   -32    
-80    304    
-160   160    
-112   224    
208    1376   
208    208    
-368   -1728  
-64    -144   
-80    400    
0      -112   
16     80     
0      -368   
32     -256   
-64    -144   
224    64     
32     16     
32     -368   
-16    32     
208    288    
64     -96    
176    48     
-16    416    
160    1040   
160    1424   
16     -272   
-16    -512   
-400   -32    
128    784    
-560   176    
-16    -48    
304    -784   
64     -1344  
-240   -416   
464    256    
0      432    
-240   224    
48     416    
96     176    
112    0      
48     -240   
-224   512    
-240   -32    
128    192    
272    -384   
-384   208    
-464   -288   
16     112    
672    304    
-736   1472   
416    -688   
-336   128    
272    144    
-400   176    
240    -112   
-112   -224   
-48    16     
160    192    
-192   176    
-240   -112   
160    336    
-656   -160   
0      112    
288    -384   
-544   -176   
-224   -288   
384    -32    
-96    32     
-240   -64    
208    208    
64     16     
0      160    
-592   -112   
464    176    
-96    0      
48     16     
-384   32     
-688   -448   
560    272    
1408   48     
-1520  192    
272    -528   
944    64     
48     -336   
-960   -160   
720    192    
-528   -32    
-384   176    
368    64     
0      80     
64     48     
-320   192    
512    80     
-320   144    
240    -80    
-480   -16    
96     -32    
-64    96     
16     192    
-256   144    
1456   -256   
-736   160    
32     0      
-272   96     
240    48     
112    208    
-272   112    
-48    0      
-176   0      
128    80     
160    112    
-176   -32    
16     224    
176    -16    
-80    352    
-192   -208   
-16    288    
432    176    
-624   64     
384    880    
-800   -80    
-960   -544   
1008   208    
144    640    
-544   -160   
-224   -368   
544    -416   
96     160    
-80    0      
-336   128    
144    32     
848    368    
-224   416    
-656   304    
-176   96     
688    -64    
448    48     
-400   208    
-368   192    
-208   -176   
656    -64    
-288   96     
-384   160    
448    -464   
-112   368    
768    -160   
-512   160    
-1504  -1952  
2960   -2272  
272    1296   
-880   608    
208    96     
976    176    
-336   -384   
-464   400    
448    320    
400    256    
-656   144    
48     160    
288    -96    
-208   144    
-144   -80    
112    176    
-560   -16    
224    192    
448    -64    
-1104  -544   
64     160    
192    16     
-208   320    
512    16     
-720   16     
800    112    
-384   144    
-192   176    
272    96     
432    176    
-512   224    
400    272    
-304   16     
288    -160   
96     -112   
-256   80     
-128   288    
640    192    
-480   128    
-32    192    
128    144    
-96    -32    
256    32     
-208   192    
224    176    
-80    176    
-16    32     
0      -64    
176    176    
-672   272    
416    32     
144    -48    
144    224    
272    32     
-288   16     
656    96     
-288   -128   
-16    240    
272    192    
-80    48     
112    -224   
-144   208    
-48    0      
0      160    
-16    256    
160    144    
288    -48    
-304   112    
368    384    
-224   240    
-64    272    
112    128    
-32    -304   
-112   -256   
48     -32    
-16    -80    
144    256    
16     432    
-272   272    
0      192    
224    -912   
-800   -736   
1552   -1056  
-544   -48    
-1440  352    
1520   1152   
688    656    
-1056  496    
-32    160    
640    208    
48     -256   
-256   -16    
160    -576   
-80    -240   
128    -224   
128    -320   
288    368    
-272   528    
112    528    
-16    432    
-144   144    
528    208    
-976   880    
1104   -656   
-912   128    
32     -256   
-208   -112   
352    -560   
0      320    
112    496    
-16    240    
0      128    
80     -2016  
-160   320    
-32    -128   
128    16     
272    16     
-96    288    
240    -176   
-96    448    
-64    -400   
-32    32     
288    80     
-192   -128   
-48    208    
304    144    
-224   320    
96     -544   
-112   80     
176    -592   
48     240    
-1136  1424   
3248   -624   
-1056  -224   
-896   -160   
1248   448    
32     448    
-816   1712   
1184   640    
-192   864    
-176   -624   
208    80     
80     64     
-240   -176   
192    -416   
336    -16    
-192   272    
80     352    
48     -144   
0      -64    
48     224    
736    784    
-1568  -688   
-1232  -304   
2416   -1040  
-752   -912   
-144   800    
912    720    
-48    432    
-128   -304   
160    -320   
-192   -80    
-176   224    
112    512    
320    384    
-64    192    
-128   -400   
224    352    
-256   560    
512    144    
240    -352   
-432   -272   
-192   -1072  
128    -176   
-528   -768   
800    1248   
-208   1696   
-720   -464   
704    -112   
48     -816   
-256   -32    
160    -848   
576    320    
0      -96    
-416   160    
432    48     
-608   64     
288    720    
416    -1008  
-816   -1264  
192    48     
-272   -64    
272    -1584  
-144   -784   
-1712  -528   
-16    -368   
144    32     
352    -288   
-224   -176   
-144   -368   
416    -96    
128    -1536  
-2224  -752   
1568   240    
-48    976    
32     464    
112    1024   
-416   688    
-112   -128   
256    128    
16     -640   
-144   416    
-496   -928   
256    -208   
400    -912   
-480   96     
80     576    
256    272    
-128   -320   
32     -608   
-32    96     
-128   528    
0      -80    
496    384    
-16    112    
-656   -112   
848    -480   
-528   -960   
560    -784   
-80    528    
528    496    
-144   -1408  
-144   -112   
-128   -576   
32     -224   
96     -224   
48     320    
-112   -560   
-768   -768   
112    -432   
160    -672   
-992   -480   
144    160    
0      752    
320    128    
-208   -960   
80     -304   
-416   -160   
-48    -384   
480    480    
-176   -144   
-288   -832   
496    -864   
-608   -16    
-16    -1504  
992    -928   
-32    -464   
-528   48     
608    -272   
64     -448   
-304   -416   
-160   288    
80     176    
160    -64    
-64    592    
272    528    
-48    64     
128    128    
160    -160   
-288   -80    
96     560    
368    256    
-144   -80    
-160   32     
160    -272   
64     -160   
-352   -832   
208    -816   
48     -528   
32     400    
0      -32    
848    2000   
-2000  1264   
480    -464   
384    -144   
-288   192    
-240   -144   
96     -80    
-496   -736   
304    -608   
64     -256   
160    -240   
-96    192    
112    -672   
-112   304    
96     -832   
96     240    
320    240    
-336   -16    
64     -16    
48     -192   
656    624    
-1328  704    
784    -112   
-208   -256   
-544   32     
624    -272   
-272   208    
80     -544   
-272   112    
560    -112   
-304   0      
-352   -32    
80     176    
176    -96    
-32    48     
-192   -96    
-64    0      
-32    112    
256    -320   
-176   160    
0      -256   
-208   224    
352    -208   
-368   176    
304    -176   
-192   144    
-64    -192   
-96    112    
224    112    
-384   -576   
1152   1360   
1264   -560   
-1888  48     
432    -464   
960    368    
-976   -208   
-368   160    
112    -352   
-272   -16    
-304   64     
-416   32     
-48    16     
80     16     
128    32     
-64    -112   
-96    128    
64     -48    
-112   96     
96     -48    
-32    16     
-160   -160   
624    736    
816    -176   
-1152  576    
-512   320    
480    -208   
-368   -128   
-80    240    
464    0      
-880   -32    
-576   112    
-80    -16    
432    64     
-160   -112   
-224   128    
128    -224   
-16    176    
80     80     
-496   -96    
672    432    
336    -64    
-480   48     
-992   304    
400    -64    
-208   -272   
448    224    
400    -144   
-64    -496   
592    400    
-448   48     
-432   96     
272    32     
-272   272    
400    112    
32     -96    
-528   -128   
-528   48     
416    288    
256    -224   
272    -240   
-272   112    
-832   -112   
96     240    
-224   -112   
80     0      
128    -352   
96     128    
240    16     
-624   48     
-336   -1344  
256    448    
1392   -176   
-1936  80     
64     400    
608    -320   
-640   -48    
144    304    
96     -64    
-272   272    
288    48     
-336   -224   
272    32     
-240   -32    
-16    80     
80     -16    
-224   208    
-64    112    
-160   64     
240    -304   
-688   -288   
352    -112   
-368   -80    
544    16     
160    -160   
-448   208    
-224   240    
288    128    
80     -32    
-144   -128   
-352   -48    
240    80     
64     416    
-320   32     
128    128    
224    -304   
-176   -144   
-272   16     
64     160    
80     16     
-96    96     
-176   176    
208    272    
-64    368    
144    368    
0      112    
-160   16     
48     -112   
-144   -80    
208    144    
-240   240    
-96    432    
192    624    
432    -272   
-784   -976   
-48    -704   
-48    208    
368    432    
-96    224    
80     112    
80     160    
-368   288    
64     1232   
976    640    
-640   544    
-48    528    
-64    144    
352    64     
-112   144    
-128   352    
32     208    
-32    -16    
-48    64     
0      96     
32     160    
-32    208    
16     176    
-48    -416   
160    -608   
-160   -16    
-176   272    
976    1808   
-1760  880    
592    -304   
768    496    
-624   -160   
320    -112   
-176   224    
144    336    
-96    32     
96     -144   
-64    -336   
32     304    
0      -48    
64     -32    
-144   -272   
80     16     
176    208    
-240   -384   
80     112    
96     -208   
48     112    
320    -240   
-688   432    
720    -480   
-128   -464   
-64    -208   
448    -128   
-688   -880   
160    -688   
384    -96    
96     256    
-288   -528   
-32    192    
-16    400    
176    32     
-32    208    
-240   96     
-112   128    
368    96     
-96    80     
-272   -16    
-128   80     
304    -112   
416    256    
-240   16     
-512   464    
128    -16    
288    -48    
32     -16    
-272   224    
-592   -944   
-960   528    
1856   64     
-1616  288    
64     272    
528    -80    
-480   -256   
224    -544   
368    1440   
-112   32     
-16    -304   
48     48     
-160   192    
128    64     
160    64     
32     -160   
-160   32     
256    -128   
256    96     
-256   192    
128    944    
336    -688   
-1200  496    
1184   -80    
-720   672    
352    32     
16     688    
352    -592   
-544   -1328  
-208   -1072  
240    -128   
-160   224    
208    512    
16     640    
-336   256    
864    -144   
-416   -64    
-144   336    
80     736    
48     816    
-48    -208   
80     160    
16     -1200  
480    992    
-928   848    
-112   -64    
672    -960   
-272   -336   
32     -240   
224    48     
-496   -544   
0      -64    
480    -64    
128    336    
-304   -320   
-256   -976   
192    304    
-16    288    
-240   816    
-208   256    
496    160    
-128   48     
176    768    
-576   608    
16     16     
784    0      
64     160    
-16    -480   
-496   0      
80     224    
-896   -1984  
-448   -176   
896    -304   
-480   -144   
64     -1360  
32     -16    
-384   -272   
160    -256   
368    112    
160    448    
-144   -720   
-80    128    
128    560    
160    -208   
80     0      
-208   -272   
176    320    
-112   -240   
112    -224   
-176   32     
-48    368    
144    -288   
544    -160   
-368   -896   
-1136  64     
736    -656   
-368   224    
416    -128   
-496   -384   
288    0      
-16    0      
32     256    
-128   -448   
48     0      
256    -368   
64     96     
-64    -416   
-112   48     
128    256    
-16    16     
-208   256    
144    144    
-288   -496   
-48    -640   
96     -96    
288    192    
-208   416    
192    80     
112    416    
-192   32     
80     48     
528    432    
-896   928    
-96    240    
608    0      
-32    -816   
-608   -368   
0      448    
592    -256   
240    176    
-160   -80    
256    432    
-192   -96    
-80    112    
336    -112   
-128   -64    
-368   -1200  
480    112    
-16    -256   
-112   240    
-128   288    
144    -512   
-304   -1520  
320    0      
-16    -128   
16     96     
256    224    
-320   -208   
160    112    
224    -112   
848    -1136  
-3232  1584   
1520   -256   
272    128    
224    -160   
-336   352    
-672   -32    
336    288    
-384   -208   
304    -128   
-208   160    
-208   -496   
224    -112   
256    16     
-144   240    
64     -384   
-368   336    
352    -176   
64     48     
160    80     
704    352    
-1936  112    
656    -80    
800    -112   
-976   -416   
480    288    
-416   -304   
80     -256   
-16    -32    
432    -240   
-96    0      
-416   16     
192    16     
288    32     
-288   256    
304    48     
-96    48     
-400   -256   
288    -32    
192    -112   
-64    -96    
96     48     
-96    96     
224    -16    
0      80     
-224   32     
304    -96    
-256   0      
304    32     
320    752    
-240   896    
496    528    
160    -192   
-544   -496   
1152   -304   
-128   -80    
-848   656    
736    144    
80     -736   
-48    -32    
-208   -160   
128    96     
80     16     
336    80     
-464   -128   
224    0      
-256   48     
64     -64    
-48    -32    
160    -96    
256    464    
192    -816   
-1088  192    
1200   -608   
-1200  112    
416    -1088  
384    64     
-144   -96    
-368   176    
48     -64    
80     0      
-176   16     
112    32     
-208   64     
192    -32    
-320   16     
112    -240   
304    -224   
-176   -176   
144    176    
-16    -144   
-256   -464   
-368   320    
416    -352   
-1248  176    
448    -160   
528    -192   
720    -96    
-1168  -224   
32     -64    
-112   176    
-240   -16    
192    96     
240    208    
-304   96     
-160   -464   
16     144    
-384   -288   
272    -48    
-160   240    
-432   -80    
-208   -32    
128    -224   
-304   -128   
64     240    
-144   176    
352    -64    
256    160    
-432   -320   
1216   4624   
560    2128   
-800   464    
1392   -800   
-400   -128   
-240   224    
464    112    
160    -112   
320    16     
-784   -96    
352    256    
-576   -112   
160    -16    
192    0      
-272   -144   
-48    144    
-176   -16    
-1232  -48    
-448   64     
-1344  1104   
976    1904   
-240   832    
0      -144   
144    -128   
-496   -80    
496    512    
336    -80    
-976   -160   
112    176    
208    -112   
64     -208   
-640   -448   
-48    -144   
720    -240   
-848   -240   
-96    -80    
-432   64     
96     -256   
48     -128   
0      -16    
-176   -144   
0      -80    
240    -272   
-384   -176   
224    -480   
-16    -128   
112    -48    
-288   -256   
-432   -256   
176    -656   
384    -448   
-208   -16    
-96    -272   
-1120  336    
416    112    
368    -192   
-736   -32    
-32    -672   
-96    -736   
32     -960   
16     976    
0      480    
-64    -304   
-48    -16    
-96    -144   
-48    -160   
-80    -48    
-400   -368   
-144   -48    
-32    -96    
32     96     
32     128    
-160   -128   
0      176    
48     272    
64     96     
-80    -32    
16     864    
224    -112   
-432   32     
-224   144    
784    656    
-1024  1008   
496    -208   
336    176    
-400   -192   
-48    48     
-112   -240   
-128   32     
-32    -272   
224    -64    
0      128    
-256   272    
16     0      
256    144    
-224   -64    
-288   288    
144    16     
-128   32     
224    160    
-160   48     
-256   -512   
-48    208    
-144   96     
400    -160   
-144   176    
32     -32    
240    144    
-672   736    
112    672    
432    -48    
-160   -144   
-544   192    
16     -64    
240    -32    
-64    128    
0      32     
-864   -32    
112    160    
-48    80     
32     -16    
-304   144    
-48    128    
96     64     
-64    -48    
352    -320   
-240   0      
288    96     
-432   -272   
-208   720    
-144   320    
480    240    
2272   -1136  
-2064  -192   
544    -896   
96     -432   
-272   -608   
304    -496   
-1232  -1456  
-192   -1344  
64     496    
256    64     
0      -80    
-304   -32    
80     -192   
208    80     
-16    160    
-272   0      
-144   400    
128    -16    
48     288    
-368   -672   
-16    464    
1648   -464   
-1312  480    
832    1872   
1248   1376   
-160   608    
-656   1104   
1072   992    
-240   496    
-48    304    
192    -80    
-80    -384   
-400   -224   
288    32     
-256   112    
352    512    
-208   432    
-320   96     
416    -32    
-48    0      
-32    96     
-352   176    
688    976    
-352   -32    
-624   -272   
352    -1168  
-656   112    
0      32     
624    -224   
128    80     
128    416    
-608   336    
80     352    
64     -128   
-672   -1232  
240    -544   
-320   -352   
-272   256    
432    -64    
-208   -16    
-144   -32    
224    -16    
80     208    
144    176    
-384   336    
-176   32     
-192   -144   
928    160    
-624   -816   
608    -2640  
-112   832    
320    384    
-784   -64    
-560   64     
928    -544   
-224   592    
-544   -448   
144    560    
144    -400   
-32    432    
256    -96    
-560   128    
-192   -128   
576    32     
-432   80     
80     16     
-256   432    
704    400    
-176   1216   
208    768    
-192   -208   
-112   176    
640    256    
-128   -176   
64     48     
160    -144   
48     688    
400    528    
-240   432    
432    64     
-80    544    
144    -80    
-176   32     
-48    -208   
368    96     
352    160    
-224   240    
32     160    
256    160    
-192   -32    
192    112    
144    -64    
-544   -16    
160    64     
416    -16    
-96    128    
-416   -64    
224    -96    
128    16     
48     -1168  
-336   -144   
432    -160   
240    144    
-32    -192   
144    -224   
-80    272    
32     576    
-96    96     
-16    96     
-96    16     
112    64     
-304   -160   
144    -240   
192    160    
16     -1504  
-416   -64    
208    480    
96     -64    
128    112    
-80    112    
96     160    
-64    144    
16     -48    
224    112    
32     240    
-176   144    
96     112    
80     -80    
80     144    
-752   1472   
3024   -704   
-1408  128    
-128   1296   
1712   -96    
-832   304    
-32    -144   
-32    464    
-32    208    
80     16     
-16    192    
-32    -432   
-160   48     
160    272    
528    -304   
-656   -720   
352    160    
80     -1712  
-16    112    
-16    -464   
-256   -1232  
-176   432    
1072   704    
-1328  48     
192    176    
640    -128   
-576   -112   
-144   -112   
176    48     
368    -80    
-432   -96    
240    -48    
16     -1424  
-16    16     
352    -320   
-416   -160   
240    -80    
-16    -48    
32     192    
-128   64     
96     144    
144    -64    
-144   144    
240    -128   
-576   -32    
624    -576   
-192   48     
-64    -128   
240    96     
448    -1360  
-2112  -896   
1472   -272   
-528   96     
400    288    
-416   -304   
48     0      
-80    -608   
-208   -32    
576    -1184  
112    96     
-288   -288   
-32    192    
144    128    
-64    224    
-32    -448   
64     32     
-128   144    
32     192    
-16    16     
-80    96     
320    672    
368    -544   
-1456  80     
1136   -672   
-256   256    
-272   96     
384    16     
-384   -272   
848    -208   
-144   160    
-320   80     
112    96     
144    -176   
32     -96    
-64    176    
-16    -784   
96     176    
80     112    
-496   -48    
112    -144   
176    64     
-192   112    
480    -32    
-352   -768   
-448   144    
448    -192   
608    192    
-304   -224   
-128   -224   
-1360  48     
-176   -432   
-80    -176   
304    -144   
-48    -96    
-432   -1200  
48     -176   
640    48     
-208   -320   
-448   -256   
768    80     
-144   -176   
-208   128    
16     -256   
160    -16    
-16    -96    
0      -112   
192    0      
144    80     
224    352    
-1328  -96    
2192   -496   
-32    -672   
-1632  48     
256    80     
368    304    
112    -144   
32     48     
-240   -160   
-192   96     
512    -48    
176    16     
-128   -224   
-192   -16    
256    -128   
496    80     
-160   -48    
-80    -288   
144    -80    
-160   1232   
464    1104   
-80    912    
64     128    
128    -64    
-448   -80    
336    128    
-224   128    
-432   64     
336    592    
464    848    
-224   -272   
-368   -224   
256    16     
80     64     
128    -1472  
-400   -16    
416    144    
-384   464    
48     1136   
224    576    
-464   112    
208    -368   
64     48     
96     -160   
-336   -496   
96     48     
448    976    
-288   976    
688    -848   
-464   -992   
-32    560    
-112   -368   
736    -656   
-832   -96    
560    -1120  
-272   -464   
-320   -560   
304    16     
-96    -304   
-880   240    
288    -256   
-32    64     
-16    -320   
192    -96    
-192   -464   
-48    16     
-272   -112   
-144   48     
-112   112    
-32    16     
208    -48    
-144   32     
-48    -64    
-128   -80    
-128   -32    
176    -192   
-128   80     
240    -48    
-352   384    
272    -544   
-160   192    
-352   -256   
944    -512   
-720   336    
768    -272   
-576   208    
32     176    
0      -640   
272    -288   
-416   304    
128    112    
-288   32     
240    -224   
224    64     
288    -304   
-688   32     
512    -176   
288    -176   
-192   0      
32     160    
-224   16     
272    -448   
-1024  64     
672    192    
-304   240    
160    -112   
-240   -32    
-384   80     
-272   1184   
208    -192   
512    -288   
-208   208    
-656   240    
320    -176   
320    -448   
-272   112    
96     272    
96     864    
-64    272    
16     48     
-448   -432   
-192   48     
64     -208   
-80    -224   
16     -32    
0      128    
-48    -48    
-288   32     
224    -128   
-272   256    
-160   544    
16     864    
1840   224    
-720   -96    
-240   624    
160    256    
160    608    
528    672    
-1104  -384   
-496   -1936  
352    -112   
48     720    
-80    240    
0      -320   
-464   0      
368    144    
-224   176    
-224   -336   
-208   -336   
336    128    
80     192    
240    -272   
-1904  848    
1472   64     
-656   448    
-592   48     
144    -352   
320    208    
-96    352    
-480   -224   
400    -192   
-304   80     
-336   144    
-672   192    
496    128    
-400   -160   
-96    96     
32     -400   
272    -16    
160    192    
-16    0      
-112   80     
-352   -320   
-352   -320   
80     176    
736    800    
96     240    
32     -160   
-160   160    
-96    -288   
576    -176   
48     144    
-16    32     
0      288    
-64    224    
384    48     
-592   128    
608    288    
368    288    
-176   -96    
336    192    
32     112    
-576   208    
112    352    
-352   240    
160    -64    
-576   240    
-368   80     
352    32     
224    -320   
-1376  448    
1168   -1456  
-240   736    
928    -80    
-896   48     
-624   368    
224    -272   
656    224    
-512   -64    
-432   48     
-1152  -128   
256    96     
80     -112   
-240   192    
-112   -128   
112    224    
272    -32    
-48    112    
-112   -96    
16     1056   
448    48     
-704   240    
160    0      
-96    -144   
384    336    
-640   80     
-32    208    
64     240    
-16    -224   
208    -192   
-240   48     
256    -16    
-128   144    
-224   -240   
-224   -192   
144    64     
128    -48    
-464   48     
-496   -192   
560    288    
-224   0      
32     0      
144    32     
-368   32     
416    112    
-144   80     
96     -80    
-576   -400   
128    -240   
272    -304   
-608   -48    
256    -160   
368    288    
288    -48    
-512   224    
848    160    
-496   336    
112    512    
832    208    
-192   112    
64     208    
-256   64     
176    48     
80     -144   
192    -80    
-32    112    
32     272    
-80    208    
80     -304   
240    160    
-48    96     
-368   48     
160    96     
112    -48    
144    224    
-192   48     
-16    192    
128    64     
-96    160    
128    -112   
-160   80     
320    2400   
2656   -240   
-1856  320    
176    16     
-16    -256   
592    160    
-64    -48    
-96    -464   
-64    208    
0      336    
256    -96    
-208   16     
80     -32    
-112   32     
416    -32    
-544   304    
224    16     
112    32     
-208   160    
16     32     
-288   -1008  
640    64     
80     256    
-864   176    
816    224    
-16    0      
-416   80     
48     -192   
16     224    
432    176    
0      112    
-400   -48    
80     96     
432    320    
-224   288    
-16    256    
144    48     
-432   128    
784    32     
-624   128    
176    48     
-16    176    
64     16     
112    224    
-96    160    
-368   400    
480    -720   
-48    80     
-144   112    
752    1536   
-1056  1008   
-656   624    
1232   -96    
-384   -128   
-448   -64    
720    176    
-432   -112   
-112   336    
560    -240   
-96    192    
-272   -96    
-48    -128   
448    192    
-208   -1456  
-144   304    
208    -16    
-192   128    
176    192    
-48    320    
-48    80     
448    1136   
-832   -768   
-624   320    
896    368    
48     -32    
-32    224    
-176   352    
0      -48    
208    -480   
-208   48     
128    0      
-144   144    
-16    96     
256    -80    
112    112    
-240   96     
-128   -528   
-112   368    
224    0      
-112   -128   
-64    80     
640    448    
240    -208   
-416   -368   
304    592    
208    -960   
-256   48     
192    160    
0      32     
-64    -16    
-48    64     
128    112    
32     144    
-144   0      
0      -560   
384    96     
464    -368   
-400   32     
784    96     
-640   272    
-32    -704   
96     112    
64     -192   
80     64     
-176   32     
448    -224   
-128   96     
176    -16    
400    528    
-768   -720   
1600   -656   
80     -352   
-1472  208    
208    224    
1072   192    
-528   -400   
192    -384   
368    688    
320    464    
-640   80     
272    224    
16     288    
16     400    
192    256    
224    96     
-624   288    
256    -672   
496    -160   
-304   -768   
-128   -528   
16     -1184  
256    -144   
-48    -368   
-192   -384   
208    384    
128    592    
96     624    
144    592    
-240   -48    
352    -496   
48     112    
-48    32     
176    128    
-144   -336   
96     192    
144    704    
320    320    
-464   -1120  
64     -448   
160    -224   
144    0      
240    96     
-304   -880   
128    -1152  
192    -336   
16     400    
64     -464   
-256   272    
64     -32    
-16    16     
384    928    
-192   -688   
-384   -288   
160    -1312  
-256   -80    
-256   192    
160    592    
336    1216   
-144   -240   
96     -848   
16     -3040  
96     336    
0      -32    
-144   -176   
-176   -16    
304    -256   
-64    -16    
-448   -368   
112    -192   
-256   128    
400    -192   
48     -176   
-1520  -256   
16     -384   
256    -64    
-64    96     
496    -16    
-640   -576   
-64    48     
528    64     
-64    64     
-48    -240   
240    32     
368    48     
-160   -160   
-80    96     
208    -80    
-288   64     
512    -288   
-16    -48    
-240   -160   
-128   -144   
352    -864   
-112   -96    
-128   -1344  
-32    -176   
-64    -304   
-32    -304   
112    -160   
48     224    
-448   -336   
368    -64    
-272   240    
112    432    
-192   352    
160    -320   
416    -32    
-624   -368   
112    208    
560    -16    
-176   288    
-352   176    
112    80     
-208   -192   
80     -368   
224    208    
368    -128   
-608   -496   
32     -16    
-880   1072   
480    -256   
-112   -368   
-352   416    
160    64     
528    208    
-240   336    
-320   -1360  
32     -96    
80     -48    
-160   -336   
704    96     
1744   -224   
-1344  -112   
-1328  32     
2176   16     
-1056  -144   
-2032  160    
1600   -112   
-400   -144   
-464   -352   
304    64     
96     -208   
-48    240    
96     336    
80     304    
-128   -80    
80     48     
-112   64     
224    96     
0      -48    
624    864    
-1936  -224   
-16    -336   
1104   -16    
-816   -288   
272    64     
400    -944   
-576   368    
224    32     
64     -144   
-304   32     
-144   80     
-48    -80    
496    128    
-224   -64    
-272   -64    
32     -224   
416    -64    
-64    144    
80     -48    
-64    144    
-512   -672   
176    -64    
-288   336    
-160   -464   
64     -544   
400    -48    
-112   -176   
-416   48     
224    128    
32     0      
-48    -16    
-16    -336   
-224   256    
-176   -288   
-32    112    
176    -480   
240    -336   
-32    416    
112    32     
-464   -64    
96     48     
48     -64    
-96    -128   
-464   -352   
1008   -176   
-336   -96    
-384   -64    
256    -400   
-528   1008   
1440   3408   
-272   -304   
-1008  -880   
-64    -256   
976    16     
-64    -112   
-560   -16    
-48    144    
-352   -176   
384    80     
336    -48    
-384   48     
-96    -400   
96     224    
-96    -240   
-48    304    
304    32     
-208   48     
144    -256   
-1392  -48    
1136   -96    
-1040  112    
496    -32    
-480   48     
-96    96     
-416   160    
704    384    
-176   -112   
-352   464    
480    -176   
-304   224    
144    -160   
-208   -128   
352    -288   
-1152  -368   
544    0      
224    272    
-432   32     
-384   -64    
-16    128    
-80    -272   
256    240    
-304   -96    
208    0      
96     -144   
64     -80    
-176   -16    
80     -48    
-96    16     
352    224    
-160   96     
-336   -944   
-608   -32    
448    -64    
-352   512    
112    240    
-112   -208   
32     -320   
96     -80    
160    -160   
-32    32     
-288   -48    
288    32     
368    304    
-224   64     
-544   -256   
304    -992   
-64    320    
-80    624    
480    -272   
-704   -16    
96     352    
288    -96    
32     -80    
-272   16     
160    208    
-368   240    
160    -496   
-112   -192   
-144   320    
960    2784   
-1616  -1152  
-768   272    
1536   -672   
-576   -80    
-528   32     
-96    112    
768    336    
-32    128    
-320   -224   
-64    208    
-48    112    
320    0      
-128   0      
-208   -944   
16     496    
240    304    
-240   -256   
16     -736   
128    144    
-368   -272   
864    48     
-1040  112    
-384   -32    
624    128    
-272   64     
-16    80     
208    0      
160    -160   
-416   352    
-48    112    
144    288    
192    -80    
-336   -128   
32     -16    
80     48     
-64    128    
16     -32    
-160   32     
-176   32     
80     112    
48     64     
48     176    
-32    112    
-160   -80    
112    128    
-16    80     
-208   128    
112    -16    
368    48     
-1488  -1792  
-512   -144   
1696   -576   
-1344  -112   
240    224    
1072   32     
-1232  -320   
224    -272   
224    -192   
-80    112    
-144   112    
256    64     
-368   -16    
144    -128   
80     240    
-48    -144   
-96    48     
336    48     
128    -96    
-160   96     
160    160    
-320   -784   
256    80     
720    -416   
-2016  -192   
544    432    
304    -688   
-416   0      
96     -16    
-400   80     
560    -128   
128    144    
-320   112    
112    256    
240    224    
-96    0      
-80    96     
-112   -288   
-240   48     
160    48     
368    -128   
16     -48    
240    880    
-368   -368   
416    352    
-208   112    
-928   -1296  
848    -128   
256    432    
-640   64     
416    64     
112    112    
-32    272    
80     -64    
512    -64    
144    16     
-640   144    
448    -544   
0      160    
480    416    
320    -16    
-64    64     
-144   176    
48     96     
288    -48    
16     560    
384    384    
-176   96     
208    400    
-112   240    
-704   -544   
1520   -64    
1296   720    
-1632  160    
-160   -2448  
384    -416   
912    -240   
-464   1088   
-224   656    
208    176    
320    160    
80     176    
-576   -144   
48     160    
-48    -80    
288    144    
16     -288   
48     -96    
-80    -464   
-288   -944   
144    -32    
160    336    
192    -16    
-208   -256   
256    -272   
-272   -208   
0      672    
288    1424   
-96    -784   
-160   112    
192    576    
32     -368   
192    272    
-224   -112   
288    -80    
0      -320   
-352   -880   
400    672    
64     16     
48     -720   
-240   -192   
368    320    
208    400    
-48    0      
0      448    
-224   112    
304    -48    
160    160    
0      864    
80     -48    
-192   176    
688    -928   
-992   464    
208    640    
304    1728   
0      1088   
304    496    
32     560    
352    -672   
-64    -80    
-144   -96    
16     160    
80     32     
0      304    
112    -240   
-80    -96    
-144   -640   
416    -496   
-192   144    
-352   1056   
-192   -224   
176    48     
-96    128    
256    144    
-272   608    
16     320    
176    304    
-208   16     
-448   32     
96     -320   
-32    128    
800    -720   
-880   -80    
-416   640    
1056   480    
-432   736    
-144   -64    
288    -768   
-80    -80    
128    -32    
96     368    
64     -16    
32     -304   
-208   16     
-80    -144   
0      176    
304    -544   
128    112    
-224   -176   
32     352    
240    -928   
-368   0      
608    -624   
-192   -448   
-368   -720   
512    -832   
32     224    
64     208    
-80    -176   
-32    -64    
272    64     
112    -384   
-224   272    
-80    -256   
320    64     
80     -48    
-272   96     
0      -144   
-64    272    
128    -192   
272    -336   
112    -16    
-48    -256   
48     208    
-208   -528   
224    304    
112    -128   
-96    224    
224    -32    
592    384    
-1648  640    
1872   784    
1552   64     
-1632  448    
1072   -48    
-352   -80    
-208   -48    
720    80     
-480   -1040  
-96    -272   
-80    -16    
192    -48    
320    64     
-112   128    
-416   -416   
240    272    
160    -1296  
-96    -144   
-32    -352   
64     -432   
-320   16     
448    912    
-1040  -864   
-416   -96    
1008   -240   
-752   -784   
352    96     
-144   128    
112    -80    
448    -368   
-560   -16    
48     -48    
160    112    
-48    -352   
240    -160   
-1088  -32    
784    -400   
-144   256    
128    528    
544    176    
-96    -464   
64     -16    
-288   -176   
208    -224   
160    16     
80     -160   
-64    64     
-144   -160   
624    -192   
128    -768   
-480   -192   
-64    48     
-96    256    
160    -112   
352    -176   
-256   -304   
-528   304    
400    -1296  
16     240    
384    144    
-144   80     
-368   -256   
192    48     
288    -16    
-112   -176   
-64    336    
-176   -144   
-336   16     
896    -144   
-64    -400   
-720   -240   
2576   -2960  
256    784    
-112   880    
-288   -176   
544    656    
112    -208   
-176   -80    
224    -112   
-96    -64    
0      224    
-176   64     
-432   -368   
16     -32    
176    -96    
64     112    
-416   -64    
112    -112   
592    32     
-480   -3056  
-176   112    
176    -32    
-240   48     
816    -128   
96     -304   
-672   -224   
304    96     
48     -400   
32     -224   
-368   -304   
16     64     
112    -160   
-64    -192   
64     160    
16     -784   
336    160    
0      0      
304    -176   
-240   48     
-496   -16    
304    16     
80     32     
-64    -48    
-112   176    
-176   128    
-48    16     
240    32     
-16    -128   
-48    336    
416    32     
-384   112    
320    48     
0      96     
672    -128   
-496   336    
544    -224   
-96    128    
-32    96     
-736   144    
160    160    
16     -32    
224    224    
-32    -16    
-160   -16    
128    -608   
-96    32     
160    272    
-176   -48    
176    656    
-368   624    
112    -128   
224    -384   
-160   176    
-336   16     
112    80     
208    -176   
-32    464    
384    -144   
-336   -288   
-1360  -368   
-400   80     
-1088  -48    
992    -1024  
-1344  -144   
256    -480   
352    720    
-192   -48    
-464   -944   
112    -592   
208    368    
-208   304    
-144   80     
-432   -272   
-64    352    
384    32     
-720   784    
176    224    
-416   160    
-96    -16    
-352   -64    
-112   160    
384    864    
-960   -80    
208    304    
1056   -304   
-944   784    
656    -16    
-432   64     
80     368    
208    -112   
224    0      
-432   192    
-192   1008   
256    -48    
-480   -16    
-96    -160   
-448   -256   
304    -64    
368    112    
-320   144    
-208   -64    
-32    144    
-48    0      
32     160    
-48    32     
0      16     
96     -48    
208    0      
-304   144    
-144   -160   
416    352    
-416   912    
1008   208    
-1056  -784   
1008   240    
64     -448   
-816   240    
304    -80    
256    -304   
-256   -560   
-320   -400   
112    -128   
208    32     
-400   -16    
320    16     
224    -128   
-480   -48    
176    144    
-80    -160   
-64    16     
112    -176   
-320   -432   
1168   672    
-1696  -384   
352    -176   
1216   800    
-1232  -96    
-704   -1136  
480    -1008  
352    -320   
-800   128    
-80    32     
176    0      
-128   -128   
64     -144   
-192   -512   
176    48     
-112   -208   
624    -320   
32     -112   
-352   -112   
224    -288   
-160   -32    
208    -320   
-144   -208   
416    -672   
-880   -1328  
-48    -592   
144    496    
0      288    
-112   80     
208    112    
-320   -144   
256    -512   
-640   -944   
-288   -112   
352    400    
-96    -368   
384    -368   
192    -336   
-544   -64    
-16    240    
-112   320    
-144   -336   
176    32     
-496   96     
-384   544    
-432   480    
-112   -32    
32     -48    
160    -80    
1248   2304   
-2112  1120   
800    160    
1488   -224   
-1120  -336   
-752   -1152  
-16    -1456  
480    -352   
384    800    
-576   -176   
-112   -432   
480    576    
112    144    
-192   80     
-16    176    
-224   -96    
288    96     
176    192    
-160   416    
176    416    
-240   16     
80     -208   
256    160    
304    64     
-560   160    
-96    -256   
352    -672   
-16    -320   
96     -304   
-16    608    
-16    448    
224    224    
32     0      
-272   -144   
176    16     
176    752    
-240   1056   
176    384    
224    1024   
-48    240    
32     -672   
-240   -160   
96     160    
-80    16     
352    -208   
-112   -272   
-368   160    
224    720    
208    -1120  
-128   -32    
-656   -64    
-128   368    
1072   -1136  
-512   -576   
-720   -832   
560    -288   
-160   -448   
240    -528   
-96    576    
-48    -160   
-672   -1312  
240    -224   
368    288    
-384   112    
80     -224   
96     352    
112    592    
-48    480    
32     608    
144    -320   
-224   -176   
320    176    
-240   16     
-48    224    
592    416    
-256   32     
16     160    
240    -16    
-896   192    
-112   336    
-224   -912   
1264   -880   
-640   528    
0      -864   
16     592    
96     608    
112    -528   
208    0      
-160   336    
-368   -432   
240    -560   
192    80     
0      304    
-64    464    
-112   576    
272    128    
-368   96     
-48    128    
64     64     
176    160    
-32    192    
-384   -1040  
576    -208   
-32    576    
-288   -256   
560    208    
-512   768    
192    464    
-192   160    
32     496    
-144   -48    
48     -528   
208    -16    
-144   -144   
192    192    
192    304    
-304   112    
-112   -144   
64     144    
288    -16    
-240   112    
0      224    
112    96     
-224   -32    
656    64     
-624   -16    
48     -64    
0      144    
224    -528   
160    -240   
112    -880   
-2080  -256   
1296   144    
368    0      
-576   16     
-352   272    
192    -256   
-32    528    
-416   -288   
352    336    
160    16     
-384   -16    
256    0      
-128   32     
512    96     
-176   -48    
-112   -64    
400    224    
48     16     
-48    48     
96     112    
208    624    
-1328  112    
512    112    
-176   144    
-160   0      
144    224    
224    -16    
128    240    
-224   144    
112    -1264  
368    -16    
64     48     
-80    64     
-96    192    
64     80     
16     80     
-16    160    
-176   -352   
240    -576   
80     240    
144    -368   
192    272    
144    -416   
-736   -112   
416    -368   
608    160    
-48    224    
336    224    
-144   -32    
16     -112   
544    -112   
-480   -80    
-96    336    
-64    240    
-16    32     
48     -208   
432    80     
-192   176    
-272   176    
-32    -1024  
224    64     
-272   -128   
-32    -16    
224    112    
352    96     
-688   272    
-144   -384   
-320   176    
80     -688   
2672   3072   
-2528  1168   
656    608    
144    -880   
-544   176    
992    -160   
-640   -272   
-96    -240   
192    208    
-336   16     
528    128    
128    16     
-464   -736   
-16    240    
560    -192   
0      176    
-64    -96    
-64    160    
272    -304   
-16    1280   
720    240    
-640   432    
192    -64    
32     64     
-48    128    
208    -2432  
-112   96     
-112   -304   
128    112    
64     -112   
64     -80    
-128   -208   
160    -64    
-192   -96    
240    -192   
-336   -432   
352    -656   
-224   256    
96     -224   
336    304    
-128   -240   
112    -368   
-384   -32    
-224   -160   
64     -32    
272    -208   
-320   -96    
96     -1616  
224    -80    
-96    288    
240    32     
-144   64     
48     -336   
-240   96     
880    -192   
-464   -112   
-320   -48    
-688   992    
528    624    
-48    -80    
64     -176   
-144   16     
64     -448   
192    -48    
32     -2304  
-144   32     
240    80     
-144   16     
80     -112   
96     192    
-128   -128   
-192   -48    
-176   176    
-224   336    
-64    160    
176    -176   
336    -224   
-64    128    
-224   96     
128    -848   
-64    0      
-592   -1680  
784    -976   
-608   240    
-592   224    
800    -80    
96     -192   
-128   96     
-304   -880   
-352   -704   
352    -480   
-48    272    
-48    -128   
-256   -16    
256    -672   
-80    16     
192    192    
-128   208    
32     0      
-32    -80    
48     -144   
368    -208   
-464   944    
272    -560   
-752   -16    
464    304    
-1472  -640   
-48    -320   
176    176    
48     -304   
-112   -16    
-80    -1888  
16     224    
0      -160   
272    -240   
-192   112    
192    240    
-208   48     
-240   -608   
-64    160    
80     224    
-96    -112   
32     80     
-80    352    
352    -320   
-48    -48    
-256   -368   
-16    240    
336    -48    
592    224    
-768   848    
-1152  1280   
3056   -848   
-1216  96     
-768   -448   
1200   -192   
-224   320    
128    48     
32     272    
-80    -256   
48     192    
96     160    
128    192    
-512   64     
224    224    
0      -272   
48     0      
0      304    
-80    224    
-32    -224   
80     -112   
112    1104   
-64    -1136  
-1696  656    
1568   304    
368    -624   
-368   -912   
-320   -1280  
320    -992   
-96    1520   
336    2112   
32     256    
-640   -416   
400    -32    
224    448    
-336   48     
-448   352    
384    -112   
160    384    
-480   -288   
-128   -80    
-80    256    
-208   -80    
32     0      
-352   -288   
1008   -176   
-128   192    
-736   -336   
480    -1248  
-672   -192   
96     -192   
160    112    
-208   -480   
640    -32    
-608   64     
384    992    
-288   32     
-352   -384   
544    -560   
-592   336    
672    176    
-1200  -384   
-224   144    
352    448    
-320   400    
240    -256   
-480   592    
-240   -96    
-32    96     
0      -304   
144    96     
1264   2080   
-2000  928    
96     496    
1184   96     
-64    1344   
-160   1264   
-272   -128   
272    -416   
256    -128   
-32    -400   
0      384    
-144   -32    
192    -288   
-160   -384   
-272   208    
64     368    
16     112    
-48    -144   
-48    -224   
-240   -432   
-64    -240   
16     -96    
-352   192    
928    -96    
-848   1216   
720    512    
-112   272    
-112   32     
144    -368   
-112   -1072  
-592   -960   
112    -80    
352    592    
-352   416    
-144   256    
144    144    
-224   96     
-96    -16    
96     160    
-80    -160   
0      160    
128    224    
-400   464    
208    432    
64     496    
0      528    
-256   192    
-128   160    
496    640    
32     592    
-176   128    
-368   -480   
160    -560   
368    -320   
64     752    
-640   688    
464    960    
16     736    
-48    512    
32     -928   
-720   -496   
160    -192   
48     -208   
240    -176   
96     160    
-336   416    
48     -416   
-112   -352   
-96    -960   
-624   -656   
112    -96    
-96    48     
112    240    
-48    128    
320    496    
192    448    
-576   672    
656    1344   
-400   1248   
-112   512    
960    2224   
-1312  80     
-16    -96    
1216   240    
-512   -336   
-272   560    
-256   0      
496    320    
-256   16     
-80    96     
-16    16     
-160   320    
112    224    
192    -80    
-544   464    
240    48     
-48    400    
-176   96     
-32    -64    
144    -48    
-208   272    
-576   -736   
1056   16     
272    -128   
-1568  144    
1392   112    
-48    160    
-32    112    
-384   208    
384    -160   
-128   -192   
64     144    
0      -80    
96     208    
-224   -16    
144    112    
160    192    
48     0      
-32    128    
48     0      
-64    112    
-96    16     
320    160    
32     16     
-144   32     
-192   80     
48     112    
368    16     
-288   80     
-144   -144   
-736   128    
672    1120   
-272   256    
-352   16     
880    384    
-1104  -144   
960    -288   
-336   -48    
-688   -320   
336    176    
240    32     
48     112    
-176   32     
112    224    
-624   -80    
608    240    
-96    -64    
-160   32     
112    -32    
-48    -16    
224    128    
-192   16     
-1376  624    
1584   432    
-1216  112    
-224   32     
1024   272    
-976   -224   
256    -160   
48     -96    
-96    112    
128    48     
16     112    
-32    16     
32     0      
-64    112    
16     -112   
224    592    
-48    336    
288    128    
-304   64     
-112   176    
336    -352   
-272   -1552  
384    -16    
-176   656    
128    592    
256    -64    
336    304    
384    224    
-528   48     
112    -16    
176    -192   
32     -16    
-272   144    
512    176    
-320   288    
144    640    
-208   -176   
-144   272    
128    112    
304    -32    
-48    0      
96     208    
48     16     
192    80     
48     48     
-320   32     
-48    80     
32     -336   
736    -4912  
-2624  -1760  
976    240    
688    -400   
0      128    
-176   560    
-160   -32    
80     288    
-224   -112   
400    176    
-96    32     
-448   160    
512    176    
-48    -80    
-272   -16    
144    16     
176    96     
112    128    
80     -64    
48     -624   
-80    -608   
432    160    
-256   80     
-496   48     
288    224    
112    96     
48     304    
208    64     
-352   320    
400    32     
-96    96     
-48    64     
32     256    
320    288    
-368   416    
336    32     
304    160    
-144   -80    
288    320    
-432   0      
336    192    
160    304    
-16    384    
64     -16    
-400   -288   
-128   16     
464    1072   
288    784    
-320   240    
352    448    
0      -816   
-32    -304   
-352   -976   
304    672    
-176   320    
352    464    
64     624    
208    832    
-144   496    
-128   496    
432    272    
96     -48    
-128   192    
80     384    
-64    688    
384    -32    
112    496    
-128   192    
-48    784    
96     -976   
256    16     
-80    464    
-192   352    
112    0      
144    -32    
80     -160   
-224   -272   
144    432    
-128   -1040  
160    384    
192    -208   
-288   2752   
1280   64     
-496   -16    
-448   1376   
560    368    
560    1040   
-784   1456   
-96    -32    
320    96     
-32    288    
192    -656   
-128   480    
-32    -448   
256    384    
224    -160   
-272   304    
-112   -208   
80     464    
96     -224   
0      80     
-80    880    
656    288    
-688   320    
48     144    
240    416    
96     96     
-96    224    
16     -288   
32     112    
48     -48    
80     16     
144    -192   
48     80     
384    240    
-304   -496   
96     224    
656    -528   
-384   -784   
-128   144    
576    -608   
96     128    
-16    -512   
-272   48     
-192   16     
240    80     
432    64     
-240   -48    
80     -208   
224    48     
1264   736    
-688   1056   
-880   -352   
1184   -176   
-896   48     
-368   32     
-64    -128   
608    -928   
192    464    
272    -1728  
-96    192    
80     -272   
112    -240   
-16    -112   
-16    128    
160    -304   
-80    -80    
-544   -336   
688    96     
0      496    
-16    -528   
-640   -432   
816    -448   
0      -512   
-512   -368   
864    -80    
-416   -1152  
-592   -1712  
-144   -1520  
912    240    
-288   752    
288    1088   
320    288    
-416   16     
-192   -240   
192    16     
64     -160   
-400   -544   
-208   -304   
352    -912   
144    16     
48     -1392  
0      16     
-176   -176   
320    192    
752    176    
416    560    
160    192    
-112   1584   
416    608    
-16    240    
-752   -192   
304    -112   
192    64     
-592   -16    
400    384    
-304   -368   
-160   -688   
-1040  -368   
160    208    
-176   80     
176    -80    
80     -128   
-208   608    
416    128    
-240   144    
144    -416   
-64    80     
64     448    
192    288    
-544   -1296  
1344   -1888  
64     176    
-320   -416   
-896   16     
896    -192   
144    -400   
-304   1072   
16     736    
-432   -48    
576    -128   
128    -96    
-320   192    
-624   272    
192    -160   
912    160    
-208   -64    
-384   80     
-224   -336   
128    -480   
272    -848   
-192   -224   
-128   288    
-288   -80    
-208   112    
928    -448   
-496   64     
-48    -176   
-16    176    
0      -880   
304    -544   
-224   -864   
80     128    
-128   -784   
-176   0      
32     -64    
192    -272   
-336   -384   
224    0      
112    -16    
64     64     
-224   -176   
176    32     
-656   48     
-384   -192   
176    192    
384    -256   
-192   240    
-64    496    
688    96     
-112   -32    
-272   -240   
400    -384   
-496   -96    
-16    -96    
48     -176   
-144   224    
320    0      
-224   224    
128    -160   
16     32     
-304   -144   
-48    -64    
16     48     
-256   0      
-112   32     
-208   0      
64     -32    
-720   -48    
32     672    
480    -256   
-640   -128   
-240   -16    
64     16     
-208   16     
480    656    
-1152  320    
208    -144   
192    48     
-80    -208   
-176   -64    
-1088  -112   
2496   -1168  
-624   -80    
-976   -208   
976    256    
144    -96    
-656   352    
224    48     
-272   -176   
192    48     
0      -128   
-144   -240   
-144   48     
400    144    
-96    320    
-96    336    
128    -272   
-480   16     
176    80     
-112   80     
624    32     
-1792  80     
784    -80    
560    224    
48     -192   
-224   -96    
-96    16     
192    -48    
48     112    
192    -96    
-320   0      
-64    64     
48     16     
-176   -128   
240    48     
-80    32     
96     -32    
64     112    
48     -32    
176    48     
-208   96     
-96    32     
-112   80     
336    144    
-224   -112   
-432   240    
512    -48    
-448   176    
160    0      
144    384    
-208   752    
160    640    
480    240    
16     -96    
0      80     
-192   32     
-144   0      
96     -80    
112    -64    
112    128    
-208   96     
80     16     
-96    -96    
272    16     
-448   -112   
-16    144    
80     128    
-224   -16    
192    -48    
96     -48    
-304   -32    
592    784    
752    -96    
-992   160    
992    128    
-128   64     
-480   64     
208    224    
560    -64    
-384   16     
-352   144    
32     -48    
176    64     
-816   -80    
304    32     
-336   176    
144    0      
96     224    
-32    48     
-48    80     
-208   144    
480    768    
-720   -16    
-464   96     
400    128    
80     128    
-160   256    
-384   -608   
-992   528    
896    -32    
-384   -16    
0      112    
-32    112    
48     64     
-112   -144   
144    0      
-96    192    
256    144    
160    -112   
0      -96    
-96    176    
-256   16     
416    64     
-64    128    
-272   -64    
320    192    
320    16     
96     64     
-240   64     
-736   -416   
1520   1264   
1120   -128   
-1888  -288   
-272   32     
352    32     
384    144    
-192   -160   
-512   256    
512    128    
-288   160    
0      -32    
256    112    
-160   -80    
80     240    
288    80     
96     32     
-464   144    
384    -32    
-496   -272   
-16    208    
272    256    
80     48     
-512   -112   
-32    144    
480    -272   
-624   0      
160    -16    
-224   -16    
32     -432   
320    -576   
-496   -528   
16     -32    
64     80     
64     -544   
-224   -320   
224    0      
-272   288    
-512   -368   
432    -448   
112    -192   
-240   -16    
112    80     
192    0      
-80    -144   
176    -16    
80     -288   
48     -144   
-144   592    
192    432    
-48    -832   
-16    -384   
-80    1024   
864    128    
-416   752    
640    640    
-352   464    
160    1072   
736    1808   
-208   512    
32     -480   
32     16     
0      80     
0      96     
256    240    
-96    720    
-48    -336   
288    -208   
-464   -256   
96     208    
32     -368   
0      80     
144    32     
-32    32     
288    416    
-176   192    
-160   112    
176    96     
112    -288   
-192   -48    
80     272    
0      -160   
-592   224    
1072   -224   
-848   240    
272    -160   
288    192    
-32    -96    
160    -16    
-272   160    
-112   176    
144    -96    
96     48     
32     48     
-160   64     
192    112    
-32    -768   
224    -128   
-48    560    
16     192    
32     16     
0      144    
416    -160   
-80    208    
704    -32    
-576   208    
-112   192    
176    144    
80     368    
112    -432   
48     -64    
-16    -128   
192    384    
-96    -240   
96     32     
-64    400    
192    144    
-368   176    
176    176    
16     736    
-112   224    
16     -112   
304    -192   
-48    0      
-80    -256   
144    -272   
272    -160   
80     176    
144    -640   
384    -16    
-480   192    
1456   304    
-2800  0      
-480   -384   
1536   -704   
-528   -816   
-256   -176   
112    -224   
496    -1024  
-208   912    
144    -192   
-16    -224   
-160   128    
368    32     
-64    128    
-352   -384   
272    48     
224    64     
48     -304   
-416   -624   
-16    224    
-48    -128   
1200   688    
-336   48     
-512   -256   
992    80     
-560   432    
352    608    
256    1680   
1328   1584   
-384   1568   
80     1232   
96     64     
128    -128   
256    -128   
-16    288    
64     -96    
16     240    
-32    816    
624    -48    
96     272    
-336   -352   
-48    176    
496    -416   
224    -192   
-544   784    
288    -112   
816    -144   
128    160    
64     272    
16     512    
-80    -48    
528    -48    
0      224    
-352   48     
416    672    
-592   -16    
192    -144   
-176   0      
-496   128    
656    -1840  
-160   16     
112    96     
160    32     
-224   736    
544    -416   
-144   -2016  
448    -288   
-112   -416   
-112   64     
160    -544   
1056   656    
-1776  576    
944    -64    
976    -16    
128    64     
-768   -560   
-32    464    
656    -128   
96     560    
-80    -560   
-304   -1152  
592    -176   
-144   0      
320    224    
48     -352   
-352   0      
352    -1632  
-400   -64    
656    736    
-208   1712   
-128   320    
480    32     
-224   -544   
-400   368    
320    -208   
-304   128    
176    144    
-496   -16    
336    -176   
-32    -32    
-80    -128   
48     -176   
128    -208   
64     -528   
112    -64    
-64    -432   
272    0      
64     -272   
176    80     
176    112    
-176   16     
-272   -96    
336    -160   
-32    144    
432    176    
-416   -80    
240    -144   
160    80     
80     304    
-528   -128   
352    -48    
368    1008   
-496   48     
-160   -160   
96     0      
336    -144   
-624   128    
192    -224   
-592   112    
176    -112   
-64    -16    
48     -528   
-144   80     
192    -432   
-80    112    
64     -48    
144    -48    
-304   -224   
-32    -288   
272    -480   
-176   64     
64     -64    
112    -80    
-544   96     
192    32     
-16    112    
-16    -448   
64     256    
64     -16    
0      -112   
-528   -1184  
2480   1104   
-224   912    
-1040  96     
512    128    
-384   -128   
-192   -224   
768    -144   
-384   -64    
-720   -112   
272    -368   
224    -288   
256    224    
-272   -80    
-16    384    
544    -1200  
-336   -192   
48     288    
-144   -192   
-176   -176   
304    16     
-576   -80    
1328   -368   
-688   -32    
-592   -224   
688    368    
64     -304   
-416   160    
-96    -336   
272    -208   
-144   -1184  
304    96     
-272   224    
288    16     
32     64     
-48    -64    
-592   -192   
528    -80    
-240   -48    
224    -112   
-208   96     
96     -256   
0      176    
288    -192   
-320   128    
432    -112   
0      96     
112    64     
-112   -16    
96     0      
-192   -1632  
-928   -992   
1360   -160   
-832   80     
112    -16    
-32    -80    
592    -272   
-416   -64    
-32    -448   
224    -176   
-32    112    
-1024  -48    
-256   16     
-96    -160   
464    96     
-592   -112   
224    144    
-64    -48    
-480   -64    
320    32     
-208   96     
-240   864    
-608   -608   
-1312  -240   
1536   -160   
-704   144    
-448   80     
256    32     
16     368    
-448   16     
80     -32    
64     48     
-112   16     
-64    48     
-400   64     
-176   -32    
-208   48     
208    -64    
-224   -448   
-128   0      
96     112    
-144   -80    
-208   -400   
-400   304    
848    -32    
-1136  64     
640    80     
496    80     
-736   32     
176    -80    
112    256    
16     -288   
0      160    
-256   -144   
-112   -240   
288    -128   
-48    -96    
-32    -64    
-560   240    
224    -48    
-144   -32    
0      -48    
-656   384    
400    -48    
-192   -64    
112    -320   
-208   -48    
96     176    
112    80     
224    -32    
-1120  480    
1216   -1328  
-400   1120   
688    -176   
-1056  -160   
-384   368    
368    -80    
1040   -16    
-320   -192   
-1072  -352   
-64    192    
176    -16    
48     96     
160    144    
-272   32     
-96    144    
32     128    
240    144    
-112   128    
-352   720    
304    1184   
48     528    
128    32     
-560   64     
-192   -112   
-64    240    
336    32     
48     624    
-48    1360   
-240   272    
64     -144   
192    32     
-288   368    
32     160    
-80    -176   
-80    -304   
224    -32    
-704   -464   
-176   256    
96     496    
-320   -256   
208    -368   
112    240    
-224   -464   
288    704    
-16    1088   
336    352    
0      224    
-400   -496   
160    -64    
-80    -64    
128    -304   
304    -320   
-1136  -144   
720    -928   
-400   144    
144    736    
-176   -528   
240    16     
240    64     
-352   112    
-160   48     
256    -32    
-208   16     
336    -48    
352    16     
-128   304    
128    -176   
-224   64     
-528   240    
16     112    
-16    16     
-96    80     
-208   64     
128    128    
16     -16    
-256   64     
384    176    
-96    256    
-64    48     
96     -48    
576    -48    
-1552  304    
320    112    
-16    0      
496    -48    
-240   0      
288    192    
0      544    
16     -208   
-80    -128   
80     224    
-192   288    
32     192    
-48    176    
-64    -176   
64     80     
-224   48     
160    400    
48     0      
112    -80    
-448   -416   
320    192    
-400   112    
128    32     
240    192    
16     96     
-416   416    
144    32     
160    -176   
-144   -304   
80     256    
-160   432    
112    384    
-96    -48    
-64    32     
48     368    
-64    224    
-320   368    
416    832    
-288   384    
-96    -96    
224    224    
-32    -16    
-256   416    
-192   -96    
16     -48    
208    -96    
-368   -192   
416    -16    
-496   -784   
2112   -896   
-288   1232   
-304   240    
400    528    
-160   608    
64     48     
544    208    
-128   1008   
-352   -240   
0      -368   
576    -832   
-144   -288   
-272   -1376  
32     416    
368    192    
-144   208    
-16    528    
144    -240   
112    16     
-128   -192   
496    -144   
-2032  592    
1168   496    
-688   -928   
-288   -1568  
592    -752   
-1232  -688   
1312   -496   
-64    400    
-176   272    
96     96     
-96    48     
256    544    
-304   336    
-288   -32    
304    128    
64     368    
-336   -144   
144    96     
-64    256    
400    128    
96     416    
-960   0      
800    -48    
208    336    
-368   -304   
624    80     
-288   416    
208    32     
-160   -112   
240    208    
464    112    
48     288    
-304   160    
-336   -80    
128    528    
704    -48    
16     448    
304    304    
144    -928   
16     160    
-80    48     
-80    48     
-112   112    
384    96     
-464   80     
-192   160    
160    -64    
128    -96    
-656   -2400  
976    -2928  
304    400    
672    112    
-384   64     
-688   -208   
528    -32    
336    400    
176    -256   
-608   64     
288    -208   
-144   96     
-64    16     
368    304    
-320   -48    
96     192    
0      -336   
-112   112    
80     -128   
0      896    
592    -320   
-784   528    
336    -752   
592    64     
320    -80    
-800   192    
672    400    
-448   32     
224    -16    
-32    128    
-48    176    
16     32     
80     16     
-240   -48    
336    128    
-640   -176   
592    -32    
-768   -752   
592    288    
-448   16     
-64    288    
464    32     
-448   192    
112    256    
-208   112    
464    464    
-96    -144   
-272   304    
272    -512   
-80    -48    
-304   -336   
160    80     
-64    512    
1040   128    
-864   16     
-64    -80    
768    240    
-144   192    
-192   192    
0      160    
-272   320    
208    0      
160    160    
-80    -48    
16     -16    
-48    -272   
352    432    
-176   784    
304    528    
160    -464   
-320   192    
336    64     
-32    368    
-288   96     
176    -64    
240    112    
-112   -304   
-112   -48    
400    240    
48     528    
-96    -160   
-304   -2432  
-1216  1632   
2112   256    
-1136  272    
576    -128   
384    624    
-896   144    
-176   -1152  
832    -656   
-272   -1872  
-176   -256   
-80    -496   
-16    240    
336    -464   
-192   -48    
96     240    
-544   -16    
512    -960   
272    80     
-224   -32    
48     784    
-928   -576   
-48    128    
800    -112   
-352   -304   
-96    -96    
224    160    
-304   -176   
176    -144   
192    -352   
-96    -688   
-208   80     
464    16     
-304   176    
32     -96    
304    272    
-320   0      
384    384    
-560   128    
0      96     
160    -64    
256    -288   
-336   -16    
176    -992   
-160   144    
528    -16    
-384   144    
176    -224   
-80    112    
464    144    
-2096  512    
2592   80     
1344   0      
-2528  48     
1216   160    
48     144    
-704   -640   
320    192    
176    -368   
-192   96     
-16    -768   
256    96     
16     -224   
224    80     
-672   -192   
656    128    
-144   48     
64     -48    
-736   -224   
-256   -240   
80     0      
-496   192    
1760   -320   
-768   -80    
-416   -688   
256    -1072  
208    208    
16     -192   
96     208    
-96    -160   
240    16     
144    352    
-512   128    
0      -176   
-96    -112   
240    -64    
160    144    
-496   -176   
416    -352   
-224   -112   
16     -560   
128    16     
256    336    
384    -208   
368    48     
-336   0      
-656   -1248  
96     144    
240    -144   
-400   64     
672    -192   
-96    -224   
-416   96     
-32    -224   
-16    32     
400    16     
416    96     
-240   -1440  
-320   288    
384    96     
-144   -416   
-320   160    
336    -96    
-144   -160   
-128   272    
-288   -448   
-432   320    
96     -80    
-224   -208   
448    -48    
320    64     
16     -656   
352    -480   
848    -32    
-960   -208   
-336   -240   
352    -784   
640    -1968  
-752   -1312  
64     -336   
288    720    
-64    -240   
-224   80     
-144   144    
80     480    
192    0      
-128   -224   
256    -16    
-144   192    
32     320    
16     80     
0      -112   
-128   -256   
-288   96     
336    160    
-624   208    
656    208    
-432   496    
224    272    
-288   144    
288    96     
192    -192   
336    -496   
-416   -240   
128    336    
-368   1040   
208    416    
160    272    
-512   -608   
464    -96    
32     480    
352    -240   
-144   -16    
-112   -176   
-48    672    
192    -176   
-160   16     
160    -624   
-368   0      
-208   144    
-128   176    
-144   -1152  
-208   144    
544    256    
-128   -240   
288    -432   
-48    -640   
688    464    
-144   1680   
64     800    
-128   -16    
-96    -80    
-80    -384   
-256   -448   
-128   -272   
-32    160    
224    64     
-464   -32    
32     -144   
-1408  -32    
-256   -48    
16     -32    
96     368    
-80    -128   
-16    64     
-176   -144   
208    80     
-208   336    
224    224    
-48    112    
-16    32     
720    304    
-1216  528    
656    -192   
-352   272    
160    32     
-64    256    
16     176    
-384   112    
176    384    
-160   -80    
-128   -320   
-80    32     
224    -32    
-208   272    
-176   128    
16     32     
-80    -320   
-160   -112   
-16    -96    
64     224    
-1328  816    
800    -16    
-1056  96     
640    176    
-352   592    
96     240    
128    224    
-256   672    
-544   -256   
80     -160   
432    128    
192    80     
-400   -400   
-464   -144   
416    -240   
-416   432    
-96    -176   
-464   240    
64     -112   
304    144    
32     -208   
-80    112    
-320   -208   
272    -32    
208    128    
-112   256    
-240   -240   
-80    32     
-256   -160   
896    1264   
-160   16     
-1408  192    
1520   256    
-896   -48    
304    112    
-208   320    
128    320    
80     96     
96     304    
-256   112    
-64    288    
192    -64    
-16    0      
-704   -32    
288    64     
176    112    
-32    -16    
48     192    
64     -32    
-80    224    
128    288    
640    -752   
-1360  320    
640    -576   
-224   368    
-240   480    
-416   -272   
992    -48    
-800   176    
144    64     
-80    -80    
-304   -112   
352    48     
64     -32    
-320   128    
240    48     
-96    272    
16     144    
48     256    
-576   144    
-16    0      
560    496    
288    -64    
-32    224    
-208   432    
-192   64     
368    448    
608    -240   
176    -352   
-656   96     
560    128    
16     -64    
-272   112    
-416   96     
-144   -912   
336    -128   
-80    160    
-432   128    
-624   320    
496    192    
112    80     
-336   -128   
144    304    
304    80     
32     16     
-816   224    
496    48     
128    128    
-592   -400   
864    -1616  
784    -2592  
32     1104   
784    192    
-576   0      
272    272    
-48    144    
480    48     
-176   32     
176    176    
496    -112   
-240   352    
-224   288    
448    112    
-144   16     
-144   16     
80     96     
-48    64     
-176   -176   
496    704    
272    -96    
-816   368    
528    96     
352    32     
480    224    
-544   128    
272    128    
-272   -112   
0      0      
80     96     
-48    80     
320    128    
-272   192    
368    -48    
208    144    
-464   -1664  
80     288    
688    48     
-656   208    
608    352    
-336   16     
96     -48    
416    32     
-208   96     
0      192    
-112   464    
192    528    
-256   272    
208    -144   
-160   -192   
-32    -1280  
-16    -528   
608    -576   
-128   80     
144    176    
-160   192    
-176   -192   
-336   -16    
384    -128   
-96    -176   
-96    144    
224    160    
-16    64     
-128   144    
16     144    
224    -320   
192    160    
-544   176    
144    336    
272    -32    
-256   -464   
-176   48     
416    528    
-336   176    
208    0      
48     -448   
96     16     
-304   336    
112    112    
160    16     
48     -368   
-1280  -656   
2192   -3168  
-464   -512   
-1152  80     
1424   368    
-64    112    
-496   32     
-240   -1408  
288    144    
112    368    
-224   16     
128    96     
-64    0      
320    -112   
-272   496    
64     -128   
-160   -1088  
224    160    
-192   16     
272    32     
240    -656   
-1008  992    
848    -240   
-432   -112   
192    160    
160    304    
-32    896    
-32    256    
96     -160   
128    160    
48     -64    
-80    160    
0      224    
368    -2768  
-384   96     
80     16     
-64    224    
112    32     
-16    336    
48     0      
-80    16     
-16    16     
16     -112   
128    -16    
224    -128   
-480   -96    
400    -352   
-192   320    
48     -896   
-768   -944   
1680   -224   
-656   128    
-576   -224   
1296   144    
-944   -240   
256    -224   
336    192    
160    -96    
64     272    
-224   16     
192    176    
160    -192   
-112   48     
-112   -192   
368    288    
-64    144    
-96    96     
0      -96    
256    80     
64     64     
368    512    
-1584  352    
240    -96    
224    576    
64     -304   
16     64     
64     -288   
480    336    
48     160    
-192   -544   
-224   16     
64     192    
144    -96    
16     48     
160    128    
64     -48    
-144   -224   
192    -496   
48     32     
80     -80    
-144   288    
16     128    
112    240    
-224   -112   
416    -48    
-560   288    
-720   -2336  
208    -1632  
304    -880   
-640   -96    
224    48     
-32    -416   
144    -192   
416    -560   
320    192    
-240   480    
400    -1200  
0      80     
304    -304   
48     -208   
32     -64    
64     48     
80     192    
16     0      
0      -32    
224    -928   
48     48     
128    -208   
-32    -688   
-32    16     
-48    -1264  
-2048  -336   
1424   864    
-96    -560   
-592   -1200  
160    -256   
-336   -16    
512    -528   
160    672    
-32    -512   
-736   192    
144    -352   
400    -48    
32     -704   
16     -336   
-256   96     
432    112    
-208   -208   
-192   -192   
80     -864   
0      96     
320    320    
-752   -160   
-144   128    
880    -432   
-192   -1088  
-112   -48    
-208   -976   
-240   -576   
272    192    
64     -480   
-64    480    
-176   -448   
160    368    
272    -272   
-208   -272   
32     -160   
304    384    
96     304    
80     -336   
-64    80     
-384   432    
480    -352   
144    176    
-48    720    
-80    -272   
256    448    
-32    80     
112    -560   
112    -144   
-336   -784   
448    -16    
-320   -528   
32     -576   
-80    -656   
-736   -144   
-144   80     
240    -240   
64     -672   
-336   -112   
-32    80     
0      -32    
288    -784   
-48    96     
-16    -176   
272    464    
64     -224   
-320   -32    
-16    -288   
192    -304   
-464   160    
144    -16    
-160   32     
32     -320   
-1040  -256   
-224   -144   
16     -144   
-96    -96    
-64    336    
256    -400   
352    1008   
-944   368    
528    -560   
368    32     
-336   48     
480    384    
-608   -368   
16     -640   
320    -288   
-144   480    
-16    128    
16     96     
192    336    
32     -128   
16     -656   
-32    -64    
-208   160    
176    432    
80     0      
-144   64     
304    240    
-992   -192   
848    -960   
-240   -32    
-240   352    
-112   112    
288    -240   
16     -416   
-192   304    
-32    656    
160    -96    
-112   96     
-128   320    
64     -32    
80     304    
-176   -80    
-160   -144   
112    -128   
160    -64    
-80    208    
144    0      
-64    144    
-976   -240   
176    -16    
-224   -192   
-336   -176   
240    112    
-880   -32    
-128   208    
464    16     
-1024  1280   
2176   224    
-1024  96     
112    -512   
816    192    
-800   -272   
-96    -16    
288    352    
0      -32    
48     272    
-112   -80    
32     112    
-256   -256   
432    160    
-544   -160   
-80    192    
-16    -80    
-176   0      
-112   -304   
-16    128    
-16    -32    
-256   -400   
-1216  544    
1872   -16    
-1232  32     
224    -32    
464    144    
-496   -112   
496    -32    
-528   224    
368    80     
-736   16     
-272   144    
-464   -192   
256    192    
464    -32    
-112   304    
-336   -96    
80     -224   
-368   256    
-320   224    
272    288    
-896   320    
672    -160   
-512   176    
-96    -96    
80     -544   
512    80     
-96    -384   
128    48     
704    80     
-512   208    
112    144    
32     112    
-240   176    
224    -64    
-304   256    
48     48     
224    432    
-416   -176   
-592   96     
-112   64     
256    80     
-1120  -336   
-528   -80    
160    -240   
-176   160    
224    -160   
192    128    
-272   -1552  
-2320  -1136  
608    432    
-592   864    
352    240    
96     -64    
-736   256    
208    16     
-272   64     
160    48     
352    -80    
-176   64     
32     32     
64     192    
96     -16    
-32    160    
-160   -64    
-96    208    
176    -96    
-304   -64    
912    -864   
-752   208    
592    -176   
-592   144    
48     32     
112    160    
-560   -64    
800    -384   
-432   -192   
64     -96    
-112   192    
192    0      
-32    176    
160    96     
-320   -32    
256    -48    
-128   -176   
-96    48     
640    64     
-240   48     
176    192    
-80    176    
384    256    
-144   -32    
304    0      
-48    656    
-256   272    
144    112    
112    -112   
-384   0      
144    -112   
-288   -32    
528    608    
-864   400    
160    -592   
-32    -320   
-352   16     
304    32     
-144   -64    
256    112    
256    144    
-96    -144   
-112   -48    
-32    80     
160    0      
-176   32     
80     32     
-16    -32    
48     256    
-48    368    
-160   256    
32     224    
176    -80    
128    80     
32     272    
-16    16     
-320   192    
208    352    
-272   448    
272    32     
-80    -240   
-560   -880   
1776   656    
-192   544    
-944   448    
560    -416   
-624   16     
464    336    
336    160    
-160   224    
-576   352    
304    -48    
336    0      
-16    -144   
-288   272    
32     16     
176    -64    
32     144    
0      352    
-80    320    
-16    -16    
224    96     
-256   176    
256    -432   
-48    -16    
144    112    
80     -160   
-48    -272   
-192   -192   
144    -144   
0      -128   
96     16     
0      288    
32     256    
-208   96     
176    48     
256    144    
-128   320    
0      -48    
224    -240   
-160   -528   
-208   -176   
176    368    
96     -64    
-160   -80    
-16    64     
0      240    
112    16     
-176   -528   
96     -96    
32     -48    
704    1264   
336    -80    
-2048  -176   
1552   416    
272    368    
-560   16     
672    224    
-432   -1616  
48     -352   
16     144    
224    384    
-32    96     
-192   -256   
480    432    
-336   240    
-144   240    
592    -64    
-80    -320   
-304   -928   
256    -832   
-96    -96    
-576   -240   
832    128    
1408   272    
-1744  480    
352    -96    
592    -912   
-528   -1552  
64     -416   
32     -224   
96     -112   
-96    128    
128    32     
48     32     
-128   -192   
192    -288   
176    176    
-416   -688   
144    -640   
80     -576   
-16    -336   
-16    368    
-64    -208   
240    1328   
-16    96     
-64    1872   
-80    816    
400    1392   
-224   928    
64     400    
576    -944   
-464   176    
112    768    
416    784    
-320   -672   
-400   304    
16     128    
32     944    
960    752    
-336   -304   
432    336    
-128   624    
-160   224    
-16    -1120  
240    80     
-80    64     
304    336    
-144   96     
32     800    
480    592    
0      -352   
-1008  -1776  
-784   816    
480    64     
-304   -512   
752    880    
-496   -816   
-32    448    
96     1040   
256    432    
704    -160   
-192   272    
-144   32     
160    848    
-16    -672   
288    128    
112    400    
16     -176   
-80    256    
112    -272   
48     528    
48     -272   
16     -48    
320    -48    
-512   464    
400    512    
176    320    
-352   480    
272    400    
-304   -400   
160    -1088  
112    176    
-240   64     
240    256    
160    -576   
-368   256    
400    144    
256    592    
-448   -384   
144    -832   
336    -288   
-288   240    
-128   336    
320    48     
-224   224    
-32    -176   
160    -1024  
-128   -960   
-192   -432   
48     16     
256    304    
-576   -448   
736    -640   
-368   32     
-304   -544   
288    224    
-144   -720   
-464   -832   
160    -480   
224    672    
0      560    
144    656    
48     -176   
-112   256    
112    128    
128    128    
-128   0      
176    -304   
-400   -336   
-288   -400   
496    -32    
-288   80     
144    128    
176    32     
-240   160    
528    80     
-416   -1008  
96     -432   
112    -32    
80     304    
160    -32    
160    -1328  
-816   192    
992    -688   
-768   784    
800    640    
-816   320    
224    496    
-112   -448   
32     -880   
-128   -656   
16     -240   
-48    -304   
64     -1760  
144    96     
16     -48    
-48    128    
-48    -144   
-80    -176   
0      -208   
208    -48    
512    704    
-1280  208    
224    -96    
-208   -176   
-256   -400   
240    -384   
-80    -320   
144    -144   
48     -96    
144    -112   
32     96     
-224   -144   
96     192    
192    -128   
-368   -112   
320    144    
-128   -80    
368    32     
-400   96     
560    0      
-272   -144   
-144   16     
224    -560   
0      160    
304    -352   
-352   208    
-208   -16    
560    48     
-416   -208   
-976   -1936  
2032   224    
4128   352    
-640   480    
-784   256    
-224   160    
624    -96    
-464   208    
528    -688   
-64    112    
-496   -896   
144    144    
256    -112   
320    336    
-64    0      
-256   112    
176    -160   
80     -112   
-480   -272   
48     -96    
-48    -160   
-48    288    
-352   -176   
2112   -288   
-304   880    
-928   -496   
-128   304    
864    -800   
-720   96     
128    96     
96     -32    
-16    0      
-64    -96    
-144   32     
384    16     
-848   96     
624    -288   
-64    -272   
-336   -48    
368    112    
-304   -64    
16     144    
336    -176   
-384   -672   
-400   304    
1472   -160   
-672   624    
288    48     
-64    -144   
96     -128   
64     48     
448    -128   
-144   64     
-288   80     
144    32     
320    176    
-160   -416   
80     -176   
752    1056   
-288   64     
-144   -384   
416    208    
96     0      
-176   -32    
-64    32     
-240   -304   
816    -208   
64     32     
16     -192   
-64    208    
-1296  -1264  
-1312  2256   
1600   48     
-2496  -368   
-544   -128   
816    -256   
80     336    
96     -64    
-288   512    
-464   48     
128    240    
320    -144   
-208   80     
-256   -224   
-304   208    
432    -160   
-480   176    
176    -32    
-272   -16    
592    416    
-640   160    
112    528    
592    -304   
-576   -32    
864    64     
-336   32     
-240   16     
-32    64     
-400   -256   
528    -336   
-480   -16    
144    -16    
-128   64     
192    -128   
16     -96    
-192   -128   
-16    -176   
-64    -176   
128    -176   
-176   160    
-16    256    
-208   -144   
48     352    
-240   -352   
64     -288   
464    0      
-240   -64    
-112   96     
-32    -128   
112    64     
-224   32     
-16    80     
-128   -880   
32     -64    
-432   -512   
-624   -560   
528    -448   
16     -112   
224    16     
160    496    
-352   112    
160    256    
-48    160    
-96    -64    
-64    144    
-48    16     
64     64     
0      -112   
-48    64     
-352   -48    
-96    144    
-96    -416   
-272   336    
656    -688   
-848   -448   
-144   128    
432    448    
288    432    
-144   0      
-432   -592   
144    -176   
560    1648   
-960   -832   
-544   416    
1072   928    
-560   -320   
-1264  -16    
224    -1680  
96     -192   
-16    32     
-96    -96    
320    336    
-80    96     
128    144    
-176   96     
-112   -128   
48     128    
112    176    
-48    144    
-16    -192   
80     32     
-304   512    
-432   -144   
176    208    
784    336    
-400   -16    
-352   -48    
-64    1056   
464    -448   
-160   -128   
-128   -640   
112    704    
144    -16    
-64    32     
-80    -128   
-256   -128   
0      128    
240    -32    
-80    448    
-272   496    
-224   -176   
512    -320   
96     208    
-272   -64    
-128   256    
432    -208   
-352   -432   
160    -240   
0      192    
-224   96     
208    32     
496    -512   
-3424  -688   
880    304    
928    -272   
-832   -832   
-112   -32    
-160   -704   
-368   528    
192    -144   
352    -144   
-192   160    
-384   208    
208    48     
0      48     
-64    -80    
-144   160    
96     -16    
-16    144    
288    -336   
192    144    
-432   -240   
1104   -640   
-1296  240    
864    -416   
-384   -672   
-128   -576   
464    144    
-576   -48    
-16    -1504  
160    -560   
-224   752    
96     864    
112    -48    
192    -416   
192    320    
288    48     
-304   272    
224    272    
-640   -112   
240    96     
320    96     
-368   -160   
512    -304   
16     496    
-592   -288   
64     -608   
176    -240   
928    1632   
864    1088   
-480   -592   
48     -512   
128    -432   
-128   288    
-176   -480   
480    640    
448    -64    
-48    -736   
688    -528   
-384   -160   
464    304    
144    176    
-192   160    
-16    -368   
-112   -64    
272    160    
-128   336    
-320   32     
-80    720    
272    416    
-240   176    
1104   2544   
-1264  1136   
144    -64    
1024   -1712  
-1056  -368   
-96    576    
224    640    
496    1472   
192    1552   
-544   -496   
80     -192   
592    448    
-16    400    
-288   912    
-272   -160   
-224   112    
400    272    
-144   208    
-80    416    
-544   -736   
368    -384   
336    -352   
-512   32     
-192   208    
208    672    
-48    -160   
368    -864   
-96    -944   
-192   -112   
112    -528   
-48    -64    
256    80     
48     -16    
-32    -304   
304    -896   
-96    592    
64     368    
32     16     
-80    176    
0      384    
-64    400    
176    192    
-112   -240   
272    -80    
-96    -496   
64     -544   
-208   -368   
48     -896   
16     -656   
-288   -480   
256    0      
-144   -528   
-816   -16    
1280   464    
-144   448    
-48    256    
176    -32    
-608   -176   
272    -48    
-352   224    
416    96     
80     16     
-160   -32    
16     -16    
208    -112   
-96    64     
112    -1616  
-64    -64    
48     -704   
-208   16     
-128   -416   
-128   -240   
96     -288   
144    -64    
-112   272    
320    528    
-560   256    
-48    -48    
432    -160   
-96    -448   
80     1200   
-496   -1888  
-400   240    
1488   -1504  
-720   144    
-48    -48    
0      96     
560    144    
-352   -240   
-368   192    
336    96     
-32    160    
336    -208   
-144   32     
64     -592   
32     480    
-512   -320   
448    0      
-208   -688   
-16    -192   
128    272    
240    1520   
624    -240   
-912   0      
752    -80    
16     -224   
-80    384    
96     0      
80     288    
-224   -224   
32     128    
336    -192   
-176   272    
64     -688   
-32    128    
-64    -64    
304    48     
-32    -64    
16     336    
80     96     
-256   -976   
464    64     
-32    -208   
128    112    
-288   -208   
624    112    
-528   -688   
304    240    
160    -272   
-224   -64    
-272   128    
-160   1088   
-48    448    
80     -32    
528    464    
-1152  -304   
1200   -240   
368    0      
-704   -96    
272    -48    
320    240    
-272   -272   
256    192    
112    -144   
-544   -80    
416    144    
208    -2208  
-256   -112   
64     -1056  
-16    -832   
-16    -16    
480    16     
-1152  -432   
-384   -224   
1312   400    
-2000  -48    
432    48     
416    -224   
-848   0      
512    -480   
32     -32    
64     -64    
48     144    
-288   -16    
-16    -16    
-256   -208   
32     -976   
160    -160   
-128   -1520  
-32    -352   
144    112    
144    -16    
-32    544    
1328   -64    
-976   -608   
464    192    
544    256    
-864   736    
-576   -192   
544    -272   
288    -256   
0      0      
-128   -112   
-32    -128   
288    -192   
768    -1728  
-640   -176   
272    240    
-112   208    
-32    -96    
304    -80    
-256   64     
224    -96    
-48    -64    
-64    -176   
-448   -80    
576    272    
304    80     
-208   -224   
128    192    
1904   5824   
-976   3344   
-720   -1104  
1552   -400   
-336   -80    
-304   208    
-272   48     
800    -320   
-288   -128   
-64    160    
496    -16    
-448   -64    
336    -16    
288    -240   
-320   -48    
-64    -384   
80     144    
176    -512   
-16    64     
48     1040   
592    1376   
-496   720    
176    -224   
80     32     
-592   -176   
384    256    
-176   32     
-928   -240   
240    0      
48     -544   
64     -240   
-112   0      
-32    -400   
-48    112    
112    -256   
368    64     
-288   496    
608    544    
-320   352    
0      -48    
208    -64    
-160   -544   
384    -384   
-240   96     
-224   176    
304    -336   
-432   304    
464    -160   
-64    48     
160    -960   
288    272    
-432   -144   
384    -400   
-656   656    
560    192    
-224   528    
-48    656    
512    -96    
224    -304   
-288   368    
128    96     
-80    16     
112    -544   
96     -48    
48     -224   
-32    -32    
-32    -592   
192    16     
-128   -32    
-176   160    
-160   -224   
128    560    
-32    512    
-48    64     
112    208    
-80    -208   
-32    96     
368    -288   
0      464    
-80    -112   
-96    96     
256    400    
-112   560    
192    -16    
272    -640   
224    -416   
-176   -96    
-16    -704   
-16    -864   
-80    -208   
-400   -16    
128    64     
-192   -224   
32     64     
48     -80    
-256   -112   
-32    224    
-368   464    
144    160    
0      240    
-368   -16    
128    -512   
-1024  -48    
512    96     
-432   144    
-256   -544   
-96    -48    
-544   -560   
128    -144   
144    208    
80     128    
-320   64     
-288   -96    
96     80     
-944   608    
64     -96    
-16    -144   
-64    -16    
-272   -96    
96     0      
-48    -160   
-112   32     
-288   96     
96     208    
224    112    
-352   192    
64     48     
-80    -64    
-336   64     
64     80     
192    208    
-1840  1600   
3024   -976   
-960   128    
-896   -160   
1056   -896   
400    -304   
-496   240    
432    -1280  
-736   -432   
-240   -720   
160    800    
240    -16    
-288   0      
-96    288    
112    192    
-976   -64    
-32    320    
192    0      
16     -48    
-176   -208   
816    1200   
-704   -720   
-1200  464    
1376   -16    
-832   240    
160    640    
592    1664   
-240   336    
64     -464   
-96    -752   
-400   384    
208    224    
128    352    
160    304    
-128   -112   
-48    -48    
-16    -224   
-336   -1024  
208    -512   
-112   144    
-256   240    
64     16     
-32    -64    
192    -496   
-464   -160   
480    -368   
-192   -720   
288    -1328  
-384   -528   
-48    368    
304    192    
-544   64     
240    -128   
-48    336    
-320   -1360  
-240   384    
64     -480   
64     -480   
160    -48    
-208   -752   
-304   -320   
32     384    
-560   -320   
400    80     
96     -160   
320    448    
240    224    
-288   -224   
544    224    
-240   272    
-928   -1952  
48     -80    
352    576    
-784   -176   
928    -640   
-400   240    
64     -80    
320    256    
-384   432    
-144   -224   
224    256    
-128   -160   
224    96     
-288   48     
-32    256    
96     160    
32     64     
176    -16    
-448   -320   
-96    896    
288    928    
-112   464    
-208   -512   
640    432    
-96    80     
-656   160    
224    -144   
32     160    
-32    256    
48     -80    
-96    96     
-32    -176   
-64    176    
16     -144   
384    272    
48     -64    
-768   -480   
352    -192   
208    112    
-144   208    
0      -64    
-528   -304   
512    -160   
416    48     
-304   144    
128    368    
-240   112    
16     288    
272    80     
-208   224    
-192   80     
-144   -640   
32     -96    
224    576    
-400   -16    
96     160    
544    -48    
-432   16     
144    592    
-288   80     
224    144    
48     96     
-224   -64    
192    32     
-80    128    
-208   160    
512    -224   
-272   176    
-304   32     
528    -208   
64     480    
-32    -16    
-96    -416   
-32    0      
96     224    
-16    336    
-304   -224   
96     96     
160    48     
-144   80     
80     1392   
-48    -2320  
-1744  688    
1648   -240   
-592   -160   
-512   256    
64     336    
992    32     
-480   -272   
-144   48     
112    240    
-64    -128   
256    336    
-48    48     
-272   -256   
160    352    
-48    64     
144    -144   
-16    128    
96     80     
-320   -592   
944    -528   
-784   400    
64     144    
544    -96    
-464   80     
80     -352   
64     464    
656    -240   
-640   192    
80     -32    
-96    224    
624    -112   
-352   144    
64     144    
0      176    
192    272    
144    -48    
128    48     
-272   -16    
96     160    
160    -96    
-32    160    
-176   -112   
304    -144   
-128   -48    
-96    -1264  
112    32     
-48    80     
-64    -208   
-1248  1184   
3904   1456   
-1616  -80    
-1200  -240   
1120   256    
-144   16     
48     -16    
-208   -288   
288    64     
-320   -48    
112    112    
320    -96    
96     128    
-320   -816   
608    256    
-96    48     
-208   48     
256    160    
0      176    
192    16     
32     160    
-496   -736   
112    224    
560    -672   
-128   -192   
-336   192    
736    -288   
-544   320    
-224   -2592  
400    272    
96     0      
144    80     
-48    -16    
-112   144    
0      80     
576    64     
-112   32     
-96    304    
-80    272    
192    48     
224    32     
-224   -528   
624    64     
-272   -512   
208    128    
96     -144   
-608   256    
304    -112   
80     -96    
-272   240    
176    16     
-256   -208   
640    -304   
-32    384    
-432   -192   
560    -80    
-48    -48    
-208   -64    
432    -256   
-64    128    
80     -80    
144    96     
-144   16     
96     144    
96     16     
320    368    
16     -32    
-368   -48    
320    208    
256    256    
-1536  -736   
-336   -48    
608    -80    
-192   -320   
608    -64    
160    -944   
-496   848    
384    16     
-160   128    
192    16     
-208   48     
224    448    
-128   -144   
32     272    
272    -432   
144    144    
-96    -160   
96     224    
0      -688   
-304   -528   
352    128    
-48    336    
-112   32     
80     160    
192    -240   
-368   -1248  
448    640    
-368   384    
208    640    
32     -288   
-560   -656   
304    -480   
112    368    
160    320    
-352   96     
16     96     
112    -832   
0      0      
48     -80    
-160   -16    
-352   -16    
592    -48    
-272   640    
192    880    
-336   96     
384    -640   
64     -560   
128    -544   
288    -912   
-256   336    
336    112    
112    -1200  
-352   368    
704    272    
-880   240    
512    288    
48     -656   
80     -1552  
-160   1200   
128    272    
240    -944   
-160   368    
224    176    
-16    96     
-320   384    
144    80     
16     -672   
-32    -64    
176    -544   
224    16     
-96    0      
224    -192   
96     -64    
-48    -288   
112    64     
48     -112   
352    0      
16     -896   
144    -80    
-176   48     
0      64     
112    -768   
-176   96     
32     304    
-528   -112   
176    -64    
192    -144   
-304   -336   
-192   -48    
-160   304    
48     32     
448    -224   
-128   -672   
-208   48     
256    32     
64     208    
288    112    
-304   80     
-272   192    
112    80     
-368   -560   
1200   -864   
-416   720    
-80    -64    
176    -112   
-256   -192   
496    160    
-496   576    
496    -96    
96     -736   
-96    -48    
-160   -160   
368    -64    
144    80     
32     192    
-32    80     
-192   -16    
-16    -192   
240    272    
-688   64     
-80    -432   
176    304    
224    -32    
-160   0      
48     -512   
-16    192    
96     -96    
240    -96    
48     -48    
-480   48     
1328   352    
-2416  528    
-240   16     
1216   -752   
-1120  -928   
0      368    
240    1520   
-160   -624   
304    -1200  
16     368    
-192   352    
0      -1552  
128    -144   
-32    96     
96     -240   
-288   -112   
48     -176   
-400   -960   
208    448    
16     160    
-368   -656   
1136   816    
688    -224   
-1472  784    
1376   -1440  
-320   -176   
-208   768    
240    576    
1040   864    
-304   272    
-272   448    
32     -192   
336    240    
-240   128    
0      256    
352    -496   
-688   256    
672    -128   
-672   32     
0      -16    
192    48     
176    80     
-1008  -256   
192    2320   
-400   704    
-1216  64     
912    -96    
400    400    
-1216  448    
448    -224   
80     -448   
32     96     
-288   -64    
-96    256    
32     -816   
560    -160   
-432   48     
240    432    
384    -208   
-80    624    
-928   304    
-192   -64    
176    32     
-144   -288   
-368   128    
-128   272    
896    -96    
-352   96     
-464   0      
784    992    
1104   3328   
-1344  1232   
512    -224   
1152   -272   
-1568  -64    
-96    -144   
1120   -208   
0      -496   
144    -80    
-432   -80    
224    64     
128    -32    
64     -64    
0      -80    
-16    224    
-240   -64    
240    208    
-304   -144   
32     544    
32     48     
-208   592    
48     -64    
-496   64     
-528   80     
608    144    
-320   -192   
-112   64     
-16    -192   
-144   -16    
32     192    
688    112    
-544   80     
272    32     
192    -64    
-416   0      
-288   -240   
496    48     
-160   240    
-48    96     
0      304    
0      -208   
-400   -32    
272    80     
96     176    
-176   128    
-144   80     
-16    16     
224    224    
-224   0      
16     32     
96     64     
192    1344   
-592   48     
-640   16     
560    80     
-80    -48    
-336   -64    
112    -144   
176    -208   
176    -112   
-432   -16    
80     -16    
80     144    
-80    192    
64     -16    
-32    144    
-128   192    
144    448    
0      80     
-624   240    
-96    -320   
-16    16     
32     192    
-64    160    
-32    -128   
48     -368   
-96    608    
160    32     
-64    -112   
32     144    
-336   -208   
1440   2080   
1648   528    
-1456  512    
-144   512    
-112   -320   
48     144    
160    -160   
96     1056   
160    -48    
-304   -144   
240    256    
208    -176   
-256   32     
112    80     
160    288    
-16    -272   
32     720    
-160   96     
-64    -16    
-64    -32    
144    1504   
336    -208   
-688   16     
368    -80    
-96    32     
160    944    
352    -208   
-544   -112   
64     -64    
48     96     
224    0      
-192   448    
-128   -64    
-48    224    
-128   -128   
-144   128    
432    -48    
16     -144   
-496   112    
400    144    
288    160    
-16    -80    
-288   112    
16     -64    
416    208    
-368   -144   
288    144    
-368   48     
160    256    
432    -880   
-1568  -1184  
448    -48    
-80    128    
-544   -336   
704    272    
304    480    
-512   336    
-432   32     
384    -224   
32     112    
-16    -48    
-48    192    
-80    -192   
384    64     
-288   -112   
64     128    
-64    272    
208    544    
-224   432    
-48    96     
400    48     
-1488  384    
928    368    
-208   704    
592    -128   
-128   400    
-480   304    
-96    -208   
48     160    
192    -64    
0      128    
-192   128    
0      112    
384    128    
-448   96     
-64    -16    
128    160    
64     464    
-48    -48    
-224   -240   
160    0      
-272   -96    
112    -128   
-16    -160   
576    -144   
-448   512    
208    80     
-160   0      
-208   112    
-128   80     
224    -480   
864    -464   
-928   320    
224    160    
544    -96    
-832   368    
96     -16    
176    32     
-80    -256   
0      304    
-208   0      
128    160    
160    -16    
-96    272    
400    496    
-640   320    
-208   32     
512    128    
256    80     
-1472  -256   
1552   -1600  
96     304    
-704   -16    
-672   -656   
496    752    
-128   272    
176    256    
176    -176   
-336   432    
-96    720    
496    352    
-160   -624   
-208   304    
-160   -192   
352    -64    
240    -32    
176    -64    
-112   144    
96     -1024  
16     336    
112    416    
112    352    
-48    -464   
64     -528   
-16    -288   
-64    80     
-64    -576   
-432   336    
80     448    
272    496    
-48    192    
-288   -672   
16     192    
64     -624   
128    -672   
64     -528   
-96    -400   
-160   -1072  
176    64     
-96    144    
160    -32    
-16    -288   
0      -64    
-256   -224   
128    128    
96     -1728  
-432   -1152  
336    272    
160    272    
-16    192    
-336   -912   
624    384    
48     800    
-368   848    
560    176    
-144   240    
-32    -400   
320    -1280  
288    -864   
-496   1056   
112    416    
-32    -80    
352    304    
0      -16    
-240   96     
112    -256   
208    -256   
-352   -1936  
-256   352    
368    32     
-16    192    
160    64     
-64    48     
64     0      
224    288    
-432   448    
48     0      
544    0      
-416   -480   
0      176    
64     -240   
80     752    
480    -208   
-240   -16    
16     224    
112    96     
64     -16    
144    672    
-96    480    
-160   -416   
352    128    
-192   -160   
-16    208    
352    -144   
-176   240    
-16    -112   
176    64     
112    -368   
112    -64    
32     80     
672    368    
-1264  640    
720    -96    
368    -48    
-80    -64    
-160   400    
-96    -304   
464    512    
-80    688    
48     144    
-32    0      
0      192    
-128   -256   
96     -48    
144    320    
240    496    
-496   -288   
-832   -784   
480    -2624  
144    -128   
-128   480    
-352   96     
128    48     
272    -224   
240    304    
-464   -144   
32     16     
256    -32    
-224   -16    
304    -128   
-1792  864    
2096   48     
-608   336    
-736   -400   
336    -240   
352    128    
-1008  -592   
208    -1296  
304    -336   
-368   96     
48     -48    
80     -224   
-32    160    
160    64     
144    176    
96     -400   
-368   -416   
192    -256   
-160   -320   
0      -128   
-48    -720   
784    -640   
-1424  288    
896    288    
336    192    
64     256    
-64    -256   
96     -32    
160    64     
-144   -496   
-448   64     
416    112    
-16    -48    
-192   112    
-672   -224   
320    -384   
0      128    
-176   -128   
192    -112   
224    -736   
-224   -128   
16     0      
-48    400    
848    -336   
-576   96     
-32    -896   
160    -192   
-240   -624   
80     -880   
80     -48    
-64    192    
256    336    
-192   64     
128    -96    
208    -624   
-640   -320   
96     -976   
0      640    
240    32     
64     96     
-16    32     
-112   -48    
32     112    
240    0      
-368   -32    
288    -16    
-160   16     
224    -144   
-160   -32    
-272   -2000  
-1424  -3776  
-240   -1712  
400    304    
-128   -64    
496    -128   
544    208    
-848   -48    
-288   160    
336    -576   
-32    96     
-272   -176   
-592   112    
80     -304   
-336   -16    
96     -336   
-416   224    
208    -912   
32     112    
272    -384   
-912   -16    
608    -208   
-512   144    
448    96     
672    144    
-656   -80    
-560   -16    
704    176    
432    32     
-656   -16    
160    48     
512    -16    
-16    -160   
-160   128    
-240   32     
160    224    
624    224    
-96    112    
-304   192    
208    -128   
-192   96     
272    -160   
-560   16     
176    -32    
304    80     
-192   -320   
-288   16     
144    -320   
288    128    
16     16     
-32    32     
-160   -64    
208    464    
-1088  -192   
144    -608   
-608   -176   
624    -176   
-528   -96    
-352   -208   
496    320    
384    -208   
-384   128    
-560   -144   
-272   96     
112    176    
-272   16     
-96    -112   
-64    352    
-240   192    
-112   -112   
368    208    
48     64     
-336   -32    
-1168  -416   
112    48     
-240   176    
-528   -48    
-112   -1216  
-48    176    
-16    384    
-192   -256   
720    2160   
-1008  -1648  
-1040  464    
1072   -304   
-1040  -112   
-272   528    
608    192    
48     80     
-320   -80    
-48    -192   
240    -64    
-368   320    
368    -240   
-128   288    
-480   -32    
160    16     
160    112    
-64    -352   
-672   -96    
80     272    
-96    208    
576    1472   
496    -176   
-1152  32     
496    -592   
-192   240    
64     128    
48     -272   
144    -560   
-352   96     
320    192    
112    80     
-272   224    
-128   -16    
-32    208    
336    160    
32     96     
-288   -64    
80     48     
-192   -48    
32     0      
-64    48     
176    112    
80     32     
-480   32     
608    176    
-608   -160   
48     64     
160    80     
192    -96    
-1168  -1936  
-1616  -208   
2368   -432   
-960   -128   
512    176    
144    192    
-544   128    
16     368    
256    -272   
224    112    
-304   112    
-32    96     
192    0      
-96    0      
208    16     
-720   0      
-48    -144   
-128   -192   
-272   -64    
64     176    
-16    80     
-480   -672   
704    -336   
336    -96    
-400   -624   
-224   64     
288    192    
-16    -112   
-64    0      
64     176    
16     32     
176    96     
-256   -16    
-64    0      
272    128    
-16    -16    
-128   80     
-16    16     
112    80     
-48    48     
240    160    
-144   -64    
144    112    
368    64     
-80    128    
80     320    
272    816    
-640   -160   
-656   64     
560    304    
-208   -32    
-176   208    
352    -144   
0      496    
-736   -144   
176    144    
160    16     
-160   0      
-32    0      
-240   160    
32     -144   
256    96     
-320   -80    
-176   16     
144    64     
-64    -976   
-112   -256   
-192   144    
-176   784    
416    992    
-96    -64    
176    -1104  
336    864    
368    544    
-864   -496   
224    224    
624    48     
80     -48    
-240   -560   
-176   -64    
144    -160   
416    736    
-192   192    
-224   -304   
-32    240    
432    -496   
-144   -688   
-128   400    
-32    -32    
208    -16    
-144   -352   
48     416    
32     0      
-256   -176   
-176   -832   
96     -544   
-240   -352   
64     -64    
-160   16     
32     -160   
224    -64    
-128   -32    
176    32     
-80    -96    
-144   80     
400    -80    
-464   -64    
288    -592   
224    864    
80     752    
-48    336    
-64    -48    
192    272    
96     160    
224    32     
-368   160    
-144   400    
512    576    
-96    -16    
-272   -32    
80     224    
368    80     
-928   1008   
592    576    
448    1552   
-16    -16    
-240   -832   
-96    -1648  
-672   -912   
304    1168   
192    656    
208    -48    
16     304    
-352   96     
144    -96    
112    80     
-112   -224   
-144   48     
208    112    
-64    32     
80     64     
96     16     
-32    48     
-224   160    
112    144    
496    432    
-816   656    
32     384    
400    336    
112    320    
-224   -64    
-592   -352   
752    -304   
-656   688    
288    -224   
-480   -112   
-16    96     
-192   -48    
-96    -96    
-48    160    
-256   176    
48     304    
288    32     
-192   -64    
-64    -128   
-112   176    
96     -1056  
240    -112   
-48    -128   
-176   -32    
-160   -400   
672    -912   
288    112    
80     48     
-320   -352   
-64    -256   
208    -976   
352    -224   
-352   336    
-48    208    
48     -128   
400    -480   
208    448    
-144   672    
176    -112   
-48    448    
144    112    
80     112    
-336   48     
96     -16    
256    208    
0      240    
-64    -32    
-112   160    
352    -16    
-144   208    
-176   -592   
208    128    
0      -1312  
208    704    
-288   -912   
-1056  -672   
640    288    
-496   96     
96     656    
1104   -112   
-1248  192    
576    64     
112    192    
48     -144   
-32    160    
80     0      
128    176    
-48    -448   
-288   48     
288    -1024  
-80    176    
-48    272    
160    336    
-16    96     
-80    96     
-368   -880   
256    -64    
384    -160   
-864   -336   
640    336    
704    -336   
-512   240    
-448   -432   
208    32     
112    -1136  
240    128    
48     -64    
-272   208    
-80    -80    
496    128    
-128   32     
-176   112    
48     -272   
-128   -48    
320    208    
16     -272   
-256   -704   
-656   112    
240    336    
-512   -432   
400    -352   
240    -176   
-448   544    
240    -448   
16     64     
512    -16    
-64    96     
96     288    
-240   -224   
-64    -128   
-16    0      
192    192    
-384   -240   
-288   224    
432    -624   
160    -48    
-160   -32    
-192   64     
0      32     
112    -416   
-48    208    
-64    -496   
-544   64     
720    784    
288    -2688  
-2432  -992   
2016   -160   
-1056  -464   
80     480    
944    -400   
-704   112    
-224   336    
368    -464   
128    -80    
-1296  48     
80     -496   
-128   -96    
224    -1248  
-240   -176   
32     -16    
80     -112   
-528   96     
304    -656   
928    -2320  
-448   -128   
192    -288   
-112   240    
-736   -352   
720    -80    
-48    -144   
-368   -544   
240    -16    
-224   64     
336    -48    
-96    -656   
272    -160   
-128   336    
528    64     
-688   -240   
688    160    
-64    -64    
0      -64    
176    -80    
-64    -64    
48     -208   
-224   -224   
432    -48    
208    -256   
-608   -288   
336    -1184  
112    -544   
-272   -1984  
160    112    
-464   -160   
672    128    
-16    -576   
368    -240   
-800   -48    
576    32     
96     96     
-240   96     
-1248  -48    
-400   16     
416    -288   
240    -16    
160    -32    
-208   -48    
-80    160    
192    -304   
80     -80    
80     -224   
-96    80     
-48    16     
-240   -224   
224    -256   
80     -128   
-240   16     
304    -144   
-48    240    
-48    288    
-144   128    
192    -624   
240    816    
-240   -1600  
-528   -352   
1952   1280   
-224   560    
-1200  176    
368    -128   
-512   -464   
416    -48    
144    -64    
144    464    
-1392  448    
176    -400   
336    -304   
32     -64    
-80    0      
-64    -400   
480    -176   
-48    176    
176    208    
-336   -64    
96     112    
112    48     
-80    -1200  
-208   368    
624    -128   
-960   -336   
368    16     
224    -272   
-80    256    
-304   288    
112    160    
496    160    
32     -160   
-192   -16    
-128   0      
-64    -144   
352    0      
112    80     
-16    -16    
-240   128    
-176   0      
16     -288   
160    -128   
416    -336   
-544   -16    
608    -464   
-224   -16    
-320   -48    
16     48     
-160   -16    
336    16     
-528   1888   
992    -496   
-1840  160    
1744   -32    
-272   176    
-608   32     
528    448    
-480   -128   
400    176    
-48    -320   
-240   192    
80     16     
64     208    
80     -112   
240    -48    
-528   -192   
192    16     
16     -112   
-272   -64    
64     -80    
64     -80    
64     -720   
-1280  640    
2096   528    
-1904  304    
-144   0      
688    -352   
-1056  416    
368    208    
-480   -160   
240    160    
160    -48    
-384   -80    
176    144    
48     -64    
-64    -112   
-96    160    
-80    -48    
48     432    
384    304    
-112   128    
-176   112    
-64    144    
-32    480    
-1376  496    
368    240    
224    96     
-384   640    
768    -384   
-352   48     
-272   -128   
-144   -80    
272    -528   
128    -112   
0      320    
192    -848   
-112   -320   
128    272    
80     352    
-96    128    
-160   272    
-128   112    
192    80     
16     80     
48     112    
-64    32     
416    -176   
-48    -80    
-448   592    
256    240    
32     160    
-1008  -64    
-32    -224   
-800   496    
272    -624   
48     -304   
-176   -240   
-48    1904   
-416   400    
400    48     
128    112    
64     176    
-288   -480   
-384   -320   
112    96     
528    -400   
-144   16     
-528   224    
-320   288    
384    -64    
176    624    
-288   848    
-240   -368   
272    -608   
-64    224    
112    -320   
-240   -240   
32     560    
496    1952   
-128   48     
0      -544   
-176   -240   
48     448    
448    -64    
-320   -384   
-192   -496   
0      544    
-112   336    
-336   -432   
400    -112   
-800   -336   
96     176    
16     256    
112    -400   
112    -160   
-288   544    
240    656    
-400   -208   
368    -176   
-592   368    
112    368    
-272   -752   
560    -608   
-1088  -304   
-96    -32    
-448   -80    
80     -320   
96     176    
-48    832    
-64    2048   
80     304    
-64    -448   
0      32     
144    -16    
-32    80     
-112   224    
-720   -608   
144    -240   
0      -320   
64     544    
-288   -256   
-368   -224   
-16    320    
48     224    
144    32     
192    -480   
-304   -768   
-384   304    
288    928    
256    112    
160    -48    
-32    -1456  
-1184  -512   
-128   496    
896    1120   
-1168  1232   
-528   -368   
192    -576   
144    -96    
368    -208   
-240   368    
-192   96     
-96    208    
224    208    
-64    -224   
-320   16     
176    272    
0      528    
16     -64    
-112   288    
-48    64     
-176   -912   
416    -640   
-688   112    
352    -880   
-160   144    
-64    -16    
-112   -256   
-112   176    
240    80     
16     80     
-128   -144   
0      256    
-32    16     
-128   256    
176    -64    
-512   -352   
288    64     
32     672    
208    80     
-32    64     
0      112    
240    96     
-144   192    
0      -192   
-128   176    
240    -64    
-48    320    
16     16     
-64    -112   
-32    -624   
1216   -1216  
-1072  256    
256    -208   
656    192    
-256   208    
-528   416    
736    352    
-208   -208   
-576   -112   
368    64     
-112   160    
176    16     
-48    96     
16     112    
128    48     
176    240    
-288   -80    
-176   64     
112    48     
-256   0      
64     -32    
608    592    
736    80     
-528   224    
176    -16    
-224   -16    
336    64     
128    272    
32     288    
-144   192    
-112   112    
160    96     
96     64     
-112   -32    
208    192    
-48    64     
-16    240    
-368   -48    
288    80     
176    192    
-512   -128   
544    32     
-1328  -16    
-192   -1056  
1488   96     
144    704    
-432   -16    
-304   -208   
480    -272   
256    304    
112    80     
-464   96     
144    176    
800    0      
-192   512    
-672   224    
-48    192    
656    -48    
496    -736   
-352   112    
-400   128    
-208   -176   
656    -48    
-224   112    
-512   -48    
656    -496   
-240   -112   
880    -176   
-208   32     
-1648  -2400  
1888   -672   
384    -640   
-784   -1408  
400    -1600  
368    160    
-16    -464   
-752   384    
544    -64    
192    336    
-368   96     
-256   80     
672    -16    
-240   272    
-128   32     
64     304    
-16    144    
-192   -48    
816    32     
-288   -528   
-1232  32     
1248   -432   
-400   96     
720    0      
-256   -64    
-400   -144   
528    48     
-336   112    
272    -112   
-112   144    
16     -416   
-272   224    
432    -336   
-256   272    
480    -144   
112    160    
-112   -480   
-208   32     
352    272    
-384   80     
-96    16     
144    96     
144    192    
-128   -48    
-96    32     
496    -160   
-16    128    
-96    16     
128    32     
144    -624   
-288   112    
64     -208   
-256   -560   
48     -464   
64     -96    
-368   -16    
160    272    
96     -144   
80     48     
176    416    
-528   576    
336    160    
160    -432   
32     -176   
-32    -240   
-32    -80    
-96    16     
336    272    
-224   256    
224    336    
320    192    
-80    144    
32     256    
-128   320    
64     112    
224    -368   
112    -144   
-96    -240   
64     464    
400    112    
-128   288    
672    2224   
-1904  -992   
-272   160    
2240   -128   
-448   976    
-1248  1248   
352    336    
640    -288   
-384   -272   
-80    -112   
0      -880   
-160   -752   
192    -352   
112    -48    
-320   0      
-32    -480   
448    -16    
352    512    
-80    -1024  
16     144    
-128   -656   
624    496    
-1072  -128   
224    -1152  
240    -384   
80     -624   
-144   -224   
0      752    
208    -16    
-128   16     
224    -304   
-32    -576   
176    336    
-64    -48    
-16    -144   
-96    144    
256    224    
-544   -240   
-16    112    
160    -704   
80     -240   
-80    -192   
96     -384   
192    16     
-80    -1584  
112    -272   
80     -304   
-64    144    
96     -16    
96     -16    
960    -368   
-2960  -32    
112    -464   
1424   -832   
-1168  -448   
-320   208    
688    144    
-864   224    
176    -624   
208    -1456  
16     144    
-160   64     
48     0      
192    -48    
-176   112    
-48    112    
-32    -128   
-48    -128   
192    176    
-656   144    
-512   -880   
1344   896    
512    -512   
-1680  1216   
1184   896    
-352   -880   
-640   -2608  
528    -848   
80     -592   
-368   -160   
-144   176    
320    208    
80     80     
-336   -656   
-224   -560   
48     -368   
-144   16     
496    -240   
-736   -1408  
-256   -1600  
416    -192   
96     -2064  
-144   16     
640    432    
-352   1200   
176    672    
784    640    
-720   160    
-192   192    
272    -560   
-224   288    
-288   -128   
-288   256    
528    -240   
-240   -480   
480    80     
32     -1040  
-928   -752   
672    -512   
-240   432    
400    144    
16     -192   
-432   80     
240    -176   
0      224    
352    0      
-656   -80    
192    816    
192    608    
-128   -128   
-368   -496   
1104   -1872  
-368   -528   
544    -112   
0      608    
-1104  336    
608    -112   
432    -368   
0      -432   
-544   -512   
32     400    
272    -464   
272    96     
-448   256    
208    176    
-128   464    
64     -464   
-160   -48    
-208   32     
160    704    
-16    224    
96     -240   
-352   -192   
320    304    
160    -400   
-624   -16    
400    256    
-112   1488   
288    624    
-32    16     
-16    -432   
272    -128   
32     -624   
80     368    
176    368    
-80    80     
16     -336   
704    448    
32     592    
-16    736    
176    848    
112    1072   
-64    48     
-512   -448   
-320   176    
-192   656    
80     -112   
416    224    
-368   -160   
-128   -448   
-176   -96    
-656   -80    
720    -48    
128    1440   
-1456  -1280  
-1008  608    
1440   -416   
-864   16     
112    1424   
112    800    
256    1040   
-16    480    
80     736    
-48    528    
-288   192    
48     -464   
-176   -80    
-320   -32    
-224   -192   
32     -1056  
-832   -816   
160    -384   
144    -384   
208    -352   
-320   -16    
80     416    
-16    32     
112    -496   
-32    -208   
-400   -208   
-208   -448   
1600   1600   
352    800    
-1296  -560   
304    160    
400    784    
-288   1664   
448    1344   
-608   1024   
-80    -384   
-32    -256   
32     -192   
-112   -128   
272    224    
-368   512    
112    -112   
-256   -96    
144    240    
-512   144    
80     64     
-688   -384   
816    -240   
-736   304    
448    96     
192    -256   
-528   16     
272    -48    
-16    352    
464    224    
-608   160    
112    80     
-80    -64    
240    -32    
-192   160    
112    48     
-352   -32    
80     192    
288    -16    
-80    272    
-16    48     
-96    224    
352    80     
-176   96     
288    16     
-368   64     
-32    48     
0      320    
160    96     
-128   48     
288    0      
-1488  -1936  
-752   -592   
2688   -80    
-1040  176    
-224   288    
160    -176   
256    32     
-192   -128   
-176   224    
176    -80    
80     208    
-16    64     
-256   80     
-96    -240   
256    256    
-384   -256   
-112   80     
16     16     
-48    16     
32     112    
-96    64     
-448   -592   
-160   240    
1072   -592   
-544   -336   
-656   112    
672    -208   
304    -224   
-576   -128   
-160   144    
320    96     
480    176    
-240   -48    
-256   -48    
-112   32     
-144   64     
464    -48    
-16    80     
256    -48    
-672   -496   
384    96     
176    32     
80     -160   
-544   96     
752    176    
-768   -224   
48     80     
960    592    
96     -48    
384    64     
-512   144    
192    16     
608    -304   
128    -144   
-480   240    
-160   144    
256    0      
608    -144   
16     256    
-208   464    
448    -96    
-32    128    
144    128    
48     80     
-144   96     
208    288    
-48    80     
-64    80     
-16    64     
512    1264   
-1968  -464   
-192   992    
1168   944    
-1392  -160   
576    272    
656    48     
-1056  -112   
304    192    
432    -144   
16     64     
48     48     
-96    112    
64     64     
-304   96     
512    224    
-240   128    
-320   80     
400    48     
176    304    
-576   160    
176    416    
448    -16    
-432   16     
192    208    
192    144    
-240   -80    
64     64     
256    96     
-192   192    
0      240    
-48    144    
192    -208   
48     -112   
-160   -304   
-32    160    
208    160    
-48    16     
96     -64    
32     16     
-64    96     
128    32     
-160   0      
80     0      
128    -16    
208    32     
80     160    
-128   256    
464    304    
-352   192    
144    272    
336    32     
-192   -608   
-592   112    
528    -192   
16     496    
-256   1088   
112    640    
144    32     
-128   48     
-144   -96    
288    -96    
384    64     
-976   544    
560    96     
144    64     
352    544    
-112   -992   
-80    576    
192    544    
336    288    
-48    144    
96     304    
-96    176    
80     0      
32     -112   
80     -112   
-240   -960   
-48    32     
96     464    
32     48     
-128   -16    
1232   976    
-192   432    
-784   -368   
288    -640   
-176   624    
432    192    
-112   688    
96     144    
-144   -128   
80     -16    
0      96     
64     32     
-96    -32    
32     -16    
80     80     
-96    48     
96     -736   
80     128    
64     -32    
-128   208    
-304   1040   
1008   32     
-656   496    
-64    272    
-16    128    
-240   -240   
544    -1232  
240    272    
-240   464    
-192   208    
112    -720   
304    32     
304    -368   
-240   -48    
-112   208    
160    48     
336    48     
-128   144    
-272   176    
176    176    
224    80     
0      -144   
-208   208    
48     -400   
432    336    
32     16     
-256   272    
-32    -624   
288    -64    
-16    -1264  
1088   -304   
-2224  96     
1808   -32    
-64    336    
-624   288    
432    240    
192    -624   
-288   1008   
16     128    
128    -576   
112    -256   
208    336    
48     -464   
-304   16     
-16    -1024  
256    64     
-128   -192   
-240   64     
208    176    
272    32     
-576   608    
2144   -624   
-1184  640    
592    -144   
-128   -416   
176    -384   
-608   -960   
96     -2000  
208    -480   
-160   800    
368    544    
-128   240    
64     720    
368    640    
-720   144    
224    272    
464    1392   
96     1520   
160    1136   
160    112    
64     -96    
-48    48     
-32    -96    
624    -416   
208    -272   
-592   -848   
192    672    
240    -1696  
-512   592    
576    -128   
256    -432   
-320   -272   
-224   -208   
48     48     
416    -784   
0      -272   
80     144    
176    800    
496    320    
-80    144    
-80    -768   
240    208    
368    608    
368    320    
-640   -352   
-432   -368   
-64    -320   
352    -384   
368    -192   
-400   -2848  
1360   -2064  
-160   480    
-496   -272   
-224   -1232  
432    -1008  
-128   -928   
208    -544   
-304   -880   
288    784    
-640   448    
80     -368   
48     -432   
-208   544    
-16    -64    
224    -416   
-144   -336   
-272   -1248  
128    -336   
192    -528   
16     -96    
-16    -16    
-64    272    
-848   0      
1040   1168   
496    80     
-768   144    
128    -384   
96     144    
608    -528   
-560   -800   
192    -208   
128    -656   
-48    240    
-176   16     
-112   112    
448    96     
112    0      
-256   -176   
-16    -208   
64     -432   
304    -416   
-368   -112   
32     336    
-112   128    
304    -304   
-368   -432   
288    -896   
-16    -208   
-16    -1728  
80     288    
128    16     
-240   -512   
-144   -432   
96     176    
-240   0      
336    704    
240    -256   
16     -752   
-1440  -96    
32     32     
528    -80    
-224   -400   
-336   0      
224    -480   
80     64     
144    -64    
352    -224   
-160   288    
-160   176    
208    -112   
384    -224   
-304   432    
112    224    
-128   -80    
-48    0      
432    -96    
-160   -304   
-304   256    
208    -704   
176    48     
-992   -1824  
832    -720   
640    -336   
-864   32     
1136   -144   
-832   128    
-128   176    
192    352    
-864   768    
640    -480   
-400   208    
32     -480   
-128   16     
368    -896   
32     272    
-224   -512   
-48    224    
-32    112    
-80    -112   
208    96     
656    288    
-1904  704    
1024   -208   
-688   -304   
-704   -304   
736    272    
-672   192    
144    64     
-48    -160   
576    -256   
-336   32     
-448   -48    
144    160    
208    128    
-208   272    
320    -32    
-32    32     
-496   -272   
256    80     
80     -80    
32     80     
0      -64    
-112   144    
96     -80    
-240   192    
-368   256    
224    -96    
-304   80     
-384   -32    
80     384    
32     1008   
160    720    
384    48     
-688   -448   
832    -224   
-96    -48    
-1136  464    
768    160    
0      208    
-112   -48    
-304   96     
256    48     
-32    -32    
80     -16    
-464   -96    
64     112    
-112   144    
80     32     
-32    112    
128    -192   
192    528    
-80    -560   
-784   480    
1408   192    
-1200  112    
144    416    
512    -16    
-208   160    
-720   128    
80     -48    
-288   128    
-48    48     
-160   -32    
-16    64     
112    -128   
-160   160    
-32    -176   
288    0      
-160   144    
-48    -80    
-64    16     
-128   -160   
-1024  304    
656    64     
-1008  256    
-432   -288   
384    -208   
1104   -32    
400    16     
-784   304    
-32    256    
-64    -160   
16     48     
-128   -112   
-80    -400   
-112   256    
96     96     
0      -304   
-720   368    
192    16     
-256   32     
48     96     
-528   -80    
-112   144    
-160   -144   
336    -368   
-128   -368   
160    0      
-224   48     
-1328  -2560  
2416   -2976  
448    -192   
-1264  560    
-336   144    
512    96     
416    -208   
-400   16     
-384   48     
320    176    
-592   -208   
400    176    
-112   -176   
-16    112    
32     -16    
128    48     
-208   80     
-48    96     
-336   32     
272    -736   
-736   -1776  
48     -1136  
-160   0      
48     112    
736    80     
-1040  -672   
-288   112    
16     144    
272    16     
208    128    
-208   144    
-48    416    
64     128    
-208   208    
384    304    
-336   448    
128    -368   
288    112    
-160   128    
-288   176    
-192   96     
48     48     
16     240    
-112   64     
-96    368    
784    416    
-528   224    
-240   352    
336    368    
112    352    
112    960    
-240   496    
64     1280   
1040   -480   
-528   -400   
-384   -336   
-32    -288   
48     32     
288    576    
-16    928    
-16    736    
-416   -368   
32     -768   
112    -224   
-112   -272   
80     160    
-304   64     
208    -496   
-208   384    
128    112    
48     368    
-96    -48    
-32    192    
144    96     
160    160    
-320   48     
0      -96    
160    -768   
-640   -1168  
176    -80    
384    176    
-288   -48    
640    32     
-224   400    
-144   64     
80     0      
-32    64     
0      144    
176    368    
-32    144    
-128   -48    
16     -128   
-64    176    
272    96     
16     112    
-80    48     
128    96     
-80    240    
176    -224   
-48    -96    
-128   176    
336    864    
-304   400    
48     -144   
352    -416   
-112   -512   
-384   528    
-128   -80    
784    -464   
240    64     
-608   0      
-448   240    
368    -96    
256    112    
0      176    
-160   128    
48     -32    
192    128    
-48    64     
32     112    
32     48     
224    -112   
-144   48     
80     32     
-64    48     
-256   656    
432    224    
-144   240    
144    -80    
272    -576   
-160   -256   
-944   -1200  
-368   1232   
1632   -176   
-1536  144    
720    -48    
480    256    
-496   -144   
512    -432   
160    1072   
352    992    
-240   -400   
-320   -464   
176    128    
32     -320   
64     256    
48     160    
64     256    
0      208    
192    80     
48     176    
416    1264   
-880   -736   
-1232  336    
1968   -272   
-944   16     
-1248  -1152  
320    -1648  
688    -352   
-1008  -2336  
176    -496   
-48    -576   
-336   -224   
272    16     
240    64     
-320   160    
416    144    
-96    112    
320    480    
256    384    
-192   96     
160    80     
-128   -144   
-32    -112   
-176   -160   
832    1728   
672    672    
-480   -320   
320    -320   
-192   -192   
-224   -512   
192    -144   
-128   -48    
272    32     
80     144    
352    192    
256    1360   
-848   928    
128    560    
272    -800   
-304   256    
-64    480    
-272   80     
128    16     
336    -144   
-64    96     
-304   -96    
48     144    
544    -16    
-800   -960   
-64    -624   
64     3296   
688    80     
-1520  -432   
160    -912   
1504   656    
-896   -96    
48     160    
352    224    
-80    128    
320    608    
-80    0      
-336   64     
256    112    
48     240    
240    48     
128    80     
-336   64     
464    192    
80     1200   
320    128    
-336   -992   
-48    -192   
224    -400   
-400   112    
208    -48    
80     -16    
-48    160    
64     -64    
-608   -432   
544    -464   
-480   -128   
288    160    
-368   -208   
112    -288   
128    176    
-48    -352   
-256   -16    
64     -464   
112    64     
48     32     
64     64     
-96    16     
-304   128    
400    240    
-80    -400   
-192   128    
-16    -160   
192    0      
176    192    
-192   208    
-128   -112   
496    720    
-656   -208   
-128   -256   
208    320    
-144   320    
-48    -16    
176    -128   
240    592    
336    80     
-208   144    
-160   272    
304    80     
144    -208   
16     112    
-176   128    
80     -144   
128    128    
112    -688   
16     -112   
-224   -528   
128    32     
128    -128   
80     -576   
-176   -144   
80     -16    
-80    -176   
192    192    
112    -80    
-160   48     
512    -1984  
-2752  1376   
1920   352    
-96    -2096  
-848   592    
1088   -128   
-528   368    
-96    -176   
144    -32    
80     64     
-160   -512   
-272   240    
496    -1152  
0      -368   
-368   432    
384    32     
-112   -272   
64     -32    
16     -144   
0      -16    
608    1664   
-1104  -304   
-432   -96    
1376   -480   
-656   -48    
-64    -112   
320    176    
96     -176   
-192   96     
128    -496   
16     -176   
-272   0      
256    240    
96     -48    
-256   336    
608    32     
-528   80     
-336   16     
-240   -144   
-128   -80    
-288   -48    
256    32     
-352   -624   
64     -64    
272    -1776  
-352   160    
608    -144   
-448   160    
160    -96    
672    1408   
-512   832    
32     960    
624    -112   
144    -48    
-352   -48    
-608   128    
752    176    
-208   96     
16     -80    
48     -32    
64     192    
16     -592   
64     -64    
176    -208   
-256   -208   
224    96     
-96    112    
64     -224   
-64    -160   
-224   -128   
-128   -736   
1136   400    
-544   64     
16     240    
400    -16    
-704   -48    
240    -880   
112    -560   
-272   32     
368    112    
-304   16     
80     80     
80     -128   
0      -176   
-1168  32     
416    -96    
-304   400    
128    112    
-288   -224   
-96    -272   
272    224    
-240   -528   
48     112    
256    16     
-672   192    
416    -112   
528    384    
32     -160   
-400   16     
208    208    
16     32     
-208   -32    
96     -208   
80     256    
-416   -224   
80     -176   
400    -352   
176    -144   
-864   80     
720    16     
-96    96     
-432   16     
-16    48     
144    176    
176    -208   
48     -432   
-48    16     
160    -144   
320    768    
-896   112    
1200   1520   
1216   -1008  
-2432  -160   
448    -16    
1056   -240   
-416   0      
-176   -208   
32     496    
-272   -32    
416    192    
96     -288   
-416   128    
-16    -160   
96     224    
-256   -224   
-288   240    
-240   -240   
-160   16     
-496   -848   
64     -432   
192    400    
-320   416    
368    -48    
32     -352   
-288   -256   
-416   112    
64     -128   
-80    -368   
-112   32     
48     464    
-416   16     
-16    -528   
32     64     
80     176    
-224   -16    
-64    176    
352    -704   
-864   -496   
176    96     
-48    368    
96     256    
-144   272    
-128   256    
96     -160   
-672   -832   
320    -1168  
-80    -176   
160    1664   
-192   -272   
-288   -592   
272    272    
144    640    
224    624    
-544   1648   
784    624    
-224   96     
-64    176    
32     -64    
-208   -288   
304    -96    
16     304    
-128   64     
128    176    
0      320    
16     -176   
-288   -656   
-384   -416   
0      384    
368    32     
-384   192    
-736   -144   
-224   176    
112    -16    
112    -32    
-128   16     
-224   -16    
80     16     
32     -128   
272    208    
-256   64     
-240   -32    
400    224    
576    208    
-480   -160   
-304   208    
-240   -432   
464    304    
-400   320    
-64    192    
160    -16    
-32    80     
16     64     
112    16     
-256   0      
432    -224   
112    304    
80     336    
-272   272    
-256   -192   
-16    64     
448    640    
-736   528    
208    -400   
544    -144   
-368   -240   
32     192    
-272   -128   
560    -976   
352    96     
-256   400    
-304   48     
-112   -336   
288    144    
-16    368    
-272   160    
-48    -160   
288    -688   
384    -304   
16     -96    
-64    208    
-48    192    
336    240    
-176   352    
48     80     
-320   -80    
144    208    
320    208    
48     240    
-720   16     
-64    -112   
-1520  -288   
1584   48     
-208   -400   
-784   -704   
880    208    
688    -480   
-560   -80    
64     1280   
-112   1744   
144    -544   
80     -832   
-544   48     
-80    512    
160    -160   
128    48     
-144   -208   
-224   368    
-32    80     
320    -112   
80     -320   
80     1312   
-496   -992   
-1104  624    
1600   -16    
-800   192    
-192   -144   
-736   -576   
480    -544   
-416   160    
0      384    
256    -16    
-112   -144   
-112   -304   
-272   64     
352    32     
-416   160    
160    -32    
-32    352    
160    -144   
-48    144    
-96    176    
80     432    
-64    544    
-736   -128   
-368   -720   
400    -416   
0      256    
-288   -128   
48     144    
-176   -176   
416    -80    
-160   240    
-128   -96    
320    48     
-32    -96    
160    -208   
-864   -720   
128    16     
400    208    
-368   -32    
-144   -80    
240    80     
224    -144   
352    176    
-224   -32    
336    -16    
528    144    
16     64     
-432   -416   
736    -480   
-896   2512   
800    864    
-864   -240   
-480   -448   
1344   192    
176    256    
-896   384    
-80    80     
304    208    
432    -192   
-96    192    
-224   -112   
48     224    
80     80     
112    80     
-64    80     
-144   -16    
0      96     
672    176    
-1120  -416   
944    0      
-160   224    
128    -96    
-336   208    
0      352    
272    368    
48     304    
-144   144    
-128   -144   
96     128    
-272   -176   
144    -48    
64     -80    
128    -144   
64     -80    
-320   48     
336    -128   
528    -256   
32     -176   
-16    256    
144    160    
-400   -64    
400    -32    
-64    -80    
-256   80     
144    0      
80     -144   
320    -320   
-512   -224   
224    -448   
224    112    
16     -1632  
-864   384    
496    304    
128    -224   
-720   368    
896    528    
-720   400    
288    368    
-240   208    
176    96     
176    -16    
-256   0      
144    128    
-464   -64    
416    256    
64     80     
272    144    
-384   272    
-176   224    
368    96     
288    208    
-192   240    
-128   144    
48     -80    
-16    48     
0      -144   
-240   -192   
128    -128   
-160   -16    
192    144    
176    -2912  
-1328  304    
1568   -1152  
-608   80     
208    528    
-80    160    
304    512    
-208   432    
-256   -112   
272    -96    
-112   176    
432    80     
-176   112    
80     32     
-96    112    
96     -208   
128    224    
-144   -368   
48     112    
-16    336    
256    1504   
800    -400   
-1152  -64    
432    -112   
272    -80    
16     304    
256    160    
-448   352    
-80    -416   
256    48     
128    -1152  
32     416    
-96    -192   
-80    -224   
16     -160   
416    -32    
-528   -128   
304    176    
32     -80    
-32    112    
192    16     
-112   -336   
32     144    
448    -736   
-496   0      
64     64     
160    208    
112    -32    
-112   -112   
624    -64    
-2144  16     
1120   240    
176    224    
-576   192    
544    -48    
-64    32     
-384   -32    
448    48     
128    -80    
32     64     
-144   -80    
48     128    
352    -192   
-496   48     
512    96     
-304   80     
16     -96    
256    -1008  
-128   -80    
64     -16    
80     208    
-1280  832    
1056   192    
-112   224    
-304   176    
464    -208   
-304   224    
-400   272    
16     -192   
144    80     
272    -272   
-144   0      
-128   -256   
176    -336   
-16    -224   
-208   32     
-16    -160   
432    -304   
-80    -64    
-144   -736   
128    -576   
1040   192    
-800   544    
80     -736   
512    368    
-464   -96    
-272   -144   
432    -400   
224    -160   
-288   16     
-80    0      
208    -160   
112    -192   
-128   -16    
112    -768   
1008   112    
-528   224    
-16    368    
288    -224   
-656   288    
240    -208   
-96    144    
64     32     
144    -128   
-112   368    
-304   -208   
-352   -192   
528    -112   
544    -240   
-816   -784   
944    -2848  
32     208    
816    336    
-240   -128   
-304   80     
976    1584   
-352   2048   
-384   80     
192    -416   
-112   -80    
192    176    
-336   368    
288    -192   
80     0      
48     -272   
-464   -624   
240    -448   
-144   -64    
224    -912   
-112   -464   
-192   0      
400    224    
-304   448    
-96    880    
112    576    
16     16     
80     -336   
32     -448   
-160   -672   
224    -224   
-304   288    
224    -256   
176    -560   
-288   -688   
-64    64     
208    -64    
160    -896   
-576   -912   
144    -592   
-48    -112   
256    -160   
-80    -208   
-352   -1360  
-272   -1168  
96     -16    
208    512    
0      -624   
-160   752    
16     -1296  
-32    368    
336    640    
-208   -784   
-208   -304   
128    -624   
-368   -272   
-272   -64    
-16    624    
272    1456   
-368   112    
96     -848   
96     -16    
80     128    
-112   -48    
-32    -912   
-16    0      
192    -16    
32     0      
-432   -368   
-16    -224   
-416   48     
320    -80    
144    80     
-192   -48    
-16    112    
304    -160   
-80    160    
496    -224   
-640   224    
-96    64     
640    -64    
-208   400    
-160   -176   
64     -80    
416    -64    
-224   -272   
-96    320    
16     208    
-144   32     
256    -128   
-48    -272   
-144   144    
-192   -80    
320    16     
-16    -272   
-496   64     
-192   -16    
96     -192   
-160   -544   
192    -224   
32     -64    
-400   608    
464    176    
-480   -240   
0      176    
-720   336    
176    368    
208    -384   
-592   -768   
128    -160   
16     272    
48     -272   
-528   160    
-96    160    
-352   272    
-96    320    
64     96     
336    -384   
-96    112    
-304   560    
-128   -512   
720    -304   
-112   304    
-224   304    
-352   -224   
304    -384   
-128   -304   
-288   272    
-288   160    
416    -128   
-64    -560   
1040   -320   
-1888  1552   
384    32     
304    1872   
1568   -848   
-2128  80     
608    -928   
704    -992   
-640   -288   
224    48     
144    160    
-64    -112   
-16    96     
-416   -208   
160    -16    
16     80     
16     -192   
-304   -256   
32     64     
0      -112   
-32    -896   
-720   240    
1552   64     
-1392  -32    
464    112    
464    288    
-1088  272    
192    -160   
-256   96     
128    0      
-160   16     
-80    16     
-1088  128    
-192   32     
-352   -80    
528    64     
80     384    
-640   32     
-32    -32    
256    -80    
-64    -256   
256    592    
240    80     
-16    -240   
192    640    
-224   576    
-64    176    
-208   144    
768    96     
-544   -128   
-240   -64    
272    176    
32     192    
-32    -48    
-128   144    
240    32     
176    208    
-288   16     
336    -688   
-288   -16    
0      48     
-112   144    
-16    32     
176    96     
512    272    
-1424  208    
272    144    
288    -48    
512    1808   
176    3424   
-944   1616   
1232   432    
624    112    
-832   16     
-448   464    
448    64     
160    96     
-48    -112   
176    96     
-864   80     
112    32     
240    -16    
-96    48     
96     16     
80     32     
-16    96     
-368   -16    
80     -144   
400    672    
480    0      
-1040  192    
912    192    
-848   -208   
64     -16    
-416   80     
784    160    
-832   64     
288    320    
144    -64    
-336   64     
144    -16    
48     96     
-368   -272   
240    176    
544    0      
-512   64     
0      112    
208    -224   
272    192    
-192   160    
192    144    
-144   144    
160    -208   
-384   -128   
-352   -80    
368    128    
-144   64     
176    128    
-192   32     
-48    240    
-96    -576   
640    -128   
-576   64     
256    464    
-128   496    
64     80     
0      -480   
-416   -32    
144    -304   
-336   0      
416    96     
-16    -144   
-368   80     
-128   -144   
160    192    
128    -416   
160    -256   
-80    1232   
-592   464    
576    -192   
272    32     
-272   288    
-128   144    
64     -144   
96     -96    
320    48     
128    240    
-304   -448   
-16    64     
192    208    
768    2592   
2144   64     
-1792  848    
352    80     
-176   32     
528    144    
-144   -576   
-192   144    
80     144    
64     -48    
400    80     
-192   0      
-80    128    
-144   480    
560    -384   
-288   128    
192    416    
-448   -32    
224    -48    
128    -64    
-480   -704   
960    -144   
-96    304    
-784   32     
512    272    
240    64     
-224   240    
-288   -64    
160    -240   
144    16     
32     32     
-32    -32    
-128   352    
-64    112    
144    96     
240    32     
-576   -208   
208    176    
96     80     
96     80     
96     64     
-128   -32    
48     112    
256    80     
-240   32     
-96    160    
288    32     
80     112    
-160   -112   
1904   1216   
-2992  560    
-816   352    
2176   112    
-880   96     
-352   336    
768    576    
-32    848    
16     288    
-240   -112   
304    32     
96     128    
160    -384   
-176   224    
-304   -2608  
304    192    
-48    112    
-192   96     
272    304    
224    48     
-192   80     
448    -16    
-1664  848    
1360   832    
-288   416    
-992   -192   
864    416    
-1008  208    
192    0      
-96    -704   
-128   80     
416    112    
-320   96     
-96    0      
336    -48    
192    -32    
-368   176    
192    80     
-432   208    
48     -32    
160    288    
352    176    
-416   -592   
592    -704   
-640   576    
656    -160   
-672   -1200  
-720   736    
656    -128   
-352   -96    
16     32     
224    96     
-256   -112   
160    32     
336    80     
560    464    
-672   -144   
320    -432   
352    464    
-16    -448   
112    -176   
-96    -1008  
64     192    
144    -384   
-80    128    
-368   304    
400    416    
352    256    
-400   288    
-80    192    
-16    80     
-16    2192   
1232   -208   
-1056  -496   
-192   -112   
624    144    
288    -1440  
-624   -1104  
-128   272    
352    -192   
224    800    
-80    -608   
-560   384    
128    96     
240    176    
96     464    
0      416    
80     -320   
192    16     
-256   -96    
96     -128   
176    -128   
128    240    
-288   -112   
320    224    
-144   -688   
-368   -528   
240    352    
192    768    
-352   -288   
96     -272   
64     816    
224    -256   
16     0      
-32    144    
416    704    
-80    -448   
-32    208    
272    816    
-64    656    
-112   -400   
224    -512   
320    -816   
-304   -144   
-48    -1152  
-160   336    
464    144    
-16    -816   
-272   80     
32     496    
176    256    
320    496    
-64    -1296  
-640   -64    
352    -80    
-208   672    
96     -304   
272    48     
240    304    
144    -688   
-384   -256   
32     -32    
256    -256   
-80    -448   
16     0      
112    192    
-224   624    
0      -384   
-192   -896   
-432   464    
-80    464    
400    -80    
-112   -144   
-448   80     
-64    -160   
384    -560   
16     -720   
16     -816   
-736   -1712  
128    176    
160    288    
816    288    
-1072  704    
240    -336   
176    -784   
544    -784   
16     -272   
208    176    
-368   -160   
0      -32    
320    -672   
160    -64    
0      -256   
-128   -352   
96     16     
-16    -1280  
96     176    
64     -336   
-256   -224   
128    -272   
224    96     
112    -512   
-768   208    
560    480    
-112   176    
-272   1456   
-96    48     
-96    -144   
128    -128   
16     96     
112    -528   
-240   224    
-112   -144   
0      320    
288    -96    
320    -112   
-448   -144   
48     -96    
-128   -320   
128    96     
-80    368    
224    192    
416    112    
-272   -496   
64     -96    
-256   -592   
448    16     
-256   -544   
160    80     
112    64     
-960   192    
-768   -64    
2752   416    
448    -160   
-1952  -144   
816    16     
1040   -288   
-864   256    
112    336    
-48    368    
288    16     
-416   -80    
208    -816   
48     176    
16     -16    
-112   48     
304    -48    
-192   208    
-160   -64    
160    96     
64     -96    
48     320    
368    -416   
-1264  256    
1488   -240   
-704   -144   
-96    144    
224    -368   
96     -288   
496    96     
-224   32     
-224   -16    
96     -96    
-384   -112   
96     -112   
-304   -240   
-16    80     
352    160    
-400   -160   
304    32     
-80    -592   
-176   96     
192    -352   
-592   224    
80     -160   
-128   112    
-48    16     
112    -112   
512    48     
480    -208   
-768   160    
-192   64     
144    272    
256    -64    
-80    224    
-384   -192   
-464   -352   
0      -768   
-64    -144   
-256   288    
-1520  112    
-368   240    
400    208    
352    -16    
-192   -176   
-416   32     
512    -272   
-48    16     
-32    -240   
112    240    
-1376  -528   
2976   -560   
-128   64     
-1008  -1264  
480    288    
-112   96     
-48    -240   
-368   256    
512    224    
-256   -128   
-288   272    
-160   -272   
352    256    
32     -144   
144    -16    
-64    -64    
-320   48     
176    48     
400    16     
16     -320   
-1328  -32    
1056   -96    
-592   -64    
288    16     
-208   -112   
-352   80     
-592   240    
848    128    
-384   112    
576    80     
-688   16     
464    144    
-272   144    
224    -144   
-16    -32    
-32    -96    
208    96     
-192   96     
64     208    
-144   64     
48     256    
48     -112   
32     176    
-112   -336   
64     64     
48     0      
0      80     
224    96     
-240   -304   
-336   -112   
224    -64    
-48    64     
96     -560   
-944   288    
320    -416   
48     160    
-176   -32    
-144   32     
-160   -144   
-128   144    
272    -16    
16     32     
-256   -96    
16     64     
96     320    
256    0      
-304   -32    
160    160    
0      -80    
64     -656   
144    224    
-512   80     
64     -128   
-64    -384   
-32    -112   
48     64     
96     -576   
-224   96     
-32    448    
208    240    
48     -48    
1008   1568   
-2384  1664   
1264   -144   
64     -144   
288    -624   
-720   32     
64     896    
-272   64     
16     -416   
176    -224   
-288   272    
-112   16     
288    -96    
-112   -80    
32     -912   
-64    256    
80     80     
-32    176    
80     160    
-144   -224   
-160   336    
640    1344   
-1056  -256   
-848   496    
1360   -432   
-832   816    
80     176    
240    -96    
96     192    
-320   -112   
-16    -112   
48     -688   
96     -128   
-144   128    
-336   304    
368    320    
-48    432    
-112   -64    
0      -240   
-144   -64    
336    64     
96     64     
-144   -48    
-192   -48    
144    -48    
-32    208    
-128   128    
128    64     
-80    64     
-64    48     
272    -1152  
-800   -608   
480    64     
-1024  64     
1104   112    
480    32     
-240   192    
-352   -80    
-32    368    
320    432    
-32    592    
-224   48     
320    0      
-512   -608   
-80    112    
192    -32    
-208   144    
256    480    
240    288    
-16    384    
-64    144    
-576   -176   
2416   -352   
-1232  80     
-736   -256   
1280   160    
176    752    
-496   1168   
-96    960    
416    544    
-224   368    
256    -32    
0      -48    
-128   128    
160    416    
64     160    
160    80     
-432   192    
464    -224   
-48    -256   
-240   64     
336    64     
-32    240    
-128   -512   
-208   192    
1120   1088   
-688   1040   
-304   -80    
-64    -256   
32     -288   
-64    -80    
464    0      
-272   464    
752    1104   
-960   464    
-464   -272   
352    192    
-192   496    
176    192    
368    -272   
-288   -160   
528    -112   
64     0      
-176   304    
-272   96     
320    -16    
0      -240   
16     32     
352    16     
-48    112    
-656   -1136  
1360   -2288  
272    464    
-208   240    
-448   208    
-352   576    
864    960    
64     1968   
-512   -944   
96     512    
368    96     
288    128    
128    -160   
-240   64     
32     144    
560    160    
-96    -64    
464    -112   
-144   -608   
-160   -688   
240    176    
-16    384    
-112   -160   
64     144    
192    -224   
-224   -64    
320    400    
192    144    
-496   848    
32     336    
80     -272   
80     -16    
96     -256   
-192   -48    
96     -144   
352    -80    
-48    -3472  
-208   -720   
112    -880   
144    -1072  
-336   272    
64     336    
-32    -160   
368    -16    
-384   320    
128    544    
-48    160    
-64    -1312  
80     864    
208    448    
-208   -160   
304    -752   
-864   640    
880    1184   
464    1248   
-640   1200   
576    -64    
-48    752    
-16    -224   
-48    16     
416    1376   
144    752    
-64    -624   
-112   -48    
80     160    
96     32     
-80    -368   
-96    -272   
-240   -3296  
96     656    
320    400    
-160   -48    
112    16     
16     -48    
0      304    
64     784    
32     416    
384    256    
-608   0      
-128   -128   
352    208    
704    1664   
672    -96    
-1040  -784   
-128   1264   
480    1152   
192    848    
-256   -32    
64     320    
0      -48    
128    -592   
256    -80    
-80    64     
-112   576    
48     -640   
272    176    
-336   32     
-192   144    
208    64     
160    176    
-32    -32    
-224   -784   
96     304    
352    560    
-336   -80    
384    -400   
-512   1008   
320    -288   
-208   576    
-16    160    
-112   -48    
80     -64    
240    16     
-64    48     
160    144    
80     112    
-224   48     
-80    -176   
32     144    
304    -16    
-272   -80    
-16    160    
176    -304   
-192   64     
608    -224   
-560   -32    
48     -16    
80     144    
176    -432   
144    -176   
192    -656   
-1808  -1552  
1088   96     
608    -912   
-576   -400   
-416   368    
480    -688   
-112   352    
-352   -720   
384    288    
112    0      
-368   -96    
272    -32    
-144   -16    
576    -240   
-304   192    
80     -256   
224    224    
-128   -160   
144    -368   
-48    -112   
-48    -160   
-1424  672    
1344   -16    
-816   -128   
304    -848   
192    272    
192    -528   
-288   -96    
-48    -336   
240    96     
432    -192   
-112   112    
-336   -128   
-32    32     
-368   16     
160    -16    
16     400    
0      128    
-352   -320   
-16    -448   
352    -32    
256    -112   
-336   -80    
432    -64    
848    -48    
-704   -704   
592    -432   
656    160    
-432   224    
-32    160    
400    -208   
128    -224   
16     -512   
144    176    
-48    -32    
144    160    
368    -992   
144    160    
-400   -16    
-96    224    
416    32     
48     160    
-320   128    
16     -128   
-240   -304   
240    -336   
-240   -240   
-272   -144   
400    560    
-1200  -3360  
-1008  288    
1616   -1648  
-1936  112    
1056   144    
592    128    
-304   544    
336    -96    
-544   -48    
-144   -48    
176    112    
176    -144   
-448   192    
64     -80    
-192   128    
384    -48    
-336   128    
64     -528   
-64    16     
560    -1040  
-288   272    
480    -80    
-448   -48    
-496   -112   
288    -32    
-112   80     
0      -96    
240    0      
64     -352   
-768   -80    
-160   -288   
272    0      
0      -144   
272    48     
-336   -80    
304    -48    
-64    -80    
272    -320   
-368   -32    
-16    160    
80     48     
-224   -96    
-208   -16    
304    -160   
-432   -96    
96     -128   
272    96     
32     -336   
-432   -160   
432    -320   
-48    -208   
-80    -976   
-320   -32    
176    0      
-656   -32    
608    32     
240    656    
-672   912    
176    336    
176    -32    
-80    -48    
64     64     
0      -352   
-16    -48    
304    -304   
-48    128    
-64    352    
208    96     
16     416    
-96    416    
224    368    
-160   208    
48     176    
416    464    
-144   96     
-640   -592   
-336   80     
624    -128   
128    192    
-96    128    
-896   -976   
544    -2400  
-912   384    
1312   288    
-464   -112   
-400   0      
-160   -304   
320    160    
320    -832   
-352   16     
-272   -320   
176    192    
-64    -112   
-80    -128   
80     240    
176    -16    
-176   16     
-48    320    
-64    0      
96     192    
-384   -64    
576    -336   
-720   224    
16     -416   
-272   800    
-48    -448   
256    -16    
-224   -64    
-80    32     
-48    -64    
-64    352    
208    -256   
-112   -32    
-320   -528   
96     448    
-16    256    
-1056  144    
352    -688   
32     592    
-192   176    
112    -304   
192    160    
0      -272   
-80    -112   
-48    -224   
0      432    
192    176    
-336   80     
-208   -224   
304    -192   
1120   -448   
-3360  224    
-208   -80    
1152   -1104  
-752   -544   
-288   -16    
-464   -832   
256    544    
96     -128   
256    512    
-64    -64    
-368   208    
192    128    
64     176    
-16    -144   
-128   224    
-176   -208   
240    -192   
-528   -240   
-192   96     
-80    -208   
560    720    
1504   -112   
-1568  288    
0      784    
288    416    
240    416    
208    2096   
576    224    
-880   -1760  
-48    -896   
352    240    
-112   528    
-800   -256   
-16    -192   
-64    -352   
16     32     
64     -96    
-464   -64    
32     -112   
-64    -336   
64     -112   
160    208    
-144   64     
-560   64     
896    -336   
416    736    
-1136  1472   
64     800    
-192   144    
560    -112   
-80    160    
-400   352    
976    -32    
-16    -592   
576    0      
-224   -32    
384    896    
576    -752   
-528   -176   
160    320    
-32    208    
288    -96    
240    -528   
-224   736    
240    -480   
-320   -112   
16     160    
48     -112   
240    96     
-496   -704   
1328   -1520  
-192   -416   
32     -144   
-848   -1264  
-336   -1408  
400    -608   
528    928    
176    32     
-400   240    
-224   -320   
208    208    
400    464    
-64    688    
-224   -544   
-112   -224   
64     -16    
32     176    
16     480    
-144   736    
176    432    
32     0      
-272   -336   
-368   352    
416    -960   
-576   96     
176    -48    
-224   160    
256    928    
80     1200   
208    880    
-64    -320   
160    -816   
-48    64     
-80    304    
-352   48     
368    16     
32     320    
-48    128    
64     432    
96     -16    
-112   96     
-16    -176   
-48    -224   
224    -576   
-816   -672   
96     -256   
224    -528   
-320   -432   
-32    -240   
-16    272    
144    -192   
-960   176    
656    752    
528    16     
-384   -80    
-272   -384   
304    -384   
-112   -240   
80     1040   
-352   848    
192    640    
368    -48    
-368   368    
-176   0      
112    -256   
272    368    
-224   400    
240    1072   
-128   912    
112    608    
352    0      
-144   -112   
-176   -112   
48     -176   
48     -608   
288    -944   
-464   -880   
112    -1168  
96     -368   
-576   -944   
1328   -560   
-544   1024   
16     -592   
64     368    
-144   -32    
608    304    
16     256    
112    80     
-272   192    
-32    96     
336    -112   
64     -144   
-112   336    
-32    -240   
64     240    
-16    -480   
80     -608   
80     272    
-176   112    
288    0      
848    528    
-2032  176    
752    336    
352    -208   
-1088  16     
880    -224   
-320   144    
64     -208   
-320   208    
528    288    
96     144    
-224   -208   
-64    96     
112    320    
-160   -96    
48     -64    
256    80     
-128   64     
-48    48     
96     128    
384    112    
-384   -176   
192    80     
-80    32     
176    80     
64     128    
-48    -176   
256    48     
-208   -528   
1296   64     
-2032  -224   
1056   -544   
-224   -192   
-208   -16    
1536   -272   
-1376  608    
176    304    
128    624    
112    -176   
304    -64    
-368   0      
-96    -96    
208    16     
576    -400   
-720   -32    
400    304    
-224   112    
144    176    
32     80     
-192   -16    
368    -32    
720    -208   
-1728  -96    
1504   -96    
-416   -208   
-496   160    
576    -64    
-144   400    
240    -336   
32     16     
-240   -1472  
0      80     
128    80     
32     128    
48     32     
-112   192    
96     -192   
336    -160   
-208   64     
-32    -240   
464    288    
-144   224    
432    160    
-432   -128   
0      -16    
384    64     
0      352    
-176   -224   
-480   288    
544    144    
80     128    
-400   144    
-64    -48    
240    240    
-384   -736   
480    160    
128    -208   
320    624    
400    -336   
-32    272    
-128   32     
-176   80     
48     -48    
128    96     
96     -112   
-448   112    
176    144    
80     -224   
144    272    
-1264  -1888  
2336   -2960  
112    752    
-608   320    
-128   128    
-176   160    
-16    96     
608    272    
128    464    
-688   352    
16     112    
800    -128   
-352   112    
16     -64    
16     -1888  
208    -112   
-96    96     
96     -96    
-288   96     
-128   -80    
608    368    
-400   288    
48     -288   
256    -64    
208    -1056  
-304   208    
368    -128   
-560   48     
848    208    
-224   -64    
-112   -160   
320    -1200  
-48    192    
-160   -176   
192    288    
320    416    
-368   128    
64     0      
-208   160    
336    -192   
0      64     
-736   -48    
224    160    
176    48     
112    -368   
112    -656   
240    288    
-208   752    
240    -464   
128    -48    
-208   128    
160    192    
352    512    
224    448    
-144   -48    
176    112    
-304   464    
80     752    
-240   400    
256    112    
80     160    
-320   -112   
160    80     
224    -544   
-128   96     
192    656    
-448   608    
352    272    
400    944    
48     880    
-176   -720   
-176   -16    
384    256    
-32    144    
-96    -112   
16     -16    
80     64     
384    -144   
-176   32     
96     -608   
-32    -960   
384    1152   
-544   32     
-80    0      
864    1104   
-112   672    
-816   -208   
-112   96     
576    1200   
-320   -272   
-848   -32    
80     304    
-80    -240   
192    240    
-48    -208   
-224   -208   
16     80     
224    -256   
112    64     
-96    368    
32     288    
176    736    
-160   64     
-192   -208   
496    256    
-496   128    
-208   -192   
64     -96    
288    -96    
0      80     
-32    -608   
-16    176    
96     -464   
48     -32    
-32    0      
-96    224    
256    192    
-432   288    
-192   -160   
528    16     
-320   -160   
-352   -320   
-320   32     
352    -544   
80     112    
32     -400   
-208   144    
240    -688   
384    128    
-160   -32    
-288   80     
-1072  -1504  
384    160    
-240   -464   
-608   -224   
464    112    
496    -288   
240    -224   
-688   -880   
-96    384    
288    320    
160    656    
-272   -560   
32     -352   
-32    96     
-32    80     
-160   48     
128    -80    
112    -752   
-368   -288   
48     896    
-224   -976   
1472   1008   
-1584  -48    
368    304    
-80    320    
-608   368    
96     -784   
608    -2144  
-464   -976   
-240   512    
256    1072   
-64    832    
-64    432    
464    112    
-128   -208   
-128   -192   
-144   -400   
-160   -736   
-144   0      
-496   -16    
112    272    
-80    -48    
32     -112   
96     -128   
-432   256    
-304   560    
-592   464    
544    1424   
-288   1648   
-416   512    
-576   -176   
-176   0      
-304   -336   
672    192    
-64    -48    
-336   192    
224    -832   
976    -1376  
272    -96    
16     208    
-48    416    
-640   16     
432    752    
-976   768    
112    368    
-336   48     
224    -128   
112    288    
-336   736    
-48    80     
-464   -2944  
-800   -672   
352    16     
16     -368   
480    -640   
-960   224    
32     112    
64     1008   
-176   240    
-16    -192   
-480   32     
-64    32     
432    208    
208    16     
-480   -16    
-384   208    
368    96     
336    32     
368    160    
-752   -640   
32     -240   
128    -448   
-272   432    
576    -16    
-736   48     
-368   -64    
464    64     
-96    -192   
-112   256    
-144   -608   
-496   -272   
288    -256   
16     -48    
256    -176   
-16    -64    
-304   -64    
-128   -320   
208    96     
-400   -32    
144    208    
-752   -192   
112    16     
-144   -288   
0      0      
416    192    
-416   320    
176    704    
240    496    
-720   16     
96     -32    
112    -64    
-480   16     
512    -80    
-96    -384   
-144   -16    
160    -32    
-192   192    
240    176    
96     96     
-128   128    
-32    144    
32     288    
64     208    
-160   320    
128    144    
144    192    
-176   80     
96     -80    
144    -224   
-752   416    
352    -208   
48     192    
-128   32     
-96    48     
-160   -240   
656    288    
368    368    
-336   -128   
48     272    
-48    -96    
1440   2576   
-3104  -64    
-720   240    
1760   -96    
-720   -96    
-240   -208   
400    -112   
-48    288    
-112   80     
176    32     
-112   144    
-320   352    
368    -80    
-128   -272   
-112   -96    
48     240    
-480   96     
336    16     
-176   32     
144    240    
-576   -816   
1024   -288   
-800   208    
-192   -48    
-48    176    
-176   160    
112    288    
16     240    
32     -320   
-240   176    
0      64     
-224   128    
320    176    
400    48     
-672   128    
-32    -144   
112    112    
112    176    
-208   32     
48     224    
112    0      
-112   128    
-16    -16    
-96    16     
416    144    
-336   0      
-128   272    
416    16     
-416   -48    
208    -480   
128    -288   
-32    -128   
336    -112   
-528   48     
320    208    
352    0      
-480   192    
208    -272   
0      0      
-352   96     
304    144    
16     48     
-32    32     
-176   128    
416    160    
-432   144    
272    80     
176    48     
-208   -96    
304    144    
-64    304    
-304   96     
1984   -112   
-896   16     
32     208    
912    176    
-576   80     
16     176    
624    -48    
-112   176    
-432   32     
112    160    
400    96     
-416   32     
256    160    
-112   176    
128    -16    
64     128    
-112   -16    
16     80     
-160   224    
448    784    
-480   48     
-752   224    
576    -144   
160    96     
-224   32     
0      -384   
-1088  576    
864    -80    
-336   -80    
-16    80     
0      48     
0      96     
-96    -128   
240    112    
-160   192    
192    128    
128    -128   
112    -256   
-48    160    
-144   80     
464    112    
-64    128    
-256   -16    
368    224    
336    80     
128    32     
-192   128    
-832   -304   
1648   864    
1280   -336   
-1840  48     
-304   64     
352    -80    
576    256    
-176   -352   
-544   288    
592    80     
-384   256    
144    -48    
272    192    
-192   -112   
80     256    
368    176    
-160   128    
-352   112    
400    -256   
-592   -112   
304    176    
16     416    
160    -624   
-560   -16    
320    32     
80     -48    
-352   432    
512    64     
-464   -48    
176    48     
64     -64    
144    256    
-80    192    
-240   32     
64     -464   
240    -176   
160    -80    
-896   -1168  
48     -448   
368    -1568  
-256   -224   
0      -576   
-64    -320   
-80    -224   
16     -176   
320    -464   
80     -352   
16     272    
-496   -592   
320    -592   
144    512    
-192   672    
464    -176   
112    336    
-48    -448   
-16    -64    
-304   -272   
624    -176   
64     -1456  
-224   -944   
240    256    
-224   496    
80     -16    
64     -16    
144    32     
-512   -672   
272    80     
240    16     
-16    336    
128    -208   
-176   544    
208    0      
48     176    
-64    16     
48     -192   
-224   0      
272    -688   
32     112    
-176   96     
160    160    
32     -160   
-624   -144   
880    -784   
-176   432    
336    -624   
-496   288    
256    32     
64     32     
96     192    
80     0      
-176   -64    
-32    80     
160    144    
16     16     
128    144    
-128   -64    
352    48     
-112   96     
112    32     
0      -80    
48     128    
320    -400   
-1104  -992   
448    192    
-96    -672   
464    -656   
-48    -48    
-160   -912   
0      -240   
80     -1520  
336    16     
-208   144    
-128   -176   
256    144    
-144   -208   
16     -1440  
208    176    
224    -1216  
-128   -512   
192    -384   
80     0      
48     -112   
-176   -688   
208    -224   
304    -336   
16     -336   
-288   -528   
48     176    
32     64     
-176   320    
272    -432   
-1424  1392   
2944   -384   
-352   80     
-1104  336    
704    112    
-48    400    
-656   -112   
-448   -1328  
368    336    
-192   48     
160    -928   
112    -80    
-224   96     
208    -144   
288    -48    
-320   0      
48     352    
-96    -336   
128    -960   
-80    -576   
80     48     
-1792  1056   
1232   272    
-240   -272   
-528   176    
672    -896   
0      1344   
-368   -1072  
-448   672    
784    688    
-192   576    
32     -192   
128    144    
-480   112    
128    -144   
32     -240   
128    512    
-80    -192   
-288   -208   
176    -208   
320    -32    
-304   32     
-368   -1008  
512    880    
192    544    
-224   192    
-848   160    
416    48     
-368   416    
352    192    
-304   -176   
-288   -384   
-496   32     
400    64     
-48    624    
480    -208   
-96    -112   
672    -736   
-128   -144   
-272   32     
208    208    
-272   80     
480    736    
-496   224    
16     0      
-304   -224   
-176   32     
48     -128   
-448   -656   
-528   -944   
944    1248   
96     -144   
-1184  -304   
-384   16     
352    -160   
864    48     
-912   -16    
272    208    
-464   80     
640    144    
-240   -96    
-144   112    
160    144    
-432   64     
352    -16    
-16    -112   
32     16     
224    -112   
-336   1072   
784    1232   
-192   240    
-512   -320   
576    -192   
-48    -64    
0      128    
176    48     
32     272    
80     -192   
-160   -16    
-112   80     
320    96     
48     240    
-400   -368   
352    -112   
-528   -224   
416    -160   
-512   -112   
64     -176   
-112   112    
112    64     
-112   -128   
-32    -176   
-352   96     
240    16     
-192   272    
512    -384   
-608   48     
-880   -400   
208    432    
160    224    
-544   240    
-256   -384   
-16    -176   
-256   -16    
288    -32    
-304   112    
336    -96    
-272   160    
-304   -96    
-176   128    
128    -96    
32     128    
-96    -304   
-304   -80    
-32    32     
-144   144    
-16    464    
320    288    
-224   -432   
-1440  112    
464    176    
-272   48     
-48    144    
128    -144   
-192   32     
80     -528   
192    384    
-352   288    
80     -192   
48     0      
1104   480    
-3776  1376   
640    240    
880    32     
-1040  -368   
192    -192   
-400   -352   
-320   96     
48     128    
288    -64    
-336   -160   
-128   224    
96     80     
288    224    
-528   -176   
-48    -144   
320    176    
-272   32     
304    -192   
-16    304    
-176   -528   
32     -848   
-784   496    
640    -96    
128    288    
-560   -144   
240    128    
432    544    
-16    -176   
-208   192    
80     176    
144    256    
48     208    
-304   16     
-128   -32    
192    -128   
160    -256   
-608   0      
256    -80    
-144   272    
240    -48    
-96    224    
-32    0      
-96    80     
400    160    
-480   96     
-64    32     
-96    96     
240    32     
-576   -240   
208    1040   
128    -480   
-448   -80    
-352   -368   
160    288    
-16    -64    
-160   624    
-48    336    
-112   144    
-176   -16    
144    -32    
-32    64     
16     32     
80     -160   
-672   -32    
560    96     
-384   0      
272    96     
288    112    
-96    128    
64     176    
-672   -112   
912    96     
480    -400   
-1152  -80    
688    208    
288    48     
-400   -48    
-336   -32    
496    -48    
48     176    
-160   -112   
208    128    
-368   -64    
-112   -32    
352    128    
-16    80     
-176   -176   
96     160    
0      160    
-32    32     
-64    -160   
624    288    
-144   -448   
-512   160    
864    128    
-960   16     
48     160    
672    -128   
-544   240    
-48    -16    
176    64     
160    96     
48     -96    
-128   0      
-288   -64    
160    -304   
80     288    
128    -80    
-384   0      
224    48     
224    624    
-304   0      
-416   48     
288    0      
288    368    
-160   96     
-192   -32    
-128   224    
624    1200   
240    -2256  
-1808  -560   
1184   336    
96     224    
576    128    
-256   352    
-96    592    
-704   800    
432    -304   
416    208    
-80    32     
-400   -48    
176    320    
112    144    
32     32     
32     -176   
-64    256    
-192   -144   
-144   -288   
544    -864   
-320   -288   
-272   -144   
-112   384    
896    -48    
-704   -16    
-176   -48    
160    -480   
-224   -784   
16     -832   
-32    112    
128    96     
-64    32     
336    96     
-16    480    
-208   480    
160    224    
-16    192    
64     160    
128    -544   
-112   -48    
144    672    
112    64     
128    128    
368    384    
-896   -864   
96     -400   
96     -80    
64     144    
160    480    
-352   -160   
176    240    
432    448    
-1312  336    
672    400    
176    1184   
-432   0      
-16    -112   
-272   688    
80     -80    
208    304    
-128   -160   
32     96     
-128   32     
176    80     
-480   48     
-160   80     
448    -80    
-32    -288   
-144   48     
336    -176   
176    208    
-48    80     
-48    128    
160    80     
-192   128    
0      96     
336    -16    
-80    -64    
112    16     
144    112    
16     112    
-592   256    
928    -544   
-864   208    
640    -48    
-208   336    
128    80     
128    -144   
384    -432   
112    240    
96     160    
16     -64    
48     0      
-32    -80    
256    48     
64     -48    
-240   0      
96     -272   
-48    32     
112    -1312  
32     224    
224    720    
496    -64    
-864   48     
240    80     
256    208    
-112   -80    
-112   -464   
224    288    
-80    144    
-128   0      
0      -128   
432    -464   
64     16     
-80    -800   
64     112    
80     -320   
48     -32    
-64    -960   
128    -288   
112    -64    
0      128    
-32    -64    
416    32     
-160   -80    
64     64     
96     464    
-288   -16    
400    432    
32     32     
1392   1552   
-1552  784    
-832   -288   
1760   -112   
-560   -640   
-1440  -704   
0      336    
336    -256   
336    -64    
64     608    
32     976    
-224   816    
512    -16    
176    64     
-112   -656   
-384   -80    
128    -496   
400    144    
-144   176    
-272   432    
256    112    
-736   -208   
1936   -368   
-704   -1216  
320    1632   
1312   -32    
-672   208    
1168   160    
-912   576    
-32    -48    
496    80     
-16    -816   
-176   192    
-224   -384   
128    -144   
432    192    
-208   112    
-144   -32    
112    -112   
48     128    
208    -272   
-96    128    
-96    -496   
800    128    
-544   32     
112    -112   
512    64     
-832   288    
96     -336   
16     192    
368    448    
-256   240    
-192   -240   
0      -400   
-64    0      
288    -80    
384    -432   
64     528    
208    48     
-800   -80    
144    128    
192    -112   
240    -128   
48     192    
48     -1136  
64     80     
352    -1216  
48     -336   
-208   -80    
64     -352   
1056   -1072  
-2416  -256   
608    -64    
864    -96    
288    -224   
-240   -48    
-464   -208   
432    192    
0      -176   
400    -112   
-112   -176   
0      208    
48     -288   
-64    288    
208    -432   
16     336    
-128   -464   
160    112    
304    -1024  
-64    16     
-144   16     
544    -80    
-352   64     
-704   -48    
240    64     
816    48     
-736   368    
416    -96    
0      16     
336    -352   
-48    32     
16     -192   
224    -112   
-112   -624   
288    112    
144    -256   
-128   112    
400    -240   
-352   240    
688    32     
-400   16     
128    32     
416    32     
-464   80     
368    192    
-400   16     
576    32     
-64    -80    
-160   -608   
272    -80    
192    -1328  
336    1136   
-544   192    
-112   400    
992    -240   
-784   -64    
-112   16     
400    -16    
128    0      
112    -32    
144    96     
112    -112   
-32    64     
32     64     
208    16     
-80    -32    
96     1168   
160    736    
-304   224    
560    -400   
-288   -48    
-288   64     
480    208    
112    -48    
-160   -256   
-768   -112   
320    -560   
-480   -272   
-320   208    
144    176    
-480   -2256  
2208   112    
-1264  768    
-112   48     
320    144    
-800   64     
288    944    
960    -16    
-672   -1104  
48     16     
-192   192    
192    -144   
160    240    
-192   -96    
-112   -336   
224    0      
288    256    
16     -576   
-272   -80    
16     112    
256    80     
64     1408   
944    -528   
-1200  -176   
192    64     
16     0      
160    64     
352    272    
-16    -32    
-336   -272   
192    -208   
352    48     
-224   -160   
336    -160   
-144   -80    
16     -160   
144    -128   
-400   0      
384    64     
144    176    
-64    16     
-96    -16    
-576   -64    
-192   -112   
352    -144   
-208   -48    
320    -32    
-320   304    
32     -16    
-96    240    
1040   -800   
-3424  1104   
624    544    
1424   -336   
-1840  -704   
128    -400   
880    -48    
-784   -320   
64     112    
48     -64    
-272   16     
-16    80     
-192   112    
-656   144    
-208   208    
-784   224    
512    16     
-832   96     
-16    256    
-384   272    
224    288    
-608   -704   
336    32     
576    -352   
-1424  -384   
-48    192    
368    -32    
80     -128   
-560   0      
80     0      
-112   -80    
272    448    
-1120  -320   
-400   144    
128    -336   
0      128    
224    -128   
-464   -48    
112    -400   
16     224    
-96    -144   
48     96     
112    240    
512    -336   
336    192    
-368   112    
-736   -1120  
-96    384    
448    -96    
-608   112    
832    -80    
-192   -256   
144    336    
-112   -16    
-48    304    
544    400    
400    272    
-592   -560   
-256   336    
560    544    
-576   96     
-208   96     
256    -16    
-96    -208   
-288   112    
-160   -320   
-144   -160   
144    128    
-336   -176   
432    -208   
1312   2576   
-1680  1792   
304    -992   
1248   128    
-896   304    
-512   304    
560    32     
288    -912   
-416   944    
240    736    
-16    240    
-352   128    
96     48     
0      160    
-112   -464   
-288   -752   
336    96     
160    0      
-128   144    
80     240    
-144   -128   
32     -176   
-336   -176   
848    112    
-736   -160   
208    560    
-416   80     
368    -144   
-208   -560   
-112   -96    
-304   -304   
128    416    
176    688    
192    704    
-560   -48    
-96    -880   
16     -304   
48     -192   
464    1216   
-512   -224   
0      0      
64     -48    
96     432    
-144   -160   
272    -480   
-80    400    
144    256    
112    800    
-400   -400   
192    -48    
-32    32     
128    1264   
1296   -528   
-848   224    
256    336    
-352   944    
400    384    
-416   -1152  
336    -1184  
208    -768   
-144   16     
-160   112    
80     544    
160    432    
-256   448    
48     144    
-176   64     
224    -96    
208    176    
-32    -48    
240    112    
-192   16     
224    -16    
-144   192    
-64    192    
96     -16    
-448   64     
224    96     
-32    16     
144    0      
-176   32     
-480   -288   
624    -416   
-896   224    
416    -272   
352    32     
176    -176   
-272   -224   
320    -640   
272    -256   
208    176    
64     336    
-144   240    
-208   -80    
192    -64    
-32    -192   
-80    160    
-16    288    
240    336    
-256   256    
-112   480    
528    -496   
-224   400    
704    -32    
-688   -160   
-80    176    
16     -272   
304    -720   
304    448    
112    -64    
-592   -336   
272    80     
288    464    
112    -208   
32     32     
-528   -272   
176    272    
304    144    
240    112    
-352   128    
-48    -112   
144    -80    
128    176    
272    -288   
-288   -192   
-176   48     
240    -48    
240    128    
-224   -160   
208    -528   
-1040  -1136  
64     400    
784    -400   
-1376  48     
1120   192    
-512   448    
480    288    
-224   624    
-80    448    
64     192    
368    176    
-224   64     
-272   -64    
192    400    
528    240    
-32    288    
-240   304    
128    320    
-32    144    
16     -64    
0      192    
-512   -912   
-112   -160   
528    -256   
144    -64    
-304   128    
432    -48    
-64    -464   
-832   352    
800    128    
-112   -832   
32     208    
48     80     
-256   -32    
256    240    
144    96     
-96    64     
64     320    
-144   -16    
64     64     
336    -112   
80     688    
-928   272    
352    -304   
-160   496    
304    -480   
96     832    
-480   464    
-496   -832   
544    64     
-96    16     
-400   192    
400    176    
112    48     
-64    -624   
288    -864   
-368   160    
528    -80    
448    176    
304    464    
-528   -64    
160    144    
576    -272   
-560   256    
-96    -32    
544    624    
208    -128   
-432   192    
352    64     
-544   -1168  
-1920  -2224  
288    80     
-240   192    
-320   -96    
192    64     
256    64     
-320   0      
-208   -528   
512    480    
-864   -16    
304    96     
400    160    
-400   0      
0      -16    
288    176    
80     -96    
-160   112    
144    80     
480    208    
-1248  112    
1040   0      
0      32     
-496   -864   
-256   176    
-128   -1200  
480    176    
-112   48     
336    -16    
-240   16     
160    240    
-128   128    
352    416    
-336   -96    
16     -112   
-176   96     
608    48     
-416   160    
96     224    
496    0      
-448   160    
432    48     
-624   -32    
256    208    
352    224    
-144   96     
80     96     
160    176    
144    272    
-352   -128   
416    -96    
-368   -320   
144    -176   
-1072  112    
640    -240   
-176   -224   
32     0      
320    272    
240    48     
16     -352   
-160   208    
96     32     
-48    -784   
48     128    
176    -112   
-64    144    
-64    -112   
16     240    
448    -192   
-256   -144   
-96    -496   
512    208    
-16    272    
-160   80     
176    -128   
-144   -2272  
16     -960   
272    -16    
-64    -112   
0      -128   
-32    80     
-352   -1280  
1392   -1696  
-1840  176    
672    -304   
288    -288   
-752   -1536  
304    0      
336    -368   
592    544    
-720   480    
-96    -1392  
304    32     
80     128    
-64    -128   
144    -304   
0      -288   
144    -112   
240    48     
-80    -16    
16     -240   
-112   -112   
624    1856   
528    -208   
-1040  -336   
320    -112   
-128   48     
336    432    
-432   -192   
160    -176   
-112   -160   
112    -144   
240    -1088  
-128   240    
48     -320   
-128   -32    
576    -288   
-272   208    
16     -368   
0      32     
16     -224   
16     0      
-800   -64    
16     -208   
0      -80    
-48    -96    
-160   -32    
448    -224   
-224   80     
160    -304   
-224   -16    
1568   -304   
-2432  784    
768    208    
336    -368   
-624   -112   
528    -352   
-736   -272   
80     -256   
32     128    
112    288    
224    80     
-240   -528   
-16    48     
64     -1648  
352    -32    
-384   -160   
160    96     
-128   32     
208    -16    
-352   -112   
128    112    
-464   -160   
1856   -400   
-1776  320    
96     -480   
160    -256   
272    -384   
-320   432    
-512   -208   
112    -352   
608    -128   
96     80     
-240   -160   
-176   -16    
208    0      
-16    0      
-128   128    
-32    -352   
-720   -240   
176    144    
-224   -16    
176    -48    
-96    0      
-128   -256   
208    32     
-208   -288   
256    -1008  
1104   -608   
-160   -576   
176    368    
336    -208   
-528   -16    
64     -432   
160    640    
-528   624    
-368   112    
288    -768   
-16    -352   
208    -512   
-112   176    
0      -1088  
16     -336   
0      -32    
112    -240   
-352   -48    
-128   -1024  
-688   -288   
-48    -240   
0      -240   
400    -352   
48     32     
0      1600   
1456   288    
-1504  -480   
272    448    
1168   -64    
-544   -848   
-48    512    
-256   64     
416    -496   
96     464    
-48    112    
-288   -240   
-160   144    
352    272    
-64    -208   
208    -224   
-64    96     
304    176    
320    880    
-320   544    
-1088  -880   
-32    128    
160    144    
160    400    
-112   1136   
208    640    
736    -272   
-400   1008   
-256   -272   
240    64     
160    336    
112    -336   
-432   128    
-192   32     
-352   464    
0      304    
224    64     
-704   -704   
0      224    
-496   16     
-176   -240   
288    -224   
-224   304    
-224   -752   
64     -112   
32     384    
-528   -832   
-128   -320   
208    400    
240    400    
80     1120   
-704   208    
-192   672    
544    288    
-272   336    
-208   -16    
-176   -16    
448    304    
16     432    
256    144    
-240   -320   
-128   160    
160    48     
176    32     
-48    -128   
-160   -192   
96     112    
-112   -304   
560    240    
-32    208    
112    -16    
-432   176    
272    -16    
-320   80     
224    608    
32     128    
-256   816    
224    560    
-144   336    
-192   160    
624    -624   
-1744  464    
480    -304   
96     -496   
-256   -624   
-96    -640   
-432   -432   
224    448    
-336   304    
272    -336   
-32    -288   
-160   32     
-112   -192   
224    224    
48     -80    
-16    352    
32     128    
-240   -224   
192    16     
176    -48    
-288   -608   
-496   -32    
32     0      
-304   -1152  
160    -416   
-224   688    
-192   -144   
16     192    
0      -368   
80     -544   
-272   384    
-48    112    
192    -432   
112    208    
-208   -272   
32     208    
64     352    
160    144    
-528   -96    
64     0      
-112   0      
-64    -80    
112    96     
-128   224    
160    208    
272    176    
-288   -80    
0      16     
96     160    
-656   656    
1504   -336   
-1152  656    
832    352    
-80    0      
-1040  0      
736    -128   
112    -384   
-400   -224   
112    80     
-32    -16    
32     144    
0      64     
304    224    
-544   32     
160    192    
160    48     
-272   -224   
-16    -32    
144    -112   
-16    80     
-32    32     
688    768    
1232   -192   
-1520  240    
1120   -16    
-432   80     
-176   16     
464    48     
-864   304    
384    -48    
-256   112    
-176   -80    
224    48     
208    112    
-160   64     
-336   96     
176    -176   
112    -208   
-16    32     
368    -48    
112    16     
-96    416    
848    -160   
-624   160    
80     -208   
208    -144   
-608   208    
-80    80     
704    112    
-80    0      
-656   272    
352    96     
48     208    
-144   -32    
224    -400   
-320   128    
432    -240   
-608   -448   
-80    -256   
736    -224   
320    224    
-528   16     
-128   96     
224    80     
768    -288   
-608   192    
80     -336   
-432   224    
-272   -656   
448    -1824  
2320   -3280  
-656   336    
304    304    
-640   -64    
496    112    
576    -176   
-752   432    
512    224    
-720   80     
176    128    
0      96     
-96    64     
64     96     
-48    64     
96     128    
80     48     
-112   64     
80     64     
-352   -736   
-368   -96    
384    -192   
-464   176    
480    16     
-544   112    
464    112    
-16    -208   
-672   32     
512    -80    
-128   256    
-64    32     
0      144    
-64    48     
160    288    
128    -48    
-656   48     
752    -112   
-816   -80    
192    -736   
-16    192    
96     304    
-240   128    
96     208    
-208   48     
128    320    
96     400    
448    -64    
-576   -16    
320    0      
144    -64    
-160   -144   
16     -64    
368    96     
384    -1280  
-272   -336   
192    -32    
-176   176    
64     -48    
240    -176   
-464   64     
96     96     
80     -96    
80     160    
-128   -48    
48     32     
32     -224   
-112   -208   
224    16     
-16    80     
112    800    
464    240    
-368   -16    
96     -224   
-128   48     
16     240    
240    -64    
16     96     
224    864    
-32    848    
-144   272    
96     80     
-656   -2272  
448    -192   
464    -240   
-1184  1168   
1520   -576   
-496   160    
-304   576    
-48    432    
592    80     
0      208    
-272   432    
-144   320    
80     192    
304    384    
-192   688    
0      -96    
-208   -336   
96     -352   
224    96     
-112   -96    
480    240    
-528   1184   
272    -16    
-208   -384   
-112   192    
288    608    
64     480    
-208   112    
144    368    
32     160    
-16    -272   
64     0      
272    -176   
-192   -32    
208    -576   
64     64     
-320   -832   
160    560    
288    624    
-288   176    
-160   -208   
176    288    
-80    240    
96     -176   
32     -160   
-144   48     
192    -64    
-96    -160   
-112   -144   
-320   -1760  
2256   -128   
-912   896    
-816   -672   
928    -672   
-512   576    
640    272    
-176   416    
96     -528   
144    -336   
-368   144    
240    -1024  
-80    32     
112    -208   
224    288    
-464   208    
320    240    
160    256    
-192   640    
208    384    
64     -416   
-96    -928   
-1232  592    
2032   -240   
-576   -1184  
-464   0      
720    -720   
-224   -592   
-224   -528   
160    128    
272    -688   
-176   -32    
0      -1072  
64     416    
128    -192   
32     -1056  
112    112    
-160   -1680  
128    -1120  
368    -944   
-144   -1824  
-192   -96    
80     208    
-48    336    
272    288    
-144   1232   
16     1008   
144    944    
176    432    
-112   1312   
784    -224   
-432   -160   
-944   560    
496    560    
-64    -560   
-544   336    
-48    48     
0      416    
960    336    
-208   384    
320    192    
-64    112    
-160   224    
16     -624   
160    -16    
0      -256   
224    240    
-112   0      
80     576    
368    544    
-96    -272   
-1120  -1552  
-240   576    
160    -96    
-368   -656   
672    592    
-400   -960   
128    832    
0      1424   
176    112    
704    -304   
-144   272    
16     128    
-32    960    
-656   -784   
352    -160   
160    -16    
48     -288   
-48    208    
128    144    
-16    272    
96     -1184  
144    144    
176    -352   
-688   384    
608    224    
112    416    
-320   320    
-80    -432   
-528   -1344  
320    -288   
128    304    
-128   240    
336    -112   
-80    -832   
-448   112    
400    -2480  
96     80     
-608   -1104  
224    -656   
240    80     
-272   112    
-160   -16    
128    -80    
-480   80     
144    -864   
-960   -688   
-160   -448   
16     320    
48     0      
32     -320   
-192   192    
256    304    
-464   -336   
272    48     
-256   176    
-240   -544   
208    -16    
384    1104   
-112   1040   
160    240    
-352   -592   
0      -416   
320    0      
-112   -240   
32     -32    
64     -320   
-48    -96    
-368   -2448  
256    -64    
240    368    
-96    208    
80     32     
0      -240   
-304   -64    
240    -368   
-704   -208   
160    336    
-192   256    
96     -336   
48     -192   
-960   -1504  
944    -480   
-1040  -1984  
608    -1136  
208    80     
-368   -528   
96     -528   
96     784    
-272   912    
0      608    
336    336    
-208   208    
128    16     
192    -576   
144    -80    
160    128    
144    464    
-432   288    
128    208    
128    80     
-96    -800   
-80    448    
256    -32    
-512   544    
576    304    
-208   624    
208    48     
-336   -352   
-544   -128   
272    -160   
-208   -112   
-48    320    
176    64     
-816   -128   
144    32     
96     -160   
-96    288    
-144   -224   
96     96     
224    -176   
-320   -16    
-240   -288   
-192   32     
0      -208   
-144   -224   
-656   -320   
480    128    
-208   80     
-32    112    
1888   2128   
-592   -576   
-2992  480    
2144   -48    
656    304    
-1376  -352   
-128   320    
992    16     
-640   48     
-64    -256   
208    128    
-224   16     
112    48     
-32    -32    
-576   -144   
128    112    
-32    96     
-128   16     
-32    -64    
288    64     
-192   -160   
208    32     
1088   480    
-1648  176    
-176   -1024  
608    176    
160    -16    
-800   304    
736    176    
-208   -64    
-144   -144   
-32    96     
-64    32     
-288   0      
-256   304    
816    -128   
-528   208    
112    480    
256    112    
-256   64     
144    64     
-16    224    
-464   -592   
496    704    
-208   -48    
-1168  272    
912    -624   
-672   -272   
384    -48    
80     448    
-464   -336   
-416   64     
208    -96    
464    -160   
-80    304    
-608   -208   
320    -384   
-32    592    
-512   192    
64     -336   
0      80     
-320   -32    
208    96     
304    80     
-112   80     
176    -16    
-1008  448    
-368   -144   
192    112    
-128   -368   
832    4896   
720    768    
-1360  -784   
1872   -736   
224    320    
-1312  704    
80     16     
768    80     
-192   -320   
-480   128    
-176   112    
-144   144    
-112   -80    
-128   0      
-48    96     
-352   112    
560    96     
-128   -32    
112    144    
-432   -560   
-128   64     
272    -256   
-368   192    
672    -80    
-352   -32    
-64    64     
256    -16    
-320   -16    
352    48     
-720   80     
432    -80    
-80    208    
144    192    
-400   96     
96     240    
208    304    
-96    320    
-96    384    
-352   336    
16     32     
0      -128   
-96    64     
-224   -240   
-464   384    
304    512    
64     240    
-224   32     
-128   -96    
288    192    
0      64     
-224   144    
128    208    
208    656    
448    -80    
-352   352    
496    368    
-192   480    
-64    144    
224    -80    
-48    -144   
-416   160    
32     -16    
0      -32    
96     48     
192    16     
48     192    
-32    208    
-224   288    
80     -48    
-32    144    
-32    176    
-208   448    
640    688    
-48    752    
-448   592    
48     -48    
-128   -96    
544    -384   
-128   0      
48     432    
-176   320    
576    -752   
-1504  1488   
1504   -640   
-48    -320   
-592   512    
224    -144   
80     1856   
128    176    
-176   128    
240    288    
-144   -80    
-16    0      
96     64     
64     -80    
-176   160    
224    240    
96     208    
-240   -176   
160    256    
-16    128    
592    272    
-1328  1152   
656    -704   
320    -1008  
0      -176   
-16    352    
48     -96    
496    464    
80     -32    
-16    352    
-16    -224   
32     64     
32     64     
-16    -80    
-224   208    
-32    0      
0      416    
480    64     
-320   -896   
-192   -176   
368    432    
144    96     
-112   368    
16     -64    
-32    112    
-16    304    
96     336    
-64    -320   
16     256    
192    64     
-1184  -3168  
-16    1296   
1520   -688   
-1008  -880   
496    32     
576    -384   
-544   816    
48     48     
272    -80    
-32    400    
-320   -272   
48     -32    
-64    -128   
112    48     
224    160    
0      -576   
-128   224    
208    -128   
560    256    
-176   112    
592    1312   
-768   -592   
-256   592    
736    928    
-448   912    
320    464    
-208   -528   
-416   -400   
528    816    
-80    1200   
-128   -336   
16     -656   
80     -128   
-160   240    
272    -528   
-288   -128   
192    144    
-304   -288   
-400   272    
416    160    
-96    16     
-64    -96    
288    -512   
-640   -944   
-416   -720   
400    -720   
-288   -976   
1056   -2560  
-64    -1280  
48     -192   
80     480    
-400   -192   
96     576    
-448   -176   
1072   -640   
-432   176    
128    -336   
160    -464   
-336   -608   
576    -416   
-160   -240   
0      320    
-80    -560   
-16    224    
112    -208   
-128   192    
-32    32     
192    736    
320    576    
-208   416    
928    880    
-2128  -544   
1088   448    
256    -608   
-576   192    
-96    304    
-256   192    
1024   1616   
128    112    
-672   -976   
-48    16     
416    560    
160    160    
-192   560    
-352   -64    
-352   336    
544    240    
-128   64     
-176   -336   
-752   -944   
416    -928   
352    -208   
-480   -272   
208    400    
-48    752    
-32    -368   
480    -848   
0      -256   
-96    -80    
48     -96    
-32    288    
336    160    
-128   96     
96     -208   
240    528    
0      448    
0      112    
-16    144    
96     576    
96     464    
-80    320    
144    16     
-32    -64    
288    -64    
-80    -288   
160    288    
-176   -176   
160    -432   
-32    -240   
-176   432    
208    240    
-272   -784   
-80    0      
896    288    
-400   272    
208    400    
64     -208   
-416   -432   
128    -352   
-784   -208   
464    -1072  
16     -320   
-80    -592   
-80    -480   
176    -1344  
32     320    
-32    368    
16     192    
-80    -256   
-128   16     
-144   0      
16     -96    
32     -496   
48     -80    
-144   144    
256    96     
-720   176    
80     -128   
416    -192   
-80    -256   
512    1712   
-1200  -1856  
112    -256   
1264   -192   
-496   -16    
-160   64     
0      -32    
576    48     
-400   -608   
-176   0      
144    0      
-704   80     
448    -80    
-144   -64    
-64    -768   
-48    0      
-224   -400   
400    -96    
-288   -208   
224    -272   
-64    64     
624    1504   
192    -112   
-784   -144   
720    -48    
-224   -384   
-1104  -64    
64     112    
176    0      
-288   -272   
64     96     
176    -64    
-64    112    
208    -2048  
-128   80     
-64    -160   
272    -64    
-192   -112   
160    320    
-224   32     
-160   -144   
144    -96    
-48    -48    
-240   48     
-192   80     
640    32     
-624   -400   
400    112    
-16    -816   
-160   256    
-304   1040   
384    1536   
-432   304    
48     -368   
352    -64    
-1072  -160   
1408   16     
48     96     
-832   48     
304    32     
256    128    
-272   -464   
352    144    
-96    -816   
-368   -64    
448    96     
32     -32    
-256   -32    
288    -128   
-80    -192   
-112   32     
64     112    
-1472  -112   
496    -48    
224    -448   
-2432  96     
1632   -272   
-368   -224   
-320   -416   
496    240    
16     -2944  
112    80     
-16    16     
-80    64     
-272   48     
-288   48     
272    -144   
-32    64     
-320   -160   
352    -272   
256    16     
-176   -320   
800    576    
576    -432   
-848   128    
656    -160   
-464   -128   
-544   608    
-368   672    
400    -400   
0      -400   
336    -16    
-48    336    
64     80     
368    464    
-288   -48    
-304   32     
448    -112   
-592   -192   
496    464    
-160   -32    
-144   0      
224    64     
-112   -48    
-80    -64    
224    144    
304    -240   
-304   48     
192    32     
-496   -1120  
128    -5904  
-2288  -1808  
1360   640    
-112   -192   
64     208    
-304   -128   
-288   288    
272    160    
-432   -304   
464    -80    
0      0      
-176   80     
304    80     
-272   176    
304    -224   
48     272    
16     -64    
-288   112    
-208   -592   
336    -1392  
-96    -800   
-320   -176   
-112   352    
-848   -128   
464    192    
-448   -192   
-144   16     
240    112    
-272   192    
96     432    
208    128    
-16    80     
-80    128    
48     176    
192    96     
-656   -240   
464    -672   
0      -576   
-128   -16    
0      192    
-656   -112   
432    544    
-704   -64    
304    -16    
320    -32    
-384   96     
256    -272   
-32    0      
-128   -48    
0      -480   
-240   -416   
512    224    
-976   256    
640    -240   
-544   -32    
112    -368   
80     32     
-432   944    
-144   656    
80     -160   
-80    336    
-48    272    
80     464    
-64    -16    
-240   -256   
272    336    
-208   272    
48     32     
-144   64     
-32    80     
64     -80    
-80    -544   
-16    -272   
224    160    
16     32     
0      176    
512    320    
-688   160    
224    48     
192    64     
-240   16     
-160   -1152  
-384   -912   
192    544    
-80    432    
-112   256    
0      160    
-80    672    
336    400    
-496   -32    
-80    352    
-16    96     
16     240    
-96    -16    
144    352    
112    64     
-272   -32    
48     144    
-48    400    
144    -48    
-16    -112   
48     832    
464    -144   
-1088  32     
688    -304   
-176   -64    
80     224    
48     64     
-160   144    
-224   176    
144    128    
272    -192   
160    -48    
48     368    
-208   432    
112    -160   
288    -16    
-224   48     
-128   -240   
32     -416   
176    -144   
224    144    
-64    192    
-144   176    
-16    128    
144    112    
-32    -48    
288    112    
-144   0      
-176   48     
1248   1472   
-960   960    
-1792  -672   
2208   512    
-784   288    
-1520  -512   
640    48     
-704   -976   
0      -1424  
80     -800   
192    160    
-576   208    
144    -240   
144    320    
-112   -320   
-96    304    
128    320    
-208   560    
-80    -224   
208    448    
-80    -80    
-192   1008   
2016   -64    
-1248  352    
336    -336   
0      0      
-256   720    
352    -336   
-208   -1216  
-176   -1088  
224    304    
-64    112    
-16    16     
-176   -160   
0      192    
-16    96     
-96    464    
176    960    
-416   736    
208    576    
320    176    
16     32     
80     0      
-48    960    
496    320    
-592   -416   
304    -336   
-320   1072   
1104   -112   
-368   80     
-352   -432   
608    240    
-64    48     
224    32     
352    1264   
-832   368    
48     224    
352    928    
80     32     
288    768    
-880   768    
288    -32    
528    144    
-656   144    
-112   96     
-416   0      
944    -160   
16     176    
-896   176    
400    -32    
1504   1328   
-2320  -176   
1120   -176   
1120   -288   
-528   624    
-160   -160   
-48    -144   
176    368    
304    -224   
-128   448    
176    48     
32     112    
336    224    
0      64     
-432   -32    
224    16     
128    32     
-432   192    
704    304    
-704   -80    
16     -1072  
208    -656   
-160   0      
-416   -2288  
528    272    
-208   64     
176    96     
-336   -208   
64     -144   
48     176    
128    48     
0      80     
16     96     
-80    -96    
-112   160    
176    128    
112    240    
0      656    
112    96     
-224   208    
-64    176    
64     176    
208    272    
400    176    
-256   96     
-160   80     
448    -272   
-64    -144   
-416   -240   
144    32     
48     96     
256    -496   
-1088  96     
624    -560   
240    -64    
-688   -128   
464    -64    
-48    64     
-112   176    
320    -112   
-208   272    
192    -128   
-224   32     
-16    256    
304    128    
-256   -496   
-240   -256   
112    272    
-112   -1088  
-128   -32    
272    48     
128    -160   
-96    192    
0      400    
48     96     
96     -80    
0      -304   
16     304    
112    80     
-208   -160   
-544   -928   
1952   -784   
-1488  736    
224    -432   
112    192    
-640   32     
96     -128   
896    -1200  
-112   -272   
-672   208    
416    16     
144    224    
208    288    
-288   -160   
128    -400   
80     560    
-96    -352   
224    64     
128    -176   
-128   112    
-80    -704   
944    1200   
32     -1056  
-1008  -144   
672    128    
-192   -80    
64     16     
128    192    
384    48     
-496   -192   
0      48     
208    128    
672    0      
-544   -160   
-80    64     
224    -112   
224    -16    
160    -208   
48     288    
64     16     
-16    144    
224    -144   
-80    144    
-16    96     
96     64     
464    32     
-464   48     
192    16     
-48    -48    
80     608    
-1920  -1616  
2704   176    
176    -416   
-1920  -48    
960    352    
240    -336   
48     -64    
-384   -848   
-48    -912   
112    -208   
64     -1136  
208    -304   
16     208    
-288   -240   
432    272    
176    -96    
-352   64     
240    -160   
80     -448   
128    -32    
32     -336   
-432   -560   
-560   432    
1056   -624   
-192   128    
-224   48     
656    48     
-416   -448   
-256   -192   
432    304    
208    -304   
80     -1664  
-64    64     
-128   -208   
16     176    
640    -48    
-64    48     
-336   160    
-64    208    
192    48     
288    -352   
-224   -288   
608    -480   
-304   -64    
352    -2496  
80     -96    
-688   160    
336    -144   
96     -240   
-272   240    
128    -176   
-272   -544   
208    -528   
16     224    
-1216  -192   
560    -208   
-64    -64    
-208   -592   
464    -144   
-96    -2160  
16     -80    
128    80     
-128   48     
80     -64    
128    64     
96     192    
160    -112   
-496   -16    
304    192    
-176   608    
-1296  -1904  
-912   -784   
1232   64     
-96    -48    
192    -224   
224    400    
-336   304    
448    144    
-128   -48    
144    32     
-128   -144   
16     320    
224    -224   
-128   176    
144    -192   
16     64     
-96    -128   
-32    0      
256    0      
-416   -1072  
240    -80    
-16    -1520  
-16    240    
-256   -32    
336    -128   
-336   128    
336    208    
-256   80     
64     368    
-128   80     
-592   -416   
-128   -672   
192    -240   
192    272    
-256   -32    
-48    288    
240    -1280  
-80    -224   
-208   0      
64     64     
-64    352    
512    400    
-96    496    
192    1040   
-208   960    
224    672    
64     416    
-192   832    
448    -288   
-176   -624   
256    288    
512    -128   
-1248  560    
1120   256    
-512   416    
-128   448    
432    256    
-32    -1008  
-32    -1344  
-32    1408   
272    -192   
-176   -288   
48     -128   
240    160    
-464   -128   
112    224    
96     -432   
112    48     
-16    160    
64     -32    
64     -96    
48     96     
144    64     
-160   16     
-192   -64    
-32    -304   
544    -288   
64     192    
-560   160    
192    -80    
240    -16    
-448   -112   
-1904  416    
480    -144   
-144   112    
-64    48     
320    -48    
176    160    
-752   288    
352    32     
560    -160   
-112   48     
-1024  48     
0      0      
-320   -16    
336    64     
-416   -208   
-448   96     
-80    16     
112    -144   
-32    128    
-1088  1088   
864    -400   
-1024  -64    
752    -80    
-224   192    
-128   32     
256    -896   
-128   352    
224    -320   
-352   96     
160    32     
144    176    
16     80     
-160   -176   
-144   -144   
-192   128    
256    -32    
-496   -544   
-128   -112   
-288   48     
16     16     
16     -224   
144    -160   
-464   -384   
256    -160   
416    96     
0      224    
-288   112    
-304   32     
112    464    
1056   -608   
-1696  -48    
1216   544    
-416   352    
-816   -1056  
912    -944   
368    976    
-320   768    
304    -1152  
-224   -256   
-96    144    
256    48     
-48    192    
-320   304    
160    176    
160    -32    
-112   400    
-336   -1040  
96     240    
-560   160    
-464   640    
2688   -304   
-1424  -288   
-480   -752   
-512   992    
688    -672   
-640   32     
288    -352   
64     -448   
-112   -736   
32     -32    
96     224    
-48    -16    
-448   -112   
464    160    
128    112    
-336   80     
-80    432    
-480   -32    
352    48     
32     -144   
320    304    
-448   -1552  
1568   -2304  
-368   -880   
-576   480    
896    672    
-480   -96    
-128   -208   
464    208    
-16    80     
-192   -64    
0      -416   
0      272    
752    896    
640    16     
-624   -464   
576    48     
144    608    
-208   -160   
-256   224    
496    -16    
-96    144    
-272   224    
-304   -720   
224    112    
128    112    
-720   0      
-192   480    
160    -1296  
1312   -2432  
-640   656    
304    240    
-928   144    
-32    400    
720    464    
-64    656    
-672   144    
336    192    
-64    -96    
112    240    
-304   -192   
-112   336    
272    -48    
192    192    
-336   16     
208    144    
-544   -464   
800    -160   
-208   -288   
-144   -16    
128    192    
-656   -112   
208    80     
448    80     
-256   96     
-48    144    
112    96     
-48    -32    
-96    64     
224    -32    
-480   128    
560    352    
-208   160    
0      352    
80     368    
208    -64    
-112   -160   
160    0      
-192   112    
416    112    
-208   64     
-32    -32    
-256   32     
160    32     
384    208    
-448   -16    
208    32     
-48    64     
16     112    
-128   -256   
800    32     
304    -288   
-720   -48    
32     64     
352    272    
-304   224    
96     192    
32     112    
-16    -64    
-64    128    
80     -16    
96     112    
-224   160    
256    -96    
-144   -352   
-144   -176   
-208   -112   
464    -96    
-128   224    
-128   -80    
144    288    
-64    64     
128    512    
-160   432    
64     -208   
-96    224    
-64    144    
112    -32    
80     160    
-864   -2736  
-288   352    
1264   -112   
-1088  -208   
528    320    
288    -224   
-464   480    
-80    -720   
-144   288    
512    160    
-144   -160   
-144   272    
80     128    
-112   -288   
192    -48    
-128   208    
176    -288   
32     -32    
144    352    
-32    0      
32     -928   
-512   368    
464    144    
-368   176    
480    160    
-48    -448   
-528   192    
400    320    
-288   64     
176    176    
-16    0      
80     -32    
-288   112    
224    -240   
256    160    
48     -1088  
-496   224    
48     384    
464    64     
-224   -80    
16     16     
16     128    
-32    96     
-64    128    
-80    48     
464    16     
-400   144    
128    -80    
-160   -16    
624    240    
144    688    
-560   1136   
848    256    
608    128    
-1024  -416   
-400   16     
816    -208   
-128   -464   
-272   -208   
336    32     
-368   96     
-16    16     
32     224    
-128   -112   
672    352    
-384   -496   
32     32     
-112   -48    
400    -384   
-192   -80    
-80    160    
832    -112   
-1504  112    
1072   -1200  
-144   304    
-32    -32    
80     32     
80     288    
224    -176   
-224   128    
-176   -112   
64     176    
224    -144   
-16    80     
256    48     
-512   224    
176    16     
144    -128   
64     64     
-32    512    
-112   128    
320    48     
-608   352    
-304   -240   
64     624    
1008   -464   
-176   32     
-256   -400   
16     32     
192    -3792  
-352   208    
192    1088   
752    -352   
-672   -208   
304    688    
-64    64     
-96    -64    
416    48     
-352   -64    
-80    0      
160    -144   
128    64     
64     -112   
-160   -80    
16     -160   
336    -208   
-352   224    
368    64     
416    896    
-1024  112    
576    1824   
1168   -752   
-1424  432    
-400   80     
704    320    
336    432    
-128   -112   
-208   -224   
-208   -80    
-160   544    
560    336    
-64    96     
-352   -208   
144    -64    
384    400    
288    -128   
-112   32     
128    -48    
64     -368   
-112   -560   
64     -496   
-32    144    
224    176    
96     704    
528    -144   
-528   224    
304    -624   
-608   -3728  
64     -480   
-176   256    
128    32     
-336   -64    
-96    -48    
224    320    
384    32     
-32    96     
-80    320    
-32    -352   
160    -1856  
-80    -16    
-32    -256   
64     -144   
48     -400   
-144   -128   
144    560    
304    -1856  
-688   -1632  
192    -496   
240    128    
48     -1504  
-288   64     
608    704    
464    960    
-496   1152   
656    576    
48     272    
-32    448    
320    -1072  
240    -848   
-1088  512    
48     208    
16     -272   
320    -48    
-16    64     
-272   -208   
144    -48    
208    -1120  
-288   -752   
-288   16     
336    48     
-64    -80    
208    144    
-16    -176   
0      -48    
-80    208    
-480   272    
-112   96     
624    -48    
-368   -112   
-64    0      
-128   -320   
544    -1120  
96     320    
176    -384   
-256   368    
128    -16    
-96    -176   
672    -320   
-128   288    
-288   176    
304    -48    
-384   64     
-80    144    
304    32     
-144   -160   
176    -32    
-16    48     
160    288    
112    -352   
16     -48    
208    -432   
-1056  32     
560    224    
-112   112    
272    -192   
-272   -192   
-496   -192   
256    -208   
-416   -576   
160    -80    
64     304    
-176   -128   
32     -32    
-176   -832   
144    -432   
416    -368   
144    192    
-368   224    
-16    784    
608    80     
-16    64     
-560   -464   
-16    96     
0      352    
48     -64    
48     -16    
-160   -240   
-464   -224   
384    -224   
-320   -352   
960    -736   
288    -288   
-368   -560   
336    -128   
160    192    
-528   80     
672    704    
496    288    
-576   0      
48     -176   
336    112    
96     -320   
-224   -16    
-192   -400   
224    16     
-80    -16    
224    112    
-400   256    
176    336    
144    96     
384    -96    
-1888  704    
1104   -336   
-352   -352   
-240   -832   
176    -128   
16     48     
-208   176    
-16    -320   
464    224    
384    48     
-544   -128   
-192   144    
448    -48    
288    144    
-304   128    
-128   -16    
288    128    
16     176    
-16    -64    
48     176    
-32    240    
-64    -336   
-832   128    
416    -480   
240    -80    
-416   -96    
672    -528   
-1056  96     
-112   240    
-48    -64    
-400   -288   
336    -384   
-128   112    
-176   -64    
576    -544   
-448   192    
128    256    
-544   -112   
96     32     
64     -16    
-176   96     
-176   -48    
-16    64     
128    -96    
-656   48     
-112   64     
160    32     
-176   -432   
-208   -1808  
2112   -2336  
-608   -576   
-224   144    
-496   496    
-128   176    
-64    64     
624    80     
-464   -288   
-16    -48    
256    480    
288    48     
-160   16     
80     48     
48     -160   
336    64     
96     -48    
-352   64     
-304   -304   
880    400    
-144   -192   
-320   272    
160    112    
-400   144    
-288   -48    
704    96     
-112   224    
-752   192    
-1200  16     
688    64     
-832   -112   
160    160    
16     -32    
320    112    
144    192    
-496   80     
-64    48     
256    112    
-128   -160   
-64    160    
-80    -112   
-96    -128   
304    -48    
-848   -16    
32     192    
192    32     
416    160    
-432   -144   
-128   64     
176    32     
-144   -96    
160    -32    
112    304    
704    -272   
-64    224    
144    -176   
-208   -192   
432    192    
192    432    
-496   288    
96     64     
288    80     
-192   160    
-96    96     
-32    208    
224    16     
64     192    
-288   320    
480    96     
-80    -64    
-240   192    
96     112    
160    -112   
-528   -64    
256    96     
-112   176    
192    -1056  
-240   -432   
32     704    
-96    -192   
16     -288   
-1152  -672   
1776   -944   
-688   -208   
-800   -128   
1520   528    
-848   224    
-144   48     
-272   -352   
368    -160   
-240   -336   
-128   384    
48     -16    
-176   -32    
112    0      
224    -176   
-192   416    
-48    -16    
288    0      
112    240    
-192   112    
624    864    
-1424  608    
608    -160   
320    -96    
-368   -160   
144    272    
-320   32     
-32    -512   
96     -64    
96     160    
-384   208    
112    368    
144    -80    
-160   64     
-160   144    
-176   -48    
256    96     
32     -16    
96     208    
-16    128    
-64    32     
176    -96    
-432   0      
400    96     
-160   144    
-160   272    
448    -144   
-320   96     
-192   160    
-528   -1120  
2752   320    
-1904  512    
-976   -32    
1216   112    
-1392  -48    
848    176    
368    336    
-400   384    
-256   -208   
96     272    
256    64     
-256   32     
0      16     
-208   -112   
336    144    
-80    16     
-208   -96    
128    -64    
64     144    
-112   48     
272    560    
80     -752   
-1264  208    
400    -128   
496    -256   
-176   32     
-400   384    
368    -160   
-144   96     
-48    96     
-320   32     
160    32     
224    112    
-128   -64    
-272   128    
208    64     
80     48     
-96    -80    
96     208    
-208   176    
-96    160    
192    80     
-432   -176   
-256   -80    
384    32     
-272   368    
80     336    
720    16     
-96    -32    
-448   240    
560    -64    
-400   128    
48     -208   
128    512    
768    -336   
-704   592    
128    16     
-48    128    
304    -32    
-64    176    
-192   64     
0      64     
256    96     
32     -80    
-400   -352   
448    -1008  
-32    128    
736    384    
-208   1184   
-288   432    
-560   -224   
112    624    
-64    400    
-256   -224   
784    -96    
-512   -80    
-416   -304   
240    -640   
208    -2832  
-16    160    
-160   288    
-112   144    
96     -480   
240    288    
-208   -144   
-272   -864   
192    272    
224    0      
-224   256    
-96    -224   
-32    -112   
144    -96    
272    272    
208    0      
-176   -448   
0      -128   
224    -64    
-96    -96    
240    224    
-208   -304   
48     288    
0      -112   
-64    144    
160    -16    
-16    160    
-144   288    
240    -496   
-560   -928   
224    256    
176    656    
-48    -624   
-144   -304   
-112   208    
144    192    
-208   -96    
384    32     
32     -64    
-80    592    
-192   64     
144    -208   
-112   240    
-112   912    
1280   256    
-272   400    
80     1488   
256    416    
112    -16    
80     -144   
16     -1376  
-432   -896   
16     352    
-48    336    
352    48     
16     -48    
-384   96     
64     128    
400    -192   
224    48     
-224   -208   
160    176    
112    -48    
32     160    
64     160    
272    32     
-96    -16    
-320   -48    
-32    160    
-80    32     
-48    -80    
368    -64    
-208   -64    
400    272    
-112   288    
352    -944   
144    480    
224    304    
-560   320    
304    144    
432    336    
-288   80     
-80    160    
48     -48    
-16    32     
288    256    
32     -224   
-32    64     
64     -64    
192    304    
224    -64    
0      304    
480    -416   
-1008  912    
448    -848   
352    384    
-64    704    
144    592    
-320   976    
-48    -224   
400    -496   
48     -432   
-160   480    
-96    32     
48     -304   
-96    352    
112    -176   
64     -96    
-176   240    
80     -96    
272    -1744  
-352   -224   
-192   -1488  
320    176    
-480   -208   
32     -128   
-128   -256   
-64    -560   
288    -80    
80     -944   
-320   -272   
48     -384   
144    2096   
1456   -80    
-896   -768   
256    -208   
1392   224    
-1424  -96    
1040   -224   
64     112    
-160   -320   
-96    16     
256    -1088  
-80    -128   
-48    -704   
0      272    
768    192    
-336   112    
64     -496   
224    -80    
-16    -400   
-64    160    
32     112    
-96    656    
1760   -336   
-880   32     
336    -48    
384    16     
-368   48     
336    -240   
-112   80     
-48    -720   
-128   16     
336    -240   
80     96     
-128   -64    
-96    256    
320    -16    
-176   -336   
320    -176   
-80    -160   
-32    -96    
32     -16    
-64    144    
-352   -256   
880    -512   
-32    80     
-624   848    
48     192    
80     -352   
864    224    
-48    448    
-144   -32    
208    -144   
192    -176   
-16    224    
-640   96     
-400   -448   
576    -576   
400    -352   
-592   -160   
64     -224   
32     96     
112    -368   
352    0      
-336   -16    
-240   -64    
48     352    
1136   80     
-656   336    
176    -80    
784    848    
-2768  512    
288    592    
848    -784   
-1824  -400   
1120   64     
608    128    
-752   -608   
16     -112   
512    160    
-272   192    
272    80     
-80    -224   
-208   112    
-64    -160   
-400   144    
608    -144   
-448   -32    
-64    -16    
192    208    
448    -816   
-400   448    
672    -576   
-800   112    
16     224    
448    160    
-592   32     
480    -112   
-624   -64    
-160   144    
80     -80    
176    -16    
64     -48    
-64    -32    
368    -96    
-624   -192   
880    16     
-256   -256   
144    -128   
112    0      
144    64     
-208   -128   
32     0      
256    -144   
80     -64    
-560   -64    
400    80     
-640   96     
304    64     
-176   192    
-368   -192   
608    96     
48     80     
192    -320   
-1008  224    
800    -48    
-176   240    
-80    96     
32     -192   
-368   -80    
224    -272   
256    -240   
-144   -16    
-128   -64    
128    224    
-80    -176   
64     -16    
16     -464   
-80    -256   
-320   -32    
-528   -48    
288    -128   
-352   128    
-112   144    
272    -64    
-48    240    
-160   64     
-272   336    
144    -176   
224    304    
-752   320    
-576   -1264  
1584   -1456  
-1440  688    
384    64     
-272   336    
-688   -80    
800    128    
96     64     
-848   -288   
-656   672    
304    112    
160    -32    
80     64     
-176   208    
-80    304    
288    160    
-16    -256   
32     224    
-64    80     
-96    80     
48     96     
-368   -736   
1040   -208   
-464   480    
-640   -80    
32     112    
0      -128   
64     -304   
-256   160    
64     -128   
224    64     
128    128    
-32    -48    
-416   32     
-48    -144   
256    -368   
-16    -48    
64     -96    
-112   48     
-272   64     
-1392  -208   
576    288    
-224   -144   
-288   160    
320    -368   
-16    -112   
96     -160   
-80    256    
-208   80     
-112   -464   
1696   288    
-1280  1504   
-512   112    
672    -304   
-336   -256   
-240   192    
-16    -224   
-512   -576   
384    -224   
-224   -96    
-16    -96    
-48    0      
-32    96     
192    288    
-96    192    
-160   288    
48     -96    
-240   -128   
-496   -352   
144    80     
-112   -64    
-416   -688   
672    -96    
992    -752   
-2000  48     
880    272    
-160   -1184  
-32    -480   
256    224    
-448   288    
432    0      
-240   80     
-32    112    
-16    128    
-80    112    
96     -336   
-128   176    
-720   -448   
128    -400   
240    -208   
16     16     
-32    128    
-32    -32    
-704   -1520  
-240   -880   
608    -512   
-512   -384   
368    0      
128    32     
-368   448    
-208   320    
128    16     
128    32     
-64    0      
464    880    
-800   496    
-480   -208   
224    496    
-208   432    
32     272    
-272   -144   
192    176    
80     -112   
32     -352   
-160   32     
0      336    
-160   208    
-400   -160   
32     -240   
48     -64    
-240   144    
352    1984   
784    -704   
-608   864    
-272   -32    
-224   352    
736    928    
112    -464   
-336   -656   
112    688    
-352   272    
544    -160   
-176   432    
-192   80     
-32    144    
464    144    
112    800    
-208   -144   
-160   448    
240    752    
32     -320   
0      -704   
-80    336    
-432   160    
352    -16    
528    -352   
-576   192    
304    240    
-912   -1872  
416    -496   
-112   160    
-112   272    
208    -240   
-16    -192   
-64    -96    
176    752    
-416   -192   
-464   -224   
288    288    
240    416    
-160   368    
-32    112    
-48    -16    
352    528    
-96    352    
-48    -272   
-736   -576   
336    448    
208    192    
160    -272   
-192   -144   
288    1024   
-848   672    
272    112    
320    368    
-400   64     
32     208    
384    112    
-832   -880   
128    -1824  
144    -304   
112    544    
-32    128    
-48    224    
-32    -80    
48     96     
32     624    
64     656    
-560   -192   
80     -784   
160    352    
176    112    
-112   -64    
-528   -96    
176    368    
48     672    
32     880    
-64    -784   
-352   -320   
48     160    
160    48     
-240   1728   
880    96     
-576   -688   
-416   -1088  
496    -608   
48     -16    
-400   448    
336    240    
-80    560    
176    -144   
-176   96     
-160   -64    
224    -224   
176    -208   
240    416    
-432   -304   
176    -96    
128    -80    
128    -672   
-32    128    
16     528    
32     416    
48     -160   
384    160    
-176   176    
160    -144   
-176   -16    
304    -16    
-192   208    
-80    224    
224    80     
80     -16    
-240   192    
416    -128   
-192   224    
192    128    
128    -384   
208    -528   
-224   64     
176    32     
96     96     
-384   160    
208    128    
80     288    
352    64     
-448   144    
128    16     
64     128    
304    -320   
1072   320    
-2016  608    
736    464    
832    -2592  
-752   -96    
-912   -112   
1136   -80    
-208   528    
-192   400    
688    32     
-240   32     
-96    0      
80     -64    
224    224    
-144   -32    
0      336    
-256   -336   
112    144    
304    -608   
-48    80     
160    -592   
400    1104   
-672   -432   
-480   144    
576    16     
144    208    
144    128    
-336   144    
448    32     
-144   -272   
160    -64    
112    -224   
-112   160    
16     -80    
304    192    
-224   -256   
96     128    
48     -192   
304    272    
-416   256    
224    272    
592    48     
-656   -352   
1056   -160   
560    -528   
-1024  336    
464    -400   
656    -112   
-192   -320   
-576   112    
448    -944   
352    48     
-32    64     
-368   48     
-352   160    
448    -48    
640    -256   
-368   -320   
-560   -16    
288    -240   
720    -288   
-240   -560   
-224   -272   
176    0      
608    128    
16     -464   
-976   240    
576    160    
-560   -80    
-304   -896   
3552   464    
-3184  32     
768    448    
208    224    
-96    256    
432    -368   
-688   208    
736    -272   
32     -320   
-112   -224   
480    160    
-336   -512   
-160   192    
416    -80    
64     64     
-1424  -160   
32     -112   
-16    -208   
-432   -816   
1136   192    
-16    -224   
-752   112    
496    -128   
-800   0      
912    -256   
-320   -16    
0      -448   
32     16     
32     -480   
-48    -16    
208    -176   
-320   -144   
192    96     
-16    112    
-192   0      
-64    -448   
432    -128   
-272   -240   
128    -160   
336    -400   
-96    80     
16     -208   
-32    144    
384    -192   
-496   16     
-144   48     
304    32     
-64    -32    
-96    -352   
96     -192   
0      -112   
64     -16    
432    -1280  
-496   80     
624    -288   
-160   176    
-16    32     
16     0      
-208   -16    
352    0      
-160   32     
-112   -320   
-640   -224   
32     -240   
0      -272   
80     -64    
48     48     
-32    -96    
192    272    
-432   192    
192    -32    
-48    -32    
96     384    
192    112    
-96    16     
-352   -336   
48     -80    
304    -16    
-336   352    
-32    16     
112    -112   
128    1840   
2368   -784   
-2048  -128   
-416   -240   
1440   736    
864    -96    
-944   -720   
-144   -224   
368    -208   
-16    -32    
80     -592   
-96    -480   
-224   208    
-368   80     
336    -272   
112    -592   
-432   -192   
256    -32    
80     -880   
48     176    
144    -400   
-368   976    
336    -672   
-256   624    
48     32     
-336   -192   
-80    528    
-96    -112   
272    -304   
-208   -80    
32     224    
48     -80    
32     224    
0      -912   
144    288    
-64    128    
-48    16     
336    368    
-176   -528   
-224   112    
48     272    
80     -112   
-240   32     
-80    -64    
112    -112   
-64    -96    
256    -208   
-240   224    
32     -256   
-304   -32    
912    288    
1408   -224   
-1696  -320   
608    -752   
528    -80    
-272   -448   
240    -848   
-64    -1264  
-304   -16    
144    432    
48     80     
304    -336   
-64    240    
-32    48     
-688   160    
-16    16     
-1120  -272   
-272   -80    
144    224    
64     -16    
224    -1024  
-2112  464    
2000   384    
-96    1328   
-1936  -352   
944    -896   
-288   -1344  
-496   -496   
0      -352   
384    -16    
-192   288    
-176   128    
-32    64     
192    -352   
-32    -400   
128    160    
-336   -176   
-704   -736   
688    -1392  
-400   -608   
-272   -48    
-32    48     
-32    -160   
-224   992    
832    1056   
-832   352    
-192   240    
880    176    
-800   -176   
48     -112   
-1600  96     
736    112    
-496   96     
-16    0      
48     -160   
-688   -144   
912    -736   
-464   -1088  
16     160    
-48    272    
-496   64     
432    -16    
-208   -256   
-48    128    
-208   96     
-144   -16    
464    448    
-432   864    
-16    272    
64     -272   
-864   -1536  
-720   16     
896    -48    
-912   304    
576    896    
272    32     
-656   32     
-560   -208   
144    -256   
352    -432   
-208   288    
-640   -384   
32     320    
288    128    
-80    240    
176    112    
-96    -64    
0      -80    
208    272    
-144   720    
-16    320    
-32    -80    
528    192    
-720   336    
320    48     
320    -64    
-448   256    
432    1040   
-16    1792   
432    432    
-160   -320   
-160   32     
-48    -288   
0      192    
-48    112    
64     304    
-240   -672   
-704   -112   
160    -80    
-96    -240   
-448   160    
160    864    
-304   416    
288    -400   
-176   -576   
272    -1808  
-688   -384   
16     80     
480    448    
-176   -112   
-304   -880   
384    -880   
-592   144    
96     -1584  
896    -1024  
128    96     
-224   1008   
208    -544   
96     -864   
-1248  -1312  
-400   -112   
32     -256   
96     -592   
-192   192    
176    656    
0      512    
224    272    
112    80     
-192   96     
-16    1040   
480    640    
-96    368    
-144   208    
208    400    
176    -160   
-272   -512   
272    -384   
144    240    
-80    448    
-80    288    
384    1664   
-1040  -1040  
-144   112    
752    160    
-496   64     
-384   -672   
144    -544   
0      -1232  
272    -672   
16     192    
160    368    
-80    160    
32     128    
-176   -96    
96     -448   
64     464    
304    96     
-336   96     
0      -176   
16     32     
544    992    
-1104  560    
592    -128   
176    -64    
-752   -32    
512    112    
-240   160    
16     -96    
-256   -96    
528    -64    
-192   96     
-256   112    
96     288    
224    -64    
0      112    
-272   -128   
32     144    
-16    160    
272    -96    
-288   112    
-16    -16    
-224   128    
224    48     
-288   96     
352    0      
-64    112    
-80    -256   
-160   128    
128    64     
-96    272    
-656   1280   
4096   976    
-1200  160    
-864   -48    
672    0      
432    448    
-192   512    
-384   144    
384    64     
-288   -32    
80     96     
-144   -16    
0      160    
128    96     
320    80     
-224   112    
16     160    
-64    48     
144    192    
-48    48     
-48    224    
-176   320    
1744   16     
-560   1184   
-688   -32    
128    544    
400    400    
112    368    
256    -80    
-96    192    
-288   160    
-16    -400   
304    128    
32     112    
-336   16     
304    144    
112    -32    
224    480    
-304   208    
336    544    
736    -64    
-320   784    
-864   176    
192    -16    
320    -304   
-208   176    
736    -224   
688    -304   
272    -416   
-16    -144   
-848   128    
656    304    
-112   448    
432    32     
32     224    
-352   448    
-400   464    
608    64     
288    -544   
80     32     
96     240    
-32    32     
208    192    
-160   -432   
-16    0      
192    -224   
96     160    
352    96     
-384   96     
192    -144   
-880   3088   
1424   -368   
-1184  -752   
-1104  -160   
1120   32     
-208   112    
-448   -128   
560    -208   
-192   -160   
304    64     
-352   -112   
320    112    
-208   -48    
-80    192    
416    -608   
-368   288    
-112   48     
48     128    
448    -80    
-944   -192   
672    48     
-96    -208   
160    -32    
592    -272   
-128   96     
-480   -2896  
464    176    
128    48     
-208   176    
-416   -64    
352    176    
96     -48    
144    112    
-256   256    
512    112    
96     416    
-272   128    
144    288    
176    128    
-112   128    
-160   -1984  
80     64     
-80    -240   
64     -176   
400    -128   
-176   0      
64     -32    
144    96     
-176   112    
192    -304   
32     32     
-160   -624   
480    112    
-96    448    
352    272    
-656   -784   
384    -192   
144    32     
-192   32     
96     112    
80     176    
-416   -1024  
16     -384   
176    -336   
-464   -544   
384    -400   
-96    -688   
-144   -160   
48     -432   
304    -16    
-64    -48    
-64    -32    
-48    16     
224    64     
-16    128    
0      240    
-144   864    
192    624    
-80    -288   
-128   -736   
-32    -720   
720    -2016  
-880   544    
1152   -160   
-432   544    
-32    -160   
480    -128   
-16    -464   
64     0      
16     320    
-64    368    
48     -256   
240    0      
-16    -1984  
-16    160    
112    -720   
272    -176   
-48    688    
-32    -176   
256    368    
-272   -336   
448    -1552  
-48    64     
-208   -48    
192    352    
-192   -208   
80     496    
-1328  704    
32     496    
176    112    
-272   -96    
128    352    
-336   -656   
304    -400   
16     112    
-192   -96    
-80    -48    
432    48     
16     -464   
-176   -32    
-144   -384   
192    -192   
-208   256    
48     -176   
-96    -64    
192    -816   
192    -128   
112    -336   
-64    96     
-352   208    
1632   0      
-2752  48     
288    176    
960    16     
-1024  -64    
-96    -256   
32     -192   
-192   880    
448    -1696  
320    -64    
-160   224    
-48    -48    
288    -272   
16     64     
-16    -1472  
-160   288    
16     -272   
160    256    
288    -448   
-112   304    
-512   -672   
1584   336    
-1616  -272   
304    -176   
-480   752    
-272   640    
384    528    
528    1360   
-48    960    
-368   -1024  
208    -688   
-80    -736   
-96    -48    
240    -208   
-416   -288   
448    -192   
32     -576   
-608   -1520  
-128   -800   
80     -336   
32     224    
112    -48    
160    -640   
448    1184   
-544   1376   
-528   192    
896    -1744  
384    -976   
-496   -688   
512    -544   
-272   -352   
-96    144    
272    -144   
96     32     
0      -304   
-192   880    
-1072  400    
-288   -528   
144    -592   
80     -448   
272    128    
112    -960   
-208   320    
64     -352   
-256   112    
496    304    
368    128    
48     576    
-320   800    
-448   320    
1344   592    
-2192  -496   
1120   416    
528    64     
-480   -64    
-560   -256   
96     -688   
256    -144   
-96    -128   
-112   -64    
32     1184   
-80    -256   
32     -624   
192    -80    
-192   48     
32     208    
416    0      
384    160    
-288   96     
-384   -544   
304    -272   
32     -560   
224    176    
992    1168   
-1072  800    
176    848    
656    -48    
-192   -80    
-416   192    
-144   0      
624    48     
-592   -160   
48     -240   
272    128    
-336   -128   
-96    32     
-752   16     
-96    144    
0      -16    
16     -160   
-896   -352   
240    -160   
384    400    
96     512    
240    176    
-240   -192   
-112   -624   
-1216  -672   
352    -112   
160    80     
-96    288    
-80    192    
16     -240   
-240   -32    
-400   112    
480    384    
-1072  336    
208    -704   
-544   -560   
176    -48    
-192   -128   
-64    -64    
240    16     
-80    224    
32     48     
96     272    
-544   -144   
208    -288   
-16    192    
32     416    
-368   -48    
112    144    
-112   320    
-672   -16    
352    -112   
-576   -160   
-80    -64    
336    -144   
32     224    
-304   -336   
80     1088   
-400   -2144  
-1424  496    
1904   -464   
-1424  -144   
368    -336   
176    272    
32     -112   
128    320    
-464   416    
-544   -160   
64     432    
272    -64    
-224   48     
-192   -448   
128    400    
32     -224   
-192   320    
288    0      
-400   -80    
-432   -480   
1184   -160   
-672   304    
-128   -64    
624    128    
-1168  -320   
384    -80    
80     384    
384    224    
-816   304    
64     -48    
304    144    
-96    -80    
16     0      
-16    -240   
-352   208    
48     -32    
144    128    
-624   -144   
368    64     
-640   -144   
-288   64     
-32    -32    
80     16     
256    160    
96     0      
-64    272    
96     -32    
-320   80     
96     -320   
192    -64    
304    -576   
112    -128   
-320   -80    
-1152  32     
624    176    
1008   -256   
-704   -176   
208    -112   
-208   208    
-64    96     
48     96     
-16    0      
-64    272    
416    128    
-272   176    
112    -112   
32     208    
-48    -176   
144    208    
-176   -240   
592    416    
-432   -128   
-96    48     
880    -272   
-1408  -112   
912    16     
336    336    
-352   -240   
-496   176    
512    -16    
-32    0      
-224   80     
-80    -64    
0      192    
384    -144   
-208   96     
-80    96     
-16    48     
-32    160    
160    112    
336    720    
-448   -176   
-336   448    
800    -96    
-496   128    
-96    -48    
-32    -32    
1088   112    
-512   80     
-256   -32    
352    224    
-144   32     
-192   -16    
208    288    
144    32     
224    -80    
96     496    
-768   224    
144    48     
384    144    
-96    -64    
-112   144    
-128   32     
80     -32    
272    -96    
-192   64     
-80    -48    
0      64     
-912   -2224  
1264   -992   
1328   -608   
-1760  240    
-176   464    
912    -240   
272    16     
-560   0      
-656   384    
528    64     
-288   80     
48     -32    
-16    -64    
-112   48     
128    112    
352    128    
-416   240    
-80    160    
-32    32     
576    160    
-928   -848   
144    -1008  
-160   -496   
128    64     
592    16     
-160   -496   
-768   -176   
320    48     
256    320    
64     192    
-256   -208   
224    192    
144    112    
-656   0      
624    448    
-192   336    
192    -528   
-320   -224   
176    -144   
-320   -112   
112    160    
128    -64    
-352   -96    
128    -160   
-96    -240   
224    192    
-160   288    
-336   48     
432    -160   
-80    -256   
-320   -208   
-48    320    
-288   -16    
1040   64     
-272   -192   
-400   -432   
368    -144   
272    -368   
-16    -816   
-288   -752   
0      624    
160    1184   
80     272    
128    -272   
96     112    
-32    -416   
48     64     
144    512    
160    -464   
0      112    
-64    -400   
96     208    
16     -1088  
304    48     
-16    272    
-128   464    
112    288    
272    752    
-192   1200   
320    -128   
176    -192   
-112   128    
-608   816    
896    -80    
-480   -16    
-416   -32    
64     64     
144    -1536  
96     -240   
336    32     
-48    -16    
-112   256    
128    48     
48     240    
-208   0      
-80    48     
288    16     
128    -128   
0      64     
-48    320    
-128   -368   
-272   -320   
1136   -992   
-128   656    
-48    -1408  
-640   704    
448    -208   
192    16     
-176   320    
160    224    
-416   48     
224    -144   
608    240    
-48    112    
-208   16     
80     -144   
64     336    
-64    -96    
192    -32    
80     144    
-16    128    
-64    288    
160    192    
144    -16    
-112   112    
0      -224   
-80    -32    
112    -192   
-192   224    
608    592    
-352   624    
1504   576    
-2544  -400   
-752   -336   
1856   -448   
-736   -144   
-528   -96    
64     -112   
64     768    
384    -1120  
96     -704   
-208   976    
-272   304    
352    -80    
272    288    
-304   -672   
-192   48     
112    -400   
400    16     
16     0      
-32    192    
-336   -528   
1536   512    
-1056  -144   
-512   224    
848    624    
-432   1232   
-480   1600   
576    1056   
336    112    
-608   336    
608    736    
-48    320    
-128   112    
432    0      
112    -208   
-176   -144   
192    -48    
-432   -48    
432    -64    
176    48     
-416   144    
160    -32    
352    -16    
16     192    
-992   -1120  
608    -672   
240    -288   
176    -32    
432    256    
96     160    
-912   272    
144    -496   
160    320    
512    -528   
-320   -224   
-192   -1008  
880    -1472  
-144   -576   
784    -288   
-304   96     
-96    -112   
368    32     
208    96     
-448   112    
0      -784   
176    240    
464    -240   
304    144    
-48    -400   
-512   944    
-784   -2592  
-752   -1248  
992    624    
-256   -160   
400    -256   
160    -1520  
-528   -208   
704    352    
144    -448   
-240   -240   
64     -176   
16     96     
144    32     
352    -112   
-224   -304   
-608   16     
528    -32    
-32    16     
48     -1456  
-944   -1504  
448    -1392  
128    240    
176    48     
0      -160   
-240   -32    
-16    384    
-352   48     
32     320    
288    -240   
-224   272    
304    96     
-416   -64    
128    -224   
128    176    
112    32     
0      80     
-144   80     
112    -368   
32     144    
-176   -128   
-176   16     
192    16     
288    -128   
0      144    
352    -80    
-256   48     
-48    -96    
-336   -48    
-32    -112   
48     208    
416    -32    
-464   -80    
528    -224   
384    320    
-368   -336   
80     512    
224    240    
16     -96    
-112   -592   
-544   -176   
208    -112   
288    -208   
-64    144    
-16    192    
-640   128    
64     -272   
160    400    
416    -192   
-304   -224   
-240   -240   
400    64     
16     -48    
-176   -80    
-208   0      
192    224    
0      -96    
64     -64    
48     -48    
-160   -144   
-208   32     
-416   -1488  
2064   -656   
-1408  464    
-320   -112   
752    -1232  
-1056  640    
544    -224   
224    304    
-96    -400   
-336   -144   
192    128    
448    -192   
-256   80     
-176   -144   
64     -640   
-64    192    
336    240    
-176   -80    
16     96     
112    -944   
0      -112   
480    1568   
704    -224   
-1408  -448   
704    80     
80     -16    
-496   -64    
240    -48    
208    352    
-32    -16    
-208   48     
480    -80    
-32    -112   
-192   144    
304    -432   
-400   64     
192    288    
128    32     
-16    0      
-112   -192   
-128   -16    
128    64     
-80    176    
384    96     
-320   80     
-64    -16    
-384   -128   
-432   -48    
208    128    
-240   -16    
-1104  784    
832    272    
-272   -240   
-784   -240   
-160   112    
704    320    
-272   -112   
-128   432    
-160   -384   
-80    288    
128    -224   
48     176    
-96    -160   
-96    -128   
64     96     
128    -96    
-288   144    
-16    -224   
144    -208   
-352   -176   
-48    80     
-1072  -784   
-480   608    
592    -192   
-848   160    
624    -32    
368    112    
-624   -352   
592    -144   
-608   160    
304    -32    
128    96     
-192   48     
-96    32     
128    224    
0      -80    
-656   -96    
-160   192    
-32    -352   
480    -32    
-160   128    
-96    176    
400    -112   
-464   -272   
320    32     
192    128    
-144   480    
-768   192    
304    -160   
32     48     
-256   -48    
-176   0      
128    80     
-208   80     
256    160    
16     -128   
0      -16    
-432   -240   
192    80     
400    -16    
-816   16     
384    64     
176    -48    
-128   224    
-304   -128   
-112   -96    
-48    32     
-16    160    
-816   -304   
-592   -256   
1840   2224   
-1792  2112   
240    -304   
2160   -176   
-1712  96     
-400   -192   
640    96     
320    -176   
-208   256    
-192   -48    
-160   304    
288    -48    
64     208    
-272   -144   
-128   80     
272    48     
128    0      
-80    64     
-544   -432   
688    -1216  
-400   -1104  
-16    -432   
128    336    
-656   96     
48     -96    
256    176    
96     -160   
-368   -288   
144    -736   
80     -624   
-544   384    
272    208    
-16    -368   
160    112    
-208   240    
272    192    
-272   48     
-48    -496   
448    -1104  
-416   -448   
0      -112   
-80    -96    
304    160    
-208   272    
64     240    
304    -656   
-800   -1200  
480    -400   
-16    1440   
96     64     
-128   -304   
304    816    
-880   272    
672    816    
0      1168   
-416   496    
240    176    
96     192    
-192   80     
80     -160   
-208   -96    
176    256    
80     128    
-256   -32    
160    320    
-16    144    
288    288    
-160   0      
-64    -96    
-144   272    
304    16     
-192   48     
224    64     
-304   -96    
96     32     
112    160    
64     0      
-80    32     
-240   -128   
-160   160    
208    -64    
368    592    
-944   160    
256    -16    
208    176    
128    -128   
-464   128    
-144   608    
64     -112   
128    -112   
-80    128    
-304   208    
32     -16    
160    16     
368    -64    
-816   272    
-32    208    
112    -80    
224    64     
32     -64    
-160   96     
-368   -544   
288    320    
-176   224    
-48    144    
112    272    
0      176    
400    224    
-672   400    
0      320    
464    -64    
32     32     
-304   80     
48     288    
-16    -64    
16     0      
144    128    
-96    48     
-112   48     
240    144    
-64    320    
-80    80     
-208   144    
160    208    
-112   240    
224    48     
-464   80     
-160   -80    
48     -48    
720    -688   
-336   -992   
1664   -1040  
-1168  -1120  
1248   512    
-288   352    
-992   480    
-48    -80    
560    -944   
-240   928    
0      1568   
-224   -352   
352    -336   
592    96     
-384   320    
-256   48     
224    0      
144    -192   
144    448    
-176   256    
-112   80     
208    -112   
-640   -224   
1664   -560   
-672   -48    
-560   -48    
880    64     
384    -64    
-80    -1232  
-176   0      
416    240    
-288   208    
-64    -32    
160    -592   
368    -64    
-304   -320   
96     128    
320    96     
-112   592    
-112   192    
-32    48     
224    64     
48     112    
32     -96    
560    192    
448    32     
-304   -336   
-320   96     
304    48     
64     -32    
192    -304   
-544   176    
-80    176    
528    80     
-256   -64    
-288   80     
-288   -80    
896    304    
0      -128   
-784   48     
224    192    
48     -32    
48     -48    
-224   -48    
-384   -336   
224    -192   
224    96     
-320   -272   
16     176    
-112   240    
-304   96     
2128   -544   
-2784  80     
496    -64    
1472   144    
-496   64     
-624   -480   
240    64     
704    -128   
128    -96    
-256   -32    
224    128    
144    -720   
-192   16     
624    64     
-48    96     
-272   192    
-16    144    
176    48     
-112   96     
512    -560   
-608   64     
672    16     
-480   -144   
448    160    
240    -304   
288    80     
-224   -336   
-32    16     
320    256    
-176   240    
416    272    
-160   160    
16     64     
112    320    
224    256    
96     -400   
-80    176    
224    -160   
-112   304    
-256   -224   
288    176    
336    -80    
-448   192    
64     288    
-304   96     
176    48     
384    80     
-48    416    
-32    128    
-32    288    
416    -32    
-80    80     
96     -512   
-352   192    
832    336    
352    -16    
-848   -208   
656    -160   
-192   -432   
272    -320   
-192   -32    
-64    272    
128    208    
0      64     
256    -80    
-208   -272   
192    -1232  
-240   -160   
32     16     
112    -112   
112    32     
-144   -352   
80     -2224  
-96    64     
368    -1104  
-448   112    
192    128    
-32    -624   
112    160    
96     -416   
-624   -912   
2256   880    
656    928    
-1120  560    
464    -80    
-448   144    
848    -352   
-32    352    
-64    -240   
-320   -240   
352    208    
-112   -64    
96     -128   
-1136  -160   
48     176    
288    -112   
-384   128    
320    -16    
-64    -1552  
-96    128    
64     -16    
-368   432    
1376   -784   
-1008  -32    
-176   -176   
656    64     
-224   80     
64     256    
-656   -16    
-48    -96    
480    -64    
80     0      
-176   128    
16     -128   
192    -176   
-176   -768   
336    80     
-368   -272   
48     256    
416    -464   
-400   128    
240    -48    
-144   16     
0      48     
496    -80    
-464   -144   
-16    64     
256    64     
80     -80    
-32    16     
992    -496   
-2176  656    
736    416    
400    112    
-496   -80    
352    256    
-160   -96    
-368   0      
336    -176   
192    -112   
-592   -224   
-144   -128   
16     64     
480    48     
-592   -48    
416    -432   
-240   16     
16     -176   
224    -160   
-112   -32    
48     112    
48     16     
-1296  432    
640    48     
112    480    
-304   0      
368    -48    
-704   256    
-336   112    
-16    -240   
128    -432   
160    80     
-16    -352   
-144   144    
128    64     
176    -176   
-304   176    
-32    -352   
352    48     
-48    128    
-320   -160   
80     -544   
1024   192    
-800   176    
80     -400   
544    208    
-512   368    
-144   -592   
448    -144   
160    -96    
-160   -144   
-304   32     
208    -112   
-48    112    
-112   112    
-144   -112   
1056   -16    
-576   160    
32     192    
64     -224   
-432   0      
176    64     
-144   -560   
288    96     
48     -64    
128    544    
-624   144    
-288   16     
560    48     
288    -544   
-528   208    
400    -1344  
-368   400    
1568   -192   
-512   128    
-1168  -288   
1248   1376   
-784   1072   
-704   -288   
16     -352   
16     16     
0      80     
-96    -48    
256    16     
80     -256   
-112   -144   
-208   -272   
64     320    
-1104  -160   
528    -528   
-448   -64    
-160   544    
192    448    
-128   640    
-144   1104   
0      256    
-80    -176   
-1120  -384   
-160   -432   
-96    -432   
176    368    
-96    288    
224    -368   
0      -880   
-336   48     
-160   -160   
208    -64    
80     -896   
-608   -976   
32     -256   
-96    -48    
144    -48    
176    -192   
-368   -992   
336    -176   
-16    832    
144    112    
-32    -144   
-144   736    
-32    -208   
-64    384    
400    880    
-384   0      
-48    -176   
64     0      
-272   144    
-368   192    
176    800    
240    1168   
-832   -384   
48     -784   
-16    144    
96     256    
-80    -144   
-64    16     
-192   -64    
240    -96    
-112   -64    
-464   -320   
0      -80    
-160   96     
240    0      
-48    64     
-224   -48    
-192   -16    
272    48     
-768   48     
512    48     
-736   -128   
-80    352    
496    -32    
0      448    
-112   16     
96     48     
336    128    
-176   -208   
-96    352    
-16    320    
-208   160    
320    -48    
-16    -16    
-320   16     
-192   96     
240    -144   
-144   -64    
-112   128    
-208   -16    
-32    -128   
-144   -592   
96     -224   
-32    -64    
-512   416    
496    272    
-384   32     
-16    464    
-48    512    
-32    0      
240    -352   
-640   -816   
160    32     
320    336    
-48    -192   
-64    368    
-96    48     
-192   192    
-16    112    
144    192    
320    -480   
-368   -176   
-400   512    
64     608    
352    -848   
-112   336    
-320   672    
-320   -208   
560    0      
-192   -48    
-384   -112   
-80    96     
272    144    
-304   -1360  
2256   -656   
-848   1344   
-544   112    
624    1680   
736    80     
-896   128    
928    752    
288    768    
-224   240    
64     80     
96     304    
80     160    
128    288    
-288   80     
-16    240    
160    48     
0      -320   
-240   -144   
-32    -16    
208    160    
160    -704   
-1584  736    
1808   224    
-976   -16    
112    32     
688    592    
-816   160    
-48    -64    
-96    160    
-16    -80    
48     48     
-176   0      
80     304    
-48    -48    
-448   112    
256    -16    
192    400    
-496   0      
-96    64     
352    0      
0      0      
48     496    
544    -112   
-32    -80    
112    720    
80     528    
96     16     
-144   -112   
544    -64    
-320   0      
-240   16     
272    400    
-128   192    
0      32     
-240   160    
240    -16    
320    336    
-288   48     
640    -224   
-288   176    
-96    192    
-80    16     
32     80     
0      -32    
608    976    
-944   112    
-400   256    
1008   64     
-352   528    
-192   -1824  
656    -2704  
768    1136   
528    480    
-736   96     
-48    128    
464    192    
288    176    
-192   -16    
-96    176    
176    -976   
160    144    
432    -16    
32     272    
16     -96    
128    256    
272    0      
-112   112    
-32    48     
-400   -48    
512    192    
-304   224    
16     80     
544    -64    
-32    224    
-640   -1696  
0      352    
672    -128   
-1136  -48    
832    32     
-448   176    
32     144    
-32    224    
48     112    
-208   144    
288    272    
16     96     
-64    -304   
160    192    
-224   48     
64     -576   
0      96     
128    -32    
96     336    
-144   352    
-224   144    
128    160    
272    48     
-208   128    
-16    80     
128    32     
48     48     
-112   464    
1104   48     
-816   -112   
272    -608   
352    112    
-176   -304   
-112   192    
128    448    
64     32     
-176   256    
256    304    
-336   80     
-96    0      
368    -240   
160    896    
-864   768    
272    -624   
768    -240   
-256   320    
-272   -32    
-64    -400   
112    176    
304    -160   
64     144    
-432   -192   
-144   96     
256    640    
400    64     
-256   -288   
-208   -2320  
-1600  1760   
2000   144    
-832   736    
784    -352   
-272   -32    
-240   128    
-272   -544   
192    -560   
288    128    
-288   -96    
-192   80     
0      0      
608    304    
-720   816    
288    -352   
-192   -32    
576    208    
32     480    
-336   -352   
368    720    
-608   -624   
-64    400    
1056   -192   
-240   16     
-320   -32    
0      320    
336    144    
-48    -16    
112    -320   
-160   176    
96     -80    
16     208    
336    32     
-48    96     
-256   144    
160    16     
480    64     
-288   -400   
128    128    
-208   32     
112    112    
160    16     
-80    128    
-112   16     
352    -400   
-128   64     
-96    -368   
48     80     
-544   -16    
96     736    
3008   32     
-1872  352    
-16    -512   
1040   -112   
-1104  560    
512    640    
112    240    
-32    80     
-16    -96    
-16    -48    
-192   288    
416    192    
112    288    
-80    -240   
48     320    
192    -144   
-16    256    
-224   112    
128    176    
-224   -304   
1024   -1200  
-80    144    
-864   -2112  
1728   -240   
-368   -128   
160    -160   
464    -80    
-16    -640   
256    -208   
-544   208    
208    -16    
400    224    
-240   0      
-288   -1568  
352    144    
64     -480   
160    -128   
144    -48    
48     80     
-496   240    
272    -240   
-544   -720   
736    -272   
-592   176    
320    -1104  
1200   -160   
-752   496    
64     -352   
400    -512   
-352   192    
144    16     
-48    208    
-144   -144   
-592   224    
-1024  144    
368    -880   
-272   64     
-48    688    
-400   -96    
256    -144   
128    -112   
-160   -80    
80     0      
256    592    
64     624    
-544   368    
368    352    
64     48     
96     -176   
1040   1840   
-2192  576    
-64    144    
1776   -432   
-496   -144   
-912   -1696  
-240   -1136  
1008   -1728  
-384   288    
-32    224    
-240   48     
560    352    
256    -336   
-176   48     
-80    48     
16     448    
-112   -208   
-128   -464   
224    -592   
16     -640   
-160   -336   
-64    112    
176    -96    
-16    16     
-304   -496   
464    -432   
128    704    
-128   1152   
192    -544   
176    352    
32     384    
-160   -288   
-448   -16    
272    144    
-192   544    
-48    -256   
224    -320   
-16    32     
-96    400    
208    -1280  
208    -176   
-496   320    
128    208    
48     128    
464    256    
-352   -112   
-288   -224   
224    208    
160    448    
208    272    
-176   -32    
-448   880    
1280   -528   
-160   1104   
144    1168   
0      672    
304    720    
-288   592    
-432   -784   
480    -352   
-336   -112   
-144   -128   
-16    80     
16     288    
-288   64     
416    -16    
-144   -112   
-80    -1392  
704    32     
368    368    
-32    -272   
-352   -48    
208    112    
-224   224    
32     112    
-192   -368   
-128   -480   
608    -1248  
640    -464   
-1200  80     
-448   16     
368    576    
592    368    
-48    -320   
-800   -512   
352    -240   
-64    -448   
96     -672   
192    0      
-80    -336   
-160   144    
80     -272   
80     -224   
304    -288   
80     -48    
64     144    
-320   -224   
192    -288   
224    128    
-304   80     
-624   -128   
640    -416   
-992   752    
512    -544   
-256   -592   
-208   -16    
240    64     
-240   608    
128    -272   
-128   48     
-256   -64    
128    272    
304    -480   
-304   192    
-384   -64    
352    112    
32     32     
96     -32    
-128   224    
-272   -400   
-240   -512   
192    -128   
176    -80    
-384   16     
272    160    
-512   -48    
336    128    
-368   -144   
-80    -16    
784    544    
-736   -416   
-2256  -16    
1808   736    
16     -16    
-1264  320    
880    496    
-448   144    
-32    -160   
64     -320   
272    48     
-16    80     
-640   112    
384    -112   
416    112    
-128   -32    
-224   96     
-32    -16    
-16    160    
-80    -48    
-256   128    
-224   -160   
560    384    
624    -224   
-1072  192    
816    -112   
-656   0      
336    48     
208    144    
-240   80     
432    -80    
-272   208    
-48    48     
192    112    
-176   64     
112    160    
-864   16     
304    -304   
160    -208   
-592   -32    
0      352    
-192   32     
336    400    
-240   -144   
-464   288    
-64    128    
-128   0      
288    112    
0      -240   
-32    448    
-368   80     
-336   -160   
416    0      
256    -112   
-544   32     
-96    64     
272    0      
32     608    
224    144    
-256   -112   
-544   0      
64     -64    
224    -224   
64     -64    
-304   208    
-480   -96    
624    384    
576    -64    
-528   64     
-416   -48    
-512   -1056  
-352   2848   
928    -320   
-1440  -240   
608    -80    
176    -320   
-384   176    
208    -64    
112    224    
16     96     
-240   240    
144    -80    
64     176    
464    -48    
-176   64     
112    144    
-96    192    
224    -32    
272    112    
272    192    
-1280  80     
848    320    
96     -112   
-352   -112   
416    176    
-96    144    
-672   144    
480    160    
-144   160    
176    288    
-368   32     
256    240    
48     -112   
-80    -80    
192    -144   
-80    -80    
144    160    
-320   -64    
64     -16    
224    144    
-272   -80    
80     64     
-208   96     
144    112    
32     -32    
80     0      
-16    64     
192    96     
-48    48     
-512   64     
528    -16    
-80    48     
208    256    
-1200  336    
480    -272   
-128   480    
752    112    
-416   -32    
192    -208   
-80    -64    
144    64     
128    112    
-288   32     
48     144    
240    208    
192    0      
-320   64     
0      224    
288    -16    
224    48     
208    320    
-272   -112   
-64    -208   
128    -80    
-32    96     
-16    48     
224    -368   
-272   320    
32     368    
224    32     
-16    -80    
848    2128   
-1856  1168   
992    -96    
528    -496   
48     -432   
-352   336    
-16    608    
0      -288   
48     -512   
160    -64    
-192   384    
0      16     
320    -80    
-160   0      
80     -784   
32     416    
192    112    
-48    192    
192    288    
-224   -320   
-48    416    
672    1088   
-64    -592   
-736   656    
1024   -464   
-672   368    
112    64     
160    -208   
144    208    
-272   0      
-64    -112   
-128   -944   
320    -304   
-80    176    
-320   160    
384    464    
-112   304    
-64    -720   
-64    -208   
-240   0      
400    96     
96     48     
-112   48     
-160   -16    
128    32     
-80    208    
32     208    
-32    -32    
64     176    
16     32     
-16    -720   
-352   -112   
400    -368   
-976   64     
1344   256    
96     32     
-160   208    
-272   160    
48     464    
208    544    
-176   528    
192    256    
288    48     
-512   -32    
176    288    
256    224    
-288   -32    
352    64     
192    80     
48     -304   
-64    144    
-336   352    
2656   -240   
-1600  848    
48     80     
1008   -208   
16     592    
-656   1616   
336    1280   
80     576    
-304   112    
384    48     
48     -192   
-16    192    
112    -400   
112    272    
208    0      
-144   1136   
800    224    
-224   656    
0      592    
320    64     
144    480    
32     848    
176    1216   
784    656    
-960   592    
-48    -832   
112    64     
0      -176   
176    352    
288    -1088  
16     864    
416    656    
-1184  752    
-208   96     
528    -208   
0      832    
800    928    
-320   752    
-112   0      
400    -112   
64     288    
-160   32     
0      112    
48     272    
-352   336    
48     208    
208    -1728  
96     16     
496    1616   
-240   768    
16     320    
1472   -416   
-704   448    
-640   1152   
608    400    
16     -1616  
272    432    
-288   -336   
-80    592    
576    -1104  
176    336    
-304   128    
80     288    
176    16     
160    -80    
464    -272   
-272   -336   
128    544    
96     112    
-16    -80    
0      64     
576    192    
-320   48     
-16    304    
432    -320   
256    352    
-480   576    
-32    -688   
-64    -192   
320    256    
160    -400   
-192   128    
16     208    
400    -400   
-128   -624   
-16    -16    
336    -480   
96     608    
-224   864    
0      128    
144    0      
288    384    
-176   144    
144    320    
-336   -768   
128    -752   
560    1392   
176    -240   
-448   -112   
144    -720   
-112   320    
800    592    
-240   -48    
-512   176    
656    -160   
16     -288   
-16    -544   
32     -208   
128    1168   
48     -272   
160    -352   
-112   -16    
0      432    
144    -336   
-80    -320   
-96    64     
-192   -384   
240    832    
224    160    
-128   -128   
160    -272   
-160   -32    
192    208    
80     976    
-192   480    
496    240    
-1184  -240   
-320   -336   
256    96     
768    2176   
848    -112   
-1024  -608   
-128   1088   
480    -640   
288    512    
-224   -176   
-16    320    
80     192    
32     -688   
240    -272   
-80    -176   
-352   224    
144    -496   
224    64     
-208   -176   
-304   32     
272    -928   
64     -16    
-16    -1680  
288    -256   
-560   896    
544    320    
-96    0      
-32    368    
-592   368    
368    432    
-256   896    
-144   0      
-1344  -304   
96     -176   
96     -80    
192    -32    
-64    32     
32     -176   
-16    -128   
48     -32    
-112   96     
160    16     
-144   -160   
-208   112    
400    128    
-96    16     
352    -160   
-320   -80    
-256   -16    
-32    80     
144    -80    
176    -224   
656    -32    
-1504  1072   
16     240    
1472   160    
-448   48     
-912   -256   
336    128    
272    320    
-544   -224   
224    -32    
64     -64    
-352   -48    
128    16     
-128   -80    
336    96     
-16    -224   
-192   -128   
400    -896   
224    -320   
-208   112    
80     -64    
256    784    
-1232  -288   
80     128    
128    96     
-368   32     
144    240    
176    48     
-32    0      
-240   224    
272    -304   
320    16     
32     64     
-16    -16    
-304   144    
80     -96    
-64    48     
-16    64     
-64    -384   
240    -368   
48     320    
96     -128   
-448   160    
80     -352   
-672   -32    
688    -480   
32     -144   
-32    -64    
-160   -64    
-192   -288   
-80    -144   
464    -48    
-304   -64    
-176   224    
-176   128    
0      -144   
-128   -192   
288    32     
-272   352    
-272   208    
-448   -256   
256    48     
-320   -48    
-432   -96    
128    32     
64     0      
-672   192    
-464   176    
-592   16     
-128   -768   
3136   1552   
-3168  464    
352    1104   
720    192    
-912   -224   
576    -384   
-528   -480   
-352   288    
272    112    
-192   64     
128    -16    
-112   80     
-784   -176   
64     224    
576    -144   
-64    144    
-128   -96    
48     208    
128    -256   
160    1456   
544    128    
-704   304    
240    -64    
-176   64     
-64    96     
0      64     
-128   16     
-368   -144   
128    240    
-352   64     
-144   48     
-128   -80    
144    -96    
-256   -96    
208    -144   
-368   -64    
384    -80    
-208   256    
-32    160    
320    240    
-208   64     
112    -80    
80     -32    
-240   128    
-80    0      
208    160    
-416   -112   
144    160    
112    -80    
-96    352    
336    272    
-176   336    
-96    -144   
-240   256    
784    -416   
-544   -240   
-320   128    
384    896    
448    624    
-320   -112   
96     64     
-576   80     
144    160    
288    80     
-128   176    
-176   128    
128    64     
-208   0      
48     -16    
80     144    
-64    -96    
-240   80     
256    224    
-240   384    
-272   48     
176    -64    
-144   -160   
-48    384    
-304   -112   
16     128    
0      -32    
-768   -1440  
896    -1216  
-736   656    
-656   528    
800    -64    
112    -80    
-208   112    
-448   -944   
96     -688   
368    -192   
-288   320    
-32    160    
-32    0      
176    -400   
-96    -128   
160    256    
-176   304    
-48    64     
-80    208    
64     -224   
160    -416   
-112   256    
0      272    
-208   720    
288    -224   
-480   -560   
80     64     
176    224    
-16    16     
-16    272    
-144   -384   
16     0      
144    -368   
208    592    
-64    240    
336    112    
-480   -432   
-64    448    
80     -128   
-16    -192   
-112   80     
64     48     
-240   112    
80     -32    
208    64     
-336   192    
128    128    
-32    96     
96     -608   
-880   -1280  
1424   -112   
256    896    
-1200  -352   
1264   -816   
-336   -96    
-32    -464   
496    704    
-64    -208   
-144   176    
-224   0      
464    208    
192    112    
-96    -304   
-272   -192   
80     224    
112    48     
-112   -304   
96     80     
128    64     
-112   160    
112    -752   
-1712  704    
1968   -128   
-128   -144   
-592   736    
304    992    
192    720    
-1184  -1424  
208    -2384  
352    -1152  
-288   768    
128    368    
-112   -112   
-96    -272   
320    16     
176    -48    
-480   -176   
272    208    
160    224    
32     272    
80     128    
-224   416    
-32    64     
544    1120   
-736   672    
-496   -320   
1184   -608   
-176   560    
320    -352   
-224   144    
-256   416    
656    448    
-800   448    
-112   -544   
-288   -352   
-64    -32    
352    -128   
-1312  -816   
528    -336   
-176   208    
144    -16    
-288   0      
-240   384    
304    672    
-80    -848   
224    -320   
64     -128   
96     -352   
-304   32     
64     208    
-976   816    
496    -208   
-112   -832   
-432   -192   
560    992    
0      1056   
-176   704    
-336   -560   
-160   -16    
400    -688   
240    464    
-320   352    
-80    224    
208    -656   
304    160    
-48    448    
-80    112    
16     272    
176    560    
32     -240   
-112   -80    
144    -32    
-48    144    
-192   688    
480    576    
96     672    
352    672    
-240   832    
160    464    
80     -432   
112    -1136  
-416   -624   
-32    384    
448    496    
160    288    
-160   192    
128    272    
-64    96     
160    448    
96     -336   
176    192    
16     -544   
336    160    
-320   -304   
272    -352   
-80    -32    
96     -320   
-32    -96    
32     704    
96     544    
-96    -80    
528    -720   
-320   208    
-656   592    
720    1248   
720    800    
-96    848    
80     1040   
192    672    
448    96     
352    128    
-320   -128   
192    -112   
-128   16     
192    224    
-80    288    
160    -176   
48     -80    
176    -128   
256    -432   
-384   -112   
80     -240   
176    144    
-80    -1008  
-96    176    
-144   1184   
336    800    
-288   80     
336    -176   
-16    -128   
-1088  -1264  
672    -1072  
-320   208    
-880   -368   
768    -192   
64     -128   
-160   -592   
-160   64     
304    -560   
144    96     
16     112    
-160   224    
64     -208   
96     448    
240    -80    
16     240    
-64    160    
176    -240   
80     48     
0      -448   
-112   -432   
880    -592   
-992   256    
480    -192   
848    16     
-1088  624    
176    -16    
240    288    
224    -352   
-432   -240   
48     -80    
192    128    
-80    0      
128    176    
96     64     
0      288    
-240   -32    
192    96     
-112   -144   
128    -16    
-48    160    
240    -80    
-464   160    
192    256    
160    -2592  
144    64     
-272   -336   
-16    48     
304    -112   
-560   -288   
864    -1168  
-1424  736    
1424   400    
-336   -160   
-1024  -352   
1328   16     
-480   -272   
48     -400   
528    -672   
-448   -336   
-96    96     
144    -128   
112    -176   
256    -1280  
240    -176   
-416   176    
528    -96    
-304   -704   
240    -16    
-160   -48    
-16    -176   
1040   656    
240    -96    
-816   560    
1792   -304   
-1344  -48    
336    -512   
192    -288   
-128   -1168  
224    32     
-80    -1920  
32     32     
80     -208   
0      0      
160    -144   
-240   112    
208    -32    
-256   656    
112    -96    
-256   -64    
-304   -80    
-304   -192   
176    -80    
0      -320   
-80    16     
352    480    
-304   320    
80     -1248  
-928   352    
288    -32    
384    112    
-464   -144   
-32    -80    
192    80     
-288   -112   
-208   16     
320    -16    
64     528    
576    -16    
-96    192    
-144   -464   
-224   -112   
96     -864   
48     96     
160    -192   
-464   80     
128    0      
192    -208   
0      96     
-1312  -1936  
2320   -2880  
96     944    
-624   48     
-352   176    
-160   48     
-112   -240   
608    176    
208    -64    
-800   272    
64     128    
720    0      
-384   -16    
32     -112   
-96    -32    
208    -16    
-160   0      
96     -112   
-1136  -144   
-112   -192   
432    384    
-448   336    
32     48     
224    -240   
64     -64    
-144   -3072  
272    16     
-576   272    
928    128    
-352   160    
-32    80     
-16    96     
-32    192    
-400   -144   
352    432    
96     352    
-176   384    
192    208    
-320   -48    
464    224    
-32    -832   
-176   0      
48     176    
-80    -160   
-192   -432   
448    240    
-192   1120   
-320   800    
480    224    
96     416    
-96    208    
48     -400   
272    -576   
-16    160    
224    656    
208    208    
-80    480    
-368   128    
160    0      
416    224    
-32    48     
-400   192    
256    128    
32     144    
208    432    
-144   -48    
-400   -256   
0      736    
368    -352   
-144   -1296  
-96    240    
-800   368    
416    48     
-144   -304   
-16    -192   
-128   -352   
128    -464   
144    0      
-64    -624   
96     240    
-256   -112   
912    224    
-1552  1584   
448    -688   
256    -976   
32     160    
-384   144    
64     672    
464    -992   
-176   16     
-80    224    
-176   -64    
-112   208    
144    -112   
176    -16    
-336   0      
144    224    
192    400    
160    -224   
-288   -304   
-96    -240   
352    -256   
-1360  496    
592    64     
256    176    
-304   112    
-304   16     
-288   112    
32     -208   
144    -80    
80     176    
-192   -192   
-240   96     
64     80     
-48    48     
-48    160    
336    48     
-576   -336   
-352   640    
416    80     
-304   160    
-128   32     
-384   -16    
336    112    
240    -112   
288    160    
-768   96     
192    160    
224    -80    
-80    80     
-272   80     
-1248  2032   
2416   -400   
-640   432    
-144   -80    
144    384    
256    448    
-576   -240   
-64    864    
-32    -160   
-64    80     
-128   -576   
80     48     
64     320    
16     -96    
-320   128    
16     -32    
304    16     
-160   464    
-192   400    
80     -704   
496    1648   
-816   -1280  
-1072  544    
1264   -992   
-1024  -208   
464    -208   
256    1200   
16     2000   
-720   2016   
576    544    
-352   -560   
-608   -704   
432    -336   
-144   0      
-224   384    
-256   176    
320    288    
-16    608    
-448   176    
208    208    
-16    -16    
-176   160    
160    352    
-160   0      
-128   -688   
-272   -1200  
-144   -720   
-160   -1264  
-656   -960   
240    -80    
-128   208    
-416   336    
192    -48    
-96    -688   
-176   -112   
704    112    
-96    368    
0      -336   
-240   -128   
560    16     
-336   -80    
-320   208    
-16    -592   
-272   0      
176    -32    
-448   688    
304    -80    
-64    -336   
-176   -240   
-352   192    
-848   1936   
416    544    
-384   -96    
16     -608   
320    432    
624    864    
-864   1280   
-480   -592   
1056   -64    
208    -80    
-560   144    
-464   -192   
592    128    
272    -16    
-272   48     
16     48     
-144   80     
352    -320   
256    -1024  
-496   -32    
64     480    
-96    560    
496    16     
352    0      
-864   -160   
528    416    
-352   -16    
224    208    
288    64     
-304   480    
192    624    
-112   384    
128    -320   
448    48     
-32    16     
-176   16     
96     -128   
-32    192    
-240   160    
80     80     
16     32     
-192   -112   
-96    -48    
96     32     
80     16     
-144   864    
-48    688    
176    -320   
-448   -544   
176    -176   
-16    48     
-16    992    
992    304    
-368   128    
0      224    
96     112    
-144   -96    
544    -192   
-160   96     
-96    96     
80     176    
80     384    
-144   400    
-80    224    
320    64     
16     16     
-240   192    
192    48     
160    -592   
-544   192    
272    128    
-64    160    
-144   288    
80     0      
-272   -336   
752    -144   
16     496    
-96    -64    
48     192    
-176   80     
1312   1584   
-3168  1040   
368    -240   
1168   96     
-640   -240   
32     -16    
192    -160   
-80    -592   
0      128    
192    96     
-80    176    
-288   368    
352    -96    
-80    -272   
0      0      
96     288    
-320   320    
304    -64    
-64    96     
32     192    
-352   -464   
1184   160    
-560   -224   
-352   272    
-208   224    
-160   96     
304    288    
-112   208    
112    -272   
-384   192    
112    16     
-128   176    
208    -144   
384    224    
-528   96     
-32    -48    
160    272    
-64    -480   
-96    -48    
-80    -688   
256    16     
-48    176    
80     64     
-176   48     
240    144    
112    -320   
-352   272    
528    -32    
-240   96     
96     -144   
144    672    
208    -816   
96     -336   
-384   32     
-240   -160   
896    112    
-144   384    
-176   0      
64     -48    
-384   32     
368    16     
144    160    
-64    96     
-288   160    
608    288    
-336   -48    
-80    96     
400    48     
-208   0      
224    -224   
48     224    
-736   -736   
1424   0      
144    -272   
-848   64     
1040   128    
-16    192    
-336   -288   
160    176    
288    288    
-192   -48    
-112   176    
512    48     
-192   16     
-224   -80    
432    64     
-96    -352   
112    16     
-256   -48    
288    208    
48     16     
32     -96    
608    -64    
-608   0      
128    -80    
336    -80    
-112   96     
336    224    
-160   -128   
-160   -288   
464    128    
-96    64     
368    0      
0      128    
144    128    
112    368    
496    -160   
-272   -272   
32     -496   
-368   368    
192    -704   
64     64     
144    -224   
64     64     
-160   -64    
0      64     
640    48     
-80    160    
-352   16     
80     -288   
-1008  16     
464    896    
-496   64     
-48    -96    
1296   96     
-672   -352   
-160   208    
48     -352   
-32    240    
528    -368   
-288   144    
16     -768   
-48    224    
16     -16    
192    -1392  
320    128    
-208   -1504  
160    -368   
384    96     
-848   -576   
400    -256   
192    144    
-16    -64    
-368   80     
416    0      
-112   -64    
-544   48     
320    -160   
160    224    
416    -608   
-464   80     
-16    -160   
416    -336   
384    592    
-672   -96    
-64    320    
752    480    
-448   752    
176    -1104  
256    288    
16     304    
48     416    
192    304    
208    240    
-32    528    
224    960    
-256   176    
192    -272   
-736   656    
288    432    
-112   -256   
-96    -1248  
240    -528   
0      -2784  
16     -560   
112    -544   
-416   -1776  
-224   -1840  
208    304    
-208   912    
416    32     
-288   -112   
128    -48    
-464   -224   
320    -576   
80     272    
-48    400    
-96    256    
-192   -16    
176    416    
80     -512   
160    -48    
-32    -160   
-112   80     
288    224    
0      -32    
64     -224   
160    -96    
-544   288    
-32    -192   
96     -96    
144    -592   
-624   48     
32     -496   
32     -96    
0      -992   
128    -96    
-192   144    
-144   128    
144    -112   
208    -64    
-112   -96    
32     32     
-272   -32    
-16    96     
144    -112   
-288   144    
64     -272   
-64    -384   
160    -48    
-432   -1184  
1024   -432   
-80    608    
-176   -64    
-224   64     
-48    32     
16     -272   
400    -368   
96     64     
-224   80     
-208   160    
368    -112   
-112   -144   
-16    0      
-16    64     
160    -48    
-352   -96    
0      -2080  
176    -416   
0      -16    
160    -128   
304    -192   
64     -80    
-288   -272   
0      -304   
-64    -240   
192    32     
-112   -16    
400    96     
-256   576    
1504   1120   
-1280  992    
-1712  -2240  
2064   192    
-576   208    
-608   304    
128    624    
688    -1392  
-144   144    
-16    336    
64     -272   
-128   176    
96     96     
128    208    
-432   -256   
176    -288   
272    240    
0      528    
-208   -576   
-256   -592   
176    80     
496    1440   
912    160    
-1152  -384   
944    -304   
-512   -240   
144    256    
-176   960    
816    128    
-224   912    
-528   1056   
336    352    
0      0      
-496   80     
-64    128    
-1312  -304   
-112   160    
-240   96     
544    -304   
112    80     
-352   64     
-272   -112   
512    -368   
128    -336   
-608   1040   
320    -288   
640    96     
208    64     
-304   368    
-64    352    
-272   32     
512    112    
-480   160    
-528   128    
368    448    
-720   96     
-80    -304   
-256   176    
-416   -112   
640    96     
-432   -304   
144    64     
80     -80    
-144   736    
400    -192   
-128   32     
528    -48    
-176   96     
-144   224    
-976   -688   
576    -1296  
-1936  -816   
1168   400    
624    -144   
432    176    
-880   -16    
-16    256    
176    416    
320    400    
-384   160    
-176   -16    
160    48     
-240   -208   
448    352    
-512   -288   
-112   192    
128    -176   
-320   176    
944    384    
-752   1104   
-64    -320   
304    -336   
-320   -256   
64     256    
-16    -128   
-416   208    
288    32     
-480   128    
208    96     
-176   144    
-112   -48    
224    -192   
160    -208   
-176   -608   
336    64     
-208   0      
160    16     
-160   -144   
80     16     
144    80     
-256   64     
-80    -16    
304    96     
-112   160    
384    176    
-480   80     
-240   128    
112    256    
0      192    
-368   -16    
288    80     
320    800    
-464   80     
-176   0      
128    96     
320    32     
-272   256    
96     -80    
48     176    
32     -48    
-48    128    
64     -32    
-176   240    
144    192    
-48    80     
0      32     
128    -192   
-352   -288   
0      -96    
272    -288   
-272   112    
288    16     
-80    -128   
-224   160    
64     16     
-48    384    
-256   -352   
64     32     
-32    448    
32     -80    
-576   -1376  
2272   272    
-1216  768    
-304   -48    
464    208    
-752   288    
-48    176    
960    48     
-128   -160   
-640   160    
224    -128   
144    -80    
224    48     
-352   160    
160    416    
320    208    
-448   -144   
352    128    
-416   96     
48     -208   
64     160    
32     1392   
1264   -480   
-1088  -112   
-128   -96    
1008   320    
-416   80     
-336   -448   
272    240    
-80    -272   
32     128    
176    -48    
16     -128   
0      144    
160    240    
-80    32     
-320   416    
400    -192   
-272   320    
320    -256   
-176   112    
48     -16    
16     176    
352    16     
-112   16     
272    48     
-272   192    
128    64     
16     128    
80     192    
-480   -240   
224    336    
-160   288    
-224   208    
0      16     
176    128    
160    -288   
16     -432   
-176   -48    
-160   64     
160    208    
96     96     
-80    112    
144    304    
-96    112    
-432   208    
432    0      
-432   32     
272    -192   
80     -32    
-160   32     
160    -288   
-1392  384    
1232   368    
-400   128    
-336   -32    
688    64     
-224   240    
-512   -288   
-240   160    
576    -16    
-128   112    
-64    96     
-16    128    
-112   -432   
-176   64     
288    48     
-96    304    
-48    288    
288    -32    
32     32     
-48    144    
16     320    
1232   -144   
-1136  192    
320    144    
48     96     
-432   -304   
496    368    
-288   160    
-368   -288   
432    160    
272    0      
0      112    
-304   448    
-128   240    
368    176    
-192   144    
64     -80    
-224   32     
256    -64    
320    272    
64     -224   
-656   32     
432    112    
304    512    
-48    32     
-416   80     
96     128    
-336   -16    
1696   -1200  
-2864  -496   
1440   -16    
912    272    
-608   -80    
-336   -192   
368    464    
-192   592    
80     -256   
432    368    
-144   -912   
-256   336    
128    -2368  
176    208    
-112   -176   
128    96     
48     32     
-16    -48    
-192   -384   
464    -416   
-288   -896   
-304   -336   
16     0      
656    624    
-608   432    
-224   -32    
576    176    
-368   -1120  
32     -384   
-96    -400   
224    128    
-112   -160   
192    -64    
48     112    
-288   80     
128    176    
112    -48    
-96    240    
160    -352   
-32    -128   
48     256    
304    272    
48     -384   
512    720    
-848   -3440  
-32    -640   
320    -352   
48     32     
112    448    
-208   -32    
144    128    
576    672    
-1328  208    
448    0      
400    1168   
-592   80     
96     -224   
-208   496    
16     32     
224    -848   
-144   -48    
96     32     
0      176    
96     144    
-400   208    
-144   -16    
496    -128   
-16    240    
-224   -368   
384    -192   
176    -176   
-16    64     
-144   -160   
128    144    
-144   80     
-48    96     
272    -96    
144    -128   
64     -64    
144    176    
16     112    
-576   -736   
688    -304   
-816   -48    
656    -32    
-112   -80    
-16    -32    
400    -384   
320    -80    
0      240    
80     -64    
112    -176   
-16    128    
-80    160    
80     256    
160    320    
-160   -144   
48     160    
16     -192   
48     256    
176    16     
-400   1040   
800    -400   
-896   32     
208    -80    
352    -1616  
96     -48    
-384   -496   
272    288    
-208   112    
16     80     
96     -144   
224    -704   
48     0      
-160   -176   
192    112    
48     352    
32     -80    
-288   608    
384    -624   
-112   -688   
-64    320    
-16    -96    
368    64     
-496   -432   
-128   -304   
32     96     
-16    16     
-64    -32    
560    -576   
176    512    
448    -1120  
-1552  -208   
1712   -464   
-16    384    
-1264  208    
-64    80     
768    160    
-144   -1424  
-416   -704   
256    -304   
-704   624    
416    176    
-128   192    
96     -384   
-224   -176   
48     -384   
128    -448   
256    256    
-272   96     
256    32     
-480   -752   
496    -400   
976    -432   
-1216  1296   
2832   768    
-1440  800    
928    192    
-192   -320   
-368   -432   
416    -144   
48     224    
-128   32     
-32    -576   
-272   16     
384    80     
-16    -16    
-144   -64    
-48    192    
-32    -288   
400    -432   
-208   48     
-288   -816   
-336   96     
336    -256   
-320   -32    
704    576    
-864   -240   
-176   -2048  
0      208    
96     -96    
400    -224   
-112   96     
16     -48    
-592   -16    
48     -176   
768    -272   
0      -224   
736    -368   
-544   96     
-64    -144   
304    -384   
128    144    
-176   -192   
192    128    
208    256    
-48    -160   
-96    0      
-80    -144   
416    624    
880    4512   
-1376  2288   
-16    -400   
1680   -592   
-368   32     
-512   -32    
-128   -128   
560    -48    
32     -192   
80     16     
320    -1904  
-208   -48    
112    128    
16     -288   
-144   176    
160    -48    
-592   112    
48     -176   
-144   -320   
880    -1040  
-592   -48    
320    -96    
-96    304    
-160   -144   
-400   -16    
512    176    
-352   -416   
-512   416    
336    -80    
112    144    
96     -160   
-336   -16    
80     112    
464    192    
-656   -160   
288    32     
-208   -144   
688    336    
-320   -544   
-704   192    
608    0      
-208   -48    
80     -32    
-208   -128   
-352   48     
240    -176   
-464   64     
448    0      
-560   64     
192    48     
384    112    
-928   -640   
480    -432   
-496   -224   
80     32     
112    240    
-480   -64    
-304   -48    
112    -144   
-32    -192   
-192   -192   
-240   16     
80     -16    
192    -112   
-336   -112   
80     96     
64     -704   
-208   -704   
192    -16    
-864   608    
416    16     
-112   -192   
32     -96    
-192   16     
32     144    
-32    -16    
-160   432    
208    -112   
-272   -672   
16     -192   
192    256    
-1424  336    
2528   -1536  
-992   -224   
-576   -240   
1056   224    
-224   -384   
-960   528    
384    784    
-432   -160   
32     -224   
336    304    
-1968  -384   
-128   160    
208    144    
368    -208   
-192   -208   
-144   208    
-32    144    
128    0      
48     0      
128    -480   
-1264  688    
832    -160   
-192   32     
160    32     
-80    176    
-656   -640   
-32    256    
320    32     
-96    176    
-176   -112   
96     96     
-240   -96    
160    -144   
112    -48    
-304   -176   
240    80     
-112   -608   
-176   -16    
-16    -144   
-80    256    
-176   16     
320    96     
-976   -208   
288    0      
-480   -128   
368    48     
-48    176    
-80    32     
-784   -2368  
2544   1056   
672    -96    
-2176  -880   
1328   48     
272    -352   
-896   464    
352    -176   
96     -80    
-960   -208   
48     192    
-32    176    
32     112    
64     0      
-288   112    
608    192    
-336   48     
-112   0      
-16    32     
112    176    
368    304    
-432   -480   
912    160    
-928   64     
144    -144   
704    1008   
-160   1008   
64     -208   
-32    224    
336    -32    
-80    144    
-432   80     
-208   -304   
320    0      
160    64     
-48    176    
176    128    
-304   -112   
544    64     
-224   288    
-144   0      
80     112    
-48    16     
272    -240   
-368   480    
-80    -144   
240    -224   
656    1072   
528    -416   
-480   96     
736    -80    
-288   320    
48     96     
-192   96     
-240   -448   
448    -208   
304    -208   
-384   -16    
-64    672    
320    -32    
-400   -704   
-192   96     
304    16     
-96    32     
160    320    
48     -240   
0      416    
448    -16    
-16    144    
64     272    
-144   224    
-80    -2432  
-944   -576   
336    480    
-64    -128   
336    32     
-128   -336   
-32    432    
-464   -336   
464    -944   
-224   -432   
0      272    
-96    -320   
144    256    
240    -16    
-240   544    
96     1136   
32     112    
-272   16     
368    -256   
-128   96     
-16    432    
-112   144    
528    512    
-48    -192   
-208   368    
128    -368   
-480   -48    
112    -32    
-112   448    
352    144    
-368   384    
-64    -64    
-208   -304   
32     -1040  
-288   -560   
96     144    
-320   256    
192    480    
80     -496   
-608   -384   
-48    64     
-192   -32    
80     -144   
-128   -224   
320    256    
-272   272    
464    464    
-384   -368   
-48    -256   
208    96     
-240   0      
928    416    
-192   176    
-608   64     
160    336    
-384   496    
-16    -1040  
-656   -1424  
720    -208   
304    400    
0      416    
-176   -160   
176    32     
208    96     
-144   -16    
-176   112    
-256   16     
352    -16    
160    304    
-16    -160   
304    48     
-176   176    
128    -896   
32     112    
48     368    
-32    64     
-208   288    
80     528    
-128   48     
208    0      
-128   80     
-560   688    
976    -496   
-880   176    
416    -288   
208    -224   
192    176    
-64    -384   
464    -576   
160    -160   
336    -32    
160    16     
-48    304    
-128   80     
224    112    
-96    -240   
16     -128   
160    -160   
256    208    
-96    288    
176    736    
-208   160    
0      -272   
784    -80    
-736   -848   
0      192    
-128   -112   
224    -64    
320    560    
224    -96    
-576   -336   
176    208    
224    448    
288    -112   
-16    -160   
-448   -448   
64     448    
272    -448   
288    416    
-336   -832   
-96    192    
64     -176   
224    0      
288    -544   
-256   0      
-160   -192   
160    48     
272    64     
-80    -48    
192    -432   
-1152  -1376  
416    352    
368    -432   
-816   48     
1024   -80    
-448   432    
432    -2624  
-304   448    
112    256    
-128   224    
512    320    
-160   176    
-224   0      
256    208    
432    208    
-64    -32    
-192   320    
112    96     
-64    144    
144    -256   
-16    224    
-624   -1136  
368    -512   
160    -368   
224    -144   
-224   608    
608    112    
-304   -608   
-368   -672   
560    240    
-96    -176   
224    224    
0      -208   
-288   16     
368    -448   
-80    96     
96     -864   
64     256    
32     32     
64     128    
208    -112   
16     144    
-848   480    
480    -400   
48     544    
400    240    
-64    944    
-1120  336    
-688   -144   
1200   -576   
-320   160    
-288   -672   
176    160    
144    64     
496    1024   
-336   -272   
-368   -592   
800    -656   
576    -144   
-64    -1632  
-480   32     
48     176    
272    -160   
-240   64     
-64    -48    
432    160    
-544   48     
224    -1392  
208    48     
-800   320    
48     3088   
784    704    
-1424  512    
240    -752   
288    0      
416    -32    
-688   -2112  
368    -160   
-48    96     
-720   32     
400    144    
192    96     
16     -560   
-80    48     
160    96     
-224   64     
-192   -128   
224    -144   
-128   -528   
-864   16     
1024   -272   
-512   -224   
160    -240   
112    -1584  
224    -64    
48     -528   
48     48     
224    -192   
0      144    
80     -80    
-512   -96    
448    -48    
-432   -352   
240    -112   
128    256    
352    -96    
-752   -400   
640    256    
-416   -1584  
16     288    
288    -32    
-608   80     
208    0      
32     80     
64     -64    
176    192    
352    336    
-144   96     
-304   -64    
256    -64    
-128   -176   
-320   -944   
-160   -224   
192    -208   
-32    32     
480    -624   
80     -496   
-384   -32    
112    -32    
224    80     
-112   144    
-208   112    
304    -64    
-192   -16    
-80    -16    
-304   -208   
240    -16    
304    336    
-352   144    
336    -16    
-16    -720   
-224   224    
352    96     
144    256    
-80    272    
-288   128    
416    -48    
80     -48    
-64    128    
-80    48     
1296   2960   
-2432  -336   
-576   288    
1920   -512   
-1104  48     
-96    -496   
352    240    
304    128    
-496   -1152  
48     16     
240    432    
-416   -160   
176    -32    
-64    -48    
176    -560   
-192   656    
-16    -576   
-1088  80     
384    -384   
-160   416    
-352   -1024  
576    -992   
-560   304    
448    -96    
-160   -224   
-352   64     
192    -208   
160    592    
-80    -80    
-240   32     
-48    96     
176    -304   
272    144    
-384   80     
176    240    
112    -96    
256    48     
-416   192    
144    96     
-272   192    
112    64     
-32    112    
64     48     
-144   -48    
-128   -80    
464    32     
-416   32     
160    32     
0      16     
624    80     
-2304  -928   
1296   400    
144    -272   
-1968  32     
944    224    
-288   320    
-96    304    
-64    112    
-464   -288   
288    -144   
-112   -16    
176    0      
0      64     
-144   -80    
-576   -48    
320    -128   
-112   48     
16     128    
-416   -32    
48     -32    
-304   -464   
784    176    
-1184  112    
544    -752   
-352   80     
-464   336    
-432   32     
208    -96    
80     -624   
-128   656    
-880   288    
320    -64    
352    128    
-224   -64    
-528   -112   
-144   128    
240    -336   
256    -240   
48     256    
-208   -64    
-96    -48    
16     -336   
304    -96    
208    -32    
-192   -80    
320    -496   
-48    928    
-1104  1984   
64     1184   
-240   400    
-240   -176   
80     -128   
-192   -304   
-272   256    
-928   -448   
-144   -704   
-368   448    
-272   288    
-272   -256   
240    400    
-96    144    
-80    -272   
-160   -192   
-80    -64    
-32    -48    
480    624    
288    256    
-192   -336   
-256   192    
-240   48     
1024   2496   
-704   592    
-496   -480   
2016   -336   
-1200  1440   
-528   496    
688    -288   
352    688    
-576   -384   
-320   -16    
112    0      
224    416    
96     -160   
-32    -144   
-528   384    
96     -416   
-1504  -224   
144    336    
-416   384    
320    992    
16     96     
-80    -496   
192    -64    
-208   208    
48     96     
64     1088   
-320   -528   
-352   560    
624    1040   
-432   -720   
48     -144   
-1024  288    
112    -320   
144    -368   
272    -176   
-48    624    
-272   112    
112    96     
224    -368   
-144   224    
-128   272    
-112   -320   
16     224    
96     0      
-64    -496   
-64    48     
-48    32     
336    -1072  
32     752    
-224   176    
-128   592    
-112   464    
1264   528    
-480   448    
0      576    
-16    384    
480    -80    
-288   -48    
0      608    
-304   336    
-16    32     
160    64     
128    208    
-448   32     
-80    -64    
64     -400   
-224   48     
240    496    
-480   -32    
-288   496    
-80    256    
-48    -112   
16     -128   
-64    176    
336    544    
-384   592    
416    592    
112    1088   
-32    352    
0      240    
-320   -144   
848    32     
320    624    
-448   -528   
112    -144   
-176   -560   
448    -672   
176    752    
80     1216   
-64    464    
-48    -144   
192    -352   
112    352    
80     -224   
-176   0      
320    192    
-144   352    
32     144    
112    -64    
-208   144    
-304   -432   
1136   -240   
-640   224    
256    -592   
-352   -160   
288    -448   
64     608    
128    -144   
-112   176    
-176   -672   
128    176    
304    -64    
-80    240    
-288   -560   
96     -144   
96     96     
176    112    
-432   128    
64     -80    
0      -144   
96     0      
160    128    
80     -16    
-112   240    
176    160    
-288   144    
-48    0      
240    48     
-64    -48    
560    272    
-1104  -176   
-32    496    
496    288    
-800   -112   
736    384    
336    -112   
-784   -16    
368    -528   
32     80     
-32    -112   
48     256    
-32    48     
-96    128    
112    144    
528    224    
-448   16     
192    48     
64     -304   
16     48     
-160   112    
112    336    
320    704    
-1568  -416   
-80    272    
928    -80    
-1040  48     
608    64     
-192   -64    
48     384    
592    -64    
-208   -80    
80     96     
-80    64     
80     -880   
-304   32     
336    -880   
48     16     
176    80     
-192   688    
-32    304    
-96    -32    
240    272    
-192   -560   
-576   464    
704    0      
-272   -320   
32     144    
80     -176   
-304   -160   
-720   176    
304    -48    
592    16     
-432   16     
144    80     
16     -336   
16     240    
-64    -48    
-32    -240   
416    -304   
-48    128    
-560   160    
320    96     
432    -32    
-48    128    
-304   16     
-336   224    
848    -112   
-64    -2672  
352    -48    
480    992    
-1008  -1024  
-2224  -1104  
2400   -784   
-976   -272   
96     128    
-256   16     
48     224    
368    112    
-432   -336   
288    16     
224    16     
-80    32     
48     -736   
64     128    
176    224    
80     128    
-272   128    
208    16     
-320   -288   
688    624    
80     -64    
-416   208    
176    -32    
-576   -16    
832    96     
-560   -64    
208    416    
528    -528   
-512   160    
-96    -512   
320    144    
80     -48    
16     96     
112    -64    
-416   192    
656    64     
-496   -96    
624    112    
-48    -240   
144    160    
80     -336   
-256   96     
208    -320   
96     112    
-480   -688   
560    32     
-144   208    
128    208    
-64    96     
64     400    
128    256    
32     -64    
288    -208   
-368   336    
448    528    
144    16     
-176   144    
0      -208   
176    128    
320    -1040  
-128   208    
-144   224    
304    80     
-16    208    
16     240    
32     320    
128    80     
368    48     
-240   -352   
320    -208   
-64    -256   
-160   96     
80     112    
304    -32    
-128   -32    
-48    -144   
-96    -80    
224    -1504  
-176   -144   
-1312  48     
64     16     
-368   1632   
2448   -1232  
-2128  -96    
528    -784   
528    192    
-160   -400   
-288   -272   
128    -112   
48     -480   
144    -848   
64     -160   
-64    -160   
-320   -32    
240    -336   
176    -160   
0      176    
-352   -400   
-16    -336   
176    -384   
96     -128   
-128   -1216  
0      -816   
192    -272   
-208   448    
-144   64     
432    160    
-48    48     
-32    384    
-16    16     
-16    -144   
0      -272   
48     -512   
48     -176   
-112   -160   
432    -96    
-16    -1632  
-320   624    
224    304    
48     384    
-336   -160   
-16    -64    
224    320    
-128   -128   
-144   -176   
-16    -608   
-608   48     
176    -160   
-112   144    
-32    -224   
-432   -1600  
2112   -672   
-688   992    
-944   -688   
736    -640   
-368   272    
368    240    
80     1456   
32     -448   
-96    -704   
-336   -192   
80     112    
-80    -64    
32     -176   
400    -160   
-416   96     
144    240    
224    560    
-96    560    
96     624    
112    -464   
112    -976   
-1936  720    
1536   -576   
160    -1216  
-688   -80    
416    576    
32     -144   
-448   -32    
208    80     
368    -80    
-96    -288   
-112   -192   
32     -32    
224    -16    
-96    -48    
112    64     
-48    -112   
112    80     
336    -448   
-144   -480   
-352   -352   
128    96     
-304   -384   
448    -1168  
-352   -16    
0      -160   
-160   144    
528    -368   
-192   1648   
720    736    
-480   -336   
-320   512    
512    448    
272    16     
-816   432    
-352   176    
-192   608    
912    304    
-48    160    
32     432    
272    320    
-224   320    
64     -560   
16     -80    
-304   176    
96     -80    
-16    -32    
-208   480    
320    368    
-48    -192   
-800   -2096  
-1168  656    
656    -32    
-96    144    
352    1104   
-448   -32    
-160   -128   
352    -160   
176    864    
496    -256   
-176   -64    
-320   0      
320    400    
32     -352   
240    208    
16     480    
-64    32     
-400   -48    
240    -496   
16     320    
-656   48     
-80    -64    
-176   -112   
-944   192    
-64    512    
352    0      
-528   112    
0      720    
144    1072   
64     -240   
-160   -368   
-224   -272   
-192   336    
176    -208   
-384   0      
32     -96    
96     416    
-32    576    
176    -80    
96     -624   
-304   -64    
-256   304    
240    224    
-240   144    
-768   736    
288    96     
-96    -144   
-304   -592   
-64    -400   
240    624    
-480   -320   
624    -624   
32     224    
-640   176    
368    -16    
48     -144   
-800   -576   
-416   -1088  
224    -288   
-304   400    
64     752    
32     96     
-144   160    
-48    32     
208    272    
-208   -32    
192    176    
-288   -336   
-464   -144   
384    -288   
-272   -112   
80     240    
96     272    
-192   176    
416    384    
-320   240    
-288   -592   
48     -336   
-80    64     
160    336    
720    -176   
-1424  992    
1360   -624   
-992   944    
592    192    
-336   304    
160    768    
-96    -160   
32     -512   
-240   -624   
-144   -272   
-384   -320   
80     80     
144    128    
16     448    
-112   -1360  
-224   -560   
-80    -512   
-80    -32    
160    48     
208    784    
-896   -80    
544    224    
80     -96    
-496   -400   
192    -176   
-304   -224   
208    656    
-1328  -224   
112    432    
-32    64     
-208   -96    
32     48     
240    96     
-400   -16    
144    176    
-80    -112   
208    64     
-272   48     
160    128    
-64    176    
-320   -80    
272    128    
-352   -16    
272    240    
-96    224    
-352   64     
592    96     
-368   -256   
-960   -1472  
2592   368    
1280   -384   
-1568  336    
656    -224   
560    96     
-800   -192   
-80    224    
864    160    
-944   48     
-96    112    
304    112    
16     160    
32     144    
-64    192    
-128   96     
224    96     
-32    64     
-320   -48    
192    48     
128    -80    
-224   128    
112    96     
1968   0      
-1360  576    
-960   80     
448    144    
112    -256   
-688   -112   
656    96     
-144   64     
-96    80     
-64    32     
16     32     
-64    -368   
-336   112    
544    128    
-496   -512   
288    -96    
112    -64    
-352   112    
80     96     
160    304    
-912   128    
1104   128    
-672   -128   
336    208    
48     272    
-368   272    
368    -160   
176    400    
-288   224    
-64    -176   
304    -64    
208    80     
-48    -96    
-112   960    
304    -304   
448    -816   
-208   432    
64     320    
96     -48    
-32    144    
144    -16    
-48    80     
80     576    
-192   -80    
-544   48     
768    16     
-112   144    
-1728  -2368  
2960   -1584  
16     672    
-1168  528    
912    416    
-368   -208   
-128   -80    
736    288    
-48    -288   
-1040  48     
96     -96    
416    128    
208    -16    
-304   64     
-336   112    
224    0      
64     192    
304    -128   
-480   112    
720    -32    
-1184  160    
1152   0      
-608   80     
432    -16    
384    32     
-528   -16    
512    224    
-336   144    
352    384    
-336   384    
224    448    
80     80     
-144   112    
-16    144    
16     176    
288    32     
-256   112    
224    400    
-256   384    
-48    112    
112    -32    
-256   32     
288    48     
-624   176    
448    320    
304    288    
-496   0      
-32    96     
416    320    
80     112    
-320   144    
160    112    
80     848    
608    -400   
-656   -944   
336    -224   
-16    624    
-32    288    
320    -416   
-176   -144   
-464   336    
176    144    
-16    32     
80     0      
160    80     
48     112    
32     272    
-176   272    
96     16     
-16    256    
-80    96     
-128   16     
560    1232   
176    416    
-736   416    
192    -32    
-128   176    
576    -224   
-272   -480   
-48    96     
-80    352    
864    96     
-1920  1536   
1392   -624   
352    288    
-528   688    
-16    -192   
144    1552   
256    32     
-176   80     
256    -2336  
-80    16     
-96    -64    
112    -16    
96     -128   
-128   208    
272    208    
160    64     
-224   -16    
112    208    
96     160    
560    -48    
-1344  944    
592    -672   
224    -672   
32     -528   
-32    208    
48     -1136  
496    560    
144    144    
16     720    
-80    -400   
0      -64    
48     160    
-80    -144   
-64    208    
-128   -256   
32     320    
704    -784   
-208   80     
-288   -112   
128    384    
272    -992   
96     80     
96     32     
-336   176    
192    400    
-112   192    
-160   -112   
352    -160   
-16    352    
-1408  928    
3168   -480   
-320   -32    
-1360  432    
1088   560    
448    640    
-416   -1072  
288    64     
64     256    
-208   96     
160    400    
192    96     
-208   128    
208    -400   
288    144    
-16    -112   
-192   112    
304    224    
-32    176    
-192   -304   
528    -608   
-1632  1264   
1344   -448   
-512   -240   
560    208    
-192   512    
-272   288    
560    1152   
-336   -208   
-272   -1088  
336    -464   
0      432    
-80    192    
-80    640    
-128   752    
-160   368    
416    -544   
-304   -1648  
336    64     
-112   -112   
-240   176    
-496   624    
-544   64     
-208   320    
576    768    
112    576    
368    1392   
-352   1152   
-544   1264   
704    304    
-144   -560   
-448   16     
64     -624   
576    1120   
-352   48     
-560   -208   
128    992    
-656   544    
352    560    
-80    160    
-272   64     
192    -1152  
64     112    
112    32     
-304   -192   
288    -576   
224    -192   
224    -976   
-144   -448   
192    32     
-1072  -304   
-224   752    
272    -608   
0      352    
992    -80    
-640   -368   
-528   -272   
480    -1360  
336    -1344  
64     448    
-464   -288   
-352   -464   
624    -320   
272    352    
-256   -112   
16     -288   
128    -144   
352    0      
-384   928    
32     1104   
-176   208    
64     -512   
688    -80    
144    -384   
-544   -192   
208    288    
-384   0      
320    -368   
48     -48    
-304   -272   
80     -304   
-176   -320   
-144   -144   
-272   -672   
-208   -352   
544    0      
-80    -240   
-304   -544   
16     -848   
48     -32    
192    -256   
-64    240    
48     -96    
-432   -224   
144    -720   
-528   -720   
96     -176   
-272   -752   
-224   -816   
112    -880   
-928   -336   
704    256    
704    -64    
-1264  -144   
384    0      
-272   -848   
80     176    
432    48     
32     320    
272    240    
-320   112    
-16    16     
272    496    
-672   288    
128    80     
0      -528   
-384   -144   
144    -816   
-448   -528   
160    -144   
448    -544   
256    0      
-448   -240   
64     48     
288    -16    
-304   -432   
-112   -368   
288    -256   
-288   96     
160    80     
0      -2000  
-592   512    
960    32     
-352   -112   
400    48     
-208   -128   
-176   128    
-240   112    
592    336    
224    0      
-448   -64    
-176   48     
192    -64    
272    96     
-384   400    
-144   64     
640    -608   
-432   224    
400    32     
192    320    
-320   -96    
-512   -880   
-432   272    
496    96     
-480   -96    
96     624    
-208   -80    
80     96     
128    -144   
128    -128   
-368   -32    
-272   -96    
464    96     
-16    -32    
-112   64     
0      -64    
-800   208    
-208   160    
-64    -144   
-256   112    
16     80     
-304   160    
-208   80     
-16    -32    
576    -112   
-736   -48    
336    256    
-48    48     
-320   -112   
112    -512   
320    -768   
-240   -880   
16     -112   
192    32     
-1456  -208   
544    192    
144    80     
-1424  -16    
240    48     
-240   -16    
-272   -64    
336    64     
-80    -16    
-288   -128   
512    224    
-192   128    
-288   -64    
368    16     
240    80     
-48    96     
-16    160    
-816   -656   
944    176    
608    -336   
-1600  -304   
1632   96     
-16    -48    
-352   304    
864    0      
-208   -144   
-272   160    
64     32     
80     0      
-256   -32    
-32    -48    
160    80     
176    96     
-144   -48    
160    400    
-176   96     
-144   160    
240    128    
256    -224   
-1040  96     
1216   144    
-544   224    
-608   -208   
352    -688   
128    -304   
-320   576    
0      224    
192    -208   
48     -400   
-256   224    
-656   -240   
-704   432    
624    -240   
-432   48     
240    -80    
144    -336   
-240   112    
208    48     
-256   80     
192    192    
80     64     
128    96     
-672   256    
-32    -80    
208    80     
464    1744   
-2144  4320   
160    1104   
304    -448   
-608   -240   
576    144    
-64    320    
-352   -32    
-64    176    
256    320    
-144   -16    
-272   32     
528    80     
-480   -96    
112    128    
192    -32    
208    32     
-384   -112   
-64    16     
16     352    
96     -32    
32     832    
160    320    
-368   -112   
-128   -48    
656    -80    
-688   -128   
496    -144   
-80    144    
-368   -80    
176    176    
-112   -64    
112    -96    
-112   208    
112    176    
16     96     
-496   -336   
576    -736   
-160   80     
128    352    
-96    224    
-48    32     
336    32     
-896   -416   
544    128    
144    288    
-272   208    
496    304    
-160   128    
32     -368   
-208   -672   
-224   -384   
448    -144   
-992   288    
816    80     
-496   224    
48     -64    
336    1248   
-432   1968   
32     1296   
160    848    
48     1200   
160    752    
64     288    
-48    -352   
-240   -112   
256    432    
-192   144    
96     80     
-32    48     
0      80     
80     -416   
-32    -144   
-64    -16    
352    96     
-208   272    
128    48     
368    416    
-656   64     
272    80     
176    64     
-112   128    
-256   -1232  
-128   -912   
224    592    
-144   240    
-80    208    
128    320    
16     640    
304    304    
-288   -80    
-16    368    
-16    176    
0      304    
-48    96     
64     368    
112    80     
-192   -80    
0      176    
-16    368    
192    -32    
144    -48    
-352   1104   
992    -272   
-1136  96     
624    -112   
-176   -16    
-16    240    
240    96     
-240   176    
-96    112    
192    128    
160    -128   
32     16     
-96    208    
176    176    
0      -192   
272    208    
-208   -112   
-256   -48    
208    -48    
352    112    
-80    352    
-96    96     
-64    128    
-80    -16    
240    -160   
112    32     
64     160    
80     0      
-144   144    
-160   48     
1600   -384   
-1984  288    
1280   480    
448    976    
-1296  0      
304    640    
768    1664   
-320   128    
80     -240   
32     -816   
-64    384    
144    512    
208    48     
-176   144    
32     32     
48     -16    
160    336    
-208   0      
80     32     
-32    -560   
-944   -464   
1600   -192   
-64    208    
-512   144    
864    672    
-416   368    
-32    1888   
288    672    
-192   -320   
272    -592   
144    352    
-96    368    
-16    496    
80     448    
272    -432   
-128   32     
96     -736   
-80    -1120  
-192   -544   
432    16     
0      112    
80     288    
-464   -352   
272    32     
64     -736   
-608   -80    
-464   -2048  
-544   -672   
864    -240   
-672   352    
288    48     
272    -1632  
-208   112    
-160   -896   
720    -576   
-560   352    
160    -592   
-240   -112   
-80    64     
128    -944   
64     112    
416    176    
-176   -80    
-400   192    
448    -704   
-736   336    
352    -704   
-224   32     
-192   272    
64     -704   
560    -2144  
-208   704    
304    256    
-800   -832   
32     624    
528    -208   
-272   -48    
64     384    
320    192    
-16    -704   
0      -48    
-32    -640   
144    304    
192    192    
16     128    
-64    160    
96     -112   
-480   -608   
688    -1568  
-192   -96    
64     272    
96     768    
48     -912   
-512   96     
640    48     
0      -32    
0      -432   
-16    176    
112    -48    
-144   16     
112    -32    
32     192    
32     528    
16     304    
-224   160    
240    -96    
304    0      
-448   -320   
384    304    
176    -176   
112    32     
-32    -512   
-384   -32    
0      -224   
224    144    
-32    112    
256    -1040  
-80    80     
-160   32     
272    -1296  
-144   -512   
416    -480   
-304   256    
192    400    
528    -176   
-576   160    
16     -304   
368    176    
-48    352    
384    -176   
-384   240    
272    -352   
48     -160   
-1088  -96    
384    384    
-416   16     
112    -480   
320    400    
-160   32     
-96    0      
-192   352    
368    -336   
32     -320   
-112   -80    
0      -64    
-16    96     
432    -416   
-320   -192   
-176   112    
224    -16    
-1280  32     
2752   -1648  
-656   -352   
-688   -1088  
1008   272    
368    640    
-832   128    
-96    -96    
608    -272   
-240   -96    
192    -160   
-112   -64    
-48    144    
-240   -288   
480    -336   
16     400    
-80    -352   
-16    -144   
208    32     
-32    -64    
-192   -1360  
-208   432    
864    288    
-832   96     
368    96     
48     -304   
64     -16    
-416   -128   
64     48     
336    -256   
-160   -16    
-448   -16    
144    -80    
64     96     
96     -64    
-80    -960   
-208   160    
32     -288   
80     112    
288    -96    
-304   128    
-112   -32    
112    0      
-48    -304   
-368   176    
560    32     
-208   144    
-64    -224   
-16    -176   
1264   1152   
-2608  1168   
-592   1024   
2160   -1344  
-464   -48    
32     -256   
-512   96     
576    368    
-80    272    
-208   192    
416    -48    
-576   112    
-144   -64    
-1072  208    
-192   -208   
-64    256    
288    -160   
-240   176    
160    -32    
-32    192    
-16    -48    
400    640    
-96    -720   
-1056  96     
736    -848   
288    -464   
-768   -416   
240    48     
224    160    
-128   -320   
0      32     
-32    -128   
-160   128    
272    -352   
176    -32    
-432   48     
112    -32    
-32    -80    
336    -352   
-80    -32    
-176   -16    
-64    32     
-240   -16    
848    80     
-272   48     
-336   48     
560    -432   
-16    192    
48     -144   
-352   -80    
-288   208    
544    -16    
-272   288    
256    -208   
128    432    
-752   256    
224    -16    
32     288    
-400   64     
192    -240   
-208   112    
96     -112   
112    128    
-480   -16    
-848   -80    
-256   -288   
-1056  0      
192    96     
-288   -96    
-32    -192   
1712   1600   
-2048  1552   
1120   -320   
1088   48     
-2400  -192   
-544   416    
928    -672   
48     -64    
-368   -160   
-160   -96    
544    192    
-624   -288   
560    128    
-432   -64    
-160   48     
-224   144    
448    -32    
-272   -112   
320    160    
112    720    
-240   240    
32     -240   
160    0      
-464   16     
-224   272    
352    144    
-144   -48    
160    -240   
-224   -48    
208    480    
-432   752    
128    496    
64     -192   
-80    -176   
-48    -320   
-144   176    
240    -240   
-144   -192   
-368   -192   
240    160    
32     208    
-32    80     
48     -272   
-80    -480   
-112   64     
-160   464    
448    288    
-608   736    
336    1088   
16     -416   
0      -160   
608    864    
-1280  -112   
64     -656   
208    -240   
-464   -80    
176    0      
-80    1456   
176    -896   
-272   -560   
192    752    
96     -240   
-672   -144   
256    112    
-240   -320   
96     -64    
16     0      
160    64     
-112   496    
-64    32     
128    -16    
-48    32     
0      48     
-96    112    
-80    16     
-16    -224   
160    288    
-64    48     
-480   256    
288    0      
208    48     
400    608    
-768   352    
144    -208   
752    -16    
-192   96     
0      -48    
224    320    
-288   48     
432    -304   
256    -288   
-352   416    
-128   -112   
128    0      
-704   0      
208    -48    
-224   -112   
-128   -224   
96     16     
256    48     
-32    96     
-912   480    
944    -272   
-912   -144   
320    128    
-16    480    
-32    -352   
448    -1024  
-224   80     
-416   16     
-368   112    
272    160    
32     464    
0      -48    
-128   -128   
-192   0      
112    240    
400    64     
-320   -192   
-160   16     
-16    112    
112    -16    
-112   -160   
96     -32    
-432   32     
208    -48    
432    256    
32     224    
-288   128    
-144   16     
-48    -64    
1600   -880   
-1712  272    
880    688    
-64    1104   
-736   -176   
912    -1408  
400    528    
-352   1200   
400    -928   
-80    0      
-32    128    
352    80     
-112   80     
-400   336    
224    144    
304    160    
48     800    
-464   -608   
144    -224   
-16    -32    
-720   240    
2352   -256   
-800   -816   
-944   -144   
-240   1104   
592    -640   
-544   16     
112    -528   
144    -448   
64     -800   
176    80     
0      208    
32     80     
-352   -96    
704    368    
176    64     
-208   320    
-112   320    
-464   32     
368    -48    
112    -112   
304    384    
-416   -1456  
1616   -2144  
-160   -640   
-688   368    
832    608    
-368   -80    
-96    -112   
560    368    
0      96     
-384   -16    
-64    -432   
64     224    
800    800    
576    64     
-512   -384   
656    48     
240    848    
-384   -32    
-176   160    
480    -16    
-16    112    
-272   256    
-240   -608   
432    0      
192    224    
-624   80     
-64    720    
352    -640   
992    -2336  
-752   800    
736    208    
-1056  80     
-128   368    
1008   528    
48     640    
-384   160    
80     160    
0      -160   
144    -432   
-96    -64    
-80    400    
272    16     
0      128    
-176   32     
112    48     
-528   -304   
864    -1072  
-272   -160   
112    160    
-48    336    
-736   96     
448    64     
336    16     
-336   -96    
-16    96     
128    -2048  
-128   -32    
224    144    
0      16     
-432   128    
720    352    
-320   224    
-32    272    
160    256    
96     -304   
-96    -272   
176    32     
-32    240    
320    -176   
-160   96     
32     -1104  
-240   64     
160    48     
368    64     
-480   32     
288    0      
-16    128    
48     128    
-96    -416   
816    -112   
176    -16    
-464   0      
80     256    
288    16     
-384   240    
208    -80    
16     176    
64     -336   
-80    160    
96     16     
128    80     
-288   -256   
256    -80    
-80    -352   
-144   -224   
-144   -64    
448    -432   
-80    320    
-128   -240   
144    224    
-48    -272   
176    496    
-240   -480   
32     -288   
-16    -32    
-128   208    
96     -128   
96     160    
-1024  -2352  
224    -272   
928    -144   
-1152  -672   
560    432    
384    -304   
-416   528    
-144   -1056  
-96    112    
480    -16    
-128   -144   
-64    -608   
64     144    
-144   -144   
272    -80    
-96    208    
144    -320   
96     -176   
144    256    
48     96     
-160   -1200  
-208   256    
256    -16    
-384   240    
560    0      
-192   -608   
-256   -32    
272    448    
-288   112    
208    112    
16     -16    
48     -144   
-176   192    
176    -128   
240    112    
-32    -416   
-416   256    
32     176    
352    80     
-128   -256   
96     32     
-48    -992   
-144   112    
-48    0      
-32    48     
528    80     
-448   -80    
192    -16    
-144   -32    
608    -240   
368    576    
-880   992    
1056   368    
640    352    
-1440  -624   
208    -208   
448    -224   
-64    -544   
-176   176    
288    -640   
-240   208    
-240   -32    
80     -512   
-192   -96    
704    -1120  
-352   -16    
32     -32    
-160   -464   
448    -384   
-112   -144   
-112   -688   
848    32     
-1520  0      
1040   -1072  
-112   80     
-16    -960   
-1360  -256   
96     208    
240    -208   
-208   64     
-160   -32    
48     -1136  
256    -80    
-32    128    
224    -160   
-512   -112   
224    32     
176    -496   
16     80     
-64    128    
-16    144    
48     96     
-544   256    
-304   -32    
64     448    
1008   -464   
-192   -176   
-224   176    
48     -416   
208    -128   
-320   96     
240    1184   
736    -624   
-672   -224   
224    592    
-16    -32    
-64    48     
464    -160   
-544   160    
-96    -224   
192    48     
144    -464   
32     80     
-160   -784   
-160   -16    
464    -448   
-432   192    
336    -16    
256    544    
-592   -736   
-208   1712   
1344   -416   
-1408  144    
-1152  -80    
448    -400   
640    -320   
-160   -320   
-576   240    
-304   -656   
-96    -112   
400    -352   
112    592    
-416   -48    
288    80     
48     128    
240    -32    
-432   -144   
96     -144   
-96    416    
-96    32     
-416   -48    
-144   -544   
192    288    
160    -416   
496    560    
-352   -752   
112    720    
96     240    
64     -560   
64     -736   
-16    -256   
-112   240    
-96    256    
80     -16    
256    672    
-1024  480    
-32    256    
240    1040   
0      272    
-32    -336   
-304   -32    
240    368    
0      112    
0      -64    
-272   96     
576    1520   
-688   800    
-128   -480   
0      -576   
176    -80    
-464   32     
-208   336    
1312   -512   
-336   -976   
-400   -128   
208    -768   
112    224    
-80    1408   
64     -560   
-560   -656   
272    32     
-96    -64    
144    -128   
80     -192   
-256   96     
-16    304    
592    400    
-448   592    
-80    -208   
288    16     
48     -16    
240    -80    
-48    64     
16     96     
-144   112    
-16    -288   
32     -176   
384    -112   
-432   144    
80     96     
176    64     
-608   288    
800    -368   
-1120  -160   
320    -64    
176    -48    
0      -48    
-672   368    
-96    -320   
-128   -240   
-16    32     
-48    96     
160    -128   
-64    112    
48     -112   
-128   -128   
-560   -416   
64     -144   
-128   0      
-64    176    
-48    352    
96     -288   
-80    0      
448    -128   
-560   96     
-64    192    
48     464    
-656   -208   
48     -448   
-288   32     
-32    48     
0      -80    
160    192    
-128   400    
112    304    
16     48     
-400   96     
-64    704    
560    192    
-320   -336   
-464   -256   
96     96     
-112   112    
-128   144    
128    -480   
-288   -80    
-272   112    
672    64     
272    -384   
-640   -48    
-848   -1200  
-400   -640   
608    -64    
-656   16     
-528   320    
768    416    
-768   848    
-720   192    
528    0      
-592   -64    
-224   160    
-48    -128   
112    -16    
96     -304   
-112   -32    
-16    80     
-144   -128   
16     64     
0      -96    
-176   96     
-224   -608   
1264   448    
-896   32     
-16    -160   
96     48     
-48    16     
-160   -224   
96     112    
176    144    
32     -352   
-912   192    
464    32     
128    112    
-272   128    
-208   -32    
128    32     
192    304    
-256   -128   
32     96     
96     -80    
-176   176    
32     48     
-64    240    
1008   -224   
-784   16     
-112   -1040  
-144   -80    
-144   -784   
-80    -656   
464    176    
-96    240    
128    256    
-304   -272   
64     16     
144    144    
-432   -208   
-816   -304   
-144   672    
144    -48    
80     96     
-48    48     
-96    128    
96     128    
208    112    
-304   -112   
240    48     
160    -32    
128    96     
-176   48     
-304   -1696  
-1248  -4176  
-832   -960   
416    64     
-64    0      
496    80     
560    400    
-832   160    
-112   288    
288    -544   
80     432    
-336   64     
-400   176    
144    -32    
32     64     
-208   -224   
-304   256    
144    32     
32     64     
128    -256   
-752   32     
544    -112   
-544   80     
528    64     
608    112    
-624   80     
-512   80     
784    320    
240    -64    
-592   64     
128    32     
240    -32    
32     176    
-112   112    
-112   128    
256    320    
352    224    
-192   224    
-128   320    
64     48     
-144   192    
256    -48    
-496   32     
48     -48    
256    16     
-240   -48    
-320   -32    
176    16     
272    112    
48     64     
-64    64     
-176   96     
160    384    
-896   -32    
192    -896   
-544   -304   
448    -256   
-512   -144   
-352   -32    
544    352    
176    80     
-368   112    
208    144    
-80    80     
160    176    
-48    80     
-48    -16    
80     256    
-176   160    
-144   -160   
368    224    
-16    80     
-112   48     
160    -240   
80     64     
16     336    
-576   -144   
336    -1024  
48     304    
-16    416    
128    -224   
496    1664   
-672   -1824  
-960   576    
1872   -272   
-880   0      
-320   720    
720    192    
48     96     
-304   -208   
-48    -80    
320    -32    
-304   400    
432    -128   
-64    368    
-336   -32    
224    16     
80     176    
-32    -304   
-192   32     
160    320    
-192   384    
624    1552   
400    -560   
-1168  -880   
544    -176   
-112   256    
176    240    
80     -240   
80     -528   
-320   128    
384    272    
192    128    
-208   304    
0      -16    
80     304    
144    80     
-48    80     
-368   -64    
80     -336   
16     96     
96     -512   
-192   32     
304    80     
-176   48     
-80    304    
576    96     
-592   48     
272    32     
80     0      
352    -144   
-2000  -352   
576    128    
2048   -544   
-1728  -192   
1552   448    
-320   -352   
-576   432    
416    448    
96     -256   
256    240    
-192   112    
96     288    
-32    0      
208    208    
32     208    
-128   320    
64     400    
-32    96     
192    -128   
16     0      
-144   -592   
-432   208    
2000   -1072  
-368   880    
-496   144    
16     -256   
528    -128   
-224   80     
128    48     
-128   48     
208    144    
80     -240   
-128   112    
-16    -352   
400    128    
-48    -208   
0      112    
-16    -560   
-16    -16    
288    288    
256    224    
-48    144    
192    320    
128    272    
-400   -160   
272    -288   
32     416    
-656   160    
16     -208   
720    864    
-736   144    
288    224    
48     -240   
64     448    
-960   -240   
640    -240   
-80    544    
384    96     
-176   -48    
-240   240    
288    80     
288    -144   
-64    112    
-192   -48    
80     32     
-256   16     
592    -208   
-496   32     
-160   -416   
384    -96    
1472   2704   
-1776  1632   
656    -608   
496    -480   
-976   -48    
-16    -16    
96     -432   
272    -896   
-32    -608   
112    448    
144    80     
192    -256   
-128   -368   
0      784    
-288   -384   
240    16     
272    816    
-176   -160   
-16    -96    
176    -48    
112    -448   
-32    -320   
-336   -160   
208    -832   
16     -144   
-32    144    
-112   192    
96     32     
-256   96     
336    -16    
-64    -144   
208    -32    
64     -208   
-80    -208   
160    -32    
192    -336   
-160   -320   
128    -1344  
144    1008   
320    144    
-32    -688   
-272   288    
-80    -48    
256    -848   
416    192    
-416   -336   
-112   128    
416    -144   
144    -272   
-1408  336    
80     -128   
48     -816   
-240   -16    
336    -576   
-112   -1984  
-16    -1456  
16     432    
-96    -336   
-208   848    
-32    1216   
32     -480   
256    -256   
64     64     
-224   -400   
-208   64     
256    96     
-32    160    
80     -112   
64     -48    
-160   -608   
320    -80    
0      -1696  
144    -176   
-128   64     
144    96     
96     -16    
-816   -272   
-128   -240   
416    48     
128    -48    
-288   96     
-832   416    
1184   -368   
-560   400    
112    -144   
-208   -368   
-80    -1296  
-368   304    
224    -112   
-128   -256   
-272   -224   
160    160    
112    144    
-64    -32    
-160   -32    
-80    -208   
-848   -96    
368    -112   
0      -64    
-80    -64    
-64    624    
-112   -400   
464    32     
256    -1680  
-144   -368   
-240   -176   
400    -608   
224    480    
-64    736    
-64    432    
-64    -448   
256    -176   
192    -80    
-496   -592   
48     400    
-96    -112   
64     -720   
0      48     
-16    -1296  
-176   464    
96     -80    
288    -320   
-80    -64    
-192   80     
160    192    
-288   -144   
144    -64    
192    -16    
-448   0      
496    352    
-1296  -832   
640    352    
16     512    
-864   -848   
1568   240    
-208   -384   
-992   128    
640    -64    
0      -32    
-160   -272   
96     128    
-32    0      
-16    16     
16     -336   
256    -80    
-32    -32    
0      -112   
80     496    
176    112    
-16    16     
-208   16     
-592   -528   
1296   -464   
-416   176    
-496   -224   
848    272    
-48    -128   
-112   -320   
-560   224    
160    -96    
0      48     
224    -192   
-16    32     
-400   -256   
-112   160    
464    -16    
-144   32     
96     0      
-32    -160   
48     -304   
192    32     
-176   96     
-384   -496   
288    -224   
-400   192    
-784   128    
-400   -704   
288    -352   
128    464    
64     48     
-64    144    
352    -16    
160    -48    
-624   288    
-672   160    
-240   -192   
480    -352   
272    -80    
-624   -144   
-288   -64    
160    80     
-16    -16    
336    48     
-400   192    
-288   -96    
32     304    
576    -96    
-544   448    
-32    -64    
864    1040   
-3376  144    
352    592    
608    -368   
-1392  -176   
1136   32     
336    80     
-608   -128   
48     -64    
192    320    
-512   -16    
288    128    
-144   -176   
-224   144    
-96    16     
-208   80     
208    -176   
-448   -112   
-208   -128   
304    -96    
608    -960   
-432   256    
432    -336   
-752   64     
-256   16     
592    64     
-320   96     
128    128    
-128   64     
-240   336    
240    0      
-112   16     
224    -16    
-512   48     
448    80     
-768   -16    
832    96     
-256   -16    
16     -160   
160    48     
-16    160    
0      -80    
-224   -16    
352    -32    
16     -64    
-576   0      
208    48     
160    -208   
-240   -112   
96     240    
-496   -224   
656    160    
-48    -336   
368    -144   
-816   112    
432    0      
80     144    
-288   96     
0      64     
-480   112    
368    -160   
160    32     
144    80     
-464   -144   
0      224    
48     -64    
96     -64    
80     -48    
-160   80     
-48    32     
-240   -176   
192    -144   
32     192    
-64    80     
288    16     
-48    256    
-240   176    
-160   160    
-16    -240   
256    864    
-384   784    
-544   -528   
1744   864    
-432   640    
-736   240    
16     112    
-320   -272   
400    176    
208    96     
48     480    
-576   512    
128    -240   
368    -80    
-96    240    
-96    16     
-96    256    
304    -272   
-112   256    
160    240    
-288   16     
64     96     
160    96     
16     -1184  
-608   544    
544    -480   
-336   -320   
80     416    
304    -80    
-352   432    
-336   256    
80     336    
528    112    
-64    -16    
-304   32     
-16    112    
-64    32     
304    304    
80     176    
96     48     
-368   240    
112    112    
96     -192   
-112   -160   
432    -240   
-464   -16    
336    256    
-112   272    
-16    304    
-32    32     
144    0      
144    0      
-912   16     
1680   -1088  
-720   512    
464    224    
-224   320    
-496   -32    
496    464    
-192   784    
48     400    
160    256    
-400   192    
96     144    
32     128    
32     -160   
224    -80    
-112   -144   
16     144    
224    256    
-208   192    
48     112    
-16    0      
416    16     
-2048  720    
1216   768    
-48    160    
-896   -144   
1072   768    
-1104  1040   
112    48     
304    -256   
96     144    
272    -80    
-544   -48    
-64    -32    
368    0      
64     464    
112    272    
-96    160    
-96    640    
256    464    
64     240    
-48    144    
0      304    
448    1744   
-896   1472   
-224   784    
672    336    
-224   256    
384    112    
272    48     
-144   -800   
-192   -1344  
96     176    
224    272    
-224   -368   
848    32     
368    736    
224    -96    
352    -800   
-256   -144   
32     64     
-176   -80    
208    144    
-192   256    
208    256    
-80    -352   
336    -880   
448    432    
-240   -96    
-32    16     
384    96     
-224   -1536  
-1552  432    
-32    -320   
464    528    
1040   320    
-880   -224   
-528   -1520  
80     -304   
352    352    
208    -640   
-32    144    
-336   224    
-64    384    
288    -192   
176    544    
-368   160    
-160   -64    
144    -272   
160    -304   
-32    -896   
-416   -752   
64     656    
368    432    
256    -112   
-736   368    
352    240    
-144   -400   
400    -1840  
128    1040   
-80    80     
-64    464    
-80    -160   
208    240    
-32    448    
-192   736    
64     -608   
640    64     
-192   432    
-16    208    
80     160    
-48    -320   
256    -128   
-112   336    
112    256    
-176   -1472  
416    -496   
160    560    
-304   224    
-288   -448   
-80    -192   
432    320    
272    992    
544    640    
-496   160    
336    208    
240    16     
-208   96     
208    -1424  
-336   -1632  
48     -176   
16     624    
64     -96    
64     192    
64     -48    
160    272    
-208   800    
112    432    
384    288    
112    -576   
128    464    
-288   224    
160    -240   
336    -368   
288    0      
80     -576   
272    1008   
-288   -176   
288    -928   
224    -352   
-224   256    
320    1152   
-720   1152   
64     80     
464    -1072  
-64    -1632  
-160   272    
640    688    
160    336    
-176   416    
32     -80    
64     208    
224    -320   
192    -48    
-240   528    
-208   -16    
48     128    
352    -832   
-240   288    
16     -160   
48     160    
560    592    
-608   928    
560    -512   
-240   448    
-16    -64    
-96    224    
192    224    
80     -352   
-128   32     
192    -48    
-80    144    
-144   -80    
176    -368   
48     -448   
-128   -784   
704    368    
-544   528    
-144   -912   
32     -208   
112    -176   
-144   -384   
32     64     
368    -1136  
-80    240    
-272   -528   
-16    192    
-384   -208   
48     -288   
-128   -80    
-480   -416   
-272   768    
2272   576    
-928   176    
-1008  -400   
1328   16     
432    -1024  
-784   -32    
496    176    
-128   16     
-304   48     
480    -320   
-544   64     
-48    -112   
-176   -48    
432    -80    
0      96     
416    -464   
-272   160    
0      48     
160    32     
32     16     
-688   -208   
928    -448   
-416   -112   
-240   -144   
-240   -48    
-208   -64    
192    -352   
-224   -64    
176    -16    
-112   -208   
112    -416   
224    -16    
-144   -2000  
-208   32     
400    -16    
-96    -32    
272    32     
-160   224    
224    -256   
-16    -80    
-432   -64    
1184   -32    
-1248  -96    
-1184  -304   
768    -560   
-256   224    
-112   464    
464    416    
-32    -256   
-768   -112   
208    192    
384    -192   
64     -192   
32     -256   
-416   -240   
-80    -368   
448    -48    
-400   -144   
-560   16     
-768   80     
1312   256    
-608   240    
-496   -608   
-208   -16    
688    -2208  
768    -48    
-768   352    
640    32     
448    192    
-2592  2800   
1280   -240   
-368   1152   
-224   -480   
-432   -176   
48     576    
-96    -128   
-384   -304   
-208   -496   
368    0      
-112   -256   
272    48     
-160   32     
-240   -112   
64     96     
592    -80    
-240   -96    
48     64     
512    624    
-1120  48     
592    448    
256    -576   
-304   144    
848    -16    
-800   160    
496    -192   
48     32     
-32    -16    
-352   -208   
384    -80    
-416   -176   
528    -32    
-288   -16    
48     48     
240    -80    
0      -128   
-560   -288   
528    240    
-80    -112   
-192   80     
192    -400   
-112   -96    
-128   0      
-112   96     
480    128    
-144   -80    
-208   -32    
-16    -304   
288    -464   
-144   -384   
-160   -64    
0      -672   
-704   320    
672    -448   
-832   304    
-992   -848   
144    -64    
-240   192    
112    336    
-80    -32    
128    48     
-144   -16    
16     -80    
144    112    
-48    224    
-112   64     
32     -112   
48     -64    
-448   -176   
448    128    
-112   144    
-368   -160   
144    -368   
-96    -96    
-16    48     
-352   160    
160    144    
80     48     
208    -48    
-240   -192   
-496   -912   
848    -2064  
-1136  272    
1104   64     
176    272    
-1216  -64    
384    672    
992    592    
-688   240    
-592   -80    
48     256    
528    224    
-64    96     
-240   -240   
-240   -592   
368    624    
-320   784    
128    528    
-112   400    
0      208    
32     -16    
-176   1696   
288    -240   
-800   1488   
624    304    
-160   -256   
48     -1184  
-464   -560   
368    832    
-336   256    
32     16     
-16    -48    
0      144    
16     144    
48     -384   
-112   -48    
-240   208    
16     -176   
-64    224    
160    -160   
-80    -144   
-48    256    
-176   48     
176    0      
-256   -176   
64     320    
112    -112   
-112   0      
160    128    
-48    0      
1424   928    
-1520  688    
-1440  -704   
2384   -64    
-960   144    
-1168  432    
1040   1280   
-224   1216   
-384   1008   
208    -368   
-96    32     
-112   -112   
128    32     
208    96     
-496   16     
16     288    
176    256    
-80    0      
48     -64    
-48    80     
-176   160    
160    704    
2752   128    
-2096  976    
-128   352    
928    336    
-832   -208   
0      -240   
272    336    
-160   -16    
-144   128    
384    128    
128    544    
-160   432    
-64    272    
176    96     
96     80     
144    480    
64     224    
-928   -752   
416    -336   
-544   -640   
-176   -656   
144    -128   
80     64     
-288   1936   
800    960    
-128   -592   
-608   496    
544    -256   
-448   -400   
48     -432   
-752   304    
608    80     
-224   -64    
304    192    
480    32     
-1328  -640   
672    -1232  
-64    -32    
288    128    
32     -80    
-416   -48    
336    -480   
80     192    
160    96     
-496   -32    
112    928    
320    672    
-240   16     
-352   -576   
1136   -1344  
-336   -352   
560    272    
-176   816    
-624   528    
528    112    
624    -416   
-16    -528   
-416   -304   
0      432    
432    -272   
208    208    
-384   320    
16     224    
-192   368    
16     -64    
0      -16    
-128   128    
128    784    
128    400    
-16    -128   
-272   -336   
112    672    
512    -288   
-848   32     
496    80     
-272   560    
448    1856   
-48    1200   
-208   -464   
304    -112   
112    -192   
0      160    
-64    96     
48     112    
-16    -240   
512    -784   
-64    -144   
-288   -256   
240    144    
112    480    
128    512    
-368   160    
96     -208   
224    320    
16     128    
480    -272   
-336   624    
32     16     
-32    -304   
-80    -1328  
64     -192   
-16    1120   
-256   -1264  
-1984  704    
1600   -320   
-640   -240   
-240   -1856  
80     32     
400    320    
32     224    
-176   80     
160    336    
-80    720    
96     208    
-32    176    
-240   -16    
48     32     
688    544    
-848   144    
80     112    
336    -96    
64     -432   
-272   64     
16     -144   
80     -928   
-128   -592   
128    304    
-96    304    
128    48     
256    2208   
1408   80     
-1232  -96    
448    400    
80     448    
-64    688    
-192   256    
-320   -608   
-32    -480   
176    -32    
-32    -400   
16     240    
256    320    
-352   352    
304    -112   
-272   240    
160    368    
-48    -320   
96     96     
-256   -48    
544    1472   
-16    64     
-496   -240   
896    0      
-288   -784   
0      48     
48     240    
352    336    
-368   0      
-192   48     
480    16     
48     256    
-240   -16    
-16    112    
80     -16    
64     -64    
224    96     
-304   -16    
192    -48    
-32    -560   
416    32     
-64    96     
176    224    
-240   -48    
16     256    
32     96     
272    128    
-64    48     
-176   368    
1440   32     
-3680  720    
224    -32    
1520   -144   
-688   -144   
-432   -368   
128    352    
688    -928   
-352   16     
160    -80    
272    160    
-160   48     
64     48     
80     -96    
-320   16     
304    112    
-48    -128   
128    272    
112    -96    
16     -16    
-16    -256   
176    32     
-1440  -320   
880    256    
368    848    
336    -208   
-400   -256   
272    144    
-432   272    
-128   192    
288    16     
592    -32    
-144   64     
-320   16     
192    144    
-80    -288   
80     144    
0      -160   
240    -96    
80     16     
-816   112    
464    -256   
752    128    
-64    -16    
-272   -832   
-32    -48    
-912   -640   
96     -16    
240    -608   
-16    608    
464    -432   
-160   0      
576    -608   
-240   416    
-240   -272   
64     -96    
800    -528   
192    112    
-400   176    
-240   -448   
416    240    
32     -80    
-32    128    
256    -112   
-64    112    
-32    -240   
-16    112    
-240   0      
208    160    
-64    -608   
1472   -6288  
-2992  -1424  
992    -1584  
1152   304    
-480   96     
-32    -192   
288    80     
-448   432    
512    -160   
-176   208    
352    -192   
-80    112    
-64    -48    
208    -2048  
-192   48     
320    -1456  
-80    64     
288    -384   
-128   -320   
-80    -368   
-208   -720   
112    -64    
-96    -272   
-544   -272   
16     -1008  
576    208    
-96    32     
-144   -80    
112    -112   
224    -16    
112    -320   
-112   224    
-112   208    
464    80     
-1360  -208   
-160   -288   
416    -128   
192    -32    
-112   0      
64     -128   
240    -80    
80     -1264  
32     48     
176    0      
-384   16     
96     0      
64     -80    
-192   -208   
-16    -224   
-32    -176   
128    -16    
176    832    
-432   144    
144    32     
-192   -896   
256    -1152  
-32    -752   
-288   32     
224    64     
48     144    
-64    -32    
416    240    
-192   -128   
-288   -48    
464    -592   
-128   -368   
-800   -928   
-32    -400   
144    -544   
-112   -608   
0      -288   
-16    -848   
96     -64    
-16    -48    
-32    224    
48     144    
336    640    
-112   720    
-16    -416   
112    -336   
16     -288   
-1216  -1584  
1008   -1072  
-784   0      
-384   48     
688    464    
-416   -976   
-48    112    
192    -2720  
48     160    
-112   272    
96     -112   
-144   112    
-80    16     
0      160    
16     0      
-272   48     
-176   -272   
-112   656    
0      -16    
-96    160    
736    -304   
-1152  848    
832    -800   
144    16     
96     16     
16     144    
-320   -176   
112    752    
-288   912    
-80    128    
208    -256   
-144   96     
-96    -368   
96     -736   
240    224    
160    -464   
-160   16     
-144   -208   
304    0      
-384   144    
-80    0      
-112   0      
-16    288    
80     -144   
112    -208   
-336   -192   
-32    144    
-1120  160    
80     -240   
288    48     
-1328  1488   
3344   -944   
-1136  -160   
-640   272    
992    208    
-128   64     
-80    272    
176    1136   
-400   -1264  
-80    -208   
144    368    
-96    96     
-224   32     
176    32     
176    240    
-656   224    
-80    208    
112    480    
-256   -384   
128    48     
-16    -816   
-1936  1248   
1584   -544   
-752   48     
640    -32    
-288   192    
256    208    
-160   1504   
192    1520   
208    528    
-304   -192   
160    -480   
-96    -496   
-432   -688   
752    144    
-928   -32    
80     -256   
-96    -976   
-144   -848   
-64    -544   
-64    160    
112    32     
-144   336    
-464   -656   
464    -48    
352    352    
-816   336    
-128   400    
544    -128   
-576   144    
-176   -64    
224    432    
-288   -32    
-32    32     
-160   432    
144    720    
16     -416   
256    -400   
-608   -416   
-80    48     
-80    32     
-96    -48    
-64    -736   
-448   -432   
288    368    
-448   -256   
16     240    
-128   -96    
48     -16    
-224   -32    
-576   2800   
768    -80    
-784   80     
-96    -160   
1040   1616   
256    672    
-400   944    
128    560    
0      48     
224    -944   
-160   352    
-16    272    
-128   80     
32     -96    
112    -352   
-192   304    
-624   -112   
-64    96     
368    224    
-16    592    
-240   0      
176    224    
96     -208   
-560   -1216  
-448   -320   
-80    -416   
-208   288    
176    -48    
-96    16     
0      96     
-256   320    
192    112    
-96    -16    
-64    -144   
-96    0      
64     96     
224    288    
-144   256    
48     272    
-48    240    
128    416    
-32    176    
-432   -448   
-32    -240   
0      -16    
256    144    
-464   400    
320    368    
80     224    
-304   -48    
80     16     
480    864    
-960   928    
-160   176    
592    -32    
-80    -992   
-704   -432   
-48    240    
496    144    
32     48     
-192   448    
-128   176    
-96    224    
-144   176    
320    80     
-48    80     
-608   192    
384    -320   
128    -112   
-96    448    
-304   272    
288    -64    
-384   -16    
192    96     
160    -128   
-400   160    
96     -144   
48     -112   
64     176    
16     48     
1120   2848   
-2512  -352   
-448   96     
1760   -560   
-944   -112   
336    -528   
-192   224    
176    -128   
384    -512   
-432   464    
0      -144   
-256   320    
432    96     
-176   256    
-192   -192   
240    432    
-416   -96    
128    128    
320    96     
-288   -48    
-464   -496   
832    -1008  
-768   576    
768    160    
-64    96     
-624   128    
320    -576   
48     528    
464    80     
-784   272    
96     16     
224    96     
-64    96     
320    -64    
-288   -240   
-160   48     
48     160    
128    48     
-464   208    
496    -80    
-144   160    
-208   16     
-48    64     
64     -64    
368    -32    
64     32     
32     320    
64     80     
-272   64     
48     -368   
224    -368   
224    -704   
144    -288   
-288   32     
-1376  -80    
704    224    
1040   -144   
-416   64     
240    -80    
-240   192    
32     128    
32     80     
48     48     
-160   240    
576    224    
-336   112    
208    16     
-64    112    
112    -112   
-96    176    
-16    -1280  
240    512    
832    -288   
-576   32     
1072   -208   
-1088  -336   
272    96     
544    32     
-144   -64    
-272   192    
432    16     
160    160    
-224   64     
16     96     
-80    48     
464    -320   
-80    96     
-208   -128   
48     32     
-32    224    
112    112    
160    192    
416    -160   
-832   272    
1376   -64    
-240   160    
-352   -176   
-768   -416   
752    176    
272    -112   
-416   -768   
464    176    
-32    128    
-208   208    
144    528    
400    80     
256    -16    
112    640    
-384   -48    
-96    224    
688    -16    
-128   48     
-288   32     
128    176    
176    64     
192    224    
-96    16     
-288   -1152  
208    160    
272    -240   
-1072  3200   
1360   304    
-1392  -384   
-400   -624   
1008   0      
-96    112    
-272   336    
-656   336    
448    80     
160    128    
-272   -224   
208    112    
-352   -16    
144    320    
384    -80    
-384   352    
-224   -240   
384    112    
672    528    
-752   1872   
144    560    
144    -208   
-176   -448   
544    -16    
336    320    
-1120  32     
576    0      
288    -272   
-256   0      
-304   -480   
352    -160   
432    -48    
-848   -64    
224    -192   
352    -112   
208    576    
-512   400    
192    160    
128    -112   
-80    32     
240    -240   
-368   16     
112    -224   
304    -64    
-704   -912   
448    16     
-144   96     
400    80     
64     0      
-528   -480   
-192   -512   
144    -1312  
0      -32    
352    432    
-192   368    
368    -368   
544    224    
-144   -80    
-160   -304   
-160   -1664  
416    80     
48     736    
-16    416    
128    352    
16     352    
160    -144   
16     448    
304    176    
0      -496   
-80    0      
112    -192   
128    128    
160    -320   
-32    128    
-32    -224   
176    320    
80     528    
112    1200   
256    352    
224    -1136  
-80    -160   
-704   -64    
864    -224   
-432   -32    
-448   80     
32     0      
176    -32    
80     -416   
304    32     
-16    -64    
-96    48     
208    32     
80     -448   
-288   -16    
-32    -1584  
288    -624   
192    -224   
-32    -48    
-64    272    
-112   -1312  
-208   -480   
1136   -496   
-48    528    
-112   112    
-528   640    
464    -272   
176    64     
-128   112    
48     -64    
-448   -416   
176    -272   
-96    192    
32     -640   
-256   -256   
48     -672   
64     208    
-80    -1808  
160    -96    
64     192    
0      -32    
32     48     
192    160    
128    -144   
-128   128    
-32    -336   
-160   -256   
-928   -304   
-176   320    
624    432    
-272   512    
1552   656    
-2448  -304   
-752   -448   
1520   -1488  
-496   -368   
-512   -784   
-80    -96    
-16    240    
544    -1904  
112    544    
-256   288    
-400   208    
288    -128   
-208   288    
-288   -352   
-208   0      
112    -816   
416    16     
64     -864   
0      240    
-256   -432   
1456   448    
-1472  -176   
-240   80     
784    1136   
-752   1328   
-800   1168   
992    1152   
-1120  672    
-480   944    
544    224    
-144   -400   
-64    -480   
496    -592   
-144   -432   
96     176    
112    80     
-128   432    
576    288    
-112   -80    
-208   32     
96     48     
224    160    
-256   48     
-352   1568   
1264   -160   
-352   -1056  
496    -992   
80     64     
-240   -768   
-320   -816   
64     192    
224    352    
432    256    
-32    208    
192    480    
-176   -80    
-144   144    
576    -432   
-480   256    
-112   64     
-64    64     
96     -336   
144    -464   
-16    256    
-144   -464   
288    128    
496    -64    
-576   -912   
-352   -208   
-608   1440   
416    752    
-608   -480   
-448   -496   
1776   928    
-816   240    
-240   -32    
608    -96    
32     32     
96     256    
160    -352   
-320   -192   
128    48     
368    -160   
-288   -16    
192    -80    
-272   112    
416    144    
-448   944    
432    1520   
-432   976    
-112   -384   
464    32     
-416   -48    
-192   192    
384    -208   
-1280  -288   
480    64     
-560   208    
544    368    
-224   0      
-16    384    
-112   32     
48     -80    
128    -256   
-48    0      
-1136  -192   
336    144    
48     -32    
-128   80     
-176   16     
208    80     
-464   -160   
304    32     
16     96     
-1232  -48    
-144   -32    
256    16     
32     64     
-272   -144   
-304   208    
-80    160    
96     -96    
-496   -240   
-320   128    
192    -320   
-272   -48    
112    144    
16     432    
304    -144   
-416   176    
-144   176    
336    -208   
80     -96    
-192   48     
-272   -16    
208    -576   
144    272    
-320   64     
176    -80    
-224   192    
96     16     
-16    112    
144    -32    
-176   -112   
-352   240    
64     96     
80     160    
0      64     
-224   -160   
1440   1856   
-3184  64     
-112   -48    
1840   96     
-2112  416    
624    -160   
-128   32     
256    -288   
-144   464    
128    -96    
-208   208    
-208   176    
-16    -96    
304    304    
-1184  48     
464    0      
256    -304   
-224   64     
32     48     
0      144    
-304   -656   
672    -976   
-848   576    
544    320    
400    -48    
-624   16     
176    -16    
368    -80    
160    -176   
-304   16     
288    128    
-144   96     
48     -192   
0      48     
-400   -128   
240    80     
272    -192   
-496   208    
336    0      
-128   272    
112    -112   
-368   144    
96     -64    
-208   16     
208    -32    
-208   16     
-160   160    
288    -64    
-288   48     
-384   -608   
880    -704   
352    272    
176    -48    
-512   -256   
288    224    
-224   -32    
80     368    
336    -176   
-576   128    
-464   -176   
224    224    
320    32     
-208   64     
16     208    
352    80     
-80    208    
32     -112   
32     336    
80     96     
256    336    
-160   240    
-80    288    
1536   -224   
-736   224    
128    -208   
-256   144    
-160   128    
800    384    
-1168  336    
192    -160   
144    128    
128    16     
48     64     
-176   208    
-160   -48    
240    160    
160    -64    
-112   -416   
272    192    
-224   304    
16     0      
176    32     
-704   80     
544    176    
64     -32    
-272   48     
-160   -144   
560    -32    
-192   272    
-144   0      
320    0      
112    160    
-464   0      
80     80     
192    -80    
240    208    
-288   160    
160    400    
272    -48    
-384   96     
416    80     
-128   64     
-128   112    
128    -160   
-16    80     
112    288    
-176   128    
-16    16     
-64    -320   
816    -336   
-1680  -912   
656    768    
-32    -80    
-416   64     
1408   192    
-384   -96    
-640   496    
128    -240   
288    -224   
80     -48    
-80    96     
-304   -16    
336    208    
128    -192   
-304   192    
-272   -64    
96     32     
240    48     
528    576    
-864   656    
368    160    
-80    -480   
-176   -176   
848    16     
-208   304    
-96    80     
240    272    
-16    288    
-448   -2112  
32     -352   
496    16     
96     928    
-336   80     
-176   -32    
432    256    
-256   16     
432    928    
96     672    
-256   272    
368    0      
-80    -96    
0      96     
-192   -384   
464    -160   
80     800    
-160   1280   
560    496    
-832   -1344  
176    -208   
480    976    
16     32     
-400   -736   
480    -208   
-432   -1472  
-240   -768   
560    -192   
-304   160    
96     -160   
144    -624   
-80    96     
-64    144    
-48    -240   
16     16     
144    224    
64     -144   
32     176    
192    128    
656    64     
-368   64     
208    0      
-224   16     
352    -32    
-96    224    
128    -816   
-96    144    
96     320    
48     48     
96     272    
16     96     
80     0      
128    96     
16     -576   
-496   288    
-32    80     
112    96     
48     272    
-192   -480   
224    -608   
48     64     
16     224    
112    -352   
288    0      
-240   48     
-32    240    
-320   320    
528    -416   
-384   -128   
128    480    
80     288    
64     128    
-80    -96    
336    112    
432    304    
-736   -208   
192    64     
64     -1040  
80     -16    
-208   -496   
80     352    
-160   -256   
-144   96     
480    304    
128    48     
-224   -224   
288    -16    
80     384    
-144   -48    
-160   720    
-96    0      
-48    -288   
240    -432   
0      -176   
128    -1312  
32     -96    
224    -736   
-32    176    
176    -64    
-128   -256   
336    64     
-160   560    
1200   48     
-2704  240    
80     16     
48     112    
288    128    
-224   -144   
-336   656    
128    -384   
944    -1712  
-208   -272   
-416   1120   
-64    96     
48     -304   
496    -64    
-64    240    
-448   368    
96     0      
448    -96    
-64    -336   
-176   432    
-272   -480   
1280   1056   
160    -272   
-800   288    
1232   144    
-240   416    
96     0      
-336   912    
720    -352   
-352   -560   
-176   0      
288    -208   
224    480    
-112   -48    
-224   96     
672    -192   
-272   192    
64     -240   
-368   368    
48     32     
160    0      
112    -224   
320    -640   
400    -1488  
80     832    
-784   -1504  
80     -272   
208    144    
0      32     
336    528    
-992   256    
224    -160   
160    112    
-32    -384   
-256   112    
-128   96     
1024   784    
-736   -16    
-352   -528   
224    -16    
-112   -112   
32     -224   
32     -336   
-464   -320   
432    -384   
32     -16    
80     -96    
-32    48     
-192   -288   
176    944    
1552   -2464  
-2688  -1200  
960    448    
592    128    
-64    160    
-304   -224   
-80    -528   
512    336    
304    -320   
-96    -672   
96     -96    
16     304    
-128   -32    
704    -208   
-160   -16    
-272   -16    
-64    128    
128    32     
144    96     
-96    -432   
-400   32     
624    -80    
-368   48     
400    32     
80     -256   
432    -368   
-224   -2096  
-144   -128   
256    256    
-208   96     
432    224    
-192   64     
-16    -48    
144    -80    
-368   16     
0      -320   
-672   64     
320    64     
-80    272    
-256   -1136  
96     16     
384    -1136  
-464   144    
112    160    
-368   32     
192    -48    
416    0      
-128   240    
16     48     
-224   48     
336    -32    
-240   -256   
208    -528   
-240   0      
640    384    
608    48     
-896   -288   
608    -96    
0      -288   
272    -240   
-176   -16    
-144   -80    
208    48     
-16    -64    
320    -352   
-272   -192   
-48    -32    
-176   -64    
-480   -352   
224    -208   
0      96     
-272   -320   
80     128    
48     -848   
256    304    
-352   -80    
64     64     
-80    -32    
0      160    
-208   -176   
-240   -80    
320    2400   
2016   48     
-1888  416    
480    -208   
-256   -272   
624    -176   
-16    -16    
0      -1376  
-96    -48    
32     352    
256    -112   
-384   0      
144    -80    
-128   0      
448    -144   
-512   272    
144    -96    
48     -48    
-96    -160   
48     16     
-272   -1488  
320    144    
272    -48    
-848   160    
784    256    
-80    -64    
-448   -16    
80     -320   
64     272    
336    144    
64     112    
-352   -256   
-192   32     
480    128    
-176   320    
-608   80     
320    192    
-528   16     
128    -48    
-448   16     
-576   -48    
-16    144    
64     -112   
-48    112    
192    48     
-496   48     
400    -240   
32     112    
-576   -240   
-176   144    
672    -864   
-2160  -144   
1088   16     
304    -32    
-816   -176   
368    224    
80     112    
-272   0      
160    -64    
0      16     
-192   32     
-128   -16    
144    16     
208    -128   
-592   48     
288    -112   
-192   32     
-48    256    
-144   -16    
-176   96     
-32    240    
496    -432   
-1648  -176   
816    -320   
608    -368   
-336   352    
-128   48     
416    -160   
144    -32    
-176   128    
-48    -256   
-288   64     
64     32     
128    0      
80     192    
-48    -96    
-144   -64    
-688   192    
288    -64    
-144   0      
-192   240    
-80    384    
1056   -512   
-640   -48    
-16    448    
576    -272   
-112   208    
-64    160    
-64    80     
16     80     
-16    48     
112    176    
-80    64     
-128   -80    
-80    -416   
240    208    
368    -240   
-432   0      
672    224    
-576   240    
-96    32     
64     112    
0      -32    
-64    -32    
-112   96     
320    -272   
-176   112    
80     -96    
464    336    
-960   -960   
1488   -1424  
-96    -96    
-1264  384    
256    320    
928    208    
-432   192    
192    240    
144    640    
192    224    
-496   32     
240    192    
-16    384    
-176   96     
32     64     
32     160    
-576   320    
48     -352   
464    -176   
-336   256    
-112   -352   
-48    -432   
256    -256   
-96    -400   
-160   -848   
160    208    
48     464    
48     560    
0      656    
-208   192    
144    -480   
112    -160   
-192   560    
160    544    
-160   16     
48     96     
80     528    
208    464    
-368   176    
0      -144   
224    -128   
-96    -144   
112    176    
-160   272    
96     256    
272    -1136  
-192   -1008  
-16    -144   
-528   -816   
144    416    
-368   -480   
32     176    
432    -1008  
-576   112    
-64    -736   
-368   -640   
-192   -272   
160    -496   
16     592    
64     912    
-48    96     
176    -176   
-144   352    
-112   -48    
-144   128    
-64    112    
64     256    
-16    608    
-240   -272   
-272   -32    
192    48     
-32    160    
336    80     
-416   -48    
160    112    
64     16     
48     160    
304    224    
-400   656    
32     224    
464    -16    
-416   -80    
528    -704   
-176   432    
672    -144   
-240   -48    
-288   304    
416    -96    
-128   64     
416    -32    
-64    32     
-240   176    
80     -16    
240    -112   
-112   112    
-208   64     
64     -112   
-16    -176   
112    0      
-112   128    
16     432    
-96    -448   
0      -112   
-192   368    
-48    496    
128    96     
256    -576   
368    -80    
-560   560    
16     368    
464    80     
-112   304    
-400   192    
112    48     
-208   -128   
192    -416   
256    176    
288    144    
-608   -336   
-32    -208   
48     1008   
384    -704   
-176   -688   
-528   224    
144    448    
528    400    
-48    400    
-496   -336   
96     -112   
16     144    
-272   -128   
576    192    
1552   144    
-1184  -32    
-912   352    
1984   32     
-1632  -1104  
304    0      
1200   848    
-656   400    
-144   96     
272    96     
64     16     
64     368    
-192   240    
144    480    
32     -32    
96     -144   
-272   -320   
80     64     
208    128    
384    -832   
-1952  880    
1872   288    
-768   192    
-48    96     
768    608    
-848   144    
-64    32     
-64    176    
144    16     
0      96     
-96    96     
96     272    
-608   -176   
-432   80     
448    0      
192    432    
-624   -624   
0      32     
304    16     
0      -128   
352    576    
304    112    
-32    -352   
304    736    
-144   528    
16     240    
96     224    
768    -192   
-592   -32    
-240   -368   
352    176    
-16    -224   
32     -32    
-16    176    
160    64     
144    -160   
-224   48     
368    -800   
-288   48     
80     160    
-64    144    
-48    -32    
192    -304   
528    512    
-1344  32     
288    176    
368    -272   
496    1888   
192    3488   
-848   1040   
1120   848    
928    272    
-768   0      
-192   368    
352    112    
192    160    
128    -48    
80     -32    
112    80     
80     80     
400    -48    
-144   -192   
112    -16    
240    -304   
80     128    
-320   64     
96     -80    
336    752    
672    48     
-1008  272    
800    -16    
-512   0      
80     -16    
-480   32     
688    -944   
-688   -96    
112    -16    
304    -112   
-480   16     
272    16     
-16    112    
-224   -144   
128    272    
656    112    
-448   32     
0      16     
240    -96    
224    -352   
-128   112    
256    -32    
-176   64     
224    -288   
-368   -112   
-336   -176   
432    240    
-96    176    
128    256    
0      96     
-96    224    
96     -432   
672    -576   
-160   112    
-96    32     
96     512    
96     48     
-32    -160   
-448   80     
288    -128   
-352   -32    
400    96     
112    -96    
-464   -640   
-16    208    
288    -592   
192    -1568  
-240   -496   
80     -1360  
-160   -80    
240    96     
288    -48    
-384   256    
16     -256   
160    64     
80     -224   
-32    -656   
224    -144   
-48    -896   
64     288    
-16    -48    
-1184  272    
2736   -1312  
-1232  -432   
-224   -560   
688    48     
-16    -16    
64     -816   
-928   496    
608    -720   
96     80     
176    -224   
-208   -32    
-144   -48    
32     -576   
512    -352   
-80    448    
-240   16     
160    -544   
32     -288   
64     -160   
64     -912   
-768   -112   
960    -80    
-464   192    
112    48     
48     16     
-160   -80    
-144   -80    
384    64     
176    240    
0      0      
-1232  112    
176    -320   
64     -256   
-16    0      
0      -160   
16     -304   
-288   32     
448    -752   
-304   32     
128    -32    
-64    144    
32     64     
224    112    
-112   144    
-224   96     
320    0      
96     -192   
-496   -496   
1536   1824   
-304   -208   
-2400  -240   
1984   176    
-80    -192   
-1504  432    
1392   -16    
208    688    
-384   176    
-128   -16    
176    -160   
128    -48    
224    -32    
-304   64     
-160   48     
304    288    
-192   0      
-256   -224   
32     32     
368    -176   
-176   32     
464    880    
-1632  -304   
160    368    
1248   -368   
-1264  -224   
352    656    
-752   288    
-80    -48    
-144   -128   
-384   -160   
-320   -96    
-160   -288   
-128   -96    
304    -816   
256    96     
-304   -1168  
208    208    
-336   240    
-16    -208   
-176   224    
304    32     
-560   -608   
640    -208   
-896   192    
640    -240   
80     1120   
-1440  672    
384    -272   
272    -400   
-304   192    
192    -560   
-240   -176   
0      -32    
64     240    
448    384    
-192   -368   
-224   592    
560    -160   
-208   -384   
-160   -112   
-288   288    
208    -144   
256    16     
-336   -224   
-464   -368   
0      -112   
608    64     
-608   -192   
-160   -224   
48     -32    
-880   624    
256    128    
128    -256   
-544   1312   
992    1248   
-176   448    
-1600  -1392  
-208   -768   
320    -224   
16     -400   
-320   432    
-528   272    
48     160    
192    96     
-160   -80    
-144   464    
80     208    
272    192    
-160   432    
-624   192    
192    32     
-32    -192   
-256   -32    
112    352    
112    240    
-464   -384   
-384   -864   
112    1024   
-304   304    
-144   -1024  
-400   -64    
112    384    
176    32     
-336   -224   
-16    -128   
432    1120   
-208   112    
-128   -256   
96     816    
-112   384    
-176   -336   
192    -400   
-320   32     
-176   -192   
-128   -64    
160    336    
64     240    
-1328  -960   
-128   -144   
224    -272   
-144   -416   
480    -448   
-928   -272   
32     -1424  
-160   -1200  
-128   -528   
-32    -464   
-128   384    
240    400    
-304   256    
-16    48     
112    224    
-416   -80    
-32    -64    
32     32     
160    224    
-464   736    
32     352    
-368   -800   
208    16     
272    96     
-80    96     
-288   -112   
96     -384   
384    240    
-112   144    
16     528    
-528   880    
16     352    
-960   -224   
-496   224    
16     -560   
496    -144   
-272   320    
256    112    
208    256    
-240   544    
-208   768    
112    288    
-80    528    
48     48     
16     272    
-176   336    
160    192    
-624   0      
48     208    
-224   480    
-144   256    
112    144    
112    -32    
432    384    
-1152  736    
480    -240   
288    656    
-480   -416   
208    -432   
368    -288   
-272   -176   
144    400    
-176   192    
-288   32     
-176   176    
304    -160   
-112   -64    
-32    304    
64     32     
-144   208    
240    272    
-64    -128   
-272   -32    
-80    496    
160    176    
-144   176    
96     288    
-208   0      
-96    352    
144    -128   
-272   128    
128    224    
352    -64    
-528   -320   
-2064  336    
1264   -16    
640    -240   
-400   -304   
-336   336    
448    -128   
48     -576   
-224   -352   
48     -128   
192    288    
-592   80     
160    -80    
400    208    
80     48     
-256   160    
64     0      
48     80     
-112   32     
-16    160    
-144   48     
528    672    
800    -256   
-896   320    
480    32     
-432   -16    
240    96     
160    96     
-208   16     
320    -176   
-112   224    
64     0      
112    160    
-240   0      
304    368    
-784   -160   
176    32     
224    80     
-528   368    
-48    288    
-80    160    
288    288    
-176   -240   
-288   336    
-48    48     
-144   -192   
-64    -96    
176    -240   
-80    368    
-240   304    
-400   -144   
528    96     
144    -336   
-320   48     
0      112    
160    304    
-16    800    
336    240    
-320   -128   
-624   32     
112    -32    
256    -208   
80     -80    
-368   160    
-304   -16    
576    352    
704    48     
-560   16     
-208   176    
-576   -1008  
64     3088   
848    -544   
-1360  -608   
704    -96    
160    -304   
-256   128    
112    16     
208    176    
-48    16     
-176   320    
32     -128   
240    368    
288    -112   
-80    -848   
128    48     
-128   208    
272    -16    
160    128    
384    352    
-1120  160    
720    496    
288    -112   
-544   -80    
256    192    
240    256    
-752   -336   
288    288    
64     -144   
-128   -800   
-80    -192   
-176   144    
448    -144   
-288   80     
368    0      
-112   0      
-96    192    
-176   -112   
144    48     
336    32     
32     48     
-144   -32    
-112   128    
256    208    
96     128    
96     128    
64     0      
-128   32     
240    464    
-208   224    
240    208    
48     80     
16     848    
-336   32     
-272   16     
128    -112   
-80    -256   
-144   -16    
352    192    
496    -752   
-144   144    
208    -864   
-256   192    
64     80     
272    -128   
-176   48     
64     160    
-256   32     
416    -96    
-144   640    
336    208    
-64    -224   
-240   80     
304    512    
160    -240   
-112   -64    
96     -224   
-240   256    
80     -288   
208    -176   
-80    352    
-368   -544   
960    -2256  
-544   544    
1248   -576   
-1248  880    
352    80     
112    -320   
784    -400   
-224   368    
-288   400    
-32    -32    
432    -48    
-32    -1472  
0      96     
-16    800    
128    240    
-144   -48    
224    64     
0      -304   
16     496    
112    112    
-352   -736   
1088   -336   
-688   -288   
-224   496    
384    -336   
-48    112    
400    0      
-272   -64    
-128   -128   
144    432    
752    800    
-592   640    
-192   -192   
208    -96    
304    -96    
288    -704   
-432   64     
16     -48    
528    288    
-32    -192   
-32    48     
32     0      
96     176    
96     192    
80     208    
-272   64     
16     192    
144    48     
128    -416   
544    1472   
-160   1488   
-368   592    
608    -704   
-832   -272   
400    0      
224    64     
96     80     
-224   64     
160    -192   
352    -144   
-208   -272   
-96    144    
496    736    
-400   80     
48     -1024  
272    -160   
-224   -288   
-144   -480   
-16    -208   
-32    -304   
304    -656   
-1584  528    
2080   -848   
-1392  240    
-336   -224   
880    -480   
368    -1248  
-752   -960   
112    -512   
624    -944   
-112   96     
-144   -848   
0      -48    
64     -272   
48     -336   
-176   96     
48     -352   
-656   32     
512    160    
-80    -320   
-224   -80    
16     -256   
32     -160   
-368   -416   
-320   -912   
832    -1104  
-400   112    
-112   416    
208    -176   
-96    -160   
64     80     
48     -592   
-64    -624   
736    -496   
-240   48     
-336   208    
-80    -960   
-512   -768   
336    -528   
160    -128   
0      144    
144    -624   
-48    -432   
-112   -1344  
192    64     
560    352    
208    16     
160    -80    
-208   64     
-320   -80    
800    1968   
1104   -64    
-1888  -208   
-304   -160   
1216   -1136  
-240   -1104  
-64    -1056  
-576   1104   
288    -704   
352    192    
80     48     
-352   240    
96     -176   
112    -272   
272    -32    
-112   -80    
-256   208    
304    496    
-176   432    
0      -304   
-32    -336   
112    192    
-848   -16    
624    160    
80     48     
32     -656   
-208   288    
-96    -352   
32     -640   
528    464    
-320   16     
-288   288    
240    -96    
48     -416   
-224   208    
32     960    
160    912    
144    784    
368    1344   
-160   48     
80     -992   
272    64     
16     480    
-96    80     
-160   -176   
384    -112   
352    976    
-640   -416   
-320   -656   
736    48     
128    896    
-512   -544   
-1952  -1088  
624    -1232  
144    -1072  
-432   -32    
-32    -496   
-96    -16    
320    272    
112    -1296  
48     -464   
-368   336    
-64    128    
208    -224   
-80    -144   
-160   400    
304    320    
144    224    
-432   -544   
208    -320   
-32    -128   
-32    240    
288    -1264  
-256   -128   
-160   -496   
240    -336   
-496   -176   
848    -192   
208    320    
0      -64    
-672   -1984  
160    -112   
-16    -144   
-112   -816   
128    288    
-304   -992   
-208   -16    
-160   400    
320    -176   
-32    -320   
-304   320    
-80    -64    
224    -128   
144    384    
0      144    
-16    256    
32     64     
112    -160   
-928   -368   
-112   64     
-368   272    
-272   -816   
80     -240   
448    16     
-608   -560   
112    -304   
48     -32    
224    -992   
-272   64     
208    -32    
-96    144    
-144   -192   
240    -64    
-128   -80    
-144   -96    
256    48     
64     304    
-48    16     
-176   48     
176    -64    
-288   -48    
32     192    
320    64     
-352   192    
496    -80    
-384   64     
144    -160   
48     176    
112    0      
80     -144   
160    -880   
-1280  288    
848    -48    
528    304    
-704   -544   
-512   -48    
640    -304   
16     16     
-336   -272   
-1264  16     
-80    32     
0      160    
16     -224   
-256   16     
320    -32    
-272   64     
192    64     
432    80     
-400   64     
32     80     
528    1072   
-592   -928   
-832   144    
800    -144   
-880   112    
0      32     
288    96     
80     272    
-432   96     
176    -240   
96     112    
48     80     
-16    144    
-112   112    
32     -16    
-144   32     
-32    -80    
-224   -512   
384    -96    
80     304    
-48    32     
-1120  -112   
176    -80    
-896   -352   
512    -272   
32     -48    
0      128    
544    112    
-192   -192   
-176   -96    
512    -48    
-320   -32    
-128   176    
-176   448    
-32    -224   
-80    192    
0      -96    
-48    736    
-384   256    
-160   32     
320    0      
-304   64     
-64    16     
0      32     
192    -144   
-560   48     
96     -32    
-656   16     
-96    -720   
2064   -3424  
-3520  -1312  
1568   992    
-688   -80    
-512   416    
1168   -128   
-752   128    
32     160    
-64    208    
-320   0      
416    144    
-16    16     
-560   48     
32     48     
320    112    
-112   48     
-192   112    
-208   -64    
-144   -432   
688    -624   
-320   -208   
112    16     
-160   256    
-560   -48    
256    144    
-48    128    
-176   48     
128    128    
288    48     
-224   176    
-256   -32    
304    224    
-128   -32    
224    256    
-368   240    
320    320    
32     96     
288    -224   
-128   -208   
-16    -96    
272    144    
-16    144    
-160   208    
192    16     
-256   64     
112    -96    
32     80     
192    160    
-480   -16    
400    -112   
160    -128   
64     224    
-1072  432    
624    144    
-448   416    
272    224    
-80    -336   
-176   -928   
-368   -560   
224    144    
0      -96    
-176   32     
112    32     
208    32     
-128   -80    
-32    48     
-80    -64    
176    0      
-48    16     
64     -96    
32     144    
64     -160   
-224   -112   
16     -320   
-144   128    
16     384    
-128   112    
-32    -144   
160    -32    
-144   -48    
-208   256    
1312   2608   
656    544    
-1376  -592   
416    -144   
-32    336    
320    304    
-272   176    
16     976    
112    304    
-240   160    
320    -160   
48     128    
-160   288    
-48    272    
224    160    
-192   80     
0      -208   
160    0      
-64    -208   
-144   272    
-192   1232   
592    64     
-432   64     
240    -784   
80     688    
240    -1920  
48     -80    
-128   96     
-96    96     
240    -176   
304    544    
-160   240    
16     512    
80     -464   
336    -288   
-160   32     
-128   704    
0      -448   
-16    32     
128    400    
240    -320   
-80    288    
-96    112    
-96    368    
32     -272   
112    -96    
16     32     
0      144    
-272   928    
1056   2016   
-256   -480   
-2112  -464   
2448   784    
-656   704    
-832   352    
192    704    
368    -416   
240    256    
-400   -336   
112    400    
96     -128   
96     48     
64     176    
-224   96     
0      32     
96     96     
-16    512    
240    48     
-176   -192   
144    16     
-672   -896   
1824   -144   
-224   -1968  
-1360  -240   
416    -592   
240    -784   
-496   -1456  
64     1408   
592    2672   
-480   912    
624    -592   
48     -208   
-288   320    
112    320    
496    384    
-48    -80    
0      640    
-256   -320   
-64    112    
464    -800   
-288   64     
-80    -384   
48     160    
-336   -1056  
-608   -64    
560    608    
-432   -496   
0      -400   
624    -240   
-304   -128   
176    -288   
-576   -368   
224    -528   
528    736    
-304   -1648  
352    64     
-480   -64    
688    1136   
-304   544    
-352   -240   
352    160    
224    -368   
256    96     
-96    -800   
544    80     
0      288    
16     368    
64     288    
-48    176    
-496   -864   
1200   576    
1632   672    
-1312  784    
-176   512    
480    16     
192    -848   
96     -1856  
-64    720    
-256   -160   
-16    448    
352    -512   
-64    -304   
32     -384   
96     816    
48     112    
-128   -32    
0      64     
-48    -528   
-48    -576   
192    256    
112    288    
-80    16     
-432   160    
496    48     
-784   -336   
432    -912   
128    -192   
-544   -896   
-112   -896   
336    -704   
208    544    
-160   720    
64     -320   
160    -128   
-144   -2336  
160    -128   
240    -464   
-368   -128   
112    -640   
144    -48    
176    -272   
176    272    
96     176    
304    480    
160    992    
96     64     
352    320    
-160   96     
-48    688    
-112   -144   
432    208    
-32    128    
-464   -1200  
-384   -640   
528    -1632  
352    -112   
32     -240   
128    -288   
-240   -528   
352    -944   
64     -512   
-176   -16    
112    -80    
-320   160    
48     144    
-112   -256   
-64    -432   
-320   -912   
192    -912   
-64    -432   
48     -96    
-16    -768   
16     -16    
32     0      
-96    384    
528    432    
48     592    
-80    1296   
544    720    
-400   80     
-320   2304   
1040   -720   
-1232  464    
-160   -112   
560    -128   
160    256    
112    -432   
-256   208    
416    -240   
-96    32     
368    -128   
-112   416    
0      -288   
224    96     
208    240    
96     64     
-128   416    
240    -144   
-208   -272   
256    -272   
256    352    
-160   -1088  
-1008  480    
1696   112    
-544   -160   
-480   192    
80     176    
240    416    
-128   80     
-208   -304   
144    -176   
0      -224   
-144   -320   
-416   -48    
-16    -160   
-80    144    
-160   -80    
96     0      
-112   -224   
160    -48    
-16    -48    
144    -16    
-448   112    
160    -16    
112    -96    
176    48     
-400   -224   
0      48     
224    -128   
-448   -256   
656    -1088  
-1472  608    
1504   368    
-416   -592   
0      96     
-64    -720   
128    240    
384    -352   
32     -96    
-192   -48    
-256   176    
-48    0      
96     -16    
-16    192    
448    -112   
-560   64     
528    -320   
-272   48     
288    -304   
-240   48     
-32    -1056  
944    672    
400    -176   
-1056  624    
1792   -128   
-1152  32     
32     -112   
208    -224   
-352   -416   
304    -80    
-112   96     
16     -112   
128    112    
-32    -160   
160    80     
-192   96     
240    32     
-352   544    
176    0      
-240   192    
336    48     
-416   -240   
112    -144   
-80    80     
-112   16     
288    880    
-656   368    
112    112    
-1040  80     
64     96     
368    112    
-752   -176   
-128   -128   
256    144    
-288   -96    
64     0      
352    -48    
-240   512    
624    -96    
-144   224    
-160   160    
-304   -224   
64     16     
-192   -144   
-192   -80    
-544   48     
160    64     
144    -96    
-144   48     
-1584  -2640  
2560   -2640  
256    688    
-864   368    
-336   368    
0      -192   
-256   112    
352    -144   
128    480    
-560   -192   
-160   192    
800    0      
-432   48     
-128   16     
-176   0      
240    -48    
-240   64     
48     96     
-944   -16    
-288   -384   
272    -208   
-176   384    
-80    128    
416    32     
272    -16    
-560   144    
336    128    
-544   -80    
480    208    
-96    32     
-288   -32    
64     160    
-128   192    
-352   64     
80     448    
336    144    
-336   336    
-16    -32    
-128   80     
160    48     
-16    -16    
-384   112    
224    384    
96     336    
0      -48    
0      -656   
80     -160   
-224   496    
-480   192    
96     16     
-336   -112   
160    112    
208    480    
224    288    
-224   -144   
112    -160   
-208   432    
144    880    
64     368    
96     80     
48     128    
-400   96     
144    96     
192    0      
-144   160    
-544   400    
-304   624    
288    304    
416    960    
80     1056   
-256   -688   
-128   48     
304    272    
96     224    
-160   0      
0      144    
16     384    
288    -64    
-256   544    
48     -496   
-368   256    
528    1376   
-816   -176   
-112   -64    
928    1360   
-416   448    
-688   -112   
-64    320    
672    864    
-368   -48    
-96    0      
-32    368    
16     -192   
-144   -32    
-112   -16    
-512   80     
64     32     
240    -144   
-112   -128   
-48    240    
0      416    
-64    624    
320    -48    
-160   64     
272    64     
-320   -224   
-320   -192   
336    128    
224    416    
16     416    
-96    48     
-160   -48    
208    64     
64     -112   
0      80     
-48    -48    
96     224    
-160   496    
160    -336   
224    16     
-160   -80    
-528   176    
384    112    
176    128    
32     48     
-176   -64    
32     0      
128    80     
304    192    
-160   64     
-224   160    
-464   -1440  
-384   -48    
-16    -496   
-736   -128   
640    112    
400    -128   
32     -144   
-896   -864   
-64    96     
320    656    
176    752    
-352   -176   
16     -112   
224    176    
-144   208    
-160   -96    
160    16     
208    -720   
-352   240    
160    800    
-240   -544   
1424   544    
-2256  176    
1136   -256   
-432   1104   
-320   720    
288    -320   
608    -752   
-576   576    
-32    1232   
224    1040   
-352   896    
400    688    
224    176    
-96    -64    
-336   -64    
112    -176   
384    -496   
-368   -80    
-112   16     
64     128    
-96    32     
48     320    
-16    -336   
-528   -816   
-320   -1552  
-512   -752   
528    576    
-864   496    
-32    256    
16     208    
-368   496    
-80    -160   
608    -672   
-160   -32    
304    304    
-64    -1104  
656    -1872  
-64    -320   
432    528    
-224   16     
-416   224    
384    -64    
-496   512    
336    336    
-576   864    
496    -112   
96     192    
-192   -304   
-128   224    
-768   752    
192    496    
-416   -192   
48     -688   
448    0      
320    1136   
-592   1968   
-432   -176   
1008   48     
288    -176   
-624   16     
-352   -528   
576    128    
288    -1136  
-320   48     
16     80     
-48    112    
368    -336   
304    -1120  
-560   -48    
144    512    
-96    560    
528    80     
192    -144   
-624   96     
576    304    
-352   -272   
240    176    
288    -384   
-272   736    
368    480    
-224   400    
256    -288   
400    176    
-48    112    
-96    160    
176    -48    
48     432    
-160   176    
192    176    
-16    80     
-96    -16    
16     240    
32     -80    
-80    64     
48     -1472  
-512   -240   
176    -224   
144    -64    
-32    -64    
-176   -48    
464    -240   
512    416    
-368   224    
192    288    
-224   -16    
176    -240   
352    0      
-288   -256   
-16    96     
128    -144   
16     -144   
-368   -576   
80     -80    
208    -160   
32     -64    
-128   0      
160    256    
-128   -96    
352    -352   
-400   416    
112    -304   
-112   96     
272    -384   
32     368    
-48    -1744  
-240   96     
368    -192   
144    0      
-480   208    
-400   -2592  
-256   800    
1568   80     
-1200  176    
688    48     
384    352    
-672   176    
-160   -64    
192    0      
208    96     
-112   -240   
0      -48    
-32    -16    
192    352    
48     -64    
-192   -256   
400    0      
-208   288    
48     16     
80     -368   
544    1408   
-1088  -368   
-448   320    
1152   -528   
16     -192   
-352   -112   
-144   -176   
496    -784   
96     336    
208    -160   
-352   208    
-32    -144   
320    144    
-64    -80    
-144   -64    
112    112    
208    16     
160    32     
-64    0      
272    80     
-224   0      
-16    112    
-48    -64    
400    32     
-272   -144   
-272   -1520  
480    -64    
-608   80     
288    -288   
240    656    
176    16     
128    896    
432    -1552  
144    -512   
592    272    
-1040  32     
192    512    
608    112    
-128   -496   
64     64     
-208   -320   
208    48     
192    64     
224    -496   
-576   -160   
512    -224   
144    -64    
-352   -832   
368    0      
-160   48     
160    -368   
1056   -96    
-1680  288    
464    -528   
736    112    
-1056  -64    
240    -160   
592    -32    
-272   16     
-240   -288   
64     192    
112    -48    
-272   48     
400    16     
-144   -1056  
-144   -112   
128    -304   
112    -48    
80     -80    
-352   96     
64     -112   
-208   -768   
-288   -32    
624    -176   
-1040  -144   
80     0      
256    192    
-560   656    
672    -496   
-352   -208   
-144   160    
-128   -64    
-144   64     
48     64     
64     448    
-720   80     
16     -192   
80     -416   
224    -16    
32     -128   
-48    -32    
192    -96    
-240   -80    
160    -96    
416    -144   
-656   144    
-240   -528   
320    96     
64     -656   
1168   1344   
-1600  1648   
240    80     
1648   -320   
-1024  -80    
-544   112    
176    -128   
-256   -48    
160    -208   
-768   -16    
592    -16    
-128   144    
80     -528   
224    96     
-304   0      
-240   -256   
320    192    
80     -176   
-400   -352   
736    -928   
-256   -272   
0      -16    
-64    352    
688    144    
-704   -288   
208    -368   
464    -96    
-288   -656   
336    -176   
-432   -432   
224    -528   
-32    -160   
16     -320   
-176   -160   
208    -448   
-208   -208   
-64    160    
608    -112   
-144   -608   
-640   -256   
208    -400   
48     160    
64     -320   
80     0      
-192   -128   
-192   -96    
-160   -720   
304    208    
192    528    
-304   -128   
0      -912   
256    720    
-672   704    
192    528    
-176   704    
48     256    
544    992    
-368   1760   
-16    1776   
80     -816   
-416   -368   
192    -112   
-48    304    
96     -224   
-48    464    
240    288    
-288   -432   
80     -240   
416    -288   
-400   -208   
-448   -416   
-160   240    
-176   -256   
-272   -48    
-192   32     
32     -80    
-144   304    
-352   128    
160    -224   
192    -32    
-320   16     
592    480    
-768   528    
176    -208   
160    432    
-272   -336   
-272   352    
-288   -352   
64     -144   
176    272    
-32    16     
-64    16     
-32    0      
64     48     
-368   32     
-256   112    
-16    32     
-48    160    
-144   96     
-16    144    
-64    -80    
-608   592    
992    -432   
-928   -64    
128    -48    
112    160    
64     144    
-176   496    
-32    112    
-544   -48    
-32    0      
80     32     
-48    112    
-48    -160   
224    80     
-384   -80    
224    304    
112    272    
-192   432    
16     32     
-96    48     
-272   320    
96     144    
-128   192    
-400   80     
16     224    
-304   -128   
-192   -64    
-400   -304   
592    -272   
-464   -1248  
1952   -880   
-16    880    
-1152  -16    
496    0      
-112   -144   
-32    -368   
80     720    
208    736    
-128   -784   
128    512    
64     32     
16     272    
-160   -320   
192    512    
-64    -176   
-80    64     
-192   -480   
384    432    
192    816    
-112   160    
-656   -912   
832    -640   
80     -64    
-1104  256    
848    160    
-592   -368   
-192   -1248  
-1664  -784   
608    -720   
-320   -1152  
288    -336   
-32    160    
-368   96     
-16    -128   
-16    240    
32     112    
-128   -688   
-592   48     
80     16     
464    -448   
-96    -192   
80     32     
-144   368    
-32    -368   
-64    -304   
16     752    
720    112    
-288   320    
352    -256   
-96    -96    
128    -96    
256    80     
-32    176    
80     736    
16     16     
-448   208    
400    224    
-816   48     
208    224    
464    -16    
-80    0      
-16    112    
-448   -176   
512    -144   
-128   96     
-128   0      
16     144    
-256   -336   
720    -384   
960    3232   
-1568  1888   
1072   -608   
992    -224   
-736   32     
-352   112    
-224   336    
1120   -576   
-224   352    
160    -368   
-384   368    
560    -16    
-160   112    
-96    32     
16     144    
-384   272    
192    160    
-80    16     
-192   32     
432    -320   
-192   1168   
336    560    
-80    48     
-784   96     
544    144    
48     144    
0      128    
-304   -16    
304    48     
32     48     
80     -32    
-192   224    
96     288    
288    400    
-352   128    
288    48     
-32    208    
464    16     
-224   64     
-160   96     
176    80     
80     80     
64     112    
32     -80    
-400   -48    
416    -80    
-768   -192   
496    -64    
-64    48     
32     96     
-80    224    
-48    -416   
512    -496   
-96    400    
96     -144   
-512   112    
128    -192   
-336   16     
304    48     
48     80     
112    64     
-224   64     
144    32     
0      -16    
-32    0      
96     64     
192    384    
-64    400    
-128   304    
368    480    
192    0      
-400   0      
320    208    
0      80     
-96    16     
224    -144   
-192   256    
128    336    
224    -320   
-96    112    
0      208    
-752   1056   
3088   -1184  
-1088  64     
-496   -80    
736    192    
176    0      
-656   176    
208    288    
-80    -144   
128    352    
128    176    
-240   -112   
64     -64    
-32    -208   
176    160    
256    544    
-320   -16    
240    48     
-96    448    
0      -32    
384    -448   
-1536  576    
912    0      
80     0      
-560   -496   
112    400    
160    -800   
-240   -176   
96     288    
176    64     
-224   64     
-144   -80    
32     -48    
192    80     
-176   192    
416    416    
-432   272    
336    256    
-336   96     
-16    -176   
48     208    
128    -304   
-304   128    
160    -352   
-320   -64    
272    -32    
96     96     
32     32     
-128   112    
48     -496   
656    -512   
-352   688    
576    192    
-64    64     
240    -288   
-512   208    
208    -704   
-64    -176   
144    -3072  
96     208    
-64    176    
64     96     
32     64     
-272   208    
752    192    
-336   128    
0      96     
352    16     
-352   -144   
64     -48    
-112   -176   
672    304    
608    96     
-816   -1168  
848    208    
-368   -528   
-144   112    
400    0      
592    176    
-432   32     
-128   128    
256    96     
32     16     
16     0      
320    112    
-144   112    
32     64     
192    368    
-112   -144   
-16    0      
48     -368   
288    704    
-800   -256   
-96    416    
912    -112   
-608   0      
400    -48    
80     -144   
-368   304    
736    -304   
-80    224    
-384   -224   
-16    96     
336    80     
224    416    
16     -624   
-128   400    
256    -192   
16     160    
240    -48    
-528   192    
-160   -288   
304    -464   
384    176    
-432   -16    
-192   240    
464    -304   
240    176    
-128   64     
-448   -928   
256    864    
1520   -480   
-2192  208    
144    96     
912    -48    
48     -2624  
-912   32     
528    256    
-288   192    
-32    -16    
464    16     
32     -192   
-304   -64    
80     -224   
304    176    
-128   80     
-80    -544   
96     64     
352    -48    
-720   192    
208    -384   
16     -896   
-16    -16    
-320   160    
960    48     
-224   -320   
-240   48     
336    48     
-16    -176   
192    -752   
-336   64     
256    -256   
-240   -256   
256    -784   
80     -352   
-400   208    
240    -32    
320    240    
-192   -96    
224    -96    
0      384    
-224   176    
-96    -352   
-32    736    
576    -400   
-224   -448   
-208   -432   
80     -464   
-48    176    
176    -336   
-608   80     
-304   288    
1344   -944   
-624   -592   
224    912    
272    80     
176    -752   
272    -32    
-352   -224   
176    -64    
176    -96    
-160   -96    
176    144    
48     800    
-64    -16    
80     -224   
-256   -16    
-128   64     
448    -304   
-192   -272   
-48    -144   
128    -176   
192    -1696  
192    -96    
96     16     
112    64     
-144   -144   
-112   -112   
-96    144    
-48    48     
-496   -544   
1088   -1024  
-256   464    
400    -448   
-848   112    
96     0      
-48    -176   
-224   16     
-304   400    
64     -1264  
176    -128   
96     -80    
80     240    
-32    256    
-80    16     
80     -80    
336    -80    
-192   384    
-144   0      
-1136  -96    
-48    80     
496    -112   
-64    -16    
528    -128   
-336   -800   
-112   224    
416    336    
112    416    
-384   -16    
224    -256   
-64    32     
144    48     
-576   192    
16     -80    
32     -80    
96     256    
-64    624    
432    288    
-128   880    
-144   -544   
336    32     
-208   352    
-176   0      
-208   384    
512    -272   
0      -16    
-128   -128   
208    64     
-336   96     
-48    -288   
-1344  -928   
1072   304    
144    -720   
-1168  144    
1024   864    
848    64     
-320   496    
-480   -320   
224    -448   
128    -432   
-192   640    
32     464    
-176   304    
-128   -208   
192    -48    
272    -192   
-624   -416   
-240   -96    
496    32     
112    64     
0      800    
208    -880   
-3408  -96    
1872   -896   
-2112  2032   
592    560    
-272   352    
-624   48     
1040   -240   
-432   -160   
-144   -112   
80     160    
-64    -288   
464    -176   
-576   -272   
-256   128    
272    -144   
-160   48     
-160   96     
-192   -176   
-128   -128   
160    96     
-304   -752   
-480   320    
800    -224   
-768   -272   
368    512    
288    -240   
48     32     
32     144    
-576   -112   
352    -80    
-48    192    
96     32     
-256   -48    
-688   -560   
-992   -224   
-416   512    
576    -400   
448    288    
-192   -96    
-240   112    
64     -128   
-240   96     
160    144    
-384   96     
-224   80     
192    32     
-144   -336   
-144   -1984  
832    -1744  
144    64     
-896   80     
-944   80     
-208   -48    
496    -176   
128    80     
-208   -64    
-416   -240   
192    224    
144    16     
-400   -64    
416    240    
-320   -64    
128    272    
80     112    
-208   144    
64     -16    
-640   496    
656    336    
-704   560    
288    -352   
544    224    
304    -112   
-864   208    
560    432    
-400   112    
160    -80    
-48    96     
-64    80     
32     160    
-240   -144   
-176   48     
48     -144   
-592   352    
544    -144   
-688   -96    
608    240    
-656   -80    
-48    176    
432    -16    
-512   112    
224    208    
-384   0      
400    304    
-176   0      
-304   160    
240    48     
-304   -96    
-224   16     
-592   -48    
-32    816    
960    64     
-832   -112   
-96    -48    
864    304    
-192   112    
-320   192    
16     128    
-240   224    
128    240    
-16    80     
-48    288    
0      -64    
-32    -80    
16     304    
-272   944    
336    576    
96     -400   
-384   192    
256    48     
-64    256    
-368   -16    
160    80     
144    48     
-144   -80    
-144   -208   
336    240
[truncated: 296,011 more chars]
