# Supplementary material for: A Fault Diagnosis Method for One‐Dimensional Vibration Signal Based on Multiresolution tlsDMD and Approximate Entropy
Source: Hindawi journal article supplement (doi:10.1155/2019/3262818), 2019-01-01
Supplement: f1 [file 3262818.f1.zip › 3262818.f1/gear signals/pitch errors signal/Data14.txt]

-144   -544   
432    -928   
256    656    
-96    1088   
-128   544    
-192   -400   
272    -496   
112    400    
80     -512   
-544   160    
192    128    
-16    368    
48     -64    
48     -128   
-96    -192   
-144   -240   
656    -48    
-208   -640   
-128   -720   
-144   688    
32     -752   
240    32     
-16    -96    
-48    48     
-384   -672   
144    -528   
240    0      
144    16     
-288   -432   
80     -48    
208    -144   
32     416    
-240   496    
-112   144    
112    96     
-64    -96    
144    80     
-16    96     
-112   144    
48     304    
-176   128    
-192   160    
320    -80    
-96    144    
-80    -192   
96     -1536  
-1360  -464   
816    -48    
-464   96     
96     64     
832    208    
-720   64     
256    -112   
80     -288   
-240   -112   
192    64     
32     128    
-336   -224   
-224   128    
688    -288   
-944   -16    
16     112    
-464   112    
-48    208    
48     -144   
-80    96     
544    1088   
-672   -800   
-1280  224    
1472   -96    
-1440  -256   
208    144    
80     -288   
-160   448    
944    -240   
-432   272    
80     -64    
-528   144    
240    -16    
-1040  -48    
-192   -16    
256    -64    
304    368    
-208   464    
-176   256    
96     -272   
192    128    
0      -528   
-816   592    
720    -160   
-176   -96    
-192   432    
-144   -160   
-304   432    
-864   240    
336    112    
336    -192   
-528   -160   
112    -224   
128    -160   
-144   0      
-336   -144   
-160   -368   
576    -192   
-16    -48    
-608   96     
288    48     
352    -80    
-128   352    
-320   -160   
-384   368    
864    32     
144    -224   
-432   -64    
1088   496    
-1616  -2848  
-1856  -512   
1408   -176   
-272   384    
288    -304   
-720   192    
64     256    
32     288    
176    144    
176    -64    
-144   96     
-336   -64    
80     48     
80     16     
16     176    
-288   -96    
-80    240    
192    -96    
-256   -240   
944    -736   
-816   64     
720    80     
-624   64     
288    48     
64     -16    
-624   -80    
976    -304   
-480   -96    
-288   -112   
112    192    
128    -112   
0      208    
48     144    
-192   128    
656    64     
-576   -256   
224    0      
288    -144   
-192   64     
144    144    
-80    96     
288    32     
-96    -64    
0      -192   
176    608    
-512   48     
336    112    
64     -112   
-448   16     
224    -160   
-384   -96    
384    160    
-992   240    
576    -336   
-176   -176   
-400   48     
208    16     
-176   -80    
208    -240   
112    112    
-592   -160   
-32    0      
-80    64     
32     -160   
-128   -96    
16     -32    
-16    0      
16     384    
112    640    
-256   448    
176    176    
-32    -208   
144    -112   
-48    272    
-16    0      
-192   176    
288    400    
-176   944    
352    288    
-112   -80    
-544   -1408  
1392   -384   
-992   464    
384    528    
-576   -16    
-240   0      
400    416    
352    384    
-272   0      
-480   336    
256    48     
288    144    
64     -48    
-224   112    
16     256    
64     -96    
-32    -176   
128    96     
-96    288    
-64    0      
208    176    
-96    1504   
112    352    
-272   -560   
0      -304   
176    -192   
-80    192    
-64    -16    
16     -432   
32     0      
96     -32    
64     320    
0      304    
-144   208    
208    -80    
128    144    
-192   272    
64     -320   
80     -368   
-144   -576   
-112   -16    
128    368    
128    -48    
-192   -160   
48     16     
-48    224    
192    176    
-224   304    
112    -64    
-160   -144   
672    880    
352    -160   
-2288  -288   
1360   208    
544    32     
-560   0      
848    368    
-496   -1104  
16     -288   
176    192    
-16    272    
-48    80     
-256   112    
416    480    
-240   288    
-272   400    
544    96     
64     144    
-288   -272   
272    -656   
-32    -576   
-480   -816   
-176   336    
1776   -16    
-1344  -352   
-48    -176   
608    -1280  
-448   -1248  
-48    -576   
16     -272   
160    -272   
-224   64     
128    -768   
64     176    
-64    -304   
112    -320   
192    176    
-304   -320   
128    -640   
128    -624   
-64    16     
-16    464    
-48    176    
304    1456   
-272   1664   
-16    1712   
-272   688    
512    816    
-480   816    
208    -320   
544    -880   
-416   272    
256    432    
320    736    
-656   -640   
-80    -160   
160    64     
352    672    
640    576    
-432   -32    
528    -160   
-480   32     
-16    -112   
16     176    
368    -400   
208    128    
400    304    
-384   80     
256    -64    
528    352    
80     144    
-992   1632   
1136   448    
-944   -384   
-1056  -848   
1008   -848   
-48    -464   
96     992    
-848   64     
400    -656   
400    48     
80     352    
32     272    
-496   -208   
192    576    
288    -688   
-16    -368   
-16    -192   
256    80     
-64    496    
-80    -96    
160    96     
272    -16    
-464   -304   
-400   -480   
592    -400   
-48    -496   
192    -256   
-448   -1264  
-64    240    
240    736    
32     64     
32     -80    
320    48     
-304   368    
-32    16     
192    -144   
-16    -656   
-528   -624   
320    368    
240    608    
-96    -240   
128    -128   
-176   -128   
-112   -64    
336    -816   
64     48     
-32    272    
176    928    
-32    352    
-64    -736   
192    752    
-240   64     
-384   -384   
528    -272   
-496   -32    
-272   -816   
608    464    
368    1296   
-288   304    
80     -240   
-64    -576   
-16    -416   
48     64     
-160   16     
128    -240   
128    96     
-64    -320   
-288   272    
336    -128   
224    368    
-48    96     
80     128    
0      -752   
-240   192    
320    -320   
-128   -80    
48     384    
128    272    
112    208    
-16    -320   
-576   -848   
928    -880   
-848   -288   
592    -928   
240    656    
-208   256    
128    -240   
-48    -224   
-160   0      
-96    -96    
336    -352   
-192   -896   
16     32     
224    -144   
192    48     
-16    -1744  
96     432    
-208   656    
-64    -16    
320    32     
592    368    
-1168  80     
768    -288   
-448   -672   
208    -432   
-80    -176   
48     -624   
-128   224    
48     -208   
208    -48    
-80    -208   
-224   -288   
112    -16    
288    -208   
-352   -864   
256    96     
-112   -512   
320    80     
-224   -48    
304    144    
-96    16     
-256   -256   
-512   -32    
-160   -496   
320    -112   
-32    -112   
-416   -16    
544    -32    
-208   0      
-1024  -2624  
2000   -912   
528    -496   
-736   -256   
672    -128   
-16    -16    
-528   16     
32     -240   
304    -64    
-448   -352   
176    80     
208    -144   
-144   -128   
64     -544   
400    -48    
-272   -1744  
48     192    
208    32     
-336   64     
-64    -240   
128    -48    
-144   32     
-560   -144   
1536   -208   
160    240    
-1104  -112   
-448   256    
1264   144    
-1008  32     
-128   176    
480    -240   
-336   128    
176    -704   
-16    80     
304    -80    
-944   48     
416    -64    
288    16     
-656   208    
384    176    
-384   -80    
112    80     
48     368    
-240   -368   
-512   368    
1696   -496   
-512   608    
352    -736   
-224   -16    
-16    80     
528    16     
336    -128   
-96    -144   
-464   128    
256    -208   
224    304    
-48    -528   
-480   -224   
640    1024   
-256   48     
-208   -1104  
352    208    
96     -128   
32     -16    
-176   80     
-224   -416   
736    16     
192    -48    
-208   -144   
-128   128    
112    -752   
-1936  2192   
1472   -432   
-912   -320   
-2080  -608   
912    -128   
1152   448    
-368   -16    
-480   448    
-240   176    
304    128    
592    0      
-304   -80    
-128   96     
-272   32     
528    112    
-320   -96    
32     80     
-160   -224   
480    528    
-208   -64    
-176   640    
624    -592   
-688   -80    
624    80     
-64    48     
-144   272    
208    -48    
-464   -160   
640    -448   
-496   -256   
128    -144   
-144   128    
240    -192   
128    -32    
-144   -288   
96     -112   
-464   -400   
208    -288   
128    64     
-192   128    
-96    64     
-240   208    
80     -96    
-32    -176   
336    -96    
96     48     
-160   64     
-176   -464   
144    64     
-304   -176   
-96    96     
0      -832   
-304   176    
496    1152   
-992   880    
624    -304   
-560   -704   
32     336    
288    272    
48     -64    
-16    -48    
-48    48     
-160   -176   
-16    -48    
-64    -160   
0      16     
256    -64    
-96    -64    
-96    -80    
-96    -16    
-112   336    
160    -640   
-112   224    
-112   512    
-208   112    
256    -912   
-208   -400   
-112   112    
-80    1024   
240    32     
-320   -976   
656    -640   
-1072  160    
16     -1360  
240    288    
-48    416    
528    1312   
-560   848    
80     -400   
-256   512    
64     -240   
160    -80    
-112   160    
-96    -128   
112    256    
-80    96     
-144   272    
32     -176   
96     368    
-96    96     
-208   272    
320    304    
96     -176   
-1104  -1328  
304    -288   
-320   272    
400    -400   
-336   -624   
-176   704    
-208   272    
0      -336   
112    96     
-32    -304   
-64    208    
144    112    
112    -48    
112    144    
-256   304    
-448   -656   
528    96     
-352   176    
-160   368    
16     48     
-64    -16    
-224   128    
304    -128   
-304   512    
48     0      
304    -64    
-288   192    
-160   -416   
2144   -512   
-1984  1344   
-240   -656   
928    -960   
-560   -256   
0      16     
560    288    
-432   -304   
-80    176    
176    -240   
176    368    
-64    -64    
64     160    
-272   -192   
16     224    
80     48     
-48    48     
-448   -336   
-96    336    
176    -112   
-848   288    
1040   -640   
-720   1072   
208    896    
32     224    
-160   -320   
448    -784   
-208   -176   
16     1040   
384    1200   
-128   -192   
-64    -576   
-240   0      
64     -512   
-336   -640   
400    0      
-368   144    
736    -192   
-32    96     
-256   -144   
176    112    
-368   -672   
128    -512   
592    -624   
-240   -912   
-448   -272   
-352   -2176  
-816   -1488  
432    -816   
-432   -128   
-16    272    
528    224    
-96    528    
-288   -1088  
-256   -16    
224    144    
-608   -496   
544    -128   
-288   -656   
-224   -352   
336    16     
-32    368    
0      240    
-80    80     
272    96     
-176   -16    
176    416    
-240   208    
-112   240    
-448   -1184  
1296   -1120  
736    240    
-976   1168   
-96    1024   
176    -96    
736    -400   
-336   -1136  
-960   -1840  
336    176    
400    592    
176    48     
-112   -592   
-624   -304   
272    192    
640    448    
-272   80     
-208   -240   
-160   -400   
480    -272   
192    512    
-224   352    
48     240    
-672   0      
304    -496   
176    112    
32     896    
320    816    
-368   160    
224    704    
112    96     
0      -80    
320    -112   
224    272    
80     -160   
-48    -400   
-48    -96    
192    192    
-368   -96    
-144   -880   
160    -256   
-160   -64    
16     48     
80     144    
208    240    
-32    160    
352    32     
0      448    
160    304    
-256   -288   
112    -64    
768    1024   
-944   192    
-320   -464   
896    -416   
-304   -304   
256    416    
-96    512    
80     704    
160    80     
-144   256    
144    96     
-224   0      
208    272    
208    320    
-48    144    
16     -48    
304    192    
208    752    
272    304    
176    48     
-448   -624   
320    336    
208    256    
-224   -160   
-208   -96    
464    -176   
-64    144    
-64    256    
-64    16     
-112   96     
976    1856   
-80    672    
-624   96     
-240   -192   
176    -80    
336    -848   
-80    -112   
208    240    
-528   -192   
240    96     
368    32     
-224   -224   
-64    144    
-32    224    
272    -384   
-48    -240   
-192   144    
432    384    
-320   112    
-32    64     
192    -2864  
-160   336    
400    -208   
-672   256    
416    16     
-80    -96    
192    -288   
-112   224    
32     -112   
64     256    
240    16     
-96    48     
-240   224    
192    32     
144    112    
-224   -320   
320    64     
112    -192   
144    208    
208    -288   
-256   112    
224    0      
48     80     
112    32     
-544   16     
736    256    
-400   -48    
80     32     
208    -128   
944    1408   
-880   1552   
208    528    
720    -528   
-144   224    
-320   -240   
144    -144   
32     32     
-48    64     
208    32     
96     112    
336    256    
-432   -240   
144    128    
336    -144   
-400   48     
240    -96    
160    208    
-352   -208   
48     80     
112    48     
-80    -480   
1344   672    
-1328  -16    
-240   -448   
2176   -448   
-1840  240    
224    96     
368    128    
-736   -192   
80     192    
112    -64    
-16    32     
0      -256   
208    16     
240    160    
-352   144    
96     -48    
96     -608   
-272   192    
-288   32     
176    48     
-464   -1152  
-272   288    
864    -224   
-1120  224    
736    -416   
416    -528   
64     -672   
-64    368    
320    272    
-352   -976   
128    -32    
-304   -880   
128    -160   
688    304    
352    -176   
-352   -368   
352    -224   
-336   -336   
272    128    
144    -32    
-64    112    
144    -32    
-192   -96    
-96    -304   
176    32     
624    160    
-336   -400   
112    96     
448    5472   
496    976    
-912   -816   
1648   -1952  
-672   0      
-368   -48    
288    0      
528    16     
-64    -48    
-352   128    
816    144    
-384   96     
48     240    
272    -240   
-416   -80    
-720   -176   
80     -144   
144    -48    
-48    -144   
96     1072   
560    896    
-432   496    
192    -1408  
16     -144   
-576   -176   
752    272    
-256   128    
-272   -96    
80     -64    
-32    -624   
-160   -208   
-144   -64    
-336   -96    
-96    0      
224    -224   
240    -64    
-224   432    
624    0      
-272   288    
16     -48    
192    80     
-48    -672   
384    -672   
-336   32     
-112   176    
288    16     
-416   224    
432    112    
-32    -336   
128    240    
240    32     
-432   -400   
480    -768   
-528   688    
464    112    
-16    512    
-16    656    
768    -32    
144    -176   
32     512    
-80    224    
-64    -256   
-208   -304   
96     -224   
-688   128    
32     -160   
0      -496   
208    16     
96     16     
-160   -1680  
-32    -96    
16     416    
80     800    
-128   368    
-64    560    
-16    0      
-128   64     
144    -288   
272    224    
-128   -64    
-64    64     
128    256    
-144   48     
256    -96    
208    -1248  
272    -384   
-192   96     
160    -800   
-176   -880   
-16    0      
-160   240    
128    -112   
-32    -80    
48     -80    
176    -128   
-160   -432   
16     256    
128    192    
96     368    
0      112    
-256   -32    
-64    -256   
-1280  192    
752    -144   
64     -416   
-224   -400   
176    400    
-480   0      
176    -208   
-112   96     
-48    -48    
-192   64     
112    -288   
16     208    
-16    64     
-432   -144   
-144   -144   
-112   -128   
128    -32    
176    -144   
-400   -192   
-48    64     
-320   48     
48     -80    
48     64     
-592   -112   
-16    -16    
-128   -192   
-272   160    
208    -32    
-400   48     
-1184  -1088  
112    720    
704    -528   
-2656  272    
480    832    
864    -192   
-992   1056   
176    -32    
96     -544   
-144   -1088  
-48    304    
-128   128    
-352   -240   
128    112    
144    -112   
-112   -304   
-352   -368   
-32    176    
144    160    
-112   224    
80     96     
960    -432   
-2416  480    
1184   128    
-528   96     
-528   192    
752    112    
128    1376   
144    1360   
-32    -112   
-320   -64    
128    0      
32     224    
-48    160    
-80    144    
-352   -144   
48     -240   
-368   -1040  
32     -512   
-96    -528   
-224   112    
96     -48    
-176   -176   
368    -704   
-464   -96    
560    176    
-176   -448   
1072   -896   
-304   -112   
-224   544    
304    320    
-544   -64    
-240   -208   
64     208    
-224   -1152  
-400   512    
112    -512   
144    -608   
192    16     
-256   -784   
-304   -224   
32     256    
-320   -272   
192    -64    
48     -208   
-16    480    
416    208    
-736   -368   
496    352    
-144   144    
-864   -1840  
-704   80     
224    304    
-720   -256   
1056   -352   
-272   512    
-272   0      
560    320    
-288   448    
-240   -336   
96     128    
-64    -192   
144    48     
-224   80     
-112   112    
-16    128    
80     64     
160    0      
-240   -432   
-128   928    
256    1024   
-208   320    
-64    -528   
592    416    
-64    64     
-624   224    
240    -128   
-16    128    
0      256    
-96    -160   
-224   64     
64     -64    
16     240    
192    -16    
336    160    
0      80     
-784   -496   
384    -352   
80     -16    
-160   208    
-208   -224   
-448   -336   
304    -384   
336    112    
-256   144    
160    432    
-336   176    
0      384    
432    208    
-272   224    
-208   112    
-208   -640   
240    -128   
192    576    
-560   208    
304    128    
320    112    
-448   32     
288    576    
-480   240    
336    64     
-16    128    
-240   -96    
256    16     
-176   80     
48     480    
400    -48    
-256   144    
-272   224    
464    -160   
-64    368    
-48    112    
-192   -448   
-16    -48    
48     240    
-96    160    
-224   -240   
128    0      
128    208    
-144   80     
-288   -48    
320    -1776  
-1360  768    
1232   -416   
-416   80     
-544   96     
16     -48    
784    -64    
-192   -128   
-496   272    
256    80     
32     176    
288    192    
-208   -160   
16     -96    
16     528    
16     -352   
112    224    
224    160    
-256   80     
-16    112    
336    1648   
928    -160   
-1056  -208   
256    192    
176    -32    
48     512    
240    -64    
-144   112    
-112   -64    
-192   256    
560    -144   
192    144    
-352   64     
-272   -16    
240    32     
224    176    
-80    16     
-144   128    
288    144    
32     32     
48     -16    
-48    112    
64     112    
-144   96     
624    224    
-320   -16    
-96    144    
0      80     
160    112    
176    -176   
-2624  -192   
2592   352    
-80    368    
224    384    
128    -224   
-752   176    
528    592    
-640   224    
528    48     
208    16     
-320   -80    
-288   64     
384    -16    
-416   0      
496    160    
-224   -144   
-96    80     
208    -64    
-144   112    
32     96     
496    1200   
-1008  -336   
-176   112    
112    144    
672    -544   
-544   -16    
624    176    
-80    320    
-112   -192   
192    -16    
-128   -960   
-128   112    
112    -1344  
240    -48    
-448   80     
160    96     
-112   -144   
320    -128   
96     -48    
-112   192    
0      -32    
-304   112    
864    48     
-336   16     
-240   16     
576    -176   
-48    192    
0      -64    
-176   -144   
-336   288    
432    48     
-272   192    
240    -144   
320    720    
-704   176    
80     -64    
208    384    
-416   128    
176    -160   
-224   144    
64     16     
112    112    
16     0      
32     0      
-160   -1552  
192    144    
352    -272   
-352   64     
-16    -288   
1600   2048   
-1488  1456   
1184   112    
1344   -112   
-1632  -144   
-720   64     
1168   -656   
64     -128   
-272   -480   
-32    16     
496    64     
-288   -208   
624    208    
-32    -128   
-256   64     
-48    208    
448    32     
-192   144    
336    416    
304    768    
-192   -176   
-16    -624   
256    48     
-368   -416   
-160   320    
544    48     
-208   -112   
80     -1168  
-96    -464   
176    256    
80     992    
96     576    
0      -368   
-48    -80    
112    -976   
-128   176    
336    -96    
-64    16     
-336   -64    
288    288    
32     -320   
-160   -160   
144    -592   
32     -752   
32     -528   
-208   32     
352    -256   
-656   -1088  
144    1104   
352    240    
-224   -416   
416    528    
-512   -336   
-544   -240   
528    0      
-320   -752   
-144   -160   
-32    1200   
704    1200   
-448   -1664  
96     -3040  
336    816    
-208   -288   
80     -672   
224    -32    
96     -720   
-64    -288   
112    352    
16     -208   
-160   352    
160    -160   
-48    -1360  
-96    48     
-16    -1184  
16     80     
128    -912   
-288   224    
80     -16    
-208   80     
144    -176   
112    -1264  
-224   -384   
432    -272   
-336   144    
656    336    
192    -48    
-208   -384   
-224   -176   
624    -688   
96     96     
-16    304    
-288   64     
-736   -112   
96     -80    
240    -16    
-128   -128   
-48    -64    
-64    -480   
368    144    
80     176    
-192   -48    
272    -640   
-1168  96     
800    144    
-304   96     
400    -432   
64     288    
-1312  800    
288    432    
-480   -208   
224    -272   
144    -128   
48     -624   
-192   80     
-32    -1072  
48     176    
208    -256   
-112   -144   
0      -512   
176    80     
304    -16    
80     -128   
-560   224    
-160   -96    
416    -320   
32     -128   
-16    -32    
-176   -208   
-16    -16    
304    -544   
304    128    
-1552  688    
2592   -432   
-224   160    
-1072  704    
464    -192   
-256   -1168  
-512   736    
144    464    
-1408  -1648  
96     -432   
336    96     
-192   -288   
-176   -48    
288    -640   
96     80     
-32    -2144  
-144   240    
32     -480   
96     -576   
-144   192    
832    1328   
-1840  -784   
-576   640    
1200   -1008  
-704   -880   
-800   -80    
384    1216   
-160   960    
-224   320    
192    -1152  
-176   -1856  
-48    112    
-272   320    
544    -16    
-96    -112   
-736   32     
144    -16    
-112   336    
624    128    
-32    -144   
-304   80     
48     -272   
-320   288    
-832   -3168  
-400   -1184  
1184   -16    
-576   208    
-560   544    
1008   -544   
-704   -160   
-112   160    
-80    160    
96     -80    
-112   -192   
-128   48     
-1136  624    
384    -128   
-464   -48    
-64    -208   
160    832    
592    -672   
-416   64     
-160   -224   
240    256    
272    368    
-224   -384   
-480   112    
656    80     
448    624    
-784   1360   
-1424  2000   
288    48     
-736   144    
304    -352   
1024   304    
-480   -160   
-1312  176    
288    -512   
-464   192    
480    -224   
-336   240    
-272   -272   
352    192    
-96    -144   
96     176    
80     -48    
-112   16     
432    64     
-1008  -256   
160    560    
-176   672    
-304   -16    
448    -32    
-80    -16    
-448   0      
144    48     
-112   -64    
-64    -160   
336    144    
-576   -16    
16     336    
192    -48    
-720   -128   
352    -304   
-16    -112   
32     -336   
-256   -192   
96     192    
-32    256    
-48    -80    
-464   -48    
320    64     
-576   128    
144    176    
0      0      
16     48     
16     -208   
-272   240    
176    -80    
-176   -32    
-16    128    
-336   128    
736    -16    
-368   176    
-80    16     
256    -64    
192    -256   
-352   64     
-16    -96    
-400   -80    
480    32     
-304   -128   
96     208    
128    96     
-160   64     
16     400    
-48    416    
0      96     
240    320    
144    -80    
-240   -48    
-80    176    
-240   -96    
-32    128    
-624   -624   
224    480    
-144   192    
48     -208   
48     256    
-32    -16    
1056   944    
-3008  752    
656    16     
928    480    
-160   -224   
-208   48     
-288   -112   
320    512    
-656   608    
144    -304   
-16    208    
-416   0      
128    -160   
208    0      
-384   224    
16     -80    
64     128    
-32    672    
-32    -224   
0      -208   
304    1248   
-1040  448    
176    -144   
480    -96    
-592   -128   
304    576    
-768   352    
144    -288   
448    -48    
-64    96     
-128   144    
-304   208    
240    16     
64     -128   
-176   112    
208    -80    
-80    0      
-272   -288   
288    112    
-352   -64    
-368   224    
-128   128    
256    144    
208    -32    
-80    48     
-512   96     
352    80     
-112   176    
320    32     
-640   224    
320    1328   
1584   -96    
-960   288    
0      -256   
864    256    
-832   -208   
-80    80     
656    704    
224    384    
-416   288    
64     -80    
272    64     
128    16     
80     240    
-688   16     
304    208    
-48    -48    
32     -160   
-240   -80    
96     -32    
160    192    
-528   240    
1936   -448   
-976   656    
-128   -32    
-112   320    
144    96     
304    -144   
-112   224    
-144   64     
16     -64    
240    64     
-176   -16    
-32    128    
-336   144    
720    -16    
-64    144    
-192   144    
-80    -272   
192    -144   
176    48     
-64    160    
416    96     
112    208    
64     -256   
-800   480    
352    32     
32     -16    
256    144    
176    144    
-96    0      
-352   -816   
-384   416    
784    192    
-560   -96    
288    368    
352    160    
-256   -192   
48     64     
144    96     
64     80     
80     112    
-192   16     
96     256    
-144   64     
32     336    
704    32     
-176   144    
-464   -80    
960    752    
-16    -2176  
-1488  -1056  
432    -80    
576    192    
608    192    
-320   48     
-32    128    
-416   -176   
-64    592    
864    176    
-400   176    
-256   -224   
192    256    
256    192    
0      -352   
-304   -48    
-160   192    
-48    128    
64     -160   
64     544    
-112   464    
32     64     
-256   -400   
464    -992   
-256   32     
32     16     
-96    112    
624    768    
288    1024   
-48    288    
-96    48     
48     -32    
48     288    
112    -624   
-288   -224   
-160   -160   
-48    -288   
176    -352   
-80    -384   
96     592    
-272   -32    
96     240    
160    176    
32     320    
-144   -480   
-96    672    
256    1552   
-224   912    
64     -288   
192    0      
-208   48     
-272   -720   
560    -720   
224    -1504  
-1040  -480   
352    -1312  
16     -528   
0      272    
0      1760   
-96    -224   
208    -496   
128    -32    
16     192    
32     0      
16     32     
-32    80     
192    192    
-32    864    
-80    -128   
240    -16    
-16    -112   
160    -16    
32     -32    
-96    112    
-32    -208   
240    -608   
480    48     
-272   16     
-160   224    
224    208    
112    -48    
96     -672   
-480   48     
-224   160    
144    64     
272    -480   
-48    144    
0      -1792  
-416   -144   
224    656    
-112   320    
48     -240   
112    144    
-112   -32    
32     240    
160    176    
32     -128   
-96    352    
-96    -128   
16     16     
80     -704   
-48    1104   
656    -256   
-864   64     
272    -48    
0      336    
224    304    
-112   288    
-208   640    
0      192    
48     64     
96     32     
32     176    
144    -32    
-32    160    
-240   -32    
96     352    
560    -416   
-640   -688   
-144   -336   
400    192    
128    256    
16     272    
-80    -32    
-256   -704   
160    256    
592    -272   
-352   96     
-624   -480   
736    -208   
-112   -496   
1584   -1328  
-1072  -128   
624    480    
688    16     
-416   112    
112    1088   
1024   608    
-240   -80    
-224   -480   
304    32     
64     -208   
112    48     
-96    -224   
-128   16     
128    -176   
48     48     
320    -352   
-304   -112   
192    96     
64     240    
-48    -864   
-928   -592   
1296   -1520  
-688   160    
-48    -272   
112    -80    
96     -288   
-272   32     
-144   -224   
848    -240   
-128   240    
-224   -320   
64     240    
224    272    
336    -336   
-432   176    
128    80     
208    -496   
-128   32     
96     -16    
80     32     
288    528    
-560   -624   
-240   -496   
384    -608   
224    -576   
-320   -272   
480    -1136  
-544   -272   
160    -208   
-272   96     
-192   144    
144    -192   
-832   -224   
-80    -320   
448    -864   
160    16     
96     160    
-256   -208   
128    64     
80     -80    
96     112    
-208   -224   
-32    128    
144    -144   
-416   -16    
-96    64     
192    -80    
-944   -976   
176    -3504  
1120   -3088  
-400   496    
-16    176    
160    160    
-464   -128   
-176   -1776  
880    352    
-448   -512   
96     -48    
-128   32     
352    0      
-80    -288   
112    112    
-240   -384   
448    16     
-1120  -208   
80     32     
-336   -208   
848    -816   
-544   -448   
496    -512   
-96    288    
-848   -96    
128    192    
848    -64    
-224   192    
-672   0      
400    16     
256    -32    
-512   -32    
128    -96    
-96    96     
528    48     
96     224    
-544   64     
112    -192   
496    176    
-144   -400   
304    176    
-320   -32    
320    -304   
176    16     
-144   -48    
80     -16    
32     -96    
224    -96    
-208   -64    
-448   -16    
128    -32    
80     -32    
192    -208   
272    224    
560    -1936  
-80    -352   
-224   -288   
320    -288   
288    128    
64     400    
-992   128    
336    -48    
-224   -144   
-48    16     
-96    64     
-48    -32    
224    64     
80     -288   
-192   320    
480    -336   
-16    -208   
-288   128    
80     48     
0      -80    
-272   48     
80     112    
16     192    
80     -1168  
-288   -240   
-432   608    
96     -576   
48     -208   
-864   -1520  
1056   -560   
-48    -96    
-672   -336   
944    336    
-336   -256   
-128   80     
-96    -432   
144    0      
272    16     
-368   464    
48     -400   
-112   48     
-16    -368   
0      0      
-320   240    
32     48     
64     400    
-928   112    
-288   -176   
-80    832    
-896   -144   
80     320    
912    -48    
-752   48     
-32    -144   
-128   -208   
496    352    
-656   240    
48     80     
-208   -144   
-16    -32    
368    -160   
-320   48     
-128   -176   
112    -80    
0      48     
32     64     
-128   80     
224    -64    
-160   -32    
-160   32     
-144   80     
-272   16     
624    0      
-640   -208   
32     160    
-16    64     
-80    48     
-176   512    
-704   480    
2992   240    
-2000  304    
496    -96    
-864   -144   
-1072  560    
640    224    
64     256    
-272   -48    
0      48     
48     -192   
112    80     
-320   64     
432    224    
-432   48     
16     112    
112    416    
-416   176    
272    32     
-112   -32    
-288   224    
16     496    
1920   -208   
-656   576    
-576   720    
224    80     
576    -16    
-256   192    
16     32     
-256   -64    
112    96     
16     16     
-48    64     
-32    48     
-32    -128   
-16    144    
-400   -16    
-80    -16    
-144   -176   
368    -16    
208    96     
-64    160    
80     384    
-224   240    
-432   -208   
288    -528   
-160   16     
-576   32     
368    -64    
208    464    
-944   496    
64     16     
-96    304    
-80    -112   
-768   288    
512    -480   
-272   336    
576    112    
-256   -80    
-256   128    
192    128    
208    -32    
-64    -16    
-176   208    
-240   -80    
-144   1104   
704    -96    
-560   -80    
-16    -816   
16     -272   
1664   1456   
-1968  816    
352    -720   
624    48     
-464   608    
-608   96     
0      32     
656    448    
16     544    
0      -224   
-80    384    
-80    -240   
144    240    
-48    128    
-368   224    
176    1056   
224    -32    
32     128    
-224   -224   
0      544    
48     64     
64     -160   
-272   144    
416    560    
-64    896    
48     624    
-224   160    
-48    192    
-96    208    
336    736    
-256   -80    
272    112    
-64    -96    
-112   256    
352    208    
-112   112    
336    832    
-480   736    
-64    -720   
112    -1040  
-16    -160   
-464   288    
-208   16     
288    48     
240    -304   
-320   -320   
-32    -64    
128    -368   
16     240    
-112   224    
-32    -32    
-352   -928   
304    -1120  
160    -1024  
-176   -784   
192    1232   
32     576    
-160   1072   
-240   1184   
-208   -832   
160    160    
224    160    
64     144    
-176   240    
-288   480    
224    112    
64     352    
0      -480   
-16    64     
-112   288    
288    48     
32     144    
-64    -48    
-16    176    
96     -32    
128    -352   
-720   -512   
-80    -192   
336    -160   
304    -128   
-528   128    
-544   768    
1088   -400   
-560   704    
144    240    
-224   -224   
-176   -304   
-288   192    
96     0      
-96    -416   
-160   -224   
160    64     
256    64     
-112   -16    
-16    32     
-48    -32    
0      -144   
288    -224   
32     -96    
-256   -64    
-288   -336   
560    -1040  
448    144    
-16    -16    
-80    -384   
-96    0      
208    -608   
336    416    
-192   544    
-144   320    
-16    -288   
288    128    
144    512    
-64    704    
-16    -512   
0      -64    
240    -16    
64     240    
-336   336    
64     -16    
256    -80    
80     288    
-144   0      
-112   -48    
128    48     
160    128    
-272   224    
-16    -288   
32     96     
-48    -144   
1152   -112   
-2448  -144   
544    -640   
192    -32    
-704   432    
1088   272    
-624   -208   
-80    -128   
48     -80    
272    336    
-192   -144   
-96    64     
288    64     
176    240    
-704   64     
320    -80    
48     80     
-80    -288   
-208   -240   
80     -128   
64     208    
560    240    
-1744  912    
832    -32    
-240   192    
-320   -192   
608    240    
-368   272    
-64    -288   
16     128    
336    -304   
16     64     
-224   -240   
-64    144    
304    16     
-160   144    
176    -432   
-304   -16    
-64    272    
-272   496    
64     16     
256    -64    
304    832    
-1232  160    
-240   -224   
480    32     
-32    416    
400    -208   
-1072  -592   
-32    -1104  
384    -16    
48     -272   
-192   240    
-160   96     
336    48     
384    320    
-416   640    
-176   400    
128    384    
-368   336    
336    16     
400    -80    
-464   -800   
-80    0      
320    0      
224    -464   
-736   224    
144    -400   
-560   64     
144    192    
2112   -1248  
-3472  -480   
1344   -288   
-112   -592   
-336   208    
656    -720   
-640   224    
-272   -96    
176    384    
448    -336   
-704   256    
32     48     
-96    176    
240    192    
-112   -160   
-400   176    
304    32     
-528   128    
176    -656   
1088   528    
-256   -736   
-320   160    
288    -16    
-800   -272   
704    -1088  
448    -48    
-768   160    
416    144    
-144   160    
352    80     
-192   64     
272    -256   
-240   -16    
528    208    
-592   -64    
224    160    
192    32     
144    16     
64     64     
-240   -144   
208    48     
-288   -64    
352    -128   
176    240    
-432   -352   
176    -112   
320    -848   
-608   -1808  
240    96     
-336   64     
608    -48    
0      -448   
336    -432   
-496   176    
368    -144   
320    -80    
-256   128    
0      -144   
-384   192    
160    -192   
192    -288   
-16    -32    
-80    -96    
-112   128    
208    -64    
160    -208   
64     -2592  
-144   -16    
32     80     
-272   -256   
208    -448   
144    128    
-16    -224   
224    32     
-144   160    
16     208    
-512   0      
144    -224   
224    608    
-192   208    
-304   -240   
1520   880    
-144   384    
-896   64     
256    -80    
16     -336   
64     160    
176    -128   
144    432    
-464   32     
304    -432   
-224   -80    
-128   -80    
-64    -272   
16     -224   
352    -352   
-112   176    
192    -32    
-256   -2016  
-32    -16    
240    -208   
640    272    
-1488  512    
752    -512   
240    288    
-48    -32    
-304   -48    
-288   -48    
-1072  -224   
80     -80    
448    -64    
-80    -352   
-384   144    
336    -400   
48     192    
-176   320    
176    -16    
-80    80     
-176   -208   
80     -96    
320    16     
-256   128    
-176   480    
80     144    
-112   -192   
-208   -240   
-240   -240   
96     64     
192    -528   
-64    272    
-608   -672   
176    240    
928    -672   
-480   -224   
-80    144    
48     -160   
32     -256   
496    -656   
-752   -368   
80     -496   
-176   -256   
128    -208   
-48    48     
0      -64    
0      224    
480    -1088  
-160   -80    
-64    128    
336    208    
-80    176    
32     -32    
320    1280   
-688   -976   
-1472  -32    
2192   -528   
-880   32     
80     528    
-160   -272   
-512   -528   
576    80     
-176   -624   
256    0      
-272   304    
-144   0      
256    -48    
-96    96     
48     -32    
-96    -32    
-48    -16    
-80    -352   
-128   -16    
0      -224   
-32    192    
288    128    
-240   -160   
-784   -400   
576    -224   
-112   -848   
-128   192    
560    80     
64     -144   
-240   80     
-128   400    
112    320    
-128   -592   
544    416    
-800   576    
352    -176   
208    -864   
-96    32     
16     -176   
-240   -80    
0      -176   
-752   128    
144    80     
80     -144   
112    224    
752    496    
-240   -336   
-896   -112   
416    80     
96     -1392  
-2128  -96    
-32    -544   
352    784    
1088   448    
-1168  -720   
-736   -1904  
144    -336   
240    272    
96     -528   
16     448    
-400   -128   
-128   400    
288    -272   
288    320    
-384   -320   
-256   -16    
48     -608   
112    -640   
-96    -1024  
-384   160    
-64    592    
416    144    
32     -96    
-752   512    
192    304    
-176   -400   
672    320    
80     1792   
-128   208    
-176   -192   
-32    128    
416    368    
-48    704    
-400   112    
144    -464   
448    544    
-352   144    
144    -176   
-240   -416   
-16    -192   
208    176    
-64    304    
160    -464   
-320   -688   
560    464    
-400   96     
-16    -464   
-576   -432   
96     352    
48     -336   
560    80     
-608   224    
-368   80     
224    0      
48     80     
-240   -704   
192    -1728  
-384   -16    
176    1376   
-96    112    
48     -112   
96     96     
0      48     
112    640    
-464   608    
80     288    
160    -176   
96     112    
-128   512    
-128   144    
-80    -528   
128    -112   
-320   0      
0      320    
128    128    
-272   -448   
336    -800   
64     32     
-240   80     
544    1392   
-1152  1472   
208    -208   
464    -832   
-368   -1168  
-144   752    
768    496    
-112   576    
-240   512    
0      224    
64     128    
144    -80    
80     -208   
-320   528    
-128   16     
224    80     
240    -336   
-368   0      
-64    240    
-16    0      
336    736    
-512   176    
496    96     
-528   800    
-160   -160   
96     64     
48     416    
96     224    
-176   -144   
80     -160   
16     16     
-48    64     
16     -256   
64     -240   
-288   144    
624    864    
-304   832    
-32    64     
-272   -144   
80     -48    
0      192    
-80    96     
240    112    
-208   16     
176    16     
-320   0      
224    -48    
0      176    
0      112    
-112   112    
-864   -608   
960    -32    
-128   192    
-704   -112   
528    352    
576    0      
-816   -64    
256    -480   
240    96     
-336   -176   
240    224    
-32    32     
-128   176    
192    -128   
-304   32     
256    -128   
-96    224    
400    192    
-224   160    
256    48     
0      96     
-128   -512   
-1136  1072   
864    112    
-512   144    
304    -80    
-176   32     
-32    144    
-240   48     
-352   -16    
368    64     
-64    0      
-16    32     
0      144    
-160   16     
-128   160    
384    16     
-32    64     
160    -416   
-480   240    
544    48     
64     48     
160    320    
1232   400    
-816   -48    
-912   848    
432    208    
288    -192   
-16    -400   
-368   416    
-176   304    
400    32     
336    144    
-672   96     
-224   496    
592    304    
496    352    
-416   112    
-576   336    
-32    -32    
544    -192   
288    112    
-112   -1120  
-272   176    
592    144    
-208   -736   
-208   224    
-288   256    
512    -16    
256    208    
288    -4048  
-2688  -416   
1648   -560   
-512   96     
112    -16    
-368   48     
592    48     
96     320    
-288   16     
-64    368    
832    -80    
-480   112    
48     0      
96     304    
336    -144   
16     256    
416    96     
-896   -64    
304    -240   
1168   -688   
-944   -48    
448    176    
-592   144    
144    224    
528    -32    
-640   112    
624    80     
-80    320    
-160   64     
128    448    
288    176    
-240   384    
240    -160   
-576   -144   
80     -176   
304    224    
16     240    
-256   -720   
512    32     
16     -128   
144    64     
-240   32     
144    160    
240    -96    
-480   -32    
-16    -464   
176    304    
-48    64     
32     416    
352    368    
-128   80     
192    656    
-16    -144   
-176   128    
368    -384   
-128   192    
96     272    
0      32     
-160   -240   
352    160    
160    208    
-48    16     
-64    32     
80     128    
64     -128   
48     -32    
-16    272    
0      160    
240    304    
-336   -64    
208    0      
-96    -800   
176    400    
144    112    
-64    64     
-144   -192   
48     80     
240    32     
-288   160    
32     256    
128    -96    
0      1504   
1776   -960   
-1664  128    
-368   -128   
1136   1008   
448    64     
-704   176    
-32    192    
384    80     
32     -48    
48     -16    
64     -384   
-64    -320   
128    -272   
240    -112   
192    592    
-128   256    
112    544    
-96    176    
-112   64     
736    368    
-912   944    
864    -288   
-432   672    
-48    -192   
-272   -448   
384    -752   
-64    512    
64     608    
96     112    
-80    64     
0      -208   
-64    320    
48     -128   
32     -176   
272    -352   
16     368    
128    -128   
-16    704    
-16    -336   
-32    -384   
208    -928   
-64    -128   
-80    -2528  
240    -352   
-160   480    
0      -80    
96     -208   
144    -112   
-16    128    
-1696  -784   
1728   -1904  
224    -688   
-1632  80     
1120   208    
240    160    
-1152  -384   
496    1120   
240    240    
-336   -768   
192    -816   
-64    32     
-176   -32    
128    -144   
464    -1200  
-160   -176   
-144   -224   
368    528    
-32    -240   
-64    -192   
160    912    
544    -816   
-3184  80     
1760   -1120  
448    -384   
-1328  160    
816    816    
624    144    
-48    448    
-192   192    
-32    -64    
-176   -224   
64     -384   
0      -192   
16     128    
-608   -48    
256    0      
-656   -336   
-288   864    
544    800    
32     384    
-96    272    
112    -144   
48     -544   
-640   -1184  
448    -1328  
-352   -816   
-752   64     
576    -336   
-176   384    
480    -64    
-160   112    
-32    -272   
-448   80     
160    240    
32     0      
-624   752    
1008   656    
-848   224    
0      -624   
256    -80    
-96    -112   
192    16     
-624   80     
96     -16    
176    -32    
80     -96    
-256   -848   
-64    -464   
-224   192    
912    -128   
-2656  128    
592    1056   
1264   336    
-368   -176   
-320   1040   
-176   1216   
224    224    
400    224    
-80    0      
-240   160    
-368   -560   
-16    -384   
368    -32    
-688   -16    
-32    272    
-208   176    
-144   -464   
-80    -800   
-80    -1136  
0      432    
32     -1104  
416    560    
320    32     
-816   112    
768    -288   
-480   -752   
288    -1728  
-48    -352   
368    768    
-144   480    
-208   -208   
-16    -208   
176    -160   
80     -144   
16     352    
272    -1248  
-624   -672   
128    -624   
320    -848   
-1056  -800   
0      -704   
48     320    
256    592    
-336   -704   
-512   -496   
336    416    
-96    -416   
544    256    
-160   336    
-128   464    
480    592    
256    -64    
-288   -992   
-368   1408   
1568   -544   
-1168  -928   
368    -64    
128    -448   
-592   -672   
-240   -464   
-80    -256   
336    -752   
-544   -320   
-752   -240   
96     560    
256    160    
-192   208    
0      448    
-96    432    
208    208    
-16    32     
-112   16     
224    96     
16     64     
144    64     
208    784    
-688   256    
-80    16     
-304   16     
-256   80     
-112   -2144  
-512   512    
640    32     
-672   -256   
-48    -400   
-256   -272   
400    -224   
-320   32     
-144   272    
-112   176    
32     208    
-112   16     
0      -368   
-96    -48    
-144   176    
80     -208   
-224   -224   
-160   -16    
-32    48     
-288   -208   
-80    -960   
-288   464    
720    112    
-608   -32    
-144   48     
128    -16    
-96    80     
320    -112   
-320   240    
64     64     
-416   144    
384    -208   
-80    48     
48     16     
-256   80     
-144   128    
208    -16    
-608   -64    
-192   144    
32     112    
192    192    
-128   0      
256    32     
-272   208    
-224   80     
16     400    
176    -32    
-16    32     
128    -128   
-1008  -1392  
-1664  -784   
2624   368    
-544   -144   
-464   304    
96     -192   
464    128    
-96    -736   
-320   256    
256    -160   
80     256    
32     -48    
-384   144    
144    -224   
-32    208    
48     -144   
-176   96     
272    96     
-432   -48    
176    112    
-544   -80    
-96    -528   
-1104  640    
1232   -208   
128    176    
-512   -320   
352    -480   
-176   -176   
-592   16     
32     128    
256    64     
640    192    
-176   -16    
-432   -64    
96     96     
-608   -48    
352    32     
16     192    
336    -176   
-496   -272   
-256   32     
320    -288   
624    -80    
-496   112    
336    224    
-512   -208   
-816   -336   
864    416    
128    -480   
304    464    
-720   256    
128    144    
704    -480   
-160   -32    
-256   128    
-208   -64    
400    -272   
288    -176   
80     400    
-464   208    
304    0      
-288   -16    
240    64     
-32    -16    
-112   96     
-48    176    
-224   64     
-144   64     
96     64     
368    752    
-1536  -1840  
-848   672    
2016   768    
-1536  -176   
176    544    
704    176    
-800   -16    
0      336    
544    -112   
-16    0      
-32    16     
-32    32     
32     224    
-320   64     
464    224    
-128   96     
-288   128    
320    -48    
320    368    
-672   416    
384    496    
416    0      
-432   0      
96     160    
208    208    
-256   0      
144    48     
240    128    
-272   224    
-112   176    
144    240    
144    -224   
32     -176   
-240   -112   
288    304    
256    416    
-304   48     
112    64     
32     -16    
-32    176    
-96    -16    
-48    16     
-48    -288   
80     -272   
464    -48    
-160   48     
48     256    
336    304    
-192   272    
144    -80    
96     -128   
-304   -928   
144    32     
96     928    
416    1072   
-576   160    
208    -64    
160    -48    
-192   16     
32     -48    
96     16     
-160   -1008  
-336   -272   
384    -96    
-400   -240   
384    16     
-160   -208   
-48    208    
-64    -480   
336    32     
-32    112    
32     160    
-144   -32    
128    -96    
64     -64    
-64    -144   
-176   96     
48     912    
-32    368    
-176   -16    
-112   -832   
864    -752   
-656   512    
160    -720   
-336   -144   
-48    704    
368    -64    
112    560    
16     -144   
-224   32     
64     -32    
48     -144   
80     -112   
-32    304    
-96    160    
64     48     
-80    48     
16     -656   
64     448    
112    -832   
-80    224    
-528   1072   
992    128    
-736   208    
-112   48     
160    -96    
-96    -304   
320    -1104  
256    320    
-304   832    
-112   336    
48     -384   
208    -416   
320    32     
-224   -672   
-16    160    
208    80     
240    272    
-80    128    
-240   224    
224    112    
224    64     
-16    -64    
-176   144    
-16    208    
352    432    
-16    288    
-192   80     
32     -16    
336    -336   
-352   -368   
2144   -1328  
-1984  896    
944    -128   
704    -64    
-720   256    
448    256    
288    -560   
-352   480    
-112   688    
160    -576   
192    -128   
128    256    
96     16     
-288   -144   
64     -96    
224    -16    
-112   -96    
-320   -48    
224    256    
272    -176   
-672   352    
2032   -432   
-1024  432    
288    -512   
-176   -992   
160    -464   
-640   -1296  
96     -1648  
64     -1456  
-208   -272   
320    16     
-48    752    
-48    240    
400    832    
-560   -96    
16     240    
352    944    
96     1248   
80     1104   
176    128    
80     160    
-48    -16    
-16    -16    
720    -688   
240    -208   
-736   -816   
208    720    
240    -1280  
-512   736    
512    80     
320    160    
-352   -256   
-240   256    
16     192    
496    -640   
16     -336   
-64    32     
112    1072   
576    192    
-64    256    
-144   -96    
192    272    
448    336    
448    416    
-432   -448   
-368   160    
-192   -272   
464    -352   
240    -144   
-144   -672   
992    -1440  
464    -80    
112    192    
-304   176    
-160   576    
96     0      
480    432    
-304   -112   
-144   304    
-224   -704   
352    -1776  
240    464    
-176   0      
-160   -176   
192    -256   
64     -384   
0      -288   
64     -32    
-16    48     
304    640    
112    160    
-368   0      
-320   -1008  
1280   -2368  
-800   -688   
672    -448   
-384   400    
224    -160   
128    -560   
-48    64     
112    -176   
-160   -112   
368    -288   
-96    -32    
-48    96     
-80    -224   
128    32     
144    48     
-16    96     
144    432    
-64    448    
64     -208   
-288   -656   
-144   -384   
-80    -48    
240    224    
288    560    
-160   0      
32     48     
80     -1472  
-32    -128   
288    928    
1008   656    
32     -48    
-1104  -384   
624    -1328  
160    -64    
-272   144    
-384   240    
-496   256    
-32    192    
224    112    
240    -32    
0      -64    
-224   -688   
432    256    
112    -128   
-192   -384   
-48    16     
240    352    
112    -192   
160    32     
32     160    
-256   0      
-80    80     
176    -192   
-32    -320   
-16    -304   
-16    112    
96     -32    
-624   592    
1808   -1696  
-1264  64     
160    -240   
432    -32    
-224   -112   
-176   272    
-128   -352   
-144   416    
272    -240   
32     -192   
-896   -48    
-64    -64    
144    -288   
256    -352   
-160   -80    
192    -1344  
-224   320    
48     -176   
288    96     
304    -528   
-1072  656    
592    -128   
-304   -48    
-288   -32    
624    -128   
-800   336    
16     144    
-528   80     
688    -400   
-192   80     
-448   -176   
288    160    
0      -416   
96     144    
96     48     
16     -64    
-560   -144   
576    64     
-144   48     
80     0      
-32    -32    
0      64     
160    144    
-64    -48    
-272   224    
400    -112   
-336   48     
304    -1376  
224    368    
-112   448    
176    1136   
688    128    
-240   -240   
-32    112    
64     -224   
96     192    
80     -400   
-192   48     
352    -112   
-400   112    
96     -192   
-160   -80    
352    0      
0      -144   
-112   128    
16     48     
16     32     
-64    -32    
128    -80    
-176   -528   
960    0      
-848   240    
1136   128    
-544   -48    
-1168  224    
720    -256   
0      496    
-336   -112   
-592   176    
384    112    
-1024  -64    
-240   96     
32     -192   
-64    128    
400    -16    
-272   80     
-16    48     
16     48     
-80    -144   
112    128    
192    528    
-608   -208   
0      336    
496    -32    
-720   -16    
-304   -240   
-368   -448   
128    336    
-352   240    
-448   0      
432    176    
-272   -176   
-304   -80    
224    -64    
128    96     
272    -32    
144    544    
-880   128    
128    -16    
352    128    
-208   0      
-80    48     
-48    112    
-16    -96    
720    -256   
-288   112    
-128   -288   
0      96     
-1216  -2304  
1824   -1296  
880    336    
-2240  160    
-16    224    
656    -160   
432    -48    
-480   144    
-784   160    
368    32     
-272   0      
64     -80    
-160   -128   
-96    16     
144    64     
240    0      
-464   48     
-80    112    
-288   -48    
400    -272   
-848   -1472  
176    -1040  
-336   -368   
128    176    
576    -144   
-384   -480   
-960   -208   
288    176    
288    192    
128    224    
-368   -464   
128    224    
128    128    
-624   -32    
592    304    
-288   240    
64     -720   
-208   -160   
16     -160   
-368   -32    
160    176    
64     -112   
-336   -64    
192    -304   
-80    -256   
96     32     
-48    272    
-384   176    
464    -112   
-80    -288   
-464   -480   
-96    112    
-320   -64    
1024   -16    
-208   -96    
-400   -112   
128    -448   
272    -544   
-928   -1088  
-272   -608   
48     720    
32     1008   
64     384    
0      -384   
64     -160   
32     -384   
-64    112    
176    320    
-64    -624   
-64    48     
0      -160   
-128   64     
16     96     
128    -80    
48     400    
-272   400    
48     80     
384    592    
-192   960    
192    -304   
224    64     
-144   272    
-560   1104   
464    -64    
-336   -224   
-480   288    
16     -96    
112    -96    
80     -384   
272    -144   
16     -288   
-48    64     
48     128    
128    208    
-176   96     
-176   160    
272    -32    
16     -176   
32     80     
-160   128    
-128   192    
-288   -400   
1072   -576   
-64    672    
-128   48     
-528   656    
384    -144   
176    16     
-128   288    
-32    -64    
-240   -368   
208    -32    
336    240    
112    224    
-352   -64    
64     -48    
-128   32     
0      16     
32     -48    
96     176    
-32    96     
-224   176    
320    0      
96     0      
-144   208    
416    112    
-512   -80    
-160   80     
-32    144    
-384   -176   
480    -496   
0      240    
1344   304    
-2528  800    
1584   512    
-48    1168   
-848   768    
160    224    
32     80     
-48    1248   
-112   -1152  
0      480    
64     -128   
352    272    
-176   96     
-48    688    
-48    -32    
-32    224    
112    368    
-16    -464   
-96    256    
16     16     
-320   544    
2352   -96    
-1440  0      
-176   -240   
976    -1152  
-224   -1600  
-752   -1200  
560    -224   
-16    -464   
-352   -640   
496    -416   
-176   32     
-304   128    
336    432    
-32    128    
-192   160    
96     -64    
-400   0      
240    144    
-128   48     
-64    -32    
336    -128   
192    -144   
32     -96    
-1472  560    
480    224    
-176   816    
352    -368   
304    512    
-384   224    
-48    128    
224    -512   
-96    16     
-96    -112   
-240   368    
960    1392   
640    544    
-416   272    
432    -528   
-176   64     
544    -960   
176    464    
-480   192    
-128   -64    
352    -128   
272    -96    
-288   32     
16     448    
48     -304   
1456   1856   
-1744  1104   
1136   -240   
976    -176   
-800   -144   
176    320    
-128   32     
368    -176   
112    304    
-32    -144   
-384   -16    
288    32     
192    -16    
160    304    
-144   176    
-480   240    
560    32     
-48    208    
416    32     
-928   -672   
224    -912   
304    -592   
-80    176    
160    272    
80     -16    
-208   560    
160    240    
-304   -16    
592    -688   
-464   -288   
288    -112   
-224   -208   
272    -256   
112    64     
128    -16    
-96    352    
192    -368   
-64    -48    
16     -1056  
-96    160    
-80    160    
32     48     
384    0      
-16    224    
304    96     
96     208    
-112   96     
208    -48    
-64    32     
96     16     
352    192    
-208   -80    
432    448    
528    -160   
-320   -16    
0      -1040  
320    368    
-112   -96    
-32    -464   
-528   16     
400    144    
256    -128   
-80    112    
-64    272    
-112   -256   
112    0      
240    480    
352    208    
-320   -592   
-128   320    
304    16     
48     -16    
-144   -16    
-16    144    
96     288    
32     -64    
144    -16    
96     -1232  
-144   112    
-16    -112   
-528   -944   
1664   -464   
-1344  720    
-32    -592   
592    -512   
-960   240    
448    -240   
176    384    
272    -448   
-544   32     
320    -224   
304    80     
-32    -64    
-208   48     
288    -352   
-16    496    
-16    -384   
-64    -32    
32     0      
16     16     
160    -96    
-320   -992   
1216   -480   
-544   -1712  
-576   272    
544    32     
-336   -416   
-64    32     
-48    -880   
160    -176   
-96    -192   
224    -144   
96     176    
-128   0      
192    -848   
16     -64    
-432   -416   
656    -16    
-208   -48    
176    -64    
-336   16     
448    -304   
-192   -32    
304    -64    
-144   -320   
-208   -384   
544    -48    
-336   336    
288    -224   
-32    -640   
48     192    
-1088  -880   
-32    464    
224    -48    
512    144    
-288   -272   
-80    16     
-144   -464   
256    32     
240    -112   
160    32     
-352   0      
96     -176   
272    96     
-352   -352   
256    272    
-64    -96    
160    96     
-80    48     
-32    -48    
-128   16     
672    1072   
-1376  -480   
-320   16     
592    -80    
-352   -320   
384    80     
-176   -368   
16     544    
992    80     
-416   0      
-128   32     
16     80     
48     0      
48     -176   
96     -32    
-416   160    
48     -320   
-80    -96    
-336   272    
192    -304   
-192   -304   
336    -144   
336    32     
-816   -512   
336    32     
176    -32    
160    -256   
-640   288    
368    -16    
-224   -80    
-208   -48    
-192   16     
272    -144   
-624   -192   
-208   -48    
176    304    
432    176    
-624   288    
528    -128   
-144   16     
-64    -80    
336    -48    
-192   80     
64     -96    
0      240    
96     32     
80     -48    
64     -128   
-1104  -928   
816    464    
320    -384   
16     64     
1792   -16    
-1200  -1216  
-784   -64    
1120   32     
448    -64    
-480   16     
-304   -48    
-480   160    
416    -112   
48     144    
-256   -144   
-256   32     
384    -288   
176    0      
-144   -544   
-400   -384   
656    -1360  
-192   -576   
48     -144   
80     464    
-624   -80    
160    -240   
208    48     
208    -16    
-368   -384   
224    -624   
16     -432   
32     352    
176    -320   
-80    -368   
144    352    
-112   -160   
352    208    
-544   -288   
240    -912   
224    -624   
-256   112    
144    272    
0      32     
272    224    
-144   128    
224    -528   
-16    -1328  
-528   -704   
704    656    
-256   1264   
-128   -1248  
-448   -192   
208    400    
-1376  176    
1136   624    
-944   1040   
-416   192    
336    -368   
-128   80     
112    -112   
-96    -96    
-112   -272   
288    480    
-368   -464   
-128   256    
-224   -256   
16     -288   
352    -304   
-160   -96    
-464   272    
160    96     
-80    16     
-48    64     
-48    112    
-144   32     
32     -176   
208    -80    
-32    80     
-32    -336   
-224   -80    
0      80     
96     80     
208    480    
-704   192    
32     -80    
96     80     
96     -144   
-480   288    
-176   336    
288    -64    
112    -224   
-16    -144   
-352   320    
48     -64    
224    48     
336    -144   
-800   96     
80     -32    
176    -320   
-128   16     
0      32     
-176   -64    
160    -320   
-832   128    
-208   96     
-80    336    
-32    112    
-16    32     
128    32     
-240   976    
96     -48    
496    -352   
-80    160    
-560   512    
304    -64    
144    -320   
-144   80     
-128   80     
128    816    
-160   160    
208    208    
240    -48    
-208   80     
128    -112   
-160   -368   
32     -48    
0      112    
96     80     
-224   96     
304    -144   
-384   416    
0      640    
-144   1360   
2368   -208   
-1216  -464   
96     -528   
48     -256   
80     -304   
368    608    
-1008  -1152  
-272   -400   
384    480    
80     624    
-96    -192   
48     -176   
-528   -224   
352    128    
32     208    
-144   -304   
-368   -608   
224    -384   
-112   -96    
352    48     
-2128  912    
1056   176    
-160   624    
-784   -32    
64     -752   
80     -272   
160    496    
-608   -32    
496    48     
32     16     
-304   208    
-336   32     
416    64     
-176   -80    
-400   192    
288    176    
192    304    
336    304    
-80    -16    
-176   96     
-128   -128   
-368   -96    
-352   160    
416    752    
432    -320   
16     64     
-304   176    
96     80     
304    672    
560    -16    
-368   -32    
-16    0      
112    -112   
544    496    
-448   176    
-480   672    
1072   -176   
96     -112   
-32    240    
80     192    
-176   96     
80     272    
384    -176   
-384   528    
112    80     
-272   80     
432    64     
496    1072   
-1744  -304   
1216   112    
816    64     
-1104  -176   
-192   320    
0      -16    
448    -208   
-272   -64    
-320   112    
-112   -112   
48     480    
176    -128   
-16    176    
-112   -48    
-432   112    
352    96     
288    128    
-160   -32    
-32    96     
-512   -48    
368    208    
-384   272    
112    -112   
112    176    
-496   -208   
-112   -272   
-208   -304   
272    -96    
16     -48    
48     272    
-80    -80    
-48    304    
64     176    
64     400    
-128   288    
-192   128    
96     224    
-64    160    
-16    192    
80     256    
96     32     
-384   16     
256    192    
256    -32    
160    208    
256    64     
-352   304    
112    288    
80     512    
80     256    
0      208    
-480   80     
64     -752   
-80    -176   
432    688    
-1216  352    
768    96     
80     -320   
-768   -96    
352    -272   
-272   -80    
432    112    
-144   64     
-64    64     
-80    -304   
-192   -112   
48     -32    
-16    112    
192    -80    
-112   -1072  
-128   128    
176    112    
112    16     
0      128    
-32    16     
-128   224    
336    64     
-240   32     
288    144    
-272   -240   
32     -48    
1248   1760   
-2832  96     
432    -128   
1056   -1344  
-448   96     
144    112    
-640   368    
320    -592   
-32    -48    
272    352    
-208   160    
-96    -32    
144    32     
96     112    
-320   -160   
128    256    
224    -160   
-128   -32    
32     -432   
144    96     
-368   -640   
832    -352   
-512   432    
272    0      
240    -48    
-448   336    
320    -64    
272    -32    
-160   80     
-32    336    
-304   112    
192    -144   
496    -16    
-256   -16    
-368   -16    
320    -288   
144    16     
-336   48     
512    32     
-512   -16    
608    16     
-144   -32    
-16    64     
16     32     
64     -336   
-288   80     
176    -96    
-64    208    
176    -192   
-112   -384   
480    -464   
-1968  -64    
1840   -368   
-480   80     
-288   16     
288    160    
-288   144    
-48    96     
256    160    
0      -16    
64     144    
-128   -160   
96     192    
240    -240   
-496   128    
560    64     
-288   128    
16     -176   
240    -80    
-144   -112   
96     256    
272    -16    
-1472  880    
944    -32    
80     272    
-176   176    
320    -432   
-208   368    
-304   224    
32     -240   
48     -144   
224    32     
-176   64     
-32    208    
112    -64    
192    16     
-272   192    
-16    -96    
304    64     
0      -16    
-176   -208   
80     -464   
1120   576    
-704   320    
-80    -400   
592    160    
-336   176    
-288   -1328  
400    32     
224    0      
-144   -368   
-144   64     
32     -80    
64     -1024  
-112   96     
48     -80    
1056   32     
-368   240    
-128   176    
336    -96    
-640   112    
208    16     
-80    -160   
160    256    
144    -48    
144    -192   
-528   0      
-864   -96    
528    -112   
576    -496   
-896   -1248  
1216   -2576  
1008   -2512  
288    464    
208    272    
-512   -80    
736    1824   
32     1808   
-384   -208   
32     -400   
-64    -176   
240    176    
-160   288    
240    -112   
80     -352   
80     -544   
-448   -816   
160    16     
-112   -192   
240    -1152  
-96    -576   
-192   96     
304    400    
-144   320    
-64    1008   
144    608    
48     -64    
128    -432   
48     -480   
-672   -656   
240    -256   
-64    336    
176    -320   
208    -624   
-288   -1680  
0      -80    
208    48     
0      -656   
-560   -1040  
192    -304   
-64    -192   
176    -176   
-96    -144   
-352   -1248  
-416   -1344  
48     -64    
144    400    
0      -592   
-176   576    
16     -848   
-80    384    
400    816    
-272   -624   
-96    -320   
32     -304   
-304   192    
-224   224    
96     656    
304    1312   
-176   -224   
144    -560   
-96    368    
96     -416   
-192   48     
-32    -240   
-192   144    
224    -320   
-64    48     
-288   -336   
16     -368   
-176   144    
336    -80    
-32    112    
-80    -32    
-160   -64    
224    -64    
-272   -16    
448    -32    
-608   320    
-32    240    
592    16     
-192   -32    
144    -496   
80     -48    
480    0      
-144   -160   
-128   144    
320    -64    
-208   32     
304    -240   
112    -192   
-320   128    
144    -48    
-256   -96    
128    -464   
-208   0      
224    -784   
-160   -16    
240    496    
-80    448    
-128   320    
432    -592   
-1120  -16    
336    80     
-80    0      
240    -320   
-16    -160   
-144   -96    
-64    400    
144    -192   
352    -16    
-96    -192   
-576   -96    
208    64     
176    -208   
-368   400    
208    -352   
-272   256    
-64    784    
-64    -144   
448    -1056  
-768   208    
-16    416    
-304   -128   
464    -320   
-48    -224   
128    -208   
-800   368    
-320   192    
-800   -64    
-224   -128   
-1440  -704   
1200   416    
592    -640   
-928   -304   
-1680  208    
1856   -272   
-1968  48     
-416   -32    
208    -512   
-496   16     
-304   -16    
48     176    
-80    -112   
144    -112   
-32    -224   
-160   32     
-208   -128   
0      48     
176    -96    
-96    -32    
-240   -160   
864    -816   
-1680  176    
832    -256   
80     64     
-832   -128   
784    288    
32     96     
80     -96    
0      176    
-320   32     
-80    32     
-192   -32    
160    256    
576    128    
-304   96     
-272   -176   
480    224    
320    -96    
-144   32     
-128   96     
32     16     
-704   656    
112    -160   
-112   -208   
-144   80     
80     304    
-16    688    
-784   400    
-704   -16    
432    32     
-112   -400   
-128   208    
-64    160    
-80    0      
-160   128    
-16    -128   
160    16     
-336   -272   
112    -368   
-32    112    
-16    144    
96     80     
-160   -16    
-1056  -320   
800    688    
560    -128   
-672   160    
432    144    
-112   2528   
128    3136   
656    32     
-1280  -96    
192    -720   
688    320    
144    -64    
-496   208    
-32    32     
-224   208    
-304   -144   
112    96     
-352   -192   
128    112    
0      32     
-224   -128   
-160   64     
224    16     
16     64     
336    224    
-1392  -128   
912    96     
-240   -160   
64     -32    
480    112    
-256   -16    
-416   208    
464    144    
-16    128    
-480   384    
464    -16    
-304   144    
192    -32    
-48    -48    
256    -64    
-944   -352   
544    0      
240    256    
-352   64     
-192   64     
-16    128    
48     80     
64     112    
-336   32     
176    32     
144    160    
0      -80    
-80    -80    
64     -128   
-192   48     
464    192    
-160   128    
-352   -656   
-96    0      
416    160    
-160   320    
336    336    
-336   -272   
80     -320   
-48    -160   
96     -176   
-80    128    
-128   0      
160    32     
224    160    
-80    64     
-464   -16    
224    -704   
-192   160    
224    1152   
240    -320   
-496   64     
144    368    
160    192    
96     -96    
-224   -32    
32     112    
-320   288    
304    -416   
32     -256   
-144   320    
944    3264   
-1824  -592   
-176   -160   
1248   -544   
-672   -112   
80     240    
-176   112    
848    560    
-160   112    
-160   -128   
-16    192    
-48    128    
336    32     
-160   32     
-256   -832   
16     400    
224    352    
-240   -176   
224    -384   
0      144    
-208   16     
784    144    
-288   160    
-560   -144   
448    32     
-128   112    
48     0      
192    -16    
160    48     
-368   400    
-144   64     
304    288    
160    -112   
-192   48     
-160   -192   
256    128    
0      96     
160    176    
16     112    
-176   96     
176    112    
64     96     
32     192    
-32    80     
-32    0      
96     96     
32     224    
-256   112    
224    112    
272    -80    
-1520  -1680  
-160   -48    
1232   -624   
-1440  -16    
720    400    
944    -80    
-1376  -176   
448    -192   
192    -160   
-128   112    
-160   128    
352    144    
-416   48     
96     -64    
96     224    
0      -144   
-48    48     
336    32     
96     -48    
-160   64     
176    160    
-272   -752   
384    304    
816    -400   
-2160  -112   
448    288    
480    -704   
-592   -112   
272    -176   
-416   16     
720    304    
144    160    
-368   112    
128    256    
288    240    
-80    32     
-80    112    
-96    -256   
-272   -48    
224    80     
368    -192   
128    80     
304    912    
-352   -384   
416    320    
-288   -1440  
-960   -1216  
960    -192   
272    608    
-720   112    
512    32     
112    80     
32     288    
48     -176   
576    -80    
16     -160   
-400   448    
288    -400   
-96    -288   
656    320    
368    -144   
16     16     
-224   400    
32     256    
352    -176   
240    128    
240    -16    
-320   -16    
464    144    
-48    208    
-928   -1312  
1728   -1808  
1312   784    
-1072  496    
-432   -944   
576    704    
976    976    
-128   -432   
-384   -64    
-48    624    
480    -928   
144    560    
-64    -208   
-176   256    
-128   32     
416    -160   
80     128    
-80    448    
96     320    
128    384    
64     416    
-128   128    
176    -1040  
256    160    
-96    -96    
-32    528    
112    -752   
32     -1232  
32     944    
0      -224   
208    -320   
160    384    
-208   48     
-32    -16    
112    48     
-16    -560   
-224   512    
272    -512   
128    -240   
112    160    
0      400    
-272   -208   
144    -80    
304    -224   
-32    -192   
64     176    
-240   -416   
368    176    
112    -832   
-160   -16    
-160   -176   
80     -384   
-96    -320   
368    -816   
-320   -1360  
80     -720   
-176   -480   
112    -304   
144    464    
-128   448    
192    288    
-16    -464   
32     160    
144    -64    
-16    32     
-144   -336   
96     -48    
368    704    
-160   176    
-336   -944   
32     192    
-64    -32    
80     -848   
0      -16    
-272   -272   
-272   -448   
320    288    
-16    496    
-80    704    
-448   -80    
272    -272   
16     -240   
80     -848   
-384   528    
752    464    
-672   400    
32     -48    
208    -320   
16     320    
-624   160    
-96    704    
224    48     
240    288    
-208   192    
-128   224    
-16    -80    
384    240    
224    400    
-96    144    
-160   176    
112    -432   
-96    752    
720    -416   
-672   -992   
-64    -608   
752    -736   
-256   128    
96     288    
16     -176   
0      -736   
160    144    
160    -1024  
-208   64     
-32    128    
320    144    
-16    0      
-272   80     
32     16     
-16    288    
-272   -288   
272    -816   
-352   -48    
-16    -624   
112    48     
-240   -416   
288    160    
96     -48    
-64    -80    
208    -160   
288    192    
-1008  992    
1072   288    
2928   272    
-1600  -384   
-1200  -304   
1488   128    
-624   288    
176    1040   
-160   416    
-64    304    
112    -336   
-240   -352   
448    -16    
-48    48     
-240   -16    
128    240    
192    -80    
-192   -16    
-80    -288   
16     16     
176    -128   
80     1008   
-208   -896   
-1568  112    
1312   -464   
-960   -192   
112    -256   
48     96     
128    -656   
560    0      
-480   48     
-16    -96    
-112   16     
64     64     
144    80     
-336   -256   
48     -48    
160    240    
-560   256    
640    -208   
-64    -128   
-128   -144   
0      -32    
-336   -512   
96     -240   
-48    -192   
32     16     
16     -240   
608    48     
192    -288   
-416   -80    
-336   128    
176    240    
-48    112    
272    48     
-288   144    
-608   -464   
608    -416   
192    -192   
16     448    
-288   176    
-384   96     
256    224    
480    -48    
-112   -272   
64     224    
-48    -224   
-480   80     
832    80     
-48    -256   
-992   -160   
3024   -3072  
-224   1504   
224    576    
-112   -80    
32     448    
256    -96    
-416   48     
304    -176   
-208   32     
-80    -80    
-192   288    
384    -288   
-272   96     
192    -496   
32     192    
-320   -304   
192    208    
256    -288   
-1232  -352   
-80    -16    
-784   48     
-336   -32    
768    -64    
-48    -32    
-464   -48    
208    128    
64     -384   
32     -272   
-112   -400   
80     224    
64     -80    
-64    400    
64     -112   
16     208    
208    80     
-288   -48    
192    240    
-192   144    
-480   -48    
-496   32     
-32    -64    
32     -240   
-96    96     
128    0      
-112   128    
160    -192   
80     80     
-176   -80    
64     0      
-192   0      
-48    0      
-64    -640   
-496   -192   
-160   -144   
-768   -608   
176    -80    
-208   336    
-272   432    
-32    32     
48     -80    
-160   -32    
16     48     
-96    -16    
176    176    
64     48     
-64    32     
128    -16    
-288   -80    
112    -512   
-160   112    
-16    400    
-288   16     
-144   -80    
0      -192   
160    208    
-96    -208   
0      -192   
-128   240    
96     240    
80     96     
256    -1280  
-1808  1520   
1680   -96    
-240   592    
496    -672   
-704   112    
-144   896    
-464   672    
320    -400   
160    -96    
-208   288    
-208   48     
256    -160   
-256   -192   
-128   -864   
80     32     
48     224    
32     48     
160    320    
-208   -304   
-144   448    
80     1232   
240    80     
-960   96     
1296   -32    
-704   928    
-32    256    
304    80     
-48    208    
-368   -16    
64     16     
608    240    
-368   288    
-128   80     
-544   -64    
432    -80    
80     48     
-224   64     
-80    144    
96     -112   
96     0      
128    80     
-32    48     
-112   144    
176    32     
48     -112   
-272   32     
-16    112    
16     32     
16     -320   
1056   368    
-1120  1248   
-192   -368   
160    -384   
-784   -176   
464    80     
192    48     
96     32     
-448   -256   
160    -240   
176    -352   
-288   -256   
0      144    
400    576    
-560   192    
144    288    
144    -80    
-272   -384   
-288   -400   
-16    -240   
-16    -80    
368    -496   
-1824  1056   
1744   208    
-960   272    
-624   -16    
784    -416   
544    -80    
-448   -64    
-112   -16    
592    16     
-256   80     
-128   176    
64     48     
-48    -192   
0      96     
-176   64     
256    592    
-752   576    
320    720    
176    432    
-288   192    
48     -32    
-80    1008   
96     928    
-672   176    
1072   -448   
-64    16     
-160   16     
80     720    
-16    384    
-272   352    
432    224    
-368   112    
1104   176    
368    656    
-448   -208   
144    304    
-448   576    
-224   608    
624    208    
-528   -16    
-16    80     
32     352    
240    -32    
-128   16     
304    192    
208    80     
-48    64     
-48    112    
-80    128    
-304   2384   
672    400    
-1312  -32    
-512   -304   
1744   1200   
-128   48     
-432   -1696  
-192   -528   
-112   1056   
464    160    
-112   -656   
-528   432    
32     0      
208    112    
-16    128    
32     -208   
-512   16     
96     240    
224    480    
64     640    
-32    96     
64     0      
-480   -32    
384    544    
304    368    
-64    -16    
-464   -80    
256    -144   
64     -576   
256    208    
-256   256    
-304   224    
208    336    
144    -176   
-432   -704   
144    656    
416    1072   
-208   352    
16     1584   
176    464    
160    32     
288    240    
-144   640    
160    176    
-208   -80    
272    -240   
384    592    
-336   1232   
-480   -720   
704    -48    
192    320    
-80    -1264  
-1184  -464   
288    -800   
672    -1232  
-624   -80    
-128   -800   
-336   -368   
480    352    
48     336    
-80    -976   
-160   -528   
32     480    
256    400    
-112   -400   
-32    16     
176    -704   
160    688    
32     800    
-48    48     
80     -144   
-112   176    
224    -48    
-32    256    
-96    1072   
160    736    
-144   96     
192    0      
448    -384   
-112   -304   
304    352    
-1488  496    
1168   -688   
336    -272   
112    704    
-304   1008   
80     336    
176    -544   
0      416    
112    400    
-48    -144   
-64    -64    
96     -64    
-48    -144   
-208   -224   
128    -160   
320    -192   
112    176    
-160   -1296  
160    80     
-16    -608   
480    1824   
-176   464    
-288   -208   
224    384    
144    -432   
80     -336   
-208   -80    
320    16     
80     -160   
32     -176   
112    -192   
-80    -96    
16     -432   
96     32     
16     -224   
64     144    
-128   224    
240    96     
-96    64     
192    64     
128    80     
-368   96     
352    224    
-336   -384   
192    128    
112    -368   
-64    160    
-16    -160   
-224   384    
-512   -720   
992    256    
-320   -48    
-544   0      
128    -16    
768    -448   
-464   -208   
32     -256   
128    16     
-96    -176   
-128   144    
320    48     
-224   16     
464    -32    
-288   -16    
112    -464   
112    240    
-400   64     
32     80     
352    128    
-144   -48    
-752   -240   
1136   -1184  
-576   32     
96     -192   
176    272    
352    -352   
-384   192    
-48    48     
272    64     
-64    -144   
32     304    
64     32     
-64    -576   
-112   -48    
-160   -32    
64     -992   
224    -224   
-96    368    
-688   320    
192    128    
320    -80    
-320   -224   
-32    -256   
1296   -304   
48     128    
-208   368    
320    368    
0      -288   
32     -176   
-1088  -160   
160    -16    
592    128    
-80    -896   
384    -272   
-224   -224   
448    -208   
-128   -16    
336    -592   
16     32     
144    -176   
80     -192   
368    -64    
-224   64     
-96    -112   
80     144    
624    -48    
112    -48    
-176   -176   
960    1056   
-1872  3520   
2256   -560   
-1360  -560   
-416   -80    
640    -224   
-400   -304   
912    -608   
-352   208    
-64    64     
80     176    
-160   144    
-160   -256   
-288   -64    
-448   -112   
-128   -64    
256    -16    
-112   96     
-112   -368   
912    912    
-912   480    
544    432    
128    -80    
-128   -160   
352    144    
-336   -80    
128    176    
176    -144   
-288   -16    
-48    96     
112    -32    
128    128    
-176   -64    
-16    -544   
16     16     
176    -1488  
-240   128    
144    256    
128    288    
-320   -192   
144    -128   
-160   -128   
-176   -176   
192    -192   
96     0      
-272   -16    
32     -176   
0      -16    
-16    -336   
304    544    
-160   -160   
-64    368    
160    80     
720    -224   
-864   -336   
32     -512   
368    -144   
112    400    
-688   688    
272    528    
-592   -80    
192    -32    
48     96     
-176   -64    
128    368    
240    80     
48     96     
-32    -80    
48     -192   
-32    -288   
-192   -272   
208    -272   
-192   128    
-16    144    
272    -32    
-144   32     
-128   -448   
-32    416    
224    32     
128    256    
80     -208   
-160   128    
-384   -1904  
128    400    
1248   16     
-496   -128   
-160   -32    
-256   -368   
288    -176   
128    -1136  
-112   48     
-16    0      
32     192    
176    -224   
-224   -256   
128    -64    
384    -32    
-96    48     
-304   288    
-160   -16    
176    208    
-352   -112   
528    -256   
-544   272    
192    -272   
-304   800    
112    -544   
208    -32    
-1296  -208   
48     208    
-224   -336   
-32    400    
224    -400   
-304   -128   
-352   -608   
-928   352    
16     320    
-256   320    
400    -656   
0      480    
-368   -80    
-32    -272   
240    128    
16     -64    
16     96     
-32    -16    
-64    224    
224    -32    
-480   80     
64     32     
-96    688    
1792   1280   
-2576  -176   
-1552  -784   
2384   -512   
-1296  -48    
-304   624    
80     400    
-112   -864   
48     512    
-48    -416   
160    464    
-224   -128   
32     -48    
48     320    
-176   0      
-64    64     
-400   -112   
-128   608    
352    -144   
-160   256    
80     -96    
-848   -32    
1984   -400   
-432   720    
-1392  144    
400    -688   
224    -880   
-464   -656   
80     1904   
368    2576   
-512   480    
144    -896   
32     -368   
-1152  256    
80     384    
496    224    
-32    144    
-112   400    
-272   128    
-96    16     
320    -160   
-336   -160   
-112   -208   
-96    80     
-416   -1296  
-608   -368   
720    976    
-464   -64    
-128   -160   
512    32     
-288   -256   
240    -176   
-672   -320   
464    -144   
448    720    
-224   336    
256    48     
-448   816    
784    880    
-544   512    
-160   -144   
208    288    
240    -368   
192    -592   
-192   -560   
688    -496   
-208   512    
16     464    
48     432    
96     256    
-784   -1520  
1584   -1328  
1184   832    
-640   224    
-752   -512   
160    -1776  
-96    -1632  
320    432    
176    560    
-256   304    
-416   -80    
16     -176   
304    256    
-96    528    
-144   -416   
-144   0      
-96    -112   
-32    160    
-32    320    
-96    624    
144    432    
-16    176    
-320   -368   
-208   432    
448    -1056  
-576   -144   
32     112    
-160   448    
272    1040   
128    1264   
96     496    
-96    -496   
192    -800   
-48    320    
-64    224    
-384   48     
448    160    
32     400    
-64    128    
16     464    
48     -16    
-32    112    
-96    -192   
48     -224   
192    -432   
-880   -736   
96     -320   
128    -704   
-240   -480   
-32    -176   
0      288    
-16    -480   
-896   0      
496    720    
608    448    
-288   496    
-144   -128   
192    -224   
-160   -256   
112    960    
-432   672    
272    464    
352    -80    
-400   224    
0      -48    
-16    -160   
352    352    
-304   416    
256    976    
-224   784    
192    416    
224    -16    
-80    -112   
-144   -176   
16     -112   
64     -464   
160    -608   
-320   -736   
-16    -1264  
-32    -480   
-512   -944   
1120   -672   
-448   928    
128    -592   
-176   304    
-176   -128   
560    224    
32     304    
128    96     
-336   208    
48     128    
288    -112   
80     -96    
-160   272    
-32    -288   
128    224    
64     -288   
64     112    
128    336    
-240   32     
240    16     
848    1328   
-1488  -80    
-80    432    
1248   48     
-1152  -288   
352    -240   
-176   400    
224    224    
-416   480    
208    -64    
16     -160   
-80    -1968  
-224   -32    
272    80     
-96    0      
0      48     
-96    96     
48     16     
-160   112    
176    0      
112    96     
-16    -16    
-224   192    
-16    112    
272    -16    
80     32     
-336   -368   
112    128    
144    -336   
-32    240    
448    -480   
-1664  896    
1984   160    
-400   -112   
-1104  32     
1120   0      
-224   16     
64     -176   
208    -368   
-128   128    
-160   224    
-48    -208   
96     48     
192    -1792  
480    160    
-560   96     
416    48     
-288   80     
368    16     
-160   0      
-160   160    
592    256    
1328   16     
-1248  672    
1712   64     
-912   192    
16     -96    
432    -80    
-448   -960   
288    160    
32     0      
-16    128    
48     96     
16     -16    
96     0      
32     128    
128    160    
-304   480    
176    0      
-16    208    
208    48     
-352   -560   
-208   80     
384    16     
-96    144    
176    -528   
-496   -32    
96     480    
-160   112    
-320   -208   
608    80     
-80    -160   
-96    -64    
96     160    
80     -224   
-416   160    
368    -352   
-528   -112   
336    -288   
-32    496    
-128   -896   
-48    128    
144    -800   
-336   144    
256    240    
-192   272    
176    64     
416    80     
-368   64     
-928   -2752  
688    -480   
1440   -560   
-1792  768    
368    -320   
512    32     
-192   -400   
272    64     
-64    64     
336    -480   
-288   256    
608    80     
-192   48     
-208   176    
48     128    
528    -96    
-336   176    
-112   320    
32     64     
-160   -896   
-256   -576   
176    -240   
-192   112    
560    128    
624    112    
-688   80     
112    304    
80     -240   
-336   -384   
288    -160   
-352   -224   
256    160    
32     -288   
96     336    
-64    -176   
336    32     
-304   -144   
-128   16     
64     -1792  
64     144    
144    112    
-320   128    
144    192    
256    272    
16     -160   
16     -272   
112    -1344  
80     -672   
-208   208    
176    -368   
-192   -16    
48     -176   
176    1376   
320    -96    
-256   -2080  
-32    -544   
-176   -512   
240    0      
-112   -144   
-320   -768   
64     -208   
-144   -816   
32     -64    
224    -720   
-224   -672   
-256   -160   
-16    304    
384    -1248  
-16    -384   
16     480    
-208   1088   
80     -432   
32     -592   
-480   -208   
16     -368   
0      192    
48     160    
192    80     
-96    -784   
-16    368    
96     -272   
-336   -832   
752    -1680  
-304   624    
16     -864   
-384   -688   
-208   32     
224    -1088  
-432   -848   
112    368    
-320   0      
176    -208   
416    0      
0      -624   
-304   96     
176    -32    
240    176    
96     112    
-96    272    
-80    32     
-16    -352   
-48    -32    
448    368    
48     16     
-272   -256   
-704   480    
208    112    
32     352    
-16    -400   
-64    -80    
-16    -384   
48     224    
80     -48    
128    -208   
0      -80    
240    64     
-240   288    
160    336    
64     32     
-192   64     
-848   0      
704    -144   
-160   64     
64     -96    
-304   80     
32     -720   
-96    64     
464    -2720  
-288   112    
-64    16     
352    176    
-240   -960   
1824   -1744  
-1104  192    
960    128    
-400   -368   
-240   -176   
-112   -128   
128    -160   
560    -192   
-16    -256   
-176   112    
192    480    
256    32     
-208   -48    
-32    -224   
272    640    
64     -176   
-144   192    
-96    -784   
480    288    
-112   192    
-96    -1008  
-1360  1184   
1712   -432   
-976   208    
832    -16    
-96    -416   
-272   -560   
-1280  -1264  
608    -1584  
80     -1232  
-288   -176   
-32    320    
-112   256    
-432   224    
-16    -208   
112    -160   
144    112    
-688   32     
144    -192   
272    -272   
0      -880   
-48    -128   
-208   -400   
48     96     
672    1056   
176    1600   
192    992    
-432   192    
176    128    
320    -96    
-448   -336   
192    -320   
512    688    
-608   544    
336    208    
336    -368   
272    1536   
-1312  1280   
112    320    
80     -192   
-64    -48    
-48    -128   
-496   -80    
416    -352   
-240   -400   
96     -368   
-208   -128   
64     0      
0      -368   
-512   -576   
736    -224   
816    -48    
-640   208    
-1184  528    
640    48     
-288   -992   
-704   -112   
-192   608    
-144   16     
672    112    
192    -144   
-752   32     
-224   96     
0      -208   
912    224    
-144   224    
-528   96     
-112   64     
96     -352   
224    -848   
-320   -112   
80     208    
-800   96     
-272   96     
784    -336   
-352   112    
-256   -256   
240    208    
-80    -496   
192    -688   
-208   -368   
-80    16     
-160   160    
-144   0      
128    -48    
208    -176   
-384   -288   
-80    0      
176    16     
-16    48     
-80    0      
160    96     
224    160    
-448   -160   
112    144    
256    -288   
-208   272    
16     672    
528    304    
-48    0      
-336   -496   
384    -624   
-464   -32    
-96    16     
-1104  -160   
-32    128    
144    -16    
-80    256    
-64    -48    
32     32     
48     32     
-128   -256   
-192   -176   
64     16     
32     48     
-80    -16    
16     0      
0      80     
32     656    
192    -272   
-464   240    
112    -64    
-48    128    
176    128    
240    720    
-496   -64    
-80    -128   
272    176    
-48    -208   
-256   64     
-448   -2336  
272    416    
800    32     
-864   160    
576    64     
224    288    
-560   144    
-112   -128   
112    144    
128    -16    
-112   -32    
-80    -48    
-48    304    
96     160    
0      -160   
-128   -336   
96     160    
-256   128    
0      48     
80     -128   
0      352    
-544   -512   
-816   480    
992    -336   
-160   96     
-336   128    
-80    96     
304    208    
16     -48    
112    16     
-384   96     
-96    48     
192    80     
512    64     
-848   96     
144    48     
176    -96    
208    64     
-256   112    
96     176    
-16    112    
-96    96     
16     64     
-64    -96    
432    128    
-640   -64    
208    320    
144    -32    
-240   80     
-208   -688   
272    -512   
-48    -704   
400    -32    
-384   0      
-464   96     
816    224    
-80    224    
-336   256    
32     -32    
-224   80     
336    48     
32     144    
-192   -48    
-112   240    
432    48     
-416   144    
16     32     
272    144    
-224   -80    
272    80     
-64    176    
-848   -96    
1616   -320   
-208   -96    
-528   80     
928    128    
-96    224    
-352   -384   
112    192    
224    192    
-160   48     
-112   192    
480    192    
-208   -64    
-208   256    
368    32     
-80    48     
80     -48    
-240   16     
272    112    
-32    0      
64     0      
544    -32    
-688   256    
128    -64    
304    48     
-112   128    
176    1088   
-592   80     
240    -256   
368    96     
0      80     
192    -16    
-96    128    
224    48     
192    352    
384    -80    
-352   -224   
192    -272   
-400   336    
208    32     
-192   32     
400    112    
64     128    
-288   0      
160    208    
720    48     
0      144    
-368   48     
-688   -832   
400    2544   
688    208    
-2304  96     
448    -848   
1104   48     
-464   16     
-80    96     
-480   -16    
608    384    
-16    0      
-208   96     
48     -32    
-144   32     
208    112    
336    176    
-32    -16    
-416   240    
480    -16    
-576   -640   
-32    272    
192    -688   
176    192    
-496   -80    
-96    192    
448    -272   
-544   16     
192    -16    
-240   16     
0      -480   
336    -304   
-368   -576   
32     128    
-16    144    
80     -848   
-48    -256   
224    -2608  
-544   -176   
-384   -656   
448    -608   
-48    -464   
-128   -224   
16     -240   
160    -48    
-32    -240   
304    -336   
-64    -800   
160    144    
-272   416    
256    -432   
-16    -720   
-16    -992   
112    1328   
736    304    
-224   1184   
624    736    
-464   512    
336    2224   
800    1920   
-368   -480   
128    -656   
-192   144    
160    32     
0      16     
320    64     
-368   416    
80     -512   
256    -432   
-304   -1664  
96     48     
48     -1040  
272    -48    
272    -64    
-416   304    
240    -112   
-272   -272   
176    112    
-80    352    
256    16     
-160   -288   
32     160    
48     48     
-224   896    
752    -784   
-576   320    
-16    -1040  
288    64     
80     -64    
256    -80    
-208   112    
-160   288    
256    112    
112    -128   
-16    112    
-176   -112   
256    0      
-16    -112   
256    -224   
-112   -656   
0      208    
48     -304   
48     304    
320    -48    
-144   80     
784    -32    
-528   320    
-96    240    
208    -64    
0      512    
96     -368   
80     -112   
32     -624   
160    400    
-128   -32    
112    -16    
-64    352    
256    160    
-400   128    
176    272    
-32    672    
-112   272    
64     -48    
256    -288   
-32    96     
-96    -272   
192    -320   
240    -208   
48     144    
144    -592   
512    80     
-464   464    
1648   688    
-2160  384    
-1088  -1696  
1888   -704   
-560   -896   
-416   -608   
160    -64    
672    -4048  
-128   784    
32     16     
-16    -160   
-160   176    
272    240    
64     -1088  
-384   -48    
208    -528   
240    304    
48     -48    
-304   -992   
-96    -720   
80     -448   
1008   832    
-64    -320   
-672   -336   
1184   64     
-576   432    
336    752    
288    1776   
1376   992    
-416   1680   
80     1120   
112    144    
144    -544   
352    -288   
-784   144    
80     -304   
48     112    
0      736    
736    32     
144    352    
-560   464    
128    96     
544    64     
-48    -512   
-368   384    
224    -304   
864    -704   
-416   -320   
240    -192   
-448   208    
160    64     
416    256    
-224   -64    
-464   -144   
208    -1008  
-336   160    
256    -688   
-656   -112   
240    224    
224    -48    
-496   0      
336    32     
-80    -288   
384    160    
-224   64     
176    -144   
448    -32    
16     -256   
112    720    
-624   240    
-192   -2864  
-1168  -1120  
-160   -144   
592    256    
1120   80     
-896   160    
-112   -96    
-384   496    
816    -192   
-816   48     
272    -432   
-1312  -144   
128    -224   
368    -192   
-432   -176   
176    -80    
-112   -288   
16     96     
608    -512   
-1152  -1376  
240    -816   
128    -464   
-224   -80    
784    -16    
-736   -96    
-80    -48    
-16    -144   
-16    96     
-400   160    
128    -288   
-240   -240   
176    -800   
160    208    
16     -400   
336    288    
-336   112    
64     -80    
-208   0      
512    64     
-160   -32    
-272   32     
-16    -16    
96     -176   
-128   -176   
224    -496   
-384   384    
672    176    
-128   304    
-32    -608   
-368   -192   
96     -176   
288    496    
-1088  512    
400    -16    
-64    128    
384    -112   
-112   -16    
320    -48    
-48    64     
-48    48     
64     96     
48     -192   
-144   96     
160    -176   
-16    48     
-48    48     
48     -416   
-176   -336   
240    320    
-272   16     
128    -64    
112    -16    
-80    -96    
-32    96     
48     -80    
96     448    
-480   -400   
96     -304   
192    -32    
-1120  -64    
-592   -1008  
1088   -144   
-1232  704    
128    -144   
192    288    
-768   64     
64     -16    
928    -80    
-176   -160   
-1328  -176   
224    -208   
-80    -384   
128    144    
-240   176    
-16    384    
160    -160   
-336   -304   
48     368    
-992   -192   
-176   -96    
224    160    
-560   -672   
688    -288   
-48    240    
-800   -208   
496    272    
240    -320   
-320   480    
-352   240    
16     -176   
-192   64     
-16    -96    
-304   304    
-32    -80    
48     -64    
-432   -48    
-128   -304   
-128   -112   
256    -112   
-400   -32    
176    80     
-96    16     
-16    -16    
-160   0      
-192   -128   
-64    112    
464    80     
-48    80     
-144   -48    
-256   -64    
144    656    
-800   1152   
-224   240    
528    -80    
-48    -272   
176    -64    
-560   -16    
192    352    
96     560    
400    352    
32     -48    
-192   128    
32     32     
0      128    
-112   144    
576    80     
-544   128    
-224   96     
-112   32     
-320   -128   
112    -16    
-272   -544   
1216   848    
-640   192    
-64    -64    
800    48     
-752   -16    
0      48     
352    0      
544    -16    
-640   96     
-32    144    
-240   16     
-16    96     
112    -144   
304    160    
-288   96     
176    112    
112    288    
-240   48     
-32    -80    
-64    64     
208    672    
-960   -240   
32     352    
752    -176   
-624   -32    
272    -240   
112    0      
-432   160    
736    -16    
-48    224    
-480   64     
-80    32     
336    224    
256    384    
-16    256    
-176   400    
288    -192   
0      128    
176    -96    
-544   208    
-320   -416   
192    224    
496    224    
-480   272    
-256   128    
400    -192   
192    176    
32     592    
-640   -352   
64     2864   
1440   80     
-2240  -368   
-32    -96    
928    -128   
16     -192   
-1056  0      
544    352    
-368   224    
-128   112    
432    -144   
-16    16     
-256   -64    
16     96     
144    16     
-144   -32    
-96    -160   
48     48     
160    -256   
-736   -736   
560    -416   
-144   -336   
64     80     
-144   496    
560    32     
128    320    
-336   192    
64     -608   
-16    -848   
272    320    
-256   176    
0      -128   
-336   -192   
432    64     
32     416    
-240   272    
80     416    
16     272    
-208   -528   
304    128    
-48    688    
-224   -80    
-112   80     
32     496    
464    -608   
-288   -752   
-112   -224   
-32    32     
48     288    
64     -288   
-320   464    
-224   720    
1504   -592   
-720   80     
432    928    
112    -240   
-48    -880   
256    368    
-256   -64    
128    176    
112    -80    
-176   32     
176    -272   
-64    800    
-256   240    
128    -192   
-240   -64    
128    160    
304    -16    
-288   -128   
208    112    
-16    32     
160    -32    
80     160    
96     160    
32     16     
-208   -128   
-224   -224   
192    304    
-32    128    
-320   -272   
864    -560   
48     688    
176    -288   
-432   352    
-32    144    
208    176    
-304   480    
-112   352    
80     16     
128    -272   
48     240    
96     192    
-32    320    
32     -96    
96     -1008  
144    272    
-48    224    
-208   64     
-16    -32    
-240   -352   
992    -752   
-272   672    
176    -144   
-336   224    
96     176    
16     192    
208    -32    
-192   -48    
176    -112   
32     -784   
64     208    
256    176    
-160   112    
96     -32    
64     -176   
224    48     
-64    -192   
352    -464   
-32    784    
160    384    
-48    -96    
-32    80     
320    0      
64     112    
128    0      
32     32     
-304   -176   
656    176    
-352   464    
1408   528    
-2736  688    
64     32     
1168   -256   
-608   -592   
-768   -448   
-128   384    
80     -656   
384    608    
208    768    
-96    1072   
-240   448    
432    -928   
224    -32    
-96    -352   
-416   -32    
176    -128   
352    144    
-224   -352   
-208   288    
176    -112   
-704   -192   
1872   -448   
-880   -1184  
576    1632   
752    -112   
-576   -112   
1120   -112   
-960   656    
80     -864   
496    96     
32     -32    
-176   208    
-176   -368   
80     -176   
352    192    
-144   96     
-128   -48    
32     -80    
0      0      
272    -544   
-48    144    
-176   -752   
576    320    
-272   -240   
0      -80    
624    656    
-848   368    
-304   -336   
-112   288    
512    464    
-144   96     
-208   0      
-80    -416   
-160   -16    
192    -704   
640    -544   
16     144    
480    -176   
-656   -480   
-64    80     
80     -48    
240    160    
-16    112    
176    32     
0      48     
176    0      
48     96     
-176   -288   
-64    -592   
1440   272    
-1952  288    
336    448    
1552   -304   
80     -272   
-560   192    
-432   -288   
576    464    
32     -160   
368    32     
-288   -16    
144    -160   
64     -48    
16     112    
192    -80    
-96    272    
-96    -16    
112    16     
384    496    
-96    384    
-112   608    
480    -80    
-224   128    
-848   -32    
416    -816   
624    -1456  
-560   384    
448    -592   
-144   -176   
288    -2496  
-80    -160   
16     16     
272    -112   
-160   -96    
304    160    
144    -592   
-64    48     
512    -336   
-352   64     
480    -352   
-224   -16    
160    16     
448    -48    
-160   16     
304    -256   
-416   -32    
432    -448   
0      -48    
-288   80     
272    -256   
256    -624   
96     400    
16     -48    
-416   528    
1216   208    
-704   -176   
-1120  -16    
416    -336   
-32    16     
240    -16    
128    -48    
-80    -768   
-48    64     
144    -304   
32     -192   
16     -16    
16     352    
192    80     
-336   -624   
-288   -80    
288    16     
-576   -208   
400    0      
96     -96    
-32    64     
-160   -272   
240    -16    
128    480    
-320   192    
192    -96    
48     -208   
704    1872   
1488   -464   
-1600  416    
352    112    
224    -96    
-416   -704   
320    -416   
-368   608    
-752   256    
400    -496   
496    -176   
-512   80     
-160   -496   
320    512    
368    -144   
-208   -64    
160    -176   
-288   64     
64     -16    
288    -16    
-368   -1312  
48     112    
96     352    
-560   -176   
416    160    
64     16     
-400   -128   
176    -576   
176    384    
-80    -656   
112    144    
48     -64    
-320   384    
368    -32    
-240   -192   
-144   -64    
192    -304   
-384   -336   
400    -240   
-400   48     
16     -112   
-64    224    
256    -432   
-96    176    
48     -608   
-176   160    
368    -144   
-80    32     
-96    112    
-416   -176   
2464   144    
-2240  672    
-640   -272   
1200   -80    
-336   -304   
-192   -32    
624    -80    
112    -240   
-368   -192   
192    32     
96     -32    
0      80     
128    -64    
-304   176    
768    80     
-528   0      
176    -16    
-192   32     
384    288    
192    96     
-192   -576   
880    240    
-1424  -272   
1088   -240   
688    64     
-528   672    
-112   -128   
256    -128   
80     96     
-16    -128   
-528   112    
-176   -128   
656    -64    
-96    -224   
272    112    
-432   0      
176    48     
-208   -720   
-256   320    
80     128    
-320   256    
80     384    
-464   -320   
-304   -16    
-432   288    
464    -560   
1104   432    
-448   64     
80     208    
-112   64     
-496   -112   
144    256    
-32    176    
-16    256    
176    544    
-672   208    
-80    -448   
784    -192   
-240   160    
-1040  -48    
672    -32    
-192   176    
-208   -304   
352    -64    
-64    -48    
400    -288   
-32    224    
256    -160   
-240   -160   
-288   48     
-720   2224   
560    48     
-544   -64    
-752   -112   
960    432    
-112   272    
-1888  -1200  
240    224    
-96    464    
-192   624    
224    -128   
-336   224    
160    -160   
-96    -48    
128    -352   
80     -400   
-480   -80    
96     144    
128    416    
-16    0      
-16    -112   
-112   128    
-128   -336   
-192   320    
528    -176   
-96    912    
400    224    
-384   -272   
128    -432   
-16    -112   
32     -176   
-272   128    
160    848    
80     1232   
496    256    
-176   -448   
-224   -480   
-128   -288   
-592   1088   
224    16     
-128   0      
-128   -48    
64     672    
160    -144   
-496   -288   
240    336    
-272   -16    
192    752    
192    -80    
-320   -80    
384    1296   
-688   -336   
-464   0      
32     -128   
32     48     
208    832    
-288   1456   
16     -400   
-512   -752   
80     -672   
32     464    
128    -16    
-80    592    
192    512    
128    112    
144    16     
-32    -208   
-432   160    
-272   96     
-16    128    
-160   -16    
-16    128    
-48    144    
208    192    
-176   224    
240    -240   
176    -368   
-144   -176   
16     -48    
-112   176    
-64    -176   
432    -832   
-256   448    
384    -288   
-400   256    
-128   96     
-64    -16    
256    -48    
-400   -448   
16     64     
-16    336    
-32    256    
16     80     
96     -32    
-128   32     
128    0      
-176   272    
-32    368    
-16    -64    
208    0      
288    -256   
-1376  480    
832    0      
-176   512    
160    80     
176    192    
-176   384    
-592   272    
256    -432   
224    -48    
-240   480    
-400   64     
32     -336   
336    464    
16     -160   
-192   240    
-336   112    
464    176    
160    112    
-16    128    
-256   224    
-160   32     
272    -144   
96     192    
-128   160    
112    160    
-32    -64    
304    48     
-96    -48    
-96    -128   
-1440  416    
2080   -112   
-400   48     
-576   240    
768    -192   
-288   160    
320    384    
-448   272    
288    128    
-144   208    
544    224    
-320   64     
-128   0      
336    208    
224    144    
-48    112    
-192   208    
32     128    
-144   160    
224    208    
-96    112    
-720   -720   
976    -896   
-64    240    
96     -336   
-144   688    
640    144    
-480   -368   
80     0      
320    320    
-128   0      
352    144    
-96    112    
-336   32     
448    128    
-192   112    
208    32     
-16    96     
80     128    
-16    160    
224    80     
-192   -576   
-608   -288   
384    -304   
64     496    
192    480    
-208   592    
-1232  464    
-704   288    
1072   -480   
80     112    
-384   144    
-176   128    
272    224    
496    1120   
-288   48     
-560   -176   
656    -2016  
736    -128   
-64    80     
-528   176    
-16    176    
304    -80    
-144   112    
-144   64     
448    48     
-624   368    
256    -80    
160    80     
-688   864    
176    3392   
1168   -48    
-1696  48     
416    -304   
528    -832   
80     208    
-736   192    
592    112    
-176   -192   
-672   176    
208    0      
272    160    
112    -112   
0      128    
32     32     
-560   -176   
272    96     
304    -144   
-512   -480   
-464   -1312  
608    -224   
-400   160    
400    -16    
240    -32    
256    -80    
-176   128    
224    176    
-32    64     
208    112    
-224   -128   
-576   -208   
544    -64    
-272   -80    
144    -64    
304    0      
-16    -192   
-528   -336   
544    160    
-912   0      
496    208    
-64    -112   
-112   128    
-128   -80    
-80    32     
288    0      
64     0      
224    0      
-176   -96    
-64    224    
80     0      
160    224    
-240   -448   
480    48     
-240   144    
272    160    
464    112    
-112   -192   
-320   368    
192    384    
368    192    
-144   -64    
-80    192    
224    -176   
0      48     
-16    -64    
-112   0      
256    -272   
192    192    
-288   -400   
320    176    
-304   -224   
16     176    
224    208    
112    352    
32     368    
-368   -16    
496    0      
64     -160   
64     224    
-64    16     
1152   2992   
-2144  -1168  
-48    320    
1632   -368   
-992   176    
112    176    
128    160    
128    -592   
-160   -2048  
80     528    
160    -32    
-256   -64    
224    112    
-128   16     
240    -128   
64     672    
-16    -464   
-64    240    
272    160    
-128   224    
-352   -176   
1040   -144   
-272   -1088  
-528   -736   
576    -208   
-320   160    
528    544    
-288   464    
96     -16    
-240   -384   
96     0      
288    -304   
-16    304    
-208   -48    
-48    -1440  
432    -32    
-64    -128   
-16    -256   
48     -16    
80     -48    
16     -176   
272    -16    
32     -112   
-112   176    
-112   -272   
240    192    
208    -160   
-144   -192   
80     0      
0      -672   
1168   -304   
-2448  304    
1008   -64    
-304   -224   
-240   -512   
384    -384   
-512   -448   
224    -144   
0      -240   
48     256    
208    112    
-256   -80    
160    -96    
-320   -128   
352    -80    
-352   -224   
0      16     
48     -240   
-784   -144   
-208   -336   
112    48     
-416   -816   
1488   -496   
-464   -272   
128    -560   
240    -1536  
240    160    
-176   448    
-496   320    
64     -336   
480    320    
272    0      
-304   -64    
-688   -64    
448    -96    
96     -32    
-352   96     
0      -640   
-336   -368   
240    112    
80     -1552  
80     0      
-176   -288   
-224   -48    
16     -32    
-128   -784   
32     -240   
1024   1296   
560    1568   
-320   464    
80     -144   
-144   -144   
192    -208   
96     208    
-208   -96    
-400   -576   
960    -272   
128    576    
528    -48    
-64    160    
-112   272    
-128   -64    
208    -208   
96     -224   
48     32     
-96    176    
-880   624    
-896   0      
304    -96    
384    16     
16     -96    
-1168  1392   
928    -1296  
112    -784   
-928   608    
1616   400    
-224   -384   
-384   272    
-320   -112   
400    -1072  
384    880    
-48    -208   
-432   48     
-112   96     
368    288    
-32    -464   
128    -80    
-16    -144   
304    336    
432    880    
-272   288    
-128   -784   
112    16     
-48    240    
256    368    
-288   1248   
272    432    
784    320    
-288   976    
-112   -240   
288    96     
144    256    
128    -544   
-80    192    
-368   208    
-160   480    
192    288    
256    -32    
-704   -560   
128    272    
208    32     
16     -400   
96     -208   
-192   304    
-16    -480   
0      -192   
64     416    
-624   -1056  
-176   224    
208    288    
240    384    
192    1040   
-560   256    
-320   592    
656    288    
-224   304    
-208   -48    
-224   -80    
-192   128    
112    432    
-192   0      
-160   16     
-208   96     
64     -80    
416    0      
-384   -176   
112    -304   
-1072  -128   
-240   -64    
576    -128   
-176   240    
-464   -80    
-16    160    
160    -272   
-144   288    
-176   544    
-240   416    
96     688    
-176   800    
-112   320    
48     80     
320    656    
-1728  800    
656    -752   
224    -848   
32     -560   
48     -560   
-416   -272   
96     272    
48     928    
0      -288   
-96    -224   
-80    -160   
48     448    
176    -96    
-32    -144   
-112   192    
-192   144    
96     368    
-384   -80    
-160   48     
320    320    
-816   352    
688    -1184  
128    592    
-208   624    
-448   -592   
368    64     
48     32     
32     320    
-128   512    
-48    -192   
-32    -64    
-64    256    
-128   0      
-32    384    
-1104  -160   
-96    -144   
208    -176   
144    112    
-80    256    
64     144    
-64    32     
-224   -144   
112    -128   
-112   -384   
-160   -192   
96     -64    
-128   48     
-272   -80    
608    240    
-2112  1616   
1760   608    
-448   0      
-144   -384   
880    240    
-576   -240   
-432   -176   
448    48     
-128   -64    
64     256    
-64    16     
48     128    
-256   -160   
256    272    
352    64     
-608   208    
240    -48    
-16    -192   
-144   -288   
-128   176    
112    32     
144    352    
-1808  576    
816    0      
-64    -160   
-752   0      
704    64     
-384   -96    
288    336    
192    64     
-96    -144   
0      144    
-112   176    
-80    -48    
-304   64     
432    48     
0      0      
64     -224   
-304   480    
-208   144    
-96    208    
320    592    
-768   -464   
-288   208    
336    160    
-448   -896   
368    -576   
304    -80    
-32    -400   
-560   224    
880    480    
-32    208    
-304   144    
272    128    
-304   -672   
32     -416   
-416   -384   
112    -256   
400    -224   
-176   -16    
-768   -32    
192    192    
384    -48    
32     176    
-672   -288   
224    224    
384    320    
16     -112   
-176   112    
480    -1104  
-2624  -2608  
-80    272    
32     560    
-448   400    
656    80     
-208   96     
-512   96     
-80    48     
528    160    
272    -64    
16     192    
-192   32     
0      112    
144    32     
80     112    
-240   -32    
-176   176    
128    -16    
-144   -80    
896    -736   
-816   192    
832    80     
-688   128    
528    80     
-112   32     
-512   48     
1040   -384   
-544   16     
160    -96    
-32    192    
192    80     
48     192    
16     160    
-304   0      
656    48     
-432   -160   
208    0      
448    32     
-128   64     
176    240    
-80    144    
384    208    
-80    -80    
240    80     
112    592    
-448   272    
240    48     
64     -96    
-432   -80    
192    112    
-352   -96    
368    48     
-864   256    
624    -304   
-288   -176   
-368   32     
304    160    
-224   -144   
336    -192   
-32    0      
0      -32    
-80    -64    
-80    112    
80     -192   
-112   -800   
80     16     
-96    -32    
32     432    
160    720    
-192   704    
160    240    
96     -128   
160    -192   
32     336    
-48    -128   
-96    176    
240    512    
-192   1072   
400    384    
-64    -384   
-496   -1248  
1280   -768   
-1040  592    
928    560    
-672   224    
-240   -32    
448    448    
432    384    
-160   144    
-592   320    
304    144    
272    96     
112    48     
-192   96     
0      -288   
80     -48    
-48    -1088  
176    96     
-112   240    
-32    32     
192    112    
-32    1296   
-96    32     
-48    -320   
112    -320   
96     -224   
-96    0      
-48    -512   
64     -336   
32     -368   
112    -16    
96     -944   
32     224    
-176   160    
208    32     
192    96     
-112   368    
32     -112   
240    -208   
-80    -464   
-176   -192   
64     320    
176    -48    
-128   -80    
80     -64    
-32    48     
160    -640   
-80    384    
32     -1136  
-128   -128   
368    -272   
1120   0      
-2272  -144   
976    48     
848    -96    
-576   64     
976    768    
-384   -880   
-96    -672   
192    -288   
-64    272    
48     -240   
-208   112    
352    -160   
-32    400    
-368   336    
544    208    
64     160    
-256   48     
272    -400   
0      -592   
-288   -784   
-736   528    
2096   -272   
-1024  -976   
-304   -80    
672    -1120  
-240   -848   
-176   -832   
160    -80    
208    -272   
-176   48     
64     -32    
48     304    
64     -192   
16     -256   
176    208    
-208   -1328  
160    -448   
272    -912   
-80    -240   
-176   -176   
32     112    
80     720    
-16    1088   
-208   1536   
-32    848    
336    1200   
-192   992    
0      848    
704    -736   
-528   112    
112    352    
448    928    
-320   -656   
-480   320    
64     -288   
48     1168   
976    512    
-352   336    
448    272    
-160   608    
-208   48     
16     -2816  
288    -736   
16     -144   
416    -448   
-240   -96    
16     656    
576    384    
80     0      
-1264  -896   
-512   848    
976    592    
-1392  -304   
832    -768   
304    -1664  
-112   1312   
-560   592    
528    -992   
784    -176   
-144   528    
48     304    
-208   0      
64     -320   
432    -304   
80     -320   
0      -96    
128    144    
112    400    
-80    144    
96     -192   
192    224    
-496   -496   
-576   64     
144    -336   
-16    -96    
160    -512   
-432   -1744  
-144   -352   
288    368    
-32    80     
96     -192   
288    -224   
-352   256    
-160   48     
176    -384   
-80    -608   
-464   -240   
320    848    
-400   560    
-64    -32    
144    -416   
-256   -368   
64     -384   
496    -112   
-64    720    
320    -608   
288    480    
-80    -304   
0      -112   
624    976    
-976   608    
-64    -304   
832    -576   
-832   -496   
-64    512    
656    592    
48     -464   
-432   -1136  
80     -848   
-64    -176   
128    -1264  
96     112    
-272   -80    
128    -16    
112    -112   
-80    16     
112    144    
224    -96    
-176   -32    
160    -176   
-560   -144   
48     -464   
-224   -80    
48     -480   
96     48     
-48    448    
16     0      
48     -592   
-64    -32    
64     1904   
1152   -224   
-1408  256    
1200   -1184  
-448   400    
192    -240   
-240   -464   
256    368    
-1200  688    
96     432    
368    128    
-192   128    
0      -96    
128    -1200  
192    0      
64     368    
288    624    
-336   640    
-64    96     
272    16     
160    -784   
-432   528    
352    -208   
-512   432    
544    16     
-272   288    
240    -608   
-96    -288   
-16    -864   
336    -320   
-272   224    
-112   240    
-128   -16    
96     -112   
-208   -96    
272    -144   
-304   176    
176    -80    
-208   320    
464    -448   
-432   112    
96     -240   
-16    64     
304    -32    
96     176    
-848   64     
256    160    
144    -96    
-288   -48    
-192   192    
2176   -128   
-2528  1248   
240    -320   
992    -32    
-656   -224   
-656   208    
1008   560    
-176   432    
-624   16     
224    -32    
-32    0      
-192   0      
-16    160    
-288   32     
128    208    
208    -80    
-272   -80    
-112   -112   
448    192    
16     -80    
-352   -288   
1056   592    
608    48     
-1248  -112   
-272   -208   
640    144    
-896   -256   
-16    -144   
-176   16     
-544   112    
-16    -96    
-16    0      
-160   -80    
-192   -272   
80     16     
272    176    
-736   -768   
368    -208   
-64    -96    
-320   128    
144    80     
176    128    
-1056  160    
1104   -80    
-624   -176   
64     -144   
-160   -80    
0      176    
240    16     
64     224    
-368   144    
-16    -336   
336    -256   
64     144    
-96    -176   
32     912    
16     -400   
96     -1120  
-272   112    
96     448    
-320   -176   
-16    48     
192    -32    
64     96     
272    608    
-640   80     
-224   144    
784    48     
16     96     
-1856  0      
3232   -2144  
-1024  624    
-144   96     
960    256    
-880   96     
-560   -336   
1216   288    
-848   -576   
-1168  96     
80     -16    
304    192    
400    16     
-400   48     
-256   0      
-160   96     
576    80     
-32    32     
-80    112    
-432   -560   
-304   -208   
288    -256   
-336   208    
224    -96    
-160   -64    
-80    16     
144    -96    
-320   80     
368    -48    
-720   -16    
416    -96    
16     224    
0      128    
-544   -16    
320    288    
64     336    
-32    400    
-416   112    
-736   112    
-16    -48    
80     -304   
-32    -32    
-112   -96    
-176   352    
208    352    
-80    192    
-96    16     
-208   -240   
208    16     
-64    -16    
-160   144    
48     160    
272    528    
368    -80    
-320   912    
624    704    
-240   336    
-128   -112   
128    -176   
-96    -208   
-448   16     
64     -32    
-48    -16    
128    144    
128    0      
32     160    
-112   96     
-224   272    
48     -112   
-48    64     
16     96     
-160   272    
496    1104   
64     672    
-464   464    
-48    -48    
0      304    
560    -272   
-288   -624   
-112   144    
-48    464    
912    1168   
-1680  1344   
944    -608   
272    784    
-384   320    
-160   16     
-48    80     
256    816    
-128   -112   
160    304    
48     400    
-176   -240   
112    112    
-96    -224   
-144   48     
32     176    
144    400    
-96    -112   
112    -16    
64     112    
256    848    
-512   -96    
240    -144   
768    304    
-224   -160   
-352   96     
-32    928    
544    -768   
-160   -240   
32     80     
0      256    
160    176    
32     -112   
144    128    
-288   -32    
-16    272    
288    -64    
-80    384    
-192   640    
-272   -208   
432    -304   
80     64     
-112   -80    
-144   192    
368    -64    
-320   -272   
272    -288   
-64    160    
-192   48     
80     48     
1408   -32    
-3136  -96    
-640   -64    
1952   720    
-752   672    
-304   736    
288    -240   
-288   -176   
0      672    
336    -288   
-48    496    
-368   192    
176    176    
80     -32    
-256   352    
-16    16     
176    -32    
-48    160    
-144   48     
336    64     
-288   -64    
816    1120   
272    192    
-432   -816   
224    -496   
-528   240    
448    160    
336    704    
-208   1296   
336    192    
-48    -1040  
-160   -432   
176    256    
288    576    
-80    400    
432    560    
-32    -48    
-48    144    
224    16     
-192   48     
352    224    
96     -80    
-288   1056   
704    48     
384    768    
-368   1312   
80     576    
-768   -144   
720    -304   
352    720    
-304   544    
592    96     
288    -48    
160    48     
-880   416    
992    -304   
208    272    
224    1264   
352    -1152  
-336   416    
480    288    
96     112    
256    352    
-192   400    
32     80     
336    -112   
-464   192    
-320   -528   
-240   -560   
176    -320   
-224   -128   
1104   -1264  
368    -160   
528    368    
-992   432    
-464   48     
736    -256   
-80    -624   
-48    400    
-128   640    
160    -16    
432    -96    
48     272    
-448   208    
-32    224    
64     -224   
96     -352   
-96    208    
-224   352    
208    1152   
240    -704   
256    320    
-288   -176   
-544   256    
416    -368   
16     512    
176    16     
64     -384   
-320   32     
288    -128   
-64    -432   
96     -496   
368    -128   
-128   -640   
272    -624   
-112   -256   
160    528    
128    -384   
-336   -432   
-112   -320   
96     176    
-48    96     
-32    -48    
112    32     
192    16     
-96    -656   
208    -496   
-16    16     
48     -1056  
-352   -768   
208    -672   
592    480    
-1328  -16    
544    -80    
560    -96    
-320   -176   
368    576    
-304   128    
192    752    
32     80     
64     352    
192    -64    
-272   96     
224    224    
272    384    
-96    -560   
80     -368   
128    -96    
304    64     
96     448    
128    -112   
-512   144    
368    -96    
192    320    
-176   -272   
-160   -32    
320    -400   
-80    16     
32     -16    
-48    224    
-320   -448   
1056   848    
-304   784    
-240   -832   
-448   272    
288    -864   
224    -1568  
144    -240   
144    -48    
-672   -144   
352    -656   
432    -96    
-192   64     
-112   16     
32     496    
288    -304   
-64    -1072  
-176   336    
512    224    
-656   304    
-240   -112   
128    -1552  
-64    128    
352    -688   
-624   80     
352    -928   
-48    -432   
208    -592   
-128   32     
80     48     
96     112    
240    -352   
-144   64     
-224   -112   
160    32     
16     -48    
-160   -160   
-912   -176   
144    -128   
-16    80     
384    -272   
-288   -64    
96     -816   
0      -32    
240    0      
-464   -160   
432    0      
16     -96    
-272   -128   
400    -80    
240    832    
-16    1072   
-800   928    
864    -448   
-320   -336   
128    -64    
-320   -48    
144    -336   
-112   -96    
160    -2512  
-160   -16    
256    208    
16     -64    
-352   48     
512    -64    
-128   -112   
-160   -112   
-320   -32    
96     -112   
96     -224   
96     -80    
-16    96     
208    208    
1392   -320   
-1520  -416   
1216   656    
1056   -112   
-1264  16     
976    32     
-240   224    
-304   -64    
48     16     
-48    96     
32     -64    
-160   0      
240    64     
64     -80    
-112   -192   
64     16     
192    -608   
-336   128    
-80    -272   
560    784    
-1520  -16    
336    48     
224    -272   
-592   -112   
720    336    
480    784    
-576   -176   
-64    -352   
-336   32     
-32    240    
-16    288    
0      -240   
-544   -256   
560    -576   
16     128    
-224   176    
416    240    
-576   112    
544    -96    
-848   0      
-32    -128   
128    -48    
128    128    
-672   -112   
-192   -160   
256    48     
-240   -464   
-464   -2704  
1264   -1936  
160    368    
-2144  -80    
800    256    
272    -256   
32     -32    
-336   176    
-96    -112   
-192   -96    
-400   112    
624    0      
-144   -304   
0      288    
-32    -224   
160    336    
-288   128    
176    -32    
80     -32    
208    -512   
-992   -1184  
464    -736   
-96    -288   
256    48     
736    176    
-960   -64    
496    304    
-336   -144   
-32    16     
256    304    
-336   288    
240    320    
-256   144    
-224   -48    
-160   32     
-64    80     
352    64     
-864   -480   
240    -448   
-64    -48    
-80    -96    
-80    128    
-192   752    
608    272    
-496   -272   
-128   -96    
272    -416   
-496   -288   
160    0      
-240   96     
80     -64    
-224   0      
-64    1008   
848    -480   
-592   -256   
240    -384   
-368   -784   
-352   -1120  
288    -368   
-224   -752   
-288   -736   
160    256    
-192   288    
32     384    
-48    -80    
-48    -96    
-400   416    
-80    80     
-320   -64    
112    144    
112    384    
-48    208    
0      -736   
-48    -64    
-144   -288   
176    -112   
-160   96     
-32    400    
272    208    
-288   -192   
-80    -32    
-208   144    
352    1280   
-512   576    
-144   -48    
-480   96     
96     0      
0      -368   
80     80     
48     144    
192    -32    
16     -112   
-80    16     
-48    96     
-80    32     
-16    -112   
96     -96    
224    176    
-208   -64    
-144   96     
-400   128    
-160   -160   
928    -832   
-352   592    
-320   48     
96     -64    
-16    -48    
112    -384   
96     -32    
-64    -128   
-160   224    
64     48     
208    80     
-32    -192   
240    288    
-1024  48     
0      160    
288    -224   
-96    64     
-16    -176   
112    -224   
160    -96    
416    -80    
0      224    
-144   48     
48     288    
0      80     
-80    64     
128    48     
-80    144    
-416   -80    
1520   1664   
-1136  944    
-1504  -480   
2048   -144   
-528   -688   
-1280  -784   
624    16     
-768   -1472  
-144   -1376  
544    400    
0      912    
-368   16     
112    -192   
80     64     
-480   -304   
64     32     
128    496    
-144   720    
-112   16     
256    256    
-112   96     
-432   736    
2320   0      
-1376  400    
432    -256   
0      -96    
-224   864    
288    -176   
-80    -656   
-496   -1328  
288    32     
-64    -96    
80     256    
-160   208    
-32    304    
96     64     
-240   288    
208    336    
-448   144    
208    416    
368    96     
0      16     
-144   -208   
-80    1088   
416    240    
-496   -768   
112    -464   
-528   464    
896    -496   
32     -128   
-624   -336   
624    336    
-48    -48    
176    144    
288    1120   
-672   48     
-64    304    
144    960    
160    -48    
272    896    
-704   608    
176    32     
688    224    
-656   224    
-272   64     
-416   -336   
720    -160   
112    240    
-1104  -64    
400    -128   
1696   2032   
-1952  656    
256    -144   
1664   -336   
-352   160    
-464   -352   
-16    -144   
416    336    
256    0      
-240   464    
144    128    
112    16     
384    432    
-144   176    
-336   48     
128    0      
208    -32    
-448   96     
176    -864   
-576   -1312  
272    -336   
96     112    
-144   144    
-176   176    
592    160    
-624   224    
160    -512   
-176   -352   
-80    -256   
112    320    
0      -48    
48     32     
-48    240    
112    336    
240    240    
368    608    
-704   80     
336    32     
320    256    
-272   256    
16     32     
-448   -288   
640    -128   
368    0      
-352   208    
112    400    
-64    272    
-64    224    
256    -1024  
-192   208    
-144   144    
-160   -896   
-144   -160   
496    704    
-416   64     
0      160    
560    -48    
-400   0      
48     512    
-192   208    
96     80     
112    144    
-176   -48    
208    -112   
-64    128    
-80    64     
256    -208   
-128   224    
-224   -256   
368    -224   
48     544    
-96    -80    
-16    -240   
-16    16     
16     272    
-48    96     
-176   -384   
96     128    
176    -160   
-160   80     
-400   -1056  
928    -1600  
-1440  912    
1168   -304   
-368   96     
-528   112    
0      -672   
832    0      
-208   -208   
-496   288    
224    48     
80     -96    
240    208    
-208   -656   
48     -224   
96     400    
-64    -192   
160    64     
176    224    
-208   -480   
-16    208    
704    1072   
464    96     
-992   -256   
464    320    
0      -96    
-32    48     
256    80     
144    16     
-320   -48    
-96    -400   
400    96     
448    -32    
-464   144    
-176   -80    
304    128    
192    -80    
96     0      
-32    272    
96     -32    
-48    112    
224    -48    
-64    144    
48     32     
-32    192    
544    -1184  
-464   128    
144    -96    
-16    192    
192    128    
-1104  -1728  
-400   -1104  
2864   464    
-1072  448    
528    528    
-48    -176   
-80    -400   
48     48     
-704   -1248  
720    -128   
64     -288   
-96    -48    
-240   -96    
224    -144   
-304   -48    
608    48     
-448   96     
64     -96    
128    -80    
-112   -384   
64     128    
304    272    
-1312  704    
768    -160   
-256   832    
1120   -400   
-384   624    
576    -528   
-368   288    
32     -96    
480    32     
-240   80     
32     128    
80     -48    
128    -416   
-160   -352   
208    -112   
-144   16     
240    48     
240    -48    
-64    32     
64     16     
-48    240    
1136   -720   
-672   208    
320    -64    
-128   32     
176    256    
96     -288   
-608   -224   
-128   -1456  
416    -64    
176    -912   
256    -144   
64     -368   
-672   160    
496    16     
-368   -32    
80     -304   
48     48     
-208   -208   
80     96     
-208   -16    
-16    -48    
192    -32    
-96    0      
640    -48    
-176   64     
-64    -32    
512    -544   
704    1024   
-2496  320    
1280   -112   
1312   -352   
-1168  160    
-208   896    
160    -64    
-48    80     
144    -96    
-464   -16    
208    -304   
-240   32     
640    -432   
-176   400    
128    -1376  
32     464    
304    -16    
-224   160    
256    -592   
-320   -1120  
208    -448   
-64    -80    
80     240    
-352   -176   
48     -208   
-144   -208   
160    48     
32     -96    
-48    560    
240    512    
-480   -112   
176    -4368  
32     -96    
128    304    
-256   240    
-112   80     
224    -560   
-208   -336   
-288   -304   
-176   -48    
0      208    
-896   320    
96     112    
96     416    
-144   640    
176    912    
448    -64    
-400   1152   
384    272    
-96    -352   
144    0      
720    640    
-1360  336    
560    -32    
-240   432    
-160   32     
192    240    
-80    848    
80     -1808  
-144   -240   
368    848    
32     -592   
-112   192    
208    112    
-144   -48    
-16    -144   
96     -304   
128    -16    
-112   256    
80     -192   
112    0      
-32    -32    
32     -80    
-192   -64    
32     -224   
64     32     
208    288    
224    160    
-528   64     
224    -256   
48     -80    
320    528    
-672   400    
160    -400   
400    -144   
16     80     
-192   -128   
160    176    
-112   -32    
352    -448   
416    -208   
-352   -16    
-16    -32    
112    -352   
96     -48    
176    16     
-192   -112   
-224   -352   
336    -64    
224    144    
-32    -16    
-544   -400   
256    128    
-496   64     
-80    48     
512    128    
-144   -560   
304    160    
-272   -80    
-160   288    
-112   176    
-32    32     
-176   -64    
0      -240   
-128   80     
-192   112    
208    144    
160    -80    
-160   848    
-1088  96     
256    0      
80     -208   
-400   80     
-240   208    
48     32     
-224   64     
-704   0      
-16    -80    
-32    -144   
256    192    
240    272    
-768   1824   
2656   -464   
-976   32     
-304   -64    
304    112    
-288   752    
-320   576    
16     -1168  
-512   -688   
112    416    
-128   224    
-144   160    
-48    112    
160    480    
48     -224   
-96    -224   
-32    -80    
160    -656   
-32    -768   
16     64     
656    944    
-2080  -320   
64     752    
576    -832   
-704   -1408  
352    -608   
-16    720    
-496   480    
-240   512    
-416   -912   
-96    -96    
-96    0      
-336   304    
512    -144   
-128   -176   
-688   176    
432    96     
-176   576    
768    192    
-80    32     
-416   16     
-96    -112   
-384   240    
-832   -2592  
-352   -1328  
1200   496    
-768   368    
-240   816    
880    -624   
-544   -80    
-112   272    
128    304    
80     0      
-16    -144   
-160   112    
-1120  688    
336    112    
-448   -80    
-112   -32    
-64    672    
560    -256   
-528   16     
-16    -96    
160    240    
288    224    
-128   -400   
-528   112    
512    64     
480    912    
-880   1312   
-1264  400    
80     64     
-512   -112   
-128   -48    
832    160    
-224   352    
-1312  512    
800    128    
-256   304    
192    -192   
-112   160    
-288   -288   
288    352    
-112   -96    
-112   272    
176    -32    
-144   96     
320    -64    
-432   -800   
-560   -656   
352    160    
-384   128    
656    352    
352    -48    
-848   32     
432    128    
64     48     
-96    -80    
128    288    
32     -16    
-320   192    
560    160    
-608   -80    
80     352    
272    160    
144    160    
-736   -512   
80     -224   
-96    112    
112    160    
-208   96     
240    96     
-160   -48    
160    16     
176    0      
-304   -224   
32     -80    
-64    -80    
112    96     
-80    112    
-80    160    
-528   -1216  
-448   112    
704    384    
-240   112    
48     80     
304    64     
-48    128    
16     400    
-240   256    
192    144    
-112   80     
-96    -16    
256    16     
-336   32     
80     128    
-16    -192   
48     -96    
-192   144    
288    32     
-96    336    
0      0      
-16    -64    
48     -64    
0      240    
112    288    
128    -432   
-80    176    
112    256    
-192   -160   
352    1600   
-656   -1360  
-1248  496    
1728   -528   
-256   -304   
-528   336    
-48    32     
304    96     
272    -816   
-336   464    
-80    160    
-48    -80    
96     176    
112    176    
-448   -48    
336    176    
-224   224    
64     -400   
16     128    
-32    336    
-320   -352   
896    -496   
-320   400    
144    -48    
-208   96     
-368   -112   
656    -176   
-48    432    
0      -48    
-80    -16    
-160   16     
208    -32    
176    256    
-80    272    
-112   0      
-208   240    
304    96     
384    288    
-416   -96    
-144   144    
224    0      
256    144    
-64    0      
64     176    
-48    208    
176    400    
-224   192    
368    -64    
-304   160    
176    240    
-592   -1840  
-1008  -544   
1040   -368   
-1024  -144   
-352   16     
1248   224    
-272   208    
-272   -336   
-400   -304   
224    -160   
208    -400   
-16    32     
0      128    
-144   -112   
416    64     
-288   -96    
176    144    
-112   336    
304    624    
-240   480    
-64    48     
400    -208   
-1568  512    
1264   160    
-176   704    
496    -512   
-16    240    
-496   320    
32     -80    
80     96     
192    0      
0      128    
-160   176    
-48    160    
464    64     
-640   -16    
192    48     
48     112    
64     384    
-32    64     
-256   -560   
160    16     
-272   -336   
304    -208   
0      -160   
560    -240   
-512   576    
176    32     
-128   -128   
-192   176    
-176   48     
368    -560   
704    -512   
-960   64     
368    272    
464    -928   
-656   416    
80     -496   
32     112    
128    -48    
-80    208    
-144   -112   
128    144    
112    16     
0      288    
480    416    
-848   384    
32     64     
288    -48    
-144   -976   
-768   -1472  
1488   -2800  
720    320    
-224   -208   
-944   336    
208    -560   
-288   -1392  
544    224    
304    -16    
-512   192    
48     -320   
400    -208   
48     384    
-160   288    
-352   160    
320    -320   
176    400    
240    -672   
-144   112    
96     272    
80     480    
176    48     
144    -16    
-512   -16    
160    96     
-208   272    
320    -240   
-144   1168   
48     400    
-48    0      
-48    -512   
32     -112   
224    208    
-112   192    
128    560    
32     864    
176    96     
128    704    
144    1136   
-48    -496   
176    -64    
256    144    
-112   304    
64     -96    
176    320    
192    592    
96     1488   
544    -320   
-112   -464   
-128   -352   
208    256    
464    960    
-656   -576   
-528   -144   
1008   -1248  
-256   -1456  
-128   -64    
256    -1056  
-272   -240   
272    -832   
240    -368   
-144   384    
-144   48     
-64    -144   
208    -304   
192    -560   
-320   240    
112    224    
400    -112   
-304   16     
80     -48    
-240   64     
-32    -288   
128    -80    
0      0      
-112   -80    
80     32     
-240   -576   
112    -992   
256    16     
-80    -368   
64     416    
-112   -128   
368    -224   
-32    96     
-208   -368   
-64    -80    
128    -96    
240    0      
160    -576   
352    -464   
-144   -2000  
16     -64    
176    -128   
-160   48     
96     48     
48     32     
-96    48     
128    -80    
-80    -16    
0      -64    
-928   -592   
-144   -256   
32     96     
-144   -240   
432    -352   
-176   -800   
-176   -112   
64     -256   
-16    -272   
128    32     
128    96     
-176   -160   
144    -144   
-224   16     
80     -208   
96     -160   
160    464    
-224   704    
0      272    
576    -176   
-128   -336   
-368   0      
96     -864   
176    208    
-80    -336   
80     16     
-96    96     
-400   -240   
192    304    
-128   -256   
608    -336   
656    -272   
-496   -736   
304    -144   
576    80     
-624   -64    
608    368    
496    -624   
-528   -80    
32     64     
272    80     
-80    96     
-48    -144   
-288   -176   
256    -288   
-112   -64    
-32    64     
-496   416    
80     336    
32     16     
496    480    
-1808  192    
160    -880   
544    -288   
-400   -1088  
64     -128   
0      256    
-64    16     
16     -48    
80     448    
672    -16    
-464   48     
-336   -80    
272    -304   
432    128    
-80    -128   
-224   -128   
240    192    
384    288    
-112   -1408  
-16    32     
-112   -272   
816    -192   
-768   304    
480    -48    
224    944    
352    16     
368    704    
32     496    
-336   112    
160    -144   
-304   -384   
80     -336   
224    368    
-464   16     
336    0      
-368   224    
256    -192   
-336   80     
112    -128   
-32    -16    
-128   32     
-208   -96    
-112   32     
352    64     
-496   -112   
-192   16     
-320   -96    
112    -336   
128    -976   
1568   -976   
-448   368    
-800   -64    
-288   16     
496    0      
-336   304    
448    0      
-256   -80    
304    -352   
-64    224    
-336   -144   
144    112    
32     -32    
-336   -160   
464    96     
-496   0      
-48    48     
-864   -256   
944    -304   
-240   -112   
208    160    
0      224    
-768   -16    
96     -80    
880    128    
-272   64     
-624   288    
368    -80    
368    48     
-672   -240   
0      -64    
-128   16     
0      144    
112    240    
-688   176    
-16    64     
432    96     
-176   -128   
176    -32    
-224   -16    
192    -144   
320    48     
-224   -48    
16     -32    
0      32     
304    -64    
-240   -16    
-144   96     
32     32     
0      -96    
96     -96    
-160   192    
608    -384   
-80    -320   
16     -256   
176    -288   
432    160    
48     448    
-544   176    
304    240    
112    0      
-144   160    
-96    0      
-96    112    
-16    -96    
32     64     
-624   160    
496    128    
-80    -64    
-176   176    
48     -112   
64     -128   
-336   64     
112    112    
16     320    
32     -1104  
-256   -496   
-64    640    
-96    -256   
80     -192   
-1008  176    
1392   -1136  
-688   -48    
-640   -592   
1040   352    
-480   -16    
-16    32     
-176   -16    
368    -192   
-16    -128   
-32    320    
-160   0      
-32    -48    
112    240    
144    -240   
-192   320    
-112   -80    
192    -192   
-144   160    
-32    224    
608    784    
-1376  432    
736    -336   
208    -192   
-288   0      
112    208    
-352   64     
48     -464   
160    -80    
-32    176    
-384   208    
-32    240    
112    -32    
-144   32     
-272   96     
-96    -16    
176    0      
128    32     
16     192    
32     160    
-144   64     
208    -16    
-480   -48    
320    80     
-320   -32    
-224   224    
400    -176   
-272   160    
-112   192    
-816   -1664  
2480   -224   
-1136  144    
-240   192    
816    400    
-1440  -288   
640    -336   
208    32     
-336   48     
-32    16     
-32    96     
320    176    
-368   32     
16     96     
64     -448   
-224   -80    
144    -32    
-144   -240   
-192   -16    
320    0      
-32    96     
-336   -608   
1136   720    
-976   352    
-16    -960   
32     -112   
144    432    
-192   -80    
208    96     
-192   192    
-192   32     
-48    112    
48     96     
208    64     
-48    176    
-176   48     
80     0      
192    160    
-144   224    
0      368    
112    -16    
-32    80     
48     16     
-272   64     
-544   -48    
272    672    
-128   416    
-400   -640   
496    80     
528    224    
-720   -768   
-112   80     
176    -128   
-272   -192   
-240   -224   
624    288    
-656   224    
32     -416   
480    48     
0      48     
-144   48     
-80    176    
48     128    
240    64     
48     64     
-480   -304   
672    -512   
176    80     
464    320    
-320   1328   
-192   256    
-224   -1472  
-752   144    
-944   -224   
-160   352    
944    -16    
-720   64     
-272   304    
320    -288   
64     -192   
-48    224    
-96    48     
-144   80     
-16    -384   
272    240    
-224   -224   
-336   -832   
256    240    
224    64     
-208   288    
-96    -256   
64     176    
112    176    
208    -48    
96     -288   
-208   -832   
-80    -464   
272    -288   
-96    -160   
256    -16    
-304   -448   
96     256    
-160   0      
-48    -560   
288    224    
-288   0      
0      352    
96     -1040  
-48    144    
160    1440   
-96    528    
112    48     
80     -128   
-96    -48    
-208   -80    
64     240    
656    304    
-288   448    
-80    -272   
-16    -240   
240    240    
-320   176    
576    624    
528    1168   
-112   1024   
-208   160    
96     -1616  
-224   -912   
160    -1968  
96     -256   
-144   1040   
-320   -352   
-128   -144   
416    -256   
-48    -224   
-64    -656   
-160   -48    
384    192    
0      400    
48     128    
160    80     
-112   80     
208    -128   
80     -96    
16     112    
-16    240    
48     672    
336    608    
-112   224    
-304   496    
128    -16    
128    -512   
608    -1456  
-464   768    
400    -976   
336    -352   
192    192    
-528   -288   
368    -704   
496    80     
-48    816    
-240   224    
-96    304    
32     -176   
304    112    
112    -80    
-128   160    
64     -1072  
224    224    
176    96     
-16    208    
352    272    
-544   1456   
256    -256   
416    -160   
-192   304    
-128   -160   
64     832    
144    -816   
128    -48    
0      -560   
-112   272    
128    112    
32     -464   
0      -448   
0      624    
-48    -32    
144    256    
112    -128   
-160   -624   
-64    256    
176    -96    
64     -128   
32     -160   
-176   256    
304    224    
-192   128    
-64    -16    
160    128    
-16    64     
224    896    
-384   -1136  
-768   -640   
624    288    
-608   -304   
896    64     
80     -448   
-672   176    
592    80     
-128   560    
352    -240   
-224   224    
64     -32    
144    192    
192    -272   
-624   -464   
416    -288   
-480   208    
16     -16    
-32    16     
32     -32    
-48    -192   
64     -992   
-752   496    
992    96     
-704   -240   
224    -1056  
656    -96    
-432   144    
-336   32     
128    -112   
320    48     
16     96     
-144   -576   
-144   -16    
176    -816   
128    32     
96     -1200  
-288   64     
-96    -128   
-304   112    
320    160    
128    -48    
160    -320   
-1408  752    
80     -224   
-64    -816   
-64    -192   
544    -96    
-1104  -384   
224    -608   
160    -160   
304    -432   
-176   160    
-80    -1264  
144    -240   
336    -208   
-416   544    
16     240    
-32    464    
-400   80     
336    -64    
352    -240   
-416   16     
-400   -96    
304    160    
464    -512   
-992   -16    
288    -560   
-784   -592   
-96    -432   
3312   256    
-3216  336    
704    -400   
336    -480   
-592   -128   
528    -192   
-576   144    
-176   -192   
-144   144    
768    -384   
-704   128    
-128   -272   
0      128    
96     -256   
288    -80    
-496   -1568  
176    192    
-352   0      
16     48     
544    1264   
336    -48    
-944   192    
560    -48    
-832   -240   
160    112    
-112   -128   
-960   -128   
208    0      
336    -272   
-80    -16    
-128   -608   
96     128    
16     -128   
64     256    
32     -224   
-560   16     
416    -176   
160    176    
-224   -48    
-384   -48    
320    32     
-240   -64    
-464   128    
112    -192   
-48    112    
-112   -64    
608    -80    
-992   -496   
400    48     
-80    144    
192    -16    
-128   -144   
160    80     
432    80     
-320   -48    
400    -112   
-176   -144   
-160   288    
112    -48    
112    272    
112    -80    
-64    128    
64     16     
-176   -192   
-304   -32    
272    112    
-240   96     
-144   320    
464    240    
-288   48     
-384   160    
128    -272   
-64    -48    
-32    -160   
16     64     
112    -400   
176    112    
-336   208    
80     -352   
-32    -688   
112    -16    
-960   -288   
800    -880   
-1136  80     
160    -272   
560    352    
-464   -160   
-128   256    
-720   -304   
480    -80    
-784   224    
-544   -32    
-96    -96    
-480   256    
304    -48    
-1360  352    
16     -224   
-128   -160   
64     176    
128    0      
64     160    
-368   -528   
176    -576   
-624   208    
608    -384   
-112   -416   
-304   192    
0      -80    
240    464    
256    144    
-624   96     
-320   128    
-512   0      
160    48     
192    -96    
-80    -304   
-352   -112   
-160   80     
128    -128   
16     272    
-16    -160   
16     32     
-416   -320   
272    -64    
48     -128   
-240   336    
32     96     
-96    80     
-32    0      
-704   -64    
528    800    
-1488  -480   
960    704    
-32    128    
-192   -160   
304    112    
-80    -112   
-48    896    
336    288    
-320   304    
352    320    
176    192    
-384   64     
-176   48     
-1408  -336   
-208   -80    
192    -160   
-80    80     
192    0      
64     -96    
-176   112    
-224   -304   
928    1184   
592    -16    
-1472  896    
1584   16     
-464   192    
80     976    
592    496    
-464   -464   
0      64     
-496   -48    
384    0      
240    -224   
-272   0      
-32    128    
-400   352    
240    64     
272    592    
-128   640    
-208   320    
0      80     
128    0      
16     256    
16     1488   
1040   1072   
-432   368    
-208   768    
320    352    
-672   208    
160    -496   
208    -160   
256    160    
-336   224    
-96    144    
-272   -816   
-304   144    
-464   544    
-432   -608   
-64    -464   
176    -224   
-752   -128   
48     -96    
64     416    
-144   496    
-192   144    
96     -224   
-672   -32    
32     560    
384    336    
-400   48     
-352   -944   
1392   -1856  
736    720    
288    -496   
-1216  -352   
-512   -1120  
352    -16    
496    1472   
-208   64     
-480   16     
80     432    
208    16     
560    240    
32     -176   
-512   -592   
-320   -416   
608    128    
320    336    
-320   -128   
-272   -16    
176    832    
432    160    
-160   -400   
-16    176    
-128   -64    
-272   -416   
544    112    
-64    1792   
64     432    
-160   -848   
96     -336   
240    160    
-576   -64    
-96    -640   
160    -928   
80     128    
224    624    
224    -288   
-336   -112   
48     80     
192    304    
16     224    
-176   -528   
-288   -96    
176    448    
32     896    
384    -416   
-240   496    
192    608    
80     416    
-16    -128   
-416   -624   
688    -560   
48     -224   
-128   -16    
336    48     
-176   96     
48     1328   
864    1968   
-224   80     
-128   -560   
32     96     
64     -80    
-272   128    
64     -48    
288    -720   
208    -304   
-144   -48    
-240   544    
32     -176   
-80    -256   
336    272    
-128   336    
-160   208    
32     -288   
-48    -736   
208    -416   
144    928    
-96    432    
-288   224    
-352   -528   
1072   -1696  
400    480    
-80    256    
544    1328   
688    -176   
-256   -544   
208    -192   
-480   -160   
48     -336   
352    -32    
80     32     
-128   384    
-128   112    
368    256    
368    -144   
-160   432    
-112   256    
128    64     
240    112    
-304   -240   
112    -1168  
128    192    
80     -384   
-272   64     
432    32     
-192   -160   
128    64     
144    240    
-112   -48    
80     64     
144    32     
160    112    
0      48     
-32    64     
32     -272   
432    -576   
-80    496    
-208   464    
80     80     
64     144    
-96    -64    
-64    -320   
-32    0      
432    -1856  
-288   0      
0      176    
16     192    
112    112    
80     0      
-592   -848   
-720   -528   
752    -304   
-336   80     
-496   -224   
816    688    
-144   352    
-288   64     
544    32     
64     -400   
-112   80     
128    160    
-128   80     
352    176    
-416   64     
224    112    
-272   16     
464    -160   
0      32     
64     -112   
160    208    
192    576    
-1440  608    
544    48     
-160   16     
320    -64    
-64    0      
-176   176    
112    160    
-384   16     
336    -16    
240    80     
-272   0      
80     144    
32     32     
-160   80     
320    112    
-48    -256   
208    -192   
-496   0      
480    352    
256    -560   
-96    416    
1280   -304   
-464   16     
-1008  704    
448    320    
288    -336   
-32    -352   
-272   400    
-176   256    
336    32     
320    -176   
-592   80     
-176   208    
576    448    
448    -32    
-272   304    
-608   -944   
-80    128    
416    -176   
512    336    
-160   -32    
-336   208    
576    80     
-352   -352   
272    -240   
-320   -688   
656    -112   
656    1248   
-1200  -2256  
-1120  2016   
928    272    
-320   -720   
80     288    
-336   368    
448    -160   
-32    528    
-272   -112   
304    224    
432    -960   
-256   144    
176    -240   
-48    96     
144    -304   
496    208    
96     -432   
-672   144    
928    384    
-208   112    
-304   400    
832    -192   
-848   96     
928    -304   
-512   208    
-16    32     
512    32     
-80    -64    
-496   32     
416    80     
-240   0      
320    -160   
-176   -96    
-112   -128   
192    -1792  
288    208    
-400   -1632  
368    192    
128    -80    
-48    48     
208    0      
-304   -688   
240    -128   
-80    -816   
384    -16    
-144   32     
-64    -80    
-48    -400   
352    -288   
144    -576   
-192   -80    
80     -416   
-592   304    
592    80     
-768   -48    
272    -208   
192    -576   
-256   -48    
128    -368   
0      -128   
144    256    
-64    -208   
16     -864   
160    16     
-64    -80    
-208   32     
256    48     
-64    16     
-224   240    
464    128    
-112   96     
0      -336   
64     -496   
112    -80    
96     -112   
-144   -832   
96     -80    
80     96     
240    176    
-176   -80    
-224   -224   
80     -1776  
-576   320    
1424   352    
-320   112    
-976   256    
800    480    
688    352    
-496   144    
-304   -112   
192    -480   
512    192    
0      96     
-176   -192   
-160   -624   
432    336    
-144   544    
-48    416    
-208   336    
160    -80    
-144   -64    
-144   1104   
512    -240   
-992   16     
752    -1488  
-208   -944   
64     -528   
-240   -1408  
432    752    
-240   0      
-48    32     
48     -112   
-32    -128   
64     -48    
144    -32    
-256   -128   
-272   -32    
-208   -112   
-144   -368   
160    448    
80     -96    
48     -128   
-112   -672   
80     -64    
112    -48    
-112   -80    
176    416    
-32    32     
32     -304   
-80    -128   
32     -800   
2080   -768   
-2112  1056   
800    416    
464    784    
-720   -608   
128    -672   
1072   -1280  
-576   144    
96     1008   
48     -32    
32     -320   
240    -16    
-176   16     
-160   -96    
-96    0      
256    -240   
-144   -160   
-96    208    
96     96     
48     -576   
-240   -480   
-320   48     
2496   240    
-1552  1472   
-80    448    
992    -1312  
-1056  -1488  
-384   -1280  
272    -640   
128    48     
208    480    
-176   -64    
48     -512   
48     -320   
208    -208   
176    -48    
-736   -464   
96     -448   
224    432    
-496   256    
144    512    
256    832    
-336   384    
512    448    
-224   -1584  
-496   -1424  
800    736    
208    -304   
-272   192    
176    400    
-272   880    
-32    -736   
-896   -96    
416    -80    
-1152  -272   
96     32     
240    -416   
-544   1440   
960    480    
-528   32     
-16    256    
208    192    
-16    480    
352    176    
-384   -368   
0      144    
-80    -320   
32     -80    
0      160    
-304   144    
-48    2128   
1312   352    
-1696  -320   
-768   -896   
1200   -320   
320    -608   
-496   -64    
-528   336    
80     496    
192    192    
240    192    
-336   320    
64     -80    
80     -288   
400    -528   
-80    -176   
-384   112    
464    464    
112    16     
-208   -560   
176    -32    
288    256    
-800   -816   
32     144    
624    224    
-912   -16    
448    -384   
-912   -1888  
160    -720   
-544   -112   
256    336    
352    352    
-192   256    
-224   -240   
-80    -208   
-560   -80    
-240   496    
240    -352   
-224   -64    
48     -400   
464    -640   
-304   -736   
112    192    
0      704    
144    -416   
144    -144   
-64    528    
-176   -432   
-256   240    
368    560    
128    1120   
-912   752    
160    -496   
992    1760   
-48    192    
-992   352    
1168   544    
-464   0      
128    -16    
288    -544   
16     -432   
-352   -432   
-16    -224   
352    -400   
-48    144    
-400   144    
32     112    
-448   0      
64     -48    
128    -336   
-160   -128   
112    -112   
-256   -80    
96     128    
96     304    
64     976    
-384   624    
48     -48    
32     -400   
112    32     
-624   -2256  
-720   640    
-64    -80    
-416   -720   
560    128    
64     1392   
16     800    
16     1456   
384    64     
-128   -304   
-32    -352   
64     -224   
-16    320    
144    544    
-32    304    
0      -528   
64     384    
-128   64     
-64    192    
80     16     
448    -144   
-640   848    
368    0      
-576   -176   
48     96     
320    -160   
-240   192    
32     160    
-400   128    
656    -80    
-496   -112   
64     80     
-128   384    
304    64     
-48    16     
-112   16     
-112   16     
48     288    
224    -64    
-144   160    
-64    -32    
-304   48     
272    48     
-448   0      
384    -224   
-96    64     
-32    -144   
-112   208    
128    128    
-320   176    
80     1296   
3792   624    
-1824  -160   
-784   -208   
960    -16    
224    256    
-464   576    
-128   224    
256    128    
-400   32     
160    80     
-80    -32    
-32    224    
128    48     
336    144    
-224   160    
80     176    
-96    -32    
128    176    
-128   -16    
16     208    
-416   0      
1856   -176   
-576   784    
-816   16     
80     608    
480    384    
-48    240    
336    -32    
-224   160    
48     144    
112    80     
0      32     
0      48     
-352   0      
176    160    
256    -96    
256    240    
-480   -32    
-48    224    
672    96     
-48    944    
-640   -32    
-144   160    
688    -160   
-720   64     
672    -336   
1216   -240   
192    336    
192    -560   
-976   -16    
768    160    
48     256    
368    -48    
-192   400    
-384   688    
-128   608    
624    -112   
256    -368   
-32    272    
160    0      
-160   272    
272    112    
-32    32     
-96    -80    
208    -16    
-160   96     
320    160    
-448   48     
752    1008   
-2224  3600   
1616   -688   
-592   -112   
-1856  -640   
1200   384    
400    16     
-928   -336   
544    -112   
96     160    
16     -16    
-128   224    
224    -48    
-112   48     
-288   128    
528    -160   
-304   224    
-176   -1376  
96     144    
496    160    
-816   160    
624    96     
-16    48     
-16    -32    
624    112    
-256   -64    
-368   272    
384    96     
192    224    
-272   208    
-336   -96    
384    160    
64     -32    
64     192    
-144   96     
624    192    
-16    384    
-224   240    
112    288    
352    272    
-128   32     
-208   144    
96     16     
-160   -176   
144    -192   
416    -240   
-304   -16    
96     -320   
80     80     
-48    -592   
144    -240   
-64    -384   
-80    -176   
464    -160   
-64    736    
416    448    
-736   -528   
208    -704   
240    -304   
-240   -48    
128    -128   
48     96     
-224   -1376  
-208   -288   
288    -896   
-368   -560   
256    -1424  
-64    -320   
-128   -48    
-16    -368   
320    -48    
-48    128    
32     208    
-96    -32    
160    -128   
32     -240   
0      -144   
-160   -640   
48     848    
0      400    
-48    160    
-32    -928   
992    -64    
-592   416    
-48    -704   
-256   -576   
32     736    
336    0      
32     496    
48     -32    
-256   -496   
96     -80    
64     -128   
96     -128   
-96    -96    
-48    64     
0      -32    
-48    240    
16     -832   
128    416    
32     -144   
-80    128    
-464   704    
960    -416   
-624   -240   
0      -640   
384    -304   
-16    -320   
256    -704   
224    -528   
-240   336    
-96    32     
112    -320   
304    -128   
304    64     
-240   -32    
32     -208   
240    -1328  
160    192    
0      144    
-256   160    
368    16     
160    -176   
128    96     
-208   -272   
-64    528    
224    304    
176    -704   
-112   0      
16     -576   
64     144    
-896   -976   
2304   -992   
-592   992    
-608   -208   
1456   -736   
-288   -2144  
0      -16    
512    -80    
-640   -1104  
32     1104   
96     144    
64     -880   
16     208    
224    -576   
-192   -64    
-176   96     
16     -288   
80     96     
-368   -464   
48     -16    
320    -240   
-528   -880   
240    -336   
384    -384   
-384   -16    
592    864    
-272   608    
208    992    
-224   720    
480    -80    
-176   -1040  
-96    -864   
224    -368   
-288   -368   
208    272    
288    -560   
-768   -160   
352    -2048  
32     -1184  
-16    -864   
-96    80     
32     32     
-96    -160   
0      -448   
128    1760   
672    480    
-464   -1056  
-1136  -1584  
320    -368   
-112   -848   
-160   -624   
352    -80    
-80    -896   
-480   112    
-144   -480   
416    336    
224    208    
-128   512    
48     -624   
96     -112   
-112   -192   
-336   0      
224    -16    
-96    320    
336    -144   
160    208    
-800   432    
96     -224   
128    576    
576    -240   
-720   -1088  
1184   -1568  
1216   464    
-992   144    
-592   -336   
784    -1312  
16     -864   
16     -752   
-464   -464   
-96    480    
128    512    
176    -544   
48     -192   
-112   800    
-64    -576   
272    112    
-80    -384   
-368   -80    
48     -304   
112    -528   
48     -400   
0      -336   
-704   112    
-784   -192   
1072   1296   
496    -16    
-736   112    
64     -784   
48     176    
624    -1104  
-656   -320   
80     -192   
128    -112   
-192   160    
-208   0      
-224   192    
368    352    
-16    -32    
-48    -256   
-144   -208   
272    -688   
128    -400   
-64    -368   
-16    224    
-160   -64    
272    -96    
-432   -272   
368    -688   
-384   -208   
-16    -32    
80     256    
96     112    
-256   160    
400    -176   
48     272    
-560   -144   
464    128    
448    -464   
0      -432   
-960   -240   
-880   400    
224    128    
-432   -128   
-288   32     
96     192    
-80    0      
272    144    
64     -208   
-224   -368   
-256   224    
-672   64     
208    -80    
-32    240    
80     352    
-496   -336   
32     96     
176    -32    
-288   -192   
-80    32     
-96    144    
64     32     
-688   -144   
1568   -1040  
-1056  0      
-128   -224   
528    -128   
-128   32     
-512   96     
-144   -352   
-64    368    
256    -128   
0      32     
-160   48     
-48    176    
-160   -208   
192    -80    
-320   64     
208    -208   
-208   256    
48     -16    
240    -48    
16     -1024  
-640   400    
592    192    
-688   96     
128    32     
400    -368   
-512   192    
-144   240    
-112   304    
592    -96    
-320   -80    
-400   48     
-144   -128   
-224   160    
352    -80    
0      192    
16     -272   
-416   64     
608    -32    
-448   64     
288    0      
16     16     
-32    64     
176    272    
-448   160    
-48    272    
32     -48    
-368   -48    
272    16     
736    464    
-416   928    
-16    448    
560    -160   
-48    -16    
-144   0      
-96    -80    
224    432    
-256   96     
80     96     
160    0      
-400   -32    
144    32     
-320   -128   
368    160    
-336   -64    
368    144    
-224   144    
-112   16     
48     80     
64     -32    
192    848    
-128   -240   
-704   288    
1280   80     
-1504  48     
464    256    
368    48     
-304   64     
-352   208    
-192   -160   
-208   112    
-48    64     
144    48     
-96    96     
192    16     
-304   176    
160    -80    
128    96     
-288   0      
128    96     
-96    48     
-160   -336   
-640   400    
528    96     
-1552  32     
288    -112   
544    -112   
704    240    
240    -400   
-624   176    
240    256    
-144   -160   
-112   128    
192    432    
-384   48     
-144   192    
-16    176    
-528   -432   
160    112    
-320   176    
-528   32     
576    80     
48     32     
-240   48     
32     368    
-208   240    
416    16     
272    176    
-704   -128   
1904   4336   
-640   1488   
800    -368   
1280   -672   
-1120  -64    
16     80     
736    288    
368    128    
80     112    
-672   -48    
432    160    
80     48     
208    160    
192    80     
-512   48     
160    256    
464    -64    
-240   80     
-208   128    
384    1552   
560    1040   
-448   -112   
64     -256   
-144   -16    
-544   -64    
848    464    
224    -16    
-544   256    
0      336    
256    -112   
80     -464   
-656   -288   
304    16     
384    -368   
-544   -96    
-64    -256   
64     -464   
-32    -416   
144    -160   
48     192    
-288   -80    
160    -144   
208    -384   
-224   -208   
32     -240   
-176   0      
352    48     
-128   -208   
-512   -432   
224    48     
416    656    
256    1312   
-464   112    
-736   -96    
416    32     
400    -224   
-640   -192   
-80    -768   
-112   -528   
224    -160   
0      944    
16     112    
-32    -528   
-16    32     
-160   -416   
80     16     
80     0      
-208   -544   
96     224    
-96    -16    
64     160    
48     112    
-64    112    
-64    128    
48     464    
224    144    
-208   -128   
96     1024   
192    144    
-144   192    
-112   240    
592    736    
-624   992    
256    -384   
352    48     
224    -48    
-208   -64    
-128   -224   
-96    32     
16     -240   
192    -32    
-96    160    
-64    -144   
112    64     
336    -1392  
-224   16     
-288   96     
192    -48    
16     272    
256    64     
-48    32     
256    -272   
-1264  128    
752    192    
128    736    
112    400    
-336   -288   
-48    48     
160    320    
144    -1584  
320    80     
-208   -32    
-384   352    
368    144    
192    -16    
-144   48     
48     -16    
144    -208   
-160   -112   
32     144    
128    224    
-32    128    
-144   -384   
80     32     
-32    -64    
-16    576    
544    -32    
-192   208    
176    240    
0      -432   
-32    -496   
-1136  -976   
336    1360   
1648   -320   
-1664  976    
640    560    
576    656    
-416   160    
400    912    
-112   1312   
256    -912   
32     -752   
-256   -80    
48     -112   
96     -304   
96     336    
80     96     
0      400    
-16    96     
112    -112   
96     -32    
496    1376   
-1056  -832   
-912   336    
1952   -416   
-1184  -496   
-960   -1920  
560    -1216  
416    -960   
-960   80     
288    -368   
-160   -448   
-336   -352   
352    48     
64     -16    
-272   80     
480    112    
-208   -192   
368    320    
176    -336   
-176   96     
192    -272   
-144   128    
-112   -640   
-176   128    
800    1248   
704    608    
-432   -224   
304    -160   
-160   -176   
-192   -736   
240    -96    
-144   -384   
256    48     
176    96     
352    336    
288    1392   
-848   1184   
48     544    
416    -240   
-272   208    
16     128    
-272   -16    
112    -112   
320    -96    
-16    -16    
-208   64     
192    160    
528    -64    
-768   -960   
-48    -496   
-368   2176   
176    464    
-944   -224   
-256   -448   
1680   736    
-720   -96    
-368   256    
224    -128   
48     -1232  
432    448    
48     -400   
-544   -144   
304    112    
224    -208   
80     112    
80     -224   
-192   192    
400    208    
192    1296   
416    592    
-368   -480   
-48    -560   
368    -32    
-496   -208   
128    -32    
144    -192   
-96    -16    
96     -384   
-720   -912   
608    -400   
-528   -256   
288    -128   
-352   -128   
-16    -608   
224    192    
-80    -368   
-272   -224   
-64    -416   
112    -160   
128    -64    
48     -336   
-176   -176   
-176   -816   
272    240    
-112   -208   
-176   48     
-48    -144   
80     -80    
192    272    
-400   304    
16     208    
464    688    
-928   448    
-16    -400   
208    -48    
-352   96     
48     128    
224    -544   
240    336    
256    -976   
-208   -288   
-112   -96    
128    16     
192    -32    
80     64     
-224   176    
-48    -224   
48     -80    
144    96     
-640   -112   
-96    -128   
64     -48    
192    -16    
64     64     
-128   -384   
48     128    
-96    -784   
192    192    
144    16     
-160   -224   
960    288    
-2832  288    
832    -64    
1008   -208   
-1360  416    
688    -144   
-480   96     
368    -608   
-32    432    
224    -368   
-224   160    
-96    -656   
272    -16    
320    304    
-800   144    
352    -192   
240    -240   
-160   16     
80     -32    
-160   96     
-368   -688   
0      -464   
-528   -96    
-272   80     
976    -432   
-576   32     
-96    -512   
512    80     
144    64     
-256   -64    
16     112    
288    0      
-256   32     
0      96     
-96    -128   
-304   0      
496    -64    
-160   -144   
400    176    
-304   -192   
192    128    
0      -624   
128    176    
-144   64     
-224   96     
384    80     
-512   -144   
320    64     
176    32     
-272   128    
-560   944    
720    384    
-400   -128   
-192   112    
112    -224   
96     128    
112    -304   
-112   480    
224    64     
-48    128    
-80    -128   
-176   -80    
-16    -144   
64     -112   
-256   -32    
272    -32    
-464   48     
336    -336   
-96    96     
80     -288   
0      192    
144    -48    
-1472  336    
464    96     
-256   48     
-128   -320   
560    192    
-544   32     
400    656    
528    -64    
-368   -224   
-64    112    
-784   -160   
128    112    
-16    32     
208    16     
-544   160    
48     -400   
-144   -144   
-368   336    
160    128    
-176   -208   
320    112    
512    -80    
-896   80     
384    -128   
80     192    
224    -288   
-464   400    
304    -192   
-176   -32    
-288   32     
128    32     
224    -64    
-208   -96    
-240   0      
16     272    
336    304    
-912   176    
384    96     
-208   -112   
-128   48     
224    -32    
-160   64     
-16    -208   
0      320    
16     240    
128    32     
32     48     
-672   -1008  
128    -784   
1072   -1696  
-80    384    
1056   240    
-1056  -48    
-1072  16     
976    -128   
272    -48    
-432   -160   
-368   0      
64     112    
336    48     
112    160    
-400   -112   
48     -192   
448    0      
32     112    
-192   -80    
-384   -112   
592    -1168  
-448   -816   
-48    -192   
160    352    
-688   48     
256    48     
112    -128   
272    0      
-480   -320   
192    -624   
48     -944   
-240   288    
112    496    
-16    -288   
96     -112   
-96    224    
-288   144    
48     0      
-416   -448   
704    -1024  
-288   -400   
-176   -144   
-16    -16    
224    0      
-64    32     
-224   880    
672    944    
-544   -544   
0      -1392  
240    -16    
-144   1008   
-144   -80    
96     784    
160    -496   
-528   -752   
560    -464   
-752   -128   
112    336    
32     -192   
-64    480    
48     160    
-16    -80    
-32    -336   
-80    336    
-176   -112   
32     224    
-112   336    
-16    928    
-720   48     
-176   -112   
64     -32    
64     32     
-16    64     
64     32     
-224   16     
32     240    
256    160    
-32    0      
0      -48    
-288   -112   
128    288    
-112   -32    
-96    80     
400    -336   
-480   224    
768    -192   
-224   208    
-144   416    
0      -336   
192    -272   
-48    80     
16     272    
-320   208    
128    -32    
192    -160   
176    32     
-480   160    
304    -288   
384    -208   
-144   -16    
-48    144    
-112   -32    
496    -208   
-1248  160    
768    32     
-48    304    
-64    0      
-96    -144   
-48    -176   
112    -288   
256    -16    
352    -192   
-192   224    
-496   352    
384    -112   
144    -128   
-224   16     
-176   96     
304    32     
240    96     
80     224    
128    -144   
-240   112    
464    32     
-288   80     
96     -128   
-320   -432   
144    416    
144    192    
112    112    
-624   240    
16     16     
-1392  688    
2272   -224   
-448   -512   
-608   -1072  
512    400    
640    -320   
-336   96     
-32    2032   
-432   304    
192    -992   
96     -832   
-400   240    
-16    576    
112    -16    
80     -64    
128    -112   
-288   240    
-96    48     
208    -176   
96     -304   
128    1328   
-688   -992   
-960   720    
1552   256    
-928   304    
-240   -656   
-576   -1216  
464    -768   
-480   96     
96     256    
336    16     
-224   0      
-144   -256   
-112   16     
304    64     
-528   128    
288    32     
-80    352    
272    -528   
-48    160    
-128   208    
96     416    
-144   288    
-752   -48    
-208   -256   
784    -464   
48     320    
-288   112    
96     96     
96     688    
720    -176   
-400   128    
-16    -32    
256    -368   
368    384    
-160   -1280  
-992   240    
1104   -352   
416    128    
-272   192    
112    352    
-32    -48    
176    192    
592    -400   
-480   544    
272    -128   
-16    144    
432    64     
352    896    
-1440  -512   
512    -1824  
1264   0      
-1264  -128   
-304   320    
272    -32    
544    -80    
-480   -176   
-288   208    
-128   -240   
32     464    
288    -192   
-32    272    
-176   -80    
-384   -32    
416    96     
288    -688   
-144   16     
32     -1440  
-432   0      
432    144    
-368   368    
80     -224   
80     240    
-304   -64    
-160   -352   
-192   -368   
176    -224   
0      -160   
160    -112   
-144   -160   
112    192    
96     352    
-96    -768   
-96    192    
-128   -96    
288    256    
-240   768    
-80    816    
368    384    
-176   -32    
-272   -48    
464    -64    
-144   -16    
464    16     
160    64     
-320   -96    
-160   288    
112    -208   
544    480    
-512   -384   
-48    272    
208    416    
768    96     
-592   -848   
-688   -128   
1008   -112   
-448   -272   
400    -96    
-176   16     
64     -32    
48     -224   
-16    112    
128    -32    
48     464    
224    -144   
-224   32     
64     -128   
64     400    
240    224    
16     16     
-176   160    
128    -160   
144    144    
-96    -384   
128    -48    
128    16     
-80    80     
192    64     
-48    176    
80     -192   
-400   -2480  
-528   1072   
1216   288    
-816   208    
496    -48    
-64    96     
-96    -240   
-304   672    
640    -384   
16     -144   
-32    224    
0      64     
-160   -96    
352    48     
-368   48     
432    -32    
-112   240    
32     -608   
96     240    
128    -256   
272    368    
-768   -560   
-96    352    
1248   -32    
-624   64     
-224   -224   
176    272    
64     -400   
352    -640   
-64    48     
-288   160    
128    128    
336    -368   
0      -192   
48     304    
192    -304   
-192   16     
480    144    
-256   -112   
32     -640   
208    -160   
-64    -400   
80     48     
48     80     
-192   96     
544    -32    
-400   -16    
-48    -96    
176    -32    
-96    -80    
-1200  32     
2096   272    
-80    -448   
-1104  -368   
800    -432   
-144   80     
-336   -1376  
480    64     
-112   -176   
-288   128    
256    -208   
144    80     
-64    32     
-320   96     
464    96     
-272   -32    
16     -48    
192    224    
-16    160    
320    -176   
16     128    
-656   -400   
1840   -560   
-512   336    
-800   288    
464    -144   
16     192    
-16    -16    
96     -400   
-336   144    
144    -208   
-48    -96    
80     0      
-48    -176   
-48    -96    
-256   96     
240    -528   
320    48     
-176   -624   
48     -224   
144    80     
224    288    
-1344  448    
784    -736   
64     256    
-592   -208   
256    -128   
240    144    
-992   128    
32     -496   
64     -112   
112    -640   
-144   128    
144    -48    
16     96     
-64    -400   
-816   -288   
384    -96    
-320   -240   
80     224    
512    96     
-416   -128   
80     128    
-240   -160   
-64    -144   
-128   -32    
352    -352   
16     224    
-624   -960   
192    144    
-160   -2736  
-1536  -720   
240    864    
-432   224    
-288   80     
592    -16    
-1104  2016   
752    480    
-368   352    
240    -416   
112    -96    
-16    96     
16     160    
-208   -128   
-256   -320   
272    -640   
240    224    
-96    0      
-80    -560   
-416   -576   
304    128    
-96    224    
0      352    
576    992    
16     400    
96     -160   
-192   -1120  
-288   -400   
96     -480   
224    352    
-16    448    
16     -320   
-480   -416   
272    80     
96     0      
64     -560   
-640   -976   
304    -752   
-96    192    
-128   160    
80     208    
-1280  -272   
64     48     
0      896    
80     1424   
-128   512    
-640   64     
384    976    
-848   -128   
144    432    
-336   -352   
464    1040   
160    480    
-192   640    
160    640    
368    272    
272    512    
-512   -208   
96     -944   
-272   -32    
16     160    
-352   -304   
-208   288    
-160   80     
176    112    
-1840  -304   
-80    -48    
240    112    
32     240    
208    -192   
-208   176    
16     -224   
32     80     
48     -32    
48     48     
48     -96    
-304   -80    
320    -544   
416    32     
-304   80     
16     -80    
-432   1056   
480    -224   
-272   0      
-80    192    
80     -64    
-192   112    
304    112    
-176   208    
-160   96     
160    48     
96     -16    
16     16     
-192   -96    
96     -48    
-128   -96    
128    -240   
-848   -432   
160    -608   
32     -496   
-176   128    
512    -704   
-160   432    
416    80     
-192   288    
-240   96     
-64    80     
160    736    
304    -192   
-368   112    
-336   144    
432    48     
-432   224    
-32    -16    
192    -192   
-224   256    
-112   288    
-32    -352   
400    -192   
32     1104   
-384   368    
-336   -384   
544    -96    
0      544    
-144   -128   
-480   160    
496    128    
80     -448   
112    80     
-192   240    
768    -400   
-2960  16     
448    96     
1008   976    
-208   -704   
-944   560    
2080   64     
-1296  -208   
-240   448    
864    176    
-400   -128   
-208   -48    
-128   -32    
144    224    
-192   256    
-128   208    
32     48     
-144   112    
64     192    
64     16     
-240   208    
160    1072   
2032   16     
-1632  96     
544    80     
-112   -96    
-464   -128   
560    -208   
-80    336    
-112   -96    
144    144    
176    32     
32     112    
-144   -160   
-352   64     
496    112    
-48    96     
-256   -160   
-96    0      
144    208    
-176   48     
272    224    
368    -544   
-448   368    
0      160    
128    -512   
-368   -320   
-208   32     
400    48     
128    144    
-256   -16    
16     64     
48     -144   
320    144    
320    0      
-192   -96    
-48    144    
-352   -208   
32     448    
-496   432    
432    -48    
432    0      
-272   32     
-48    160    
192    0      
-240   -928   
-384   240    
576    128    
-1168  -32    
688    -1440  
336    -336   
-2736  208    
544    -112   
1136   80     
-368   -384   
-592   336    
-304   -112   
192    176    
496    16     
64     48     
-320   32     
112    384    
-144   192    
-32    16     
-48    176    
80     176    
-160   96     
32     112    
-16    -176   
1040   -304   
-640   -64    
256    208    
-128   -48    
-768   16     
432    64     
592    320    
-544   -192   
-144   288    
800    -64    
-528   176    
336    -32    
-64    224    
64     -64    
-288   64     
656    -240   
-448   -112   
-64    208    
208    304    
112    -16    
160    -32    
-48    144    
-352   -128   
320    416    
-144   64     
240    224    
-160   0      
-64    -1248  
-208   -176   
400    -96    
-304   64     
112    160    
160    480    
48     -16    
-464   288    
400    -16    
-624   32     
240    208    
64     -480   
-208   -320   
-48    -272   
-176   -224   
336    -144   
-80    -16    
-80    -64    
-96    -256   
112    128    
176    208    
208    -336   
-96    1184   
-512   624    
656    -112   
144    -64    
-192   352    
-176   -80    
128    -96    
112    -112   
240    -176   
16     224    
-240   -2848  
64     128    
208    288    
16     2400   
1680   -704   
-1680  400    
416    -144   
112    192    
192    -144   
-64    -64    
-592   608    
400    -112   
-96    64     
336    -80    
-208   -32    
-96    -1152  
-128   -400   
592    -288   
-160   624    
-64    240    
-32    -272   
-48    -144   
128    208    
112    -640   
-688   720    
784    -144   
-448   -48    
192    112    
-48    -128   
-144   -64    
-16    -112   
272    384    
288    -928   
-144   32     
-400   96     
176    -48    
256    128    
0      32     
-224   64     
336    352    
-400   32     
368    -112   
-128   64     
-16    -192   
-144   80     
80     -288   
48     0      
80     -1344  
-48    0      
64     0      
-16    80     
-96    80     
-784   -1488  
1872   -800   
-608   0      
-464   -176   
864    48     
-704   -480   
-128   160    
720    128    
-320   -464   
64     -96    
128    -1328  
-32    128    
-224   400    
464    176    
256    224    
-368   -160   
160    160    
192    240    
-144   224    
-128   240    
112    192    
-320   -672   
1120   880    
-352   -16    
-512   160    
1600   -32    
-448   -32    
240    640    
528    160    
-176   -320   
304    0      
-496   144    
160    48     
368    224    
-192   -160   
-272   -112   
272    -336   
160    -16    
224    -224   
208    176    
32     432    
-448   480    
96     -144   
-224   -992   
400    240    
-320   160    
64     -432   
1360   560    
-288   -512   
-160   -416   
416    -112   
-320   -96    
144    96     
96     32     
48     176    
-640   96     
-80    624    
736    -512   
-464   -448   
-112   704    
-240   -480   
224    -608   
144    -64    
-240   -896   
144    -144   
256    480    
192    336    
-640   64     
240    288    
400    112    
-48    -112   
1232   2176   
-1488  1120   
-832   -240   
2176   -176   
-304   768    
-992   -1248  
-560   -1456  
1136   -576   
-320   16     
-128   -192   
-144   496    
592    -256   
352    -176   
-80    160    
-96    48     
208    336    
-224   128    
32     -528   
208    -176   
-176   -352   
-272   -480   
-80    96     
224    304    
128    -32    
-432   -640   
320    -864   
208    736    
-16    1424   
160    -1312  
64     192    
80     160    
-48    80     
-48    -160   
128    0      
-224   368    
64     -160   
96     -256   
-16    640    
-64    464    
96     -736   
256    -416   
-480   144    
128    336    
160    -80    
432    464    
-176   -64    
-336   -128   
256    112    
128    400    
64     256    
-176   64     
-736   320    
1376   -624   
-336   576    
-48    1344   
0      400    
384    640    
-256   1136   
-416   -1808  
464    -320   
288    -1760  
-240   16     
176    48     
-112   192    
16     128    
272    144    
0      -368   
80     -880   
160    320    
224    704    
-544   -208   
-32    -16    
256    -48    
0      -32    
128    -48    
-48    -784   
-144   -336   
560    -1072  
576    -480   
-368   -48    
-320   -64    
416    448    
272    688    
-80    -304   
-432   -272   
160    -368   
-176   -208   
96     -208   
288    -208   
64     0      
-208   -528   
64     -112   
48     -128   
144    -128   
-176   -80    
0      -144   
-208   -480   
352    -208   
160    -160   
-240   -288   
-432   -400   
688    -304   
208    -112   
-560   208    
512    912    
144    48     
-256   -432   
352    -560   
-80    256    
-80    272    
80     -48    
208    -128   
0      -48    
-192   -112   
160    160    
-272   112    
176    -96    
-96    192    
0      -448   
80     80     
-288   -208   
-112   288    
-112   208    
288    -144   
-288   288    
400    -128   
-336   128    
400    -64    
-128   48     
-224   -896   
-112   -1568  
1600   384    
-832   336    
-1232  64     
1568   160    
-816   384    
-384   672    
688    32     
-848   -288   
-128   -464   
-224   0      
448    96     
128    32     
-128   -32    
-880   -96    
464    112    
-96    -112   
-16    -128   
-96    -144   
144    32     
32     80     
416    416    
-1696  416    
816    160    
-192   48     
-176   -128   
272    128    
-784   192    
64     240    
-368   -368   
-224   48     
224    0      
-144   80     
0      32     
112    -128   
-112   288    
544    -192   
-544   32     
304    160    
368    128    
-128   112    
-64    16     
-656   -80    
544    -144   
208    48     
224    -48    
48     112    
-96    336    
-16    -160   
-64    -16    
560    -32    
-144   32     
-672   32     
144    48     
416    -144   
-272   -224   
176    608    
-448   336    
-112   -240   
-736   -608   
288    -48    
-224   -208   
-160   0      
256    128    
352    160    
416    224    
-1200  368    
-48    80     
608    112    
-288   -400   
2528   2192   
-2656  1648   
592    -1056  
1360   -464   
-1360  -144   
-128   -80    
448    -48    
240    -32    
-16    128    
-64    -96    
192    160    
336    304    
-784   304    
0      48     
-48    80     
96     32     
16     192    
-496   -32    
-368   -288   
464    528    
304    -160   
-720   224    
464    176    
-384   128    
-144   -80    
752    224    
-288   48     
-64    624    
-224   32     
240    464    
48     -80    
-272   320    
112    -336   
-240   32     
-256   -240   
-112   112    
-192   160    
144    48     
-160   176    
240    192    
-224   128    
112    32     
0      32     
-16    -144   
-176   -48    
144    32     
-384   80     
16     -112   
336    -224   
-352   -48    
112    96     
-368   -416   
608    -288   
32     256    
160    -16    
-928   320    
128    32     
240    -96    
64     -112   
-192   -192   
-224   -80    
240    96     
64     -32    
-16    208    
-368   80     
208    112    
80     -128   
-192   144    
-64    -624   
-176   -272   
176    416    
-128   96     
288    -64    
-48    -240   
-128   240    
-208   0      
96     -176   
128    64     
-112   352    
-336   -144   
-224   -112   
1600   1808   
256    160    
-1392  608    
-48    -240   
160    -80    
432    288    
-224   784    
128    -384   
-448   -336   
448    0      
256    352    
-224   -192   
-64    144    
-80    -496   
384    -368   
-96    240    
80     64     
-160   416    
-48    -224   
112    0      
576    192    
-1056  832    
896    80     
-608   0      
304    624    
384    592    
-528   -288   
-80    336    
128    48     
224    -128   
-224   -160   
240    -448   
-128   160    
400    192    
-112   144    
-304   416    
80     144    
64     -320   
144    -80    
-144   -208   
-224   128    
32     -112   
272    80     
-32    -144   
-96    -96    
176    240    
80     64     
0      48     
-240   -64    
-384   -1200  
640    -960   
288    -720   
-80    224    
208    448    
-640   240    
16     160    
64     -32    
432    -496   
-208   176    
-144   144    
432    368    
-112   64     
-480   -480   
672    -320   
-144   -208   
-192   96     
288    512    
-144   544    
80     480    
64     400    
256    752    
96     -704   
-2144  -608   
2432   -768   
-208   128    
-1584  656    
-96    -336   
1120   -1376  
-240   -1264  
-320   -224   
-144   128    
144    80     
112    160    
-48    400    
-224   -192   
144    144    
-96    0      
384    -432   
-528   -448   
208    -2928  
16     -176   
-112   272    
-144   -576   
256    -736   
-128   -304   
-640   944    
912    144    
144    -144   
0      -224   
96     -224   
-208   -176   
-112   256    
0      -48    
-432   400    
896    -1680  
240    64     
-256   464    
416    96     
-704   -112   
208    128    
-16    -336   
-480   144    
144    -208   
368    112    
-48    -224   
-384   -576   
112    -112   
-192   -288   
-112   144    
192    -1024  
-496   -1808  
-1568  -1584  
304    16     
-304   288    
928    1376   
224    832    
-448   1008   
112    -1152  
224    464    
-32    32     
-112   592    
-432   -592   
96     352    
368    192    
-192   -64    
-144   368    
-304   -368   
-144   -16    
336    -320   
-32    176    
-112   384    
176    304    
-176   -96    
48     368    
288    544    
16     608    
-512   512    
608    448    
224    -144   
80     -448   
-112   384    
-256   -224   
224    352    
176    272    
-304   -192   
-112   -208   
480    512    
-272   -208   
-304   480    
416    1184   
144    -128   
240    240    
-112   368    
160    176    
-160   -240   
208    -240   
240    64     
0      1552   
-560   -480   
576    80     
80     -128   
176    80     
-1056  64     
192    -368   
864    -448   
-544   -320   
80     32     
-416   -992   
288    -160   
192    896    
-48    -160   
-80    -704   
128    128    
224    512    
-64    -1536  
-32    -448   
16     -704   
160    -1200  
176    496    
-128   -1040  
160    -256   
-96    -1424  
144    -432   
0      96     
32     880    
128    736    
-16    -144   
16     -1216  
288    -464   
-96    -208   
576    1120   
-1536  624    
976    -1008  
288    688    
112    -288   
-304   448    
288    -880   
240    -416   
-32    -448   
112    688    
-80    96     
16     -320   
112    -480   
-112   -304   
-128   -240   
80     -208   
304    -240   
96     -96    
-336   0      
192    -128   
32     48     
384    1648   
-96    192    
-336   -464   
320    176    
112    -928   
64     -352   
-224   -352   
288    -112   
208    -224   
-16    -32    
48     80     
-16    -272   
0      80     
112    -160   
96     -80    
48     -16    
-144   48     
240    -928   
-16    32     
96     -448   
-48    112    
-400   48     
288    256    
-144   -240   
32     -64    
32     -160   
-80    112    
-48    -32    
64     144    
-1296  288    
784    -48    
-80    -80    
-224   -224   
64     64     
320    -544   
0      144    
-192   -320   
-80    256    
80     -336   
-144   80     
128    -32    
-112   -32    
48     -112   
176    -64    
-912   -16    
128    112    
-32    -80    
-288   -80    
448    64     
-32    -304   
-352   -576   
-608   -144   
816    -64    
-560   -128   
352    -160   
256    32     
112    16     
-656   -352   
64     -224   
64     32     
432    32     
0      96     
-176   -240   
16     -32    
-48    -208   
144    16     
144    -464   
48     608    
-544   0      
64     -624   
352    -160   
224    -160   
-768   -128   
608    -112   
1136   -48    
-288   -512   
192    -640   
720    -208   
-608   208    
48     0      
528    192    
96     -432   
16     -256   
-96    288    
-96    -288   
240    96     
448    -208   
128    256    
-352   -16    
64     176    
416    -16    
-144   224    
-160   -16    
96     96     
16     -208   
48     -96    
-128   -528   
432    -112   
-96    448    
-1280  -2752  
-592   1680   
1584   -416   
-1904  -352   
1328   176    
256    64     
-256   560    
144    -48    
-224   -48    
-288   16     
-112   -80    
144    -128   
-64    -240   
-1136  -96    
-96    192    
-304   80     
-368   96     
-144   -224   
-80    -176   
544    -1008  
-352   160    
544    -48    
-608   96     
-864   -352   
256    -32    
-176   -304   
112    -48    
-32    48     
160    -96    
-112   -16    
-496   -48    
400    -64    
-624   0      
224    32     
-336   240    
272    64     
-240   -144   
304    -208   
-160   -112   
64     304    
192    -32    
-128   128    
-64    272    
16     -80    
-224   16     
-176   16     
96     16     
96     -16    
-640   -272   
-352   -416   
-16    -304   
-96    -624   
-832   304    
672    64     
-656   480    
480    192    
-48    -192   
-368   -752   
-304   -656   
64     -144   
-16    32     
-112   -16    
32     0      
112    -112   
-336   -272   
-208   16     
-144   64     
224    96     
16     240    
112    320    
48     480    
16     -80    
-160   -128   
80     -128   
-128   144    
80     352    
-208   -112   
0      -368   
48     -144   
-192   -64    
-160   208    
736    2016   
336    592    
-1024  -752   
176    64     
-80    192    
336    320    
-208   224    
112    768    
-112   224    
-128   144    
320    -176   
-48    112    
-128   256    
-112   16     
208    160    
-240   64     
-48    64     
176    112    
-192   -144   
-16    0      
-320   -656   
640    -576   
-384   1104   
80     -288   
-48    -416   
32     288    
128    224    
-80    32     
-144   -112   
160    400    
-80    -752   
-48    -320   
96     -208   
112    464    
160    48     
480    -96    
-656   -512   
-96    816    
224    -288   
64     -16    
-64    176    
-80    16     
-240   128    
80     -176   
160    -64    
-576   0      
112    272    
16     0      
368    -480   
-1040  -144   
-64    704    
2112   -32    
-1632  160    
992    -592   
336    -112   
-208   400    
432    -112   
-112   272    
-240   -368   
-96    528    
96     -192   
144    -32    
-48    384    
32     304    
16     0      
48     192    
208    112    
-336   -176   
192    96     
-32    -96    
560    1392   
-1216  -752   
-800   272    
1680   800    
-224   272    
-464   -352   
160    576    
368    1936   
-208   2352   
624    528    
-224   -880   
-448   -320   
288    320    
192    192    
-288   -48    
-160   288    
160    16     
176    192    
272    80     
-112   -96    
-128   -80    
112    -128   
-80    112    
-96    -448   
1104   -816   
-480   240    
-368   1120   
640    -864   
-592   384    
240    0      
-80    -32    
144    -144   
464    -256   
-784   496    
416    816    
-416   304    
224    448    
0      720    
-400   672    
880    112    
-208   16     
-288   240    
32     -128   
-304   -80    
160    -400   
-368   288    
32     320    
-192   448    
16     144    
112    208    
1008   -240   
-2400  64     
-368   704    
1168   64     
-16    -144   
-448   -1280  
-320   -640   
128    192    
96     48     
336    272    
48     16     
-256   0      
80     0      
144    400    
-112   -192   
96     -64    
160    -32    
-64    -352   
0      -768   
-64    -48    
-64    144    
80     352    
320    224    
240    -144   
-400   -208   
176    -736   
-144   -464   
96     -832   
-96    -528   
128    -400   
-208   1296   
192    688    
-48    -464   
-16    -528   
-48    80     
320    -128   
-528   -480   
272    -64    
-48    -320   
-80    176    
-96    80     
32     -128   
-80    -128   
-288   -288   
144    80     
592    352    
-224   304    
-112   -192   
144    -432   
96     -320   
-16    32     
-96    1120   
752    240    
-64    -224   
-528   -1296  
-336   -800   
-176   -1408  
-464   -832   
160    -624   
96     176    
176    384    
-128   -688   
-160   304    
592    384    
-80    80     
-208   -368   
-48    656    
320    112    
112    768    
240    576    
-240   448    
32     0      
96     0      
-32    32     
192    -128   
-464   -1168  
-80    -1296  
416    -448   
-400   48     
112    240    
944    1056   
-1680  1472   
1072   -480   
96     240    
32     64     
-16    208    
-576   608    
592    -32    
-448   320    
400    -240   
-176   192    
-48    -304   
96     416    
176    -1312  
-352   400    
192    64     
-48    240    
-80    240    
64     -32    
32     -64    
-144   176    
-512   -320   
1168   -336   
-128   -32    
-1216  -48    
1264   -64    
-96    -48    
80     192    
-288   -896   
256    -64    
48     -304   
80     160    
128    -128   
64     112    
-160   128    
176    192    
192    304    
128    -240   
-32    112    
16     -832   
48     144    
16     -304   
224    192    
16     -1296  
-96    48     
-64    -48    
48     48     
352    96     
-176   112    
-112   -64    
-896   -2128  
-48    -48    
464    -32    
-1168  144    
1168   208    
336    -96    
-768   16     
192    240    
-144   -320   
48     80     
304    16     
-48    112    
16     -80    
224    208    
-432   -144   
0      80     
416    0      
-368   96     
320    48     
-160   -144   
224    96     
448    736    
-1376  -288   
-80    832    
704    -64    
-1344  160    
1440   480    
-784   -16    
352    -1488  
128    -624   
-160   -32    
48     -464   
80     -32    
16     -928   
48     -128   
-128   64     
80     -112   
112    304    
288    -128   
-144   -160   
80     160    
-192   -864   
736    -176   
-272   -352   
48     16     
-192   -320   
208    -992   
448    -288   
-240   -416   
496    -272   
-128   -128   
-240   -80    
96     -480   
144    48     
-272   -528   
448    352    
-16    -128   
-48    96     
304    -400   
-208   -64    
208    -96    
192    -224   
32     -16    
128    128    
176    0      
16     112    
0      -32    
-272   208    
16     128    
-48    -880   
2112   -3440  
-3280  -784   
1680   960    
128    -64    
-528   -80    
0      240    
-208   -224   
128    192    
-320   -496   
208    64     
112    -800   
-512   0      
624    96     
48     112    
-384   -128   
288    64     
192    -208   
64     -32    
96     16     
32     -272   
-240   336    
480    16     
-1264  -112   
-496   -64    
384    80     
208    -32    
80     320    
96     -496   
-352   320    
464    -240   
-48    224    
-32    64     
64     112    
336    288    
-416   384    
416    544    
240    -16    
-224   128    
320    64     
-624   112    
400    112    
-48    144    
96     -352   
32     -208   
-416   -880   
-32    400    
432    1184   
208    528    
-320   288    
368    240    
-128   -208   
16     -720   
-320   144    
288    448    
-544   416    
416    256    
64     784    
272    -64    
-96    608    
-240   -576   
416    320    
48     96     
-64    0      
0      624    
-80    704    
128    352    
128    496    
-176   784    
-176   624    
-96    -1040  
256    -480   
-32    272    
-96    192    
16     128    
160    -384   
144    48     
-208   -240   
208    560    
-480   -224   
144    32     
160    128    
-576   1584   
928    -368   
-320   288    
-304   1456   
400    96     
480    128    
-656   944    
-240   16     
112    -208   
176    -352   
48     -128   
-96    112    
-48    -224   
144    320    
80     -112   
-240   16     
-192   -304   
96     64     
48     208    
128    64     
-336   416    
-128   -160   
-416   128    
-80    144    
128    -160   
144    -336   
-464   96     
-96    368    
80     240    
128    -224   
0      48     
-32    -144   
-560   144    
-112   112    
48     -112   
-64    400    
-288   -352   
16     -416   
112    -128   
272    112    
-128   -32    
-128   176    
-224   48     
-224   48     
-144   -176   
192    -96    
-240   176    
-176   48     
304    80     
-528   -784   
1712   -1088  
-304   608    
336    -480   
16     0      
-464   -192   
-160   -256   
-256   800    
304    -768   
-512   -176   
-224   16     
16     256    
224    368    
-128   -480   
-80    -64    
-128   -320   
128    304    
192    192    
-368   352    
240    -992   
-64    416    
336    -368   
-2000  336    
1040   -16    
-432   432    
112    736    
0      528    
176    1200   
-1088  1376   
-32    48     
448    -832   
-576   -912   
-224   -560   
176    -592   
-368   32     
-224   32     
16     272    
464    704    
-480   608    
-144   112    
144    48     
-224   32     
-48    256    
-736   48     
-208   208    
320    256    
-96    256    
64     0      
-448   -1680  
-208   -736   
368    0      
-336   96     
-112   16     
400    368    
-336   96     
-128   -160   
640    -48    
384    2272   
-1360  1376   
-144   176    
400    -528   
-256   48     
-112   64     
-352   -480   
160    -400   
-112   -448   
-128   -128   
224    192    
-112   -592   
272    -256   
-256   176    
96     1536   
1008   -80    
-832   128    
-624   656    
368    624    
832    -1248  
-1120  -1328  
-240   80     
288    -80    
528    272    
48     -96    
-576   208    
32     -80    
208    0      
592    144    
-160   48     
-416   128    
32     176    
48     160    
160    -624   
-272   -128   
16     -80    
96     96     
-432   16     
736    -32    
-240   0      
-208   -64    
240    80     
-96    -320   
128    -688   
-240   -608   
-32    96     
-192   112    
-80    -48    
112    32     
336    48     
-464   -128   
144    176    
208    48     
64     160    
-160   -16    
112    224    
192    112    
-480   16     
208    224    
224    32     
-96    576    
48     736    
432    192    
-32    -48    
-112   -320   
432    -448   
-576   -32    
-16    -96    
48     -176   
0      112    
112    208    
-128   288    
-16    -48    
32     16     
-32    32     
-16    -80    
0      -32    
64     64     
-32    144    
16     112    
64     -16    
-64    -32    
112    768    
352    -80    
-384   -16    
112    96     
-32    48     
48     96     
384    912    
-896   368    
240    -128   
224    48     
-16    -160   
-112   -32    
-880   -816   
1760   -704   
-304   -16    
-784   -208   
752    304    
224    160    
-608   544    
32     -64    
-16    32     
176    48     
-64    -16    
64     -496   
-48    336    
272    496    
-32    64     
-112   -224   
288    -80    
-256   272    
96     64     
112    32     
544    1264   
-1120  -288   
-336   352    
1056   -384   
-112   -64    
-368   32     
-128   -320   
384    208    
-48    160    
336    -32    
-464   64     
-48    112    
256    128    
416    80     
-656   128    
112    48     
48     -224   
256    32     
-256   64     
208    160    
-208   128    
-80    -864   
0      80     
48     -32    
400    144    
-656   16     
336    304    
80     0      
-176   48     
-192   -592   
272    -896   
128    -96    
432    0      
-672   -144   
-128   160    
752    208    
-160   -64    
-208   256    
48     -64    
-144   128    
304    128    
16     176    
-96    16     
-128   208    
512    128    
-400   160    
-48    -112   
336    160    
-240   -144   
240    -144   
-32    192    
-800   -640   
1392   -240   
-48    -848   
-704   0      
928    144    
-112   160    
-320   -352   
48     192    
256    112    
-96    96     
-192   0      
528    224    
-240   -128   
-192   96     
400    48     
-80    -16    
96     -32    
-160   -784   
256    128    
96     144    
-48    -144   
672    -144   
-528   208    
48     -96    
272    112    
-128   96     
272    1104   
-336   -48    
-32    -96    
384    208    
96     -48    
256    -32    
-48    -272   
256    80     
224    -240   
400    -112   
-320   -160   
240    -80    
-448   336    
224    32     
-144   16     
304    96     
144    112    
-240   -144   
0      176    
704    -208   
-96    144    
-368   -352   
-512   -1120  
-352   912    
96     528    
-1648  -208   
304    144    
1712   -144   
-928   -144   
-256   176    
-112   -384   
128    272    
432    -320   
-256   256    
32     -400   
-192   208    
224    -192   
192    -48    
288    -800   
-368   80     
384    96     
-192   -240   
-336   -48    
384    288    
160    256    
-176   -704   
-336   48     
496    -304   
-208   -176   
-432   -144   
208    224    
0      -224   
528    -144   
-640   -1248  
96     -192   
336    -256   
272    112    
-592   -320   
176    -832   
336    -112   
-448   288    
336    240    
192    176    
-80    128    
96     80     
240    160    
48     -240   
32     544    
208    560    
64     176    
96     352    
48     -512   
160    -224   
-112   -1408  
-144   -496   
720    -384   
-352   -528   
352    0      
-160   -336   
-288   -1568  
112    -128   
288    1456   
-128   832    
288    -112   
-48    -176   
128    160    
-112   -384   
176    256    
48     560    
192    64     
-448   -64    
64     -224   
224    112    
240    -656   
-48    0      
-144   -608   
144    400    
112    608    
-96    -64    
128    -240   
-80    64     
-192   64     
16     112    
304    -128   
-192   -624   
-96    -320   
-432   -192   
432    -400   
64     80     
80     -128   
-160   48     
-240   160    
144    -32    
32     -80    
96     -208   
-48    96     
-48    96     
16     160    
32     -192   
-320   144    
-112   -144   
-32    -144   
208    -128   
-80    112    
176    576    
688    -304   
-736   -64    
192    -784   
48     -48    
32     96     
272    192    
96     144    
-352   0      
-208   -80    
384    -144   
160    -240   
-176   192    
464    -16    
-240   -320   
128    64     
160    -240   
-208   176    
112    -480   
112    48     
-144   144    
144    208    
-208   112    
-224   -112   
0      304    
192    16     
-160   -160   
-336   -320   
544    -496   
-352   -848   
176    -240   
1376   -352   
-1680  -352   
704    -992   
272    16     
-192   -1072  
-208   -48    
336    1760   
32     -832   
-64    144    
272    48     
-32    208    
-208   -144   
128    -112   
64     -192   
-416   256    
0      -400   
80     -544   
512    -144   
-144   720    
-64    -816   
-544   512    
1584   -368   
-1280  208    
128    480    
0      464    
192    688    
-1088  1696   
496    1152   
336    848    
-240   48     
160    -272   
-192   -304   
-224   -320   
-48    288    
288    -384   
320    752    
-880   672    
-16    -224   
192    560    
480    112    
-336   176    
-432   -64    
736    -224   
-272   64     
-608   -1024  
-256   -752   
224    -528   
-224   -64    
384    224    
-512   112    
-16    48     
384    -48    
112    -416   
112    -64    
-96    112    
208    80     
432    -16    
-528   -192   
288    -192   
224    240    
-576   -16    
400    288    
-640   288    
304    144    
-672   -16    
-560   -32    
32     80     
-80    576    
-288   -1584  
-128   -1680  
912    416    
-240   48     
-1504  352    
96     64     
704    -288   
-96    304    
80     -32    
-560   192    
560    -176   
-192   64     
16     16     
-208   -48    
-576   -16    
480    -176   
-336   -64    
144    -64    
-304   -96    
320    560    
224    -1328  
-288   -464   
48     -224   
-128   48     
-336   -144   
864    -32    
-368   32     
112    -176   
48     272    
288    48     
-144   80     
-176   -192   
-64    -64    
-112   272    
-144   80     
-224   -144   
144    -64    
96     -16    
-144   256    
-640   -16    
480    48     
240    -16    
-288   0      
64     16     
-656   -224   
576    384    
-208   384    
-64    368    
-224   -160   
0      -368   
-128   -448   
32     0      
416    512    
576    288    
-272   144    
-416   176    
64     32     
-320   32     
48     -16    
-112   128    
112    48     
-192   -32    
96     32     
-272   -32    
112    144    
-912   48     
0      -192   
-128   -560   
64     -144   
-192   192    
288    -112   
-336   48     
-64    32     
208    64     
0      112    
-48    128    
-176   192    
240    -528   
-176   112    
80     336    
-192   -128   
-352   -2608  
-832   1232   
1424   64     
-800   320    
432    320    
448    48     
-720   -16    
-336   -32    
576    112    
32     16     
-224   -112   
-192   64     
-16    112    
400    144    
-576   -16    
160    -160   
144    0      
-176   256    
272    -304   
-32    128    
64     560    
-432   -256   
-496   432    
1040   -16    
-208   96     
-752   96     
432    48     
256    288    
-16    -32    
-80    -160   
-80    304    
192    208    
0      160    
-160   32     
-144   16     
144    -128   
304    -224   
-464   0      
448    -32    
-240   304    
160    16     
-96    272    
-48    -48    
48     192    
192    64     
-480   176    
32     48     
32     128    
240    48     
-400   -448   
320    688    
480    -688   
-112   240    
-240   -96    
-160   208    
192    -32    
-96    896    
-64    656    
-144   384    
-352   -80    
160    -16    
64     32     
32     64     
160    -32    
-752   0      
688    144    
-288   0      
80     0      
416    112    
-176   -16    
0      112    
-528   -320   
208    192    
800    -208   
-1216  -368   
576    192    
320    32     
-272   48     
-480   -208   
336    64     
224    96     
-96    48     
144    80     
-224   48     
-96    -64    
176    112    
144    112    
-240   -96    
96     256    
112    96     
-16    16     
16     -16    
448    416    
560    -400   
-976   272    
848    96     
-560   0      
-176   0      
752    192    
-496   272    
-272   -96    
368    160    
64     -32    
64     -32    
-160   240    
-208   112    
256    -96    
-48    304    
128    -112   
-336   32     
304    -16    
304    592    
-144   -192   
-576   96     
416    80     
224    352    
-112   224    
-272   -96    
-240   -192   
1056   1072   
496    -2032  
-2368  -816   
304    -256   
1024   304    
320    80     
-656   528    
192    656    
-816   736    
448    -304   
608    240    
-64    80     
-320   48     
-32    288    
304    -240   
48     160    
-32    48     
64     256    
-240   80     
224    32     
160    448    
32     1088   
64     352    
-64    256    
368    -832   
64     192    
-48    32     
-400   80     
288    1008   
416    816    
-128   -32    
-256   -320   
96     192    
304    176    
16     -80    
-112   -304   
-96    32     
64     -128   
480    -208   
80     592    
-128   160    
160    -496   
-320   16     
-16    0      
-80    -784   
336    1136   
48     48     
-320   416    
288    -32    
-32    -224   
128    448    
-160   -128   
-368   -896   
608    32     
48     -224   
-720   -896   
528    160    
-288   144    
-240   -272   
-48    208    
96     -48    
320    -240   
-144   -16    
-16    288    
-64    32     
-400   -48    
96     256    
-48    96     
32     -112   
480    -176   
32     160    
112    48     
96     -48    
48     128    
32     -48    
0      64     
112    -336   
64     224    
-336   32     
176    336    
128    16     
-160   80     
336    784    
400    352    
-304   -96    
0      336    
-208   -80    
384    208    
-224   624    
-64    160    
304    -304   
288    -464   
-32    256    
96     16     
-64    112    
224    -96    
144    16     
-80    272    
-16    80     
-224   48     
96     -32    
-192   -320   
928    -896   
-240   624    
16     -272   
-208   336    
192    -32    
-64    -16    
192    -416   
-80    -64    
176    -48    
80     0      
-96    96     
336    -32    
-64    96     
96     -496   
0      -160   
176    -576   
-48    -192   
304    -816   
32     416    
160    -32    
-80    -48    
64     -96    
416    -48    
-128   -16    
112    192    
112    64     
-288   -2176  
480    -176   
-112   64     
1360   352    
-1792  688    
-592   -208   
1696   -560   
-592   -576   
-1344  -416   
432    -208   
-128   -144   
352    -208   
80     560    
96     496    
-208   512    
144    64     
128    -128   
16     -80    
-320   -544   
160    -176   
208    -912   
16     -112   
-240   -224   
224    48     
-720   -880   
1392   -480   
-320   -848   
80     1888   
1520   416    
-1008  368    
1136   288    
-848   176    
-400   -240   
544    -96    
32     -64    
-160   80     
-192   -608   
64     -1040  
400    112    
-160   -256   
-160   -160   
80     -112   
32     -32    
304    -464   
-48    16     
-304   -560   
656    96     
-864   -96    
80     -304   
576    304    
-848   208    
-112   -336   
-80    -16    
608    416    
-336   -2384  
-256   -48    
-96    -304   
96     -80    
320    -48    
208    -640   
64     608    
176    96     
-688   -48    
64     -48    
-32    -32    
272    -32    
160    192    
64     -368   
-240   -48    
320    -1952  
64     144    
-208   32     
-416   -1056  
1008   -2496  
-2160  -752   
-64    96     
912    -288   
672    -256   
-496   80     
-720   -208   
384    400    
-32    -240   
384    -624   
-400   -256   
256    -416   
-144   -48    
112    304    
208    -176   
-272   240    
-96    -96    
0      48     
608    736    
-736   496    
336    368    
32     -112   
-352   64     
-1872  -160   
656    48     
384    -96    
-432   144    
304    -304   
-32    -528   
240    80     
-32    160    
16     -80    
272    16     
-208   -176   
496    272    
-32    -272   
32     32     
288    -336   
-224   80     
528    0      
-368   128    
144    -368   
368    240    
-80    -864   
272    272    
-640   112    
592    80     
-176   16     
-128   -128   
160    -160   
96     -96    
304    864    
-448   288    
-64    464    
992    -176   
-800   160    
80     -80    
400    64     
-96    -64    
288    96     
-96    144    
48     48     
-160   144    
64     128    
48     -80    
-64    80     
80     960    
160    784    
-576   -80    
400    -480   
-128   128    
-64    -16    
400    256    
32     -32    
-464   -64    
-336   -32    
-496   -400   
32     208    
-288   496    
112    96     
-352   -1344  
1792   784    
-336   624    
-864   320    
-80    320    
-416   -64    
-112   16     
448    -528   
-368   -560   
-688   288    
160    -16    
-64    -240   
-144   352    
-1232  -240   
96     -32    
256    176    
-96    -32    
-272   -288   
-352   144    
-80    -112   
304    144    
-480   -848   
512    -432   
-320   416    
-480   64     
464    144    
112    16     
-336   160    
64     -256   
-32    144    
-112   -32    
192    112    
-64    -80    
-240   384    
384    -48    
-304   144    
-32    -48    
48     -112   
-320   0      
432    -176   
-192   48     
-96    -112   
-80    224    
-112   -144   
-32    224    
-384   -240   
-80    192    
320    -272   
-80    192    
-80    32     
-272   320    
2592   112    
-2544  688    
-512   -64    
1312   64     
-816   -160   
-64    -64    
416    -112   
-112   -176   
-256   -176   
-48    32     
80     144    
-144   -32    
192    128    
-192   128    
656    224    
-544   48     
176    48     
-144   48     
384    496    
176    112    
-240   -400   
832    240    
-1440  -112   
1024   -288   
400    528    
-368   720    
-192   -144   
160    0      
128    96     
-96    -80    
-416   192    
-288   -144   
624    0      
-80    0      
304    144    
-336   112    
64     -64    
224    -352   
-272   304    
0      128    
-16    256    
-208   288    
-176   -352   
-304   176    
-512   -16    
416    -336   
928    896    
80     -96    
-160   96     
432    -32    
-528   96     
112    240    
-304   80     
-112   -320   
240    -176   
32     -96    
-416   -400   
208    608    
224    160    
-640   -848   
0      176    
240    80     
-80    -80    
224    320    
-48    -224   
64     272    
512    224    
128    176    
-112   400    
-416   16     
-80    -2096  
-1488  -512   
272    192    
-336   -192   
528    -176   
16     -576   
-608   -528   
-480   -1536  
624    -928   
-144   128    
-128   256    
-80    -384   
32     416    
320    176    
-304   288    
-48    512    
-96    144    
-96    224    
336    80     
-144   352    
16     224    
-112   -96    
592    0      
-384   288    
224    704    
0      368    
-112   400    
-176   528    
64     352    
320    544    
-304   80     
-336   -224   
-192   -656   
96     32     
400    1072   
112    1040   
-288   400    
320    -128   
16     -464   
-80    864    
-128   -16    
-240   416    
128    -240   
176    640    
-272   352    
96     -208   
-80    -432   
-320   -400   
416    640    
-96    96     
-320   -288   
912    -192   
-944   1104   
240    0      
-192   -112   
-384   -576   
-48    368    
256    1680   
240    1072   
-128   384    
-32    -288   
16     112    
192    -400   
32     -176   
144    0      
-144   224    
-32    352    
-16    240    
-144   64     
160    80     
176    -48    
-64    -16    
-176   -32    
80     -48    
-16    -448   
-128   160    
256    352    
-208   224    
-80    320    
128    224    
-16    160    
0      928    
192    240    
-96    -16    
0      336    
176    240    
-80    560    
112    240    
240    480    
-80    256    
144    -480   
176    -48    
-112   80     
-80    192    
176    64     
-160   80     
-48    -288   
272    -208   
160    32     
-80    144    
-160   432    
160    -16    
-272   352    
848    -16    
-688   0      
-64    96     
-128   -112   
336    -16    
288    800    
208    -192   
-576   -576   
224    0      
272    608    
96     -592   
64     368    
-592   -320   
256    128    
208    -64    
224    -208   
-256   144    
-48    -592   
128    96     
128    368    
304    16     
-224   -80    
-240   112    
400    112    
128    192    
-256   -144   
320    288    
192    -608   
-1984  160    
1296   -144   
-704   -544   
0      288    
-112   -368   
-80    -208   
160    -272   
-320   80     
288    -112   
-208   0      
112    112    
16     96     
32     -32    
144    80     
-16    128    
32     -80    
192    160    
128    -304   
-224   64     
112    -112   
368    432    
-1504  720    
768    0      
-64    -1040  
368    -480   
-640   -240   
512    688    
-784   256    
192    -192   
192    0      
-352   96     
160    48     
80     0      
-80    112    
448    -240   
-320   144    
32     -368   
-112   128    
128    64     
-144   160    
64     96     
416    -416   
-496   544    
48     -352   
-256   -192   
544    -352   
720    -496   
640    688    
-736   720    
-208   -128   
128    0      
416    -336   
208    48     
-160   272    
-144   880    
848    432    
432    -64    
-512   -224   
352    -208   
128    -224   
368    -448   
304    368    
-176   -576   
-48    128    
176    -624   
784    0      
-176   -16    
-176   48     
1072   496    
80     1456   
-3200  -16    
2208   -848   
352    -64    
-704   -16    
-240   384    
560    -128   
-304   320    
176    -240   
352    -112   
-16    112    
96     -64    
-304   -64    
-16    224    
-96    -416   
496    320    
16     48     
-560   -1280  
352    192    
320    -1104  
-256   80     
656    -160   
-448   -224   
-624   -208   
-352   -160   
432    272    
0      336    
16     0      
-240   48     
160    -128   
576    -592   
-240   128    
240    96     
-320   304    
-640   -576   
16     -256   
448    -64    
-592   -496   
880    -256   
-80    -800   
32     -48    
64     -480   
-144   0      
336    -128   
-144   16     
112    -432   
-656   -448   
544    -208   
128    112    
-128   432    
-128   224    
384    1216   
-464   368    
80     -240   
32     -784   
-544   -304   
192    -96    
528    -80    
-16    352    
-240   160    
192    0      
256    -32    
-240   -96    
64     -96    
48     48     
80     -16    
-624   -144   
-80    -272   
128    -144   
-208   32     
320    272    
384    -336   
-208   -224   
-176   -2784  
16     256    
368    -32    
80     208    
-336   -240   
16     80     
-16    -64    
-192   48     
1072   1856   
1008   -320   
-2016  336    
832    -64    
48     0      
0      -80    
-160   16     
64     -1264  
240    -608   
-176   112    
352    224    
16     -48    
-96    80     
-128   -464   
320    -400   
-368   544    
352    -80    
-416   0      
-16    96     
144    16     
-272   -1232  
496    32     
160    432    
-912   176    
672    -384   
0      0      
192    -64    
-192   336    
176    48     
16     48     
-32    80     
-64    -176   
-80    320    
272    -176   
-976   64     
96     -240   
-48    256    
112    -160   
80     368    
80     -528   
-128   -64    
-32    -32    
112    32     
16     80     
-128   -208   
-320   16     
352    -288   
-208   80     
-64    -208   
-544   -960   
2000   -848   
-1552  48     
624    -560   
592    288    
-848   -1520  
544    160    
-64    224    
304    224    
0      16     
-160   48     
32     16     
-16    0      
-48    -32    
-80    208    
496    336    
-224   -96    
-32    48     
64     -224   
352    112    
-96    112    
432    464    
-1584  960    
688    -176   
-352   592    
416    96     
-96    0      
80     -304   
384    48     
-16    32     
-176   -528   
-624   -240   
-32    192    
-208   -160   
128    32     
208    96     
-752   -16    
-272   624    
-112   -32    
0      -112   
144    128    
-224   208    
32     368    
-176   176    
-640   -336   
432    672    
-752   176    
-752   -1568  
160    -1824  
256    -720   
-672   112    
160    160    
-64    208    
80     -64    
400    96     
80     192    
-304   576    
352    -992   
-48    144    
208    -48    
64     -176   
-16    -64    
64     240    
16     64     
-64    96     
32     336    
48     -448   
16     32     
144    160    
64     192    
-288   192    
-544   -1984  
-2048  176    
1056   672    
-384   -224   
16     -256   
128    256    
-608   400    
336    -288   
288    640    
288    -800   
-400   560    
-112   112    
80     -352   
112    -112   
-480   -128   
-320   224    
-304   -64    
-160   -256   
-144   -720   
48     -112   
64     880    
176    -112   
-928   -128   
176    -224   
656    -912   
-160   -16    
48     -400   
-288   -768   
-160   576    
224    -48    
128    224    
-208   -400   
-272   288    
16     -336   
-144   -432   
-32    -96    
176    448    
-32    272    
-96    -240   
240    0      
-96    240    
-304   -496   
64     -352   
32     0      
-272   -608   
48     -48    
-384   224    
-448   -1360  
-432   32     
224    -160   
-32    688    
48     -544   
-704   -16    
576    -240   
-272   80     
-368   272    
-352   -48    
352    -480   
0      192    
-48    256    
-192   64     
-208   16     
320    32     
96     48     
-272   96     
80     -416   
144    16     
-272   -128   
448    208    
-112   240    
-112   64     
16     80     
160    -16    
-256   384    
-96    672    
-160   304    
176    976    
-80    496    
-384   -192   
192    -704   
192    -112   
-1392  656    
752    -528   
192    -464   
240    -432   
16     -480   
-160   16     
48     736    
-48    864    
192    -176   
32     -320   
-192   -240   
-16    112    
16     0      
0      48     
-16    336    
-32    320    
-96    -160   
128    -144   
80     64     
144    -240   
-976   992    
864    -512   
-144   944    
32     368    
-384   -880   
48     64     
128    128    
-112   48     
-32    -32    
-16    -32    
16     -80    
-32    544    
208    -96    
-64    96     
-48    112    
-144   304    
320    160    
-16    192    
-48    96     
112    176    
-224   96     
-176   112    
208    -64    
-96    -128   
128    32     
208    112    
-64    128    
48     160    
144    96     
-544   688    
1536   0      
-976   -336   
544    -96    
704    80     
-1040  160    
256    336    
400    1136   
-192   48     
192    352    
-192   -80    
96     112    
-160   -176   
496    176    
-224   -144   
-48    192    
96     32     
-160   -32    
0      0      
-64    -32    
48     144    
-288   -560   
-1008  816    
1712   64     
-1264  -32    
400    64     
416    128    
-480   -176   
608    16     
-512   160    
464    -80    
-272   160    
16     112    
-352   16     
64     128    
640    96     
-176   272    
-288   -288   
32     0      
-176   144    
-368   256    
304    432    
-928   288    
672    -160   
-240   272    
-96    -64    
528    -480   
384    64     
112    -416   
288    -368   
688    240    
-640   208    
176    -528   
64     256    
-320   112    
224    64     
144    496    
192    288    
240    544    
-336   16     
-624   80     
48     192    
192    -32    
112    -112   
-704   -128   
544    -464   
64     256    
-848   -32    
224    144    
-560   -1056  
-1696  1808   
944    -592   
-1408  288    
544    -512   
432    176    
208    384    
-928   16     
-112   -176   
832    48     
656    -32    
0      -16    
-384   144    
96     -32    
208    80     
96     -816   
-288   32     
96     96     
-112   112    
704    752    
-640   368    
-128   64     
656    -400   
-240   80     
752    128    
-752   48     
560    336    
80     272    
-384   -240   
528    -32    
96     -192   
-160   128    
272    160    
-432   -112   
272    160    
448    176    
-496   240    
480    64     
-240   160    
-32    -80    
80     96     
96     -256   
96     -144   
176    16     
48     336    
352    -448   
-864   -240   
448    -1776  
96     -16    
-192   0      
80     144    
16     160    
-272   -816   
-144   160    
416    944    
-416   256    
272    144    
32     80     
-256   16     
160    -208   
-32    -928   
16     272    
48     -64    
-80    48     
176    96     
-32    80     
80     176    
-224   48     
0      128    
96     -176   
-240   384    
240    32     
64     64     
48     -1536  
-16    176    
0      -352   
0      -48    
224    64     
-144   656    
352    464    
0      336    
-208   288    
96     -1536  
-960   720    
1936   240    
-1312  592    
0      -464   
256    384    
672    176    
-288   288    
-384   0      
208    288    
224    -560   
208    176    
-160   32     
-64    608    
80     128    
-32    -416   
224    128    
-144   -144   
0      -304   
176    64     
368    1968   
-256   608    
-272   -736   
96     -752   
224    -80    
-176   208    
-16    -352   
96     -416   
0      -336   
128    64     
-512   32     
48     -672   
-96    -96    
256    -2400  
16     -64    
32     -224   
128    -736   
16     -176   
-96    -496   
48     -592   
128    192    
16     -368   
-64    144    
0      -512   
0      384    
-48    112    
-272   -272   
208    -48    
176    496    
992    1536   
-368   -576   
-1760  -640   
1968   -1392  
-32    80     
-480   -160   
784    -352   
-480   -1072  
0      448    
128    240    
160    -32    
-240   -144   
-16    144    
512    256    
-432   16     
16     112    
592    -176   
-80    -400   
-208   -1584  
272    -960   
-32    -192   
-672   -528   
640    -160   
1344   224    
-1536  480    
304    -144   
464    -848   
-400   -592   
-288   -448   
96     -480   
80     -304   
-160   -288   
176    -80    
96     -160   
-224   -352   
208    -2848  
80     144    
-304   -448   
128    -624   
192    -544   
-32    -192   
-192   160    
0      -128   
-208   1056   
-96    1136   
-48    1648   
-16    880    
432    1312   
-224   720    
48     816    
688    -1136  
-496   48     
144    720    
400    880    
-256   -608   
-464   160    
16     112    
0      1088   
880    784    
-320   128    
384    352    
-128   304    
-608   112    
32     -688   
208    -16    
32     -432   
352    432    
-160   -288   
0      512    
336    464    
64     -448   
-1456  -704   
-432   944    
656    544    
-1008  288    
688    -112   
0      -1232  
-224   896    
-192   1584   
384    -128   
800    -544   
-128   352    
-112   -336   
-16    800    
-128   -752   
352    -144   
128    128    
-32    -64    
-288   128    
128    208    
80     448    
128    -320   
32     16     
112    -448   
-592   480    
688    -48    
96     464    
-224   192    
-256   -880   
-336   -1120  
496    464    
-48    256    
-128   48     
144    0      
32     16     
-384   -48    
432    -64    
80     -160   
-832   -1456  
368    144    
496    416    
-272   -64    
-64    112    
-112   0      
-48    80     
240    -1072  
-64    -336   
-80    -256   
96     624    
32     576    
-32    -368   
-368   -128   
304    -96    
-656   -640   
144    288    
-720   48     
-560   -544   
16     -272   
208    848    
-112   1168   
-608   512    
-80    -128   
32     -96    
-144   -144   
16     48     
0      -16    
-240   96     
32     -128   
-544   -304   
32     32     
384    48     
-256   240    
80     256    
-272   80     
-368   144    
320    -160   
-272   96     
-336   -320   
32     160    
176    384    
-16    160    
-464   -2448  
-16    -240   
160    -544   
-272   1088   
784    272    
-640   256    
288    496    
-272   -256   
16     -832   
-240   -512   
16     -128   
-240   -256   
-64    96     
-752   128    
64     320    
-160   -176   
-48    -352   
-64    -736   
0      16     
240    32     
208    688    
-976   48     
736    112    
-32    16     
-368   -160   
256    -144   
-448   64     
112    544    
-64    -160   
80     384    
-64    -160   
-160   -32    
0      -192   
80     32     
-352   80     
96     192    
80     -16    
16     112    
-96    -128   
-32    160    
16     80     
-336   32     
272    144    
-192   -160   
256    -64    
-240   -160   
-400   48     
336    -16    
-48    208    
-768   448    
-784   -480   
4560   720    
-960   48     
-1328  176    
944    16     
0      416    
-640   -32    
464    128    
-96    -480   
-320   160    
48     -240   
0      160    
-32    -80    
416    112    
-48    -80    
-64    144    
96     112    
16     48     
-192   96     
-224   -32    
176    96     
-592   -624   
-240   512    
1104   -672   
-416   -32    
-816   64     
848    288    
-48    -96    
-928   80     
368    80     
-128   144    
112    112    
0      64     
80     384    
-80    -160   
-608   224    
608    272    
-464   208    
-112   16     
320    128    
-96    -144   
-32    -160   
624    112    
-752   -256   
480    112    
352    -592   
-640   -432   
624    160    
-448   -160   
-144   -160   
480    -80    
32     128    
-416   -208   
-272   32     
192    48     
176    -496   
-240   -160   
80     176    
0      -288   
-96    -96    
-160   192    
64     -80    
0      160    
-256   96     
-160   -48    
288    752    
752    -16    
-656   32     
-336   -32    
1216   1760   
-2944  1728   
400    64     
816    416    
-2224  -240   
432    288    
1296   128    
-416   48     
-768   144    
480    -16    
384    32     
288    176    
-480   -176   
32     272    
-144   -96    
448    368    
-240   -112   
-368   272    
160    -64    
32     288    
624    -528   
-688   208    
672    -80    
-720   48     
224    176    
112    -16    
-288   176    
224    -224   
-304   -128   
448    -240   
-128   -272   
-48    16     
80     160    
192    32     
208    64     
-272   240    
272    128    
112    128    
400    -192   
112    -64    
16     -16    
32     128    
-320   144    
544    192    
-224   176    
304    -48    
96     16     
-32    -96    
-192   -336   
16     -64    
224    48     
-128   144    
192    -240   
-800   352    
912    1584   
-608   1728   
496    336    
-160   -400   
-16    128    
176    -32    
176    -80    
16     -160   
0      -32    
-32    112    
-64    -112   
-160   -128   
80     -16    
272    -80    
64     -96    
-64    -16    
48     0      
-48    480    
192    -304   
-256   704    
416    880    
-32    -384   
320    -448   
-384   -416   
-80    -48    
80     832    
272    464    
-288   -304   
912    672    
-544   80     
-336   -976   
400    528    
32     256    
224    896    
-320   1104   
160    -384   
-128   672    
96     32     
144    -240   
-32    256    
-112   -192   
144    208    
-16    336    
-64    304    
32     -32    
96     208    
-128   96     
-128   416    
272    768    
304    -144   
-752   -544   
208    -528   
48     288    
560    -1776  
-608   -672   
-96    320    
0      400    
-112   256    
128    -112   
-16    -864   
-16    176    
112    -192   
240    224    
0      64     
-32    208    
-240   288    
512    -1376  
-48    -352   
-336   272    
112    240    
96     336    
-112   -112   
256    -320   
-80    192    
96     -80    
192    160    
32     144    
-544   -1024  
2336   -560   
256    768    
-1456  -864   
656    -1440  
48     -112   
-384   -784   
656    736    
-128   -1136  
-320   -176   
0      144    
448    128    
0      32     
-80    224    
-48    176    
160    -32    
0      112    
0      176    
-112   -48    
-304   128    
160    112    
-400   -2064  
160    -416   
32     -1120  
-592   -560   
736    -592   
-416   -656   
16     320    
144    -1120  
-432   -992   
160    128    
352    1136   
-32    112    
-240   -304   
192    -560   
-512   144    
144    96     
32     16     
336    64     
416    64     
-448   0      
16     192    
112    -448   
-416   -16    
432    544    
432    -528   
-368   -288   
592    800    
-1376  1376   
-144   208    
64     -352   
-288   -880   
240    -240   
-160   -16    
704    -32    
-1232  704    
80     -416   
-576   -992   
80     -976   
304    -912   
-640   160    
224    -1728  
-128   -512   
224    -464   
16     -96    
-48    304    
224    208    
336    416    
80     368    
-272   -464   
240    192    
0      2080   
800    -144   
-1520  -1024  
304    -1232  
864    0      
128    -224   
96     1120   
-480   2192   
-64    -400   
608    -176   
16     -320   
-448   480    
208    416    
256    -416   
432    -96    
80     -16    
-144   384    
112    32     
256    -32    
96     -368   
-304   -528   
-16    -208   
592    -192   
-160   432    
256    -2592  
-128   -816   
-448   -704   
240    96     
-320   -592   
320    -16    
48     208    
-208   240    
112    -336   
-416   144    
224    464    
-16    112    
-48    -288   
304    528    
16     416    
224    -96    
64     160    
-32    144    
96     -16    
-368   -288   
176    -224   
-128   144    
64     -192   
-416   -80    
464    432    
-480   272    
-64    -608   
432    -496   
-816   272    
112    48     
512    192    
-304   -48    
320    -1552  
-128   -528   
304    -432   
-80    -240   
-240   -48    
240    16     
16     -336   
-192   -512   
-128   -96    
48     432    
-224   128    
-80    272    
160    -32    
128    288    
-48    -48    
112    -320   
-32    -16    
-112   48     
0      32     
272    512    
464    224    
-656   80     
16     -208   
144    -96    
-400   736    
-288   -736   
-768   416    
0      -368   
272    -224   
368    -112   
-528   -384   
176    80     
304    -256   
16     160    
-112   16     
-160   -128   
-176   32     
128    -400   
0      -224   
416    560    
-496   -16    
-224   -384   
240    -304   
32     -272   
784    1232   
-1264  496    
592    0      
176    -592   
-480   -192   
720    -208   
-288   368    
-144   0      
16     224    
288    -96    
-336   -112   
-176   64     
192    -272   
32     64     
64     -128   
208    80     
-240   -464   
112    128    
-368   -48    
224    176    
0      32     
-256   48     
-96    48     
80     -16    
208    -64    
-560   -64    
608    0      
-480   -48    
176    112    
-176   -1200  
976    -1632  
-368   -240   
448    288    
-240   -64    
-352   96     
-128   192    
-448   336    
-112   192    
32     -96    
-48    -64    
-240   -32    
416    192    
-1056  -144   
96     192    
432    -80    
-320   160    
-320   -128   
256    -16    
192    112    
-336   96     
-32    144    
-928   -512   
1456   -64    
-16    -192   
-1424  80     
2240   48     
-416   128    
-288   0      
848    208    
-384   -320   
-208   176    
48     112    
32     -16    
-128   32     
-32    -64    
240    32     
-256   -16    
-64    0      
-32    128    
16     112    
-112   32     
208    304    
-112   -592   
-992   336    
1264   -48    
-656   352    
-416   -16    
384    -368   
32     -368   
-448   576    
64     160    
48     -144   
144    -416   
-256   64     
-320   -256   
-1104  272    
688    32     
-480   64     
352    32     
-64    -480   
-288   64     
144    32     
-288   16     
208    128    
48     208    
64     64     
-848   368    
256    32     
-368   -48    
736    1056   
-1904  4320   
1200   -368   
-1360  -288   
-384   -368   
1296   -432   
-368   272    
-512   32     
-48    256    
208    384    
-576   112    
160    -80    
304    0      
-576   16     
144    -32    
128    224    
16     -96    
-224   128    
-640   -80    
512    560    
-816   736    
384    192    
96     -272   
-256   -240   
752    336    
-448   -32    
-112   560    
368    -16    
-128   -64    
-160   -96    
16     -368   
-80    16     
208    32     
-288   -224   
32     80     
-272   208    
528    1136   
-640   432    
64     -240   
320    -96    
-240   -16    
-80    144    
-144   256    
384    416    
-128   -304   
-416   -480   
416    -320   
-480   -608   
-288   -32    
128    560    
-32    448    
128    -16    
-240   672    
672    -272   
-480   -256   
320    -128   
-176   -48    
-704   -1792  
-352   -1568  
0      -1456  
-336   -944   
32     -752   
-112   -272   
32     304    
32     208    
-32    -48    
16     -256   
-32    320    
-64    -16    
112    16     
32     -64    
48     480    
96     352    
-160   208    
208    16     
-80    48     
96     64     
-176   -304   
0      256    
-48    -64    
32     272    
16     48     
-144   1008   
-160   240    
-224   -576   
-208   -448   
192    80     
-16    -480   
160    -1200  
128    -208   
80     144    
-128   -208   
48     -16    
16     -96    
-32    -16    
144    -272   
192    96     
-64    416    
-48    368    
-192   368    
112    208    
-16    -32    
336    320    
368    112    
-1072  -64    
688    -256   
-224   -192   
80     192    
160    48     
-144   304    
-176   240    
96     192    
208    -240   
160    -128   
-16    352    
-16    464    
80     -96    
304    -160   
-80    -96    
-272   -288   
272    -16    
288    -16    
-96    320    
32     96     
-16    144    
-80    -32    
304    -176   
80     0      
-32    128    
192    -16    
-32    80     
-272   -400   
1760   -832   
-1664  576    
752    560    
944    832    
-912   688    
0      400    
816    960    
-640   -80    
16     -960   
-48    464    
128    208    
128    -32    
224    240    
-368   192    
48     176    
48     -352   
176    -416   
0      -32    
-112   144    
16     64     
-416   -656   
-640   800    
1808   -336   
-848   544    
704    368    
0      -688   
-720   -400   
128    512    
272    1152   
-32    208    
224    80     
-240   -208   
32     -208   
16     -336   
240    208    
192    -688   
-32    656    
608    912    
16     416    
-160   -128   
48     112    
-176   128    
208    -224   
-496   -128   
576    1088   
-448   448    
640    1600   
-1360  1312   
32     464    
544    -320   
-400   -704   
336    112    
-400   144    
-32    16     
560    736    
544    -288   
-112   -32    
-432   656    
-192   -304   
704    416    
224    -64    
-352   -112   
256    128    
160    80     
512    880    
-592   272    
-336   -96    
832    -1104  
-96    144    
-864   -752   
1312   -400   
1200   240    
-1456  -368   
-256   -2032  
128    -832   
688    -208   
-208   368    
-496   720    
208    320    
224    288    
-48    -352   
-176   48     
-128   560    
352    -16    
192    -272   
-128   0      
160    64     
-224   -400   
256    -992   
-32    208    
32     448    
32     384    
320    -176   
-480   -224   
368    304    
160    -432   
-144   -400   
16     -208   
320    160    
-272   -16    
160    64     
-80    -64    
112    624    
64     304    
-304   176    
176    688    
544    128    
-384   224    
368    144    
64     80     
80     -64    
256    288    
-496   -528   
-48    144    
336    64     
-96    -48    
-64    -144   
112    -128   
-96    -112   
256    64     
-112   -320   
512    -112   
128    352    
-320   -272   
336    48     
-240   -32    
-64    -80    
320    -16    
-128   -48    
112    0      
-176   288    
144    0      
224    112    
-224   160    
-32    -80    
416    -352   
-80    80     
-96    -208   
432    -768   
-336   336    
16     -416   
272    32     
-64    144    
80     240    
32     -96    
16     -544   
64     -32    
16     -240   
48     96     
160    -64    
-176   -2560  
-1024  1168   
1424   -1104  
-656   160    
528    -176   
96     -272   
-304   -144   
-352   64     
656    448    
128    -320   
-64    -1088  
-368   128    
144    -592   
336    -128   
-544   416    
-48    -352   
240    -128   
-192   -272   
176    -64    
48     -112   
592    1104   
-1440  32     
112    -256   
1200   -16    
-672   -32    
320    192    
-448   336    
144    -112   
0      -80    
48     -176   
-496   -384   
-64    -320   
-208   48     
704    -176   
-144   -192   
-112   -32    
48     -848   
80     144    
64     -240   
-304   208    
160    -16    
-64    80     
128    -144   
-48    48     
-96    -80    
-512   96     
-752   -112   
-32    160    
32     -80    
-464   -1216  
2240   4048   
2624   -1488  
-2256  16     
-288   -432   
-176   48     
672    176    
112    -16    
-320   624    
608    -112   
-496   288    
352    -176   
144    160    
128    -256   
-160   240    
576    -208   
-304   128    
144    -864   
32     272    
48     -1168  
224    144    
32     32     
-672   -304   
912    -592   
-336   -544   
192    -464   
-704   -48    
816    -320   
-832   240    
-1280  -224   
288    -112   
-128   -48    
288    -272   
-80    176    
-144   -1008  
96     288    
512    -80    
-128   96     
-128   -144   
-112   -48    
-48    -16    
272    -16    
-352   -176   
592    -16    
-736   80     
656    -64    
-144   -144   
-496   -48    
208    -160   
32     -800   
32     208    
96     64     
-240   -144   
432    -240   
16     288    
-464   256    
752    -464   
-256   64     
16     96     
240    32     
-32    -192   
128    0      
64     -240   
-144   112    
160    -128   
-32    -16    
448    0      
-400   -112   
-592   -80    
336    -48    
-496   -816   
-1440  912    
112    432    
-944   -304   
-288   -192   
1488   -336   
-416   -1136  
-720   320    
672    48     
-384   -176   
208    128    
-352   96     
400    160    
-848   224    
448    -208   
-16    32     
224    -240   
-528   128    
336    16     
-464   784    
192    1280   
144    352    
-896   -288   
-304   -352   
256    32     
-1024  112    
-272   96     
-96    16     
-528   -464   
224    -720   
-320   -576   
32     608    
-32    400    
-128   -336   
256    -192   
-384   -176   
160    336    
-336   192    
80     272    
128    -192   
-400   -96    
48     -400   
32     -608   
-560   -480   
-464   -1216  
-240   -1072  
304    -784   
-176   -496   
576    -432   
64     480    
-384   -80    
48     64     
-304   -1008  
896    -96    
-400   -512   
-496   -336   
656    -288   
-80    -352   
160    1152   
-464   848    
304    -912   
-160   608    
-144   112    
-528   96     
-208   80     
-272   -128   
224    32     
0      96     
-80    144    
240    304    
-96    -16    
32     48     
144    -112   
48     96     
16     16     
0      64     
32     -32    
64     320    
-304   -208   
240    -16    
-224   -48    
16     128    
-48    -544   
224    -224   
-240   208    
-608   32     
224    208    
240    -32    
-96    -176   
-224   -192   
-272   160    
-240   0      
304    -96    
-608   -176   
-208   224    
176    -64    
208    256    
160    -96    
-352   160    
-256   272    
144    144    
-96    -192   
528    -112   
144    240    
-752   0      
448    -224   
-448   -176   
272    640    
-32    944    
128    528    
-544   -240   
-240   -32    
16     -224   
352    -224   
0      336    
-144   160    
32     -16    
-112   -32    
160    -224   
-240   -496   
-32    -16    
-32    144    
-80    64     
-128   -128   
240    -128   
-800   -432   
128    -224   
320    128    
80     160    
-208   32     
-192   64     
-160   -400   
1392   -896   
-1808  160    
864    528    
240    352    
-736   -784   
624    -1504  
416    16     
-224   2240   
64     16     
-112   -544   
-144   -128   
352    -16    
64     -176   
-448   96     
208    160    
304    464    
96     816    
-128   1136   
32     -288   
-64    -448   
-816   -832   
1424   -416   
-80    -800   
-880   160    
256    384    
-128   288    
-112   304    
-48    -240   
144    -240   
96     -464   
256    240    
-96    0      
128    -16    
-416   -96    
384    384    
560    -112   
-496   304    
144    16     
-320   112    
176    -128   
48     16     
-16    272    
-16    -784   
1696   -720   
480    336    
-880   -192   
432    272    
128    -640   
-304   368    
560    272    
48     128    
-368   -160   
16     -432   
16     272    
304    688    
896    -176   
-496   -496   
416    224    
208    432    
16     -384   
-336   160    
432    -16    
0      224    
-176   336    
-208   -784   
-112   304    
224    0      
-448   80     
-304   240    
208    -1424  
1584   -2160  
432    272    
64     320    
-864   352    
-112   320    
784    480    
224    512    
-656   320    
192    160    
-128   -192   
176    160    
-48    -160   
-160   352    
208    64     
96     224    
-160   16     
48     64     
-528   -432   
736    -1344  
-240   -160   
224    192    
-96    368    
-832   -64    
624    112    
144    0      
-240   144    
-128   64     
128    80     
-96    -16    
480    208    
-272   64     
-144   224    
688    240    
-336   320    
-192   16     
256    -176   
-48    -448   
48     192    
48     176    
80     160    
-112   32     
96     288    
64     0      
-288   176    
112    32     
96     -176   
-176   48     
144    32     
-64    64     
160    96     
-32    112    
432    -192   
-704   592    
528    256    
-112   -16    
-368   -400   
-144   -112   
368    -448   
192    224    
176    48     
-80    144    
112    160    
-112   -64    
0      0      
160    192    
-32    64     
96     0      
16     208    
-128   144    
32     192    
-32    -368   
176    -16    
-112   -368   
224    -160   
-208   400    
-96    -80    
224    -192   
-160   272    
64     16     
128    64     
-848   320    
1968   -832   
-736   64     
-592   -624   
608    528    
432    -224   
-304   288    
-416   -736   
400    -288   
160    -208   
16     -80    
48     112    
-112   160    
16     0      
208    -176   
-96    400    
112    -304   
-16    -400   
128    80     
64     176    
-192   -1232  
-16    160    
128    -208   
-240   160    
512    -352   
-192   -576   
-112   368    
112    432    
-272   48     
272    80     
16     -48    
0      -128   
-208   144    
240    0      
224    176    
0      32     
-352   272    
16     -96    
384    80     
-96    -384   
32     32     
-32    -1248  
-80    144    
64     144    
-16    48     
352    208    
-336   128    
192    48     
-96    -64    
656    -192   
368    -176   
-1328  400    
1248   -32    
448    240    
-1024  -320   
64     256    
272    -672   
96     -656   
-144   -144   
192    80     
-288   288    
0      32     
112    208    
-80    -864   
480    272    
-304   -224   
64     160    
-16    -240   
304    -64    
32     -80    
-384   -416   
1184   128    
-1168  224    
416    -784   
-208   64     
0      -432   
224    -176   
256    128    
192    -288   
-272   144    
-96    -64    
176    144    
224    -64    
-128   -48    
240    -144   
-144   192    
64     0      
224    -1184  
-96    384    
208    -720   
-192   64     
-64    208    
-288   -336   
-368   -32    
-384   -1008  
912    -432   
0      -624   
-256   -144   
224    112    
416    224    
-496   -384   
-592   -240   
1088   -176   
-64    528    
-832   -352   
752    -672   
-208   -16    
208    208    
-192   -192   
-16    -192   
176    -256   
128    -1568  
-48    -80    
-32    96     
-224   -192   
624    -144   
320    16     
-192   -416   
-208   -416   
752    -784   
-1392  -768   
-368   432    
-288   -96    
240    -672   
528    -272   
416    -1392  
-176   448    
-368   208    
-112   -304   
608    -688   
-224   -832   
-64    112    
-112   384    
352    224    
-80    -304   
-96    144    
-272   -192   
-64    -16    
-464   512    
80     256    
-64    -48    
-32    -352   
-96    -112   
608    -112   
80     592    
-96    176    
0      352    
480    1488   
240    464    
-80    -448   
-48    -544   
-128   48     
-48    288    
48     -432   
64     304    
-128   400    
-128   -528   
256    320    
160    1232   
-16    -320   
-272   -1728  
32     336    
160    128    
80     160    
-176   -512   
16     912    
128    1808   
-320   448    
-240   -208   
208    -240   
-2032  -16    
-240   -784   
720    -896   
80     -1312  
-864   -736   
448    -560   
128    288    
48     1056   
64     1760   
-208   -512   
272    -736   
128    -96    
-32    -80    
-80    -176   
32     -80    
-144   240    
304    496    
-48    992    
-96    -464   
336    -160   
-80    -976   
224    -32    
-112   -16    
-32    -16    
-48    -176   
256    -768   
64     -336   
16     -320   
-288   80     
96     112    
160    -16    
-272   -464   
112    -368   
-592   -112   
240    16     
288    -432   
-16    -32    
-416   -176   
-16    -400   
16     160    
-176   176    
32     32     
80     -16    
-80    -96    
176    -224   
-224   64     
192    -144   
-48    192    
-80    64     
-48    160    
-208   -448   
832    -576   
-96    368    
-144   -64    
-160   0      
-16    -320   
320    -432   
64     -16    
-64    -272   
48     -128   
-128   80     
32     -176   
192    -128   
-160   -448   
192    -112   
-304   -320   
-272   -144   
128    -16    
-80    656    
-288   576    
-1104  64     
240    -224   
224    -288   
-144   64     
-224   -112   
240    -80    
192    0      
-112   176    
-48    -176   
64     32     
960    1472   
-192   1376   
-992   944    
928    -48    
144    -480   
-960   -160   
624    -192   
-240   -464   
-544   -176   
208    -16    
272    192    
-192   -224   
176    64     
-80    -224   
-112   208    
-16    96     
32     16     
256    -208   
-464   -448   
144    -160   
-400   -80    
-160   -960   
-592   256    
992    240    
-752   512    
-48    624    
48     -208   
96     -112   
-336   32     
-176   -320   
736    -128   
-192   128    
-208   -96    
-80    112    
176    208    
304    -48    
-464   128    
-208   64     
96     -64    
-576   -192   
80     96     
16     -32    
272    656    
-544   -448   
-256   240    
368    -464   
112    -624   
-304   -96    
496    -816   
-544   -144   
80     320    
-240   96     
-144   64     
128    -240   
-160   -208   
-128   32     
464    -704   
160    400    
-16    352    
-352   160    
64     144    
32     -32    
96     128    
-240   80     
16     144    
-64    -48    
-400   176    
80     336    
-448   96     
-656   -672   
336    -3072  
112    -3360  
224    720    
464    352    
-560   384    
-432   128    
240    -64    
704    256    
-560   -352   
224    -112   
-304   16     
176    176    
-16    -224   
256    320    
-352   -432   
464    192    
-944   -240   
-32    144    
-320   -64    
880    -304   
-496   -32    
560    160    
-112   384    
-944   -112   
96     240    
992    48     
-368   352    
-640   -48    
336    160    
208    -64    
-480   32     
-144   -128   
-32    144    
352    160    
64     368    
-528   160    
32     160    
448    128    
-224   96     
352    224    
-272   16     
288    -16    
112    -64    
-160   -32    
-32    -112   
112    -16    
384    -64    
-224   32     
-224   48     
80     48     
128    0      
112    0      
304    224    
400    -592   
-128   -560   
-272   -320   
384    -272   
224    -16    
-48    416    
-576   224    
448    240    
16     32     
-16    160    
16     80     
-64    144    
224    80     
32     -144   
-176   48     
368    112    
-112   112    
-192   64     
112    80     
0      -208   
-176   32     
32     -16    
48     336    
48     -720   
-96    -592   
-16    752    
0      -64    
176    -64    
-992   640    
1632   -1248  
-1056  -64    
-208   -352   
976    272    
-384   304    
-80    -48    
-144   64     
272    -304   
-64    -128   
0      320    
-160   -16    
16     -32    
96     144    
160    -224   
-208   368    
0      32     
160    32     
144    352    
-192   48     
688    1312   
-1440  80     
592    64     
528    -160   
-528   128    
224    128    
-288   48     
304    -112   
-160   240    
128    160    
-400   160    
80     224    
288    -128   
-128   96     
-192   -144   
0      -80    
64     48     
192    144    
-48    240    
144    112    
-64    64     
128    128    
-304   32     
0      144    
464    48     
-544   64     
368    176    
-208   64     
16     128    
-752   -368   
416    -80    
1600   -64    
-1632  -368   
1424   -48    
-544   -144   
-752   544    
848    320    
-96    352    
-64    160    
-32    64     
192    64     
16     96     
-320   32     
544    176    
-496   -16    
176    208    
112    320    
-368   -112   
400    48     
16     -384   
-288   240    
544    1104   
1280   112    
-496   400    
-416   656    
272    352    
544    -80    
-224   208    
64     128    
-240   -16    
176    128    
48     96     
32     -144   
32     128    
192    -144   
0      128    
128    144    
-64    96     
-128   -48    
416    32     
144    -304   
64     272    
32     352    
-240   304    
-400   -160   
304    -368   
-240   -176   
-464   0      
496    -16    
304    368    
-928   464    
480    -1264  
-144   336    
-64    -320   
-736   256    
496    -528   
-144   464    
576    32     
-176   -16    
-352   32     
160    -48    
336    -16    
48     -48    
-112   256    
-96    -672   
-240   928    
816    -384   
-560   -80    
0      -848   
176    -272   
1552   2256   
-1696  1088   
336    -640   
848    112    
-736   880    
-528   144    
144    -48    
576    -528   
-16    560    
-16    -496   
-32    464    
320    -336   
-16    16     
-144   384    
-384   144    
160    512    
304    576    
-80    -160   
-176   -176   
16     240    
320    368    
112    -160   
-320   -208   
160    48     
48     368    
96     656    
-16    368    
64     272    
-256   -16    
400    528    
-272   -48    
320    224    
-48    -64    
-112   160    
384    192    
-48    -128   
288    816    
-416   416    
-128   -1056  
416    -576   
-48    -64    
-256   160    
-240   -32    
320    -16    
160    -224   
-288   -192   
144    64     
80     -464   
-16    48     
-32    -816   
-64    -192   
-416   -480   
688    -1056  
-32    -944   
-192   -1424  
192    752    
208    544    
48     1904   
-224   384    
-96    -1248  
240    512    
32     16     
144    -368   
-560   64     
-304   -48    
336    32     
96     64     
208    -672   
-32    -2672  
64     -240   
224    48     
144    112    
-112   304    
64     144    
64     -576   
-192   -432   
-496   -944   
-80    -368   
112    -208   
320    -176   
-160   0      
-208   1088   
816    -496   
-352   -416   
288    400    
-176   224    
-304   224    
-192   224    
336    512    
-208   -832   
-240   -240   
160    -128   
272    -64    
-320   32     
80     -144   
-128   -144   
0      -336   
352    -64    
32     -480   
-144   -16    
-144   -928   
224    -896   
544    48     
-48    -32    
-64    -144   
-144   16     
272    -816   
320    432    
-624   -16    
-144   16     
-944   -192   
336    32     
112    688    
-96    224    
144    -608   
0      0      
64     -16    
80     256    
-288   208    
176    -96    
272    -64    
-96    192    
-64    16     
-96    -112   
144    32     
-48    96     
-272   112    
32     -112   
32     -304   
-368   -416   
976    -336   
-2272  -384   
736    -1152  
64     176    
-800   272    
1408   -112   
-896   -320   
-96    -272   
96     -80    
240    208    
-112   -16    
-80    -96    
-240   -16    
192    96     
-688   0      
416    80     
0      64     
-48    -1664  
-240   -272   
96     -176   
80     80     
512    336    
-1728  656    
704    -240   
-256   48     
-624   -336   
608    -32    
-528   272    
-16    -144   
0      112    
304    -384   
-48    48     
-144   -544   
-128   112    
240    -48    
-224   48     
-80    -48    
-176   -160   
-336   336    
-240   384    
-176   -176   
272    -128   
160    912    
-880   -64    
-400   -144   
640    288    
-16    608    
320    160    
-784   -672   
-480   128    
480    0      
-272   0      
-160   -96    
-224   -64    
512    -64    
480    272    
-416   208    
-400   96     
352    256    
-176   240    
112    -176   
416    160    
-928   -128   
-32    -80    
704    -32    
544    -16    
-1376  352    
-64    -528   
-48    96     
-432   -720   
2784   1952   
-2112  544    
352    -224   
-96    -384   
-928   -112   
208    -112   
-288   256    
-720   -720   
-320   -32    
576    -80    
-496   240    
-272   -32    
-128   176    
16     -128   
240    -16    
-688   -16    
224    48     
-304   -32    
-96    32     
496    1328   
192    16     
-880   352    
592    96     
-464   -80    
0      432    
1152   80     
-1008  0      
80     -48    
336    -128   
-480   -192   
-160   128    
192    144    
-48    -32    
-64    224    
112    -160   
-656   -32    
512    0      
128    256    
-128   -16    
-416   32     
368    -16    
-384   -144   
-80    96     
80     272    
-160   0      
-192   208    
624    -272   
-1040  -160   
256    -256   
-16    240    
48     -192   
64     -112   
160    48     
384    112    
-304   -16    
448    -96    
-240   -32    
-112   352    
32     288    
80     224    
64     80     
-592   0      
32     112    
-272   -80    
288    144    
288    336    
-160   176    
-208   400    
400    192    
-352   144    
-208   176    
112    -64    
64     -16    
-48    64     
-176   16     
96     -128   
-80    -272   
-144   272    
16     -336   
16     -688   
16     -48    
-560   1200   
896    -656   
-1328  256    
336    -192   
672    432    
-448   -48    
-176   -16    
-240   -96    
256    -704   
112    288    
-400   112    
-128   -64    
-960   96     
160    -208   
-16    208    
-96    64     
16     -224   
-16    96     
112    128    
160    96     
176    864    
-992   -432   
160    656    
816    272    
-192   -336   
-208   96     
-96    -80    
-96    -32    
144    0      
-64    48     
-224   224    
-144   176    
240    80     
160    48     
-336   -288   
112    -144   
-192   144    
144    -64    
-16    192    
176    80     
-352   -48    
-528   32     
208    -192   
-96    -48    
112    0      
-192   80     
64     64     
-80    128    
-32    -352   
480    272    
-1264  912    
1520   624    
-400   160    
-112   -512   
272    80     
-288   -96    
144    848    
448    192    
-336   320    
304    288    
192    144    
-64    128    
-96    144    
64     -176   
-176   -64    
160    -96    
-176   -64    
256    -16    
32     -176   
-128   112    
-240   -320   
1136   1216   
208    48     
-1168  544    
1440   -128   
-544   16     
304    1024   
512    752    
-240   -192   
-16    -48    
-464   80     
320    -96    
288    128    
-272   32     
80     192    
-448   304    
240    16     
288    544    
-80    688    
-176   288    
64     144    
208    16     
-16    208    
288    1504   
928    928    
-448   256    
-256   640    
224    160    
-656   64     
256    -336   
208    -48    
176    112    
-144   304    
-80    240    
-208   -672   
-144   128    
-384   656    
-544   -464   
160    -224   
144    -144   
96     80     
-16    -80    
96     400    
-144   384    
-144   144    
128    -224   
-624   -80    
128    496    
448    176    
-368   80     
-240   -704   
1472   -1488  
496    624    
720    -528   
-1008  -432   
-64    -848   
320    176    
624    1776   
-272   -240   
-416   -464   
-32    464    
272    0      
640    208    
16     -32    
-560   -672   
-336   -272   
768    96     
208    256    
-240   -256   
-432   -544   
272    384    
432    752    
-96    -272   
-304   -16    
256    -288   
-288   -352   
384    -304   
-160   1376   
112    1936   
-48    -160   
160    -416   
416    240    
-464   272    
-64    48     
192    -960   
32     -448   
64     720    
304    48     
-240   -272   
-80    -448   
288    -16    
-112   -496   
32     -64    
-384   -400   
224    144    
128    848    
208    16     
-96    -304   
144    288    
384    64     
-272   -64    
-240   -1040  
-64    -16    
496    16     
-128   -464   
208    32     
-176   -128   
-112   32     
992    1456   
48     1504   
-272   -368   
96     32     
80     -48    
-224   80     
192    320    
256    256    
160    -272   
-160   -496   
-176   304    
128    144    
-96    -224   
208    -480   
-64    288    
-144   -144   
112    -272   
-176   -1024  
112    -1280  
96     224    
-48    608    
-128   416    
-256   -80    
992    -480   
480    512    
-272   -272   
-32    896    
944    704    
-464   -560   
192    48     
-112   -160   
-16    -480   
320    -528   
0      64     
-160   176    
48     -16    
400    96     
288    16     
-368   480    
64     48     
224    -144   
160    -192   
-240   0      
288    -320   
-192   336    
160    -736   
128    128    
0      208    
-16    -320   
-112   -400   
256    16     
-288   48     
48     240    
288    112    
32     -480   
-240   272    
416    -448   
-192   224    
176    480    
128    -256   
176    -624   
-192   64     
192    -16    
80     208    
-240   112    
144    64     
48     160    
352    -160   
-288   144    
64     -288   
16     176    
160    96     
880    640    
-1296  576    
-272   512    
1200   -96    
-592   160    
-720   -160   
672    16     
-80    -480   
-192   -352   
160    -48    
80     -224   
-192   112    
256    -112   
-96    -432   
272    -48    
-288   0      
288    -208   
-496   96     
288    -160   
16     -864   
-256   0      
32     -1104  
1264   400    
-464   -80    
336    -448   
-80    -96    
48     -144   
224    -16    
80     288    
448    -96    
-224   -304   
-48    -96    
128    128    
0      -64    
128    -240   
352    160    
-304   -256   
32     192    
-400   -592   
464    -96    
-176   -64    
-304   32     
416    448    
-1424  -240   
144    -288   
1712   -512   
-64    448    
-384   16     
-272   -176   
336    -304   
224    288    
128    0      
-496   96     
16     176    
944    384    
-320   368    
-464   128    
-80    128    
592    -304   
528    -48    
-288   -224   
-352   112    
-336   -848   
512    -96    
-160   -96    
-464   128    
576    -544   
224    240    
-448   -32    
-464   0      
-1824  -2432  
3104   -1744  
-1440  1824   
-768   -352   
224    160    
624    128    
16     -720   
-400   -224   
176    336    
352    320    
-432   80     
48     128    
240    -240   
-224   160    
-96    -112   
144    224    
-496   -112   
176    224    
544    -240   
-1040  -480   
-416   -240   
736    -48    
-432   112    
736    32     
-768   -1696  
608    208    
-192   -16    
-192   0      
160    -80    
432    -80    
-608   128    
336    272    
-256   -48    
320    -256   
-224   -400   
-176   -176   
-160   144    
528    80     
-352   96     
-48    -800   
-64    16     
-80    -48    
400    -224   
-352   -32    
240    -80    
-16    64     
0      0      
-96    64     
288    560    
-288   736    
208    544    
96     96     
-160   128    
432    -80    
-432   -592   
544    16     
-336   96     
0      176    
240    80     
-32    -448   
-576   -176   
96     -80    
96     144    
80     240    
-48    224    
128    -80    
64     80     
48     -512   
-176   -240   
192    -576   
-144   -144   
16     -48    
128    256    
-384   304    
112    80     
16     176    
288    -16    
-416   -96    
64     -464   
80     -64    
96     -336   
736    1376   
-2368  784    
1296   -384   
-48    -704   
-288   -48    
-640   192    
-768   -400   
240    -464   
-16    -336   
-96    64     
-192   -112   
-272   -384   
-64    -208   
128    448    
-1056  416    
-112   -544   
416    -592   
192    -96    
-64    -96    
48     144    
-224   -32    
384    -480   
-784   -48    
544    -1024  
-48    176    
80     -176   
-400   -192   
-32    528    
224    16     
-96    80     
176    -48    
-176   -128   
288    448    
-160   0      
-64    -144   
-160   192    
112    368    
-240   -64    
-224   320    
80     -416   
-368   -144   
-32    256    
32     -320   
160    192    
-128   -128   
176    304    
-144   -464   
-176   -112   
80     96     
64     -32    
1360   1264   
-1488  816    
-1216  -992   
2224   -416   
-1008  -592   
-1136  656    
1056   1392   
32     1376   
-416   496    
352    -944   
-80    -80    
-176   192    
96     0      
192    0      
-464   -128   
0      112    
192    176    
-176   256    
-32    -272   
32     -144   
-32    352    
-704   224    
2256   -64    
-1008  -896   
-1392  -1424  
1392   688    
-448   1504   
-512   928    
224    576    
32     112    
-160   -112   
336    -304   
0      -16    
-160   144    
-144   576    
192    32     
64     -112   
-784   -128   
624    1152   
-384   1200   
-32    432    
384    192    
256    208    
-464   224    
608    -784   
-656   -784   
112    -576   
832    -320   
-544   -224   
176    432    
-176   -64    
-48    320    
-608   -112   
128    0      
0      32     
-416   -16    
832    800    
-304   592    
16     672    
880    -256   
-400   -240   
176    112    
-160   -112   
224    0      
336    32     
-208   -80    
-208   192    
-304   -416   
480    -448   
-240   -16    
-736   -432   
1120   64     
1872   800    
-1760  384    
-416   736    
816    336    
256    1120   
-80    480    
-128   112    
-304   48     
112    -400   
336    224    
112    -480   
-432   416    
32     128    
704    304    
-144   512    
-192   304    
208    -512   
-32    -464   
128    352    
48     352    
80     80     
-640   608    
1200   208    
-752   -512   
-128   -32    
-112   -848   
112    1664   
192    1104   
-416   528    
288    -384   
144    -336   
-112   -352   
-16    160    
32     176    
-96    -112   
432    -928   
32     -240   
-384   -480   
176    -112   
160    352    
208    800    
-320   288    
-16    -464   
224    0      
-128   128    
480    -400   
-320   512    
48     -48    
-112   -416   
-96    -1344  
-32    -160   
-48    368    
-96    -768   
-1936  640    
1360   -432   
-432   -240   
-448   -128   
112    -464   
416    112    
-32    112    
-160   80     
160    336    
48     624    
32     272    
-112   144    
-144   -16    
-16    208    
544    928    
-416   768    
80     544    
320    144    
-48    400    
-160   0      
-32    -272   
192    -768   
-272   -64    
112    416    
-16    304    
256    240    
-384   368    
1280   -928   
-912   432    
304    32     
-64    -352   
288    -4128  
-336   -544   
80     -928   
-16    512    
336    304    
-272   512    
224    240    
-96    -336   
32     -336   
288    256    
-224   256    
-16    -176   
208    -32    
-64    -16    
-16    160    
-256   -1264  
848    -432   
-544   272    
0      256    
592    112    
-368   304    
304    -80    
-176   0      
256    -16    
-160   208    
368    176    
-96    0      
-112   -144   
-64    96     
224    160    
144    -128   
-256   192    
-32    -144   
-32    176    
352    -112   
-224   208    
144    64     
-176   64     
304    80     
-80    384    
192    112    
-64    208    
-64    -112   
32     224    
-224   416    
1856   -656   
-2464  656    
-64    -720   
1072   32     
-352   80     
-144   128    
-384   -400   
512    320    
-272   -384   
-48    208    
-48    -176   
96     288    
112    -160   
16     320    
-256   -48    
256    -416   
-160   -32    
-48    -816   
112    96     
48     96     
-80    -304   
1216   576    
-880   80     
-208   -832   
176    80     
96     -416   
-384   -112   
576    -208   
64     96     
64     48     
-480   -16    
-208   176    
432    0      
112    0      
128    -480   
-128   48     
-64    -560   
-320   -96    
-16    -32    
816    -144   
-352   64     
-400   -640   
-80    272    
464    -208   
-304   224    
992    64     
-240   864    
-896   64     
240    -400   
96     -416   
576    160    
-832   144    
-192   -144   
144    -80    
400    -208   
-176   -176   
-208   -48    
-64    208    
432    480    
48     80     
-80    -112   
112    -32    
-96    -256   
80     208    
224    80     
-128   416    
256    -64    
0      64     
240    96     
-1232  128    
2880   -2128  
-1408  736    
784    -192   
416    64     
-592   336    
-16    -416   
992    320    
-752   -32    
-48    -208   
-48    176    
208    128    
-128   240    
336    288    
-112   -32    
-224   208    
480    80     
-128   -96    
-224   -272   
48     304    
432    496    
-608   176    
272    128    
432    -64    
-288   96     
-16    -400   
192    144    
-352   -128   
96     -2000  
320    160    
80     128    
-240   48     
96     -368   
-272   -1040  
336    -80    
-240   336    
176    16     
-32    16     
-208   -416   
-16    80     
80     -240   
160    0      
-80    -16    
-48    -288   
80     208    
-192   -768   
368    -336   
-352   80     
128    -144   
384    512    
-368   208    
-32    -240   
496    -1152  
-176   -112   
96     16     
144    1200   
416    816    
-80    352    
-16    -96    
224    128    
-176   -384   
-336   -272   
192    144    
432    192    
-384   320    
160    -80    
-128   624    
448    -576   
240    640    
-208   -272   
-96    32     
0      -128   
128    224    
128    -96    
-48    -80    
-144   -112   
16     -512   
-160   -848   
224    160    
-48    336    
0      304    
624    496    
-1392  1328   
1104   -432   
64     -480   
144    -464   
-128   224    
-112   160    
160    320    
-112   -400   
112    -112   
-16    -144   
64     -128   
64     -272   
-208   48     
-16    -80    
0      -112   
176    80     
-384   -656   
96     -544   
-80    -16    
128    64     
208    -288   
-464   336    
848    -400   
-224   -432   
-16    0      
464    -48    
-688   256    
-48    -528   
320    -272   
-320   -192   
-64    -304   
-80    16     
-32    -288   
192    -32    
-32    -1456  
-240   192    
-112   -64    
208    16     
-64    -192   
-192   -64    
-96    -144   
176    32     
16     16     
-208   288    
-704   -16    
144    -432   
272    -32    
80     -64    
-416   272    
944    -608   
-3024  -256   
1040   432    
64     -128   
-1136  -752   
144    -160   
80     -96    
-336   400    
288    -1312  
320    272    
-160   448    
32     -400   
48     176    
-80    -64    
96     -32    
0      -384   
16     -384   
144    224    
224    -192   
-32    128    
-416   -832   
1280   480    
-576   -272   
-416   -256   
32     -96    
-480   656    
400    -80    
80     1216   
448    1424   
-256   1200   
352    208    
64     -32    
-304   -464   
384    -848   
-304   -576   
-272   160    
576    112    
-288   -16    
-128   -128   
32     -288   
32     32     
-688   -304   
176    560    
-528   -48    
192    -432   
-480   -144   
256    800    
784    432    
-832   464    
16     432    
528    448    
-48    -160   
-144   208    
96     -96    
304    176    
16     560    
-752   -320   
-80    -128   
160    -544   
624    32     
-112   -96    
-64    144    
-352   -384   
384    -432   
-80    -64    
-576   -160   
176    -336   
-128   -64    
208    -496   
-32    -320   
1264   2400   
-576   1104   
192    -288   
896    -192   
-48    928    
-1120  1520   
192    736    
304    496    
-96    576    
-464   -848   
-112   -96    
272    448    
-352   240    
-208   -576   
-272   -272   
96     16     
48     256    
272    320    
-160   208    
-224   640    
384    400    
64     144    
-464   -368   
80     -528   
912    -1264  
-1072  -192   
1040   -256   
-896   320    
320    -32    
112    208    
160    448    
-32    -16    
-160   112    
336    -144   
-96    -16    
-144   -96    
-128   -96    
96     48     
0      208    
16     336    
80     592    
-64    560    
96     -224   
96     -112   
-1120  -48    
-208   240    
368    496    
-48    704    
-48    432    
64     0      
32     -112   
-192   -16    
368    304    
832    368    
-64    -224   
-944   -272   
576    -288   
96     592    
-256   544    
-448   144    
208    -128   
-384   -64    
336    128    
352    -32    
-320   -16    
-192   -64    
256    96     
-80    320    
-224   -112   
160    -144   
96     16     
-256   48     
208    -272   
0      16     
-320   304    
128    176    
-992   16     
0      -32    
128    -128   
-272   48     
-112   288    
464    2240   
1584   -272   
-1680  384    
224    -160   
-80    -80    
272    -320   
-512   -48    
-128   -432   
-32    -400   
112    288    
240    -80    
-160   176    
32     256    
-160   256    
272    -112   
-32    464    
336    -336   
-400   160    
96     128    
144    -48    
-208   -1248  
-80    336    
240    352    
-944   -16    
592    144    
96     -544   
-256   208    
-112   272    
96     464    
544    16     
-208   0      
-336   16     
80     -32    
-224   128    
512    96     
0      176    
-80    -176   
-400   128    
464    -128   
-368   32     
352    64     
-48    96     
16     144    
240    256    
-432   128    
-16    288    
96     -32    
-192   0      
272    32     
896    976    
-688   960    
320    224    
336    -32    
-160   -32    
96     128    
-192   -32    
288    496    
-144   128    
16     160    
128    32     
-320   128    
160    64     
-128   0      
416    96     
-384   -144   
240    208    
-176   80     
0      80     
-16    144    
224    16     
-48    16     
672    -112   
-1008  368    
1680   288    
-1072  208    
-416   496    
1232   64     
-224   432    
-448   112    
-48    64     
64     160    
-48    -32    
32     208    
-64    -48    
80     144    
80     64     
-144   48     
144    304    
-144   112    
64     0      
32     64     
288    688    
-1088  -32    
512    288    
-176   128    
-384   16     
112    -240   
64     -2528  
928    224    
-656   336    
-96    0      
432    192    
-144   144    
-224   -208   
112    -160   
48     96     
240    48     
80     272    
-880   320    
208    -64    
96     160    
-128   -16    
-16    -432   
-144   128    
16     -80    
432    -304   
-272   128    
128    0      
-128   48     
-1328  -2000  
2528   -2352  
160    800    
-1520  176    
-304   480    
624    -128   
592    -176   
-576   16     
-480   -464   
416    144    
-336   -64    
336    80     
-240   -112   
-32    96     
64     -80    
288    48     
-256   192    
-112   208    
-208   -48    
64     -1104  
-656   -1632  
256    -560   
-256   80     
448    240    
640    -16    
-672   -832   
-128   112    
-48    128    
368    80     
336    240    
-176   400    
-224   576    
32     384    
432    352    
0      272    
-416   400    
336    496    
544    400    
-128   224    
-144   224    
32     -32    
112    176    
256    320    
-176   224    
-32    416    
864    464    
-528   240    
-96    560    
144    496    
208    624    
256    464    
-208   -176   
256    672    
736    -448   
-400   -160   
-240   -176   
-32    -128   
-16    -2048  
320    688    
96     1072   
-96    -96    
-384   -928   
96     -400   
160    160    
-16    -64    
96     448    
-128   -160   
128    -272   
-64    400    
192    96     
48     128    
-80    -80    
32     -48    
112    64     
192    -176   
-288   -240   
48     -144   
272    -640   
-416   -976   
176    -32    
384    48     
-144   -48    
240    432    
64     400    
-256   48     
-208   -240   
32     160    
-32    32     
240    384    
64     192    
-32    16     
-32    -288   
32     160    
224    -16    
-64    -16    
-96    224    
304    128    
32     240    
160    -256   
-64    32     
-160   16     
-128   -48    
848    -592   
-240   368    
480    -704   
-320   224    
-144   352    
32     -144   
400    768    
512    144    
-736   -112   
-96    -240   
704    144    
0      -240   
-96    64     
16     128    
0      80     
0      -96    
208    -144   
32     192    
32     -1856  
112    224    
128    0      
64     16     
-16    -80    
-112   -1584  
-96    -64    
224    -1008  
-80    160    
720    784    
-432   688    
1488   512    
-2512  -160   
-816   -784   
1840   -496   
-928   -624   
-480   -80    
224    -416   
-128   96     
-256   -2064  
336    -48    
-192   144    
-208   320    
80     -288   
320    -1392  
-160   -480   
-176   96     
-16    -336   
208    -560   
112    416    
-96    96     
-240   -480   
896    688    
672    -256   
-2224  432    
1248   -976   
-80    -368   
-656   224    
64     -32    
800    -1200  
-800   -944   
224    -928   
480    192    
-240   160    
16     624    
416    64     
-288   -32    
32     -64    
-192   -672   
-272   -368   
384    -144   
-432   -16    
80     -240   
320    -144   
256    -272   
-688   -1680  
-784   -784   
672    592    
-208   1248   
496    -48    
368    656    
-592   384    
-112   -32    
272    -560   
-272   -304   
-96    -544   
-1104  -48    
1168   672    
416    176    
-48    336    
320    -128   
-192   -320   
528    112    
240    400    
-592   272    
-112   -160   
400    -192   
320    -192   
-112   128    
-16    624    
-272   208    
1040   -224   
-1664  -272   
400    -16    
864    -160   
-304   -368   
32     -1120  
-432   80     
640    -48    
208    -144   
-224   -256   
-256   -384   
160    208    
176    -144   
208    240    
-176   -144   
-656   336    
640    -256   
-416   96     
16     -1440  
-800   -1344  
416    -784   
96     192    
192    -416   
112    32     
-448   -240   
208    304    
-384   160    
112    272    
272    96     
-208   560    
112    176    
-432   -176   
160    -272   
160    48     
96     192    
0      224    
-80    336    
48     -96    
320    176    
-272   48     
-240   -16    
192    80     
144    0      
48     -64    
384    32     
-96    -32    
-256   0      
112    176    
96     -160   
80     -112   
-32    -320   
-208   -288   
304    -336   
176    368    
-448   48     
192    96     
-144   16     
-48    -144   
-64    -640   
-352   -208   
208    128    
224    -80    
0      144    
-720   -112   
-192   144    
-288   -432   
336    464    
288    208    
-352   -304   
-48    160    
48     144    
0      -128   
-528   -64    
-80    -32    
112    208    
-96    -32    
-112   -256   
80     16     
-304   -160   
-32    144    
-672   -960   
1248   -1072  
-1520  624    
512    96     
64     -656   
-864   288    
480    -288   
48     496    
240    -416   
-992   -48    
192    32     
-16    -208   
-16    224    
-256   -112   
144    -480   
-80    320    
96     64     
-192   0      
-32    80     
-32    -48    
16     128    
16     1248   
1088   -240   
-1120  -512   
-80    144    
720    64     
-608   -16    
128    96     
80     144    
64     -64    
-288   -80    
352    -160   
-64    160    
-272   32     
240    192    
-320   -64    
-224   432    
416    -48    
-208   32     
-128   -256   
-304   64     
528    -48    
-256   256    
320    -272   
-352   -48    
96     96     
176    0      
-224   192    
384    48     
-224   144    
-784   608    
32     480    
-592   432    
288    -80    
480    240    
-400   16     
-240   -80    
-208   -80    
256    64     
160    80     
144    112    
-256   48     
48     96     
96     96     
-400   -16    
144    112    
-224   -32    
176    16     
-112   272    
-112   112    
48     128    
96     832    
-1264  -544   
-224   128    
496    -32    
-368   -192   
368    240    
-288   80     
0      544    
880    -64    
-384   -32    
-112   80     
-32    64     
48     112    
-144   -64    
208    16     
-592   80     
192    -256   
-80    96     
-224   416    
176    48     
-112   -192   
288    96     
256    64     
-784   96     
352    32     
80     128    
128    -288   
-512   416    
256    -64    
-144   0      
-272   96     
176    176    
256    -32    
-192   -128   
-224   0      
128    304    
400    336    
-640   304    
496    128    
-128   -48    
-192   16     
192    0      
-128   112    
32     0      
80     368    
-32    160    
80     16     
96     80     
-688   -1088  
48     -464   
1312   -1376  
-32    528    
1120   176    
-912   -112   
-848   -32    
944    -48    
384    16     
-368   -208   
-400   -80    
144    224    
160    -128   
128    192    
-288   -96    
16     -64    
448    48     
112    80     
-128   -144   
-320   -64    
496    -1104  
-208   -496   
0      -96    
176    672    
-688   128    
224    -400   
96     -48    
240    -96    
-352   -128   
224    -640   
192    -928   
-240   320    
144    480    
-16    -400   
80     -128   
-48    208    
96     320    
-80    -32    
-384   -576   
656    -1072  
-352   -288   
-32    96     
32     96     
288    80     
-128   288    
-32    576    
560    112    
-704   -1088  
272    -960   
128    1040   
-16    528    
-96    -256   
272    992    
-656   -192   
144    400    
304    1120   
-464   -224   
160    272    
48     -128   
-32    224    
128    -16    
-112   -80    
224    48     
-48    192    
-176   80     
96     320    
-48    64     
272    416    
-128   32     
-288   144    
208    48     
-64    -1440  
128    64     
-16    128    
-208   0      
96     -176   
352    176    
-48    16     
-16    -96    
-288   -208   
64     144    
48     80     
224    560    
-400   48     
64     -32    
384    112    
48     -928   
-336   368    
-144   288    
176    64     
32     -240   
48     64     
-384   304    
48     80     
192    0      
352    -192   
-560   240    
208    -64    
192    -416   
-16    96     
32     64     
-80    -560   
416    -288   
-1088  -272   
672    160    
-80    336    
16     96     
-48    -32    
-80    -160   
128    80     
240    0      
432    -320   
-80    192    
-592   560    
352    -144   
208    -176   
-96    -16    
-160   64     
288    -768   
224    0      
160    320    
160    0      
-176   240    
432    112    
-272   -672   
128    -112   
-288   -416   
192    464    
48     80     
144    -80    
-640   176    
32     -272   
-1328  592    
2208   -960   
-304   -224   
-944   -2544  
464    640    
720    432    
-192   496    
0      1760   
-496   -496   
96     -880   
208    -768   
-368   192    
-16    336    
112    256    
80     -304   
144    -48    
-160   -32    
-64    176    
256    -1088  
64     -272   
160    1248   
-464   -1008  
-992   752    
1552   352    
-816   432    
-256   -512   
-496   -928   
448    -720   
-432   256    
48     272    
384    48     
-176   -224   
-96    -272   
-160   -368   
320    80     
-448   128    
208    -16    
-16    336    
240    -80    
-64    192    
-96    -224   
80     464    
-32    32     
-784   -32    
-272   -1120  
608    -352   
16     64     
-256   -32    
80     -272   
-80    160    
576    -176   
-256   240    
-80    -48    
304    96     
144    -304   
112    -496   
-1040  -608   
480    -416   
672    336    
-416   -320   
-64    48     
320    -432   
160    -96    
672    -352   
-400   64     
336    -48    
448    -1408  
224    32     
-304   -2288  
416    -2432  
-912   2912   
1216   -864   
-1248  -96    
-208   -1264  
1056   -80    
400    320    
-864   224    
-32    64     
80     112    
368    -304   
32     160    
-160   -272   
-144   160    
-96    160    
256    -112   
-16    -32    
-16    -320   
-144   -32    
560    -1792  
-736   -160   
672    -64    
-176   112    
320    -64    
-464   -112   
16     144    
192    608    
304    0      
-160   160    
-256   288    
400    128    
-752   96     
288    -336   
160    -64    
80     -64    
48     208    
-192   -16    
208    -592   
336    -1104  
-48    -304   
208    -208   
-256   144    
-64    -208   
512    16     
-144   -80    
-48    -176   
-464   -96    
144    -192   
224    -240   
-320   -304   
192    -240   
-240   -208   
64     -480   
-640   -1456  
624    816    
-592   288    
-224   416    
736    272    
-864   176    
176    -112   
-240   48     
240    64     
96     -48    
-400   -208   
112    -384   
-432   -64    
432    -16    
-80    320    
304    -464   
-336   32     
-144   32     
352    128    
208    -144   
-64    -16    
-112   16     
-32    64     
-80    -112   
0      -192   
-304   -16    
-48    -288   
-400   64     
608    1920   
-960   -1696  
-976   -400   
1872   -304   
-560   -720   
-112   400    
-368   192    
784    80     
-480   416    
-80    -128   
-16    -224   
-16    -32    
272    32     
-112   -64    
32     -208   
-144   -48    
256    -128   
48     -400   
-160   48     
80     -1392  
-80    368    
464    1200   
336    -448   
-1008  -272   
512    -240   
-240   -240   
-64    160    
192    224    
-464   192    
-96    -320   
160    -288   
224    48     
32     64     
-96    128    
-80    -944   
80     -400   
192    -64    
-384   -176   
176    96     
16     -64    
-192   80     
272    -32    
-288   32     
80     -112   
304    -48    
-400   -224   
112    224    
192    -16    
64     16     
-80    -416   
1056   976    
-2320  368    
96     208    
880    -160   
-592   112    
240    112    
96     -208   
-336   48     
0      -32    
224    160    
80     -80    
-208   80     
-192   -240   
448    240    
-576   -80    
-576   256    
0      -80    
-976   48     
128    160    
-144   112    
-144   0      
448    960    
-976   -816   
-464   176    
1024   496    
-464   -400   
16     240    
-528   -16    
192    -128   
112    32     
-288   112    
112    -48    
-688   96     
-96    -80    
208    -128   
-48    96     
0      48     
-128   -288   
-544   368    
336    -64    
48     -128   
-192   192    
-288   304    
1088   -688   
-560   368    
-128   192    
624    -80    
-240   48     
-176   48     
-304   32     
16     144    
-816   48     
32     144    
-112   -272   
-80    -128   
32     -144   
-320   432    
800    -192   
-128   -128   
368    272    
-32    -112   
-368   48     
96     128    
16     -32    
-112   112    
-128   -176   
304    -112   
352    208    
-288   -368   
208    496    
-96    144    
304    1904   
1472   112    
-2064  -912   
-816   -176   
2032   176    
-720   -672   
112    -1824  
128    368    
176    384    
-464   416    
-32    0      
144    144    
-128   160    
208    304    
208    304    
-416   752    
80     -352   
576    -32    
-224   528    
-64    160    
16     -208   
80     -336   
32     -544   
-448   -1008  
32     32     
128    864    
144    1056   
-224   528    
-128   128    
160    -464   
96     -128   
-176   592    
48     544    
-32    128    
-16    160    
32     800    
288    992    
-304   640    
-32    -176   
176    -192   
-192   -112   
160    352    
-672   -368   
-64    -992   
368    -1040  
-192   80     
128    -80    
-560   -704   
160    464    
-384   -640   
-16    -80    
416    -816   
-816   -176   
96     -752   
-128   -496   
-160   112    
64     -688   
-48    288    
112    928    
32     112    
192    -160   
-160   512    
-224   -144   
-96    -16    
-32    96     
-64    368    
-96    320    
-176   -272   
-224   -144   
80     176    
-48    16     
160    208    
-240   -80    
112    48     
176    144    
0      144    
144    288    
-176   672    
32     144    
432    -16    
-384   -240   
400    -1008  
-128   432    
368    -288   
-224   32     
-304   144    
384    -240   
0      32     
112    -144   
80     -16    
-192   160    
224    32     
112    16     
80     144    
-112   48     
208    32     
-16    272    
224    656    
-176   800    
-96    400    
576    -416   
-944   688    
400    0      
64     288    
96     -288   
-32    48     
-112   128    
48     160    
64     304    
272    176    
-192   -32    
-416   0      
192    192    
112    16     
-64    544    
64     -464   
-160   368    
-176   1056   
-32    -592   
544    -384   
-592   528    
-16    -80    
-176   176    
416    -288   
-64    -192   
-32    48     
-32    288    
-64    224    
160    -128   
-304   -16    
-1360  -1040  
608    768    
992    -496   
-368   80     
-1904  864    
1904   160    
-832   224    
-832   496    
560    80     
-240   32     
64     352    
-16    112    
-16    64     
16     -16    
176    32     
-32    96     
-112   -608   
0      -208   
128    -144   
-80    144    
-432   -576   
1328   320    
-1008  0      
16     176    
784    -128   
-816   112    
336    512    
656    96     
-144   -64    
64     256    
-112   -48    
48     -2224  
48     0      
-64    0      
464    64     
0      208    
-320   64     
208    176    
528    -16    
-240   32     
-128   144    
272    544    
-640   432    
-16    -272   
160    272    
32     736    
-96    -512   
176    336    
-496   0      
-144   -160   
544    0      
96     32     
-176   352    
240    240    
-64    192    
-160   128    
-48    80     
144    304    
-128   -256   
-1504  -592   
160    192    
128    0      
112    48     
-64    -720   
-224   48     
352    864    
1120   -32    
-896   80     
160    272    
-368   1600   
-448   1280   
528    240    
-1136  112    
208    -384   
816    112    
80     -80    
-688   128    
240    96     
-64    -912   
-80    0      
176    -16    
-432   -192   
-48    -32    
96     32     
-96    -64    
-192   -48    
208    0      
112    80     
400    448    
-1376  -160   
832    336    
80     -608   
-192   96     
640    -1152  
64     16     
-496   -1936  
688    192    
192    16     
-496   368    
480    -16    
-192   160    
144    -64    
16     -16    
416    -16    
-1008  -416   
576    128    
416    192    
-384   128    
-272   -288   
144    272    
80     -272   
256    256    
-352   -16    
160    0      
192    80     
-48    -96    
-16    -48    
64     -112   
-96    32     
400    -80    
-80    128    
-336   -608   
288    0      
96     -320   
240    224    
208    -224   
-112   -64    
128    -384   
-160   -176   
48     -240   
-160   112    
32     80     
112    64     
80     -16    
32     -384   
-272   672    
-48    -208   
208    272    
448    784    
160    176    
-416   -432   
112    192    
48     272    
224    16     
-48    0      
-80    -32    
-304   304    
304    112    
320    -304   
-240   -112   
768    416    
-2464  768    
1408   96     
112    -224   
-32    16     
-48    -16    
-208   -112   
496    -272   
-160   -320   
160    -112   
-160   -1344  
-96    -1088  
240    -48    
192    -272   
-576   -272   
384    -2512  
80     176    
0      -80    
160    -720   
-16    176    
-128   -576   
640    -1872  
-592   208    
64     -912   
352    32     
-624   80     
128    96     
304    -128   
192    -256   
-352   112    
-48    -240   
240    160    
224    -992   
-112   -112   
-64    -416   
256    48     
0      -16    
272    64     
0      -16    
-176   80     
112    96     
128    -144   
48     -32    
-16    -368   
-32    -96    
112    -368   
16     128    
-80    -224   
240    -64    
272    -32    
-784   -1584  
-624   32     
960    64     
-464   16     
288    -256   
336    -48    
-752   -432   
128    -528   
144    -416   
-160   0      
64     48     
304    192    
-256   -1200  
32     -160   
48     -288   
96     -160   
-96    0      
256    48     
224    -112   
-64    -32    
-80    64     
-96    -864   
-352   624    
1344   -160   
-3120  -160   
192    112    
560    -624   
-672   -224   
384    -16    
-416   -336   
576    -32    
272    -96    
-384   96     
48     96     
240    80     
-112   0      
-96    64     
-160   -288   
-272   -160   
-128   -32    
368    -192   
16     16     
240    736    
-208   -336   
384    304    
-192   16     
-1040  -2656  
1008   -96    
144    496    
-656   80     
464    -16    
128    -160   
-128   80     
32     -384   
224    -208   
128    -160   
-608   304    
400    -688   
-128   64     
592    -464   
384    16     
-16    -944   
-160   192    
-48    128    
384    -176   
128    352    
400    160    
-368   -32    
336    320    
-48    176    
-800   -768   
1344   -672   
1952   400    
-1712  -208   
-320   -1552  
576    -528   
1072   272    
-288   1632   
-272   320    
64     288    
192    -304   
288    368    
-432   -160   
-64    176    
-144   -80    
432    -256   
-416   -384   
-96    -128   
-16    -128   
-160   -304   
224    416    
-144   240    
0      -256   
-208   -128   
176    -80    
-304   800    
288    816    
96     -672   
-112   -1104  
-64    464    
192    -288   
32     -272   
-80    -256   
-96    384    
80     -512   
-192   -576   
-336   96     
160    -32    
32     -1024  
-304   -16    
-256   176    
-16    400    
32     -272   
272    144    
-208   -160   
-32    -176   
32     256    
320    608    
128    -32    
-448   -384   
-144   -16    
464    0      
-1200  896    
800    992    
-64    960    
112    368    
-224   432    
-224   -208   
384    -1184  
-240   352    
-112   112    
32     160    
-128   -192   
240    176    
16     -208   
-224   -432   
-160   -400   
224    576    
0      1168   
-688   -112   
-32    -352   
-48    48     
-144   272    
-704   32     
-288   352    
-160   304    
64     624    
-160   224    
-496   560    
-64    -384   
160    -96    
352    -608   
-544   -256   
-352   864    
432    1040   
-288   1024   
32     -320   
272    -976   
-336   -336   
-64    448    
-80    240    
320    -320   
-32    256    
-256   160    
-112   224    
-48    0      
144    -112   
32     64     
-320   80     
-48    112    
352    16     
-32    -832   
-368   -400   
-96    96     
-304   160    
-544   752    
-192   -80    
48     -32    
64     48     
-112   320    
192    -304   
-240   288    
-144   16     
-96    96     
320    96     
192    -160   
-528   -16    
32     -48    
-96    -288   
80     80     
-704   368    
208    144    
80     -32    
-240   32     
112    80     
-352   64     
464    -48    
-320   144    
128    32     
192    528    
-752   160    
-864   16     
2624   128    
-848   -640   
-832   256    
1136   -288   
-368   -288   
112    -256   
176    208    
-288   288    
208    144    
-352   -48    
160    96     
-96    64     
144    96     
-208   32     
224    32     
-112   272    
-208   48     
16     272    
-64    -144   
-128   -208   
880    -96    
-1440  336    
1024   -96    
-352   128    
-464   80     
256    32     
144    -32    
416    272    
-64    64     
-528   -48    
160    112    
-128   -208   
16     144    
-80    -320   
-752   288    
656    -224   
-480   -768   
-64    -384   
176    32     
-304   160    
320    416    
-512   176    
-32    32     
-288   336    
-112   112    
176    192    
272    80     
384    272    
-656   368    
-448   -32    
496    80     
240    -112   
-272   176    
-128   -16    
-128   -160   
80     192    
416    -160   
-544   -304   
-576   112    
-144   32     
256    -96    
256    -128   
-208   192    
-608   16     
720    256    
512    16     
-384   -48    
-64    208    
-1056  -832   
592    2592   
1424   -400   
-1920  -752   
480    -16    
768    -304   
-432   -304   
-144   16     
-112   208    
112    112    
-144   416    
-256   -144   
336    256    
400    16     
-144   64     
112    64     
-144   176    
240    32     
464    96     
336    336    
-1504  192    
1008   112    
144    0      
-288   -112   
336    192    
-128   192    
-688   144    
816    224    
-320   368    
496    160    
-576   160    
496    224    
-176   16     
176    -160   
-32    -208   
80     -144   
64     48     
-288   128    
112    304    
96     -208   
-64    272    
48     -32    
-32    192    
48     -48    
32     16     
112    -48    
16     128    
240    96     
-80    -144   
-560   -176   
432    32     
-80    -16    
304    160    
-1088  416    
496    -1968  
-64    544    
688    432    
-192   -176   
-64    -432   
160    32     
128    112    
64     112    
-240   -48    
32     176    
224    256    
160    16     
-224   0      
128    208    
160    112    
224    -528   
176    384    
-208   -144   
32     -112   
48     -80    
-16    96     
16     16     
176    -352   
-288   304    
112    416    
208    -48    
64     -16    
544    2336   
-1536  -784   
416    0      
1360   -1552  
-656   368    
-64    -976   
-64    -176   
576    -1152  
-96    -288   
32     336    
-240   368    
224    -128   
256    128    
-80    176    
208    288    
-64    656    
112    -304   
0      432    
160    -256   
-112   256    
160    -1680  
-224   592    
800    -432   
-992   -176   
704    112    
-208   576    
-32    16     
400    208    
-112   32     
-176   -144   
144    464    
864    688    
-592   800    
-144   -48    
-32    16     
400    -368   
256    -192   
-368   -816   
48     480    
352    112    
64     128    
80     96     
0      224    
-48    176    
208    224    
64     192    
-256   -32    
-16    208    
176    -96    
432    256    
288    720    
-192   1888   
-240   -80    
496    -288   
-944   -208   
352    -32    
224    -80    
256    144    
-240   32     
-32    -16    
224    48     
-16    -336   
-128   144    
176    336    
-48    480    
-32    224    
224    48     
-128   -320   
-304   -224   
48     -208   
0      -64    
576    432    
-1936  -128   
496    752    
512    496    
-1088  -16    
336    -400   
528    1168   
304    1408   
-208   720    
416    144    
-32    144    
-192   -1520  
160    80     
-32    320    
-48    400    
32     80     
272    -128   
-336   -896   
-256   112    
496    304    
-256   96     
64     224    
-272   240    
496    768    
-560   128    
224    1136   
704    128    
-48    -336   
0      64     
128    -2144  
-400   -64    
256    336    
-224   464    
288    704    
928    80     
0      -368   
-32    608    
-112   416    
-528   1008   
592    288    
-304   -128   
-272   -176   
160    -320   
384    -64    
-96    -368   
-96    -320   
288    -80    
-128   -320   
-96    48     
144    -800   
-848   800    
-48    -704   
-704   -80    
-448   -736   
1344   1360   
32     544    
-416   -432   
-16    -1376  
-16    1376   
384    -80    
-176   96     
-672   -288   
144    144    
48     80     
-192   -208   
0      -80    
-480   -336   
-48    -224   
368    -208   
-80    96     
-16    144    
-48    176    
-256   -320   
64     416    
352    464    
64     368    
-640   -96    
400    -48    
-400   -464   
96     -208   
-96    336    
-192   -48    
128    80     
208    320    
-256   -384   
-112   -48    
592    880    
-288   -576   
-432   624    
352    464    
240    48     
144    128    
-160   432    
80     0      
-128   -192   
-304   -352   
352    480    
-176   1088   
-544   -1392  
688    288    
240    -384   
-16    -96    
-1040  -384   
320    -752   
496    -1104  
-528   -288   
-176   -880   
-368   -672   
208    112    
192    400    
-976   -1104  
-160   -800   
336    352    
320    256    
-112   -16    
-16    -320   
160    560    
208    -1120  
-32    864    
-64    -32    
112    -368   
-128   256    
256    16     
-160   208    
0      960    
-176   464    
-128   80     
80     -224   
416    -368   
-80    0      
-208   -1344  
-800   848    
1008   -960   
304    432    
224    1600   
-192   1104   
-384   208    
128    -128   
16     -80    
112    -816   
-272   -224   
0      -16    
-96    448    
112    -80    
-128   128    
96     96     
304    128    
112    -528   
-32    240    
-96    112    
-128   -544   
384    -704   
-480   608    
16     48     
16     112    
112    544    
176    -352   
-624   832    
208    -336   
-64    32     
48     -320   
64     32     
-128   -16    
-336   0      
-224   112    
48     -192   
208    -32    
-48    160    
-48    0      
-32    16     
144    -48    
16     -288   
-288   192    
-192   -48    
-416   64     
192    -16    
-128   112    
-128   16     
-560   0      
-272   -96    
16     368    
1264   560    
-736   192    
-192   -240   
288    -224   
544    -288   
-624   -352   
144    112    
48     -176   
-176   16     
-192   -192   
288    64     
-336   -112   
416    112    
-400   -96    
128    112    
0      96     
-640   0      
-32    -16    
320    48     
-160   64     
-720   -224   
1232   -672   
-688   -96    
336    -16    
-16    -16    
336    -160   
-480   112    
80     320    
128    16     
-128   128    
-144   16     
32     32     
16     96     
-512   0      
112    112    
-80    -192   
240    -96    
-288   -48    
-592   416    
256    272    
112    352    
-480   -128   
192    80     
816    -112   
-448   48     
208    688    
-176   480    
-256   48     
-352   -224   
-336   -208   
64     -144   
528    176    
16     144    
192    -144   
16     432    
-176   80     
-272   304    
272    -176   
192    96     
-32    -192   
-48    48     
288    -224   
-240   32     
-480   -224   
352    288    
976    224    
-528   240    
-400   -64    
752    -304   
-864   2288   
2384   -1968  
-2096  960    
816    -192   
-384   -96    
-80    144    
592    -320   
-528   16     
368    96     
-80    96     
-208   160    
-432   16     
752    96     
-608   -128   
-64    -32    
32     112    
16     128    
-192   16     
672    368    
-1152  32     
560    0      
-208   48     
64     -128   
432    96     
-576   16     
336    240    
-368   112    
-80    240    
80     304    
-144   -32    
304    272    
-160   240    
-64    192    
96     352    
160    128    
-320   288    
-160   64     
48     -112   
-176   -288   
-240   -160   
-80    80     
-64    -96    
96     -16    
96     80     
-32    -16    
80     208    
-128   96     
80     272    
400    240    
-560   0      
32     32     
592    672    
608    -80    
-672   -32    
464    0      
-224   16     
-240   -1088  
-192   -976   
32     -368   
-352   160    
368    144    
96     16     
-256   16     
32     -48    
16     -48    
96     -16    
-16    0      
-224   96     
112    0      
-240   -16    
144    64     
0      -96    
-96    -128   
112    -96    
144    240    
-112   512    
208    -48    
-176   -128   
80     -176   
80     -32    
800    1776   
-1760  1440   
688    -528   
176    -656   
224    432    
-448   -16    
80     368    
128    -64    
-160   368    
64     -96    
16     224    
-16    96     
128    96     
-64    0      
-144   -384   
48     128    
192    96     
-16    32     
48     496    
-32    -240   
-144   -384   
48     -656   
368    624    
336    704    
-480   -496   
112    368    
-144   224    
-64    448    
32     -240   
112    368    
-272   192    
128    112    
0      -304   
-384   768    
-64    128    
-352   -128   
112    -160   
528    -80    
-128   416    
-192   48     
32     -16    
112    128    
176    128    
-48    -224   
64     -288   
112    256    
160    256    
-272   32     
-224   -288   
528    -880   
848    -1184  
-2704  528    
1008   448    
192    -768   
-720   -192   
416    -240   
-320   -432   
-144   960    
-32    -400   
400    608    
-64    -64    
-288   96     
80     304    
16     96     
144    -64    
-80    -112   
-64    -80    
112    -272   
48     -160   
-192   48     
144    160    
144    720    
1872   80     
-1600  432    
-64    720    
496    528    
192    928    
48     1808   
752    832    
-688   -880   
-304   -2144  
592    -288   
-144   464    
-112   272    
112    -192   
144    -32    
-96    144    
112    80     
-384   112    
-80    16     
112    -464   
32     -320   
192    48     
-192   -80    
-688   -1264  
512    -624   
800    1936   
-1232  -816   
480    704    
128    16     
16     -112   
192    -304   
-752   -16    
880    -144   
320    368    
128    224    
112    48     
-256   1568   
960    224    
-592   432    
-80    -240   
240    624    
336    -1008  
384    -560   
-208   -288   
512    -416   
-192   512    
144    688    
0      656    
16     352    
-688   -1552  
1552   -1456  
1200   832    
-528   -272   
-688   -352   
208    -1856  
64     -1600  
320    -608   
192    720    
-208   -368   
-224   32     
192    -224   
256    64     
0      512    
0      32     
-48    80     
-112   -208   
-64    128    
-80    -176   
64     384    
256    176    
64     368    
-304   -688   
-208   448    
688    -1424  
-656   -288   
192    192    
-96    480    
64     736    
176    688    
224    496    
-64    -112   
240    -560   
48     -608   
48     80     
-512   -736   
480    48     
176    176    
-128   48     
64     -16    
-16    -96    
0      48     
112    -240   
-80    -368   
336    -128   
-864   -352   
112    -800   
176    -592   
80     -112   
80     384    
-176   192    
224    -208   
-800   -304   
592    704    
448    -208   
-176   144    
-256   -448   
320    -208   
-80    -208   
160    -768   
-352   832    
272    400    
400    -672   
-384   96     
0      16     
0      -304   
448    512    
-240   304    
256    1184   
-176   608    
192    -64    
304    16     
-48    -416   
-112   -144   
-224   -256   
16     -1328  
240    -1088  
-336   -976   
48     -1088  
128    -1088  
-368   -512   
1232   1280   
-208   656    
-448   -768   
16     352    
-16    -176   
544    496    
16     176    
64     272    
-432   -128   
-64    -80    
304    -256   
64     -96    
-128   -32    
128    -352   
144    160    
144    -1488  
-16    208    
160    -128   
-240   -112   
336    -384   
544    1040   
-944   -576   
-400   464    
1456   0      
-848   -272   
-48    -112   
64     352    
256    192    
-288   384    
64     -352   
112    -832   
16     -208   
-176   -384   
320    80     
16     -112   
-16    256    
-192   -32    
96     -16    
-176   0      
256    -192   
-448   -48    
64     -80    
-320   80     
240    -112   
160    -48    
80     16     
-416   -144   
16     -528   
288    32     
-320   -704   
1120   -928   
-1584  672    
1344   0      
288    48     
-1568  -464   
544    176    
416    352    
-384   -32    
352    -224   
-192   -112   
-32    -688   
80     96     
16     16     
-224   96     
608    160    
-320   -16    
-80    80     
160    -112   
-48    80     
144    -48    
-368   64     
-464   -304   
1168   -224   
-624   -512   
-256   0      
864    -80    
-816   144    
944    48     
-304   448    
-176   -1136  
304    -112   
16     80     
80     -48    
-112   64     
96     32     
176    -64    
0      160    
-240   -432   
-128   -208   
400    16     
-384   -144   
240    480    
-576   -48    
368    -16    
176    -1568  
-16    -256   
-496   16     
-112   -16    
592    -160   
-400   -64    
-320   -208   
528    48     
-64    272    
0      48     
320    64     
-64    -288   
-672   -16    
112    -336   
-560   352    
32     -48    
-96    -160   
368    32     
48     112    
-176   -128   
-208   16     
480    -208   
208    0      
-32    144    
-192   -80    
848    1696   
-2448  2816   
544    64     
-112   -208   
-864   -368   
1392   48     
-384   -224   
-608   272    
48     -128   
320    624    
576    -128   
-672   64     
368    -128   
-224   112    
-736   -256   
240    288    
-384   -32    
-400   144    
432    -96    
96     176    
-976   448    
48     48     
-16    -192   
-112   -176   
480    160    
-1200  -176   
-304   128    
800    -16    
-768   224    
32     80     
192    240    
-288   -224   
336    -64    
-48    -448   
48     -288   
-464   -80    
464    16     
-128   96     
112    0      
-96    -272   
-448   -96    
160    -112   
-160   -320   
192    -464   
-176   -384   
-176   528    
-64    944    
592    -96    
-368   -544   
-96    48     
112    -128   
-128   0      
-32    -720   
48     -240   
-144   304    
-144   496    
224    112    
-560   -448   
304    -368   
-720   -288   
-80    -96    
272    -368   
0      -80    
-16    -128   
80     224    
-624   -80    
160    -624   
272    96     
-336   -400   
-352   -560   
80     208    
176    304    
-448   -144   
-160   -96    
-144   -288   
-32    -144   
-64    -912   
48     -16    
32     -432   
-208   -144   
192    368    
-16    64     
288    1952   
384    288    
-416   -784   
-160   -160   
240    128    
512    1520   
-912   704    
-272   -272   
-80    80     
128    208    
240    -176   
-128   320    
-208   16     
192    208    
176    240    
-192   208    
-176   256    
-32    288    
0      128    
32     -112   
-288   1024   
496    80     
-720   416    
-192   896    
128    144    
-32    -80    
-96    128    
-128   144    
-64    80     
144    64     
-16    -32    
64     -336   
-16    -80    
-176   32     
64     160    
-144   576    
128    -80    
-384   -320   
16     -16    
528    0      
-144   -16    
-48    176    
-224   256    
112    16     
-96    -144   
192    -192   
-320   128    
-208   64     
320    96     
-352   -592   
1632   -1248  
-400   624    
432    -848   
-32    -320   
-272   -192   
-176   -336   
-80    720    
480    -448   
-128   0      
-240   -176   
0      144    
240    448    
-80    -128   
-80    -176   
16     -112   
-32    192    
288    256    
-464   352    
208    -992   
0      320    
432    -48    
-2016  -144   
768    304    
-224   64     
-224   784    
656    1056   
176    1792   
-864   1952   
-304   384    
592    -448   
-640   -944   
-320   -640   
336    -704   
-352   -192   
-144   16     
-32    256    
496    688    
-400   624    
-64    192    
128    160    
16     176    
-96    288    
128    336    
-272   96     
208    32     
-128   -416   
32     -240   
-288   -1728  
-352   -944   
288    48     
-256   288    
-144   400    
320    224    
-48    -240   
-128   -256   
784    128    
32     1264   
-384   560    
-224   -208   
624    -272   
-304   32     
-208   192    
-128   -608   
-128   0      
208    -80    
-544   352    
464    176    
96     -32    
-224   416    
-256   96     
-192   2672   
368    16     
-656   128    
-272   -384   
368    624    
992    -208   
-1248  -320   
-576   -752   
816    -224   
576    160    
-416   32     
-688   -112   
384    -48    
480    48     
-64    -64    
48     -48    
-240   64     
592    512    
64     624    
-176   608    
16     128    
-176   -608   
608    -112   
-224   -112   
-16    624    
432    112    
-464   160    
208    -128   
400    208    
-208   384    
192    48     
-224   -16    
160    336    
320    -144   
144    128    
-16    272    
-64    -384   
80     192    
32     128    
-16    96     
64     240    
-64    256    
96     368    
-80    176    
-80    80     
16     -1040  
-640   -752   
112    192    
544    464    
48     192    
-400   -384   
640    -1408  
48     400    
-192   672    
176    336    
-80    112    
144    112    
160    144    
-144   32     
-32    192    
64     96     
0      -288   
-240   -192   
64     -80    
128    -96    
0      0      
-32    -112   
128    128    
-64    192    
496    -96    
-416   240    
144    128    
-64    -16    
208    96     
112    592    
-400   -304   
-32    -80    
352    224    
32     -96    
-336   -240   
-384   -1920  
224    544    
1056   80     
-1072  -432   
688    192    
240    192    
-560   352    
-128   -176   
80     160    
160    16     
0      48     
-48    -64    
-112   64     
112    240    
16     -368   
-16    -336   
176    96     
-112   256    
48     -512   
96     -48    
32     -304   
-192   -256   
-752   448    
1008   -256   
-144   96     
-288   160    
-64    80     
256    48     
32     16     
176    -16    
-288   144    
-144   16     
304    224    
480    -176   
-752   128    
128    -112   
176    -64    
208    64     
-224   144    
96     176    
0      128    
-64    80     
32     -576   
-16    16     
464    -64    
-592   32     
208    -144   
240    0      
-256   -160   
-112   -560   
256    -2288  
48     -112   
480    -160   
-608   -144   
-320   0      
912    240    
-128   208    
-304   -32    
176    -32    
-208   -144   
320    160    
-16    -32    
0      64     
-64    128    
512    192    
-432   -64    
96     112    
224    144    
-176   -912   
304    112    
-48    -640   
-704   -1504  
1696   -352   
-240   -784   
-672   16     
1184   128    
-224   96     
-288   -224   
240    -64    
192    256    
-224   -304   
-48    -208   
480    192    
-256   -128   
-112   256    
80     -224   
-64    -752   
48     -160   
-144   -176   
288    80     
0      -304   
32     -272   
624    -528   
-656   16     
160    -528   
256    64     
-48    -32    
240    1184   
-352   -384   
0      -96    
-192   0      
160    -96    
224    -128   
-64    144    
288    -176   
224    128    
352    -352   
-304   -592   
240    -176   
-432   272    
240    -16    
-96    -128   
320    64     
112    -144   
-240   -208   
0      96     
736    -96    
-16    80     
-336   -224   
-624   -1296  
-320   1056   
208    496    
-1744  -208   
416    -80    
1536   -192   
-864   -160   
-80    80     
-256   -208   
192    288    
224    -208   
-336   80     
128    -256   
-432   32     
192    -64    
112    -48    
240    -272   
-448   160    
480    -96    
-464   -16    
-160   -800   
208    208    
192    16     
-416   -48    
-256   160    
528    -352   
-688   -176   
128    -96    
-432   -64    
32     -704   
176    -464   
-336   -272   
-64    192    
32     -64    
32     -400   
368    -560   
-48    240    
-576   -352   
-384   -768   
448    -736   
-64    -944   
-240   -432   
48     -304   
96     64     
32     -304   
224    -464   
0      -928   
-688   96     
-432   -272   
272    -640   
48     -160   
-32    448    
368    -1168  
688    480    
-544   864    
432    336    
-416   304    
496    2032   
304    1216   
-320   -1168  
-16    -624   
-192   64     
-112   128    
0      -304   
304    480    
-416   -192   
112    -304   
-96    -448   
-272   -208   
0      16     
16     -384   
176    -96    
352    48     
-528   240    
304    -272   
-384   -400   
240    64     
-80    416    
256    -144   
-144   -48    
64     -224   
-80    192    
-192   848    
768    -144   
-528   352    
-16    144    
224    -16    
96     -176   
176    -112   
-224   0      
-240   224    
256    -80    
128    32     
-336   -192   
-176   -16    
-176   -176   
-176   16     
160    -304   
-976   96     
-96    112    
-320   -32    
-128   112    
464    -256   
-224   48     
816    -80    
-880   176    
-976   64     
192    288    
-144   304    
0      -160   
128    -384   
64     16     
160    464    
-192   64     
16     -128   
16     400    
240    112    
-880   208    
80     320    
48     912    
-208   304    
-96    -272   
176    -64    
-160   16     
-64    96     
176    -400   
160    96     
-80    160    
16     -160   
528    -16    
-560   352    
1536   656    
-2496  256    
-1312  -848   
1824   -720   
-656   -864   
-448   -80    
256    80     
400    -2080  
-48    800    
-16    176    
-48    -64    
-240   -96    
176    336    
96     384    
-512   -224   
128    -80    
192    80     
48     720    
-880   -128   
-288   -784   
144    -320   
288    1264   
1296   -32    
-1328  160    
992    64     
-272   -112   
-32    192    
-272   16     
976    -512   
-320   -96    
-272   640    
480    288    
-32    64     
-192   368    
64     144    
-80    -240   
-48    160    
-368   -608   
208    -384   
96     -48    
0      -528   
-112   -64    
240    -448   
256    144    
-608   736    
224    -240   
416    832    
720    304    
-496   464    
288    112    
-1040  -128   
464    -80    
224    128    
-272   256    
80     960    
-336   64     
-176   48     
144    224    
-672   128    
320    240    
272    -16    
-80    -96    
96     64     
-672   -64    
592    -256   
-752   -16    
-32    0      
-16    112    
-432   -400   
864    -448   
992    3232   
-1040  1632   
640    -112   
1136   -256   
-384   64     
-608   -80    
-384   336    
1312   -480   
-224   400    
32     -368   
-432   336    
544    -32    
-112   176    
-48    256    
352    272    
-624   240    
480    192    
-240   0      
-16    288    
176    128    
-224   1344   
464    608    
-128   16     
-944   32     
704    48     
-176   208    
128    208    
-464   96     
272    -128   
80     192    
-16    80     
-128   384    
32     16     
208    -80    
-128   32     
144    16     
16     32     
336    -16    
-224   -240   
-80    224    
80     128    
-16    96     
224    160    
-80    80     
-32    320    
-32    -384   
-448   -368   
400    -160   
32     480    
-96    464    
176    528    
-128   -352   
320    -592   
-288   64     
128    -96    
-256   -32    
-128   0      
-16    0      
176    64     
160    16     
48     32     
-144   80     
48     80     
32     -16    
-160   -96    
144    0      
160    384    
-160   544    
-224   128    
496    128    
32     80     
-176   0      
272    192    
-128   80     
64     112    
176    -208   
-80    128    
0      544    
160    -240   
-192   -64    
64     224    
-432   1200   
2608   -1056  
-1456  144    
-368   -272   
832    64     
112    160    
-528   224    
128    336    
32     -80    
80     224    
208    48     
-128   64     
-112   -48    
112    -192   
176    208    
80     544    
-144   -128   
192    80     
-80    304    
112    -64    
528    416    
-1472  240    
608    -144   
592    112    
-752   -192   
96     448    
192    -96    
-160   -192   
48     192    
304    48     
-432   16     
64     -32    
-48    64     
160    -256   
-224   160    
432    416    
-256   80     
-48    160    
80     -96    
-160   128    
128    96     
-32    80     
-192   96     
80     80     
-32    -48    
-304   -16    
64     -240   
64     160    
96     -800   
-448   -656   
752    -784   
80     -544   
272    256    
-336   -112   
112    400    
32     -16    
-96    800    
-16    160    
-176   128    
-64    32     
48     96     
96     32     
112    128    
80     -544   
-656   -32    
656    224    
-352   -16    
256    112    
432    96     
-208   96     
112    144    
-512   -784   
320    -48    
624    -288   
-1088  -368   
576    256    
288    -224   
-192   64     
-496   -816   
336    112    
288    -1728  
-96    80     
176    112    
-192   64     
-144   -208   
208    160    
128    48     
-160   -16    
64     224    
128    128    
96     128    
16     -256   
384    464    
672    -672   
-960   336    
752    -272   
-400   64     
-256   -624   
768    304    
-528   176    
-240   32     
384    144    
256    80     
16     -80    
-224   240    
-160   160    
320    16     
-80    256    
128    -240   
-288   48     
304    -288   
288    480    
64     -784   
-608   272    
400    48     
272    656    
-80    112    
-192   0      
-176   224    
528    960    
1168   -1056  
-2432  -960   
976    -208   
800    -752   
-16    160    
-464   32     
368    688    
-528   992    
304    -144   
528    400    
0      -64    
-400   64     
80     240    
112    320    
16     -208   
176    -64    
48     -144   
-240   32     
-16    -944   
544    -784   
-208   -512   
-64    32     
-288   -1136  
528    -848   
-160   -320   
-432   -80    
144    -800   
-384   -1040  
576    256    
-128   384    
-32    -128   
-128   -352   
448    256    
64     272    
-224   528    
64     208    
96     128    
128    -944   
288    -1728  
-256   464    
128    32     
128    64     
-688   336    
320    -608   
-768   -1328  
128    -1200  
0      -192   
192    224    
128    288    
-240   -224   
128    64     
448    256    
-1360  400    
736    -304   
176    832    
-496   144    
80     320    
-336   496    
32     -576   
160    96     
-32    -528   
160    48     
-176   -272   
112    16     
-320   -1024  
-112   -112   
448    -224   
0      256    
-32    32     
384    48     
32     0      
-16    -304   
-144   0      
112    -128   
-16    80     
-48    -64    
288    -144   
128    -672   
64     -320   
128    -1168  
-80    64     
-448   -384   
496    -304   
-640   64     
368    -48    
112    208    
-64    -368   
448    -528   
256    -208   
-96    224    
-32    -112   
112    -128   
-64    -112   
-64    0      
0      144    
288    96     
-96    -144   
-192   -96    
112    -64    
144    160    
64     0      
-624   32     
512    -128   
-704   -80    
-272   -224   
224    -64    
224    64     
-480   512    
368    304    
112    -64    
-160   144    
80     -976   
-128   352    
224    192    
-96    144    
16     128    
-48    256    
-32    176    
-208   160    
144    704    
-144   16     
-112   -208   
240    32     
-64    0      
-160   -256   
-144   48     
-48    -288   
320    112    
-320   -256   
272    64     
-416   -384   
1536   -720   
160    592    
-880   -512   
368    -880   
544    -480   
-736   192    
912    240    
-368   832    
-112   -208   
-32    304    
480    -608   
-64    -32    
-80    -1728  
-128   320    
368    160    
-80    128    
-240   112    
64     48     
304    288    
-144   -112   
528    656    
-1744  -208   
208    544    
288    -960   
-1008  -976   
1056   -1136  
-1280  -848   
976    512    
240    480    
-272   288    
48     -16    
-160   96     
272    352    
-48    144    
-464   -256   
80     192    
224    240    
-432   -16    
64     -64    
-96    320    
384    -304   
64     448    
-768   -224   
352    176    
448    208    
-544   -576   
480    48     
176    304    
272    -128   
-256   -128   
-16    400    
272    -160   
176    288    
-608   -336   
-288   -48    
-1056  -272   
528    -224   
-320   896    
304    144    
288    32     
-160   48     
-192   32     
32     96     
-384   48     
352    64     
-496   80     
-352   -128   
144    64     
-16    -448   
-464   -3024  
832    -2560  
992    480    
-352   -224   
-1280  0      
-128   208    
544    -304   
112    256    
-464   -160   
-720   32     
432    -48    
128    192    
-368   -272   
432    384    
-448   -256   
336    384    
16     -96    
-304   80     
64     -64    
64     1168   
384    224    
-896   528    
256    -128   
384    -48    
-16    -80    
-1440  16     
640    80     
-816   -352   
336    -224   
-80    -32    
16     176    
16     48     
-192   16     
64     160    
-96    -96    
-416   48     
368    -144   
-592   -64    
448    48     
-736   -32    
-64    64     
336    32     
-384   16     
160    112    
-576   -304   
624    96     
-480   128    
48     288    
-144   64     
-160   -144   
0      -32    
-128   16     
384    480    
544    -304   
-720   -160   
112    -64    
-16    160    
-320   -32    
160    80     
-48    -288   
-256   -16    
64     224    
-48    -48    
32     48     
-224   176    
112    96     
256    -128   
-304   96     
496    752    
-672   336    
32     -160   
32     0      
-1088  -80    
-112   64     
96     128    
144    64     
-176   272    
-32    -384   
-128   -560   
16     48     
48     240    
-1008  -752   
1200   -496   
0      -304   
-768   -144   
864    128    
256    272    
-1216  784    
176    176    
-96    -288   
192    128    
96     320    
-432   -304   
-32    336    
208    -32    
176    -224   
-112   0      
-320   208    
0      -32    
288    128    
-112   -32    
384    528    
-1488  512    
656    -272   
144    -32    
16     80     
0      80     
-320   -176   
-112   400    
288    0      
-80    32     
-208   -32    
-80    96     
-112   -160   
112    0      
48     -144   
-192   0      
48     -32    
48     -256   
-352   176    
112    0      
-96    304    
0      0      
160    96     
-160   -144   
272    80     
-336   -32    
192    208    
-32    128    
-32    96     
-880   -1904  
1408   256    
3184   368    
-2032  432    
48     -384   
1824   48     
-1312  -16    
-144   448    
800    368    
-192   144    
-80    64     
-144   128    
272    96     
0      48     
-144   32     
288    80     
0      96     
-208   80     
144    112    
-112   -144   
320    128    
-368   -272   
976    592    
144    224    
-656   16     
928    496    
0      416    
48     -32    
-112   240    
320    -64    
-112   160    
-416   96     
-48    -272   
-16    112    
368    80     
-112   208    
368    64     
-272   -16    
480    368    
-112   208    
-144   48     
80     -96    
16     16     
384    64     
-368   592    
240    -352   
-32    -16    
288    688    
912    -400   
-528   160    
816    80     
-128   352    
48     80     
-176   -48    
-112   -208   
384    -160   
640    -256   
-272   256    
-416   592    
368    -112   
-96    -256   
-528   240    
400    -48    
-48    160    
112    320    
112    -208   
-96    416    
560    64     
-96    64     
64     240    
-96    336    
128    -2752  
-1424  -528   
-176   48     
336    -288   
160    -80    
-16    -688   
-64    496    
-448   -432   
512    -1152  
-144   -240   
-48    176    
-48    -272   
112    336    
304    64     
-144   592    
-128   832    
112    112    
-208   160    
320    -272   
-48    400    
48     -272   
-80    -48    
592    288    
-288   208    
144    624    
128    384    
-176   720    
16     1008   
48     160    
416    592    
-320   48     
-352   -336   
-272   -752   
64     -64    
464    1088   
64     576    
-272   544    
336    -160   
32     -400   
-48    848    
-128   0      
-256   368    
224    -144   
112    240    
-160   416    
0      -400   
-64    -368   
-272   -272   
416    384    
-96    112    
-288   -672   
832    -288   
-960   -96    
256    112    
-64    -112   
-320   -528   
-112   816    
272    1904   
128    1040   
-16    -144   
64     -112   
0      240    
192    -368   
112    -128   
160    192    
-96    176    
16     352    
-112   -224   
-48    176    
96     -1552  
160    16     
-96    -64    
-64    112    
96     -48    
64     -224   
-48    -32    
336    -416   
-272   -352   
-96    -80    
-16    336    
-64    -256   
368    64     
-64    -272   
192    -96    
-288   -304   
96     448    
-128   208    
432    576    
-64    1008   
-144   320    
208    144    
144    -64    
-64    32     
0      224    
224    288    
-64    -176   
-64    16     
176    -672   
96     -96    
96     -192   
384    592    
-752   464    
320    -224   
560    -80    
-432   480    
128    192    
-32    240    
-144   752    
224    -368   
400    -464   
-480   288    
-48    352    
128    144    
464    48     
-48    -384   
-400   -400   
-48    784    
384    -1296  
256    592    
-144   -416   
-128   -1200  
-16    -304   
304    -2672  
208    -608   
-224   -192   
-128   -144   
240    256    
288    0      
-272   -176   
336    -608   
-608   -2240  
-640   128    
1040   -896   
-1216  -144   
384    240    
-496   -32    
288    -160   
16     0      
-112   176    
128    -144   
160    64     
-48    48     
-80    -288   
208    -272   
272    176    
-48    64     
-112   96     
304    176    
16     -176   
-320   -208   
64     -144   
-16    -448   
-1104  976    
1008   -192   
80     0      
0      -400   
-208   -2672  
400    64     
-1056  64     
576    -160   
96     -48    
-368   144    
272    -144   
-64    -48    
-320   32     
416    -192   
-176   -16    
112    32     
-144   -96    
80     -160   
-48    -48    
272    -32    
-256   -352   
-128   256    
-288   -208   
208    -576   
432    -48    
224    -576   
112    -304   
-544   672    
224    48     
-800   0      
544    -224   
224    -160   
-336   -896   
240    -160   
304    48     
384    16     
-16    80     
432    128    
-176   -224   
352    48     
512    368    
-384   -32    
-32    16     
368    320    
800    -448   
-592   48     
208    -64    
592    -304   
-1536  -2784  
-1856  -800   
1376   256    
-128   -1120  
-192   -144   
-112   128    
-32    -176   
-240   256    
512    128    
-352   -144   
16     -48    
16     -208   
-176   -176   
-448   112    
0      -192   
384    16     
-32    -464   
-320   32     
480    -656   
-432   208    
160    336    
592    -176   
-576   64     
-656   -240   
-480   -112   
640    224    
-320   240    
144    -64    
-400   16     
144    -112   
400    -16    
-96    -96    
112    176    
-240   -32    
-112   -320   
64     240    
352    -96    
-608   -112   
960    -416   
-352   -48    
208    160    
-208   192    
-96    -48    
304    -80    
-192   -208   
64     -176   
-528   -592   
544    112    
48     -112   
304    400    
-288   48     
336    944    
-768   320    
304    -272   
-112   -368   
-480   -128   
112    368    
512    -96    
-176   -32    
-320   -48    
112    80     
288    -272   
-208   -32    
-112   -288   
-656   32     
0      48     
-48    96     
32     -192   
16     -240   
-320   96     
416    432    
224    -48    
-192   -368   
-144   112    
-240   112    
272    0      
-624   -96    
-288   -256   
-208   -288   
-176   0      
-336   -352   
1360   1696   
64     -80    
-1920  240    
864    48     
-256   0      
16     64     
16     192    
144    544    
48     -704   
-128   0      
336    16     
48     0      
-112   192    
-96    -320   
224    -400   
-432   432    
208    -80    
-528   -112   
-16    272    
32     48     
-432   -992   
448    -80    
96     480    
-1088  -192   
688    -32    
-48    -64    
288    272    
-288   496    
144    -80    
-16    96     
16     0      
-128   -48    
0      368    
256    48     
-336   160    
-32    -64    
-416   -32    
112    128    
-48    224    
144    16     
-176   -80    
-96    -48    
32     96     
-32    -96    
128    0      
-384   -64    
352    0      
-176   240    
-208   -112   
-896   -1472  
1792   112    
-912   -32    
-432   -288   
1232   32     
-880   -144   
384    -384   
80     -96    
0      0      
32     336    
-224   160    
176    144    
16     0      
-112   -48    
-144   -144   
16     96     
128    64     
-416   -32    
80     16     
96     -160   
176    208    
192    1248   
-1056  -384   
-368   448    
288    272    
-272   -416   
-16    64     
-32    96     
432    576    
320    0      
-224   -208   
-720   272    
-16    -80    
384    -32    
-1104  -336   
-208   -32    
176    240    
-80    -112   
416    -352   
-48    208    
-96    176    
-160   16     
32     48     
240    -48    
96     -80    
-128   112    
128    -272   
-528   -560   
-816   944    
0      544    
-720   304    
48     -128   
-80    -416   
16     -240   
-160   320    
432    80     
-288   -832   
-80    464    
-400   0      
-128   -80    
112    272    
-32    128    
-112   -320   
-96    -128   
-224   -96    
-48    -112   
592    336    
352    288    
64     0      
-240   400    
-288   96     
1072   2832   
-944   1040   
-528   -880   
1968   48     
-1040  1152   
-816   320    
704    -464   
432    608    
-464   -640   
-400   208    
96     80     
224    432    
224    -112   
-16    -192   
-272   480    
48     -480   
-240   -192   
32     176    
-256   384    
304    896    
-16    320    
-288   -512   
368    -16    
-304   -16    
96     656    
224    1744   
-432   32     
16     1392   
352    448    
-128   -176   
-96    160    
-272   -160   
16     112    
80     -256   
288    384    
-32    784    
-432   -80    
64     -800   
528    176    
-144   224    
-160   128    
-368   -432   
272    832    
96     -96    
32     -16    
-48    480    
64     -416   
304    160    
32     816    
-144   368    
-128   352    
64     672    
1216   608    
-544   528    
144    720    
-160   576    
368    16     
80     336    
64     656    
-208   208    
-32    -80    
368    96     
112    -144   
-576   128    
-176   -256   
320    -80    
16     368    
160    128    
-688   496    
-16    80     
48     80     
144    112    
-32    240    
-144   400    
272    96     
-64    -624   
320    96     
-256   -112   
48     -432   
48     -272   
-192   -592   
992    -832   
-176   368    
-80    -640   
-208   -96    
-208   192    
256    16     
320    400    
288    336    
-304   -352   
-208   240    
208    80     
192    64     
16     80     
-304   -272   
112    -160   
0      256    
144    192    
16     0      
-176   192    
-128   -240   
656    -80    
-336   -288   
-16    -992   
-192   304    
304    -576   
80     544    
0      -272   
-64    96     
0      -256   
16     -896   
192    32     
176    -544   
-176   16     
-32    336    
128    -80    
176    528    
-208   432    
-64    288    
176    288    
-64    -176   
96     144    
176    96     
-48    96     
96     128    
0      -48    
-208   144    
240    -16    
-64    128    
-512   -160   
1456   -848   
-2064  -272   
736    -256   
-48    -48    
-800   -160   
752    416    
240    112    
-400   960    
304    160    
-144   240    
64     -32    
96     48     
112    -80    
-112   0      
-224   -416   
400    112    
-208   -144   
176    256    
144    144    
16     96     
-144   -16    
176    -192   
928    112    
-1696  0      
976    160    
160    -192   
-656   144    
368    -240   
-256   -288   
464    -208   
-112   64     
32     -1008  
176    96     
64     48     
384    192    
-640   -16    
48     80     
256    208    
256    -512   
80     -208   
528    -16    
-16    -64    
608    400    
-80    16     
-144   -288   
416    464    
-480   32     
-544   240    
-400   400    
80     -144   
-784   -240   
512    32     
160    64     
-96    256    
320    432    
-80    352    
-192   384    
-16    352    
-96    416    
64     64     
592    -144   
384    -592   
-64    256    
-240   80     
288    240    
-112   -496   
-80    -336   
592    384    
352    -272   
-640   128    
2064   1328   
-896   1408   
544    -96    
880    -336   
-624   -112   
-304   368    
432    -64    
560    -256   
-112   -64    
-752   -224   
-144   304    
160    -128   
272    -320   
-160   -160   
16     -784   
112    -128   
176    64     
16     -144   
48     160    
-576   688    
1168   -576   
-864   384    
448    -384   
-752   -160   
352    64     
272    48     
-752   512    
864    208    
-432   176    
-144   -528   
16     48     
192    -1168  
-32    112    
432    64     
-736   32     
592    160    
-288   -96    
48     -208   
112    -96    
0      48     
224    -256   
-672   -256   
240    -352   
-16    176    
-400   -592   
496    -464   
128    -128   
-224   -112   
48     -2800  
208    112    
80     -32    
-80    80     
336    -352   
-368   688    
640    608    
176    112    
-720   -112   
32     -80    
-512   32     
272    -112   
-16    128    
-160   160    
320    -144   
0      -464   
-16    160    
128    192    
144    208    
368    -64    
-256   -384   
112    -480   
-16    -464   
-208   -32    
80     192    
272    -96    
-128   -96    
-64    -128   
-32    -480   
96     -992   
-80    -480   
0      224    
0      -96    
144    1472   
2112   -1136  
-1936  96     
464    96     
416    480    
-80    -496   
-304   -208   
16     -80    
32     -288   
-768   -96    
144    -368   
-48    128    
-144   -192   
224    -256   
144    -2576  
-32    288    
-272   -64    
32     -32    
80     32     
112    -64    
-144   -752   
112    -208   
16     240    
-272   320    
-160   416    
368    144    
0      224    
-80    64     
80     320    
0      -192   
0      -144   
16     -64    
128    -176   
-208   -112   
304    0      
-208   -16    
-240   112    
112    400    
144    560    
-304   416    
0      -288   
144    -16    
0      16     
64     32     
16     -160   
-80    176    
224    -224   
-176   96     
-112   -432   
-656   -448   
608    96     
1728   512    
-1360  -64    
224    -48    
-32    -192   
-16    -704   
368    784    
192    784    
0      160    
-368   -272   
304    112    
256    0      
-480   -336   
336    -272   
64     -272   
-496   0      
112    -112   
144    -80    
-272   464    
-64    896    
656    1472   
-1264  -800   
-1296  288    
2240   1088   
-832   96     
-640   592    
352    848    
-1200  240    
-48    -96    
176    320    
128    96     
-240   176    
0      -208   
144    -32    
-48    464    
-272   -112   
272    160    
-192   64     
112    528    
-16    128    
-64    368    
-48    176    
192    16     
608    416    
320    48     
-208   -592   
-112   -416   
496    -528   
-192   -1328  
-256   -480   
16     240    
-656   -416   
16     -1040  
704    432    
-208   -144   
-592   -208   
-32    -1104  
-176   -784   
368    -432   
-608   -48    
464    -400   
80     -144   
48     112    
-640   176    
-16    -112   
-592   -256   
400    -32    
-384   -464   
-128   -640   
-96    208    
832    784    
-2496  -192   
-144   -288   
2368   -1296  
-464   -448   
-624   1040   
-544   -240   
720    -1568  
48     208    
224    224    
-352   -208   
-368   -112   
576    -592   
192    720    
-256   -32    
-176   64     
64     160    
-352   -144   
96     -160   
64     -400   
-192   64     
-208   -64    
384    304    
-784   -192   
-112   352    
176    288    
-480   592    
208    1168   
0      496    
96     -832   
-64    112    
-352   -64    
-16    224    
400    -208   
-352   112    
32     208    
64     544    
-144   656    
16     -784   
272    -608   
-752   80     
-240   400    
352    208    
-240   64     
-208   272    
272    -848   
-176   -432   
-192   -784   
32     64     
176    400    
-592   -320   
656    -848   
-208   192    
-560   320    
368    480    
-1504  -592   
-448   -1744  
48     -656   
160    816    
-32    768    
48     464    
-16    -16    
-96    240    
48     288    
48     128    
-48    224    
-48    -224   
-336   -384   
-320   -240   
368    -32    
-1040  -112   
144    224    
64     272    
-176   208    
384    160    
-336   240    
-32    -608   
64     -112   
128    368    
80     320    
-16    -1552  
-784   240    
736    -624   
-832   1120   
960    -176   
-560   80     
272    608    
-176   -32    
112    -608   
-16    -384   
-80    -32    
-80    -32    
32     208    
128    272    
-64    176    
-96    -192   
-240   -704   
80     -832   
0      -32    
224    112    
64     624    
-784   -192   
480    368    
304    -32    
-576   208    
512    -32    
-416   400    
112    304    
96     -160   
-80    240    
32     -160   
-160   32     
64     -16    
-64    16     
-224   16     
-32    192    
256    -32    
-128   272    
240    -304   
-304   208    
224    48     
-240   96     
128    80     
-48    -32    
64     -96    
368    144    
-208   32     
16     272    
112    32     
-336   480    
-800   2384   
2640   464    
-1184  400    
-48    -384   
832    192    
-320   256    
-288   352    
304    432    
320    16     
-416   112    
144    80     
-48    -32    
-64    32     
304    64     
160    112    
-176   208    
144    64     
176    112    
-208   112    
-272   160    
208    112    
-128   -448   
-1232  752    
1328   -224   
112    64     
-528   -32    
208    80     
480    0      
-880   48     
240    272    
64     128    
80     80     
16     48     
-80    272    
448    -144   
-816   304    
624    240    
-224   -224   
-272   16     
368    128    
48     -64    
-96    -192   
672    48     
-336   -368   
-112   208    
816    -544   
-800   -96    
688    320    
-336   -16    
-208   0      
288    16     
256    96     
-336   -240   
-320   112    
48     -304   
560    112    
-336   224    
-240   -1248  
144    -384   
48     -144   
-288   128    
64     -240   
-96    304    
-96    128    
-48    96     
-176   352    
736    16     
-560   -16    
-464   64     
864    1264   
-944   -2752  
-1600  608    
2128   272    
-1312  96     
32     48     
960    -96    
-576   64     
-544   -80    
752    -256   
544    -96    
-208   112    
-256   16     
-128   192    
448    64     
80     144    
304    -80    
-688   224    
432    -144   
-384   -192   
1056   -448   
-400   112    
-64    -640   
32     128    
-672   -176   
352    48     
-240   -96    
192    144    
192    -48    
-240   560    
528    416    
-272   64     
112    -64    
128    -64    
224    240    
-192   -704   
32     208    
-48    -1344  
368    288    
48     160    
-32    112    
144    96     
-128   -80    
400    16     
128    176    
-304   240    
144    112    
112    128    
144    160    
-272   256    
304    -48    
96     96     
144    416    
-448   320    
32     -1184  
256    -1120  
-496   -176   
32     480    
-32    -368   
-64    -272   
352    224    
192    224    
16     160    
64     -304   
64     432    
-160   112    
160    48     
32     -368   
256    160    
-160   -80    
240    64     
-48    -304   
496    608    
-720   608    
384    -64    
448    -224   
16     -704   
-336   656    
-192   -48    
336    -896   
80     -192   
-96    384    
-464   1200   
1520   -416   
-1072  -16    
32     384    
464    -480   
-304   -320   
0      -1152  
-48    768    
256    -512   
-224   64     
160    320    
96     -192   
0      288    
176    -288   
32     -160   
-48    -448   
80     144    
-80    144    
32     -1024  
-16    -48    
-48    -1312  
208    -640   
-80    864    
-480   576    
336    48     
352    -1744  
-432   32     
-16    -400   
336    -192   
64     -16    
-32    208    
-64    96     
-16    320    
48     -384   
144    -304   
-240   80     
-32    -512   
272    -416   
32     944    
-128   224    
-80    -192   
80     -320   
96     -880   
304    0      
-400   256    
192    160    
-144   -176   
-96    -112   
352    -384   
32     192    
-1456  112    
2400   208    
240    -352   
-1376  256    
592    624    
592    112    
-416   304    
304    -816   
144    560    
-192   -3808  
48     448    
224    -320   
-160   160    
128    -80    
336    304    
0      -64    
-192   -208   
224    -96    
496    128    
-608   -96    
720    1168   
-1136  -304   
-80    448    
528    656    
-416   224    
496    320    
-352   -672   
-208   112    
400    1040   
-32    1056   
-224   144    
32     -704   
-48    -352   
-112   -288   
272    -816   
-224   -416   
32     160    
-32    -80    
-592   224    
368    -896   
64     -64    
-208   -672   
416    -752   
-560   -464   
-544   -944   
208    -1008  
-160   -832   
928    -1584  
144    -896   
-144   -512   
96     112    
-1296  -80    
-16    496    
-416   -256   
1072   -336   
-256   96     
192    -2032  
320    -704   
-400   -496   
688    -336   
-112   -96    
-32    256    
-160   -224   
-32    -256   
160    -32    
-160   0      
-160   -96    
-64    496    
464    656    
-144   64     
816    144    
-1904  -912   
288    384    
624    -736   
-304   -48    
-448   176    
-448   64     
800    704    
240    -848   
-688   -224   
-256   -80    
256    128    
304    -160   
-32    -416   
-384   -528   
-480   368    
512    176    
-160   -64    
-96    -544   
-592   -992   
80     -368   
336    -160   
-464   128    
576    240    
-352   -64    
-80    -32    
336    496    
64     496    
304    -80    
-32    544    
-128   576    
224    240    
-512   80     
416    864    
-320   304    
32     -320   
-16    -208   
-96    672    
352    368    
-80    32     
-64    -224   
64     -80    
32     -16    
256    208    
96     944    
-32    1056   
-512   336    
224    528    
16     640    
-112   352    
-400   272    
-672   -160   
976    64     
-240   -544   
-496   80     
192    -336   
-64    -320   
-208   -384   
-80    -256   
-576   -624   
176    16     
-96    32     
-80    -224   
-224   -208   
32     32     
160    576    
-544   240    
320    1056   
-1168  992    
32     288    
-272   192    
192    240    
-256   48     
112    96     
144    -144   
80     80     
-656   224    
320    288    
272    240    
-224   -64    
496    1600   
-1104  -320   
432    80     
400    16     
-240   -304   
-480   128    
240    -48    
272    -160   
-288   -272   
16     -352   
0      336    
-48    96     
240    112    
-192   -112   
-336   -592   
64     -112   
-416   528    
192    -144   
-208   0      
64     -320   
-528   96     
496    1584   
96     -128   
-528   -112   
672    -272   
-272   -336   
48     128    
16     224    
128    208    
-384   32     
112    96     
192    32     
-128   224    
-96    -144   
-112   64     
-480   -208   
288    64     
0      -64    
0      208    
80     48     
-304   48     
384    96     
-48    80     
128    112    
-304   -64    
544    160    
-464   -208   
48     224    
336    80     
-384   16     
-592   -1216  
-432   48     
-256   80     
-160   240    
160    -144   
-224   0      
208    128    
48     240    
160    112    
-256   -80    
288    144    
-144   -160   
-256   144    
400    48     
-512   144    
-128   48     
368    112    
-1360  -176   
-400   160    
0      240    
80     80     
240    304    
640    -112   
-2144  160    
1360   432    
208    -176   
-1888  320    
1232   368    
-752   -16    
-224   -160   
80     -128   
80     128    
-240   -48    
-32    112    
160    128    
80     16     
-400   160    
176    -128   
-32    352    
-336   272    
32     128    
80     32     
-608   -592   
240    -32    
432    80     
-1088  128    
912    32     
80     -416   
-48    -624   
-160   320    
336    288    
-352   0      
16     -144   
-272   160    
160    -48    
736    336    
-16    -208   
-160   48     
128    -48    
-352   -192   
96     112    
224    96     
-240   48     
144    80     
-160   0      
-80    -288   
256    352    
448    176    
-320   96     
160    240    
1184   6208   
32     1088   
-928   -560   
1840   -576   
-752   64     
-432   272    
272    -16    
544    0      
-80    96     
-352   192    
752    112    
-448   144    
32     208    
336    -160   
-400   64     
-112   0      
16     0      
176    160    
-80    112    
272    1456   
288    1088   
-544   336    
176    -80    
16     32     
-576   0      
800    176    
-416   240    
-208   -176   
272    16     
-48    -608   
-16    -208   
-256   -32    
-32    -64    
-240   -80    
240    32     
160    272    
-16    1120   
624    320    
-432   32     
48     16     
176    96     
-32    -288   
384    -320   
-240   64     
-96    80     
256    -96    
-432   176    
464    -80    
-96    288    
304    1040   
224    624    
-112   224    
208    0      
-496   48     
240    -192   
-128   64     
160    384    
576    -912   
-96    -912   
-192   -752   
96     -560   
-144   -400   
-16    -64    
0      432    
16     -16    
48     -208   
-16    -208   
160    400    
32     64     
-176   144    
64     208    
48     592    
80     176    
-64    304    
-32    -144   
-64    128    
16     -160   
32     -16    
64     336    
80     -272   
-96    192    
256    432    
-304   1024   
400    -208   
176    -448   
272    -240   
-272   80     
-48    -384   
112    -128   
-176   224    
-96    -16    
128    -16    
80     -128   
0      16     
32     -368   
-16    16     
16     -80    
-16    336    
384    -32    
80     288    
-240   160    
-32    -256   
-528   -272   
624    384    
-496   160    
368    -304   
-96    -96    
-16    -432   
-16    -16    
272    -176   
128    96     
-240   0      
-192   224    
192    -1360  
-80    368    
112    -192   
-80    -32    
32     64     
-128   224    
-16    96     
48     16     
-192   -96    
-160   -256   
112    224    
160    -80    
-368   320    
176    -272   
48     144    
-288   -256   
240    160    
208    80     
-1184  1680   
3200   -864   
-912   64     
-912   -336   
912    -608   
368    -224   
-480   -432   
624    -352   
-320   128    
-256   544    
320    224    
384    -208   
-288   32     
80     272    
96     -144   
128    192    
-80    400    
464    432    
-144   -224   
-160   32     
960    1472   
-1008  -784   
-816   336    
1120   -1264  
-880   -544   
512    224    
208    1456   
-320   352    
288    -256   
-128   -736   
-160   0      
80     96     
48     368    
208    352    
-144   48     
192    256    
-80    -496   
-48    -288   
384    -624   
-240   240    
-192   -16    
112    112    
208    368    
-64    928    
-432   -944   
640    -896   
-144   -32    
224    -576   
-896   -752   
896    -144   
-48    -704   
-464   208    
304    32     
-144   128    
-384   -176   
784    -128   
32     1088   
-352   -48    
256    160    
96     352    
464    -112   
-480   96     
-128   -272   
736    -464   
-112   -496   
464    -1760  
-672   224    
304    -768   
960    -320   
-464   -2768  
-416   2064   
992    208    
-1104  -352   
112    1856   
496    1440   
80     -208   
-160   -144   
-176   -1120  
-352   -512   
-80    64     
0      96     
-256   272    
-128   -880   
176    -256   
144    -1424  
-64    -16    
96     80     
400    64     
16     1008   
240    -176   
-224   -624   
-96    -512   
288    448    
656    -160   
-656   64     
240    -160   
-48    416    
336    -160   
64     -80    
-48    -656   
80     272    
-32    -1664  
0      -272   
288    -48    
-48    16     
-352   96     
512    480    
-96    48     
-64    64     
192    -224   
-96    176    
-848   480    
-272   400    
-240   -16    
544    -144   
-208   -560   
-560   -1072  
384    -240   
144    -192   
96     -16    
-128   64     
336    576    
672    128    
-624   -688   
-176   -352   
208    -48    
-160   -192   
192    16     
-128   -352   
-144   -176   
-176   32     
96     -752   
192    192    
-96    -80    
-144   -176   
512    -544   
-64    16     
-192   -240   
384    -480   
-272   288    
32     -192   
144    80     
-48    176    
-304   256    
96     -240   
-48    -464   
-32    -112   
96     160    
80     -528   
48     32     
48     -2208  
-1856  1264   
1648   160    
-416   320    
208    -96    
144    -240   
-496   -336   
-288   -32    
80     416    
304    -240   
-176   112    
-336   -160   
176    16     
448    -1264  
-576   432    
32     -416   
176    224    
-224   112    
64     -16    
-64    -80    
240    688    
-1088  -560   
-160   256    
1520   128    
-512   -352   
16     416    
-192   -48    
144    80     
288    -288   
16     208    
-304   128    
-64    16     
-112   -48    
304    -272   
-160   -64    
-32    16     
64     368    
112    96     
-320   -96    
-304   -192   
144    128    
128    -224   
64     176    
-128   -272   
-448   128    
-640   -48    
-608   64     
-80    0      
48     -16    
-256   -1296  
32     2288   
5024   1824   
-1344  -480   
-1392  128    
512    -384   
176    128    
144    -48    
-688   48     
736    256    
-464   96     
160    -16    
0      64     
64     80     
-528   208    
624    208    
-208   112    
-208   -64    
16     176    
-16    224    
-144   -16    
0      144    
-704   -784   
368    -160   
48     -752   
48     -144   
-560   160    
528    -112   
-528   400    
-368   -144   
352    240    
-272   -112   
80     64     
-128   16     
-128   160    
-16    80     
608    48     
-160   -128   
-112   128    
-128   96     
96     160    
208    32     
-272   -240   
560    16     
-416   -208   
0      0      
32     32     
-752   224    
320    -208   
96     160    
-624   -96    
192    -48    
-240   -464   
544    -128   
-16    320    
-448   -400   
160    16     
96     64     
-496   -240   
544    160    
-160   80     
32     -16    
128    144    
-304   -144   
32     144    
80     -64    
208    432    
288    -64    
-400   80     
288    176    
224    656    
-832   -2144  
-1840  -624   
864    -96    
208    16     
-64    -32    
-64    576    
-656   752    
192    -48    
-32    16     
96     -16    
64     -144   
-144   400    
192    -272   
-192   288    
128    -256   
224    320    
-128   0      
-112   32     
-208   -768   
80     -400   
16     736    
-160   448    
-368   -144   
32     160    
144    -336   
-336   368    
352    320    
-128   1200   
144    1152   
-64    -688   
-432   -640   
256    176    
112    416    
80     -128   
-352   -32    
-192   0      
128    128    
-192   -176   
-64    64     
-448   -240   
-144   352    
576    656    
-224   768    
272    1376   
-384   496    
208    -208   
112    -96    
16     -400   
288    -656   
-288   240    
224    144    
368    -432   
-960   432    
1008   752    
-832   448    
304    512    
288    -48    
32     -1808  
-288   -416   
32     768    
208    -512   
-240   192    
160    112    
0      144    
-336   192    
32     64     
240    -128   
16     -128   
16     -144   
224    16     
0      80     
176    144    
32     64     
-208   128    
-32    32     
-48    96     
688    -208   
96     192    
-464   -16    
96     288    
176    -80    
672    224    
-1184  592    
368    -32    
352    16     
16     -64    
208    96     
304    224    
-752   528    
368    160    
400    -128   
-96    -16    
-208   240    
-144   -48    
96     144    
288    -16    
-192   -64    
-272   -32    
96     -16    
304    -96    
64     64     
-816   640    
736    -208   
-752   -80    
432    192    
16     320    
-192   -416   
464    -976   
-208   -224   
16     160    
-208   16     
208    272    
-16    576    
32     -96    
-32    -128   
-192   16     
176    176    
352    240    
-272   336    
-224   64     
128    16     
144    144    
-240   -16    
-128   272    
-16    576    
-144   336    
176    128    
256    80     
-240   48     
208    112    
16     128    
496    1008   
1712   144    
-1296  96     
496    96     
-80    640    
-64    1280   
304    -608   
-80    -1440  
-112   608    
272    688    
144    -80    
64     240    
64     144    
-64    528    
-32    -112   
160    -224   
80     -224   
-80    -1088  
-112   -832   
208    16     
496    384    
-1952  608    
912    416    
-272   -64    
-176   -720   
320    -816   
80     464    
-416   448    
-144   464    
240    -560   
-48    -80    
-16    112    
-336   320    
560    64     
-128   -208   
-544   192    
432    192    
-224   608    
800    192    
-16    32     
-304   -64    
16     -16    
-384   320    
-848   -3008  
-368   -1376  
1120   432    
-560   384    
-384   624    
944    -480   
-448   80     
-240   -48    
112    240    
128    -160   
96     -48    
-16    656    
-1104  352    
256    -64    
-128   -656   
-240   64     
-32    608    
608    -256   
-320   192    
-48    -112   
48     176    
336    32     
96     -400   
-560   128    
464    -16    
592    736    
-688   848    
-1328  -1136  
176    0      
-240   -416   
-96    208    
1136   -1232  
-208   368    
-976   704    
752    160    
-256   256    
352    -144   
-96    160    
-208   -256   
368    384    
-64    -224   
-144   256    
160    -112   
-64    176    
352    -192   
-304   -736   
-576   -1840  
448    -16    
-176   -896   
592    336    
384    -64    
-768   144    
448    16     
144    192    
-64    -112   
176    224    
-16    -32    
-272   192    
576    176    
-448   -512   
32     336    
272    -64    
256    144    
-608   -1056  
128    -96    
-64    32     
160    208    
-272   32     
240    64     
-128   -64    
224    -400   
208    48     
-224   -384   
-32    -160   
32     -352   
128    80     
0      16     
-32    192    
-272   -1104  
-512   48     
672    112    
-224   80     
144    96     
256    -32    
-32    144    
48     112    
-208   272    
160    64     
-32    80     
-64    -48    
256    0      
-208   -32    
96     48     
-16    -496   
64     -16    
-176   0      
208    -992   
-96    352    
32     -496   
0      -480   
96     -384   
-48    160    
176    160    
112    -384   
16     80     
112    192    
-128   -336   
32     -784   
80     -1632  
-1264  400    
1440   -608   
-256   -528   
-400   144    
64     -16    
224    16     
480    -864   
-496   320    
64     -64    
80     -928   
128    -48    
32     112    
-256   -240   
288    -160   
-176   144    
96     -592   
-48    176    
-288   64     
-240   -416   
496    -320   
-416   160    
144    -144   
-112   -528   
-352   -240   
752    -1264  
-64    240    
-64    -80    
-32    -80    
-64    -32    
304    -48    
112    128    
-112   192    
-208   -80    
-208   0      
208    64     
384    -80    
-336   -208   
-144   -240   
288    -160   
240    -416   
-16    -96    
0      -1648  
-240   96     
320    -64    
-272   96     
400    -112   
-384   144    
176    256    
-496   -1088  
-1472  -672   
768    -320   
-1552  -240   
-544   -336   
1040   80     
32     176    
-240   512    
-448   -592   
192    -144   
336    -16    
-112   -16    
-80    64     
-16    -288   
384    0      
-144   -240   
0      112    
-64    0      
256    624    
-16    368    
-160   96     
560    0      
-1952  -64    
832    -384   
192    704    
416    -1840  
-64    576    
-400   192    
32     -128   
-16    16     
80     -320   
-80    0      
-128   112    
-48    -32    
432    -16    
-1824  -48    
-32    -224   
208    192    
0      48     
112    -48    
-304   -1328  
144    64     
-304   -176   
128    -272   
-128   -256   
656    -112   
-464   496    
128    -112   
-192   -32    
-128   32     
-400   -16    
256    -704   
704    -432   
-832   208    
352    240    
480    -656   
-640   304    
-144   32     
80     80     
-128   -128   
-64    192    
-320   -48    
112    0      
48     -96    
-16    160    
400    416    
-832   288    
0      48     
304    -224   
-128   -928   
-848   -1552  
1472   -2912  
432    736    
-192   -224   
-1136  384    
496    -336   
-384   -1152  
400    16     
176    -112   
-464   192    
48     32     
368    -448   
-32    176    
-640   32     
-368   32     
288    -304   
144    304    
160    -176   
-48    0      
0      416    
-64    320    
144    48     
144    80     
-368   -224   
-192   48     
128    224    
-640   -176   
-112   688    
-176   1712   
-128   464    
128    16     
-208   -208   
-32    208    
-384   -160   
0      -384   
-464   272    
160    16     
112    -704   
-64    768    
192    768    
-160   -496   
432    -160   
-80    240    
-144   48     
-80    80     
352    -336   
-320   1376   
448    1072   
304    400    
-240   -160   
-16    -48    
-64    -16    
-320   -720   
-1008  -1008  
672    -1088  
80     -560   
-512   -656   
80     96     
208    1152   
-48    320    
80     -896   
-304   -160   
0      16     
-16    -48    
-48    48     
128    96     
-112   96     
-32    816    
112    400    
224    -272   
-320   224    
-96    -160   
-128   128    
32     -160   
-128   64     
-96    -368   
-160   -176   
-112   -320   
-80    112    
208    64     
-112   -32    
-224   240    
240    -336   
208    -48    
176    16     
-288   -48    
-32    -144   
-16    0      
576    -352   
64     -176   
144    48     
-176   144    
-96    48     
48     -112   
-112   0      
16     0      
48     64     
-112   256    
144    144    
-336   -48    
-16    96     
64     -304   
-832   32     
608    320    
-336   176    
336    -288   
-160   -336   
-144   -160   
144    -208   
-32    -480   
80     336    
16     64     
-256   -352   
80     -32    
-272   -176   
96     -160   
240    0      
-144   224    
-16    400    
32     720    
432    208    
-160   -224   
-352   -96    
96     128    
240    16     
-128   32     
-128   192    
0      -16    
-144   112    
-448   416    
592    128    
-624   1792   
1856   624    
-608   -176   
-112   -848   
336    -16    
-336   -576   
-416   -256   
720    240    
-448   -32    
-368   192    
256    80     
-64    160    
-32    240    
-96    288    
208    240    
48     112    
-304   -16    
288    -64    
-160   -112   
80     -80    
144    816    
-128   -880   
-1248  560    
1216   416    
-32    368    
-64    368    
-32    -64    
80     -64    
-32    0      
-224   -288   
480    0      
-144   288    
-176   -64    
-32    0      
144    160    
304    -80    
-240   112    
-144   96     
464    -48    
-64    -16    
-112   112    
-240   -208   
688    608    
96     -192   
-336   192    
144    464    
592    -288   
-192   688    
304    -80    
-32    32     
176    144    
-16    416    
-336   432    
112    80     
-16    -192   
-448   528    
-192   -224   
-16    192    
240    96     
16     64     
128    128    
-320   -48    
64     256    
-32    112    
112    240    
112    80     
-128   16     
224    -176   
48     192    
-848   -224   
-592   832    
1376   1392   
-1072  -112   
-528   -432   
944    448    
512    -624   
-864   400    
336    -64    
-240   352    
688    -80    
-320   176    
-320   -128   
64     192    
224    -96    
-208   128    
128    112    
-416   192    
192    -2848  
-336   128    
576    96     
-768   224    
48     -112   
864    80     
288    -128   
-832   112    
480    96     
-16    -320   
16     -32    
224    224    
-160   128    
-368   176    
368    -288   
-128   -512   
-48    -16    
320    -128   
112    64     
-432   -112   
224    112    
-608   64     
416    112    
-112   144    
192    128    
-192   48     
-32    160    
480    80     
16     320    
-320   224    
80     -288   
224    144    
-208   -16    
-32    64     
-144   -256   
176    176    
464    1008   
528    368    
-464   320    
240    256    
496    272    
-176   -64    
-336   48     
384    80     
-64    80     
-96    -112   
48     144    
144    -352   
-96    336    
16     320    
336    64     
48     -96    
-144   -48    
-80    96     
224    400    
-320   -192   
192    320    
-48    -256   
192    -16    
-640   832    
368    -496   
208    -336   
-192   -608   
-96    -2560  
-1312  944    
1744   224    
-608   176    
176    48     
160    -544   
-368   352    
176    -160   
-224   320    
448    224    
-560   32     
128    -144   
16     128    
256    -304   
-416   32     
176    96     
112    160    
32     400    
32     -400   
-112   -112   
-272   -544   
416    -576   
-544   448    
784    80     
-544   208    
-48    -208   
208    192    
448    352    
-416   192    
-96    -224   
112    16     
-32    -1568  
368    80     
-272   128    
48     64     
96     256    
-96    112    
-80    0      
16     -64    
80     16     
96     32     
-144   176    
288    -16    
-288   64     
416    -224   
-48    48     
-288   48     
336    80     
-32    80     
640    432    
-1568  2064   
2176   672    
-656   144    
-144   -624   
928    320    
-1024  224    
256    352    
208    48     
32     80     
0      -160   
-16    128    
304    0      
-64    144    
160    160    
32     256    
-192   224    
112    128    
48     32     
-48    48     
80     96     
-80    -416   
-592   -368   
1600   -960   
-128   352    
-432   -352   
-32    0      
400    16     
-64    0      
96     32     
48     -2368  
128    144    
208    -480   
-160   -448   
0      -160   
288    -720   
112    -128   
-112   -976   
0      -192   
112    -112   
64     -48    
240    160    
-80    -272   
128    -2160  
480    0      
-16    -96    
32     544    
304    352    
-272   -448   
-624   32     
448    -752   
96     -400   
-208   0      
416    -208   
16     -1952  
-384   -176   
16     416    
448    -80    
-240   -368   
16     192    
-160   -16    
128    32     
64     -192   
-176   -192   
-400   -208   
224    -48    
16     -1184  
-256   -384   
-48    -160   
-208   336    
416    704    
-320   -1072  
992    -1856  
1072   992    
624    368    
-960   -624   
288    128    
496    48     
304    128    
-512   -912   
-144   -32    
224    -464   
464    608    
64     160    
-272   -128   
-48    80     
544    -1264  
-32    -416   
-192   272    
-16    48     
288    -336   
0      -320   
0      352    
-64    -224   
-240   -288   
-48    -960   
-368   -640   
-288   -608   
32     -16    
-48    32     
80     -288   
256    -1776  
-112   64     
224    -176   
-16    -32    
-112   64     
480    -32    
-560   -480   
240    -880   
112    1136   
128    544    
-304   176    
-176   -176   
96     176    
176    -208   
48     0      
-304   -432   
-272   48     
544    -704   
192    -32    
-272   -320   
48     192    
352    48     
-1072  752    
144    576    
352    1520   
-480   -400   
-96    -1120  
-352   -1008  
-752   -1952  
448    288    
432    320    
192    0      
-192   -496   
-224   -32    
416    -336   
64     -144   
-240   -352   
-304   288    
64     160    
80     -208   
-240   -48    
-128   -368   
-96    -128   
-96    -336   
64     304    
272    336    
-176   816    
48     -576   
272    144    
-144   224    
-240   -96    
32     -912   
-384   144    
-32    -96    
-144   -704   
-400   -176   
256    112    
-224   -432   
-720   -464   
-64    576    
240    176    
144    272    
16     -416   
-16    -224   
-336   272    
240    160    
112    256    
-240   240    
-176   80     
-32    32     
80     96     
176    1248   
-112   576    
-224   -544   
-64    128    
-544   -96    
64     512    
-224   656    
-160   -464   
-64    -128   
-176   256    
0      -176   
-96    -320   
32     -400   
48     624    
-80    80     
96     -240   
-32    144    
-256   -432   
208    320    
-176   -96    
32     224    
16     -48    
112    16     
-208   240    
-336   64     
304    64     
-320   -16    
-64    0      
400    480    
-736   0      
1312   -1568  
-592   1008   
544    400    
-368   288    
-816   -224   
1024   192    
-400   416    
48     400    
-352   -48    
192    48     
0      80     
-128   64     
-96    -224   
-272   -64    
-224   -192   
32     0      
-96    32     
176    240    
64     48     
-80    -160   
-432   -624   
992    160    
-944   96     
400    -208   
320    272    
-752   48     
32     16     
320    240    
128    -336   
-288   192    
-64    48     
112    64     
256    -112   
-80    80     
48     48     
-320   64     
224    -48    
192    -176   
384    240    
16     288    
-320   16     
-112   -304   
464    432    
704    -128   
-32    -352   
-496   400    
-384   432    
-64    -48    
1008   -640   
-496   96     
64     80     
-128   240    
320    64     
-144   -144   
-256   64     
144    608    
208    320    
144    144    
96     272    
192    176    
-672   -176   
208    96     
352    -64    
-96    80     
-544   -64    
656    352    
176    -256   
304    -272   
400    224    
-1168  -1648  
0      1840   
1696   -416   
-1392  320    
464    16     
-144   -480   
-176   -160   
320    32     
256    64     
-496   -240   
-368   448    
752    -176   
-144   80     
32     -96    
-432   -112   
368    0      
304    96     
-128   32     
256    112    
208    720    
-1200  608    
752    320    
96     -112   
-208   80     
864    240    
-1328  -256   
448    176    
672    -112   
-816   32     
288    -144   
-80    304    
128    -16    
-288   80     
368    80     
-496   80     
880    176    
-496   160    
-96    192    
128    288    
192    -80    
-128   -32    
32     48     
272    176    
-112   176    
96     240    
256    96     
-544   -176   
240    -272   
400    -224   
-128   256    
224    272    
-608   0      
192    -368   
-720   80     
608    80     
-448   -80    
-224   -112   
288    64     
64     352    
304    240    
-320   336    
48     272    
32     -48    
64     80     
32     64     
-144   432    
-304   16     
528    288    
-304   208    
176    80     
416    208    
-144   112    
-32    64     
-32    -16    
-32    192    
80     -48    
-144   -128   
128    -224   
-64    288    
-224   -464   
128    -272   
976    2016   
-1520  832    
864    -128   
592    -528   
-544   96     
48     192    
144    64     
256    256    
-336   -48    
96     -384   
0      288    
-160   16     
352    -48    
-176   64     
-64    -240   
48     304    
-32    -16    
16     -48    
128    16     
-224   80     
48     192    
-144   704    
1088   -304   
-800   320    
-320   16     
320    64     
-64    80     
272    -272   
-272   -16    
-16    -3168  
112    160    
320    128    
0      32     
-320   176    
-48    -32    
192    -160   
144    16     
0      -128   
80     48     
-176   112    
-16    112    
464    208    
-128   64     
-432   16     
288    -784   
0      -64    
160    -48    
-48    368    
-64    128    
128    -592   
736    624    
-608   1568   
-704   256    
720    -240   
-368   -336   
-48    336    
352    0      
-560   64     
352    64     
-80    -336   
-192   48     
128    -208   
128    208    
0      32     
144    48     
-192   0      
160    32     
-112   -176   
-256   -160   
80     -192   
32     80     
-64    -896   
-1120  928    
2016   560    
-1504  208    
48     48     
544    -960   
-784   528    
480    288    
-128   -32    
304    128    
160    80     
-384   64     
128    256    
32     -64    
368    160    
-64    176    
-96    -16    
32     320    
352    64     
112    192    
-128   -496   
0      208    
80     208    
-1040  656    
400    256    
400    304    
-240   464    
768    -128   
-304   -16    
-176   144    
-112   -144   
320    -464   
160    -48    
16     128    
192    -704   
16     -384   
384    368    
-80    -960   
-80    160    
-192   144    
-96    224    
256    16     
96     304    
112    112    
-64    48     
464    -240   
192    -208   
-592   544    
272    -48    
160    160    
-1008  160    
192    368    
-1104  -96    
192    -800   
496    -432   
64     176    
-144   2352   
-304   448    
272    32     
368    224    
0      128    
-288   -608   
-416   -240   
144    -336   
736    -176   
-192   -80    
-400   240    
-256   208    
576    288    
192    1072   
-208   304    
-240   -320   
48     -112   
128    96     
448    -704   
-464   0      
400    704    
-224   144    
128    -1776  
-128   -416   
-176   -352   
240    32     
160    -752   
-224   -976   
128    320    
-48    944    
-544   -160   
144    -160   
368    -96    
-112   352    
48     176    
-128   -496   
304    112    
96     400    
96     896    
-480   -624   
240    576    
304    320    
-32    112    
16     48     
208    288    
-176   -16    
-272   -416   
448    112    
-336   64     
64     -144   
640    528    
-736   480    
32     -1344  
304    -768   
32     160    
-16    80     
32     32     
-16    -400   
-16    -624   
-176   -144   
112    16     
144    352    
128    -992   
16     -288   
-192   -240   
192    192    
16     -624   
48     -16    
-48    -272   
96     1136   
272    1296   
-240   -144   
176    -432   
288    -64    
-560   -816   
240    -704   
-656   368    
-240   -224   
-1104  -704   
160    16     
-208   144    
240    -368   
272    -288   
-272   -1216  
-96    -320   
-32    -608   
368    48     
-128   192    
-176   -160   
32     -144   
144    -80    
128    80     
-112   16     
-144   240    
-256   -480   
352    -880   
-208   352    
576    384    
-224   -816   
240    416    
-64    -592   
-96    400    
176    16     
-32    -16    
128    -144   
-128   64     
-96    -288   
160    288    
-224   48     
-528   0      
-864   224    
96     192    
80     -16    
64     -144   
48     208    
112    -432   
-128   160    
32     -304   
112    160    
48     -32    
16     208    
-64    32     
32     -112   
640    208    
-96    928    
-1232  416    
976    176    
-224   64     
-528   -32    
256    144    
368    -576   
-304   -336   
-32    -400   
288    0      
-224   208    
288    -48    
-192   -16    
240    -128   
-288   -32    
320    160    
-624   -16    
272    272    
-288   -112   
-208   -288   
64     -576   
1232   368    
-672   -16    
560    -1216  
-112   -320   
144    128    
96     -208   
144    208    
512    -96    
-304   144    
-48    -32    
-16    64     
16     -240   
-208   0      
336    -352   
-416   128    
176    0      
-432   -16    
464    -1408  
-224   -144   
-288   16     
224    -192   
-1456  144    
784    48     
1376   0      
-624   224    
-384   16     
-16    -64    
48     -112   
496    112    
368    96     
-512   -80    
0      320    
560    176    
-400   -32    
-80    368    
-96    464    
368    256    
544    -160   
-64    320    
-448   80     
-704   288    
864    -240   
-32    128    
-192   464    
-384   -80    
96     96     
-80    96     
-512   -32    
-928   544    
2944   -1776  
-1728  1680   
384    160    
-1072  -16    
368    272    
-640   -224   
368    176    
-256   272    
64     -16    
-1088  -304   
352    240    
-416   -288   
112    16     
-192   16     
48     48     
-784   -16    
832    144    
-432   -64    
-976   176    
800    144    
-784   160    
368    112    
-496   -240   
-176   272    
656    -224   
-704   160    
-16    -208   
288    128    
208    -112   
-304   64     
48     -96    
-144   160    
256    128    
-256   432    
-272   32     
-80    -48    
256    -208   
-368   -208   
272    80     
-96    96     
176    144    
-80    48     
128    144    
-192   192    
-160   64     
112    32     
-64    -64    
-192   -624   
-832   -752   
224    -320   
-160   -320   
352    -224   
-368   -32    
304    64     
208    32     
-304   -128   
48     -48    
0      16     
16     320    
352    208    
-160   176    
-80    16     
-112   -224   
-80    -112   
160    32     
-16    -64    
-176   416    
304    608    
-384   512    
16     224    
-32    128    
32     -240   
-80    -160   
-16    -32    
-96    -176   
80     160    
0      272    
-272   528    
-32    128    
96     112    
-672   -1696  
992    -416   
-256   192    
-1376  352    
1360   224    
160    144    
-784   848    
0      416    
480    304    
32     -192   
-304   208    
48     208    
0      -176   
64     -512   
64     -48    
80     736    
-96    832    
-48    400    
-64    496    
-144   -16    
560    624    
-880   16     
992    96     
-640   -64    
-48    -240   
96     384    
240    -592   
48     80     
-320   240    
288    144    
-224   -64    
64     48     
-288   96     
48     224    
64     -272   
208    -32    
32     192    
32     -48    
80     528    
-32    -80    
0      -80    
96     560    
-48    16     
-112   -80    
208    -128   
-288   288    
32     112    
48     -224   
-48    -32    
-144   112    
-1440  -896   
720    1040   
944    -160   
-1552  880    
720    -16    
576    -496   
-992   -1408  
-128   -624   
256    -688   
-176   544    
192    176    
-160   32     
-304   32     
160    64     
320    96     
-96    -128   
-240   -192   
320    240    
16     256    
-80    -96    
-256   -608   
1264   448    
-1968  -48    
208    192    
1024   400    
-1168  -208   
112    352    
752    496    
-96    -128   
-320   -48    
64     80     
-64    0      
160    -320   
-224   -336   
-32    -368   
-128   64     
32     16     
528    -368   
-864   -1408  
0      -448   
272    -64    
32     464    
-160   64     
736    640    
-720   672    
368    -608   
672    544    
-960   720    
0      -16    
224    -128   
32     720    
-192   -16    
112    192    
192    -48    
-224   0      
464    48     
-496   -880   
-304   -64    
240    432    
-448   496    
736    272    
-64    208    
-128   480    
-80    352    
-32    32     
352    96     
-336   -128   
240    496    
-32    448    
0      128    
912    2144   
-768   -592   
-128   -432   
1472   -640   
16     464    
-960   -224   
304    -1088  
848    -400   
112    208    
-320   -144   
-128   480    
432    272    
288    608    
-352   -240   
0      -96    
-320   -32    
112    -1328  
32     -16    
-256   752    
176    624    
32     -352   
64     -64    
-416   -384   
864    -16    
-480   -224   
-272   800    
592    176    
-144   1584   
112    -1024  
-192   -176   
176    -464   
-64    -528   
48     224    
320    608    
176    304    
-192   -240   
80     -80    
608    688    
32     688    
256    848    
176    1200   
-48    816    
320    -432   
-512   -784   
304    624    
-128   1024   
208    -624   
464    400    
-256   -848   
48     -512   
-272   -336   
-16    -128   
816    -16    
80     1616   
-1296  -1056  
-576   288    
576    608    
-304   -832   
112    272    
-16    656    
224    1024   
64     32     
208    480    
-32    256    
-336   224    
112    -2512  
112    -96    
-256   -192   
32     -176   
160    -496   
-592   -336   
96     -256   
160    -32    
192    -144   
-224   48     
48     192    
64     -720   
96     -512   
32     -320   
-160   128    
-16    -1296  
1344   2288   
480    592    
-912   -208   
400    384    
48     656    
-48    1040   
224    512    
-464   192    
-16    -624   
192    64     
80     -528   
32     176    
192    176    
-352   192    
368    -240   
-208   288    
160    304    
16     48     
32     48     
-112   112    
368    1728   
128    -400   
-368   -112   
784    -512   
-272   -16    
-16    -112   
128    160    
160    -272   
-160   -128   
-288   -480   
720    112    
-192   176    
-80    16     
-160   -64    
336    144    
160    112    
-112   -160   
-272   -144   
192    -192   
192    32     
80     -128   
128    160    
-240   -288   
320    16     
-144   -224   
256    176    
0      160    
0      192    
-176   -64    
1696   1440   
-528   -1792  
-2608  576    
2336   -1184  
400    0      
-1168  224    
256    -288   
192    128    
32     -192   
64     -16    
128    32     
-144   -1200  
80     112    
224    -80    
-96    80     
-208   32     
336    -288   
-176   -64    
16     -1552  
48     -160   
96     -2192  
-32    -368   
1168   464    
-1376  0      
176    -1056  
336    -80    
-80    -528   
-320   -96    
768    -272   
-80    192    
96     -80    
-480   32     
-144   16     
416    -224   
64     -128   
192    -192   
-80    -16    
-64    32     
-224   -320   
-144   -960   
832    -128   
-256   -160   
-368   -624   
-192   224    
480    16     
-512   -32    
864    -144   
-128   496    
-688   240    
176    -176   
-240   -48    
0      64     
-400   -368   
48     -192   
160    -1056  
224    -304   
-352   -288   
-240   -256   
144    320    
240    16     
-208   -288   
-128   -160   
64     -176   
-96    32     
-32    112    
96     -128   
-16    -96    
400    -736   
64     -80    
-288   -384   
-1248  -2928  
2288   -1136  
256    688    
-1632  -128   
240    144    
64     -304   
-304   -32    
576    608    
-96    -368   
-1632  48     
-16    -96    
-192   -16    
224    -304   
16     128    
80     -480   
-112   0      
48     -320   
-16    160    
-352   0      
-32    -432   
-256   -608   
256    -256   
-176   -160   
592    -144   
320    -64    
-512   -48    
-80    192    
240    64     
16     -80    
-112   -992   
-368   -112   
272    -1376  
160    480    
-352   48     
208    -208   
192    -400   
-128   -352   
-576   -80    
96     144    
144    128    
-48    48     
-368   160    
160    -144   
-96    352    
320    32     
80     336    
-16    -112   
48     -192   
-192   -272   
208    -112   
-352   240    
-64    464    
304    848    
368    -48    
-336   -576   
-128   -1568  
-288   -432   
416    64     
-48    400    
96     96     
192    368    
-240   160    
-32    800    
768    272    
-624   176    
-64    400    
-32    -256   
384    80     
-96    -48    
-144   528    
80     96     
-176   -144   
32     -224   
48     64     
-432   224    
0      336    
-96    352    
-1360  -48    
176    -656   
-304   -352   
-48    32     
480    1296   
-832   -608   
144    -144   
848    416    
-640   320    
160    -432   
-128   0      
224    -304   
-384   -272   
-160   0      
-160   64     
-80    480    
128    128    
48     -112   
-96    -160   
80     112    
112    64     
-144   704    
-32    -128   
32     -192   
-144   -240   
496    -464   
-432   256    
96     -496   
80     144    
-176   240    
64     496    
-64    1360   
-272   -240   
224    -560   
-864   -176   
16     368    
-80    320    
224    -32    
-160   160    
-176   -80    
-112   -208   
432    -32    
-128   -48    
-112   32     
-272   0      
112    48     
-80    128    
-128   -64    
-16    -384   
48     -240   
-64    32     
-816   -48    
0      160    
-240   -224   
1376   1264   
-1344  720    
-1360  -416   
2448   144    
-960   320    
-480   -128   
480    -32    
-416   720    
-16    368    
336    -944   
16     432    
-128   256    
-48    -176   
-64    32     
-240   112    
32     128    
144    304    
-48    -128   
-96    288    
64     -144   
0      240    
176    896    
1776   32     
-1232  496    
560    -1056  
-608   -752   
384    -704   
-768   -896   
432    -624   
-192   -176   
-80    416    
320    544    
-240   640    
224    816    
192    320    
-752   384    
432    320    
144    1280   
-128   1056   
96     848    
32     32     
80     192    
-192   480    
-80    -288   
496    -1328  
-16    -176   
-496   368    
448    1072   
176    288    
-592   496    
608    256    
240    -48    
-336   -160   
-240   -16    
-32    480    
480    -784   
-16    -256   
-192   -128   
192    1056   
368    208    
-64    112    
-96    80     
192    176    
400    704    
304    208    
-384   -544   
-400   32     
-64    0      
224    320    
496    192    
-32    -112   
496    -1024  
384    240    
272    176    
-624   -176   
96     -336   
-32    208    
384    224    
-256   64     
48     784    
-256   -80    
192    -240   
288    352    
-240   608    
-272   16     
48     -256   
128    -80    
-160   -64    
48     -80    
-160   16     
352    480    
112    256    
-448   -160   
-240   -736   
1360   -1344  
-1024  -400   
1008   -240   
-608   352    
272    -416   
0      112    
-96    144    
112    368    
-128   96     
368    64     
48     -16    
-352   -80    
-128   -64    
256    176    
96     320    
80     416    
96     736    
0      592    
288    -128   
64     -48    
0      224    
-368   224    
576    736    
-272   368    
-16    240    
80     -64    
0      -96    
-176   -128   
464    -176   
688    208    
-80    -368   
-640   -16    
368    48     
80     704    
-256   480    
-128   208    
96     -304   
-400   -64    
224    -48    
384    -272   
-192   80     
-144   -16    
272    144    
-80    400    
-144   112    
192    -224   
32     -64    
-320   0      
352    -224   
-16    -80    
-128   368    
64     96     
-272   192    
256    240    
208    -144   
-240   32     
-240   -32    
1376   2800   
1168   176    
-1584  608    
192    -144   
-32    432    
464    -48    
-224   -64    
-208   -128   
208    -448   
-80    272    
480    -48    
-192   160    
80     -1760  
-176   544    
176    32     
208    384    
224    -112   
-304   -48    
32     208    
160    96     
-384   -304   
912    -448   
-592   240    
-400   32     
752    160    
-272   -128   
272    -144   
-224   -880   
288    80     
0      240    
192    64     
-16    144    
-160   0      
-160   48     
528    -192   
-96    96     
64     -16    
240    240    
-48    -32    
-256   80     
496    -64    
0      160    
16     -160   
-16    -32    
-352   -352   
320    112    
-336   240    
432    128    
-144   32     
-32    -944   
-1008  -1104  
-480   -224   
336    64     
544    144    
-336   -16    
-144   -144   
80     -48    
-384   -96    
160    -112   
80     -592   
112    144    
-32    48     
80     240    
-160   -176   
-32    256    
240    -64    
-160   112    
-240   -96    
272    80     
-16    64     
448    672    
-1296  -64    
496    -96    
-80    -224   
-864   -816   
1264   112    
-768   -3232  
112    -128   
-64    144    
128    16     
-336   48     
64     208    
240    -16    
-64    192    
96     0      
-320   128    
288    -96    
80     -256   
-80    128    
144    -352   
-80    128    
-352   -736   
160    464    
-32    -96    
-1040  128    
496    -112   
432    -176   
576    304    
-16    -368   
-208   64     
112    112    
-240   -48    
176    -1136  
256    512    
-480   32     
-112   64     
0      -848   
-224   -32    
336    -144   
-304   256    
-384   -64    
464    144    
96     32     
-192   -112   
160    448    
-288   -224   
496    48     
176    0      
-528   -192   
2336   3952   
-1344  1584   
912    -544   
1456   -288   
-1088  -96    
-32    0      
448    144    
704    320    
80     96     
-736   -400   
640    144    
-32    -96    
240    128    
224    48     
-400   96     
96     -16    
480    48     
-240   0      
-144   192    
512    1520   
416    304    
-448   -160   
128    -1200  
-128   -2144  
-544   -208   
912    -976   
192    -144   
-448   -320   
32     -16    
368    0      
64     -640   
-576   -240   
240    -144   
640    -592   
-800   -224   
96     -1120  
128    -528   
-32    -576   
176    -224   
0      -32    
-208   -288   
192    -352   
320    -1216  
-304   -560   
192    -224   
48     -528   
80     -464   
-96    -112   
-448   -512   
304    -160   
496    -528   
-144   0      
-144   -272   
-672   336    
448    -336   
336    -48    
-608   144    
-32    320    
112    -112   
128    -1200  
-80    -128   
112    848    
64     512    
-160   208    
128    640    
-16    -352   
-16    -64    
-304   288    
-192   -368   
80     -144   
96     -352   
-160   96     
32     0      
-112   -48    
128    -496   
0      80     
-64    -160   
-80    624    
48     816    
-192   288    
192    -144   
-16    -256   
240    -1008  
-64    -48    
32     -160   
208    48     
-112   -64    
48     160    
80     -64    
-64    -80    
64     272    
-192   144    
-32    -128   
272    0      
208    -64    
-256   -48    
-48    -144   
160    -64    
160    160    
-32    16     
-96    -208   
432    64     
-1344  288    
720    -160   
80     432    
160    -240   
-368   -480   
-160   112    
544    -736   
224    -176   
64     -240   
-304   96     
-160   80     
336    32     
192    48     
-144   -320   
-192   112    
224    -128   
-272   80     
96     -208   
16     80     
176    -768   
-208   -16    
160    -1808  
96     32     
-384   544    
544    176    
-256   96     
336    -272   
224    -496   
-544   -176   
-304   -800   
-1872  80     
2240   256    
-1136  592    
112    496    
576    368    
-480   -704   
176    -3040  
192    -176   
32     928    
0      256    
-336   -64    
32     208    
144    176    
-64    -160   
-112   224    
64     -304   
320    416    
-16    -160   
32     160    
-160   -448   
1088   240    
-1872  -128   
400    192    
624    1648   
-912   1632   
-592   1056   
960    1200   
-80    368    
-528   512    
496    464    
-176   128    
-48    64     
496    -112   
32     -192   
-768   -80    
160    0      
-432   96     
240    -64    
32     32     
-688   176    
96     80     
336    384    
-80    144    
-1008  -736   
576    -704   
-896   -208   
128    -16    
416    544    
160    112    
-880   112    
-160   -224   
48     208    
384    -224   
-240   -96    
-240   -800   
848    -1168  
-656   -576   
608    160    
-240   32     
-112   -16    
288    16     
272    176    
-624   80     
-64    -32    
64     -144   
416    -96    
144    176    
64     848    
-704   640    
48     -2640  
-1216  -1296  
976    352    
-96    400    
352    -432   
144    -592   
-752   -448   
592    320    
144    -688   
-144   -256   
-240   -416   
176    208    
48     112    
400    96     
-112   -32    
-672   128    
496    16     
-48    64     
128    -896   
-1184  -1600  
400    -576   
64     -208   
80     400    
224    -96    
-64    -32    
-144   544    
-224   400    
-160   192    
400    -656   
-336   48     
272    48     
-368   -208   
288    -432   
112    64     
-384   16     
-208   448    
-48    96     
-16    80     
160    -80    
-160   80     
-176   -80    
-96    -48    
368    -16    
-32    160    
304    64     
-32    112    
-192   80     
48     -48    
-144   -96    
0      -80    
288    144    
-880   -48    
496    384    
512    144    
-480   -48    
112    288    
224    208    
-112   0      
-16    -496   
-528   16     
288    80     
240    -48    
-96    96     
-112   224    
-240   96     
64     16     
112    384    
352    176    
-400   -416   
-208   208    
304    144    
0      -48    
-160   -64    
-128   48     
128    256    
-32    -128   
80     -32    
64     32     
-160   112    
-128   48     
-544   -1136  
1440   -304   
-1152  688    
-416   -112   
848    -480   
-992   368    
288    -336   
144    320    
112    -480   
-528   176    
272    -160   
272    128    
-80    96     
-240   144    
192    208    
-48    352    
-336   -208   
112    -112   
-48    144    
-16    0      
96     16     
-464   -672   
800    -288   
32     320    
-1200  192    
816    96     
176    -48    
-544   64     
-48    -160   
80     48     
176    16     
-240   48     
304    0      
-128   64     
-32    80     
352    32     
-464   -176   
336    -96    
-160   16     
64     192    
-128   16     
96     144    
96     -112   
-144   80     
192    16     
-624   -16    
560    256    
-48    -48    
-272   32     
192    32     
976    -752   
-1744  16     
-256   -448   
496    64     
352    -144   
-160   -32    
-432   80     
336    336    
-160   32     
160    -192   
64     128    
0      112    
-112   80     
128    64     
48     160    
-224   112    
304    144    
-208   96     
80     -176   
-64    -16    
-96    0      
-128   -560   
960    496    
-784   176    
448    -96    
16     208    
-560   112    
368    64     
-16    -416   
-320   16     
352    176    
-272   64     
160    160    
112    0      
32     128    
-288   128    
400    48     
-144   272    
64     -80    
-80    -464   
-192   256    
144    208    
-112   -112   
-272   48     
592    160    
-528   96     
96     32     
80     272    
576    -160   
-304   256    
-32    32     
304    128    
-128   -208   
-224   160    
176    208    
-32    -1504  
128    32     
-80    80     
432    240    
-240   0      
-160   80     
496    80     
-256   96     
-112   48     
128    0      
96     -64    
144    112    
-144   48     
48     -48    
80     96     
240    -1472  
-1600  608    
976    1056   
-1152  240    
-512   -32    
1856   112    
-400   -272   
-864   432    
96     -112   
272    -80    
320    -128   
-64    96     
-448   16     
272    -48    
176    -176   
-128   -480   
-320   144    
0      -1088  
432    160    
-256   -912   
-384   -960   
272    -400   
-144   -16    
240    368    
688    -80    
-592   -320   
-96    96     
-32    -240   
160    -688   
-544   -1056  
192    0      
128    720    
-80    -784   
-96    -352   
64     240    
160    448    
-240   128    
736    -288   
-800   -1072  
-64    -224   
208    400    
176    208    
-176   -80    
-208   16     
528    720    
-480   368    
192    -800   
192    -1216  
-448   416    
336    -1856  
-192   -80    
240    -144   
-224   832    
1008   -640   
-656   704    
480    1024   
240    432    
-256   -160   
336    128    
-192   0      
80     -208   
-48    -80    
-32    0      
176    144    
128    -512   
128    672    
32     608    
-192   304    
192    -64    
304    -160   
-480   208    
336    -128   
-272   144    
352    -240   
208    128    
-336   -608   
-176   192    
192    -288   
272    -144   
192    -80    
0      48     
16     128    
-496   448    
1072   -480   
-768   256    
288    -320   
-96    -352   
96     256    
32     -464   
192    -128   
48     -208   
176    320    
176    128    
-96    32     
-80    -288   
-176   448    
416    -128   
-144   -320   
64     -240   
-48    112    
64     -656   
-16    -528   
800    -480   
-240   368    
-80    0      
48     224    
0      176    
-32    -256   
-96    304    
64     -112   
-256   -272   
-32    -240   
592    -80    
-80    176    
-560   -176   
176    -592   
208    128    
-48    -528   
-176   416    
-48    -480   
-128   -256   
192    192    
0      -304   
16     -1440  
64     -320   
240    -432   
32     320    
0      -928   
-144   -128   
336    144    
48     528    
1408   944    
-1744  592    
-688   -240   
1280   -1568  
32     -80    
-624   -768   
48     -80    
192    1888   
800    -272   
-64    -1184  
-592   -1216  
128    -512   
144    -144   
-16    288    
240    -96    
-352   -48    
176    -432   
192    -464   
-96    -976   
-192   -608   
16     -704   
0      528    
2304   -96    
-1696  592    
576    416    
544    -608   
48     -1280  
-448   -1488  
240    -48    
240    80     
-864   64     
320    -384   
192    -32    
192    -96    
-352   -128   
432    -224   
144    16     
0      688    
-272   336    
64     -48    
176    -80    
176    -192   
128    -192   
512    128    
368    368    
-688   -112   
-160   -32    
240    320    
80     -240   
256    976    
-784   128    
16     -112   
384    -832   
-144   -112   
-208   96     
-368   112    
896    448    
-384   64     
-528   -208   
112    128    
-320   16     
80     -16    
-272   -64    
-624   -512   
176    -64    
192    -64    
-96    -96    
96     -112   
-288   80     
-304   80     
2176   -832   
-2576  -368   
1056   224    
704    -80    
-160   160    
-512   -128   
-32    -336   
400    80     
272    -256   
-656   192    
160    -192   
-96    256    
-48    -368   
624    112    
32     -1392  
-256   208    
-112   144    
208    32     
-224   320    
192    -672   
-320   160    
496    -80    
-448   16     
448    48     
192    -176   
304    -704   
-240   -176   
-96    -576   
240    176    
-336   -192   
400    -64    
-128   192    
32     -16    
48     224    
176    16     
-80    -32    
64     192    
368    688    
96     400    
-496   144    
384    -224   
112    96     
-304   -208   
48     208    
-416   48     
272    80     
176    0      
192    432    
-256   144    
-64    384    
592    160    
-80    368    
-192   -272   
-592   -80    
1136   64     
-544   -192   
-496   -368   
304    -624   
-592   -112   
272    -192   
-192   -80    
-144   16     
-1072  80     
-16    288    
224    -224   
-208   -112   
160    -592   
-320   80     
-272   -112   
64     -48    
160    -160   
-64    -80    
-64    -160   
-160   48     
272    0      
-464   80     
128    112    
-176   64     
80     272    
-592   96     
-784   -960   
2176   1024   
-80    672    
-1024  64     
512    320    
-544   -224   
576    -240   
48     416    
-96    -208   
-432   -128   
240    176    
192    112    
-16    112    
-112   32     
80     416    
192    -16    
-1040  224    
224    144    
-160   -64    
-96    336    
-16    -208   
-288   368    
1056   -528   
-656   128    
-304   96     
688    208    
-160   64     
-112   112    
-304   -96    
-112   -16    
448    48     
-432   96     
-320   128    
-32    -160   
288    208    
-288   -64    
224    80     
-224   -96    
-160   128    
480    -48    
-656   112    
256    -16    
-160   80     
32     0      
224    192    
-384   32     
-608   -16    
368    -16    
64     -160   
-128   240    
832    1488   
-1040  304    
-1440  16     
1744   -176   
-656   -208   
-256   16     
688    176    
-336   128    
-176   96     
224    16     
80     96     
-336   -16    
-64    144    
192    176    
-240   64     
-112   336    
176    -112   
-272   128    
48     144    
0      368    
-64    48     
352    976    
-528   -880   
-928   176    
1088   16     
48     -64    
-240   128    
-64    336    
272    -304   
160    208    
-208   16     
80     -32    
-208   144    
32     0      
240    -80    
16     192    
-96    -32    
-176   -352   
-496   384    
224    -128   
16     32     
-256   128    
-16    576    
832    -720   
-624   272    
16     336    
624    -80    
-128   128    
-80    208    
-112   32     
64     176    
-32    32     
96     208    
-48    32     
-160   -128   
48     -224   
-160   64     
768    -96    
-448   -240   
704    432    
-368   128    
-224   48     
64     144    
48     -80    
32     64     
-112   -48    
432    -176   
32     128    
32     -112   
352    304    
-496   64     
960    448    
640    -336   
-1904  -576   
-208   368    
1712   208    
-784   -864   
80     -1648  
368    272    
208    544    
-560   240    
144    96     
80     16     
-80    416    
16     0      
224    560    
-480   672    
160    -240   
784    -48    
-320   736    
-32    496    
16     -256   
128    -336   
208    -496   
-256   -1104  
0      -224   
64     1072   
48     1280   
80     480    
-64    112    
144    -32    
144    -208   
-112   288    
80     688    
64     224    
16     288    
112    656    
304    1168   
-144   976    
-144   -112   
256    -16    
-48    80     
-96    224    
-64    368    
-112   -480   
560    -896   
-272   -16    
16     -48    
-512   -736   
240    400    
-240   -368   
-112   -576   
544    -416   
-704   160    
256    192    
-80    -368   
-144   -432   
-48    -1264  
-48    -96    
48     832    
128    400    
192    -64    
-144   624    
-48    16     
-128   64     
64     112    
-64    416    
-80    400    
-144   -368   
-144   -64    
32     160    
208    112    
64     128    
-128   -64    
64     -96    
224    160    
-32    224    
368    -144   
-336   720    
-16    208    
528    16     
-320   -32    
448    -736   
-16    288    
496    16     
-224   -96    
-208   320    
384    -176   
-112   288    
272    -256   
48     -192   
-240   144
[truncated: 374,011 more chars]
