# Supplementary material for: A Fault Diagnosis Method for One‐Dimensional Vibration Signal Based on Multiresolution tlsDMD and Approximate Entropy
Source: Hindawi journal article supplement (doi:10.1155/2019/3262818), 2019-01-01
Supplement: f1 [file 3262818.f1.zip › 3262818.f1/gear signals/pitch errors signal/Data15.txt]

-480   112    
48     -128   
-224   -352   
496    -512   
-400   -160   
-32    384    
416    -144   
-1344  0      
992    -880   
-288   64     
-192   16     
304    -32    
144    240    
-16    -64    
-160   96     
-112   176    
32     112    
128    -16    
-80    -16    
144    -96    
-400   208    
112    -32    
176    -144   
-256   240    
96     384    
-112   176    
208    208    
-368   208    
-544   48     
-352   -96    
960    -464   
-64    240    
-336   48     
192    112    
240    160    
-496   144    
-624   -176   
976    -80    
-176   464    
-752   -240   
752    -400   
-112   112    
224    480    
-288   96     
64     96     
112    -16    
96     112    
-64    16     
-16    112    
-240   -80    
624    368    
240    0      
-208   -96    
-208   -272   
464    -944   
-1136  -3040  
-224   -496   
368    -144   
224    -288   
480    -64    
64     -880   
-272   80     
-176   64     
-16    512    
624    0      
-368   16     
-256   -240   
192    336    
192    208    
16     -288   
-240   32     
-192   144    
-64    144    
48     -384   
-32    160    
0      432    
0      192    
-336   -368   
176    -432   
-480   -752   
96     32     
-80    -336   
272    -752   
272    576    
-176   464    
-176   496    
192    128    
144    -416   
288    880    
-464   112    
0      -144   
240    288    
128    -128   
-256   -752   
-48    -144   
368    336    
-112   -64    
48     -224   
-32    -144   
336    416    
-320   544    
144    -1056  
176    -656   
-368   -400   
32     304    
160    64     
528    960    
-1072  992    
288    1248   
544    1088   
-256   128    
208    544    
208    784    
-528   -992   
368    -768   
464    512    
-288   272    
-224   -80    
-112   -192   
96     64     
192    240    
-272   352    
128    464    
416    64     
-144   -96    
-64    -336   
-224   208    
-64    48     
192    32     
-32    144    
-32    -64    
144    16     
-272   -320   
-16    32     
368    112    
-224   -16    
144    576    
-176   48     
336    -128   
224    288    
-288   -32    
-128   64     
224    -64    
256    64     
112    -112   
304    -192   
-176   336    
80     96     
128    48     
-144   48     
48     -352   
48     96     
-176   -48    
144    64     
128    192    
16     16     
-96    -592   
-240   -2128  
256    304    
-448   160    
480    -160   
-112   -336   
-176   64     
0      -688   
80     -224   
16     176    
144    192    
-176   -160   
112    -144   
-240   176    
32     -304   
432    144    
80     320    
-176   768    
-64    -2288  
640    -192   
-80    -32    
-464   128    
-96    64     
208    208    
96     32     
48     224    
16     80     
-320   0      
-224   544    
464    -48    
-160   1328   
1328   192    
-304   -448   
-384   -640   
608    32     
-560   -480   
-176   -176   
816    240    
-384   -16    
-128   240    
208    48     
-80    144    
-48    48     
48     384    
256    80     
64     112    
-336   -272   
288    -32    
-160   -352   
96     -48    
144    800    
48     -832   
-1328  480    
1152   544    
208    400    
-176   352    
48     -32    
160    -128   
32     192    
-240   -416   
384    32     
0      -16    
-176   -16    
-16    -32    
48     96     
368    -16    
-160   240    
-208   64     
448    -80    
16     48     
-176   -16    
-48    32     
496    592    
528    -176   
-480   -48    
32     32     
432    -768   
-336   -64    
496    -816   
272    128    
0      -176   
128    464    
-256   400    
48     -496   
304    -176   
-528   16     
-128   -1184  
-64    176    
304    -2704  
32     -112   
128    144    
-208   -128   
80     304    
160    -32    
-80    -848   
288    -48    
64     -1328  
224    32     
-192   -368   
-352   -1840  
-1088  -3312  
96     -1152  
0      96     
-128   -688   
512    -80    
624    0      
-736   144    
-48    160    
112    -576   
-64    -352   
256    160    
-352   -80    
48     144    
-112   -240   
176    -128   
-112   -80    
160    -352   
80     -64    
480    -480   
-1168  -80    
992    -208   
-416   -16    
160    16     
656    240    
-416   -64    
-560   96     
672    272    
304    112    
-672   -128   
112    -144   
336    -48    
-16    112    
-176   0      
-32    -96    
-48    -160   
272    -496   
96     -112   
-192   -1504  
384    -32    
-80    48     
160    112    
-400   -208   
64     112    
272    224    
-224   288    
-368   208    
224    320    
400    0      
-112   -160   
16     -112   
160    -400   
48     448    
48     -32    
-208   1216   
-304   624    
336    400    
-48    176    
-320   -48    
80     -16    
352    -96    
-304   -80    
-192   -352   
64     -16    
16     -112   
32     0      
32     32     
16     448    
160    -320   
-336   0      
16     -1520  
160    -16    
-16    112    
80     416    
208    208    
-192   96     
96     -384   
320    800    
112    240    
-240   -768   
-144   192    
-240   -704   
1936   1072   
0      -128   
-1328  256    
688    -1184  
-368   -512   
16     -192   
304    272    
48     336    
-80    112    
-288   -16    
656    -272   
-368   208    
-48    16     
-16    208    
208    -48    
-160   -224   
-64    -80    
64     -144   
16     -432   
336    64     
-144   -1168  
-400   208    
880    -192   
-496   352    
528    -16    
-144   32     
-384   144    
-208   -384   
400    -256   
16     -176   
-80    16     
112    -112   
-48    192    
336    -400   
-32    240    
-96    112    
160    -80    
-16    -96    
176    16     
-208   32     
32     16     
-128   -288   
32     -112   
-112   -64    
-592   -208   
512    288    
-208   -96    
-112   32     
-416   -608   
1008   1184   
-272   368    
-864   96     
1024   16     
-752   -272   
-128   160    
544    160    
80     -80    
-48    -64    
-240   -112   
-624   32     
0      128    
-96    -176   
96     32     
-368   272    
256    160    
64     224    
-528   48     
336    160    
-464   -96    
-96    16     
672    1200   
-976   -976   
-880   80     
544    768    
176    -336   
-80    16     
-464   -16    
256    80     
-160   -64    
-80    48     
-304   0      
-224   -64    
-32    -32    
-240   -176   
-224   48     
-672   96     
-32    -64    
-976   -480   
32     48     
-352   -80    
-80    176    
48     -112   
-384   -272   
-96    -48    
288    -16    
-272   352    
64     480    
688    -112   
-208   -32    
-496   160    
176    -224   
-448   96     
-32    -336   
112    448    
752    -272   
-736   640    
64     -32    
-64    0      
288    -80    
-144   128    
-272   80     
-48    192    
336    112    
-176   -176   
-416   -400   
336    -1104  
32     64     
560    288    
-384   1280   
-240   192    
-624   -1136  
-96    128    
-496   560    
-304   -448   
720    176    
-576   416    
-320   752    
320    368    
80     -224   
-64    -80    
-176   96     
-160   208    
-208   -160   
144    -144   
-144   160    
-384   -352   
224    -288   
288    80     
-224   416    
-112   -160   
0      -96    
144    224    
160    368    
288    752    
-128   -48    
16     0      
240    32     
-352   -112   
256    432    
-64    128    
-176   64     
272    16     
-96    128    
-48    112    
80     32     
-224   112    
464    800    
-736   -608   
-32    -1232  
208    -240   
-64    352    
-208   96     
-464   -128   
288    144    
-192   -544   
-176   -64    
112    -112   
-64    -384   
-176   368    
-32    -80    
16     48     
-448   -624   
592    -960   
0      -640   
-128   80     
-32    1440   
112    176    
-176   1120   
-224   256    
16     -576   
-16    224    
144    -64    
176    384    
-160   176    
-352   448    
160    304    
128    528    
64     -608   
-80    -192   
-176   336    
224    -16    
80     32     
-16    -304   
-48    80     
96     160    
240    16     
-768   -144   
-160   -240   
320    16     
352    -64    
-512   144    
-784   -432   
1216   -400   
-848   816    
240    320    
-304   96     
-96    16     
-160   -400   
-192   -272   
-128   -48    
-112   -32    
64     80     
272    0      
-208   16     
-144   -128   
32     80     
80     -224   
144    -384   
-16    48     
-128   256    
-224   -112   
272    -320   
336    -176   
-288   320    
-112   224    
48     160    
160    368    
160    -672   
-224   464    
-144   112    
32     160    
192    32     
96     -496   
0      416    
176    -144   
-160   -128   
256    400    
-16    -400   
-16    80     
400    128    
16     80     
80     -144   
-80    176    
352    -48    
-272   -320   
256    32     
-128   128    
-16    160    
80     32     
16     -160   
864    1296   
-800   2016   
176    176    
768    -544   
-1536  -624   
576    64     
272    144    
-736   -48    
400    -80    
-192   32     
80     16     
-336   -32    
272    112    
-32    160    
80     224    
-496   80     
368    -752   
16     496    
-32    208    
96     384    
80     -48    
96     320    
320    -864   
-1152  384    
1136   16     
-240   144    
-688   128    
448    -80    
96     32     
240    32     
-112   -128   
-128   -560   
-304   96     
272    0      
176    208    
32     -16    
-432   176    
384    272    
-32    -128   
352    -288   
-64    80     
-304   288    
-144   -256   
960    160    
320    336    
-16    -400   
96     -944   
-576   -160   
416    -1584  
352    -96    
-192   -112   
-128   -64    
-208   176    
272    112    
-112   64     
-16    16     
240    544    
32     336    
176    80     
352    288    
112    240    
-592   -272   
240    144    
464    -1504  
-80    128    
-288   -144   
592    480    
336    -352   
48     160    
752    288    
-832   -1424  
-1056  2352   
2256   112    
-1504  336    
-272   -224   
528    -176   
288    -96    
-48    -160   
208    -512   
-336   144    
-496   -992   
784    -48    
-112   -128   
-144   -32    
-224   -192   
288    48     
368    96     
-272   48     
208    144    
144    384    
-192   352    
128    240    
480    -144   
-704   -112   
448    528    
112    -832   
-592   272    
864    32     
-608   -80    
48     144    
112    -32    
208    80     
16     48     
-48    128    
416    -288   
-608   240    
752    -128   
-192   96     
192    -624   
80     128    
144    -784   
-160   32     
-96    32     
400    -16    
112    112    
-496   32     
304    112    
160    -336   
-320   -96    
128    -64    
-448   -48    
704    -176   
16     -352   
352    -560   
-368   160    
160    -128   
448    0      
-192   112    
-32    432    
-256   336    
416    176    
192    160    
48     -144   
-112   48     
-160   -192   
288    160    
192    -144   
0      224    
-192   320    
528    416    
-352   -48    
-112   160    
176    16     
64     -640   
48     -48    
16     -752   
96     -48    
176    -272   
-128   -640   
-32    -208   
96     -1696  
64     -272   
-640   1792   
1184   -896   
-1552  288    
416    -528   
896    -272   
-576   -144   
-224   -160   
32     112    
384    -656   
32     -64    
-240   112    
-192   -368   
48     -48    
208    -1248  
16     16     
-64    128    
16     -288   
16     0      
112    -80    
160    -384   
256    864    
-928   -480   
320    640    
752    800    
-304   -576   
-224   -16    
-112   -384   
240    -336   
256    -208   
-64    -96    
-144   -336   
-144   80     
304    -272   
144    -64    
-304   -608   
32     -224   
-192   192    
192    -32    
-80    -48    
96     -208   
-944   -160   
-544   -48    
432    -80    
64     16     
176    -272   
-160   -288   
0      -96    
208    -224   
-192   -384   
288    -496   
-1664  -1344  
1328   -160   
368    -896   
-1760  16     
1296   64     
-96    -160   
-320   832    
64     240    
-352   80     
368    112    
272    -80    
-80    64     
-192   96     
48     -192   
-160   -128   
224    -80    
-176   -16    
144    0      
96     -144   
-96    32     
-192   -192   
1072   1088   
144    -32    
-1264  -192   
1344   -688   
-288   -256   
48     992    
800    128    
-368   -192   
48     -448   
-352   32     
384    -32    
192    64     
-160   32     
96     352    
-336   368    
144    -160   
64     208    
160    240    
-336   176    
128    -64    
144    16     
0      -176   
-368   384    
880    0      
48     208    
-656   -160   
704    -64    
-560   176    
-96    -288   
-224   -112   
368    352    
-144   416    
-64    96     
128    -96    
-752   800    
-480   272    
-112   -448   
-32    -128   
208    -560   
-224   -224   
96     -128   
32     0      
-160   -272   
-128   -48    
80     416    
-432   320    
-416   -128   
256    -352   
-64    32     
-320   -496   
704    1152   
960    -528   
-960   224    
-64    144    
-96    80     
656    304    
128    -880   
-288   -240   
48     752    
-320   160    
496    -304   
-96    272    
-304   160    
-48    -16    
528    -160   
160    960    
-912   -208   
-368   736    
416    912    
-704   128    
64     -640   
-1120  16     
-240   0      
-96    128    
560    -528   
-416   -128   
256    976    
-240   -464   
112    -752   
-240   -304   
-128   224    
-32    -208   
224    48     
-208   -704   
-224   320    
-128   1152   
-560   -528   
-64    -544   
-256   -32    
-528   -80    
160    272    
0      256    
128    -592   
128    -144   
-272   336    
352    592    
-496   -304   
240    -432   
-560   496    
48     224    
-32    -784   
464    -624   
-736   304    
-96    160    
48     112    
-32    208    
48     -512   
-144   -640   
-112   1584   
-112   800    
-32    -240   
-32    -144   
64     128    
208    96     
-80    640    
-528   496    
48     320    
240    -400   
192    400    
-32    560    
-784   16     
80     -480   
160    -272   
160    272    
-48    -80    
64     -288   
-352   -1104  
256    -816   
-48    0      
-400   64     
864    1648   
-1776  1808   
448    -240   
-112   -752   
288    -912   
-240   384    
512    720    
-576   352    
-288   704    
144    -80    
160    304    
-32    -96    
16     -144   
-176   448    
-80    32     
128    32     
192    -320   
-352   80     
-48    112    
-80    -96    
480    688    
-512   1424   
384    240    
-336   1088   
-240   -192   
-32    16     
160    672    
80     240    
-224   16     
128    -192   
-80    128    
-128   80     
64     -64    
-16    -96    
-224   272    
624    912    
-336   944    
-336   -560   
0      0      
144    -320   
-208   176    
-32    96     
320    48     
-160   112    
-128   -112   
-208   48     
288    -160   
16     176    
-176   0      
-272   256    
-496   1760   
1648   256    
-832   128    
-528   -432   
800    432    
720    -544   
-1056  -528   
464    -240   
112    256    
-496   0      
496    160    
-256   64     
0      112    
-80    -176   
144    112    
-48    -128   
304    304    
-64    256    
-128   96     
304    208    
-96    16     
-592   -592   
48     -336   
-48    16     
-192   32     
-112   304    
-16    -48    
144    128    
-528   -48    
160    320    
-48    -112   
0      160    
192    -16    
-240   80     
-336   -32    
176    96     
128    -112   
288    240    
-144   -80    
16     -224   
240    0      
-480   -224   
1184   240    
-64    400    
-1568  -112   
208    224    
384    464    
-288   32     
288    416    
-112   208    
-752   272    
256    80     
512    144    
-368   0      
-32    256    
320    32     
224    496    
16     384    
-528   288    
-288   304    
96     32     
928    432    
-128   -32    
-480   176    
368    112    
-224   0      
720    32     
-688   -112   
-400   16     
992    1360   
-1280  -2624  
-1552  960    
1952   -512   
-1472  -448   
800    192    
64     224    
32     -80    
-304   768    
-192   80     
432    336    
512    -32    
-544   32     
80     48     
48     160    
384    -128   
80     208    
112    96     
-720   32     
464    -144   
848    -416   
-832   16     
576    -352   
-592   192    
384    144    
256    0      
-528   160    
688    128    
-96    320    
-208   80     
176    464    
240    208    
-208   336    
240    -48    
-688   -240   
176    -192   
176    208    
0      -48    
-96    288    
384    16     
16     112    
144    16     
-240   48     
144    192    
208    -64    
-384   -48    
-32    80     
112    208    
-16    128    
80     768    
512    688    
-64    384    
128    -304   
-128   112    
64     256    
96     -96    
0      160    
160    336    
-96    96     
-128   16     
352    64     
112    96     
-128   -208   
-16    176    
80     224    
96     -16    
32     96     
-80    -16    
112    64     
-64    -1776  
-240   -448   
96     -512   
-64    -16    
192    496    
288    288    
-32    432    
-336   -32    
-32    -144   
368    -48    
-352   128    
16     48     
80     112    
-144   1856   
2048   -720   
-1856  -496   
-400   400    
1328   1136   
608    320    
-768   -768   
-32    -400   
176    -224   
48     -144   
32     -384   
80     -288   
-208   528    
80     96     
304    48     
-16    -816   
-336   -160   
112    -976   
96     -48    
48     -1888  
416    16     
-592   1312   
400    -560   
-384   -304   
304    480    
-336   -208   
112    192    
-80    -160   
496    32     
-176   400    
0      -176   
32     160    
64     -48    
16     -224   
16     -480   
48     64     
0      176    
304    96     
-128   -144   
0      -80    
-256   272    
336    16     
-192   -80    
-144   32     
176    288    
-112   -960   
144    16     
-144   208    
128    160    
128    64     
-624   1664   
3248   -1136  
-1728  -160   
-192   -1072  
1408   320    
-128   -128   
-544   1040   
528    -640   
-368   -2272  
80     384    
240    464    
208    16     
-224   -160   
128    48     
272    -112   
-64    304    
112    96     
-32    -96    
0      -96    
128    144    
752    864    
-1728  -912   
-976   192    
2400   -944   
-976   -224   
-64    272    
720    -272   
-176   -480   
-96    272    
272    -192   
-192   176    
-192   240    
112    160    
272    352    
-64    -592   
-144   -544   
256    336    
-208   288    
384    1072   
464    -1760  
-384   32     
-144   -160   
192    272    
-384   -816   
176    -256   
240    464    
-864   -928   
208    -560   
416    192    
-352   -192   
448    -944   
-32    112    
464    -432   
-544   -112   
384    -16    
-448   -192   
-320   0      
1120   528    
-1056  128    
-32    -352   
128    -224   
0      16     
256    -80    
-672   112    
-80    -64    
288    -96    
-208   -32    
-96    -832   
-192   -320   
288    112    
816    -208   
-2336  -432   
512    160    
928    -1088  
-48    -864   
-560   -288   
-192   -432   
560    672    
288    160    
-144   928    
-256   -480   
0      512    
80     -96    
160    -448   
-368   -448   
-144   -128   
272    -592   
-112   -80    
-32    -608   
-160   -480   
16     -224   
32     -32    
-160   32     
1184   -512   
-1152  -160   
352    -80    
128    224    
-16    400    
224    -1216  
-336   -1728  
80     -80    
-64    64     
16     112    
160    -576   
80     128    
0      -544   
0      -176   
640    208    
80     800    
32     848    
-64    1008   
48     784    
400    -80    
-688   -608   
288    480    
-192   704    
224    -368   
592    16     
-352   -32    
-48    -320   
-192   -1152  
0      -944   
384    -192   
112    1808   
-912   -1504  
-1056  752    
1056   1056   
-496   -1392  
-528   -624   
-48    -768   
-112   96     
-80    -304   
-128   -448   
160    48     
-192   736    
112    -896   
0      144    
-176   -144   
128    336    
608    912    
-592   464    
-144   288    
368    144    
-192   288    
-112   -64    
-192   -288   
272    -1296  
-256   -208   
112    -112   
48     224    
80     -464   
224    1696   
1472   -96    
-1136  64     
304    160    
0      -480   
48     -1184  
-320   -912   
32     -1184  
-160   96     
272    368    
-224   32     
192    432    
-16    -432   
16     -336   
368    -16    
-368   224    
-160   -160   
288    -256   
-160   0      
64     0      
-272   272    
784    -400   
-736   -16    
320    -64    
288    48     
-224   160    
208    80     
-240   -320   
192    -144   
-320   32     
304    160    
-224   -48    
-1232  -192   
-176   16     
272    112    
80     -112   
-224   -160   
-240   -400   
16     -112   
272    -80    
-64    -16    
144    144    
-304   -512   
384    96     
-176   128    
240    128    
-96    128    
16     80     
-144   64     
-144   544    
1424   -864   
-2880  1040   
608    128    
864    128    
-464   -32    
-432   -288   
96     -224   
240    32     
-432   -336   
48     144    
-48    -16    
80     240    
-80    -144   
-16    128    
-640   -128   
272    96     
-960   16     
-112   -64    
-32    64     
80     -64    
-80    -544   
1328   608    
-1104  64     
-16    -816   
-80    128    
128    -688   
-560   -80    
784    256    
-64    176    
-48    -48    
-496   208    
-544   0      
416    48     
-160   -176   
128    208    
0      -80    
-112   400    
-224   -80    
-272   -64    
928    32     
-240   -64    
-400   -592   
-512   368    
528    16     
-400   -48    
832    -144   
128    400    
-464   368    
-160   -96    
-224   192    
-208   160    
-208   -16    
-80    80     
96     96     
32     -304   
-464   -528   
-176   -272   
320    464    
16     -80    
80     -144   
-192   64     
16     -112   
-64    160    
-608   80     
192    144    
-32    -176   
144    0      
144    16     
-512   0      
-688   -2208  
1152   -528   
704    -32    
-1136  560    
-320   176    
128    -240   
64     -160   
-80    272    
160    -176   
-160   112    
16     64     
-240   64     
256    -16    
-80    64     
16     112    
192    32     
-320   192    
-112   80     
-112   48     
352    32     
-720   -400   
544    -16    
-192   -160   
112    32     
544    -16    
-272   16     
-368   160    
336    160    
256    160    
-240   240    
-304   96     
176    176    
128    -80    
64     -80    
-112   192    
320    352    
96     512    
-304   128    
112    48     
80     -32    
-80    16     
-144   -48    
-48    -16    
-64    -256   
64     -240   
352    -176   
-208   -16    
48     352    
288    288    
-256   272    
64     304    
224    144    
-224   -896   
-272   -80    
96     -64    
48     480    
32     1312   
48     848    
144    64     
-112   64     
-80    -16    
272    80     
608    688    
-1024  544    
544    496    
320    560    
64     432    
-64    720    
-64    528    
144    576    
208    384    
0      -80    
96     -48    
-32    128    
64     272    
48     208    
96     96     
192    128    
-304   -656   
48     -208   
80     64     
32     256    
-448   1856   
1184   -384   
-1104  288    
144    336    
176    -688   
-96    336    
-128   -432   
32     -48    
-32    272    
160    176    
128    48     
-192   272    
-80    192    
192    0      
64     80     
-192   -32    
-96    608    
112    96     
0      240    
-64    -112   
256    -448   
-688   -32    
608    128    
-240   -336   
336    160    
144    64     
-432   768    
320    1008   
-240   496    
-144   32     
224    -32    
-96    432    
-16    -80    
32     -96    
192    224    
176    -112   
-80    -16    
-192   208    
208    16     
192    208    
-32    112    
-112   64     
-80    320    
-64    -176   
128    -96    
-64    -112   
32     -704   
-16    192    
0      64     
272    48     
-1328  1808   
3328   -816   
-1216  656    
-304   1216   
784    144    
208    192    
48     416    
-32    1008   
-352   -1344  
80     304    
64     416    
-144   -528   
-64    144    
192    80     
112    80     
32     528    
-128   -176   
144    464    
-16    -112   
-32    144    
384    -176   
-2112  832    
992    -48    
-432   32     
336    -736   
-128   304    
16     -880   
-64    -480   
-128   -752   
384    1040   
-224   928    
160    480    
240    0      
-464   -288   
464    576    
272    256    
-336   864    
448    1440   
128    976    
-48    176    
-48    224    
144    240    
-96    672    
-144   -1760  
-288   -400   
416    608    
128    1408   
-560   624    
592    544    
32     80     
-560   256    
96     -256   
464    32     
112    464    
-304   -352   
-288   -688   
256    -160   
144    960    
-400   304    
-304   352    
480    -1440  
-128   176    
176    784    
-480   816    
-144   -320   
848    240    
208    16     
160    240    
-400   384    
-240   240    
-144   -2096  
-720   -272   
128    -496   
-192   432    
512    -784   
-624   -1136  
-32    -608   
-128   -544   
256    -208   
-96    96     
0      1504   
-272   -128   
144    -368   
320    -48    
-48    80     
-144   272    
288    -240   
432    64     
-144   -288   
-496   112    
384    -128   
0      112    
224    112    
928    1392   
-864   1584   
368    1232   
480    -208   
112    -144   
-496   352    
16     128    
640    320    
-304   -16    
32     48     
272    48     
336    208    
-48    -128   
-432   64     
32     16     
288    64     
80     288    
-480   176    
192    -1328  
352    -176   
240    432    
128    256    
-272   176    
432    352    
-496   64     
240    -112   
144    -48    
-48    -32    
-256   -400   
480    -768   
448    -704   
-80    -32    
-224   -64    
160    -448   
176    448    
-272   352    
32     -128   
160    -976   
-480   -304   
384    64     
384    -240   
-176   64     
-144   -144   
240    -384   
-32    368    
-64    -448   
96     -224   
-64    -144   
-272   -224   
560    -384   
-16    -368   
-160   64     
224    -48    
-368   -112   
240    -32    
272    -176   
-192   32     
-256   144    
1232   2576   
1296   384    
-1520  400    
288    -160   
-400   368    
736    -208   
-496   -160   
-368   -560   
400    -528   
-32    16     
480    -160   
-64    48     
32     208    
-208   672    
240    -96    
192    448    
352    -240   
-432   -64    
160    96     
64     0      
-448   -912   
160    -544   
-400   176    
-480   16     
816    48     
-288   -304   
240    -544   
-192   -208   
336    -144   
96     208    
112    -96    
80     96     
-160   -80    
-144   -112   
464    -256   
-48    -16    
-176   -16    
320    240    
-560   -64    
-128   -32    
416    64     
80     -64    
16     -48    
-32    -544   
-352   -96    
336    -32    
-304   288    
352    48     
-48    -64    
32     -832   
-1392  -1280  
-112   -368   
0      64     
160    96     
0      -240   
-352   0      
192    -352   
-432   112    
112    -496   
96     128    
144    -400   
-112   64     
96     128    
-224   -176   
-64    224    
240    -112   
-176   16     
-256   -176   
0      -48    
-16    -208   
416    688    
-1328  -304   
720    64     
-320   -1088  
-592   -256   
1216   -1792  
-848   16     
240    -320   
-96    112    
-16    -96    
-288   16     
-192   48     
288    -112   
-160   80     
64     16     
-336   128    
304    -288   
96     -48    
-64    -128   
48     160    
-112   -128   
-288   -512   
-112   496    
128    -112   
-1392  16     
512    -224   
480    0      
320    240    
384    -432   
-368   240    
0      192    
-64    -400   
160    192    
64     128    
-464   160    
-32    176    
-624   80     
-336   -464   
48     -16    
-176   160    
-320   16     
352    48     
64     -32    
-368   -96    
80     32     
-144   176    
-512   -176   
256    208    
-608   -144   
1008   2928   
1264   640    
-464   416    
992    -624   
-976   -144   
112    176    
864    128    
-288   -192   
176    48     
-624   -144   
-176   128    
256    -16    
-48    192    
272    16     
-688   -192   
-192   -80    
352    32     
-384   -32    
-336   160    
-416   80     
656    1024   
-144   1296   
-128   224    
144    -128   
-96    -16    
-128   416    
544    256    
-752   -144   
256    -288   
432    -80    
-48    256    
-592   48     
-144   -32    
816    320    
-608   48     
-272   288    
192    560    
384    128    
-1008  224    
-112   192    
-48    -32    
-32    208    
272    176    
-240   224    
-16    416    
736    240    
-512   160    
-128   352    
64     336    
192    416    
224    624    
-160   128    
288    784    
528    -160   
-304   -16    
-896   -208   
0      -192   
-128   -224   
384    496    
80     912    
-128   224    
-512   -816   
-16    -448   
128    -16    
-48    -112   
112    464    
-240   80     
208    -304   
-256   256    
128    112    
-816   192    
-64    -48    
-16    96     
176    32     
128    96     
-400   -240   
-32    -208   
192    -464   
-720   -1008  
288    -32    
352    -80    
-336   128    
240    864    
-32    288    
-368   -80    
-96    -48    
-16    128    
-48    32     
160    240    
32     32     
-16    -96    
-16    -112   
-16    272    
224    64     
-64    176    
-112   96     
240    160    
-144   176    
208    -48    
-16    0      
-272   240    
-160   112    
720    -288   
-288   240    
560    -448   
-256   -240   
-288   528    
-48    -112   
544    592    
544    160    
-880   368    
-256   112    
672    -160   
-32    -64    
-64    48     
-288   160    
-16    16     
-16    128    
80     16     
16     128    
0      -32    
160    48     
-32    128    
32     96     
-64    -64    
-256   -272   
0      208    
112    -64    
-240   -240   
832    640    
-720   672    
976    -80    
-3088  -496   
176    80     
1040   -864   
-560   -944   
-64    -528   
-96    96     
-112   -896   
704    784    
80     -80    
-304   128    
-144   304    
64     -384   
288    416    
-208   -96    
-320   -352   
144    -80    
224    -352   
0      1104   
-80    -32    
-208   -720   
1328   688    
-1184  -144   
-560   208    
1120   1472   
-800   1568   
-576   1680   
592    1136   
352    -352   
-816   -464   
496    64     
-16    80     
-224   -16    
400    80     
128    -64    
-224   32     
176    -32    
-464   64     
352    -160   
176    96     
-432   176    
192    144    
240    288    
48     272    
-1008  -800   
720    -656   
160    96     
112    224    
416    624    
176    128    
-880   384    
32     -128   
64     144    
592    -224   
-256   -96    
-320   -768   
960    -1088  
-80    -400   
640    320    
-352   80     
-80    -16    
336    144    
240    160    
-496   288    
-96    -80    
128    48     
528    -16    
176    192    
-48    784    
-480   112    
-80    -2928  
-784   -1008  
272    240    
-32    -368   
576    -352   
112    -320   
-720   -256   
528    128    
192    -272   
-48    -320   
-160   -224   
32     112    
80     192    
400    0      
-48    64     
-704   -64    
576    192    
-32    64     
512    -464   
-1024  -1056  
240    -912   
192    -528   
48     272    
80     48     
-128   64     
-96    544    
32     480    
-96    336    
400    -592   
-336   -144   
320    -48    
-128   -160   
176    -240   
144    -976   
32     128    
-96    208    
208    0      
-48    -16    
32     -96    
-128   96     
32     0      
-160   -64    
448    0      
-96    32     
80     128    
80     160    
64     -160   
160    -96    
-304   -480   
64     336    
608    -1424  
-176   192    
0      640    
720    96     
-192   -272   
-208   320    
640    0      
-80    144    
32     576    
-432   448    
304    64     
112    -160   
-64    16     
-224   -240   
80     144    
160    -160   
-48    -272   
0      -240   
96     432    
-272   96     
480    -144   
-128   80     
112    256    
-272   192    
96     16     
320    0      
-32    224    
-80    240    
48     0      
96     64     
80     -272   
-192   1840   
2736   -1264  
-1968  352    
464    1024   
1248   -96    
-880   192    
48     -144   
-48    528    
-96    192    
128    0      
32     16     
64     64     
-192   -320   
16     192    
624    -2224  
-560   224    
288    -96    
16     96     
-80    48     
96     96     
560    -448   
-1648  864    
1104   96     
-16    -304   
-560   192    
688    -448   
-304   48     
-48    -80    
-128   208    
384    -176   
-368   112    
-16    -160   
224    256    
32     -48    
48     256    
512    160    
-544   208    
176    -16    
-304   -16    
464    0      
-288   -240   
288    112    
-368   16     
112    160    
320    -80    
-512   192    
592    -752   
-400   160    
112    64     
224    432    
464    -224   
-224   224    
960    48     
-480   -768   
-384   -224   
288    -288   
528    400    
-48    304    
-176   192    
-32    -336   
144    224    
96     -432   
16     -1136  
96     80     
0      -400   
272    160    
-64    -384   
80     -144   
96     16     
192    32     
-112   112    
416    0      
912    -240   
-672   432    
576    -272   
-448   -352   
-16    176    
720    480    
-1072  400    
272    -832   
16     80     
-32    -144   
96     -32    
-96    128    
0      -272   
224    80     
80     -624   
128    -352   
320    -416   
-48    304    
-32    32     
128    0      
-416   -96    
480    304    
224    -192   
-336   96     
-256   -608   
144    112    
-144   112    
-192   -208   
384    0      
224    -656   
-416   -32    
16     -192   
432    -48    
192    432    
-400   112    
-96    160    
688    176    
-528   -112   
160    48     
240    32     
-144   0      
-832   -240   
-208   64     
176    80     
-224   48     
0      96     
-208   -400   
752    -496   
224    -2784  
-2608  -848   
2032   0      
480    160    
-768   80     
112    496    
-416   16     
416    -80    
240    80     
-240   176    
-400   -96    
-32    112    
336    -112   
176    -48    
-576   208    
16     -48    
224    192    
0      16     
160    464    
-16    736    
48     960    
176    416    
-224   -320   
-240   -48    
128    -608   
48     112    
256    -272   
-1136  -240   
208    -368   
16     464    
288    -368   
128    -752   
-96    -1408  
16     272    
-192   -80    
400    -48    
-576   -256   
432    -704   
64     -416   
-160   128    
96     320    
0      -16    
-80    144    
-176   112    
288    -160   
208    -1120  
-736   -1056  
544    -352   
16     1312   
-112   -176   
-224   -336   
336    976    
-704   432    
576    1200   
32     1008   
-512   464    
256    432    
80     272    
-32    -96    
80     -48    
-128   -560   
128    176    
96     -224   
-176   48     
-64    288    
-96    144    
48     640    
-80    -48    
-256   -304   
16     -16    
176    -48    
-80    -16    
-128   0      
-160   -400   
64     256    
96     -272   
48     16     
32     -48    
-272   -112   
-48    160    
-464   128    
-160   80     
320    -208   
-416   176    
688    -112   
-272   0      
-432   288    
48     -272   
64     -432   
-32    144    
-256   144    
-608   192    
80     -96    
-48    -192   
96     48     
-800   48     
288    -304   
-400   -240   
-288   -176   
112    -48    
-144   -96    
416    -448   
-1392  256    
656    -144   
144    416    
-192   -96    
-128   -128   
-96    -160   
64     -80    
192    -96    
480    -256   
-144   176    
-848   576    
320    -144   
256    -480   
-224   -32    
-208   -32    
336    656    
80     192    
192    416    
0      0      
-288   160    
352    -16    
-192   -400   
48     -192   
-144   -128   
144    304    
-112   96     
304    -160   
-1040  544    
96     496    
-624   2016   
3008   -272   
-1216  -832   
-32    -832   
224    464    
464    -64    
480    880    
-752   608    
-656   -1344  
304    -1344  
16     -736   
-240   -224   
80     240    
-544   -48    
352    208    
-80    -160   
-176   -128   
-320   -736   
144    -560   
160    -240   
352    576    
-2000  128    
160    688    
816    1152   
-1376  176    
-16    -1040  
-64    -1488  
240    -352   
-1248  -288   
544    544    
-1392  -384   
-352   48     
-192   -256   
208    96     
64     -64    
-400   192    
304    96     
80     320    
304    176    
-96    80     
-160   128    
-64    176    
-272   48     
-784   -64    
112    336    
464    -448   
48     320    
-256   80     
32     96     
128    704    
704    -64    
-464   0      
-160   96     
368    -48    
160    112    
-64    -144   
-1104  272    
704    -256   
288    112    
0      160    
-320   304    
-256   176    
-64    -176   
864    -192   
-512   112    
208    0      
32     80     
288    96     
-224   -384   
176    -784   
-240   2800   
1376   160    
-1424  -272   
-464   -96    
608    -16    
464    160    
-704   -48    
-272   272    
-32    -16    
544    304    
-112   -80    
-208   176    
-16    64     
-224   240    
224    -160   
-64    304    
-80    -144   
-144   208    
496    -192   
-976   192    
832    -176   
-288   304    
288    -80    
-480   224    
32     528    
144    432    
176    320    
-192   112    
-176   160    
272    144    
-464   96     
224    -144   
48     32     
48     -288   
32     288    
-256   -64    
288    -224   
448    -544   
-128   -304   
160    176    
-128   192    
-320   -80    
512    32     
-96    -64    
-288   112    
128    0      
16     -208   
288    -272   
-496   -272   
256    0      
224    112    
128    816    
-800   448    
32     -96    
416    -512   
-800   256    
704    496    
-400   416    
-16    544    
-80    240    
128    112    
128    -48    
-272   64     
176    448    
-336   432    
288    240    
48     -48    
112    208    
-272   496    
-208   128    
368    0      
240    112    
-208   64     
-224   208    
128    -144   
-144   112    
128    -32    
-160   128    
32     -48    
-96    288    
-560   -1488  
1984   -864   
-1264  624    
304    -96    
80     160    
-304   480    
416    -160   
160    720    
-96    272    
-432   -240   
304    -48    
-32    160    
288    240    
-80    128    
32     -144   
80     0      
-160   192    
304    240    
-208   128    
-64    240    
96     80     
-416   768    
1424   -752   
-1008  112    
16     -64    
640    16     
-160   16     
160    384    
-368   48     
-48    -304   
432    96     
128    128    
-192   256    
-16    -32    
176    80     
-192   32     
368    96     
-320   -112   
0      304    
336    -304   
-336   192    
240    -16    
-128   0      
32     80     
448    -192   
-464   64     
-64    320    
304    80     
64     16     
-208   112    
1600   1744   
-1408  -576   
-2528  -128   
2576   352    
-240   224    
-1504  48     
1168   256    
64     656    
-528   176    
496    -128   
192    32     
-128   -1568  
-176   64     
560    304    
-432   0      
112    496    
96     -48    
-112   80     
80     256    
-32    288    
112    160    
464    1120   
-1328  -496   
64     352    
880    400    
-160   -64    
240    16     
-304   496    
96     -112   
96     -128   
-112   -32    
160    -32    
-272   128    
32     80     
224    -144   
176    144    
-192   192    
-96    -688   
-112   464    
224    -96    
-80    -160   
-96    -224   
592    848    
288    -1520  
-416   16     
240    512    
336    16     
-272   16     
160    240    
0      -16    
-48    -32    
-16    80     
240    0      
-16    208    
-176   -256   
-16    -320   
480    -400   
368    -64    
-368   -320   
848    400    
-736   288    
64     -16    
0      64     
80     96     
112    0      
-64    0      
240    -240   
-288   64     
336    -80    
464    -272   
-1072  -848   
1648   -1168  
336    32     
-1312  128    
160    384    
912    80     
-368   112    
288    -96    
208    736    
176    368    
-448   -208   
336    224    
-32    -80    
0      304    
144    -80    
272    336    
-592   160    
192    -224   
464    -480   
-208   272    
-208   -384   
-64    -240   
240    -256   
48     -768   
-64    -1728  
32     -288   
96     48     
96     512    
96     736    
-160   -64    
160    -336   
128    -368   
-160   -336   
128    176    
-32    -240   
96     256    
128    288    
272    944    
-432   512    
96     -368   
224    -192   
-64    -128   
64     96     
48     352    
48     1056   
560    128    
-192   -1040  
128    0      
-464   -912   
208    224    
-288   -352   
-80    -432   
528    -192   
-1024  -256   
32     -288   
-544   -704   
48     -240   
160    -944   
-160   -768   
256    528    
-96    -752   
256    -96    
-112   224    
-192   64     
-48    -32    
112    176    
-144   304    
-48    208    
-64    32     
-304   160    
-512   -96    
-16    128    
304    -144   
-256   -128   
240    48     
144    16     
144    80     
-80    -80    
-48    560    
160    -160   
368    -32    
-432   -576   
528    -880   
-48    496    
624    -304   
-624   -48    
-320   0      
496    -272   
192    0      
224    -80    
-32    -80    
-320   80     
368    -2384  
48     80     
64     64     
-224   32     
240    -16    
-16    160    
64     528    
-176   592    
-256   288    
688    -496   
-1280  496    
672    -64    
-96    320    
48     -736   
16     -144   
-80    -544   
-64    656    
48     400    
368    400    
-304   -16    
-432   -304   
64     96     
80     -112   
-176   96     
320    -256   
-272   752    
-416   464    
48     -704   
528    -320   
-336   704    
16     -320   
-432   -128   
512    -848   
208    -576   
-80    128    
-112   288    
-208   304    
176    -352   
-368   -144   
-1504  464    
2432   -416   
-320   -416   
-1472  -1216  
-176   -960   
304    -144   
-160   -656   
160    -496   
-256   -1280  
-320   -16    
32     -176   
80     32     
-144   -224   
288    -64    
-368   -384   
48     -96    
-256   16     
224    64     
288    128    
-32    -192   
80     720    
256    -1344  
-1600  80     
1904   -176   
-432   272    
-560   -192   
944    -112   
-496   96     
400    -16    
-176   0      
-160   48     
-96    64     
64     32     
336    192    
192    -64    
-368   32     
-1248  -352   
560    144    
0      160    
-544   0      
-128   96     
-672   -528   
-208   160    
240    224    
-128   -240   
-48    -336   
224    48     
192    -96    
-576   192    
16     -32    
80     208    
-112   -272   
-48    -224   
-368   256    
-80    -240   
-192   112    
96     -224   
96     -208   
-624   -80    
320    -240   
-176   -64    
-128   144    
64     -320   
-80    96     
-416   -416   
784    608    
352    -304   
-592   48     
416    208    
-336   2080   
144    3136   
608    528    
-1296  416    
-144   -576   
448    224    
-352   -144   
-368   208    
144    -32    
-240   256    
-64    -96    
0      288    
-176   -288   
-224   96     
-16    32     
-160   48     
-80    48     
96     -32    
16     48     
-32    304    
-752   -48    
-672   560    
592    -96    
-688   -16    
512    48     
320    -32    
0      -80    
-288   96     
768    -128   
-592   16     
368    32     
-144   -16    
112    0      
-224   48     
320    432    
-384   352    
-144   432    
96     -256   
-560   -128   
64     144    
-48    0      
176    -96    
-272   16     
64     -208   
-48    -32    
560    48     
240    96     
-432   224    
240    320    
112    128    
-32    96     
-112   48     
128    320    
-1680  80     
672    48     
-128   -48    
-240   -240   
224    176    
112    528    
320    368    
-96    320    
336    192    
-320   64     
80     112    
608    272    
-256   368    
-400   -240   
608    352    
-464   80     
-352   -1152  
32     -176   
-160   176    
112    0      
304    -272   
-272   64     
-240   256    
224    288    
240    -128   
176    304    
-672   432    
80     64     
-544   -1760  
1792   -928   
-1856  656    
512    176    
-480   32     
-432   -32    
384    64     
128    -128   
480    -384   
-464   256    
176    32     
208    -32    
32     96     
-144   16     
144    1008   
-48    272    
-16    -208   
80     -32    
-432   560    
240    240    
-16    -64    
-448   160    
1104   -576   
-704   256    
-288   -64    
432    112    
176    48     
-48    352    
-400   64     
48     -208   
32     -192   
192    -80    
128    112    
-336   304    
-112   160    
64     64     
256    16     
-576   -160   
128    96     
48     96     
128    16     
80     -48    
-64    16     
-16    16     
256    112    
-352   -80    
-16    176    
256    160    
16     80     
80     176    
1184   544    
-1696  1120   
320    432    
864    -112   
-832   -32    
-32    352    
736    464    
-240   640    
-64    208    
-96    80     
16     64     
256    -144   
288    128    
-272   48     
-304   -48    
480    320    
-240   144    
-176   48     
128    48     
288    96     
-144   48     
512    656    
-1824  -32    
576    320    
688    288    
-1056  48     
480    752    
-528   96     
-224   32     
256    208    
-496   192    
288    64     
-80    32     
-160   -80    
128    -96    
208    176    
-272   -16    
160    464    
-160   240    
-128   -16    
-128   -224   
32     -80    
-240   -128   
288    800    
-512   -112   
368    -16    
624    1520   
-1344  240    
-112   -208   
624    -32    
-272   256    
-16    -48    
-240   -64    
32     -48    
-176   48     
256    -128   
224    -144   
-496   896    
640    -464   
-240   -416   
-544   256    
-112   160    
144    16     
416    304    
-528   160    
-272   -544   
-32    -352   
464    -112   
-400   -560   
-80    -384   
336    32     
-944   -2272  
-512   -32    
256    448    
-432   128    
1008   0      
-768   1312   
-160   784    
208    -128   
528    48     
-352   -560   
-320   576    
64     -128   
16     144    
192    -48    
-160   -96    
-256   -224   
208    320    
144    208    
-80    400    
16     544    
288    400    
96     -112   
-240   96     
-128   208    
432    800    
-64    496    
-64    -880   
-304   -656   
320    672    
112    272    
-432   -1072  
128    256    
304    -512   
-80    -16    
-288   -912   
208    48     
112    -192   
-352   -400   
-496   -928   
352    496    
144    480    
80     144    
-160   208    
-96    -112   
160    -416   
-32    -192   
96     400    
-128   464    
-160   -128   
544    -768   
-48    128    
48     736    
544    992    
-160   1104   
16     592    
-192   416    
240    624    
-576   -880   
-112   -368   
304    -336   
80     224    
-144   -48    
80     -832   
-32    256    
-16    -656   
352    -208   
-144   -512   
-48    32     
576    992    
416    -16    
-64    -176   
-48    -48    
64     160    
96     96     
192    128    
-32    -304   
-256   -192   
672    -1072  
384    400    
192    -416   
-704   176    
512    896    
672    480    
-256   -464   
-576   -160   
432    -304   
-272   -160   
320    -192   
144    -208   
48     96     
-256   160    
128    -80    
144    -208   
208    288    
-16    -1040  
16     -128   
-208   -304   
192    160    
336    -64    
-192   112    
-384   -432   
896    -544   
-352   192    
432    112    
528    2256   
-128   480    
-96    -384   
144    112    
80     336    
-96    -784   
16     -1568  
112    -112   
224    -1872  
-144   48     
-288   -16    
128    -544   
352    -176   
-96    -496   
16     -320   
336    688    
-288   336    
-112   112    
64     192    
160    64     
352    -64    
-256   -656   
-160   112    
368    48     
-112   176    
-880   -272   
2240   64     
-1744  912    
-624   -624   
1152   80     
-592   -368   
0      -528   
-176   -848   
0      112    
400    160    
16     176    
32     -176   
112    64     
48     -144   
-32    -144   
-192   -16    
-48    -80    
208    -48    
272    96     
176    80     
-64    -64    
-48    -160   
-336   -2720  
320    -32    
240    -400   
-496   64     
736    96     
-80    48     
-96    -96    
-96    -176   
-464   208    
496    -32    
192    48     
-96    -160   
48     16     
-176   -336   
720    0      
-464   -352   
48     -160   
80     0      
-176   -96    
320    -112   
-96    -96    
224    176    
256    -32    
192    48     
224    480    
-448   112    
-208   512    
-512   -176   
304    80     
752    -16    
-96    -208   
-400   240    
160    -1424  
32     16     
320    -400   
128    -688   
-592   -288   
304    160    
16     160    
688    -32    
-304   160    
-608   96     
-240   0      
432    48     
16     -368   
-560   -192   
224    112    
-224   -352   
704    1216   
480    -1456  
-3184  -480   
1568   -672   
-64    -656   
-144   240    
-160   112    
64     -176   
0      432    
-176   -96    
304    128    
-624   -16    
240    -400   
-736   64     
0      -160   
-64    -32    
240    -352   
128    -128   
-544   -48    
-304   -496   
1360   64     
-192   -192   
-576   208    
272    48     
-832   -48    
208    -320   
816    208    
-416   -160   
96     544    
-304   -320   
384    416    
-336   -96    
-176   224    
128    -224   
-272   -32    
-48    -96    
-80    112    
-32    144    
48     -96    
-240   96     
272    80     
-240   224    
256    16     
-32    128    
48     -432   
-112   -80    
16     112    
-272   -16    
16     16     
336    -304   
-256   -80    
64     -32    
-256   -144   
624    -16    
336    16     
16     208    
-544   720    
-208   -80    
272    -608   
-560   -544   
-368   -80    
-400   -16    
160    -112   
48     -16    
-96    208    
-160   96     
64     -16    
224    -32    
-432   240    
144    -560   
-640   -112   
192    240    
0      -384   
80     -304   
-368   -416   
-128   80     
-208   -352   
80     -192   
304    400    
-240   352    
-160   -16    
-512   128    
832    2656   
1520   -512   
-2400  368    
304    -1024  
160    96     
304    144    
-464   -64    
-16    -752   
-288   -400   
416    -16    
128    272    
-224   -32    
-304   96     
-16    -576   
224    -256   
-32    112    
-80    176    
-208   288    
16     -272   
128    -32    
704    592    
-1488  720    
1104   32     
-624   32     
144    32     
368    160    
-416   -416   
-64    192    
192    240    
-112   -352   
-384   -144   
-208   -496   
-80    80     
224    16     
-16    -64    
-480   -16    
192    256    
144    -96    
-128   -176   
-16    -208   
-192   96     
-32    -112   
208    96     
-96    -176   
-240   -192   
128    208    
-48    0      
16     64     
-208   -96    
-432   -224   
304    160    
720    -912   
-432   -192   
496    464    
-640   192    
-304   32     
96     16     
288    -416   
-192   16     
-320   -304   
272    256    
-80    -48    
-480   -384   
-592   -496   
-48    -240   
-240   80     
128    448    
16     608    
16     416    
112    320    
-16    448    
496    -512   
-2320  -80    
2080   -688   
16     -80    
-1136  384    
-352   -208   
752    -544   
-144   -480   
-448   -80    
96     32     
16     64     
128    224    
-64    240    
-144   128    
128    16     
-160   -208   
528    -496   
-496   -496   
0      -592   
32     -128   
-176   208    
-176   -544   
128    -736   
-96    -480   
-752   528    
816    -192   
192    144    
-80    -336   
160    -96    
-224   -192   
-224   96     
-32    -288   
-576   0      
752    -688   
224    288    
-304   304    
304    -288   
-704   -832   
80     -144   
-48    80     
-544   128    
224    -144   
272    160    
0      -368   
-384   -528   
96     0      
-240   480    
192    368    
160    144    
-368   -2688  
-1360  -752   
304    160    
288    368    
464    -560   
-464   -528   
-320   848    
432    1152   
592    -1136  
-256   -288   
-80    768    
-176   96     
0      160    
192    -272   
-176   256    
-240   336    
48     528    
-272   272    
192    -352   
48     -480   
-240   128    
0      128    
384    208    
-32    -240   
-352   -144   
-176   -288   
80     -160   
48     -496   
384    -96    
-352   864    
-144   224    
112    144    
32     -256   
-96    -176   
176    464    
-80    672    
-112   336    
272    304    
-272   272    
96     -304   
112    -1232  
-160   -448   
-16    32     
-32    496    
416    -160   
-256   -208   
-128   256    
128    -544   
224    -976   
-80    96     
-416   336    
-16    896    
1520   -672   
-752   -304   
-672   -720   
608    -336   
-176   -592   
128    720    
128    1280   
-192   -1168  
-400   -896   
128    192    
304    640    
-224   -144   
16     -512   
272    240    
48     736    
-160   320    
240    0      
96     -1008  
-368   -144   
448    512    
-352   608    
16     224    
240    -880   
-272   -608   
128    112    
-80    -1104  
-656   464    
-96    352    
368    -16    
128    -1488  
-800   912    
800    -272   
-160   -336   
-368   -256   
96     -736   
320    -224   
-16    -48    
-464   -80    
272    -288   
32     448    
112    -640   
128    352    
-240   544    
160    80     
-240   160    
48     96     
-16    -144   
208    160    
-48    176    
-688   -912   
1040   -688   
-336   544    
-160   -432   
560    -96    
-384   416    
-96    -464   
-32    -160   
96     208    
-64    256    
96     256    
272    176    
-240   32     
240    160    
112    48     
-272   336    
-144   -272   
112    128    
272    32     
-240   -80    
144    128    
-128   -208   
-48    128    
416    -1136  
-576   16     
208    64     
-96    208    
176    -80    
96     32     
-512   -544   
-912   -784   
976    -400   
-224   96     
-448   0      
368    288    
112    48     
-288   -272   
-128   144    
272    -464   
-112   16     
-64    -960   
96     -16    
64     128    
384    112    
-224   160    
112    176    
144    16     
-272   64     
416    16     
-64    -16    
-400   -512   
-608   960    
1024   -144   
-752   -176   
448    -208   
304    -448   
-16    112    
-480   -176   
160    -16    
48     112    
400    96     
-176   48     
-96    -48    
0      16     
-32    -224   
176    32     
112    272    
80     880    
-544   -320   
-48    -272   
336    -544   
256    32     
-352   -32    
672    224    
576    0      
-544   -336   
704    -400   
624    144    
-352   240    
-64    96     
544    128    
-48    -400   
-32    -48    
128    16     
48     -16    
-96    112    
496    16     
224    464    
-464   192    
-32    112    
416    -224   
-112   640    
-112   96     
16     272    
80     -432   
-16    48     
-224   -336   
-352   160    
176    -336   
-48    -4560  
-2016  224    
1920   -288   
-1248  -144   
400    160    
832    48     
-944   448    
96     -208   
64     -48    
-304   -560   
208    -144   
80     -1184  
-464   -16    
256    112    
176    80     
112    -480   
-256   96     
112    -272   
-112   -400   
592    -1456  
-368   -192   
352    128    
-304   192    
-400   -176   
272    0      
-224   64     
176    -96    
96     80     
144    -16    
-32    -128   
-240   -960   
352    160    
-16    -128   
192    240    
-208   240    
336    -16    
-64    -96    
256    -576   
-544   -160   
80     64     
208    32     
-16    80     
-32    112    
128    -1440  
-224   -64    
224    64     
0      96     
256    96     
-592   -128   
416    -528   
128    -608   
-176   -288   
-880   256    
240    16     
-496   80     
400    32     
-48    -672   
-160   -1456  
-224   -1312  
-32    -112   
160    112    
-128   80     
128    -160   
240    16     
-336   -192   
-64    0      
-64    -192   
80     -64    
-304   -176   
208    -144   
-80    -176   
32     -192   
-320   -64    
32     -48    
-128   288    
96     -640   
112    384    
-128   -32    
80     -144   
-144   -96    
32     -16    
-176   1968   
1040   -816   
-1536  -432   
640    -768   
-176   448    
336    -320   
-336   496    
-288   -944   
144    144    
192    -880   
-16    128    
128    128    
-64    -80    
32     -400   
-96    -368   
96     0      
-80    192    
-272   -112   
-144   128    
0      112    
-16    -1024  
160    -848   
-128   544    
16     320    
368    -848   
-160   -240   
-16    112    
176    16     
-48    -192   
64     128    
-288   -16    
32     96     
96     -304   
256    -96    
-304   176    
336    48     
-160   224    
-352   -1024  
352    768    
96     -256   
-80    -112   
-80    368    
-144   -32    
144    -64    
112    -336   
-464   128    
32     272    
128    -112   
496    -528   
-1040  -112   
-96    640    
2192   256    
-1456  -96    
832    -448   
-80    -800   
-1392  64     
544    128    
-480   224    
-176   -256   
-32    448    
176    -192   
160    -176   
-112   352    
16     48     
16     -80    
-32    32     
224    144    
-1072  -560   
336    224    
-176   -640   
464    1232   
-1488  -640   
-464   192    
1600   816    
-784   432    
-304   -112   
-160   1152   
272    1904   
-240   1184   
496    -1104  
-640   -1216  
-320   32     
208    496    
224    144    
-240   -336   
-160   224    
48     80     
96     112    
320    192    
-544   -224   
-80    -128   
-784   -192   
-80    128    
16     -528   
1120   -704   
-688   0      
-64    1216   
656    -768   
-560   512    
192    -48    
-160   -96    
192    -144   
320    -320   
-800   624    
400    752    
-400   256    
-80    352    
-176   560    
-624   320    
800    -64    
-192   -80    
-336   320    
-112   -384   
-208   -304   
128    -480   
-400   176    
160    384    
-208   336    
176    128    
32     -32    
272    -1536  
-2160  -496   
352    -560   
-16    -288   
560    144    
-416   -368   
-464   -720   
-48    80     
128    144    
368    448    
-144   -80    
-320   -272   
-48    -512   
112    -160   
-192   512    
160    176    
-32    -112   
32     -176   
-160   -816   
-96    -400   
-160   -256   
-48    256    
384    224    
64     -48    
-144   464    
128    -624   
-288   -192   
48     -160   
176    -624   
-208   -1360  
-672   -672   
192    -112   
304    432    
-288   0      
-128   208    
-976   16     
-368   -80    
160    -64    
48     -160   
-208   -128   
-48    32     
112    320    
-384   304    
208    416    
-128   -336   
-288   144    
-96    80     
-240   -640   
144    160    
32     832    
-432   400    
-432   -912   
-80    -384   
512    160    
384    1312   
-464   1040   
192    1280   
208    1008   
-16    976    
208    192    
-800   16     
176    -160   
432    -80    
-304   -208   
208    160    
-368   224    
288    -128   
-368   96     
352    48     
-576   192    
112    -160   
176    80     
16     -208   
-160   16     
96     112    
432    864    
-384   1008   
48     448    
-160   -352   
-112   -176   
-192   -688   
592    -2496  
-576   720    
1200   -128   
-240   -16    
-368   272    
96     -592   
208    256    
160    -352   
-512   128    
192    80     
-96    208    
304    -144   
-16    272    
-336   32     
208    160    
-80    240    
96     -160   
-16    32     
112    192    
-16    256    
64     -1104  
-1008  528    
1296   16     
-1296  64     
352    464    
480    176    
-320   -176   
-496   -416   
144    -288   
448    320    
16     112    
-208   224    
80     160    
-64    32     
-176   64     
64     96     
352    64     
-224   80     
-64    -48    
0      144    
224    -96    
-192   224    
128    -176   
-80    64     
96     144    
96     144    
48     240    
160    32     
-240   160    
1008   -96    
-2384  -544   
1376   112    
-352   -96    
-480   96     
1440   240    
-832   128    
-336   512    
368    384    
16     -16    
240    -16    
-224   32     
-80    144    
144    112    
416    128    
-688   0      
608    224    
-416   96     
272    160    
-192   16     
32     80     
384    480    
288    -288   
-1776  80     
1952   -224   
-1168  112    
272    224    
240    160    
-464   656    
752    144    
-80    -96    
-176   80     
-32    32     
64     192    
192    144    
-96    80     
-128   144    
-48    -416   
400    -288   
-304   -1424  
144    -112   
96     32     
368    448    
208    64     
-432   192    
-32    -256   
304    -528   
96     -64    
-336   -112   
-272   -96    
320    192    
-240   64     
-192   304    
224    208    
0      -528   
-192   96     
656    160    
-432   -176   
992    -192   
-272   80     
192    -224   
-96    192    
-112   -16    
-96    160    
432    48     
-96    128    
-336   112    
-48    -96    
-16    112    
224    -336   
1872   5104   
-448   1776   
-816   -128   
1808   -640   
-752   32     
-528   -144   
352    272    
176    -192   
256    -48    
-1152  -144   
672    208    
-240   48     
208    -128   
272    128    
-240   -320   
32     256    
352    -896   
-128   16     
-144   -304   
560    512    
32     -272   
-192   -224   
-16    192    
-272   160    
-176   -64    
608    80     
-288   32     
-64    224    
464    80     
-176   -64    
224    80     
-144   -352   
0      -64    
-272   -320   
464    -240   
-544   -576   
288    -112   
-96    -16    
-208   -112   
304    -80    
-144   -160   
320    -128   
-320   -512   
-96    -208   
384    -192   
448    1200   
-576   -688   
-144   -512   
256    -1840  
-112   -96    
96     -64    
-64    192    
-48    -224   
-32    -160   
304    160    
-112   -448   
-32    -272   
-448   -1280  
240    -160   
496    -304   
-160   -80    
-176   -96    
128    96     
-64    -272   
384    -176   
64     -560   
-336   -336   
-288   -320   
304    -544   
128    48     
-32    272    
-64    96     
176    -128   
-16    -48    
96     -240   
-160   -320   
128    -416   
-32    -96    
208    -400   
64     576    
-288   -112   
1120   -352   
-1440  1088   
256    -736   
816    -2224  
32     192    
-176   -160   
48     896    
704    -656   
-272   176    
64     384    
-144   -192   
-96    400    
128    -192   
224    -288   
-368   16     
112    352    
-48    176    
64     224    
-96    -48    
48     -96    
672    80     
-1072  832    
704    -992   
288    576    
-224   544    
-368   -336   
144    -304   
224    -224   
176    -320   
-80    80     
-32    160    
-112   -224   
80     -32    
144    -176   
-224   272    
496    48     
-560   48     
-192   -224   
480    128    
-208   -1168  
-240   -144   
48     112    
208    -80    
208    -16    
144    -48    
-416   128    
208    -32    
32     -176   
-96    -176   
-224   -144   
-1552  -1024  
1296   112    
-400   -448   
-528   -432   
672    192    
368    -80    
-208   -384   
-352   -112   
-48    432    
160    480    
80     416    
-208   -400   
0      -48    
112    -192   
-240   672    
-64    -736   
304    240    
224    -976   
-320   1200   
144    -336   
64     288    
768    -624   
-2176  352    
2000   -640   
-896   336    
-144   -624   
176    -544   
400    272    
-528   1664   
48     1440   
128    704    
-352   624    
480    480    
64     320    
-160   -64    
-320   48     
288    -1936  
288    -256   
-288   -400   
-48    -352   
-96    -192   
-64    -176   
64     160    
-64    -480   
-528   -1120  
-208   -1696  
-768   -656   
416    112    
-736   384    
0      -48    
-16    16     
-320   -640   
80     -128   
368    -784   
-48    -144   
512    304    
-160   -832   
304    -1520  
-192   -432   
240    240    
-176   -48    
-368   240    
256    -288   
-336   480    
432    0      
-736   656    
560    -416   
224    496    
-224   -64    
-336   -224   
-144   2464   
576    448    
-1056  -400   
-272   -560   
608    -96    
672    1360   
-640   1664   
-752   -288   
944    -128   
576    -320   
-560   -48    
-432   -64    
336    -48    
288    112    
-176   -96    
-208   64     
-176   -64    
304    -208   
416    -1392  
-736   -1008  
64     96     
-176   416    
528    64     
288    0      
-672   -80    
672    384    
-688   -208   
-80    48     
320    -16    
-960   544    
208    656    
-256   400    
96     -272   
560    -32    
-112   -16    
-176   -208   
0      -240   
-704   64     
-224   224    
-16    0      
0      32     
-304   -288   
-320   -96    
80     80     
-144   -64    
-64    704    
-800   176    
96     -544   
-1040  -512   
16     -208   
-48    32     
176    992    
944    288    
-416   144    
0      64     
-32    48     
-64    -160   
336    -112   
-272   128    
-192   48     
-48    96     
-96    176    
-272   192    
-1232  -32    
288    48     
16     -96    
-256   144    
144    -176   
32     -656   
-512   -272   
80     208    
64     96     
-96    112    
32     0      
-352   -416   
608    -416   
-128   384    
-16    16     
144    240    
-416   224    
1136   704    
-3008  1328   
816    -512   
768    144    
-464   -192   
32     112    
80     -368   
-288   160    
-64    96     
32     -16    
-80    80     
-272   448    
224    0      
-176   -416   
16     -112   
-640   64     
-272   336    
208    -128   
-64    112    
128    -48    
-592   -608   
1088   -432   
-912   240    
-32    -96    
-176   256    
-224   96     
16     192    
32     224    
-80    -368   
-224   128    
-416   -16    
-80    128    
320    128    
528    80     
-880   208    
192    -64    
80     96     
160    144    
-240   64     
0      192    
96     0      
-96    80     
16     48     
-208   -48    
576    208    
-528   -96    
16     352    
-496   -176   
-304   -2736  
-112   -720   
336    -1152  
-160   -320   
576    16     
-272   -48    
-576   0      
832    464    
-240   32     
-336   272    
224    -96    
-272   128    
240    0      
64     144    
-688   -144   
-96    176    
336    80     
-432   144    
304    96     
-80    -32    
-176   -112   
256    16     
-160   272    
-400   0      
2016   -224   
-1168  -96    
208    336    
720    -80    
-480   176    
-208   -128   
576    96     
-32    272    
-432   -16    
96     160    
368    144    
-400   -32    
224    224    
-16    112    
-32    -48    
96     0      
-224   -160   
192    128    
-224   96     
304    432    
80     -112   
-752   160    
352    32     
192    -16    
-176   32     
208    912    
-960   320    
304    -208   
32     16     
-64    -80    
144    0      
-160   48     
240    -32    
208    192    
112    96     
-176   -144   
192    -432   
-288   256    
160    48     
-240   16     
432    128    
-16    80     
-336   -48    
208    144    
576    32     
0      176    
-368   32     
-592   -352   
416    2384   
368    352    
-1856  -176   
752    -240   
800    144    
-608   -64    
176    112    
-272   -112   
272    336    
-160   -176   
-48    160    
240    -48    
-224   112    
80     96     
272    48     
208    0      
-448   96     
512    176    
-560   -480   
-128   80     
352    224    
128    256    
-288   -224   
-176   112    
416    -160   
-400   -144   
-224   -96    
64     144    
-32    -272   
400    -272   
-576   -592   
64     -208   
240    -80    
160    64     
-480   -336   
192    -32    
208    976    
-528   512    
400    176    
176    304    
-112   144    
32     112    
224    80     
0      32     
16     -176   
176    688    
-48    128    
208    64     
16     1056   
144    224    
-144   -144   
-80    -544   
368    -224   
-272   -1104  
288    -560   
-112   -288   
-464   -1872  
-240   -1072  
352    1152   
-176   784    
224    16     
-48    -1072  
176    208    
-272   -96    
352    -112   
64     448    
-16    560    
-208   224    
-144   48     
240    496    
112    80     
-16    -176   
-16    16     
-32    240    
160    384    
-192   64     
176    -1232  
112    96     
-128   240    
-64    128    
384    -16    
-48    -688   
-224   -80    
-304   160    
240    -480   
112    192    
128    -48    
-192   192    
-208   240    
128    -256   
240    48     
48     -48    
32     96     
-112   224    
-32    256    
288    -16    
-192   368    
64     -48    
-64    96     
128    -16    
-352   -384   
912    -368   
-16    576    
-96    32     
-176   96     
-80    80     
80     -416   
432    -400   
208    -448   
-192   240    
-224   304    
352    -32    
144    -96    
-96    224    
-48    -48    
272    112    
-464   -160   
-32    -432   
288    -384   
0      80     
160    16     
128    -480   
192    -80    
-208   -560   
-96    224    
208    -1216  
320    -16    
-96    -64    
272    304    
16     384    
464    1568   
672    544    
-2512  -176   
1760   672    
288    384    
-800   688    
272    560    
624    -624   
224    -1408  
-112   1024   
128    0      
-128   144    
80     -192   
304    384    
-272   288    
32     304    
352    0      
-112   240    
432    1152   
-272   -320   
224    -176   
-560   240    
2192   -208   
-1248  256    
144    144    
352    -480   
-240   -320   
-368   -1424  
544    -1184  
-16    -1232  
-400   -848   
480    240    
32     160    
-272   464    
240    -336   
80     112    
-16    -32    
-144   -832   
-128   -512   
48     64     
304    -384   
80     176    
128    -80    
240    -304   
-288   80     
96     -256   
256    400    
784    16     
-272   -192   
416    -208   
-176   -384   
320    -240   
224    112    
-64    48     
64     -1392  
-48    -16    
-240   -32    
272    144    
-528   -464   
80     256    
432    -144   
-32    48     
48     48     
-448   -688   
384    -160   
80     -1136  
-368   -16    
144    144    
-176   48     
624    768    
1312   3328   
-1136  1008   
752    -272   
1424   -448   
-1056  0      
-384   272    
-160   -144   
1424   -672   
-224   -560   
64     -480   
-256   -64    
352    32     
352    -1312  
-352   -192   
96     48     
-96    -32    
144    -112   
272    0      
-608   -352   
304    -1136  
-272   -1200  
80     -368   
32     336    
-576   -80    
64     48     
608    -128   
-208   -48    
48     -720   
64     224    
304    -304   
-96    0      
0      -160   
-80    32     
144    512    
-352   -32    
-48    160    
16     -304   
368    224    
-96    0      
-528   32     
544    -272   
80     -80    
-48    -320   
32     48     
-576   -160   
592    336    
-224   352    
96     112    
-176   -288   
64     -560   
-144   -272   
64     -208   
224    576    
608    144    
-384   64     
-368   144    
208    -128   
-192   -32    
144    16     
-16    -1296  
64     32     
-64    -64    
288    48     
-128   80     
112    112    
48     128    
0      -256   
-400   -480   
96     -176   
-560   224    
400    -224   
-448   -64    
-16    -176   
288    112    
48     -400   
112    192    
-240   160    
272    -448   
16     16     
48     304    
-144   -128   
-608   -2448  
-608   944    
1520   -112   
-1008  144    
576    512    
592    192    
-864   -208   
-336   -16    
784    -496   
-96    64     
96     -48    
-304   -48    
-384   160    
432    -16    
-720   128    
192    -304   
112    -144   
-208   272    
352    -336   
-112   -272   
256    1168   
-640   -672   
-560   480    
1520   -256   
-480   48     
-752   80     
512    -144   
304    96     
-144   -96    
-16    -240   
-160   352    
208    64     
-64    112    
-240   -16    
-192   -144   
208    48     
-144   -336   
-448   80     
240    -192   
-544   176    
144    48     
-1040  112    
-96    48     
0      160    
240    32     
-400   112    
-80    -32    
80     0      
112    -32    
-784   -80    
336    1104   
480    -784   
-288   224    
-240   -480   
80     304    
-160   -128   
16     560    
-32    192    
-272   48     
-336   -96    
-336   -32    
80     0      
-80    -80    
48     -192   
-672   -160   
688    80     
-384   -288   
304    112    
320    160    
-192   128    
64     128    
-736   -176   
1056   -288   
-112   -320   
-928   -368   
288    32     
128    192    
-224   -176   
-416   -112   
464    -80    
-48    128    
-112   -96    
144    64     
-240   32     
-96    -32    
304    80     
-144   16     
-144   -192   
80     0      
-16    240    
-192   48     
-64    -160   
304    336    
-224   -384   
-272   0      
736    256    
-800   -80    
64     112    
784    48     
-688   160    
-160   -64    
160    32     
144    64     
-48    -272   
-240   -16    
-272   48     
192    -112   
-1136  0      
144    -128   
-336   -160   
240    16     
224    608    
-160   -224   
-496   160    
496    16     
144    384    
-160   208    
-160   -96    
-288   112    
1136   720    
624    32     
-2768  -224   
1424   -176   
576    368    
-80    -64    
-448   240    
512    752    
-528   912    
144    -64    
544    528    
-16    0      
-320   176    
0      96     
112    208    
-80    -80    
0      -160   
32     112    
-352   32     
-80    -256   
-640   -896   
-256   -448   
-144   16     
-320   64     
640    48     
-464   -144   
-240   32     
256    -304   
-464   -1056  
32     -1248  
-96    128    
64     240    
-112   144    
256    -16    
-48    384    
-352   288    
128    112    
-96    -160   
176    16     
160    -448   
-160   32     
128    704    
96     48     
112    -192   
496    1056   
-848   -576   
-96    -992   
304    -240   
-80    32     
160    592    
-240   -48    
240    256    
432    432    
-1264  848    
832    864    
0      1040   
-416   -544   
-16    -176   
-320   416    
112    -16    
208    128    
-256   48     
96     208    
-208   -144   
224    112    
-368   160    
-240   16     
480    -144   
-16    96     
-192   0      
208    -272   
144    240    
-48    48     
-80    64     
0      0      
-160   160    
-208   -96    
304    -112   
128    -352   
-16    -48    
64     160    
-16    96     
-400   -800   
400    -336   
-768   288    
416    -128   
256    96     
-176   -112   
464    -272   
144    -32    
-16    368    
-16    0      
192    -16    
-144   -16    
-80    112    
-16    304    
224    160    
-112   0      
0      32     
16     176    
48     192    
224    128    
-736   608    
864    -160   
-944   -48    
256    0      
256    112    
176    48     
-464   256    
320    224    
0      176    
-112   272    
48     -48    
208    144    
32     32     
-176   272    
192    272    
-80    272    
96     -64    
-288   368    
416    -816   
-240   -640   
-16    304    
96     80     
448    160    
-320   -240   
-272   112    
208    416    
-128   160    
-160   208    
608    -224   
368    976    
160    -80    
-1824  224    
1648   608    
752    1296   
-1808  816    
576    -224   
320    -128   
16     -928   
-144   -464   
96     48     
-112   240    
416    -80    
-32    -48    
80     -16    
-320   -96    
96     -32    
272    -32    
-48    -144   
-304   -16    
256    64     
-592   -1072  
944    -176   
272    -2048  
-384   1744   
2000   656    
-1072  560    
1136   272    
-800   128    
-144   -304   
528    160    
-64    -48    
-112   96     
-288   -416   
96     -32    
384    192    
-96    -608   
-176   -80    
48     -1504  
16     -48    
272    -240   
16     112    
-224   -528   
832    64     
-608   112    
176    -160   
448    336    
-1088  -192   
-368   -160   
240    208    
160    560    
-80    -32    
-16    -64    
-240   -176   
-224   -96    
352    -624   
480    -560   
64     624    
64     128    
-704   -64    
176    176    
64     32     
208    48     
32     176    
112    -336   
16     96     
224    -144   
64     144    
-208   -224   
112    -96    
480    -2448  
-2256  -928   
848    208    
176    80     
400    -304   
-80    192    
-624   -352   
272    736    
80     -160   
304    -112   
-256   -144   
304    32     
-176   -128   
16     48     
240    -144   
-80    176    
-48    -80    
128    -240   
368    464    
-400   448    
96     560    
416    -96    
-416   240    
-640   16     
528    112    
416    16     
-432   0      
400    -176   
-128   176    
208    64     
-80    -160   
112    48     
272    -32    
-304   0      
576    240    
-64    16     
160    96     
96     -192   
-112   176    
672    -704   
-480   176    
240    -64    
240    192    
-80    -32    
384    224    
-416   -64    
496    144    
-144   -1312  
-48    0      
240    -112   
32     48     
368    912    
-432   160    
-112   240    
976    -48    
-736   176    
48     48     
416    128    
16     -288   
192    192    
96     -112   
80     160    
-16    176    
32     -1184  
80     -80    
-16    -192   
64     896    
224    656    
-336   -1536  
256    -320   
0      -64    
-272   0      
432    256    
160    -176   
-128   112    
-176   -320   
320    -784   
32     336    
-272   160    
144    80     
-400   -1408  
2160   944    
-928   496    
-1104  -208   
656    256    
-448   -464   
-80    128    
880    -2176  
-448   -896   
-304   368    
352    -48    
256    -288   
16     400    
-160   -160   
48     -240   
288    272    
160    144    
-80    -176   
-288   16     
32     48     
320    0      
-208   864    
928    -928   
-672   208    
-16    -1600  
208    144    
192    -288   
144    544    
-32    -128   
-240   -384   
112    96     
352    48     
-304   0      
304    -144   
-256   48     
-32    -176   
240    64     
-320   176    
304    496    
336    -544   
-208   32     
-96    32     
176    48     
-160   48     
432    -160   
-416   224    
304    -128   
-288   96     
64     -480   
-192   96     
1456   -672   
-3888  416    
288    704    
1552   -32    
-960   -720   
-448   0      
480    176    
-96    304    
-96    560    
304    -48    
-80    -96    
-80    -80    
-48    48     
-32    -128   
208    32     
-704   -16    
-704   -240   
-80    -112   
224    -128   
16     -192   
-208   80     
368    -640   
-1536  848    
1472   304    
-480   752    
-432   192    
320    -144   
-144   128    
-256   80     
80     -144   
160    -80    
-96    -224   
384    -80    
-528   208    
336    -48    
-496   144    
304    -912   
-16    64     
-480   256    
512    32     
-80    -192   
-16    -96    
-304   -384   
128    176    
-336   112    
288    -208   
-144   1216   
-864   -144   
160    48     
-176   -576   
-352   32     
272    -192   
-176   48     
272    -160   
-160   -416   
-848   -384   
224    -128   
416    768    
-320   80     
-144   -368   
720    -272   
-256   128    
64     -160   
-16    512    
-160   -192   
224    256    
-512   16     
-64    -16    
-96    -64    
224    128    
-640   -1392  
976    -2064  
656    480    
-480   304    
-368   -48    
176    -288   
144    -560   
32     704    
-352   -1248  
-640   -1120  
288    -224   
-16    192    
-144   0      
-352   128    
-400   288    
320    608    
-320   160    
224    256    
-16    -416   
-288   -80    
160    272    
208    224    
-64    16     
-944   128    
768    -848   
-448   -80    
528    -528   
-352   -240   
192    144    
-336   48     
208    144    
192    80     
64     112    
0      -752   
96     -896   
-288   -672   
192    240    
224    464    
-288   432    
96     -880   
304    -560   
160    32     
-304   64     
-16    -224   
-192   -528   
112    880    
-352   -208   
-128   784    
-560   -880   
-160   -128   
-48    64     
384    160    
-1536  432    
1152   -288   
-144   -272   
256    576    
-176   240    
-160   -1600  
-128   -1360  
-272   144    
0      704    
80     -320   
144    528    
-592   240    
-64    -448   
-96    -464   
384    -96    
16     -320   
-464   160    
-16    -48    
-96    0      
16     128    
32     160    
16     -48    
176    208    
-192   288    
336    80     
-64    400    
-48    464    
64     -96    
-240   -272   
96     688    
-288   0      
192    -48    
112    112    
-176   -512   
-336   -400   
-80    -160   
48     -496   
-384   -528   
48     48     
-112   160    
-112   -96    
-64    -128   
48     -144   
-400   -256   
352    -64    
-80    -96    
-256   192    
176    176    
112    32     
-144   -736   
-656   -256   
496    384    
-752   208    
768    -32    
-16    -16    
-224   -288   
-560   -80    
80     640    
16     192    
320    -416   
-1632  -416   
-160   592    
160    -512   
160    752    
176    -272   
-400   512    
48     -384   
256    64     
144    -16    
-224   16     
-112   304    
-96    352    
0      224    
192    -48    
96     48     
-240   64     
32     16     
272    480    
-656   1040   
784    1104   
1696   80     
-1312  -160   
544    0      
-544   -144   
656    -192   
-96    -320   
-128   -288   
96     -320   
-48    -96    
-112   -32    
144    128    
-48    -64    
208    0      
-160   -32    
-176   -16    
96     -128   
-304   -208   
64     112    
0      80     
-64    160    
-176   704    
1456   -112   
-400   1024   
-208   -272   
112    -224   
272    288    
-208   272    
816    -80    
-432   144    
128    176    
224    16     
-128   48     
-48    192    
64     48     
-240   32     
336    -80    
-64    -112   
176    464    
-272   144    
-336   16     
48     -608   
80     48     
-176   80     
384    -240   
-192   48     
-288   -432   
-960   176    
-80    736    
784    272    
48     -144   
-208   128    
-496   -16    
192    208    
832    1344   
-592   752    
-544   48     
272    160    
304    -208   
-192   -96    
-176   0      
-256   160    
-64    -96    
160    -32    
0      144    
80     -160   
-672   304    
320    -48    
96     -32    
-544   976    
848    3616   
768    544    
-1520  304    
240    -288   
208    192    
272    96     
-464   80     
368    96     
-288   -128   
-608   256    
352    -32    
128    144    
112    -80    
-32    -1248  
112    176    
-256   128    
160    96     
304    96     
48     -64    
-1024  -80    
976    -80    
-352   96     
128    -80    
-32    192    
288    288    
-96    -112   
64     16     
32     -112   
-48    -848   
48     192    
-384   144    
512    224    
-464   -160   
64     16     
16     256    
496    160    
-704   32     
576    656    
-224   128    
-160   352    
336    -240   
-720   -32    
336    208    
128    96     
0      112    
96     -608   
416    528    
-32    288    
-384   -112   
352    -160   
-240   -96    
-176   -1024  
-720   -64    
480    272    
-32    48     
192    -32    
192    -96    
-112   80     
160    -368   
-16    16     
-64    -272   
-128   96     
192    144    
192    160    
-96    160    
-112   0      
64     -16    
480    256    
-384   32     
64     -64    
320    -144   
-192   176    
-48    128    
240    -624   
-144   -96    
-144   -672   
432    160    
-144   -560   
-16    112    
-48    -224   
-352   -944   
1360   -1616  
-1888  928    
880    -240   
304    128    
-736   -16    
160    -384   
304    208    
672    496    
-272   528    
-144   -688   
272    64     
144    -928   
-64    64     
32     944    
48     -80    
32     -80    
384    112    
-80    -64    
32     -144   
-16    160    
-48    880    
1008   -416   
-880   160    
48     608    
128    -16    
64     -128   
-48    -1120  
-32    -160   
112    160    
48     -64    
128    192    
-80    80     
80     -128   
-80    160    
208    48     
-128   -192   
16     -32    
32     -624   
272    -80    
80     -128   
48     272    
96     80     
-32    96     
96     0      
-352   96     
480    32     
-64    272    
-16    -176   
-32    -160   
1456   1392   
-912   -48    
-2000  -448   
2416   176    
-208   96     
-656   544    
16     144    
176    -240   
480    -80    
-80    176    
80     112    
-192   64     
64     -160   
160    -112   
304    -128   
-224   -416   
-112   -240   
208    160    
192    80     
-192   -64    
16     96     
-384   -560   
1232   -688   
-432   32     
304    96     
336    -272   
352    464    
-144   128    
-416   -464   
16     -288   
384    224    
464    -80    
-256   -624   
-192   -64    
400    288    
224    -48    
-352   128    
16     -720   
-336   -64    
256    256    
96     -144   
160    -16    
-176   -448   
-192   -256   
-1248  -16    
-160   -688   
96     -112   
976    1568   
672    1328   
-272   -384   
400    -240   
-192   -320   
240    -128   
96     416    
-160   -64    
-352   -624   
912    -304   
-96    576    
624    -416   
-224   224    
-128   384    
32     -96    
160    -208   
208    -240   
32     -832   
384    176    
-832   -576   
-32    16     
96     432    
544    320    
-48    48     
-848   2272   
896    -496   
-480   -544   
-448   1008   
1456   944    
-304   240    
-336   -208   
16     304    
384    -1056  
320    832    
-128   -704   
-368   224    
-112   32     
384    352    
32     -112   
128    -352   
-96    -64    
240    400    
304    704    
-256   448    
-352   -752   
64     32     
64     224    
64     -80    
-256   432    
128    -528   
416    -496   
16     768    
-128   384    
96     -656   
208    448    
-144   -384   
-80    -208   
-464   -736   
-144   224    
288    560    
224    208    
-672   -224   
-16    -448   
288    192    
32     -512   
176    -512   
-176   -976   
128    -384   
-240   48     
96     176    
-560   -1296  
-160   -320   
272    256    
224    416    
-352   1344   
-416   -384   
-912   -176   
816    -432   
-208   320    
-208   320    
-256   160    
416    -832   
0      368    
80     160    
-80    -32    
-240   112    
192    -48    
416    32     
-256   -176   
-48    -480   
176    -384   
-624   -256   
576    0      
48     208    
-176   0      
-112   80     
400    -288   
-144   272    
-160   1152   
-224   464    
80     992    
64     128    
-192   -480   
384    -512   
368    528    
-1904  752    
848    -848   
496    -720   
160    -512   
176    -688   
-480   128    
-64    320    
-688   672    
320    -736   
-592   256    
-304   -304   
-176   -48    
144    160    
224    -208   
-96    464    
112    320    
-304   112    
-208   -576   
128    32     
-112   -512   
-1152  1168   
880    -432   
-48    1008   
48     176    
-528   -880   
96     32     
-464   16     
-64    64     
96     -640   
-224   160    
32     -240   
288    176    
-208   -192   
-176   -272   
96     64     
112    544    
272    304    
-256   32     
-32    80     
-240   -16    
-96    144    
-128   224    
-32    304    
-64    240    
320    208    
-416   -288   
-16    112    
176    -112   
-704   -1280  
1840   -304   
-2016  416    
48     -96    
1104   192    
-1408  -128   
368    0      
432    -64    
-592   -688   
80     -80    
-640   -208   
0      192    
-128   -192   
304    416    
-352   -160   
-80    320    
144    -400   
-240   -48    
-128   -160   
192    16     
64     0      
-48    256    
-112   112    
1824   -80    
-1280  32     
416    80     
80     192    
-224   -96    
544    432    
-1024  176    
368    -144   
-224   112    
240    48     
-112   -32    
64     192    
208    80     
-464   -48    
80     -240   
-240   224    
480    144    
-64    -80    
96     80     
-688   -176   
1040   -112   
-624   64     
-32    -144   
416    112    
-352   272    
-192   -96    
688    80     
-16    80     
-704   176    
304    64     
-32    160    
-192   -96    
160    -576   
-256   96     
256    -512   
-496   -384   
-192   -496   
688    -80    
320    224    
-400   16     
-176   96     
208    48     
768    -208   
-704   176    
192    -112   
-624   112    
-384   -720   
560    -1728  
2176   -2864  
-1344  -160   
768    608    
-112   0      
-1120  80     
512    32     
496    176    
176    320    
-1008  144    
192    0      
272    64     
96     -16    
16     48     
-288   48     
32     144    
400    80     
-128   16     
16     112    
-832   -576   
416    32     
32     -32    
-240   320    
224    -128   
-496   80     
624    0      
-528   -240   
-272   144    
192    -80    
-160   224    
-144   48     
160    112    
-272   -48    
336    32     
-272   -96    
-288   112    
528    -192   
-736   -64    
208    -16    
0      176    
112    256    
-368   -32    
224    176    
-368   112    
144    336    
80     240    
272    -80    
-400   -144   
144    -16    
128    -96    
48     -176   
-192   -256   
448    -336   
-80    400    
64     -32    
192    -64    
-336   144    
128    176    
160    -368   
-368   -160   
-48    16     
112    64     
96     96     
-96    -64    
-16    -16    
-16    -224   
-144   -160   
272    -32    
-80    352    
304    784    
272    464    
-400   -16    
0      -240   
128    -144   
-16    96     
16     -176   
-16    288    
448    880    
-32    832    
-112   448    
48     320    
-768   -1152  
1552   -896   
-688   16     
-736   1024   
1552   304    
-384   -208   
-320   496    
-64    272    
560    304    
16     80     
-64    368    
-144   208    
-64    32     
320    -96    
-64    48     
16     144    
-176   -240   
96     16     
192    64     
-32    32     
240    -112   
-272   688    
416    336    
-208   384    
-384   496    
288    -960   
112    0      
-144   -96    
80     224    
16     240    
-48    -112   
32     -176   
96     -48    
-224   192    
224    272    
-112   -128   
-304   112    
-32    -112   
288    256    
-176   176    
-160   -784   
64     240    
-16    192    
96     -64    
32     64     
-240   128    
208    -112   
-80    416    
-160   -176   
-384   -32    
576    352    
1392   608    
-1488  -288   
560    -256   
208    -32    
32     -944   
848    816    
16     848    
112    496    
-304   -96    
352    128    
80     32     
-320   -112   
512    -176   
-208   -160   
-320   -320   
112    288    
128    736    
-160   704    
224    464    
416    -320   
-2160  64     
544    -1072  
1296   -368   
-752   96     
176    1280   
304    880    
-144   880    
160    272    
336    592    
80     32     
-256   96     
48     240    
320    -64    
-208   352    
96     -288   
160    128    
0      -32    
416    400    
0      -208   
-240   16     
-64    112    
-192   -512   
736    -1520  
-288   -832   
-48    -384   
-256   -288   
528    -368   
-240   864    
592    1088   
-464   -448   
-416   96     
432    96     
720    576    
-928   352    
-208   224    
-320   -672   
688    96     
80     288    
-48    688    
320    448    
-304   176    
32     -304   
32     -224   
-128   192    
96     -288   
16     64     
-224   32     
240    160    
-48    -832   
-928   -2112  
-1088  -1216  
1392   496    
-368   128    
592    32     
-288   656    
-368   -624   
384    -576   
368    560    
272    32     
-336   -480   
-176   -96    
416    -64    
256    48     
112    -208   
-16    640    
-48    336    
-144   16     
288    -496   
-16    192    
-32    336    
-48    -288   
320    288    
112    -336   
-32    208    
240    -464   
-608   -384   
-32    160    
576    1472   
80     192    
-64    -128   
-224   -352   
-288   -768   
592    -416   
-352   -1360  
128    -48    
128    -144   
80     -64    
368    752    
192    -848   
-80    80     
-224   336    
240    16     
16     32     
-48    272    
176    656    
112    800    
-320   -192   
176    -288   
224    -176   
-176   416    
272    624    
816    64     
-624   -608   
32     -752   
480    208    
-640   64     
-176   -528   
240    -1232  
-48    -656   
-80    -704   
64     272    
0      48     
32     96     
48     -48    
-416   -432   
-688   240    
240    192    
-160   64     
64     -16    
-96    -96    
-48    -576   
192    -80    
176    -176   
-96    160    
-16    -16    
96     320    
-32    -48    
-16    48     
-144   -320   
1184   1760   
-2512  1248   
1216   976    
-288   -160   
-400   -928   
368    -448   
-336   -1152  
160    -336   
256    -928   
448    464    
-528   160    
-16    144    
272    -224   
-144   -400   
-208   -352   
320    96     
-352   448    
272    880    
560    96     
-128   96     
-448   -480   
752    -912   
-432   320    
416    -224   
-224   304    
32     96     
-208   320    
80     -448   
272    -80    
-96    -240   
-112   -16    
112    256    
-16    16     
-672   0      
208    -208   
-384   32     
336    -80    
-272   96     
544    -432   
-592   64     
304    240    
32     208    
-16    128    
160    32     
-384   144    
448    -48    
96     -96    
-272   0      
112    -48    
0      64     
-2560  48     
1072   464    
1904   -784   
-1568  -576   
736    384    
400    -400   
-640   96     
-16    560    
688    -112   
-256   64     
-112   0      
-16    0      
-48    -112   
240    128    
208    -176   
-416   48     
112    -240   
192    160    
-176   -176   
-288   176    
256    -448   
-272   -608   
-896   560    
1552   -448   
-352   -80    
-784   32     
816    304    
16     -128   
-1024  208    
560    96     
-176   64     
32     -80    
80     96     
144    256    
-128   -32    
-480   -240   
736    272    
-704   128    
16     48     
176    112    
-48    -48    
-176   -224   
688    -64    
-960   -208   
736    -16    
80     -640   
-512   -576   
800    512    
-1536  -336   
-64    -272   
160    -80    
64     160    
-304   -208   
-512   224    
144    -208   
400    -192   
-528   0      
-288   -624   
448    -304   
160    160    
-192   80     
112    -144   
-256   224    
-272   -32    
128    32     
-64    592    
704    -32    
-496   224    
-384   -48    
848    1808   
-3168  -1040  
-736   800    
1536   288    
-1008  -80    
432    48     
400    96     
-560   -160   
-752   64     
944    -384   
416    -128   
-96    112    
-560   -160   
-48    176    
400    -48    
112    272    
-128   -240   
-624   192    
256    -176   
-496   -160   
928    -800   
-768   16     
352    -80    
-240   80     
-464   -192   
384    -128   
-368   32     
272    -96    
-80    -64    
144    352    
304    160    
-288   80     
160    32     
0      48     
224    176    
-304   128    
240    448    
-16    176    
528    256    
80     48     
-48    -48    
64     128    
-352   -144   
592    144    
-160   224    
-112   208    
64     80     
64     -48    
-160   128    
-208   176    
80     -32    
-32    192    
224    640    
-704   448    
272    -208   
-32    -400   
-224   96     
-96    240    
-128   -448   
-144   -448   
320    144    
64     112    
-16    80     
-64    64     
128    448    
-1248  -64    
160    -48    
-80    -256   
144    48     
-176   80     
256    -128   
-144   -352   
512    704    
-864   880    
448    16     
384    -288   
-64    224    
-320   640    
-336   -48    
352    -928   
-32    -208   
-112   384    
-752   1488   
1680   -416   
-960   768    
-160   672    
800    368    
-528   -1072  
16     -352   
-176   672    
256    -704   
-288   384    
128    80     
-176   -32    
16     192    
0      64     
16     -144   
-128   208    
-80    128    
-48    -80    
-16    -192   
-80    16     
-336   1072   
704    96     
-336   640    
-448   560    
272    0      
352    816    
-640   1344   
-208   128    
400    -80    
-96    176    
-128   -320   
64     592    
144    -352   
48     128    
160    32     
-352   32     
112    0      
144    720    
512    -112   
-368   -448   
-464   0      
80     -16    
304    336    
-192   -272   
-64    -64    
-16    -144   
96     -80    
16     128    
-16    192    
-624   -1008  
2144   -384   
304    880    
-1616  -848   
736    -1488  
-64    -224   
-176   -832   
624    464    
-240   112    
-432   -336   
96     192    
368    176    
0      128    
-64    288    
-112   -64    
144    256    
-80    112    
0      416    
-304   -224   
-240   128    
112    0      
-736   -560   
736    -800   
-416   16     
-256   -112   
608    -384   
-432   -656   
192    -320   
16     -1120  
-256   -448   
224    928    
192    1120   
0      224    
-208   -320   
224    -496   
-592   -336   
320    272    
-192   80     
544    320    
368    480    
-368   208    
32     256    
-112   -784   
-176   -144   
592    224    
192    -720   
-368   -336   
240    -96    
-1328  112    
64     144    
-96    -64    
-192   -464   
288    -160   
-160   -816   
464    -272   
-1168  592    
128    -672   
-720   -1200  
304    -208   
96     -208   
-576   32     
288    0      
-144   -128   
160    -464   
-32    112    
80     448    
112    208    
208    352    
0      -736   
-32    608    
-144   -352   
816    272    
672    -64    
-1072  -448   
544    -480   
480    112    
256    240    
192    992    
-624   1920   
192    -112   
416    -960   
-128   -192   
-304   416    
32     656    
336    32     
528    256    
-208   -48    
-48    304    
96     80     
544    -832   
-144   -1184  
-432   -272   
272    672    
208    -192   
-256   288    
-80    -64    
0      -480   
-384   -80    
176    -64    
-288   -112   
320    -128   
-48    208    
-112   208    
288    32     
-352   208    
208    560    
32     224    
176    144    
80     416    
112    640    
160    496    
48     80     
-16    352    
32     -224   
-368   -16    
192    -1872  
-16    192    
16     48     
-560   -752   
448    -192   
-16    -176   
-320   -528   
640    -336   
-464   176    
-304   224    
480    368    
-272   96     
368    -240   
-64    -480   
208    112    
80     -352   
-192   96     
208    -368   
112    -16    
-272   -560   
32     64     
32     224    
64     112    
-176   -320   
272    -336   
-48    272    
224    -432   
32     0      
-112   -512   
-16    240    
0      112    
192    544    
576    -576   
-416   96     
-144   -48    
272    32     
-640   336    
1232   -960   
-1056  336    
176    -272   
224    368    
464    -416   
-528   80     
128    64     
336    -256   
-144   -32    
176    208    
-176   -96    
-96    256    
96     -368   
224    -224   
496    304    
-384   256    
144    144    
-16    -656   
-64    -80    
736    0      
-1168  832    
768    -96    
-416   -48    
-80    -304   
256    -320   
-64    -224   
16     224    
64     -32    
208    256    
48     -80    
0      192    
-208   -16    
128    -64    
192    0      
-160   -144   
240    -80    
96     -240   
64     256    
288    -208   
-256   48     
224    -80    
-16    96     
144    -32    
-512   -2192  
544    208    
-160   -560   
-144   -832   
336    -48    
1232   752    
-960   1184   
192    448    
848    -320   
-560   96     
-256   -16    
432    -64    
-96    96     
128    -1184  
48     96     
96     -336   
288    224    
-416   -16    
176    -320   
240    -96    
-448   -416   
320    -128   
176    -672   
-448   192    
0      -1440  
208    0      
32     -464   
1200   672    
-1744  -224   
-48    48     
2000   -240   
-2176  400    
448    224    
-144   -144   
-1648  -304   
192    -176   
16     -80    
-16    -144   
64     48     
160    -784   
128    -192   
-416   -176   
160    -64    
112    96     
-368   128    
-176   -64    
272    64     
-784   -544   
704    16     
-96    -80    
-672   352    
848    -128   
144    -512   
112    -768   
-64    32     
288    -192   
-384   -1136  
112    -112   
-288   -64    
192    -160   
912    -192   
-256   -224   
48     128    
32     48     
-352   -144   
240    192    
-224   16     
-224   -80    
80     -32    
-32    -128   
-96    -48    
544    -528   
96     176    
-96    16     
48     368    
2608   5056   
-1456  1488   
-656   -1088  
2176   -368   
-960   -112   
-480   -208   
-160   -208   
736    -176   
-416   0      
-32    144    
640    -48    
-544   -384   
304    176    
176    -208   
-272   96     
-112   112    
224    32     
-80    16     
-64    -32    
416    1264   
336    704    
-896   -128   
192    -336   
-48    32     
-512   -224   
864    240    
-448   32     
-32    -160   
192    -352   
-48    -688   
-16    -240   
-192   -144   
-144   -144   
-64    -128   
80     -32    
160    224    
32     1008   
512    -112   
-544   -208   
192    -368   
48     112    
80     -496   
384    -224   
-256   -352   
-16    112    
-64    -96    
-336   192    
368    16     
-112   80     
272    736    
240    576    
-416   224    
144    -96    
-1312  -32    
320    -480   
-64    96     
112    48     
544    -1056  
-64    -1392  
-112   -736   
-96    -768   
-96    -496   
-32    -128   
80     512    
-128   48     
64     -352   
-96    -320   
224    256    
-96    0      
-240   -16    
96     320    
-576   224    
112    -112   
-128   32     
-240   -384   
-224   112    
-384   -112   
-64    -32    
-560   128    
0      -96    
-288   -16    
384    928    
-496   976    
384    -48    
-176   -608   
304    -64    
-416   -176   
-160   -64    
48     128    
-288   64     
-176   -192   
-208   -48    
-80    -208   
-464   16     
-112   -112   
176    0      
-64    80     
-224   80     
432    -96    
48     -16    
-272   192    
-224   -608   
-384   112    
432    240    
-448   320    
240    -32    
-224   -160   
-64    -192   
-96    -16    
208    96     
-208   64     
-208   64     
-336   48     
128    -16    
-16    0      
96     288    
0      32     
-48    64     
-320   96     
-32    160    
128    96     
-256   -144   
-160   -16    
-32    64     
176    48     
-464   176    
96     288    
-32    -112   
-96    16     
48     -32    
16     224    
-80    1216   
2832   -464   
-1520  -208   
-144   -1168  
896    -864   
-160   -288   
448    -1712  
-80    -688   
-336   -304   
-304   848    
352    224    
64     112    
0      -96    
-320   -320   
16     208    
192    304    
96     192    
256    -256   
-144   160    
80     256    
320    -736   
-1952  800    
1568   -320   
-448   640    
96     432    
576    304    
-1264  -1488  
-160   -864   
240    -1072  
-160   112    
144    -96    
-160   -64    
144    -208   
32     -288   
0      0      
176    16     
-112   720    
528    1152   
240    752    
-400   -16    
64     160    
-272   -256   
368    32     
-608   -176   
96     944    
-336   256    
688    1824   
-1312  1248   
-368   480    
736    -816   
-400   48     
144    192    
-240   176    
-320   -32    
-96    624    
1136   -432   
-416   624    
-592   656    
-64    -48    
672    736    
400    96     
-544   -192   
80     208    
352    160    
320    560    
-192   -48    
-752   64     
544    -224   
624    -640   
-992   -864   
1120   -32    
592    0      
-1296  -480   
432    192    
-464   -176   
304    32     
-80    304    
-464   -128   
-112   -32    
192    208    
-64    128    
-224   224    
-320   112    
240    -32    
176    64     
-112   -96    
32     240    
208    64     
48     2160   
784    1120   
-448   224    
-80    -528   
384    48     
32     -144   
-272   240    
176    -224   
-144   32     
-16    -384   
304    176    
-224   192    
64     208    
-80    48     
96     -48    
288    48     
-192   -48    
-96    208    
304    784    
48     560    
96     272    
144    -16    
-112   208    
448    640    
-432   256    
-272   128    
448    -80    
-176   -144   
-352   -160   
272    -192   
32     -80    
144    -16    
-192   -96    
400    80     
448    240    
-480   -336   
176    160    
16     80     
-208   -112   
224    48     
-96    -96    
-64    -64    
-192   256    
144    0      
192    176    
-160   208    
-192   -224   
480    -480   
-208   128    
-96    -256   
432    -400   
-336   352    
-112   -240   
240    176    
-144   256    
96     336    
-32    128    
-48    -2560  
-128   80     
64     128    
96     48     
48     16     
416    -1760  
-2272  1584   
1760   64     
-320   240    
160    -32    
64     -144   
-208   -240   
-288   128    
400    544    
80     -80    
-352   -1392  
-320   176    
160    48     
480    128    
-608   368    
128    -320   
144    320    
-144   176    
64     96     
80     160    
224    1216   
-896   -208   
-336   192    
1440   144    
-624   -96    
96     -336   
-352   368    
288    -32    
64     64     
288    112    
-480   240    
-96    -112   
-80    272    
592    -176   
-112   48     
-192   128    
144    192    
32     240    
-16    -208   
-192   208    
128    -192   
-16    128    
144    -608   
-48    160    
96     -32    
-496   192    
528    -32    
-16    208    
-16    -96    
-624   -16    
2240   -32    
-1056  -688   
-1136  784    
1280   -256   
-128   128    
-496   176    
384    368    
496    528    
48     -16    
-352   -160   
160    80     
272    144    
0      -80    
128    128    
80     -16    
-240   144    
320    80     
-96    16     
80     -112   
112    128    
0      64     
-32    416    
1472   -272   
-560   1344   
-176   -1600  
-400   288    
320    -384   
-448   48     
368    176    
-176   -96    
-192   144    
384    32     
-32    112    
-128   -384   
208    128    
-48    -224   
96     48     
-32    -496   
-224   -64    
64     16     
32     48     
288    480    
-464   -16    
-352   432    
784    64     
-512   -16    
192    -96    
-112   208    
96     -416   
736    48     
-272   -64    
112    592    
-208   240    
16     -144   
240    -48    
368    -128   
-224   80     
416    272    
-128   80     
224    96     
112    48     
0      -336   
-96    160    
80     -32    
-16    176    
208    -416   
-528   240    
304    -256   
0      16     
-400   -256   
-112   3856   
464    640    
-1920  -352   
368    -528   
2208   -1104  
-1008  -1280  
-496   160    
784    -96    
-80    16     
-80    160    
-208   -16    
368    48     
-768   176    
528    -96    
48     128    
48     96     
-304   176    
448    -400   
-208   1120   
-16    160    
96     -784   
-48    -480   
-256   -432   
848    48     
-512   -464   
32     -112   
256    -80    
-448   -400   
240    -272   
-176   224    
208    448    
-16    432    
-80    -480   
80     -256   
-272   0      
160    32     
-240   144    
144    -112   
304    0      
-192   -416   
208    -448   
64     -2096  
-368   -320   
-272   -752   
-256   -960   
320    -1136  
-144   -784   
448    -1264  
-96    416    
-208   480    
160    -272   
-1744  -864   
864    -304   
-576   -592   
-288   -336   
704    -240   
-16    -704   
352    880    
-304   128    
352    -1520  
80     176    
-160   368    
288    224    
-96    -192   
-416   -64    
240    -256   
-336   32     
-48    -128   
352    -112   
176    -48    
-32    16     
192    -560   
96     -16    
160    -2176  
-32    128    
64     16     
176    224    
32     -208   
336    -224   
-320   -80    
-32    -16    
-112   -704   
336    -384   
-1520  240    
-640   0      
400    -64    
192    -80    
-96    -256   
-96    -512   
-256   320    
16     32     
416    -48    
-128   -192   
-160   96     
112    -64    
176    144    
320    112    
-272   -32    
-736   192    
80     80     
-432   -688   
1136   -832   
-176   736    
-64    -640   
-96    96     
-144   -832   
432    432    
-416   1120   
432    -192   
64     144    
-112   -96    
-272   -160   
512    -224   
128    48     
-16    352    
-112   176    
-208   -48    
16     -112   
320    432    
-192   368    
-160   -288   
160    176    
272    112    
-16    -400   
-192   80     
32     32     
32     -64    
240    -16    
32     -112   
-432   16     
912    1216   
-1616  144    
-1072  -448   
1888   -688   
-784   -1520  
-16    -1600  
640    768    
-288   1504   
80     -1808  
112    -544   
-304   128    
-96    320    
192    208    
-64    352    
32     -96    
-256   64     
80     -352   
-96    16     
-192   -1280  
80     -832   
-320   -256   
-960   1280   
1872   176    
-1568  880    
880    -432   
-224   -176   
48     -96    
-80    128    
672    528    
-224   -352   
0      32     
-368   -256   
400    640    
-400   -256   
-64    16     
560    -176   
-624   192    
480    32     
-752   320    
-304   -32    
304    -32    
64     -112   
432    -144   
0      1600   
-800   -16    
-1056  -112   
752    16     
464    112    
-1360  352    
432    -240   
-112   -96    
32     32     
0      64     
-128   240    
144    -576   
400    -304   
-544   112    
592    576    
112    -144   
-224   -192   
-704   432    
208    -160   
96     160    
-224   -336   
-272   16     
224    592    
688    -112   
-320   48     
-432   -48    
640    1424   
1792   2224   
-2832  1328   
1184   -160   
912    -160   
-816   -144   
-80    -16    
176    -864   
592    -48    
240    -192   
-544   96     
416    112    
-272   32     
224    48     
16     -16    
-240   80     
-304   16     
304    64     
-784   -64    
576    592    
-592   512    
80     592    
464    -96    
-480   -96    
208    192    
96     -16    
-288   96     
192    32     
-16    112    
-224   -64    
240    224    
48     -48    
-128   32     
48     -160   
-128   -64    
-96    -144   
-256   0      
304    272    
48     816    
-32    144    
-128   112    
112    -112   
-480   32     
400    144    
16     160    
16     64     
-416   0      
-96    192    
432    240    
-368   96     
0      -16    
80     128    
336    1008   
-1168  128    
192    -272   
256    -80    
-192   -64    
-176   16     
176    32     
-32    -80    
144    -160   
-288   32     
176    -16    
-80    32     
-16    320    
16     -144   
-16    48     
96     192    
112    224    
32     -80    
-512   144    
368    -64    
0      -96    
-16    208    
80     176    
-160   288    
176    -176   
64     160    
0      240    
144    -112   
-240   128    
-624   -1072  
2096   320    
-656   352    
-368   -272   
-224   592    
-16    -144   
64     208    
96     96     
656    96     
-416   432    
-304   -416   
432    352    
0      96     
-176   16     
-16    -272   
160    320    
-128   -48    
96     32     
-48    320    
-224   -64    
-32    80     
912    672    
-144   176    
-416   -96    
96     32     
-576   -256   
800    320    
-16    208    
-336   -96    
-80    -208   
-64    144    
256    -128   
128    464    
-144   256    
-64    0      
-272   192    
304    112    
496    272    
-464   -112   
-144   112    
272    0      
224    176    
-96    -32    
128    192    
-16    272    
48     32     
-224   192    
400    -128   
-208   128    
48     -224   
-736   -1216  
-1136  -1136  
1216   -672   
-1248  -176   
-560   -48    
1520   144    
-176   -144   
-848   -928   
-240   -704   
160    -192   
208    192    
32     64     
0      112    
-128   128    
160    64     
-320   128    
240    -48    
-128   192    
0      -400   
-288   -144   
176    48     
-384   -672   
48     528    
688    -528   
-480   -272   
-64    176    
384    -320   
-576   288    
48     32     
112    -32    
224    112    
112    144    
-176   128    
-176   128    
144    -176   
32     -32    
272    160    
-416   -208   
256    -1168  
-64    288    
112    256    
-128   -80    
256    144    
624    160    
544    848    
-1040  320    
-144   -192   
400    192    
48     -16    
-112   -16    
160    -128   
720    1280   
-1120  320    
288    -1952  
464    64     
-464   592    
368    -208   
-272   32     
256    -32    
128    192    
96     64     
-272   16     
16     128    
32     -160   
224    64     
-384   -384   
288    -16    
96     256    
-432   -352   
560    1312   
2224   2752   
-2320  1968   
1312   -272   
1008   368    
-480   96     
-800   1008   
240    960    
560    16     
16     -272   
256    272    
-160   432    
-160   48     
480    -288   
16     -224   
-80    176    
-368   -112   
112    -32    
-128   144    
64     -48    
-80    -560   
-128   -368   
112    64     
80     320    
-48    752    
-384   528    
192    352    
304    -384   
-112   -992   
112    -1056  
-96    -96    
-176   -448   
224    112    
240    -160   
96     560    
-272   448    
112    336    
208    368    
144    272    
-208   -656   
-16    -320   
384    240    
-144   -96    
32     -32    
16     -400   
384    448    
-432   -112   
192    -1184  
144    -3120  
-304   -288   
0      320    
240    80     
528    352    
-1120  976    
560    1344   
96     1184   
-64    848    
224    272    
-48    -176   
-752   -1872  
640    -528   
304    864    
64     352    
-192   64     
-64    176    
320    -1472  
160    128    
-464   -240   
288    -800   
448    -48    
-320   16     
192    64     
-352   -128   
160    128    
0      -224   
80     128    
16     448    
464    272    
-480   -480   
96     0      
336    -64    
-64    48     
608    496    
-1024  800    
368    -192   
64     -288   
48     208    
-208   -144   
592    400    
-544   736    
96     128    
384    -592   
-144   112    
112    -880   
0      160    
-208   288    
192    80     
-64    -64    
-112   -1056  
0      -2128  
112    -80    
80     352    
-688   448    
960    112    
-864   -208   
144    80     
160    288    
128    752    
-208   32     
-208   -80    
48     448    
64     -32    
80     48     
16     304    
208    -368   
0      128    
-272   -144   
32     -64    
704    -1904  
-560   -816   
-256   32     
272    416    
336    208    
112    -144   
-112   -144   
-368   -288   
256    -112   
592    112    
-560   -80    
-640   -112   
944    -352   
368    1120   
400    -64    
-1120  736    
816    64     
624    -304   
-672   -128   
384    -736   
736    -480   
-496   -400   
144    -64    
256    -112   
-80    -144   
160    160    
16     -96    
-848   80     
-48    -336   
48     -48    
336    -288   
-256   -224   
208    -384   
-16    -32    
-288   -3008  
-160   -16    
1008   272    
-880   672    
-128   864    
432    -32    
-176   -304   
-224   -192   
-448   -160   
672    -400   
-480   192    
256    -192   
112    0      
112    -816   
16     -288   
-208   -1840  
272    320    
-16    -176   
-288   16     
32     -128   
112    80     
256    624    
-1120  -32    
320    48     
160    48     
-1568  -720   
-224   -416   
288    -688   
-720   -624   
224    96     
-112   -144   
176    448    
256    48     
-144   -320   
112    -128   
192    -640   
320    208    
-112   288    
-80    176    
32     -80    
-240   -64    
208    -240   
-672   96     
112    -128   
-32    48     
-176   -176   
0      112    
16     -1184  
-304   -944   
464    -2512  
432    -2880  
-288   896    
912    -96    
-784   -64    
-768   0      
64     -176   
912    240    
-208   -288   
-128   -368   
-96    288    
592    -336   
96     -96    
112    -528   
-176   -176   
320    80     
0      16     
-16    -48    
-336   64     
640    -400   
-432   -64    
560    144    
-112   400    
-1232  -176   
304    -96    
752    48     
-288   -160   
-496   -96    
208    96     
224    -16    
-336   0      
96     -96    
-192   128    
432    96     
16     368    
-480   48     
96     128    
448    -32    
-288   32     
416    -80    
-288   64     
128    -128   
112    64     
-192   -64    
-832   -192   
-144   -192   
96     -208   
-256   32     
-112   80     
0      48     
160    -160   
-16    -16    
464    -80    
448    -496   
-304   -672   
-192   -208   
-80    -432   
320    32     
-64    400    
-608   256    
320    160    
16     48     
-80    128    
-48    112    
-208   80     
272    -64    
48     32     
-240   192    
480    160    
-208   -32    
-176   176    
80     -48    
-16    -224   
-368   64     
128    32     
16     320    
80     -1088  
-304   -432   
-176   656    
-64    -208   
128    -256   
-1152  -816   
1712   -992   
-352   -32    
-864   -496   
1344   528    
-496   208    
-272   -16    
-16    -144   
208    -144   
-32    -144   
-192   384    
-32    -128   
-224   -80    
96     64     
-160   -240   
-128   416    
-112   -160   
208    144    
80     48     
-192   192    
688    1280   
-1440  304    
560    96     
448    -304   
-448   -128   
176    240    
-352   0      
112    -336   
32     96     
-48    32     
-416   240    
-144   208    
208    -32    
-112   -16    
-240   16     
-96    -96    
192    32     
112    144    
-32    256    
80     176    
-176   -16    
288    0      
-528   -64    
240    112    
-272   -16    
-304   256    
448    -128   
-256   160    
-128   64     
-560   -944   
1920   -400   
-448   320    
-224   384    
112    128    
-944   144    
672    -256   
352    512    
-496   48     
-144   256    
0      16     
240    176    
-832   -128   
-32    208    
16     -384   
-144   16     
96     -144   
-112   -176   
-304   -144   
368    48     
-48    96     
-336   -528   
1200   656    
-1072  256    
32     -1024  
-16    -208   
224    432    
-368   80     
256    240    
-160   80     
-240   16     
16     112    
-16    96     
192    80     
-80    160    
-64    96     
16     32     
176    144    
-96    320    
-16    368    
80     -16    
-48    48     
-224   -128   
-304   112    
-464   80     
64     496    
-80    208    
-384   -736   
256    112    
528    208    
-624   -752   
-320   224    
208    -64    
-336   -112   
-256   -432   
288    368    
-416   16     
-32    -464   
608    64     
-128   96     
-208   16     
32     192    
80     80     
192    96     
-16    64     
-448   -176   
688    -48    
368    144    
272    160    
-544   608    
-208   -144   
192    -2480  
-864   -768   
-32    -256   
-240   -16    
368    304    
-624   256    
-128   480    
672    1424   
0      448    
48     -144   
-64    -112   
-112   224    
32     208    
0      -336   
-208   64     
-144   128    
192    -640   
112    192    
-224   384    
-80    -80    
96     -80    
128    192    
144    336    
288    848    
-64    288    
0      96     
176    0      
-240   -16    
288    432    
-208   96     
-128   -48    
192    48     
-48    144    
-16    64     
176    48     
-176   160    
416    512    
-752   -864   
-16    -1296  
208    -288   
80     560    
-208   32     
-288   80     
272    48     
-128   -576   
192    -304   
-240   -320   
32     -112   
-128   240    
-16    -144   
0      192    
-448   144    
1104   -400   
0      512    
-16    1424   
160    1104   
128    -160   
-64    1648   
-80    -320   
-32    -304   
-16    -1920  
-16    64     
320    32     
-240   80     
-496   -32    
160    -176   
160    -144   
256    -224   
-160   96     
128    -128   
160    32     
176    272    
-192   240    
80     176    
64     -80    
-80    -1776  
-384   -144   
-80    32     
192    32     
224    64     
-80    160    
16     1488   
720    -272   
-288   -448   
448    432    
-224   240    
-304   560    
32     1040   
576    528    
-336   224    
-368   -32    
80     64     
176    80     
224    80     
64     352    
-192   176    
64     448    
304    272    
64     -480   
-48    64     
48     608    
-256   768    
304    -96    
304    -224   
-192   96     
-144   -480   
240    672    
48     -720   
64     -416   
-16    -48    
-80    352    
144    16     
96     -416   
-32    -576   
-32    560    
48     0      
80     -64    
16     128    
192    -128   
32     272    
192    96     
-192   64     
48     -1008  
-160   288    
592    0      
-320   16     
-160   -48    
144    176    
80     128    
416    576    
-1072  -544   
560    720    
-112   624    
-496   -96    
1776   320    
-976   -240   
-176   672    
608    -80    
16     272    
48     -528   
-80    160    
160    -16    
-16    176    
-80    -304   
16     160    
96     -160   
-64    -48    
96     704    
160    128    
0      176    
-96    -544   
-544   -800   
896    -784   
-272   128    
-496   -736   
832    512    
16     -192   
-64    -96    
-384   144    
128    208    
-80    -96    
336    288    
128    32     
-208   -416   
-192   176    
512    -320   
-48    128    
112    32     
-96    208    
272    -752   
48     32     
-32    112    
-368   -144   
576    -464   
-16    656    
-368   928    
-128   352    
96     -464   
864    32     
-48    448    
0      144    
208    128    
320    -416   
0      208    
-592   -96    
-320   -128   
528    -464   
304    -336   
-464   0      
128    -1312  
-32    -896   
80     -48    
400    -2416  
-320   160    
-304   96     
96     368    
1152   -32    
-544   192    
304    0      
800    768    
-2752  416    
1056   416    
-16    -704   
-1472  -432   
384    -272   
736    -32    
-480   144    
-96    -304   
320    368    
-640   -1248  
240    -32    
176    0      
-224   32     
-32    -448   
-48    240    
576    -544   
-304   80     
112    -304   
144    224    
144    -304   
-176   256    
496    -48    
-784   -240   
304    96     
352    -192   
-624   -48    
592    -1168  
-336   -32    
-64    112    
128    -64    
160    -80    
-96    -48    
16     -96    
240    -240   
-496   48     
752    -96    
-1520  -80    
176    -336   
176    -32    
208    -112   
-256   -64    
224    -320   
320    -192   
32     -1856  
-544   48     
288    -112   
-64    592    
720    272    
-320   -32    
-352   -144   
320    0      
224    656    
-128   -112   
-560   224    
480    192    
-272   176    
192    -400   
-192   -416   
-208   -1888  
192    -128   
240    -240   
144    96     
-304   32     
224    -160   
-240   -96    
0      -32    
256    32     
-64    -320   
-784   48     
240    48     
240    -128   
-64    -192   
48     192    
96     -880   
112    112    
-256   -32    
-112   544    
112    -32    
80     -336   
-288   96     
-368   -960   
688    -2160  
-288   384    
1008   -128   
-912   -32    
192    -80    
416    -192   
48     160    
0      -704   
-432   480    
336    -2160  
128    32     
208    128    
-224   160    
96     272    
288    240    
-96    -352   
48     16     
-192   16     
-96    160    
128    176    
-416   -1216  
960    -208   
-320   400    
-736   -240   
496    -976   
144    -192   
112    -144   
-256   224    
0      32     
368    -32    
-48    64     
-80    -80    
-352   0      
-16    -320   
256    -448   
224    -176   
80     176    
-96    -320   
-32    48     
-304   -16    
416    80     
-160   176    
-272   0      
48     -368   
16     -288   
160    -48    
-80    272    
-176   112    
-192   -576   
1552   1168   
-944   112    
-1760  -416   
2192   -160   
-624   -448   
-304   240    
288    80     
-688   -656   
160    -368   
-272   -224   
32     -32    
-128   -48    
80     80     
176    192    
-1024  -96    
-160   368    
-96    -160   
-224   112    
-400   -112   
32     64     
-64    -32    
-720   -720   
1200   -384   
-288   -496   
-1344  160    
784    464    
-624   -880   
384    -800   
192    144    
-448   240    
384    96     
-208   64     
224    208    
-16    -240   
-352   64     
80     -256   
-112   80     
-176   -336   
176    -384   
80     -192   
-16    -96    
-32    32     
-176   -80    
-720   -1360  
96     -848   
592    -160   
-688   -624   
512    0      
-48    96     
-416   96     
-96    112    
240    112    
16     16     
-128   -48    
368    352    
-1040  784    
-464   -96    
-144   176    
-144   128    
176    -48    
-320   -144   
176    32     
80     64     
96     -192   
-176   32     
176    480    
-560   336    
-384   -32    
240    -384   
64     128    
-528   -656   
1376   -32    
16     -144   
-400   288    
-640   400    
-96    48     
592    -720   
128    -1568  
-80    272    
-288   208    
-272   -224   
384    96     
16     96     
-48    688    
-272   96     
320    560    
336    -48    
-352   -496   
-160   -224   
-496   -448   
128    -560   
384    272    
-16    416    
-816   176    
752    -96    
336    368    
-288   240    
0      -1264  
-720   -288   
448    1024   
-112   320    
64     32     
32     -144   
-48    272    
-16    656    
96     -192   
-320   -672   
-240   688    
144    416    
-32    96     
304    224    
-240   -416   
32     416    
96     512    
-112   -64    
-64    -1472  
-704   320    
384    -128   
80     64     
288    -592   
-368   48     
272    688    
-1088  640    
448    -384   
304    144    
-608   -448   
-32    -144   
272    -112   
-864   -1056  
96     -1408  
176    -1024  
48     144    
-256   144    
0      320    
-352   -352   
-32    -464   
-64    -160   
176    560    
-240   288    
128    -608   
64     -80    
-256   656    
208    -48    
-160   64     
176    320    
96     704    
16     1888   
0      624    
-384   -512   
336    -384   
352    -16    
-672   912    
1136   -416   
-752   -80    
-224   -816   
-448   -1072  
-96    192    
-32    512    
208    -80    
64     448    
-432   -160   
-32    160    
-48    96     
384    96     
-144   288    
-112   0      
-96    -288   
144    -144   
224    320    
-128   112    
16     80     
-304   928    
384    384    
-336   400    
384    480    
-208   -464   
352    576    
-208   864    
64     432    
0      80     
-16    64     
176    16     
-48    16     
-144   -176   
304    192    
-80    336    
-320   752    
464    208    
144    -176   
-192   80     
224    80     
96     320    
-160   0      
-48    32     
16     16     
336    0      
-224   96     
32     96     
0      144    
96     256    
1264   1296   
-1008  1184   
-384   608    
1168   128    
-176   272    
-1280  -384   
576    -288   
208    -656   
-528   -80    
384    96     
16     64     
-240   144    
320    112    
-160   -112   
240    48     
-368   -16    
208    224    
-464   64     
320    304    
-64    -16    
-272   -64    
64     -464   
1184   160    
-784   -2416  
640    -192   
-128   16     
144    176    
64     0      
112    224    
464    160    
-256   160    
-80    48     
48     112    
-64    16     
256    80     
208    32     
-416   16     
160    320    
-368   -352   
448    -112   
-288   -144   
-96    160    
192    0      
-1248  208    
672    16     
1440   16     
-480   288    
-160   336    
-208   16     
128    112    
448    192    
288    -48    
-416   80     
-16    -528   
656    224    
-368   -112   
-160   400    
-64    448    
352    304    
608    -48    
80     480    
-576   192    
-576   416    
864    -160   
0      144    
0      704    
-480   -208   
272    688    
192    -256   
-576   32     
-544   576    
2800   -1840  
-1456  720    
896    -688   
16     304    
-192   608    
-480   -80    
512    368    
640    224    
-208   32     
-592   64     
336    128    
-48    32     
288    -48    
-256   64     
-32    32     
-512   160    
752    160    
-240   -32    
-704   -48    
880    176    
-512   176    
224    336    
-96    -144   
-512   -80    
928    128    
-624   96     
32     144    
288    -112   
336    80     
-336   0      
384    112    
-288   -576   
416    -144   
-32    0      
-240   96     
-48    176    
592    192    
-560   32     
144    -96    
0      48     
32     -64    
208    80     
-208   -112   
288    144    
-64    -224   
48     96     
32     80     
352    688    
-448   624    
288    448    
112    96     
-32    432    
480    32     
-464   -368   
576    64     
-352   -416   
48     240    
400    -32    
-96    -320   
-400   -256   
64     32     
208    -176   
64     384    
-80    192    
192    64     
64     80     
16     -304   
-112   -160   
144    -672   
-208   -320   
160    -528   
96     272    
-304   -16    
32     176    
256    224    
320    112    
-400   -304   
64     -432   
144    -160   
64     -672   
944    1376   
-2432  1344   
1440   -640   
416    -768   
-496   -368   
-368   -288   
-256   -1072  
160    -320   
144    -64    
96     -96    
-256   64     
-192   112    
320    416    
416    112    
-464   -240   
-336   -368   
304    -576   
160    -992   
80     -400   
-64    -272   
-224   -576   
672    -1104  
-192   720    
736    -1824  
-512   304    
416    -224   
-16    672    
272    -528   
-432   416    
112    -208   
144    -176   
-224   -80    
160    -16    
-192   -256   
80     32     
-144   -272   
336    48     
-128   -96    
-80    -2064  
-32    128    
208    112    
-16    -96    
320    -416   
64     176    
-48    -80    
-96    -304   
-128   112    
224    336    
-1184  -32    
-160   16     
592    -752   
-3040  -464   
1296   608    
176    -480   
-608   272    
272    -1568  
432    -64    
-1040  -1344  
288    -16    
208    880    
64     352    
-400   -368   
80     16     
-128   -32    
-48    -64    
-64    -48    
-112   -224   
112    -112   
192    -480   
-160   176    
-448   -1728  
1296   1136   
240    -352   
-1664  1104   
1328   1168   
-400   -576   
-752   -816   
736    128    
0      336    
-400   80     
-192   64     
240    -128   
144    -112   
-336   -896   
-64    -368   
32     -1056  
48     192    
576    -320   
-704   -1408  
-224   -896   
464    -160   
16     144    
-160   -256   
576    480    
-512   848    
160    -96    
672    624    
-928   608    
16     -192   
208    -208   
-16    400    
-96    80     
224    -1024  
208    -112   
-224   -96    
592    112    
-864   -1024  
-176   -64    
-64    320    
-400   240    
704    176    
-112   80     
-144   480    
-224   368    
48     -16    
384    -336   
-208   -32    
-160   256    
-80    544    
32     48     
1104   2576   
-1392  1040   
-224   -944   
1280   -544   
32     848    
-512   -112   
112    -560   
560    -496   
176    -496   
-96    -208   
-64    80     
304    16     
160    464    
-144   384    
-16    -224   
-304   48     
48     -176   
16     192    
-176   400    
64     624    
48     128    
80     -224   
-368   -368   
384    416    
96     -368   
-1040  80     
464    -16    
-320   1504   
160    1616   
-224   576    
-1568  -832   
192    32     
208    -272   
0      176    
-112   96     
96     176    
-272   -544   
480    -896   
0      -400   
-192   -320   
192    96     
-80    240    
272    304    
-688   -64    
0      -176   
80     224    
-144   -64    
64     -240   
-432   544    
96     16     
-64    -288   
-192   -1456  
-208   -256   
144    688    
-144   -848   
-2368  544    
1520   -512   
-224   -240   
-528   288    
96     -320   
416    96     
-128   -192   
-336   -416   
48     96     
-1232  592    
48     496    
-64    192    
-160   96     
16     320    
736    1232   
-704   624    
-128   304    
368    288    
64     496    
-160   48     
-272   -240   
208    -912   
-480   -416   
96     512    
-208   160    
16     128    
608    2256   
1376   304    
-1264  -336   
400    272    
-144   -96    
0      -288   
-224   -576   
-128   -864   
-144   -96    
160    320    
-208   -80    
32     368    
48     -48    
-448   -416   
384    96     
-592   224    
128    32     
80     -400   
-48    96     
-80    48     
32     1520   
640    -208   
-784   -160   
464    -64    
192    32     
-224   240    
128    112    
96     64     
-176   -208   
-256   64     
640    48     
-96    256    
-192   0      
-160   -48    
304    144    
144    0      
-96    16     
-368   -64    
160    -16    
144    80     
240    32     
-144   -32    
-176   112    
80     -128   
-176   -64    
-32    32     
160    144    
-32    128    
-352   -144   
2288   1280   
-2832  480    
-1856  64     
2384   32     
-256   16     
-608   0      
-256   224    
624    656    
-96    -16    
-80    128    
176    -80    
-304   112    
192    -64    
96     224    
-512   -208   
176    272    
160    48     
-64    176    
128    64     
-96    -16    
-32    -16    
432    736    
-1312  -208   
-144   192    
736    1008   
672    -64    
-784   624    
464    240    
-384   192    
-48    -160   
96     128    
288    -80    
64     144    
-368   96     
320    256    
-80    16     
-192   192    
-16    -224   
352    496    
192    320    
-928   192    
224    -176   
768    400    
352    -144   
-624   272    
304    32     
-832   176    
-528   -256   
-96    -192   
-128   608    
400    80     
96     -48    
160    0      
-480   416    
0      -240   
336    96     
896    272    
-464   256    
-384   -112   
16     -336   
-128   160    
-80    -32    
-48    144    
336    144    
-16    64     
-160   -144   
-16    64     
-288   144    
256    112    
-176   -688   
2064   -672   
-3136  -912   
752    80     
800    384    
-176   80     
-192   -176   
-48    112    
16     272    
96     -32    
-240   224    
384    -96    
-96    112    
-144   16     
192    128    
-256   -32    
256    48     
-16    64     
224    64     
-128   -176   
320    -672   
-64    -128   
96     48     
-224   144    
-544   -96    
128    -16    
464    160    
-16    128    
-176   -16    
112    -16    
304    -64    
-80    -96    
80     192    
32     336    
336    144    
-480   -176   
-32    -336   
256    -128   
160    80     
-192   80     
80     128    
224    224    
-64    240    
160    224    
192    32     
-208   400    
144    -672   
16     96     
128    16     
-304   -208   
48     80     
320    400    
160    720    
-736   416    
352    -400   
-496   -640   
304    -560   
-96    0      
-224   160    
96     0      
32     384    
96     -96    
576    816    
-544   272    
0      352    
480    48     
-48    0      
-144   -32    
-128   128    
208    208    
96     432    
-32    32     
-32    -64    
48     -96    
16     96     
48     464    
64     128    
288    576    
-176   32     
16     -272   
128    -48    
0      224    
-656   608    
928    -848   
-880   496    
208    816    
160    -672   
-160   96     
-112   -384   
96     -96    
-48    176    
224    -80    
112    -96    
-176   -32    
-16    176    
256    -64    
80     96     
-128   -272   
-64    784    
128    -96    
-16    224    
-96    -144   
-96    -464   
-32    -336   
272    -256   
-352   -624   
496    -208   
224    -16    
-192   608    
304    -288   
-256   -464   
32     -160   
160    384    
256    96     
-48    384    
-96    304    
0      -48    
288    176    
0      112    
-64    -128   
-128   0      
432    -224   
192    48     
96     -1184  
-224   -48    
-64    128    
144    240    
128    160    
-112   -64    
0      -176   
384    240    
-512   -848   
2272   -880   
-672   1312   
-352   -384   
1248   -192   
-400   96     
144    144    
352    -448   
-400   -208   
-32    976    
80     -576   
176    -112   
224    240    
64     -32    
-224   -80    
96     -32    
96     -400   
48     144    
-368   -608   
16     176    
304    -80    
-752   -112   
1584   -624   
-608   -224   
-240   112    
144    112    
32     480    
-320   608    
64     -304   
96     -464   
-192   -1360  
224    -1232  
-96    -1040  
-192   96     
480    1184   
-240   -384   
-256   80     
352    -192   
32     192    
96     144    
112    -528   
32     -64    
-128   -1392  
32     -272   
528    736    
448    176    
-608   -1296  
-208   -1024  
400    -464   
-464   112    
240    -464   
512    432    
-208   -144   
-368   -400   
-80    -288   
480    -608   
208    -112   
-48    288    
16     368    
-112   -128   
-48    -256   
-256   -96    
336    144    
16     544    
576    -256   
-128   -224   
-592   -1312  
-16    -416   
64     -32    
576    144    
-320   -1024  
400    -1808  
560    -192   
816    64     
-912   -720   
192    -1008  
96     -1056  
512    -704   
-336   -944   
-64    208    
336    928    
208    -272   
240    -160   
-240   -64    
-96    208    
288    112    
48     -16    
-256   -144   
-80    176    
608    272    
-48    128    
0      128    
-176   -448   
-512   160    
1104   1280   
272    32     
-400   -336   
-224   -112   
384    -512   
400    -192   
-560   -400   
240    32     
-16    -32    
96     64     
-368   16     
-32    -352   
32     -112   
160    -448   
-112   -48    
-80    -432   
256    -368   
128    -608   
-80    -64    
-16    -624   
-192   240    
240    -128   
-256   -320   
368    -528   
-160   -208   
-80    64     
128    144    
32     48     
-176   -640   
-560   -512   
96     224    
-176   16     
400    528    
544    -144   
-48    -1136  
-368   -16    
-48    144    
608    -128   
-192   -224   
-336   -272   
112    96     
64     -32    
96     -112   
224    -224   
-192   464    
-144   16     
160    -256   
304    -384   
-192   432    
192    -336   
-96    -16    
-224   16     
640    -288   
-208   48     
-304   192    
-16    16     
208    -64    
-784   -2384  
224    -432   
208    -160   
-640   -64    
1200   -48    
-720   144    
-32    240    
224    112    
-496   688    
224    -272   
-336   160    
-128   -64    
-48    -64    
208    -288   
80     256    
-160   -480   
-256   272    
112    80     
0      -128   
240    112    
752    592    
-1696  1024   
512    -480   
400    -96    
-560   -96    
608    128    
-736   432    
96     32     
-128   80     
608    -288   
-192   80     
-496   96     
208    320    
-80    48     
-160   320    
-272   -240   
0      112    
-752   -336   
272    48     
16     80     
-176   -16    
-96    16     
-176   -32    
32     160    
240    80     
-464   160    
512    0      
-368   48     
-176   -304   
144    192    
144    144    
384    1216   
816    272    
-560   -240   
-128   48     
352    144    
-176   320    
224    224    
-128   48     
48     32     
-384   96     
-48    -112   
-32    -32    
224    -64    
-112   -48    
48     112    
32     128    
-48    32     
-272   -80    
192    -48    
-160   -400   
816    128    
-1136  272    
1472   256    
-992   64     
-832   368    
1472   -80    
-160   528    
-416   -96    
-48    240    
208    0      
-192   -80    
-112   80     
-80    -160   
80     192    
64     32     
-192   80     
0      176    
-128   48     
-96    -64    
-32    80     
-544   480    
-944   144    
528    96     
-368   128    
-384   -224   
304    64     
-16    -592   
144    448    
-368   304    
-48    0      
272    128    
-224   48     
-208   -176   
0      -320   
64     208    
112    16     
-96    -80    
-864   240    
304    48     
-144   48     
112    32     
-16    80     
-240   64     
-64    -48    
256    -480   
-64    160    
208    64     
-352   80     
-992   -1152  
3104   -2304  
-448   1136   
-848   208    
-608   0      
544    320    
592    -80    
-656   -144   
-144   16     
32     112    
-336   16     
336    96     
-192   -80    
144    160    
-80    -96    
-64    -128   
16     96     
-288   -48    
-256   192    
-560   -1120  
-368   -1488  
80     -608   
-208   224    
304    416    
544    -16    
-672   -352   
32     208    
-208   32     
320    80     
240    128    
-224   208    
-96    528    
-128   112    
0      128    
288    112    
-400   272    
192    -160   
240    112    
-96    176    
-272   176    
240    160    
-32    0      
-32    144    
-112   32     
-128   256    
624    416    
-368   464    
-320   368    
384    496    
128    272    
-48    960    
-48    736    
-64    1344   
1296   -400   
-496   -368   
-384   -208   
128    -624   
16     -480   
112    -432   
-112   208    
96     1072   
-256   -32    
-160   -752   
208    -144   
48     -144   
80     80     
-128   208    
192    -288   
128    160    
32     -16    
32     368    
-32    48     
0      144    
272    0      
176    288    
-400   64     
80     -64    
304    -112   
-688   -592   
352    -256   
368    -48    
-160   336    
16     1040   
496    256    
-672   -192   
64     112    
-16    64     
-32    96     
144    80     
112    16     
-112   -240   
32     0      
-48    240    
208    112    
-80    160    
-144   112    
256    112    
0      32     
192    48     
-144   0      
-192   288    
-320   -384   
1200   -672   
-496   512    
528    -192   
-704   432    
80     16     
96     -192   
224    976    
432    352    
-784   608    
-96    -224   
832    112    
0      32     
-224   80     
32     224    
-16    32     
16     112    
144    -256   
64     304    
-32    32     
16     368    
224    192    
64     96     
-144   112    
-32    -384   
-192   -144   
224    -160   
-192   400    
496    592    
-192   768    
1584   1184   
-1856  512    
-1520  -480   
2144   -576   
-800   -816   
-720   -736   
112    -448   
-272   -2464  
720    -1072  
144    672    
-272   -160   
-192   448    
160    -432   
336    288    
-224   -272   
-352   -16    
96     -272   
272    -768   
16     752    
-192   224    
-208   -1056  
1344   960    
-416   -464   
-1008  400    
1200   480    
-384   1136   
-720   1456   
512    960    
608    -736   
-896   -640   
432    -64    
160    112    
-272   32     
368    192    
144    16     
-208   -16    
272    32     
-400   -288   
432    -64    
160    -208   
-384   256    
144    144    
352    400    
-16    256    
-992   -368   
800    -672   
176    -48    
128    -112   
240    624    
128    -176   
-752   96     
96     -48    
16     -688   
576    -192   
-256   -1104  
-192   -688   
768    -1232  
-128   -256   
752    -64    
-432   128    
-64    -80    
240    144    
208    -80    
-368   160    
-16    80     
32     -16    
512    48     
368    -112   
80     1024   
-784   608    
-272   -2416  
-256   -2720  
-112   -32    
-224   304    
976    -128   
-16    -864   
-624   128    
592    0      
128    -128   
-208   -416   
144    -48    
-112   48     
96     368    
576    -80    
-96    -496   
-384   32     
400    -224   
48     48     
96     -1040  
-896   -1536  
272    -480   
48     192    
272    240    
-112   -720   
-400   80     
336    240    
-512   128    
352    80     
-144   224    
96     0      
288    160    
-480   -32    
400    -16    
64     400    
128    208    
0      96     
-416   160    
224    288    
144    32     
-256   64     
-48    -80    
208    176    
0      -304   
304    80     
304    -16    
-96    96     
-208   -240   
304    288    
48     -64    
48     -2928  
-160   80     
-48    -352   
480    -512   
-64    496    
-384   -1376  
256    -192   
-240   48     
0      -96    
16     -400   
-16    -240   
-16    256    
160    -416   
160    -752   
-16    48     
-176   96     
-192   -96    
144    160    
256    -272   
-304   -528   
16     -208   
32     176    
224    -1312  
-160   -48    
96     64     
48     -48    
-96    -320   
144    -96    
192    -128   
-48    16     
0      128    
-144   208    
-432   -2032  
-1696  352    
1344   128    
-432   -608   
-784   320    
688    -240   
256    224    
160    32     
-224   -368   
144    256    
224    -112   
48     96     
-96    32     
-16    -800   
48     32     
144    144    
-208   -144   
112    48     
112    32     
-16    176    
432    896    
960    -304   
-1376  -1840  
544    48     
384    32     
-592   128    
416    -64    
128    336    
-192   -176   
-224   96     
416    -128   
-96    192    
-592   16     
240    -160   
-416   -32    
320    16     
160    -80    
80     -208   
-16    -144   
0      -928   
112    96     
-16    -16    
336    144    
-400   0      
544    144    
-448   -144   
192    144    
112    16     
-192   -176   
-1184  784    
1056   544    
-400   304    
-96    -496   
480    192    
0      -112   
-224   16     
144    384    
80     -128   
-48    176    
48     0      
16     48     
-48    -144   
-144   -240   
208    48     
-176   -80    
-64    176    
-32    -192   
224    -592   
16     -112   
-16    -304   
-368   -528   
80     624    
720    -240   
-960   32     
672    96     
112    -144   
-416   -96    
464    -368   
-656   208    
352    -32    
144    -320   
-176   -16    
-112   -592   
336    176    
-144   -336   
160    32     
-160   320    
176    -96    
64     -384   
-144   -48    
16     336    
96     112    
-432   -160   
864    -16    
64     48     
-48    32     
-672   352    
528    -320   
64     96     
-48    -48    
304    48     
-128   -112   
-112   32     
480    160    
80     80     
-272   -64    
-496   -288   
768    32     
-176   -112   
-688   48     
576    -48    
32     48     
96     -48    
-336   224    
-672   -240   
-624   16     
-176   112    
-1040  -256   
784    160    
560    224    
-2896  -816   
2144   -208   
640    32     
-1040  -16    
0      544    
-480   144    
320    112    
-32    -256   
-272   240    
-560   -304   
-272   240    
480    -48    
-176   160    
-528   128    
-320   112    
208    48     
-48    64     
416    624    
-384   1008   
288    400    
-80    -480   
-384   -464   
224    -48    
-112   352    
128    224    
224    240    
-32    656    
-224   1008   
-112   32     
256    -432   
80     544    
-384   368    
-272   -240   
-160   -48    
-16    -96    
64     384    
480    784    
-208   656    
272    48     
-32    16     
-112   -48    
-80    -144   
112    -368   
320    160    
-320   672    
368    1344   
-368   400    
-400   -1248  
-928   -128   
-160   480    
-208   -896   
-224   528    
736    -112   
-944   -368   
448    -288   
-80    -112   
16     -32    
160    96     
-96    240    
-160   288    
-48    -160   
-96    0      
-64    80     
-224   -400   
16     -400   
432    -368   
576    160    
-400   448    
80     -32    
-144   112    
304    -112   
-96    240    
96     32     
-48    192    
32     -112   
32     96     
-32    304    
-16    160    
-352   -112   
256    96     
176    -688   
-1120  400    
464    32     
-240   240    
224    48     
-224   -288   
-16    -320   
-32    304    
-80    128    
-80    -64    
272    -80    
-368   0      
16     272    
-368   -16    
464    -160   
-672   -16    
-96    368    
336    -32    
160    112    
-16    224    
-352   1040   
848    -112   
-896   32     
240    -144   
128    -144   
32     16     
-192   -496   
16     128    
-176   -32    
-192   224    
176    272    
192    0      
-176   -208   
112    -96    
160    400    
-128   -128   
-304   688    
-96    336    
32     80     
80     0      
-32    -32    
-208   48     
128    -272   
16     -416   
80     144    
-496   -32    
-112   -96    
288    352    
208    640    
1440   1520   
-1776  976    
-1104  -304   
1552   -688   
-416   -400   
-832   336    
-176   48     
96     1984   
1056   -144   
-176   -928   
-560   -1264  
112    -464   
192    -352   
32     48     
160    0      
-496   144    
192    48     
240    -336   
-160   -416   
-272   -560   
-112   64     
256    1088   
2128   320    
-1472  848    
768    912    
304    -368   
-32    -1072  
-480   -992   
576    -192   
-48    64     
-512   144    
480    -96    
128    272    
-112   -16    
-320   -32    
544    64     
-64    160    
-48    368    
-352   448    
-16    -48    
112    -112   
176    -192   
192    -48    
592    144    
80     1040   
-720   592    
-16    -176   
176    288    
-32    16     
256    384    
-1120  352    
304    0      
416    -176   
-96    -16    
-288   96     
-240   448    
1152   832    
-720   848    
-32    -96    
32     144    
-400   48     
240    16     
720    64     
-656   -48    
256    32     
-176   240    
384    -16    
80     48     
-320   96     
-288   448    
1184   -3424  
-1824  -1696  
704    656    
64     416    
688    80     
-240   144    
-448   -304   
272    448    
416    -128   
16     176    
112    -208   
-144   144    
-112   0      
688    48     
-48    144    
-304   64     
-144   192    
256    -32    
64     304    
160    -560   
-528   368    
704    -144   
-480   176    
352    -144   
16     -32    
368    -416   
-160   -32    
-192   -288   
208    -560   
-224   48     
496    -2608  
-224   160    
64     48     
96     320    
224    304    
144    64     
-128   112    
144    -48    
-80    304    
-336   32     
288    80     
368    128    
-496   112    
64     32     
-288   64     
160    -64    
352    48     
-96    336    
16     240    
-80    224    
416    96     
-160   -304   
288    -416   
-320   224    
736    784    
560    32     
-912   -96    
592    -160   
-80    -240   
352    -176   
-144   -688   
-208   96     
288    -32    
0      16     
304    -288   
-272   -16    
192    -144   
-176   176    
64     -352   
208    48     
-64    0      
-192   -128   
96     128    
48     -96    
272    288    
-208   -512   
32     208    
0      -1104  
32     320    
256    -208   
-320   0      
832    2368   
2032   -160   
-1936  496    
560    32     
-240   -160   
736    96     
-160   -48    
-32    -512   
-80    128    
-80    192    
352    -80    
-128   -176   
48     0      
-32    -1104  
480    -48    
-400   368    
128    16     
80     0      
-144   288    
64     -16    
-352   -1456  
320    160    
272    -304   
-896   240    
864    -64    
-80    32     
-288   -192   
80     -176   
64     -144   
304    224    
128    64     
-352   -128   
-16    96     
464    400    
-144   320    
-80    -48    
288    288    
-496   -144   
576    128    
-304   -160   
80     112    
64     -112   
-32    -48    
16     16     
144    112    
-304   160    
384    96     
0      80     
-176   -160   
-560   -256   
2176   -96    
-2496  320    
-512   -208   
1920   304    
-1168  -608   
-224   -32    
592    -368   
-496   -160   
144    -272   
144    304    
-112   112    
-64    -112   
-80    -32    
496    -176   
-560   -288   
368    16     
-160   -96    
-16    -144   
32     112    
-112   -272   
32     128    
560    -448   
-1296  -368   
1120   -336   
320    -656   
-400   304    
-16    -352   
528    -384   
-80    288    
-80    -128   
-16    -64    
-240   -448   
160    -176   
192    -400   
0      192    
208    -48    
-64    288    
-608   -304   
272    -112   
272    -496   
-240   240    
-592   -224   
1296   -656   
-512   256    
-304   -288   
672    -128   
224    -288   
-304   -128   
-192   48     
160    112    
160    -192   
16     16     
-64    -176   
0      -64    
64     96     
-464   448    
688    -48    
64     -240   
-208   32     
288    -448   
-208   144    
160    -16    
16     -112   
-80    -320   
-32    -368   
512    -288   
464    112    
-208   -224   
80     448    
128    96     
-128   3648   
192    80     
-1568  -848   
-688   -480   
1520   160    
-704   -672   
0      -1024  
624    -976   
-96    -496   
-320   240    
160    -528   
192    -384   
-144   -800   
0      -64    
0      176    
32     176    
224    304    
720    32     
-496   240    
-128   768    
0      640    
208    -16    
-544   -208   
320    -64    
-160   -592   
112    -720   
-160   -304   
-208   -1248  
0      464    
224    512    
32     16     
-176   -544   
-256   -80    
144    224    
112    -96    
-96    -544   
-224   -208   
64     432    
0      544    
160    224    
-16    -288   
-272   -16    
-48    -1232  
-112   288    
528    1184   
96     1536   
-320   144    
336    720    
-336   -304   
144    480    
-480   -416   
592    1152   
-144   896    
0      1008   
256    704    
384    -368   
368    352    
-576   -1056  
128    -560   
-144   400    
144    -304   
-224   176    
-240   16     
-112   80     
224    32     
-256   -112   
-48    80     
176    544    
0      240    
256    -80    
-144   16     
192    32     
-96    -128   
160    -112   
-64    64     
224    -176   
-480   -224   
464    -704   
432    -32    
-128   128    
0      32     
-160   736    
480    -16    
64     -336   
-272   352    
-560   -288   
32     176    
112    -496   
-832   128    
-144   160    
176    64     
272    96     
-400   224    
-144   16     
112    144    
0      96     
96     160    
-48    -96    
128    -640   
0      -16    
96     688    
32     -128   
-272   -240   
656    16     
-64    208    
-416   160    
-208   176    
16     -464   
304    -528   
-416   -304   
-256   112    
64     32     
0      48     
80     -144   
48     32     
-144   448    
-320   -624   
144    -720   
320    1008   
480    32     
-800   -400   
-464   304    
480    64     
80     32     
-704   336    
-400   -16    
368    -288   
192    -224   
176    144    
-480   448    
-128   -1008  
-1424  352    
1648   352    
-128   720    
-1488  848    
1296   656    
368    -144   
-1568  976    
656    832    
112    48     
-80    288    
-1088  -128   
-128   128    
48     48     
352    272    
-64    64     
-192   -80    
-64    -304   
128    -96    
-32    80     
-448   -576   
1296   720    
-720   -96    
-368   128    
1024   -16    
-832   80     
0      400    
656    32     
-80    -96    
48     272    
-208   16     
16     48     
48     -80    
-256   48     
480    80     
-48    144    
-336   32     
96     128    
464    -48    
-368   48     
-176   192    
48     384    
-512   464    
-192   -432   
64     192    
-16    400    
-128   288    
304    544    
-832   368    
-48    -16    
496    -64    
80     -64    
-192   304    
16     320    
-176   80     
-144   128    
-80    -64    
128    240    
-400   -528   
-96    -352   
160    240    
32     96     
128    64     
-112   32     
-288   16     
176    816    
1168   -32    
-880   -16    
96     320    
-736   608    
-544   480    
288    528    
-1072  800    
-128   -336   
512    384    
144    -48    
-688   304    
288    16     
-144   256    
-64    -160   
-192   240    
-96    -304   
-96    288    
0      0      
-272   -16    
-96    -64    
64     -48    
112    80     
256    464    
-736   0      
176    656    
464    -208   
-656   80     
544    32     
352    112    
-176   -176   
-80    192    
688    -112   
-640   240    
416    -112   
-176   96     
240    0      
-96    160    
480    368    
-720   112    
272    400    
128    -160   
-192   64     
-16    96     
16     224    
96     -112   
-80    128    
-272   -320   
128    -96    
448    -48    
208    64     
-400   176    
208    224    
32     112    
144    64     
-64    192    
-112   -448   
-912   240    
832    32     
-224   448    
-48    -112   
96     80     
0      176    
288    272    
0      80     
160    192    
-416   -224   
160    48     
496    480    
-176   416    
-432   -384   
496    -688   
-112   192    
-176   -48    
336    -384   
-432   192    
80     240    
304    -48    
-32    -16    
-256   112    
256    384    
-224   64     
256    -416   
-176   112    
-16    384    
464    1776   
-544   -2016  
-1216  224    
1568   -736   
-944   -128   
112    -48    
0      320    
624    800    
144    16     
-512   -240   
160    304    
48     80     
320    48     
-160   48     
-48    -960   
48     544    
160    288    
-304   -208   
144    -384   
128    160    
-208   176    
912    896    
-320   48     
-640   -128   
448    16     
-128   -352   
96     80     
224    -48    
192    112    
-384   416    
-112   176    
368    272    
112    -96    
-208   -16    
-96    -16    
272    64     
32     112    
128    240    
64     128    
-160   64     
128    -160   
80     176    
32     -848   
-48    160    
-32    16     
160    112    
-32    224    
-208   176    
256    144    
160    32     
-1264  -496   
752    80     
144    48     
-560   -80    
960    464    
-32    -448   
-1088  -112   
704    -976   
128    -80    
-176   16     
-128   160    
208    48     
-304   80     
64     -80    
272    304    
-304   -240   
160    16     
352    -48    
-336   -448   
-160   80     
192    -64    
-608   -576   
1488   -528   
-416   -368   
-1616  -496   
944    224    
-240   -672   
-64    0      
160    128    
-320   256    
672    16     
64     96     
-240   32     
176    96     
112    272    
-208   0      
192    96     
-288   -224   
16     0      
96     -1008  
352    -272   
80     -48    
576    864    
-720   192    
784    -240   
-720   160    
-368   -48    
1312   -544   
-272   160    
-368   336    
480    -288   
80     80     
208    -304   
48     288    
144    -1152  
-272   -304   
432    720    
-352   320    
-256   -624   
912    -80    
224    160    
64     0      
-336   112    
288    160    
320    -96    
272    -496   
-448   -288   
-80    -688   
768    -368   
-208   -368   
-48    304    
752    -2368  
400    -80    
576    752    
-672   1168   
240    992    
496    496    
208    -768   
-384   -1040  
-304   -288   
480    480    
304    -112   
160    144    
-128   -16    
-16    48     
576    512    
-208   -544   
-288   -96    
304    400    
320    432    
-192   -48    
-160   -784   
208    -64    
320    0      
-336   64     
288    -800   
-48    -560   
176    464    
160    736    
-64    -1152  
176    -272   
112    608    
-256   -1536  
160    -64    
48     -32    
272    1120   
-16    496    
256    -784   
320    992    
64     160    
144    -432   
-592   -1200  
288    -336   
320    -352   
32     -512   
64     256    
-304   336    
224    -1216  
304    416    
-160   -272   
-224   96     
-368   -928   
736    -1344  
-32    -1376  
-272   -1152  
160    -160   
-16    -2800  
304    768    
-160   304    
96     416    
64     -400   
-176   -48    
144    -144   
64     64     
-96    0      
-48    288    
-512   336    
256    -128   
0      -1424  
-64    64     
-192   384    
-256   64     
304    -208   
-176   -512   
32     -384   
-368   -512   
160    -432   
288    -400   
560    -688   
-784   400    
-32    160    
-608   1024   
992    -544   
-512   -960   
128    -1024  
-272   -560   
208    960    
144    816    
96     -912   
0      -608   
0      -80    
176    112    
192    -144   
-32    -64    
-144   32     
-80    -240   
80     -336   
304    -272   
64     -64    
-224   32     
-272   32     
512    240    
256    -368   
-976   64     
224    1216   
512    -688   
-416   -272   
304    -448   
112    176    
-192   240    
-32    -336   
160    32     
96     -160   
-352   -64    
0      -80    
-1008  -32    
320    -144   
-144   48     
112    -512   
192    528    
-64    -560   
-192   160    
-48    224    
336    -64    
-32    320    
192    -128   
-480   16     
496    -16    
-688   -80    
-384   -240   
1568   480    
-624   192    
-1600  -16    
1904   32     
-928   -288   
-144   -688   
32     -496   
-128   64     
448    -96    
-80    256    
0      -176   
256    16     
-16    -192   
-80    16     
-64    0      
-16    64     
0      -192   
240    288    
112    -320   
-96    96     
16     -528   
-288   -848   
112    224    
400    -400   
-960   -96    
784    -16    
-224   -96    
-160   16     
-208   -224   
-336   32     
-816   -112   
128    -272   
-192   64     
176    -176   
-176   144    
560    -160   
-768   208    
288    80     
-64    32     
-256   -16    
336    -80    
-80    -48    
528    192    
-112   48     
272    -128   
32     96     
-80    -272   
-96    176    
-832   -48    
416    -80    
272    -16    
-240   -192   
-144   176    
-272   128    
-48    160    
528    160    
-384   -560   
-352   -16    
224    384    
-192   48     
640    224    
48     48     
-528   240    
-176   -48    
224    0      
-144   -288   
192    -112   
-160   144    
-608   -16    
1136   1136   
-2320  -2688  
-1296  240    
592    -272   
-1040  128    
928    0      
-256   368    
-240   -112   
64     128    
-272   -240   
208    -48    
48     32     
208    -160   
-480   80     
48     80     
-288   -64    
256    16     
96     64     
-480   -16    
-96    -48    
784    -336   
-512   96     
512    -96    
-496   96     
-704   -224   
512    128    
240    16     
-784   -48    
368    -304   
-880   -192   
688    -48    
-800   -32    
496    96     
-352   176    
192    256    
-1312  176    
-352   112    
144    160    
32     128    
208    -144   
176    64     
-336   -32    
-128   -112   
112    0      
-32    -32    
-112   112    
128    -16    
-400   0      
240    128    
-48    32     
-608   64     
112    16     
-256   -64    
320    -192   
-272   608    
160    -400   
-784   -416   
176    -96    
208    544    
384    320    
-96    -96    
-80    -32    
-96    128    
-64    -208   
208    -48    
-304   -16    
128    160    
-240   -80    
64     -112   
-96    128    
144    -256   
16     112    
-256   336    
336    432    
96     128    
-96    208    
-80    528    
-112   16     
32     -352   
64     -80    
-304   144    
-608   -1152  
1536   -944   
-784   656    
144    624    
-640   528    
-224   -320   
480    -48    
560    1296   
-32    736    
-704   240    
176    -208   
368    -192   
-32    32     
-64    16     
-416   -144   
320    -368   
-192   -144   
160    -256   
-160   208    
48     0      
64     -16    
96     -864   
-272   512    
496    -80    
-1056  464    
640    -656   
80     -160   
-160   0      
-176   -224   
0      48     
80     -144   
32     -400   
32     -512   
-176   256    
464    0      
-80    96     
32     496    
-96    256    
-64    -320   
288    128    
-128   -16    
-272   176    
-48    48     
240    -16    
-144   -16    
16     160    
48     256    
-80    144    
96     -16    
112    240    
-736   -144   
1424   -2016  
-224   -48    
320    592    
192    -256   
-1440  368    
576    64     
128    -16    
368    336    
-320   368    
16     672    
256    416    
-128   240    
-272   -32    
448    400    
-176   240    
32     176    
160    208    
-384   64     
112    -48    
16     -48    
640    1264   
-1520  -880   
-672   688    
1744   400    
-1040  -128   
-304   -96    
240    1312   
688    1504   
-176   928    
160    608    
-32    96     
-64    0      
112    112    
-48    512    
-144   480    
-16    160    
224    704    
-192   384    
-384   -64    
432    -96    
-208   160    
32     176    
-368   176    
528    176    
-512   304    
0      1104   
752    80     
-112   -400   
32     -96    
0      -160   
-352   -144   
16     256    
-208   -1040  
0      656    
896    -192   
32     -144   
-96    848    
-64    256    
-544   544    
464    336    
-224   -128   
-352   0      
176    288    
336    32     
-176   -32    
-96    -368   
208    -112   
-128   -160   
-96    64     
224    48     
-736   -688   
-576   384    
-560   160    
-96    64     
1008   -208   
0      -256   
-272   1792   
-176   -688   
464    256    
192    368    
0      1008   
-496   -768   
0      0      
352    256    
-256   -2256  
-16    336    
-288   -128   
-432   -560   
352    -240   
48     112    
-112   304    
48     160    
128    16     
-336   16     
144    -128   
64     592    
-448   32     
384    112    
416    688    
-208   -1376  
-16    -112   
-192   64     
112    32     
208    576    
-192   32     
-352   -1056  
144    -976   
-176   -864   
-608   -1472  
192    -1136  
64     352    
112    928    
-208   -112   
336    -480   
-96    -112   
-64    320    
176    -512   
144    192    
-16    752    
-96    176    
-32    -464   
432    176    
-64    1088   
-384   448    
528    1312   
512    256    
-64    1184   
-160   -224   
64     -704   
-32    -112   
288    1136   
32     -1072  
32     -416   
-112   -208   
80     112    
240    -48    
-240   -400   
-160   -640   
368    -464   
-112   848    
64     304    
32     -224   
-80    -784   
0      -272   
0      -624   
96     16     
-32    -1536  
-208   544    
16     112    
32     128    
864    1904   
-1888  1136   
816    -448   
240    608    
-48    -912   
-208   -896   
256    32     
176    -272   
-16    448    
96     592    
80     432    
-176   -80    
64     -96    
112    -528   
-144   -48    
32     -80    
128    80     
112    112    
-48    -272   
224    -16    
-16    -512   
32     1872   
528    -400   
-528   -272   
304    80     
-16    -832   
160    -736   
-272   -192   
272    -544   
176    32     
-48    64     
224    -112   
-96    -224   
48     -176   
32     -544   
64     -240   
96     128    
-144   96     
256    64     
-64    -208   
96     32     
176    -144   
-416   -16    
304    288    
-320   -320   
192    192    
160    -192   
-32    -304   
-48    -32    
-112   -224   
-320   752    
1408   208    
-656   64     
-544   -1792  
544    -160   
624    -416   
-560   -272   
112    -432   
96     128    
-192   -400   
-240   128    
352    -80    
-288   -448   
176    0      
-304   -128   
176    32     
64     -288   
-400   -96    
80     -928   
288    64     
-112   80     
-688   -368   
1088   -928   
-608   -32    
272    -336   
112    272    
288    -272   
-400   96     
32     336    
176    -80    
0      -80    
-128   -192   
144    -64    
64     16     
-48    -96    
112    -496   
-16    -16    
320    -208   
-144   32     
-688   288    
320    256    
80     352    
-432   -432   
128    64     
944    -320   
-816   -64    
80     464    
16     384    
-112   -304   
48     -224   
-208   -1344  
96     160    
544    16     
80     192    
352    -160   
-304   304    
48     -160   
-144   80     
-64    -320   
272    -48    
48     -224   
112    0      
240    -288   
-128   -208   
-240   -160   
336    -288   
416    -16    
96     -1296  
288    96     
-224   -752   
-368   1808   
2192   -432   
-1840  -320   
-736   -64    
752    0      
16     -128   
208    -128   
-816   144    
320    -224   
16     96     
-16    -96    
160    128    
416    -448   
-640   96     
192    -64    
160    16     
-112   64     
-128   -80    
720    224    
-976   -352   
544    -96    
-256   -96    
128    -128   
416    -64    
-320   48     
224    80     
112    304    
-176   -432   
208    368    
-224   -96    
256    80     
-80    160    
-48    48     
-80    192    
224    -48    
-272   240    
-48    48     
0      112    
-144   -464   
-80    -48    
-48    -480   
16     -16    
128    -560   
112    -48    
-80    16     
48     112    
-96    32     
64     240    
304    528    
-368   368    
-16    208    
352    752    
224    -192   
-768   -448   
368    -256   
64     -464   
96     32     
-432   -32    
0      288    
-112   160    
-496   64     
16     16     
-224   -96    
48     336    
224    144    
-64    16     
80     -464   
-176   -272   
-896   -1008  
-400   -624   
176    -752   
-128   -128   
16     -288   
16     -64    
32     160    
-704   -112   
32     784    
-288   224    
16     144    
128    -144   
0      512    
-1040  -1360  
368    64     
592    -576   
-544   336    
-32    -160   
32     64     
64     -176   
-32    -960   
-240   256    
96     384    
0      240    
-144   32     
-176   -160   
-480   -208   
80     128    
-96    -160   
80     112    
-16    -128   
48     288    
-496   -672   
416    -704   
32     736    
480    688    
-640   576    
-16    -464   
64     -144   
-160   480    
-144   -144   
-240   224    
-48    320    
144    -144   
16     -304   
-368   -128   
80     304    
-272   64     
-16    -80    
448    -624   
96     608    
-288   144    
-160   -304   
80     96     
112    80     
-16    -176   
-80    -496   
64     208    
-864   -16    
-128   96     
-496   -592   
688    -1088  
528    -1184  
-2208  496    
1632   160    
-1104  240    
-288   816    
480    496    
-816   -608   
0      -176   
80     -112   
96     -32    
-160   -272   
-448   80     
80     0      
224    0      
112    272    
-160   256    
-256   -176   
320    -192   
-416   304    
96     64     
-256   -656   
1440   640    
-896   -224   
-1056  -784   
960    -432   
-32    688    
-80    0      
336    -1088  
16     -2384  
-688   -880   
384    992    
-272   672    
-64    -80    
144    -16    
-272   416    
-304   64     
256    -80    
32     -32    
-176   -304   
-176   -32    
-80    560    
256    464    
-48    32     
-400   -240   
560    1392   
736    0      
-960   -1824  
480    -272   
-464   -576   
-272   -16    
528    256    
-400   -32    
608    240    
-336   64     
96     464    
288    -32    
-672   -720   
800    -1232  
-416   -16    
608    240    
-160   48     
-208   112    
288    656    
-256   720    
208    48     
-608   560    
64     144    
-144   -368   
64     -208   
32     -112   
800    128    
-2336  -144   
864    1008   
96     1024   
720    1136   
-192   1968   
-640   -80    
-32    -592   
288    -544   
384    544    
-256   128    
-224   64     
96     -672   
16     -512   
-240   320    
240    336    
-160   -16    
128    -112   
160    -416   
-288   -544   
-160   -224   
-32    112    
320    240    
384    48     
-400   960    
368    -368   
-352   -112   
208    -160   
224    -432   
-176   -1248  
-592   -784   
208    -144   
240    384    
-128   80     
-144   144    
288    144    
-400   -144   
192    -112   
0      -192   
-208   -176   
-176   -32    
240    288    
-416   384    
128    496    
-112   144    
64     384    
-208   192    
-272   -368   
384    448    
80     736    
-32    384    
-448   -384   
368    -464   
256    -704   
-128   240    
-576   16     
352    880    
32     1168   
48     928    
-48    -720   
-560   -976   
176    -96    
64     -192   
272    -128   
64     112    
-224   544    
96     -432   
-64    -288   
-32    -992   
-352   -384   
16     -80    
80     240    
80     80     
-64    64     
208    464    
240    0      
-480   928    
704    1408   
-256   1360   
-96    224    
896    2064   
-1104  -128   
368    -96    
928    368    
-208   -224   
-128   608    
-304   208    
448    352    
-240   48     
-112   -16    
80     -624   
-208   320    
208    176    
192    -16    
-512   448    
320    112    
-112   416    
-64    112    
-64    -160   
128    -96    
-272   128    
-528   -848   
688    32     
336    0      
-1424  240    
1264   -720   
32     192    
0      496    
-352   272    
304    -80    
160    -160   
48     208    
144    -80    
0      112    
-96    80     
96     144    
240    320    
80     16     
16     144    
48     64     
-16    -176   
-64    48     
304    -208   
48     48     
-112   48     
-80    64     
-16    0      
448    144    
-240   -336   
-112   80     
-1008  -1680  
544    416    
192    -16    
-1168  -224   
1472   448    
-176   -448   
-784   16     
368    -608   
-240   -64    
0      -2144  
336    112    
32     -80    
32     128    
80     144    
-608   16     
400    240    
112    0      
-160   128    
144    -272   
-112   32     
272    -16    
144    432    
-1648  -48    
1072   624    
-688   -496   
-384   176    
1136   -880   
-928   -176   
528    -192   
-336   80     
64     144    
240    16     
-96    176    
32     -48    
-48    80     
32     -48    
112    -64    
224    352    
-64    272    
192    48     
160    208    
-208   -16    
464    -224   
-336   176    
304    32     
-176   352    
208    640    
256    -64    
144    208    
704    160    
-224   -832   
-224   -32    
112    -336   
224    160    
-256   -80    
576    272    
-528   -64    
176    624    
96     -48    
-240   352    
80     16     
224    -32    
0      80     
80     -96    
64     64     
176    -112   
80     160    
-272   -144   
-16    144    
-64    -848   
1360   -3952  
-3232  -1616  
1520   992    
128    176    
-176   -352   
48     -304   
-208   -336   
16     -480   
-272   -624   
272    272    
80     -48    
-512   240    
528    80     
96     160    
-384   -144   
240    -592   
176    80     
64     112    
16     -96    
144    -1600  
112    -48    
256    32     
-272   -288   
-560   -144   
272    -32    
384    -16    
-160   -192   
224    -544   
-304   32     
336    -128   
0      -208   
-48    192    
0      32     
112    464    
-176   32     
80     256    
112    -32    
-272   -176   
336    224    
-272   -32    
240    48     
240    -672   
-112   464    
272    592    
-304   -96    
-128   -1056  
-32    96     
512    336    
-352   192    
128    208    
160    0      
-48    128    
-432   288    
432    256    
-192   -432   
288    224    
-16    -16    
32     704    
192    144    
-192   160    
192    -64    
32     0      
-144   64     
-96    -128   
160    0      
336    624    
-464   224    
-112   128    
-656   848    
352    352    
-32    -688   
-16    -256   
-256   160    
-48    -16    
160    272    
128    496    
-160   480    
-64    48     
240    448    
-160   -448   
32     128    
-944   -1840  
0      -720   
-224   1136   
-416   720    
144    -16    
320    -1536  
176    -1840  
16     -16    
272    -480   
272    -704   
-112   288    
-32    -80    
208    224    
16     -304   
16     -192   
-96    -176   
112    -128   
256    -272   
16     -320   
-608   -112   
-48    -928   
-352   -416   
160    -448   
368    -688   
368    -416   
-80    480    
-352   144    
-64    -80    
96     -112   
160    -16    
-352   -80    
-224   240    
-160   112    
-96    -256   
-224   -368   
80     -496   
-256   48     
-64    -224   
304    240    
0      -1504  
-80    -48    
-400   -48    
112    144    
240    96     
240    64     
-816   176    
-16    32     
-32    -32    
160    -96    
-304   240    
-384   1824   
2128   144    
-288   80     
-16    304    
-64    -128   
-32    192    
-208   400    
192    80     
-176   -464   
-192   -288   
-176   -464   
256    432    
-64    -32    
32     320    
-400   -560   
192    352    
336    -64    
-976   960    
32     -976   
96     -240   
240    992    
-1520  -848   
-1680  32     
1808   -880   
-992   -128   
416    896    
640    2000   
-704   2368   
-592   1520   
848    1136   
-1280  -560   
-384   -48    
368    -768   
-288   -48    
-240   -352   
-176   256    
448    496    
-432   544    
-192   112    
208    224    
-48    64     
-64    352    
64     288    
-528   32     
208    16     
-288   -704   
64     -416   
-336   -1888  
-592   -848   
208    128    
-320   272    
-208   432    
96     240    
-144   -288   
-16    -352   
768    112    
-448   1136   
-432   432    
-352   -336   
672    -272   
-192   -48    
-192   192    
-208   -848   
-32    -80    
128    -208   
-592   240    
432    80     
192    224    
-272   448    
-560   -128   
560    1568   
368    -192   
-1184  -224   
-416   240    
0      112    
1520   112    
-1136  16     
-688   -432   
560    -480   
544    304    
-160   -96    
-624   -112   
160    -16    
224    -16    
192    112    
48     -64    
-432   112    
160    -320   
-416   -784   
-80    736    
-64    608    
-128   608    
448    -176   
-384   -144   
208    464    
272    96     
-512   48     
224    -80    
256    64     
-96    496    
288    176    
-480   16     
320    64     
-288   -48    
32     96     
-64    -112   
160    336    
32     400    
-192   208    
80     0      
-160   32     
-96    96     
-80    192    
16     144    
-176   0      
32     -80    
-656   -592   
128    -304   
-16    -112   
32     112    
-208   16     
368    480    
704    304    
-400   224    
96     272    
-176   0      
64     -112   
416    -64    
-304   112    
-64    48     
0      112    
0      96     
-176   176    
-96    16     
320    96     
0      -48    
-256   48     
192    208    
16     -624   
-224   64     
0      224    
48     144    
-128   16     
96     16     
-352   -432   
592    -336   
-112   384    
48     48     
16     176    
-384   336    
1296   672    
-2976  1056   
752    -336   
768    48     
-464   -80    
80     80     
16     -400   
-176   240    
-16    128    
96     64     
-16    128    
-384   352    
304    16     
-192   -432   
-16    -64    
112    272    
-272   304    
208    -16    
-16    112    
96     48     
-576   -496   
1120   -208   
-736   256    
-32    0      
-176   160    
-192   112    
64     144    
64     304    
16     -336   
-224   192    
-48    128    
-144   112    
304    160    
400    64     
-704   192    
64     -48    
112    208    
96     160    
-176   32     
-128   64     
176    32     
-144   32     
144    96     
-192   32     
336    240    
-64    -32    
-384   224    
560    -32    
-352   32     
48     -224   
288    880    
112    -624   
-32    96     
16     -128   
-592   32     
560    224    
208    224    
-560   144    
224    224    
-288   32     
272    64     
64     112    
-64    96     
-224   144    
576    240    
-320   80     
-176   32     
368    144    
-176   -16    
176    112    
48     208    
-976   -288   
1072   -688   
272    -224   
-864   -176   
880    224    
64     160    
-336   -304   
-96    160    
384    192    
-208   0      
-96    176    
416    144    
-144   32     
-272   256    
432    32     
-112   -320   
32     -976   
-208   16     
304    128    
64     112    
-32    -128   
624    16     
-624   176    
96     -144   
272    32     
-80    192    
240    960    
-672   80     
-48    -240   
240    64     
-16    -32    
224    -336   
-64    192    
272    16     
352    336    
192    -16    
-288   -176   
240    -336   
-288   368    
192    16     
-224   48     
368    16     
96     128    
-352   0      
224    256    
688    96     
0      80     
-288   80     
-576   -928   
832    2896   
272    480    
-2000  -80    
720    -240   
832    160    
-496   208    
64     48     
-352   -144   
576    400    
-416   -64    
64     64     
224    48     
-240   -256   
256    192    
240    -848   
-96    0      
-336   144    
544    144    
-544   176    
16     432    
96     -384   
176    160    
-528   -288   
-48    272    
272    -240   
-480   -288   
192    -32    
-208   -160   
96     -240   
208    -960   
-272   -256   
96     -2544  
48     208    
144    -256   
-368   -304   
368    48     
-320   368    
-528   -352   
496    -480   
16     -176   
-80    -384   
0      -208   
160    -160   
48     -128   
192    -240   
96     64     
0      -1744  
32     768    
192    464    
32     -720   
-80    -384   
0      1056   
656    -48    
-352   192    
720    416    
-496   -64    
32     272    
592    1168   
-80    704    
-16    -1344  
-32    32     
112    -704   
64     176    
96     32     
112    624    
32     192    
224    -192   
-512   -272   
128    160    
336    -112   
224    -96    
-64    144    
-32    -208   
240    384    
-96    -272   
-64    208    
-16    176    
192    128    
-176   -32    
80     176    
96     -80    
-576   512    
992    -304   
-784   0      
208    -32    
256    -176   
64     -64    
128    -224   
-208   192    
-128   144    
272    80     
64     -80    
16     64     
-160   -96    
240    -1200  
32     144    
208    -624   
-96    -256   
32     16     
16     -1312  
-48    -304   
528    -160   
-256   32     
880    64     
-544   160    
-176   208    
224    32     
-64    -368   
96     -176   
224    -240   
-80    48     
224    128    
-112   -80    
64     -272   
48     336    
304    -32    
-384   336    
160    416    
48     1056   
-64    -16    
-16    80     
80     64     
-96    112    
128    192    
192    -160   
16     320    
-160   160    
272    -368   
480    -272   
-544   -160   
912    -576   
-2992  -1152  
-96    -32    
1232   -1760  
-368   -1056  
-32    -480   
256    -1120  
320    688    
-512   592    
320    -672   
-128   80     
-400   -64    
304    -112   
-304   -240   
-208   -288   
176    -112   
32     -176   
80     -736   
-672   -1008  
192    480    
80     -448   
1280   240    
-2064  -448   
592    288    
1056   432    
-704   736    
304    -48    
720    -352   
-336   -832   
-256   -560   
-320   -336   
-192   32     
176    -176   
544    -400   
-112   32     
-112   -48    
-48    -288   
624    96     
176    400    
-16    176    
-624   272    
112    208    
368    240    
-624   -176   
384    -752   
160    848    
-176   -96    
-368   304    
288    -400   
-368   -128   
192    -1008  
-208   16     
-112   -1152  
16     -64    
-208   -144   
432    -208   
-80    -96    
-32    -336   
640    240    
-544   96     
-592   32     
208    -48    
-288   -272   
512    -832   
-496   256    
592    -304   
64     32     
208    -1408  
176    912    
-800   336    
-640   2352   
1024   576    
-1376  0      
-48    -224   
1008   144    
112    64     
-704   -384   
-608   -80    
320    -432   
32     272    
320    -256   
-656   32     
336    -240   
96     -208   
-272   112    
320    -112   
-496   64     
320    48     
-48    -1136  
-688   -1520  
160    -288   
-160   64     
160    176    
752    -96    
-864   16     
320    -320   
-32    112    
352    -784   
-512   -96    
192    -192   
-96    32     
160    128    
-96    384    
208    528    
128    96     
-96    416    
-224   0      
-48    368    
560    -80    
-288   112    
-416   -368   
-16    176    
-128   -96    
336    -80    
-176   -272   
-240   -192   
-48    -160   
-192   -80    
0      96     
64     176    
-128   176    
-784   -768   
-576   208    
192    -160   
288    0      
-400   -336   
-32    -176   
-32    112    
-336   128    
-256   48     
-224   32     
-64    -48    
-192   -160   
64     48     
-32    0      
-144   64     
0      176    
304    416    
144    112    
-624   416    
496    16     
-128   64     
-224   48     
80     -64    
-208   -64    
48     -32    
-32    448    
-352   -192   
-64    -160   
-144   -48    
624    2640   
-1504  -1744  
-1376  368    
2032   -432   
-512   -416   
-800   112    
448    320    
448    208    
-400   -64    
112    -64    
-176   448    
16     64     
288    -32    
-128   -64    
-256   -256   
-16    400    
-128   128    
240    -80    
-208   256    
96     96     
-288   16     
816    880    
400    -128   
-1152  -32    
544    16     
464    -112   
-560   288    
-32    -368   
320    0      
-624   160    
192    -80    
-592   -32    
208    -96    
-160   32     
128    128    
-32    160    
-16    480    
224    64     
-256   256    
320    -80    
-176   -80    
-48    32     
96     96     
112    0      
80     -32    
80     64     
-496   80     
112    96     
64     -48    
16     112    
-1040  -432   
400    512    
-32    256    
-400   0      
-320   -128   
560    144    
48     -176   
-80    -80    
-144   160    
-384   -80    
176    144    
112    -112   
-80    160    
176    400    
-272   48     
-112   272    
288    -64    
-416   0      
256    -176   
80     -32    
-96    80     
16     -416   
-1328  864    
1200   272    
-704   -96    
-256   80     
512    -64    
-112   272    
-528   -112   
-384   16     
592    -16    
-192   64     
-32    112    
-64    96     
-48    -32    
-256   16     
272    32     
-224   128    
-48    288    
176    -80    
16     32     
-64    80     
-256   112    
1200   48     
-1216  208    
64     -16    
400    144    
-304   -160   
80     272    
-64    -80    
-464   16     
416    128    
144    -128   
-16    304    
-304   448    
-16    400    
112    304    
-304   -160   
-64    48     
-16    48     
240    160    
192    -224   
496    -16    
-576   224    
272    96     
192    320    
-32    -64    
-352   208    
96     112    
-48    768    
1904   3296   
-2048  2288   
1120   -336   
992    -608   
-768   64     
-208   -32    
272    16     
544    -736   
-224   112    
144    -48    
-48    192    
-112   128    
32     112    
112    0      
-128   -112   
176    80     
0      -48    
64     -96    
-64    224    
416    304    
-96    -432   
-384   -464   
80     -304   
208    768    
-288   464    
-256   272    
640    640    
-336   272    
144    416    
-144   -496   
240    -112   
-48    64     
32     -160   
144    -112   
-320   -240   
128    288    
80     96     
-128   64     
176    272    
-48    -480   
-288   192    
480    368    
-32    -416   
448    864    
-448   544    
-144   -80    
416    -320   
-144   -592   
48     80     
-16    304    
192    -80    
528    1152   
-624   -816   
-784   -688   
944    -160   
-736   960    
192    32     
-144   -624   
176    224    
112    -80    
-368   -768   
144    16     
160    240    
-224   96     
480    384    
224    16     
64     -160   
144    -224   
-400   -240   
-128   176    
288    -16    
-160   176    
48     -16    
-144   112    
64     176    
16     -144   
16     96     
416    224    
-80    304    
-144   144    
240    48     
688    304    
-1600  800    
528    -144   
-96    352    
448    -352   
-32    48     
-176   320    
64     112    
-16    -160   
-16    -368   
-96    240    
-128   -1328  
-16    96     
80     32     
-80    16     
48     64     
-240   304    
192    96     
320    -48    
-96    -176   
112    -336   
-864   32     
400    144    
80     272    
96     80     
-128   64     
-80    -624   
64     64     
240    -160   
-112   -80    
32     80     
-160   -48    
80     -80    
80     -32    
-96    -96    
48     -288   
-64    272    
16     -320   
-32    656    
32     352    
-80    208    
336    -208   
-96    -112   
-128   -384   
48     208    
-128   -80    
368    64     
-64    32     
-480   352    
208    608    
352    1248   
2256   -256   
-1344  -368   
-416   368    
1472   -832   
-160   -48    
336    -720   
-208   224    
-128   304    
-80    1232   
720    480    
-16    352    
-256   -144   
-352   -64    
528    -80    
112    -80    
-288   -304   
-160   -400   
496    -48    
-48    -384   
384    1392   
-784   -1200  
-944   576    
1248   -784   
-1536  -96    
1088   -592   
-912   -1104  
640    736    
432    592    
-304   192    
-32    -976   
0      256    
176    112    
272    0      
-480   -288   
32     304    
304    -64    
-16    32     
-64    96     
-80    96     
192    -16    
128    496    
-656   -576   
16     432    
736    176    
-640   -624   
752    592    
224    -240   
-336   96     
208    -352   
208    336    
112    -352   
144    368    
128    -80    
-272   -624   
-432   -176   
384    -1856  
144    928    
496    208    
112    -64    
48     64     
-32    -256   
-32    -48    
-256   -496   
304    -80    
-240   160    
-144   32     
128    64     
-80    -752   
-112   -3024  
1008   -3072  
-64    96     
336    240    
-368   112    
-528   128    
512    -240   
320    128    
144    -352   
-608   -416   
480    -192   
-112   -32    
-144   -272   
464    448    
-288   -224   
224    416    
-80    -80    
-192   208    
160    -48    
-224   560    
720    -192   
-1312  528    
368    -464   
528    128    
320    -272   
-784   -32    
640    16     
-432   -192   
272    -480   
-128   48     
0      -16    
-48    192    
16     -208   
-192   -80    
208    32     
-576   192    
160    -16    
-704   -336   
560    128    
-256   -400   
-160   -32    
448    -224   
-384   64     
176    -304   
-80    256    
256    352    
128    -16    
-352   80     
368    -112   
-80    48     
-320   16     
144    32     
-288   -144   
64     112    
-400   192    
-272   64     
848    288    
-272   16     
-96    -864   
-32    224    
-224   80     
288    112    
-48    96     
-160   96     
80     -160   
-48    -384   
0      192    
-48    448    
-144   80     
416    -592   
-512   128    
352    -96    
16     112    
-240   -688   
80     128    
240    -656   
16     -128   
-224   160    
448    576    
32     352    
-208   -352   
432    -1424  
-2624  1520   
1424   176    
128    160    
-704   -112   
480    -48    
-608   -112   
-144   -416   
848    16     
-160   -128   
-304   -304   
-80    224    
176    80     
-80    -448   
-272   224    
0      208    
-352   80     
288    -224   
240    -128   
-432   0      
112    688    
-544   -416   
80     160    
864    160    
-272   -544   
-112   -160   
-224   416    
-256   224    
80     -176   
144    -160   
-112   144    
-144   -80    
240    -16    
-224   48     
16     192    
80     128    
-128   192    
672    304    
-624   336    
-16    160    
32     32     
64     -80    
-128   176    
0      -16    
96     288    
48     64     
-224   144    
48     -16    
48     -64    
-432   640    
-560   304    
2416   128    
-1872  -160   
352    -384   
576    -32    
-528   16     
-96    192    
-176   304    
-128   304    
-128   -48    
144    32     
16     -64    
-16    112    
-112   -384   
-304   32     
432    -240   
-288   144    
16     -272   
-512   -480   
112    -240   
-256   48     
480    560    
1056   -16    
-1376  208    
304    -272   
16     -592   
272    64     
-192   224    
288    -240   
-64    176    
-288   -144   
32     -96    
-416   112    
448    -48    
-192   288    
480    -32    
-320   32     
336    368    
-80    80     
-176   -16    
112    -64    
-464   -64    
400    240    
-224   384    
192    -384   
-208   48     
80     320    
960    -416   
-640   112    
816    64     
-144   272    
80     112    
-320   -96    
-48    -160   
304    -304   
672    -176   
-544   240    
-432   672    
352    -304   
16     -48    
-608   96     
384    -32    
-128   144    
96     208    
48     -192   
-128   256    
528    48     
-80    112    
-32    176    
-432   32     
464    -1808  
-1952  -1040  
96     112    
-368   128    
-192   -16    
-80    -432   
224    944    
-320   1360   
336    -416   
-48    -576   
-64    -240   
-64    128    
-16    -16    
224    -160   
-224   464    
16     1168   
80     112    
-288   -32    
64     -624   
-96    16     
-128   240    
-80    48     
400    448    
384    -752   
-560   -400   
80     -784   
-640   -352   
192    -336   
-256   448    
272    -80    
-320   416    
-80    -32    
-176   -112   
-336   -992   
-416   -832   
128    0      
-384   256    
320    544    
144    -80    
-656   -592   
-176   -208   
-112   80     
160    0      
-224   -560   
256    80     
-208   368    
208    304    
-304   -288   
-240   -384   
272    208    
-128   224    
784    672    
272    -96    
-704   -80    
144    480    
-416   432    
272    -1136  
-288   -1504  
576    -256   
-128   736    
0      -208   
-272   0      
256    128    
32     -448   
-80    -256   
-256   112    
-272   240    
368    0      
48     128    
112    -48    
64     96     
-64    160    
-32    -16    
-64    0      
112    16     
-176   256    
-96    672    
32     992    
-272   -64    
160    -192   
-128   80     
-528   944    
1024   -240   
-800   112    
416    -192   
48     -368   
192    48     
-192   -384   
480    -720   
144    16     
144    0      
144    -336   
-64    160    
-144   -128   
176    64     
-112   -112   
-64    -80    
192    32     
208    -16    
-192   48     
-432   -192   
832    -592   
-480   768    
864    -208   
-496   -240   
-256   368    
-176   -272   
416    -160   
304    944    
208    16     
-560   -752   
176    0      
336    672    
32     -272   
48     544    
-496   128    
352    -32    
256    -16    
64     -272   
-448   272    
-16    -80    
208    144    
80     368    
272    96     
-224   -16    
-256   -32    
368    32     
64     240    
-64    16     
288    672    
-224   -1040  
-1520  -224   
1168   -320   
-800   272    
704    272    
-544   208    
192    -144   
112    -432   
-272   320    
240    16     
224    144    
-160   16     
-64    96     
48     96     
336    144    
-48    64     
-208   32     
288    128    
16     64     
-64    -240   
48     144    
0      -400   
-1040  960    
1056   -192   
-128   272    
32     -32    
144    -320   
128    -176   
-944   416    
736    -112   
-128   0      
32     192    
128    144    
-176   48     
96     112    
256    -160   
-224   112    
48     -384   
-128   -96    
512    64     
176    160    
208    736    
-592   112    
0      176    
-128   304    
336    -48    
256    576    
-368   -64    
-416   -848   
176    -96    
80     -416   
-384   224    
384    -224   
288    0      
-128   -3472  
192    -656   
-272   176    
528    16     
496    304    
144    480    
-496   80     
192    128    
560    224    
-416   208    
-128   -16    
416    512    
528    -224   
-528   112    
272    144    
-32    -1952  
-2064  -3312  
-144   -304   
32     176    
-432   -272   
352    32     
-160   192    
-368   48     
-32    160    
464    544    
-688   -48    
144    -80    
272    -16    
-96    -256   
-96    64     
176    -560   
176    -48    
-128   -400   
112    -16    
448    336    
-1024  128    
720    448    
288    -48    
-608   -96    
-192   160    
-16    336    
464    -112   
-176   -80    
192    -320   
-160   144    
128    32     
-64    192    
256    -208   
-240   -64    
-96    128    
-96    80     
608    368    
-448   192    
224    480    
256    -96    
-368   304    
480    -720   
-656   32     
272    48     
240    240    
-96    -112   
224    176    
112    112    
96     240    
-352   -128   
368    -176   
-336   -176   
-32    -672   
-832   96     
656    -432   
-176   -48    
48     -176   
288    288    
160    -112   
160    -336   
-224   -304   
16     64     
0      -208   
128    96     
160    160    
-96    448    
-96    -112   
48     -2048  
416    -208   
-272   -352   
-64    64     
480    0      
-32    352    
-144   -384   
160    -240   
-96    -320   
0      -208   
288    64     
-160   -608   
-64    -96    
16     -336   
-544   -1552  
1536   -448   
-1584  496    
-16    -80    
592    -320   
-512   -224   
160    -2256  
224    208    
576    1200   
-160   160    
-96    -512   
304    48     
128    48     
-96    48     
48     128    
64     -272   
-96    -16    
464    0      
-112   -256   
16     -544   
80     -32    
-240   -80    
1072   -672   
-560   320    
-352   480    
256    -80    
80     -304   
176    -1008  
-192   -160   
176    80     
16     -144   
64     176    
-48    -128   
-48    -96    
-32    96     
96     0      
-16    -240   
-16    -32    
48     -80    
224    -192   
128    -480   
-96    272    
128    96     
32     64     
240    0      
-432   -144   
320    112    
32     48     
-160   -144   
-16    -112   
512    928    
320    -256   
-2384  -64    
1648   -544   
256    272    
-944   208    
-32    240    
368    96     
448    -192   
-64    0      
-160   -240   
-96    80     
64     -48    
192    -16    
144    -80    
-736   -64    
-336   -208   
288    -16    
160    -96    
80     -64    
-144   -288   
-80    -944   
-192   -80    
416    -640   
-416   -496   
672    -272   
-32    -128   
0      -272   
-416   -496   
-96    -112   
-224   368    
416    32     
-176   0      
-176   -32    
400    208    
432    -368   
-400   64     
48     -576   
-352   336    
224    -48    
176    -112   
-80    -48    
-64    -176   
-96    64     
-176   64     
176    -160   
-448   272    
-112   1200   
992    -352   
-336   96     
48     -320   
-16    112    
176    -160   
16     -112   
400    -480   
-112   -288   
400    480    
176    240    
272    96     
416    304    
-304   -112   
16     64     
176    48     
240    -80    
64     160    
496    1120   
-656   976    
-48    0      
144    224    
304    416    
-80    272    
-1664  -592   
-192   -144   
528    -240   
-800   32     
880    512    
-144   896    
-1024  432    
448    -416   
416    432    
-80    -800   
-384   496    
-176   224    
-592   -272   
192    -176   
160    352    
-80    32     
176    -352   
-80    -16    
272    -432   
-96    752    
-32    416    
144    -480   
-656   -160   
224    -368   
-64    -1104  
32     304    
-64    -816   
-320   -896   
-128   864    
112    -64    
-144   -752   
-992   128    
-304   -80    
80     288    
-208   -544   
0      -384   
160    0      
-208   -80    
64     256    
16     -560   
-48    448    
-224   400    
0      -704   
32     448    
-368   144    
-240   -368   
-256   976    
-160   336    
64     -368   
160    -368   
-320   -944   
416    -96    
-592   -272   
208    176    
-48    -64    
-608   -240   
-80    160    
144    336    
48     -160   
-592   -608   
-32    208    
96     -48    
144    -96    
-496   -48    
-48    80     
-32    144    
176    400    
-224   -128   
-688   320    
-48    -160   
-400   -32    
240    0      
48     64     
-96    -400   
96     -848   
-256   -608   
144    -736   
-128   -368   
-400   368    
112    672    
-80    64     
208    -656   
-704   688    
1184   704    
-384   656    
176    512    
-192   448    
64     -624   
384    -896   
-256   720    
-224   -48    
-112   256    
320    -80    
-16    -16    
-128   352    
-720   -448   
-64    -160   
176    -544   
48     368    
-304   192    
-112   240    
240    -432   
96     1360   
288    128    
-512   -592   
352    1024   
32     80     
144    112    
-176   -48    
-64    512    
-64    368    
128    336    
-256   -224   
32     240    
224    0      
-64    96     
-96    -432   
-144   -304   
160    -48    
-208   -160   
96     176    
-32    -48    
48     -48    
-32    -16    
64     48     
-512   -224   
192    112    
160    48     
-48    -144   
496    240    
-1392  256    
1328   592    
64     -96    
-1216  -160   
1312   512    
-48    -464   
-768   -224   
480    -560   
-304   48     
32     -16    
-128   112    
208    96     
-128   96     
-64    160    
624    192    
-448   32     
160    16     
80     64     
-32    -128   
-96    144    
128    112    
128    704    
-1504  -64    
144    80     
592    -48    
-960   -32    
672    128    
-304   -96    
240    416    
384    32     
-64    -144   
48     144    
-32    144    
0      80     
-320   -16    
320    48     
-64    -64    
208    160    
-336   592    
-144   304    
-48    80     
256    448    
-448   -512   
-272   432    
544    0      
-416   -544   
256    -224   
224    -96    
-160   -336   
-640   80     
736    448    
0      80     
-272   176    
224    32     
-224   -496   
208    -16    
-368   -64    
-48    -304   
624    -112   
-176   32     
-736   96     
224    208    
416    -128   
96     224    
-656   -272   
-16    336    
496    32     
272    -112   
-256   -16    
544    -608   
-2448  -3088  
-544   32     
992    -48    
-992   -80    
944    16     
128    224    
-608   176    
-32    208    
448    320    
208    -320   
-80    96     
-224   -16    
-112   144    
144    -160   
192    208    
-224   0      
-160   256    
128    -80    
-128   -240   
1056   -784   
-880   -48    
752    176    
-528   80     
288    80     
192    -48    
-672   -64    
960    -336   
-448   -80    
144    16     
16     -752   
224    64     
0      176    
64     144    
-208   32     
512    48     
-256   -192   
112    144    
528    48     
-112   112    
112    112    
-16    176    
304    192    
-64    -16    
272    -32    
64     -704   
-336   384    
320    224    
-16    0      
-288   48     
256    -64    
-352   -144   
464    432    
-944   256    
560    -512   
-192   -480   
-320   32     
288    32     
-192   -464   
320    -64    
144    -720   
-32    -128   
-80    0      
-16    80     
96     -48    
-80    -32    
64     -96    
80     48     
-16    416    
128    656    
-112   624    
192    464    
80     -144   
144    -160   
64     288    
-48    -16    
-144   352    
224    -688   
-240   688    
304    112    
16     -16    
-576   -832   
1600   336    
-736   624    
0      -16    
-32    -544   
-432   -64    
432    176    
320    96     
80     272    
-624   160    
288    32     
320    -1168  
48     16     
-224   -1072  
96     144    
96     -48    
160    560    
-160   240    
16     96     
-48    -176   
128    112    
-352   -192   
160    -864   
144    -112   
64     -128   
96     -208   
0      -1168  
-128   192    
144    -144   
160    -32    
0      -192   
48     288    
16     336    
-160   192    
80     -192   
352    -144   
-16    464    
-304   160    
208    240    
-16    -176   
-256   -176   
192    160    
192    16     
-224   -80    
96     144    
-96    -176   
160    64     
64     352    
16     -80    
-128   0      
16     -1168  
1808   -400   
-1696  -368   
784    96     
720    -160   
-656   288    
1216   1136   
-192   384    
-320   -1120  
160    -832   
-176   -32    
320    208    
-320   64     
400    464    
-208   384    
-160   288    
624    96     
64     -208   
-416   -800   
368    -816   
-32    -176   
-624   -672   
560    144    
1216   -288   
-1424  80     
352    -224   
464    -2864  
-448   -992   
32     -1760  
16     -784   
96     -416   
-80    32     
240    -80    
160    -864   
-320   -176   
416    -16    
176    48     
-320   176    
160    -112   
176    -608   
144    -48    
80     272    
-336   -16    
112    1136   
-736   608    
80     624    
-64    -352   
400    224    
-992   -1536  
480    -1488  
208    -624   
-64    288    
448    -80    
16     -64    
-912   -992   
272    -640   
176    -464   
320    -176   
-64    -128   
-176   -368   
320    -608   
-560   -400   
160    -240   
144    368    
272    -352   
352    288    
416    -80    
-400   -432   
240    -656   
256    -128   
64     320    
208    1936   
1424   640    
-1760  -880   
-176   -160   
224    -864   
64     -304   
96     720    
-752   -400   
176    -576   
416    -112   
176    240    
-176   -144   
-576   -400   
464    464    
304    0      
-208   -864   
96     -272   
64     -96    
-96    528    
-112   -256   
128    16     
256    256    
-432   -496   
-384   -336   
448    -1120  
0      208    
384    -336   
-432   -1168  
-400   -320   
320    528    
16     304    
48     -144   
320    64     
-544   256    
80     96     
192    -48    
-416   -608   
-464   -848   
-48    -32    
144    160    
64     48     
208    -432   
-176   160    
-96    -208   
336    -1056  
112    -256   
-176   240    
144    864    
64     480    
-224   -448   
336    720    
-432   480    
-464   -640   
208    -176   
-448   -32    
-224   320    
720    -336   
192    576    
-352   -1728  
112    -688   
-128   -704   
-48    -720   
-80    -272   
-144   -368   
-368   80     
272    -144   
-320   -144   
-224   144    
-256   256    
272    -144   
-32    192    
0      -304   
-128   -160   
-384   128    
384    -240   
-352   -176   
16     336    
0      16     
112    112    
-224   -192   
-448   976    
1840   -416   
-1392  128    
576    -624   
256    -336   
-160   -448   
208    -864   
64     272    
-480   496    
-32    144    
448    -16    
-160   48     
-64    -128   
224    -256   
224    144    
112    576    
208    912    
-384   592    
-96    320    
288    -288   
112    -864   
-576   176    
496    144    
-768   80     
80     32     
-224   176    
-16    -64    
-96    -144   
-16    64     
256    -272   
-96    96     
-224   144    
-960   -32    
-48    -48    
80     -32    
16     -16    
-80    -64    
-176   -240   
112    -64    
64     -64    
-80    64     
96     160    
-224   16     
-288   80     
-256   -224   
-480   -96    
464    160    
-240   96     
176    224    
2192   2480   
-720   -832   
-3360  288    
2192   96     
16     -96    
-1280  96     
864    352    
224    112    
-768   112    
48     -176   
208    48     
-64    96     
144    112    
-96    -80    
-480   -112   
128    -96    
80     128    
-176   96     
112    -32    
400    64     
-288   -144   
48     0      
976    448    
-1728  80     
-352   -864   
864    160    
-416   -96    
-752   144    
1168   -224   
-112   32     
-368   -112   
160    96     
16     96     
-16    64     
-224   240    
896    -48    
-576   160    
96     496    
336    48     
-240   208    
48     64     
-112   96     
-320   -544   
224    560    
144    -176   
-1136  272    
944    -592   
-736   -368   
320    -208   
-16    240    
-208   -192   
-512   16     
256    48     
432    -192   
-384   224    
-384   -336   
16     -320   
32     400    
-1136  -144   
96     -144   
272    -48    
-352   32     
224    96     
128    64     
-144   64     
432    368    
-1088  432    
128    -80    
208    48     
-96    -112   
544    4256   
1168   416    
-1280  -128   
1488   -128   
848    224    
-1104  400    
-752   48     
1536   48     
112    96     
-832   128    
-256   240    
160    176    
528    -48    
-240   96     
-224   -32    
-176   256    
576    -48    
-80    128    
-48    -96    
-800   -1216  
560    48     
-112   32     
48     112    
320    64     
-400   -16    
192    112    
-16    16     
-112   80     
32     -208   
-592   -224   
352    -304   
-128   96     
128    112    
-608   -96    
384    144    
-80    192    
208    240    
-576   -112   
-160   -192   
-240   -16    
96     -32    
224    16     
-304   -48    
144    320    
-320   32     
-144   128    
112    -48    
-160   -160   
128    -224   
-112   -128   
0      80     
16     64     
288    -96    
256    320    
128    1520   
576    800    
-256   128    
-224   -160   
48     64     
-64    -192   
-432   -144   
-48    -176   
32     0      
128    80     
144    -304   
-80    -144   
-112   -96    
-272   112    
128    -288   
-16    -16    
48     384    
-256   624    
512    240    
-240   560    
-112   512    
-80    32     
-160   -48    
416    -320   
-64    96     
-16    656    
-224   256    
1008   752    
-1552  1552   
1136   -592   
272    -32    
-640   528    
160    -240   
96     1664   
80     -304   
-192   -64    
176    336    
-128   32     
-64    -32    
176    48     
80     16     
-176   112    
400    384    
112    272    
-160   -80    
112    176    
64     224    
704    384    
-1408  1024   
544    -448   
448    -832   
144    240    
-128   512    
-112   1056   
640    -560   
0      -240   
-32    416    
-64    -400   
64     352    
48     -384   
16     16     
-208   16     
-32    -16    
-16    320    
528    368    
-592   -912   
-192   -576   
512    144    
240    144    
-224   400    
-96    -16    
80     48     
0      16     
176    208    
64     -64    
-48    272    
128    16     
-560   -848   
-1536  480    
1792   -48    
-528   -880   
-16    -688   
464    -320   
-448   -800   
-208   624    
400    -560   
64     256    
-336   -240   
-32    112    
112    -48    
-16    208    
64     -112   
80     128    
16     192    
96     -160   
496    -112   
0      16     
-16    560    
464    -1168  
-912   624    
1008   240    
-800   -96    
304    -464   
320    -96    
-784   -832   
192    -864   
80     -112   
-80    1328   
112    448    
64     -96    
-48    -288   
336    -736   
64     -16    
-240   96     
272    432    
-688   -1504  
352    464    
272    48     
-288   -336   
544    -848   
-320   320    
-688   -944   
288    -768   
-80    -496   
1040   -448   
496    64     
-208   -336   
96     64     
-144   -448   
-48    528    
-304   -672   
912    240    
16     -1344  
160    -880   
384    -720   
-416   -272   
640    -48    
0      64     
-160   256    
-96    -416   
64     -32    
144    32     
-192   352    
48     -272   
-16    736    
304    128    
-144   432    
336    -1232  
-1648  -528   
896    -48    
-176   -528   
-240   -128   
-256   624    
-320   -304   
736    2016   
448    432    
-720   -704   
-48    -848   
464    -528   
16     352    
-96    352    
-320   272    
-288   -32    
448    304    
-192   64     
16     -48    
-976   -1248  
544    -592   
288    -96    
-464   -208   
176    64     
224    -128   
-144   -240   
448    -816   
32     -32    
-16    -272   
32     16     
-64    -1424  
304    480    
-96    -48    
112    48     
176    96     
-32    544    
48     160    
-80    64     
96     400    
-16    400    
-80    400    
256    144    
-32    -96    
288    -192   
-48    -320   
80     -480   
-144   16     
112    -464   
-16    -1056  
-304   -416   
-128   -272   
-176   -2144  
-768   -160   
1168   -288   
-192   224    
-16    224    
128    -480   
-576   -192   
240    -432   
-368   -272   
416    -32    
80     -128   
-128   208    
0      -336   
112    0      
-304   -144   
144    -128   
-32    -240   
48     -1376  
-160   -80    
-32    -672   
-304   -560   
272    -224   
128    -144   
-112   -16    
256    432    
-464   -320   
48     -96    
384    -640   
0      -208   
-400   128    
-256   -2752  
-688   368    
1360   -560   
-704   16     
64     -288   
-48    80     
704    -256   
-288   -304   
-432   304    
272    48     
48     -16    
256    32     
-112   -32    
48     32     
16     704    
-672   -320   
64     -256   
-16    -768   
-224   -256   
144    48     
-176   832    
1088   -512   
-816   -112   
320    -1248  
224    64     
-160   496    
208    192    
-32    128    
-256   -96    
-32    -128   
432    80     
-240   64     
-144   -64    
176    64     
-48    -32    
176    192    
320    -176   
-160   -16    
336    -1440  
-272   176    
224    112    
160    144    
32     0      
-128   -432   
-144   224    
464    -80    
-624   208    
624    -80    
-240   64     
384    -1200  
-1824  -1648  
896    -512   
-336   384    
-256   -320   
336    128    
80     144    
80     288    
48     160    
-80    -144   
224    -48    
32     -64    
-400   64     
432    16     
-656   0      
-160   0      
400    48     
32     -208   
-464   64     
16     -480   
80     96     
384    -1072  
656    -208   
-2272  288    
1520   400    
-16    -112   
-1824  208    
1120   144    
-816   -80    
-256   -208   
224    -80    
96     160    
32     -112   
-80    144    
176    -80    
-16    0      
-352   176    
240    -96    
-64    128    
-384   -128   
-176   -48    
224    -32    
-640   -64    
1248   -32    
-432   -64    
-288   224    
640    256    
16     -320   
-288   -496   
352    -144   
160    112    
-192   96     
-16    -304   
-192   16     
304    -272   
784    -64    
-432   -32    
192    352    
-80    96     
-448   -288   
384    -160   
176    144    
-80    -208   
96     96     
-144   -224   
-528   -48    
480    208    
-144   80     
-240   32     
-240   240    
2624   4368   
-1584  1168   
-416   -944   
2064   -208   
-1216  -48    
-1168  -80    
304    32     
608    32     
-192   96     
-336   48     
448    -112   
-592   48     
48     64     
96     -96    
-320   64     
-64    128    
-832   -128   
-96    48     
-16    -144   
528    1520   
288    832    
-512   176    
80     -512   
-32    96     
-592   -32    
816    208    
-528   320    
-80    -160   
160    16     
-112   -656   
-32    -304   
-464   -128   
-96    -96    
-112   -32    
224    0      
112    80     
32     960    
416    -80    
-480   -64    
128    -48    
64     96     
16     -272   
368    -400   
-272   16     
-144   256    
208    128    
-400   496    
448    224    
-336   48     
272    704    
160    512    
-240   192    
160    -288   
-528   144    
400    -256   
-208   80     
96     608    
656    -96    
128    -256   
-256   -320   
96     -256   
-208   -400   
-64    -224   
-208   304    
64     240    
-32    -256   
-48    -416   
192    352    
16     160    
-160   0      
-192   -240   
32     432    
-16    560    
-48    256    
-48    480    
48     0      
-416   -48    
288    -128   
-176   160    
-192   32     
-1072  176    
16     -336   
416    -976   
176    -16    
96     192    
48     -48    
-128   352    
224    -336   
-320   -704   
0      -160   
-112   272    
0      -32    
64     272    
-16    32     
272    128    
-400   -64    
-16    288    
112    320    
-32    368    
-48    144    
-320   -96    
672    -160   
-1456  368    
896    -64    
-32    -368   
-176   -368   
-48    304    
-96    176    
48     144    
64     336    
-304   -32    
-320   32     
-16    -96    
0      208    
-256   496    
144    -80    
-96    -176   
-160   -112   
32     -32    
128    -208   
-176   -192   
-160   80     
-240   224    
-80    96     
144    128    
-416   -32    
48     64     
80     128    
-320   160    
320    80     
128    48     
-1696  512    
2400   -240   
-16    -96    
-1536  512    
1024   -112   
768    -624   
-736   480    
336    -1760  
-576   -1184  
-128   -560   
64     1072   
336    16     
-352   240    
-16    144    
160    176    
64     -32    
-128   704    
464    64     
-112   16     
-208   -192   
912    1280   
-1472  -496   
-544   192    
880    -880   
-720   -464   
560    480    
-192   1072   
-512   -160   
384    -400   
-160   -736   
-112   -96    
48     96     
64     272    
128    320    
-176   64     
192    208    
-144   -336   
-48    48     
432    -416   
-304   256    
-224   0      
64     144    
288    896    
-208   1104   
-320   -544   
480    -720   
-80    464    
-112   -48    
-944   -576   
960    -80    
-144   16     
-384   304    
176    -16    
-240   96     
-336   144    
944    -272   
-160   1120   
-400   80     
176    160    
192    416    
480    112    
-576   64     
-48    496    
672    -64    
32     -96    
272    -848   
-752   320    
464    32     
992    736    
-432   640    
256    2064   
832    -256   
-1456  -464   
480    1872   
-16    1088   
64     240    
16     -32    
-256   -336   
-432   -352   
288    400    
-48    -112   
-272   416    
-192   -352   
192    -1184  
208    16     
-128   64     
80     128    
384    128    
-496   1280   
960    1616   
-144   1248   
-256   -16    
464    80     
304    -288   
-432   176    
160    -16    
-16    224    
160    -240   
144    -160   
-64    128    
0      256    
-16    -32    
48     -144   
336    -80    
-48    0      
-128   -48    
16     48     
192    272    
32     160    
96     -32    
-192   192    
464    480    
-240   368    
-336   -432   
496    32     
-176   -112   
-480   -176   
432    -48    
112    -32    
16     0      
-176   64     
288    720    
800    224    
-592   -544   
-176   48     
560    0      
-336   -304   
160    160    
0      -1184  
-336   64     
192    -1152  
48     -16    
128    272    
0      176    
-288   -320   
624    -224   
-16    224    
-128   -192   
400    112    
-128   112    
64     -256   
112    224    
-80    448    
160    144    
80     32     
-48    -608   
-240   320    
176    -1184  
128    32     
-32    16     
848    -720   
-2768  1760   
1472   -32    
112    224    
-144   -288   
128    0      
-144   -240   
-128   224    
208    112    
432    -16    
-352   -176   
-288   160    
224    -144   
496    240    
-656   288    
176    -304   
192    288    
-208   192    
80     64     
112    64     
240    1184   
-800   -560   
-448   240    
1504   -192   
-528   -80    
16     144    
-304   336    
240    -80    
128    32     
272    112    
-448   224    
-112   -16    
-48    320    
608    -144   
-128   -304   
-192   144    
128    -48    
144    304    
32     -144   
-224   208    
128    64     
16     112    
112    -336   
-64    144    
128    -16    
-544   192    
544    -32    
-32    240    
16     -240   
-464   -640   
2368   2288   
-64    -1040  
-1664  400    
624    -448   
-48    192    
368    -304   
-192   144    
320    48     
336    -1984  
-528   224    
272    -48    
144    112    
176    -176   
-80    16     
336    -112   
-272   -32    
288    -128   
0      -656   
96     -32    
208    176    
32     -144   
-448   -96    
1568   -352   
-528   592    
224    -816   
-720   32     
656    -640   
-1136  -48    
304    0      
96     -176   
-224   48     
464    -112   
-96    -144   
-144   -208   
208    352    
176    64     
80     -32    
-128   -144   
-240   -208   
0      176    
128    -96    
240    304    
-288   -192   
-512   368    
912    -80    
-560   -304   
80     -224   
-64    -512   
96     -240   
736    -1088  
-320   112    
80     448    
-240   384    
32     -448   
288    464    
272    -112   
-176   16     
176    160    
-128   0      
-912   -48    
144    -32    
16     -80    
-64    -64    
128    144    
0      -192   
0      -208   
-384   -1120  
400    96     
-96    -96    
96     1392   
832    3376   
400    -48    
-2368  -672   
592    -432   
2032   480    
-1264  384    
-464   -48    
560    288    
16     -64    
-208   -48    
0      -128   
-96    -80    
-240   224    
176    256    
224    160    
-544   96     
112    -400   
0      -112   
48     -592   
-512   -1120  
176    -592   
-560   -80    
16     -128   
464    -160   
-496   -480   
144    128    
-112   -1232  
-16    -224   
96     -320   
48     768    
192    64     
-256   -368   
-32    -208   
112    192    
-80    112    
0      -48    
-320   -464   
208    -144   
192    64     
-160   -208   
288    64     
-144   -448   
-272   -416   
-432   -1936  
192    -400   
0      32     
48     -32    
640    560    
-256   624    
-128   -96    
-144   -224   
-240   96     
1296   -528   
-848   -624   
176    -448   
320    -496   
96     -160   
208    1600   
-576   -912   
352    -624   
-176   608    
-96    -256   
0      80     
-144   -48    
-384   -176   
208    -32    
-80    320    
-80    64     
224    352    
48     -208   
32     16     
128    -224   
176    112    
96     32     
-208   48     
16     48     
48     288    
16     -80    
384    -112   
-288   16     
-96    96     
-336   -208   
224    -528   
-496   320    
-1200  -16    
480    240    
-96    -160   
-576   -128   
16     -240   
-624   64     
-16    144    
64     32     
-32    -208   
-96    16     
80     0      
112    -16    
272    -64    
-640   -368   
-144   240    
-112   128    
-240   -560   
1088   -592   
-640   656    
112    0      
-192   -96    
-208   96     
176    304    
-544   704    
-480   -272   
48     96     
-16    -96    
-336   16     
272    -144   
224    16     
16     144    
-16    208    
-320   112    
-112   128    
288    832    
-128   320    
-272   -144   
128    224    
304    144    
-240   -64    
-112   288    
-176   336    
64     128    
160    -48    
176    0      
-496   -64    
1216   912    
-2224  736    
-656   0      
1424   -544   
-656   -304   
16     992    
96     1840   
-336   -64    
80     -2112  
48     -304   
-416   448    
-16    336    
48     176    
64     304    
64     -288   
-128   -48    
-96    -192   
-176   -560   
-96    -1136  
-64    -816   
-336   -176   
752    1632   
1152   176    
-1376  704    
912    208    
-816   -176   
112    -80    
-16    -352   
720    576    
-288   224    
-64    384    
-96    -144   
320    432    
-320   128    
-80    64     
496    -192   
-576   288    
656    128    
-688   208    
-176   64     
176    -96    
224    64     
-48    -144   
128    1856   
-480   512    
-1008  -96    
768    128    
384    96     
-1312  624    
528    -144   
-128   -128   
64     64     
32     80     
-224   128    
176    -496   
720    -240   
-496   144    
432    528    
224    -240   
-64    192    
-864   288    
144    64     
128    48     
-48    -96    
-304   96     
-96    272    
720    -160   
-176   112    
-576   0      
16     1024   
2016   3552   
-1808  2048   
416    -304   
1488   -400   
-1104  0      
-368   -112   
992    -160   
304    -480   
208    32     
-512   -112   
224    208    
48     -80    
112    256    
0      -48    
16     336    
-272   -128   
128    192    
0      -48    
-336   32     
800    -1056  
-448   -112   
352    -48    
-320   80     
-544   96     
416    -16    
64     128    
-192   -32    
48     112    
-144   -32    
-32    80     
416    16     
-272   128    
-64    112    
496    304    
-400   256    
-32    80     
288    -32    
-208   -720   
32     -32    
48     144    
80     224    
-32    16     
-32    176    
0      -112   
-288   208    
80     -32    
144    -208   
-368   -32    
272    -16    
-80    144    
64     64     
-112   -528   
768    -448   
-496   512    
192    176    
48     208    
-272   48     
-256   64     
352    80     
144    336    
160    48     
-208   160    
256    160    
-112   -80    
-96    48     
208    48     
-48    -160   
-32    -160   
16     240    
32     -48    
-64    240    
-16    64     
160    80     
-224   0      
288    16     
-240   384    
-160   -336   
160    -112   
-160   304    
144    -16    
80     48     
-960   -1088  
1248   -624   
16     -128   
-880   -592   
592    528    
352    -208   
-224   384    
-496   -640   
272    -80    
304    320    
-80    -64    
32     176    
-16    176    
-16    -64    
144    -144   
-48    352    
48     -400   
64     -112   
144    224    
32     144    
64     -1168  
-448   400    
192    80     
-288   -160   
560    80     
-144   -1248  
-304   144    
176    400    
-224   48     
240    96     
48     0      
-16    -64    
-192   384    
208    64     
240    176    
112    384    
-528   192    
-176   192    
592    -224   
-64    16     
-112   -672   
-128   80     
64     144    
32     224    
-144   -16    
368    240    
-288   -16    
160    64     
-48    16     
240    -832   
944    -1392  
-1152  592    
784    -112   
768    -96    
-384   -32    
-912   -848   
544    -224   
544    -688   
-336   -496   
96     64     
-192   304    
48     -208   
80     144    
-112   -320   
192    176    
-64    -80    
32     368    
48     96     
288    -16    
160    96     
-464   -704   
1152   592    
-944   -224   
128    -528   
-176   384    
-80    -176   
272    -80    
368    176    
48     -80    
-256   128    
-80    144    
128    -80    
224    144    
-176   -240   
256    128    
-80    64     
80     48     
160    -368   
-144   464    
224    -1472  
0      128    
240    192    
-112   224    
-544   -16    
-368   -496   
704    -288   
-64    96     
-160   32     
240    -16    
400    336    
-480   -96    
-624   -624   
928    -480   
32     576    
-960   -304   
896    -352   
-96    144    
208    496    
-272   0      
112    176    
128    16     
112    64     
0      48     
-48    -320   
-192   -64    
608    -368   
272    80     
-144   -448   
-16    112    
64     -1008  
-1360  -1632  
320    112    
-128   -48    
160    -656   
640    -144   
288    -1264  
-352   32     
-288   224    
0      176    
352    -640   
-208   -720   
80     144    
-128   432    
384    32     
-16    -704   
128    320    
-336   -16    
256    240    
192    592    
-112   704    
-16    -512   
-32    -464   
80     -1456  
336    -272   
160    496    
-144   112    
176    656    
352    768    
48     -128   
16     -640   
112    -1888  
0      112    
-96    128    
208    -80    
-336   528    
-96    -112   
-16    224    
144    -576   
64     752    
80     -384   
-368   64     
272    400    
48     160    
64     -256   
-192   -208   
528    1312   
-336   1216   
-96    48     
224    -544   
-448   -272   
-256   -288   
-288   48     
1216   -960   
-400   -1168  
-592   -1104  
336    -592   
64     -2080  
224    1392   
112    800    
-400   -1024  
304    -160   
64     416    
48     -512   
112    -320   
-288   -16    
64     320    
496    800    
-256   880    
-144   -256   
576    -352   
-224   96     
384    -752   
-96    -48    
-32    48     
-48    -48    
160    -864   
256    -288   
160    -384   
-240   -16    
-32    176    
336    -16    
-752   -384   
288    -512   
-624   112    
288    -128   
256    0      
96     -464   
-608   -192   
64     -880   
80     224    
-272   144    
192    96     
16     -80    
-48    -160   
32     -368   
-64    -320   
-48    -80    
32     -48    
-224   80     
48     64     
-320   -560   
832    -944   
-336   400    
32     -1360  
16     -112   
-160   -448   
320    -368   
80     -192   
96     -976   
-96    240    
-64    128    
16     0      
112    -16    
-1072  -64    
304    -240   
-80    64     
-128   -128   
-80    400    
592    320    
-400   -496   
-336   -528   
384    176    
208    128    
-112   -144   
16     272    
0      192    
-288   -32    
544    -32    
576    128    
-1008  144    
704    -912   
-1840  -928   
528    -736   
-224   -240   
-128   -128   
64     608    
464    528    
-992   624    
352    -80    
240    128    
-96    -112   
-128   64     
96     -240   
144    16     
32     -160   
-112   128    
192    -16    
-128   384    
272    -48    
-176   96     
-176   128    
-48    848    
2000   -80    
-1008  -256   
-336   -912   
240    -528   
-128   32     
-32    160    
32     32     
240    416    
-768   336    
-576   -320   
480    256    
-896   -224   
-112   16     
-432   176    
336    -64    
80     -16    
-320   128    
80     80     
96     -80    
16     -48    
-272   -704   
-160   288    
160    -288   
-176   304    
-592   336    
-304   400    
-800   848    
560    192    
32     32     
-304   -336   
176    -384   
-848   -208   
-16    448    
352    -64    
-288   368    
96     32     
-64    16     
0      -192   
-160   144    
96     -32    
112    96     
320    0      
-304   -144   
144    0      
336    128    
-208   -64    
-352   48     
672    320    
-1824  -2464  
-1648  -1456  
1360   -32    
48     -48    
-384   -112   
640    640    
-528   -224   
-368   432    
288    -496   
-112   592    
-96    208    
-448   128    
176    -144   
-160   128    
-48    -80    
-496   160    
176    -96    
16     64     
320    -320   
-1008  0      
784    -96    
-528   0      
352    -80    
512    224    
-560   -16    
-368   64     
640    288    
272    16     
-608   -64    
144    128    
160    -128   
64     112    
-432   16     
-224   144    
96     -64    
432    304    
-176   -192   
-208   208    
112    64     
-192   192    
272    -16    
-624   -48    
128    64     
160    32     
-208   80     
-336   -96    
144    64     
128    64     
32     64     
-96    -48    
-128   96     
208    624    
-736   -80    
-48    -464   
-560   -176   
480    -80    
-640   -16    
-240   64     
368    272    
272    128    
-384   96     
64     160    
-112   -64    
112    208    
-208   -32    
-80    -48    
112    528    
-240   192    
-176   -144   
304    144    
16     112    
-160   80     
176    -80    
48     144    
-32    416    
-704   -384   
368    -1072  
-160   160    
16     336    
-288   -320   
96     1008   
-192   -1712  
-1248  528    
1696   -48    
-768   -208   
-400   736    
528    80     
128    80     
-208   -320   
-192   -64    
304    32     
-144   352    
240    -304   
-112   320    
-176   -48    
224    32     
0      224    
0      -208   
-192   176    
144    256    
-80    384    
256    1744   
720    -176   
-1296  0      
640    -320   
-144   160    
160    256    
-80    -384   
224    -336   
-208   192    
288    288    
224    144    
-336   288    
112    -96    
-16    160    
208    80     
-80    -112   
-144   160    
16     160    
-144   224    
16     48     
112    16     
-112   32     
208    -240   
-448   64     
576    224    
-224   32     
-64    96     
208    112    
224    -48    
-416   752    
-1520  -592   
1120   -256   
-704   -64    
832    448    
-80    16     
-480   304    
240    544    
320    208    
16     240    
-272   64     
176    16     
224    32     
-192   -80    
256    -16    
-256   -48    
16     -128   
416    -160   
-352   -112   
16     144    
80     144    
-240   -992   
-272   160    
704    -416   
-288   -640   
-160   -96    
-48    304    
176    16     
-80    128    
320    48     
32     128    
176    80     
-144   48     
-144   -16    
224    160    
32     48     
-128   96     
64     128    
128    -48    
16     192    
144    80     
-112   -48    
160    -128   
496    -64    
160    160    
-16    704    
192    496    
-160   -64    
-720   192    
432    16     
208    -496   
-208   64     
368    -112   
-32    416    
-496   -64    
128    304    
400    192    
-272   -112   
-32    128    
-192   -16    
304    80     
256    32     
-192   160    
-176   96     
256    64     
-352   -992   
192    -1120  
-320   112    
-16    -352   
448    752    
144    720    
64     -1104  
672    960    
800    192    
-1056  -320   
464    448    
400    416    
160    -48    
-240   -880   
-144   -128   
256    -96    
272    320    
-144   224    
-144   -832   
16     96     
352    -688   
-64    -288   
-176   336    
64     160    
224    -128   
-48    -32    
16     416    
0      32     
-288   80     
64     -432   
128    -224   
-240   -160   
112    -32    
-176   -416   
80     16     
256    -1008  
-128   80     
112    48     
32     -32    
-224   -320   
432    112    
-320   256    
128    -1280  
0      -992   
-224   -240   
64     1024   
0      -128   
208    -32    
0      -496   
16     192    
32     -96    
-352   96     
160    -528   
256    336    
32     -496   
-48    224    
464    960    
-752   720    
-160   880    
464    1648   
48     672    
-160   -944   
496    368    
-528   -1392  
256    -448   
320    -144   
96     -48    
-176   -640   
-160   -32    
544    -160   
112    -224   
-16    -368   
-448   64     
112    560    
128    -240   
-128   32     
-160   144    
16     416    
-48    352    
80     144    
0      -320   
144    160    
176    48     
112    320    
-144   176    
16     -32    
624    0      
-1200  768    
736    -592   
-336   -1168  
-128   400    
304    384    
768    96     
-800   192    
-112   448    
304    224    
96     192    
-16    -208   
-48    128    
-304   336    
160    160    
48     -80    
-192   304    
-112   48     
80     -304   
80     112    
-160   608    
112    624    
-384   -928   
-48    16     
208    160    
-48    128    
-112   720    
160    -688   
16     112    
64     -2208  
80     16     
16     256    
32     -1024  
48     128    
96     -2160  
-96    -432   
128    368    
-176   48     
64     208    
-80    -192   
-32    -560   
224    -32    
144    0      
-64    320    
-272   128    
512    -208   
-592   -96    
32     -208   
32     16     
-624   -1264  
1408   -1152  
-448   528    
784    592    
-512   144    
-1072  0      
1536   -112   
-384   496    
-16    272    
-320   -64    
208    -48    
32     -64    
-912   -16    
32     -272   
368    0      
-368   -336   
304    64     
-64    256    
144    352    
96     -1328  
48     -48    
-192   -624   
1040   -272   
-1296  80     
1152   -176   
-48    144    
-912   -176   
224    -224   
272    128    
416    -128   
-144   -48    
-48    96     
-240   -336   
256    -32    
192    -1312  
-192   -64    
-400   96     
432    512    
-176   -112   
304    -272   
-288   -272   
-64    64     
-256   -304   
960    -96    
-336   176    
224    -528   
96     -688   
-272   -544   
432    480    
-224   224    
128    -64    
-272   -1616  
-208   224    
96     -112   
96     80     
144    -192   
224    128    
-464   -16    
256    -96    
512    -208   
0      48     
-864   -128   
224    -32    
240    -96    
224    -416   
-352   -16    
512    -2080  
-432   96     
960    -240   
192    112    
-1776  -1520  
1808   288    
544    -208   
-928   -112   
704    576    
-368   -144   
-608   16     
608    -96    
592    448    
-640   -880   
-16    368    
528    -240   
-48    128    
64     16     
-224   -176   
336    -208   
-48    -32    
-208   32     
144    16     
192    528    
-1168  -48    
896    192    
-160   -288   
96     32     
784    -128   
-1280  -224   
464    -176   
512    32     
-656   -16    
208    -208   
-96    240    
144    -16    
-240   160    
368    32     
-400   -16    
832    -16    
-592   16     
-64    32     
112    272    
320    -208   
-160   -16    
16     -192   
256    128    
-176   112    
208    112    
240    96     
-560   -192   
320    -272   
288    -384   
-32    128    
224    128    
-528   112    
256    -320   
-768   272    
560    -176   
-496   -16    
-672   -608   
-656   -112   
-16    304    
144    224    
-288   320    
-112   112    
-80    16     
96     -160   
96     128    
-160   352    
-240   112    
448    160    
-272   80     
-272   -192   
464    304    
-80    160    
-48    48     
16     -32    
-208   96     
-48    -224   
-576   -208   
96     -64    
-16    208    
-192   -800   
-144   -448   
464    1408   
-928   -672   
464    240    
864    -848   
-960   96     
128    240    
320    -128   
64     224    
-496   -416   
-32    -144   
-304   176    
0      96     
256    -64    
-240   192    
-96    -368   
64     352    
-16    -352   
0      -128   
160    -112   
-256   48     
64     112    
-400   432    
1168   -512   
-784   912    
-464   336    
320    -48    
-144   0      
-144   -624   
-240   -176   
-128   -432   
144    48     
272    32     
16     80     
-368   -144   
48     -16    
-48    -32    
224    224    
-32    112    
0      -16    
-96    64     
-192   176    
544    336    
-288   432    
-80    352    
-352   -320   
176    176    
208    32     
-160   272    
-112   176    
-192   0      
1632   2112   
-1440  80     
-1696  -544   
2080   -32    
-576   -464   
-224   64     
384    96     
-688   -704   
528    -368   
-496   -288   
48     -96    
-208   -144   
96     224    
240    320    
-240   192    
-176   336    
192    -32    
-272   -96    
-336   -144   
144    16     
-128   -32    
-560   -800   
560    -192   
848    -48    
-2336  64     
1008   416    
-864   -1152  
-144   -432   
416    176    
-464   336    
368    16     
-176   80     
32     96     
80     240    
-160   -64    
256    -384   
-64    144    
-272   -320   
224    -272   
144    -256   
96     32     
-304   48     
-48    16     
-416   -1056  
-656   -496   
624    -400   
-208   -272   
32     240    
496    -48    
-416   240    
-336   288    
0      -224   
96     -304   
128    -128   
240    848    
-528   -48    
-80    -240   
384    704    
-272   784    
64     288    
-304   96     
48     304    
192    -64    
160    -192   
-128   -16    
-64    336    
-64    64     
-272   -240   
-64    352    
256    176    
-240   224    
80     2352   
976    -528   
-1280  336    
192    64     
-96    448    
688    1040   
64     64     
-272   -624   
64     704    
-336   416    
464    -464   
-128   544    
-208   64     
-160   128    
320    -32    
288    784    
-336   -96    
-192   464    
208    656    
112    -400   
192    -432   
-208   336    
-512   144    
352    -160   
656    -368   
-496   240    
96     -176   
-880   -1968  
336    -240   
64     240    
-48    96     
160    0      
-64    0      
-16    0      
224    656    
-432   -512   
-528   -288   
400    352    
240    560    
-192   368    
176    368    
-256   -528   
352    192    
0      672    
176    1216   
-592   -864   
128    384    
480    400    
-224   512    
80     -64    
48     944    
48     -160   
-688   -400   
192    -64    
-336   -160   
-64    -64    
544    1168   
-272   2128   
-160   640    
336    -1008  
32     -208   
-176   112    
192    128    
112    192    
-64    -320   
-448   -320   
112    -400   
144    336    
320    480    
-64    -624   
-192   -112   
32     480    
64     -256   
48     -240   
0      -80    
-160   0      
240    960    
16     656    
144    192    
288    -32    
-656   -1968  
-48    -912   
-416   624    
336    1088   
-1088  384    
-64    -304   
176    -608   
-48    -832   
144    -416   
-272   -1776  
0      -160   
80     224    
144    160    
-160   64     
-256   -16    
240    48     
128    384    
48     -64    
-176   208    
48     224    
-128   -528   
176    -656   
-336   -240   
432    -48    
-48    -432   
224    432    
-112   496    
-80    448    
192    128    
48     64     
64     0      
-48    160    
-64    -224   
176    288    
0      80     
-560   368    
528    368    
144    160    
16     112    
96     -512   
32     320    
48     -32    
-144   160    
128    -160   
128    160    
32     48     
-32    256    
16     16     
96     -112   
192    288    
448    -48    
-1344  880    
1344   80     
304    400    
-528   -512   
-832   272    
976    -1056  
-448   -528   
-160   112    
480    -48    
-400   160    
384    0      
-208   32     
304    64     
-192   112    
176    128    
-464   32     
192    80     
48     80     
-208   -208   
48     -496   
1280   528    
-560   64     
464    -64    
-80    0      
112    144    
192    48     
48     352    
352    16     
-208   144    
48     -128   
32     80     
-48    -480   
256    96     
304    -256   
-352   160    
96     -576   
-384   256    
480    -224   
-400   -80    
144    48     
-80    -416   
-1216  112    
1312   320    
992    -272   
-464   -640   
32     416    
-112   208    
-64    352    
640    -160   
400    160    
-400   -128   
-112   336    
240    -416   
-128   -176   
288    0      
-224   144    
-32    64     
576    -80    
528    256    
-624   -112   
-528   480    
848    -176   
208    -16    
368    368    
-1312  320    
608    48     
-384   208    
-480   -656   
2688   3872   
-1040  1408   
-704   -1152  
1712   -944   
-256   -272   
-96    -384   
-656   272    
896    -2448  
320    -480   
-416   -176   
224    0      
-64    48     
-96    96     
448    -928   
-96    32     
-288   -944   
-48    192    
288    -176   
-576   -272   
624    688    
384    -272   
-1008  176    
720    -592   
-848   -224   
688    144    
16     -32    
-272   208    
160    -256   
112    -272   
32     -160   
256    -336   
-224   -48    
176    160    
16     240    
-848   272    
-160   -400   
320    -208   
-48    -384   
-16    -128   
320    0      
16     32     
80     -4416  
-112   16     
320    48     
-432   176    
0      96     
224    160    
-240   -144   
-128   -736   
-544   -704   
160    -208   
-80    -304   
432    -304   
-288   -64    
448    -496   
0      -32    
-64    -1824  
-16    -32    
-64    16     
160    496    
400    304    
-144   128    
-96    -96    
-48    -304   
-48    -288   
176    0      
-272   64     
-16    448    
400    416    
-368   32     
16     -112   
-32    -112   
192    400    
208    -80    
-16    144    
-144   -608   
48     -224   
240    176    
-256   512    
-32    400    
32     64     
-752   16     
1744   -1136  
-1392  -288   
-624   112    
1360   1248   
384    80     
-720   -256   
16     -2016  
304    -64    
-32    -304   
-64    -304   
48     -432   
-80    240    
-32    64     
224    -80    
128    -496   
-224   -160   
-48    192    
80     -32    
16     64     
528    -272   
-1024  1216   
1104   -1824  
-352   400    
64     -848   
-240   -32    
64     -160   
0      112    
208    16     
-32    288    
-112   -80    
32     96     
-32    80     
48     -368   
0      -160   
48     32     
48     48     
208    -224   
-64    176    
368    -256   
-256   -32    
64     32     
-176   -224   
-112   208    
192    144    
-192   336    
16     -288   
-48    -80    
240    64     
208    -16    
-1616  832    
3056   -656   
-768   -464   
-1200  -480   
1392   128    
208    64     
-1152  688    
560    496    
-192   -1312  
-48    -240   
96     416    
96     16     
-320   80     
144    -192   
432    272    
-400   96     
-32    192    
-480   -352   
-32    80     
80     -16    
752    1488   
-1472  -976   
-1776  224    
2496   -768   
-928   -256   
-336   928    
736    192    
-16    -16    
-176   -32    
176    256    
-256   -128   
-224   160    
80     416    
272    368    
-80    256    
-128   96     
192    240    
-608   560    
432    752    
304    96     
-400   144    
-160   -304   
256    96     
-672   -816   
608    688    
-128   1104   
-960   -640   
736    -176   
48     304    
-336   -224   
112    -832   
320    144    
-96    -144   
-432   128    
224    224    
-768   48     
176    672    
544    -768   
-832   -912   
192    64     
-384   -272   
272    -48    
0      -656   
-400   -192   
-176   64     
48     96     
464    224    
-432   32     
-208   -256   
272    144    
-592   -2080  
-1440  16     
544    976    
-208   800    
304    416    
48     960    
-256   1376   
-432   -400   
320    64     
0      -768   
-256   544    
-624   -832   
64     -224   
416    96     
-688   368    
176    336    
-352   -32    
-64    -368   
64     -592   
-96    240    
-80    112    
16     128    
288    112    
-16    -224   
-432   352    
752    -96    
-800   -576   
544    -1168  
-48    288    
192    1456   
-160   624    
-480   -80    
96     16     
32     48     
80     192    
-32    480    
96     384    
-592   -384   
272    -496   
192    -848   
-784   -640   
32     -448   
-96    288    
384    560    
-176   -704   
-400   160    
-32    112    
-112   -224   
160    240    
-240   528    
-208   400    
464    624    
368    -16    
-128   -1072  
-896   1264   
2064   -416   
-1168  -672   
96     -512   
448    -368   
-624   -512   
-400   -112   
-112   -96    
512    -304   
-544   -640   
-192   -400   
144    272    
256    -16    
-160   -48    
16     32     
-288   -96    
176    112    
-16    0      
-176   -304   
240    -32    
-320   -80    
96     272    
-32    896    
352    272    
-144   -320   
-176   160    
-160   -768   
848    -1904  
-736   624    
528    96     
-208   -112   
96     1008   
-256   800    
608    1248   
-656   816    
-64    -64    
-32    -368   
48     -32    
48     -32    
240    384    
-464   608    
112    -256   
-48    32     
160    224    
-144   272    
176    48     
-528   -128   
560    -32    
-288   256    
112    -48    
128    48     
-224   0      
16     -96    
16     240    
432    336    
-592   144    
0      64     
208    -96    
256    144    
-208   176    
-112   48     
64     0      
96     144    
288    80     
-304   336    
-16    -48    
16     144    
384    112    
-96    32     
208    288    
-240   16     
-16    256    
16     32     
256    64     
-32    48     
-304   208    
688    -208   
-2960  -64    
1552   -80    
624    288    
-752   -160   
-208   112    
352    336    
288    -176   
-224   176    
224    32     
160    112    
-16    48     
-112   64     
176    -80    
-320   64     
256    64     
16     160    
48     128    
80     192    
16     -32    
-32    -752   
352    400    
-1584  192    
464    272    
784    992    
192    -176   
-304   368    
288    192    
-720   224    
192    64     
48     -48    
432    96     
-32    16     
-384   224    
256    80     
32     -432   
-112   112    
48     -80    
144    144    
240    560    
-816   144    
288    -32    
624    336    
416    -176   
-496   240    
336    208    
-768   288    
-608   -416   
-128   -128   
-240   400    
672    -128   
144    48     
-48    -64    
-448   128    
112    -16    
336    208    
640    368    
-400   256    
-448   -208   
0      -240   
-240   -48    
160    16     
-128   64     
192    80     
16     64     
-48    -400   
-48    96     
-176   -400   
96     80     
64     -240   
2416   4304   
-1968  1696   
-336   -464   
1648   32     
-288   80     
-464   -16    
208    160    
64     -320   
-272   -80    
-64    64     
352    -16    
0      112    
-192   -208   
416    192    
-352   0      
240    224    
208    64     
48     96     
-112   -128   
592    640    
-128   -144   
-224   112    
160    160    
-368   -64    
-240   16     
592    16     
32     112    
-320   -144   
144    128    
432    -192   
144    80     
-256   64     
-16    16     
192    464    
-144   448    
-320   384    
448    320    
144    160    
-256   0      
-32    288    
176    -144   
208    -48    
-64    -272   
-48    -272   
-384   -480   
-112   -32    
256    -16    
-224   96     
144    144    
176    240    
-352   -256   
-48    -576   
160    -544   
-80    192    
192    560    
208    528    
512    448    
-416   -448   
144    32     
144    -592   
-96    -288   
-320   -224   
544    64     
176    -32    
-400   64     
128    -256   
-128   48     
432    384    
144    256    
-288   48     
-96    -176   
112    0      
128    80     
0      160    
-128   -592   
16     -208   
-32    -544   
80     -592   
160    560    
-16    -768   
64     160    
752    448    
-1616  2128   
960    -256   
192    -336   
64     -512   
-96    736    
-240   -288   
208    400    
-32    -304   
0      -80    
48     160    
80     -1088  
64     -160   
32     -992   
-80    -624   
-144   -272   
160    96     
-16    -480   
160    -544   
0      -240   
464    560    
-384   -160   
-208   -64    
624    -32    
-272   -672   
-160   -176   
320    -752   
-384   -1200  
256    -416   
384    -256   
-288   -144   
-144   -496   
80     -80    
32     240    
224    -224   
0      -736   
-192   0      
-176   160    
384    80     
-64    -160   
-128   16     
-144   -48    
272    -16    
368    48     
-80    -64    
-1248  240    
144    -224   
336    -272   
96     -368   
-336   144    
-640   -1696  
-640   624    
1200   -1536  
-1696  -480   
624    -64    
160    144    
-752   -160   
432    -1056  
320    1296   
-160   48     
-112   -448   
64     96     
-208   -176   
208    16     
256    32     
-112   -400   
-112   -48    
272    -1120  
384    272    
-144   -80    
0      880    
448    -896   
-1296  272    
1168   -240   
-512   816    
448    -320   
-160   368    
416    64     
-448   -512   
-192   -608   
96     -1328  
-352   -800   
160    -432   
32     464    
-304   112    
832    -176   
-336   -560   
-224   -736   
-144   -496   
16     16     
-64    -224   
-16    -288   
-160   -1088  
448    768    
-2176  1104   
-208   -496   
688    -1472  
-16    -992   
-272   -528   
464    -1712  
-384   -144   
-160   272    
448    48     
32     80     
16     -384   
-384   -176   
160    560    
-144   144    
-192   144    
-576   -144   
576    112    
-96    -80    
48     528    
-400   352    
-192   -992   
752    240    
176    144    
176    0      
-592   400    
-240   176    
-368   -1248  
-576   256    
-320   -432   
-592   80     
704    -1136  
-288   -1424  
-480   -704   
-128   -1136  
368    -80    
32     528    
-80    1168   
-512   48     
48     -464   
160    -32    
160    128    
-448   112    
288    112    
208    112    
-112   -96    
-464   336    
208    0      
16     208    
464    -304   
432    576    
-1328  272    
432    176    
-32    16     
144    -288   
-800   -48    
272    -144   
192    -80    
-208   0      
-48    -176   
144    -256   
256    96     
-288   -208   
-464   -176   
-272   -128   
48     128    
-96    -480   
-688   -368   
144    -160   
-16    224    
-16    96     
-816   -112   
-64    0      
-144   -800   
-512   -256   
336    -128   
112    432    
-32    80     
0      320    
128    -352   
-256   48     
16     64     
464    192    
-1024  64     
16     -704   
-80    -576   
112    64     
-432   160    
0      16     
144    96     
-192   64     
96     208    
-96    -48    
-320   -112   
208    -448   
-48    256    
160    352    
-288   -32    
96     208    
-112   288    
-16    0      
320    -64    
-496   16     
-272   -96    
208    16     
-48    32     
-80    64     
0      496    
-448   -2112  
-944   560    
1632   -448   
-1088  -64    
144    -384   
32     320    
240    -96    
384    224    
-384   320    
16     -128   
64     320    
224    -64    
-1088  -208   
-32    -304   
16     256    
160    -176   
-96    432    
272    -16    
-368   0      
-480   -336   
1136   304    
-160   256    
-432   -128   
464    -32    
-528   -192   
112    -96    
224    544    
16     176    
-704   192    
-96    -208   
528    208    
160    -32    
-320   96     
208    64     
-576   384    
192    -64    
128    208    
-48    -176   
-288   64     
144    0      
-336   16     
208    144    
-384   16     
-112   416    
528    -32    
-368   0      
352    16     
-240   -16    
-64    -32    
256    1408   
112    -16    
-704   -16    
400    128    
-288   -48    
-80    96     
144    -96    
176    416    
16     -96    
-288   176    
-1088  -64    
-48    32     
-64    64     
-144   -80    
64     80     
48     0      
-144   128    
80     32     
240    96     
-256   -16    
48     176    
-560   320    
1408   -400   
-1200  -224   
720    432    
320    -16    
-912   176    
528    -192   
112    336    
-16    -48    
224    -16    
176    144    
-96    80     
-96    160    
-48    -32    
272    128    
-32    32     
-256   -96    
-32    80     
80     144    
96     128    
0      -128   
592    -32    
-624   128    
1264   0      
-96    128    
-352   -80    
-304   400    
-576   240    
320    -304   
-192   304    
192    -112   
0      -80    
-256   208    
384    432    
320    48     
32     16     
96     576    
-224   -64    
64     208    
576    48     
-256   48     
-352   0      
128    96     
64     -64    
224    544    
-224   -16    
-240   80     
176    144    
-208   -832   
-352   2176   
1088   -432   
-2336  16     
368    -480   
1120   -208   
-368   272    
-368   400    
-528   464    
608    112    
-176   96     
-96    -64    
0      0      
-240   16     
240    288    
304    80     
-464   416    
-112   48     
256    80     
688    320    
-992   992    
288    320    
-48    -128   
-128   -480   
800    144    
-192   48     
-976   144    
560    -32    
176    480    
-96    64     
-384   -304   
304    -160   
304    16     
-864   -80    
528    -16    
-16    -160   
-48    -528   
-224   -144   
48     -240   
-208   48     
144    80     
96     -32    
-480   -560   
128    -1328  
32     -256   
-64    16     
16     144    
-208   32     
368    -112   
-80    -272   
-464   -336   
0      208    
-128   64     
976    -112   
-240   80     
-304   -48    
416    176    
320    -160   
-96    -912   
-256   -656   
80     512    
96     880    
32     96     
160    -224   
128    48     
16     -384   
0      64     
160    64     
192    -448   
0      -16    
-64    -112   
112    224    
0      64     
256    -592   
32     304    
-192   -960   
112    288    
416    736    
-272   1040   
352    0      
192    112    
-96    128    
-656   1040   
784    -240   
-464   48     
-336   224    
16     -208   
96     -16    
112    -608   
336    16     
32     -816   
-64    256    
112    144    
80     192    
-192   16     
-48    192    
288    -64    
128    32     
32     48     
-16    256    
-144   48     
-304   -624   
1088   -560   
-176   624    
144    64     
-608   848    
336    -256   
112    -880   
-16    624    
240    -160   
-480   208    
64     -352   
688    352    
-64    144    
-224   64     
64     16     
48     96     
-48    -16    
144    -352   
80     256    
64     -688   
-64    416    
192    -208   
96     128    
-96    64     
96     -304   
-304   -320   
160    -144   
-256   384    
576    640    
-80    784    
1584   1136   
-2080  432    
-1360  -688   
2176   -672   
-624   -912   
-720   -112   
96     -592   
-160   -384   
576    -1632  
160    1040   
-192   -208   
-192   416    
160    -256   
384    64     
-224   -352   
-304   -400   
144    -320   
304    -512   
-16    784    
-32    192    
-176   -768   
1296   288    
-1472  -112   
48     288    
896    1712   
-800   1744   
-544   1376   
784    1360   
48     -912   
-704   -400   
544    -480   
-64    80     
-128   -176   
496    80     
-80    -240   
-48    128    
192    -368   
-368   320    
496    -224   
80     16     
-384   144    
128    -1968  
336    -256   
-48    -128   
-864   64     
1040   -752   
-48    -368   
384    -576   
192    624    
32     -640   
-704   128    
80     -448   
64     -64    
656    -48    
-224   -400   
-160   -768   
576    -1584  
-128   -848   
896    -16    
-448   -192   
-32    -48    
160    -496   
304    -336   
-304   -560   
-16    32     
32     256    
448    -48    
448    -32    
80     976    
-912   656    
-624   -1424  
-192   -64    
-448   -160   
-768   16     
1072   48     
-64    -1104  
-544   -144   
576    -224   
112    -352   
-160   -464   
272    288    
-240   -96    
96     -192   
416    -176   
-80    -144   
-304   16     
240    16     
144    -48    
-640   -1264  
-720   -1120  
336    -48    
32     48     
336    144    
-128   -224   
-432   -16    
400    -1104  
-624   -64    
416    80     
-256   432    
272    464    
240    32     
-480   32     
368    -144   
-16    288    
128    -16    
48     208    
-496   -32    
240    224    
144    80     
-112   -16    
-64    -352   
160    160    
-16    -80    
352    64     
288    32     
-96    -96    
-304   32     
240    48     
-96    -160   
48     -224   
-368   -64    
16     -464   
416    -240   
160    16     
-368   -80    
176    -624   
-48    192    
-16    0      
-16    -656   
-416   -176   
224    32     
128    -96    
0      160    
-80    176    
-144   96     
-208   -128   
272    464    
-960   16     
-272   -496   
-256   304    
352    -112   
96     -32    
-112   -1744  
-160   96     
48     160    
128    -176   
32     -144   
64     -80    
-400   64     
48     -16    
-832   -1152  
2112   688    
-464   384    
-1184  -288   
1312   -368   
-768   -80    
96     -288   
176    -208   
320    -464   
-816   176    
240    -160   
48     32     
96     32     
-608   -48    
448    192    
-192   208    
-224   -160   
288    -160   
-48    -32    
-16    16     
192    -208   
-576   304    
1232   -928   
-368   -96    
-784   256    
944    64     
-272   16     
-176   112    
-128   16     
224    -48    
-144   -16    
240    -64    
-208   112    
-128   -288   
176    240    
-288   -160   
-384   384    
640    64     
-640   64     
64     -240   
-288   48     
416    32     
-208   144    
336    16     
-192   -160   
-144   112    
416    -16    
-352   176    
352    -144   
-96    224    
-256   64     
-640   -128   
-416   400    
-368   -208   
464    208    
-928   -112   
-304   -64    
-576   -144   
240    272    
80     -96    
32     -80    
-576   -160   
96     96     
176    32     
-352   16     
128    -96    
-256   -80    
224    64     
-240   224    
-80    208    
32     112    
560    1088   
-1504  -544   
-32    -16    
-304   32     
-304   -80    
432    192    
-224   176    
-208   384    
992    -96    
-384   -176   
-224   0      
-16    96     
96     176    
16     -16    
-16    16     
-400   112    
16     -176   
-48    464    
-560   304    
208    -16    
0      -144   
48     160    
400    -16    
-752   0      
-16    64     
192    -208   
544    32     
-448   224    
-32    -144   
-16    96     
-320   16     
-112   -16    
368    32     
-400   -64    
-368   208    
-1024  80     
624    288    
-560   -96    
-112   240    
560    64     
-320   128    
-48    64     
-176   -64    
176    128    
80     240    
48     160    
208    48     
128    176    
-688   -992   
-528   -1344  
1280   -608   
496    -16    
-2160  128    
32     64     
784    240    
-64    208    
96     208    
-368   -144   
-224   144    
416    0      
288    112    
-480   -80    
-320   96     
208    -240   
544    288    
-320   -144   
-176   240    
0      -96    
352    736    
-80    272    
-272   -64    
80     -400   
-16    80     
-224   -64    
80     96     
-224   176    
-144   64     
272    816    
288    704    
-256   -176   
-608   -608   
240    416    
256    304    
64     -304   
-336   -80    
336    256    
-512   64     
48     976    
224    720    
-336   416    
128    176    
-32    192    
96     144    
-560   -736   
-192   -368   
368    208    
-192   1248   
640    560    
-528   -816   
0      240    
16     16     
640    64     
-448   848    
224    464    
320    208    
-272   -288   
112    -64    
-80    -288   
-256   -144   
304    112    
-112   288    
-112   -112   
16     144    
-112   128    
112    -416   
-288   -752   
-384   -352   
192    368    
16     272    
128    32     
-240   160    
-16    -48    
-16    144    
-48    -192   
-48    128    
-160   -32    
32     128    
32     256    
288    112    
-112   64     
-352   -80    
528    192    
448    320    
-96    80     
-320   320    
224    -384   
384    32     
-192   448    
-176   256    
176    48     
96     -80    
32     0      
208    176    
-336   176    
480    -208   
96     384    
144    592    
-64    272    
-224   -16    
-16    288    
496    912    
-464   224    
16     -96    
624    -240   
-208   -240   
-80    272    
-160   0      
384    -656   
400    0      
-272   496    
-224   80     
16     -368   
144    80     
-16    480    
-336   176    
48     -16    
96     -656   
400    -96    
-160   -256   
-176   0      
96     48     
240    288    
64     688    
64     352    
-176   208    
-80    -80    
672    176    
-112   320    
-256   -176   
-448   -160   
-672   -1488  
64     320    
768    160    
-1360  880    
544    -512   
976    400    
-448   -256   
368    272    
-80    1760   
320    1568   
256    544    
-400   160    
-304   -80    
640    256    
-80    -96    
64     160    
-288   -128   
128    768    
240    688    
112    144    
-192   144    
688    -640   
-1952  -96    
1568   -752   
16     -160   
-608   352    
-352   944    
304    576    
48     752    
-432   -400   
544    176    
-160   32     
-32    0      
-240   0      
368    -240   
-272   32     
32     -2192  
-16    -16    
96     -176   
-32    208    
-48    272    
80     384    
160    288    
-848   64     
-288   -912   
656    -352   
-48    304    
-272   -176   
144    176    
-112   -80    
688    -128   
-272   48     
-208   192    
496    96     
128    0      
-48    -224   
-1120  16     
672    -704   
544    304    
-224   96     
112    400    
-320   80     
-48    -432   
1008   -144   
-480   -128   
224    0      
96     -672   
288    80     
-208   -368   
240    -704   
128    2384   
1424   -144   
-1664  -80    
-256   16     
560    -192   
736    208    
-768   -96    
-208   48     
-48    64     
512    176    
-144   -112   
-144   -400   
-48    -16    
-320   -992   
384    -80    
64     304    
-64    -112   
-96    144    
224    -352   
-704   -32    
704    -96    
-400   304    
432    -80    
-624   64     
144    -96    
-208   64     
288    -192   
0      112    
-80    320    
240    32     
-416   224    
352    -128   
16     208    
128    160    
-224   320    
32     -480   
224    -416   
208    -816   
-128   -48    
352    -224   
-320   128    
-32    -128   
576    32     
-64    -32    
176    80     
-304   96     
160    64     
144    176    
-128   64     
160    144    
-336   -16    
128    -528   
-624   -432   
768    992    
-912   304    
272    320    
400    -32    
-800   240    
368    -640   
-304   96     
368    112    
32     144    
-144   -16    
32     -1168  
-304   -1184  
288    48     
-64    -352   
288    -304   
-176   -96    
-192   64     
336    128    
96     -112   
-64    64     
-32    -176   
-96    -672   
384    64     
-128   -192   
128    96     
-544   -176   
32     -736   
1424   2608   
-2848  -352   
-176   -272   
1552   -784   
-656   -288   
176    -2368  
-672   80     
464    -560   
-112   -96    
256    0      
-240   80     
-32    -368   
64     -96    
-384   -80    
-160   -320   
-192   240    
320    -16    
-160   -128   
80     -448   
192    -128   
-464   -1264  
1056   -432   
-672   416    
288    16     
240    -144   
-432   304    
320    -128   
224    -288   
0      -16    
-80    368    
-944   48     
240    -320   
528    -288   
-240   -112   
-352   128    
416    -160   
-64    48     
112    -1104  
-32    -48    
-432   80     
560    -32    
-144   160    
64     -16    
32     48     
-144   -240   
-32    -128   
-32    -144   
-640   0      
208    0      
192    -144   
-1792  -2480  
-96    -608   
2784   -1904  
-1760  -240   
-576   288    
1408   -144   
-560   -592   
64     -176   
16     -336   
-304   -48    
224    -16    
80     144    
0      -32    
-368   48     
416    -32    
16     -96    
64     0      
96     -32    
64     96     
304    288    
-16    80     
-480   192    
1808   -784   
-832   656    
-624   160    
352    -16    
80     64     
-352   64     
176    -512   
-1056  112    
16     -160   
240    0      
48     -192   
-96    -112   
0      -1712  
-144   192    
128    -208   
384    -224   
-384   448    
80     -384   
-80    48     
192    112    
-1376  384    
736    -944   
0      368    
-576   -272   
240    48     
256    -160   
-224   192    
48     -944   
64     -288   
-112   -48    
0      160    
144    336    
-32    16     
-144   -368   
-864   -240   
480    16     
-368   -224   
-64    272    
528    -48    
-144   -64    
64     -112   
-176   0      
-128   48     
-16    -16    
288    -192   
16     96     
-880   -208   
432    -256   
-176   -3328  
-1520  -400   
656    848    
-96    240    
-288   160    
608    32     
-768   1856   
112    1152   
-48    320    
128    -320   
32     -80    
-128   208    
-560   -32    
-304   128    
-96    -384   
416    -528   
96     -208   
-192   96     
-368   -576   
-304   -544   
16     -176   
64     288    
-224   128    
272    496    
112    864    
112    368    
-208   -80    
-224   96     
-64    -512   
128    48     
-112   496    
160    80     
-512   -576   
-208   -352   
192    48     
-32    -448   
-592   -784   
272    -1056  
-128   -288   
0      160    
-144   -16    
-384   80     
-96    -464   
-80    -1008  
-304   128    
32     1008   
-1808  176    
608    736    
-112   240    
272    528    
-352   64     
-80    768    
736    -368   
-544   -384   
336    400    
384    416    
240    1040   
-320   880    
-16    -672   
-176   -336   
-80    208    
-544   -32    
-176   128    
-64    -144   
384    -32    
0      -432   
32     -48    
208    64     
304    -32    
96     128    
-176   64     
-80    -96    
16     -16    
0      0      
0      32     
16     0      
-240   -112   
320    -448   
96     -144   
-256   176    
64     -48    
-448   1200   
720    -144   
-336   -80    
-112   256    
0      -112   
-128   240    
448    32     
-160   256    
-176   96     
192    64     
32     -128   
32     112    
-720   -160   
128    80     
0      -32    
32     -160   
-16    -384   
176    -832   
-48    -400   
-176   336    
512    -352   
-384   160    
592    -48    
-240   240    
-336   224    
-176   96     
368    384    
176    -560   
-320   -48    
-224   144    
288    0      
-16    240    
0      -128   
208    0      
-208   800    
-304   -368   
160    -928   
384    944    
240    192    
-480   400    
-432   -192   
688    128    
0      208    
-176   240    
-400   160    
496    0      
288    -320   
160    256    
-336   464    
320    -592   
-2224  144    
1392   448    
160    944    
-1152  336    
800    656    
240    16     
-1088  864    
240    848    
256    32     
-32    176    
-96    -48    
-144   48     
-32    208    
432    368    
-128   128    
-80    80     
-176   -32    
208    224    
-16    -32    
-272   176    
384    1200   
1600   160    
-1840  -48    
944    -208   
-208   -192   
-448   304    
1008   -80    
-272   192    
-32    48     
48     128    
144    80     
160    80     
-160   -128   
-144   -48    
416    208    
-272   -32    
-192   48     
336    -80    
0      336    
-160   112    
256    416    
32     -240   
-256   -32    
80     384    
160    336    
-272   -16    
80     16     
-272   -224   
-400   -192   
496    32     
48     176    
-112   288    
384    128    
64     80     
-80    32     
-96    80     
-176   304    
192    16     
-432   336    
368    160    
224    -80    
-80    -96    
-32    144    
-80    0      
-416   -96    
896    80     
-192   160    
-912   112    
160    -1744  
-912   -3936  
-1472  -1104  
64     144    
480    256    
-80    -80    
-128   128    
-672   144    
240    224    
320    96     
-64    176    
-304   0      
80     64     
-304   64     
48     128    
-80    160    
0      128    
-128   64     
160    80     
-64    32     
624    -304   
-720   96     
720    112    
-544   64     
-400   32     
528    128    
640    272    
-784   -32    
512    -1200  
272    -176   
-208   128    
336    96     
-128   128    
96     0      
-224   144    
560    32     
-496   80     
32     128    
128    208    
112    80     
64     -208   
48     160    
-272   -16    
400    -32    
-96    160    
352    224    
-32    128    
-80    -112   
-64    -32    
304    32     
-288   96     
128    80     
176    672    
-96    -16    
-400   304    
416    -240   
-672   -176   
288    272    
144    -336   
16     -192   
-128   -448   
-32    -112   
240    112    
-64    64     
96     -176   
-176   -256   
80     80     
256    816    
416    -96    
-192   512    
-752   672    
800    -192   
224    -16    
-112   -512   
-224   224    
32     -576   
128    -48    
384    0      
64     464    
-384   -256   
80     -64    
48     -16    
1248   2464   
992    320    
-1552  736    
512    224    
-224   48     
368    -32    
-128   -720   
-48    96     
0      -48    
-32    -16    
400    -2016  
-176   0      
-48    80     
-144   288    
432    -336   
-112   160    
128    272    
-336   -48    
112    -96    
128    -96    
-272   -1216  
304    272    
368    400    
-752   -192   
528    208    
48     32     
-112   128    
-368   -944   
416    -64    
224    0      
96     272    
-288   272    
-48    80     
48     16     
32     -48    
128    16     
-256   -112   
-128   96     
352    -768   
-16    128    
96     16     
-112   208    
64     16     
160    224    
-80    208    
-176   240    
352    128    
96     -240   
-272   -208   
624    -624   
368    -1392  
-768   -496   
928    384    
-464   80     
-768   96     
1136   -1328  
-16    -208   
-576   112    
144    32     
192    64     
80     0      
160    240    
-16    -80    
0      -48    
48     112    
112    48     
-272   -80    
-208   -48    
272    -64    
64     80     
32     144    
-16    -640   
-1392  0      
2192   -720   
-192   96     
-512   -144   
720    -608   
-592   16     
560    -640   
-288   -192   
-224   -1088  
176    0      
32     112    
-112   -208   
112    -192   
160    -16    
-96    -656   
336    32     
-112   48     
-112   -384   
-816   -160   
96     -224   
-224   960    
288    -560   
-224   176    
880    96     
-624   -816   
-448   -2192  
816    192    
-224   80     
-160   64     
-16    -64    
-16    0      
-176   -368   
-32    -384   
352    -16    
-576   320    
112    -352   
-192   -416   
-688   304    
-16    -144   
192    -192   
368    -224   
-512   160    
-256   -896   
32     -352   
544    -208   
-480   -320   
-256   -272   
416    -176   
-848   -1744  
-992   -48    
288    720    
-320   192    
576    384    
-400   1248   
-160   800    
32     -304   
512    -288   
-288   -2272  
-448   992    
-112   -416   
0      288    
288    -144   
-128   -48    
-336   64     
208    176    
16     112    
16     352    
16     416    
208    336    
64     -224   
-208   -112   
-96    144    
416    32     
-112   512    
-64    -976   
-272   -672   
256    688    
96     96     
-544   -688   
144    0      
192    -32    
-128   -160   
-272   -832   
208    0      
-80    320    
-352   -864   
-400   -656   
352    -192   
128    480    
80     -208   
-144   208    
-144   160    
128    -368   
-112   -144   
80     384    
-160   512    
-96    -80    
144    -272   
-48    -192   
-960   528    
-64    448    
-80    288    
-80    -784   
-192   -112   
224    -992   
-592   -800   
48     64     
304    112    
-64    320    
-16    96     
-192   -16    
-96    64     
-16    -208   
240    -656   
-96    -208   
96     736    
304    816    
352    -608   
-176   -176   
176    -592   
-64    32     
16     -112   
240    464    
96     528    
-224   736    
272    1200   
128    528    
336    -208   
-720   -528   
416    -1008  
144    768    
256    1072   
-544   976    
192    272    
-320   -768   
224    -80    
16     800    
112    96     
-432   -96    
80     64     
-128   -48    
416    -112   
-32    -144   
32     416    
-736   464    
-1040  -112   
288    240    
-384   -352   
-400   160    
432    -464   
-416   672    
496    -880   
-416   -592   
-224   -160   
256    320    
-368   416    
128    -352   
-16    -336   
-944   320    
64     32     
-192   -112   
-208   272    
-480   -224   
176    64     
176    -96    
-272   -256   
-112   96     
64     -256   
-384   -176   
-112   -64    
160    0      
-128   -128   
576    -48    
-720   -144   
272    192    
-16    0      
0      256    
-160   176    
1520   -80    
-2496  -16    
640    176    
144    64     
-176   16     
-16    -464   
-304   -96    
-32    176    
192    48     
48     -64    
80     48     
-288   0      
112    16     
-48    112    
416    208    
-384   64     
64     16     
176    80     
32     48     
-144   16     
-32    144    
-592   -160   
1552   -432   
-1056  48     
256    176    
64     96     
48     64     
48     -128   
-368   -160   
32     -144   
352    144    
-64    64     
-16    144    
-32    32     
-80    448    
32     -176   
-448   272    
560    688    
-384   576    
-96    208    
-704   -208   
128    80     
352    -400   
-656   240    
128    -128   
-224   -240   
48     -176   
-112   -416   
-656   320    
144    -128   
-112   0      
304    -48    
48     -32    
-448   -160   
-32    256    
144    272    
-368   320    
112    480    
-16    288    
-464   0      
480    -80    
48     -144   
-336   64     
-224   256    
0      -48    
16     112    
672    32     
-432   192    
-720   -80    
928    -80    
-2656  -400   
496    480    
-480   944    
-592   304    
896    -32    
-496   -144   
-64    224    
240    -336   
-32    240    
-48    -352   
160    96     
-112   -240   
80     128    
-16    -16    
-240   160    
368    32     
160    112    
-208   -16    
224    496    
-368   80     
0      464    
800    -96    
-896   96     
32     112    
384    176    
-608   -128   
-48    160    
96     -128   
-160   288    
-64    -112   
-432   -96    
432    -112   
-224   48     
304    48     
-128   -16    
-64    144    
-192   -144   
96     96     
352    64     
-224   16     
64     64     
-176   128    
272    176    
16     96     
128    96     
-96    48     
96     96     
64     224    
-544   96     
496    64     
-32    96     
288    688    
-1072  272    
288    -208   
-64    480    
544    368    
-176   16     
-16    -400   
80     -32    
160    240    
112    176    
-192   80     
-16    160    
256    144    
144    -32    
-256   16     
16     224    
224    80     
224    288    
256    416    
-224   -160   
-176   -272   
96     -80    
-128   16     
32     0      
208    -288   
-352   384    
144    384    
224    64     
-32    -80    
656    2224   
-1584  -656   
352    160    
1440   -1136  
-736   144    
32     592    
-144   -176   
480    -1280  
-80    -608   
80     128    
-240   384    
192    288    
224    32     
-112   224    
192    32     
32     656    
176    80     
-32    400    
96     80     
-240   -32    
144    272    
-80    1344   
736    -208   
-1216  208    
1120   -224   
-448   656    
112    128    
304    64     
-160   336    
-256   16     
112    32     
512    32     
-272   144    
16     80     
-368   -80    
416    -32    
32     -64    
-240   288    
96     64     
160    -1040  
160    -96    
128    128    
48     48     
-128   32     
192    -32    
-16    -96    
-112   112    
96     128    
32     96     
-48    -272   
1472   736    
-2080  304    
208    -1168  
336    -48    
-1008  32     
1600   -144   
-240   336    
-256   -224   
-384   -544   
384    -320   
48     -272   
-304   -96    
288    -80    
32     -560   
-512   -336   
336    -80    
-48    208    
0      432    
304    608    
-48    -64    
-16    256    
-656   -976   
1408   -16    
304    -1440  
-1920  64     
1136   816    
1104   -112   
-544   -2128  
-704   -768   
416    -672   
80     0      
64     96     
-112   -96    
-48    288    
160    -256   
80     -16    
96     -112   
-512   -400   
112    -512   
416    -320   
-400   -256   
368    48     
-160   -112   
64     -832   
-496   -608   
976    672    
-352   512    
-400   32     
-64    -112   
32     -592   
-48    -240   
480    -304   
-256   64     
656    768    
-640   144    
-416   -400   
288    368    
-320   48     
240    -160   
352    208    
-336   -304   
720    32     
32     -272   
-256   240    
-224   16     
336    144    
-160   -752   
-16    96     
224    -1264  
-112   -80    
-160   -256   
640    -944   
544    304    
992    272    
-880   -144   
-640   -304   
848    416    
96     -592   
-256   -432   
-48    544    
64     1008   
272    -912   
384    144    
-176   -224   
32     656    
192    -208   
48     -128   
528    -352   
-80    -80    
-32    416    
48     416    
32     48     
-64    -336   
656    144    
-320   -48    
-64    224    
416    544    
208    176    
-288   784    
-48    -656   
-176   -208   
400    -112   
112    80     
-112   432    
-32    -224   
352    -720   
-128   -2256  
64     -112   
144    -752   
-128   -320   
96     1248   
0      736    
16     192    
80     -624   
-32    -2064  
192    352    
-448   -896   
-64    -432   
96     1488   
224    432    
-320   -192   
16     -1408  
-240   176    
816    720    
352    1168   
-1088  1152   
560    352    
64     -736   
32     -784   
-80    -704   
160    1472   
176    1072   
80     144    
-80    -512   
-64    32     
-16    192    
-96    -320   
256    -400   
-240   -1344  
0      272    
320    -2016  
-176   -16    
208    -672   
48     -448   
-16    -128   
-32    240    
16     -352   
272    112    
64     336    
32     -384   
-1392  144    
688    2400   
1024   -128   
-976   416    
-144   -48    
112    -1552  
-64    -48    
-48    -144   
80     416    
304    512    
-160   464    
224    -448   
-16    -112   
-112   -304   
160    -528   
112    208    
-48    -64    
-208   -32    
160    208    
-32    -128   
-96    -288   
912    816    
-1184  160    
528    -304   
176    -48    
-320   64     
-208   -752   
256    96     
-48    304    
-240   -512   
-144   48     
96     -384   
-112   -48    
192    -208   
-112   176    
176    48     
-48    -80    
144    -336   
-128   160    
144    0      
16     -16    
-256   16     
352    32     
-48    -16    
64     -48    
128    -96    
-480   -16    
16     16     
48     -32    
80     288    
1248   656    
-1600  560    
-368   -672   
1376   144    
-416   32     
-832   -592   
128    48     
352    -192   
-448   112    
16     -208   
304    128    
-288   -16    
48     176    
16     -336   
-144   48     
272    -304   
-144   48     
160    -80    
400    32     
-192   -848   
-16    -160   
400    1008   
-304   -1216  
-1120  208    
720    -96    
-528   144    
-144   -80    
272    64     
304    144    
-464   256    
224    -320   
192    160    
128    -240   
0      224    
-80    64     
96     -48    
-176   32     
16     -272   
-208   -544   
448    0      
80     208    
-96    -96    
-80    80     
432    -272   
-784   -224   
-96    -464   
608    144    
-992   32     
240    144    
-16    -144   
-208   -96    
448    64     
-400   16     
-272   240    
-240   -48    
112    -96    
16     0      
-128   -64    
32     336    
-336   80     
-576   -208   
256    16     
-688   -368   
-192   -144   
192    80     
256    0      
-720   272    
-448   -304   
-208   128    
-48    -688   
2528   1216   
-3264  -624   
448    608    
1280   272    
-576   -128   
-16    -304   
-672   -176   
160    80     
208    288    
-624   0      
144    -80    
144    64     
-960   -192   
144    208    
-208   -144   
-160   96     
128    -32    
0      64     
-160   -400   
464    1200   
48     -192   
-400   112    
240    64     
-368   128    
224    224    
-48    32     
-64    144    
-64    32     
144    352    
-16    272    
-112   -48    
-80    48     
128    -64    
-96    144    
16     -112   
-112   16     
256    32     
32     288    
-240   -112   
80     -96    
144    0      
128    32     
-208   -112   
-128   128    
-208   -16    
256    -32    
-480   -80    
208    288    
48     160    
80     672    
400    176    
-80    704    
-480   16     
-112   160    
496    -320   
-592   -256   
-80    -80    
384    880    
352    816    
32     272    
176    112    
-368   32     
64     112    
-752   80     
-16    368    
-96    -32    
144    -16    
-208   -112   
-224   -384   
0      -544   
-64    -672   
-224   -240   
48     -32    
-128   -32    
-80    32     
16     32     
224    64     
16     800    
-544   256    
-16    224    
32     16     
-592   -1696  
368    -1056  
-896   224    
48     -112   
272    16     
0      -304   
16     288    
-128   -448   
-160   -864   
208    -160   
-224   128    
-32    160    
-496   -48    
208    -48    
-208   -16    
112    272    
-80    80     
-256   48     
-48    -560   
48     16     
528    -80    
-752   928    
288    -304   
-368   -464   
464    688    
-288   304    
-160   -544   
160    144    
160    176    
-112   -128   
-176   368    
-176   288    
208    304    
64     -592   
-272   -64    
-48    224    
192    384    
-144   608    
144    -752   
160    416    
-320   304    
-224   -224   
96     112    
416    208    
-160   240    
-288   160    
-64    80     
416    48     
592    640    
-560   1040   
-1584  848    
2576   -656   
-656   496    
-768   928    
1120   304    
-112   -208   
-32    -240   
64     400    
-224   240    
144    -64    
16     288    
48     320    
-176   -96    
304    208    
0      -240   
-48    16     
16     256    
0      528    
-192   -160   
208    192    
0      640    
416    -576   
-1920  432    
1328   272    
432    -432   
-512   -656   
-192   -1152  
512    -288   
-16    1424   
144    1824   
64     -176   
-640   -736   
304    -208   
272    464    
-384   416    
-320   288    
336    -144   
160    80     
224    144    
-80    288    
-96    432    
272    160    
-128   -64    
-48    -304   
1136   -48    
-160   272    
-656   -528   
624    -1216  
-768   -368   
128    -16    
112    144    
-80    -224   
656    96     
-752   416    
368    976    
-128   64     
-176   -256   
384    -480   
-544   208    
784    144    
-176   -96    
-384   192    
208    272    
-288   368    
224    -224   
-496   416    
112    304    
-192   -80    
112    -144   
112    -16    
640    -208   
-2080  -256   
400    -192   
224    320    
640    800    
-240   944    
-480   -432   
-16    -192   
304    -272   
384    544    
-128   112    
-208   -144   
144    -560   
-32    -496   
-128   528    
224    272    
-16    80     
80     -176   
144    -480   
-208   -544   
-96    -192   
-80    48     
368    304    
400    48     
-496   816    
448    -112   
-384   -240   
288    -48    
208    -336   
-160   -1152  
-656   -944   
256    -192   
304    416    
-112   144    
-144   160    
304    208    
-416   -240   
224    -48    
-48    -224   
-160   -320   
-80    48     
224    32     
-368   432    
176    -672   
-48    -128   
-32    208    
-144   160    
-272   -800   
320    160    
16     352    
32     368    
-496   -496   
352    -448   
320    -624   
-32    256    
-512   192    
288    752    
112    1184   
32     352    
96     -544   
-608   -176   
240    -80    
128    -320   
224    -144   
80     80     
-208   576    
128    -512   
-112   -176   
80     -880   
-432   -624   
80     -112   
48     -304   
112    -16    
-64    -368   
224    416    
384    432    
-416   1296   
368    928    
-160   832    
-144   -64    
400    656    
-272   -1584  
-16    240    
1120   208    
-288   -416   
-224   448    
-96    -848   
320    288    
0      -528   
-208   96     
144    -832   
-128   256    
256    -112   
128    304    
-400   144    
256    160    
-144   304    
96     -544   
16     48     
64     96     
16     240    
80     -1152  
-912   512    
1264   -32    
-1152  64     
192    368    
544    128    
-320   -144   
-272   -240   
128    -256   
400    352    
80     128    
-176   -368   
80     176    
-80    -16    
-64    160    
112    -192   
384    112    
-272   -336   
32     48     
32     -96    
352    32     
-240   144    
256    -2304  
-80    -16    
144    -1760  
16     -608   
112    144    
112    -864   
-192   -80    
288    -896   
-1872  -1600  
1264   96     
-800   -32    
240    336    
1248   -48    
-896   -624   
-208   528    
208    32     
0      -48    
-112   -48    
-176   -208   
16     32     
256    -96    
0      0      
-400   -144   
608    -64    
-384   224    
352    0      
-208   96     
112    -64    
592    528    
-992   -560   
-720   688    
1488   -272   
-1856  96     
1328   -64    
-432   -80    
0      -208   
256    0      
-96    -96    
0      -112   
-16    -2112  
96     -144   
48     -112   
-192   48     
112    -128   
-32    16     
400    -352   
-224   80     
-80    16     
-160   -272   
-496   -304   
-192   16     
-16    48     
-240   -64    
384    -416   
464    -688   
-320   128    
672    -272   
-112   160    
-272   -192   
48     -80    
240    -32    
-336   -272   
368    256    
-144   -192   
96     160    
400    -320   
-304   160    
240    -320   
224    -128   
-32    -416   
-64    224    
144    -2208  
128    176    
96     -48    
-320   16     
-176   -16    
0      -640   
1120   -4272  
-3088  -1696  
1664   1168   
336    -112   
-1648  -112   
96     144    
-304   -112   
64     -16    
-320   -128   
544    -720   
-192   64     
-400   0      
496    96     
-80    48     
-304   -112   
144    16     
96     -32    
-64    0      
224    96     
-656   224    
144    800    
160    256    
-272   -384   
-320   32     
400    -304   
-64    128    
336    -144   
-128   -96    
-272   384    
432    -144   
-272   144    
192    16     
-240   176    
272    192    
-400   496    
512    576    
-208   96     
32     -32    
224    288    
-416   -144   
464    208    
-96    -400   
128    -96    
-32    -384   
-464   -496   
-144   192    
400    944    
208    560    
-256   16     
128    16     
-16    -704   
-224   -752   
-64    -224   
272    656    
-224   112    
480    416    
-64    576    
224    480    
-112   368    
-240   320    
368    272    
96     192    
-176   144    
48     544    
-64    640    
464    352    
48     496    
-96    608    
-192   320    
-176   -1072  
128    -144   
-128   208    
-1040  272    
-48    192    
192    144    
128    432    
-240   -32    
80     736    
48     -112   
48     160    
-208   -112   
-944   448    
688    -576   
176    640    
-912   832    
192    -32    
304    -704   
-96    -128   
-416   112    
240    -336   
-128   -592   
-752   48     
-112   -160   
160    16     
-16    128    
16     -160   
-272   48     
-32    -480   
176    144    
64     -16    
-80    240    
-608   320    
592    144    
-528   -192   
-32    -384   
528    -64    
-16    -32    
-288   208    
-64    496    
-64    192    
112    -416   
-16    80     
-96    -192   
64     272    
-80    64     
96     80     
-192   384    
-16    -64    
0      -288   
-48    -144   
560    64     
-48    32     
-80    208    
-608   -80    
160    128    
-160   -304   
336    -64    
-384   80     
-192   96     
384    80     
-560   -1072  
1952   -1344  
-1024  688    
832    -528   
-160   -240   
-496   -64    
-192   -320   
80     224    
-48    -1008  
-128   400    
-208   -32    
176    704    
224    -144   
-176   16     
-144   -416   
192    800    
0      -112   
-160   224    
-160   -1008  
464    528    
-320   336    
-176   -912   
-976   1376   
2144   -112   
-1472  1520   
768    1120   
-64    192    
-576   -1776  
-992   -2400  
768    -1232  
48     -448   
-224   464    
256    336    
-288   624    
-208   416    
80     176    
176    -176   
-288   -336   
-576   -144   
240    128    
-784   -272   
64     -16    
-32    -128   
-304   -288   
320    -48    
624    -80    
384    496    
320    544    
-192   1952   
640    848    
16     -256   
-144   -192   
288    -64    
-240   -480   
-320   256    
192    432    
-528   48     
-368   -2272  
-576   -240   
192    240    
-416   384    
352    -208   
32     -64    
128    560    
224    336    
-16    592    
160    32     
-336   112    
-192   0      
352    -160   
624    1792   
-896   1120   
784    -544   
1184   -368   
-912   -160   
-16    0      
-144   1712   
1216   656    
0      592    
-1216  -368   
272    144    
592    -128   
256    64     
-656   32     
-112   336    
320    128    
96     16     
-96    -64    
-576   -560   
-96    -1072  
304    -560   
64     -80    
0      512    
-704   48     
544    256    
-48    192    
-96    256    
224    224    
-448   80     
176    352    
352    496    
-32    592    
224    48     
-576   -48    
-272   112    
320    240    
144    -272   
-208   -416   
96     48     
-16    112    
16     -32    
-64    -144   
128    -48    
-32    -160   
-288   -16    
320    80     
144    1088   
272    192    
112    -288   
-224   -160   
32     -160   
544    1152   
-688   688    
-96    16     
0      -112   
-32    0      
112    0      
-80    64     
-368   0      
256    112    
112    64     
16     96     
-32    368    
352    480    
-48    224    
-112   128    
128    224    
112    160    
-336   -240   
448    -80    
-80    144    
-80    -288   
48     240    
80     64     
0      144    
256    -416   
-736   608    
384    224    
-80    -96    
112    400    
224    256    
96     1920   
2336   -400   
-1696  384    
112    0      
400    192    
-208   -416   
-32    -80    
240    432    
-176   -160   
64     80     
272    176    
-96    176    
-96    -176   
240    -144   
32     304    
208    544    
-32    -128   
-128   -64    
64     80     
48     160    
240    -864   
-1072  352    
896    -112   
64     96     
272    32     
-32    32     
-80    416    
-96    -112   
288    32     
32     48     
192    64     
-192   112    
-80    80     
-256   144    
768    -48    
-272   48     
176    -320   
-112   160    
304    -352   
-48    -16    
16     64     
32     16     
-64    112    
384    160    
-576   -112   
384    208    
48     -64    
-240   80     
256    80     
928    1008   
-624   880    
208    80     
208    -32    
64     -288   
208    288    
-672   -1344  
352    544    
384    96     
-176   144    
208    -64    
-208   160    
96     32     
192    176    
80     -32    
-480   80     
608    192    
-80    -96    
-272   208    
352    -640   
-128   64     
224    -1664  
896    32     
-1808  64     
1040   -32    
240    96     
-944   272    
352    -192   
512    112    
-352   0      
-32    -80    
160    224    
32     -96    
-288   32     
448    -48    
-160   64     
-128   -144   
128    192    
128    -368   
80     160    
-304   -16    
32     48     
-240   -560   
-352   304    
480    80     
-272   -144   
64     144    
144    -48    
-224   336    
832    -528   
-352   304    
224    32     
-112   64     
-112   -320   
-48    192    
-80    416    
-528   240    
80     -80    
320    -208   
128    160    
208    -144   
-112   160    
192    -112   
-304   128    
128    -64    
448    384    
-560   -320   
-304   112    
352    -144   
160    -192   
0      -1264  
-256   -1568  
976    960    
928    128    
-1712  0      
208    160    
816    -240   
-288   80     
336    -240   
-608   -416   
384    112    
-48    -128   
112    48     
176    224    
-224   -64    
-96    -144   
0      -1568  
112    -208   
-528   -96    
624    -1664  
-160   304    
-80    -896   
-48    -32    
288    368    
256    -208   
-496   -16    
832    -16    
-160   -176   
240    400    
-432   -112   
192    80     
384    -784   
-336   -224   
-560   -96    
272    192    
576    -80    
-400   80     
368    912    
384    -1040  
-144   336    
96     672    
224    352    
16     128    
-112   160    
160    208    
112    576    
272    672    
-96    -272   
-16    432    
160    896    
64     -96    
-128   -336   
192    -544   
-512   -1184  
112    -816   
-496   -704   
240    -1024  
-48    -2288  
-160   -288   
368    1296   
-240   384    
240    -208   
-144   -128   
192    96     
-192   -528   
-800   208    
160    176    
112    256    
320    -80    
-96    368    
-192   -704   
-32    64     
192    -288   
128    -96    
-176   608    
0      352    
48     -288   
16     -496   
-224   160    
208    -16    
-400   0      
-480   -416   
960    -768   
-400   224    
640    -576   
-560   -352   
-16    32     
96     -1744  
224    336    
64     -240   
-160   -16    
-224   -32    
80     96     
-16    48     
176    144    
-416   32     
304    -32    
-208   48     
96     -160   
48     -112   
48     -32    
608    -48    
-1488  -464   
688    -16    
128    16     
192    -368   
-64    -48    
48     -240   
-192   -192   
48     288    
192    208    
-128   -320   
-496   -416   
288    96     
-272   208    
160    -320   
144    96     
192    -1168  
-80    -496   
0      -944   
96     -112   
32     192    
-208   -64    
-64    0      
480    -256   
-80    128    
-368   -80    
-176   -16    
176    32     
-496   48     
-64    -464   
-1056  -1040  
-112   816    
1936   -16    
-1328  1280   
160    944    
496    48     
16     1456   
-944   128    
80     -880   
96     592    
-112   48     
16     64     
-32    -288   
-112   256    
320    96     
-64    240    
-176   0      
48     128    
-32    1264   
0      176    
144    1408   
-432   -1216  
-1408  208    
1968   -480   
-1008  -624   
240    -768   
-112   -832   
304    -1536  
-832   -944   
0      -1088  
-64    -240   
-688   96     
-160   480    
-96    96     
-976   -352   
-224   176    
-208   -512   
416    -784   
-144   0      
-208   -544   
-320   -240   
-64    128    
-176   -240   
-176   368    
352    -368   
-48    960    
-784   176    
-16    336    
-80    64     
-176   -48    
0      0      
-656   -160   
-32    64     
-128   96     
-224   176    
112    -112   
-64    -48    
64     0      
576    160    
-576   16     
-48    96     
-16    128    
-32    112    
288    -368   
-512   288    
416    112    
-336   -48    
224    16     
-128   432    
-880   1168   
0      3520   
1072   432    
-1472  -128   
-416   -304   
848    -144   
688    208    
-976   -192   
-480   160    
-192   -208   
192    208    
128    -32    
-704   16     
320    224    
-400   48     
128    224    
-320   -48    
-368   16     
352    -64    
-384   -960   
-176   -80    
240    576    
-256   384    
544    208    
400    -32    
-688   80     
336    16     
-96    192    
256    -192   
-512   -32    
112    -128   
-64    96     
192    400    
-304   192    
432    384    
-304   -96    
224    288    
-544   -64    
32     208    
240    176    
-272   96     
64     32     
-32    144    
-160   64     
240    48     
-272   -32    
48     -448   
-352   -96    
-240   -160   
160    544    
224    320    
-256   160    
-224   -864   
-160   -208   
-32    112    
320    -96    
-176   -16    
208    -192   
-160   160    
-96    -16    
-208   96     
96     0      
16     48     
-352   -352   
32     64     
-48    0      
-112   80     
-16    464    
336    496    
64     32     
-608   304    
432    48     
-176   96     
-80    112    
112    -32    
-144   32     
32     -160   
-48    560    
-464   -208   
16     -144   
112    240    
816    2800   
-1664  -1376  
-1328  192    
2096   -192   
-640   -480   
-640   192    
480    288    
416    304    
-400   -112   
144    -64    
-368   272    
32     112    
-96    -32    
0      -32    
-64    -112   
-16    352    
-144   160    
224    -144   
-144   336    
0      48     
-272   -48    
960    816    
368    -112   
-1248  -160   
592    16     
416    -96    
-528   352    
160    -208   
336    0      
-320   224    
144    -144   
128    96     
192    -112   
-128   192    
112    80     
-64    160    
-64    464    
272    112    
-256   240    
400    32     
-160   -48    
0      -160   
176    128    
160    -16    
144    32     
32     64     
-224   256    
96     96     
96     96     
-48    48     
-1088  -320   
496    560    
112    352    
-608   -16    
-112   16     
512    16     
-112   -256   
16     -176   
-192   48     
-192   128    
208    144    
96     48     
-96    80     
80     320    
-192   32     
-208   240    
336    -48    
-368   80     
64     -208   
176    32     
-240   -64    
192    -48    
-1456  352    
992    368    
-160   496    
-448   176    
464    -16    
-112   240    
-240   160    
-496   96     
576    0      
-48    64     
-112   144    
-48    48     
48     96     
-288   112    
272    32     
-48    304    
-80    208    
272    -48    
-48    -32    
48     208    
-368   -224   
1136   368    
-992   112    
-272   64     
608    112    
-224   -80    
-240   160    
128    -80    
-352   144    
400    80     
160    -64    
-48    336    
-352   400    
16     240    
256    384    
-192   -112   
-192   80     
-80    -16    
272    224    
144    -576   
528    64     
-496   176    
224    -96    
208    288    
-64    -752   
-304   288    
96     112    
176    1024   
1712   3120   
-1904  2080   
1088   -256   
1008   -688   
-832   32     
-224   48     
288    112    
528    -448   
-80    176    
96     -384   
-64    240    
-128   -96    
224    288    
80     -16    
-48    32     
176    -32    
-16    -16    
-32    -112   
-32    224    
480    48     
-192   -528   
-304   -448   
-16    -256   
352    656    
-448   112    
-144   256    
560    384    
-240   64     
80     -1104  
-112   -560   
144    -64    
-96    80     
96     -128   
96     -48    
-272   -128   
208    352    
-64    -16    
-224   -176   
192    144    
-64    -608   
-144   448    
416    -224   
48     -304   
512    736    
-560   384    
-96    -1024  
384    -224   
-64    -528   
160    304    
-160   192    
272    -16    
592    1216   
-1136  -592   
-160   -240   
752    784    
-672   960    
112    -480   
-176   64     
176    16     
144    0      
-320   -224   
224    144    
-48    -16    
48     304    
176    704    
-32    0      
336    -240   
64     -48    
-304   -80    
176    -352   
176    160    
-128   -416   
-48    96     
112    -176   
-96    208    
-80    -128   
240    -160   
288    -448   
-32    -48    
0      224    
0      128    
-272   -960   
128    -704   
-544   320    
336    -304   
352    176    
-144   -208   
528    -352   
192    -128   
96     400    
-32    -528   
144    -32    
-80    -48    
-16    192    
48     192    
192    0      
-176   -1648  
48     -224   
48     16     
128    128    
192    192    
-592   896    
912    -32    
-944   -144   
288    -64    
288    -288   
80     -576   
-352   64     
448    -752   
-128   160    
-528   80     
48     -864   
272    -176   
80     -320   
-144   128    
208    -2128  
-16    -48    
112    -64    
-176   288    
432    -784   
-192   -672   
32     -320   
160    32     
416    -160   
-352   -512   
-704   -64    
272    208    
-64    16     
-320   -16    
656    -576   
0      -336   
896    -576   
-1936  160    
1632   432    
688    1344   
-1472  960    
656    48     
240    288    
-128   -1120  
-80    -976   
144    -672   
-80    -352   
320    -192   
-96    -64    
176    48     
-48    -192   
-128   96     
112    -288   
368    208    
-192   -288   
160    144    
0      -928   
-496   464    
1472   -272   
-1424  752    
2432   736    
-832   848    
-864   464    
80     -624   
-416   -416   
384    -208   
96     80     
-96    -528   
-32    -272   
-384   -64    
240    208    
144    -144   
-224   -64    
-224   176    
64     -400   
176    -288   
192    0      
-720   -624   
160    304    
352    -224   
-224   -320   
560    608    
-832   -640   
-960   112    
128    -1104  
288    448    
-80    -160   
-96    -144   
-112   -96    
-400   -160   
160    -208   
864    -640   
160    -16    
336    -320   
-1232  -32    
16     -176   
80     -16    
160    -144   
80     176    
192    -432   
-48    160    
96     -112   
48     -48    
-128   0      
640    864    
512    1232   
-2176  272    
1120   496    
224    -576   
-96    -128   
-176   -64    
-480   -128   
432    208    
-144   -80    
544    -1024  
-224   64     
208    80     
-128   -176   
-64    160    
192    -96    
-352   288    
-256   -128   
-144   80     
160    96     
320    -288   
-400   112    
560    32     
-320   -64    
-624   0      
160    -176   
720    160    
-672   384    
336    144    
-208   80     
352    -176   
-192   16     
-80    -144   
144    48     
48     -176   
-48    288    
368    -208   
-224   160    
768    -320   
-528   176    
384    -48    
-64    64     
-80    0      
528    0      
-400   0      
304    288    
-448   -16    
160    64     
128    -16    
-416   -32    
16     -48    
288    -240   
-112   -48    
64     -384   
-640   464    
832    64     
-688   16     
-448   -64    
160    -144   
-16    128    
-336   80     
48     -96    
-128   -16    
-48    176    
160    -144   
-144   -128   
-64    -64    
96     48     
208    -208   
-224   -560   
-368   112    
320    80     
-352   -16    
208    -16    
64     48     
-144   112    
-240   -64    
-128   240    
96     608    
-352   432    
192    -32    
-16    -208   
704    2000   
1680   -656   
-1680  624    
432    128    
32     -160   
-416   -624   
304    -448   
32     672    
-1104  288    
384    -336   
-416   -224   
-416   112    
0      -160   
240    544    
224    -96    
-160   -32    
32     -352   
-320   176    
48     16     
304    64     
-352   -1504  
-96    160    
176    256    
-528   32     
400    128    
112    0      
-496   0      
64     -432   
208    512    
-208   -208   
160    128    
-16    -144   
-304   336    
416    32     
-336   64     
-48    64     
128    -160   
-368   -320   
336    -160   
-128   96     
-176   -80    
-32    224    
-32    -176   
-48    192    
-112   -352   
-96    128    
368    -64    
-96    80     
-224   64     
304    640    
1200   -32    
-2032  544    
1280   288    
240    256    
-848   32     
144    -240   
432    112    
-496   -704   
32     -16    
-304   -16    
-16    224    
-32    64     
16     176    
-64    208    
528    224    
-432   112    
256    32     
-176   80     
464    400    
64     176    
-112   208    
432    -368   
-1728  -80    
1760   -352   
-160   64     
-384   656    
-144   0      
240    -64    
80     112    
-16    -16    
-432   176    
-224   112    
752    -48    
-208   16     
336    -32    
-576   160    
320    128    
0      -368   
-224   224    
-208   80     
-160   160    
80     336    
-400   -144   
-144   -64    
-272   272    
576    -448   
976    432    
-336   144    
272    224    
-160   0      
-352   -32    
128    208    
-224   240    
-48    112    
240    448    
-512   96     
-112   -560   
688    32     
-176   272    
-592   -464   
496    64     
-32    160    
-112   -240   
304    48     
-32    -48    
304    -64    
32     272    
256    -144   
-336   112    
-112   112    
-1072  960    
-240   256    
48     -480   
-656   -464   
1056   480    
-288   -16    
-928   -1184  
160    -1216  
224    -64    
-176   704    
64     192    
-256   -112   
272    304    
16     192    
16     -80    
224    -592   
-544   -16    
64     352    
304    688    
-48    336    
-16    -16    
-112   -80    
336    -208   
-352   752    
480    752    
-288   976    
384    480    
-464   496    
176    -288   
208    320    
-240   -192   
-256   -144   
112    64     
64     720    
480    992    
-80    320    
-64    -192   
-32    -400   
64     16     
96     800    
-208   224    
-96    176    
128    112    
256    928    
-272   128    
144    -160   
-112   -624   
-80    432    
400    432    
-208   32     
-224   -224   
624    -256   
-976   736    
288    64     
-256   -288   
-208   -528   
-128   928    
304    2032   
160    976    
-64    -272   
96     64     
-96    64     
96     -400   
144    336    
144    320    
-160   256    
-80    192    
-48    272    
-192   0      
176    128    
64     -112   
-112   -208   
-48    64     
80     48     
112    -336   
-64    176    
320    448    
-224   -112   
-48    80     
0      352    
112    160    
-32    880    
288    320    
0      -112   
-240   416    
304    624    
-80    752    
80     416    
256    384    
-112   320    
128    16     
240    64     
-112   208    
-176   304    
144    128    
-176   160    
-80    -240   
288    -176   
128    -32    
-48    -16    
-160   480    
368    -624   
-624   768    
1184   -848   
-640   384    
-192   784    
-80    272    
192    544    
144    144    
352    -768   
-512   -560   
144    448    
144    592    
256    -720   
128    768    
-624   -368   
272    224    
384    -448   
224    -256   
-288   208    
-96    -736   
144    144    
176    352    
352    -48    
-272   -144   
-256   -32    
384    64     
160    240    
-176   -64    
272    192    
-208   -1184  
-1408  -368   
1248   -224   
-864   80     
768    336    
-512   -432   
240    -32    
48     -704   
-256   352    
192    0      
208    192    
-112   0      
-32    96     
16     48     
272    -32    
32     144    
-160   -160   
336    112    
-32    -656   
-96    16     
80     -416   
144    -16    
-1392  1184   
1152   -16    
-384   496    
384    -384   
-160   -416   
240    304    
-912   336    
608    -144   
-16    16     
-176   -512   
224    96     
-80    -336   
-48    144    
416    -240   
-256   128    
64     48     
-208   -16    
320    272    
576    128    
-128   464    
-96    -192   
-192   448    
-16    -768   
128    -432   
176    -304   
384    -560   
224    -176   
-464   512    
16     -128   
-96    192    
320    -224   
400    0      
-48    -320   
-144   160    
416    432    
448    -272   
16     -256   
448    -208   
-288   -32    
368    -112   
576    496    
-432   -80    
-112   96     
256    -224   
912    -224   
-336   160    
-112   -128   
848    320    
-1184  -1808  
-2304  -1072  
96     -912   
-112   -528   
-192   -304   
-224   16     
160    -128   
-272   -688   
352    -128   
-48    48     
-48    -48    
160    -1104  
-112   0      
0      32     
-192   -128   
416    -192   
-112   -16    
-640   -64    
368    256    
-192   -128   
-112   32     
848    -128   
-640   -640   
-512   -320   
-304   -32    
448    144    
48     192    
64     -48    
-208   -208   
32     80     
368    -80    
-80    64     
-48    128    
-208   176    
-176   -432   
256    -16    
288    -48    
-496   -352   
896    -192   
-256   -928   
224    128    
-112   -48    
-128   128    
368    -352   
-112   96     
-16    -288   
-544   -528   
-80    -240   
160    -64    
-352   224    
-160   160    
320    1280   
-544   448    
192    16     
32     -592   
-544   32     
240    0      
464    96     
48     336    
-208   224    
144    80     
208    -224   
-336   -48    
16     -224   
-224   -16    
64     -32    
64     -64    
-176   -128   
208    -112   
-208   -608   
176    304    
432    -1472  
-176   48     
-240   384    
208    272    
176    128    
96     48     
-400   -144   
32     160    
48     0      
-16    272    
-752   2208   
1952   -688   
-2208  384    
624    -352   
512    80     
-192   -448   
-144   64     
-112   -544   
560    -896   
-272   384    
176    176    
64     -16    
-64    112    
-48    -544   
224    -304   
-528   208    
192    -48    
-16    176    
80     144    
112    128    
-96    -1376  
-32    416    
272    192    
-896   -288   
144    -144   
192    16     
32     432    
-240   496    
0      -112   
176    96     
-144   64     
-48    -144   
176    448    
288    -112   
-384   176    
80     -288   
-64    112    
-32    160    
112    400    
16     16     
-144   -64    
-64    -48    
112    0      
80     112    
-128   -80    
-224   192    
320    -432   
32     176    
-176   -528   
-208   -1616  
2560   -32    
-1552  1088   
-688   -400   
1360   -112   
-944   -320   
48     192    
320    352    
320    320    
-128   -112   
-272   128    
336    128    
-224   -176   
-48    64     
-784   96     
560    400    
-544   16     
-80    32     
-48    -16    
128    64     
-288   -128   
-288   -480   
-1216  992    
1040   -496   
-624   -240   
432    -320   
-112   -336   
-32    -400   
224    -336   
-128   112    
-96    -48    
160    -16    
-272   -16    
-192   144    
176    160    
416    128    
-512   16     
-96    368    
-848   256    
96     -272   
-176   -192   
-112   48     
-64    -48    
-208   192    
-320   48     
224    -112   
-528   288    
-144   1008   
960    -16    
-368   -16    
64     0      
-96    80     
128    496    
-80    -48    
208    -416   
-208   -272   
784    496    
16     448    
464    80     
160    64     
-304   16     
32     176    
144    80     
224    112    
-80    64     
432    1024   
-848   944    
16     32     
-64    448    
480    416    
-368   128    
-1408  1360   
144    -960   
400    -64    
-736   1120   
1200   1168   
-80    592    
-560   176    
64     240    
96     -720   
384    256    
-240   64     
-288   336    
-144   -64    
336    112    
-64    48     
80     -256   
-32    -512   
48     320    
336    288    
-112   1040   
-64    -272   
16     -368   
-384   64     
144    -304   
96     -272   
192    704    
112    -1008  
-256   16     
-112   976    
-192   -800   
96     112    
-224   -32    
-288   -112   
-144   -448   
-368   -592   
256    176    
128    -112   
-80    416    
-48    -272   
240    -112   
-112   192    
-32    -304   
-384   -960   
144    -496   
-672   -976   
-32    -304   
-704   432    
-656   -1376  
192    -64    
176    -416   
-128   512    
80     -416   
-944   -96    
752    -1040  
-464   -736   
-384   -256   
-336   176    
320    -576   
-224   -80    
-112   480    
32     272    
-224   -160   
208    32     
320    272    
-304   160    
144    -160   
208    -48    
-432   -64    
224    80     
-96    128    
-272   80     
32     -16    
320    16     
-288   512    
16     1216   
-240   736    
96     976    
112    80     
-224   -400   
384    -352   
400    240    
-1776  752    
1056   -928   
320    -624   
368    -416   
240    -304   
-416   336    
80     624    
-32    192    
272    -480   
-48    224    
-192   -176   
-80    160    
288    96     
144    -112   
-64    432    
32     400    
-80    304    
160    -320   
128    16     
368    -176   
-1120  896    
784    -1008  
-64    768    
64     176    
-336   -768   
128    160    
128    128    
-16    128    
80     -352   
-48    -48    
16     -144   
112    480    
192    -64    
-80    -48    
-16    64     
-96    496    
336    320    
-64    208    
32     256    
80     80     
-80    256    
-272   176    
176    80     
-80    160    
304    256    
96     48     
-80    128    
208    48     
-368   -1088  
752    208    
416    -32    
-1040  -288   
896    224    
32     -112   
-672   656    
848    880    
-64    480    
-32    16     
0      144    
-64    64     
64     -16    
80     128    
160    64     
-432   112    
352    64     
-64    336    
-224   -128   
160    -224   
160    -80    
-64    192    
-672   -688   
1088   -80    
80     -304   
-864   240    
864    176    
-208   64     
176    608    
-400   16     
-240   32     
224    160    
80     48     
-192   -128   
-240   -224   
592    160    
-48    -144   
16     240    
-496   352    
272    112    
48     80     
-256   32     
-336   -704   
496    304    
-48    64     
-240   -64    
528    576    
-320   384    
400    -112   
528    416    
432    160    
-640   -512   
-16    96     
192    -80    
-256   32     
448    528    
-96    176    
256    48     
-176   64     
-192   -832   
176    256    
-64    -32    
-368   128    
-64    144    
256    -240   
576    576    
-400   -256   
-304   176    
-368   -48    
272    -16    
-432   1088   
2560   1040   
-304   -656   
-1472  80     
1216   128    
-432   -64    
0      64     
192    0      
32     288    
-208   -240   
176    208    
304    -128   
32     32     
48     -144   
-352   128    
128    -224   
160    256    
96     -64    
-256   64     
688    112    
-1232  -48    
976    208    
-464   -176   
592    -32    
-96    -272   
-288   176    
816    128    
-1072  32     
560    -1712  
208    160    
-32    -1376  
-160   160    
96     -32    
-240   80     
528    144    
-496   80     
432    432    
-224   64     
-192   400    
16     -48    
-80    64     
256    -176   
-112   288    
-64    -288   
208    -48    
-64    -512   
-16    304    
-64    160    
224    224    
144    48     
-144   272    
288    272    
-112   224    
704    -144   
-464   -864   
-160   208    
448    -192   
0      -64    
160    352    
-480   480    
144    48     
192    48     
-64    -48    
32     144    
48     240    
128    208    
32     192    
-208   32     
112    -208   
-96    -768   
96     -352   
-80    -128   
160    432    
-400   192    
208    16     
176    -144   
112    16     
-256   -656   
112    -1216  
-160   -320   
96     -336   
1024   576    
-2672  1216   
1488   -720   
16     -816   
-192   -112   
192    224    
-304   -96    
64     -752   
16     -752   
320    -208   
-352   -736   
-80    -128   
368    -128   
48     -544   
-704   -432   
96     -624   
192    496    
160    -112   
-64    -48    
-32    -1712  
-256   -640   
288    -1280  
288    -272   
192    672    
208    704    
-256   -416   
-32    -576   
256    -112   
-48    112    
-272   32     
-48    -288   
32     -64    
-64    32     
208    -144   
-176   -592   
-80    -208   
384    416    
32     176    
-16    128    
64     -144   
144    -352   
-144   192    
-32    32     
128    -128   
-160   96     
160    -96    
-80    -176   
208    336    
16     0      
-32    -384   
176    -1376  
-1392  -256   
1152   -336   
-1040  -384   
-176   192    
208    -160   
-736   1760   
496    1216   
16     -432   
-144   -528   
160    -240   
-576   16     
224    -256   
-272   144    
256    176    
288    352    
-224   -576   
96     640    
288    -256   
-400   -688   
-96    -1072  
1440   768    
-736   -16    
-752   -1488  
736    -720   
-176   912    
-416   896    
336    384    
32     96     
-80    -256   
-416   -448   
304    -1008  
0      144    
-208   -1824  
272    -64    
-144   -64    
-48    48     
176    -320   
-384   -304   
-272   -480   
80     -192   
160    -400   
112    224    
-2160  -1216  
16     -672   
224    128    
64     -256   
-224   -48    
384    672    
-32    1680   
-384   32     
784    -48    
-176   384    
-528   -64    
432    432    
592    560    
-16    288    
16     160    
-1104  160    
624    0      
-480   464    
240    176    
96     192    
192    -816   
-48    576    
-176   -80    
-384   128    
704    160    
-352   816    
-224   -176   
-64    -1264  
1568   -1920  
352    -688   
-864   1024   
176    480    
-240   1232   
512    -512   
-160   256    
-160   1200   
-224   -16    
-320   -240   
512    224    
80     224    
-224   672    
-224   -304   
32     400    
-16    656    
208    -80    
-80    -288   
-16    -272   
0      480    
-976   -304   
-16    -96    
-976   208    
288    256    
-704   0      
112    -480   
320    -144   
-160   1200   
32     160    
0      -320   
64     -416   
432    224    
-304   -704   
-464   -304   
-48    96     
-320   80     
160    784    
176    736    
-560   -32    
-160   -80    
176    80     
-64    16     
-1008  -224   
16     672    
224    992    
-176   304    
336    -512   
-48    -688   
-272   -576   
64     672    
352    -528   
-1152  -128   
528    608    
592    -192   
-608   -192   
192    304    
400    -464   
-304   -1136  
-224   -128   
-64    208    
-128   320    
64     560    
144    512    
-304   272    
160    -80    
144    -80    
-240   272    
224    160    
-32    -192   
-48    -32    
224    -32    
-208   16     
-208   -144   
112    32     
32     208    
192    64     
-112   -96    
96     176    
16     -176   
-272   192    
1008   2048   
816    272    
-1008  1328   
880    96     
-592   -512   
208    -256   
-64    -416   
96     192    
-544   416    
96     432    
368    80     
-304   32     
-32    -96    
0      -576   
112    -96    
160    144    
272    400    
-416   384    
-48    288    
128    96     
-80    -1216  
48     -256   
32     288    
-592   336    
752    224    
-128   512    
-112   -96    
-128   -80    
-192   -160   
320    -128   
-32    144    
0      352    
48     128    
-144   -80    
208    96     
-32    -64    
-32    336    
-144   -128   
128    16     
-16    -160   
-48    96     
-176   48     
-160   64     
448    96     
-112   -128   
-576   0      
320    144    
-208   48     
-176   48     
592    1312   
2096   480    
-2240  432    
-768   -928   
2032   240    
-944   -176   
-1520  784    
1184   448    
-192   496    
-576   -224   
256    128    
-64    -16    
128    112    
-64    112    
-160   128    
112    208    
32     144    
-224   -128   
-128   -112   
432    288    
64     -16    
-336   -208   
992    704    
720    -16    
-1136  80     
-336   0      
592    128    
-464   -208   
0      -160   
624    96     
-416   208    
16     16     
-16    32     
-80    112    
-128   -320   
-48    96     
416    144    
-656   -464   
464    -208   
-112   -48    
-256   144    
144    112    
192    400    
-1072  48     
1104   32     
-272   -128   
144    32     
-208   -128   
-32    320    
192    -96    
256    384    
-224   208    
-192   -304   
336    -112   
64     80     
96     -32    
-16    1168   
96     -336   
432    -960   
-80    384    
64     448    
176    -96    
-48    112    
160    64     
0      80     
176    624    
-400   -80    
-368   208    
768    32     
-32    128    
-1824  -1376  
3168   -2096  
-576   800    
-480   96     
560    352    
-576   160    
-208   -240   
1008   320    
-112   -416   
-1104  64     
64     32     
368    208    
464    48     
-448   32     
-272   80     
-64    0      
512    112    
16     -80    
-192   160    
176    -400   
-736   16     
816    -288   
-560   224    
592    -80    
64     -32    
-208   -16    
320    -1584  
-416   96     
464    288    
-464   480    
384    336    
16     176    
-32    144    
-240   192    
160    256    
160    272    
-64    416    
-64    416    
-144   544    
0      0      
16     0      
-64    -704   
96     -32    
-528   192    
496    384    
144    336    
-176   16     
-128   48     
352    320    
96     112    
-256   96     
192    160    
112    832    
464    -192   
-640   -1168  
224    -608   
-128   -176   
32     176    
288    -560   
-64    -48    
-416   336    
112    272    
32     128    
176    128    
176    464    
16     144    
64     96     
-80    256    
80     -112   
-128   -80    
-112   -224   
-16    -496   
240    1296   
112    -224   
-608   -144   
80     -144   
128    576    
560    96     
-304   -688   
-240   -528   
160    448    
848    1408   
-1136  -112   
144    -416   
1040   1248   
-720   224    
-224   -144   
256    -912   
256    816    
-112   -480   
160    240    
192    -112   
-32    32     
256    96     
-80    -144   
-128   -48    
160    16     
144    256    
-16    48     
32     -304   
64     80     
448    496    
-688   304    
448    -624   
800    736    
-256   -48    
-576   -176   
-192   -224   
624    720    
-352   192    
-176   -416   
192    432    
240    -48    
-80    160    
112    16     
-256   -112   
80     80     
240    -112   
-192   32     
-192   832    
-192   -288   
528    -80    
144    112    
-288   -176   
-112   224    
496    -192   
-256   -272   
352    -176   
-64    272    
-160   144    
224    -48    
880    -880   
-3664  -480   
496    -96    
1408   -16    
-1024  -992   
-144   528    
48     -528   
-432   -128   
240    416    
368    -224   
-144   112    
-304   -368   
160    176    
80     -240   
-80    -48    
-80    80     
160    48     
16     -640   
272    -144   
240    -144   
-448   -400   
1328   -144   
-1232  256    
768    -640   
-448   -416   
-112   -368   
624    272    
-480   -16    
32     -1328  
112    -768   
-160   256    
160    1040   
128    368    
192    -128   
192    528    
432    464    
-368   240    
288    -2640  
-608   176    
256    -1312  
512    368    
-256   -144   
528    -448   
16     736    
-528   -432   
96     -320   
144    -96    
816    960    
816    1168   
-288   -176   
32     -1040  
48     -608   
-64    -176   
-144   -368   
560    704    
448    -320   
-704   -1216  
736    -1200  
-432   -400   
528    -16    
160    64     
-144   -304   
48     -592   
-96    -16    
144    -48    
-112   80     
-128   16     
-144   672    
160    656    
-208   336    
992    752    
-2112  16     
448    -256   
368    -1136  
-528   -240   
-304   256    
-304   -816   
544    1712   
560    928    
-576   -240   
-224   -1024  
512    272    
32     48     
-128   752    
-400   32     
-368   -48    
352    176    
-96    64     
16     128    
-912   -1216  
464    -960   
320    -624   
-480   64     
160    -912   
224    528    
-64    -480   
288    -592   
32     -352   
80     -320   
-128   -240   
-32    192    
16     352    
-96    -32    
-1136  -128   
128    16     
-32    400    
16     128    
-192   448    
192    208    
-16    528    
-96    352    
240    208    
-32    -160   
304    -32    
-96    -96    
192    304    
-288   112    
176    -672   
-256   -288   
-128   32     
80     256    
-368   -944   
-144   -16    
864    -432   
-496   432    
208    -992   
64     -144   
-352   -320   
64     -384   
-512   -128   
432    -144   
-16    -32    
0      -176   
-512   -464   
160    -112   
0      496    
-16    32     
176    512    
-272   -208   
80     176    
-80    32     
0      -48    
-96    -160   
112    -160   
48     160    
192    64     
-928   64     
288    256    
256    -48    
-64    -288   
256    1568   
-1184  -1168  
224    32     
1008   -240   
-480   -32    
-80    -176   
-96    0      
256    80     
-352   -432   
-208   32     
160    160    
-144   32     
368    80     
-240   -192   
-16    -336   
-592   400    
-496   224    
384    -80    
-112   -288   
16     -288   
-16    80     
192    1456   
720    -192   
-800   -176   
640    -64    
-48    -272   
-128   304    
176    80     
80     240    
-368   -96    
32     32     
192    -96    
-80    256    
-256   -320   
-32    128    
-208   -48    
-96    16     
16     -32    
-320   224    
16     0      
-1216  16     
320    32     
48     80     
96     112    
-368   -192   
560    112    
-448   -448   
48     240    
384    -208   
-368   32     
-336   -400   
16     576    
-352   240    
-320   -144   
48     -80    
80     160    
-208   -16    
432    192    
16     0      
-320   -80    
352    192    
-496   -144   
352    160    
96     -48    
-688   -112   
368    224    
144    32     
-320   -32    
-144   -208   
-32    -48    
-320   16     
496    752    
-2240  -256   
48     -16    
1088   -32    
-2352  0      
960    0      
144    -272   
-576   -112   
432    128    
-32    -48    
48     32     
48     176    
-176   -48    
-112   144    
-448   -80    
208    0      
-624   -128   
-176   -224   
192    -272   
528    80     
-464   -224   
784    640    
624    -224   
-848   96     
736    -144   
-384   528    
-176   400    
-224   576    
448    -112   
-208   -176   
480    32     
-160   416    
192    176    
144    624    
-512   -48    
-272   96     
448    -48    
-432   0      
496    400    
-64    -32    
-80    112    
320    64     
-352   -48    
0      -32    
304    272    
160    -80    
-352   48     
304    16     
-688   -80    
-928   -4112  
-1376  -256   
2480   848    
-576   -80    
112    416    
32     192    
-384   144    
112    -16    
-96    -48    
288    -208   
-208   256    
176    32     
-144   16     
16     144    
-48    -176   
288    128    
-144   80     
-272   32     
-16    0      
304    -1200  
32     672    
192    608    
-256   160    
-416   -64    
736    -96    
-416   -112   
320    -96    
-96    80     
-224   240    
224    464    
32     80     
128    32     
-64    192    
176    128    
-160   -64    
-416   -480   
496    -304   
-112   512    
208    288    
-144   144    
-16    0      
240    400    
-816   -288   
560    112    
112    144    
-400   96     
464    80     
-128   0      
16     -272   
-240   -768   
-240   -368   
400    -208   
-832   192    
736    272    
-736   384    
256    -256   
192    176    
-192   1200   
-64    1136   
32     544    
48     784    
128    496    
128    144    
-96    -256   
-128   16     
256    480    
-112   160    
48     -256   
-48    160    
-32    144    
128    -32    
-80    -432   
48     -80    
144    -48    
0      -160   
64     160    
496    352    
-512   288    
336    64     
192    -16    
-144   32     
384    208    
-928   480    
368    64     
208    96     
-48    32     
16     -128   
-432   864    
288    432    
-400   112    
-80    0      
64     96     
-112   112    
0      -32    
-96    256    
176    32     
-128   -192   
-224   -336   
336    -32    
208    -176   
32     16     
-784   624    
736    -80    
-736   48     
320    208    
16     368    
-128   128    
128    176    
-224   96     
176    -16    
96     -48    
64     176    
-176   272    
-112   -128   
368    -400   
64     192    
192    384    
16     0      
-368   -320   
64     384    
304    208    
-272   112    
-96    32     
16     32     
32     0      
48     -32    
112    96     
-96    -64    
64     -144   
-80    176    
-496   -928   
2176   -672   
-96    1184   
-688   -1424  
976    384    
-272   992    
-304   112    
1376   384    
-672   1600   
176    576    
-112   1008   
320    -736   
288    288    
192    -304   
-432   64     
0      -80    
272    256    
176    -384   
160    -768   
-160   176    
144    144    
-128   -1056  
-992   1104   
1856   -368   
-816   880    
704    352    
192    -464   
-864   -1232  
48     -288   
304    384    
-112   224    
288    160    
-208   -240   
80     -288   
64     -400   
128    -144   
224    -32    
-112   832    
576    1024   
96     768    
-208   -16    
80     16     
-144   -96    
240    -304   
-432   -96    
368    1136   
-448   336    
688    1584   
-1328  1056   
-80    736    
608    -688   
-368   -32    
336    288    
-304   176    
-176   -224   
512    848    
736    -512   
-16    192    
-544   624    
-160   -176   
752    480    
336    -48    
-400   -128   
192    -192   
160    224    
544    640    
-512   416    
-464   -368   
640    -144   
336    -1152  
-928   -1456  
1280   -1392  
1248   304    
-1248  -304   
-128   -1312  
-224   -624   
656    -336   
-64    464    
-592   192    
224    256    
160    -224   
0      160    
-96    48     
-128   672    
256    -1968  
256    128    
-176   -112   
128    240    
-128   -112   
464    944    
192    -576   
-320   -1152  
128    -288   
176    -288   
-256   32     
128    -16    
256    -208   
-160   -1056  
-96    -112   
400    32     
-192   224    
96     32     
-64    160    
112    144    
208    176    
-272   -32    
32     224    
416    1008   
-112   368    
240    352    
160    -224   
-80    176    
368    256    
-416   192    
-240   96     
480    128    
-192   -240   
-112   -1040  
160    -144   
-64    -208   
224    0      
-192   -384   
464    -144   
304    112    
-368   -176   
320    16     
-112   128    
-208   -240   
368    128    
-144   -80    
144    -272   
-208   288    
176    -112   
240    -816   
-160   96     
-64    -512   
368    -752   
-160   -2176  
0      -608   
368    -464   
-368   240    
64     -16    
272    -16    
-32    -192   
64     256    
32     -80    
-208   -480   
64     -256   
64     112    
-1136  -32    
96     -224   
144    -2160  
-1632  1056   
1600   64     
-496   -256   
400    -80    
112    -112   
-336   -352   
-336   -688   
560    432    
224    -128   
-240   48     
-400   144    
144    -208   
64     -160   
-432   240    
16     -400   
256    -16    
-272   192    
208    -304   
64     32     
608    -128   
-1392  48     
-16    -112   
1312   96     
-624   -48    
208    112    
-592   176    
224    -272   
-240   0      
528    -112   
-560   112    
-128   -320   
-144   160    
752    -896   
-176   -128   
-176   -832   
128    160    
96     176    
80     -32    
-240   -16    
128    -80    
-192   0      
160    48     
-208   0      
128    -112   
-1984  -32    
512    -144   
-48    -144   
32     -16    
-560   -944   
2544   2432   
592    -928   
-2032  -128   
432    -336   
336    0      
192    -96    
-208   16     
432    480    
208    -16    
-576   64     
144    -80    
336    16     
-192   -48    
-160   96     
464    112    
-336   -528   
176    0      
48     -2432  
80     208    
160    96     
80     176    
-672   16     
1440   -576   
-640   288    
304    -896   
-816   272    
656    -320   
-784   144    
224    -256   
160    -160   
-192   -368   
448    -16    
-64    -832   
-192   -32    
144    240    
272    -48    
-160   -32    
-112   -288   
-368   -96    
64     128    
128    32     
144    160    
-320   -128   
-576   32     
944    48     
-496   -288   
-16    128    
32     -560   
48     -432   
480    16     
-208   64     
-96    432    
-80    224    
-48    -80    
144    448    
352    -288   
-240   -192   
256    144    
-80    -128   
192    80     
144    -48    
32     48     
-432   -16    
32     0      
-160   80     
192    -192   
-576   208    
336    -32    
-80    -80    
-272   384    
-400   3472   
480    560    
-1536  -352   
-688   -576   
2320   432    
-1664  -1104  
-672   256    
704    -16    
-320   96     
-16    -64    
-112   160    
160    -176   
-816   336    
480    -96    
64     320    
-160   -160   
-528   64     
336    96     
-80    560    
-224   -144   
-160   -752   
-128   -416   
-224   144    
832    112    
-672   192    
-32    -112   
64     -304   
-1200  -752   
64     -672   
-288   592    
192    752    
-144   48     
-96    -352   
96     -208   
-16    144    
80     160    
-304   -80    
192    144    
160    64     
-304   -16    
160    -336   
-144   -432   
-352   -384   
-480   -1088  
-512   -704   
16     -560   
-224   -800   
640    -192   
-320   768    
-32    288    
-32    -208   
-288   -160   
1136   -320   
-816   -848   
-96    -368   
400    -496   
-64    160    
288    1728   
-384   240    
288    -880   
-128   560    
-112   -272   
192    176    
-192   0      
-208   -32    
208    48     
-112   256    
-80    160    
208    320    
0      48     
-64    16     
80     -16    
32     64     
96     0      
-144   16     
96     80     
-352   352    
160    -16    
288    -240   
-208   48     
-160   80     
-176   -480   
464    -160   
-304   288    
-592   112    
192    128    
80     -64    
-224   -336   
-80    -144   
-400   208    
-32    208    
384    -160   
-96    -96    
-272   -144   
128    0      
144    224    
272    192    
-224   64     
-288   256    
32     144    
-224   -448   
800    -480   
32     576    
-416   48     
-32    64     
-240   144    
400    384    
-176   1344   
192    160    
112    64     
-224   0      
-80    -272   
480    -288   
0      224    
-160   368    
48     48     
-112   80     
64     -336   
96     288    
-208   80     
-32    16     
-160   96     
240    32     
160    -224   
-288   -240   
160    -192   
384    -64    
64     128    
-80    -128   
-272   176    
528    1472   
112    208    
-1952  -560   
1824   48     
-528   -1120  
-432   -1824  
640    -576   
192    1360   
-16    -208   
368    -992   
-400   -352   
0      288    
288    80     
-64    352    
-112   528    
112    192    
48     0      
-112   528    
-112   -416   
48     -784   
-192   -368   
-32    624    
2528   16     
-1872  992    
640    -1424  
80     -240   
-320   672    
-32    1248   
880    400    
-304   -608   
16     -320   
-96    0      
288    592    
-128   80     
-304   -80    
800    48     
-608   0      
384    32     
-496   384    
-304   48     
288    16     
176    -96    
464    32     
-128   896    
-64    -368   
-1056  -128   
528    320    
544    112    
-1312  672    
480    -384   
32     80     
80     32     
0      112    
-128   128    
208    -432   
896    -96    
-464   112    
352    528    
320    -144   
-16    336    
-896   400    
240    112    
176    16     
-32    -96    
-400   64     
0      416    
928    -32    
-160   144    
-416   96     
256    1376   
2176   3968   
-2128  1696   
416    240    
1872   -288   
-960   -16    
-624   -240   
864    -560   
336    -528   
384    -128   
-672   -128   
320    -1680  
16     -16    
288    208    
32     -48    
-128   272    
-320   -32    
320    160    
-96    0      
224    640    
-208   16     
-224   368    
592    -80    
-560   -240   
144    224    
208    144    
-176   -1024  
112    48     
16     48     
-192   -48    
240    240    
288    32     
-144   112    
208    32     
-16    -128   
-144   -64    
-192   -112   
384    256    
-112   560    
48     240    
-32    256    
96     -240   
-432   48     
416    272    
96     224    
0      96     
-144   160    
-112   192    
528    336    
-352   64     
144    64     
64     0      
352    1280   
-912   144    
32     -432   
368    0      
-128   -224   
-240   -32    
192    -576   
80     -80    
176    -144   
-240   96     
160    0      
48     144    
-80    -80    
176    64     
-48    32     
80     416    
128    272    
160    -16    
-608   272    
416    -336   
-16    0      
112    -176   
-64    160    
0      368    
80     -224   
-112   464    
240    32     
-64    -160   
64     256    
-336   -208   
1392   2256   
1440   32     
-1408  576    
-192   464    
272    -304   
192    160    
0      -560   
192    1136   
96     -80    
-256   -32    
400    176    
112    -64    
-192   48     
224    240    
80     256    
80     -224   
96     688    
-64    -96    
-112   -48    
240    -240   
160    1488   
432    -736   
-544   112    
288    -896   
48     192    
272    848    
336    -48    
-560   -304   
128    32     
48     96     
352    48     
-144   368    
-32    -288   
-16    192    
-32    -112   
-80    96     
368    -368   
-16    -64    
-416   -96    
416    224    
272    64     
0      -32    
-352   48     
64     0      
432    288    
-192   -320   
192    160    
-352   0      
192    384    
720    192    
-1776  -208   
944    208    
-432   -48    
-720   -496   
896    224    
272    240    
-304   544    
-672   320    
384    -336   
304    -1952  
-144   -176   
-144   112    
-96    -288   
512    -48    
-144   -400   
64     192    
-160   112    
336    640    
-96    496    
-64    -960   
400    96     
-1632  64     
1168   368    
128    224    
256    -352   
208    320    
-480   256    
-128   -320   
240    -960   
112    -208   
-32    96     
-96    0      
32     32     
448    112    
-592   -480   
64     -16    
176    -160   
16     448    
-96    16     
-224   -272   
-208   0      
-240   -480   
-16    -288   
208    -320   
496    -256   
-336   -400   
208    0      
-144   -240   
-176   112    
-80    -64    
144    -576   
768    -528   
-848   320    
288    80     
432    -560   
-1808  304    
176    -352   
48     16     
96     -256   
-96    96     
-32    32     
128    -64    
192    -1040  
-160   240    
448    272    
-912   432    
32     -64    
352    32     
-576   -1264  
-480   -1968  
1488   -2416  
560    352    
-928   -64    
-656   544    
352    -752   
-208   -1696  
352    -112   
16     -752   
-416   368    
272    -304   
352    64     
-160   -96    
-128   608    
-320   -32    
320    -16    
80     320    
128    -144   
-608   0      
176    496    
96     528    
224    64     
-32    -112   
-304   -912   
224    -480   
-144   -288   
176    -32    
-256   704    
-96    1296   
192    656    
-112   -464   
-16    -64    
16     -144   
-208   -144   
160    -976   
-448   -400   
96     -624   
-80    -672   
64     -560   
160    560    
-160   -2912  
352    0      
-128   224    
-16    128    
-192   128    
304    -944   
-400   -176   
368    992    
272    592    
-112   144    
-368   -176   
-208   -512   
448    -496   
-720   -1088  
272    -896   
256    -1456  
-304   -448   
-224   -464   
528    400    
272    1136   
-176   -208   
-320   -128   
64     160    
96     256    
-144   -16    
16     -144   
32     -512   
-80    80     
-16    320    
256    16     
-320   -464   
320    -128   
-368   80     
112    -96    
-80    -112   
224    -64    
-528   -144   
0      400    
256    304    
-192   64     
-272   0      
-336   -416   
688    -304   
-16    288    
336    -240   
-352   -48    
-320   112    
-224   -64    
528    -208   
96     128    
-320   480    
160    -80    
-48    -112   
-64    96     
256    -64    
-160   192    
-320   -80    
48     176    
-16    160    
128    32     
0      -32    
544    272    
-1168  736    
432    -240   
336    -80    
-144   -160   
-144   208    
-48    -240   
400    544    
-64    272    
64     -256   
32     -144   
-48    160    
-144   -240   
-208   -416   
48     -64    
240    16     
-464   -448   
-256   -704   
368    464    
240    576    
-288   64     
-368   -192   
144    32     
144    -128   
240    80     
-544   -400   
-160   208    
272    -192   
0      -256   
-144   0      
-1696  592    
1552   704    
-16    464    
-384   32     
-496   368    
1056   -384   
-1584  -464   
176    -384   
272    -144   
-368   64     
-64    48     
32     96     
0      -80    
176    48     
-32    -80    
-80    32     
-272   -224   
80     -48    
16     -128   
-192   96     
-192   -688   
688    64     
-1008  176    
-16    -288   
576    784    
128    304    
-112   -48    
80     64     
96     16     
-128   -576   
-640   96     
480    128    
-32    64     
-192   240    
-320   -272   
112    0      
-64    64     
-256   -32    
272    -128   
176    96     
-224   48     
0      96     
-96    272    
976    -240   
-720   192    
-112   -976   
112    -736   
-288   -1104  
-32    -720   
544    80     
-48    240    
64     416    
-144   288    
-80    -80    
352    -32    
-512   -240   
-256   -464   
-128   464    
240    -16    
64     160    
48     80     
-208   80     
0      176    
192    80     
-160   -32    
336    64     
0      0      
80     16     
-176   -80    
-368   -1632  
-1632  -1712  
832    256    
-80    560    
-912   -272   
576    48     
848    -240   
-960   288    
-240   0      
-128   -240   
416    -112   
-336   192    
-640   -128   
-32    80     
-368   -208   
96     0      
-288   176    
32     128    
-16    32     
112    -304   
-656   -80    
480    -64    
-608   96     
736    224    
688    96     
-864   -48    
-192   160    
512    64     
256    32     
-512   0      
208    192    
112    -32    
144    112    
-176   112    
-240   96     
192    272    
400    272    
-160   192    
-192   272    
96     0      
-208   128    
288    16     
-608   -48    
176    128    
160    96     
-160   144    
-336   -48    
112    48     
272    80     
16     16     
-32    64     
-128   48     
144    608    
-688   -64    
-96    -304   
-560   -64    
560    16     
-512   128    
-320   80     
400    352    
336    96     
-304   160    
32     128    
64     112    
80     160    
-48    64     
-48    -48    
80     688    
-112   272    
-144   -128   
240    48     
80     128    
-144   112    
208    128    
128    240    
-48    480    
-432   -400   
448    -880   
32     400    
-128   0      
32     -464   
-192   -720   
640    -1872  
-1264  672    
1248   16     
-608   -224   
-432   448    
384    -176   
96     -560   
48     -384   
-288   128    
368    320    
-112   160    
288    -240   
-288   144    
64     -240   
128    304    
32     192    
80     128    
-224   496    
-32    80     
192    64     
-496   144    
1056   -2160  
-800   208    
368    48     
256    320    
-112   -80    
32     96     
208    640    
48     272    
0      -48    
240    16     
-272   -64    
80     128    
112    16     
192    -288   
80     144    
-64    -576   
0      144    
-48    112    
16     64     
240    80     
-144   240    
384    96     
-320   -80    
-64    0      
448    48     
-384   160    
224    128    
96     32     
816    -512   
-1952  1504   
416    -352   
432    -288   
-608   -384   
880    -64    
-448   -16    
96     -352   
144    -32    
-80    32     
-224   32     
80     128    
208    80     
-32    112    
-112   48     
224    -176   
64     160    
144    256    
160    224    
-144   -576   
112    0      
624    336    
-2064  896    
624    -176   
352    352    
32     672    
-336   128    
160    -80    
-128   -112   
80     -16    
160    -80    
16     192    
96     32     
-96    112    
-48    -96    
48     128    
-48    320    
32     160    
112    400    
-48    -16    
-192   32     
128    128    
-48    48     
208    256    
400    112    
-112   -416   
80     -352   
528    16     
-256   80     
-272   -176   
768    544    
32     -1040  
0      192    
144    112    
736    80     
-480   -176   
480    -176   
-608   208    
-144   192    
512    192    
48     -144   
-288   80     
-96    -128   
128    128    
208    -112   
656    1072   
-960   832    
96     128    
16     -240   
144    -192   
-512   -176   
176    560    
976    -256   
-672   -928   
48     592    
896    -224   
336    -544   
-464   -448   
-208   1264   
-176   304    
256    256    
96     -656   
-64    -336   
32     592    
304    -384   
368    656    
-272   1024   
-144   -560   
208    160    
304    240    
-128   0      
-96    -16    
176    -112   
-176   -80    
16     128    
64     720    
-32    -160   
128    240    
192    208    
-16    -704   
144    608    
16     -1392  
-208   -32    
224    32     
112    -272   
-208   144    
160    -80    
144    1072   
480    0      
-480   -1248  
-192   -608   
400    112    
208    -496   
48     48     
-160   -368   
-128   -128   
-288   -112   
112    -272   
128    -48    
144    -128   
0      -240   
-64    -112   
368    -864   
-928   -656   
-16    -1280  
272    288    
208    1472   
112    928    
288    1856   
96     320    
96     -592   
-160   352    
-48    -32    
-672   -256   
544    64     
-32    -176   
-160   -912   
-80    -288   
32     -528   
288    64     
-256   -480   
-240   0      
0      112    
32     256    
16     -48    
-240   -112   
336    -464   
448    -448   
-1072  -448   
-416   -384   
240    -16    
704    1072   
-848   256    
240    -80    
96     1056   
-144   -128   
368    176    
64     352    
-160   592    
-112   256    
464    -272   
96     -32    
-224   -128   
-288   64     
128    -112   
-496   176    
144    -304   
-208   -192   
-80    48     
208    80     
112    -560   
64     -848   
-224   -880   
0      704    
176    -96    
80     -80    
-16    -736   
-336   -752   
64     1088   
224    -16    
-928   -256   
-32    -32    
-288   320    
0      400    
0      -528   
176    -336   
-112   592    
-64    -144   
96     320    
-192   -224   
-80    -16    
-176   128    
224    112    
-176   16     
144    -160   
-528   192    
432    32     
-128   -48    
-144   -192   
-176   -32    
-320   -1248  
1408   -1552  
-368   -1136  
-16    304    
560    288    
-1488  -128   
992    -208   
272    32     
-912   112    
-16    32     
96     16     
208    80     
-176   0      
0      -224   
416    0      
-112   -512   
80     144    
-32    -304   
192    -112   
160    -64    
48     -16    
-800   -672   
1120   272    
-1264  -160   
688    -240   
208    304    
-896   -160   
-224   -32    
464    32     
352    -240   
-272   -128   
-144   240    
-176   -16    
272    32     
-32    64     
64     -144   
-576   48     
400    224    
-32    -208   
448    -224   
-224   -32    
-208   96     
-256   -288   
1008   -48    
112    368    
-64    -240   
128    -560   
-224   -160   
-48    384    
-288   304    
400    -144   
-320   -16    
-160   224    
128    224    
64     -112   
144    -96    
-400   -192   
-240   96     
192    -240   
544    -224   
-48    -48    
-464   96     
144    16     
-48    -64    
128    -160   
-592   48     
288    -384   
-576   480    
528    -48    
-160   32     
-1664  -1248  
2432   -1200  
-432   128    
-448   -576   
832    736    
-784   -96    
-480   160    
688    272    
288    240    
-496   -176   
320    80     
160    96     
-176   -48    
160    80     
-144   112    
256    32     
-272   32     
560    160    
-112   -96    
-128   -288   
-1056  -528   
816    -320   
-288   192    
560    -112   
32     -224   
-1184  -64    
880    64     
-224   32     
144    224    
-336   96     
48     240    
-256   -144   
112    288    
-160   -160   
176    336    
240    32     
-496   288    
16     -208   
-112   144    
144    112    
-320   0      
224    0      
-192   0      
-400   -64    
-80    -160   
304    0      
-768   -448   
448    -144   
-352   -160   
416    192    
-48    64     
-416   96     
-128   -704   
-288   0      
480    64     
-496   -32    
208    96     
-48    32     
144    144    
112    -16    
-256   256    
-64    160    
96     32     
256    -128   
-128   80     
-96    -80    
-320   -32    
352    -112   
-288   112    
336    -96    
96     -16    
-224   80     
0      48     
-144   16     
-112   0      
128    288    
-128   160    
128    -144   
-48    128    
-16    896    
288    368    
528    -144   
-1504  1408   
1488   -96    
-192   432    
128    -208   
-336   -32    
-176   224    
320    32     
-256   416    
224    -16    
-624   -192   
128    176    
64     112    
144    48     
-448   128    
240    32     
-144   432    
144    272    
80     -32    
-128   64     
-304   -64    
800    288    
-464   -16    
-400   -1088  
464    96     
-320   128    
-48    128    
288    608    
304    224    
-448   368    
-304   128    
320    -32    
128    80     
128    64     
176    96     
-160   208    
-240   -240   
160    176    
80     80     
-128   -16    
32     -48    
-32    -304   
-64    -128   
208    -112   
-160   384    
160    -16    
-96    32     
-64    -144   
0      176    
384    656    
-32    -1072  
-2592  224    
1344   672    
-336   -48    
-304   208    
816    32     
-1040  -368   
128    320    
-176   -192   
32     144    
384    80     
-160   112    
-32    64     
192    80     
-512   -80    
208    112    
-96    160    
-176   416    
208    400    
-16    192    
-16    272    
112    896    
2048   -144   
-1568  -784   
624    -272   
304    112    
-544   768    
992    -96    
-288   -80    
-240   -96    
-96    128    
192    96     
272    144    
-192   -144   
-128   368    
-64    368    
64     -16    
64     176    
160    0      
-32    192    
64     16     
160    64     
-96    -48    
-416   576    
784    432    
48     560    
-704   -64    
768    224    
-672   16     
-64    -320   
224    -96    
352    496    
-48    464    
-144   320    
112    -624   
-560   560    
-416   448    
-368   -752   
64     -368   
96     -272   
-48    -48    
112    -224   
112    448    
-112   336    
-96    -400   
256    -128   
-768   192    
-96    336    
640    -128   
-272   -32    
-272   -928   
1392   -1648  
464    528    
656    -192   
-1328  -96    
144    -544   
208    -720   
496    816    
-48    192    
-432   -672   
208    272    
16     304    
528    0      
80     -432   
-368   -80    
-304   -240   
496    -224   
288    160    
-96    -272   
-480   -560   
272    848    
352    496    
96     -496   
-368   -16    
496    -608   
-384   240    
512    288    
-224   1088   
-16    1504   
-32    -176   
112    -272   
368    240    
-336   -112   
0      352    
320    -416   
-16    -192   
160    832    
208    -144   
-352   -496   
-96    -416   
384    -448   
-320   112    
208    592    
-272   -272   
64     -352   
112    -176   
32     576    
112    -288   
-128   -640   
688    16     
-464   160    
-64    -688   
-560   -32    
832    736    
0      96     
-48    464    
16     0      
-176   -1616  
0      -2512  
352    960    
32     768    
-48    80     
192    64     
-256   -48    
-16    128    
256    720    
336    336    
-16    272    
-304   -464   
224    160    
160    752    
-80    -512   
160    -368   
-160   -128   
192    288    
32     -624   
208    -448   
-32    -1232  
-352   -272   
192    272    
64     144    
592    2032   
880    400    
-448   -304   
-400   -1520  
368    528    
-288   -64    
-32    288    
624    256    
-112   304    
0      160    
-48    176    
-32    -112   
288    -64    
80     -112   
96     -48    
-352   0      
288    -1056  
272    208    
-16    -304   
-64    -80    
128    1696   
144    864    
32     416    
320    240    
-176   -176   
336    336    
-192   608    
192    320    
-96    32     
16     -96    
192    128    
-16    -368   
-144   -32    
352    48     
-80    352    
-304   496    
496    240    
224    -432   
-224   48     
224    80     
80     -112   
-32    48     
-64    -1920  
16     -1488  
336    -144   
-128   -2128  
32     80     
-48    -928   
144    -112   
1136   1296   
-528   1104   
-912   544    
1296   336    
64     240    
-1008  -192   
-32    -640   
736    -336   
-752   -720   
224    16     
256    -256   
-304   128    
320    -144   
-144   -528   
336    -304   
-288   -704   
176    0      
-480   -448   
288    304    
16     -144   
-352   32     
32     -672   
1152   224    
-784   -32    
592    -240   
-928   -80    
160    144    
64     -192   
96     336    
432    -144   
-208   -224   
80     0      
-16    -112   
-64    64     
288    -256   
304    16     
-368   -160   
160    32     
-416   224    
464    -192   
-672   -288   
96     -112   
-64    -544   
-1136  112    
1232   112    
1056   -592   
-448   -576   
-112   -528   
-80    304    
16     112    
496    112    
416    128    
-336   16     
-192   96     
352    -368   
-880   -384   
128    64     
-336   240    
192    176    
576    -96    
288    -544   
-848   176    
-592   -784   
896    -64    
48     -32    
176    832    
-720   -64    
352    304    
-272   -64    
-368   64     
-640   1824   
2656   -1504  
-1552  1104   
960    -688   
32     -288   
112    64     
-656   32     
576    272    
512    256    
-144   16     
-560   16     
320    144    
-80    -208   
240    32     
-240   -80    
0      64     
-528   -128   
384    160    
-192   -288   
-1168  -176   
768    -16    
-384   128    
192    96     
16     -80    
-448   -2368  
880    -208   
-720   80     
48     -32    
304    64     
384    0      
-528   224    
352    32     
-784   -96    
384    -320   
16     -16    
-208   -96    
-32    240    
512    -288   
-464   80     
160    -1664  
-16    -48    
-96    -48    
224    32     
-352   64     
304    16     
-128   16     
16     0      
-16    32     
320    608    
-416   560    
304    64     
192    64     
-16    64     
368    128    
-448   48     
608    0      
-368   -16    
64     128    
288    128    
-112   -496   
-320   -352   
-32    -64    
128    192    
64     176    
-192   272    
-96    -160   
144    64     
-160   -368   
-16    -336   
64     -304   
-688   -144   
64     -112   
-1232  -32    
-368   -16    
32     128    
176    432    
320    48     
-480   -224   
-624   -800   
128    -208   
96     -384   
992    1360   
-2224  1152   
1248   -384   
-48    -528   
-400   -432   
-272   -288   
-560   -528   
112    -48    
-192   16     
-32    80     
-240   -16    
-208   -48    
48     336    
384    112    
-496   16     
-208   -336   
224    -704   
-48    -320   
160    -320   
-160   48     
-272   -448   
640    -704   
-304   592    
16     -752   
-400   432    
192    -80    
-48    496    
224    -448   
-96    272    
-144   -192   
160    96     
-112   -48    
176    32     
-160   -96    
80     80     
-208   80     
112    208    
-192   -48    
-160   -32    
-128   -16    
-560   -32    
32     -48    
240    -368   
192    480    
-288   -32    
-224   -160   
64     64     
160    448    
0      176    
-304   -32    
1088   16     
-3216  -160   
464    240    
880    -704   
-720   160    
-192   -160   
688    624    
-1072  -976   
80     -608   
224    640    
0      448    
-368   -240   
16     272    
192    -16    
-176   160    
-32    -144   
-112   -112   
144    32     
128    160    
-112   16     
-560   -768   
1312   1040   
48     -288   
-1616  1088   
1440   880    
-352   -448   
-736   -768   
624    112    
144    400    
-432   144    
48     192    
208    80     
176    320    
-528   -224   
-96    -256   
-176   -160   
0      240    
528    -128   
-480   -1008  
-496   -976   
432    -208   
48     -160   
-80    -528   
480    224    
-224   672    
32     1136   
800    864    
-560   48     
-352   416    
448    -352   
-400   -112   
48     -320   
-352   320    
496    48     
-208   -112   
576    112    
32     -384   
-1120  -768   
640    -1040  
-320   32     
416    240    
-144   -64    
-352   48     
224    -336   
64     112    
64     304    
-352   -112   
-64    592    
192    336    
-96    48     
368    800    
0      -272   
176    -368   
768    368    
-48    848    
-496   448    
368    176    
576    -544   
80     -224   
-368   -624   
-96    624    
384    -400   
208    272    
-256   464    
48     320    
-208   192    
160    -48    
16     160    
-176   448    
64     848    
160    384    
32     16     
-400   -368   
432    720    
272    -224   
-864   272    
816    64     
-480   1600   
672    1664   
-128   848    
-256   -880   
272    -112   
112    -160   
96     336    
64     192    
48     48     
-32    -464   
544    -688   
-128   -96    
-112   -64    
64     560    
16     624    
384    416    
-512   -192   
128    -16    
0      480    
48     -208   
576    -240   
-384   640    
-16    -64    
-112   -288   
-112   -1424  
-64    -176   
-64    720    
-160   -752   
-2384  368    
1520   -272   
-112   -192   
-624   112    
96     -528   
480    0      
-32    -256   
-224   -352   
16     -32    
0      448    
80     560    
-80    256    
-64    32     
-32    448    
640    1392   
-592   864    
-32    528    
320    80     
-32    336    
-16    64     
-160   -64    
272    -656   
-336   80     
176    464    
64     240    
32     208    
-48    1616   
1600   -288   
-1200  -144   
288    160    
48     -480   
192    -3456  
-240   -640   
32     -848   
-112   352    
320    416    
-256   256    
160    320    
-32    -416   
48     -320   
304    272    
-304   256    
16     -224   
240    -64    
-80    64     
48     112    
-176   80     
816    -336   
-688   32     
208    160    
560    128    
-400   304    
320    16     
-96    -48    
80     -176   
-304   128    
656    176    
-176   48     
-128   -48    
-176   -48    
352    272    
272    -256   
-240   112    
-240   -576   
176    96     
288    16     
32     128    
32     112    
-192   -16    
352    -144   
-208   64     
224    48     
32     144    
48     192    
-240   -208   
1744   1696   
-848   -240   
-2304  848    
2240   -416   
-16    192    
-320   -80    
-224   -112   
304    0      
208    160    
-144   -16    
224    0      
-176   128    
256    176    
80     224    
-160   -352   
-144   240    
304    -208   
-128   96     
96     -544   
-32    176    
80     -16    
336    704    
352    -560   
-1520  0      
848    -704   
640    16     
-656   432    
160    144    
208    96     
-48    -128   
176    -16    
-352   -112   
16     176    
48     224    
224    64     
320    -176   
-432   144    
-32    -208   
-128   288    
496    80     
-80    32     
-368   80     
80     160    
768    -96    
-352   -112   
192    416    
224    256    
-752   -32    
-752   -256   
-256   -352   
608    -160   
416    0      
-736   432    
-176   -80    
-16    48     
544    96     
288    640    
-432   -48    
-336   -96    
96     80     
-336   144    
128    -320   
-128   144    
64     -96    
112    48     
48     -64    
-128   144    
0      16     
64     32     
112    0      
1856   5312   
-960   2336   
-768   -992   
2160   -1248  
-112   -176   
-704   176    
288    80     
224    -256   
-336   0      
-144   48     
368    48     
96     -960   
-272   16     
448    -320   
-272   -64    
-336   64     
208    -528   
80     -112   
-144   -912   
576    192    
-96    -1424  
-160   -112   
128    272    
-448   -288   
-176   -16    
640    80     
0      -48    
-272   112    
176    -16    
384    16     
-416   -240   
-176   -176   
16     80     
400    512    
-288   208    
-176   112    
384    -16    
192    -1264  
-256   64     
64     256    
240    176    
128    -64    
16     32     
0      -480   
-480   -416   
-160   -32    
128    -320   
-800   -256   
0      -400   
-32    -544   
-80    -736   
128    288    
-304   -512   
144    288    
-208   352    
224    -608   
320    -736   
-624   -496   
240    -64    
128    -208   
-224   -128   
80     -352   
-496   -736   
-368   -416   
256    -496   
128    -192   
-304   -432   
80     -352   
112    -848   
-192   -560   
16     32     
0      192    
208    48     
-112   -32    
-160   32     
-16    32     
288    272    
-64    704    
16     -192   
-688   48     
0      -16    
-192   -1472  
-176   -128   
-288   0      
-128   -1808  
432    640    
-304   -368   
-32    176    
208    64     
48     -16    
-96    192    
32     -48    
-224   -128   
-48    80     
-176   320    
-64    64     
-16    128    
-144   -464   
96     336    
16     -496   
-48    272    
704    -96    
-1264  576    
880    -128   
-32    368    
-176   224    
-96    -48    
-384   -400   
48     -80    
-224   400    
80     -176   
-448   -272   
-144   -384   
48     -16    
16     -240   
208    224    
128    -2608  
-128   -16    
-272   128    
368    80     
-96    240    
-112   0      
-336   32     
128    96     
144    -80    
32     -448   
-448   256    
64     176    
144    128    
128    -272   
16     64     
-1968  -768   
1120   528    
32     -784   
-1392  32     
944    864    
144    -160   
-704   -144   
864    160    
80     1072   
-208   -720   
48     -16    
-48    256    
-240   -160   
416    -384   
112    160    
-48    -160   
-96    64     
256    -176   
96     416    
-336   -112   
560    1616   
-1024  -832   
-416   608    
624    -288   
-384   -1056  
272    -832   
-288   -816   
240    -1296  
-752   -1632  
-64    -368   
-112   -64    
-32    576    
288    800    
-528   816    
0      592    
768    48     
-576   544    
224    1232   
16     912    
-48    336    
32     112    
-16    128    
-64    208    
-80    -1168  
-736   -288   
272    304    
80     800    
-592   288    
288    528    
16     -16    
-1104  96     
112    -160   
400    64     
16     448    
-576   -320   
-256   -944   
320    -96    
272    1056   
-704   640    
-368   144    
368    -160   
-272   64     
256    464    
-912   592    
0      -224   
368    -144   
-64    -16    
-240   64     
-528   304    
-240   -16    
-592   944    
-80    448    
-704   -224   
-784   -48    
608    -1264  
64     -896   
-496   -224   
-144   -640   
176    352    
80     976    
-16    256    
-432   16     
-272   -112   
400    192    
208    96     
-352   -16    
96     -16    
240    224    
-144   368    
-256   144    
96     304    
-16    -64    
432    48     
192    128    
-1488  64     
736    -288   
-16    80     
112    -416   
-672   -48    
304    -432   
144    -64    
-112   -32    
32     -80    
96     -16    
272    32     
-80    -80    
-464   -256   
-32    0      
-16    64     
16     -416   
-560   -256   
128    -144   
-128   128    
48     192    
224    -176   
-80    80     
-112   -592   
-464   -208   
368    32     
80     352    
-64    224    
-80    112    
208    -224   
-304   -64    
48     144    
496    496    
-848   304    
80     -832   
-112   -496   
304    0      
-176   224    
-96    -80    
112    -32    
-48    32     
-16    192    
-16    160    
-304   -208   
208    48     
-64    320    
160    192    
-368   -224   
16     304    
-16    256    
32     160    
16     -64    
-448   -16    
-80    0      
288    160    
96     224    
-192   -16    
-544   -784   
864    -2128  
-1264  672    
1056   -288   
-896   64     
-64    400    
208    304    
176    -112   
272    768    
-496   -320   
-160   176    
320    80     
96     -64    
0      -128   
-224   112    
-48    128    
416    -112   
-16    304    
-48    -160   
-112   160    
-48    224    
288    1520   
864    -400   
-976   -144   
352    64     
288    32     
-144   720    
432    -192   
-176   32     
-64    -288   
-240   160    
432    160    
272    112    
-464   96     
160    176    
-32    -160   
128    192    
-48    96     
592    144    
-640   112    
240    80     
96     144    
32     96     
0      16     
-288   -288   
80     64     
112    -80    
-240   256    
288    80     
-144   240    
-368   496    
32     400    
-1008  48     
288    -48    
656    240    
-448   112    
-96    96     
112    -96    
-192   128    
-80    -112   
160    112    
352    48     
-224   96     
128    16     
-528   32     
336    176    
-32    80     
16     -16    
-176   64     
176    32     
-112   48     
-16    -608   
-704   816    
784    80     
-1280  -224   
1296   192    
-160   16     
-848   224    
336    -16    
512    16     
-352   32     
-32    80     
144    96     
80     80     
64     80     
-320   48     
80     64     
160    256    
-80    -32    
80     128    
48     32     
-112   128    
-208   208    
912    -304   
-784   48     
80     -32    
304    176    
64     -208   
304    -2080  
-48    272    
288    -320   
32     320    
-368   192    
288    0      
304    176    
-352   304    
-304   -112   
-16    16     
304    400    
656    -48    
-640   -48    
-48    32     
240    80     
144    -256   
64     96     
0      -32    
-304   320    
336    64     
48     0      
-128   -256   
1568   -1760  
-3136  -720   
2112   384    
976    112    
-896   256    
-624   128    
112    -304   
1264   320    
-256   -528   
-352   224    
544    352    
-224   240    
272    -160   
64     272    
-272   -208   
288    272    
208    -48    
48     128    
-320   -288   
608    160    
-64    -944   
16     -832   
96     64     
-592   -208   
-352   -176   
1088   -1376  
-32    160    
-32    480    
-240   432    
160    -112   
128    -48    
-112   224    
432    240    
-240   -48    
0      80     
-112   -112   
16     -272   
-32    80     
208    -144   
32     224    
-112   -176   
192    112    
112    -1120  
144    448    
-192   400    
32     480    
464    352    
48     528    
-240   288    
256    704    
272    880    
704    1264   
-1136  208    
-176   -944   
144    -128   
224    -1136  
-368   -160   
-48    -1104  
-224   -432   
304    208    
128    576    
-80    -736   
-144   -352   
-144   -256   
-176   -576   
208    336    
64     -208   
-240   -304   
-112   -16    
64     -32    
80     -128   
48     96     
-96    -64    
-16    112    
112    560    
288    128    
-128   -144   
48     768    
400    -240   
-336   -32    
-128   352    
720    784    
-928   800    
400    -608   
640    144    
0      -144   
0      64     
32     -432   
-96    48     
-16    -144   
192    320    
-64    208    
-96    224    
96     -448   
304    -192   
-176   -544   
-256   -192   
224    -48    
-64    16     
192    112    
48     -16    
208    -384   
-1072  -384   
560    -1008  
320    432    
-32    112    
-144   -256   
-480   160    
-288   624    
128    -176   
560    -480   
-144   -272   
-608   96     
448    -64    
240    -160   
-144   -16    
16     -368   
144    112    
-64    -752   
32     128    
240    -32    
-288   320    
-448   -80    
160    -256   
-96    -160   
288    -896   
272    -64    
96     -288   
48     128    
-496   96     
432    -208   
-1568  960    
3024   -112   
-144   -272   
-1248  640    
928    816    
464    512    
-208   1120   
-80    1840   
-688   -608   
112    -848   
144    -256   
-96    -240   
-160   -720   
-48    -1216  
272    -288   
240    64     
-112   160    
-304   -816   
240    96     
-80    80     
336    -64    
-2144  96     
720    240    
176    -640   
-1056  -2080  
224    -1136  
576    -320   
-480   -1088  
-464   -976   
528    -560   
-480   -720   
-80    32     
416    176    
-320   256    
-128   208    
448    -96    
-272   -240   
432    -656   
-384   -304   
64     -160   
272    64     
-240   16     
-400   -160   
-80    -1056  
1344   -944   
-368   -272   
208    1472   
-416   480    
-96    -80    
176    672    
592    64     
-432   -256   
16     -352   
-352   -208   
640    32     
-416   224    
-1104  560    
304    -64    
-432   -320   
432    -208   
-352   -560   
-304   -16    
256    384    
544    -112   
-112   -48    
-432   -48    
-256   80     
224    64     
-432   -784   
-288   -1872  
704    -1120  
960    -160   
-1504  48     
-496   32     
160    -560   
208    -384   
192    32     
-592   -1616  
-96    -336   
96     -576   
-48    80     
-80    112    
-304   304    
-320   -144   
848    240    
-256   -160   
-304   32     
-128   -576   
320    -1104  
80     -1616  
-176   -608   
-160   176    
-464   -144   
192    -192   
240    112    
-160   432    
544    192    
-464   -144   
160    128    
-80    -272   
-320   -32    
336    -400   
-592   -32    
32     -208   
80     192    
-1360  -384   
-304   64     
-256   -160   
-336   -16    
256    -16    
64     80     
-320   -16    
64     288    
-288   128    
-32    48     
-48    48     
-672   -112   
112    16     
48     16     
-480   96     
-192   80     
48     576    
-864   384    
32     -272   
272    -160   
-608   128    
64     32     
224    -160   
256    80     
96     272    
-128   -80    
-272   -176   
112    48     
112    -48    
144    80     
-144   400    
-272   80     
64     -112   
224    160    
-208   0      
-320   -176   
-16    -16    
112    48     
16     208    
-160   -176   
16     -128   
-256   -240   
176    176    
80     -16    
-80    48     
624    -1136  
-2544  1328   
1456   32     
192    -528   
-736   368    
560    -80    
-400   192    
-96    -256   
192    208    
-624   32     
-240   -128   
-192   240    
320    112    
176    -160   
-544   464    
272    96     
-64    -144   
0      -64    
16     96     
-48    16     
-16    704    
-192   -720   
-880   208    
1376   352    
-624   0      
-656   96     
400    144    
192    192    
-32    -224   
-224   48     
192    64     
-336   64     
176    48     
64     -64    
-400   160    
480    32     
-176   176    
-368   224    
128    -16    
-144   32     
64     32     
-96    -80    
80     96     
-240   -16    
640    0      
-432   96     
64     272    
32     -16    
-160   32     
-320   -576   
1280   -160   
144    272    
352    288    
-448   -240   
-384   0      
400    128    
-64    -112   
192    -16    
-384   96     
-144   -16    
192    112    
128    -48    
-64    96     
-64    176    
256    32     
-48    160    
32     -80    
-144   192    
208    240    
80     112    
-128   304    
-224   320    
1504   -208   
-816   336    
400    -32    
-352   80     
-192   144    
768    464    
-1152  400    
96     -176   
192    96     
32     -48    
-112   -64    
-128   192    
-144   -112   
288    208    
-32    -160   
-16    -320   
304    320    
-96    384    
-48    48     
112    -64    
-528   64     
640    304    
32     -48    
-320   48     
-176   -368   
320    -48    
0      336    
-176   -48    
432    192    
96     112    
-496   80     
128    48     
128    -16    
208    160    
-272   160    
320    432    
0      96     
-336   80     
400    48     
-208   64     
-128   32     
128    -80    
0      -80    
112    160    
-144   32     
-32    -32    
288    544    
-272   -224   
-1344  -1648  
-656   -464   
688    256    
-784   192    
928    368    
304    -304   
-944   224    
0      -288   
304    -240   
208    -160   
-144   -64    
-400   32     
336    272    
96     -176   
-144   32     
-288   96     
16     -80    
352    112    
-304   -464   
-224   -384   
224    128    
-16    112    
0      320    
816    384    
-592   352    
16     96     
160    64     
16     -176   
-560   -560   
144    -320   
352    624    
-16    480    
-240   -320   
-32    48     
272    288    
-256   96     
736    640    
-592   -176   
-128   -608   
288    -304   
16     -176   
-144   -112   
-176   -144   
688    720    
-272   672    
-16    528    
400    -944   
-816   -1104  
496    880    
48     464    
208    -224   
-448   64     
800    -672   
-752   -816   
384    224    
464    656    
-304   384    
272    256    
-64    160    
32     112    
-32    -144   
-32    176    
80     32     
144    96     
208    688    
256    816    
-96    592    
112    -144   
288    -544   
-352   240    
208    -688   
-272   160    
320    -16    
224    176    
-288   16     
-192   192    
128    -64    
272    -80    
96     48     
0      112    
32     16     
-480   352    
912    -480   
-944   -96    
368    -240   
-64    160    
48     112    
16     -304   
256    -112   
-32    96     
128    320    
208    112    
-112   -64    
-80    -64    
-176   416    
432    -272   
-160   -368   
96     -144   
32     144    
64     -32    
-16    -832   
672    -112   
-112   496    
-224   16     
16     512    
128    128    
0      -320   
-176   160    
48     480    
-112   -256   
-144   -80    
512    560    
16     256    
-208   -256   
192    -224   
208    208    
-96    128    
-288   80     
0      496    
-128   -144   
160    224    
0      -160   
0      112    
32     -576   
192    -352   
144    208    
-128   -128   
-32    -64    
192    -16    
224    544    
1312   1568   
-1248  1264   
-1136  -1136  
1472   -944   
-96    -2800  
-752   656    
-96    -48    
160    2208   
960    80     
64     -688   
-592   -1328  
176    -736   
288    -352   
-64    -48    
240    80     
-400   -64    
176    16     
304    -480   
-48    -144   
-288   -944   
64     160    
-192   832    
2528   240    
-1440  720    
448    1120   
576    -384   
112    -1888  
-480   -1328  
432    0      
176    144    
-512   0      
384    -112   
160    -208   
112    16     
-384   -288   
576    144    
32     144    
-16    608    
-368   272    
96     48     
208    -48    
144    -272   
128    80     
736    -16    
224    912    
-688   32     
-112   -32    
240    224    
64     48     
304    704    
-1008  448    
0      -208   
800    -2784  
-304   -32    
-800   -16    
-208   -48    
1104   624    
-464   -992   
-352   -320   
96     224    
-112   -112   
128    96     
608    -32    
-608   -1632  
-32    192    
144    -992   
-112   -80    
128    -352   
-288   80     
-480   -528   
2176   -1232  
-2176  -640   
480    -288   
1056   -32    
160    -544   
-624   -48    
-144   -128   
672    64     
304    -384   
-288   96     
128    -400   
-112   352    
-48    -128   
576    -64    
-272   -176   
-240   -80    
-112   -96    
352    -64    
-192   -368   
704    -656   
-608   0      
528    -688   
-416   -480   
384    -48    
352    -176   
208    -128   
-96    -112   
-112   -144   
240    400    
-208   48     
512    176    
-464   -80    
64     64     
-32    128    
192    16     
256    16     
-176   -16    
-112   -656   
-96    16     
-208   -64    
224    -64    
400    80     
-624   16     
48     208    
-240   32     
80     0      
192    -80    
-160   112    
128    112    
-48    48     
368    -16    
-176   -576   
352    -544   
-256   -336   
528    800    
768    80     
-960   -64    
528    -80    
-16    -112   
240    -224   
-144   -32    
-896   -96    
288    -208   
-320   -96    
352    -416   
-208   -32    
208    -48    
-96    144    
96     -1056  
192    112    
32     -16    
-224   -16    
64     112    
64     -96    
128    192    
-96    -80    
-128   16     
0      -64    
-16    80     
256    -112   
-176   -32    
-64    1776   
2128   -848   
-1648  -48    
192    -192   
96     -144   
624    224    
-272   -240   
32     -288   
-80    304    
-224   -16    
160    -144   
-112   -16    
-224   -32    
128    -336   
240    32     
-112   -240   
-64    -64    
128    -160   
-48    -144   
-80    16     
480    -752   
-1152  720    
864    -160   
-464   -144   
176    64     
-48    32     
-336   -112   
96     192    
192    -80    
0      64     
112    -272   
-224   112    
-96    -32    
304    -80    
48     -224   
-336   -16    
224    176    
-144   -128   
-32    128    
256    -144   
-464   80     
160    -208   
-48    64     
-128   -192   
256    96     
-720   -96    
-16    176    
-256   -208   
-384   0      
-320   -1824  
1248   352    
1024   -288   
-2320  -608   
1184   -192   
352    -80    
-1024  192    
592    -64    
-16    32     
-288   32     
96     32     
-384   -176   
160    48     
-288   -208   
320    80     
-272   -96    
-48    240    
-112   -80    
-112   -192   
-112   -288   
-256   32     
-208   -320   
1136   672    
-592   144    
-256   -832   
352    16     
-496   48     
144    -160   
368    320    
128    32     
16     -144   
-368   240    
32     48     
32     32     
-80    192    
-432   -176   
272    112    
-16    496    
-160   -112   
-144   -128   
336    384    
-144   -48    
-512   -672   
32     640    
432    112    
-304   -576   
-176   240    
496    -32    
-272   112    
-304   80     
48     -16    
112    64     
-1360  -144   
-16    -16    
48     96     
128    560    
-688   -448   
-288   336    
752    -64    
-688   -80    
784    -208   
-96    240    
-16    -16    
-32    192    
-208   48     
-160   -176   
112    528    
-240   -160   
-144   128    
-384   464    
480    -32    
-976   0      
-592   240    
-80    240    
-992   -112   
880    192    
368    -112   
-432   1568   
544    -320   
-224   -512   
-112   -128   
80     112    
-16    -336   
-128   -336   
-80    -176   
-112   288    
224    -368   
224    576    
416    240    
-384   -112   
-176   384    
304    560    
112    400    
-32    -16    
496    560    
-144   -256   
64     -400   
-288   -688   
-240   -496   
-384   -224   
240    592    
-16    448    
0      -320   
-432   -320   
240    144    
112    -32    
0      -576   
-592   -832   
224    -720   
-64    144    
-96    272    
-32    64     
-560   -256   
-128   -448   
-336   -720   
128    608    
64     1104   
-464   144    
560    768    
-176   160    
288    592    
-272   240    
-96    720    
704    48     
-288   240    
384    912    
480    272    
96     480    
-144   1040   
16     -544   
96     -192   
-112   304    
-32    -32    
-80    112    
-32    64     
352    -32    
64     -224   
96     -32    
32     -192   
384    -176   
-48    80     
-80    64     
-128   -16    
96     48     
16     48     
32     64     
0      80     
-112   0      
144    -96    
464    64     
-336   112    
-32    16     
-592   944    
736    -352   
-416   16     
-144   144    
144    16     
-176   160    
368    224    
-144   176    
-128   80     
224    80     
144    0      
48     -64    
-80    -32    
176    -80    
-80    -48    
96     -432   
48     -416   
208    -672   
16     -512   
-224   -208   
544    -496   
-432   432    
544    -176   
-80    224    
-224   304    
16     176    
272    864    
352    -240   
-288   -16    
-176   -32    
368    -16    
-48    384    
32     -160   
192    16     
-272   592    
-240   16     
80     -816   
384    656    
32     64     
-304   848    
-400   -784   
688    368    
16     64     
-240   128    
-384   352    
528    176    
208    -272   
-64    64     
-96    144    
1056   -32    
-2832  208    
512    336    
672    624    
-336   -592   
80     832    
496    112    
-880   608    
208    816    
544    240    
-176   -64    
-32    -32    
-128   -48    
-16    112    
240    240    
-80    -32    
-16    80     
-64    144    
160    320    
-16    0      
-192   272    
160    1200   
2096   176    
-1632  32     
624    -80    
16     -192   
-528   240    
880    -400   
-224   304    
-64    -48    
144    -608   
96     16     
144    -2592  
-192   -144   
-112   64     
496    160    
-144   64     
-272   -64    
272    -80    
48     400    
-288   64     
336    448    
-16    -144   
-256   64     
16     400    
-16    384    
-240   16     
224    -112   
-336   -144   
-256   -80    
480    -16    
192    224    
-128   272    
432    288    
-112   208    
-176   -32    
-32    64     
-128   288    
144    -208   
-384   80     
368    128    
256    32     
48     -64    
-48    128    
-112   160    
-304   448    
1344   64     
-560   64     
-656   64     
-416   -1056  
-800   -2576  
-400   -96    
-272   544    
448    256    
496    224    
32     48     
-960   272    
432    -112   
208    192    
-96    -688   
-208   176    
-176   -48    
-144   304    
144    48     
-128   176    
-208   -160   
32     144    
256    16     
144    416    
-256   -16    
-288   176    
912    -96    
-784   -144   
320    16     
576    96     
144    -80    
-480   -3072  
896    -208   
-560   16     
416    32     
-64    80     
208    80     
-80    224    
400    368    
-224   480    
-112   128    
112    -224   
-16    -80    
80     192    
-48    0      
176    -48    
-256   -64    
128    -112   
-48    -64    
656    64     
272    160    
-400   240    
320    368    
96     -192   
16     160    
80     -80    
64     256    
-1136  -144   
816    144    
-48    -128   
-368   -160   
240    -1072  
160    512    
400    272    
0      288    
144    64     
-192   -368   
128    128    
560    256    
-160   464    
-368   -336   
528    -208   
-16    48     
-160   -592   
192    -304   
-288   352    
144    -112   
400    -1312  
-160   32     
-160   -400   
144    320    
-448   -128   
224    -544   
-256   288    
80     -336   
128    112    
160    -1952  
-1360  432    
1488   -448   
-864   16     
64     -48    
16     128    
656    416    
208    -64    
-432   -224   
208    -80    
-16    -80    
272    -96    
-176   -224   
144    -1040  
-32    480    
96     -1536  
-144   -208   
16     160    
144    96     
64     -352   
176    1536   
624    -464   
-960   -144   
288    -192   
160    -128   
-352   -96    
80     0      
48     352    
-320   16     
-32    16     
272    -464   
336    -176   
-304   -736   
-144   96     
320    16     
208    16     
-368   224    
240    32     
-144   80     
272    -320   
-224   -128   
48     -256   
-48    48     
224    -176   
-208   -64    
64     -352   
48     32     
128    -416   
256    64     
592    640    
-1808  768    
976    -32    
64     -192   
-688   -544   
800    336    
-416   144    
64     128    
112    -80    
-288   -112   
176    -48    
336    0      
-192   112    
-192   -384   
-16    -64    
320    -240   
-240   144    
144    -48    
304    80     
-32    0      
-32    128    
80     -800   
-832   944    
1696   272    
-1648  256    
-480   80     
672    -64    
-1120  384    
464    -272   
-400   -368   
304    -736   
288    240    
-352   -64    
144    128    
368    80     
-48    -80    
-320   64     
48     -336   
-496   -80    
224    0      
208    112    
224    128    
-224   288    
32     -848   
-16    512    
80     -304   
-992   -1440  
384    240    
352    464    
-800   -64    
512    -224   
160    -80    
0      80     
-112   -128   
624    -80    
112    160    
-592   -32    
448    -640   
-48    64     
576    496    
304    -224   
-32    96     
-192   112    
32     96     
208    -240   
176    224    
192    16     
-192   -16    
368    336    
-64    224    
-2048  -800   
1536   -528   
1520   688    
-1616  -320   
-368   -1232  
720    -848   
704    -16    
-480   1728   
-144   544    
16     240    
480    -576   
160    480    
-336   -240   
-32    256    
-80    -272   
352    -112   
80     -352   
-64    224    
0      -128   
-96    -112   
-240   -160   
-416   272    
48     -96    
-368   -32    
144    48     
-336   768    
160    624    
176    -624   
-96    -848   
80     624    
32     -96    
144    -608   
32     320    
-528   -96    
240    -336   
96     -960   
-560   -176   
320    64     
112    -976   
-112   -592   
-128   496    
96     272    
-112   16     
144    240    
16     256    
-80    -384   
-128   -48    
352    1008   
-176   -544   
32     304    
-256   -96    
416    -48    
-912   944    
704    784    
32     576    
-48    -32    
80     80     
-208   -1024  
480    -32    
-480   -176   
64     384    
-48    64     
0      144    
96     -176   
-32    96     
-176   -336   
-304   -528   
112    272    
-64    1360   
-352   608    
32     -352   
288    -192   
-400   160    
144    96     
-1696  64     
16     256    
-96    384    
-16    352    
-688   576    
-176   -64    
336    -208   
496    -432   
-976   224    
-160   832    
144    1152   
-64    656    
-64    -432   
16     -1088  
-48    272    
-640   496    
112    -272   
304    112    
-16    256    
-288   -160   
-144   336    
80     -80    
48     -144   
128    160    
-336   16     
-80    48     
224    -144   
160    -752   
-704   -80    
528    336    
-512   352    
-304   352    
320    -1200  
80     640    
160    128    
-32    1024   
144    -384   
-64    208    
-112   -176   
-144   320    
192    160    
192    -192   
-384   64     
0      -128   
16     -80    
-112   -192   
-96    480    
-96    -32    
288    224    
-336   32     
160    32     
-448   160    
624    -16    
-320   144    
16     -32    
16     304    
-256   -624   
-784   1408   
2640   320    
-1104  224    
-96    32     
448    -176   
16     -512   
16     32     
-128   224    
-128   416    
128    80     
-368   -48    
176    80     
-96    208    
192    80     
-256   96     
288    -16    
-272   160    
-112   96     
-96    128    
144    0      
-80    0      
624    -336   
-1440  160    
1376   -272   
-608   144    
-112   48     
48     128    
64     -128   
640    112    
-352   48     
-304   -16    
16     -64    
64     32     
-80    80     
-64    -224   
-160   208    
400    -64    
-448   -144   
368    -80    
-128   0      
-96    176    
176    192    
-592   336    
208    -272   
-272   112    
32     144    
112    -80    
512    240    
336    -224   
-768   0      
-208   112    
336    224    
144    128    
-48    224    
-224   80     
-560   -464   
448    -656   
144    -112   
-144   352    
-336   256    
-368   320    
320    240    
496    -16    
-304   -272   
-384   112    
528    -144   
-192   32     
384    0      
96     208    
-1680  -368   
3184   -1296  
112    496    
-1040  -416   
400    400    
192    224    
32     -160   
-128   64     
80     336    
-48    48     
-112   416    
-240   -32    
512    80     
128    144    
16     -16    
224    112    
-320   48     
240    176    
400    48     
-288   -480   
-864   -192   
768    16     
-544   -32    
720    160    
224    16     
-592   -48    
80     288    
432    -128   
-48    -48    
272    -176   
-192   272    
416    96     
-304   272    
224    16     
16     192    
208    0      
208    128    
0      304    
-32    224    
-384   64     
272    208    
0      -64    
48     32     
-144   -48    
112    16     
-32    0      
144    32     
160    64     
-288   -352   
-64    -32    
48     -64    
80     48     
0      -736   
-736   -368   
224    -48    
336    -2544  
496    48     
-240   32     
-96    112    
80     80     
48     -176   
-112   0      
-48    -48    
-32    -112   
224    416    
160    48     
-128   64     
208    80     
-160   -400   
240    -656   
-32    -288   
-48    336    
48     -48    
-48    -192   
32     -80    
80     64     
64     -704   
-112   48     
0      256    
240    352    
112    48     
608    2048   
-2464  1200   
1632   -528   
288    -192   
96     -1264  
-320   288    
32     1024   
-96    192    
224    -64    
176    -144   
-208   208    
16     192    
240    -32    
-112   -48    
-112   -1024  
64     -240   
240    32     
64     -96    
208    336    
-192   -576   
-32    368    
640    752    
-64    160    
-512   480    
528    -240   
-560   -464   
224    32     
224    -64    
48     224    
-272   -48    
48     -240   
112    -560   
192    -192   
-16    288    
-336   -80    
480    240    
32     112    
-144   144    
32     -832   
-48    -160   
208    0      
112    80     
0      128    
-144   -48    
128    -80    
16     -80    
-64    96     
80     176    
64     96     
0      -320   
1232   688    
-2176  -448   
272    -688   
96     -464   
-1216  176    
1648   -224   
-256   304    
-208   -32    
-240   -464   
352    -384   
64     -1008  
-304   -144   
208    -112   
208    -496   
-560   -544   
224    -208   
128    -160   
-160   496    
208    768    
-32    464    
-48    320    
-368   -880   
592    192    
944    -688   
-1952  -384   
752    496    
656    -128   
144    -1360  
-720   -1312  
208    -544   
320    -160   
48     -32    
-96    48     
-112   -176   
32     -928   
32     -384   
-32    -144   
-272   -816   
-1008  -528   
496    -320   
-208   -528   
48     -1184  
-112   -336   
112    -1712  
-352   -768   
-224   -608   
864    -1040  
-448   -240   
-80    544    
128    -864   
16     32     
160    -112   
32     -640   
-528   -480   
784    -512   
-208   48     
-304   -144   
48     -848   
-560   -800   
704    -736   
96     -16    
128    240    
160    -240   
-144   -96    
-176   -272   
368    -112   
352    -112   
112    48     
176    336    
-128   48     
-640   -976   
1248   -1168  
1408   -80    
-1200  -416   
-352   128    
256    -2496  
304    -32    
400    1504   
-992   -320   
-48    -928   
368    48     
80     672    
64     -544   
-192   96     
-64    -592   
288    112    
-64    144    
272    48     
80     -320   
-256   -560   
160    -1296  
-176   144    
-32    -304   
-432   160    
624    -416   
-144   -96    
16     -368   
160    -208   
-768   -592   
192    800    
368    176    
-64    -176   
48     -176   
-112   -464   
32     144    
288    464    
192    80     
-176   -1136  
272    224    
224    -832   
-448   -1648  
-16    -896   
16     -112   
368    400    
-656   -336   
-48    -272   
352    -112   
160    -480   
-736   -1584  
80     272    
528    -48    
480    1040   
-1216  -288   
192    -208   
704    512    
-368   544    
-208   160    
272    1184   
-32    576    
-16    -768   
-544   -816   
-32    192    
-32    208    
-80    -288   
32     -608   
-64    -688   
-128   528    
432    -48    
-16    -336   
-592   -1056  
320    -400   
-208   256    
256    320    
-16    288    
-144   -576   
-16    -1104  
80     -96    
-160   -416   
592    -432   
192    672    
-16    -400   
-752   720    
1472   -544   
-800   848    
64     -352   
208    -400   
304    -384   
-320   -336   
-208   -192   
144    -112   
-48    416    
16     192    
32     96     
-48    -96    
-32    592    
144    -16    
128    -16    
32     64     
144    -192   
-224   -32    
-1152  -80    
160    256    
-288   -800   
-208   128    
592    128    
-592   -352   
288    256    
96     160    
144    -880   
-64    528    
128    -144   
-96    352    
-240   -224   
-32    144    
32     -48    
-448   -80    
48     256    
64     -64    
112    -48    
-240   0      
-32    -48    
-320   -16    
-144   112    
96     -48    
-256   -96    
-160   32     
400    80     
-112   112    
0      -48    
-240   16     
-480   -768   
1472   -464   
-656   -96    
-624   -192   
224    -160   
464    480    
-432   352    
48     400    
336    -16    
-64    16     
-272   -208   
240    64     
-112   -64    
96     272    
-320   -64    
0      192    
112    -32    
-288   16     
-208   16     
-32    96     
-224   -96    
-64    -320   
1152   976    
-80    -48    
-112   320    
272    -176   
-208   176    
-352   208    
240    -96    
432    -224   
-320   96     
-208   -16    
-224   64     
192    96     
208    -32    
64     160    
-656   -112   
112    368    
-176   112    
-64    -32    
560    -176   
-256   -48    
-304   -96    
-112   256    
400    448    
-1504  -192   
-320   16     
256    -448   
-976   -96    
48     -48    
512    288    
-432   48     
-288   208    
-160   -48    
352    128    
-384   192    
320    -128   
-672   -32    
0      -96    
-48    -64    
416    128    
-544   96     
-80    32     
80     224    
64     -96    
0      272    
-368   -160   
32     400    
96     -192   
-224   112    
-688   1328   
2032   -1376  
-1824  128    
1712   -864   
272    256    
-1456  480    
416    128    
-96    96     
320    -48    
-288   -176   
240    208    
80     32     
-64    -32    
-576   0      
64     0      
-128   112    
128    128    
208    16     
-80    112    
-416   112    
608    480    
-496   560    
208    -64    
320    -144   
-32    16     
96     64     
-288   48     
-32    -208   
-208   -16    
208    -112   
80     112    
-192   16     
112    -96    
-272   -80    
320    -224   
-384   -272   
288    -144   
-288   208    
80     368    
144    224    
-80    144    
-32    -208   
128    64     
-192   192    
128    208    
160    160    
-320   -96    
-32    80     
192    -32    
-32    320    
240    368    
-96    240    
-112   -304   
-192   272    
592    -96    
-432   32     
-224   -16    
464    1360   
560    1088   
64     304    
16     64     
-240   64     
64     96     
144    224    
0      352    
-112   192    
224    176    
-272   -112   
16     -128   
-96    -368   
48     -432   
-192   -192   
144    64     
-176   -16    
-64    0      
-16    -96    
256    -112   
80     768    
-240   432    
0      304    
-64    -96    
-368   -2208  
-64    -512   
-624   288    
-64    0      
400    -144   
-224   -208   
96     80     
96     96     
-96    -736   
192    -128   
-144   176    
-48    128    
176    80     
208    64     
-304   128    
208    336    
-128   -48    
-160   304    
-32    -496   
80     80     
496    96     
-832   1248   
528    -208   
-304   -432   
464    272    
-176   608    
-192   -384   
192    176    
64     144    
-80    -112   
-160   448    
-160   208    
304    336    
-16    -736   
-272   -336   
48     192    
224    464    
-176   480    
224    -640   
96     352    
-272   304    
-224   -176   
96     176    
432    192    
-240   64     
-352   208    
-64    192    
448    16     
544    256    
-816   608    
-1152  1520   
3376   -784   
-1232  416    
-496   64     
1152   -416   
-144   256    
176    112    
0      512    
-96    -64    
32     144    
96     0      
96     -80    
-80    304    
144    464    
64     -336   
80     256    
192    -1456  
-320   -80    
224    112    
-32    -80    
656    1344   
-1216  -592   
-544   240    
1648   848    
-352   240    
-240   -240   
128    736    
400    2032   
-144   2016   
608    -352   
-368   -880   
-352   -976   
352    400    
128    -128   
-160   -304   
-16    144    
-96    80     
240    272    
368    384    
-128   -48    
-48    -320   
-176   -192   
-48    16     
144    -464   
624    -1216  
-880   352    
624    1776   
576    400    
-448   1008   
272    240    
-368   -544   
672    480    
-336   -368   
-544   384    
320    -192   
-448   368    
1008   1568   
-1008  944    
-32    288    
496    -240   
0      416    
-416   16     
-400   -592   
176    -912   
-176   -320   
96     -720   
400    208    
0      448    
112    448    
-64    144    
-1008  -560   
-320   64     
-496   -752   
-448   -592   
384    -1056  
128    -256   
-16    128    
-464   256    
-320   -560   
480    -400   
336    0      
-352   240    
-256   544    
272    -288   
272    -240   
-48    144    
16     224    
-112   304    
320    1072   
288    -272   
-240   176    
64     -272   
160    96     
-400   -192   
864    160    
-272   768    
272    384    
-112   768    
224    912    
176    944    
176    96     
-224   -320   
-128   32     
336    416    
368    32     
-224   448    
112    368    
64     352    
176    384    
160    128    
64     -80    
-96    -16    
448    -160   
-448   -464   
304    -1216  
96     -640   
80     -2592  
-160   -960   
96     -368   
80     -144   
-208   0      
608    -720   
176    1200   
-480   528    
320    1184   
448    384    
-256   -320   
-320   -432   
384    -688   
144    144    
400    256    
-256   -464   
32     560    
144    -128   
96     -160   
-64    -304   
48     176    
304    400    
96     1008   
448    272    
-336   16     
96     -112   
-16    -64    
64     48     
64     -368   
-816   -432   
240    -928   
80     -1248  
-160   -1472  
96     -48    
176    -2880  
-656   736    
832    48     
-528   -112   
384    224    
-144   -384   
-384   272    
288    -112   
-384   160    
528    48     
-576   -64    
-16    -368   
48     16     
64     -528   
16     -288   
-32    -640   
-16    -304   
0      -464   
208    160    
-96    -96    
-240   80     
160    1168   
1440   -112   
-1376  -256   
720    80     
-80    -192   
-256   32     
176    -112   
272    176    
-16    320    
-304   64     
96     -112   
304    -400   
0      -64    
32     -144   
160    0      
96     -32    
-208   48     
272    -16    
-32    -48    
-128   -80    
-208   96     
368    32     
64     192    
-48    -144   
-272   -144   
128    144    
240    -144   
-128   80     
-192   -1392  
96     2480   
1600   96     
-1200  -144   
304    -272   
416    128    
-1040  -32    
448    -432   
-16    -320   
-320   -384   
-512   -96    
208    -112   
256    -16    
-48    -224   
-96    -128   
-544   -400   
704    128    
-384   -48    
336    16     
-256   -64    
96     -16    
112    64     
-144   -288   
-1440  528    
1584   -160   
-1760  0      
752    -16    
352    -32    
-640   -192   
704    -128   
-400   -432   
96     48     
112    112    
64     16     
-80    48     
112    -176   
-208   64     
16     -224   
144    320    
-176   112    
-64    48     
-208   -144   
-16    272    
192    -464   
-208   208    
400    -304   
-96    544    
128    832    
96     -176   
304    256    
208    80     
-688   -176   
240    -80    
112    -128   
32     -144   
-320   192    
496    -144   
-528   448    
208    576    
-640   384    
-224   -176   
-480   128    
368    -112   
-624   0      
64     32     
-176   -32    
336    -160   
192    48     
-272   0      
16     -224   
544    1360   
-2304  -2368  
-976   704    
1888   320    
-688   -208   
448    288    
320    96     
-688   208    
-352   -16    
80     432    
480    -64    
-624   208    
48     -112   
64     176    
-64    -288   
-64    176    
112    -80    
-272   144    
368    -112   
480    592    
-672   1344   
192    480    
256    48     
-384   -208   
16     96     
-64    0      
-320   0      
-1120  160    
-464   240    
-208   416    
368    160    
-352   48     
256    160    
-96    -224   
208    0      
-448   288    
464    384    
0      48     
128    304    
32     32     
-496   -32    
288    48     
-320   32     
128    -64    
-112   -464   
-400   -256   
64     432    
400    1056   
112    112    
-304   0      
240    144    
-64    -256   
-192   -672   
-240   0      
240    560    
-256   368    
416    352    
80     576    
224    432    
-896   176    
-208   352    
400    144    
48     224    
-96    256    
128    688    
-112   720    
368    176    
32     352    
-256   480    
-336   -128   
240    -592   
176    -16    
-288   64     
-144   320    
-576   -32    
144    80     
176    32     
-224   0      
160    704    
-160   -160   
112    272    
192    -80    
-1008  1024   
656    -288   
192    224    
-768   1312   
320    320    
368    -400   
-368   448    
-656   -176   
512    -320   
-80    -496   
32     -32    
-80    -96    
-32    -16    
80     272    
112    -48    
-272   112    
-80    -240   
80     192    
0      -32    
-32    256    
-752   608    
752    128    
-624   -80    
0      -80    
0      -144   
176    -176   
-208   160    
-112   480    
-96    160    
160    -128   
-48    16     
-32    -96    
0      272    
-240   -16    
192    0      
-240   208    
32     0      
-128   -656   
64     -48    
432    128    
-48    64     
-128   240    
-176   64     
224    160    
-96    -176   
32     -32    
-256   144    
-192   160    
320    -16    
-512   -288   
1008   -704   
256    640    
288    -896   
32     -256   
-272   -176   
-224   -224   
-128   768    
368    -816   
-112   96     
-272   -192   
-32    224    
336    464    
-64    -128   
-128   -176   
-32    -160   
0      448    
256    256    
-432   256    
240    -1184  
-48    528    
320    -576   
-2048  416    
1344   176    
-608   544    
64     1104   
544    1152   
96     1168   
-1248  720    
0      -720   
448    -992   
-576   -944   
-64    -496   
48     -864   
-416   -368   
-80    -144   
80     128    
352    816    
-608   512    
32     272    
160    112    
48     288    
-32    144    
0      128    
-192   288    
640    896    
0      704    
240    112    
-528   -1344  
112    -784   
464    64     
-368   256    
48     192    
464    608    
-432   448    
256    -96    
544    -96    
336    2432   
-1168  1552   
-272   208    
496    -400   
-208   64     
-16    64     
-496   -80    
448    -416   
-192   -384   
0      -144   
80     272    
224    -240   
-160   320    
-656   -928   
832    -1088  
1232   224    
-544   320    
-1136  416    
-32    576    
1184   -1760  
-640   -1696  
-384   -192   
-96    192    
528    144    
368    128    
-432   48     
-256   240    
32     -176   
816    160    
64     32     
-512   128    
64     704    
176    1328   
336    880    
-176   -16    
-80    -352   
-32    64     
-480   -112   
1008   -32    
-320   -128   
-176   80     
192    64     
96     -64    
288    -624   
-160   -352   
-32    16     
32     528    
-192   -16    
112    -128   
304    128    
-160   -384   
64     -80    
320    -2576  
-32    144    
-80    80     
96     240    
208    128    
-368   80     
64     144    
320    -304   
-288   -64    
128    512    
592    224    
32     80     
-208   -192   
352    -768   
-400   48     
64     -752   
64     -48    
-80    144    
256    320    
-192   288    
128    16     
32     -192   
32     112    
-32    -16    
48     112    
96     48     
-48    0      
32     144    
96     -80    
-80    -16    
176    560    
416    -48    
-400   -896   
144    128    
0      -32    
144    160    
384    752    
-880   560    
256    -288   
176    144    
-128   -176   
-16    -320   
-896   -800   
1888   -720   
-192   -16    
-944   -368   
800    368    
240    -960   
-592   512    
32     -224   
0      144    
176    16     
32     96     
16     -272   
-64    304    
208    464    
80     -192   
-128   -144   
288    -160   
-240   320    
112    -352   
112    64     
560    1024   
-1088  -240   
-480   320    
1200   -304   
-80    -192   
-336   192    
-240   -144   
512    192    
48     288    
288    -272   
-432   128    
-16    -464   
224    160    
288    -176   
-528   144    
160    16     
128    -32    
192    -112   
-112   176    
208    -16    
-176   208    
-80    48     
-48    48     
64     32     
480    -128   
-800   64     
528    -32    
-112   64     
-48    -80    
32     -240   
208    -1104  
240    912    
800    -16    
-656   -224   
192    128    
464    -112   
-592   -208   
240    144    
112    -304   
-112   -112   
96     -272   
144    -16    
16     0      
96     16     
64     16     
-240   -32    
432    -1840  
-208   -96    
112    -80    
240    48     
-240   -64    
560    64     
1136   -224   
-992   -288   
1120   160    
-144   -16    
-352   64     
368    -160   
528    -96    
-240   64
[truncated: 740,011 more chars]
