# Supplementary material for: A Fault Diagnosis Method for One‐Dimensional Vibration Signal Based on Multiresolution tlsDMD and Approximate Entropy
Source: Hindawi journal article supplement (doi:10.1155/2019/3262818), 2019-01-01
Supplement: f1 [file 3262818.f1.zip › 3262818.f1/gear signals/pitch errors signal/Data16.txt]

176    48     
-208   80     
256    -144   
-240   -32    
144    -48    
112    -80    
-448   -96    
528    -112   
-208   32     
208    96     
-272   96     
96     -192   
-192   128    
336    -96    
-160   64     
192    0      
-240   208    
112    80     
112    192    
256    -1600  
-2688  800    
2144   576    
-224   128    
-800   -352   
176    32     
32     240    
-624   32     
288    288    
128    -176   
16     208    
0      48     
-112   96     
96     144    
192    224    
-528   144    
368    0      
-240   128    
288    176    
-368   416    
-16    272    
-64    -896   
-480   736    
1152   64     
-1040  832    
-64    1264   
176    160    
160    -80    
-512   112    
16     -16    
192    -32    
448    32     
96     -272   
-624   336    
256    -64    
-432   192    
448    -32    
-256   -80    
-192   192    
400    384    
-160   -64    
112    160    
-160   -336   
288    -208   
-16    480    
112    -144   
-224   1088   
-1024  592    
368    -240   
-512   -288   
80     -832   
112    288    
-16    160    
256    16     
-176   -608   
-672   -176   
288    -160   
464    592    
-512   240    
96     -352   
560    -496   
-256   208    
96     48     
-48    400    
-224   -16    
272    -480   
-544   496    
-16    -64    
-160   304    
448    -144   
-608   -1056  
1200   -848   
480    624    
-992   784    
-32    176    
240    -560   
128    -624   
80     1040   
-160   -1440  
-464   -752   
336    -176   
144    128    
-160   -96    
-176   96     
-16    224    
464    512    
-224   176    
192    288    
-16    -368   
-112   -80    
0      112    
192    288    
160    160    
-848   176    
656    -272   
-400   -720   
384    -592   
-128   -1040  
80     -352   
-128   192    
240    -128   
32     80     
160    528    
-64    -32    
176    -368   
-64    -1088  
96     32     
208    112    
-304   272    
112    224    
304    -896   
128    320    
-80    -496   
-16    208    
-112   -480   
-96    16     
144    432    
-96    320    
272    256    
80     -176   
-96    112    
592    944    
-1648  160    
816    -656   
-96    -80    
384    -160   
96     736    
-160   -576   
-16    -1520  
-464   -1872  
96     864    
176    160    
272    64     
-192   592    
112    544    
128    -144   
256    -64    
128    -176   
-560   -144   
0      368    
16     32     
-48    128    
48     -240   
32     64     
112    -368   
-48    128    
416    -624   
-32    16     
-112   80     
208    -16    
-48    -16    
32     160    
336    -432   
-160   320    
512    -80    
-464   -400   
-176   -32    
-96    -1008  
272    -80    
-368   -688   
48     48     
-192   -32    
-16    192    
48     48     
160    -112   
-16    48     
304    -288   
-48    416    
-96    0      
96     240    
176    -48    
-32    -464   
-752   -528   
432    176    
-368   -640   
944    -656   
96     544    
-80    400    
-592   0      
240    144    
400    448    
112    -224   
-592   -256   
-80    -16    
304    16     
48     32     
112    480    
-448   -672   
240    624    
176    -832   
160    576    
-208   -368   
-144   160    
160    96     
-32    144    
240    -1168  
64     -176   
-240   -1056  
112    -112   
320    288    
-512   896    
160    1840   
2288   -464   
-1184  0      
304    -512   
-224   -672   
576    -80    
-64    -288   
-80    -400   
176    -912   
144    32     
-16    -224   
16     -240   
-32    -160   
304    -128   
-112   -176   
-80    -1200  
64     -288   
-176   -208   
-32    0      
176    -320   
-64    160    
-384   272    
1584   -144   
-480   784    
-352   -176   
176    64     
480    176    
-512   80     
896    -576   
-400   16     
96     -1248  
384    -64    
-112   176    
-112   128    
128    -192   
-352   112    
368    -288   
16     -16    
128    384    
-480   80     
-640   -80    
144    -912   
-128   32     
80     -416   
-80    -416   
192    -208   
-192   -112   
-1328  -1536  
-208   560    
1136   -256   
176    0      
-352   -16    
-240   80     
64     32     
640    1264   
-336   464    
-1040  64     
-1120  -384   
768    -416   
-240   -96    
-448   -48    
-272   48     
256    -576   
64     -16    
-176   -96    
288    320    
-304   80     
96     -112   
208    16     
-928   -592   
-784   2096   
848    528    
-880   368    
240    -144   
640    -16    
-64    -208   
-704   128    
448    -544   
0      64     
-448   448    
400    80     
-64    -160   
-32    -272   
32     -64    
32     32     
-208   -32    
112    -32    
-224   -16    
208    -144   
-2592  32     
1120   -240   
-224   0      
-144   -432   
64     272    
64     -752   
192    48     
-32    -128   
32     -160   
-32    32     
16     240    
-192   112    
448    192    
-704   -208   
112    -160   
-304   176    
672    112    
-736   96     
496    400    
-144   96     
-176   48     
384    -112   
-848   -64    
336    112    
48     224    
-32    -80    
16     144    
320    464    
-48    224    
-368   -192   
336    -256   
-224   -240   
-128   -976   
-912   -288   
624    16     
-208   -288   
288    -176   
176    -272   
-128   -160   
80     -416   
32     -64    
-176   0      
-64    -80    
144    96     
192    112    
-816   80     
-224   -496   
48     160    
-256   -192   
-368   0      
-16    -80    
208    -144   
-176   176    
-368   80     
64     -208   
-80    -80    
-208   -192   
384    80     
-144   0      
-1120  -112   
-64    64     
-880   -944   
1088   -1712  
-1968  672    
1104   -272   
32     96     
-912   16     
192    -80    
224    -112   
560    160    
-688   656    
-64    -224   
320    -208   
64     208    
-96    -240   
176    864    
-32    -144   
96     -32    
64     -192   
0      -48    
-192   64     
-176   64     
656    1680   
224    -160   
-1008  -480   
640    -464   
-400   224    
48     400    
-544   416    
112    -80    
-96    160    
-80    -80    
304    64     
-192   144    
-240   -192   
-128   -32    
480    -32    
-176   224    
-48    -80    
-32    64     
-32    80     
-32    -48    
112    -48    
-32    48     
-160   80     
-160   16     
80     -32    
128    -96    
-64    240    
-32    144    
512    272    
320    -672   
-3088  512    
1008   432    
704    -16    
-880   -224   
352    -400   
-240   96     
-208   192    
-272   304    
432    224    
112    -48    
-432   -16    
80     64     
176    160    
-64    272    
-320   256    
224    -64    
-240   32     
-48    -112   
-176   176    
32     -64    
576    944    
784    224    
-816   320    
432    240    
-336   144    
160    -128   
-128   -16    
-368   208    
-16    -176   
352    -448   
0      16     
0      48     
-96    288    
-192   192    
-208   16     
288    -32    
-144   384    
-96    -272   
-16    80     
-128   48     
64     144    
48     160    
64     128    
48     176    
64     848    
176    -592   
224    -1952  
-560   -1360  
480    -272   
112    64     
-80    128    
-112   400    
0      -224   
-528   352    
336    800    
-848   144    
304    -128   
-272   416    
-240   -240   
80     -352   
0      224    
-48    208    
-144   288    
-48    -32    
-464   -272   
96     -400   
0      528    
-352   -64    
0      240    
-320   -1088  
2048   -272   
256    512    
-1072  448    
736    -384   
-240   -1184  
32     112    
-80    -288   
-32    -256   
-240   608    
0      -16    
320    -352   
-288   384    
-16    32     
-256   -368   
432    576    
-208   496    
-32    -288   
64     -480   
-160   -592   
-80    -240   
0      832    
240    64     
448    48     
-560   -320   
-432   -928   
272    240    
-304   -368   
320    -608   
176    480    
-448   -320   
112    176    
208    208    
48     -224   
-144   -288   
0      -608   
16     -144   
112    320    
-128   528    
-144   -224   
-176   32     
576    496    
-144   -112   
0      -48    
144    704    
64     -80    
80     -144   
240    1184   
-192   -640   
-32    0      
-256   -496   
176    -720   
-320   -672   
304    -304   
-448   -336   
480    -304   
144    48     
-64    -208   
-288   -64    
32     -304   
112    160    
80     144    
0      0      
0      208    
-16    288    
160    416    
-384   160    
0      0      
576    192    
-224   -208   
368    -128   
-176   96     
176    272    
-64    -160   
128    -480   
144    -96    
0      -112   
272    -544   
160    704    
-48    416    
-176   16     
-368   1424   
1600   -432   
-1168  416    
16     352    
160    80     
-176   -160   
288    -3024  
-384   -592   
64     -144   
64     736    
64     528    
-16    -256   
32     624    
-112   128    
176    112    
32     256    
-144   304    
-48    128    
-64    -224   
160    368    
160    1136   
240    -320   
-224   -96    
144    1280   
-16    96     
128    -704   
-144   96     
64     160    
208    96     
-96    -480   
192    64     
224    -336   
-272   256    
-32    224    
176    -80    
176    704    
-256   -160   
-32    336    
144    -1808  
-80    32     
96     64     
208    368    
-144   176    
128    384    
-176   -80    
-256   144    
192    0      
-48    192    
-576   -240   
1200   -816   
-2320  160    
1792   -624   
-320   128    
-720   -432   
896    624    
-112   384    
-240   576    
112    -48    
128    112    
96     96     
-64    96     
48     32     
-160   80     
432    176    
-112   -96    
-96    128    
192    16     
176    288    
-192   -32    
64     176    
336    -80    
0      -528   
-1760  16     
1824   -96    
-864   112    
160    240    
48     -48    
-288   464    
1136   -80    
-416   -160   
32     96     
176    -16    
128    112    
-176   -320   
-64    -16    
96     -1216  
176    32     
-80    672    
48     256    
-160   16     
336    128    
80     -560   
-688   512    
352    -64    
-96    -496   
272    16     
32     -496   
-208   64     
-672   144    
416    240    
432    -528   
-288   -16    
288    0      
80     -192   
-176   112    
-224   -160   
-32    -400   
464    -320   
16     176    
-656   -32    
256    160    
496    -368   
48     352    
-416   -64    
-400   496    
768    -208   
400    -48    
-192   -80    
960    1200   
-1360  -1984  
-2032  -880   
1584   -640   
64     160    
-272   208    
-64    -320   
-16    224    
96     80     
144    -80    
208    -48    
48     272    
-256   -384   
96     -144   
144    0      
48     -1456  
80     112    
-208   -16    
272    -496   
-336   -448   
800    -464   
-192   -352   
-112   -16    
64     -272   
-400   224    
720    -208   
-736   -64    
496    -96    
160    -1184  
-336   112    
96     -64    
48     128    
80     -416   
144    -352   
32     -208   
-240   -16    
448    -32    
-336   -208   
752    16     
-48    -2256  
144    -16    
-32    48     
128    176    
80     -96    
144    -32    
-336   80     
288    224    
-368   128    
176    -96    
-1264  16     
256    176    
-144   48     
464    672    
-464   64     
-128   -1024  
320    -224   
-256   -144   
176    0      
-64    -80    
208    384    
448    64     
-32    -112   
-240   48     
160    32     
-176   128    
-16    144    
64     64     
240    0      
64     -16    
-80    -32    
0      -336   
64     -960   
-48    -16    
240    160    
224    112    
-96    96     
-304   208    
128    -16    
-176   -432   
16     -320   
0      -400   
-864   -448   
2048   1520   
112    304    
-1232  80     
592    -896   
-560   -1024  
304    144    
336    80     
-32    464    
-592   320    
320    112    
352    304    
0      -32    
-336   176    
64     -112   
-16    96     
144    448    
-272   240    
-16    -176   
32     -240   
128    -384   
-288   160    
112    -816   
64     -192   
96     -208   
96     -736   
-208   48     
-112   704    
112    -240   
48     64     
112    -112   
112    176    
-1392  144    
-144   -256   
144    -256   
208    48     
32     224    
-80    -720   
224    16     
-208   -592   
-80    -64    
160    112    
176    -32    
-208   -16    
-16    0      
-80    160    
288    -96    
-16    80     
80     -336   
96     192    
256    976    
320    -96    
-1424  -288   
2064   400    
-512   304    
-720   80     
928    288    
-736   -1904  
-464   -832   
320    32     
208    432    
-64    16     
-720   208    
496    32     
-528   -400   
48     -368   
464    0      
-240   -512   
-192   -624   
368    224    
-64    704    
-720   -320   
1456   -480   
32     1040   
-1104  80     
320    -320   
160    -1376  
-544   -1776  
-880   -1040  
-64    -64    
-800   608    
80     720    
224    80     
-528   -176   
-352   176    
-464   64     
64     -32    
-224   192    
80     368    
80     1136   
288    352    
80     256    
-128   -240   
256    752    
-704   1232   
0      368    
-176   -16    
400    896    
-1072  -272   
240    -1328  
240    -1072  
-176   432    
-64    80     
32     304    
-688   -640   
-32    -224   
-144   -368   
288    528    
352    240    
-272   -64    
368    -384   
-624   -160   
32     32     
0      336    
288    -16    
160    608    
480    304    
-560   -96    
240    -32    
496    304    
160    96     
-1440  208    
656    336    
-768   224    
-320   -80    
672    656    
-496   -992   
272    1392   
-304   1744   
176    -192   
576    -208   
-176   448    
-304   -64    
-240   640    
-240   -112   
384    16     
64     -240   
48     -16    
-16    48     
32     400    
-48    224    
64     -16    
96     160    
144    -48    
-704   432    
432    368    
-16    416    
-144   512    
-32    192    
-448   -1248  
224    -496   
0      96     
-224   368    
224    0      
-80    -160   
-272   224    
384    96     
208    400    
-416   -320   
112    -640   
192    -464   
-304   -208   
-16    144    
160    192    
-304   176    
16     -320   
-96    -1264  
-176   -576   
-192   32     
96     416    
160    32     
-592   -352   
720    -320   
-432   80     
-256   528    
208    400    
-240   -448   
-320   -480   
240    352    
-112   1072   
160    832    
-288   416    
0      272    
-128   32     
16     -48    
-16    -240   
-96    64     
96     -96    
-544   -464   
-160   0      
496    -48    
-352   80     
0      256    
64     240    
-416   0      
496    48     
-800   48     
-32    -352   
96     -112   
96     192    
112    272    
-208   -2112  
-544   -304   
608    -848   
-960   -64    
912    736    
-384   528    
64     608    
-64    112    
-64    -672   
-64    -432   
-80    -336   
-112   -192   
-16    80     
64     192    
64     320    
-64    -128   
-112   -560   
0      -736   
0      48     
48     -16    
288    1040   
-992   208    
560    192    
64     -240   
-480   0      
304    -384   
-272   192    
176    400    
64     -16    
112    352    
32     -64    
-320   -48    
32     48     
208    112    
-288   64     
176    240    
-128   -144   
208    192    
-304   -64    
336    288    
-112   80     
-288   64     
272    128    
-176   -64    
368    80     
-112   80     
-432   80     
560    64     
-240   224    
-1040  -128   
-256   -864   
4784   1456   
-352   384    
-1776  16     
1600   368    
176    -352   
-1248  -128   
944    -144   
-352   -48    
-192   96     
160    96     
112    192    
96     128    
128    160    
-208   -96    
288    128    
0      128    
-240   32     
-96    80     
128    -96    
-48    208    
-688   -288   
1648   240    
512    304    
-1408  48     
-224   240    
1056   224    
-544   144    
16     304    
48     -240   
-32    128    
-64    32     
32     144    
240    80     
-832   -16    
480    -16    
16     -96    
-304   240    
416    240    
-416   48     
144    192    
240    256    
-288   -400   
-336   464    
1296   -208   
-144   800    
128    400    
-304   16     
144    160    
336    -800   
512    -48    
-16    224    
-384   176    
144    32     
192    384    
-32    -704   
-32    -240   
624    1296   
-192   112    
-224   -576   
368    240    
-16    -208   
-32    32     
-80    208    
-208   -816   
688    400    
352    -48    
-96    80     
-176   112    
672    656    
-2144  4160   
1568   128    
-272   -576   
-1872  -576   
848    -48    
880    432    
-320   -48    
-400   320    
-272   304    
320    32     
528    112    
-208   -1776  
-64    176    
-288   96     
560    304    
-208   48     
-112   240    
-64    -48    
160    336    
256    -432   
-416   416    
640    -160   
-752   16     
512    128    
64     -128   
-128   256    
208    -608   
-304   -32    
576    -352   
-272   -224   
32     -704   
16     208    
144    -32    
208    64     
-176   288    
112    112    
80     80     
416    -496   
224    -112   
-48    -288   
64     176    
-240   -112   
384    176    
-128   -448   
368    0      
32     -240   
16     0      
-240   -432   
16     -112   
192    -64    
-48    160    
160    -192   
-688   -48    
784    1344   
-464   1744   
480    384    
-96    -1008  
-80    -16    
112    -448   
160    -160   
80     -256   
64     -48    
-64    48     
-16    -208   
-320   -416   
96     -304   
320    144    
112    -128   
-96    -16    
96     176    
128    752    
208    -1072  
32     -64    
320    368    
-256   416    
544    144    
-384   -336   
-192   -112   
48     560    
256    736    
-48    -176   
816    1664   
32     -160   
-1056  -432   
688    -48    
192    -208   
128    1056   
-320   1072   
208    -880   
-48    624    
-32    -352   
224    112    
-208   176    
-176   -32    
176    272    
48     -16    
-128   320    
0      -224   
96     96     
32     112    
-320   -288   
960    -544   
-272   336    
-384   -1152  
368    -1488  
-176   288    
528    -832   
-704   -800   
-16    -432   
64     -64    
48     -592   
64     -208   
-32    -464   
96     -1104  
256    -160   
176    -16    
320    -16    
-576   0      
-192   -656   
384    -496   
240    256    
-112   -384   
-48    192    
-256   -304   
208    -160   
64     48     
-96    -32    
16     0      
112    -80    
0      -160   
1328   -1568  
-1104  464    
-2048  -304   
2176   16     
-352   864    
-624   -16    
560    704    
96     288    
-368   -160   
208    400    
-896   -288   
-240   -112   
208    -112   
176    -48    
-352   -48    
-32    -336   
272    -96    
-112   -160   
-64    224    
240    -48    
-336   -272   
1088   704    
-128   64     
-256   -864   
144    -480   
-416   320    
480    112    
272    352    
-48    864    
288    -208   
-112   -1744  
-144   -80    
208    -912   
288    304    
-80    736    
544    608    
-272   -96    
80     -240   
-144   64     
0      32     
192    224    
-16    -48    
-1136  1056   
560    432    
224    960    
-240   1104   
128    272    
-176   864    
1120   1120   
0      848    
-80    -48    
560    32     
-48    -224   
96     -288   
-496   800    
992    -416   
176    112    
256    560    
32     176    
16     640    
496    112    
-256   -96    
208    -800   
-224   -80    
256    416    
32     176    
-400   272    
-208   -352   
16     16     
16     -160   
880    2352   
-480   1072   
-32    -384   
1200   -832   
-1792  -96    
-112   96     
464    480    
32     -32    
128    1424   
-224   64     
128    -816   
352    -320   
-96    -160   
-688   272    
-96    256    
-272   -48    
368    -192   
-384   176    
32     672    
-400   704    
352    -576   
320    -400   
-432   -384   
-416   48     
384    -1088  
64     -48    
112    -544   
16     -992   
-352   -208   
224    -288   
-112   -208   
144    -96    
192    -272   
32     -384   
128    -528   
-64    32     
192    624    
-128   -416   
-160   -96    
-96    128    
48     240    
112    144    
-64    -224   
128    -128   
64     -384   
-96    -912   
-16    -496   
112    -240   
96     -832   
-416   -592   
-80    -640   
240    -368   
-1504  -304   
448    160    
176    192    
-336   -176   
272    -160   
-1376  -192   
240    192    
-304   288    
144    80     
144    16     
-272   176    
0      96     
256    192    
-208   -560   
144    -144   
-192   -592   
256    -896   
-288   80     
-128   -320   
-512   -432   
208    -256   
64     -96    
-304   208    
240    464    
-432   64     
-256   -128   
144    -416   
0      48     
-336   64     
224    -2512  
-1392  848    
1568   -224   
-640   144    
-400   16     
48     160    
544    192    
-288   -384   
-496   256    
240    112    
-352   0      
272    96     
-144   -144   
80     -128   
-96    240    
-400   256    
400    -16    
-288   -336   
32     -272   
-96    256    
320    1360   
528    -368   
-976   -112   
608    -144   
-64    -272   
-1344  272    
240    0      
16     144    
-208   0      
-144   -224   
320    80     
-128   144    
48     -32    
-96    144    
-112   -32    
224    -144   
-64    -96    
112    320    
-192   32     
-160   48     
224    -32    
-80    160    
-16    -32    
-320   32     
496    -64    
-624   -144   
352    240    
96     48     
-272   -16    
-160   336    
-224   832    
-112   384    
-16    -256   
-608   -512   
544    304    
176    -112   
-192   272    
-336   -112   
-80    208    
128    48     
-336   48     
432    80     
-64    -32    
-544   -176   
352    128    
-64    64     
-224   80     
352    16     
-48    -112   
-224   128    
-128   -64    
-1248  400    
1152   160    
-592   -512   
-1392  240    
1904   0      
-752   -160   
288    -16    
272    144    
-304   48     
288    80     
48     176    
-192   -16    
-256   -176   
-128   96     
304    -32    
-96    160    
-16    496    
96     336    
64     0      
-112   -368   
912    16     
-752   -64    
368    352    
240    48     
-832   -368   
-48    -576   
64     64     
-208   320    
112    64     
352    -128   
160    192    
-160   176    
64     400    
-816   192    
288    -304   
-160   -272   
-112   -112   
656    368    
-496   -80    
176    32     
0      -64    
-96    160    
-16    -176   
352    256    
-240   -112   
-112   176    
240    -16    
64     912    
-1712  -1344  
64     1392   
1344   512    
-1040  -336   
560    304    
48     240    
-400   96     
-48    -16    
80     208    
176    -224   
-128   304    
320    -96    
-256   160    
-48    128    
288    0      
288    96     
-224   80     
-128   64     
-128   -240   
448    -1536  
-32    144    
160    544    
-288   272    
-304   0      
592    -256   
-448   -112   
256    -192   
48     176    
-224   160    
320    544    
-96    -48    
160    80     
-48    160    
80     176    
-16    0      
-528   -544   
592    -368   
-160   384    
192    320    
-224   144    
48     80     
336    400    
-784   -80    
416    176    
144    336    
-208   176    
512    624    
-160   448    
112    -304   
-144   -576   
-144   80     
224    -288   
-496   -16    
736    528    
-816   448    
528    144    
368    992    
-112   2176   
96     1696   
128    704    
96     688    
128    224    
160    -16    
-16    -128   
-208   112    
272    368    
-160   -128   
112    -48    
32     272    
-16    -48    
176    -304   
-96    16     
-16    -896   
432    256    
-48    368    
272    176    
384    320    
-768   -112   
480    240    
112    0      
-240   112    
176    -608   
-560   -560   
224    336    
-384   -16    
-32    -288   
64     64     
80     272    
336    688    
-352   288    
-64    64     
144    -128   
-16    96     
-64    16     
96     416    
0      80     
-96    -128   
-80    32     
16     304    
80     -112   
208    -128   
-336   1136   
1184   -784   
-1264  112    
576    -1072  
-208   16     
80     80     
240    112    
-368   288    
-128   48     
192    -32    
320    -64    
-64    -80    
-112   240    
112    288    
224    -256   
368    176    
-112   -512   
-288   -48    
224    -640   
320    144    
0      336    
-48    128    
-80    32     
-64    16     
160    -256   
128    48     
208    160    
80     80     
-144   48     
288    928    
672    -48    
-1584  -384   
1648   512    
-128   -96    
-1168  -208   
800    544    
64     640    
-416   -912   
96     -1040  
96     -128   
-240   480    
144    -128   
160    240    
-128   -240   
32     128    
64     80     
64     752    
-128   0      
192    288    
-80    -224   
-896   -80    
2192   -384   
-688   496    
0      256    
464    832    
-288   976    
352    2384   
336    1008   
-208   608    
368    -912   
48     64     
32     -48    
-80    432    
-32    128    
240    96     
-128   -80    
80     -944   
-64    -992   
-144   -592   
464    80     
-16    -144   
144    384    
-448   -528   
336    176    
160    -768   
-672   16     
-384   -2400  
-448   -448   
864    -592   
-688   640    
272    -80    
352    -160   
-304   192    
-96    -1392  
736    -320   
-432   -208   
176    -2080  
-144   -144   
-208   -1904  
288    -1120  
112    320    
304    -112   
-144   16     
-336   64     
640    192    
-816   320    
304    -960   
64     432    
-288   752    
-144   -544   
656    -2064  
64     240    
480    -48    
-992   -2832  
-16    -16    
656    -832   
-288   96     
0      544    
416    80     
-80    -240   
16     -144   
0      -176   
80     288    
272    -64    
-80    80     
-256   176    
96     -224   
-416   -704   
672    -1888  
-352   -1184  
112    -512   
208    640    
-96    -2016  
-464   -128   
672    -768   
0      48     
0      -560   
-96    336    
144    -192   
-48    -128   
-112   -176   
32     -48    
-704   432    
-16    256    
-256   16     
336    -160   
304    -304   
-512   -1040  
384    144    
160    -176   
96     -48    
-176   -256   
-352   -80    
80     -16    
96     -224   
16     16     
416    144    
-256   80     
-80    64     
272    -32    
-96    -608   
384    -800   
-352   48     
160    320    
640    -1488  
-736   144    
32     -224   
304    80     
-176   224    
496    -128   
-528   176    
272    176    
-352   -176   
-256   -32    
0      176    
-48    -176   
-288   224    
128    -208   
256    -608   
-336   -96    
-128   96     
320    -272   
16     160    
-16    304    
-48    48     
-48    -496   
112    -144   
-32    112    
32     -112   
-144   16     
-656   -2368  
-864   432    
1520   96     
-1040  144    
752    -480   
208    -96    
-416   -176   
-432   -48    
624    128    
64     -16    
-224   -128   
-288   112    
-176   32     
304    -320   
-288   448    
96     -304   
32     -64    
-240   -64    
208    96     
32     -112   
704    816    
-1824  -192   
720    -304   
464    -112   
-592   80     
416    -80    
-432   304    
128    -96    
-256   176    
704    -192   
-368   16     
-224   -176   
-224   160    
768    16     
-240   -320   
32     32     
-192   -32    
112    256    
-192   32     
48     16     
-80    0      
-96    64     
112    0      
192    -16    
-384   -224   
-144   160    
368    -96    
-16    64     
32     64     
-256   -16    
2720   -1744  
-2752  -896   
-720   320    
1728   -160   
-1008  32     
-272   208    
544    144    
320    112    
-368   -736   
-176   80     
160    -16    
64     128    
-640   -368   
352    -80    
-592   -576   
-128   144    
176    80     
-256   -208   
128    -80    
-368   -128   
-96    0      
48     608    
304    224    
-288   816    
-560   624    
-80    -48    
-400   368    
240    -432   
208    464    
-560   -176   
-48    128    
128    96     
-48    0      
-112   0      
-224   -160   
-208   144    
-112   -48    
48     176    
-96    0      
-32    144    
-176   -208   
528    560    
-1072  -112   
256    112    
96     16     
-80    144    
304    -176   
-368   208    
304    272    
592    -64    
-384   96     
80     272    
-624   192    
-832   -640   
736    80     
-352   32     
192    80     
48     -112   
-128   192    
192    32     
16     80     
-32    0      
16     96     
-32    128    
48     352    
-272   -64    
-176   112    
288    32     
-448   -80    
128    1408   
1264   2608   
448    -432   
-2320  -400   
640    -288   
1584   416    
-1168  896    
-144   -224   
304    464    
48     -32    
-288   32     
112    -240   
-416   -256   
-128   112    
-192   208    
288    288    
-1152  224    
192    16     
-144   -304   
-64    -1152  
-464   -1344  
192    -272   
-80    272    
-144   256    
544    -112   
-656   -144   
208    112    
-256   -384   
-16    -144   
-112   -272   
80     976    
-592   -320   
-288   -304   
112    0      
64     272    
112    112    
-48    64     
-192   -320   
208    80     
176    144    
-256   0      
256    80     
-192   -32    
-208   -352   
-496   -784   
320    352    
-256   416    
176    448    
672    832    
-272   384    
-32    -80    
-352   16     
-112   544    
1424   -576   
-912   -368   
64     112    
32     -144   
224    848    
144    1920   
-272   16     
240    -432   
-352   336    
-112   -352   
96     48     
-176   128    
32     -160   
64     144    
-96    256    
32     128    
96     48     
16     0      
-112   32     
-80    -64    
208    160    
-32    0      
144    80     
0      64     
-400   320    
288    96     
208    -144   
-144   128    
-144   112    
-416   496    
1120   -320   
-832   32     
-432   -64    
240    208    
-80    -32    
-336   272    
224    -304   
-368   16     
128    192    
32     144    
176    -16    
64     48     
-384   160    
96     64     
384    -144   
-64    -48    
-32    64     
-112   160    
528    848    
-464   240    
128    -144   
704    -192   
-768   416    
112    -160   
-256   -528   
224    -432   
32     480    
192    192    
144    144    
-96    224    
-288   128    
112    -64    
368    -144   
32     112    
-320   16     
-16    320    
192    -272   
48     32     
-224   208    
64     -64    
272    -112   
128    160    
176    -64    
-256   -128   
-496   96     
160    256    
192    48     
128    -16    
-1200  -976   
-288   320    
992    -240   
-1104  240    
832    96     
-304   -1344  
-896   -912   
464    1664   
-128   448    
-416   -704   
256    -352   
-208   64     
-288   -96    
416    96     
64     160    
-96    304    
-384   192    
416    1488   
160    -48    
-112   -464   
384    1040   
-512   -976   
-1520  480    
1744   -544   
-624   -688   
336    -96    
-176   576    
192    512    
-160   -208   
80     -784   
-496   -144   
-64    240    
-64    -320   
320    32     
112    -320   
-1056  224    
608    -16    
-256   80     
544    128    
112    -16    
-352   160    
160    128    
-368   352    
-656   -3200  
-1024  -784   
976    336    
-288   128    
-752   0      
1008   -464   
-496   -96    
-144   448    
80     80     
96     -80    
208    -96    
-16    656    
-1216  528    
384    160    
-320   -400   
-224   176    
32     512    
528    -112   
-400   112    
-112   -288   
160    368    
320    -208   
-64    -384   
-544   -2032  
640    48     
176    352    
-336   -688   
-1840  -1728  
704    240    
-160   -256   
-608   256    
1328   336    
-80    352    
-1152  608    
832    -48    
-208   160    
288    -784   
-128   96     
-144   -1216  
336    336    
-112   -432   
-96    192    
224    80     
-112   80     
208    0      
0      -432   
-720   -560   
560    -144   
-160   -16    
560    48     
160    80     
-432   -272   
240    224    
160    -112   
-80    16     
240    176    
-144   -16    
-320   48     
608    144    
-368   112    
-16    288    
304    160    
176    -32    
-624   -96    
432    -336   
-208   160    
64     -480   
-80    112    
304    -80    
-240   -80    
144    -400   
160    112    
-64    -176   
96     -48    
-48    64     
112    96     
-96    160    
0      -224   
-336   -832   
-96    16     
400    544    
-144   -16    
64     128    
320    -288   
0      160    
-64    -192   
-432   304    
528    64     
-320   160    
32     32     
256    -16    
-176   208    
80     -144   
112    192    
-16    0      
64     528    
496    -144   
-256   96     
48     64     
112    96     
16     -144   
144    -304   
112    288    
-48    -1200  
96     -96    
-1008  112    
16     -1776  
1376   2640   
-2592  -928   
-80    -16    
1600   48     
-384   -432   
-320   208    
-80    -224   
512    672    
-560   -96    
240    -944   
80     384    
-352   -384   
224    16     
0      176    
-448   -48    
272    -240   
-128   16     
0      -192   
16     -240   
96     16     
112    432    
-608   -512   
416    -128   
512    -48    
-512   -544   
352    640    
-512   0      
176    -176   
416    32     
-208   -160   
16     -80    
-208   -96    
336    -224   
32     -304   
-16    32     
256    -1584  
32     -96    
-208   -352   
240    224    
352    16     
-496   256    
-112   80     
352    -48    
-208   -240   
0      -304   
-1744  -176   
352    -64    
-64    112    
400    -32    
-592   -48    
528    160    
1088   -544   
-528   -128   
0      -272   
560    96     
-816   208    
400    256    
720    688    
-144   -16    
-240   176    
-336   -32    
288    -32    
32     -80    
48     -256   
-496   -352   
512    -368   
-176   256    
224    -800   
64     528    
368    64     
-368   -192   
864    352    
144    -48    
-544   480    
-256   336    
128    -80    
96     128    
48     0      
80     -160   
-304   96     
-16    -96    
208    64     
160    -784   
-160   -96    
128    80     
112    -80    
-48    0      
128    -112   
-144   400    
288    -64    
-336   0      
352    0      
-832   32     
-432   -64    
-880   -512   
800    -656   
64     400    
-256   -528   
240    80     
432    192    
-448   64     
-672   -672   
992    160    
-208   400    
-848   -400   
688    -512   
-112   112    
112    416    
-240   -64    
96     96     
192    -304   
96     112    
-48    -192   
-48    160    
-288   -48    
672    336    
160    -32    
-112   -192   
-224   16     
-16    -1152  
-1072  -2976  
-80    -384   
416    144    
256    -672   
0      -224   
432    -1248  
-224   -256   
-208   64     
-128   464    
144    -576   
-112   -496   
-160   -64    
-80    832    
144    -16    
0      -160   
32     192    
-224   -64    
-160   -112   
176    256    
48     544    
-16    -80    
-80    -144   
-512   -336   
368    32     
32     576    
-704   160    
80     320    
512    1136   
48     320    
80     -384   
-64    -224   
32     -80    
-96    528    
16     -336   
-16    448    
-400   144    
-144   -96    
0      48     
-208   1008   
96     -64    
-464   -144   
96     288    
-192   320    
32     192    
-240   -400   
208    912    
-32    1680   
-192   192    
176    -16    
128    -96    
-384   -32    
-336   -480   
704    -896   
-80    -848   
-656   -272   
48     -240   
-144   -608   
-32    368    
-80    1568   
-592   -336   
144    -432   
272    128    
-128   -64    
16     -336   
-128   160    
-112   -224   
208    320    
-176   480    
288    -80    
-176   64     
160    -160   
32     -32    
0      16     
-80    128    
0      32     
160    -224   
352    48     
-272   48     
-80    -16    
160    160    
64     -32    
-160   -576   
-224   16     
-640   224    
176    -32    
288    0      
-144   96     
-304   -240   
-192   -128   
-96    528    
-304   144    
-368   -288   
112    160    
-144   -32    
192    0      
-16    32     
112    0      
-32    272    
-192   48     
-48    32     
-448   -480   
1072   -720   
-272   624    
112    -16    
-512   32     
48     -272   
144    -416   
112    -48    
-704   -656   
-16    192    
-64    160    
96     32     
160    64     
-208   144    
272    -272   
-48    -272   
-192   -96    
-128   480    
512    1008   
-272   144    
-432   -176   
272    -304   
304    112    
-352   80     
16     160    
-64    192    
-352   -64    
576    -48    
592    -32    
-1040  320    
384    -944   
-1680  -912   
576    -816   
-240   112    
-576   320    
496    624    
-192   640    
-688   688    
-16    -16    
-160   -96    
-64    64     
-16    96     
64     -16    
160    -208   
-96    -144   
-144   48     
112    144    
-192   480    
336    416    
-288   128    
-64    144    
144    1104   
1408   -32    
-1152  -560   
112    -960   
80     -400   
64     176    
-80    384    
192    32     
256    528    
-816   304    
144    -64    
368    144    
16     16     
-288   -80    
-352   240    
384    -112   
144    96     
-384   256    
16     16     
64     32     
32     0      
-144   -496   
-384   352    
528    48     
-192   848    
-496   864    
160    880    
-736   880    
192    160    
160    -208   
-304   -272   
560    0      
-48    112    
-112   240    
528    352    
-272   672    
464    -400   
-160   -48    
192    0      
-288   0      
160    32     
176    -48    
192    160    
-176   -16    
-48    224    
224    -16    
80     192    
-416   48     
176    1056   
1872   3888   
-2224  2672   
704    -176   
1616   -400   
-656   128    
-480   240    
304    48     
-160   -48    
512    608    
-352   304    
-128   352    
-160   -80    
544    336    
-48    -64    
-304   368    
112    0      
16     160    
416    -80    
160    528    
-544   -160   
-144   528    
1008   -112   
-704   0      
-560   -48    
432    48     
80     112    
-144   -112   
-128   0      
16     32     
-224   80     
480    112    
-80    16     
-160   32     
272    192    
-208   16     
-304   0      
384    16     
112    -112   
80     128    
368    -16    
-160   160    
272    112    
-80    160    
80     0      
-48    -48    
-16    0      
112    48     
32     96     
-192   32     
96     144    
304    192    
-96    -144   
496    176    
112    -112   
-192   -576   
-464   80     
720    -64    
-80    32     
-240   64     
-256   96     
368    144    
-288   32     
320    144    
16     -16    
-224   112    
80     80     
112    -336   
-176   -224   
240    304    
-208   176    
0      -256   
112    48     
-16    -608   
-160   -112   
96     -96    
272    368    
16     112    
144    -528   
-32    384    
-96    704    
224    256    
-320   1408   
2240   -768   
-1808  128    
288    -16    
976    -144   
-672   544    
128    -288   
-32    432    
304    -1632  
-224   -288   
416    -16    
-208   304    
-80    -288   
144    352    
368    -240   
-176   224    
-160   -16    
208    -368   
128    80     
96     176    
496    96     
-1344  384    
1280   -288   
-416   -624   
272    -224   
48     -192   
-320   80     
-160   -416   
512    -256   
-16    80     
-224   112    
96     272    
-16    -64    
208    64     
-96    240    
-64    96     
208    -96    
96     0      
192    -928   
-112   128    
16     -800   
160    -96    
-288   -64    
400    64     
-384   128    
64     320    
336    -112   
-240   -16    
-96    -80    
32     -304   
1264   448    
-800   224    
512    304    
-368   -464   
-384   512    
608    80     
336    528    
-368   -112   
-160   208    
192    48     
48     208    
-80    16     
16     128    
-240   -96    
272    0      
128    112    
-288   -544   
144    -16    
48     -160   
-48    192    
224    -272   
96     -704   
-1424  416    
896    272    
112    -432   
112    -80    
-432   240    
304    0      
-288   16     
144    -96    
-256   80     
112    -112   
176    16     
-96    -496   
-192   64     
128    128    
96     144    
-48    -144   
64     -1408  
-336   96     
-192   96     
112    -688   
-352   -304   
-144   -432   
368    -112   
-208   240    
48     288    
848    32     
-160   -144   
-320   -448   
496    -80    
-384   -128   
208    -176   
320    -16    
528    -416   
-1008  752    
64     240    
-128   32     
544    -496   
-128   48     
-272   -1104  
-48    48     
352    144    
0      -32    
-16    352    
-208   -464   
96     48     
528    -256   
-416   -1008  
-224   -304   
-928   1568   
768    48     
16     -752   
-256   -512   
720    -384   
-32    496    
-432   96     
48     -2864  
368    128    
-176   -464   
-256   144    
16     272    
272    -624   
256    560    
-272   -464   
-192   -704   
32     832    
-1104  -448   
-128   -288   
-80    -432   
-64    176    
144    -32    
128    -1024  
144    -544   
-160   -624   
80     16     
112    -96    
32     -128   
96     -16    
-272   -672   
32     256    
-16    -320   
-224   192    
288    -176   
-208   112    
48     176    
128    -496   
-320   -928   
224    736    
16     -48    
64     336    
0      -272   
-128   320    
-128   -144   
-16    -160   
384    272    
-80    -48    
0      528    
-288   -192   
336    -176   
-128   -16    
304    1088   
736    1184   
-224   912    
-80    -224   
128    -768   
48     -896   
-96    -960   
112    -1344  
-256   784    
-128   432    
-128   -320   
144    224    
112    -512   
-352   -288   
-96    -64    
208    -288   
96     0      
-96    128    
240    -480   
-144   160    
96     16     
48     320    
272    -48    
-240   -128   
-304   400    
256    480    
-224   304    
-272   176    
176    80     
-160   -704   
720    -704   
-480   224    
496    -608   
272    -384   
336    480    
-432   -96    
608    -560   
0      -32    
-144   384    
-288   16     
-144   48     
-96    -176   
448    48     
32     -112   
16     -128   
32     160    
96     -240   
224    144    
48     -208   
320    -416   
-848   128    
176    -240   
208    16     
-32    -144   
144    192    
-240   -32    
16     0      
320    -224   
-128   256    
-64    -176   
-128   -176   
48     -400   
-48    576    
-128   -368   
-384   32     
-192   -64    
-960   32     
16     304    
-336   -80    
-176   -112   
272    256    
-160   -176   
48     -272   
-304   -240   
-112   0      
336    192    
-80    -160   
-352   -96    
-80    -912   
304    368    
704    -512   
-800   -672   
800    432    
-464   -256   
-640   -32    
848    -528   
-592   -32    
0      -192   
-32    304    
208    -48    
-128   128    
-160   -416   
272    320    
288    32     
-176   192    
-48    -160   
176    -320   
-128   -144   
-80    32     
-160   -288   
608    944    
32     -32    
-496   -32    
544    384    
-528   -224   
-240   320    
432    -16    
336    -64    
-288   112    
-128   176    
-16    32     
48     0      
-48    16     
96     -48    
-384   160    
208    176    
32     -208   
48     -176   
16     208    
-432   -64    
-80    -304   
880    240    
224    -16    
0      -416   
144    -288   
-48    -48    
288    96     
240    -224   
-288   -96    
-80    -80    
-576   48     
256    32     
-1120  -272   
16     80     
112    272    
16     256    
192    64     
320    192    
32     176    
-592   -96    
272    16     
272    64     
-208   -128   
-272   -176   
368    224    
-112   -80    
464    -192   
-160   144    
-304   -1600  
-928   1616   
1088   -592   
-720   -256   
656    144    
-576   -432   
128    176    
528    -64    
144    112    
-48    -368   
-224   176    
416    -80    
-96    32     
288    -16    
-384   -64    
224    48     
-448   -32    
16     -704   
192    96     
256    848    
-816   544    
560    784    
272    -304   
-448   0      
880    336    
-880   -48    
-160   288    
672    -176   
-576   -16    
32     -224   
-144   208    
128    -32    
-144   80     
208    0      
-160   -144   
352    240    
64     48     
-224   224    
128    80     
176    0      
144    48     
-304   160    
320    128    
128    160    
-80    16     
128    176    
-336   -64    
128    208    
640    -80    
-256   -16    
128    272    
-384   96     
464    624    
-864   192    
448    192    
-144   64     
-352   -96    
256    -48    
0      256    
208    96     
-240   336    
160    192    
0      48     
-48    48     
128    -80    
-208   256    
-224   48     
464    384    
-208   -16    
-96    112    
416    96     
-96    160    
-192   -96    
112    32     
-208   64     
48     -144   
-272   -128   
208    -32    
-64    208    
-160   -448   
240    -304   
960    2016   
-1840  352    
608    64     
832    -768   
-848   -96    
256    272    
112    -16    
240    304    
-544   -48    
112    -416   
-16    144    
0      144    
256    -80    
-112   -80    
-96    -272   
96     256    
-48    224    
16     -80    
144    -16    
-256   -80    
112    304    
432    1680   
320    -176   
-896   -80    
496    176    
-112   128    
16     320    
160    144    
144    -16    
-272   320    
-240   80     
368    48     
64     32     
160    176    
224    304    
-224   368    
-208   -144   
128    208    
272    96     
-176   48     
96     96     
80     -304   
-208   -416   
336    -64    
-224   336    
192    112    
16     112    
-80    -160   
16     128    
336    64     
-288   -1360  
-1824  416    
1600   240    
-432   368    
-112   -80    
768    32     
-736   416    
272    864    
-208   320    
400    384    
368    304    
-240   144    
-144   80     
112    -112   
-384   -368   
288    -48    
-192   48     
32     -144   
256    0      
-144   -1008  
-192   -160   
1136   1184   
592    16     
-1216  192    
1376   -272   
-544   -16    
288    1168   
816    1136   
-352   64     
-32    -144   
-432   128    
544    64     
160    -544   
-128   176    
0      -576   
-240   464    
224    128    
384    784    
-16    944    
-128   544    
32     128    
288    96     
64     256    
352    1648   
944    944    
-320   432    
-144   592    
240    176    
-624   208    
192    -688   
192    -80    
192    0      
-208   256    
-80    48     
-176   -656   
-352   -608   
-96    416    
-432   -640   
64     -192   
176    -16    
0      -176   
80     -192   
128    176    
-96    576    
-80    -128   
176    -112   
-576   -544   
160    640    
336    -192   
-288   80     
-480   -1312  
1904   -1376  
16     912    
640    336    
-1296  304    
432    -48    
-16    -1264  
368    -432   
96     880    
-464   -896   
144    240    
128    288    
480    -208   
80     -816   
-224   96     
-112   208    
432    -656   
96     48     
-80    -544   
-320   -592   
208    400    
368    784    
-48    -512   
-576   -64    
816    272    
-192   592    
160    64     
-96    -192   
-96    1728   
240    720    
-32    -128   
304    112    
-112   288    
16     576    
352    464    
-80    -1424  
0      128    
128    384    
-160   -256   
0      -304   
352    -320   
-320   -272   
160    672    
-128   -352   
48     -304   
-16    -1040  
-320   768    
320    -272   
-128   -640   
656    -1424  
-480   16     
208    -128   
-752   256    
880    -32    
32     -416   
-288   -128   
-32    -144   
96     -736   
-672   -2272  
336    -1968  
320    928    
0      -336   
-48    -64    
0      -16    
-48    -1216  
80     288    
272    112    
0      416    
-576   -240   
128    -192   
80     384    
176    320    
48     -736   
-592   -48    
144    368    
48     688    
32     1008   
0      -1008  
-800   -688   
208    -416   
192    -80    
-464   1328   
992    -400   
-400   -2512  
-384   -1376  
80     -864   
192    528    
-512   304    
368    16     
96     448    
-176   -208   
-16    -16    
-80    128    
224    -192   
64     224    
128    -16    
-336   -448   
128    -304   
320    -304   
32     -16    
32     -512   
-352   1504   
320    80     
-48    624    
432    160    
-208   -176   
288    160    
-112   400    
48     -16    
-96    -240   
-752   16     
224    0      
0      -128   
-208   -96    
384    128    
-144   -16    
-352   800    
384    -352   
192    -384   
-288   16     
288    80     
64     96     
-320   -288   
-32    -144   
16     -48    
240    16     
-368   -32    
112    -80    
-48    -176   
64     192    
1648   1040   
-1392  1040   
-448   864    
1536   192    
-432   -48    
-1200  -400   
704    -208   
160    -400   
-576   80     
592    -16    
-144   -32    
-192   64     
-784   -48    
48     -192   
288    0      
-432   -32    
176    112    
-352   -160   
496    192    
-96    -48    
-64    -96    
0      -336   
1104   -352   
-1152  208    
784    -368   
-160   80     
256    -16    
-400   64     
208    -224   
352    -64    
-192   -208   
-96    192    
80     -880   
-32    80     
144    -32    
176    -176   
-304   64     
176    -144   
-464   208    
256    -128   
-512   -448   
544    80     
-480   -768   
-784   16     
1296   384    
624    -288   
-608   -144   
-224   -48    
96     624    
-272   128    
512    -48    
416    16     
-288   0      
-288   32     
144    -224   
-32    -528   
128    32     
-160   0      
-16    -144   
400    -80    
512    80     
-560   176    
-464   320    
880    -96    
208    -48    
368    720    
-1024  192    
464    288    
-224   32     
-272   -32    
304    2336   
1888   -528   
-496   1408   
224    528    
-16    112    
336    48     
-496   160    
320    -48    
48     16     
-144   -176   
-864   80     
208    160    
-352   16     
256    48     
-112   -64    
-32    -16    
-528   -128   
384    208    
-352   -304   
-672   -224   
448    -80    
-320   48     
-16    288    
272    -96    
-672   32     
704    80     
-560   128    
32     176    
128    0      
544    80     
-448   192    
-32    224    
-288   128    
176    -224   
240    0      
-240   -96    
-192   336    
528    208    
-448   0      
-80    240    
80     144    
-192   -48    
96     -48    
-384   -80    
-208   -240   
80     -32    
16     16     
80     144    
240    432    
-368   720    
192    272    
32     112    
-112   544    
560    -64    
-624   64     
432    -16    
-336   64     
-80    112    
224    -16    
-176   -400   
-448   -288   
-400   -144   
176    192    
-32    112    
16     176    
64     -96    
96     128    
-48    -192   
-208   -416   
128    -432   
-208   -224   
96     -112   
48     112    
-384   0      
-80    32     
256    384    
144    0      
-432   -144   
0      -768   
48     -272   
96     -128   
928    512    
-2448  1872   
1744   -16    
-384   -112   
-432   -1408  
32     -1040  
-480   64     
-16    768    
352    128    
80     240    
-720   240    
-64    544    
128    80     
224    -48    
-384   -48    
-256   240    
176    352    
-80    -208   
192    -112   
-112   0      
-176   -256   
256    -544   
-160   864    
400    -736   
-432   -208   
192    816    
-160   64     
64     -624   
-336   336    
32     -144   
0      400    
0      -112   
208    224    
-32    -192   
-16    272    
-160   64     
176    48     
-208   -16    
-48    -544   
96     496    
-48    224    
-96    -48    
80     -288   
32     448    
-144   160    
-272   -352   
80     256    
160    480    
16     -48    
-288   96     
336    -336   
-2832  -480   
1504   720    
-368   288    
-304   768    
320    336    
-192   -288   
-928   -1472  
448    -288   
48     896    
48     -176   
-256   -112   
-144   -64    
16     32     
112    -144   
0      -48    
-224   64     
240    32     
-80    -96    
16     240    
-528   -800   
1520   800    
-1040  -352   
-592   736    
1376   864    
-912   -208   
-368   -528   
672    16     
80     -256   
-432   -16    
-16    224    
-32    -112   
112    -304   
-304   -320   
16     -48    
-160   16     
112    112    
256    -400   
-720   -624   
240    320    
192    368    
96     624    
-80    560    
656    528    
-784   384    
464    -1008  
352    -48    
-992   608    
208    -288   
64     112    
160    640    
-208   320    
416    -64    
-144   16     
-16    112    
432    96     
-752   -864   
272    576    
-32    1312   
-448   416    
768    48     
-224   176    
176    768    
-464   720    
64     -80    
416    0      
-208   144    
64     -176   
-16    96     
192    192    
832    2192   
-768   528    
-816   -112   
1952   -1200  
-160   416    
-896   -208   
176    -1008  
800    128    
64     -32    
-192   112    
-96    192    
368    448    
128    560    
-144   16     
-112   -336   
-272   -272   
256    16     
-128   240    
-64    976    
96     480    
0      -240   
-48    -384   
-336   -256   
720    32     
-384   -1280  
-288   192    
560    160    
-272   1632   
528    896    
-304   -432   
-64    -864   
144    400    
144    -80    
48     160    
-48    48     
128    32     
-16    -208   
544    80     
-96    528    
112    128    
80     912    
16     672    
336    240    
-496   -432   
288    464    
-80    768    
128    -48    
480    144    
-320   80     
-48    -544   
-112   -160   
-144   -368   
752    -48    
-16    1984   
-1040  -1632  
-1312  800    
1376   240    
-592   -96    
80     592    
-96    304    
256    736    
48     112    
-32    176    
112    544    
-224   592    
128    112    
16     96     
-176   48     
112    208    
496    -192   
-832   -176   
112    -320   
304    304    
128    -240   
-208   32     
-112   -96    
144    -880   
-144   -704   
160    416    
-32    32     
0      64     
656    2336   
896    64     
-1072  -400   
480    240    
-80    -112   
-80    -496   
-288   -272   
-80    -1632  
-112   -128   
240    176    
-112   -80    
192    352    
144    176    
-352   -112   
368    32     
-368   400    
144    112    
64     -128   
16     16     
-64    96     
160    1216   
368    -160   
-688   -640   
880    112    
-176   -112   
-112   288    
160    32     
160    336    
-224   -128   
-288   80     
624    32     
-96    272    
-96    64     
-112   -992   
272    112    
80     -144   
144    64     
-288   -112   
144    0      
-48    112    
448    48     
-128   16     
144    256    
-144   -208   
-32    240    
16     112    
240    -176   
16     80     
-256   -272   
1104   -176   
-2720  -208   
1824   -480   
272    -32    
-640   96     
48     -864   
256    144    
208    80     
-160   80     
160    96     
192    -64    
-16    -224   
-176   -384   
240    -32    
-288   -128   
336    96     
-96    -32    
96     144    
112    -64    
16     -16    
-16    -32    
-80    -512   
-1072  640    
1440   16     
0      272    
-480   -304   
368    -752   
208    -416   
-400   -768   
-240   -80    
320    192    
656    -304   
-160   48     
-288   -144   
64     0      
-224   0      
384    -176   
-160   144    
336    -624   
-304   -448   
-592   32     
288    -320   
656    -16    
-336   -96    
288    -80    
-400   -896   
-320   -128   
688    288    
-192   -384   
432    464    
-128   0      
-128   -416   
928    -448   
-304   224    
-256   -192   
-176   -160   
752    -720   
288    -96    
-96    176    
-512   -48    
432    -576   
224    -64    
64     -2240  
144    128    
-144   32     
-48    112    
64     -16    
-224   208    
96     -16    
-64    -432   
128    -5008  
-2480  -2400  
1376   352    
272    -240   
-32    96     
304    -272   
-240   144    
-96    -144   
400    -112   
-128   0      
432    16     
-224   -48    
48     96     
-144   -80    
64     80     
160    -144   
-128   -128   
144    -64    
-96    -96    
256    -960   
-64    -144   
448    -144   
-352   -640   
-352   -32    
272    -640   
336    128    
-48    -16    
32     -160   
-64    -96    
224    -16    
-128   48     
176    96     
-64    112    
256    -176   
-1376  -368   
32     -608   
144    -320   
160    -240   
-112   32     
32     -1104  
208    208    
-32    128    
240    96     
32     272    
-128   192    
64     112    
-64    32     
-176   16     
-288   -272   
-176   224    
384    128    
112    528    
-672   160    
384    -464   
-576   -1648  
384    -640   
-96    64     
-112   608    
-96    224    
32     416    
-32    144    
656    880    
-784   320    
32     464    
608    400    
-32    96     
-112   0      
-48    0      
304    416    
16     -272   
64     -160   
-272   -272   
208    -32    
-48    224    
-16    336    
-16    288    
304    336    
-96    -304   
112    -64    
-64    -144   
0      -16    
-752   96     
1120   -1168  
-832   496    
-16    720    
-224   -384   
-272   -496   
-880   -208   
-48    -32    
96     112    
80     272    
64     -224   
-288   208    
-192   208    
64     32     
-272   -208   
-112   192    
-416   112    
64     160    
-48    192    
-144   0      
-160   -608   
-176   -496   
176    176    
-832   -480   
544    176    
48     144    
-384   1216   
464    336    
-352   80     
-288   -288   
304    64     
48     -96    
-64    96     
16     32     
32     -64    
160    336    
-336   -80    
-96    -128   
-176   -64    
384    -160   
-224   48     
16     32     
-384   -112   
-112   288    
96     -80    
192    -48    
-208   -400   
-112   -96    
160    256    
-448   -432   
928    -32    
864    400    
-864   48     
704    -592   
-128   -96    
-464   -96    
624    496    
-928   -816   
-80    -320   
176    848    
-32    320    
-192   -848   
48     208    
-128   48     
192    128    
-80    0      
64     128    
-432   224    
-64    -80    
256    224    
-448   -960   
-464   560    
960    -720   
-704   80     
720    688    
-384   1120   
480    1136   
-336   1472   
400    288    
-144   -1056  
-160   -288   
112    -448   
-288   -224   
48     -192   
384    -176   
-800   -160   
304    -1104  
-448   -1536  
-64    -960   
0      -48    
-48    80     
48     112    
-32    -32    
-240   1120   
656    352    
0      160    
-880   -928   
32     80     
192    -624   
-448   -48    
32     -272   
96     496    
-400   -112   
-80    -320   
208    336    
16     656    
0      -48    
160    -736   
-320   -160   
-80    -240   
-256   192    
128    -96    
-224   -464   
16     -288   
240    544    
-752   80     
96     192    
-112   48     
336    160    
-832   -160   
288    1584   
624    -240   
-960   -80    
-192   336    
912    1232   
256    496    
-256   240    
16     848    
-176   -624   
256    -800   
-144   320    
64     192    
-272   -48    
128    80     
256    -128   
-240   304    
-400   -32    
-48    -256   
448    32     
-96    112    
-256   -112   
96     256    
-224   -112   
-544   -1168  
192    -144   
-400   -64    
-48    176    
-80    80     
304    144    
-112   384    
-192   304    
320    160    
-176   96     
32     -16    
-160   -32    
128    80     
288    352    
-224   176    
-16    224    
0      496    
336    480    
-112   272    
-464   -480   
-64    -192   
80     96     
320    112    
-240   656    
352    256    
0      288    
-256   -80    
176    48     
560    848    
-1072  896    
-144   128    
672    -48    
-144   -1008  
-592   -304   
-112   544    
608    272    
208    176    
-144   288    
176    416    
-160   144    
-144   176    
352    48     
-80    80     
-480   256    
432    -208   
-112   -240   
32     368    
-352   224    
352    -112   
-352   -48    
256    128    
96     -64    
-208   224    
208    -48    
-144   -96    
128    160    
64     80     
1280   3040   
-2976  -48    
-304   96     
1648   -448   
-752   -112   
192    -240   
-240   240    
384    -112   
192    -672   
-288   544    
64     -112   
-336   336    
480    192    
-48    352    
-176   -144   
176    496    
-416   -144   
64     160    
304    80     
-224   -48    
-320   -752   
432    -2080  
-640   592    
944    144    
-176   96     
-448   48     
368    -272   
-48    512    
416    -208   
-608   224    
160    16     
-128   64     
96     32     
240    -80    
-80    -160   
-352   -16    
-16    -272   
160    64     
-368   304    
576    0      
-256   144    
-224   -32    
48     112    
16     -32    
304    128    
96     16     
-16    272    
224    32     
-352   112    
-64    -480   
576    -368   
-512   -1200  
592    -176   
-512   160    
-848   336    
1328   176    
-272   -192   
48     -240   
240    -176   
-416   160    
240    208    
-128   -80    
144    48     
-256   112    
576    240    
-240   128    
128    -336   
16     160    
208    -784   
-64    80     
-112   208    
272    736    
880    -368   
-656   80     
992    -928   
-1088  -288   
464    -48    
480    128    
-256   -112   
-288   0      
464    48     
144    -224   
-208   96     
0      -400   
-80    96     
528    -1072  
-128   96     
-144   -32    
0      0      
-16    208    
176    96     
160    352    
128    -176   
-528   464    
1200   -224   
-416   208    
-144   -400   
-368   -336   
176    304    
96     -128   
-272   -672   
512    176    
-64    -976   
-192   224    
256    496    
320    144    
240    -112   
176    704    
-576   48     
16     64     
624    48     
-64    -64    
-144   128    
16     32     
160    80     
240    -464   
-112   16     
-240   -544   
128    176    
-32    -704   
-160   3472   
816    272    
-1456  -256   
32     -464   
784    -224   
-48    208    
-224   -64    
-576   496    
464    -304   
48     144    
-112   -256   
144    128    
-368   32     
176    288    
352    128    
-304   400    
-160   -48    
352    -64    
576    560    
-688   1408   
128    1664   
272    80     
-240   -224   
464    48     
304    416    
-896   416    
592    48     
144    -272   
-304   -16    
-192   64     
336    112    
528    16     
-880   -320   
240    -176   
368    -480   
96     384    
-368   -80    
192    128    
-80    -96    
208    96     
96     -368   
-240   -1360  
48     32     
352    -1424  
-720   -144   
304    -448   
64     -336   
192    -224   
128    -112   
-432   -656   
-304   -1008  
256    -1264  
-304   -96    
640    288    
-208   320    
240    224    
432    112    
16     704    
-160   240    
0      -224   
384    -1264  
-32    128    
-64    32     
16     112    
16     464    
144    -304   
-32    -208   
224    208    
288    -240   
-160   480    
16     -112   
400    0      
-80    96     
-128   -128   
96     -96    
128    -128   
-320   -544   
272    -912   
336    16     
176    -32    
-448   -448   
432    -960   
-672   -704   
464    224    
-560   -1568  
176    256    
112    0      
-80    144    
160    -160   
16     112    
-64    -96    
384    80     
-368   -48    
-144   -64    
384    -144   
0      -160   
160    -80    
-160   128    
80     -240   
112    -176   
80     64     
-432   656    
1040   -592   
-944   -64    
240    -432   
320    384    
336    64     
-288   -304   
-528   -688   
-288   -176   
176    208    
48     48     
80     -432   
-320   272    
80     -176   
160    -96    
16     240    
-32    240    
160    112    
32     -112   
-304   -320   
240    -432   
-48    -64    
-32    -48    
464    336    
-336   400    
-1792  192    
224    -512   
-368   -208   
480    -912   
-288   -576   
2288   -1968  
-2096  1680   
752    368    
224    320    
-800   256    
176    352    
64     -176   
240    992    
-272   1328   
-208   -416   
144    -272   
352    -64    
-80    128    
-96    416    
0      64     
32     -368   
144    192    
48     -368   
-160   32     
-32    -32    
192    848    
2096   0      
-1664  288    
400    -672   
512    -1600  
-496   -1232  
-432   -848   
800    -592   
-400   -1216  
-64    -368   
512    -560   
-224   -64    
-336   272    
448    144    
-256   -32    
-16    96     
-32    -320   
-320   -224   
144    64     
-144   -48    
-48    -64    
368    -400   
144    -48    
48     -784   
-1264  384    
256    16     
-608   752    
320    -464   
-384   400    
-400   -96    
-112   128    
240    -512   
-192   160    
-32    112    
-304   336    
496    1424   
208    160    
-560   208    
160    -400   
-176   272    
576    80     
-16    288    
-384   -96    
-448   -64    
368    -144   
-800   -80    
-256   0      
-368   -448   
768    -848   
1136   3088   
-1296  1920   
736    -1056  
1184   -144   
-1120  96     
-112   1104   
528    432    
-320   -208   
-48    368    
128    64     
-368   784    
32     -160   
256    -48    
-480   -96    
-240   320    
-304   -240   
208    272    
-64    -208   
192    1136   
-16    1728   
-112   912    
352    -16    
-240   -400   
32     272    
448    336    
-368   -32    
128    -368   
-192   -336   
176    64     
-112   -80    
-16    -64    
496    128    
-224   272    
272    -16    
-208   -192   
-128   -208   
432    -32    
-16    0      
-16    112    
48     160    
80     48     
-352   -128   
288    32     
-192   -80    
-320   -16    
16     48     
288    32     
-80    -112   
-288   16     
112    272    
448    176    
-224   96     
-288   16     
640    -32    
48     -32    
-224   -48    
384    -288   
-128   272    
-144   688    
-256   304    
-704   -224   
-16    128    
0      -240   
-272   -128   
80     32     
144    128    
-48    -496   
-272   -144   
64     448    
-32    -32    
208    32     
-144   160    
16     176    
-240   16     
64     -64    
-16    0      
128    384    
-288   144    
80     64     
48     48     
-32    32     
-576   1120   
2704   -512   
-1536  192    
224    1296   
1280   -16    
-720   160    
48     -112   
-304   368    
-32    128    
16     -48    
16     192    
32     -64    
-176   -48    
96     480    
416    -400   
-576   96     
336    240    
-32    64     
-48    32     
-16    16     
-256   -1312  
-432   576    
928    400    
-1104  96     
48     64     
688    -16    
-544   -16    
-224   -96    
128    96     
320    -128   
-384   176    
144    -32    
48     112    
-32    0      
336    -16    
-384   -272   
80     -64    
-16    -144   
80     352    
-176   -96    
128    -272   
144    -80    
-160   64     
272    64     
-624   -80    
576    224    
-128   32     
-80    48     
128    32     
272    -1408  
-1920  -1552  
528    -416   
-416   80     
608    432    
-816   -416   
208    -208   
-272   -128   
-144   96     
496    -16    
16     -48    
-352   -64    
-16    112    
160    208    
-192   160    
48     288    
-176   -96    
80     144    
-224   128    
-80    192    
-128   64     
672    1152   
-560   -320   
-864   -80    
864    -192   
-320   -32    
128    288    
0      48     
-144   512    
1072   -192   
-368   160    
-320   -32    
16     112    
64     112    
64     -32    
192    160    
-368   128    
160    16     
-96    304    
-432   352    
224    0      
0      16     
0      80     
528    224    
-896   0      
128    96     
128    -160   
512    -48    
-592   256    
144    -1952  
-32    112    
-288   96     
48     64     
304    32     
-160   -32    
-336   144    
112    336    
576    320    
-624   192    
208    224    
256    16     
-272   48     
176    144    
-208   -128   
160    -1488  
64     352    
64     320    
160    48     
128    144    
-592   -624   
-384   -2048  
1952   -1872  
-704   -48    
-912   336    
-128   240    
160    320    
240    -224   
176    304    
-352   -416   
-176   -128   
208    -96    
368    272    
-224   0      
-272   144    
352    -208   
416    192    
-64    32     
-144   32     
-112   32     
480    -400   
-224   -528   
-144   -320   
160    192    
-336   208    
0      224    
208    160    
-144   -944   
-96    96     
432    640    
320    192    
-464   -496   
-80    224    
304    912    
368    464    
-32    -176   
-208   64     
352    160    
-640   208    
512    1024   
16     -128   
-240   -80    
128    -1488  
48     48     
16     -192   
-496   -240   
352    624    
288    1184   
-192   576    
656    -896   
-688   -384   
80     576    
-240   -240   
720    -496   
-736   80     
496    -848   
-432   -944   
-320   -832   
256    320    
-112   -256   
-80    160    
320    -464   
-16    304    
-64    -112   
224    -288   
-240   288    
48     -80    
-208   -432   
-160   -208   
-192   368    
448    -96    
-128   144    
112    -176   
-64    128    
-16    -544   
16     16     
64     -2496  
-176   112    
208    64     
-208   176    
288    80     
-208   176    
-368   -208   
1056   -624   
-240   576    
560    -480   
-544   448    
256    -864   
336    -288   
-48    -112   
-288   368    
160    144    
-112   48     
160    144    
240    112    
-16    176    
-144   -912   
464    -192   
304    0      
-272   272    
16     112    
-48    112    
720    -400   
-1536  80     
784    -192   
80     192    
-48    16     
48     32     
-80    -64    
208    48     
304    128    
480    -128   
-208   144    
-496   0      
528    -96    
192    -320   
-368   160    
-64    -32    
304    224    
176    224    
208    64     
96     -832   
-144   -1584  
272    -144   
-112   -1904  
112    -480   
-112   -224   
160    -1184  
-16    -16    
352    -1104  
-512   480    
16     496    
-432   1984   
2752   32     
-720   -128   
-192   384    
384    480    
672    0      
720    832    
-688   592    
-672   -1824  
544    -1200  
208    -688   
-144   624    
32     -832   
-432   -352   
400    -1840  
288    48     
-256   -176   
-304   -592   
336    -832   
208    -64    
336    704    
-1888  208    
288    496    
368    608    
-2016  32     
128    -1328  
-144   -1392  
384    -704   
-624   -432   
496    -432   
32     -240   
-288   -48    
-160   -80    
336    -128   
-16    -32    
-416   80     
320    96     
-32    224    
320    160    
-176   -64    
-112   64     
-32    -128   
-384   -176   
-304   -16    
352    544    
496    -304   
32     -976   
-240   272    
112    -208   
400    752    
560    -352   
-368   -144   
48     -16    
64     -160   
496    480    
-416   64     
-336   928    
720    80     
0      -304   
208    128    
32     176    
-496   -720   
48     304    
416    -272   
-256   560    
80     -48    
-416   -16    
432    0      
208    560    
-944   -2256  
784    -1696  
976    -912   
-1040  144    
-480   288    
-48    -112   
448    -480   
-192   -464   
-240   -32    
-368   -208   
96     80     
224    96     
-16    64     
-416   -48    
-288   -96    
288    32     
256    48     
-240   -80    
-128   48     
-864   -384   
-144   -400   
448    64     
-368   -272   
512    128    
-672   -464   
224    176    
-384   -32    
400    -96    
-112   -16    
-64    80     
64     48     
-368   240    
208    -112   
192    16     
-80    80     
-320   -112   
112    208    
144    -704   
320    -128   
-48    -768   
96     -144   
-336   -32    
-192   0      
400    -160   
-128   112    
160    16     
-256   80     
-96    -16    
224    96     
-784   80     
112    0      
-368   208    
288    -848   
-800   -64    
848    576    
-944   432    
304    304    
400    -32    
-912   112    
448    -384   
-496   -80    
432    48     
-112   16     
-112   -96    
-304   -320   
-320   -96    
272    304    
-992   32     
272    -112   
-160   -256   
-432   96     
288    128    
-496   32     
-128   -16    
128    -96    
-256   208    
368    -64    
-160   80     
272    48     
-208   -64    
-192   -304   
1584   2928   
-2864  -704   
-224   224    
1312   -288   
-624   112    
320    0      
-1040  256    
432    -528   
-1376  48     
208    176    
-144   48     
-128   96     
64     -272   
-112   32     
-224   -544   
-176   192    
224    -416   
-160   -48    
16     -176   
112    -128   
-416   -256   
1136   752    
-608   0      
-384   112    
560    0      
-288   48     
192    16     
160    -160   
-224   208    
-112   144    
-208   80     
176    -32    
320    -16    
-288   224    
-480   -272   
336    96     
176    -64    
-320   128    
352    -48    
-544   0      
160    -208   
-160   80     
-16    -96    
80     144    
160    -304   
-288   64     
144    32     
-208   144    
112    64     
-128   -160   
-336   -960   
-880   -736   
1744   -112   
-1376  64     
192    320    
208    -416   
-512   256    
96     80     
176    224    
-240   -288   
208    160    
-96    16     
176    192    
-208   -288   
-32    80     
256    -112   
-240   208    
96     0      
-16    -64    
224    -64    
-144   64     
-448   -832   
192    -128   
288    0      
-1120  -480   
304    176    
96     208    
-144   -304   
-208   -16    
-288   384    
272    -96    
128    112    
-48    -32    
-32    112    
-32    240    
-464   48     
256    -160   
96     304    
208    -128   
-160   -16    
80     192    
528    816    
-800   -592   
-256   16     
400    496    
-352   -320   
-448   80     
256    96     
160    64     
32     32     
-304   -176   
-32    112    
-224   0      
112    -192   
32     -16    
416    448    
-288   160    
-672   48     
400    -80    
-784   144    
576    -176   
-32    208    
-128   -64    
160    64     
-48    112    
128    -176   
-736   320    
-96    96     
192    -128   
-80    368    
1360   2896   
-1664  2160   
768    -208   
1968   -352   
-1152  -128   
-656   288    
512    -1200  
-880   -1840  
-144   -448   
64     224    
448    368    
-304   -176   
-192   -320   
272    0      
-80    416    
32     80     
48     816    
-432   -64    
32     512    
608    736    
-272   512    
-32    208    
-80    -240   
-208   96     
-160   -432   
-208   -544   
-64    -640   
112    -240   
0      -224   
80     656    
112    512    
-112   -16    
336    -272   
48     160    
-176   112    
-352   -304   
272    -480   
-128   -416   
-96    224    
96     480    
-304   64     
336    208    
208    -352   
-96    160    
304    800    
16     1760   
272    512    
32     272    
112    752    
32     -64    
64     592    
512    -128   
-736   1168   
704    -32    
80     784    
-160   512    
-240   592    
240    880    
176    -432   
-352   -720   
112    192    
-112   368    
208    -400   
-80    32     
48     96     
-208   -128   
224    -96    
-48    -304   
-496   256    
288    208    
-528   32     
480    -2208  
-112   208    
48     32     
-128   48     
192    0      
-80    176    
368    -208   
-592   -352   
-112   336    
208    96     
496    688    
-912   624    
592    -288   
-96    368    
-96    -128   
96     -1472  
-304   432    
-240   96     
304    96     
-48    0      
-64    128    
-304   224    
192    96     
-128   -32    
32     112    
-208   112    
-80    -16    
-160   -512   
192    -176   
48     -176   
-672   224    
864    128    
-528   -144   
32     176    
0      240    
192    512    
144    -320   
-576   -896   
112    -96    
288    368    
80     -448   
176    256    
-192   -96    
-48    304    
-48    464    
112    -80    
400    -448   
-96    -32    
-288   480    
-16    -656   
688    -96    
-64    496    
-96    -32    
-256   112    
432    -400   
-128   -384   
-176   336    
-256   240    
384    32     
112    -272   
1520   -544   
-2208  608    
752    -432   
1616   1504   
-208   -352   
-1536  -80    
2208   608    
-352   288    
-240   0      
448    272    
-96    144    
96     96     
96     -96    
-400   -320   
208    -32    
160    -32    
96     -48    
-192   -448   
0      96     
144    -752   
-240   -1008  
-96    16     
1248   -160   
-1600  0      
768    480    
304    0      
-1008  368    
448    -112   
-240   -224   
160    32     
192    -272   
-64    64     
144    224    
-384   80     
-176   -224   
512    80     
16     288    
-656   128    
64     16     
240    -16    
48     -176   
448    544    
112    112    
48     -336   
288    432    
128    496    
-160   208    
272    272    
768    144    
-640   -592   
-176   -16    
176    192    
-48    160    
80     32     
256    272    
16     64     
192    -672   
-480   80     
336    -816   
176    -48    
-48    -304   
-192   144    
64     -208   
176    32     
576    752    
-1104  144    
-192   224    
928    96     
-336   352    
-16    -1872  
304    -2224  
944    736    
256    368    
-800   128    
-448   352    
752    -64    
384    288    
-176   -208   
-112   112    
-192   -176   
288    80     
288    0      
32     -2256  
-48    -96    
128    -2032  
256    -272   
-208   16     
96     -256   
-288   -128   
640    80     
-480   16     
176    240    
336    -192   
-192   272    
-640   -336   
448    -224   
-48    -336   
-496   -112   
320    -224   
-368   160    
240    -80    
-64    80     
80     -128   
-256   144    
768    32     
-336   0      
80     -656   
176    64     
-64    160    
-32    -464   
128    -672   
-96    -112   
288    0      
-336   288    
-352   48     
128    112    
-1216  -16    
-112   160    
-16    -80    
-48    -80    
176    -144   
240    32     
944    -144   
-944   -64    
480    -240   
160    -48    
-32    496    
-192   384    
240    528    
-256   -16    
144    -80    
112    144    
-512   -32    
16     224    
400    -256   
224    -144   
-912   -128   
224    -640   
528    -2352  
-416   256    
144    -32    
-272   -128   
64     0      
288    112    
32     -16    
-448   -64    
-80    -192   
288    560    
224    112    
-112   -352   
-848   -2400  
16     688    
1104   64     
-1072  256    
1216   -224   
-320   -208   
-96    592    
-736   -96    
448    112    
144    96     
-112   16     
-240   -128   
-96    160    
256    -288   
-320   752    
160    -80    
-320   -208   
688    176    
-80    -352   
-144   128    
640    832    
-1264  176    
496    80     
608    -80    
-304   -176   
-192   -144   
-208   32     
304    96     
0      432    
240    -64    
-416   0      
-208   -288   
192    64     
416    -128   
-96    -128   
-320   144    
352    208    
-112   208    
80     -176   
-176   -80    
-112   -96    
-256   -48    
96     0      
-144   -32    
128    -128   
-272   -112   
-16    -288   
0      32     
-112   -16    
-400   208    
1264   -416   
-144   48     
-544   -112   
272    -128   
-496   -544   
64     144    
528    80     
-576   -272   
-16    -336   
192    -224   
-816   96     
-176   224    
352    272    
208    -128   
-128   -80    
176    -432   
-96    48     
-288   -144   
16     -16    
144    16     
-416   -416   
976    112    
-1696  -96    
1200   -144   
944    -224   
-912   -128   
896    80     
-144   128    
48     -368   
-48    16     
-576   32     
-176   128    
144    192    
-656   64     
-176   -48    
-160   0      
-240   -128   
480    -240   
-80    160    
-576   -320   
-384   128    
-112   80     
-592   464    
416    -752   
-400   272    
400    -400   
384    -864   
-672   256    
352    352    
-96    -160   
-368   224    
112    240    
-144   320    
-144   -176   
-544   -208   
512    176    
-624   -752   
384    96     
-144   608    
-816   448    
192    32     
16     -32    
64     240    
-384   16     
-64    -224   
-176   -320   
304    -16    
-464   416    
-416   512    
192    -32    
736    -880   
-2784  -768   
944    1040   
384    -576   
-432   -1056  
-640   -128   
-144   1104   
320    1280   
48     -256   
-80    1136   
-352   -928   
32     96     
-224   -224   
224    32     
-192   -208   
-288   -416   
-16    -256   
-96    352    
192    -256   
-48    -64    
-32    64     
-176   176    
-16    160    
-80    -32    
-32    -64    
256    304    
32     800    
-528   96     
368    -464   
-160   848    
-16    704    
-224   -384   
96     96     
16     80     
-224   -32    
-32    -736   
80     -32    
-112   368    
-400   -640   
272    -64    
80     16     
-368   496    
-32    -160   
48     352    
256    496    
-240   -64    
-224   -176   
192    448    
112    496    
224    224    
-80    128    
-496   944    
1024   320    
-48    1312   
288    1552   
48     672    
128    352    
-448   176    
-192   -240   
32     -464   
192    32     
-96    16     
-48    176    
16     352    
-48    48     
368    384    
-144   -64    
-176   -1008  
672    128    
368    960    
-176   -208   
32     -64    
64     0      
-96    384    
-32    -112   
-112   -384   
-112   -416   
672    -1136  
560    -304   
-256   160    
-400   240    
304    944    
528    544    
-192   -480   
-624   -288   
192    -496   
-112   224    
64     -240   
128    -80    
-32    -560   
-240   48     
112    -48    
-16    -240   
96     -48    
64     -160   
0      112    
-256   -304   
208    -320   
144    -128   
-176   112    
-592   -768   
1008   -96    
-416   112    
496    -208   
64     2048   
32     144    
-48    -688   
128    192    
-32    48     
-96    336    
112    80     
224    -32    
208    320    
-208   -32    
-176   16     
0      -32    
368    32     
-192   -32    
80     -128   
224    544    
-224   624    
-112   128    
64     352    
128    32     
288    96     
-208   -48    
-160   64     
320    160    
-256   112    
-464   -144   
2224   1056   
-1696  848    
-1104  240    
1584   224    
-1040  -272   
144    -432   
-48    -480   
-176   288    
496    128    
-48    144    
80     -16    
-48    16     
48     112    
-64    -32    
208    208    
-240   0      
48     64     
176    96     
80     160    
-80    48     
-32    144    
-544   -544   
800    -80    
-208   -224   
-416   176    
608    112    
-112   96     
0      64     
-336   -432   
0      -128   
256    80     
192    96     
-128   160    
-64    -208   
-64    272    
544    -96    
-640   400    
480    512    
-336   640    
-192   176    
304    -32    
-128   -144   
608    48     
-592   128    
368    -112   
-48    -32    
160    -96    
-96    -16    
-992   -1760  
416    -256   
368    48     
32     -32    
-176   272    
48     224    
-128   96     
464    96     
32     -448   
-96    160    
112    560    
-208   224    
704    48     
176    256    
-560   208    
-64    -464   
304    -16    
-80    -512   
-48    128    
112    112    
-512   64     
800    1168   
240    -2192  
-2928  -832   
1280   208    
176    64     
-480   240    
-304   -192   
288    -272   
272    352    
-336   -512   
288    128    
208    64     
208    48     
-608   240    
160    -16    
-224   -96    
352    192    
-32    -112   
-320   112    
-400   -320   
992    864    
112    -224   
-656   32     
432    176    
-528   32     
112    96     
608    -528   
-160   272    
-16    480    
-96    192    
144    384    
224    -48    
-400   256    
464    -128   
-560   -80    
128    64     
16     192    
96     0      
96     -64    
-112   -368   
112    192    
-16    -464   
208    128    
-64    -528   
-16    -32    
-48    0      
128    208    
-288   16     
80     96     
272    -192   
-112   0      
80     144    
-208   -240   
576    208    
544    -224   
-128   336    
-576   320    
144    272    
96     -624   
-112   -208   
-16    -1408  
-352   16     
448    -16    
128    80     
-128   320    
-96    0      
16     96     
368    -224   
-464   240    
208    -704   
-448   80     
224    -64    
112    -48    
112    -880   
-160   -176   
-32    -16    
-96    -320   
144    -64    
336    544    
-336   336    
-32    -160   
48     32     
224    2256   
1888   -496   
-2192  176    
432    -896   
176    -192   
416    272    
-560   -464   
160    -544   
-192   -240   
448    -48    
64     288    
-32    -288   
-128   112    
112    -576   
272    -32    
96     304    
-144   432    
-128   -112   
0      -80    
128    -480   
720    1024   
-1328  480    
976    272    
-464   176    
160    -912   
288    -112   
-336   -528   
112    -128   
256    80     
48     -896   
-304   -512   
416    -800   
-64    -32    
272    192    
-176   -80    
-144   672    
272    272    
80     -1824  
-160   -736   
0      -1056  
-208   352    
-160   -32    
176    64     
-32    -256   
-32    -112   
144    272    
16     -320   
96     -128   
-112   -368   
-336   176    
416    576    
688    -736   
-352   -560   
720    400    
-832   -208   
-176   128    
176    96     
384    -704   
-848   -272   
-272   -560   
192    256    
64     -96    
-432   -400   
544    -480   
-96    -96    
-160   -128   
176    528    
16     800    
16     272    
192    144    
192    672    
-96    -656   
-2480  -448   
2592   -256   
-256   624    
-1312  -256   
-496   -1360  
800    -1840  
-96    -2032  
-576   -976   
128    -1840  
0      176    
80     160    
0      400    
-16    176    
80     192    
-288   -224   
384    -320   
-544   -208   
304    224    
-992   48     
128    368    
-240   -400   
224    -384   
64     -352   
-672   176    
848    176    
192    480    
0      -400   
0      -336   
-160   -432   
-224   -48    
144    -512   
-864   -176   
720    -688   
-64    80     
-448   -144   
144    -272   
-624   -592   
64     16     
96     -320   
-512   256    
288    -784   
368    304    
-144   -448   
-368   -416   
-112   -368   
-144   -144   
-176   80     
272    64     
48     -2576  
-1968  -1360  
880    336    
192    32     
-64    -448   
16     -720   
-160   960    
448    1264   
336    -1264  
-80    576    
64     416    
-464   -144   
128    160    
0      -368   
-208   128    
-64    480    
-96    112    
-800   -256   
272    -848   
16     -352   
-128   0      
32     208    
256    -80    
-96    -256   
-240   -240   
-80    48     
-224   -32    
208    -384   
320    144    
-304   64     
0      -112   
48     -80    
-48    -192   
80     -144   
32     576    
-208   -432   
-32    -752   
-80    -320   
-752   -1024  
144    -1264  
272    -192   
-240   192    
-112   -624   
-176   -400   
304    -464   
-272   96     
0      304    
16     -1136  
-368   -560   
-160   432    
-416   -224   
0      944    
1248   -560   
-816   16     
-368   -144   
480    160    
-304   -336   
-160   912    
-144   720    
-32    -1392  
-656   -1152  
0      64     
384    528    
-400   -352   
32     -288   
-128   176    
-192   480    
-112   112    
144    368    
48     -672   
-384   -176   
384    272    
-1184  256    
-96    320    
400    -160   
-288   -400   
96     80     
176    -48    
-864   -160   
-112   336    
64     -1104  
896    -1728  
-944   832    
688    -624   
-160   -64    
-240   -176   
48     -784   
80     16     
-144   -96    
-528   -176   
160    -64    
32     192    
48     288    
-16    192    
-224   576    
208    112    
-304   304    
0      96     
-96    -112   
144    48     
-16    112    
-560   -896   
736    -528   
-304   432    
-112   -528   
576    -80    
-496   224    
-80    -368   
-48    -384   
208    192    
-80    240    
-32    240    
176    16     
-272   -48    
272    112    
0      128    
-208   304    
-240   -192   
128    80     
64     -112   
-192   64     
-352   96     
-288   128    
0      112    
128    -80    
-480   80     
288    -96    
-224   192    
144    48     
112    144    
-992   -1200  
-480   -560   
1120   -320   
-832   16     
-656   -272   
768    96     
-544   -288   
-560   -176   
-64    -192   
224    -64    
-272   0      
32     176    
-160   -80    
272    64     
16     -16    
-112   128    
80     176    
-176   -48    
-208   128    
432    -32    
-160   208    
-688   -608   
-80    432    
736    -208   
-784   -64    
608    0      
-112   -432   
-144   16     
-96    -224   
-192   32     
320    64     
112    272    
-64    0      
-160   144    
32     -160   
16     128    
-64    -96    
144    32     
160    304    
-608   368    
32     112    
208    208    
-224   -256   
-288   -128   
1360   320    
-208   320    
-656   608    
560    176    
128    -128   
-400   -16    
-208   48     
144    144    
592    32     
-48    -160   
208    -48    
-208   256    
160    0      
-128   -144   
416    -560   
16     -64    
-32    -144   
112    80     
208    -208   
-144   208    
-240   48     
80     144    
608    -64    
-32    176    
208    48     
544    1568   
-1744  5008   
1824   800    
-704   432    
-304   -192   
16     128    
-128   -112   
864    -320   
-320   112    
-32    96     
-192   160    
160    256    
-80    -128   
272    96     
-336   16     
-128   112    
304    160    
-208   32     
48     0      
160    352    
-288   192    
16     512    
448    -48    
-576   -64    
48     160    
-176   -128   
-48    -16    
192    -96    
80     -112   
-96    -48    
64     -96    
-224   96     
336    -96    
-128   16     
208    -96    
-224   32     
48     -192   
192    -16    
96     32     
-64    400    
64     336    
96     48     
-240   48     
144    192    
128    96     
-144   48     
32     144    
256    32     
-16    -128   
-320   -192   
288    112    
-112   176    
48     -896   
-288   -128   
144    64     
-592   112    
784    384    
208    752    
-416   1392   
160    832    
96     0      
-16    0      
16     32     
-112   96     
96     -32    
144    0      
-64    144    
0      464    
144    -80    
160    352    
-64    64     
192    -1136  
-16    176    
48     -16    
176    32     
-16    -144   
-16    -352   
-416   -128   
432    512    
112    448    
0      48     
-528   -1280  
960    -1904  
-304   736    
1072   -208   
-624   192    
224    -544   
-160   -208   
176    448    
192    -384   
-256   -160   
96     288    
192    112    
-32    64     
-208   48     
208    288    
224    -208   
-32    0      
144    320    
-48    -624   
128    -368   
-384   -304   
720    -16    
-304   -272   
144    -16    
-144   656    
-304   -304   
128    -112   
48     96     
-144   32     
-16    64     
48     16     
320    432    
-144   240    
-208   -256   
144    112    
128    -160   
-208   416    
272    -112   
-112   -480   
-320   -320   
176    192    
400    144    
64     48     
-64    128    
-32    192    
16     192    
288    176    
-112   144    
-240   -192   
336    176    
1792   496    
-2464  560    
0      -112   
880    -368   
-1056  -1008  
112    32     
-304   -96    
0      544    
208    224    
128    -16    
16     560    
-176   -208   
96     160    
-16    -16    
-32    -480   
-16    -176   
-64    0      
128    -288   
112    -512   
-144   0      
112    176    
-96    880    
1888   -272   
-1056  784    
-496   848    
208    -928   
128    -976   
96     432    
512    1632   
-416   -400   
-384   -1488  
608    -32    
-80    592    
-160   544    
32     -912   
96     -144   
-48    -48    
96     32     
-496   0      
112    112    
32     -512   
-16    -672   
256    160    
-176   48     
-608   -720   
576    -384   
944    1760   
-1248  1376   
496    912    
-48    -144   
240    -80    
16     -144   
-512   400    
1104   -96    
32     96     
416    -2320  
-96    -32    
96     1696   
880    -208   
-608   -16    
96     -384   
144    752    
288    -656   
240    -848   
-304   224    
416    -1232  
-272   64     
64     -816   
48     -128   
-896   -112   
-608   -1696  
1456   -1696  
304    528    
-224   256    
-576   -2464  
-128   -1808  
96     -816   
432    592    
288    -320   
-256   464    
-256   -528   
176    -112   
368    -384   
144    608    
-112   -80    
-128   -352   
32     -240   
96     -416   
0      -336   
-80    -144   
160    448    
240    -1040  
-96    -176   
-336   0      
240    -976   
-656   -1056  
224    -352   
48     -560   
-288   -480   
-192   -496   
432    640    
-1136  768    
160    224    
-80    -288   
48     -368   
-336   -672   
384    -272   
64     -528   
-272   -640   
-80    -144   
208    -48    
-32    0      
224    -96    
0      64     
464    928    
-192   528    
-80    336    
432    736    
-176   576    
0      -112   
-144   -368   
672    560    
-464   480    
-160   -1568  
-16    -800   
32     -1488  
-32    -752   
112    -800   
64     -768   
-352   -512   
112    -256   
-32    16     
144    96     
-416   176    
-256   -112   
208    -48    
-48    -176   
112    -48    
-304   -672   
192    -336   
-112   0      
288    112    
-144   176    
-80    48     
16     64     
-160   32     
576    -448   
-16    -208   
-1120  1040   
496    576    
-416   320    
-80    2688   
1440   48     
-1216  -80    
-128   128    
400    -464   
224    352    
128    -160   
-272   304    
240    -176   
-144   -112   
288    -64    
-48    304    
-192   -128   
80     240    
320    144    
144    16     
-48    400    
192    -560   
-64    -128   
176    0      
160    -80    
16     -752   
-1120  416    
1472   224    
-48    -272   
-944   400    
352    -80    
32     528    
96     -176   
-336   -272   
176    -224   
16     96     
-80    -96    
192    96     
-16    112    
-16    128    
-496   -64    
128    -112   
-320   0      
240    -112   
-160   32     
240    -32    
-608   64     
192    -240   
-16    32     
192    -128   
-208   -64    
-96    -80    
272    0      
-160   -272   
-48    96     
-560   1120   
960    240    
-480   -304   
272    16     
-416   128    
384    32     
80     -240   
240    -336   
-32    144    
-432   96     
176    80     
-160   -320   
16     160    
336    64     
-1040  96     
416    16     
-464   0      
320    -16    
-1280  -96    
-80    16     
912    784    
560    0      
-880   624    
1904   32     
-1408  -112   
240    16     
448    -464   
-480   -272   
128    0      
-160   160    
-16    -16    
-96    64     
-160   -80    
-688   -32    
-96    128    
208    48     
-352   480    
96     -144   
-320   160    
272    -256   
-336   -192   
48     -32    
80     192    
-144   64     
240    736    
-432   320    
64     144    
-784   208    
64     128    
352    0      
-352   -240   
-16    -160   
176    80     
-64    -64    
-256   0      
432    -48    
-368   464    
448    -144   
-176   448    
-96    16     
-240   80     
144    -16    
-224   96     
192    256    
-336   272    
-416   -96    
336    32     
-272   -192   
-1152  -2464  
1104   -1200  
944    -1184  
-1456  752    
-48    208    
432    -32    
-192   -144   
224    -32    
32     144    
-112   -496   
-368   128    
672    -48    
-592   -48    
-16    176    
-624   -16    
480    16     
-352   16     
-112   80     
-80    32     
-336   -768   
-240   -848   
64     -48    
-144   208    
464    112    
560    16     
-752   48     
112    304    
-112   -336   
-144   -176   
256    -208   
-336   -112   
96     64     
64     -48    
112    288    
-128   32     
208    -16    
-272   64     
-64    128    
0      -96    
48     272    
128    272    
-368   112    
112    224    
240    464    
-512   432    
0      -160   
48     -1376  
96     -448   
-192   352    
64     80     
-128   336    
48     288    
224    896    
64     -288   
-304   -304   
-96    -480   
-176   -160   
16     -656   
176    128    
-896   -368   
-64    0      
0      -48    
-16    -80    
192    -64    
-240   -544   
-608   -368   
128    144    
352    -384   
64     -240   
-224   272    
-240   576    
160    -256   
96     -208   
192    -64    
-160   32     
-128   64     
-16    32     
112    208    
-48    -400   
-240   560    
208    -192   
-368   -64    
784    -176   
240    496    
-544   -464   
-48    -400   
48     288    
416    368    
-752   -272   
336    608    
-176   432    
-80    288    
288    16     
-48    -16    
-288   256    
176    -224   
176    208    
0      64     
-304   304    
0      -96    
-64    224    
-336   -160   
912    -528   
-144   576    
-48    -96    
-320   288    
-16    208    
144    -240   
128    -224   
96     -368   
32     144    
-224   112    
288    96     
80     240    
0      80     
352    16     
-448   -336   
160    -448   
592    304    
-384   32     
-240   320    
64     16     
432    32     
0      16     
-256   32     
-304   192    
448    96     
80     272    
32     -64    
0      0      
0      -16    
2000   1040   
-2064  1152   
-112   240    
80     16     
96     256    
-96    288    
0      240    
368    736    
-272   256    
320    -304   
176    -176   
-32    48     
-176   208    
96     48     
48     432    
32     -560   
-144   464    
-64    672    
336    928    
-272   -944   
320    352    
-656   720    
2064   -448   
-1024  560    
928    368    
-400   192    
-80    320    
-240   1296   
1088   2320   
96     1392   
-128   -160   
624    -752   
-96    -1824  
-240   -192   
256    144    
352    288    
-112   192    
-240   384    
352    224    
224    384    
-160   64     
208    96     
144    352    
-144   512    
144    -336   
-192   -1456  
320    -1264  
-64    -2288  
496    -944   
224    -208   
-48    96     
352    656    
48     336    
-448   -640   
128    -176   
-32    -352   
-592   304    
-464   -1120  
480    -272   
96     16     
-432   -176   
464    240    
-32    -784   
560    16     
-208   -400   
560    624    
-272   384    
-64    48     
96     624    
256    288    
880    1888   
-848   1456   
768    -480   
608    -320   
-672   224    
336    -80    
-272   1648   
1216   -128   
-192   32     
-1008  -400   
304    160    
464    -544   
304    -16    
-496   32     
-64    352    
96     64     
240    64     
-64    -144   
-544   -784   
32     -768   
240    -80    
240    240    
-48    368    
-640   -32    
544    -352   
-96    208    
96     224    
240    192    
-416   32     
144    288    
336    240    
32     624    
160    -48    
-560   -224   
-192   80     
352    16     
112    -256   
-128   -672   
128    112    
48     -272   
32     -32    
-16    -80    
208    -96    
16     -144   
-272   0      
272    -16    
224    992    
352    160    
-64    -496   
-32    -176   
160    0      
416    1056   
-528   384    
-160   48     
48     -256   
-32    48     
208    0      
-48    176    
-272   64     
304    128    
96     0      
-16    128    
-32    352    
464    112    
-16    208    
-128   -144   
144    256    
96     0      
-336   -272   
608    -288   
-128   176    
16     -560   
64     288    
80     32     
0      272    
224    -688   
-864   -48    
368    -160   
-32    -320   
96     -160   
144    16     
400    2064   
2672   -48    
-1552  448    
192    -128   
240    96     
-144   -304   
64     -416   
288    336    
-272   -544   
96     32     
80     112    
-112   -160   
-32    -176   
16     -272   
176    80     
272    -1264  
-272   -176   
160    -112   
0      -48    
48     144    
-304   -1296  
-64    352    
832    176    
-496   -48    
480    0      
-96    -128   
-192   320    
-80    -16    
144    -448   
64     -32    
448    -624   
-176   -32    
-224   -1584  
-32    304    
736    -1312  
-288   32     
96     -384   
-288   96     
320    -32    
-192   -96    
32     -16    
80     -96    
-464   -80    
224    -224   
-512   -144   
672    64     
-320   16     
112    -160   
48     0      
416    -992   
-672   -816   
-176   -368   
192    -80    
240    16     
-48    -176   
-336   144    
272    160    
64     -32    
192    -272   
96     48     
-240   -112   
48     112    
288    -368   
-256   96     
-144   -976   
368    96     
-224   -48    
32     96     
-96    -144   
-96    0      
576    768    
-400   -656   
-1808  32     
1408   112    
-2064  -48    
-240   -96    
512    0      
-16    -752   
-528   128    
320    -592   
400    32     
-304   16     
-128   128    
352    -64    
-304   16     
160    -32    
-192   -112   
96     -96    
-32    -240   
-176   -96    
64     0      
-1040  -144   
880    -336   
144    304    
-496   -464   
112    64     
224    -560   
592    688    
-240   16     
-16    -112   
-48    80     
-208   -112   
128    -48    
-144   -112   
-96    -176   
-304   224    
208    320    
-352   -128   
192    -32    
-176   -192   
288    0      
-160   0      
-144   96     
192    64     
304    -16    
-816   80     
-96    -128   
-208   -48    
576    512    
912    2496   
-2128  1344   
1072   -592   
1264   -752   
-848   272    
96     -320   
-384   16     
512    -16    
-16    96     
-464   -128   
592    64     
-416   48     
48     80     
208    32     
-352   128    
-240   -208   
304    -32    
-16    -48    
-16    96     
464    672    
-736   -128   
-896   -208   
-128   -144   
512    16     
-448   -288   
64     -128   
416    -240   
-240   64     
352    -80    
-624   -528   
80     -768   
-256   -528   
-128   -96    
-272   -32    
176    -464   
-240   -592   
-32    112    
512    400    
-640   -288   
-320   -80    
-432   -32    
96     -128   
-608   -80    
-176   16     
16     272    
-80    464    
-96    -192   
192    240    
224    752    
-352   0      
0      -800   
112    576    
-464   400    
80     128    
0      432    
-272   400    
320    -304   
-400   480    
-112   1376   
144    -592   
-272   16     
112    -160   
-64    256    
-16    -432   
-128   176    
208    576    
-224   -32    
192    -96    
272    -320   
-64    448    
-224   -96    
96     32     
-16    32     
16     64     
-400   432    
0      80     
64     -272   
-128   -112   
48     -48    
-64    208    
-128   80     
112    160    
32     -16    
-384   112    
512    48     
-320   -288   
-336   256    
112    -192   
48     256    
-48    -80    
-48    -64    
-112   -80    
-48    112    
-16    -96    
288    80     
-480   96     
176    96     
-416   48     
80     96     
-112   96     
128    -16    
-400   -272   
160    432    
-384   64     
-64    112    
384    304    
-432   -96    
-144   -32    
-96    80     
-16    -208   
208    112    
-320   128    
-192   272    
192    -80    
112    -48    
-448   272    
272    48     
112    16     
-272   400    
-48    480    
80     16     
-560   -384   
144    16     
96     16     
-208   160    
112    0      
16     320    
-48    16     
-304   -96    
208    80     
-80    320    
-256   1088   
2928   -1600  
-1680  -128   
64     -1104  
288    16     
-784   -224   
-848   -1264  
288    912    
32     224    
-160   -592   
240    480    
64     0      
-272   128    
304    -176   
64     32     
-176   128    
-48    -240   
128    -416   
304    112    
-144   608    
-176   -848   
-624   496    
1456   -272   
-1312  352    
624    832    
-80    784    
160    880    
-1168  1584   
512    1104   
224    848    
48     224    
128    -128   
-176   -400   
-336   -96    
-64    336    
224    -16    
336    768    
-896   816    
-32    -192   
240    768    
400    256    
-256   128    
-528   -16    
784    48     
-304   288    
-480   -896   
-448   -304   
304    -384   
-336   64     
480    288    
-416   64     
-96    64     
416    32     
112    -432   
224    0      
-16    112    
176    112    
416    64     
-560   -128   
288    -80    
192    288    
-432   0      
480    592    
-672   336    
304    32     
-544   -16    
-160   128    
176    16     
-416   -896   
-320   -1712  
1216   -720   
48     -144   
-560   32     
-864   128    
-80    -144   
1136   -128   
-592   320    
336    144    
-704   192    
784    112    
-224   48     
32     64     
96     240    
-496   96     
576    144    
-16    48     
0      64     
32     -48    
-336   1136   
624    1488   
-160   576    
-96    -176   
432    64     
-96    -32    
16     128    
144    80     
16     208    
160    -96    
16     208    
-48    144    
288    352    
0      352    
-400   -96    
416    32     
-480   -80    
416    0      
-544   -176   
208    16     
-304   192    
80     16     
80     32     
-16    96     
-112   256    
176    320    
-176   304    
528    -144   
-576   96     
160    16     
128    448    
256    240    
-224   208    
-288   -560   
288    -240   
-176   256    
272    -768   
-304   160    
400    -112   
-176   224    
-128   -128   
-160   160    
192    112    
16     96     
48     -224   
-64    48     
-16    -64    
-32    240    
-112   528    
512    224    
-64    -304   
-464   -304   
416    128    
-240   224    
64     144    
192    0      
-192   0      
176    -272   
32     592    
-160   128    
112    -144   
32     144    
1248   3152   
-2720  -192   
-208   -112   
1600   -144   
-784   -592   
-16    48     
256    112    
96     192    
-144   32     
336    -64    
-288   400    
-16    144    
96     32     
144    0      
-144   -160   
-32    352    
16     224    
32     -560   
32     256    
176    0      
-400   -208   
1184   -272   
-416   -16    
-448   -160   
560    160    
64     -224   
-272   304    
192    -32    
368    -64    
-400   288    
240    -272   
96     128    
240    -176   
-192   208    
80     -128   
-16    112    
240    -544   
32     64     
-48    -1168  
368    80     
-112   -48    
-48    144    
160    80     
144    64     
192    16     
16     16     
-256   272    
112    0      
160    112    
-48    -576   
-496   1376   
672    992    
-576   624    
-48    -352   
-48    64     
464    16     
-176   128    
320    144    
-176   464    
-256   176    
176    160    
96     64     
112    -864   
192    416    
-384   -32    
-64    336    
288    -208   
-272   48     
368    -416   
16     -16    
-48    48     
48     -304   
-1104  704    
1344   416    
-704   256    
-144   -368   
624    32     
-144   -112   
-432   -48    
-256   -32    
544    32     
-80    -48    
16     144    
-48    -112   
16     48     
-320   112    
368    -528   
-48    272    
-176   224    
304    -432   
0      -192   
80     -1312  
-272   -112   
1232   224    
-1104  144    
0      16     
432    -224   
-240   -1104  
0      288    
-32    -240   
-400   96     
432    -128   
96     -128   
-272   176    
-272   64     
80     112    
208    208    
-224   -272   
-144   -1472  
0      -112   
224    208    
240    -416   
480    -624   
-528   272    
240    -128   
32     32     
128    -384   
-352   96     
80     -64    
80     832    
1200   2208   
-1424  272    
432    96     
1104   -912   
-1232  -176   
224    -304   
16     -256   
560    -1408  
-32    128    
16     -368   
-128   112    
-16    -64    
160    128    
96     -304   
-64    -144   
-464   32     
32     -256   
144    -352   
32     224    
368    784    
0      0      
-208   -144   
224    -432   
-144   608    
-48    512    
-96    336    
640    608    
-32    848    
-112   1200   
-48    -704   
-288   -304   
112    -144   
-176   192    
128    -304   
-320   -416   
208    -656   
0      -48    
-320   -1904  
-48    736    
176    400    
-400   -608   
304    -128   
128    -80    
-432   -704   
336    304    
-208   800    
432    112    
-1104  208    
-160   -432   
144    -368   
16     -128   
16     -496   
448    -752   
-752   48     
416    -448   
-560   -1184  
288    288    
112    -288   
240    -96    
208    400    
-336   112    
-32    -32    
-272   -128   
-240   -672   
528    -736   
448    -160   
-304   240    
176    -496   
-144   208    
-336   272    
-32    112    
-192   -64    
176    -80    
-304   32     
272    -32    
-208   -80    
-288   -112   
-368   112    
160    -32    
-96    -144   
64     -96    
640    928    
-1136  336    
656    -192   
0      176    
48     32     
-96    0      
-304   144    
32     -384   
64     64     
-240   144    
-240   112    
-16    -48    
192    -208   
128    -80    
-288   -208   
144    208    
-96    -352   
208    -80    
288    -48    
-176   112    
368    -192   
-1392  -240   
720    -32    
80     208    
-112   0      
-208   16     
256    -336   
-16    -144   
160    160    
-768   -32    
16     96     
-48    -560   
-240   -272   
160    144    
-400   -64    
-48    -432   
-368   -128   
0      -496   
-144   -432   
128    48     
16     160    
160    -208   
-816   -208   
-96    -96    
48     160    
-112   320    
32     -176   
-64    80     
-624   256    
320    464    
-336   1840   
2560   -288   
-1168  352    
-608   448    
736    -1344  
464    -224   
-160   -736   
-576   -432   
-16    1024   
-176   1264   
640    1104   
16     384    
-464   -64    
-416   0      
480    -64    
192    192    
-416   -416   
-208   512    
272    96     
-128   192    
352    1376   
-896   -880   
-976   416    
1536   -880   
-1760  672    
1472   -384   
-1168  -1056  
448    672    
512    480    
-384   80     
-96    -16    
-32    160    
0      112    
32     -160   
-640   -224   
-96    224    
256    160    
-160   -144   
-32    128    
-192   -192   
160    -80    
160    496    
-656   -432   
-64    368    
608    96     
-720   -528   
560    80     
464    368    
96     48     
-208   -80    
64     112    
352    0      
-48    80     
128    80     
-304   -160   
-528   -176   
592    -176   
-128   880    
352    384    
128    16     
-48    80     
-144   -16    
16     192    
-272   112    
272    48     
-880   -48    
-176   128    
48     -80    
-112   -288   
112    -2080  
1312   -2320  
-304   -144   
352    -192   
-384   192    
-688   112    
672    -48    
48     272    
96     -224   
-672   -64    
192    -96    
-160   96     
-224   -32    
-400   224    
-32    -1488  
64     400    
-64    -80    
-192   144    
64     0      
-320   352    
704    384    
-768   448    
144    -368   
608    192    
256    -112   
-672   128    
320    576    
-48    192    
-256   16     
16     -112   
-176   80     
64     144    
160    16     
-352   32     
496    240    
-752   256    
528    32     
-752   -304   
480    448    
-224   0      
-336   320    
544    -96    
-608   96     
-176   32     
-64    208    
192    416    
80     -48    
-432   192    
336    16     
-48    16     
-336   -32    
160    32     
-304   272    
848    192    
-592   -192   
-400   -224   
688    16     
-16    64     
-256   288    
-48    128    
-240   256    
208    240    
16     176    
-64    144    
16     -128   
-112   -112   
256    400    
-160   768    
240    352    
128    -640   
-432   304    
384    0      
-32    224    
-240   112    
48     112    
240    160    
-128   -176   
-176   -32    
336    272    
16     480    
-64    -48    
-288   -2080  
-1152  2048   
1760   208    
-1056  160    
608    64     
368    560    
-1056  656    
-64    -432   
496    -592   
-160   560    
-48    -64    
-256   96     
-16    352    
304    -448   
-208   96     
96     192    
-688   80     
432    -144   
160    16     
-128   80     
272    1200   
-1024  -96    
304    352    
784    64     
-272   80     
-48    80     
64     400    
-240   320    
240    -96    
112    -160   
-144   192    
-128   96     
352    48     
-320   192    
192    192    
80     320    
-80    160    
480    496    
-640   368    
64     240    
48     176    
176    -32    
-144   192    
16     48     
0      272    
160    48     
-208   288    
112    16     
-64    48     
-480   -48    
48     624    
4592   656    
-1792  672    
-656   -208   
1456   128    
-368   16     
-112   752    
416    544    
-32    512    
-176   -144   
96     144    
32     -64    
48     256    
-240   -432   
176    -64    
336    32     
-240   -224   
32     -32    
-96    -80    
400    96     
-416   -272   
1104   608    
-400   192    
-304   128    
784    928    
-32    736    
144    -224   
96     352    
272    -16    
16     192    
-592   160    
-96    -544   
416    -64    
128    144    
192    208    
-32    176    
-112   -144   
496    176    
-256   160    
64     144    
16     64     
0      176    
0      -272   
-256   352    
-224   -272   
480    -160   
848    688    
224    -144   
-160   -32    
544    -16    
-352   224    
144    224    
-336   -464   
-96    -336   
432    -16    
-16    -64    
-256   -208   
304    144    
80     272    
-544   -1232  
160    176    
176    -320   
-112   -80    
288    -240   
-48    -112   
352    288    
208    320    
352    64     
-352   320    
-144   32     
-464   -2576  
-928   -688   
704    480    
-112   -304   
208    -544   
-240   -496   
-256   -128   
-352   -1408  
464    -1488  
-224   432    
-96    -64    
-80    -240   
288    208    
208    192    
-240   336    
112    304    
-176   320    
-96    0      
400    96     
-144   176    
48     128    
-80    -416   
528    256    
-208   -288   
160    384    
-32    -640   
-336   80     
80     16     
0      576    
336    304    
-352   128    
-176   32     
-176   -656   
32     -688   
96     -416   
48     864    
-320   -112   
400    352    
-128   -880   
-176   16     
-176   80     
-112   176    
112    -272   
-64    144    
304    512    
-208   80     
384    -32    
-592   -720   
176    128    
160    48     
-448   -560   
992    -48    
-704   752    
-112   -192   
-64    560    
-384   -288   
-208   -1808  
-272   448    
704    944    
240    544    
-176   -688   
-176   -672   
256    -528   
176    -2624  
80     -368   
-240   128    
-256   16     
288    144    
32     -16    
64     80     
176    -80    
-96    -336   
-80    112    
192    -288   
128    0      
-1008  -112   
144    -32    
-64    400    
-160   32     
240    -112   
-80    -656   
-352   704    
928    -160   
-688   -64    
192    -96    
224    -80    
160    192    
0      -80    
384    -592   
32     -304   
176    -144   
256    -432   
0      144    
-176   -96    
208    -48    
-112   -784   
96     -320   
224    -1600  
208    32     
-32    192    
224    768    
-176   64     
64     -112   
448    48     
-768   240    
16     -144   
-32    -480   
-864   -224   
400    320    
240    -400   
-560   -576   
160    80     
240    240    
304    -464   
128    -384   
-640   -352   
32     320    
368    -128   
368    400    
-368   -320   
-240   336    
96     -464   
-656   112    
272    -592   
-288   -176   
-64    -48    
128    48     
336    -304   
-240   -144   
304    -1600  
-1232  -1120  
576    224    
192    -224   
-752   256    
880    -80    
-336   272    
560    160    
-480   480    
64     240    
-464   192    
544    208    
-208   48     
-112   -544   
240    368    
416    -80    
-32    128    
-176   256    
112    208    
-224   16     
160    -128   
-128   112    
-432   -928   
-304   -240   
352    -560   
-32    -192   
-336   160    
464    -304   
-32    -720   
-752   256    
784    -368   
-144   -16    
32     112    
128    -240   
-320   -96    
224    224    
96     16     
-80    0      
-128   192    
-144   -208   
320    -96    
240    -48    
80     784    
-608   0      
128    144    
-16    80     
64     224    
-192   624    
-368   144    
-560   -896   
256    -240   
272    16     
-416   16     
64     144    
432    -160   
-64    -1040  
112    -720   
320    -64    
256    -192   
656    784    
112    224    
-704   80     
416    32     
656    304    
-528   80     
-96    -80    
-16    96     
928    -368   
-464   96     
-80    -16    
480    96     
-1616  -2672  
-1648  -1280  
224    -160   
64     -64    
-720   -112   
-240   0      
-80    -64    
-16    272    
304    128    
-720   -256   
-32    96     
368    64     
-368   112    
-160   176    
80     -160   
144    -96    
-112   64     
-496   -176   
336    320    
80     -336   
-480   256    
816    -32    
-848   208    
-480   -160   
-288   -80    
208    112    
-560   80     
0      64     
-32    48     
32     -128   
224    -112   
32     -32    
112    32     
-144   352    
-176   -208   
-352   -80    
512    -144   
-656   -288   
720    0      
80     -112   
-144   176    
128    64     
-336   64     
240    -320   
64     64     
-144   -208   
-560   -192   
240    -256   
352    16     
0      448    
-32    304    
-80    416    
304    -128   
-352   528    
512    64     
-672   48     
-224   -352   
192    -176   
192    448    
-112   160    
-64    -16    
176    112    
-160   0      
-176   -16    
0      0      
80     0      
192    16     
-528   128    
192    368    
-96    -48    
-96    -368   
96     -112   
64     464    
-560   144    
288    128    
176    -112   
-16    48     
-304   288    
48     272    
96     80     
0      48     
-1200  -224   
2464   -784   
-1408  -272   
-576   -176   
1184   336    
-304   224    
-320   -48    
-624   -1120  
512    -224   
-96    480    
-128   32     
208    96     
-176   64     
208    -112   
-272   528    
0      16     
-240   48     
176    80     
-144   304    
192    128    
304    -240   
-1040  1008   
496    -608   
-368   -400   
-240   -160   
112    272    
-64    912    
-144   448    
80     -80    
144    176    
-64    -80    
-112   256    
0      192    
288    -112   
-384   96     
-80    -32    
-32    192    
-64    0      
16     320    
-96    32     
-160   -128   
-64    -96    
16     16     
48     -64    
288    96     
-496   -144   
240    32     
-112   208    
-112   32     
-608   336    
1088   64     
1664   304    
-1760  32     
576    -240   
-32    -352   
-144   -304   
384    -80    
128    192    
-304   -32    
-256   256    
240    80     
368    128    
-256   -80    
-272   -80    
160    112    
128    64     
-160   80     
-96    -128   
208    96     
112    176    
304    1024   
-1664  176    
224    624    
64     352    
-240   -32    
80     352    
-48    272    
608    880    
160    32     
-160   -528   
-640   -112   
144    160    
160    -128   
-96    -80    
64     64     
112    160    
-224   240    
416    -256   
-32    80     
0      144    
-160   240    
0      320    
192    272    
-176   -32    
240    576    
-384   0      
-624   -1632  
-656   -1008  
368    -592   
-688   16     
192    96     
-144   -64    
112    -272   
240    448    
480    352    
-432   -208   
336    -672   
-304   -176   
128    -96    
192    128    
-80    -224   
-16    16     
-96    80     
96     128    
-128   -352   
528    -992   
32     0      
80     -160   
-32    -320   
-112   64     
1088   1264   
-2512  -176   
1088   992    
864    304    
-1136  -336   
176    -1088  
-64    -176   
560    176    
-80    -288   
-80    560    
-80    -176   
32     -176   
304    320    
128    240    
-80    -336   
-320   256    
128    112    
-80    96     
-176   192    
384    272    
-272   -1408  
272    480    
-320   -128   
-160   32     
736    784    
-48    608    
-320   32     
48     880    
0      -16    
112    80     
144    128    
-336   -224   
112    544    
224    48     
496    464    
-176   704    
-224   -160   
96     -160   
336    -32    
-96    400    
-128   -176   
-336   -80    
320    736    
0      -48    
144    -80    
-80    496    
16     -768   
352    -144   
-80    800    
-32    480    
-48    368    
128    624    
1072   672    
-576   -800   
240    608    
-80    320    
400    96     
-80    336    
176    576    
-144   256    
-112   -16    
192    -64    
224    208    
-384   -16    
48     -32    
48     -288   
-144   -80    
288    480    
-560   -112   
-192   576    
-16    -16    
16     112    
64     32     
48     400    
352    800    
-384   304    
400    416    
16     400    
-80    -256   
112    -512   
-240   -336   
1168   -256   
64     336    
-368   -848   
128    0      
-288   -464   
400    -176   
128    288    
336    1024   
-80    48     
-112   -448   
208    -272   
176    688    
0      -528   
-272   -208   
320    384    
-128   32     
176    128    
96     -160   
-192   144    
-224   -1424  
976    -336   
-496   -640   
144    -784   
-128   -240   
304    -480   
16     672    
160    -224   
-80    224    
-112   -864   
80     -288   
256    -256   
64     0      
-240   -752   
80     16     
112    -1040  
224    432    
-352   448    
128    96     
112    -48    
32     -32    
144    96     
240    208    
-128   384    
208    336    
-240   416    
-224   -208   
320    80     
-112   -128   
-160   64     
-96    -1616  
-928   -240   
1104   -32    
-1008  128    
208    256    
1056   -128   
-896   -96    
288    -544   
64     -816   
-64    -272   
96     -176   
16     -320   
16     128    
-144   -80    
608    304    
-304   -160   
128    112    
128    -48    
96     -64    
-240   -16    
128    -784   
400    1216   
-1120  -544   
-800   -16    
1408   -400   
-992   -144   
576    192    
-320   -144   
112    432    
752    80     
-400   -192   
368    -368   
-112   224    
0      -80    
-240   96     
320    -192   
80     -128   
-288   -352   
80     -352   
-208   32     
-224   -128   
480    496    
-544   -752   
-224   16     
256    -288   
-112   -752   
288    -528   
192    -80    
0      -512   
-528   176    
848    304    
0      -48    
-400   16     
336    -128   
-208   -608   
-112   -560   
-176   -544   
96     -752   
464    -336   
-80    -2112  
-720   48     
208    112    
384    -96    
128    -16    
-496   -112   
-464   224    
768    16     
16     -160   
-224   0      
1168   640    
-1888  -2928  
-1680  -1088  
1552   -432   
208    416    
-240   -224   
-80    80     
0      80     
16     304    
240    -400   
288    -224   
-48    272    
-96    -96    
16     64     
176    -160   
-736   -16    
128    -208   
-208   160    
208    -176   
-512   -368   
912    -512   
-400   -176   
96     -2496  
-112   -80    
-240   128    
672    32     
-848   -192   
640    -64    
-224   -512   
-128   -80    
-224   -48    
80     -64    
-640   0      
144    0      
-128   -272   
0      -336   
192    -96    
-176   -2128  
752    96     
-64    96     
176    96     
-96    48     
336    208    
-160   -16    
256    -160   
-288   384    
-32    304    
-112   208    
144    -144   
-336   16     
304    -208   
-368   -16    
608    416    
-848   400    
240    -576   
32     -656   
-560   -80    
384    16     
-320   -16    
272    0      
96     128    
-64    -272   
-256   -112   
16     -80    
128    -64    
-80    -48    
64     80     
80     -224   
16     256    
-144   672    
-144   608    
112    496    
48     -96    
192    -32    
0      48     
-336   -128   
-176   -96    
160    288    
-256   464    
272    192    
80     -208   
-688   -848   
1680   -448   
-1120  256    
192    80     
-64    -208   
-688   -208   
480    176    
416    544    
-32    544    
-624   688    
272    288    
288    560    
-864   80     
-224   64     
-304   -144   
96     144    
80     64     
-368   0      
-96    144    
-112   -64    
32     160    
-448   1568   
-192   560    
-336   -656   
128    -928   
448    -496   
-208   1216   
-288   80     
160    -400   
-48    80     
96     96     
64     64     
-208   -16    
-32    96     
80     -192   
-128   320    
-112   -240   
48     -256   
208    -96    
-192   -48    
-144   192    
224    -48    
80     -80    
96     256    
-160   -160   
96     160    
16     208    
-192   -208   
0      96     
416    -32    
1536   1088   
-2160  656    
-464   240    
1584   -432   
-1472  -720   
-288   -208   
-32    -1104  
-416   -512   
240    1184   
-32    688    
432    176    
-384   -96    
96     80     
48     -352   
-464   160    
448    -64    
32     160    
-256   544    
336    960    
-160   -112   
-592   -656   
912    1040   
768    -48    
-1072  -544   
80     -432   
160    496    
-192   1392   
592    2288   
112    1376   
-64    544    
-368   -464   
176    -544   
-16    16     
-288   96     
96     -32    
-336   -128   
-16    160    
160    -48    
-464   -96    
-160   -720   
48     -496   
192    -400   
96     544    
-688   -1280  
-176   -832   
144    -240   
32     128    
-304   -416   
176    1248   
96     1808   
-480   80     
752    -192   
-272   320    
-576   -48    
368    432    
736    448    
16     224    
-176   288    
-592   -64    
608    432    
-448   144    
160    464    
48     144    
-16    -544   
-96    464    
-64    -336   
-368   304    
-16    192    
-320   544    
-208   -32    
-240   -1408  
2128   -1024  
-128   -304   
-592   608    
-160   592    
112    784    
272    -368   
-384   -464   
-288   1040   
-112   432    
-352   -192   
464    32     
-48    -272   
-144   880    
-16    -272   
-48    400    
-16    528    
144    -32    
96     -128   
0      -80    
-176   160    
96     48     
144    32     
-464   368    
720    240    
-560   160    
416    -160   
272    224    
-112   1120   
32     496    
-32    -416   
112    -320   
384    176    
-336   -336   
-96    -208   
64     96     
-208   64     
176    624    
32     784    
-240   176    
-208   -256   
400    64     
16     80     
-96    32     
160    464    
272    1232   
-144   368    
352    -64    
-80    -576   
-96    -192   
-16    624    
432    -64    
-1120  -256   
224    208    
656    -240   
-784   -432   
192    640    
576    160    
-224   -1168  
-352   -752   
176    -304   
-96    208    
48     544    
160    368    
-256   240    
208    48     
96     0      
-176   368    
80     368    
240    96     
-64    0      
304    -32    
-192   32     
-144   -128   
96     0      
-128   128    
240    32     
-32    288    
144    112    
-32    -144   
-144   32     
464    2256   
1040   224    
-1040  1024   
928    16     
-528   -528   
80     -400   
112    -544   
208    352    
-496   544    
176    512    
352    112    
-112   272    
-16    -112   
-64    -448   
112    -128   
144    0      
320    496    
-320   240    
-48    -288   
192    176    
-112   -1168  
112    -144   
0      304    
-368   448    
624    352    
-176   640    
176    32     
-208   -48    
-112   64     
240    -128   
-64    96     
80     352    
80     -48    
-112   -256   
288    160    
-32    -80    
32     368    
-208   -160   
272    16     
32     0      
-48    112    
192    112    
-224   64     
384    48     
-176   -336   
-528   -176   
576    208    
-272   176    
80     96     
1344   2496   
1616   -1312  
-2976  432    
-48    -864   
1984   352    
-688   -160   
-1392  864    
1312   144    
-160   528    
-208   -320   
208    256    
-128   -160   
272    240    
-48    -80    
-272   -128   
192    96     
-64    -608   
-128   16     
160    -32    
400    256    
-112   0      
-64    -400   
1136   1072   
-832   128    
-864   -864   
560    176    
336    0      
-656   256    
368    80     
16     -96    
80     -64    
0      -96    
0      96     
96     -704   
-256   96     
816    224    
-320   192    
-32    368    
416    64     
-160   352    
160    80     
-144   192    
-240   -768   
-32    704    
448    -496   
-1136  128    
800    -1088  
-496   -400   
400    -624   
64     320    
-128   128    
-464   48     
128    -160   
480    -288   
-64    272    
-288   -144   
288    320    
32     -96    
-224   -512   
160    -144   
272    144    
-240   -80    
144    128    
256    -368   
-48    112    
336    -928   
-784   368    
0      80     
464    80     
80     112    
-768   288    
2656   -1680  
-1216  -272   
624    176    
912    160    
-1072  176    
-128   -96    
944    352    
96     -384   
-704   160    
-64    0      
48     256    
496    16     
-176   48     
-224   -112   
-208   -320   
448    144    
128    -128   
-128   208    
192    -496   
-896   48     
928    -480   
-560   176    
768    -96    
16     16     
-224   -48    
368    160    
-384   0      
480    -160   
-464   480    
304    256    
0      -752   
0      -80    
-80    -320   
16     -272   
160    -64    
-80    -32    
256    288    
-208   0      
16     -1072  
192    256    
-192   -800   
160    208    
-592   -656   
496    -368   
336    192    
-256   -752   
-64    -16    
224    -256   
272    160    
-272   -48    
96     0      
-128   -384   
240    -352   
-560   -1920  
-400   -1344  
352    -160   
192    480    
384    432    
80     368    
-1776  240    
240    496    
16     32     
32     -368   
16     208    
80     -64    
176    96     
176    144    
96     64     
-48    128    
-304   -96    
128    -784   
-176   416    
400    -384   
-720   -208   
-480   -112   
224    -176   
464    400    
-16    240    
-512   -352   
320    -784   
32     -592   
512    -3760  
-832   736    
832    288    
-336   -96    
-416   320    
448    -1520  
32     -512   
192    320    
-256   -624   
336    368    
-128   -16    
96     -96    
-160   -16    
-16    -592   
96     -144   
32     -1344  
176    192    
32     176    
-16    -336   
144    352    
208    -448   
-160   64     
608    864    
-368   -160   
-352   -368   
-688   -384   
352    720    
-288   256    
-208   -448   
336    528    
208    -480   
-192   704    
96     -2576  
-96    288    
240    48     
288    64     
-512   -384   
-208   -112   
-144   752    
416    -16    
-160   -224   
-176   -128   
-432   80     
480    -16    
-144   96     
208    -368   
-80    368    
-64    -432   
208    -144   
1552   608    
-2912  -16    
-624   -528   
2144   224    
-1152  128    
-432   288    
400    720    
-240   -448   
-208   144    
320    -192   
80     208    
-288   -576   
192    64     
160    -48    
-256   160    
-16    16     
240    -80    
-608   -16    
48     0      
112    -96    
-480   -448   
1152   464    
-560   208    
-304   -1136  
16     -912   
-448   112    
544    128    
80     640    
-32    112    
192    -848   
-256   -800   
64     544    
144    464    
288    -112   
-64    944    
640    624    
-400   128    
208    -16    
-304   400    
48     128    
368    368    
-80    -112   
80     992    
-688   256    
0      832    
-320   1056   
304    208    
-176   2112   
1248   1216   
-192   816    
-64    -304   
496    -112   
-48    -320   
176    -224   
-464   1088   
1104   -288   
-32    -32    
624    688    
-80    224    
-208   592    
512    352    
-400   -160   
160    -16    
-384   -64    
80     176    
144    -256   
-432   224    
-304   -608   
0      -192   
-112   -448   
112    432    
448    -848   
-80    48     
1072   736    
-1296  560    
-304   16     
704    -208   
-272   -1152  
-288   -688   
-64    1104   
176    64     
272    -304   
-64    -192   
-592   -416   
-80    256    
272    -112   
-48    -64    
-288   -224   
-352   96     
336    784    
176    1168   
64     288    
-288   -176   
-608   80     
176    -144   
160    -240   
-128   736    
144    736    
-304   208    
176    96     
208    0      
-80    -352   
128    -64    
224    288    
64     272    
-32    -256   
-128   -272   
192    144    
-288   -32    
-96    -288   
-64    -432   
-224   -80    
-144   -32    
64     368    
192    144    
80     928    
416    400    
-128   368    
224    976    
48     496    
-32    352    
768    1408   
-848   112    
-544   -128   
1024   -304   
-384   -192   
224    544    
-288   464    
48     624    
160    -240   
-208   176    
112    48     
-192   0      
176    288    
192    320    
-128   16     
-32    -112   
288    128    
160    608    
208    464    
112    0      
-560   384    
64     240    
352    352    
-432   -288   
-176   -128   
384    -192   
-176   112    
-32    256    
-48    128    
-416   -384   
1552   2064   
-208   368    
-864   16     
240    64     
-400   -160   
272    48     
-144   -144   
336    400    
-1088  -320   
128    32     
512    0      
-176   32     
-96    96     
-128   240    
320    -224   
-144   -96    
-240   272    
384    368    
-400   352    
-64    -64    
32     -1328  
-272   176    
656    128    
-848   160    
416    192    
-64    -224   
64     -32    
-64    96     
-48    16     
128    160    
160    0      
-64    32     
-368   96     
160    80     
48     48     
-144   32     
208    96     
112    -48    
112    128    
64     -128   
-176   80     
272    32     
-80    96     
176    64     
-672   -48    
640    288    
-288   32     
-112   -80    
160    48     
624    592    
-464   624    
-16    -400   
112    -528   
368    32     
-16    -224   
-640   80     
656    96     
-192   64     
112    48     
176    0      
128    16     
-272   32     
96     48     
256    176    
-448   -32    
272    112    
96     96     
-416   144    
-80    208    
176    96     
80     -208   
864    240    
-1856  80     
704    128    
864    -272   
-1840  368    
1024   368    
-656   64     
-176   -224   
288    -96    
-112   176    
80     0      
32     192    
80     176    
32     16     
-352   144    
208    -64    
-80    112    
-128   304    
128    48     
-48    0      
-512   -288   
880    -16    
-224   -32    
-624   304    
880    240    
-112   -32    
-192   -656   
272    272    
192    48     
-352   128    
48     -208   
-128   48     
240    -160   
784    -16    
-512   0      
160    288    
-32    32     
-336   -112   
352    96     
48     -112   
-160   48     
96     96     
-96    32     
-48    -96    
400    352    
272    192    
-160   112    
80     256    
2304   5888   
-1024  3456   
-624   -784   
1712   -928   
-624   208    
-192   304    
-64    -144   
624    -80    
-64    -400   
-16    288    
560    64     
-560   16     
304    192    
112    -144   
-256   112    
-16    160    
80     -16    
48     144    
-48    16     
592    1472   
272    848    
-528   -448   
208    -304   
-128   -1248  
-416   320    
912    208    
-512   400    
48     -144   
144    64     
-64    -240   
272    -16    
-240   144    
-112   -96    
-64    32     
-32    -144   
0      416    
256    384    
320    -400   
-352   -592   
112    80     
48     128    
192    96     
192    544    
-192   304    
16     -288   
-80    -240   
-160   -304   
336    -272   
-240   224    
560    784    
-48    352    
288    608    
-432   304    
-128   -1408  
-48    -176   
-64    -1008  
160    -288   
256    -1808  
-336   -1296  
-96    -864   
-32    -624   
-112   -224   
112    208    
-16    480    
-64    -144   
0      -176   
128    -288   
176    464    
-16    -224   
-160   144    
80     -208   
80     608    
80     -144   
-240   -144   
208    -464   
-144   -16    
-128   -208   
160    -48    
80     336    
-48    -176   
-272   112    
304    160    
-272   400    
448    -208   
336    112    
192    -496   
-48    272    
32     -512   
48     -272   
-160   -96    
-80    192    
-16    320    
-32    -208   
48     112    
-16    -336   
112    0      
32     -16    
-64    368    
288    -288   
192    304    
-192   -384   
-64    -464   
-848   352    
784    368    
-496   208    
480    -128   
-160   304    
-112   -176   
-16    -64    
352    -32    
128    144    
-112   -32    
-320   192    
96     -272   
192    64     
16     48     
128    -32    
-48    -80    
-352   -832   
96     240    
320    -880   
-336   -272   
-160   -112   
48     -224   
176    -80    
-48    -1776  
80     160    
-128   48     
96     -144   
-16    160    
-528   -608   
1680   -704   
672    848    
-944   -1152  
912    -576   
224    16     
-176   -896   
1344   -736   
-480   752    
208    -80    
-144   560    
320    -240   
336    -384   
208    208    
-288   -48    
80     -224   
176    -512   
144    -560   
160    -224   
-208   112    
-144   224    
-368   -704   
-1552  368    
1376   -16    
-816   304    
752    -400   
80     -1456  
-816   -2528  
128    -240   
336    896    
16     1280   
240    -96    
-288   -112   
176    -224   
-48    -112   
144    -32    
64     -400   
-112   80     
432    -176   
-176   48     
32     -544   
96     192    
-96    -448   
-16    -816   
-336   -3616  
640    1168   
-624   832    
416    688    
-1344  592    
432    464    
16     -224   
-272   -128   
224    -32    
-480   32     
-1200  -320   
832    -64    
96     -256   
-32    -1072  
-432   368    
-256   -1168  
720    -32    
192    -224   
-144   -112   
160    -272   
-128   144    
672    768    
-928   608    
-144   -48    
560    384    
-1120  192    
-672   -1424  
1152   -2032  
96     256    
-384   -240   
-432   -1952  
-208   -608   
656    -1200  
-256   720    
-352   272    
496    416    
-80    32     
0      160    
-176   -256   
-16    448    
96     -128   
16     192    
-272   16     
160    -32    
-352   -576   
576    -1248  
-224   -1248  
-128   -2208  
240    64     
80     96     
-432   64     
256    96     
176    -304   
64     -464   
-32    -112   
96     -128   
-176   16     
-32    -128   
-16    -96    
48     240    
128    -224   
-272   -16    
128    -192   
368    800    
-224   256    
272    256    
48     -64    
-48    96     
224    336    
-416   160    
-416   0      
496    48     
-368   -304   
-192   -368   
208    -160   
-16    -144   
192    0      
-160   -352   
496    -272   
48     224    
-448   -384   
144    128    
208    -16    
-352   -64    
288    32     
-128   -304   
-112   -208   
-160   192    
64     -176   
224    224    
-480   -16    
-192   -256   
400    -304   
-80    144    
-160   -320   
-32    16     
-256   208    
-16    -304   
-48    384    
16     224    
-48    -48    
0      -304   
-32    16     
-400   272    
272    64     
-256   -192   
-32    80     
800    -1056  
-2976  2128   
1600   -208   
-112   112    
-80    -128   
-96    -112   
-224   -16    
-112   48     
192    352    
352    -48    
-352   144    
-720   -32    
224    0      
176    -96    
-704   208    
128    -352   
80     256    
-240   128    
64     -32    
0      96     
208    1360   
-1408  -176   
-464   48     
1168   80     
-672   -224   
288    304    
-528   144    
208    -32    
-112   -80    
416    16     
-480   224    
-240   -304   
-272   128    
592    -272   
-224   -32    
-272   80     
32     128    
-16    256    
-48    -48    
-432   -128   
80     64     
-80    -80    
176    144    
-32    144    
48     0      
-576   128    
512    -64    
-80    160    
0      0      
-544   -1440  
2624   3968   
1568   -1216  
-2400  -528   
928    -96    
-272   -80    
-448   608    
352    128    
400    944    
256    0      
-640   176    
304    -80    
144    112    
-16    -64    
32     272    
352    48     
-480   144    
208    0      
-208   -80    
64     -16    
-128   176    
80     272    
-368   48     
1536   -496   
-592   896    
16     -512   
-480   352    
320    -96    
-480   64     
288    160    
-128   -160   
-256   48     
384    16     
-160   48     
-128   -48    
96     64     
128    96     
-48    -128   
-96    -304   
-256   -16    
16     128    
112    48     
224    432    
-352   -32    
-560   432    
896    16     
-512   -128   
112    48     
-272   16     
128    -64    
544    -160   
-352   208    
64     576    
-272   368    
64     -80    
224    464    
336    -160   
-272   48     
352    256    
-160   -16    
224    80     
96     48     
32     64     
-240   -16    
112    160    
-208   -48    
288    -64    
-496   224    
240    48     
16     -16    
-640   -384   
-656   2320   
800    1360   
-1168  -208   
128    -336   
1648   240    
-768   -1216  
-496   480    
720    -176   
-64    144    
-144   -48    
-256   368    
448    48     
-800   464    
544    -256   
16     96     
160    -224   
-304   272    
368    128    
-80    1136   
-64    672    
-32    -224   
48     -368   
-416   -224   
720    288    
-480   176    
-128   64     
560    256    
-592   64     
240    48     
-304   -832   
-96    80     
224    544    
-80    416    
96     -304   
-352   -128   
96     128    
-32    512    
-16    160    
144    224    
-144   32     
64     32     
432    -16    
-352   288    
208    592    
-432   -240   
320    -768   
-32    -352   
128    -640   
192    -560   
-256   304    
288    144    
160    -528   
-448   240    
640    528    
-832   -32    
736    288    
-192   -480   
112    -1744  
-304   -528   
-16    912    
48     -560   
-128   480    
144    48     
144    224    
-432   128    
128    48     
80     -48    
0      32     
208    -864   
16     128    
48     -16    
128    112    
96     32     
-80    96     
-32    48     
-144   0      
672    -288   
32     256    
-336   128    
80     176    
160    -80    
672    352    
-1376  272    
656    -432   
-32    192    
0      16     
256    32     
368    160    
-784   368    
336    128    
368    -32    
-64    16     
-192   160    
-96    -144   
96     160    
240    -16    
-112   -48    
-128   32     
-32    -480   
192    -96    
112    144    
-544   1120   
1040   -432   
-1168  -48    
544    -208   
-160   64     
32     -64    
480    -704   
-208   128    
112    64     
-320   -48    
272    192    
80     528    
0      -560   
-64    -192   
-96    64     
64     224    
416    160    
-272   -464   
-128   -48    
16     192    
112    -240   
-16    -32    
80     48     
-304   128    
64     -48    
320    48     
144    224    
-288   -160   
-64    -16    
-208   -1616  
2368   -1280  
-1312  464    
416    320    
-48    304    
-464   144    
672    -1248  
576    432    
-432   1712   
288    -576   
80     -160   
-32    -96    
352    80     
0      -224   
-496   176    
304    -16    
336    464    
64     448    
-144   512    
48     -496   
32     -176   
-800   -464   
1744   -352   
-512   -688   
-496   -16    
32     848    
32     208    
-272   208    
96     -704   
144    -384   
112    -544   
304    352    
-32    -176   
240    -16    
-464   -816   
592    480    
368    -208   
-304   352    
32     128    
-400   80     
320    0      
96     -272   
176    304    
-192   -1632  
1744   -1584  
48     -496   
-752   96     
688    256    
16     -336   
-272   128    
656    560    
0      16     
-208   -80    
-32    -304   
-112   -128   
448    752    
896    -368   
-528   -448   
544    80     
144    384    
64     -384   
-304   288    
512    -736   
16     240    
-192   144    
-96    -624   
-16    320    
368    144    
-576   0      
-304   -1424  
-176   -2448  
1872   -2368  
-864   304    
-48    368    
-288   176    
-192   16     
400    368    
224    224    
-640   352    
304    160    
48     -928   
96     128    
-160   -704   
-64    -1760  
176    -176   
368    -64    
-320   -144   
240    -176   
-384   -528   
656    880    
80     -320   
-320   240    
240    -32    
-576   -784   
240    64     
288    -160   
-240   48     
-48    -192   
64     -448   
32     -32    
-80    -320   
272    -304   
-432   -96    
336    48     
64     -80    
0      192    
48     208    
544    32     
-208   -624   
80     -80    
80     -176   
320    80     
-208   96     
0      -256   
-784   16     
128    -304   
288    128    
-320   -688   
176    0      
64     -240   
32     48     
-96    -384   
704    -160   
352    -368   
-560   -128   
48     112    
336    304    
-336   160    
144    -48    
-480   224    
224    -288   
-176   16     
256    -112   
48     48     
-192   -112   
256    -288   
-64    -2880  
-336   -144   
-48    -176   
464    -240   
-160   224    
16     -160   
-96    64     
-32    -160   
-32    256    
-96    416    
-992   -272   
-32    128    
-128   16     
128    -480   
32     0      
-832   -3280  
-256   128    
1088   -64    
-1184  -208   
576    144    
416    -384   
-464   432    
-112   -816   
-112   208    
480    16     
-704   -304   
-128   -16    
240    -48    
-16    -576   
112    128    
-32    -320   
80     -176   
96     -1824  
96     192    
-160   -192   
176    -640   
-576   576    
352    -48    
-432   -112   
480    -32    
-656   -624   
-400   16     
0      176    
-256   -64    
256    160    
-32    -720   
16     -64    
-160   -928   
176    -16    
176    80     
128    176    
-608   112    
-16    304    
336    -96    
-80    -112   
-96    -32    
-64    112    
-128   160    
96     -16    
-64    48     
464    -160   
-416   64     
224    -528   
-112   -32    
832    -464   
-32    80     
-1168  656    
1344   224    
288    176    
-1120  -144   
128    -64    
480    32     
-160   -432   
-80    -16    
240    48     
-288   -16    
-112   80     
176    96     
-48    48     
656    208    
-416   -48    
-32    -144   
-128   -400   
368    -352   
-224   -160   
96     480    
208    -640   
-1504  -176   
1088   -1168  
96     176    
-464   -128   
160    -80    
-112   224    
-64    -96    
-240   0      
-384   112    
-48    128    
272    16     
-32    224    
64     -176   
-656   96     
-304   0      
16     -96    
128    -368   
-272   128    
-192   -160   
96     144    
-672   48     
-512   -112   
576    656    
256    208    
-80    -128   
-832   112    
-192   16     
-16    -384   
-64    128    
752    384    
-288   -32    
-496   -496   
784    720    
-720   176    
-32    -176   
224    -176   
-240   112    
-128   144    
-144   -32    
64     16     
-128   -64    
-224   112    
336    336    
-352   0      
-304   0      
528    192    
16     -544   
-944   560    
1472   1392   
0      -400   
-944   128    
-336   352    
1104   528    
-336   1504   
-272   -592   
160    176    
-144   -112   
-144   992    
336    -16    
-416   -688   
0      224    
-240   -288   
416    -112   
192    -48    
160    32     
-80    0      
16     -384   
-192   288    
192    448    
-32    256    
-64    -480   
80     -672   
-112   -432   
-176   -64    
-816   -592   
-416   48     
272    592    
208    368    
0      224    
-320   -400   
-48    0      
-16    -176   
64     -560   
80     -48    
-128   -272   
-320   -1072  
112    -112   
-320   144    
176    -48    
-368   -192   
0      -64    
-304   -368   
144    224    
-80    -1664  
-336   -640   
288    400    
96     464    
-80    176    
-416   -96    
576    272    
-160   432    
-272   832    
400    544    
-128   384    
-80    -160   
352    -976   
112    -992   
-640   992    
128    384    
-96    48     
352    352    
-48    224    
-256   32     
-16    -48    
112    -352   
-288   -496   
-304   432    
352    16     
-48    176    
48     -32    
-64    32     
16     16     
176    352    
-480   432    
32     192    
496    -64    
-400   -64    
-112   160    
-96    -64    
256    448    
224    160    
32     -112   
-272   224    
48     144    
-112   -96    
304    304    
-96    384    
-224   -160   
352    -16    
-176   128    
-96    288    
304    144    
-176   144    
80     48     
48     160    
-64    144    
176    -64    
-64    -80    
688    96     
-1584  368    
720    -112   
240    32     
112    -144   
-288   144    
-112   -240   
448    448    
-144   336    
80     128    
-96    64     
-80    16     
-208   -144   
64     -128   
112    -128   
320    208    
-352   -272   
-96    -560   
208    304    
416    432    
-96    352    
-496   -112   
0      -192   
336    -160   
160    384    
-288   144    
32     48     
-112   -32    
-160   512    
320    96     
-464   2032   
1904   864    
-400   -192   
-368   -64    
512    -192   
-432   -752   
-240   -656   
800    208    
-336   96     
-272   336    
176    32     
32     208    
-80    288    
-96    288    
160    144    
48     64     
-240   192    
224    272    
-160   160    
208    0      
352    1504   
-1024  -368   
-576   288    
768    112    
-32    -320   
-144   128    
64     224    
-48    0      
32     112    
-304   272    
832    -2144  
-384   208    
-336   -48    
208    -160   
336    240    
48     32     
-352   -144   
48     208    
496    144    
-144   48     
-144   16     
-128   -192   
816    48     
-496   176    
160    32     
224    368    
480    176    
304    1040   
512    720    
-528   -64    
320    48     
-224   -240   
-64    144    
32     320    
-208   48     
288    384    
-416   240    
32     -352   
-32    160    
176    16     
32     -272   
-240   128    
-32    32     
-80    128    
320    144    
-400   96     
-144   96     
240    96     
160    144    
-608   1456   
1936   1984   
352    112    
-1344  -800   
-96    112    
480    -48    
-400   -704   
336    -64    
208    -80    
-512   176    
528    368    
352    -32    
-304   64     
-208   -32    
240    32     
160    144    
272    160    
-480   96     
-240   -112   
128    256    
912    160    
-1008  -160   
336    32     
496    -704   
-64    -32    
-16    128    
240    144    
-192   -224   
64     32     
496    176    
-352   64     
-304   208    
416    -48    
-160   0      
208    -144   
192    80     
-112   -80    
-288   -48    
176    -400   
-464   176    
192    -192   
-144   144    
304    96     
-192   -32    
-32    16     
384    16     
-80    224    
16     80     
0      112    
192    0      
-160   128    
-48    -32    
-48    -448   
-400   -544   
640    592    
416    -48    
-416   224    
16     -176   
384    32     
64     -240   
-288   96     
304    48     
-32    48     
-160   48     
208    -176   
80     192    
-176   -400   
144    -528   
-64    -256   
208    336    
32     -80    
-64    112    
112    176    
-32    208    
16     48     
48     -288   
176    1056   
-496   736    
192    -320   
272    -464   
-192   400    
752    -272   
-2624  1920   
1680   -352   
32     -16    
-400   -224   
336    -368   
-352   0      
400    80     
-448   352    
480    304    
-592   320    
144    -192   
176    128    
208    -352   
-608   336    
224    -256   
176    128    
-16    -192   
80     -176   
-112   -224   
-448   -480   
800    -768   
-736   -624   
496    -48    
-384   32     
-80    -816   
272    48     
464    -176   
-432   96     
-144   -112   
112    -336   
32     -144   
320    -176   
-208   -608   
-16    -32    
128    80     
-96    128    
-64    -544   
-128   -112   
144    -176   
16     -176   
-192   64     
256    -48    
-336   -16    
384    -464   
144    -128   
-400   368    
336    -32    
-32    -64    
144    224    
-816   1328   
1392   192    
-480   -96    
-240   -224   
432    -80    
-352   -48    
-1424  -192   
48     -544   
96     -128   
32     -656   
176    48     
16     -272   
-112   32     
400    160    
-176   288    
-96    64     
128    304    
-16    240    
48     16     
80     16     
-208   0      
-656   224    
2144   -320   
-480   864    
-320   560    
16     96     
592    -304   
-176   -96    
272    -1168  
-240   144    
160    16     
80     96     
-48    -80    
80     -96    
224    -80    
-16    -80    
32     48     
-32    -192   
-480   -240   
416    -176   
96     -80    
80     48     
0      304    
32     -880   
-400   -176   
320    -416   
32     304    
-736   -96    
176    -288   
400    832    
-800   384    
384    96     
-64    64     
-432   256    
-944   -208   
480    -432   
-16    368    
416    32     
-208   -384   
-256   208    
256    112    
352    -32    
-224   -48    
-160   160    
-112   0      
-208   480    
544    -288   
-512   -64    
-384   -976   
400    -592   
1280   2016   
-576   720    
-240   -608   
1248   208    
-1168  1104   
-64    112    
240    208    
32     -1712  
-64    -272   
-48    272    
192    272    
0      -128   
-240   -304   
-176   592    
-224   -320   
176    -624   
272    464    
-224   -240   
-16    -464   
64     -288   
80     -528   
80     368    
-304   -256   
-160   -592   
-192   -816   
80     -208   
-352   -144   
128    -176   
-304   -48    
160    -304   
240    -176   
48     -336   
160    224    
-32    -512   
-160   -32    
432    48     
-448   144    
144    -800   
288    576    
64     800    
0      416    
-128   -160   
288    128    
-16    48     
64     48     
64     288    
-256   112    
320    208    
64     304    
-160   -352   
16     144    
416    384    
-864   992    
-176   528    
352    880    
32     -400   
-320   -816   
160    -288   
-784   -976   
448    720    
336    400    
0      48     
-16    96     
-512   -560   
288    -256   
0      -112   
32     -240   
-624   -48    
80     144    
112    80     
-768   -32    
128    -32    
-64    32     
-224   144    
-128   -96    
288    48     
16     64     
80     400    
32     -224   
-64    0      
-16    -128   
624    16     
-1248  560    
544    -416   
-288   -368   
-320   208    
64     384    
352    208    
-880   192    
-176   240    
272    352    
-32    -192   
80     -32    
-48    32     
-384   320    
112    112    
144    176    
-336   368    
-304   128    
-80    192    
-160   128    
48     1024   
16     448    
-592   -192   
-160   272    
144    496    
-96    528    
48     688    
0      -480   
-240   -576   
64     464    
-16    -64    
-64    -288   
0      -848   
32     464    
-240   -128   
128    -80    
-96    -144   
-80    -96    
96     304    
224    -48    
-96    -240   
-160   160    
416    -32    
-240   -64    
256    -160   
-32    0      
-160   112    
112    112    
96     -208   
736    976    
-800   1840   
-288   -112   
880    -448   
-1888  -1024  
384    336    
608    -144   
-1040  -32    
384    -64    
-160   -16    
48     32     
-224   64     
224    96     
128    336    
-384   240    
-192   256    
160    -48    
-16    -112   
-176   0      
-192   128    
144    112    
448    1376   
-1376  -656   
-224   352    
432    96     
-448   -288   
-96    320    
160    -32    
-112   -16    
-80    128    
320    -48    
80     64     
-528   112    
128    128    
32     -48    
-160   64     
32     32     
-32    -16    
-272   608    
-80    192    
-112   -176   
304    -48    
64     864    
-480   -272   
-384   128    
608    336    
496    256    
-144   336    
-480   -80    
-672   320    
576    224    
-368   144    
-80    -112   
-224   -32    
432    -32    
400    112    
-336   -160   
-352   32     
320    176    
160    -48    
-112   -192   
256    336    
-512   -64    
-64    80     
592    64     
576    544    
-880   160    
80     -32    
-320   64     
-256   -208   
368    2880   
1632   -640   
-528   1264   
288    496    
-592   -160   
176    512    
-112   -32    
-288   -112   
96     -352   
224    416    
48     176    
-320   128    
144    64     
112    32     
368    192    
-352   192    
-176   64     
288    48     
-160   -48    
-464   -592   
-80    160    
-160   48     
64     208    
576    -128   
-528   -256   
256    320    
176    16     
-464   80     
752    0      
-224   128    
80     -32    
-320   64     
144    96     
-416   -112   
640    336    
-496   -80    
32     224    
-48    -224   
-208   48     
48     144    
0      192    
320    80     
-288   96     
-336   -144   
400    32     
32     -96    
-64    448    
112    336    
-368   384    
448    -64    
-304   -64    
16     80     
-448   -496   
304    -16    
160    0      
-288   64     
416    304    
-160   -144   
240    -160   
-64    -64    
-128   0      
-240   144    
160    160    
224    32     
-64    224    
96     -160   
-256   48     
192    -176   
-144   -272   
416    64     
-64    -64    
-176   160    
96     176    
-112   144    
-32    -16    
80     256    
192    192    
16     -32    
16     96     
128    960    
240    464    
16     -1408  
-768   1312   
1216   -224   
-624   592    
832    -64    
-336   -32    
-368   352    
272    -96    
176    592    
208    192    
-528   -144   
160    80     
-64    208    
352    208    
-544   160    
224    -272   
-144   400    
192    64     
48     48     
-16    -720   
-352   -496   
800    -608   
-832   192    
176    -864   
304    -352   
-192   208    
144    -16    
272    576    
416    304    
-448   48     
-160   64     
128    128    
160    32     
224    -64    
-96    -480   
0      -48    
-320   112    
224    192    
80     -80    
48     -32    
-16    -48    
-496   -16    
240    384    
240    176    
-32    16     
-16    -192   
-144   128    
224    64     
-48    -256   
0      -1344  
-1488  -1328  
816    -816   
848    -592   
-1568  -368   
896    208    
128    -64    
-192   1040   
176    352    
-432   -48    
480    320    
176    96     
16     144    
-160   -112   
-64    -112   
64     -512   
160    32     
-240   -608   
288    -336   
112    -432   
-112   32     
-304   -560   
1344   464    
-1600  -80    
544    528    
832    80     
-944   -624   
864    -32    
-336   -848   
144    288    
-16    -192   
-192   160    
304    0      
48     320    
-112   48     
80     -240   
-192   -208   
208    208    
192    64     
-352   -240   
-192   -160   
48     -176   
144    0      
48     -640   
944    -592   
-112   -1184  
-400   -608   
368    -144   
-656   -256   
64     -96    
432    656    
32     288    
-176   -592   
-112   -800   
48     -64    
-336   480    
496    -736   
352    -240   
-48    880    
160    288    
224    192    
224    48     
-224   -96    
-64    -864   
16     -176   
224    128    
-256   -32    
-240   -400   
560    -624   
-288   -80    
208    -768   
1072   2480   
-1392  -64    
976    32     
80     -560   
-64    -336   
160    480    
-16    1376   
64     304    
80     -624   
240    496    
-160   -128   
-608   -544   
336    -576   
240    544    
-336   -560   
-160   -64    
352    336    
448    0      
64     -1968  
48     656    
-368   -64    
224    -464   
112    -192   
272    416    
-480   -432   
-160   -368   
288    -176   
-16    816    
-1280  -1632  
-16    -352   
80     -192   
192    80     
-464   -416   
48     -752   
128    -496   
192    592    
208    -112   
224    -496   
-320   464    
160    112    
80     352    
48     240    
-128   -720   
-736   -64    
352    224    
-48    720    
544    -624   
-320   336    
448    560    
-32    320    
32     -2880  
-496   -208   
1040   -592   
-32    208    
-96    272    
368    176    
-336   48     
0      1280   
208    1920   
-128   80     
-1312  -944   
64     -80    
160    -272   
-240   -464   
80     -288   
384    -1664  
192    -272   
-64    -64    
-80    352    
-128   -560   
64     -272   
256    400    
-160   176    
-160   176    
-64    -128   
-272   160    
512    912    
32     960    
-16    -624   
-368   -112   
-192   -816   
736    -1632  
192    -192   
416    288    
288    816    
736    -864   
-352   -336   
176    -32    
-560   -384   
176    80     
160    -352   
160    -288   
-272   352    
-176   -128   
192    224    
192    -352   
176    -160   
-192   -752   
64     80     
32     80     
-160   368    
-176   -784   
480    368    
-336   752    
-336   -192   
288    -64    
-16    416    
224    432    
-144   -240   
128    -144   
32     -448   
32     128    
32     -224   
160    -192   
-208   304    
464    640    
-272   448    
-80    16     
-352   16     
240    -48    
-144   160    
-96    -48    
288    112    
-144   -192   
192    -48    
-368   -144   
400    -64    
-16    192    
-192   16     
-144   304    
-848   992    
1312   624    
-208   160    
-896   -272   
672    416    
928    -112   
-848   -432   
224    -368   
32     -96    
-480   -96    
368    16     
-80    -16    
-160   96     
-256   -352   
-64    16     
192    -144   
176    272    
128    304    
-256   96     
304    0      
-304   -80    
-576   -1024  
-96    0      
160    -192   
-448   48     
16     48     
-80    -48    
272    224    
-512   -224   
-48    128    
160    -32    
0      144    
80     -32    
-240   128    
-144   -128   
272    64     
-112   -208   
208    240    
-288   96     
512    16     
-304   0      
-384   -144   
1024   48     
-864   -64    
-1008  176    
656    -400   
16     224    
-224   96     
192    480    
-288   -384   
-672   -48    
-96    96     
304    96     
224    -336   
-80    -48    
-608   -240   
-96    -560   
464    -64    
80     64     
-640   -64    
-400   0      
960    -112   
-560   128    
-448   32     
-544   -80    
544    768    
640    -560   
-224   0      
16     -272   
720    800    
-2224  3824   
896    64     
-64    288    
-144   -128   
224    -128   
160    496    
-608   16     
-32    -224   
-80    -32    
112    -128   
-352   128    
128    -80    
-96    16     
-128   64     
80     32     
448    96     
-288   -112   
-64    96     
496    320    
-688   -16    
112    544    
672    -288   
-608   160    
848    128    
-768   -32    
304    368    
-304   -48    
-64    112    
-352   -16    
320    208    
-416   -16    
352    144    
-176   -208   
-256   -48    
160    64     
320    208    
-512   32     
192    144    
80     160    
-304   16     
240    112    
-480   -96    
224    144    
-96    64     
192    112    
-144   -48    
-80    -48    
-48    -96    
352    16     
48     -32    
-96    -64    
96     0      
-832   160    
752    176    
-768   352    
288    -64    
32     -128   
-304   144    
96     256    
-32    -80    
128    112    
-48    16     
16     -32    
144    128    
-32    432    
-240   -32    
128    0      
-16    -160   
-176   256    
352    176    
-112   336    
-96    -224   
16     -496   
112    -128   
112    48     
-336   464    
192    336    
0      192    
208    -48    
-48    96     
-640   -816   
1232   -512   
-1200  256    
192    672    
224    -528   
-992   -976   
560    464    
800    944    
-416   304    
-304   224    
240    160    
432    64     
-208   288    
-16    64     
-32    32     
288    432    
-112   1136   
-112   96     
-128   192    
-32    48     
128    80     
-128   752    
560    -80    
-736   1200   
320    -304   
-128   -432   
384    304    
-416   -432   
48     1376   
-192   -400   
-128   368    
224    -240   
-208   144    
-16    -144   
-48    256    
96     0      
-80    144    
96     -96    
-128   -352   
80     816    
16     128    
240    -64    
-272   -16    
-128   256    
128    -128   
64     -368   
288    624    
-80    224    
-112   -320   
-160   80     
-96    -176   
1840   -272   
-1920  960    
1360   880    
-80    560    
-1088  464    
160    -896   
1088   -800   
-432   1408   
96     208    
-160   -528   
32     80     
224    -112   
224    160    
-560   -144   
-48    0      
272    -32    
-48    96     
64     80     
16     256    
-144   -16    
-800   -80    
1760   -176   
-304   -1040  
-1456  -384   
1168   736    
272    928    
-560   1024   
64     800    
272    320    
-64    -640   
400    -96    
-48    -192   
16     32     
-144   368    
336    352    
160    -144   
-384   128    
624    736    
-128   1488   
-256   624    
480    352    
112    352    
-352   -16    
672    160    
-512   -1696  
-256   -1024  
992    640    
-128   -112   
-64    288    
288    672    
-240   752    
-16    -304   
-240   96     
480    96     
-576   -128   
304    272    
432    32     
-400   1568   
992    464    
-464   -416   
0      320    
144    288    
208    832    
336    80     
-176   -96    
-96    96     
32     -48    
112    -512   
16     160    
-160   144    
-32    2400   
1456   336    
-1488  -912   
-688   -480   
880    -176   
32     -848   
-288   -1232  
-400   512    
-64    16     
272    848    
160    -288   
-176   752    
16     128    
32     -448   
448    -352   
-96    32     
-32    176    
368    432    
192    640    
-224   -640   
16     -256   
176    80     
-160   -464   
-624   -160   
880    48     
-544   208    
544    1152   
-80    1168   
48     48     
-96    -992   
64     -96    
-32    80     
-80    96     
112    96     
-128   320    
128    32     
-352   -768   
-96    912    
176    560    
-112   816    
400    960    
16     624    
-176   -384   
272    -464   
-96    864    
448    272    
-720   -96    
240    384    
128    -272   
-16    -1216  
-96    -640   
208    -784   
-624   304    
-48    -1328  
2000   -1056  
-416   48     
-352   608    
336    80     
112    -160   
-80    -128   
-192   352    
48     208    
48     -288   
48     560    
336    288    
-96    256    
192    80     
208    96     
-96    -304   
32     1104   
544    704    
-144   272    
-48    416    
176    64     
288    -1088  
-256   -640   
288    -2928  
192    224    
-32    416    
-16    64     
608    2272   
-1488  -416   
64     -80    
720    -128   
-400   -1408  
-288   -1216  
-48    -816   
352    -1056  
-656   -224   
80     -144   
32     240    
-80    -32    
0      -80    
-48    -1200  
128    -304   
-48    464    
192    -432   
-208   -624   
32     -48    
112    64     
80     368    
-496   -544   
208    176    
688    32     
-784   -272   
256    288    
-16    -144   
0      -32    
0      -720   
32     -48    
192    -2256  
-480   96     
352    -368   
176    32     
80     48     
-368   80     
112    -176   
160    -416   
336    -32    
-368   -96    
-368   176    
-32    -80    
112    112    
128    -432   
-96    -48    
-16    -1072  
-16    256    
144    48     
-48    112    
432    -208   
-1792  -416   
2304   1072   
208    -208   
-1296  -48    
624    16     
-624   16     
176    -480   
-352   352    
128    -192   
-16    112    
80     0      
-176   0      
-112   -2704  
16     64     
400    80     
-112   64     
-112   16     
240    16     
-224   -160   
80     160    
-496   -96    
-688   -528   
-704   -256   
480    -400   
-688   -800   
-464   352    
880    432    
0      -992   
-144   0      
-160   16     
192    160    
304    64     
-48    -144   
-96    -80    
-240   -176   
-112   96     
496    -208   
-208   144    
64     -160   
-528   -384   
688    -304   
48     544    
-240   -688   
-368   240    
768    -48    
-624   -176   
416    -96    
928    112    
256    128    
496    -32    
-1328  240    
528    -80    
160    -272   
384    -96    
-400   272    
-240   288    
144    528    
640    -416   
224    -256   
-224   -272   
480    -224   
-160   96     
304    48     
-80    -64    
-80    32     
80     176    
-96    -32    
-48    -16    
-32    -96    
560    1376   
-2096  976    
576    1696   
720    16     
-1808  -352   
704    336    
704    176    
-992   -336   
592    0      
-80    -176   
192    -128   
-144   16     
192    0      
-32    32     
-368   32     
112    160    
-128   -96    
-208   80     
-320   -352   
496    96     
-544   304    
-432   512    
272    -48    
-208   -144   
128    128    
208    128    
-320   -32    
144    -16    
208    64     
-1408  -192   
-96    272    
-816   -320   
304    -16    
-128   -336   
-16    -384   
-288   -224   
-32    -304   
-16    -192   
-640   -208   
-32    -176   
0      -80    
48     80     
-80    128    
112    320    
96     144    
0      208    
-144   16     
-64    208    
384    144    
-480   -64    
32     432    
240    272    
80     448    
-800   288    
368    -624   
-688   -896   
240    -240   
-240   288    
-16    880    
32     224    
-16    480    
192    80     
640    976    
-784   528    
144    512    
544    512    
-112   160    
-96    80     
-128   208    
240    352    
-304   16     
-16    -192   
-48    -336   
160    64     
16     112    
-16    416    
-48    176    
240    416    
-176   -496   
64     0      
-64    -112   
80     208    
-464   896    
992    -640   
-960   576    
32     752    
32     -768   
-96    -160   
-112   -256   
-64    -96    
16     160    
96     -48    
80     -272   
-240   320    
-208   352    
208    -144   
96     48     
-128   144    
-256   496    
112    144    
-80    192    
16     16     
-368   -176   
384    -64    
-1280  -208   
-240   -592   
720    240    
96     240    
-320   1120   
160    176    
-416   32     
-224   -80    
192    -240   
192    -256   
-80    240    
-48    240    
48     -16    
-48    160    
-64    16     
-896   -272   
-48    -48    
448    -144   
64     160    
96     112    
-256   16     
-160   288    
80     16     
160    -80    
-96    -208   
-64    -32    
80     192    
-480   -528   
1360   -400   
416    992    
-672   -384   
912    -752   
-240   32     
160    96     
512    384    
-1040  -1280  
0      16     
240    1040   
-32    384    
-128   -512   
112    80     
-272   32     
160    32     
-112   -304   
144    192    
-752   -336   
96     256    
256    96     
-816   -944   
512    -288   
64     -320   
-384   224    
576    864    
-192   912    
-48    688    
-368   -640   
192    -1472  
-224   -880   
32     -144   
112    320    
-384   528    
432    1200   
-384   -288   
-224   -16    
384    -272   
-32    448    
176    560    
48     400    
48     64     
-128   -112   
96     -208   
384    1232   
672    464    
-864   -1104  
-256   -464   
368    -144   
-496   -144   
176    -400   
480    160    
-256   -352   
-352   416    
-112   -16    
512    -496   
96     -352   
-16    272    
128    304    
336    256    
-48    112    
-320   -48    
288    224    
96     816    
480    144    
-256   -176   
-496   368    
-112   -144   
192    496    
576    304    
-576   -1264  
1088   -2032  
-32    1024   
-96    224    
-880   -336   
880    -1184  
-272   -1056  
272    -304   
-336   -848   
32     480    
368    992    
64     336    
128    -192   
-288   128    
-48    112    
256    384    
-96    16     
-400   96     
64     160    
432    -96    
-32    -288   
32     48     
-48    112    
-624   288    
400    2016   
1328   880    
-1008  640    
32     -416   
128    240    
608    -176   
-592   -80    
160    -32    
160    16     
-16    304    
-304   128    
-144   48     
384    -32    
176    -336   
-176   -112   
-32    -80    
144    -176   
448    -176   
-144   112    
-112   768    
-48    400    
224    192    
-240   -208   
272    -320   
128    -32    
-144   -256   
16     -80    
112    112    
-208   -1632  
-336   -640   
128    272    
64     176    
192    1232   
576    32     
-144   -208   
-96    128    
-16    -96    
496    -96    
-208   -320   
-400   0      
160    64     
128    -192   
48     32     
336    -208   
-96    432    
-224   192    
208    -128   
320    -112   
-176   544    
144    368    
-128   -80    
-80    -368   
624    -16    
-160   -16    
-288   256    
48     32     
240    -80    
-960   -1728  
528    -320   
928    96     
-1024  -48    
1392   160    
-816   128    
16     224    
128    256    
-544   640    
608    -560   
-352   272    
16     -112   
-128   64     
288    -272   
64     -80    
-80    -448   
-96    -416   
64     160    
-32    -416   
352    224    
528    -352   
-1520  896    
864    -48    
-96    0      
-304   -112   
480    64     
-624   320    
96     0      
16     320    
704    -224   
-256   -16    
-416   80     
208    176    
32     -352   
176    288    
112    224    
80     -64    
-448   -112   
592    -16    
-400   128    
352    96     
32     64     
-32    -32    
320    432    
-416   80     
-48    336    
144    -272   
-64    96     
224    -448   
480    576    
-480   160    
192    144    
160    -432   
432    80     
448    272    
-1280  -144   
688    560    
-240   -224   
0      -64    
224    -48    
-192   160    
176    -256   
0      240    
272    -32    
-320   176    
288    16     
-112   240    
-112   -16    
176    160    
-16    -240   
560    1072   
-1008  -64    
272    -192   
160    -192   
-832   -272   
1088   -16    
-816   -192   
224    -144   
48     -32    
-32    0      
-224   128    
16     192    
352    -48    
-80    -720   
48     -48    
-912   128    
288    -784   
64     -272   
64     -688   
96     -144   
-192   144    
-368   -480   
624    336    
-416   -144   
-672   16     
544    -112   
416    -720   
192    0      
-640   -368   
624    -80    
-672   64     
-240   -256   
352    -96    
240    -80    
-432   160    
-192   -288   
32     0      
-32    256    
640    -448   
-464   -1408  
-160   64     
240    32     
112    80     
-48    -64    
96     80     
-528   256    
496    -192   
176    0      
-512   -432   
2672   3056   
-1888  1504   
320    -864   
1664   -3312  
-880   224    
-208   -224   
64     16     
896    224    
-48    48     
-608   -144   
544    -272   
-400   -112   
304    48     
-752   128    
-416   -160   
64     128    
432    -208   
-96    0      
-160   -608   
416    1392   
704    1472   
-272   704    
96     -416   
-160   -128   
-544   -176   
816    528    
32     -80    
-368   32     
-832   64     
336    -32    
0      -576   
-560   -400   
368    -160   
336    -160   
-592   -32    
16     -1616  
96     -304   
48     -688   
96     -128   
32     64     
-208   -128   
80     -192   
256    -592   
-432   -496   
256    -640   
-576   -448   
96     -352   
-176   -272   
-400   -432   
192    -480   
512    -864   
-192   128    
-48    -176   
-752   768    
480    160    
304    64     
-736   240    
96     160    
-48    -96    
96     -720   
-240   -16    
48     768    
192    176    
-128   -96    
128    416    
0      -1024  
-16    112    
-160   384    
-288   -224   
96     112    
128    -400   
-432   64     
-16    80     
-112   112    
64     -288   
-368   -176   
64     32     
-192   336    
0      336    
-448   96     
288    -288   
-256   -160   
528    -1024  
-432   240    
672    -288   
96     48     
-80    96     
0      112    
-32    176    
-208   -96    
-96    80     
-112   -176   
80     -96    
128    -16    
272    64     
-144   -368   
16     112    
-112   -16    
80     112    
48     32     
64     -160   
608    256    
-1488  80     
560    -176   
208    368    
272    -80    
-512   0      
-304   112    
128    -1136  
256    0      
-336   -368   
-944   288    
-192   -176   
320    208    
112    224    
-800   -32    
-48    96     
176    -48    
-240   -32    
80     48     
112    128    
-368   -144   
-96    64     
-144   -240   
-16    128    
-448   384    
464    256    
-128   160    
96     304    
-288   -208   
64     -368   
-1488  -608   
1008   1568   
704    -576   
-1440  560    
928    928    
208    352    
-272   800    
-176   672    
-80    1680   
384    368    
-160   -656   
-256   192    
-80    -352   
-48    160    
0      -288   
80     80     
-272   224    
-208   -352   
-544   288    
0      -48    
320    416    
-1840  -336   
336    -16    
784    -272   
-1136  -1440  
-272   -1664  
464    -416   
-112   -480   
-816   -880   
544    -464   
-416   80     
-352   416    
224    576    
-320   416    
-160   368    
464    -80    
-224   -224   
384    -224   
-112   -144   
-176   32     
160    -16    
-208   80     
-240   -272   
-192   -112   
1120   304    
208    640    
-528   352    
16     192    
-656   -336   
-64    -64    
368    -160   
-224   160    
144    -224   
0      96     
416    272    
160    1312   
-944   1168   
16     464    
16     -240   
-192   80     
-192   112    
-512   0      
80     -16    
288    -272   
-16    224    
-912   -192   
-48    208    
528    -32    
-496   -944   
-224   -160   
-96    3456   
448    432    
-1296  -224   
368    -336   
1024   912    
-656   608    
32     176    
400    192    
-336   96     
208    688    
-368   -32    
-400   -1920  
192    -32    
208    176    
0      0      
80     160    
-256   32     
400    176    
-608   784    
480    1936   
32     944    
-320   -176   
448    16     
-480   -112   
-176   256    
-80    -192   
-736   -288   
448    0      
-656   320    
528    384    
-320   96     
-112   352    
64     272    
80     160    
-16    -96    
32     48     
-800   -96    
400    288    
-16    144    
-144   80     
-336   0      
256    192    
-272   -144   
448    -16    
224    80     
-272   96     
-128   80     
208    240    
48     -160   
0      -144   
-272   64     
-48    -272   
576    -304   
-352   576    
-368   160    
320    -80    
-368   16     
144    -32    
-96    -512   
-32    -96    
0      144    
160    -48    
16     192    
32     80     
-240   64     
-48    -16    
272    480    
368    160    
-432   -496   
-192   288    
160    176    
160    0      
-176   32     
-16    112    
48     256    
-48    -48    
0      -96    
192    -32    
-208   48     
-96    128    
-240   -896   
1056   -2128  
-1632  432    
864    208    
-544   -832   
-688   528    
848    -96    
16     400    
224    -400   
-304   -32    
144    80     
288    64     
32     160    
-176   48     
-64    -608   
0      384    
176    128    
-192   32     
16     80     
96     48     
16     240    
304    1552   
1072   -112   
-1168  -432   
208    192    
400    64     
-320   208    
208    -16    
16     368    
-16    -128   
-160   208    
512    -128   
-64    352    
-160   80     
208    240    
-304   32     
-128   480    
528    -80    
-112   96     
144    -208   
-336   96     
368    96     
-240   144    
464    176    
-384   -224   
96     256    
176    -208   
-240   -464   
368    96     
-160   160    
-256   624    
128    1152   
-464   704    
-64    -96    
0      128    
512    256    
-192   272    
-384   240    
432    256    
-48    128    
224    144    
-304   64     
112    -176   
80     80     
-304   -1168  
320    128    
-240   80     
256    64     
-144   96     
-48    80     
96     112    
288    96     
-1232  80     
672    288    
-496   -192   
384    -128   
416    80     
-592   -288   
560    464    
224    -272   
-48    -80    
16     144    
-128   64     
16     96     
112    192    
288    -32    
-448   208    
16     -544   
-144   -512   
176    112    
64     304    
-240   -112   
576    -16    
-48    -176   
-464   -368   
480    64     
-96    -960   
-192   -224   
-208   288    
432    208    
-384   -320   
0      160    
208    128    
80     64     
-16    64     
-128   -64    
176    192    
-64    -80    
-208   144    
608    -416   
-656   16     
240    -336   
336    80     
-128   224    
-64    0      
-80    0      
160    144    
-48    96     
96     48     
-128   864    
800    1264   
-560   -480   
-256   0      
1584   -240   
-1248  -16    
-368   0      
672    -272   
192    -16    
-160   -544   
-336   -96    
0      320    
352    -48    
16     224    
-64    -80    
-112   48     
352    -208   
128    176    
-160   -512   
-176   -80    
432    -1280  
-208   -96    
192    -32    
32     608    
-560   96     
336    -144   
96     -112   
224    112    
-368   -176   
304    -656   
96     -768   
-176   -448   
224    864    
16     -336   
256    -80    
-176   -144   
208    256    
-112   -512   
-144   -80    
480    -1008  
-304   -352   
32     -16    
80     160    
192    -32    
-176   -64    
-32    816    
560    208    
-672   -800   
224    -1328  
256    368    
-96    432    
-32    0      
128    464    
-240   -416   
-384   -736   
480    -544   
-576   720    
304    -16    
80     -176   
-336   224    
80     -176   
-160   -48    
96     -368   
80     -96    
-16    304    
0      -208   
-80    384    
64     576    
-80    -448   
-288   16     
128    -480   
144    -32    
16     -336   
144    80     
-272   16     
80     16     
176    -16    
80     -544   
96     48     
-400   -672   
128    112    
48     112    
-48    80     
240    -400   
-400   256    
880    -128   
-256   144    
-160   416    
-96    -672   
32     -336   
-160   -64    
48     0      
-416   -208   
240    -64    
240    -432   
432    -32    
-912   -3008  
320    -256   
288    -320   
0      -64    
128    64     
-192   32     
48     -384   
-816   48     
544    144    
-128   192    
-1104  128    
-16    -48    
352    240    
-448   880    
48     -208   
704    -1264  
-96    176    
-528   416    
272    -32    
160    -448   
-64    128    
0      256    
96     816    
-128   224    
224    32     
-192   64     
-160   -176   
48     -80    
48     -480   
-144   -16    
192    0      
-144   48     
-160   -2464  
160    -160   
160    -384   
-544   -512   
912    -624   
480    528    
192    160    
-80    816    
-512   288    
96     -256   
-464   -1408  
-1168  -2224  
-64    96     
256    1296   
224    384    
432    -1888  
-304   -80    
-432   272    
512    224    
48     -112   
48     176    
-208   304    
64     640    
-16    112    
-160   -1008  
-352   96     
1088   -816   
-1584  -848   
720    -80    
368    1248   
608    1152   
-496   592    
464    432    
208    -80    
-272   80     
48     -272   
224    192    
128    -64    
-304   112    
464    -48    
-288   48     
160    -496   
-176   -32    
224    -80    
32     192    
-128   -176   
304    112    
624    -400   
224    -784   
-784   192    
304    -128   
32     -64    
-80    304    
16     -432   
-352   192    
416    -32    
-256   -176   
-384   112    
-16    -592   
128    -272   
752    -1120  
-736   112    
-64    160    
176    -64    
-32    -80    
-128   32     
-256   -224   
-512   240    
512    -288   
-592   0      
-160   64     
-32    -32    
-64    -864   
880    3424   
-1248  2048   
-1040  -1008  
1552   -464   
-656   128    
-1440  -80    
224    496    
-144   -272   
-32    32     
-512   -352   
16     256    
240    80     
16     -32    
320    0      
-144   112    
-64    -96    
48     112    
144    -16    
-336   -400   
656    384    
-464   -160   
-240   288    
-208   -224   
64     96     
608    -192   
-352   608    
208    48     
-128   288    
176    -160   
-16    48     
16     -144   
96     -176   
32     80     
-336   32     
48     32     
320    192    
-224   -128   
-288   -592   
-640   -320   
464    192    
-176   144    
240    -16    
-288   80     
-272   48     
160    160    
-176   -48    
224    -64    
-320   0      
64     96     
0      32     
144    112    
-176   -336   
272    -432   
-32    48     
240    832    
768    208    
-1552  -96    
608    0      
64     -80    
272    -208   
-320   -16    
-96    32     
192    48     
-64    -16    
192    -224   
-272   48     
208    -32    
-224   96     
-96    -256   
-224   -128   
0      -16    
-528   -176   
128    144    
-160   -80    
320    288    
-400   32     
48     96     
-48    96     
112    304    
96     80     
-480   -160   
1648   2672   
1072   528    
-1456  272    
496    -144   
-448   16     
736    -96    
-208   192    
-608   -480   
-240   48     
112    416    
144    -128   
-96    192    
32     -64    
-48    176    
320    -112   
-448   544    
144    -16    
16     112    
-240   320    
64     32     
-800   -976   
1008   -176   
-1600  -32    
-800   176    
976    224    
-144   -32    
-224   176    
-272   -224   
0      144    
416    80     
32     144    
-368   -112   
-16    -16    
256    240    
-240   368    
32     32     
-96    48     
-544   112    
592    -48    
-512   192    
304    16     
-112   160    
-16    -16    
304    256    
-240   112    
-272   320    
368    0      
0      16     
-304   112    
1424   1296   
-1632  480    
-1504  400    
2000   -32    
-816   -144   
-592   368    
992    544    
-416   224    
-16    128    
336    64     
64     16     
-192   48     
-112   128    
480    256    
-624   16     
352    368    
-128   -64    
-48    0      
48     -240   
-80    0      
16     96     
176    208    
-1504  528    
1024   336    
48     352    
-432   48     
400    -32    
-320   144    
-416   528    
-32    -256   
240    64     
-32    -16    
-64    64     
-96    144    
112    192    
96     -112   
-128   288    
-48    64     
432    -128   
-144   208    
-144   208    
256    -224   
800    -192   
-928   640    
32     -336   
464    128    
-736   256    
-64    -128   
464    48     
208    80     
-176   80     
-128   144    
160    -64    
64     32     
48     144    
320    336    
688    320    
-1008  224    
432    304    
-624   -432   
0      32     
192    256    
-160   16     
352    272    
-48    -16    
208    352    
-784   384    
-112   112    
592    240    
-272   368    
624    1984   
-896   1024   
432    -96    
1952   -352   
-1184  -192   
-688   368    
1008   -416   
-992   -1136  
-208   -1072  
16     -16    
416    304    
-288   -240   
-48    -272   
304    144    
0      496    
-48    -96    
96     880    
-448   -80    
-16    528    
656    752    
-192   176    
16     208    
0      -160   
-256   192    
-112   -416   
-80    -512   
-64    -672   
288    -80    
-16    -144   
80     656    
96     384    
-112   -128   
384    -320   
48     272    
-240   -48    
-320   -832   
304    -464   
-144   -928   
80     480    
80     720    
-128   112    
256    64     
160    -320   
-48    480    
352    1056   
-128   992    
384    96     
-112   336    
128    832    
-16    -128   
128    272    
544    -16    
-688   320    
688    -32    
48     672    
-112   448    
-240   464    
256    1056   
176    128    
-256   -688   
224    80     
-112   384    
80     -400   
-64    80     
256    128    
-256   -128   
320    -48    
-80    -592   
-448   -160   
144    -656   
-400   160    
416    96     
48     192    
-80    -160   
-32    64     
176    80     
-48    160    
544    -16    
-640   -128   
-144   400    
512    -240   
16     624    
-160   -496   
352    16     
160    -208   
-32    -112   
0      336    
96     368    
-352   96     
480    16     
-96    -96    
-128   144    
-192   64     
272    -80    
-80    16     
-144   16     
-16    -144   
-96    -496   
96     -208   
16     -608   
48     112    
-256   -1408  
384    160    
-256   352    
-80    688    
128    496    
224    -240   
400    -48    
-672   -192   
64     320    
560    -592   
0      176    
-352   496    
80     80     
-224   -816   
160    -304   
240    160    
432    -208   
-560   -656   
-64    528    
64     1072   
576    -352   
-112   -208   
-544   -128   
-16    80     
544    432    
32     288    
-432   -624   
32     -160   
-80    -320   
-96    0      
416    224    
1760   176    
-1184  48     
-528   112    
1408   144    
-1376  -16    
560    -32    
768    976    
-208   608    
-288   -96    
96     64     
96     -240   
64     208    
128    48     
-160   368    
32     -32    
224    -240   
-80    96     
144    -256   
48     -32    
656    1040   
-1824  336    
304    160    
736    -800   
-720   -272   
480    112    
192    -384   
-496   368    
272    96     
-32    -320   
-128   128    
-96    16     
-96    -80    
480    -48    
-272   -576   
-576   -48    
176    -112   
288    -224   
-208   -448   
240    -176   
-48    -240   
-624   -352   
576    -288   
80     144    
-192   -80    
-128   -208   
336    -336   
-80    -496   
336    0      
32     80     
-528   112    
80     160    
-32    -224   
-352   -192   
32     -144   
112    -176   
272    304    
-32    -1888  
240    432    
64     160    
-576   96     
32     -32    
256    96     
-112   -80    
-128   -96    
464    -608   
-832   48     
320    80     
-224   -1104  
-32    -1184  
2096   -960   
800    -816   
-1424  -704   
-592   400    
480    -288   
496    224    
160    -128   
-368   288    
-336   -16    
160    48     
432    64     
16     -16    
-48    -144   
128    -160   
0      -80    
96     -80    
144    -32    
-112   -560   
64     -288   
-880   -1712  
1008   -80    
-640   -64    
816    -32    
224    64     
-384   64     
-384   144    
960    288    
-928   -176   
128    288    
-1072  -96    
16     176    
16     -80    
-32    -112   
336    -272   
-912   -992   
592    -128   
224    272    
-192   -16    
-304   48     
96     80     
-80    0      
320    80     
-512   -64    
256    -224   
-32    48     
208    -208   
-144   32     
96     -432   
-48    96     
384    -368   
-128   192    
-160   -800   
-640   -80    
688    -80    
-336   368    
160    96     
-128   -160   
-64    -176   
64     -112   
224    -160   
64     -112   
-256   -80    
256    -336   
320    320    
-48    -128   
-560   -256   
112    -944   
-64    192    
48     384    
496    -240   
-736   128    
80     224    
256    -48    
80     -192   
-272   48     
208    48     
-352   144    
288    -576   
-160   0      
-240   144    
176    1856   
-1328  -2272  
-832   480    
1696   -832   
-912   -64    
192    160    
-176   208    
768    672    
80     -208   
-400   -240   
48     128    
0      128    
224    -80    
-160   -16    
-192   -1056  
-656   592    
144    0      
-464   -336   
144    -272   
-1088  96     
-80    320    
816    1520   
112    -208   
-912   -352   
400    -48    
-80    -208   
128    64     
-176   -464   
128    384    
-480   256    
-80    160    
224    16     
352    -144   
-432   48     
-416   -16    
208    128    
-512   -64    
-240   320    
160    -112   
-256   160    
128    -160   
48     32     
-32    -112   
-96    0      
96     -16    
-288   -64    
80     144    
-128   64     
-16    0      
-96    -144   
-336   368    
-1408  -736   
672    -416   
-336   -416   
64     -176   
656    -112   
-992   -48    
320    -400   
160    -288   
-336   0      
32     64     
288    304    
-320   176    
-16    80     
-112   -96    
16     -176   
-480   -32    
128    -112   
-256   -192   
-144   -48    
0      32     
-96    -944   
-80    80     
1056   -80    
-1936  160    
384    112    
304    -256   
-992   240    
464    0      
-528   -192   
448    -192   
96     80     
-304   144    
-256   224    
368    192    
-48    -64    
-160   144    
-80    -240   
-384   -48    
144    16     
352    -176   
80     96     
128    512    
-144   -352   
-32    80     
0      176    
-928   -1392  
464    64     
32     352    
-672   32     
112    -96    
80     80     
0      240    
-48    16     
576    48     
144    80     
-608   0      
336    -800   
-144   480    
512    448    
192    32     
-160   16     
-48    144    
-224   -80    
272    -112   
-1392  144    
256    96     
-336   112    
704    432    
-112   384    
-624   -160   
960    1232   
1584   544    
-1904  -48    
-80    -1312  
560    -1104  
720    -368   
-208   1600   
-320   800    
32     -96    
288    240    
240    432    
-288   -32    
-128   -64    
-144   -16    
320    48     
128    -336   
-64    -112   
-48    -176   
-336   -272   
224    64     
0      368    
176    -96    
-384   -128   
240    -80    
-336   -128   
16     496    
320    1200   
-144   -544   
-144   96     
144    208    
64     48     
160    176    
-176   0      
112    144    
112    -592   
-544   -928   
384    256    
16     -112   
0      -736   
-192   -48    
288    368    
96     240    
-48    0      
48     384    
-160   400    
272    -208   
96     32     
-96    928    
0      304    
-192   112    
576    672    
-800   288    
128    720    
240    1808   
0      1120   
176    400    
160    352    
416    -416   
-80    -160   
-304   -192   
32     304    
112    -144   
16     224    
48     96     
-16    -48    
-384   -96    
288    -640   
-224   304    
-496   1184   
-272   -48    
224    64     
-80    112    
176    96     
-288   544    
112    -176   
48     96     
-96    -400   
-656   -384   
208    -112   
-112   192    
1024   -160   
-1264  576    
-144   256    
416    96     
192    -208   
224    -240   
128    -352   
-176   -528   
-16    -112   
352    128    
-192   336    
-64    -160   
-224   0      
-112   192    
-16    0      
128    -128   
128    -688   
-224   144    
16     176    
272    -32    
-96    -736   
-288   -544   
224    -256   
-16    448    
128    816    
-208   320    
-256   240    
288    48     
-64    48     
192    -288   
-192   464    
-256   -160   
-144   272    
512    -144   
192    -144   
-544   96     
32     -176   
-80    48     
176    192    
208    96     
96     -240   
-48    -304   
32     16     
-160   -368   
64     304    
224    0      
-176   -768   
352    16     
304    -672   
-1520  1200   
1520   656    
1376   96     
-1408  208    
1088   96     
-608   176    
-96    368    
656    288    
-640   -144   
48     -192   
-192   16     
336    208    
192    -64    
-128   96     
-512   -144   
560    192    
0      128    
-48    -192   
-32    16     
160    -80    
64     16     
400    320    
-1696  240    
1152   176    
-384   144    
192    -192   
240    224    
-336   -144   
192    656    
-288   -96    
160    -16    
112    -2128  
-144   96     
80     208    
96     -112   
176    192    
272    -64    
-416   -416   
448    -368   
80     -224   
256    -48    
-16    -48    
112    368    
224    48     
96     -432   
304    432    
-240   -768   
112    720    
-448   -48    
160    464    
800    -80    
-160   32     
-528   -32    
272    400    
240    -80    
96     -144   
400    -528   
-592   -480   
256    -32    
176    -16    
656    224    
128    0      
-608   272    
-16    -144   
480    80     
-32    -480   
-480   192    
240    160    
-336   80     
656    960    
864    -2128  
-3184  -544   
1424   -16    
768    32     
-704   -16    
-400   -176   
176    -272   
528    288    
-384   -128   
272    128    
192    160    
176    -176   
-320   -160   
128    -592   
-336   -80    
384    -208   
112    96     
-400   -96    
-256   -192   
1184   -416   
-368   -192   
176    -144   
-144   112    
-672   -112   
512    128    
288    -16    
-480   -1760  
448    -224   
-656   -528   
528    -368   
-496   -96    
432    288    
-64    32     
96     240    
-96    16     
-336   64     
224    224    
-64    64     
192    -48    
416    -272   
-352   32     
64     -304   
208    16     
48     -144   
32     -16    
224    -16    
-448   -1376  
352    -112   
64     400    
-96    112    
160    80     
-256   -32    
368    -144   
-352   576    
272    -1024  
-592   -336   
80     -320   
320    240    
80     96     
-192   -256   
32     -80    
-48    -80    
144    -176   
144    -912   
-288   48     
224    96     
-128   -144   
192    -384   
-96    256    
240    -400   
-32    80     
-272   208    
352    352    
-32    32     
-48    -80    
-16    448    
-192   -176   
144    -400   
128    -512   
-80    176    
-624   -3312  
1696   -1680  
-880   656    
896    272    
-1040  544    
80     -336   
160    -368   
784    112    
-496   416    
-448   256    
-1168  -128   
464    -304   
-16    64     
-16    -352   
-48    544    
128    -320   
-112   48     
256    -320   
-80    -112   
128    336    
96     64     
-448   -1088  
960    -448   
-896   -128   
64     240    
16     1040   
32     256    
208    224    
-320   -256   
-128   -64    
240    240    
784    784    
-640   -176   
64     -160   
16     -176   
208    -448   
112    -416   
-352   176    
128    816    
432    16     
-144   -320   
112    -272   
0      64     
16     224    
128    32     
112    -224   
-192   80     
112    -1616  
-112   48     
64     -352   
1184   496    
-944   1856   
-368   528    
928    -432   
-1472  -304   
96     128    
464    -224   
-256   496    
-112   128    
304    -80    
304    -848   
-304   -240   
-80    -832   
480    208    
-576   -576   
96     -256   
-32    -48    
-336   -224   
-256   224    
96     512    
-144   368    
-64    -784   
-240   528    
1728   -624   
-2000  32     
432    -32    
592    -176   
208    -1280  
-656   -1424  
48     -112   
432    -176   
-96    128    
-80    -208   
-176   -224   
32     -560   
-96    -256   
0      -128   
-432   -992   
-592   -1232  
400    -528   
-240   -320   
128    48     
-720   -352   
0      -336   
-384   -720   
-704   -800   
528    -992   
-368   384    
-64    656    
80     -96    
-208   -288   
144    -272   
-96    -656   
-1024  -672   
592    -512   
-448   -176   
-272   352    
-80    -928   
-320   -496   
672    -608   
-160   64     
160    192    
16     176    
-208   -144   
-256   0      
272    -16    
208    -64    
96     -160   
240    32     
-112   240    
-848   -784   
1344   -192   
640    -400   
-1600  -288   
-80    80     
288    -1376  
32     -80    
-48    384    
-928   1056   
-432   -608   
160    -208   
272    736    
-64    -320   
-80    176    
-16    -320   
400    -256   
-176   400    
240    144    
-16    -64    
-224   -176   
-16    -544   
112    16     
-176   0      
-576   -96    
224    -304   
-96    16     
96     -448   
-48    352    
-640   -1024  
224    288    
480    256    
-144   48     
-80    224    
-16    -128   
64     -16    
112    656    
192    640    
-128   -64    
96     832    
240    336    
-288   -752   
144    -592   
112    160    
48     64     
-208   144    
-64    -112   
272    -208   
256    896    
-800   -992   
-160   -400   
592    224    
368    1040   
-640   -400   
-800   -1088  
384    -1056  
144    -1056  
-976   32     
0      -624   
-160   336    
384    544    
0      -1152  
-48    -960   
-304   80     
-80    384    
192    -144   
-144   -64    
-112   208    
160    496    
128    496    
-336   288    
48     -320   
-240   -112   
-128   288    
144    0      
-32    352    
0      784    
304    352    
-304   16     
320    -208   
480    -160   
-48    -128   
-288   -1696  
-720   544    
768    -464   
-224   -352   
288    1152   
-192   192    
-256   176    
-736   64     
64     16     
160    -528   
-208   -224   
0      32     
80     592    
0      288    
-144   80     
96     336    
304    128    
32     192    
-48    160    
-32    224    
-256   -608   
752    -1056  
-480   800    
176    240    
-80    224    
224    1072   
208    80     
32     720    
208    256    
-128   48     
-64    96     
-112   -80    
-80    320    
16     -112   
-192   160    
-48    -32    
304    -64    
96     128    
-112   16     
-80    80     
320    160    
-112   -48    
48     96     
0      -256   
-368   96     
720    96     
-240   112    
80     16     
-352   192    
-448   -480   
992    656    
1104   416    
-1472  -64    
32     -240   
928    48     
-32    144    
-240   0      
400    192    
48     -112   
-400   176    
304    176    
0      16     
-96    272    
-32    0      
-144   240    
176    16     
-144   112    
-416   -64    
352    112    
-192   -16    
32     176    
272    544    
1136   -16    
-912   384    
832    16     
-448   256    
48     464    
352    144    
-80    240    
64     144    
-176   112    
-224   16     
176    64     
144    -32    
80     240    
0      64     
32     256    
48     96     
-16    -224   
320    -96    
-80    128    
-240   96     
-224   320    
608    464    
-864   -80    
-880   80     
368    -160   
-912   -160   
-64    48     
672    80     
-384   112    
-224   128    
-64    32     
416    320    
-80    -32    
384    192    
-720   64     
-32    496    
48     208    
576    -448   
-368   144    
-48    160    
160    208    
208    0      
-224   64     
192    144    
160    144    
416    -16    
-256   80     
-576   -1792  
768    -944   
128    -1120  
-368   -288   
560    112    
-832   -336   
320    368    
-80    64     
208    32     
432    48     
-160   96     
-176   32     
64     144    
656    112    
-464   32     
-48    16     
-48    192    
96     80     
-64    32     
720    592    
-960   304    
608    528    
16     0      
48     -160   
288    112    
-368   80     
208    240    
256    176    
-128   -16    
-32    352    
48     -80    
96     272    
0      0      
-80    -352   
128    -80    
-48    -576   
-128   16     
224    -16    
64     512    
-80    288    
128    320    
-64    -48    
-224   -32    
176    -256   
112    160    
0      48     
48     176    
96     -32    
-16    -288   
160    448    
-96    320    
0      448    
64     -816   
336    -176   
-384   -1840  
-64    -96    
416    -32    
208    704    
-400   1280   
256    880    
-16    96     
208    144    
-16    32     
-176   -16    
144    272    
240    128    
48     240    
-48    -432   
96     -176   
32     -544   
-256   -608   
240    -512   
-144   -16    
16     -400   
160    16     
32     -128   
-80    -464   
-160   304    
352    368    
128    432    
64     -256   
-464   -1072  
768    -2912  
-256   736    
1216   -848   
-688   192    
192    -1248  
-128   -272   
48     352    
224    -352   
-176   -448   
32     304    
160    128    
-16    -496   
-80    96     
144    -304   
208    -224   
-112   -144   
288    160    
128    -224   
96     -240   
-336   336    
528    576    
-192   -96    
-160   -640   
-80    -544   
80     688    
240    688    
48     -928   
0      288    
-160   -48    
224    -160   
416    384    
-176   288    
-32    144    
80     -144   
320    -128   
-96    240    
0      512    
-144   -608   
-288   -640   
256    -400   
416    -1248  
-48    -192   
-144   256    
-112   320    
144    -16    
160    -512   
0      80     
-112   -576   
0      -416   
1120   1920   
-720   -416   
-1200  -96    
2352   320    
-976   224    
-624   -320   
240    -32    
-32    -304   
240    -16    
-112   -288   
160    -288   
-32    -272   
112    -16    
32     64     
-112   48     
64     -32    
96     -224   
-32    448    
160    -224   
-80    64     
80     -144   
-800   320    
1952   -544   
-400   752    
-1104  -272   
320    -1616  
160    -592   
-416   -1456  
224    1328   
432    2128   
-608   -176   
640    -1344  
-128   64     
-336   416    
128    128    
-128   -160   
-112   -256   
48     -32    
-336   -336   
32     224    
336    -256   
-176   -224   
176    -1776  
-224   32     
-448   -1360  
-240   -240   
800    1216   
-848   96     
160    -64    
416    96     
-544   -320   
160    -464   
-1904  -160   
704    -160   
336    592    
-64    0      
208    -112   
-288   224    
912    816    
-544   304    
-160   -400   
304    496    
288    -656   
224    -720   
-320   -832   
544    -528   
-224   352    
-96    528    
48     288    
80     160    
-736   -1648  
1488   -880   
752    512    
-640   496    
-416   272    
80     -1536  
-96    -1344  
400    -128   
16     720    
-240   144    
-320   -48    
288    -352   
16     -224   
80     448    
-1408  -144   
-80    -256   
0      -272   
96     112    
-48    -144   
-48    -1392  
160    560    
160    368    
-208   -400   
-256   320    
144    -976   
-736   -704   
320    -288   
-48    -496   
-192   -256   
-64    16     
400    1232   
80     1040   
240    -48    
-96    -96    
-32    -320   
-288   -480   
128    96     
-16    16     
-304   -128   
32     16     
16     -32    
0      -112   
16     -208   
16     -192   
448    304    
-592   -512   
64     -64    
416    208    
-272   -336   
-80    -1264  
-80    -368   
464    576    
-1040  368    
224    -32    
336    -672   
-400   -1120  
-160   -896   
256    -816   
-48    -960   
-272   160    
-80    224    
144    368    
160    -112   
-256   496    
-304   32     
368    -416   
32     176    
144    176    
-160   496    
32     288    
0      384    
352    16     
-208   16     
-176   -64    
-96    -16    
-304   -640   
480    -1040  
-544   -640   
128    -48    
224    256    
-688   -240   
944    1280   
-224   256    
-496   -448   
-176   368    
-16    -112   
608    288    
32     32     
48     0      
-80    160    
-224   -96    
384    -112   
16     -176   
-112   224    
16     -288   
48     272    
32     -400   
0      208    
96     208    
-320   -160   
208    -80    
-160   1504   
-2032  -32    
48     304    
1088   -176   
-1360  -384   
672    -144   
-368   0      
176    -64    
-432   336    
400    48     
128    -32    
-192   -16    
-160   -32    
0      128    
-208   -80    
-256   -64    
160    80     
-96    -32    
-144   64     
32     -16    
416    128    
-320   80     
112    64     
-144   192    
128    192    
160    112    
-224   32     
144    48     
-240   128    
768    -576   
-1712  -1056  
576    -496   
-672   -272   
448    416    
64     -320   
-144   640    
128    320    
-560   304    
496    -96    
80     -48    
-256   -16    
-192   80     
240    304    
208    144    
-640   144    
272    -144   
-496   160    
-256   -16    
-112   96     
32     -48    
496    976    
-448   -640   
-1296  608    
1680   -384   
-1680  208    
1088   48     
-32    80     
-352   -80    
304    96     
-224   0      
-304   -160   
112    144    
48     48     
128    192    
-272   32     
-80    -64    
-16    80     
368    -288   
-224   256    
208    64     
-256   -112   
624    -144   
-352   16     
-48    96     
-96    160    
160    96     
432    -16    
-96    416    
608    32     
-464   112    
-160   -176   
208    -128   
48     64     
-400   48     
448    240    
-384   -64    
160    464    
-128   96     
-176   224    
32     192    
208    -96    
48     64     
-48    48     
-32    16     
304    112    
48     32     
-224   32     
-32    128    
0      -208   
288    -5312  
-2336  -2000  
1568   1168   
80     144    
160    -16    
96     368    
-512   0      
80     272    
-160   240    
640    80     
-400   160    
-112   112    
224    224    
0      -16    
-208   16     
144    64     
-64    112    
240    64     
304    368    
-432   672    
208    928    
304    176    
-224   -128   
-208   32     
288    192    
-256   16     
512    416    
-368   208    
-224   560    
368    96     
-208   256    
208    272    
-16    144    
176    192    
-432   384    
496    592    
16     32     
48     304    
112    224    
-368   128    
384    144    
-80    208    
96     80     
16     -304   
-400   -352   
32     560    
384    1296   
112    512    
-208   176    
240    32     
-80    -288   
-160   -752   
0      48     
144    592    
-224   368    
400    320    
80     544    
304    288    
-272   320    
-160   288    
400    160    
32     144    
-96    96     
160    640    
-192   688    
400    112    
128    272    
-320   -1648  
-288   -176   
192    -512   
304    336    
-64    256    
-192   256    
-64    64     
64     48     
96     -272   
-256   -256   
0      208    
-112   -368   
160    384    
336    -48    
-1072  1296   
816    -1056  
-112   -320   
-944   368    
368    352    
624    480    
-480   1296   
-320   -32    
480    -160   
48     176    
208    -288   
-192   304    
-64    -192   
48     304    
400    48     
-208   368    
-32    -160   
32     560    
0      96     
-64    256    
16     896    
656    -256   
-576   288    
-256   832    
384    -176   
256    -64    
-80    240    
64     416    
-224   240    
-16    240    
176    -32    
176    -336   
-32    256    
304    -1024  
-384   304    
176    368    
576    304    
-512   416    
-80    -112   
544    -176   
128    336    
-112   -64    
-304   192    
-208   -80    
96     16     
464    -32    
-240   -560   
-96    16     
256    -800   
864    768    
-160   784    
-624   384    
832    528    
-80    384    
-384   128    
-128   -48    
624    -832   
400    704    
240    480    
-112   496    
96     -384   
64     -368   
-16    304    
208    -64    
64     -64    
-128   -1200  
-496   -64    
800    128    
-32    576    
0      -400   
-768   -32    
1360   -400   
-496   -832   
-352   -720   
608    -752   
-400   -432   
-464   -992   
416    1008   
624    1040   
-256   1008   
544    192    
208    -272   
-448   -160   
224    32     
304    272    
64     96     
-464   -32    
304    80     
320    400    
-96    112    
176    64     
208    192    
-208   384    
288    -912   
-96    -1264  
352    -1456  
-32    -768   
480    -672   
304    -128   
-112   112    
400    688    
48     320    
-464   -1056  
160    -112   
-16    -128   
-560   256    
-464   -1072  
400    -288   
128    -64    
-336   0      
544    176    
-112   -352   
576    -176   
-224   96     
592    448    
-272   336    
-96    80     
96     304    
272    304    
1056   2080   
-832   1600   
800    -464   
480    -144   
-464   192    
160    48     
-320   1344   
1296   -32    
-224   -96    
-1056  64     
320    144    
480    -480   
272    -1168  
-432   -144   
-80    -1056  
128    -48    
192    80     
0      -224   
-544   -704   
-48    -1136  
272    -64    
208    0      
-32    48     
-656   32     
544    -96    
48     32     
-32    -400   
224    -224   
-352   -80    
96     -32    
512    128    
-144   288    
256    -32    
-544   -2944  
-176   -32    
352    96     
112    -272   
-144   -544   
112    0      
176    16     
-64    -32    
-288   -304   
208    -256   
-848   -224   
-288   -160   
288    -112   
144    528    
400    -128   
-128   -1440  
128    -208   
144    -208   
272    976    
-304   256    
-336   -96    
64     -336   
-48    64     
144    160    
32     208    
-400   48     
256    -32    
128    -112   
16     32     
-32    160    
336    -128   
0      96     
-48    -880   
128    176    
112    -256   
-256   -224   
496    128    
64     -96    
-128   -176   
80     128    
96     -80    
48     0      
-192   -224   
-960   496    
496    -16    
-16    -160   
-144   64     
128    -784   
-480   1120   
2752   -640   
-1376  336    
-80    -64    
480    48     
-144   -432   
-256   -96    
192    64     
-208   -192   
-32    0      
224    80     
-16    -128   
-64    -512   
224    -96    
16     -512   
96     464    
96     -448   
-176   64     
64     80     
-32    -112   
544    -512   
-1600  352    
752    -352   
224    496    
128    -336   
-128   -192   
-1696  -64    
128    -416   
336    160    
176    -96    
32     160    
-128   -1424  
64     80     
-304   -80    
560    -96    
-272   112    
208    144    
-32    32     
208    -80    
32     -32    
-160   -192   
16     64     
-112   -96    
352    256    
-176   -384   
-192   256    
464    -768   
-416   -144   
176    16     
432    864    
-288   1360   
464    304    
48     -80    
-16    -224   
-128   0      
-128   -256   
-352   144    
576    -336   
16     112    
16     -304   
-128   144    
144    -320   
64     -80    
224    0      
-464   -160   
256    48     
208    80     
-448   -32    
368    112    
-80    -16    
-144   -448   
976    864    
-736   -48    
-112   0      
-352   -64    
-848   128    
32     -32    
400    256    
16     -64    
-224   -208   
-192   144    
224    0      
-240   -48    
128    160    
128    -48    
-368   0      
256    144    
32     48     
208    336    
-352   48     
-64    80     
128    16     
-1088  64     
192    -144   
-16    48     
-64    96     
-256   -32    
-384   -944   
352    -208   
-112   432    
-272   -144   
144    160    
-352   -48    
16     208    
-240   0      
-128   -112   
-272   0      
576    176    
-64    224    
416    -48    
-336   144    
64     160    
-80    -80    
32     -16    
-16    112    
112    -16    
-128   128    
352    -96    
-192   160    
-64    -144   
1632   -1040  
48     -16    
-864   144    
-720   32     
-192   48     
992    208    
-576   32     
-80    192    
-288   -176   
-416   304    
416    -96    
0      96     
16     -128   
-16    -80    
288    400    
-560   64     
160    256    
-112   -224   
-32    -800   
-192   -576   
-16    160    
96     112    
-464   256    
464    -80    
-368   304    
-336   224    
352    144    
-432   -176   
112    336    
80     720    
416    736    
-144   464    
-416   0      
192    336    
576    496    
-208   176    
-800   -928   
160    -80    
112    -32    
-208   48     
-144   16     
-176   -16    
-96    -16    
32     -176   
272    -224   
16     -320   
-144   128    
-464   -672   
368    -368   
0      624    
-160   288    
384    -160   
-80    368    
16     128    
-96    32     
-336   128    
608    1008   
96     -1056  
-384   -112   
160    272    
-192   208    
16     -48    
-32    128    
352    496    
-544   -224   
96     -400   
32     -368   
-352   -96    
0      -144   
240    -336   
-288   96     
160    128    
-48    0      
176    128    
-272   -112   
48     176    
176    96     
32     -96    
-16    -144   
-32    176    
-224   128    
-352   672    
1184   -208   
-768   256    
-16    96     
368    -16    
-96    240    
336    -80    
-192   112    
-192   192    
176    16     
128    -32    
0      80     
-160   16     
272    -16    
-144   160    
432    -176   
-80    256    
16     128    
-32    64     
16     256    
-16    112    
-48    -64    
816    -48    
-512   128    
-208   128    
176    144    
-192   400    
160    -96    
256    -112   
64     112    
-32    272    
-80    96     
-48    -128   
160    384    
240    96     
-400   288    
144    432    
32     816    
-128   192    
-16    -144   
208    -16    
-48    64     
112    256    
80     -48    
64     176    
-48    80     
400    -32    
208    -256   
-544   112    
864    -448   
-3072  -896   
896    320    
272    -352   
-80    -416   
-16    -64    
144    -800   
256    800    
-288   416    
144    -528   
-80    368    
-224   -352   
320    256    
-272   -640   
-192   384    
240    16     
-80    -80    
32     -592   
-464   192    
128    768    
-112   -208   
1264   -32    
-1888  -208   
848    64     
336    128    
-480   688    
368    208    
816    1232   
384    1040   
-352   1312   
16     384    
-320   -64    
160    -256   
496    -352   
32     144    
-128   272    
-16    -32    
352    784    
480    400    
144    656    
-624   768    
-16    224    
480    560    
-704   -432   
64     -1088  
112    -96    
560    -592   
-480   -112   
416    -256   
-496   160    
272    144    
240    336    
-272   -48    
-384   -96    
128    -768   
-320   288    
256    -272   
-576   -224   
544    288    
32     -384   
-560   160    
336    16     
16     -224   
496    80     
-240   112    
272    32     
528    144    
0      64     
80     912    
-608   -384   
-720   -2720  
-224   -512   
-208   -96    
112    240    
1328   -96    
-672   208    
-96    -1680  
-640   320    
592    -128   
-416   96     
352    80     
-432   -32    
64     -160   
448    -32    
-336   -16    
272    16     
-272   32     
48     0      
720    -288   
-1072  -1584  
288    -576   
32     -416   
32     0      
704    192    
-592   -32    
-16    288    
96     -32    
64     128    
-304   16     
160    32     
-224   -96    
272    -48    
-16    -112   
96     320    
336    -112   
-272   352    
16     -464   
-176   272    
656    -736   
-224   128    
-112   16     
-32    128    
16     -112   
256    16     
160    -224   
-320   400    
624    240    
-224   -128   
128    -320   
-432   -288   
272    32     
304    384    
-928   416    
384    -816   
-16    160    
384    -96    
-208   288    
352    80     
48     288    
-96    128    
80     -64    
48     16     
-176   192    
224    272    
-80    224    
16     96     
32     -880   
-160   -336   
240    208    
-272   128    
192    80     
208    -32    
-176   16     
-16    160    
16     -16    
-16    352    
-48    -80    
32     -448   
-16    400    
96     -320   
-448   -1024  
1280   -1984  
-1424  512    
928    -368   
-80    240    
-736   192    
304    432    
832    112    
-272   -224   
-368   128    
80     -144   
240    -48    
336    -144   
-240   144    
80     288    
208    208    
-304   -176   
416    160    
-288   64     
0      -320   
32     176    
480    -224   
1168   -400   
-1200  -304   
192    -720   
864    -128   
-384   -704   
-144   -688   
272    -624   
-128   -176   
96     112    
176    -48    
128    -96    
0      -48    
192    -1216  
-16    80     
-144   400    
432    -64    
-496   176    
496    -512   
-192   -112   
0      -848   
128    16     
288    32     
0      -80    
208    -3696  
-240   -96    
160    128    
16     -16    
80     16     
-448   -320   
496    208    
-688   528    
-208   -96    
-32    -16    
-656   -32    
112    -144   
160    -464   
-208   -112   
-112   -80    
144    -688   
112    -80    
0      -224   
176    320    
-112   -48    
-272   240    
384    -224   
-336   -272   
176    -256   
128    -128   
-208   32     
96     -416   
-1120  608    
1280   16     
-656   -16    
-176   -64    
736    -16    
-176   -1360  
-672   -240   
-64    16     
496    32     
-80    -16    
48     32     
-144   0      
-112   -208   
-336   -64    
272    -288   
-1152  -32    
0      176    
224    -32    
32     -192   
-112   -96    
288    -160   
720    -560   
-992   272    
848    -16    
-560   0      
-128   -96    
608    96     
-544   192    
-160   -160   
304    112    
96     -16    
80     -128   
-272   144    
-256   -208   
288    -208   
64     -400   
144    -48    
-224   96     
208    -16    
272    688    
-400   -80    
-416   32     
288    -112   
336    128    
-112   160    
-208   -144   
-544   -480   
400    -672   
16     -3040  
-1856  -832   
784    -480   
-144   800    
864    192    
-336   -160   
-160   64     
-496   -96    
0      -400   
576    160    
-112   -144   
-272   -112   
-528   0      
304    16     
-64    -80    
144    -144   
-80    288    
-192   -208   
160    -240   
192    -992   
32     384    
-32    272    
-192   224    
432    -624   
-160   16     
-496   -176   
-64    -624   
-288   -368   
320    64     
-432   832    
-128   144    
96     128    
384    -64    
-176   240    
-64    240    
-48    -208   
96     -80    
256    -608   
32     -128   
-64    592    
80     -112   
-144   -352   
176    624    
-48    -944   
-432   -288   
-640   128    
-208   80     
256    400    
-16    80     
-96    32     
-112   304    
-80    -496   
-992   624    
656    464    
-576   336    
176    -208   
-256   800    
-496   -112   
-528   -896   
96     624    
-16    0      
64     64     
-256   -16    
-16    -320   
-512   -368   
-400   256    
384    -192   
-176   -80    
160    112    
64     96     
80     48     
-160   32     
0      48     
32     -96    
-176   48     
48     32     
384    240    
-448   176    
144    -32    
160    -48    
-208   0      
-320   1072   
1056   -352   
-880   112    
272    -48    
-368   160    
16     48     
-160   32     
208    -352   
304    -32    
128    240    
-48    64     
48     -112   
-176   -416   
336    -32    
32     144    
-208   96     
32     -144   
-192   -112   
-80    32     
-64    32     
-272   512    
336    -80    
-704   -16    
-32    208    
176    -256   
-64    -208   
-80    -320   
64     208    
-48    336    
-80    128    
-48    -112   
352    -320   
-64    -32    
-208   -32    
112    96     
16     -416   
16     -32    
-80    -560   
160    -480   
0      -256   
-96    80     
-16    0      
528    -80    
-224   -64    
-160   -16    
80     496    
-336   -48    
272    464    
192    32     
1008   1840   
-816   672    
-1040  208    
768    32     
-112   624    
-1280  -512   
32     32     
416    -176   
48     -880   
-128   288    
64     736    
-288   816    
368    112    
96     48     
-64    -112   
-496   -224   
-64    -352   
352    -288   
-688   320    
-336   416    
304    256    
-928   -528   
1584   -400   
-528   -944   
272    2064   
1248   560    
-672   64     
1008   464    
-944   560    
-96    -208   
432    64     
-112   -48    
-80    208    
-320   -496   
192    -192   
384    160    
-304   32     
-80    32     
96     96     
0      112    
176    -304   
-144   64     
-144   -304   
864    112    
-816   176    
208    -80    
336    112    
-624   560    
-752   -144   
-80    0      
560    352    
-640   208    
-64    -80    
-176   -32    
-48    -128   
304    -16    
208    -432   
-48    752    
-16    368    
-496   16     
48     32     
-128   -112   
192    96     
16     48     
16     -144   
32     48     
224    96     
64     112    
-208   48     
304    -144   
352    -1712  
-2368  -784   
1280   384    
-336   -160   
400    -16    
240    176    
-800   -176   
304    576    
0      -144   
400    -80    
16     -160   
176    160    
-80    -16    
-144   208    
144    -80    
80     384    
-240   0      
96     160    
256    288    
128    -336   
-448   304    
704    -64    
-496   320    
-624   -80    
192    160    
720    16     
-656   352    
304    96     
-128   192    
256    -96    
80     144    
-208   -80    
96     96     
80     -128   
-112   304    
336    32     
-352   128    
768    -32    
-512   144    
336    176    
-128   64     
-16    64     
528    80     
-240   80     
192    400    
-352   0      
192    48     
128    -64    
-448   80     
288    144    
272    80     
-128   -208   
320    -448   
-512   304    
1152   112    
-512   176    
-336   -272   
80     -48    
240    112    
192    64     
-16    -80    
-64    64     
0      160    
176    -16    
-112   -96    
0      48     
48     -80    
176    -2048  
-224   -784   
-384   208    
416    208    
-400   16     
432    0      
32     -16    
-32    224    
-240   -80    
208    480    
224    592    
-448   368    
144    -192   
160    32     
240    1904   
2256   -800   
-1728  352    
448    0      
352    112    
-256   -816   
-112   -304   
432    1056   
-896   400    
496    -336   
432    96     
-416   -160   
-80    0      
32     480    
432    -192   
-128   -48    
80     -176   
-256   224    
112    -1168  
256    32     
-128   -1232  
-640   688    
480    32     
-400   80     
512    -496   
-32    176    
-528   -416   
176    -64    
272    432    
-144   -32    
64     112    
80     -608   
-336   128    
400    -1040  
-160   112    
-80    -144   
256    112    
-256   -1200  
160    -112   
-128   -96    
0      96     
-80    160    
336    16     
-112   128    
96     -416   
-304   80     
448    -528   
-48    240    
-176   144    
-256   -304   
2528   -304   
-2848  688    
96     -96    
1248   160    
-688   -80    
-304   240    
976    -400   
-368   -576   
-224   -224   
16     144    
96     240    
112    -80    
112    128    
-160   -128   
608    224    
-432   -576   
240    16     
-128   32     
592    544    
-16    80     
256    656    
16     -304   
-1408  -288   
1664   -496   
176    -256   
-352   288    
-80    -192   
288    -96    
32     -128   
-32    -112   
-352   -160   
-48    320    
688    16     
-144   32     
304    -112   
-544   160    
304    160    
112    -624   
-208   176    
272    48     
-128   272    
192    80     
-464   0      
-144   -448   
-144   464    
496    -864   
912    256    
-432   192    
512    320    
-416   160    
-160   16     
144    -96    
-48    240    
-16    480    
224    224    
-608   224    
-64    -752   
816    -48    
-192   176    
-464   -176   
560    -96    
-48    -1216  
-176   -368   
336    -192   
0      -48    
480    -48    
-48    144    
304    -560   
-192   -704   
-16    -48    
-1264  -1712  
-368   48     
576    -448   
-624   -832   
1008   0      
-176   496    
-1088  -2448  
192    -176   
480    720    
-272   96     
128    160    
-368   -512   
304    304    
32     -272   
96     -240   
192    -960   
-480   -96    
192    -1760  
240    272    
-96    64     
0      -64    
48     48     
48     -240   
-48    256    
368    -128   
-96    896    
288    240    
-720   384    
192    -560   
144    304    
-80    -240   
-256   -128   
112    -192   
112    688    
608    976    
-288   144    
-32    -144   
-80    -288   
80     -160   
128    704    
-304   -176   
-128   80     
-224   -48    
272    352    
-224   176    
160    -640   
-160   -656   
-144   -736   
288    576    
-128   -1776  
-368   -352   
880    -592   
-688   656    
-144   -192   
-400   336    
48     -784   
-224   -32    
-544   1472   
288    544    
-800   -848   
160    -48    
-32    400    
160    -624   
224    -400   
176    -928   
-256   208    
-176   112    
96     272    
-32    64     
144    16     
0      -64    
-48    -80    
-336   -16    
224    -224   
-112   -48    
-256   144    
272    432    
-160   176    
-176   192    
208    -368   
-128   176    
-144   960    
720    16     
-592   -16    
160    -176   
0      -176   
-16    240    
-96    32     
240    32     
-128   64     
256    -288   
-464   -400   
32     -352   
-160   224    
176    -64    
-144   96     
96     -432   
272    -624   
160    -48    
-16    0      
64     672    
-176   224    
-80    -32    
720    0      
-720   64     
-96    -64    
-144   -320   
176    -80    
384    784    
224    -288   
-528   -224   
144    -32    
288    400    
240    -352   
80     -144   
-576   -224   
96     496    
272    -192   
352    288    
-400   -304   
-128   144    
-208   -288   
288    112    
320    -432   
-272   -624   
-144   -16    
96     -16    
352    -48    
-288   -192   
336    -720   
-1136  -1488  
-96    128    
448    -320   
-848   240    
848    224    
-528   288    
512    272    
-672   240    
-48    416    
-112   -176   
32     192    
-272   32     
-112   0      
64     336    
-304   160    
-144   0      
-368   176    
128    368    
16     144    
-64    -96    
-128   -16    
-320   -896   
-480   -336   
608    -272   
32     -160   
-560   208    
464    -112   
-176   -528   
-944   192    
528    16     
-96    -48    
-496   144    
64     112    
-208   -112   
256    192    
32     -176   
-48    64     
-16    96     
-64    -32    
416    -48    
-96    48     
112    576    
-928   240    
256    -208   
-112   688    
240    464    
-128   1120   
-1056  608    
-976   -816   
816    -512   
416    16     
-608   288    
32     144    
384    96     
48     -224   
256    -192   
-896   16     
48     -128   
1088   -48    
-400   352    
-720   192    
-112   48     
464    -240   
-656   -64    
-224   -32    
272    480    
48     64     
-224   -144   
352    176    
-928   -720   
-1168  1536   
864    352    
-816   496    
176    96     
560    48     
-128   208    
-800   128    
496    0      
-32    -208   
-384   -48    
32     0      
48     -16    
96     -176   
-16    -80    
-144   240    
-176   -32    
192    48     
240    16     
-128   -128   
-1136  -96    
1088   -64    
-448   48     
64     -112   
0      96     
128    240    
-672   -272   
48     -80    
16     64     
-48    80     
-16    208    
-304   32     
416    128    
-496   -128   
96     -48    
16     272    
480    96     
-784   -48    
640    560    
-560   48     
48     336    
-64    -192   
-544   32     
240    176    
64     176    
32     16     
32     256    
416    656    
-112   224    
-368   -64    
256    -176   
-144   -80    
-432   -1248  
-576   -96    
192    32     
-112   96     
256    -224   
64     -480   
-288   0      
224    -192   
128    48     
-176   96     
-128   112    
208    112    
176    112    
-208   80     
-224   -160   
32     -32    
464    368    
-480   96     
224    -96    
48     -384   
-240   240    
160    400    
176    32     
-128   80     
-240   32     
416    176    
-32    256    
48     208    
-144   48     
592    1680   
-1168  -2224  
-1168  880    
2112   -336   
-912   112    
-320   240    
192    160    
240    -384   
-16    -1120  
-192   528    
96     416    
-96    -128   
144    256    
-160   0      
240    320    
16     496    
-32    -208   
-80    224    
240    48     
-192   464    
-384   -224   
1056   336    
-448   112    
-400   -480   
416    -624   
-352   160    
464    464    
-224   960    
64     32     
-336   96     
-32    16     
240    -160   
32     416    
-496   -16    
16     48     
368    32     
48     128    
-128   144    
80     288    
-96    288    
16     16     
144    -32    
0      160    
-112   128    
-304   48     
480    96     
-192   144    
80     128    
-16    256    
304    -160   
-128   -1008  
-1808  640    
1920   688    
-912   -192   
-272   -112   
752    -208   
-368   144    
-256   416    
-240   48     
480    208    
128    80     
-352   32     
64     -16    
208    432    
-240   64     
64     496    
224    -32    
-128   144    
-96    -32    
-16    96     
-144   -496   
1072   896    
-768   -128   
288    -176   
-80    -16    
-432   176    
-64    -288   
-112   -624   
208    -96    
-96    208    
-96    144    
32     48     
288    96     
-64    224    
-432   128    
16     80     
480    -48    
144    160    
112    272    
-192   -208   
0      32     
64     -240   
208    -320   
336    16     
-208   -480   
544    -224   
496    2016   
-880   1904   
-384   1408   
432    320    
-176   240    
288    -48    
-128   352    
-176   32     
208    -592   
144    -320   
-656   528    
-80    272    
-464   -96    
224    -160   
48     272    
-32    -976   
-224   -96    
-96    -48    
128    32     
416    944    
400    432    
-176   -464   
32     256    
-96    64     
320    800    
864    -288   
-768   -1040  
1872   -80    
-576   -32    
-528   1216   
560    -1584  
304    624    
-304   128    
-272   -112   
144    -192   
176    592    
144    -272   
160    -32    
-272   544    
0      -288   
-96    -96    
224    272    
-336   448    
400    464    
-80    816    
16     -848   
288    16     
-240   176    
64     80     
144    912    
-336   240    
-224   160    
656    704    
-80    -160   
128    416    
-320   -144   
144    -240   
224    -192   
256    -96    
32     240    
-256   -64    
80     -16    
256    -848   
-128   192    
-144   208    
-32    -272   
-16    32     
160    -16    
-48    -704   
-160   -480   
176    400    
272    -1376  
-48    432    
-160   -176   
-80    592    
-48    -192   
1008   176    
-352   -128   
16     480    
208    160    
416    48     
-160   96     
80     240    
-112   496    
-16    16     
272    176    
128    128    
-336   64     
32     16     
80     -240   
-368   -688   
384    544    
-336   -32    
-320   400    
112    256    
-64    -1216  
144    -96    
-48    -864   
464    -32    
-256   832    
320    -912   
192    736    
80     192    
0      -112   
-144   176    
688    752    
656    208    
-816   -1008  
96     -912   
-256   -576   
272    -1856  
112    528    
-704   1072   
32     592    
-112   -400   
224    -784   
96     432    
80     -400   
-272   144    
272    416    
-32    272    
16     -816   
-32    -80    
-80    -384   
-80    64     
592    -16    
-64    -592   
-240   -944   
0      80     
256    -576   
48     -112   
64     -336   
-16    176    
64     -368   
32     -2352  
272    16     
192    -336   
-304   -64    
64     208    
176    -80    
240    608    
-240   288    
-96    112    
176    -16    
-1216  -160   
144    32     
208    160    
-112   224    
176    96     
-224   -1088  
-304   -160   
336    -16    
-144   208    
-448   -176   
736    -1232  
-1776  -720   
1728   -272   
-992   32     
-624   -160   
1312   560    
-448   48     
-144   -144   
224    -320   
-128   -176   
256    -240   
-128   16     
48     -464   
-160   128    
480    -32    
-192   16     
-32    16     
176    -176   
112    224    
-208   -112   
-144   160    
448    1168   
-640   -640   
-1264  48     
1680   -112   
-1024  16     
352    288    
-16    -944   
-112   528    
992    -160   
-496   96     
192    16     
64     128    
-64    -32    
-192   -320   
-48    -208   
96     -352   
-448   -224   
0      544    
96     144    
-272   -272   
352    208    
-112   -1600  
-544   656    
480    -240   
-256   -416   
160    -112   
112    -432   
-288   -176   
-512   304    
336    224    
352    16     
-336   -80    
256    -64    
80     -352   
-192   -448   
-224   -320   
48     -592   
400    -272   
64     16     
-560   0      
128    48     
464    -208   
-320   288    
-240   64     
-528   448    
1024   96     
112    16     
-432   -240   
1328   1440   
-784   -1536  
-2544  -1008  
2240   32     
1088   480    
-1120  -304   
-832   0      
480    -16    
256    224    
-32    -240   
128    80     
-80    128    
-96    -64    
32     -128   
256    -192   
-160   80     
80     -16    
-80    176    
-560   -320   
-352   -256   
720    608    
-320   -208   
-192   144    
32     -144   
-528   160    
768    -32    
-880   -224   
528    32     
96     -368   
-352   -16    
112    32     
-64    -48    
144    16     
80     -176   
-336   -144   
-192   128    
112    -64    
-304   176    
208    0      
-112   160    
-272   16     
-96    -16    
272    256    
-32    96     
64     -208   
-128   352    
0      16     
-16    320    
112    -80    
-480   32     
272    208    
-464   -64    
464    848    
-736   208    
-80    -320   
64     -304   
-352   80     
368    -80    
-192   -48    
96     96     
352    288    
-96    -256   
-160   112    
128    80     
48     144    
-128   160    
16     144    
80     112    
-32    32     
-80    -32    
-112   -272   
32     64     
-816   -64    
144    416    
144    -64    
-80    272    
-352   176    
96     64     
-160   -480   
112    -368   
-48    -256   
-416   -240   
1840   2080   
448    160    
-1568  192    
576    -1168  
-528   48     
-432   -112   
32     -224   
32     -112   
-480   -80    
208    -256   
320    -288   
-112   -160   
-304   320    
64     -48    
160    0      
96     608    
-304   368    
-112   -16    
0      -192   
64     -64    
-576   -944   
80     -944   
-320   96     
112    576    
-160   -528   
0      -688   
-96    624    
96     288    
64     -320   
-32    48     
16     224    
32     224    
-208   -32    
64     -32    
256    -240   
-96    384    
-272   368    
48     64     
-64    0      
-240   -240   
240    272    
208    64     
-272   -32    
32     32     
-144   -160   
128    112    
176    384    
-64    -144   
-208   96     
-144   -1200  
1728   -720   
-1456  128    
512    208    
592    720    
-784   400    
1312   976    
32     1520   
-624   -1072  
256    -976   
-80    -64    
96     224    
-272   80     
288    464    
-256   48     
-256   80     
288    -96    
144    272    
-464   -464   
288    -448   
-32    144    
-352   -464   
-448   496    
1200   -544   
-608   -1008  
-16    704    
656    752    
-352   -176   
-64    -1136  
-160   -1152  
144    -224   
-176   512    
240    144    
0      176    
-144   -304   
80     -336   
112    -64    
-336   -720   
-48    -1184  
96     -544   
80     608    
-144   464    
-32    352    
16     608    
128    752    
16     1712   
-144   912    
256    1040   
48     992    
-16    800    
704    -608   
-544   -336   
96     704    
384    752    
-224   -400   
-464   304    
-32    96     
32     1024   
912    592    
-464   336    
592    16     
-368   464    
-176   144    
-32    112    
384    -48    
-16    496    
544    368    
-512   -16    
224    368    
384    608    
48     -96    
-1392  -880   
128    912    
-48    320    
-576   -352   
848    320    
-512   -880   
208    1248   
-80    2016   
192    96     
736    -352   
-144   624    
-176   80     
-160   624    
208    -208   
352    160    
32     -160   
-16    -160   
64     320    
-32    384    
16     272    
112    16     
96     192    
112    -128   
-560   464    
528    608    
16     576    
-64    656    
16     304    
-384   -896   
176    -704   
96     192    
-288   224    
192    240    
32     -288   
-304   176    
320    144    
160    -32    
-176   16     
112    -544   
128    -576   
-176   -32    
16     368    
192    256    
-128   176    
-112   784    
304    -240   
-160   -464   
-352   -704   
112    64     
192    464    
-368   -112   
656    -608   
0      336    
-624   64     
416    32     
192    256    
-784   -112   
-64    -944   
256    -768   
-96    -16    
16     576    
80     480    
-64    528    
48     112    
288    -400   
-368   -160   
144    32     
80     192    
-432   48     
320    -160   
-240   -192   
-80    0      
192    96     
16     32     
192    304    
-208   256    
64     -16    
0      -288   
-112   -320   
32     -336   
1200   1152   
-1888  1280   
1504   560    
-944   -832   
16     -240   
128    -384   
-192   288    
16     48     
256    496    
336    304    
-336   288    
-16    96     
64     144    
-48    -112   
-64    -208   
144    -464   
-144   -624   
288    80     
288    -96    
0      176    
-352   -144   
-112   -832   
80     384    
832    144    
-832   304    
432    80     
-384   384    
176    80     
160    0      
-32    16     
48     -112   
-32    -240   
-16    0      
112    -16    
-192   64     
-48    144    
304    -32    
-144   160    
176    -336   
-272   256    
368    80     
-432   112    
336    -48    
-208   -32    
288    -560   
336    -48    
-512   -432   
368    224    
-16    -32    
-560   928    
-1776  -1376  
3520   592    
1232   -432   
-2272  208    
240    608    
1824   288    
-1184  -768   
240    -96    
192    -352   
-336   208    
144    -16    
16     -64    
208    -176   
176    -176   
-112   -176   
192    -528   
240    192    
-224   160    
-128   112    
16     -64    
64     144    
-672   -128   
944    112    
1072   -64    
-1104  -96    
-624   320    
1200   -48    
-336   144    
-128   224    
96     -192   
32     -80    
-16    80     
-64    96     
400    -176   
-816   0      
64     -192   
96     -848   
-384   144    
384    -640   
-336   -224   
112    496    
240    160    
-192   -224   
-288   320    
1312   -160   
-288   672    
368    64     
-272   0      
112    -464   
480    0      
256    -80    
-32    128    
-304   256    
352    -1360  
288    208    
-48    -1152  
48     -288   
736    1056   
-272   224    
-144   -656   
448    64     
112    -16    
-48    -96    
-192   0      
-128   -400   
512    16     
96     -224   
48     -112   
224    -336   
32     -528   
-1664  2464   
2128   224    
-1376  -1504  
-224   -496   
224    -624   
144    448    
480    -240   
-368   560    
-432   96     
64     208    
336    -176   
-112   -96    
-1248  -64    
-368   128    
496    0      
-288   80     
160    16     
-176   -544   
288    336    
-64    -352   
-160   592    
608    -256   
-656   48     
528    32     
-64    -128   
-112   160    
160    -128   
-240   -16    
560    -464   
-352   -160   
112    -320   
-16    16     
192    -656   
96     -16    
-96    -1472  
144    -48    
112    -176   
288    -368   
64     -160   
32     32     
-48    0      
-160   160    
-144   -48    
0      -336   
592    -352   
0      -240   
-96    -64    
-112   -576   
160    -16    
-16    -592   
-128   64     
32     -1008  
-256   48     
336    880    
-704   704    
608    0      
96     -224   
-80    528    
224    528    
-192   -16    
144    112    
32     96     
-64    -176   
-80    -160   
-64    -320   
144    288    
304    -96    
64     48     
-64    240    
-64    256    
80     -352   
-176   -880   
320    -560   
-448   0      
-288   192    
384    -256   
144    240    
-16    224    
-432   112    
464    -896   
-160   -720   
464    -1664  
-816   720    
624    -512   
16     -832   
-592   32     
352    -336   
-352   -1168  
448    128    
-400   112    
384    -80    
128    176    
-48    -336   
-176   96     
112    -176   
16     64     
-240   -480   
160    128    
16     288    
-16    -288   
-288   -400   
848    -576   
-112   528    
240    192    
-192   -400   
-304   -192   
304    -496   
80     544    
-144   -80    
-560   64     
-192   0      
80     -64    
-1200  496    
-32    -128   
-80    320    
176    -128   
384    96     
-576   -336   
-240   -560   
128    368    
64     80     
48     -240   
-240   -144   
-80    -16    
272    -80    
-96    224    
-64    96     
-208   256    
0      48     
-400   -144   
1520   1024   
-2304  320    
-1456  -688   
2432   560    
-736   1104   
-752   112    
544    880    
-112   144    
-48    -128   
208    224    
112    96     
-304   -192   
176    96     
16     48     
-400   112    
-128   80     
48     -16    
-64    112    
64     0      
240    80     
-512   -720   
1408   528    
-976   288    
80     -1008  
48     -608   
-464   -160   
576    528    
-144   560    
-64    -96    
144    -1168  
-224   -400   
160    832    
96     416    
-160   -512   
192    976    
464    288    
-384   416    
304    160    
-528   432    
192    432    
304    288    
-256   0      
368    256    
208    832    
-384   496    
-80    192    
144    -176   
544    2240   
768    1440   
-400   80     
16     -704   
288    -528   
-256   -128   
-32    -528   
64     864    
608    -240   
48     -672   
656    -416   
-352   -16    
464    400    
208    208    
-384   32     
-48    -448   
-272   -176   
288    224    
-624   448    
-192   80     
-64    752    
208    368    
-192   176    
1232   2112   
-1744  672    
736    -96    
624    -1024  
-1040  -144   
-192   384    
-160   304    
640    1552   
80     1088   
-624   -736   
-272   -768   
512    368    
-32    288    
-208   816    
-400   112    
-272   320    
528    192    
-208   144    
-224   -256   
-800   -1168  
416    -672   
224    -336   
-480   144    
-128   32     
80     832    
-640   -320   
368    -656   
-80    -336   
32     -16    
-48    64     
32     256    
240    352    
-128   -96    
128    80     
96     688    
64     592    
-96    -192   
-128   352    
64     480    
48     608    
-192   128    
112    64     
-80    -160   
304    -144   
-176   -288   
160    -144   
-208   -16    
176    -560   
-144   -224   
-176   96     
176    176    
-432   -928   
-176   -48    
832    128    
-464   304    
192    160    
-32    -368   
-448   -352   
128    -208   
-480   64     
432    -16    
32     80     
-96    96     
-128   -240   
96     -80    
-96    64     
0      16     
-80    -96    
0      -864   
-224   176    
-80    -160   
-288   -336   
176    -272   
80     -32    
-64    304    
272    496    
-592   96     
-80    -96    
288    -320   
-32    16     
-368   -208   
192    -2624  
-1280  1040   
1488   -336   
-768   160    
-96    80     
-16    224    
656    304    
-96    -144   
-704   336    
320    -32    
64     128    
128    -32    
-48    48     
16     208    
128    624    
-720   -48    
368    96     
16     -272   
-368   -16    
80     240    
-96    1024   
1248   -416   
-944   32     
208    -16    
448    48     
-272   560    
304    -16    
-160   224    
-240   -48    
32     16     
352    112    
-160   224    
-64    64     
32     160    
-64    -32    
272    112    
144    0      
32     272    
80     48     
-288   144    
400    112    
0      176    
208    112    
-368   -176   
416    176    
-304   -48    
16     304    
432    176    
-336   -32    
-80    -96    
-352   608    
176    352    
224    208    
-320   -16    
-384   160    
1200   160    
-304   208    
-160   112    
80     -16    
192    256    
-272   -64    
336    -144   
144    80     
-608   -432   
336    224    
224    128    
-272   0      
64     -96    
0      -48    
-160   32     
512    864    
-1328  -544   
-272   96     
1184   304    
-2208  80     
880    0      
96     -576   
-624   16     
576    -224   
-112   -16    
176    112    
96     224    
-128   80     
0      160    
-400   -32    
240    96     
16     -32    
-16    -96    
64     -272   
208    64     
-16    16     
544    416    
816    -32    
-992   -128   
944    -80    
-256   -656   
-448   672    
-208   672    
576    -288   
-112   -480   
576    112    
-240   320    
112    32     
352    384    
112    -176   
-464   448    
512    176    
-448   192    
352    64     
64     -48    
-144   -784   
304    128    
-176   -176   
80     128    
128    288    
624    -48    
-240   0      
272    144    
-576   -912   
672    -4192  
-2640  -2144  
2064   1168   
64     288    
-272   -384   
16     0      
-224   -48    
368    368    
-240   -464   
576    96     
32     -64    
-192   144    
288    0      
-176   304    
240    -80    
96     288    
96     96     
-288   -96    
-144   -352   
464    -1168  
-80    -1216  
0      -496   
-16    464    
-560   -144   
448    368    
112    -112   
-96    144    
160    96     
-96    320    
176    576    
192    512    
-32    400    
-64    -304   
48     224    
304    160    
-464   -160   
560    -992   
-16    -432   
-112   -48    
64     224    
-80    32     
544    832    
-384   704    
64     -400   
64     -304   
-336   -672   
128    -624   
128    -464   
-128   160    
256    -384   
-272   -496   
576    112    
-800   560    
560    224    
-480   336    
176    -48    
16     -1504  
16     -1168  
-368   -432   
208    -1040  
-144   -256   
80     -880   
192    208    
-96    160    
-144   -256   
112    16     
112    288    
64     -768   
32     -48    
-80    -96    
128    448    
-160   -448   
144    -464   
-624   -144   
352    -432   
-96    192    
304    -272   
-304   -48    
320    -1232  
144    -160   
-352   48     
720    704    
-880   992    
528    -112   
160    -544   
160    144    
32     -16    
-416   64     
32     -208   
-288   -320   
32     -352   
80     144    
-32    16     
16     80     
-128   -80    
304    -784   
-64    -112   
-192   -448   
336    16     
272    -80    
-48    160    
-576   -224   
160    320    
-160   80     
-256   192    
96     160    
-64    16     
-64    32     
-176   -96    
320    -80    
112    -608   
112    0      
-304   -48    
-80    -32    
272    -256   
16     416    
80     -160   
-64    -64    
-480   -128   
64     112    
-32    -16    
-256   -288   
-160   -96    
32     -448   
160    -112   
-128   -832   
16     272    
-128   -880   
0      -80    
96     16     
-160   -160   
448    352    
1824   176    
-1184  -128   
512    -352   
656    -432   
-192   -176   
1104   -1648  
16     -96    
-32    480    
-112   768    
320    -32    
336    -1248  
96     288    
-224   -432   
48     -64    
160    80     
112    80     
320    -304   
-176   288    
-240   16     
272    -624   
-2032  976    
1584   -544   
-224   -832   
128    -912   
432    -16    
-992   -1840  
-336   -1904  
176    -1392  
-32    800    
48     144    
-192   112    
-176   -528   
96     -256   
-160   -304   
192    48     
32     672    
528    1088   
160    704    
-240   -256   
48     144    
-128   -256   
256    -16    
-576   -96    
528    816    
-368   576    
656    1904   
-1408  1120   
32     816    
496    -624   
-400   80     
336    -48    
-352   -16    
0      -144   
608    384    
400    -288   
-96    -320   
-336   448    
-272   -272   
656    112    
48     -48    
-208   -272   
144    48     
0      160    
624    896    
-864   400    
-304   -96    
576    144    
-128   -80    
-768   -1696  
1088   -1840  
320    320    
-1536  -352   
-496   -1584  
-336   -1040  
608    -448   
48     576    
-496   304    
448    400    
-80    96     
-32    16     
-240   -192   
-320   352    
352    -16    
64     0      
-160   32     
-64    -208   
-416   -384   
400    -624   
-192   -1488  
-224   -784   
208    48     
176    96     
-208   -48    
32     48     
64     -240   
-96    -304   
-32    -176   
192    -48    
-368   -48    
144    -64    
-48    192    
0      240    
144    320    
-272   -96    
32     224    
96     608    
-176   192    
-304   96     
192    0      
-144   128    
352    448    
-512   -64    
-240   80     
368    -176   
-304   -224   
-176   -144   
208    -192   
-128   0      
144    -80    
-240   -272   
448    -432   
112    256    
-528   -96    
272    144    
-368   -144   
-256   -80    
208    -80    
-96    -32    
48     -112   
-192   240    
112    -16    
192    160    
-240   160    
-224   -256   
464    -384   
-256   320    
-16    -352   
432    -464   
-464   416    
-224   -304   
224    272    
-64    288    
64     304    
-80    -80    
-16    -464   
-112   304    
64     48     
48     32     
32     96     
-160   -2560  
-1536  1456   
1632   16     
-832   64     
432    -32    
48     -320   
-288   -144   
-704   32     
608    336    
160    64     
-352   -32    
-368   208    
80     -32    
400    -48    
-448   352    
80     -368   
16     112    
-272   208    
0      -64    
80     48     
560    1488   
-1568  192    
-896   -320   
1136   -1424  
-560   -32    
208    128    
-512   432    
192    -128   
-64    96     
528    48     
-608   224    
-256   -192   
-160   240    
640    -160   
-144   48     
-320   48     
96     128    
-160   240    
-16    -48    
-224   176    
64     48     
-16    96     
80     48     
-16    112    
-48    -64    
-560   176    
512    -32    
-48    176    
-112   -64    
-352   -976   
2336   2400   
-144   -1136  
-1712  96     
1456   -192   
-464   -48    
-320   464    
336    320    
464    704    
128    -176   
-544   224    
256    -16    
160    112    
-16    -128   
96     32     
64     0      
-320   128    
336    48     
-112   -80    
48     -80    
32     144    
32     272    
224    448    
1392   -16    
-608   1296   
-352   192    
48     224    
-288   144    
64     -64    
208    304    
-352   -32    
-48    112    
176    48     
0      64     
-80    0      
80     0      
-192   128    
192    64     
0      48     
-224   64     
-48    128    
-80    80     
432    416    
-1072  80     
144    48     
80     80     
-16    32     
352    -80    
-368   208    
448    400    
608    -48    
-320   160    
96     240    
-704   240    
-80    -448   
704    -32    
-384   208    
192    -48    
64     -16    
-176   160    
224    80     
0      128    
16     32     
48     112    
-16    144    
48     400    
-352   64     
-32    80     
272    80     
-224   48     
80     880    
1664   480    
-32    -384   
-1904  -464   
288    16     
1392   304    
-848   1008   
16     -128   
96     512    
64     -80    
-160   48     
224    -144   
-496   -96    
128    112    
-80    384    
352    176    
-560   368    
240    -112   
-192   -144   
-64    -1616  
-336   -1232  
368    320    
-96    592    
192    176    
96     -176   
-176   -32    
112    192    
-224   144    
432    544    
16     560    
160    -64    
144    -464   
-288   -400   
128    560    
-48    32     
304    -16    
-192   -224   
48     -1248  
224    -112   
-32    -48    
32     176    
176    656    
-48    800    
192    336    
112    1184   
400    1088   
-352   512    
528    768    
80     672    
-112   -256   
112    -32    
-448   160    
496    464    
688    192    
-416   848    
560    304    
-480   464    
512    704    
-608   -272   
352    -1008  
-80    288    
80     -416   
32     320    
-48    -176   
32     96     
208    -272   
-48    144    
-112   0      
112    192    
-80    -1328  
192    112    
-96    48     
-80    80     
80     64     
112    112    
112    16     
32     -16    
-544   16     
400    96     
112    80     
-48    -160   
-192   144    
-176   624    
1088   -256   
-816   -1648  
-80    112    
0      -144   
-96    80     
-128   416    
320    -176   
-416   -240   
176    192    
-112   112    
192    -48    
208    -48    
-464   144    
32     48     
304    -272   
160    -16    
-48    -272   
-128   176    
576    688    
-560   400    
256    -320   
848    -32    
-736   320    
64     -96    
-208   -448   
304    -496   
-16    464    
176    32     
208    224    
-48    -304   
-288   112    
48     -288   
432    -80    
48     64     
-224   128    
-96    96     
288    -112   
80     48     
-96    272    
-32    96     
128    -896   
224    -48    
192    -560   
-176   -64    
-496   16     
32     288    
240    -128   
288    32     
-1632  -1296  
880    352    
336    -304   
-992   224    
672    -192   
-432   -1888  
-592   -1824  
416    1568   
-544   -976   
-112   -912   
304    -32    
-256   32     
-144   128    
288    160    
48     -144   
-64    64     
-96    -640   
192    -144   
16     -1312  
-96    -16    
640    1024   
-1776  -1488  
-416   512    
1120   -1808  
-480   -544   
-272   544    
608    752    
-144   384    
-432   -96    
176    -1632  
-112   -80    
-64    -304   
-384   352    
576    -896   
-48    -400   
-1024  -16    
528    -96    
-288   288    
800    80     
32     -272   
-304   -400   
-48    -464   
-240   368    
-720   -2352  
-32    -1104  
1072   464    
-688   32     
-208   736    
976    -784   
-496   -96    
-160   256    
48     112    
64     -320   
224    -496   
-144   96     
-1072  -192   
480    144    
-496   -1856  
-80    -64    
128    656    
592    -272   
-336   64     
-32    -128   
144    192    
368    400    
-576   -464   
-528   -48    
848    -64    
464    752    
-688   688    
-1504  1568   
992    352    
-800   -880   
-800   -240   
1552   144    
-128   -16    
-1216  288    
592    -384   
-240   176    
352    -288   
-400   48     
-144   -320   
-272   160    
0      -112   
112    96     
160    -64    
-304   -48    
448    -304   
-608   -384   
-48    -224   
160    80     
-48    80     
544    -208   
-64    -48    
-320   -224   
192    112    
80     -128   
-16    -16    
320    96     
-320   -80    
-64    48     
528    64     
-624   -192   
304    96     
208    -1216  
96     -64    
-432   -176   
368    -272   
-224   96     
80     -48    
-64    -16    
368    -64    
-368   -176   
208    -224   
-400   -32    
-32    -336   
-272   -112   
32     -192   
96     96     
-96    -912   
0      96     
-400   -992   
-160   32     
352    496    
-80    32     
-64    96     
288    -80    
-176   80     
-32    64     
-480   240    
512    -48    
-288   144    
16     -368   
272    16     
-176   -240   
32     96     
-144   -176   
48     -80    
-464   224    
464    -144   
-384   192    
128    -64    
-48    16     
144    -176   
16     48     
112    -64    
48     -320   
80     -48    
0      208    
-16    -240   
752    1648   
-1312  -1776  
-800   368    
1632   -384   
-400   -400   
-640   208    
128    -96    
240    272    
-48    -752   
-368   96     
-832   240    
-176   -240   
-304   80     
224    272    
-512   -112   
256    32     
-272   208    
-288   -464   
-16    -144   
-96    320    
-368   -384   
320    -1184  
-176   336    
768    -208   
-688   48     
-288   96     
80     -480   
-48    208    
560    240    
-304   64     
-128   -64    
-256   128    
288    -416   
-16    160    
-432   -144   
-32    16     
176    32     
-48    0      
-64    128    
224    -48    
-272   48     
-96    96     
160    32     
368    -64    
-96    -32    
-640   -224   
240    304    
-64    64     
256    64     
-512   -96    
-512   2512   
1280   768    
-832   448    
-720   -736   
992    448    
-80    -208   
-336   368    
288    256    
448    512    
-512   272    
96     -48    
368    96     
32     16     
-32    256    
-624   80     
224    288    
-96    -112   
224    -176   
-144   -176   
208    112    
96     80     
-368   336    
1808   -592   
-944   576    
-32    -128   
-288   272    
224    48     
176    -272   
-96    240    
-128   -16    
144    112    
128    0      
-144   48     
-672   -112   
-256   240    
736    -176   
-32    176    
-160   208    
-240   -304   
288    -240   
80     -160   
-144   80     
400    128    
48     128    
-192   -496   
-544   432    
80     -16    
-48    -64    
16     -112   
240    224    
-112   -144   
-464   -896   
-240   256    
720    208    
-736   -48    
528    224    
208    208    
-272   -176   
80     96     
96     32     
144    128    
-112   -64    
-80    112    
-32    208    
-80    64     
-432   368    
544    -112   
-176   96     
-640   -416   
880    -224   
16     -1888  
-1984  -1136  
1248   64     
592    352    
-496   112    
256    560    
-256   -656   
-32    96     
-304   16     
688    576    
-432   -16    
-256   -128   
144    -112   
128    288    
0      -336   
-272   -176   
-144   224    
-272   -32    
0      -352   
96     208    
-32    528    
-112   16     
-224   -384   
-112   -896   
-48    -144   
-176   176    
-48    -288   
416    -576   
288    1040   
-64    512    
-208   352    
112    80     
144    -304   
144    304    
-544   -448   
16     -176   
-64    0      
16     -704   
-112   -480   
64     720    
32     -48    
-192   -256   
80     -96    
48     -16    
304    224    
-816   -784   
240    -1200  
32     432    
-256   160    
-64    400    
144    -128   
112    48     
-544   496    
704    560    
-224   880    
224    336    
64     512    
-256   -688   
-720   -1296  
768    704    
112    656    
80     -112   
-192   80     
-144   192    
176    -64    
224    96     
-528   -144   
368    -448   
176    144    
-16    32     
-48    96     
-128   112    
-32    144    
32     64     
128    80     
-96    384    
464    128    
-544   48     
96     48     
272    64     
-16    0      
560    256    
-1216  544    
528    -16    
-64    240    
96     144    
-240   128    
576    48     
-816   480    
192    112    
224    -240   
-144   144    
-16    160    
64     32     
-128   256    
144    96     
-176   -112   
0      0      
-64    64     
32     0      
32     160    
-240   1232   
880    -304   
-1040  -48    
240    -96    
-64    336    
256    496    
-192   64     
-192   592    
-64    144    
-144   96     
16     -336   
96     -288   
208    112    
128    128    
-352   416    
-16    464    
560    -256   
-512   -832   
-224   -256   
192    240    
336    464    
144    48     
-80    -240   
-496   -288   
224    16     
496    240    
-272   32     
-272   256    
192    -672   
752    1328   
384    736    
-1152  976    
1056   304    
544    -48    
-608   -128   
608    -288   
368    -752   
-464   -272   
240    -32    
320    128    
-96    64     
48     -448   
-16    176    
0      -624   
-64    128    
96     96     
224    -352   
-208   -256   
144    -272   
-144   160    
-464   -912   
688    -496   
272    624    
-576   1168   
-128   768    
288    144    
96     -688   
-224   32     
-96    -192   
736    -160   
-432   -400   
208    0      
160    96     
-32    352    
-144   -96    
-48    96     
288    192    
-64    -48    
-336   0      
240    -64    
144    112    
256    336    
-1152  272    
560    -80    
64     368    
-272   -656   
-160   208    
240    -1008  
-704   -160   
384    -16    
-128   240    
352    368    
32     416    
-320   -400   
384    -96    
80     -144   
528    -80    
-240   160    
-32    -224   
-112   64     
192    -512   
272    32     
-176   -208   
64     80     
-144   32     
-64    80     
144    144    
-656   96     
-272   -640   
1008   -1552  
96     -944   
-768   672    
1648   -160   
-496   -208   
-640   80     
400    80     
608    144    
-224   96     
-16    -256   
128    -256   
352    192    
224    32     
144    128    
-336   112    
496    -368   
80     128    
128    -304   
-176   192    
592    -416   
-432   96     
752    144    
-224   400    
-1024  -416   
352    208    
736    -16    
-192   80     
-592   -80    
256    -48    
224    -416   
-176   -160   
144    32     
-272   64     
496    176    
80     128    
-512   64     
144    -176   
432    160    
-144   16     
464    -288   
-288   -16    
288    -128   
160    16     
-48    -80    
80     -96    
-32    -96    
432    -432   
-240   64     
-112   -800   
112    -48    
128    64     
96     -288   
288    -432   
496    -560   
-144   -768   
-336   -224   
496    -608   
224    -128   
-464   240    
-416   144    
400    128    
-16    -288   
80     0      
64     -688   
-144   80     
256    80     
128    -80    
-208   80     
384    112    
-64    -80    
-128   160    
-48    -32    
64     -320   
-240   -96    
160    -176   
192    320    
96     -752   
16     -720   
-48    64     
-48    144    
272    -2320  
-832   -288   
1968   -1136  
-1488  -32    
-176   -384   
1216   448    
-688   288    
16     -48    
-272   -48    
368    -256   
-160   -400   
0      160    
-48    -128   
-48    0      
112    -48    
272    -800   
-208   416    
-32    -224   
224    -48    
160    80     
-64    32     
800    1120   
-1664  144    
768    -192   
304    -448   
-736   -256   
192    208    
-352   16     
48     -608   
256    -176   
144    -176   
-464   192    
112    592    
224    -32    
-32    96     
-208   -16    
-160   -128   
272    -144   
-80    -16    
144    144    
-208   48     
-48    -64    
-1168  -176   
-384   -240   
160    -80    
48     -240   
-304   192    
560    -1312  
-288   128    
-144   208    
-560   -1760  
1872   -752   
-784   320    
208    544    
-128   144    
-848   288    
1008   32     
-144   592    
-336   112    
-64    80     
192    16     
64     128    
-288   -816   
80     192    
-160   -368   
224    -48    
-80    -48    
-304   -304   
-32    -256   
240    -16    
-160   16     
176    352    
240    -816   
-1328  384    
576    80     
288    -640   
48     -224   
-416   -48    
384    -144   
-336   64     
64     -48    
-352   80     
144    -128   
128    -96    
-64    -288   
-368   0      
208    32     
-32    -32    
16     -320   
48     80     
-448   -144   
-16    144    
16     -416   
-304   -224   
-224   -32    
224    -144   
-304   240    
112    416    
784    0      
-192   -80    
-352   320    
480    -160   
-496   208    
-16    -432   
288    656    
-304   -640   
-528   816    
32     352    
-320   64     
496    -64    
-208   32     
-336   32     
0      80     
288    144    
0      -112   
-16    352    
-352   -480   
64     240    
496    -496   
-400   -864   
-320   -64    
-752   2064   
576    112    
-272   -688   
-112   304    
656    448    
64     864    
-624   -352   
-112   -864   
-304   688    
-176   -816   
-416   -288   
0      288    
192    80     
288    -80    
-208   -80    
-112   480    
-160   352    
208    -16    
0      -416   
-48    48     
-160   368    
-16    -96    
-128   -448   
-400   -480   
-144   160    
16     96     
112    240    
96     64     
32     -96    
-144   416    
-48    -128   
-208   368    
64     32     
176    112    
-432   -160   
80     -288   
96     -48    
384    1344   
-112   240    
-112   -144   
144    -336   
0      432    
0      -240   
-256   -48    
144    320    
368    400    
-368   288    
-112   -448   
112    -128   
48     304    
-432   -688   
640    0      
-240   -80    
-208   304    
-544   -880   
-144   -1472  
-272   -1040  
448    -1552  
240    1040   
-16    1136   
-272   -128   
-192   -192   
160    128    
64     -80    
48     -208   
-336   0      
400    128    
-144   288    
-48    0      
128    0      
-544   16     
160    48     
-32    48     
80     64     
-224   144    
240    592    
512    192    
-144   144    
-416   416    
0      160    
208    -80    
304    -1072  
-384   544    
-96    352    
272    -320   
224    -368   
-192   -400   
-400   -768   
288    -192   
288    144    
48     224    
-240   240    
-32    96     
272    -48    
0      -48    
80     -64    
-128   -256   
-96    -96    
128    -96    
96     -80    
-64    -672   
-272   -752   
-128   560    
208    -256   
16     -512   
320    -304   
-528   -976   
64     464    
176    512    
0      352    
144    -304   
-304   144    
-64    1024   
-32    144    
192    -256   
-96    512    
-144   -128   
144    256    
96     -496   
-144   272    
-192   320    
160    256    
-16    -32    
16     -80    
-336   368    
368    368    
32     96     
-32    32     
-48    96     
-896   -224   
1568   -2016  
-224   192    
-80    176    
912    624    
-1552  -448   
352    -80    
848    96     
-624   112    
-48    176    
64     128    
128    176    
-320   -128   
-48    -80    
320    -144   
-160   -32    
48     96     
-48    80     
96     -16    
-16    -48    
16     16     
-208   -576   
1184   432    
-960   112    
624    -48    
192    384    
-720   0      
48     48     
416    240    
288    -160   
-240   176    
-144   240    
-80    0      
208    16     
64     96     
80     -16    
-448   176    
448    464    
-192   -144   
464    -112   
-112   0      
-288   224    
-176   -400   
960    240    
16     80     
144    -320   
384    -400   
-16    0      
352    512    
-160   336    
256    80     
-288   80     
-208   272    
128    160    
48     96     
288    0      
48     240    
-224   -32    
288    -96    
496    -576   
-32    -1600  
-384   112    
160    112    
16     0      
224    192    
448    128    
-96    -160   
-32    512    
-224   144    
128    64     
-1504  -2048  
2496   -1760  
240    928    
-1200  576    
16     272    
-144   -256   
368    -176   
-112   656    
-32    304    
-16    192    
416    -48    
0      176    
32     80     
96     160    
192    240    
144    96     
-272   112    
400    0      
-96    32     
-176   -496   
-864   -496   
720    -304   
-448   -944   
768    -96    
-48    -208   
-736   144    
624    96     
-224   192    
416    144    
-160   192    
80     -128   
-208   112    
-64    128    
16     144    
144    304    
400    -160   
-576   240    
80     -1216  
16     256    
208    144    
-144   64     
224    48     
-64    96     
-432   -288   
448    160    
288    16     
-560   -80    
448    -208   
-304   -112   
448    192    
-32    -48    
-368   96     
-32    -944   
-528   160    
912    -224   
-704   64     
192    -32    
160    0      
32     112    
272    160    
-272   192    
-128   288    
32     -80    
208    -416   
-16    80     
-32    -352   
-272   64     
384    -240   
-224   192    
304    -1456  
208    -16    
-320   32     
80     208    
-48    -48    
0      112    
48     224    
64     224    
176    -144   
-48    64     
80     944    
304    368    
496    -272   
-1504  1728   
1680   -48    
-448   -416   
416    -112   
-96    -624   
-304   352    
304    16     
-144   640    
304    -192   
-416   -96    
176    176    
48     -320   
160    96     
-400   -48    
272    64     
-160   368    
176    240    
80     -208   
-96    96     
-352   -160   
992    160    
-752   -176   
-272   -960   
496    -176   
-272   16     
128    112    
288    480    
400    320    
-496   32     
-272   208    
288    -208   
192    128    
176    -128   
192    144    
-240   128    
-224   -464   
144    144    
272    176    
-160   -64    
64     -144   
-80    -208   
-64    -688   
432    -832   
-240   176    
160    -48    
-80    -160   
48     -64    
32     -592   
288    -240   
-160   -1488  
-1936  176    
1664   624    
-208   -288   
-368   -240   
816    -96    
-848   -624   
320    640    
-160   -688   
256    320    
400    112    
-256   -128   
-48    96     
160    -192   
-432   -416   
224    -16    
-48    64     
-144   256    
32     -32    
-112   -256   
-1472  -144   
944    928    
1264   -48    
-1456  -384   
1184   -688   
-288   -992   
-32    992    
1104   896    
-448   32     
-16    -112   
-432   112    
528    -160   
32     16     
-128   -48    
-16    96     
-496   480    
224    64     
304    704    
80     672    
-80    496    
80     -416   
272    16     
64     -736   
160    1712   
992    944    
-288   592    
-224   144    
368    336    
-672   160    
192    -688   
-80    -256   
256    -112   
-272   -16    
-32    -192   
-208   -752   
-384   -368   
144    240    
-416   -896   
64     -256   
272    -144   
64     224    
96     -240   
144    320    
-192   512    
-80    -160   
-32    -272   
-560   -144   
-448   528    
384    -32    
-272   16     
-480   -1440  
1888   -1488  
560    -16    
416    608    
-1120  592    
224    -704   
80     -1392  
448    -80    
-128   624    
-432   -880   
-16    352    
160    400    
288    -192   
32     -128   
-1264  -128   
-128   -144   
528    -528   
144    -320   
-144   -528   
-336   -1664  
240    528    
304    672    
-48    -608   
-640   -176   
800    208    
-304   560    
160    80     
-240   -272   
-64    1504   
64     720    
16     -448   
272    96     
-32    48     
-48    592    
384    48     
-48    -640   
48     64     
96     336    
-288   -432   
64     -144   
288    -464   
-320   -160   
0      464    
-112   -288   
-240   -416   
64     -976   
-256   800    
288    -496   
-208   -384   
672    -960   
-464   64     
32     -448   
-672   256    
784    -128   
64     -224   
-320   -176   
-16    0      
-224   -1344  
-400   -2144  
288    -144   
128    1056   
32     272    
-480   -160   
-224   144    
-144   -128   
192    496    
240    400    
-416   416    
-608   -80    
80     96     
32     368    
240    96     
-32    -240   
-464   -144   
128    288    
-416   272    
128    528    
-336   -1328  
-384   -256   
160    272    
48     -80    
-192   1968   
720    -64    
-592   -720   
-1648  -1216  
208    -480   
80     560    
-448   352    
304    -272   
48     688    
-272   -512   
-48    224    
-208   -176   
336    -16    
32     176    
-80    96     
-400   -352   
16     -192   
256    144    
-80    32     
-80    176    
-192   1440   
112    224    
-256   368    
368    496    
-208   -272   
336    464    
-160   416    
0      32     
-96    -64    
-160   -16    
208    32     
-64    -32    
-240   -208   
160    144    
-176   352    
-320   768    
400    32     
272    -320   
-176   128    
144    -48    
176    272    
-256   -256   
-32    -48    
-64    64     
432    32     
-352   0      
32     32     
-96    64     
64     272    
1232   1408   
-1376  944    
-528   640    
1184   144    
-352   192    
-1280  -528   
816    -64    
96     -368   
-496   320    
592    0      
-144   128    
-224   48     
160    112    
-64    -96    
256    96     
-464   64     
64     64     
-336   192    
192    80     
-112   48     
-128   -64    
96     -96    
944    -480   
-1264  224    
928    -304   
-224   144    
352    240    
-512   64     
144    -96    
400    -48    
-208   -64    
-160   96     
-32    128    
-48    -48    
304    160    
-32    -64    
-288   80     
96     -112   
-16    288    
-80    48     
-224   -400   
512    176    
-640   -640   
-224   -64    
1360   480    
-128   320    
-896   96     
80     256    
32     512    
-384   16     
400    -256   
464    -48    
-128   16     
-384   -96    
-256   -240   
240    -352   
400    -288   
-224   -16    
-400   -16    
160    -176   
736    16     
-608   -304   
-256   -96    
512    96     
448    96     
480    544    
-1456  416    
-160   -432   
640    208    
-224   -256   
1184   5296   
-352   2080   
-416   -1168  
592    -832   
-960   -224   
-64    304    
48     304    
848    -368   
-192   -352   
-672   -368   
304    288    
192    -32    
-240   192    
176    -160   
-176   160    
-16    -32    
-240   208    
304    -48    
-576   80     
288    448    
768    256    
-1184  208    
624    -96    
-944   -304   
448    128    
240    80     
-448   176    
224    -128   
64     128    
0      -240   
128    64     
32     -64    
-112   208    
224    304    
-176   416    
-272   -80    
224    -64    
128    -96    
-256   -48    
320    32     
32     112    
48     128    
-64    48     
160    224    
-96    352    
-96    208    
128    64     
-64    -80    
-128   -496   
-608   -592   
256    -192   
0      -368   
400    -272   
-176   80     
272    -16    
208    112    
-160   -112   
64     48     
16     208    
96     288    
400    96     
-256   176    
-128   -80    
-144   -112   
-64    48     
256    144    
128    -176   
-272   -960   
368    320    
-240   336    
-32    384    
96     224    
0      -352   
-144   -224   
-32    -80    
160    144    
160    448    
-224   320    
-64    320    
-16    176    
112    240    
-272   -2736  
-144   -816   
1200   480    
-1760  544    
880    -848   
480    -144   
-720   1136   
-96    448    
688    272    
0      -272   
-304   224    
64     176    
48     -48    
112    -240   
-32    64     
224    1136   
-160   96     
0      80     
96     208    
-64    80     
240    784    
-912   16     
1056   -176   
96     1344   
-400   -736   
64     -144   
112    176    
448    672    
-128   -256   
224    80     
-144   -144   
96     -32    
64     -48    
176    -2016  
-32    -32    
48     -176   
112    192    
-16    144    
144    656    
144    -80    
-272   -208   
48     336    
128    448    
-144   -448   
112    -160   
-272   592    
-112   0      
208    -432   
352    -560   
176    128    
-1616  -64    
1872   416    
272    -352   
-1248  528    
1504   176    
208    336    
-1136  -80    
528    1264   
-96    -1056  
-128   -528   
208    336    
-32    -272   
-256   0      
256    -368   
368    176    
-112   -160   
-16    112    
32     -496   
-96    160    
192    -16    
768    1664   
-848   -944   
-1696  320    
2720   -368   
-720   -160   
-432   1648   
848    960    
320    1088   
-80    -192   
80     -80    
-80    -1472  
-320   304    
80     -32    
336    288    
48     320    
-272   160    
272    384    
-176   624    
416    1312   
464    0      
-400   -16    
-144   -592   
224    144    
-432   -928   
48     -224   
256    400    
-720   -288   
96     48     
448    432    
-368   144    
400    -656   
112    -32    
368    -512   
-560   224    
480    48     
-512   80     
32     1072   
672    -16    
-1152  -1120  
224    -256   
-80    -240   
80     0      
32     -528   
-496   -288   
32     16     
128    80     
256    -16    
-256   -224   
-96    -176   
432    80     
80     -1392  
-2160  -560   
1408   1056   
240    784    
-32    544    
128    736    
-304   1024   
-144   -80    
336    -2832  
80     -576   
-128   -1936  
-528   -1088  
400    -144   
352    -192   
-384   208    
176    -1600  
144    -128   
-80    -400   
32     -688   
-48    528    
48     464    
32     32     
512    400    
-128   -128   
-336   272    
736    -144   
-512   -784   
576    -1184  
-176   -208   
512    1088   
-208   -384   
-96    -272   
-32    128    
80     -64    
96     -48    
-48    48     
224    0      
-656   -592   
288    -864   
96     -768   
-1232  -976   
96     -736   
-1488  112    
320    400    
-96    -992   
-416   0      
176    48     
-112   -752   
512    320    
-128   80     
-240   144    
544    192    
64     32     
16     -1120  
-288   1280   
1456   -496   
-880   -672   
48     1104   
192    192    
-256   -96    
-240   -640   
-32    -80    
480    -592   
-448   -784   
0      -1552  
64     432    
272    96     
-32    304    
16     192    
-160   288    
208    304    
0      16     
-224   -192   
304    0      
-144   -80    
32     16     
144    800    
320    400    
-288   -128   
-96    -816   
48     240    
-176   -2272  
-432   464    
640    176    
-384   -320   
80     -144   
-224   -64    
256    -304   
-336   144    
-816   0      
-80    128    
64     48     
80     -80    
64     -528   
-16    -176   
-96    192    
192    -704   
-48    -32    
-80    112    
208    16     
-272   -96    
-208   -1104  
-80    384    
992    176    
-960   32     
112    320    
-320   -80    
-16    -128   
96     -400   
-128   -208   
240    144    
-480   -208   
416    -176   
32     32     
64     -128   
-400   -16    
128    -16    
80     -80    
336    -16    
-416   32     
64     -192   
-80    -96    
64     -384   
192    -208   
-160   -48    
-32    -80    
-48    80     
160    -288   
-176   32     
464    -32    
-1824  -704   
1760   720    
592    -16    
-1504  -80    
416    160    
576    -48    
-96    -64    
-64    -112   
-80    48     
-32    -112   
160    144    
-48    -480   
-112   -112   
-96    0      
416    128    
-96    64     
-80    -16    
48     -16    
-16    -144   
16     96     
-64    -16    
-688   -400   
656    -416   
592    -240   
-1328  -832   
-432   736    
608    240    
-96    176    
-16    -48    
-448   96     
-16    -32    
240    32     
-80    -96    
0      -48    
-384   -80    
-64    32     
352    -32    
-48    -320   
-400   192    
-256   0      
848    32     
-224   896    
-896   112    
-48    96     
416    -208   
-80    368    
-352   -80    
288    -592   
976    560    
-304   -288   
-1376  0      
752    320    
-352   144    
528    0      
-272   48     
-416   128    
-464   160    
448    160    
96     -432   
448    -336   
-192   96     
-144   112    
64     240    
-352   0      
-16    -64    
64     -416   
16     128    
368    -32    
-512   144    
-48    -624   
-256   1760   
1200   -1168  
-1920  -784   
-208   48     
576    -160   
-608   144    
128    352    
224    -240   
-496   128    
32     0      
-304   -160   
416    64     
-288   -128   
32     176    
176    -48    
-192   176    
-112   32     
-144   80     
336    -16    
-704   -112   
416    -208   
-336   -80    
240    -64    
320    -64    
-320   80     
-384   176    
384    192    
16     -64    
-128   64     
-432   -192   
160    48     
144    192    
0      192    
-64    448    
464    288    
-80    448    
-272   128    
160    272    
160    208    
-128   224    
-1136  -144   
80     48     
-144   -496   
48     -240   
416    -96    
-144   -64    
80     -112   
48     -112   
-176   -112   
80     -400   
-144   -144   
-32    -224   
432    -32    
-320   432    
512    672    
-1008  -592   
272    -912   
128    -736   
-336   -352   
144    -48    
-80    32     
-256   -960   
-304   -496   
224    -592   
-400   -624   
336    -48    
-128   -256   
-128   -192   
-112   -528   
256    192    
-272   256    
-48    240    
-16    -32    
192    -192   
48     -128   
-80    -128   
-160   224    
-16    672    
96     -240   
48     208    
-496   -656   
944    -880   
-208   480    
128    -736   
-256   -336   
-96    1104   
400    -304   
32     208    
-80    64     
-128   -80    
-80    240    
96     -48    
176    -144   
-144   -160   
-176   192    
16     -80    
-48    -80    
48     -320   
-48    0      
96     -80    
-432   32     
32     608    
912    -208   
-992   224    
-128   304    
144    -80    
-128   -528   
672    -960   
32     -304   
-160   304    
-32    80     
160    432    
0      160    
256    32     
-272   -128   
-112   16     
128    -80    
352    176    
-96    384    
-192   224    
-32    224    
288    -64    
-48    -32    
-144   48     
48     -96    
400    304    
-144   320    
-80    176    
-144   -112   
176    -16    
176    752    
960    96     
-1984  32     
1936   -48    
-368   320    
-592   208    
544    256    
80     -496   
-256   1024   
160    704    
80     -128   
-80    -560   
176    128    
32     96     
-320   -32    
0      112    
272    224    
-112   -208   
-272   224    
272    96     
64     -16    
-64    1280   
1904   -304   
-960   800    
560    -192   
-800   -960   
448    -1040  
-704   -1328  
256    -416   
48     544    
48     1072   
336    480    
-240   32     
272    224    
48     -256   
-688   464    
816    320    
16     1456   
0      784    
-32    352    
160    -160   
32     128    
64     528    
-320   -416   
640    -1936  
-240   -192   
-224   848    
592    1280   
32     496    
-384   656    
608    400    
64     -80    
-336   48     
-112   -80    
176    720    
272    -352   
-112   -48    
48     -96    
128    624    
688    -416   
-96    176    
144    192    
-64    48     
560    304    
144    128    
-320   -304   
16     -160   
-224   16     
400    -304   
80     -400   
688    848    
288    336    
352    -320   
400    -64    
-272   64     
-352   784    
96     -176   
448    -16    
-240   192    
0      416    
-352   -656   
240    -224   
272    48     
-256   416    
-272   -112   
240    -80    
0      -48    
64     -272   
0      208    
-16    -48    
240    448    
144    -1536  
-432   -64    
-352   -752   
1120   -944   
-560   -640   
416    -288   
-416   336    
368    160    
80     -112   
-80    144    
160    32     
-144   -16    
304    -16    
-272   -112   
144    176    
96     112    
16     272    
240    -608   
-80    48     
240    -272   
-144   144    
80     -272   
96     -496   
-288   -256   
160    80     
-48    336    
336    256    
-224   320    
64     -32    
144    80     
-64    64     
240    1120   
960    240    
0      48     
-992   -992   
640    -832   
32     48     
192    80     
-512   160    
48     208    
16     240    
176    -64    
288    96     
-96    240    
-208   48     
400    -16    
144    0      
-256   -624   
0      272    
224    272    
48     -32    
144    112    
128    176    
-400   80     
304    -528   
64     64     
0      -368   
64     80     
-48    -16    
80     112    
-704   320    
2816   -640   
-1328  -464   
-112   -16    
560    -112   
-208   96     
0      160    
-144   -320   
-208   336    
400    -304   
-80    80     
96     16     
-128   176    
80     -288   
304    112    
-256   -96    
320    -80    
-240   240    
32     32     
320    48     
0      -1760  
-816   464    
752    -272   
-688   -1056  
336    -32    
240    -1008  
-400   0      
-64    -256   
112    48     
592    48     
-112   -256   
-272   96     
96     -272   
-192   -1008  
560    128    
-48    -208   
64     -96    
-304   96     
560    -240   
-496   -112   
528    -48    
16     -144   
32     -320   
304    112    
-544   -1008  
112    160    
-32    64     
64     0      
176    -560   
736    -64    
-704   -176   
224    -256   
-144   -544   
704    -16    
-64    176    
-1360  -400   
624    16     
-416   -544   
112    -208   
240    -400   
-192   -32    
144    -672   
32     224    
176    112    
-224   208    
240    -48    
-144   -64    
-128   -176   
176    -96    
-288   -80    
608    864    
-1120  -160   
336    -288   
-64    -368   
-720   -704   
1152   -176   
-880   -1776  
160    -208   
80     -96    
-96    -48    
-208   -240   
-16    32     
176    -144   
-80    176    
-128   -112   
-352   160    
80     -336   
160    -224   
32     -48    
80     0      
-208   48     
-400   -816   
624    304    
-480   -192   
-624   0      
512    0      
368    -144   
256    48     
-528   -192   
416    -368   
-96    48     
-1088  -32    
272    -96    
176    448    
-448   192    
-224   -96    
0      -512   
48     400    
656    -160   
-512   112    
-192   32     
256    32     
48     -32    
-64    -128   
-32    176    
-336   208    
416    -32    
144    -32    
-928   -448   
2656   1632   
-2752  1216   
1200   -1456  
1408   96     
-1072  160    
-224   -48    
64     -144   
1056   256    
-272   -64    
-432   48     
448    -64    
-160   80     
176    -96    
272    224    
-656   -144   
160    80     
368    -16    
-32    -32    
-176   64     
640    1456   
416    720    
-640   0      
144    -480   
-304   -64    
-464   -208   
976    320    
32     -16    
-352   368    
-80    160    
112    -96    
32     -672   
-496   -176   
448    -240   
16     -160   
-336   16     
-176   -192   
-64    -400   
16     -528   
112    -144   
160    -16    
-320   -128   
96     -464   
32     -512   
-176   -528   
176    -384   
-16    -592   
64     -256   
-752   -672   
-336   -192   
96     -480   
-32    -432   
-336   -272   
0      -368   
-752   768    
432    -32    
32     224    
-432   192    
-80    336    
-544   48     
48     -432   
-688   -784   
16     976    
-176   336    
-288   224    
224    624    
-176   -272   
-128   0      
-480   320    
-432   -80    
80     176    
96     -176   
-224   96     
-48    128    
-32    0      
128    -192   
-176   -304   
0      64     
-144   16     
-224   432    
-464   -48    
208    -112   
-336   -368   
672    -1120  
-640   272    
288    -448   
176    112    
-256   160    
-128   160    
-96    64     
-208   192    
-48    80     
-80    96     
64     -96    
64     160    
224    32     
-192   48     
48     80     
-144   64     
16     208    
32     96     
-48    -192   
352    112    
-1600  176    
592    -240   
192    608    
288    -192   
-416   144    
-320   240    
400    -768   
320    -208   
160    -32    
-544   352    
-368   -176   
432    240    
80     112    
-224   0      
-48    80     
144    16     
-944   -64    
64     80     
144    -48    
-256   32     
-160   32     
48     -128   
-80    80     
160    112    
288    208    
-192   48     
80     416    
-560   -96    
336    -288   
-1760  0      
1792   1264   
16     -640   
-1456  704    
1072   768    
400    512    
-240   960    
-288   880    
-64    1504   
416    272    
-192   -720   
-208   416    
-64    -256   
-16    464    
208    -320   
32     32     
-96    32     
-368   -432   
288    432    
64     -32    
144    -288   
-2144  112    
1136   176    
16     -384   
-1008  -1792  
304    -544   
464    400    
-544   -576   
-256   -720   
496    -128   
-688   128    
144    512    
48     608    
-448   656    
112    208    
176    -96    
-192   -256   
304    -368   
-368   -256   
144    128    
272    112    
-352   96     
-336   -80    
-208   -1040  
1296   -1456  
-640   -112   
416    1616   
-784   544    
-48    96     
336    720    
496    128    
-208   -64    
-240   -96    
-144   -64    
592    144    
-288   -384   
-912   112    
208    160    
-784   256    
624    -160   
-416   48     
-256   16     
160    400    
304    -16    
48     16     
-512   160    
-144   128    
0      176    
-32    912    
-144   -1552  
624    -1232  
144    -112   
-384   240    
-640   288    
160    -544   
288    -192   
96     -16    
-576   -16    
-96    -288   
448    -432   
-96    112    
32     160    
-304   256    
-256   -112   
768    192    
-336   -48    
-192   128    
-128   -512   
240    -1024  
48     -1504  
-320   -464   
-48    304    
-48    48     
32     -80    
432    160    
-208   288    
496    400    
-464   -32    
-48    -64    
112    -96    
-240   96     
160    -240   
-224   48     
-96    48     
160    224    
-160   -48    
192    80     
-192   -16    
80     32     
256    32     
48     48     
-288   96     
64     368    
-80    288    
-224   80     
112    144    
-112   -96    
96     48     
80     208    
-448   64     
256    -144   
256    624    
-1008  208    
304    -160   
464    48     
-512   384    
208    96     
32     -80    
352    32     
-64    240    
-144   0      
-192   160    
160    208    
160    192    
160    112    
-80    512    
-336   -304   
224    0      
288    240    
-64    32     
-144   -96    
0      112    
288    80     
48     208    
-176   0      
112    -64    
-128   -112   
176    176    
96     80     
-112   80     
192    -2192  
-1824  528    
2016   112    
-800   -960   
80     352    
384    -96    
-416   336    
80     -32    
96     16     
80     224    
-160   -96    
-224   288    
336    160    
128    -384   
-368   144    
192    160    
-16    -496   
96     -32    
-32    -784   
-32    -16    
352    832    
-720   -784   
-384   368    
1408   384    
-432   -112   
-256   128    
128    112    
304    128    
-48    -80    
-128   -112   
176    112    
-272   -128   
240    48     
80     -1472  
-304   160    
480    192    
-32    224    
-288   208    
256    0      
0      160    
96     16     
-256   160    
112    112    
-176   64     
576    16     
-304   64     
-96    176    
208    32     
-192   -368   
-416   -944   
992    -2496  
-160   400    
912    -16    
-160   112    
176    80     
-528   160    
400    496    
512    208    
-608   96     
48     -400   
32     96     
272    -336   
-48    176    
-32    -640   
368    176    
-128   0      
112    -64    
-96    304    
288    304    
272    256    
-176   256    
-320   464    
1712   -624   
-672   224    
240    -208   
-288   208    
-80    -160   
768    656    
-1008  176    
-32    -144   
272    -528   
160    32     
48     80     
-144   176    
32     -64    
80     256    
192    -80    
32     -864   
368    320    
-80    224    
16     48     
224    -32    
-560   32     
480    176    
368    32     
-400   -272   
-144   -416   
320    64     
176    336    
-224   -112   
400    -752   
144    480    
-336   -352   
64     -48    
336    -96    
240    272    
-352   -80    
176    512    
352    -256   
-480   80     
368    -16    
-16    -48    
-96    48     
208    -720   
-96    128    
112    -16    
-240   -352   
32     -48    
-16    -144   
224    -1088  
-672   -3952  
-1392  -1440  
944    -240   
96     64     
288    240    
-32    240    
-672   -416   
192    -16    
512    -480   
-112   96     
-160   48     
-304   -224   
496    224    
112    -416   
-352   128    
-208   -288   
208    32     
192    -944   
48     128    
-256   -448   
208    -400   
-64    -672   
-144   112    
768    416    
-416   752    
64     -96    
256    -32    
192    304    
-272   704    
32     -240   
432    -816   
112    640    
-224   -272   
-160   -256   
208    32     
-64    -48    
176    416    
576    688    
-112   848    
288    -32    
-128   -272   
48     -64    
-144   16     
192    -320   
368    -224   
-160   624    
336    1168   
-336   -16    
-192   -1024  
624    -1152  
-112   400    
-144   -608   
-208   80     
400    80     
-752   -1248  
448    -912   
64     -448   
-32    368    
160    -368   
32     176    
-128   -160   
160    0      
0      -176   
32     32     
112    -560   
-96    -496   
512    -656   
64     368    
-128   -96    
-208   112    
176    -16    
48     -48    
-112   32     
-16    -272   
-640   -240   
48     -192   
160    -16    
-48    -160   
0      0      
-144   -656   
208    80     
640    -96    
-1648  320    
736    -128   
-400   176    
336    -288   
-112   -64    
-192   672    
-112   256    
-16    -272   
0      -64    
-48    112    
-160   -16    
32     160    
336    -320   
-272   352    
-272   320    
-128   48     
272    48     
144    -176   
-352   -80    
-720   -272   
496    -32    
-624   -96    
176    -96    
144    128    
80     224    
256    -336   
-688   -464   
-144   128    
320    144    
240    -464   
-16    -96    
-160   272    
0      176    
0      -272   
240    -32    
-336   -608   
-144   -64    
176    16     
-32    -96    
48     32     
-320   -48    
128    368    
-80    112    
272    128    
-576   16     
-784   64     
-160   -64    
832    -592   
-336   -1328  
1680   -1040  
-1280  112    
1168   -160   
-528   -768   
-928   -544   
-96    -80    
-144   -832   
-80    880    
-624   1808   
-400   64     
96     -688   
288    -336   
-352   432    
-624   384    
96     96     
-624   -240   
176    480    
-32    208    
-176   160    
144    -144   
-656   -560   
1264   -704   
-272   -208   
-928   -368   
848    176    
352    624    
128    176    
-432   624    
176    368    
-192   32     
-336   -176   
64     -144   
352    -64    
-96    16     
-272   -64    
432    80     
-400   -112   
96     -112   
-96    -48    
224    112    
16     160    
-176   208    
192    96     
512    -416   
272    -576   
-720   288    
208    0      
32     -144   
-128   320    
128    -656   
-288   416    
496    -48    
-240   176    
-288   128    
-48    -400   
48     -432   
832    -480   
-832   176    
-112   128    
288    -16    
-208   -96    
-176   32     
-368   -128   
-624   352    
672    -400   
-640   160    
-176   32     
0      96     
112    -720   
352    3920   
-912   1728   
-192   -464   
1696   -416   
-784   208    
-864   64     
0      432    
1024   -224   
-144   0      
-560   -272   
-464   256    
384    112    
-16    -160   
208    128    
-112   112    
-64    144    
64     112    
128    16     
-288   -320   
672    448    
-160   -176   
-464   304    
112    -96    
-64    64     
784    -48    
-672   624    
192    176    
-144   144    
160    64     
48     32     
-48    16     
128    -160   
-80    48     
-336   -32    
-48    -48    
320    240    
-112   -160   
-400   -528   
-672   -384   
608    240    
-576   -48    
208    128    
-208   32     
-256   128    
272    144    
-176   48     
240    -128   
-528   -352   
112    -48    
16     -352   
-176   0      
128    -80    
208    320    
320    -176   
-352   576    
784    32     
-656   320    
304    464    
576    176    
-64    16     
-80    144    
-176   32     
176    16     
-48    -80    
240    16     
0      160    
-64    272    
-16    208    
-48    -80    
272    320    
96     96     
-432   112    
192    144    
112    -32    
16     240    
48     -64    
-64    144    
0      -80    
-32    32     
96     -176   
-96    96     
-1120  -512   
2112   -1168  
-1232  -112   
-208   16     
352    -80    
16     304    
304    0      
-288   384    
336    272    
-240   -208   
240    96     
-160   -16    
-144   128    
208    -240   
-64    176    
32     -272   
-144   64     
96     80     
-16    -192   
48     64     
784    352    
-1680  992    
864    -144   
112    -176   
-192   -96    
48     80     
-400   160    
288    480    
176    -64    
48     -64    
-80    -80    
-80    304    
-112   80     
240    -320   
240    -320   
-384   112    
224    112    
48     -48    
-144   224    
352    -80    
-400   272    
160    -48    
32     144    
-208   -96    
176    144    
128    0      
-32    224    
-64    -64    
-64    112    
-160   -416   
1152   544    
480    96     
-1248  -448   
1072   -160   
-160   -16    
-560   -48    
560    -64    
-80    -144   
-352   -64    
32     -32    
-128   48     
304    48     
-240   112    
400    -48    
-128   32     
0      208    
80     48     
-80    -144   
16     -144   
-96    64     
-128   -320   
1072   608    
-864   160    
96     -688   
560    -48    
-384   304    
64     -240   
608    176    
96     192    
64     112    
-288   240    
-48    192    
144    16     
80     304    
-80    16     
304    48     
-96    608    
-432   32     
-48    -304   
368    480    
-320   48     
-688   -704   
1008   -256   
0      -64    
-368   -400   
512    192    
416    144    
-352   16     
-272   160    
96     48     
144    144    
-80    112    
32     -48    
-48    -256   
16     160    
-560   288    
864    -112   
16     -96    
256    48     
144    -80    
-240   -1360  
112    128    
0      32     
16     208    
-144   -176   
640    160    
304    176    
-192   -208   
384    80     
-368   400    
640    2640   
704    -128   
-1872  -784   
-192   -224   
1664   336    
-832   -1648  
176    -2096  
688    528    
240    960    
-672   336    
288    128    
16     -144   
-16    208    
224    432    
112    144    
-336   832    
208    -448   
576    0      
-208   288    
-32    464    
-16    -1488  
176    -320   
64     -1136  
-80    -864   
-48    -256   
176    352    
-64    672    
16     560    
-128   432    
96     0      
16     -336   
-32    -96    
-16    608    
32     -96    
144    208    
112    0      
128    704    
128    544    
-144   592    
224    48     
16     112    
-112   144    
64     960    
112    976    
464    -96    
-64    -304   
-48    -176   
-208   208    
112    -608   
-16    576    
-112   -912   
528    832    
-272   -112   
144    832    
48     704    
256    640    
176    304    
-576   -896   
288    -880   
176    80     
128    400    
-96    -800   
-80    256    
-48    -128   
144    224    
-208   -192   
0      64     
272    -416   
-192   416    
432    -96    
-224   176    
304    -80    
-176   -1840  
160    -896   
80     32     
208    -208   
-288   -48    
352    -240   
384    -288   
-32    160    
-64    -400   
192    288    
208    272    
368    -1728  
-304   512    
-144   -448   
240    -240   
336    -256   
-176   -608   
48     240    
-48    -32    
400    -128   
-16    -176   
176    48     
-144   48     
320    192    
-48    528    
128    400    
-48    224    
-112   -208   
848    -336   
-1168  416    
272    -304   
400    -528   
368    -512   
0      224    
-416   144    
176    -480   
176    -112   
240    272    
-112   -240   
-336   -208   
128    -64    
160    -240   
-176   496    
256    -336   
-320   -96    
-32    384    
112    368    
656    -1200  
-384   -336   
-112   592    
-240   64     
528    -432   
80     -656   
-144   -160   
64     128    
-80    416    
192    -64    
-304   -112   
-1520  -848   
880    208    
512    -496   
-976   -944   
-1472  -448   
672    -768   
-128   0      
-192   -960   
-160   -848   
-256   -656   
128    128    
128    -1376  
-16    -112   
256    -32    
-48    -208   
-64    -32    
-112   -128   
-96    -48    
160    -160   
-192   16     
-240   -352   
1360   -752   
-1840  -128   
1280   -48    
80     -112   
-752   -128   
944    -1040  
-64    96     
208    -256   
-16    160    
-320   -32    
0      96     
0      0      
224    208    
400    112    
-416   -48    
-928   -160   
592    -32    
272    128    
-96    -128   
-48    112    
-272   -736   
-288   496    
256    -32    
-144   -416   
-16    -320   
272    64     
112    128    
-576   64     
-16    96     
128    -16    
-240   -96    
-16    -48    
-496   48     
-48    -256   
48     192    
48     -400   
384    -224   
64     272    
-144   176    
-576   -16    
80     -32    
160    -32    
-32    -96    
-560   -432   
944    -64    
-64    -160   
-192   16     
256    -80    
-64    1280   
1264   3648   
800    -48    
-1392  -480   
-256   -320   
992    0      
112    -64    
-320   -48    
-288   96     
-32    32     
176    80     
336    -32    
-304   -80    
80     -320   
112    208    
-16    -288   
-128   256    
464    -160   
-48    96     
256    -16    
-2432  -144   
880    128    
-288   -272   
160    64     
672    96     
-224   112    
-288   -64    
592    432    
-368   -64    
-272   512    
368    -288   
-192   160    
0      -208   
-304   -64    
400    -128   
-1264  -384   
496    -64    
-128   160    
-288   16     
-800   -16    
-80    48     
64     -160   
0      176    
-496   -192   
208    -96    
48     -144   
160    -48    
-160   -192   
-80    32     
-96    80     
368    160    
-128   160    
-400   -736   
-688   32     
768    64     
-368   496    
384    240    
-128   -64    
-64    -192   
64     -80    
80     -320   
-48    192    
-256   -32    
176    16     
288    304    
-160   160    
-496   -128   
16     -912   
-112   272    
-16    736    
576    -144   
-720   80     
48     272    
144    -128   
144    -80    
-256   -128   
160    288    
-496   192    
192    -592   
0      -256   
-208   208    
912    2528   
-1920  -1696  
-624   400    
1504   -800   
-880   -16    
-192   0      
-256   208    
736    336    
16     96     
-288   -400   
-96    192    
0      96     
352    16     
-160   -64    
0      -896   
-96    688    
176    144    
-240   -304   
48     -448   
0      80     
-416   192    
864    1168   
-576   -80    
-672   -176   
368    -96    
-176   -64    
128    48     
64     -80    
144    256    
-464   400    
-96    128    
192    0      
272    -176   
-448   -64    
-112   0      
160    96     
96     32     
-144   208    
224    0      
-272   80     
256    -32    
-16    -16    
16     112    
-32    64     
32     -80    
-224   0      
48     160    
-160   160    
-16    -16    
320    16     
-768   -496   
-688   -64    
464    -144   
-272   -224   
112    -128   
704    176    
-1056  -192   
416    -368   
160    -432   
-304   16     
16     64     
272    240    
-256   160    
48     -64    
0      64     
-144   -288   
-16    64     
224    -160   
224    -32    
-256   -96    
160    192    
-384   -912   
704    32     
320    -352   
-1952  -208   
784    112    
-48    -560   
-544   80     
320    -16    
-496   144    
576    -192   
144    144    
-304   0      
128    288    
192    256    
-160   0      
-16    80     
-256   -272   
-176   -16    
112    -48    
416    -352   
-80    -64    
464    752    
-576   -176   
400    -48    
-320   128    
-688   -1024  
848    -320   
48     432    
-672   112    
528    16     
16     64     
176    256    
16     128    
496    128    
-144   -160   
-272   368    
128    -336   
-192   192    
880    352    
144    80     
16     80     
-176   144    
64     224    
320    -256   
288    -336   
-64    -560   
-288   192    
912    400    
-208   32     
-816   -1056  
1824   -448   
1408   944    
-1872  528    
416    -32    
464    1360   
576    1296   
272    944    
-240   -160   
-192   416    
304    -976   
288    432    
-32    -128   
-240   400    
-272   -96    
480    -112   
-16    64     
0      368    
0      288    
0      352    
0      416    
-64    -16    
272    176    
64     128    
96     272    
-128   848    
192    304    
-32    -1008  
112    -576   
-96    240    
112    192    
272    -400   
-32    176    
-128   176    
-64    -304   
16     -560   
-288   144    
224    -400   
128    -512   
0      208    
-96    368    
64     192    
192    0      
240    448    
-128   -32    
-16    -272   
-32    288    
400    672    
-16    -96    
-144   -208   
-240   96     
528    -48    
-800   864    
800    816    
-128   1008   
48     96     
112    80     
64     -80    
400    -432   
-304   0      
0      176    
-32    432    
16     -16    
48     112    
112    -112   
-64    -64    
-288   -1296  
240    -272   
-96    960    
-496   720    
-128   -288   
64     208    
-80    112    
288    48     
-400   224    
128    -64    
64     128    
16     -208   
-848   -240   
224    -288   
-32    96     
1104   16     
-1328  800    
-64    -240   
256    -160   
384    -640   
224    -288   
160    -96    
-256   -528   
-64    -272   
384    -112   
-80    352    
-48    -160   
-224   -80    
-80    -16    
0      48     
144    -368   
96     -464   
-224   -704   
0      112    
288    32     
288    -800   
-768   -560   
176    192    
64     176    
48     -256   
-320   -208   
-224   208    
176    288    
64     128    
144    -224   
-288   0      
-208   80     
-32    -128   
480    32     
304    -784   
-512   96     
96     0      
32     -192   
80     64     
0      528    
192    128    
224    96     
-176   32     
32     -160   
-208   128    
512    -256   
-288   176    
240    -48    
128    128    
-928   128    
-288   1568   
2928   -192   
-1536  16     
208    64     
752    -208   
-480   -544   
368    112    
-176   128    
-192   496    
48     -16    
-240   -304   
352    96     
-80    176    
48     16     
-192   -144   
336    0      
-128   112    
-112   80     
48     80     
192    48     
16     336    
608    -448   
-1392  208    
1472   -464   
-704   144    
0      -16    
128    80     
64     -384   
576    -48    
-496   -544   
-128   48     
208    96     
-16    -320   
160    128    
-288   -352   
208    -608   
208    144    
-176   624    
544    240    
-112   0      
16     0      
-80    -272   
-16    -176   
-48    -96    
128    -144   
48     -288   
-256   -224   
720    -336   
352    -400   
-560   -256   
-48    -912   
-16    272    
96     -224   
304    -16    
-144   -1632  
-496   160    
96     160    
64     256    
400    -288   
-96    32     
-384   -544   
272    144    
432    -96    
-112   -320   
32     304    
-128   -192   
-496   48     
1120   -416   
48     -304   
-720   -848   
2528   -2512  
-224   32     
-496   80     
-352   -192   
144    528    
1072   -272   
-368   624    
192    -416   
-288   -32    
48     48     
32     112    
80     -560   
-16    144    
128    -96    
16     -48    
-160   -48    
96     16     
272    -64    
-544   -560   
-32    80     
-96    -112   
-208   160    
912    -48    
-128   -144   
-480   -224   
448    -80    
-864   -416   
208    -320   
64     -288   
192    -16    
64     -112   
-112   -288   
0      32     
-80    -2144  
368    0      
96     -96    
256    208    
-320   -16    
-432   -32    
240    -16    
-16    -32    
-208   -96    
-96    160    
144    32     
-64    -64    
80     -160   
-32    -416   
-48    96     
320    -128   
-256   112    
160    -48    
-80    -656   
48     -144   
-96    -16    
400    -544   
0      -176   
80     336    
-448   256    
-336   112    
48     -448   
-32    96     
32     -128   
-112   -16    
192    -128   
-48    32     
64     0      
176    -160   
-224   208    
-16    -240   
-16    64     
64     192    
-176   192    
-128   32     
64     96     
256    96     
0      240    
224    -496   
-192   -144   
96     -448   
240    288    
-320   -2384  
-1024  1072   
1024   32     
-656   1040   
688    -384   
-576   -304   
48     400    
-496   1136   
432    464    
-32    -128   
-160   -256   
-160   -192   
160    96     
192    -16    
-512   336    
336    -288   
-112   -96    
16     -176   
256    -80    
-240   288    
-400   -800   
576    -880   
-768   160    
1232   -304   
-544   -160   
-448   0      
-128   288    
144    272    
-272   -256   
-736   48     
-368   320    
-1488  336    
512    -144   
-80    -128   
16     192    
-176   -112   
16     -304   
256    -480   
-288   432    
-1472  144    
208    192    
-336   -176   
-96    -144   
-48    32     
-80    32     
-64    192    
16     64     
-176   16     
-224   144    
176    448    
-1136  -1504  
-176   -416   
-384   528    
-832   -112   
1472   224    
-112   112    
-480   32     
-160   224    
96     416    
-32    432    
-192   560    
160    272    
224    144    
-480   512    
192    432    
-368   192    
-336   -368   
272    -416   
96     -832   
-96    -448   
-64    -48    
384    928    
2016   0      
-1856  1040   
864    -80    
400    -320   
-64    320    
-512   1152   
192    -32    
-160   -608   
-624   -96    
256    160    
-192   80     
160    240    
-128   -128   
144    80     
64     -96    
176    1088   
608    480    
-368   -112   
256    -176   
-112   -176   
320    -80    
-320   576    
464    832    
64     -128   
-864   -384   
-112   -1088  
48     224    
-16    416    
272    496    
-80    0      
208    416    
-144   -208   
-1072  192    
208    272    
224    -400   
192    64     
480    128    
-592   288    
96     304    
64     -48    
-416   160    
48     -144   
64     192    
-208   480    
-464   640    
-128   0      
-16    -80    
64     -160   
1264   3120   
-1696  1120   
272    176    
1680   -336   
-816   128    
-784   128    
-192   -1200  
80     -1792  
576    1008   
-1472  -432   
-112   -352   
432    576    
144    -32    
-192   336    
-80    64     
-224   -32    
352    320    
144    352    
-48    544    
96     544    
-368   -256   
48     -208   
160    320    
352    48     
-736   -48    
-256   -160   
272    -496   
0      -32    
-48    -304   
-128   432    
-96    416    
224    96     
160    256    
-304   -48    
112    -192   
96     736    
-32    1312   
128    384    
496    1008   
-352   608    
-96    -112   
-128   -64    
192    400    
-48    -144   
176    -16    
-80    -112   
-272   288    
192    1312   
272    -784   
-64    -208   
-496   400    
-80    -512   
640    -384   
80     -608   
-816   -1136  
112    -736   
192    -16    
112    -896   
-80    128    
64     912    
-416   -400   
16     -880   
256    0      
-176   384    
32     112    
16     -176   
64     128    
-96    656    
-16    784    
256    448    
-160   -288   
128    64     
-64    -32    
-32    0      
288    1040   
-32    960    
-32    528    
320    288    
-704   -208   
-128   96     
-32    -608   
1376   368    
-512   112    
-288   -768   
-176   1424   
128    1072   
64     752    
-16    16     
-32    128    
16     -192   
-80    -256   
288    -176   
-96    -48    
-160   288    
-32    -224   
96     160    
-160   80     
-368   16     
176    128    
-64    96     
-16    48     
464    -336   
-656   976    
400    64     
-48    272    
-112   544    
-496   64     
240    384    
-176   592    
-240   -256   
80     -112   
128    -64    
32     -16    
64     128    
0      144    
128    112    
-64    -144   
32     176    
-96    128    
176    96     
-32    0      
-288   96     
384    192    
-128   0      
304    208    
-80    -48    
-432   256    
256    80     
64     32     
288    288    
1184   752    
-1984  304    
-16    560    
1504   176    
-624   144    
-816   -288   
304    224    
288    256    
-464   96     
160    112    
368    96     
-464   -384   
192    160    
-96    -368   
192    176    
64     48     
-176   -64    
288    320    
240    -96    
-128   224    
80     48     
400    1280   
-976   -496   
-112   48     
208    48     
-320   144    
240    240    
144    256    
0      48     
-48    288    
48     -80    
384    32     
-32    144    
16     112    
-80    160    
16     80     
-32    -16    
-48    160    
-64    -96    
80     -192   
-64    112    
208    -288   
320    192    
48     -176   
-608   -96    
1232   -672   
336    -320   
128    -224   
768    192    
-624   -16    
-96    128    
528    16     
16     -32    
-32    48     
-272   480    
-96    -80    
256    -208   
640    80     
-16    400    
-368   400    
-144   -816   
528    176    
-192   352    
-224   80     
112    -64    
208    -112   
-448   -64    
144    -48    
224    -16    
-144   -784   
1008   -4400  
-2864  -1456  
1744   32     
-144   448    
304    80     
-416   -640   
336    656    
544    -480   
-496   192    
-464   -48    
400    224    
128    -80    
-432   176    
176    16     
-80    -16    
304    176    
-32    -64    
48     16     
-336   -1728  
624    -688   
-144   -624   
288    48     
-272   48     
-496   32     
336    16     
-160   192    
16     -32    
112    192    
144    -32    
16     96     
-208   32     
288    -208   
0      128    
240    -64    
-176   400    
272    112    
112    160    
304    -464   
-144   -272   
16     -16    
352    160    
-48    160    
-80    304    
176    96     
-256   -64    
256    64     
112    -240   
128    160    
-512   -240   
416    -400   
112    -400   
96     112    
-944   256    
672    208    
-576   368    
496    -352   
16     -112   
-368   -1328  
-208   -1680  
176    -368   
112    -2112  
-48    -64    
48     80     
160    -64    
-144   -48    
-48    -160   
16     -80    
96     -112   
-16    -336   
240    352    
16     32     
-16    -112   
-928   -176   
32     -144   
-112   160    
128    448    
-48    64     
-48    -1072  
96     -688   
-112   -96    
0      32     
160    2048   
944    -304   
-1296  64     
704    -208   
-96    80     
336    -224   
-592   256    
-48    -400   
192    560    
96     -64    
128    -96    
0      -624   
16     -160   
112    -336   
-48    0      
0      -112   
-80    464    
0      -256   
-256   160    
96     -80    
-176   -832   
224    -624   
-480   144    
48     -240   
272    400    
-64    -912   
128    -112   
48     320    
128    -576   
144    304    
-16    -288   
-32    -240   
160    -320   
192    320    
96     64     
368    32     
-496   -224   
-256   -736   
-592   384    
176    160    
-112   -32    
-48    -64    
-240   48     
48     -432   
272    64     
-192   -1152  
-16    0      
16     48     
-112   -192   
-432   -1248  
1952   -688   
-1120  1024   
400    -576   
768    -112   
-864   720    
32     -160   
496    256    
-272   -304   
-48    -288   
-64    208    
288    -912   
96     256    
16     -320   
-240   -272   
80     64     
208    -96    
-288   -192   
336    240    
96     -16    
-48    32     
-1200  -1088  
-928   896    
1120   -848   
-432   -608   
-256   752    
112    240    
288    1216   
-928   -1232  
368    -1104  
240    576    
16     1312   
224    -336   
-144   -528   
-80    -32    
400    496    
-208   -96    
-304   48     
272    608    
0      -128   
304    336    
0      0      
-224   368    
-32    -16    
736    992    
-720   944    
-576   -720   
1120   -1200  
-352   -16    
512    -368   
-320   96     
-144   496    
480    64     
-880   352    
224    -816   
-336   -80    
96     -496   
-48    -736   
-1104  -1072  
560    -240   
-352   192    
272    -352   
-288   16     
-208   592    
224    592    
16     752    
240    -112   
-64    -496   
224    -544   
-1008  -432   
112    224    
-1376  1488   
656    -432   
-416   -80    
-464   -336   
352    976    
-160   896    
-128   992    
-256   -656   
-320   -224   
352    -304   
208    480    
-576   240    
-80    208    
16     -800   
288    208    
-240   336    
-112   48     
-16    320    
208    752    
48     80     
-368   -240   
48     -144   
-192   112    
-528   448    
672    384    
-208   704    
240    416    
-32    1120   
144    656    
48     224    
32     -816   
-496   -896   
-144   32     
192    384    
240    192    
-352   160    
-16    400    
-992   32     
-80    384    
144    -224   
32     -64    
-176   -208   
352    -128   
-624   -576   
192    -928   
272    -448   
-208   80     
-64    -624   
-16    -480   
128    112    
-128   64     
304    240    
480    864    
-432   576    
-384   -16    
176    256    
-144   144    
-352   192    
224    192    
96     928    
416    672    
-240   240    
-272   432    
272    128    
-16    -48    
-240   -496   
-144   544    
208    128    
16     816    
288    480    
-384   240    
-32    -16    
176    32     
16     64     
160    -208   
-624   -1040  
-96    -960   
496    -592   
-528   -384   
80     176    
736    -816   
-1472  1440   
1120   -192   
-288   144    
112    176    
-32    -64    
-704   368    
528    -144   
-400   352    
496    32     
-288   64     
-112   -192   
32     336    
96     -256   
-176   48     
32     -16    
16     -176   
-256   256    
176    80     
-96    -128   
-240   208    
-592   1072   
1888   -1248  
-1312  -128   
288    80     
448    -272   
-512   416    
480    -32    
96     608    
48     112    
-512   -16    
144    -64    
224    -128   
-64    16     
-64    32     
160    64     
-320   -16    
-352   64     
272    32     
-80    48     
-96    -16    
-304   240    
432    64     
-32    192    
-16    -32    
-432   112    
112    224    
80     -112   
-96    96     
-176   160    
-96    2400   
688    -368   
-544   0      
240    -464   
-656   -80    
272    240    
80     -80    
48     -64    
-48    144    
-512   48     
240    80     
288    80     
-16    48     
-288   -336   
-496   -48    
688    32     
-432   128    
416    48     
-256   64     
240    32     
-64    176    
-624   -800   
-112   352    
1168   -608   
-1808  -112   
1504   144    
-384   80     
-496   288    
320    320    
-384   -64    
320    32     
128    192    
-112   64     
-96    96     
0      48     
240    32     
-48    128    
-96    -176   
-256   80     
560    96     
-528   -64    
192    480    
-672   96     
416    64     
112    -112   
-112   -224   
-304   -240   
-112   48     
672    -288   
-576   -144   
160    0      
288    304    
64     448    
80     -16    
368    208    
-352   -112   
-496   -48    
-32    -432   
-416   272    
128    64     
-192   0      
368    48     
128    144    
-64    -32    
-256   144    
384    -176   
144    64     
192    176    
-352   -80    
848    1472   
-1936  4256   
1376   800    
-800   -560   
-816   -416   
1104   208    
272    -192   
-640   352    
0      -80    
624    400    
208    -96    
-368   64     
176    -48    
-240   128    
-48    -80    
256    304    
0      112    
-400   80     
352    0      
400    -592   
-624   976    
320    368    
48     -48    
48     -176   
336    176    
-176   -128   
-320   128    
800    240    
-720   192    
128    128    
112    256    
-320   0      
336    80     
0      -256   
96     -256   
-272   -80    
288    -528   
-64    -48    
224    0      
-112   -176   
-272   -80    
208    16     
-208   -304   
208    -400   
-192   -336   
-160   624    
16     1040   
560    -208   
-336   -752   
-16    -416   
48     -336   
-48    -1072  
0      -384   
272    -80    
-160   128    
-64    464    
160    -48    
128    -512   
192    -576   
-784   -416   
0      -192   
192    -224   
-32    -176   
80     -112   
48     -80    
-640   -128   
288    -1024  
352    -32    
-112   -832   
-336   -48    
96     304    
192    128    
112    -96    
0      -64    
-112   -48    
-96    -96    
16     -608   
96     144    
16     -576   
-208   272    
288    -144   
16     32     
176    768    
416    -48    
-448   -880   
-336   -896   
160    400    
704    496    
-704   480    
96     544    
48     224    
-144   432    
288    -416   
-80    224    
-192   -48    
240    -16    
336    80     
-144   256    
-208   -480   
-16    192    
48     -880   
-112   128    
160    576    
400    -16    
-416   272    
-352   944    
336    -144   
256    -336   
-16    256    
80     288    
-208   368    
-16    -320   
112    16     
240    -368   
32     256    
208    256    
-224   464    
80     576    
464    160    
-352   208    
-64    -144   
672    -32    
96     16     
-80    160    
-400   -240   
-32    48     
32     -192   
480    -96    
-320   -64    
-128   144    
336    -240   
160    -128   
832    -784   
-832   144    
960    512    
-96    -336   
-336   32     
-112   -384   
320    -672   
496    -432   
128    480    
-176   736    
192    144    
112    -528   
-112   48     
160    -400   
304    -800   
-160   -416   
-512   -832   
656    -416   
272    1008   
-128   -480   
-368   -720   
224    -512   
1328   -960   
-1104  784    
1152   304    
-512   -16    
-480   -1696  
-48    80     
848    1808   
-96    784    
336    608    
336    -144   
-448   -448   
-912   -256   
272    304    
208    -192   
-528   -736   
48     -368   
448    -768   
-80    -80    
96     96     
176    224    
-224   -32    
416    -192   
192    -1024  
320    -1072  
144    -784   
320    224    
144    272    
-160   -80    
176    352    
224    128    
-256   -656   
-176   -896   
320    240    
-704   -832   
-448   -2416  
-208   -544   
336    48     
-432   96     
448    -80    
-48    -240   
336    368    
48     208    
224    768    
176    224    
-176   -160   
48     496    
288    -160   
208    112    
128    -496   
880    288    
448    -288   
-1152  -656   
608    144    
-272   1216   
816    1424   
16     560    
-1168  -32    
464    -144   
0      -112   
208    16     
-608   96     
-80    176    
448    48     
48     -64    
-160   -112   
-496   -3088  
-32    -1056  
352    -624   
32     -304   
16     608    
-672   -224   
288    160    
416    -432   
-496   160    
256    -16    
-1264  176    
64     -320   
512    -112   
-176   -208   
224    112    
-480   -1728  
-208   64     
352    96     
80     -272   
-240   -544   
176    -80    
-16    32     
48     -64    
-208   -160   
224    -176   
-400   -160   
-224   -176   
304    -32    
176    656    
400    144    
-32    -816   
0      -112   
128    -208   
448    928    
-720   512    
16     -112   
-112   -144   
-64    0      
208    64     
-160   -112   
-432   -64    
288    -192   
96     0      
48     -32    
-48    368    
464    128    
-160   96     
-144   -16    
128    80     
32     112    
-272   -368   
464    -144   
-256   -32    
0      -240   
48     80     
16     -48    
0      -48    
256    -528   
-656   -32    
480    160    
16     -816   
160    272    
16     32     
416    2032   
2144   -80    
-1552  352    
208    -16    
144    48     
-272   -400   
16     -16    
-32    256    
-288   -192   
96     96     
272    -64    
-96    176    
-368   -304   
80     -192   
32     224    
-368   416    
-128   -208   
-1168  -240   
0      48     
16     64     
64     -1248  
-864   544    
880    -80    
-432   208    
528    80     
-80    -240   
-192   368    
-80    -96    
32     -64    
32     64     
80     -48    
-288   112    
-272   -32    
-176   240    
144    -176   
-336   48     
144    -192   
-144   128    
288    -160   
-192   -32    
48     -112   
80     0      
-64    80     
272    -64    
-624   -80    
592    96     
-272   16     
-64    -16    
64     48     
432    -784   
-624   -768   
-176   -304   
272    -48    
64     32     
-208   16     
0      16     
32     432    
48     48     
144    -32    
96     48     
-336   96     
32     144    
240    176    
-96    80     
-192   160    
320    80     
-640   -80    
128    208    
-32    -176   
-144   144    
640    688    
-448   -512   
-1616  240    
1488   144    
-864   32     
-464   96     
464    112    
-96    -240   
-576   80     
48     32     
400    32     
-800   16     
-176   144    
448    -192   
-384   96     
160    32     
-144   -64    
96     -80    
-64    -176   
-32    -16    
0      112    
-592   -336   
528    0      
256    240    
-608   -128   
128    128    
0      -32    
256    1136   
-96    -320   
-176   -48    
32     160    
-400   -16    
176    32     
-160   -48    
16     192    
-608   272    
160    128    
-128   -288   
256    0      
-192   -112   
144    48     
-240   -48    
-240   256    
-832   -16    
304    192    
-640   112    
-272   48     
96     64     
304    128    
1024   2048   
-1872  1408   
1744   128    
1040   -400   
-1280  16     
48     64     
-96    64     
432    -112   
32     80     
-1024  -112   
592    176    
-256   112    
112    192    
160    16     
-400   224    
-192   -208   
448    224    
-160   -128   
48     288    
384    416    
-272   -112   
-32    -176   
0      80     
560    160    
-464   -160   
304    128    
128    16     
-176   144    
352    -352   
-528   -192   
160    -160   
-96    256    
160    208    
-208   -16    
48     -544   
-416   -240   
368    48     
320    -1136  
-400   -608   
-240   -560   
16     -368   
-64    -304   
32     -32    
80     80     
-400   -352   
-336   -400   
-176   -688   
384    656    
-48    -272   
-352   -576   
112    -240   
288    768    
-1040  544    
736    976    
-336   944    
352    336    
320    656    
-192   1840   
-96    464    
48     -592   
-96    64     
128    128    
-32    240    
-16    -272   
16     560    
112    288    
-208   -240   
192    -112   
320    -208   
-80    432    
-112   -48    
128    80     
48     80     
16     96     
-96    464    
128    112    
48     -48    
-144   -128   
0      144    
96     240    
-176   32     
16     96     
336    -240   
-432   256    
704    32     
-288   -224   
-240   208    
80     -176   
64     272    
160    80     
-32    -32    
-144   32     
-32    160    
32     32     
304    112    
-528   48     
416    144    
-384   64     
144    80     
-32    128    
64     0      
32     -208   
-304   464    
32     272    
-128   256    
416    112    
48     -128   
-128   -272   
-176   80     
32     -32    
240    16     
-192   48     
-128   64     
208    16     
-32    16     
-240   240    
336    96     
224    -80    
-272   -304   
96     272    
192    112    
0      -192   
-32    -128   
64     -272   
144    96     
16     -368   
-144   -336   
-16    288    
-208   -416   
-80    368    
320    416    
-1312  1504   
2944   -384   
-560   -176   
-864   544    
672    400    
144    192    
-720   464    
-576   -1456  
352    384    
-272   336    
208    -384   
176    128    
-304   -576   
192    0      
288    32     
-288   -16    
0      480    
-48    144    
208    -640   
-80    -336   
528    560    
-1712  1008   
640    -144   
96     -720   
-672   -512   
592    -496   
-128   800    
-128   -1216  
-688   32     
656    -80    
-176   576    
0      112    
112    400    
-288   256    
96     -128   
32     -192   
32     336    
32     -320   
-288   -256   
-16    -480   
192    -384   
-144   -48    
-384   -736   
320    896    
272    -80    
-176   224    
-928   64     
400    240    
-384   352    
368    208    
-288   -80    
-240   -48    
192    176    
400    112    
-224   704    
496    -256   
-64    -144   
656    288    
-96    -208   
-208   -176   
224    176    
-272   -1168  
480    800    
-480   256    
112    160    
-176   -32    
-224   160    
304    32     
-416   -896   
-240   -1056  
832    64     
752    -144   
-960   -32    
-784   0      
176    -960   
1024   -32    
-656   32     
208    240    
-576   272    
800    192    
-192   -80    
0      144    
112    272    
-480   -352   
640    128    
0      -192   
-32    64     
160    -272   
-384   1136   
704    1296   
-192   560    
-64    -832   
464    48     
-48    -176   
-16    48     
160    -48    
0      192    
192    -320   
-32    -16    
32     96     
256    80     
32     352    
-304   -304   
416    80     
-416   -176   
416    64     
-512   -16    
208    -272   
-208   96     
64     -448   
96     -32    
-32    32     
-176   -144   
304    128    
-176   -752   
480    -336   
-544   -16    
160    -96    
96     512    
272    160    
-208   -80    
-272   -944   
-80    -496   
16     208    
336    -144   
-192   -240   
-976   -400   
-96    -352   
-96    -272   
-176   -128   
288    0      
-32    -336   
48     -384   
-32    -48    
16     -336   
-48    -192   
-16    544    
512    464    
-32    -192   
-640   192    
512    80     
-464   64     
32     -48    
192    -48    
-112   -80    
144    -320   
16     448    
-96    -176   
112    -3168  
64     192    
1216   3056   
-2480  -368   
-96    -32    
1632   -224   
-848   -368   
-16    16     
80     96     
224    80     
-16    48     
272    -256   
-256   352    
-16    -208   
208    -16    
112    -528   
-128   -192   
112    208    
-112   192    
32     -288   
112    -48    
-64    96     
-432   -352   
1120   496    
-144   -144   
-1312  -272   
528    -304   
160    -96    
-304   96     
208    -112   
368    -576   
-352   304    
224    -1680  
80     64     
320    -288   
-128   208    
80     64     
-48    112    
-176   352    
272    -112   
-544   96     
464    -32    
-928   -48    
-16    0      
160    16     
224    -336   
96     48     
176    -1008  
-304   208    
160    32     
112    32     
-16    128    
-464   -208   
368    864    
-608   640    
-368   -160   
48     16     
80     -64    
-64    -544   
192    -400   
-240   -288   
-224   96     
208    -80    
80     80     
-64    0      
128    96     
-64    48     
-352   160    
432    -32    
-336   0      
-16    -352   
176    -160   
-160   -64    
224    -480   
-1392  368    
1120   144    
-416   288    
-272   -384   
608    32     
-368   144    
-352   -160   
-448   96     
560    -32    
-128   32     
-16    32     
-144   48     
16     -160   
-384   96     
352    -80    
-48    304    
-48    96     
288    -16    
160    -240   
128    80     
-160   224    
1312   -144   
-1360  272    
400    -96    
64     16     
-288   -384   
304    352    
-304   32     
-304   0      
64     64     
224    -64    
-320   -16    
-288   512    
-208   288    
160    256    
-272   32     
-224   -192   
-304   -96    
-928   -48    
144    0      
336    -288   
-688   304    
448    80     
80     576    
-304   -464   
-304   224    
-320   -336   
592    1344   
1952   3696   
-2624  2352   
1264   -688   
576    -768   
-640   -32    
-320   208    
272    672    
-48    432    
48     320    
64     -64    
-64    368    
-240   -48    
112    192    
160    -128   
-208   -32    
112    32     
-192   -160   
-96    -80    
-128   32     
448    64     
-416   -560   
-208   -336   
-656   -512   
48     112    
-304   -624   
-224   -32    
608    240    
-352   -304   
-80    -1264  
-128   -352   
144    96     
-128   -16    
144    -192   
-96    0      
-144   96     
112    368    
-80    304    
-336   128    
-80    -256   
-432   -512   
-48    512    
304    64     
144    -144   
304    752    
-608   32     
-128   -272   
352    -16    
0      -480   
96     32     
-192   400    
112    -256   
528    928    
-960   -944   
-304   -304   
384    -464   
-864   192    
128    -544   
-112   -112   
224    864    
80     -576   
-240   -80    
64     112    
112    80     
-96    576    
-16    752    
208    -208   
32     192    
96     -16    
-384   -48    
-224   0      
64     80     
-48    -128   
-208   64     
-16    48     
-32    112    
-16    32     
-160   -112   
464    -96    
-240   112    
-64    96     
128    -16    
528    -80    
-1584  176    
320    144    
-432   -64    
544    -16    
-496   -96    
192    208    
-64    480    
16     -208   
0      -160   
-16    224    
-240   256    
-32    192    
-96    144    
32     -112   
64     -32    
-544   -32    
224    192    
160    -80    
-32    -32    
0      -208   
-528   192    
128    432    
96     64     
80     176    
-80    80     
-224   0      
64     -48    
256    -48    
-208   -160   
64     240    
-320   -48    
144    144    
-32    -224   
-128   96     
64     -96    
-176   224    
-144   -288   
160    976    
-96    608    
-176   0      
288    80     
-96    16     
-224   320    
-176   -80    
-64    16     
304    -176   
-288   -80    
-80    16     
-336   32     
992    -128   
1008   448    
-1040  96     
432    -112   
528    -80    
288    176    
192    -528   
-160   1472   
-160   784    
-32    720    
672    -304   
-96    -128   
-320   128    
-160   384    
480    272    
-128   288    
-176   592    
288    32     
208    0      
-208   -256   
528    -272   
-1984  992    
1520   352    
-1408  -848   
336    -1584  
48     -224   
-704   -144   
1280   -32    
-352   288    
-80    240    
224    96     
-176   0      
208    560    
-512   272    
-112   32     
288    16     
-48    368    
-320   -80    
96     64     
32     336    
480    256    
-64    80     
-992   448    
1104   -176   
-64    304    
-16    96     
240    -192   
-256   80     
-80    224    
32     -224   
480    -112   
-32    208    
96     256    
-352   192    
-288   -16    
512    640    
432    -384   
624    -608   
16     128    
-48    144    
64     240    
16     48     
-96    -64    
-16    144    
160    112    
-352   80     
-128   80     
16     64     
240    464    
64     1936   
-704   240    
720    -160   
1648   -320   
-1024  368    
-464   336    
320    224    
304    -80    
128    -48    
-64    16     
320    288    
-96    -48    
256    208    
-160   -144   
16     288    
112    -336   
-368   192    
-112   -80    
64     -1248  
1040   -304   
-592   -464   
80     192    
240    416    
-384   64     
-96    0      
592    128    
-272   -272   
-432   224    
336    -96    
192    176    
128    -16    
-288   96     
96     240    
512    -16    
-640   48     
416    -240   
-208   80     
752    288    
-304   -224   
-592   160    
624    0      
-272   -272   
496    16     
-256   -80    
-160   160    
96     -96    
-256   0      
368    80     
-592   -144   
288    224    
416    -288   
-368   -416   
560    -1056  
-336   48     
688    192    
-16    336    
-544   -288   
-144   -32    
224    -48    
160    32     
-80    -144   
-192   -176   
80     112    
240    -368   
-144   208    
128    -528   
144    -464   
-80    -1168  
192    -144   
-816   384    
592    64     
-240   -64    
208    0      
-48    48     
96     208    
-48    -16    
-32    320    
224    288    
-336   -448   
224    -48    
176    -64    
-672   448    
2208   -2448  
-1488  96     
64     -1984  
704    272    
-256   -720   
-336   160    
352    992    
-624   256    
432    -208   
384    -272   
-368   -96    
-112   -192   
176    464    
368    -944   
-144   -80    
-64    -192   
-112   240    
128    16     
224    48     
-16    -1056  
-864   864    
624    -176   
-368   -496   
528    32     
-32    -32    
-432   -400   
128    -128   
320    400    
-128   -48    
48     96     
96     -96    
-304   32     
336    -240   
-64    112    
-176   -208   
272    -1936  
-272   -576   
128    -176   
-32    -736   
-48    0      
-64    -144   
320    -144   
-128   80     
144    -368   
-336   112    
448    -112   
-48    256    
-160   192    
-496   -1920  
2704   784    
-1952  -624   
-1344  -1472  
1792   -320   
48     -720   
-1008  32     
704    -2608  
-32    -576   
-96    -688   
112    240    
0      176    
48     -64    
48     -768   
-64    432    
752    -240   
-592   160    
176    -208   
-112   -16    
-720   208    
112    240    
-112   -176   
608    -176   
-1440  -240   
1424   -336   
336    160    
-320   448    
-48    -32    
288    -656   
176    208    
-112   -160   
-400   160    
-240   64     
800    -320   
-400   -160   
416    -256   
-528   64     
304    -48    
224    -656   
-192   16     
192    64     
-64    -2208  
144    336    
-384   -128   
-272   -288   
-96    432    
464    -432   
800    160    
-432   -160   
272    256    
-416   32     
-480   -112   
128    -208   
16     160    
64     64     
96     432    
-704   -608   
80     -416   
832    -288   
-368   192    
-224   112    
624    16     
-192   208    
-128   -336   
64     32     
32     -64    
-176   -304   
-160   0      
288    -432   
-96    -16    
-32    240    
-816   2144   
400    288    
-224   -1952  
-400   -144   
1216   640    
-256   656    
-896   -16    
560    1696   
-96    1216   
-128   -464   
96     96     
-352   16     
-48    16     
-96    -224   
192    -304   
-16    -448   
-368   -176   
288    -1616  
-16    192    
-96    -128   
96     -48    
-32    96     
-336   -656   
32     96     
256    -288   
-128   864    
272    64     
-464   -112   
192    -528   
80     -64    
80     -384   
-256   176    
208    192    
160    1088   
432    416    
-160   -496   
-208   -240   
-96    -432   
144    496    
224    448    
-224   -96    
-80    -96    
-336   288    
256    160    
-320   112    
240    -288   
-224   -256   
96     96     
336    304    
-496   -32    
-96    -32    
560    -720   
-512   464    
-16    64     
-400   -96    
128    -960   
-96    368    
-1040  1632   
-80    -176   
64     -672   
128    128    
-96    240    
-800   -784   
240    -448   
128    32     
-224   160    
-208   304    
-128   288    
-176   -80    
160    -16    
-64    -64    
16     0      
-304   112    
112    -192   
176    -144   
-640   -224   
352    208    
-320   112    
-80    176    
144    144    
-304   80     
32     704    
64     160    
-192   -64    
-160   304    
96     256    
-32    384    
320    384    
-64    592    
-176   336    
32     -400   
224    -144   
0      -80    
-208   288    
112    176    
-176   96     
-32    -208   
-80    -304   
144    -160   
-96    -48    
496    480    
-960   464    
448    -272   
432    128    
-432   736    
-128   -224   
-128   -368   
-48    336    
288    368    
160    -224   
-576   -64    
-64    240    
0      208    
336    -112   
-1184  -352   
-624   -416   
-96    352    
336    -240   
320    368    
-272   -256   
-240   240    
-80    -304   
288    48     
256    -512   
-288   -80    
-160   16     
160    96     
352    -32    
-320   -192   
160    -768   
-1104  -1328  
-416   112    
384    64     
-624   144    
816    240    
-544   416    
368    240    
-336   672    
0      352    
-96    192    
400    208    
-192   112    
-288   -128   
176    384    
272    128    
-48    192    
-592   240    
240    480    
-80    16     
32     -64    
-48    96     
-304   -816   
-464   256    
624    -320   
112    -128   
-512   32     
320    -176   
-32    -448   
-976   288    
704    0      
-160   16     
-272   80     
160    112    
-448   -160   
224    192    
96     64     
-80    64     
48     272    
-112   -80    
448    -64    
16     80     
144    672    
-816   112    
224    64     
-80    576    
16     432    
80     1008   
-752   688    
-720   -976   
512    -544   
576    144    
-672   192    
96     304    
416    96     
-112   -864   
336    -656   
-544   -80    
-32    64     
704    -80    
-336   208    
-544   112    
-352   32     
608    -64    
-224   96     
-288   -32    
-16    528    
528    -224   
-336   64     
96     64     
-416   -1296  
-2112  -2544  
-144   -560   
448    192    
176    224    
224    48     
-96    352    
-576   -112   
128    -48    
560    496    
-624   80     
368    32     
112    128    
-304   96     
80     240    
48     128    
112    -144   
-144   48     
0      -32    
416    576    
-912   192    
480    624    
480    -240   
-672   16     
-432   -112   
-272   0      
464    224    
16     176    
-16    -32    
-160   48     
144    128    
128    32     
144    304    
-224   48     
-48    240    
-352   -336   
320    400    
-16    -64    
-464   32     
880    -192   
-352   48     
304    192    
-320   144    
0      80     
272    -32    
-80    112    
48     -288   
-544   -528   
336    -128   
48     112    
208    240    
-192   224    
352    1328   
-656   560    
192    144    
128    -64    
-432   -16    
112    480    
448    112    
96     208    
-192   192    
64     64     
128    0      
-160   -64    
64     64     
-48    32     
0      -80    
64     48     
-64    -80    
112    -96    
-272   192    
304    464    
432    -80    
-256   -208   
-176   192    
112    352    
192    112    
128    224    
-304   -80    
0      288    
32     112    
-160   -240   
1472   2736   
1264   -176   
-2016  624    
928    96     
48     0      
-80    192    
-16    112    
-80    -192   
400    -608   
-288   448    
288    176    
16     -128   
-64    176    
80     -448   
144    -1024  
-224   192    
192    0      
-80    112    
32     448    
224    112    
-16    -1040  
-336   624    
384    64     
-784   -304   
576    0      
160    224    
160    784    
-304   608    
176    -80    
144    -112   
-16    -16    
-80    -96    
-48    336    
384    -32    
-400   144    
64     32     
-80    192    
80     80     
16     320    
64     -32    
-80    -48    
-64    -112   
-32    -256   
64     -32    
256    -208   
-432   -64    
352    -1056  
-128   272    
-16    96     
-560   128    
1472   16     
1360   160    
-1648  208    
736    -112   
32     -352   
-144   -48    
240    -16    
160    240    
-112   128    
-208   192    
288    128    
320    -464   
-240   -32    
-96    -912   
256    176    
16     48     
-160   80     
16     -48    
304    128    
0      80     
416    752    
-1840  528    
528    336    
-96    224    
0      -464   
48     112    
16     -448   
592    624    
128    -128   
-224   -704   
-320   -320   
80     96     
112    -96    
32     144    
224    208    
16     112    
-144   592    
192    -240   
-32    -32    
192    -96    
-128   320    
-16    96     
112    352    
-176   80     
416    768    
-528   -1936  
-736   -2064  
-80    -1440  
336    -752   
-736   -208   
256    32     
-112   160    
144    -848   
384    208    
384    112    
-336   496    
384    -1008  
-112   208    
336    -272   
80     -192   
-48    -208   
0      192    
32     160    
160    256    
-176   -160   
416    -1328  
-16    -16    
208    -16    
48     -144   
-48    112    
992    800    
-2464  -800   
672    960    
1168   -672   
-816   -336   
256    64     
-256   -96    
480    -160   
144    -560   
48     -1296  
-112   192    
0      -1136  
368    -96    
112    -464   
64     -752   
-320   560    
240    16     
-192   -48    
-48    -128   
224    -976   
-128   -688   
272    128    
-608   -176   
64     32     
848    192    
-288   -864   
-32    -416   
-144   -416   
-256   -672   
240    -48    
112    -512   
-128   528    
-64    208    
192    272    
448    -480   
-224   -176   
-80    -864   
256    240    
0      384    
48     -48    
-768   -48    
-320   352    
304    32     
80     128    
112    896    
-48    128    
240    -144   
176    1552   
16     -384   
112    0      
-256   -400   
496    512    
-64    32     
-288   0      
96     -432   
-1136  -48    
64     -288   
208    176    
96     -32    
-240   -192   
-32    -432   
160    -176   
192    -2656  
-288   16     
96     -160   
32     240    
-16    128    
48     -80    
-800   240    
48     0      
-512   -192   
256    128    
240    112    
32     432    
144    -384   
-368   -1312  
288    -624   
-208   -1152  
-48    -144   
160    -32    
-176   -944   
1264   -1088  
-160   560    
208    304    
-144   432    
-128   512    
224    400    
-480   -48    
352    -800   
-304   -480   
-112   256    
96     272    
272    -896   
-16    432    
-176   -736   
208    64     
-192   -208   
224    -80    
64     112    
-272   160    
-464   -608   
1040   -672   
-528   752    
160    -560   
-528   -896   
480    64     
-32    480    
272    -656   
-176   -32    
-192   -656   
160    368    
272    80     
-32    -96    
-288   -384   
80     -256   
-32    -64    
272    -48    
-400   128    
144    0      
-176   -96    
128    -272   
176    96     
144    -432   
-80    352    
256    96     
-320   -80    
-16    16     
240    -32    
-336   -160   
336    112    
-1120  -208   
368    368    
368    176    
-1120  -320   
1024   384    
352    -576   
-768   -96    
480    -704   
-112   192    
48     -352   
32     80     
-48    -32    
-48    -128   
-16    96     
448    160    
-416   16     
272    -160   
-64    -96    
32     -320   
-608   48     
192    -128   
288    672    
-1840  -368   
352    288    
432    -128   
-1088  -48    
592    144    
-352   -208   
368    304    
240    176    
-352   -48    
432    32     
-368   128    
-208   -112   
-48    112    
384    16     
-32    160    
-112   -256   
368    112    
-560   80     
-128   112    
336    736    
-1072  128    
160    -352   
-96    272    
-64    -192   
160    -688   
384    192    
208    -784   
-16    -240   
496    -16    
-288   208    
80     80     
48     272    
-400   -336   
64     96     
256    496    
128    176    
224    544    
-592   64     
-752   16     
-576   128    
208    -64    
224    -304   
-576   -128   
80     -256   
96     -256   
-592   -176   
-16    96     
-416   -1360  
-1808  448    
784    976    
-896   -320   
48     -272   
496    128    
-48    464    
-1200  -96    
-240   -192   
1344   224    
176    0      
-352   -16    
-80    128    
208    288    
96     32     
-16    160    
-400   -160   
0      128    
112    -32    
272    448    
-144   -272   
-448   576    
608    -352   
-576   208    
384    -32    
-512   0      
224    384    
384    48     
-592   288    
592    -176   
-32    144    
-80    16     
16     224    
-144   -16    
-32    144    
432    -96    
-672   -32    
224    -288   
-16    32     
-320   -144   
96     192    
0      -208   
208    -176   
-16    -32    
96     336    
304    160    
-848   -80    
512    -80    
-144   -128   
-176   -16    
16     -144   
-160   48     
-112   -832   
-608   80     
416    432    
-400   176    
16     -48    
64     32     
-208   -32    
144    -208   
-32    64     
-32    112    
-16    96     
-208   -32    
176    -32    
-160   -144   
112    128    
-352   -112   
128    224    
-192   144    
-304   544    
240    80     
16     0      
80     -304   
-160   224    
-48    -224   
32     -112   
112    64     
-288   496    
336    512    
-16    432    
96     1168   
-976   -2240  
-992   688    
2336   -256   
-1424  1056   
-16    -32    
112    128    
560    -32    
-288   -224   
-176   -32    
32     336    
224    0      
240    32     
-96    -192   
-192   96     
80     80     
-240   -496   
144    -16    
-144   128    
96     224    
-240   -64    
496    -656   
96     288    
-224   480    
272    736    
0      592    
-304   -656   
112    -272   
64     576    
-112   16     
-64    80     
-48    -256   
-96    0      
176    48     
-64    304    
-192   -272   
176    -128   
224    272    
-32    96     
96     464    
80     -224   
-16    176    
32     32     
96     -32    
-112   48     
192    -80    
-224   -112   
0      448    
-48    112    
304    -208   
736    -880   
-2656  352    
1136   16     
-176   -464   
-1056  -96    
432    80     
-720   96     
192    2496   
192    608    
-112   -304   
336    -96    
-240   -96    
112    0      
-16    144    
-48    272    
352    208    
-80    128    
-80    880    
384    416    
-256   -368   
-208   -448   
1136   1152   
416    -112   
-1120  -752   
272    -288   
192    976    
-336   1536   
592    1552   
16     272    
-240   -944   
-224   -624   
384    128    
-48    400    
-112   208    
112    -192   
0      -144   
-48    0      
32     -512   
-544   -1056  
-32    -1008  
64     160    
160    128    
128    -112   
-560   -944   
48     -336   
192    480    
80     304    
-208   144    
496    1344   
-112   1632   
-368   -128   
736    48     
-224   496    
-496   160    
640    -48    
544    656    
336    640    
-416   624    
-432   304    
560    224    
-432   288    
416    432    
16     368    
48     -400   
48     608    
-48    96     
-288   544    
720    -16    
-320   848    
-304   160    
-224   -1248  
2208   -1280  
272    -512   
-944   2000   
480    752    
-432   496    
384    -576   
208    336    
-240   1648   
-464   0      
-240   -192   
528    128    
-16    -48    
-48    720    
-128   -80    
-80    -64    
-32    320    
144    -224   
48     -160   
96     -512   
-128   208    
64     -48    
32     -16    
-176   576    
592    368    
-592   480    
608    64     
160    352    
48     1056   
-112   -496   
-96    -624   
240    96     
320    240    
-288   -160   
112    -1024  
0      160    
-96    80     
192    752    
48     448    
-304   -544   
-64    -432   
416    240    
-32    256    
0      288    
320    832    
96     832    
-160   -80    
288    -656   
-96    -624   
64     -384   
16     672    
272    -1088  
-976   -560   
528    336    
416    -224   
-464   -288   
304    176    
272    -496   
-192   -1136  
-160   -80    
160    64     
-32    576    
160    224    
80     272    
-208   -64    
144    -112   
160    -64    
-192   160    
368    -816   
176    -16    
-176   -112   
336    -96    
-192   32     
-32    -320   
80     16     
-80    240    
288    160    
-96    -16    
144    80     
-32    -288   
-192   272    
784    1680   
656    256    
-720   1056   
672    -16    
-448   -368   
192    -160   
-32    -304   
272    64     
-464   512    
160    208    
368    16     
-64    32     
-32    -48    
64     -720   
144    -48    
176    -112   
336    816    
-368   656    
-96    -1024  
192    -16    
176    -2064  
-192   -1520  
176    112    
-608   352    
704    144    
-208   -656   
256    -448   
-128   -16    
-48    -288   
304    -112   
-48    112    
-32    -176   
112    96     
16     -816   
0      0      
304    -368   
-224   -96    
192    -48    
-208   -192   
608    -288   
-416   -160   
240    -32    
-144   160    
288    288    
224    208    
-704   64     
288    0      
80     -16    
-112   -528   
-704   -1904  
3200   1632   
576    -608   
-2496  -224   
752    -656   
1168   48     
-1360  -1136  
-112   592    
960    -832   
-560   64     
-64    -128   
64     112    
368    -144   
96     224    
-144   112    
0      192    
64     64     
-160   -208   
-784   -96    
304    -304   
144    176    
-192   48     
352    144    
1776   -448   
-1232  432    
-704   -1776  
624    144    
-80    -336   
-272   16     
224    -256   
32     160    
16     -112   
-192   -96    
0      32     
-48    -320   
-208   64     
384    32     
-448   -496   
304    -720   
-336   -240   
-160   -208   
16     64     
208    528    
-976   -80    
928    128    
-352   -272   
-240   -96    
96     -160   
-208   224    
272    -208   
-496   384    
-64    -16    
80     -112   
240    -400   
128    -16    
144    -112   
-176   896    
128    -784   
512    -656   
48     288    
-64    304    
64     -64    
208    -32    
0      -48    
-96    0      
-288   -32    
384    -688   
-832   48     
624    -112   
144    208    
-1376  -2480  
608    -384   
1360   -2320  
-1488  528    
736    256    
-448   -336   
208    272    
416    -80    
48     176    
-800   -176   
-16    144    
512    -160   
16     96     
16     -144   
-480   144    
416    -400   
-288   272    
480    -240   
-480   -128   
416    528    
-912   208    
448    544    
80     -256   
-352   -64    
704    64     
-400   96     
320    176    
-224   112    
64     -80    
192    -32    
-208   0      
160    16     
-80    -240   
208    -128   
-96    -144   
0      -208   
-128   -272   
208    -272   
48     -240   
128    176    
32     224    
-64    -192   
-704   224    
-224   -400   
224    -256   
-320   -320   
-128   64     
-80    112    
-624   -160   
176    96     
-448   32     
-32    64     
-48    -944   
-160   -32    
160    224    
-816   160    
624    -240   
176    160    
160    784    
192    800    
-128   -112   
192    288    
-160   80     
-112   -160   
-96    -272   
-144   48     
80     320    
-496   -80    
0      32     
-48    -32    
-112   368    
-272   -128   
-112   -1312  
272    -704   
-144   480    
-464   -160   
368    -448   
-80    -432   
0      464    
-192   1056   
288    0      
-320   -672   
816    -304   
-816   432    
-848   -832   
416    -432   
-144   -144   
448    1360   
-464   144    
400    -144   
-272   688    
112    -80    
208    -32    
-256   128    
-256   -16    
64     48     
-80    208    
-208   368    
-64    -32    
48     128    
-80    256    
-192   -400   
800    -336   
-192   48     
-448   -832   
224    -208   
-128   400    
592    144    
-864   -656   
-112   -96    
0      16     
0      -256   
-16    224    
-112   -608   
-224   144    
288    -432   
-640   -176   
224    16     
-384   272    
-160   288    
432    -512   
112    -224   
-320   240    
-32    160    
16     176    
-128   80     
224    -64    
-384   288    
208    -144   
48     -352   
-288   304    
-352   0      
2096   -176   
-1968  1344   
320    -176   
816    -784   
-864   -208   
288    -544   
720    -368   
-288   96     
-160   128    
240    160    
112    288    
112    -48    
-64    -64    
-320   112    
-304   -128   
224    16     
-192   -304   
-544   -16    
64     144    
80     128    
-736   880    
2016   -736   
-864   1376   
400    864    
-160   384    
-208   -304   
480    -624   
-208   160    
192    1440   
-16    448    
-160   -640   
16     -304   
96     544    
-32    -432   
-128   -496   
352    -64    
-400   240    
640    -240   
-176   64     
-16    -112   
64     96     
-432   -512   
224    -560   
576    -512   
-464   -832   
-208   -96    
-592   -2304  
-624   -1488  
432    -752   
-400   128    
144    464    
448    208    
-96    560    
-368   -1120  
-112   96     
64     176    
-496   -80    
496    -96    
-272   -496   
-256   -464   
336    96     
-32    432    
16     416    
-80    -48    
400    0      
-256   -128   
96     304    
-224   -32    
-112   256    
-544   -1408  
1248   -1424  
1040   528    
-1040  832    
-48    672    
208    -112   
672    -176   
-64    -784   
-960   -1568  
208    -352   
432    864    
240    336    
-80    -336   
-480   368    
208    -336   
624    448    
-272   224    
-240   -144   
-288   -496   
592    -672   
112    400    
-96    496    
-80    576    
-240   -16    
-16    288    
352    192    
-240   384    
-48    1040   
0      416    
0      352    
208    240    
-48    0      
48     96     
256    240    
0      704    
112    160    
-208   -368   
272    320    
-48    464    
32     208    
112    -288   
-176   -96    
32     80     
16     192    
-64    96     
64     848    
288    544    
32     192    
-256   512    
384    944    
-48    512    
272    336    
208    -240   
-1024  -32    
576    -192   
80     80     
-144   16     
320    -16    
-160   -272   
352    -368   
-192   -144   
-96    -16    
160    128    
48     -416   
-112   -512   
48     96     
-48    608    
144    96     
-128   272    
384    -96    
-64    320    
96     48     
-16    64     
112    -80    
-208   80     
-96    240    
288    96     
368    320    
-416   48     
-16    -720   
176    0      
-784   608    
2048   -992   
-1312  256    
-32    -176   
336    272    
256    16     
-384   0      
32     64     
416    -48    
-176   192    
96     -16    
-80    -160   
-160   160    
192    -672   
96     -16    
496    -288   
-176   96     
-192   -144   
304    -320   
-64    80     
1040   1088   
-1728  640    
656    16     
176    -144   
-576   -96    
512    -160   
-336   208    
160    32     
-32    64     
416    0      
-192   -144   
-16    208    
16     -32    
112    80     
96     -496   
16     -80    
-208   -256   
160    96     
-192   128    
432    224    
-80    64     
-128   -128   
-48    64     
48     48     
224    16     
-432   -160   
752    0      
-640   -416   
288    144    
-144   -656   
704    -544   
304    560    
160    320    
-448   -240   
800    496    
-464   -16    
-512   224    
384    96     
-32    -336   
-48    48     
-96    -528   
272    112    
-256   -128   
176    176    
496    176    
-352   144    
-176   48     
480    96     
96     -16    
-48    48     
112    208    
-624   -112   
2032   -16    
-880   -240   
-208   720    
2096   -144   
-1168  96     
656    64     
128    304    
-304   -128   
208    160    
-176   160    
128    16     
-32    96     
208    -128   
368    48     
-176   -240   
32     -32    
16     -608   
-96    -32    
-80    -32    
464    1024   
-1328  -512   
240    240    
448    -368   
-688   80     
608    352    
544    800    
-400   -176   
-32    -224   
-64    128    
-48    256    
96     160    
-96    -80    
-496   -112   
672    -320   
32     448    
-80    96     
400    336    
-512   160    
512    -1072  
-160   80     
0      -1392  
160    -1296  
32     128    
-464   -400   
-48    0      
160    -752   
-224   -192   
-816   -3024  
1792   -2560  
-224   1024   
-1344  400    
432    96     
-32    -16    
256    -512   
-176   384    
-80    -208   
-368   -608   
-96    80     
304    -304   
-304   -160   
352    -800   
-320   -336   
192    672    
-208   48     
256    48     
112    -16    
-112   -1216  
-800   -1552  
256    -1024  
-32    16     
160    224    
512    -16    
-2176  -16    
688    -240   
-320   16     
144    -320   
400    400    
-416   336    
320    176    
128    208    
16     16     
48     -64    
48     32     
48     -656   
-560   -576   
256    0      
0      -64    
-592   32     
-112   -240   
64     848    
496    96     
-256   -240   
-48    -496   
144    -576   
-496   -2816  
208    -16    
-352   -256   
64     -576   
32     -208   
144    864    
384    -304   
-304   48     
112    -160   
-512   -576   
-432   -1776  
16     -784   
208    -192   
-176   -288   
32     48     
-176   -1712  
32     192    
160    -144   
64     48     
-112   208    
-48    320    
-96    -304   
160    -144   
128    208    
-32    400    
-400   -576   
32     -272   
-240   -176   
-80    -256   
32     96     
64     -128   
64     240    
-192   -656   
208    48     
192    128    
-128   1008   
288    240    
-320   -192   
-176   0      
80     16     
-176   64     
96     -224   
112    -384   
464    -592   
144    -80    
144    -80    
-32    144    
128    -432   
64     -320   
-16    -128   
304    352    
-288   -112   
-128   -16    
-560   112    
-304   -512   
1488   -784   
-384   576    
-272   -144   
176    -416   
-64    384    
96     -64    
192    -240   
208    -384   
-416   160    
0      -32    
320    80     
80     -208   
160    288    
-624   -192   
48     96     
144    -96    
176    96     
96     -32    
-64    -352   
112    -64    
672    -224   
112    336    
-208   128    
176    224    
-240   160    
80     -32    
336    -80    
-48    16     
-224   16     
1680   1344   
-1984  1152   
-496   -304   
1408   16     
-1280  -608   
-880   -608   
224    -80    
-992   -1632  
160    -1392  
-32    -784   
80     208    
-512   640    
48     -864   
112    608    
-144   -544   
-96    384    
0      112    
-352   128    
-16    -336   
64     112    
-128   -144   
256    1072   
1280   -96    
-1328  -416   
480    -992   
-256   -32    
-96    1392   
576    464    
-496   -1088  
-400   -1968  
272    -352   
-128   -112   
0      48     
-176   -96    
-80    96     
-16    160    
-192   320    
112    1184   
-432   912    
192    640    
320    256    
-96    80     
32     -48    
-640   960    
304    208    
-976   -544   
224    -448   
-368   1104   
1104   -128   
-352   -32    
-320   -368   
464    368    
-176   -96    
304    112    
208    944    
-608   0      
-240   288    
256    768    
-240   -320   
224    848    
-1168  368    
144    32     
640    96     
-592   160    
-384   -304   
-416   -704   
448    64     
304    256    
-1024  -544   
32     -400   
1680   2656   
-1408  1152   
336    -176   
1776   368    
-912   2256   
-224   80     
48     640    
-816   -1040  
400    -48    
32     -512   
-128   -128   
128    240    
-32    -176   
336    -80    
-256   48     
-16    128    
64     96     
-240   96     
-80    464    
336    928    
-656   1088   
496    912    
-816   -80    
-448   192    
-304   -144   
736    48     
-160   208    
-144   320    
-96    352    
-64    48     
192    128    
-128   128    
64     -96    
-368   -80    
-288   48     
-160   -64    
400    -144   
-208   -672   
-464   -160   
240    48     
0      -112   
320    -192   
-432   -240   
-176   -16    
144    144    
-144   0      
240    208    
416    400    
-384   240    
-16    240    
240    80     
48     96     
-64    -320   
-336   288    
464    336    
448    64     
-736   112    
192    64     
192    64     
16     384    
384    -96    
-416   144    
208    224    
32     -160   
-112   112    
160    464    
-320   0      
-176   160    
112    -16    
96     -448   
-288   432    
-144   144    
288    -288   
-48    64     
-80    192    
0      48     
-16    -464   
160    80     
-176   112    
0      80     
-64    -96    
-528   -2560  
-560   496    
1216   112    
-992   160    
768    112    
48     -208   
-320   -192   
-464   32     
720    368    
160    96     
-224   48     
-256   208    
-80    -80    
432    48     
-464   384    
144    -416   
32     256    
-192   176    
16     48     
128    -32    
528    1360   
-1328  -128   
-64    96     
1216   128    
-512   -96    
144    240    
-448   368    
144    -96    
144    0      
240    128    
-432   64     
-224   -32    
32     48     
448    -112   
-96    128    
-160   160    
96     240    
112    112    
96     -128   
-320   128    
64     64     
80     128    
16     96     
-64    32     
224    64     
-560   64     
272    176    
48     128    
48     80     
-368   -672   
-32    2448   
5216   2032   
-1792  -352   
-1504  -208   
1344   688    
80     -64    
-432   -48    
64     -528   
640    368    
-752   256    
256    288    
400    144    
80     80     
-288   272    
656    272    
-208   160    
-64    -16    
304    352    
-64    272    
304    192    
0      128    
-640   -560   
448    -512   
-64    -688   
192    -192   
-624   -928   
752    -176   
-608   416    
-128   -80    
352    192    
-80    0      
368    80     
-96    112    
-176   128    
80     224    
464    0      
16     112    
-176   144    
-144   80     
160    240    
336    -448   
-256   -96    
592    0      
-544   -64    
528    112    
0      48     
-640   224    
320    -112   
-32    -208   
-96    224    
96     48     
-272   -176   
608    -240   
-48    208    
-352   -80    
480    -384   
-64    160    
-240   -640   
416    192    
-80    80     
64     64     
48     80     
-96    64     
16     -464   
128    128    
256    384    
144    16     
-288   80     
304    -112   
16     144    
-752   -3712  
-1632  -1184  
896    -832   
528    112    
-400   -32    
352    608    
-576   352    
384    368    
80     -128   
-16    240    
-192   -320   
64     560    
272    -400   
-32    224    
160    -144   
64     256    
112    -32    
-80    -352   
-176   -752   
160    -1152  
128    768    
-48    464    
144    304    
-320   -16    
320    -144   
-224   176    
112    0      
-32    112    
-32    416    
320    880    
-528   -96    
224    -496   
96     -944   
80     592    
-80    96     
-144   176    
256    -1072  
-96    -128   
-336   -112   
192    144    
-48    48     
32     80     
176    144    
-64    -416   
112    720    
16     400    
352    352    
-528   -144   
112    896    
144    -240   
80     -128   
336    448    
-656   -416   
-592   -416   
832    32     
-432   64     
80     -256   
-144   480    
624    1456   
-176   16     
80     -416   
224    416    
-112   -160   
64     80     
352    -1184  
16     144    
-64    -48    
80     80     
-96    16     
-64    32     
112    448    
-32    -224   
-96    64     
64     -128   
64     112    
128    240    
-384   48     
-96    -128   
192    -16    
32     -176   
64     -512   
-496   -176   
688    -560   
-80    432    
-448   -288   
336    -672   
-320   -128   
-256   -752   
560    32     
64     -112   
-304   -32    
112    -64    
-64    -128   
96     -240   
336    -16    
-400   -352   
-64    80     
96     -208   
272    224    
-256   -304   
-144   -96    
960    400    
-1376  480    
640    -336   
608    -384   
-288   128    
32     -368   
-432   -496   
384    -640   
-192   288    
272    -192   
192    112    
-32    -128   
-336   -336   
0      -80    
464    -176   
-128   128    
-176   -80    
-96    0      
256    -448   
64     0      
-208   -288   
32     -128   
288    -224   
96     256    
288    -16    
-304   -32    
-496   64     
144    64     
288    -16    
112    -96    
-1824  -1200  
-1232  -288   
1136   -288   
-816   448    
912    544    
-224   -144   
-1184  -1536  
320    -2976  
304    1712   
-528   -528   
128    -320   
-112   -64    
-272   -48    
224    -224   
256    80     
-528   176    
-448   128    
-752   1056   
96     32     
48     -16    
-64    -528   
1072   -128   
-2160  -1632  
1536   -256   
-304   1136   
128    864    
-224   -64    
560    -320   
96     -496   
80     464    
-640   512    
-48    128    
304    -384   
-256   -48    
320    272    
-640   -352   
0      16     
320    -1056  
-288   -176   
256    80     
-192   -32    
224    352    
-128   -592   
480    1344   
-2192  1424   
-368   112    
976    -448   
-1072  -1088  
-80    48     
-736   320    
-352   -336   
160    0      
240    -256   
64     400    
272    -912   
-416   -880   
-528   16     
944    -112   
-608   224    
-192   -944   
-432   256    
384    16     
-272   80     
-112   48     
0      -272   
576    160    
96     32     
-32    -384   
-80    -336   
576    -432   
240    -1712  
-2416  -544   
1008   -288   
480    16     
-304   -128   
-80    272    
-144   -528   
448    576    
368    -288   
-592   256    
400    -272   
-176   176    
144    -320   
144    176    
-336   -16    
-80    176    
160    -80    
-336   -48    
736    336    
-1056  416    
480    224    
272    -48    
-352   -144   
368    -32    
-144   80     
-1232  -224   
240    112    
-352   -208   
-112   -96    
192    208    
80     -96    
-400   0      
-240   -16    
-224   -224   
-208   -64    
-288   -128   
480    64     
-496   224    
-32    -96    
16     304    
-80    -192   
-448   -16    
368    128    
-128   144    
-112   48     
-336   32     
-48    0      
112    144    
-128   -16    
-288   -32    
80     16     
272    592    
-112   80     
-464   400    
576    208    
-80    0      
-320   -128   
-160   -96    
112    -192   
224    -160   
-208   0      
16     48     
80     112    
-144   -48    
-160   -80    
-16    208    
-848   112    
192    336    
96     288    
-528   336    
272    -448   
-80    128    
80     -16    
-224   128    
192    -224   
-96    -160   
-176   480    
272    -272   
-144   80     
-112   64     
-32    112    
208    2496   
1904   -112   
-1616  416    
-240   176    
528    -128   
48     -48    
0      -224   
-144   816    
384    -272   
-160   48     
112    48     
160    -272   
-208   160    
32     432    
224    32     
-128   -32    
64     432    
-1040  -176   
16     32     
160    0      
-96    400    
512    -384   
-768   208    
176    -48    
240    128    
-64    368    
336    -272   
-432   -32    
-48    80     
16     0      
32     16     
-160   -16    
-1008  -256   
16     176    
176    80     
-304   32     
160    -128   
112    16     
-496   112    
192    96     
368    32     
16     32     
-496   -64    
0      -240   
320    224    
64     -64    
-96    288    
-368   -96    
-80    144    
1424   976    
-1984  832    
80     144    
496    -48    
-464   -464   
48     192    
416    240    
-160   848    
-448   896    
112    208    
256    48     
-336   -128   
-128   144    
-208   -112   
128    256    
352    16     
-304   176    
-48    -176   
144    352    
64     352    
-304   128    
624    816    
-1632  -432   
272    112    
256    512    
608    -128   
-304   784    
-288   128    
-240   -48    
48     144    
64     -32    
-48    96     
-128   96     
16     48     
384    272    
-464   80     
-96    16     
176    192    
96     416    
-80    -32    
-288   -192   
112    -80    
-272   -128   
64     -80    
80     -240   
528    -288   
-464   432    
192    112    
-144   -80    
-240   160    
-128   112    
304    -544   
592    -624   
-944   416    
432    208    
224    -464   
-624   368    
128    128    
16     160    
96     -144   
-96    192    
-224   -16    
32     128    
176    -16    
-32    288    
432    416    
-864   352    
-80    -64    
336    96     
-528   -1232  
-576   -1632  
1536   -2160  
400    544    
-304   512    
-1104  688    
816    -384   
-400   -1072  
224    -176   
208    192    
-400   352    
128    -144   
208    -48    
-208   -224   
-32    1008   
-272   -144   
384    -208   
192    304    
64     0      
-32    32     
144    256    
-96    432    
224    256    
96     112    
-224   -672   
-80    -704   
96     64     
-16    16     
-176   112    
-224   1104   
64     768    
176    96     
16     112    
-96    -192   
0      272    
32     -464   
16     -192   
128    0      
-176   -816   
-80    -352   
208    880    
-176   -80    
224    -208   
-64    0      
-48    96     
-240   -352   
288    -368   
-144   -640   
224    416    
400    384    
-96    448    
-16    -64    
-304   -224   
480    -288   
-352   -208   
240    512    
160    192    
-144   288    
-192   -848   
640    -528   
64     1120   
-208   592    
-160   -144   
96     -16    
256    320    
-80    176    
-32    -48    
64     -96    
-32    -192   
-32    -48    
-112   272    
32     112    
-48    16     
96     96     
16     48     
0      16     
304    144    
-528   272    
48     -208   
512    80     
-304   -1328  
-176   160    
-128   -144   
576    32     
32     464    
208    -224   
-224   240    
48     208    
-96    -80    
480    112    
-48    480    
-272   -224   
352    -16    
-96    -480   
-80    272    
224    -464   
-96    192    
48     32     
96     128    
16     160    
160    -48    
32     48     
784    432    
-1136  672    
528    -160   
544    -144   
-64    -112   
-48    640    
-128   224    
288    448    
64     464    
-16    144    
-64    -1216  
64     48     
-48    0      
16     0      
112    688    
224    416    
-544   48     
-112   -208   
560    -688   
0      -464   
-272   96     
-224   288    
256    272    
208    -624   
400    -176   
-560   -560   
-240   240    
672    224    
128    -16    
-288   -96    
-1552  -912   
384    -96    
528    0      
-880   32     
-272   512    
800    576    
-880   512    
-304   144    
464    -144   
-288   48     
-80    0      
112    96     
16     -48    
208    -80    
-80    96     
32     128    
-176   -96    
144    -224   
64     -32    
-176   -400   
-208   -512   
1168   96     
-848   96     
112    -512   
336    256    
80     -288   
0      32     
32     128    
224    112    
128    -304   
-976   -48    
544    -1424  
224    16     
-208   -1200  
-176   -304   
-32    160    
304    64     
-64    16     
-128   48     
256    144    
-160   -128   
64     -2272  
-320   -272   
736    -320   
-336   80     
-288   -560   
-416   -112   
416    -880   
-368   -944   
544    128    
-96    -272   
48     -240   
96     -208   
64     -384   
208    -1264  
48     -96    
-176   -272   
96     416    
144    -128   
160    -256   
-544   -48    
64     -144   
128    -16    
416    -400   
-240   -192   
192    0      
368    64     
-96    -3072  
112    -64    
816    992    
-1120  -1904  
-2080  -1392  
2240   96     
-656   -128   
-400   -336   
208    400    
-128   -400   
-1152  240    
320    -368   
-320   128    
-224   -128   
-176   -288   
304    -1168  
-304   -16    
112    -64    
-384   160    
208    -96    
32     112    
608    -192   
-1200  80     
656    16     
-128   -32    
-992   -336   
432    272    
-80    16     
-560   -16    
416    112    
432    144    
-544   -32    
-128   -1264  
688    32     
-128   -256   
16     144    
-192   0      
-160   -160   
288    16     
160    -128   
-288   -160   
352    -64    
-608   -48    
256    112    
-336   80     
48     -96    
240    112    
-192   -1056  
-32    288    
-96    128    
320    -80    
-288   -96    
112    -240   
128    16     
-96    -288   
320    32     
-192   1328   
-192   480    
0      416    
192    96     
-272   -528   
-208   -224   
80     -384   
160    -32    
-288   -96    
352    -16    
-80    -112   
-96    -64    
0      48     
64     -448   
-48    -400   
32     368    
-640   128    
128    -192   
128    -128   
16     -272   
-48    -112   
-16    -256   
352    224    
96     736    
224    -480   
-192   128    
-112   592    
320    368    
-176   1360   
1808   -736   
-1808  -16    
224    -96    
880    -32    
-528   528    
64     -240   
-32    320    
352    -816   
-128   -208   
-112   -16    
-144   144    
-160   -96    
96     112    
272    -240   
-208   288    
-144   -128   
208    -336   
48     192    
0      0      
768    1040   
-1568  -64    
704    -96    
-832   -656   
-272   -176   
128    272    
-480   32     
48     -416   
240    -48    
16     144    
-480   112    
16     288    
304    -96    
-80    128    
-656   -224   
-16    -16    
-480   -208   
128    160    
-112   128    
64     144    
-80    48     
-160   48     
-384   -32    
-464   -16    
352    0      
-512   32     
432    160    
-144   96     
-176   160    
-1312  -864   
1456   -720   
432    80     
-608   112    
256    192    
-832   -304   
336    -96    
-16    -64    
-224   160    
-128   -80    
48     224    
-144   -64    
-288   32     
-80    -176   
272    0      
-496   -320   
176    64     
144    192    
-480   144    
368    80     
-64    -144   
-416   -176   
1216   1200   
96     80     
-304   -400   
-48    160    
16     592    
144    16     
-368   -48    
176    80     
-416   -16    
176    160    
-128   -112   
144    144    
32     160    
48     32     
-16    64     
144    144    
-64    144    
-208   0      
336    -32    
-320   -160   
144    224    
-208   288    
-192   320    
-432   -224   
272    -400   
-208   -592   
-480   -112   
464    -48    
160    624    
-928   416    
448    16     
-240   288    
-208   -272   
-608   352    
336    -384   
-48    240    
512    80     
-304   16     
-1152  -128   
192    112    
304    -64    
32     80     
-64    256    
-192   176    
48     1200   
496    144    
-448   -208   
96     -224   
-16    240    
1936   2336   
-1328  976    
-784   -256   
1328   -880   
-1312  -144   
-656   144    
32     -64    
800    944    
-160   448    
-176   -864   
-160   32     
64     128    
96     16     
-96    64     
-304   432    
0      672    
176    368    
-64    -224   
-48    -176   
-304   160    
48     400    
64     -96    
-272   64     
0      -256   
-112   144    
0      272    
-96    272    
176    208    
-544   16     
288    -48    
-352   128    
256    -16    
32     192    
-64    -32    
-272   -48    
160    16     
-336   -352   
256    736    
32     1040   
192    112    
16     -96    
-128   16     
96     272    
112    -160   
144    176    
-240   128    
-272   112    
512    144    
-32    48     
-528   -688   
96     512    
448    320    
-800   864    
384    320    
256    1104   
-16    224    
-368   -976   
144    -592   
-896   -1104  
336    608    
352    496    
112    432    
-144   -224   
-432   -448   
384    -48    
-32    -48    
80     -192   
-512   -144   
64     336    
176    48     
-240   80     
80     176    
-64    288    
-352   336    
96     80     
64     -48    
192    256    
16     224    
160    112    
-112   0      
-16    -80    
768    272    
-1248  752    
720    -464   
-272   -192   
-368   416    
192    528    
832    352    
-880   576    
-240   400    
208    48     
112    16     
0      -96    
-32    112    
-336   352    
144    160    
272    176    
-400   512    
-224   224    
16     176    
128    224    
-304   944    
240    480    
-672   -352   
-144   192    
160    416    
48     208    
-208   816    
64     0      
-64    -384   
96     112    
112    48     
-48    544    
32     -48    
48     -416   
80     800    
-64    -416   
-48    400    
-208   -32    
288    -64    
-96    16     
-64    368    
64     -112   
208    -176   
16     160    
-160   304    
336    272    
-32    80     
32     80     
288    336    
-736   -144   
1552   -1424  
-560   944    
576    768    
-176   304    
-1280  -80    
1440   -64    
-272   464    
-176   -368   
-224   -64    
176    48     
32     128    
-144   80     
0      -96    
448    32     
-368   -112   
256    128    
-48    272    
-32    -96    
112    128    
-48    -96    
-224   -816   
1136   -64    
-1248  -384   
1104   -160   
-80    448    
-816   0      
224    0      
384    240    
320    -160   
-144   96     
-144   -400   
-224   80     
272    -128   
176    192    
48     0      
-416   48     
480    624    
-336   -1248  
544    -80    
-112   -1504  
-240   240    
-96    -288   
992    96     
-160   80     
288    -160   
336    -352   
80     144    
256    640    
-352   544    
496    192    
-368   48     
-160   288    
80     -80    
128    160    
400    -256   
16     160    
-256   -16    
256    -144   
560    -672   
-32    80     
-320   128    
112    176    
-112   -208   
464    -32    
464    144    
-128   -320   
-16    224    
-288   16     
176    48     
-1312  -2416  
2320   -1440  
256    480    
-1600  688    
304    512    
48     -128   
464    -144   
-304   640    
-224   192    
-128   -368   
592    -80    
176    -176   
-80    112    
128    -224   
80     128    
384    -224   
-224   64     
288    96     
96     96     
256    224    
-1184  0      
944    64     
-272   64     
464    16     
528    160    
-1120  -112   
480    -176   
240    64     
-80    -144   
-48    -48    
0      160    
32     144    
-176   -176   
240    144    
-176   112    
720    176    
-592   144    
16     192    
128    320    
192    -64    
-48    32     
-32    -336   
272    224    
-208   -144   
256    240    
288    0      
-608   -192   
400    -560   
32     -224   
176    112    
144    -1312  
-480   112    
224    -320   
-832   144    
976    -32    
-592   -1488  
-48    -208   
320    80     
16     272    
368    304    
-256   256    
0      320    
32     -128   
144    -960   
64     -48    
-144   64     
-224   64     
320    224    
-208   -656   
128    -176   
432    -976   
-224   64     
32     -528   
32     -160   
-80    192    
96     -128   
-112   32     
192    -96    
-96    48     
-96    -160   
320    -192   
928    1632   
-2336  112    
816    -176   
912    -800   
-704   -80    
272    192    
-16    -48    
272    -96    
-368   -3728  
240    -496   
-16    128    
-128   240    
400    -176   
-176   48     
16     -496   
-16    288    
-368   -256   
32     -192   
-480   16     
-256   -48    
64     16     
-112   944    
1312   -608   
-720   -96    
-272   512    
224    -48    
-32    224    
304    -800   
-80    -208   
-176   -416   
-16    -160   
432    96     
128    -80    
-928   112    
0      -80    
-16    16     
304    -176   
32     32     
112    -512   
-112   112    
-144   -800   
688    464    
-160   512    
-224   240    
-48    -352   
128    112    
192    32     
-80    -208   
-240   16     
16     48     
576    2112   
-1488  -272   
-1584  -512   
2192   -448   
-656   -224   
-176   -1488  
240    -96    
-544   -784   
512    -352   
-400   -368   
176    -496   
-192   -112   
128    80     
208    256    
-208   192    
-624   304    
192    0      
-240   -64    
-192   -160   
128    272    
16     -288   
-640   -448   
1728   -400   
-368   -352   
-1040  240    
1040   496    
-848   -688   
512    -976   
-32    -224   
-448   64     
48     16     
32     -80    
0      96     
32     -192   
-224   208    
128    -336   
80     112    
-368   -528   
240    -960   
224    -544   
48     -144   
-80    0      
-80    -160   
-864   -1424  
352    -480   
368    400    
-672   -320   
592    64     
-256   -32    
-112   480    
-32    -240   
192    288    
0      256    
-32    208    
384    288    
-784   912    
-816   240    
400    80     
-544   -32    
64     -336   
-464   -496   
272    -48    
96     192    
-272   -304   
-144   192    
-64    16     
-1856  224    
-576   -160   
-304   -384   
-160   -16    
-352   -64    
544    1168   
784    -512   
-96    -224   
-800   240    
256    1296   
400    0      
48     -1568  
-16    -672   
-288   352    
-144   -528   
576    432    
-96    -176   
-144   384    
-288   224    
48     560    
176    -224   
-256   -288   
-160   -416   
-176   -432   
-48    -784   
96     272    
-32    336    
-928   -320   
816    -80    
256    464    
-288   400    
-80    -1024  
-672   -800   
432    1120   
-48    288    
32     272    
-96    -304   
-96    576    
256    816    
48     336    
-480   -928   
-96    528    
96     112    
96     144    
224    -64    
-384   -176   
96     480    
-16    320    
-64    -144   
-64    -1056  
-464   448    
32     -352   
-64    -368   
368    -480   
-384   0      
208    208    
-1024  752    
752    64     
64     -16    
-400   -176   
-112   -80    
160    -48    
-816   -1072  
240    -1664  
96     -112   
-96    448    
-208   -96    
-16    368    
-416   -224   
-64    -416   
-224   48     
224    288    
-176   -64    
112    -288   
96     -256   
-352   544    
192    192    
-160   240    
112    32     
112    384    
-272   1328   
-112   1056   
-256   -544   
272    -432   
272    48     
-1136  -944   
144    -880   
-240   448    
96     768    
-992   -16    
112    -240   
-160   -48    
16     -272   
208    -512   
-256   240    
-112   -64    
-160   336    
208    -16    
-352   -16    
-224   -240   
-1360  16     
48     -64    
176    96     
-272   96     
-176   80     
-112   -1264  
208    -1216  
-352   208    
128    -48    
-16    -64    
0      80     
-80    -192   
-160   288    
32     -16    
32     32     
-528   -96    
-48    160    
80     48     
-160   160    
144    -32    
-496   -448   
160    32     
48     640    
224    16     
-144   -64    
64     80     
112    -48    
-128   208    
64     -224   
-80    304    
160    48     
-192   224    
80     0      
-96    -16    
-576   -1648  
2432   -992   
-1632  304    
0      -560   
1072   224    
208    288    
-1232  672    
528    688    
304    176    
-880   -256   
368    160    
-80    80     
128    32     
32     -64    
-16    176    
192    32     
48     272    
-144   -144   
-320   -144   
144    0      
-416   -32    
128    192    
160    560    
1136   96     
-832   128    
304    16     
-368   -80    
576    80     
0      176    
-96    352    
-32    176    
-288   64     
240    112    
128    64     
-128   -16    
48     176    
48     80     
-16    192    
-160   -192   
80     64     
208    336    
-320   0      
496    976    
-976   -176   
-784   -416   
1200   -80    
688    448    
-496   -144   
-384   -256   
512    -416   
160    96     
-80    224    
-432   96     
224    192    
704    256    
-336   512    
-624   336    
-64    208    
720    -48    
448    160    
-464   -16    
-352   96     
-144   -352   
384    -48    
-64    144    
-976   -160   
896    -272   
640    208    
-576   208    
-576   80     
-512   -1728  
528    48     
1008   240    
-2080  80     
-32    16     
800    -96    
832    -96    
-1232  320    
-352   -272   
496    320    
32     160    
-160   16     
320    0      
-352   -256   
16     128    
288    320    
48     128    
-336   128    
688    32     
0      192    
-1120  224    
1056   288    
-288   -32    
432    -96    
-112   -16    
-432   240    
560    64     
-400   0      
176    -1104  
-128   96     
48     -576   
-448   -32    
528    -112   
-224   304    
432    304    
48     192    
-80    -208   
-304   -64    
400    48     
-288   16     
-224   -96    
176    80     
-128   0      
96     -256   
-176   320    
640    0      
-144   64     
-80    0      
-32    -224   
224    -672   
-128   -352   
-32    -16    
-32    -336   
-576   224    
592    176    
-736   320    
320    32     
112    -32    
-192   -32    
192    352    
-112   -16    
176    224    
-48    -1200  
48     -80    
160    112    
-80    400    
-224   -48    
176    -64    
-32    -304   
-144   48     
352    80     
-80    192    
0      -32    
64     -576   
144    -176   
112    -336   
-336   512    
256    -64    
32     -16    
192    -176   
-80    48     
-576   -800   
1312   80     
-880   384    
-112   240    
432    -640   
-896   -1264  
576    32     
768    560    
-336   368    
-288   96     
176    352    
560    -64    
-160   624    
-128   -512   
48     240    
240    176    
-160   736    
-80    240    
-160   80     
112    64     
112    -96    
-368   -352   
736    -368   
-1040  -352   
464    -1072  
208    1376   
240    -240   
-400   288    
16     176    
96     -208   
-128   -80    
240    -16    
-112   144    
16     -32    
48     320    
64     -576   
-16    -288   
96     -288   
80     560    
-32    -464   
-16    272    
32     -464   
-64    16     
-336   -576   
112    288    
192    176    
224    -320   
96     -256   
-192   -32    
-16    -16    
-176   -112   
864    256    
1680   -352   
-1744  -240   
736    240    
560    512    
-272   368    
160    336    
336    -1584  
-336   -304   
64     1120   
320    -176   
112    96     
16     -32    
112    -304   
96     -96    
96     -2432  
-48    -336   
-192   -128   
112    0      
160    128    
688    -368   
-2528  -864   
1008   336    
320    496    
-864   -336   
800    -112   
112    -416   
-1120  -560   
-32    -320   
400    -160   
-288   -368   
-160   -80    
16     -128   
336    -160   
32     -112   
-48    -368   
-48    -448   
-416   128    
816    -1104  
-32    -864   
-448   -416   
-128   -624   
-32    48     
-528   -672   
960    816    
-176   1616   
-800   -528   
768    -768   
80     304    
-256   -2224  
144    -896   
512    128    
112    96     
-464   32     
384    272    
-736   -112   
512    480    
-128   -1168  
-736   -1056  
192    -160   
-352   -64    
272    -272   
-128   -736   
-288   -416   
16     -1408  
-112   144    
400    160    
-208   416    
-64    -160   
272    144    
-160   -1840  
-1968  -528   
1504   1296   
-160   880    
-528   464    
304    432    
-336   1040   
-192   -720   
192    112    
128    -1488  
-96    640    
-544   -2320  
240    -80    
336    48     
-400   224    
112    368    
160    112    
-224   -432   
16     -848   
-272   64     
64     624    
-1232  -176   
432    576    
272    176    
-768   128    
816    -336   
-416   -2400  
320    -1648  
-160   -336   
384    336    
-128   592    
-80    -96    
-192   224    
176    -448   
-320   -400   
-80    -288   
288    736    
-384   -128   
176    -480   
400    -496   
-784   -560   
0      -1344  
160    -192   
0      688    
144    0      
-832   -864   
560    320    
-528   48     
160    -656   
-64    304    
-176   528    
-48    1376   
880    -192   
-16    -256   
-1904  1136   
992    -208   
-320   -784   
176    608    
288    832    
-96    1248   
-272   320    
0      256    
352    688    
-128   304    
-384   -288   
-16    -800   
64     -208   
-192   -448   
48     -80    
-16    -1152  
-544   -624   
256    -496   
32     -128   
272    -224   
-256   0      
0      256    
32     -224   
112    -592   
32     -112   
-208   -32    
-112   -608   
1536   1376   
-32    608    
-624   -528   
-16    336    
-112   400    
-848   -160   
-160   256    
-496   16     
-800   -256   
112    0      
-576   -224   
0      240    
176    336    
-592   -16    
464    -208   
-304   272    
-112   128    
16     -64    
-224   -304   
-112   32     
192    1728   
240    -256   
-688   -320   
464    -32    
-112   -128   
-208   256    
64     -128   
-384   48     
0      -160   
-672   128    
816    160    
-384   64     
-160   -112   
-272   -144   
352    112    
128    128    
-80    -16    
-272   -224   
-64    -16    
224    0      
-192   80     
144    112    
-384   0      
384    -16    
-320   -176   
304    128    
-96    -128   
128    144    
-304   -48    
1456   2000   
-1264  608    
-1536  752    
2096   -288   
-608   -128   
-704   -80    
224    -208   
224    64     
-240   -64    
48     -48    
-272   -112   
-48    64     
96     -48    
160    272    
-192   -80    
-192   224    
208    -80    
-208   96     
144    -128   
-80    160    
16     0      
464    848    
-128   -752   
-1472  -112   
864    -272   
480    -32    
-480   512    
-176   464    
176    304    
-96    -80    
96     -192   
-32    48     
16     96     
-224   144    
240    112    
288    48     
-544   48     
16     -224   
-128   512    
464    704    
-1056  112    
-48    -32    
384    288    
768    -112   
-576   224    
144    256    
-544   272    
48     -528   
-720   208    
-672   192    
816    -192   
-256   -272   
-32    320    
-432   0      
-176   320    
96     -112   
704    432    
-1920  -176   
-576   128    
-32    32     
-512   176    
432    -48    
-208   160    
16     -48    
-96    80     
144    16     
-96    144    
-80    -16    
64     -48    
320    176    
1152   5088   
-576   2304   
-848   -1888  
2336   -624   
-624   -32    
-608   512    
704    176    
-176   -432   
-480   112    
32     -192   
176    240    
48     48     
-256   112    
304    32     
-224   0      
16     128    
336    96     
-128   32     
-96    16     
288    768    
240    336    
-592   224    
320    64     
-224   176    
-256   0      
272    80     
112    -32    
-432   160    
48     48     
384    176    
192    48     
-304   96     
-16    -224   
-96    128    
208    272    
-368   560    
272    336    
-16    80     
-192   -64    
-16    128    
96     32     
96     -176   
-80    -160   
-64    -208   
-176   -32    
-288   32     
256    144    
-288   176    
192    192    
208    96     
-416   -208   
-32    -512   
192    -560   
-112   688    
160    720    
272    1568   
528    592    
-432   -224   
48     -128   
144    -96    
-240   -432   
-256   -320   
576    -384   
-192   -80    
-176   -208   
80     -288   
-160   688    
192    176    
96     144    
-208   -176   
-48    144    
32     176    
192    336    
-160   0      
-128   -160   
0      -144   
-16    -528   
112    -384   
64     672    
32     128    
16     240    
752    592    
-1504  2000   
928    -128   
144    -112   
112    -688   
-160   752    
-240   48     
96     272    
0      16     
32     -96    
-64    -80    
64     32     
144    128    
64     -208   
-80    -64    
16     -176   
256    272    
-48    -80    
96     160    
112    0      
192    592    
-304   160    
-496   -48    
848    -1120  
-272   -528   
-272   -48    
464    -80    
-480   -112   
176    -64    
400    176    
-224   48     
-304   64     
16     -64    
-48    240    
240    -160   
-80    336    
-176   160    
-256   -96    
320    -448   
-64    -48    
-144   -704   
-144   32     
240    -48    
448    208    
-128   144    
-592   400    
144    -48    
368    -208   
48     96     
-272   272    
-1056  -848   
-144   1072   
784    -400   
-1600  -160   
704    336    
64     16     
-624   -64    
736    -816   
288    1504   
-112   512    
-32    0      
0      -384   
-224   32     
224    -16    
112    -32    
-80    -160   
-256   -32    
352    -192   
128    352    
-176   64     
640    816    
-976   -912   
-496   -160   
912    -48    
-736   -80    
304    -464   
-96    -128   
112    -1440  
-464   -1168  
304    448    
-96    544    
-112   288    
448    384    
-336   528    
224    608    
544    -704   
-480   608    
320    544    
96     1152   
96     736    
16     -80    
32     0      
-80    -160   
96     -592   
-752   -688   
272    -128   
320    448    
-480   304    
512    496    
48     192    
-512   32     
144    -192   
432    -336   
240    400    
-576   -176   
-96    -960   
112    160    
192    656    
-448   624    
-272   336    
448    112    
-208   -144   
304    576    
-720   -192   
64     -48    
656    -192   
32     96     
208    -1152  
-592   144    
16     128    
-992   -1056  
-352   256    
240    96     
32     -160   
-96    -992   
0      -560   
-304   -1056  
80     -496   
384    -16    
128    848    
-48    -368   
-208   -96    
208    32     
256    176    
176    0      
-272   96     
288    176    
112    64     
-128   -160   
-208   -288   
64     384    
96     32     
608    272    
368    -64    
-1616  192    
1072   -160   
-144   -32    
336    -288   
-672   -176   
240    -304   
112    -96    
-96    128    
32     -1216  
32     16     
160    32     
-64    -416   
-224   -48    
48     -2160  
-64    -128   
160    -304   
-688   -736   
288    -176   
160    336    
48     48     
240    -64    
-96    -1040  
-80    -640   
-528   -624   
432    -240   
-336   208    
-64    48     
0      -16    
160    -288   
-224   -224   
80     208    
496    512    
-768   352    
224    -784   
-224   -656   
352    -16    
-144   -144   
-192   -192   
256    -160   
-16    -112   
-112   16     
48     -64    
-256   -384   
128    -288   
48     288    
208    -432   
-224   -176   
-128   -4048  
144    176    
64     80     
208    80     
-368   -80    
-144   112    
320    128    
80     -32    
-464   -160   
-672   -1216  
704    -1168  
-1520  528    
736    -208   
-512   -368   
-272   288    
384    -1120  
160    64     
336    688    
-160   -304   
-192   128    
416    32     
-64    -64    
16     -240   
-256   80     
-32    -48    
224    -160   
48     192    
-16    -192   
-80    -64    
16     144    
368    1280   
992    -352   
-1072  -176   
384    32     
368    -288   
-208   496    
448    -272   
-48    144    
-240   -208   
-240   80     
384    96     
272    -48    
-1728  -16    
272    112    
-224   48     
224    -16    
-64    208    
624    -1536  
-688   176    
368    -32    
-112   96     
112    80     
48     32     
-400   -368   
320    -48    
64     -272   
-144   48     
64     64     
-64    96     
16     832    
16     352    
-400   352    
416    -128   
304    400    
-1056  -336   
656    304    
-80    48     
-624   176    
352    -48    
144    -32    
112    -80    
-160   128    
144    16     
-448   -352   
336    144    
-112   -368   
80     -16    
-144   -144   
128    0      
-64    64     
16     -688   
-800   752    
640    -80    
-1312  -272   
1344   176    
-208   96     
-800   32     
400    16     
512    -368   
-256   112    
0      -176   
144    128    
128    -176   
32     -112   
-400   -48    
-48    -80    
96     160    
-16    -16    
160    48     
-16    -48    
-144   -16    
-160   128    
976    -416   
-832   -48    
480    32     
-240   64     
160    752    
-1392  -352   
-336   192    
656    -304   
-624   128    
-240   192    
-288   32     
256    -96    
-272   128    
-416   -176   
-112   -240   
512    496    
336    -128   
-464   0      
-240   -112   
112    80     
80     48     
16     80     
-64    -144   
-496   208    
224    64     
-192   -144   
-128   -224   
272    -3216  
-2864  -1776  
2272   688    
496    512    
-432   -192   
-688   240    
-144   -352   
1056   48     
-384   -224   
-80    240    
288    -80    
-400   112    
208    -208   
-32    192    
-288   -176   
-48    224    
144    48     
-16    -208   
-128   48     
512    704    
-32    -272   
-272   -944   
144    -224   
-464   32     
-528   -208   
976    -240   
-144   32     
-224   336    
-176   448    
176    -96    
-144   -304   
-368   -128   
384    -16    
64     -112   
-352   32     
-32    -192   
48     -480   
-112   -368   
112    -160   
-32    0      
-192   -96    
48     -192   
160    -224   
-192   -96    
128    -224   
-240   -368   
112    -16    
-416   -112   
-384   -176   
304    -224   
400    16     
-96    256    
-240   -304   
-816   336    
400    -272   
208    0      
-544   128    
-48    288    
32     48     
0      -720   
-144   -192   
48     864    
-288   208    
-80    336    
-32    128    
-32    -272   
-80    16     
-224   384    
-288   -80    
240    320    
80     -240   
-272   128    
-128   96     
-160   112    
208    -208   
-176   -144   
-32    16     
-160   16     
-176   480    
-880   -160   
192    -64    
-288   -288   
864    -1056  
-512   336    
400    -432   
240    96     
-80    144    
-48    288    
48     256    
-272   176    
-32    80     
-16    48     
-128   -144   
128    192    
176    64     
-112   0      
144    160    
-176   112    
160    -64    
0      -64    
-112   64     
288    560    
-368   400    
64     -48    
544    -464   
-192   -736   
-448   576    
-336   -288   
688    0      
528    896    
-720   176    
-272   112    
368    -80    
32     -48    
112    208    
-176   96     
-48    112    
-16    32     
48     112    
96     64     
-32    -16    
192    176    
-144   240    
80     144    
-48    -16    
-400   -432   
96     176    
160    -128   
-176   -16    
784    496    
-560   624    
1168   400    
-3248  -816   
48     -240   
1104   -192   
-720   -464   
-144   -320   
-192   -192   
32     640    
320    -1520  
64     -608   
-144   896    
-288   112    
224    -96    
256    240    
-288   -224   
-208   -96    
-16    -112   
304    -96    
144    208    
-80    96     
-448   -688   
1280   464    
-960   -48    
-320   -32    
592    256    
-304   1376   
-400   1920   
384    992    
512    64     
-640   1008   
592    880    
64     368    
-176   16     
368    240    
96     -144   
-192   -32    
176    -64    
-432   -240   
224    -208   
320    128    
-400   224    
112    160    
304    256    
96     96     
-1008  -1744  
192    -640   
528    400    
-112   624    
480    544    
256    544    
-896   80     
32     -144   
112    -112   
432    -192   
-224   32     
-288   -368   
1024   -192   
176    -80    
384    512    
16     16     
-240   -96    
544    192    
128    336    
-576   336    
-176   -256   
256    -240   
480    -64    
96     160    
0      736    
-416   96     
848    -1440  
-1392  -960   
304    176    
608    192    
-32    -192   
96     272    
-528   -64    
288    160    
256    -96    
-32    -16    
-368   -464   
192    240    
80     -512   
304    352    
-80    64     
-560   192    
512    128    
0      128    
608    384    
-800   336    
144    -544   
320    -448   
-128   64     
192    288    
192    192    
-368   -144   
320    -96    
-272   -720   
656    -208   
-368   -448   
208    -80    
160    -64    
32     96     
128    -560   
-64    48     
-64    0      
448    16     
-32    -64    
0      -112   
0      208    
128    -176   
-144   -48    
384    -208   
-112   -16    
-208   -1424  
256    160    
240    -112   
32     48     
-320   -80    
144    288    
384    112    
-128   144    
-256   96     
784    -112   
80     0      
-176   -176   
480    -112   
-112   32     
96     752    
-288   -128   
144    80     
96     -80    
176    32     
-336   -208   
96     80     
144    64     
80     -480   
-288   -16    
112    384    
16     -48    
176    -64    
-32    96     
16     -128   
-80    96     
80     -576   
160    208    
176    -992   
-272   160    
64     -32    
144    64     
80     48     
-976   288    
2224   -816   
-976   -240   
-400   624    
1536   -640   
-656   288    
192    -160   
-400   480    
224    -320   
32     96     
16     64     
-64    -16    
-16    48     
16     -208   
496    -448   
-288   -272   
80     304    
80     -432   
-32    96     
32     -160   
832    832    
-1664  736    
592    -224   
576    -608   
-512   160    
384    112    
-192   288    
48     288    
-144   16     
288    80     
-288   -432   
-192   160    
240    -96    
112    0      
-128   112    
736    272    
-608   64     
80     304    
-224   -352   
416    48     
-256   96     
160    -624   
-288   48     
-64    -384   
544    -352   
-608   -32    
496    48     
-224   16     
-16    -528   
400    -96    
560    448
[truncated: 266,011 more chars]
