# Supplementary material for: A Fault Diagnosis Method for One‐Dimensional Vibration Signal Based on Multiresolution tlsDMD and Approximate Entropy
Source: Hindawi journal article supplement (doi:10.1155/2019/3262818), 2019-01-01
Supplement: f1 [file 3262818.f1.zip › 3262818.f1/gear signals/pitch errors signal/Data17.txt]

560    -48    
352    16     
-736   16     
-192   448    
240    192    
288    176    
32     -192   
-160   128    
-176   64     
128    32     
16     96     
144    -144   
-544   -32    
480    16     
-288   144    
208    240    
-96    496    
352    208    
-240   240    
96     416    
1520   -192   
-976   1072   
-128   176    
-128   208    
160    304    
544    -128   
-16    208    
-224   144    
-16    -16    
256    48     
16     48     
-128   32     
-288   224    
672    48     
-112   80     
-48    224    
-352   -160   
416    -224   
32     -96    
32     160    
384    96     
-160   224    
-112   -640   
-352   272    
288    304    
-96    -160   
320    96     
192    192    
-112   32     
-592   -1168  
112    368    
512    272    
-784   -96    
704    192    
160    224    
-160   -128   
48     32     
96     80     
112    96     
80     128    
-48    64     
16     304    
-208   -32    
128    448    
608    -144   
-160   176    
-592   -352   
1040   208    
-48    -1792  
-1952  -1424  
688    -48    
880    560    
-64    272    
-80    704    
-48    -336   
-48    96     
-96    48     
560    384    
-368   224    
-272   -128   
160    48     
128    304    
32     -288   
-320   -128   
-208   192    
-128   0      
-64    -240   
240    144    
-64    368    
-96    48     
-224   -384   
224    -624   
80     -288   
-288   32     
-80    -400   
416    -896   
384    1280   
80     304    
-240   624    
160    96     
192    48     
160    240    
-416   -480   
-176   -400   
-80    48     
-64    -1216  
128    -176   
64     912    
-48    -240   
-304   -368   
144    -368   
112    64     
176    -2096  
-704   -784   
448    -320   
-128   928    
-224   -176   
112    576    
192    -160   
144    -256   
-544   0      
816    592    
-592   736    
336    192    
0      480    
-192   -880   
-704   -704   
688    336    
160    704    
128    -224   
-128   160    
-176   256    
240    -16    
208    144    
-352   0      
208    -384   
128    160    
0      32     
48     80     
-112   144    
0      80     
16     96     
112    -272   
-16    464    
384    -192   
-448   64     
48     112    
400    176    
-16    144    
480    448    
-960   496    
656    -144   
16     240    
48     128    
-112   64     
544    -48    
-480   768    
208    -1040  
432    -448   
-288   -848   
0      32     
144    -128   
-224   128    
112    -128   
64     80     
-208   -64    
96     128    
176    112    
80     -32    
-240   -320   
80     -192   
-272   336    
224    -208   
160    128    
-208   -608   
-112   -32    
144    -1504  
32     -432   
48     304    
144    160    
-112   -192   
0      48     
-192   -64    
128    -480   
384    -48    
-112   -192   
-48    -16    
96     528    
448    576    
16     -400   
-320   -144   
32     -528   
272    32     
80     224    
-144   272    
96     -48    
-80    176    
-240   432    
464    -272   
-1408  1680   
2224   -64    
-336   512    
-592   -368   
576    -144   
96     -544   
-960   -624   
304    -560   
160    -112   
-368   -80    
112    176    
-64    -64    
0      112    
128    240    
96     -80    
48     112    
-304   -400   
256    -160   
-96    -528   
-64    0      
-160   -736   
960    -64    
-1168  192    
608    -16    
208    512    
128    352    
-64    -16    
80     -80    
208    -656   
128    -432   
-928   -1776  
544    -80    
192    160    
-192   16     
-176   -64    
0      32     
272    208    
-48    -64    
-160   -1472  
240    96     
-48    -144   
-16    64     
-1120  -416   
672    -432   
-176   -112   
16     -896   
-592   560    
320    208    
-672   464    
672    288    
-128   -336   
-16    -464   
368    -368   
64     -416   
-16    416    
400    144    
-192   352    
-592   -400   
-80    -384   
192    -176   
-208   -192   
224    -16    
240    -304   
304    -160   
-144   -432   
-32    16     
368    -192   
-240   -96    
256    -112   
448    1648   
1008   4160   
-2656  1712   
2000   -640   
1072   -384   
-1072  0      
-352   64     
736    -176   
-208   -688   
256    336    
-288   -1152  
-128   272    
64     -80    
464    240    
-128   -128   
-192   304    
112    -160   
-32    80     
256    -144   
304    512    
-1552  -192   
-112   112    
928    -320   
-672   -384   
-640   -240   
496    -544   
160    80     
-256   -944   
-32    -16    
-16    -272   
-208   96     
448    64     
-32    32     
-320   16     
368    80     
-272   -80    
-320   -128   
-384   -48    
304    0      
0      96     
464    -208   
-240   112    
288    -1408  
-64    144    
144    -160   
16     -96    
-128   -80    
160    -176   
-32    -64    
-192   -192   
0      64     
304    96     
-336   -112   
416    -16    
192    -496   
-160   -976   
-432   -48    
704    -944   
-48    16     
-128   208    
-352   64     
352    80     
-96    -112   
-32    32     
16     -112   
-304   96     
208    -64    
-256   -64    
-176   -208   
304    16     
-32    -448   
-144   144    
128    -448   
112    -32    
-272   48     
144    48     
-272   272    
176    -1104  
-288   -416   
80     704    
-112   -400   
160    -368   
-1072  -2064  
816    -768   
-192   112    
-624   -112   
1072   384    
-352   -528   
-176   224    
-288   -368   
256    -48    
176    208    
-448   448    
80     -240   
-96    96     
160    -336   
-192   -32    
-80    80     
0      -80    
160    560    
112    -208   
-192   -96    
-528   -592   
-576   -752   
-432   496    
800    0      
-784   256    
96     -112   
-80    -64    
576    448    
-688   208    
-16    -64    
-96    -48    
-256   -224   
304    48     
-352   -64    
-16    32     
-256   -80    
-160   64     
-112   -32    
-80    -112   
80     -112   
-448   48     
-288   0      
320    64     
-240   0      
256    208    
96     64     
-800   -160   
384    48     
-160   -96    
656    336    
-1712  960    
1264   704    
-80    288    
-656   -112   
1456   304    
-1248  240    
96     272    
0      464    
-48    -144   
32     -16    
-144   128    
288    -64    
48     80     
-112   -64    
208    32     
-352   80     
-48    -288   
240    -352   
-432   -160   
0      128    
-16    96     
-480   -864   
0      -352   
304    -352   
-528   -864   
-144   -32    
48     128    
176    48     
-208   -16    
304    -80    
-32    64     
144    80     
-96    48     
-96    48     
48     256    
80     64     
-304   -64    
-64    96     
224    256    
-736   96     
112    32     
-96    -48    
16     -80    
352    -48    
336    32     
-320   368    
176    -240   
416    -64    
-640   96     
-144   -48    
768    -240   
-304   96     
144    -32    
-48    80     
512    -256   
-560   320    
720    -528   
-624   64     
-64    208    
240    64     
80     32     
-240   48     
-176   -48    
16     48     
96     208    
560    560    
-976   880    
16     32     
-144   208    
-176   448    
-432   -224   
-688   704    
1040   112    
-1200  -688   
304    -640   
800    -448   
400    -800   
-240   896    
-384   1232   
16     -1136  
480    720    
80     -64    
-288   -544   
48     208    
176    -32    
480    640    
-400   496    
-304   -464   
144    288    
272    256    
-48    432    
-288   192    
240    -80    
-224   432    
80     896    
80     720    
112    544    
-112   -48    
16     -16    
-32    80     
112    64     
-16    192    
-48    160    
16     64     
-80    -224   
-64    448    
96     -64    
112    1024   
352    -544   
-384   -912   
-128   -32    
272    0      
0      -80    
128    32     
-208   32     
-16    192    
240    -48    
-272   272    
-32    -240   
160    640    
64     240    
-80    -416   
384    -448   
-816   -496   
0      -992   
-384   -1520  
224    -48    
-192   624    
640    896    
288    1456   
224    -80    
-272   -160   
-256   16     
176    0      
352    400    
144    48     
-160   208    
-32    384    
-160   -64    
352    240    
-256   144    
-176   -48    
-96    -80    
144    -128   
-176   -16    
-112   -48    
416    -352   
416    -256   
-128   -32    
-400   192    
80     160    
432    688    
-384   -96    
288    32     
-112   992    
96     -432   
288    -464   
-64    -320   
240    -96    
96     -256   
464    -208   
96     192    
-144   144    
-48    224    
240    -16    
0      0      
32     -64    
48     -144   
-16    -16    
288    16     
-16    -112   
0      -576   
-496   -560   
144    352    
256    16     
-16    -304   
208    -48    
-368   -496   
112    336    
352    256    
0      -16    
-16    272    
-224   -288   
-80    112    
-32    576    
16     -416   
48     464    
-112   -464   
128    96     
-64    640    
-192   64     
-112   -144   
96     112    
0      -192   
16     192    
-80    -144   
-144   -32    
240    16     
-64    -16    
-336   -64    
368    -608   
-320   1920   
1456   208    
-688   -1120  
320    96     
992    -1408  
-976   144    
656    144    
192    -16    
80     -112   
-16    128    
80     80     
48     128    
-112   16     
0      160    
448    240    
-240   112    
128    -32    
176    304    
32     336    
16     112    
-16    128    
-608   -400   
1296   -448   
-624   224    
0      -80    
448    400    
176    -80    
-192   -416   
-272   288    
96     -48    
-112   64     
304    208    
128    -144   
-192   96     
-192   -688   
512    0      
-176   -32    
336    144    
-144   0      
160    -64    
-48    -16    
-96    144    
-384   -528   
592    -112   
-192   576    
-752   -16    
48     64     
224    -304   
640    640    
-32    -320   
-96    336    
464    -464   
144    112    
64     320    
-608   80     
-96    -224   
352    -304   
176    -48    
-528   -144   
-48    112    
80     -16    
32     208    
480    -16    
-224   64     
-784   16     
16     256    
960    -720   
48     -192   
-480   -816   
1392   1584   
-2544  624    
-320   1152   
784    160    
400    160    
576    -80    
-592   -64    
80     -320   
224    -352   
624    160    
-480   -32    
192    240    
-80    -288   
96     128    
80     -544   
-368   272    
480    -48    
-160   48     
-32    16     
144    112    
528    -1024  
-288   32     
752    16     
-768   -48    
128    320    
272    -288   
-528   144    
800    -272   
-576   16     
-48    320    
96     32     
224    -80    
80     16     
0      48     
320    -352   
-560   272    
800    0      
-288   16     
80     -224   
240    256    
192    64     
-304   144    
192    48     
336    -32    
64     -432   
-416   -32    
256    48     
-64    -1088  
672    336    
-336   -176   
-160   -624   
256    -64    
256    144    
0      -272   
-656   400    
576    -64    
-336   192    
96     16     
32     -1920  
-224   -160   
144    -1344  
96     -112   
144    -240   
-160   -112   
-496   128    
-112   -320   
48     -176   
224    -336   
-80    -336   
-288   -784   
192    128    
304    16     
-16    -48    
16     -448   
80     16     
96     -32    
-224   128    
-32    240    
176    -224   
-128   -208   
-144   48     
-448   -896   
528    -2704  
-736   688    
1200   -128   
-976   112    
16     -1840  
416    -160   
112    112    
128    -288   
-576   592    
288    80     
16     -224   
240    -48    
-528   64     
0      336    
96     16     
160    -384   
96     176    
-160   -416   
-16    -64    
128    -1104  
-208   -992   
192    352    
112    -80    
-608   -416   
496    272    
-16    -320   
-16    352    
-624   208    
96     384    
-496   32     
32     -176   
-208   -192   
-80    -272   
0      -16    
384    -160   
144    288    
80     32     
-384   240    
96     -32    
160    -256   
-48    -160   
416    -256   
-336   96     
240    80     
-320   384    
64     -16    
-544   -112   
160    -112   
416    512    
-992   -32    
1712   -1088  
-640   -2224  
144    -208   
240    432    
-528   -96    
384    -208   
224    112    
-160   208    
256    112    
-704   -64    
208    64     
-96    -32    
128    -80    
64     -16    
224    -432   
-48    176    
192    -1280  
192    624    
-48    416    
144    -128   
352    1232   
-1232  -880   
-864   48     
1712   -384   
-1168  0      
544    640    
-384   -416   
-448   -352   
592    -192   
-160   -80    
224    128    
-304   -144   
-80    -144   
176    -16    
-48    -160   
80     -32    
16     -144   
-368   -656   
-144   -512   
0      -160   
32     -80    
-160   -16    
64     -864   
336    -1104  
-640   -432   
336    224    
48     -736   
-496   -112   
560    0      
192    496    
-128   -32    
-256   192    
32     128    
0      -112   
32     512    
784    208    
144    -416   
240    576    
224    336    
32     -160   
112    16     
-928   -480   
-16    -352   
48     -224   
-240   64     
-256   16     
256    -96    
368    -576   
-176   -224   
288    16     
1008   2544   
-1088  960    
-288   -224   
720    -336   
-160   -144   
-544   2000   
-160   1152   
-32    -480   
272    -464   
-208   432    
-64    -480   
-672   288    
224    16     
368    16     
-368   96     
-128   848    
128    -48    
512    64     
96     672    
0      640    
-272   -16    
96     -528   
224    416    
272    112    
-960   -176   
176    400    
-32    224    
-48    -592   
-816   -2640  
64     -240   
0      192    
-80    128    
-320   -864   
80     -144   
-48    448    
144    944    
384    -176   
-16    112    
-224   384    
48     384    
-32    112    
64     -224   
-160   16     
80     480    
80     96     
144    -624   
304    352    
-400   96     
80     240    
-208   -64    
240    64     
-208   1008   
1040   336    
-432   512    
-16    208    
288    128    
-160   16     
384    1376   
-160   -720   
-368   -1184  
160    256    
-16    288    
32     -64    
0      224    
-32    -496   
48     -832   
-48    -112   
-32    -16    
-128   448    
-112   -400   
-80    0      
224    432    
-128   240    
-240   144    
48     -64    
-336   -192   
208    496    
80     880    
80     64     
-304   -80    
-336   -800   
1088   -1568  
464    496    
-160   -128   
160    1120   
752    -304   
-528   -384   
384    32     
-480   96     
144    -384   
96     -64    
48     32     
-624   192    
-176   -224   
480    176    
336    80     
-400   432    
-32    -16    
128    -96    
160    -80    
-112   112    
272    832    
-368   496    
112    -352   
224    -16    
-240   160    
64     -144   
-736   0      
224    80     
-240   -32    
-16    176    
208    80     
-64    -80    
-240   160    
432    -16    
-208   272    
-48    816    
288    -64    
32     -432   
-336   128    
208    0      
160    192    
-208   64     
48     32     
-64    80     
400    -32    
-448   32     
224    64     
-112   160    
64     -16    
1376   2016   
-240   -320   
-2624  144    
2160   -224   
-208   -80    
-800   128    
240    144    
640    656    
-224   -64    
16     192    
208    -64    
-224   224    
240    32     
-64    48     
240    -16    
-496   96     
304    144    
-480   128    
224    240    
48     80     
-352   -32    
0      -464   
1120   656    
-224   -48    
-112   192    
288    -64    
-144   208    
176    16     
-112   0      
128    -96    
-96    224    
-336   0      
272    160    
-48    -80    
16     48     
48     -32    
-240   96     
128    208    
-368   -96    
368    -80    
160    304    
-16    32     
288    784    
-1296  -64    
-496   -352   
1488   -112   
592    64     
-656   -64    
-400   -464   
528    -336   
192    176    
0      288    
-368   144    
160    256    
736    400    
-192   640    
-576   272    
-48    192    
688    -48    
400    208    
-384   -48    
-400   0      
-48    -416   
128    -48    
0      304    
-832   -144   
800    -64    
768    432    
-656   144    
-592   160    
256    -1136  
-624   1024   
1536   -1568  
-1840  -16    
160    -560   
768    -240   
576    144    
-1136  304    
-400   -320   
400    -160   
416    16     
-464   -32    
368    64     
-320   160    
192    96     
144    256    
352    32     
-480   32     
592    64     
416    368    
-1200  416    
704    512    
176    -272   
96     192    
336    -576   
-752   240    
704    -32    
-208   112    
192    -160   
-352   48     
272    -128   
-544   -32    
528    -32    
-224   160    
288    432    
48     320    
112    0      
-464   -80    
432    112    
-144   -288   
-192   80     
192    -576   
-192   64     
192    64     
-192   256    
400    224    
-192   -16    
-112   -96    
-16    -144   
240    -416   
32     -208   
-112   -160   
-48    -240   
-624   416    
688    -16    
-672   416    
240    -192   
112    -48    
-240   -464   
112    160    
48     -192   
32     80     
-16    48     
80     176    
160    240    
-16    480    
-144   -32    
16     -176   
0      -432   
-256   -416   
224    -176   
-16    -144   
64     64     
64     -96    
96     96     
112    384    
-368   416    
208    160    
144    -416   
-48    -480   
-80    -64    
-256   80     
1488   1712   
16     272    
-1264  -656   
816    -400   
-448   -864   
480    -496   
384    -576   
-320   32     
-144   -2624  
32     192    
464    0      
-80    464    
-176   -112   
64     448    
256    -240   
-224   -864   
-144   -352   
-80    -464   
144    -32    
160    -320   
32     -400   
-48    96     
-336   -208   
16     -656   
320    768    
-256   272    
16     240    
-48    -544   
448    32     
-192   224    
32     -80    
-32    288    
32     112    
16     -144   
64     -80    
16     128    
-16    -64    
272    -208   
-144   -176   
176    -160   
-288   368    
208    32     
-288   -224   
0      -592   
144    288    
-80    80     
32     0      
96     -144   
240    224    
256    -128   
-1504  496    
2352   -240   
-160   -176   
-1248  80     
1344   -256   
16     592    
-960   -1632  
560    1232   
32     -512   
-304   -608   
384    208    
32     128    
-224   -176   
256    160    
384    -48    
-96    96     
-48    -160   
208    32     
-144   80     
80     -432   
96     352    
944    -336   
-2320  176    
1088   -704   
128    -800   
-976   -416   
320    -592   
576    432    
-32    -672   
-208   176    
80     -32    
-192   -112   
144    -832   
-176   -176   
32     -176   
-256   160    
-48    -64    
224    -576   
-784   -784   
336    144    
240    352    
-48    528    
64     256    
608    -112   
-736   544    
416    -3648  
560    -64    
-848   288    
0      -48    
192    -320   
112    736    
-272   -16    
-48    48     
-208   -256   
-176   -80    
704    -32    
-464   -512   
-224   272    
320    576    
-256   736    
704    -240   
-176   256    
48     560    
16     528    
32     -32    
352    96     
-512   -32    
208    352    
192    224    
16     -16    
-144   96     
992    -1104  
-656   -672   
1440   -720   
64     -704   
-1360  -1280  
448    -1040  
1088   -16    
-16    -416   
-320   32     
-16    -272   
416    528    
160    384    
-320   112    
48     -208   
-592   -224   
144    -352   
-592   -80    
-208   480    
224    752    
32     -432   
96     -176   
-336   -3440  
656    144    
-192   -432   
-368   640    
448    336    
-112   1536   
176    -240   
-160   80     
-496   -768   
0      288    
-256   -272   
176    704    
240    400    
-112   -208   
112    -176   
608    -320   
-64    720    
176    736    
304    1152   
-48    816    
192    -672   
-352   -688   
304    512    
-144   960    
112    -432   
368    224    
-208   -16    
-16    -576   
-176   -704   
-128   -528   
736    -304   
32     1296   
-1216  -1328  
-1024  -336   
384    32     
-304   -1552  
-128   -272   
-64    -304   
160    560    
0      -64    
-256   -192   
160    336    
-176   752    
160    -320   
-112   0      
-96    -288   
128    -176   
304    336    
-512   144    
48     240    
240    176    
16     336    
-128   -48    
-112   -240   
144    -976   
-272   -368   
80     128    
0      208    
-416   -32    
640    2368   
832    -96    
-1936  -272   
336    208    
16     -464   
192    -1024  
-288   -640   
-144   -848   
-96    160    
272    336    
-80    16     
0      256    
-48    -400   
-176   -224   
416    -112   
-288   464    
-80    -144   
-192   -256   
-64    64     
-336   0      
-160   544    
-192   -512   
-800   -48    
448    -64    
336    160    
-416   96     
400    96     
-544   -400   
288    48     
-400   -320   
352    240    
80     -96    
-256   0      
-64    -16    
288    96     
-32    48     
-208   80     
-128   -48    
-144   112    
416    -64    
-304   -16    
272    16     
-368   -224   
272    112    
-160   192    
272    176    
-160   80     
-144   -64    
0      112    
-400   -16    
960    -512   
-1664  400    
1184   128    
176    320    
-192   112    
-592   224    
32     688    
-112   160    
352    64     
-16    -48    
-240   80     
-80    -16    
80     -96    
240    32     
-384   -16    
112    80     
-176   16     
-160   80     
-80    -96    
-48    80     
-432   -448   
1088   928    
-16    16     
-624   -192   
-144   192    
496    -224   
-336   -352   
64     -208   
304    64     
96     160    
-448   112    
-432   32     
384    -16    
-16    -96    
0      192    
64     -16    
-80    432    
-256   -208   
-272   -240   
800    0      
-224   112    
-256   -544   
-576   288    
352    0      
-320   0      
896    -176   
-496   352    
-160   -80    
288    80     
-304   496    
160    176    
-528   224    
-720   -208   
208    -128   
416    -208   
-320   -304   
-480   -48    
32     288    
288    352    
416    -192   
-368   0      
224    -144   
-192   256    
-80    64     
128    112    
-160   -256   
208    144    
80     16     
-176   32     
-928   -2080  
1248   -1296  
736    -160   
-1792  832    
928    368    
-320   -304   
-336   0      
928    688    
-304   0      
-160   208    
-16    64     
-176   0      
192    64     
-64    64     
144    16     
-96    0      
-80    160    
-80    160    
-256   16     
112    -336   
-384   -720   
224    -16    
-336   -160   
592    48     
320    -96    
-464   160    
-176   144    
192    176    
-16    -48    
-80    -192   
-336   -128   
176    160    
80     432    
-224   192    
144    96     
336    -304   
-224   -176   
-240   -16    
144    336    
224    224    
-48    176    
-240   128    
144    288    
-32    304    
208    336    
96     128    
-80    16     
64     -208   
-96    -176   
144    -16    
-80    240    
-48    480    
368    960    
304    0      
-240   -464   
-64    -1344  
-448   -672   
416    80     
0      432    
64     192    
176    512    
-272   400    
-96    384    
736    0      
-512   384    
-80    544    
-32    -256   
288    -160   
-176   -160   
-128   432    
32     208    
48     16     
-96    -144   
-48    -64    
160    224    
-16    336    
64     400    
-80    896    
0      -240   
-64    -304   
64     -144   
-256   -432   
272    -1552  
-112   752    
688    -368   
-704   -768   
240    400    
96     -304   
272    -304   
-112   96     
32     240    
-32    640    
48     -368   
192    -16    
-32    256    
-96    256    
96     240    
80     -16    
16     16     
0      -96    
112    208    
-288   224    
128    528    
384    -112   
-560   496    
-32    352    
-96    272    
-128   -288   
544    -768   
144    400    
-240   576    
-128   -176   
128    -144   
176    64     
224    112    
-272   -768   
-96    144    
128    192    
320    192    
-64    368    
-208   208    
32     208    
224    -16    
-32    -64    
-176   80     
64     -144   
384    448    
-160   288    
-80    240    
32     -64    
224    -464   
-432   -416   
2288   -1296  
-1840  1184   
1104   -128   
448    128    
-608   400    
480    32     
64     -480   
-368   -352   
144    1200   
128    528    
-96    -448   
80     -192   
192    32     
-288   128    
64     -16    
128    -192   
16     144    
-464   -480   
288    496    
240    -96    
-848   0      
1216   -736   
-464   192    
144    144    
256    944    
-16    656    
32     784    
-208   -304   
256    -1472  
-272   -1120  
112    -832   
128    240    
-240   -1568  
336    752    
48     -416   
-592   -32    
240    -1280  
-64    -944   
32     -544   
32     304    
16     160    
-16    16     
80     32     
-144   1120   
816    768    
-112   -272   
-816   -688   
112    -1600  
144    -736   
-384   -432   
208    -64    
48     320    
-176   128    
-80    -240   
160    496    
128    640    
-32    -96    
272    -416   
-448   -320   
-64    -160   
-144   -96    
32     -16    
-96    -864   
-112   -352   
320    352    
-528   0      
128    224    
-112   256    
208    336    
-96    -384   
-480   2768   
640    -768   
-864   0      
-176   -384   
1232   1616   
256    432    
-256   976    
80     192    
-32    -32    
416    -1088  
-160   768    
80     240    
-128   -96    
144    -96    
240    -352   
-128   352    
-240   -112   
-160   336    
576    400    
-64    544    
-192   -352   
160    48     
32     -288   
-720   -960   
432    -144   
-432   -1744  
-192   240    
208    -864   
224    -800   
48     240    
-240   416    
368    -128   
-224   -784   
-48    -112   
-80    0      
256    -416   
112    176    
-96    320    
80     48     
-160   496    
496    208    
-160   240    
-352   -576   
32     32     
144    176    
224    -16    
-160   640    
528    336    
-16    128    
-224   -1712  
160    -64    
464    368    
-1088  384    
48     -288   
656    96     
-48    -816   
-368   -288   
-240   592    
576    240    
0      -32    
-32    144    
192    224    
-272   32     
-80    0      
352    32     
-16    -16    
-432   -880   
384    -192   
0      -480   
32     288    
-128   176    
240    -80    
-352   -16    
224    -64    
48     -112   
-144   -48    
-16    -160   
0      -176   
112    160    
32     -416   
928    2592   
-2032  -1888  
-896   400    
2016   -480   
-944   -48    
272    -96    
-256   192    
304    -304   
432    -112   
-304   176    
0      -160   
-736   192    
416    -144   
-128   -160   
-32    -576   
-144   272    
160    -1088  
-80    464    
400    -80    
-272   192    
-272   -208   
832    608    
-176   0      
-432   -400   
560    48     
-192   -192   
-128   560    
448    -176   
112    176    
-400   -224   
-288   64     
592    -144   
272    64     
-272   -688   
256    176    
-416   64     
320    -80    
16     240    
624    -208   
-816   128    
336    -144   
-144   112    
304    -160   
-336   80     
-288   -352   
192    160    
80     -560   
-112   272    
368    -832   
-224   144    
-768   -2048  
496    -1552  
112    -304   
-720   -48    
624    288    
-864   -400   
464    192    
-32    -384   
-800   32     
560    -512   
-96    96     
240    -576   
-176   80     
160    0      
-16    -16    
-80    144    
176    -112   
-288   32     
-128   -48    
32     32     
160    32     
400    1040   
-752   -208   
-176   128    
176    -192   
-896   -112   
1056   -32    
-432   80     
128    -272   
-288   80     
-16    16     
96     -96    
-352   32     
272    0      
-96    80     
192    48     
-304   64     
64     -336   
272    112    
-32    -32    
112    64     
-208   -48    
48     -96    
-896   288    
288    -128   
-1248  192    
-32    -192   
352    -272   
816    64     
16     -160   
-448   320    
-256   32     
-1024  -192   
144    128    
-144   -288   
96     -368   
-304   0      
64     128    
-48    -384   
-576   400    
144    80     
-288   0      
128    64     
0      16     
-272   16     
-80    -144   
336    -480   
-304   16     
224    80     
-320   -112   
-1360  -1232  
2736   -3344  
-336   1152   
-528   304    
-848   192    
576    400    
784    -304   
-768   -48    
-192   -160   
0      192    
-608   0      
432    192    
-192   -208   
160    192    
-128   -272   
80     48     
16     -64    
-224   144    
-304   80     
-80    -784   
-464   -1280  
-64    -1200  
-448   -256   
256    80     
480    16     
-640   -464   
-32    32     
-352   -96    
288    96     
224    -80    
-128   192    
-64    480    
-80    112    
224    208    
112    224    
-512   384    
288    -16    
272    288    
-96    176    
-208   208    
16     -16    
-48    208    
240    288    
0      400    
-128   288    
368    592    
-176   656    
-272   352    
368    256    
64     352    
16     592    
-160   528    
-112   1024   
1120   -416   
-592   -512   
-224   -448   
144    -256   
128    -128   
208    -384   
-160   -736   
16     816    
-176   464    
96     -336   
160    -112   
112    0      
-48    -272   
-80    96     
-16    144    
208    -336   
-16    112    
-208   -400   
48     240    
-192   -32    
256    48     
-240   -32    
-256   272    
96     192    
144    592    
-32    928    
208    96     
96     -32    
-160   16     
-496   -128   
464    -128   
-240   192    
-432   -240   
32     176    
128    -80    
64     0      
192    64     
-48    144    
-96    224    
128    0      
-64    -32    
-224   0      
16     32     
96     0      
128    -96    
-192   96     
-64    304    
-32    -208   
160    80     
-288   864    
688    -320   
-944   80     
176    -384   
336    64     
192    176    
-64    -336   
-544   -304   
112    96     
16     320    
160    0      
-128   -320   
-256   304    
-176   144    
224    0      
-48    0      
-80    96     
32     96     
-48    16     
96     -64    
-80    128    
16     128    
16     80     
48     32     
224    0      
-368   16     
368    32     
-336   -128   
-192   496    
-16    512    
112    336    
2944   -1280  
-1952  112    
608    -672   
160    -208   
-352   -496   
608    240    
-912   144    
-304   -1648  
0      -128   
256    352    
-80    16     
-48    208    
-48    160    
208    240    
96     0      
-96    -304   
-176   32     
80     -16    
96     80     
32     -560   
-1728  752    
1648   -48    
-608   -224   
-368   -1248  
496    448    
432    976    
-576   -272   
-176   -544   
528    432    
-512   640    
208    576    
368    832    
-336   688    
-32    272    
384    -128   
-192   -384   
448    -464   
-192   -224   
-48    112    
288    160    
-256   16     
-256   -192   
-288   -464   
1504   -1360  
-16    432    
0      1296   
-224   448    
-224   -224   
-80    208    
512    -16    
-224   48     
160    -80    
-32    128    
480    288    
240    1328   
-1040  1168   
176    496    
-112   -224   
-16    -32    
-16    160    
-368   32     
-48    0      
480    -176   
32     224    
-304   -64    
32     240    
416    -80    
-576   -944   
-192   -432   
-304   3424   
304    304    
-1088  -32    
272    -384   
1104   592    
-576   624    
-32    -16    
416    32     
-80    304    
208    688    
208    160    
-480   -16    
208    -80    
320    144    
-48    -112   
208    144    
-208   64     
416    208    
-624   912    
496    1536   
-16    1040   
-224   -320   
448    0      
-400   16     
-224   224    
448    -240   
-752   -272   
512    16     
-496   624    
496    496    
-224   208    
-96    352    
-32    48     
176    80     
128    -304   
48     0      
-672   -336   
336    224    
144    272    
-144   48     
-144   -16    
320    160    
-368   -144   
560    64     
160    64     
-288   96     
-80    32     
208    80     
176    32     
80     -160   
-368   208    
96     -592   
432    -304   
-448   -624   
-288   208    
304    -352   
-432   -48    
208    -16    
0      16     
160    -208   
-160   256    
48     48     
176    -144   
32     -16    
-112   -112   
-112   -112   
304    -1136  
208    224    
-224   -192   
64     128    
-32    -160   
160    0      
-48    96     
160    48     
-80    208    
-64    80     
96     128    
288    -208   
-128   0      
-96    -1120  
432    1344   
-576   -1968  
-1088  544    
2016   576    
-1488  -496   
-80    304    
384    -48    
176    368    
208    -144   
-240   -80    
192    48     
16     -16    
208    -80    
-80    64     
-240   -832   
192    304    
240    80     
-208   64     
112    -1168  
48     80     
0      176    
256    1376   
832    -112   
-896   -208   
80     -208   
400    0      
-336   -80    
224    -48    
0      272    
144    -128   
-208   176    
448    -160   
0      224    
-128   -80    
160    288    
-32    0      
-336   192    
704    48     
-240   -176   
224    -480   
-336   -176   
480    -1248  
-176   48     
368    -544   
-208   -416   
-144   256    
496    -176   
-304   208    
336    -48    
-96    -320   
-944   -2768  
-720   -2176  
1280   -464   
-1344  32     
560    128    
-80    -96    
384    -96    
-832   48     
416    -176   
480    -176   
-80    -1776  
-208   -112   
32     32     
112    192    
-128   -128   
144    240    
-208   -448   
144    128    
-96    176    
-32    96     
-176   16     
592    976    
-416   -384   
-880   -80    
816    -320   
-320   -320   
144    272    
96     -368   
-160   336    
1040   -400   
-368   144    
-128   -16    
80     -48    
-32    48     
80     -352   
0      64     
-144   -112   
144    80     
-32    464    
-480   32     
240    -368   
48     -112   
-128   -2848  
512    240    
-496   -176   
-336   144    
368    -272   
608    112    
-560   -48    
0      -224   
80     112    
-240   16     
-928   -112   
320    112    
0      0      
-432   -64    
-96    64     
624    -544   
-240   -128   
-368   160    
736    80     
-208   64     
-160   -48    
-112   -48    
160    48     
192    -64    
64     -304   
-32    -64    
112    -48    
-160   -416   
-736   -48    
1520   832    
1008   -304   
-2432  -368   
0      -2160  
1168   160    
-224   320    
-64    -16    
-144   128    
-208   -32    
400    16     
256    -80    
-384   -160   
-208   -96    
160    0      
512    16     
-176   -48    
-80    80     
0      -48    
352    -2000  
-176   144    
-128   240    
144    -320   
-144   -64    
-224   352    
384    304    
-336   112    
-16    128    
304    800    
368    992    
-272   -352   
-288   -224   
352    464    
416    560    
96     -96    
-224   -176   
352    224    
-400   608    
128    1184   
96     -176   
-400   -256   
128    -64    
32     128    
112    -128   
-736   -768   
176    96     
368    1120   
-256   544    
752    -864   
-736   -592   
128    224    
-288   -112   
752    -464   
-624   512    
624    -560   
-256   -816   
-384   -384   
176    256    
-32    -160   
-384   -144   
256    -320   
-160   480    
-144   -176   
272    -16    
-208   144    
-176   -176   
-240   -368   
-144   -32    
-80    192    
176    128    
-128   128    
64     -32    
-176   16     
-32    -128   
96     0      
-16    -64    
-192   96     
64     -192   
-160   -144   
160    128    
-384   80     
-208   -32    
272    432    
496    192    
-816   96     
-128   208    
144    -400   
272    512    
-320   608    
48     144    
32     -384   
160    224    
16     -80    
64     -16    
-320   -112   
448    -272   
0      656    
-32    32     
-160   -400   
-320   -144   
16     96     
-208   -176   
656    -528   
-320   464    
624    -112   
-432   96     
144    384    
-160   112    
176    1104   
336    48     
-368   -192   
-160   0      
352    240    
-256   144    
-80    -176   
192    0      
112    -112   
-96    720    
-208   32     
-64    352    
-336   -112   
160    80     
0      -112   
192    -480   
48     32     
128    -112   
-160   304    
272    -256   
-80    -224   
304    48     
-400   352    
960    368    
-2288  736    
-480   -112   
160    80     
192    288    
-208   416    
48     240    
-16    1696   
800    -128   
-304   -1648  
-208   -352   
64     352    
32     624    
-16    -128   
160    -208   
-528   -192   
112    128    
-400   -192   
-160   -496   
-144   -592   
16     0      
-448   464    
1968   -256   
-960   528    
240    848    
336    160    
304    -544   
-64    -1216  
-224   -64    
432    304    
-448   144    
96     32     
16     -96    
400    32     
-256   -144   
-96    96     
384    32     
-192   336    
96     -144   
-144   80     
256    -32    
-48    128    
-160   208    
176    176    
576    -320   
288    -416   
-464   256    
48     -208   
144    -16    
-240   0      
464    -528   
-416   432    
464    64     
-224   160    
-224   176    
112    -400   
-320   -304   
1056   -192   
-640   240    
-16    80     
208    -96    
64     -128   
-528   -48    
160    432    
-784   288    
608    -112   
-624   240    
-368   80     
48     48     
368    -224   
-768   1888   
528    -224   
112    128    
1136   -16    
-960   144    
-784   208    
224    192    
816    80     
-208   96     
-528   -160   
-48    144    
368    32     
272    -80    
16     80     
-304   -16    
240    176    
256    48     
80     48     
-192   -128   
-32    976    
480    96     
-832   288    
448    16     
-256   -208   
528    288    
-528   -48    
-48    128    
112    48     
80     -144   
144    -112   
-224   -128   
176    -112   
-208   368    
-208   48     
-96    -16    
-80    -48    
288    176    
-416   896    
-128   416    
256    352    
112    -160   
-416   0      
480    112    
-160   48     
464    64     
16     64     
-272   112    
-192   208    
64     48     
528    288    
-704   48     
64     96     
0      144    
592    96     
-400   -784   
-784   -160   
1008   -144   
-592   -352   
384    -128   
-256   240    
128    -32    
64     112    
-16    208    
0      80     
16     432    
208    -80    
-272   -2688  
-48    -192   
96     272    
272    48     
-16    16     
-176   16     
-32    80     
176    176    
-16    -32    
64     64     
96     112    
-128   208    
224    -96    
-112   224    
80     64     
416    -1776  
-1920  2016   
1440   32     
-512   32     
400    80     
-224   -144   
-256   224    
-112   -304   
176    -224   
416    336    
-288   224    
-32    64     
-64    64     
208    176    
-288   -64    
256    272    
32     144    
-64    -16    
224    -32    
48     96     
-304   -464   
544    -304   
-544   320    
448    -80    
128    64     
-496   176    
416    32     
192    -48    
-48    -96    
-192   288    
-208   -496   
208    48     
368    -784   
-192   208    
-304   -64    
224    112    
160    -80    
-256   32     
448    -32    
-432   32     
384    16     
-16    96     
0      -48    
-16    -208   
304    -16    
-448   -176   
176    176    
80     64     
176    0      
-208   -432   
64     832    
-896   -624   
800    -64    
-672   0      
48     224    
704    144    
-512   -128   
-160   80     
208    -48    
0      112    
112    -48    
-48    96     
-48    -48    
288    256    
-320   -1952  
256    336    
-144   -48    
-16    112    
128    112    
-96    288    
48     48     
416    864    
-1168  -304   
-144   240    
896    640    
-112   -496   
224    96     
-320   -32    
-16    112    
160    -848   
-96    112    
176    -96    
-240   176    
0      80     
256    0      
96     48     
-144   16     
-64    -400   
-336   272    
272    0      
-64    -640   
-64    128    
208    656    
640    -512   
-400   192    
96     464    
496    -160   
-176   112    
-80    -32    
-48    144    
80     128    
0      -176   
96     208    
-32    -160   
-64    -160   
-64    -400   
80     208    
784    -128   
-336   -64    
832    128    
-416   144    
-96    48     
112    176    
0      -48    
64     -816   
-144   -2224  
640    -544   
144    -1888  
-128   -592   
480    176    
-384   256    
464    2160   
864    -592   
-1952  -832   
-400   -496   
1600   0      
-720   -704   
272    -2272  
528    528    
208    80     
-512   80     
272    16     
80     -560   
-48    144    
240    -80    
48     -160   
-160   880    
160    -608   
640    32     
-224   720    
-16    352    
96     112    
64     -576   
336    -112   
-160   -800   
-192   -1664  
160    -688   
-16    480    
-64    496    
-48    -256   
192    160    
-32    -2256  
-80    -288   
-256   -48    
320    240    
96     -128   
-64    -32    
-240   -224   
320    784    
-448   256    
320    96     
-752   -48    
-400   160    
32     -80    
80     896    
400    288    
0      -864   
-176   240    
144    368    
-400   -112   
208    416    
-224   -48    
416    656    
464    -240   
-400   -640   
160    -208   
160    -272   
384    272    
-464   -64    
352    -496   
240    -224   
48     192    
-96    80     
16     -1008  
48     176    
160    -112   
-224   32     
0      0      
144    -192   
144    -16    
256    -160   
-96    0      
16     -192   
-112   32     
16     -112   
128    -48    
-80    -352   
-208   -192   
320    -816   
336    208    
-208   112    
-48    80     
-544   448    
672    -560   
-912   32     
400    -304   
0      -48    
-208   144    
-144   112    
112    -336   
-832   -240   
112    -304   
64     64     
96     -512   
-16    -16    
112    144    
-48    -64    
-16    -240   
112    -32    
-128   656    
144    496    
-464   -112   
384    -288   
-304   288    
-272   -480   
-112   -208   
96     -176   
208    -48    
16     -336   
-48    400    
-144   -1152  
-128   -352   
336    -64    
512    -480   
-352   144    
176    -32    
-608   240    
48     -336   
224    -320   
16     800    
-336   -176   
144    -896   
784    448    
-128   -128   
16     96     
-64    0      
304    -336   
-368   -208   
48     128    
-240   16     
144    80     
-288   -1344  
2192   -656   
-1008  768    
-240   -416   
928    1760   
720    32     
-432   -144   
368    528    
384    480    
-144   160    
-480   0      
112    224    
112    -16    
-16    272    
16     272    
-64    400    
80     -32    
64     -96    
-224   -256   
128    208    
-560   -64    
560    480    
-2000  464    
736    160    
64     0      
-960   -272   
544    288    
-912   -320   
-480   272    
-160   160    
-16    32     
-16    64     
-208   32     
-224   -224   
416    144    
-352   -96    
-32    80     
176    -192   
80     -64    
-240   112    
48     -64    
-144   48     
-800   -304   
496    -160   
-960   288    
-304   -352   
-224   -704   
256    -96    
-144   -480   
32     80     
96     -80    
-224   304    
-96    16     
-80    -160   
-320   64     
-192   0      
-16    80     
128    64     
224    -304   
32     560    
-64    176    
-432   -48    
128    128    
128    64     
-64    64     
-464   -528   
1024   -64    
-352   -160   
0      176    
608    -128   
-448   1616   
1392   3328   
1104   -272   
-2224  -160   
-64    -544   
1024   -112   
96     96     
-448   48     
0      176    
-112   -32    
-192   -80    
608    -32    
-112   32     
16     -176   
-32    160    
-160   -160   
-272   176    
368    0      
-128   64     
288    112    
-1440  112    
864    -32    
-304   -144   
-352   -128   
576    208    
-64    -16    
-352   144    
736    352    
-384   80     
-288   448    
336    -80    
-256   128    
240    -32    
-128   48     
544    -80    
-1072  -320   
320    -112   
240    256    
-304   -16    
-176   96     
16     192    
112    32     
192    224    
-400   -96    
208    -160   
144    -32    
192    -48    
-160   96     
96     64     
-112   48     
368    240    
-224   48     
-208   -736   
-768   32     
768    96     
-288   544    
224    224    
-80    -144   
-16    -160   
96     -80    
160    0      
0      144    
-320   -192   
176    0      
320    368    
-96    304    
-592   -496   
304    -832   
-416   32     
128    144    
336    -224   
-592   224    
96     208    
352    -32    
-16    -48    
-304   160    
96     288    
-144   0      
256    -288   
-304   208    
32     288    
-176   240    
-64    -2448  
-1136  448    
1584   -528   
-928   112    
-144   128    
80     224    
592    464    
240    -272   
-512   96     
144    240    
32     -48    
304    112    
-208   -48    
112    576    
-320   320    
176    -288   
32     64     
-144   624    
64     320    
0      -16    
-16    864    
624    -448   
-736   16     
-16    80     
272    80     
160    96     
-16    240    
-208   192    
-160   -96    
16     -112   
304    -48    
144    64     
-256   224    
-144   240    
128    0      
240    48     
-480   -144   
176    160    
-16    160    
192    96     
48     -32    
-32    48     
-96    80     
208    160    
-192   96     
-80    176    
288    80     
-16    32     
-160   -320   
1632   1632   
-976   880    
-224   -208   
592    -64    
-592   160    
48     304    
672    416    
-224   624    
-160   384    
-80    192    
32     -96    
112    -192   
272    64     
-400   0      
32     176    
176    352    
-48    96     
-304   -48    
-128   48     
304    -48    
-48    96     
288    1152   
-784   -656   
-1008  -80    
1968   -112   
-832   32     
-176   -2496  
288    -304   
-528   256    
656    480    
-608   240    
64     0      
0      32     
0      16     
-80    96     
96     224    
144    16     
-112   224    
272    64     
-128   176    
-144   -400   
-64    -368   
96     256    
-400   1008   
208    -416   
-96    176    
608    304    
-432   -704   
-464   176    
704    336    
-160   16     
-256   208    
64     256    
-240   128    
-208   -288   
-352   -208   
576    -240   
-592   -288   
480    -32    
-48    512    
-832   480    
64     80     
128    64     
208    272    
-256   160    
-16    -64    
-416   -288   
320    128    
-64    336    
-416   352    
336    208    
848    -304   
-2800  -672   
416    208    
1072   -400   
-704   -96    
-560   592    
-80    1680   
272    1040   
256    -320   
0      816    
-352   -224   
-32    -112   
160    -304   
368    16     
-48    48     
-432   -544   
-48    -144   
0      128    
288    -80    
32     208    
-48    464    
-96    592    
128    416    
32     -48    
16     208    
224    896    
96     720    
-416   -912   
336    -768   
48     624    
-208   96     
32     32     
160    -400   
-16    -208   
-128   -784   
208    -304   
128    496    
-304   128    
-272   -656   
304    256    
96     -64    
-144   608    
-48    32     
-112   -16    
496    80     
-112   -448   
-128   96     
48     -80    
48     832    
448    -368   
-192   160    
-80    1152   
1168   416    
-256   1040   
320    1632   
-176   576    
432    640    
-464   192    
-176   -704   
496    -96    
96     -144   
-128   -48    
144    48     
0      384    
-32    -608   
352    352    
-80    -128   
32     -864   
480    32     
320    736    
-128   -224   
16     -32    
192    32     
-128   -256   
48     -80    
-128   -688   
-144   -416   
704    -1296  
656    -272   
-496   -176   
-80    192    
176    912    
240    384    
-16    -624   
-320   -1616  
144    -1376  
48     336    
112    -848   
336    -192   
16     -384   
-256   -512   
224    80     
160    -416   
80     -112   
-16    -384   
-80    -2144  
16     -80    
352    -272   
240    -16    
-592   16     
-240   -288   
608    240    
160    -1264  
-464   288    
336    -1488  
304    -512   
-240   -128   
336    -176   
-304   240    
96     384    
112    -368   
256    144    
-128   -608   
-112   240    
240    -32    
-64    112    
-80    0      
-144   64     
80     240    
16     -768   
368    -640   
-160   -3488  
-64    -208   
272    -48    
-368   0      
464    -64    
-240   112    
256    -176   
16     -112   
672    192    
-1984  320    
1264   -448   
16     -48    
-448   -448   
224    -240   
-272   -176   
160    -304   
256    592    
-240   -64    
-64    48     
64     -112   
-96    96     
320    -64    
0      128    
-256   0      
-32    80     
0      -112   
-64    -176   
-112   -80    
48     -144   
112    0      
64     528    
416    -624   
-1216  -1952  
1376   -128   
-848   16     
160    208    
32     -16    
32     -160   
480    -320   
-432   64     
-528   -80    
80     -48    
-272   -16    
176    -16    
-304   -304   
-32    -400   
400    96     
-240   -1296  
464    128    
-112   -80    
-80    64     
32     -192   
-208   80     
64     -320   
-176   0      
16     -64    
-80    -112   
80     0      
608    -368   
-656   16     
-240   -160   
304    256    
208    -320   
-48    208    
-16    -48    
-560   -336   
144    -464   
192    -64    
-32    352    
-192   192    
-544   320    
224    112    
208    -224   
-96    -560   
-384   80     
544    -160   
-272   96     
672    -144   
160    224    
-1552  -1856  
2448   -816   
896    -576   
-2048  144    
176    272    
992    -512   
-256   -432   
-400   -112   
80     320    
48     -224   
-240   352    
-112   -384   
384    144    
32     -352   
0      -48    
160    144    
-272   96     
96     -32    
560    16     
208    128    
-1440  160    
800    80     
-16    -80    
112    -16    
368    64     
-240   128    
-656   48     
848    272    
-1376  64     
448    272    
-544   128    
-80    176    
-192   -80    
-32    -288   
0      -224   
48     -160   
16     96     
-256   -64    
160    144    
-624   -48    
-96    96     
-208   -256   
-144   208    
192    -96    
96     48     
96     -48    
-32    16     
128    32     
-448   0      
-576   -32    
416    16     
-144   48     
384    592    
-1136  240    
128    -560   
-64    512    
528    176    
-144   80     
-64    -400   
192    0      
160    224    
32     144    
-384   80     
-64    96     
224    -48    
16     -64    
-208   80     
-272   112    
352    16     
-16    624    
320    400    
-128   -320   
-32    96     
64     320    
-96    160    
-48    -32    
112    320    
-368   400    
112    -128   
160    -224   
-160   -16    
-272   48     
480    -2352  
-352   816    
1392   -640   
-1072  672    
144    -240   
-224   -224   
992    -592   
-288   320    
-256   272    
-160   -80    
384    -112   
-96    144    
32     -128   
-368   464    
-16    -80    
-384   -272   
304    -240   
-48    -336   
0      400    
32     -192   
-144   -1008  
336    160    
-16    16     
-896   288    
480    -1088  
-32    -336   
176    192    
-352   -368   
112    208    
64     -144   
-64    -560   
112    -544   
-16    -16    
544    192    
-128   64     
16     496    
-96    160    
-128   -544   
144    0      
-48    -80    
-288   160    
16     32     
208    32     
-64    -112   
-96    -112   
-32    208    
32     64     
-272   -16    
-208   -128   
-192   16     
608    192    
512    -976   
-336   -288   
496    416    
-528   -64    
-368   160    
320    112    
160    -288   
-320   -320   
-224   -320   
128    -16    
64     0      
-416   -144   
352    -288   
208    -304   
-288   16     
96     144    
240    256    
-64    336    
240    496    
-416   -416   
1184   448    
-1616  -208   
208    -224   
1216   224    
-912   368    
-288   -416   
-256   -1088  
416    -928   
-592   -80    
-32    0      
144    128    
0      -48    
160    -272   
-112   -496   
64     -160   
-96    -32    
448    224    
272    128    
-384   -304   
192    -256   
-112   -192   
352    -240   
-320   608    
496    704    
16     -160   
-832   -192   
80     -976   
-48    144    
32     608    
208    576    
144    224    
48     720    
288    560    
-1248  624    
-224   -48    
576    -192   
32     784    
528    368    
-144   560    
-32    80     
272    -112   
-64    320    
-176   112    
-64    288    
64     96     
-384   -192   
96     336    
224    48     
32     112    
-688   -880   
1552   -1792  
112    320    
464    432    
-144   448    
-928   1232   
896    256    
-144   -96    
0      -928   
48     992    
80     160    
320    -464   
288    -64    
-256   160    
-80    144    
368    192    
112    96     
512    -48    
-256   -448   
-192   -304   
128    -96    
16     64     
0      80     
80     304    
-16    208    
-16    448    
320    736    
176    320    
-544   368    
96     -32    
-96    -704   
144    112    
128    -256   
-128   -96    
112    432    
160    32     
64     -816   
-128   128    
272    288    
32     -1216  
-304   208    
-16    240    
96     48     
336    480    
-384   112    
96     -112   
-224   -896   
0      -704   
80     1232   
256    256    
-208   -304   
304    -80    
-672   624    
640    880    
128    864    
-224   1072   
352    -16    
-128   800    
32     -352   
-96    -400   
336    624    
256    1136   
-112   0      
-176   -32    
96     112    
128    224    
-176   192    
144    -288   
16     -304   
-304   -528   
352    16     
-256   -496   
176    240    
32     304    
-144   -384   
0      -1056  
80     -736   
-224   -112   
496    64     
272    160    
-48    128    
-736   -1760  
384    -224   
-416   464    
240    -816   
208    496    
112    -512   
-320   16     
64     528    
96     -144   
112    -864   
-160   -336   
48     -16    
0      176    
80     368    
-64    144    
80     400    
288    -272   
32     208    
-16    32     
-64    208    
-80    -400   
704    -448   
-560   784    
160    -192   
-96    496    
80     -256   
160    -304   
-64    16     
304    -272   
-48    -320   
128    -144   
-48    -32    
0      80     
80     192    
-112   112    
48     -64    
192    80     
-16    208    
64     -112   
-144   160    
272    -160   
64     48     
-352   -160   
304    112    
-416   -992   
480    160    
-64    -48    
16     144    
-80    64     
240    496    
-1344  512    
2000   512    
608    -512   
-1280  272    
464    208    
528    -544   
-176   -112   
-224   -288   
176    80     
80     -384   
-224   80     
368    144    
-240   -64    
304    -16    
32     48     
32     192    
128    -160   
-96    64     
-224   -288   
448    80     
-112   -256   
-416   -608   
-592   688    
1232   -64    
-1040  -176   
752    -80    
-64    -144   
-144   176    
-80    -496   
-80    -16    
240    96     
320    80     
48     96     
-176   -240   
-64    80     
80     -96    
80     32     
16     368    
208    720    
-432   192    
-64    -256   
336    -160   
336    -1200  
-96    -48    
-256   48     
1376   -736   
-224   -576   
480    -1744  
864    -272   
-672   32     
-96    64     
512    144    
128    -112   
32     -496   
-304   272    
-208   -368   
400    176    
640    -176   
-64    656    
-1008  224    
-288   -272   
544    -176   
-208   -944   
-144   -240   
144    -704   
256    -208   
-544   0      
64     -272   
432    -448   
-272   -768   
2336   -992   
-3648  -1136  
912    -1728  
480    128    
-512   -224   
-384   -160   
256    32     
496    48     
-384   240    
-512   48     
432    -32    
592    -2208  
-592   -96    
80     -160   
96     -32    
304    -64    
96     -48    
-32    -112   
-144   -288   
336    1120   
320    -160   
-480   -80    
208    -48    
-480   32     
272    96     
32     48     
-64    -608   
-64    112    
368    272    
-96    288    
16     -96    
-32    288    
64     -192   
-32    144    
-80    -208   
-96    32     
-32    -80    
112    0      
-96    -192   
128    -304   
192    16     
192    -272   
-80    -144   
-48    -2656  
-96    160    
352    -128   
-304   0      
128    208    
32     224    
-64    528    
496    -16    
-560   432    
-336   -80    
-752   96     
608    -384   
-528   -368   
-48    -512   
288    800    
400    192    
176    336    
208    96     
-240   0      
0      64     
144    16     
16     208    
-64    48     
-48    96     
-144   -144   
-128   -240   
48     -272   
48     -528   
-176   -496   
208    304    
-128   -432   
-64    144    
112    -512   
272    -416   
-80    352    
-192   240    
-416   224    
96     -80    
-320   -2176  
32     -32    
-432   80     
-304   16     
384    -224   
-144   -208   
208    -240   
16     -32    
-64    -256   
0      -80    
-32    -64    
-272   -64    
80     96     
32     144    
-144   528    
144    -16    
-160   -128   
-256   160    
160    -288   
112    224    
496    384    
-992   624    
864    -848   
-176   256    
0      -912   
-16    688    
-304   -48    
176    64     
48     64     
48     -224   
-304   -48    
-32    -64    
192    336    
-96    96     
-224   80     
-688   -304   
320    -128   
480    416    
-1008  -256   
-16    -368   
-288   224    
-192   272    
-464   -176   
176    -16    
-64    208    
-80    -48    
16     -160   
112    80     
-528   -96    
256    -304   
-480   -1504  
-672   752    
992    -608   
-1872  176    
144    640    
288    64     
-736   -400   
-16    -240   
-272   -64    
-96    112    
-64    -96    
-320   272    
-16    160    
-256   32     
256    288    
-288   32     
-192   -32    
224    -240   
-288   -32    
-64    -16    
-224   -96    
576    720    
720    -448   
-864   -384   
-288   768    
176    176    
-160   16     
288    2160   
624    896    
-720   -1312  
-192   -928   
560    624    
-128   640    
-208   416    
-16    -624   
64     -80    
-112   -112   
48     -368   
-624   -256   
-448   -208   
32     -352   
-432   -448   
176    320    
-48    -16    
-672   -944   
-112   -896   
1360   1712   
-1232  1056   
224    336    
80     -288   
-64    -128   
128    -368   
-736   -96    
720    -112   
48     384    
176    32     
-96    64     
-224   1056   
816    528    
-592   688    
-112   -752   
144    544    
240    -496   
304    -448   
-240   -720   
576    -448   
-320   480    
-16    272    
128    336    
112    176    
-752   -1056  
1120   -320   
1296   848    
-1616  528    
-272   416    
160    -1328  
-112   -1408  
272    -224   
64     864    
-256   16     
-320   224    
224    -304   
-16    -272   
112    400    
-96    240    
-112   192    
-352   -320   
-96    -176   
-1040  -736   
48     -528   
208    208    
32     400    
-128   80     
-752   160    
1136   -528   
-880   -1184  
0      -464   
96     -432   
-208   336    
-64    -144   
224    384    
-16    512    
48     -16    
-288   -592   
176    384    
-304   -192   
96     -80    
288    -368   
-512   96     
128    112    
272    448    
16     -16    
128    -48    
-32    96     
240    656    
16     848    
-48    480    
512    640    
-736   -304   
-144   -592   
-160   -464   
464    912    
-288   592    
-272   -832   
-320   -640   
224    -1136  
208    -496   
-80    -928   
32     -512   
-304   -752   
256    -720   
-208   -496   
32     112    
16     144    
-336   208    
400    240    
-192   -160   
224    -256   
-384   -528   
160    -640   
-176   -320   
144    96     
-16    272    
0      368    
-16    48     
-16    416    
400    640    
32     704    
-160   1120   
336    624    
-64    160    
-304   1984   
864    -544   
-1008  560    
-112   -16    
240    16     
272    80     
0      -96    
-144   352    
160    -336   
-32    144    
208    32     
-256   208    
16     -128   
32     432    
256    -32    
0      336    
-112   64     
-32    -208   
144    256    
-80    16     
-176   -416   
832    16     
-608   32     
-240   -48    
1296   240    
-1200  -16    
256    96     
240    -48    
448    -384   
-368   400    
-208   240    
0      112    
128    0      
96     0      
112    -16    
-16    144    
-96    32     
-112   224    
240    48     
48     192    
-80    64     
-208   240    
256    16     
64     176    
48     0      
-304   192    
208    272    
-32    -64    
-32    64     
-256   -128   
-64    896    
640    -96    
-208   -224   
-64    256    
-288   144    
112    80     
-112   -224   
240    -208   
-80    48     
-384   96     
272    128    
192    64     
80     32     
-128   -192   
-720   -16    
768    144    
-368   64     
304    96     
-240   -256   
32     -320   
176    192    
-128   -1600  
-1232  544    
1424   416    
-1392  64     
32     96     
928    48     
-912   -112   
352    -192   
-32    -80    
48     64     
96     0      
0      160    
-48    -16    
48     -96    
-64    144    
48     -112   
128    480    
96     192    
176    144    
-144   128    
-128   48     
496    -368   
-288   208    
240    -176   
-256   496    
304    480    
304    128    
320    528    
208    144    
-480   96     
80     -848   
112    -192   
96     -368   
-352   -96    
416    224    
160    240    
-544   256    
272    -400   
-272   48     
288    -96    
144    64     
-32    144    
-48    288    
256    -208   
-32    288    
0      -368   
-336   128    
16     -352   
-48    -720   
2736   2224   
-2912  1088   
432    -512   
1584   0      
-496   -160   
-624   224    
272    -144   
48     144    
64     -624   
-560   -80    
464    -16    
-528   64     
544    64     
96     -48    
-160   32     
-112   -976   
384    80     
-96    -64    
-176   -144   
448    -80    
32     -560   
-32    -224   
16     32     
-576   144    
-128   -432   
672    160    
-368   -640   
224    -112   
32     -832   
16     -64    
192    -16    
-48    0      
-48    -160   
-160   80     
288    -528   
-416   -544   
368    -128   
-224   -256   
16     -96    
144    -160   
-64    32     
336    -496   
-320   -208   
0      -112   
288    800    
224    128    
-768   -1280  
112    -1104  
32     -256   
-32    -192   
272    528    
-64    800    
-320   192    
256    -288   
64     -384   
0      -96    
-64    -496   
-320   -416   
320    -208   
128    -80    
0      -208   
16     -752   
-112   176    
-128   128    
480    -528   
-384   -432   
-176   -368   
-320   -416   
96     -784   
368    -224   
0      432    
-112   -112   
-32    144    
0      -48    
176    -64    
-112   -624   
80     -432   
-96    32     
288    -464   
-16    528    
-704   -144   
960    448    
-1248  1280   
336    -752   
832    -656   
112    -192   
-384   -96    
-80    944    
464    -464   
-208   -64    
16     128    
-224   176    
-160   0      
224    -128   
176    -256   
-512   64     
-64    -64    
32     -128   
160    -352   
-48    -48    
-96    -464   
192    480    
32     -3040  
112    -208   
304    -320   
-336   -320   
-80    32     
352    192    
320    336    
0      304    
-336   -240   
-48    -256   
-800   96     
64     -96    
-48    48     
96     -384   
-208   -336   
208    -672   
240    -112   
-128   -128   
-160   208    
-240   0      
320    -192   
-32    128    
32     -208   
-256   208    
480    80     
-432   224    
224    -272   
128    -192   
0      -288   
1680   672    
-1872  1152   
0      240    
112    -1872  
-16    304    
-16    352    
64     96     
384    256    
0      416    
368    416    
144    -320   
-96    -496   
96     -112   
-208   320    
208    160    
112    -368   
-96    -272   
-352   176    
672    32     
-96    96     
192    -256   
-800   80     
1376   -544   
-672   -544   
-208   -368   
592    -256   
-464   -304   
-544   -1584  
-192   -464   
800    992    
-320   1072   
528    464    
288    112    
-448   -464   
0      -64    
176    320    
256    -32    
-528   -496   
-144   -336   
160    160    
112    160    
-16    0      
64     16     
-496   -224   
352    -96    
672    384    
384    560    
336    336    
-176   1408   
608    640    
48     96     
-128   -336   
128    -80    
320    544    
-624   576    
464    384    
-208   -160   
320    352    
-1680  288    
48     224    
-96    48     
-32    -48    
128    -80    
-304   96     
448    -160   
-528   -176   
272    -560   
-144   80     
128    -176   
112    -128   
-416   -912   
720    -784   
720    -128   
-144   80     
-944   672    
560    320    
208    -1344  
-640   -624   
-1152  128    
-256   -112   
528    224    
192    -16    
-528   208    
-992   32     
48     -144   
832    144    
-32    64     
-384   96     
16     384    
-112   320    
320    -560   
-432   -160   
-64    -176   
-96    32     
-560   -96    
848    272    
-432   -48    
-272   -48    
176    -32    
80     -96    
-256   -256   
-64    -464   
-96    16     
96     496    
-64    -32    
128    32     
208    -16    
-288   -48    
80     128    
64     -16    
-48    112    
-96    96     
-80    288    
96     208    
-192   176    
-560   32     
0      -736   
-1232  -976   
176    -304   
96     -192   
32     128    
-272   -240   
432    -80    
448    368    
-352   256    
48     304    
-272   -64    
32     -128   
432    16     
-176   48     
-304   48     
-16    112    
80     96     
-192   160    
-80    0      
336    80     
-80    -96    
-320   48     
128    80     
32     -608   
-448   224    
192    16     
-64    208    
-112   16     
32     -16    
-400   -448   
640    240    
-208   320    
0      -80    
-16    160    
-96    -48    
1264   2816   
-2624  -368   
-32    -64    
1168   32     
-656   -224   
80     16     
-16    112    
64     208    
-160   80     
96     -96    
-96    224    
-432   -16    
304    -80    
-752   -176   
-176   320    
176    368    
-336   -16    
240    16     
80     80     
-80    160    
-176   176    
496    1264   
656    -80    
-672   96     
-368   96     
64     16     
128    16     
-64    -128   
-144   80     
-320   -528   
64     64     
112    80     
160    -32    
-336   112    
272    -112   
-224   384    
160    64     
-320   48     
256    48     
-368   -96    
80     176    
160    16     
64     176    
-176   -48    
-336   -32    
480    224    
-112   -128   
-160   192    
288    32     
-336   96     
-688   -1440  
1232   -608   
-272   -144   
-848   128    
752    128    
-320   -48    
-112   -32    
160    240    
-48    0      
64     0      
-16    96     
-32    0      
-112   128    
224    208    
-144   80     
176    240    
-32    16     
-304   -112   
256    176    
-160   -32    
-64    112    
512    768    
-208   -416   
-1312  288    
1152   176    
-640   -48    
-336   192    
368    16     
192    -32    
-496   160    
112    16     
336    80     
-272   96     
-240   32     
448    144    
-272   48     
-176   -48    
48     48     
0      112    
80     48     
-240   144    
64     48     
-256   -528   
-496   208    
560    32     
-400   -80    
64     192    
192    336    
-736   304    
464    -528   
-160   528    
-224   160    
-144   128    
-176   64     
112    192    
-64    480    
-400   16     
-192   -80    
480    16     
176    224    
400    0      
-288   224    
64     112    
-192   80     
0      -32    
208    336    
-112   -16    
-304   96     
448    -16    
-144   -32    
192    -672   
704    -2208  
160    848    
752    256    
-1616  48     
-32    272    
1168   -144   
-416   240    
208    -96    
-464   -64    
16     112    
288    224    
32     -48    
128    336    
-176   -208   
192    416    
-496   0      
288    128    
-336   -112   
176    -624   
-112   -16    
-16    400    
32     80     
-224   192    
480    16     
-576   -784   
656    384    
128    -240   
-144   448    
-64    592    
160    848    
496    256    
-224   256    
-448   -144   
352    880    
576    304    
-208   -64    
-592   -704   
352    656    
192    608    
-96    512    
224    304    
-144   -784   
-128   0      
96     -64    
272    -64    
208    272    
-208   128    
-144   -496   
432    352    
-80    608    
-208   80     
512    -544   
-480   -176   
224    -864   
-368   -560   
0      -32    
464    -800   
-32    -1632  
-32    96     
32     496    
-16    256    
16     -112   
48     272    
112    192    
-496   -688   
272    96     
0      160    
64     160    
96     -80    
-160   160    
144    16     
128    0      
-96    48     
128    -480   
-224   -112   
224    224    
48     320    
-32    -16    
144    -48    
-32    0      
-400   192    
384    464    
304    192    
16     80     
-368   320    
400    32     
-80    160    
336    -176   
-112   208    
-240   224    
32     240    
160    -16    
0      96     
-80    128    
176    16     
-16    64     
336    -80    
-80    16     
32     208    
-48    -96    
576    624    
-672   80     
304    -240   
608    -528   
-336   272    
0      -2016  
64     352    
-224   336    
176    48     
240    -256   
128    112    
112    432    
-192   -80    
112    0      
0      -48    
288    256    
-384   -64    
80     16     
16     368    
-64    224    
48     -192   
336    -176   
-48    -80    
-192   16     
128    -352   
320    0      
112    128    
48     -208   
432    304    
-256   464    
1168   1760   
-576   640    
-1808  -464   
2112   -16    
-448   688    
-576   528    
384    688    
560    64     
96     -944   
128    496    
192    -208   
-240   144    
32     -576   
352    480    
-288   -320   
16     240    
288    -352   
-144   736    
368    368    
-144   -256   
112    -480   
-480   384    
1776   -336   
-880   -672   
224    32     
-496   -576   
-352   -560   
-320   -1920  
16     -1680  
272    -1744  
-416   -1152  
512    -144   
-16    256    
-256   192    
32     -1280  
64     96     
48     -1056  
-176   -784   
-320   -416   
128    -64    
48     -496   
16     -528   
128    -32    
96     416    
-64    -576   
-80    -592   
-64    416    
656    -176   
-240   48     
464    -368   
-80    -80    
80     0      
224    128    
192    -16    
-96    -48    
-80    -464   
-480   32     
560    48     
-432   -320   
-96    192    
736    -96    
-64    -160   
-80    -2400  
-240   -800   
-16    160    
128    96     
-640   208    
112    32     
-224   -16    
592    960    
192    144    
624    -1408  
-528   384    
976    -48    
-1488  -32    
32     592    
272    -624   
816    -144   
-112   -464   
0      -32    
32     112    
192    144    
240    -16    
-288   -192   
-144   -112   
128    0      
-80    16     
304    -32    
-560   -480   
464    -736   
64     -1616  
160    -416   
144    16     
-464   -32    
-16    -1296  
688    -48    
-224   -48    
208    -272   
-64    128    
336    -272   
-64    96     
16     -304   
-240   -176   
32     16     
-1024  -80    
48     16     
64     -144   
352    -16    
-256   16     
-464   -1504  
480    128    
128    -64    
-128   32     
64     16     
-528   -192   
384    304    
-112   192    
-256   240    
96     -144   
-128   -288   
176    -192   
-160   64     
304    736    
832    0      
-512   -64    
-160   224    
240    272    
-32    144    
-16    -32    
-32    80     
0      -48    
-48    0      
240    128    
0      144    
112    160    
144    80     
-80    -272   
-96    -736   
128    -240   
-176   -192   
336    -64    
-752   0      
-16    -160   
-16    64     
64     32     
-32    160    
-80    32     
288    -240   
-128   272    
-64    -32    
32     -432   
208    -1760  
-1920  1600   
1616   320    
-496   -288   
-96    -240   
48     -192   
-256   -192   
-352   48     
352    272    
224    -32    
-176   64     
-496   -32    
208    16     
48     112    
-240   -224   
160    -16    
-256   160    
-80    -96    
-176   -320   
-432   192    
-352   -512   
480    -384   
-432   304    
-768   -112   
128    80     
-96    -176   
-144   112    
-112   128    
320    -128   
-448   240    
272    -48    
32     -240   
224    16     
-304   48     
32     64     
-64    112    
32     432    
0      -32    
-208   224    
272    -96    
-624   -80    
-48    16     
48     16     
224    32     
-96    -256   
112    48     
-352   -32    
208    96     
32     96     
0      112    
-1216  -2512  
864    -944   
-32    -80    
-1120  368    
496    160    
208    192    
80     -336   
-656   -816   
96     -448   
-224   -208   
240    256    
-48    16     
-224   64     
32     32     
416    96     
-592   -48    
176    48     
-256   16     
-192   -48    
256    192    
-320   0      
464    944    
-1504  -848   
-528   224    
896    -48    
-576   112    
64     -96    
-32    32     
64     320    
-496   0      
96     -80    
0      32     
-176   96     
-112   32     
160    176    
-528   -256   
-144   144    
-368   -256   
-48    -160   
16     -64    
96     224    
-128   -48    
-96    -384   
-528   352    
864    -112   
-1152  208    
656    112    
368    208    
-720   -64    
128    80     
32     160    
64     -64    
-192   128    
-192   32     
-608   -336   
368    48     
16     -208   
-48    64     
-416   320    
240    -32    
-16    -112   
-80    48     
-336   320    
640    -256   
-64    96     
48     176    
-336   608    
176    -192   
128    128    
-1008  16     
-1408  -48    
1744   0      
144    -240   
-880   -192   
-672   192    
448    112    
208    -48    
64     1376   
416    624    
-656   224    
-352   528    
448    -128   
-32    -128   
80     288    
-432   128    
48     96     
-16    16     
80     112    
64     -96    
-80    -480   
-400   -880   
256    -144   
128    192    
-288   -96    
80     -1008  
48     -304   
208    -240   
-208   -624   
-128   -944   
-48    560    
112    -240   
16     32     
-64    64     
-400   -16    
352    160    
112    544    
0      224    
144    320    
-368   -480   
-48    -304   
240    416    
-144   176    
-224   -192   
-16    592    
16     304    
304    -960   
-144   -128   
-224   -400   
-80    -160   
96     656    
96     -16    
-368   -288   
-272   816    
1360   -656   
-720   -224   
160    -304   
304    -176   
-192   -960   
304    736    
-480   320    
64     -128   
160    96     
-16    208    
112    16     
-192   480    
-96    80     
32     32     
-176   144    
96     0      
432    16     
-192   16     
224    112    
-48    -64    
144    16     
-96    112    
144    128    
176    64     
32     144    
-400   240    
128    208    
96     16     
-176   64     
352    848    
288    240    
-224   -80    
-240   256    
-128   32     
256    256    
-288   368    
48     160    
336    -352   
192    96     
-64    256    
64     -16    
-48    -112   
304    -96    
80     16     
-48    240    
-128   -112   
-144   -96    
160    80     
-48    128    
512    304    
48     128    
-416   48     
-16    288    
224    96     
-144   -240   
0      -240   
208    32     
-32    368    
-96    16     
-48    -32    
352    -224   
0      112    
-80    16     
160    -112   
0      80     
80     -48    
-144   192    
352    -864   
-128   -320   
64     320    
96     32     
320    -48    
-272   -48    
-128   80     
96     384    
-160   -32    
-144   32     
656    -272   
-224   -1040  
1632   -416   
-1664  48     
1056   544    
416    1536   
-864   368    
432    144    
320    -144   
-208   176    
-128   -208   
-96    -736   
176    -480   
-32    -336   
-112   96     
0      144    
176    -96    
-80    128    
-48    336    
112    48     
288    192    
-208   -240   
608    528    
-1840  384    
704    256    
-560   -1440  
-560   -1744  
288    -400   
-176   -896   
608    240    
-16    800    
-32    288    
96     80     
-96    -240   
0      208    
352    -688   
-464   -48    
48     192    
192    96     
16     -64    
48     176    
-160   -448   
-64    48     
32     208    
-48    -560   
-688   432    
848    -336   
-624   -112   
288    16     
576    -64    
608    -688   
-128   272    
-336   432    
544    -48    
-16    -16    
352    160    
128    160    
-368   -432   
-608   240    
-416   -320   
48     -320   
368    -64    
160    32     
-208   192    
144    208    
-128   -272   
-32    320    
144    -1344  
-32    16     
224    16     
-144   112    
112    1856   
352    3424   
1008   832    
-1344  -112   
-400   -80    
496    -208   
304    128    
64     -304   
-240   240    
-32    -304   
-432   496    
304    -32    
-160   192    
-64    -144   
144    128    
-32    -128   
256    256    
256    -16    
-128   -96    
-240   -672   
-560   -224   
784    -128   
-512   0      
304    -160   
432    -48    
-208   48     
-624   -800   
1104   -16    
-336   224    
16     272    
-288   -32    
96     -112   
352    464    
-384   -32    
240    288    
288    -352   
-256   384    
304    16     
-784   128    
1056   -80    
-176   16     
-16    144    
-144   -592   
-112   -16    
576    -640   
-336   -1376  
368    -16    
-48    -144   
112    -16    
496    -416   
-256   -32    
-96    416    
240    -560   
-1008  32     
784    0      
-752   -16    
400    32     
352    -16    
-96    112    
112    -128   
32     -160   
-64    16     
48     -384   
-144   -304   
64     -688   
160    112    
-176   -1536  
16     -384   
-256   -240   
192    368    
592    -112   
-224   -96    
80     48     
-16    128    
64     0      
-16    -16    
-240   80     
16     -240   
112    -672   
-16    -576   
0      352    
-256   -272   
496    -2192  
-1072  304    
1488   -272   
-752   -96    
-336   128    
560    848    
448    160    
-416   -976   
160    -160   
-320   272    
176    -208   
-208   112    
-144   128    
-176   -400   
80     -96    
384    128    
64     -928   
-144   -16    
-64    128    
192    192    
192    896    
736    -672   
-896   -128   
-16    0      
48     -16    
240    32     
-160   448    
96     -320   
-256   -288   
96     -352   
240    -48    
-16    -192   
-48    272    
352    -1120  
-304   96     
96     176    
80     -96    
-256   352    
544    -16    
-288   32     
0      -160   
-368   16     
208    -80    
112    64     
-176   -208   
80     144    
224    -208   
-64    96     
-80    -640   
96     928    
1616   -288   
-2800  352    
272    128    
816    176    
-976   -96    
480    -160   
96     -384   
-192   -496   
-112   -224   
112    112    
96     128    
-112   -336   
112    144    
-96    -304   
608    256    
-496   -16    
208    -48    
-400   -64    
512    432    
16     64     
-256   -256   
704    -144   
-1600  -176   
1280   -256   
608    352    
-464   784    
16     -464   
208    -112   
192    -336   
-48    -208   
-496   160    
-160   -48    
496    -160   
0      -48    
256    112    
-288   80     
-80    -176   
464    -432   
-368   176    
160    16     
-48    272    
80     112    
-128   -320   
-272   -80    
-1040  96     
448    -256   
848    832    
-16    -144   
48     48     
336    -64    
-400   128    
160    224    
-176   -48    
-80    -368   
-144   -176   
-80    -16    
-496   -368   
336    480    
0      128    
-640   -992   
64     96     
-208   80     
-144   -112   
-880   192    
0      -240   
240    272    
272    160    
288    176    
-176   288    
-368   -192   
96     -2464  
-2224  -1040  
560    624    
272    0      
-144   -448   
-80    -624   
-384   -272   
-624   -1264  
640    -1152  
-288   400    
-1024  112    
-64    -256   
0      160    
416    16     
-336   256    
-160   816    
80     -416   
-192   16     
240    -192   
-48    480    
-64    240    
-128   -240   
320    160    
-288   -272   
-224   -160   
128    -512   
-496   -480   
144    400    
-64    656    
352    -16    
-288   528    
-32    64     
-304   -128   
-16    -1088  
-288   -1072  
-16    -144   
-464   -128   
416    416    
96     -400   
-496   -432   
-192   32     
-272   -272   
-416   -192   
-80    -208   
160    -288   
-256   704    
448    -32    
-400   96     
-48    -320   
80     -64    
-304   80     
880    0      
-272   96     
-416   -32    
112    208    
-560   528    
-80    -608   
-640   -1200  
704    448    
288    512    
-16    368    
-160   -352   
176    -16    
192    256    
-112   32     
-160   208    
-272   16     
320    -16    
32     96     
80     80     
128    -64    
-144   240    
-176   16     
48     48     
128    176    
-160   80     
-176   336    
-80    384    
-16    -16    
160    -16    
-80    112    
-592   224    
720    -336   
-896   48     
512    -256   
-32    -176   
336    80     
-432   -368   
272    -736   
-1344  -480   
160    64     
112    48     
0      256    
-64    -32    
112    32     
-16    -176   
-16    240    
64     544    
80     208    
-160   224    
-432   -480   
896    -528   
-304   320    
112    -240   
32     -96    
-592   -80    
-16    544    
384    448    
160    -736   
-160   80     
-400   704    
160    288    
576    -416   
-336   384    
-208   -160   
-16    -240   
240    576    
192    -512   
-240   656    
-64    -304   
48     448    
176    -128   
-16    -80    
-176   -160   
80     112    
32     96     
-16    224    
-32    -144   
-208   16     
-256   -304   
496    720    
272    384    
-1184  432    
1136   240    
-672   -32    
496    512    
-96    224    
32     576    
208    416    
-16    464    
16     128    
-288   208    
352    -96    
-144   208    
-368   160    
96     208    
160    32     
-112   240    
16     288    
224    0      
-176   -16    
-64    -672   
1280   336    
-832   384    
208    -464   
-496   272    
432    -64    
-496   -320   
720    368    
96     48     
-464   -112   
352    272    
-144   96     
64     -32    
80     224    
-368   16     
224    128    
48     96     
64     0      
-48    -64    
-448   176    
48     176    
-208   16     
656    -256   
-368   208    
96     -400   
-32    -32    
-432   -896   
-512   -176   
432    720    
288    352    
-64    -96    
0      -80    
-352   96     
-272   -32    
912    656    
-624   288    
-768   128    
0      400    
-336   160    
704    -320   
-176   -48    
-448   112    
48     352    
560    -32    
-144   224    
-144   -272   
-816   256    
736    -16    
-208   -32    
-256   1200   
2048   1856   
544    -336   
-1712  -304   
224    112    
768    -192   
-48    -352   
-368   32     
48     224    
-96    -256   
176    272    
-48    -48    
-112   -64    
448    192    
112    32     
32     160    
-432   96     
272    128    
288    -144   
-592   -400   
-32    0      
80     -912   
-336   -48    
624    -368   
560    -80    
64     -112   
-176   304    
352    336    
-128   288    
112    64     
-192   -128   
-368   -48    
272    -80    
-176   176    
112    32     
400    224    
-96    -432   
-400   -16    
384    -256   
-928   208    
544    112    
-240   16     
144    112    
-224   -32    
-128   -272   
336    16     
112    112    
240    -32    
-176   -16    
-176   16     
80     416    
256    32     
-224   -16    
256    -336   
-336   272    
240    -1328  
576    80     
-96    -880   
-336   336    
112    320    
400    160    
-128   -16    
-192   192    
176    160    
144    -112   
-48    96     
-128   -272   
176    96     
368    -320   
-272   256    
208    -640   
-48    -240   
-48    240    
208    432    
112    64     
0      144    
-272   16     
400    144    
80     240    
32     80     
-80    96     
80     304    
-192   -2080  
-1040  496    
1760   -144   
-800   -240   
-256   128    
176    0      
272    -48    
400    96     
-336   544    
80     -352   
48     128    
208    176    
-48    -192   
16     720    
16     -528   
160    -80    
272    -224   
-96    0      
80     -272   
-32    224    
112    848    
816    -368   
-720   176    
176    464    
-64    64     
160    -240   
-32    -656   
48     -400   
48     240    
0      -144   
160    208    
-32    -240   
112    128    
64     -80    
32     64     
-128   0      
144    48     
0      48     
208    -2400  
16     144    
-48    -272   
128    -1008  
-16    64     
192    256    
-272   -32    
256    320    
48     -400   
96     160    
-80    -160   
32     -48    
1360   -192   
-2000  -208   
1376   48     
0      112    
-432   -160   
272    240    
-48    -16    
432    272    
16     -416   
-112   -128   
96     -96    
-16    -304   
80     16     
-128   112    
416    -32    
-224   112    
-64    -448   
-176   -144   
256    -208   
64     -16    
112    704    
-1616  368    
448    112    
-128   128    
48     -384   
32     -512   
32     80     
528    720    
224    144    
-208   -752   
-560   -32    
160    -48    
256    64     
-112   -208   
-32    -224   
0      16     
-288   -256   
592    -464   
64     -144   
-112   224    
-112   -240   
32     128    
352    -2640  
48     -112   
-48    -176   
80     -480   
-144   288    
-880   1344   
128    432    
-416   0      
-448   -224   
16     -400   
-1120  -304   
-96    192    
432    -96    
-240   -1200  
-48    16     
-240   -416   
-288   -160   
176    304    
48     224    
16     -224   
-176   -288   
-80    -224   
96     -176   
432    688    
368    480    
-288   -240   
0      16     
0      -208   
256    336    
960    -400   
-832   -816   
2080   -416   
-752   -1168  
-704   -96    
624    304    
336    496    
-336   -240   
-208   176    
160    -400   
96     416    
32     -208   
112    -416   
-496   352    
144    -304   
-352   -192   
208    -16    
-240   320    
288    -2064  
-80    656    
-112   576    
464    144    
0      -112   
-96    -160   
-112   1312   
-432   -48    
-352   -1120  
752    832    
-320   688    
-48    -176   
-288   -80    
240    -272   
48     -528   
96     -1024  
64     64     
-352   400    
176    928    
80     -1008  
64     96     
-336   -64    
192    384    
-272   -656   
224    192    
80     -720   
-208   -768   
240    496    
304    -528   
96     -576   
-192   128    
-176   16     
-96    -528   
320    -1008  
-256   -224   
-320   -48    
480    144    
416    -176   
-160   -320   
-272   -240   
-688   192    
144    -160   
208    128    
-112   -96    
-224   192    
-160   224    
-176   208    
-544   -368   
-624   192    
176    176    
-304   -336   
384    -112   
-112   32     
-32    -128   
48     -336   
96     -320   
-176   64     
96     80     
-144   -624   
96     432    
-160   32     
-96    -192   
-304   1184   
496    -416   
-704   -64    
-144   144    
-192   80     
320    400    
64     -688   
-976   -352   
32     0      
48     480    
320    -144   
-256   -256   
-64    560    
-144   -80    
-16    -32    
96     -208   
-192   -80    
-48    96     
-384   80     
160    16     
-592   0      
400    -480   
-400   1120   
80     -256   
176    -272   
16     544    
-432   -272   
-16    192    
64     -112   
64     -240   
-240   96     
-144   -48    
128    -528   
-256   -16    
32     -208   
-416   -112   
128    192    
32     -16    
-64    160    
-48    -272   
-16    16     
-128   -160   
32     208    
-64    208    
176    400    
208    144    
-192   -48    
-32    48     
224    -80    
-512   -1568  
1632   -256   
-864   352    
-784   -320   
1152   368    
-448   -192   
-624   144    
752    480    
-64    176    
-96    0      
-48    0      
-32    80     
-112   -64    
48     160    
224    32     
-448   64     
144    -96    
-128   288    
-688   0      
112    224    
80     -96    
-80    144    
-448   -816   
-144   80     
1152   -192   
-1408  48     
960    64     
-176   -48    
-160   160    
336    -288   
-816   112    
288    -48    
32     160    
-336   -64    
-352   32     
240    -16    
304    96     
-112   192    
-128   160    
256    -256   
-368   240    
-224   48     
32     256    
-704   512    
608    -400   
32     224    
-112   528    
-16    80     
480    192    
384    -256   
192    -304   
224    -16    
-496   112    
336    224    
-32    320    
-336   320    
192    512    
272    720    
224    544    
176    704    
-336   112    
-608   80     
-48    160    
64     -80    
304    -208   
-464   -80    
224    -80    
-176   -304   
-448   16     
-32    112    
-496   -1504  
-1968  -16    
896    656    
-800   -304   
-32    -144   
688    144    
-336   272    
-864   -64    
-400   -224   
1232   256    
336    -128   
-272   64     
-176   128    
64     192    
416    32     
32     224    
-208   -32    
-208   224    
288    -32    
-304   -160   
864    -960   
-784   16     
816    32     
-720   16     
560    192    
-176   16     
-544   16     
992    -496   
-608   -16    
368    -48    
-96    272    
144    16     
-48    128    
208    96     
-352   -64    
384    48     
-288   -256   
80     160    
704    128    
-80    64     
64     160    
-32    192    
448    224    
-128   -16    
304    -160   
-80    544    
-288   368    
272    144    
16     32     
-320   16     
224    -64    
-400   -176   
544    512    
-896   368    
480    -576   
-160   -384   
-352   0      
368    112    
-208   -32    
256    -64    
128    48     
16     -144   
-112   -32    
-32    128    
96     -48    
-112   96     
0      0      
32     -1376  
80     256    
32     576    
-96    464    
192    352    
64     -32    
112    96     
80     272    
-32    80     
-160   272    
160    288    
-144   464    
256    -16    
-64    -80    
-528   -720   
1744   336    
-480   224    
-704   352    
320    -656   
-608   208    
576    256    
96     -48    
112    80     
-608   80     
272    -80    
288    -320   
16     -256   
-304   80     
48     -112   
144    32     
176    416    
-160   480    
-112   256    
32     -48    
192    64     
-208   -1072  
176    -1072  
256    624    
-64    544    
-144   448    
176    -400   
32     -256   
0      176    
32     -144   
-32    272    
-16    -304   
64     -96    
48     -80    
-128   64     
352    32     
-16    96     
-400   240    
0      304    
144    368    
-128   96     
16     -240   
-16    272    
-112   208    
-64    -448   
48     80     
-112   -160   
144    -144   
-176   64     
32     -192   
-352   96     
240    560    
1408   480    
-1488  -304   
944    -256   
400    144    
-544   -672   
944    -736   
176    1568   
-16    688    
-256   272    
256    -160   
208    32     
-304   -816   
400    -128   
32     -1184  
-400   176    
64     -32    
368    160    
-288   736    
96     368    
608    784    
-1072  -576   
-496   352    
1456   1248   
-320   -16    
-240   -944   
336    -288   
-160   448    
128    864    
256    528    
176    -48    
-352   -416   
48     -240   
128    64     
-16    560    
-224   176    
192    160    
96     736    
304    1008   
0      736    
-48    -320   
-64    -144   
256    -1008  
384    1136   
640    80     
-64    -48    
160    0      
240    368    
144    -1328  
-656   -1280  
496    528    
-224   112    
-80    -64    
96     -608   
544    -160   
-352   -240   
352    336    
-720   32     
240    480    
-192   -608   
0      32     
512    -400   
16     336    
-320   240    
-32    112    
-368   112    
64     208    
384    96     
-368   -96    
-336   384    
-80    -112   
1536   -656   
-320   16     
1168   -496   
-224   -976   
-656   -1040  
400    -256   
800    1904   
-112   48     
-576   -272   
-64    -992   
96     176    
96     -368   
240    -640   
-112   112    
-240   80     
32     16     
16     96     
-80    240    
320    352    
-192   80     
-16    -288   
-160   -336   
800    144    
-112   224    
-400   -96    
128    480    
-96    -768   
320    -1264  
-96    176    
16     352    
96     -240   
-16    16     
-48    160    
480    176    
-112   16     
-336   96     
272    -1344  
256    -112   
-320   784    
-16    -160   
-160   -80    
-32    -16    
240    96     
-176   -1392  
-336   -544   
352    48     
-176   448    
48     608    
-32    -544   
176    -336   
-432   496    
1024   -224   
-416   -368   
-304   416    
464    -112   
-32    -80    
-176   320    
144    1040   
80     176    
-32    -192   
64     -944   
192    -64    
-144   -2336  
160    -144   
80     -96    
0      -16    
112    -336   
384    -64    
-448   32     
192    288    
-224   240    
96     -48    
-992   304    
0      -96    
-48    -96    
128    -256   
-96    -688   
0      -480   
0      512    
-448   -864   
928    -1424  
-576   272    
992    -672   
-864   608    
224    -144   
32     416    
0      816    
-32    -272   
-240   -384   
144    -144   
96     -96    
64     -48    
-48    -720   
-144   320    
-32    -32    
64     -672   
0      -544   
-96    -400   
-176   64     
48     112    
-240   -416   
640    -560   
-768   32     
288    144    
-560   16     
-48    304    
256    144    
-240   -304   
-48    144    
80     -1648  
48     -32    
32     144    
48     112    
-192   32     
352    64     
-224   -64    
192    80     
-464   -192   
336    -96    
0      -48    
-96    -16    
304    112    
-384   -208   
384    64     
-240   -448   
-240   -16    
336    192    
-240   112    
-64    -64    
880    1504   
1920   160    
-2464  272    
-432   -912   
1472   -656   
656    416    
-1472  -32    
96     320    
592    128    
-384   -320   
192    48     
-80    -128   
16     256    
80     -192   
-336   176    
160    -48    
-240   80     
-112   -176   
16     48     
368    -64    
-304   144    
-208   -336   
528    256    
1824   -432   
-1392  368    
-608   224    
448    -16    
-336   -192   
-384   -288   
208    0      
32     192    
16     -16    
-192   32     
-80    96     
-864   -576   
-272   208    
64     -48    
-400   -464   
208    -464   
64     -192   
-352   -16    
-160   80     
272    752    
-1136  -304   
416    368    
624    64     
-160   960    
272    528    
-336   400    
176    -96    
432    432    
288    16     
-16    160    
-112   48     
112    0      
192    304    
-144   -16    
96     -144   
736    656    
-304   192    
-176   -112   
384    -64    
-688   96     
48     -128   
-304   -16    
-48    -192   
720    -64    
-16    -64    
80     -128   
256    96     
32     -400   
-1808  3056   
1888   -336   
-1200  624    
-32    -432   
-384   -208   
384    544    
336    16     
-368   592    
-256   96     
0      288    
528    -144   
-144   0      
80     80     
-304   96     
448    240    
-432   32     
96     144    
-224   -128   
0      320    
240    -544   
-320   352    
416    -192   
-656   80     
64     32     
80     128    
-144   48     
208    -16    
-368   -144   
544    -336   
-240   -320   
-64    -128   
-16    144    
64     80     
256    160    
-288   400    
224    256    
-384   -16    
512    -48    
-128   -448   
32     0      
96     -32    
-368   80     
528    144    
-96    304    
256    96     
112    48     
-16    -64    
-192   -240   
-80    -96    
224    -96    
-128   112    
176    416    
-704   496    
544    784    
-256   1216   
16     304    
-272   -336   
-128   -704   
-32    -672   
224    -144   
0      -160   
64     -112   
-80    80     
32     192    
-384   -240   
144    -272   
16     -48    
160    48     
-208   -48    
160    -16    
16     240    
400    784    
-576   944    
528    272    
-16    -32    
208    336    
-448   384    
-288   -336   
144    -800   
0      160    
-32    336    
-336   1888   
1232   -144   
-1072  480    
176    656    
528    272    
-480   -992   
96     -528   
-144   1280   
256    -912   
-192   496    
112    160    
-96    -32    
96     224    
240    160    
-64    -208   
-224   64     
80     144    
-112   -16    
96     -144   
-48    32     
-208   256    
384    48     
-160   752    
-464   496    
288    96     
336    -400   
-304   400    
-80    336    
288    80     
32     -288   
-96    64     
-64    432    
-128   -48    
-64    384    
192    -128   
-368   192    
-16    -224   
496    -544   
32     336    
-256   400    
48     80     
16     -144   
96     176    
96     -32    
-336   240    
48     272    
-144   144    
0      -176   
304    64     
0      192    
-1216  -832   
640    1264   
1104   -224   
-1488  128    
608    304    
624    -272   
-672   128    
16     608    
240    -512   
48     208    
-192   64     
32     96     
-80    160    
-48    96     
208    16     
32     64     
-64    208    
96     -64    
432    -64    
0      16     
-224   -112   
976    -848   
-1088  160    
736    576    
-336   -128   
-176   0      
736    1280   
-528   1344   
96     -1072  
176    -912   
-160   352    
0      704    
128    -256   
208    -544   
96     960    
416    48     
-368   32     
400    240    
-640   -192   
160    192    
224    80     
-112   -1264  
336    736    
336    832    
-48    928    
-208   848    
304    112    
32     2192   
1360   1424   
-208   864    
64     -272   
528    -96    
-112   -240   
160    -352   
-400   1264   
1008   -224   
144    304    
704    784    
-32    384    
-96    688    
592    416    
-96    32     
288    48     
-272   48     
208    240    
144    -48    
-512   -272   
-384   -448   
-80    -224   
144    -48    
-80    336    
1088   -992   
-32    -128   
832    -304   
-1056  592    
-400   64     
640    -368   
-192   -960   
16     -496   
-144   784    
208    -80    
304    -304   
160    96     
-592   -544   
16     560    
288    -112   
-64    -640   
-16    0      
-368   -224   
368    512    
320    928    
176    576    
-64    -80    
-736   112    
240    -704   
176    16     
48     912    
256    576    
-448   -48    
192    400    
96     -48    
0      -384   
288    -192   
32     448    
240    208    
-16    -368   
-128   -80    
480    384    
-256   0      
-192   -304   
224    -432   
-256   -160   
64     96     
32     352    
224    112    
32     1104   
448    400    
96     720    
128    32     
-80    -224   
-32    -304   
784    1232   
-608   112    
-480   -16    
880    -32    
-272   160    
176    432    
160    352    
-48    368    
256    -496   
-288   -16    
128    -96    
-96    48     
128    -416   
48     -16    
32     32     
-16    624    
368    240    
16     896    
368    256    
64     400    
-112   304    
176    224    
176    176    
-256   -272   
-96    96     
432    -288   
176    448    
-304   64     
32     80     
176    -80    
-16    1792   
1552   -736   
-1488  416    
288    -112   
80     240    
384    16     
-336   -160   
128    80     
240    -352   
-128   240    
224    -144   
-144   128    
-128   16     
192    -288   
64     -384   
416    528    
-144   -96    
-272   -944   
368    -96    
48     -368   
688    160    
-1392  80     
560    -1456  
448    -144   
-688   96     
528    272    
-336   240    
112    -256   
48     304    
368    -176   
-272   112    
-192   160    
368    48     
-16    64     
16     -976   
192    -368   
-304   176    
-80    -304   
64     -192   
-48    -288   
272    0      
-384   -2800  
96     -80    
-32    -144   
480    80     
-480   -128   
176    336    
176    -112   
-400   16     
-16    -560   
-80    -768   
-752   -224   
400    -496   
-512   64     
-32    -240   
640    -224   
-640   -2656  
448    -288   
-16    16     
-128   112    
-192   -192   
224    176    
256    -160   
-224   -144   
16     64     
144    48     
-608   -32    
112    48     
432    -16    
-32    -80    
-80    112    
-144   -576   
-992   592    
1952   -1584  
-1456  -800   
-528   -32    
1616   32     
-848   -144   
672    -176   
224    64     
-288   32     
352    16     
0      64     
-912   0      
-96    -240   
-112   112    
400    -128   
-224   32     
96     -400   
128    384    
112    -32    
-144   -384   
976    208    
-336   -240   
-208   128    
704    -560   
-1088  -512   
256    -240   
-176   368    
-32    112    
368    -176   
640    -96    
-224   448    
-64    48     
304    656    
-240   -336   
-192   272    
272    32     
-496   -16    
400    224    
-304   -32    
-32    -48    
96     112    
-304   -80    
128    -192   
128    64     
592    -384   
-272   144    
384    32     
-576   -912   
832    -5552  
-2464  -1712  
2112   672    
-336   32     
-48    176    
176    -48    
-512   192    
208    80     
-48    -352   
688    -240   
-112   -48    
-256   -144   
368    128    
-192   -64    
240    -16    
80     -112   
16     -128   
-256   64     
-96    -384   
528    -224   
0      -1216  
-432   -752   
64     160    
-656   -128   
288    448    
-304   -80    
-336   48     
160    48     
0      -176   
96     464    
368    -48    
-192   352    
-192   -64    
80     48     
272    240    
-384   -32    
368    -368   
208    -544   
-304   128    
96     128    
-240   64     
192    480    
-336   768    
-1184  -160   
144    -320   
-336   -256   
-288   -784   
80     -224   
-432   32     
192    -240   
-208   -496   
496    480    
-768   432    
624    96     
-512   -48    
32     -400   
-128   -1664  
-48    -1584  
-544   -1104  
-48    -144   
-192   96     
-112   128    
48     128    
-96    144    
-240   -48    
-192   -16    
112    384    
80     -112   
-16    -112   
-368   -160   
112    352    
-192   32     
128    -304   
-160   -272   
0      -416   
-224   32     
96     -208   
-224   -48    
208    144    
48     -32    
-352   48     
208    592    
-288   688    
448    -208   
272    -96    
304    -48    
-400   80     
48     -272   
-80    -480   
-96    -272   
-48    -48    
80     192    
80     192    
-48    144    
32     0      
-208   -160   
-48    160    
-208   416    
240    224    
-32    144    
-256   64     
320    -464   
-1376  144    
912    144    
-128   -304   
-48    -496   
32     400    
-400   48     
128    -144   
112    144    
-64    64     
-240   32     
-64    -96    
-48    192    
-736   128    
240    -160   
-176   -224   
-208   16     
112    256    
224    -80    
-272   -64    
-160   224    
-304   144    
16     80     
144    32     
-64    -32    
48     -48    
-176   0      
-256   160    
112    -64    
-64    160    
-1264  -992   
336    960    
352    -672   
-1392  144    
560    960    
432    -80    
-752   864    
432    848    
-176   672    
-160   -272   
-32    -720   
16     432    
-448   128    
176    -80    
240    -240   
-64    -32    
-240   -416   
-48    48     
64     128    
0      336    
-96    -448   
1360   400    
-1920  256    
560    176    
-224   160    
-736   -352   
400    -1664  
192    -16    
16     1296   
128    1072   
-240   -624   
80     -32    
112    -272   
-128   -80    
48     -48    
-288   48     
64     16     
-64    640    
-400   416    
208    -352   
-48    -144   
16     32     
0      -64    
208    128    
128    112    
-400   784    
432    176    
64     2016   
1200   656    
-752   96     
112    -160   
320    80     
-208   304    
448    -112   
288    1328   
-912   192    
64     32     
336    720    
-96    256    
368    704    
-864   864    
256    -128   
528    288    
-608   160    
-144   96     
-592   -240   
832    -176   
64     208    
-1056  -544   
304    -576   
1776   2256   
-2032  656    
576    -32    
1680   224    
-576   1824   
-48    -80    
-192   0      
144    -256   
416    -416   
-96    128    
16     -80    
160    368    
144    -64    
272    -64    
-384   -96    
128    80     
32     16     
-352   208    
768    752    
-544   752    
96     -672   
208    -624   
16     -80    
-688   160    
272    208    
160    -96    
96     416    
-240   128    
112    176    
-96    -16    
208    304    
-144   96     
48     -64    
-176   -256   
-368   -80    
64     -160   
352    48     
-96    448    
-160   96     
-80    -16    
-96    48     
400    176    
-304   128    
192    208    
-80    -64    
-272   0      
416    -48    
352    -272   
-496   128    
112    192    
128    64     
480    1232   
-688   448    
-80    -128   
608    32     
-176   -16    
-208   160    
144    176    
-16    -32    
432    80     
96     64     
-128   -64    
-32    -1008  
-64    16     
240    48     
272    528    
-816   272    
352    16     
256    768    
-368   336    
224    -80    
-240   224    
256    -224   
-16    -208   
-80    -48    
128    336    
32     256    
352    -256   
-272   224    
16     160    
192    96     
-768   224    
2160   -912   
-1008  16     
-288   -208   
624    320    
256    304    
-576   16     
-80    192    
336    -192   
-144   80     
320    -80    
-112   -368   
-160   192    
64     -1904  
288    176    
-112   368    
32     -208   
-176   272    
160    160    
-80    288    
496    -176   
-1280  800    
800    -128   
80     -64    
-192   192    
448    -112   
-432   224    
48     0      
-240   -320   
832    -96    
-512   224    
-96    -32    
-320   -288   
768    -16    
-224   -288   
-64    32     
-16    112    
112    400    
-80    96     
-144   -16    
160    48     
-144   -128   
112    96     
0      0      
144    64     
-512   -1648  
528    32     
-240   -16    
160    80     
-464   -1520  
1904   3712   
4512   1424   
-2208  -480   
-160   448    
128    240    
416    448    
176    304    
-128   528    
976    -368   
-752   256    
128    -928   
416    224    
80     32     
-80    304    
528    192    
-336   224    
64     -48    
240    256    
-32    96     
224    -80    
0      144    
-352   -832   
32     -16    
144    -1024  
96     0      
-480   -48    
752    16     
-512   400    
-224   -160   
320    272    
80     -48    
176    96     
-48    -320   
-112   160    
32     -48    
448    48     
64     -64    
-128   368    
-32    0      
240    176    
208    -336   
-160   -112   
432    128    
192    -160   
-112   224    
320    176    
-656   96     
336    0      
112    496    
-592   0      
224    -48    
-48    -160   
560    208    
80     -48    
-160   -512   
-128   64     
288    400    
-416   -192   
384    -2160  
-96    64     
-128   -304   
160    -192   
-16    -80    
32     -592   
176    -80    
-16    -192   
560    -64    
-256   208    
112    0      
448    960    
560    1328   
-2416  -448   
1280   -176   
1120   -160   
-1248  176    
-352   1136   
112    -176   
48     -16    
208    -416   
-48    -96    
160    -368   
-224   -128   
736    -3056  
-288   80     
80     -16    
-192   448    
432    -192   
-96    224    
144    -864   
96     -896   
-256   -576   
-144   -272   
-480   448    
-560   -128   
304    -64    
48     -224   
32     -256   
112    -1872  
-192   -336   
464    880    
-176   1056   
144    -80    
32     -432   
-48    144    
144    -368   
-240   -80    
336    -32    
-176   144    
-272   0      
240    336    
96     -528   
-416   -400   
320    -1072  
-208   -944   
160    -1712  
-112   720    
384    448    
-624   -160   
-176   544    
288    -80    
-80    -64    
272    64     
-528   -832   
-528   -672   
704    80     
-288   80     
-32    128    
-176   80     
688    1344   
-288   -176   
-48    -400   
320    320    
-160   -80    
-112   144    
368    -64    
-32    16     
0      -96    
0      -16    
-144   -176   
-336   -64    
96     80     
-16    16     
-160   -240   
32     48     
48     -784   
112    288    
-368   64     
16     -64    
-48    -160   
112    -32    
48     96     
-416   -320   
608    -640   
-256   496    
144    -48    
192    -192   
-688   16     
-320   -432   
720    48     
80     304    
-192   384    
-64    -560   
32     -224   
-32    128    
320    -160   
-272   -48    
0      16     
-32    32     
272    96     
-144   -320   
-96    -288   
624    368    
-1168  352    
608    -304   
544    -400   
-352   416    
192    -432   
-416   -592   
144    -320   
-80    304    
224    -48    
208    208    
-272   192    
-240   0      
-96    -208   
368    -208   
-96    224    
-144   16     
-48    784    
192    -176   
-64    112    
-240   16     
176    -272   
304    192    
-128   288    
288    224    
-208   176    
-336   0      
208    -176   
224    80     
-304   0      
1056   368    
-3408  96     
352    368    
384    -368   
-256   160    
192    992    
-128   1040   
-240   -912   
-560   -1104  
-16    832    
-208   288    
-48    -32    
160    64     
-144   0      
-656   -320   
-32    -160   
-144   -480   
-272   -480   
0      -688   
64     352    
-80    464    
64     880    
1968   32     
-1680  832    
912    -1392  
-640   -816   
160    112    
-80    784    
464    704    
-304   -512   
144    -560   
0      -336   
80     384    
128    -32    
-416   -48    
704    208    
-208   48     
96     448    
-416   256    
-448   -96    
192    -64    
48     -96    
-112   240    
-384   -1520  
1648   -1936  
-16    -496   
-784   176    
800    608    
-160   -480   
-320   192    
576    416    
-32    0      
-272   -256   
-32    -128   
-304   304    
112    496    
928    -336   
-928   -624   
320    192    
64     -112   
528    -400   
-496   -64    
416    0      
-80    192    
-32    160    
32     -432   
-448   432    
336    0      
-384   80     
-480   -1264  
-416   -2272  
1984   -992   
352    -176   
-688   192    
-656   112    
-96    0      
-64    -480   
48     -48    
-688   208    
144    64     
144    224    
-32    -48    
-160   80     
-208   -48    
0      0      
464    80     
-208   112    
-64    48     
-160   -48    
-64    1008   
368    272    
-688   288    
400    80     
-416   -64    
-80    64     
352    16     
-192   144    
-160   128    
96     128    
240    -16    
-736   -32    
448    48     
-576   -224   
-96    64     
160    -112   
-80    48     
-144   160    
608    240    
-288   128    
64     16     
-16    -48    
368    16     
-32    144    
-64    192    
-112   48     
128    32     
224    416    
-208   96     
16     176    
112    64     
-64    48     
-32    112    
368    768    
1008   -224   
-992   -224   
160    64     
320    128    
-80    144    
-128   64     
-144   -64    
-32    -160   
112    128    
-64    -64    
160    304    
-320   48     
80     -48    
-32    64     
-208   288    
-80    -16    
528    16     
-48    16     
-176   -192   
-48    144    
-96    -128   
16     368    
0      -176   
224    352    
-288   288    
64     -144   
16     128    
16     96     
880    144    
-2416  1856   
1232   0      
176    464    
64     48     
-112   -32    
-352   16     
416    608    
-592   560    
384    -192   
-16    288    
-480   -160   
144    32     
272    208    
-320   256    
176    -112   
-144   256    
0      -32    
0      -240   
0      192    
-16    112    
-320   -624   
320    272    
624    144    
-656   0      
64     288    
-224   -336   
144    112    
496    288    
-192   48     
-64    48     
-272   96     
416    -176   
-16    96     
-16    -32    
-144   112    
304    112    
96     64     
-176   224    
64     -64    
-176   96     
80     16     
160    224    
320    32     
-208   160    
-176   -16    
64     368    
240    -96    
-16    144    
16     -176   
-960   1088   
1600   624    
-528   -128   
-832   -48    
896    384    
32     -80    
-352   -160   
32     -640   
-32    -176   
-48    112    
128    64     
288    144    
80     64     
-176   208    
256    112    
-464   160    
400    0      
-48    304    
48     -320   
-368   -256   
336    48     
-208   -656   
-368   -16    
912    -336   
-544   0      
48     32     
240    -400   
-400   304    
-128   -32    
32     32     
256    16     
176    96     
-304   80     
-144   128    
224    -256   
-240   -192   
304    112    
-224   -640   
256    400    
-256   352    
96     160    
-16    -48    
-112   32     
608    -160   
368    416    
-304   -352   
-464   224    
352    224    
-32    32     
-192   0      
16     176    
560    208    
-208   -496   
-544   384    
832    -976   
-272   -592   
-160   64     
80     416    
-144   128    
256    32     
-80    -512   
-144   128    
-80    16     
192    64     
80     176    
352    112    
-880   320    
96     -480   
240    48     
-480   -1728  
-288   -1952  
1664   -3040  
496    1056   
-416   -144   
-800   448    
32     -736   
-304   -1664  
608    320    
304    80     
-544   240    
256    -640   
192    32     
16     -160   
-48    544    
-336   -144   
304    -80    
192    272    
128    -32    
112    192    
48     464    
-160   320    
240    112    
240    144    
-416   -96    
-352   416    
240    176    
80     192    
0      704    
-16    1872   
-208   128    
176    224    
144    -976   
80     400    
-128   128    
32     -304   
64     208    
224    112    
-96    -736   
64     560    
32     960    
-48    -880   
224    -16    
16     -160   
-16    112    
-176   -528   
368    -48    
-64    672    
320    1184   
288    -368   
-112   544    
-48    -224   
-256   -352   
672    -496   
-544   -352   
544    240    
112    -160   
-96    464    
-176   -1024  
576    -144   
176    784    
-64    640    
-224   -480   
48     256    
208    448    
64     144    
-16    -16    
32     -48    
-144   -432   
48     -112   
-144   304    
64     -192   
-144   80     
144    64     
80     128    
-16    -16    
256    208    
-480   112    
160    -1616  
384    32     
-224   -560   
-208   128    
-256   -224   
656    -576   
-64    352    
304    -1328  
-272   144    
112    -1152  
-208   -288   
640    -96    
-16    208    
-272   -800   
176    -256   
-176   -1232  
64     240    
288    32     
-176   80     
-96    -64    
64     -192   
112    160    
144    -256   
16     -80    
688    160    
-1200  576    
736    -1216  
224    -256   
96     -160   
-112   448    
-80    -160   
432    512    
-96    512    
32     -416   
64     -32    
-32    -96    
-576   16     
48     -96    
128    576    
160    96     
-416   32     
-32    -560   
416    -704   
0      -336   
-128   160    
-192   256    
144    256    
176    -16    
368    -320   
-608   -192   
-176   144    
416    32     
112    -336   
-256   -208   
-912   -1872  
-672   -448   
768    -944   
-640   32     
-480   -1776  
912    624    
-688   560    
-592   416    
432    -224   
-160   -32    
-144   -128   
128    48     
-320   -160   
208    -288   
-640   -224   
-16    32     
-96    48     
-112   416    
448    496    
-176   -304   
-80    192    
272    1152   
1440   -128   
-688   -480   
80     -960   
-272   -304   
240    192    
-192   256    
160    -256   
-112   592    
-352   0      
-160   0      
464    -256   
144    -16    
-128   -704   
-416   160    
320    -16    
256    32     
-288   -64    
-128   -128   
32     -112   
48     -160   
-128   -160   
-960   336    
608    -80    
-128   576    
-416   -176   
80     384    
16     272    
-320   -432   
320    -160   
-128   -816   
544    448    
-80    304    
-336   -192   
368    48     
32     -48    
544    -240   
-192   80     
-48    -16    
-160   -208   
192    -16    
288    -224   
0      176    
64     -64    
-128   192    
-64    -16    
112    -96    
-704   80     
-112   -208   
1152   384    
-704   -176   
-352   64     
1952   -256   
-896   192    
-512   -16    
544    384    
336    -48    
-176   288    
-464   -304   
0      192    
-32    -80    
416    112    
144    -16    
-272   112    
416    -80    
-80    48     
176    -224   
-128   208    
480    -560   
-592   240    
896    0      
-720   96     
-1072  -192   
144    -208   
688    0      
-448   64     
-656   -80    
192    96     
-512   -112   
-288   -48    
80     -64    
-464   80     
592    192    
32     304    
-992   0      
144    192    
368    -48    
-160   32     
256    48     
-368   -48    
272    0      
32     -64    
-80    0      
-320   -192   
-64    -16    
-176   -96    
-240   112    
-64    32     
32     32     
0      -256   
192    0      
160    112    
544    -480   
-128   -432   
-288   -320   
352    -288   
192    32     
16     416    
-496   272    
256    240    
-224   -64    
-80    64     
-592   -96    
-96    208    
160    -176   
96     224    
-176   272    
432    96     
-64    -112   
-208   96     
96     64     
80     -16    
-320   144    
176    208    
-16    288    
32     -1232  
-288   -336   
-336   592    
0      -256   
144    -336   
-960   -1616  
1088   -976   
-608   0      
-640   -64    
1168   336    
-464   -32    
-80    128    
-256   -256   
304    -144   
80     0      
-496   352    
64     -224   
-368   112    
224    -192   
-592   48     
-64    336    
-48    -128   
112    480    
80     112    
-208   -128   
80     304    
-608   -368   
-64    544    
816    -64    
-832   288    
112    -128   
-16    112    
368    400    
-544   448    
-144   -272   
-80    -32    
0      -80    
320    16     
-240   208    
-48    0      
32     128    
-128   48     
-64    -16    
-32    -64    
80     -16    
-96    48     
-192   64     
192    -32    
-192   32     
-16    176    
224    112    
-480   80     
320    -16    
32     64     
432    128    
-1584  16     
656    608    
352    240    
-576   -32    
1296   288    
-976   48     
96     192    
112    400    
144    -96    
-64    128    
-224   112    
256    48     
80     32     
-96    -112   
304    -16    
-320   0      
16     -96    
352    -304   
-352   -144   
-48    112    
-16    32     
-128   -832   
-544   432    
752    -496   
-448   -688   
-48    128    
-128   304    
240    -80    
-240   32     
352    48     
48     64     
96     160    
0      96     
-240   16     
32     240    
176    80     
-160   144    
-48    112    
224    272    
-112   80     
-64    -48    
-16    80     
-64    -16    
304    128    
480    96     
-320   0      
64     -432   
528    -16    
-448   16     
-160   112    
784    192    
-144   144    
32     0      
32     128    
704    -80    
-592   48     
656    -96    
-608   144    
-192   128    
352    48     
80     32     
-288   0      
-160   0      
96     112    
160    208    
464    928    
-864   896    
-48    -80    
128    -192   
-128   -336   
-176   160    
-400   2240   
1024   -16    
-896   -896   
208    -544   
976    -160   
368    -352   
-512   96     
-272   1312   
16     -608   
272    320    
96     -272   
-256   -224   
96     560    
272    -368   
176    448    
-32    976    
-224   -304   
192    144    
128    -240   
0      160    
-192   416    
144    -16    
-32    -96    
128    -16    
-32    336    
80     352    
96     416    
176    240    
0      -32    
-64    576    
16     -256   
-176   368    
208    272    
48     128    
-352   -128   
64     -320   
112    544    
464    1504   
-80    112    
-144   176    
336    -32    
144    432    
-32    96     
-160   80     
16     384    
464    640    
176    400    
-400   -224   
-224   -480   
304    112    
-224   256    
944    224    
-272   784    
48     976    
64     1024   
240    -144   
-336   -992   
320    -1008  
320    1152   
-112   352    
-320   256    
-240   -208   
352    -512   
192    64     
112    -144   
-384   -16    
496    0      
-208   208    
112    128    
48     -176   
-288   -16    
112    32     
192    -80    
80     160    
-192   208    
96     736    
352    448    
-224   320    
-304   416    
240    176    
-160   -624   
720    -944   
-464   496    
336    -656   
256    -48    
368    128    
-592   -80    
336    -1168  
496    64     
-112   -576   
-256   352    
-144   320    
96     -48    
288    64     
176    112    
-224   144    
80     384    
256    224    
240    224    
-48    272    
352    368    
-640   1104   
528    -208   
192    48     
-64    320    
-256   96     
176    384    
192    -224   
0      -48    
-48    -16    
-80    160    
288    384    
48     -112   
-128   -656   
32     496    
0      -224   
208    240    
160    -720   
-224   -256   
-32    -128   
288    320    
0      -224   
0      144    
-192   -64    
368    384    
-160   176    
-128   192    
112    80     
0      -304   
-16    352    
-32    -1008  
-1456  -960   
688    -112   
-400   -112   
464    -144   
304    80     
-720   -576   
368    160    
-64    304    
304    80     
-192   240    
96     48     
208    176    
176    -80    
-672   64     
480    -32    
-80    160    
16     -544   
-32    -160   
-32    -192   
80     160    
512    -112   
-1664  832    
992    -64    
-480   -816   
-32    -224   
176    16     
-144   144    
-176   -112   
-16    352    
432    -208   
80     16     
-240   -160   
-48    176    
240    -128   
-112   160    
208    -112   
-320   -816   
-16    384    
-192   -80    
32     -48    
432    -80    
112    752    
-912   -160   
-288   -384   
752    192    
288    -400   
0      336    
-672   -160   
-368   272    
528    -1104  
-336   112    
0      -304   
-208   -112   
528    -448   
352    -304   
-400   -176   
-304   -384   
288    96     
144    -400   
80     -32    
288    64     
-416   80     
-112   -2496  
704    -112   
704    192    
-880   80     
-96    -400   
-128   160    
48     -144   
-512   1792   
2304   -1328  
-416   1792   
-1504  -144   
-944   -448   
400    256    
240    -752   
-304   -128   
-144   -1264  
16     304    
576    32     
-528   176    
272    -112   
-112   80     
384    128    
-32    64     
-336   -32    
416    -16    
-400   16     
-432   -1152  
-432   -432   
160    -272   
-48    96     
736    -656   
-208   -320   
-176   32     
400    64     
-544   -112   
944    128    
-448   32     
144    -32    
-304   64     
224    128    
-528   -96    
528    192    
-80    -96    
-208   32     
-240   -272   
-32    64     
80     208    
-48    -1152  
256    48     
-224   0      
-368   -272   
336    0      
288    -48    
-352   208    
304    -144   
-832   112    
512    -304   
-176   -96    
-144   -96    
-352   -640   
0      -448   
352    32     
-384   -864   
352    240    
-80    -128   
208    16     
48     -48    
-192   32     
-288   96     
112    -64    
64     -176   
-32    128    
-80    -112   
-288   0      
288    -208   
-144   -224   
352    -48    
128    -128   
-176   128    
16     160    
0      -80    
-288   16     
112    64     
-80    16     
160    -272   
-32    240    
16     656    
192    240    
752    448    
-1680  1680   
1552   -352   
32     -144   
80     -224   
-16    -16    
-496   192    
384    48     
-528   176    
400    -448   
-384   64     
48     208    
64     -112   
48     -160   
-288   -416   
192    64     
-192   272    
144    -192   
240    48     
-1440  -400   
-448   176    
448    1456   
608    -160   
-736   304    
160    176    
-144   -16    
80     160    
160    -368   
48     -336   
-304   -112   
-176   -112   
480    176    
-160   -176   
-224   208    
-48    32     
-592   96     
144    112    
-256   -64    
160    -112   
-896   0      
-112   224    
624    256    
-464   320    
-16    176    
-48    -224   
64     -176   
112    -80    
-64    16     
-64    144    
-304   -656   
1632   672    
-1776  1280   
-416   208    
496    -336   
-896   -464   
208    272    
-784   192    
-560   -176   
400    -240   
-176   32     
-240   -240   
0      80     
32     -16    
32     112    
48     -32    
-176   32     
32     -112   
-192   -240   
-432   -576   
32     -192   
16     -32    
-112   -800   
-1136  832    
1872   336    
-1456  336    
112    -208   
480    -256   
-864   704    
480    304    
-112   144    
192    -16    
-80    48     
-352   -144   
112    320    
176    -16    
160    320    
-48    32     
-128   176    
-848   816    
352    640    
64     288    
-64    128    
64     272    
304    1456   
-976   1392   
64     336    
560    64     
-352   352    
624    272    
-176   -80    
-80    -512   
-336   -16    
224    -144   
-128   -96    
-208   -288   
544    -608   
272    -48    
-224   16     
448    -768   
-272   32     
16     304    
-272   144    
160    256    
112    416    
128    224    
-208   -96    
608    16     
480    384    
-448   736    
160    336    
-736   64     
-384   -2256  
-1664  608    
-400   128    
464    128    
368    -464   
-336   -1648  
-512   48     
-240   1104   
176    -368   
384    192    
-16    464    
-384   -320   
-400   -112   
176    -96    
192    -432   
-352   -448   
-288   384    
-368   -192   
368    -576   
80     -352   
-240   672    
-256   448    
384    -272   
-240   64     
64     304    
-304   -624   
-80    256    
384    1088   
80     2512   
-112   -80    
-192   -32    
-32    192    
496    640    
-144   224    
-336   -688   
-32    -480   
80     208    
-352   -512   
304    48     
-240   -288   
32     160    
64     240    
32     -112   
96     -400   
-96    320    
176    640    
-256   -304   
224    64     
-528   -80    
112    112    
-48    -528   
608    -368   
-576   -480   
-176   -416   
16     176    
192    176    
-64    -208   
208    -928   
-272   1488   
240    832    
-192   -304   
0      16     
160    64     
32     16     
160    768    
-368   384    
80     208    
192    -208   
48     96     
0      368    
-208   -80    
112    -336   
32     -240   
16     96     
0      32     
-160   -752   
-240   -1264  
400    -224   
80     336    
-192   240    
848    1008   
-1520  1456   
144    -272   
480    -448   
-112   16     
-368   672    
800    32     
-336   160    
-160   800    
-64    -48    
-16    352    
112    -32    
96     -80    
-96    400    
-336   288    
256    112    
160    -144   
-240   -32    
-80    80     
64     112    
528    576    
-624   1056   
592    -160   
-400   480    
64     -112   
-64    80     
160    672    
-16    256    
-96    160    
176    112    
-128   112    
-80    32     
112    0      
32     -32    
-288   352    
480    480    
-192   720    
-192   -128   
0      -32    
240    32     
-256   240    
-80    48     
320    112    
-64    80     
160    -16    
-320   48     
288    -128   
-80    256    
176    112    
-64    -176   
-1600  -1824  
-320   -400   
2304   -32    
-1568  -192   
240    400    
912    320    
-832   -128   
0      240    
384    48     
-128   80     
32     128    
16     96     
-144   16     
176    -64    
-336   -32    
336    -16    
-304   -400   
464    0      
-48    -1136  
128    16     
128    144    
128    368    
-1408  864    
864    16     
-496   128    
336    -96    
-128   0      
-224   96     
224    272    
-80    96     
208    128    
208    -256   
-208   176    
48     -64    
96     128    
-176   -800   
240    64     
-64    64     
304    -160   
-336   592    
32     416    
32     -64    
32     304    
1232   0      
-160   96     
-1184  256    
-96    -208   
576    -224   
-112   -736   
-336   304    
-112   -160   
256    144    
352    -496   
-560   176    
-160   256    
480    560    
400    160    
-256   240    
-608   224    
0      -128   
576    -304   
48     -336   
48     -352   
-128   -256   
544    352    
480    -704   
-1248  400    
-96    112    
880    176    
-368   -864   
2224   1776   
-2544  384    
816    -240   
1088   -336   
-784   -80    
-624   -256   
0      96     
1312   -304   
-96    -512   
-704   -160   
368    -96    
-16    96     
-80    144    
288    -64    
-144   80     
-192   16     
-32    320    
272    64     
-560   64     
544    400    
640    144    
-1040  80     
592    -192   
-784   -192   
720    176    
-112   -336   
-208   160    
112    -304   
96     16     
16     -160   
208    32     
0      -32    
-48    288    
160    384    
-80    192    
-224   -48    
256    -208   
192    -160   
-304   -448   
352    48     
0      -240   
96     176    
-80    -176   
192    368    
-16    416    
-96    -48    
96     -192   
-192   -304   
-64    -1360  
-528   -736   
288    -1120  
96     -336   
464    -176   
-144   -160   
128    64     
320    144    
-208   -112   
96     -256   
0      -464   
48     272    
480    -400   
-288   224    
-144   32     
-176   -432   
16     64     
272    -1152  
240    -304   
-240   -384   
320    192    
-240   384    
32     368    
80     240    
16     -368   
-112   -496   
-192   -80    
160    144    
192    320    
-352   224    
-112   -32    
80     -64    
112    -176   
0      -2336  
-416   752    
1408   336    
-1424  -640   
880    -1184  
64     -1184  
-880   336    
112    336    
368    448    
240    48     
-304   336    
-144   368    
32     -64    
-64    -240   
-144   16     
-64    176    
0      -16    
144    -288   
176    -832   
-112   80     
-96    -608   
464    -448   
304    736    
304    464    
-512   144    
480    -320   
-208   400    
144    -128   
-320   -192   
176    176    
128    -96    
0      -336   
224    -256   
-112   -720   
64     -64    
-96    464    
208    144    
-144   -144   
-64    608    
-144   -672   
208    -128   
-64    -192   
208    -144   
-48    208    
-32    -64    
-96    48     
-48    -656   
-96    -208   
-96    192    
-112   -32    
1376   -1152  
-1504  768    
-1056  -1024  
2176   -768   
-1104  -848   
-624   224    
832    144    
96     1152   
-864   -448   
480    -928   
-384   112    
-192   176    
208    80     
176    -256   
-448   64     
80     -768   
160    -80    
-64    0      
128    -64    
64     48     
-32    16     
-768   -128   
1904   -480   
-672   -912   
-1168  -640   
1072   672    
144    768    
-416   928    
160    592    
224    352    
-112   -752   
368    -112   
80     -160   
64     -112   
-48    112    
320    32     
-288   -176   
-400   -272   
400    368    
32     1280   
-288   720    
464    112    
32     384    
-272   -464   
464    912    
16     -1056  
-736   -1200  
576    784    
368    16     
-496   -176   
416    560    
-368   624    
688    -192   
-656   -48    
336    -112   
-528   -352   
-304   -144   
896    -144   
-560   176    
560    832    
-672   384    
-368   16     
352    288    
-1424  160    
80     288    
-64    48     
80     32     
512    480    
-272   720    
0      64     
128    -64    
-1200  -1808  
-480   272    
736    -112   
-1184  160    
464    -368   
-80    -816   
-784   -400   
-784   144    
80     -416   
160    48     
-192   -320   
-1312  48     
224    208    
432    -32    
-208   400    
96     -112   
64     -32    
-96    -432   
192    64     
-64    752    
-80    64     
-48    0      
512    256    
-848   400    
256    32     
384    304    
-448   544    
336    1728   
-128   976    
592    432    
-256   -560   
-144   -144   
-208   -768   
32     304    
-32    304    
96     272    
-176   -576   
-656   -320   
240    32     
-144   -176   
-288   736    
160    1024   
-144   80     
-64    -672   
-144   -240   
144    416    
-576   -592   
32     80     
304    576    
-192   -256   
-208   -1024  
352    -688   
-800   -16    
288    -976   
736    -240   
288    80     
-464   576    
256    208    
-272   -416   
-320   -704   
-272   128    
48     80     
48     -560   
-256   48     
144    432    
-112   624    
192    192    
64     112    
-32    176    
-176   464    
192    400    
-144   144    
0      128    
112    176    
32     112    
-32    128    
160    1072   
304    576    
-128   -16    
-176   192    
-208   -320   
416    -2224  
-480   592    
544    128    
-544   -336   
176    896    
-352   880    
608    848    
-736   368    
-48    48     
-1280  -368   
48     -1456  
160    -64    
128    80     
-384   464    
0      -128   
48     -176   
96     80     
-160   224    
96     16     
-432   -224   
512    -512   
-512   464    
320    -272   
144    48     
-1040  -240   
256    32     
-96    272    
464    288    
-560   32     
-144   48     
496    -80    
-80    208    
-48    96     
-96    144    
64     96     
208    16     
96     96     
-432   -32    
272    112    
-320   0      
400    96     
-112   112    
64     128    
-32    -96    
-192   48     
144    -48    
128    160    
80     80     
-368   -112   
1344   -256   
-2544  -32    
1152   32     
144    -144   
-784   -176   
-32    -96    
528    -400   
-288   -272   
-96    -224   
192    96     
224    96     
-112   48     
-48    16     
128    208    
-352   -48    
64     304    
-32    -192   
-224   96     
112    -160   
-16    96     
96     32     
176    144    
512    -288   
-1568  32     
832    -1056  
528    16     
-176   784    
-256   272    
176    -32    
96     -304   
160    160    
-288   0      
-160   176    
32     -48    
96     -16    
304    128    
-176   64     
-112   96     
-288   256    
144    16     
384    -192   
-448   96     
-144   -640   
-240   240    
224    80     
-304   192    
800    -96    
-368   768    
-416   368    
48     -288   
-16    416    
720    176    
-768   240    
-304   32     
192    -48    
432    -288   
-240   -304   
-528   -112   
48     224    
384    240    
496    -64    
-432   -16    
320    -112   
-240   224    
48     208    
176    144    
0      0      
224    96     
32     16     
-128   32     
-1072  -2336  
1552   -1568  
432    560    
-1360  752    
944    336    
-656   -336   
-112   -32    
1056   480    
-544   64     
96     288    
-96    48     
16     96     
96     32     
-16    48     
208    32     
-192   16     
64     128    
-128   144    
-192   80     
-144   -448   
-176   -528   
112    0      
-192   -320   
608    -16    
240    -1616  
-400   160    
-96    144    
160    176    
-16    -64    
16     -128   
-352   -128   
160    128    
16     384    
-160   240    
112    80     
464    -128   
-256   -192   
-192   -176   
144    368    
304    -160   
-80    160    
-160   240    
160    288    
-64    192    
160    208    
176    32     
-96    -16    
48     -256   
-64    -144   
64     -128   
-16    176    
-80    400    
304    720    
448    48     
-336   -544   
160    -1008  
-784   -2064  
416    -768   
80     48     
-112   80     
176    352    
-80    464    
-256   -592   
288    -496   
-272   -256   
-240   -336   
128    -208   
48     -672   
-160   -448   
-48    -272   
64     160    
16     -704   
-96    -32    
-80    -512   
224    48     
-16    80     
64     208    
-176   688    
64     448    
-48    -368   
80     -80    
-384   -784   
736    -1296  
-352   720    
544    -848   
-528   -240   
192    528    
192    -336   
256    -352   
-16    48     
-160   64     
0      336    
-16    -528   
208    0      
-48    112    
-80    192    
16     48     
64     -96    
64     -368   
0      16     
128    160    
-240   16     
-32    896    
608    -64    
-624   384    
-32    288    
-48    160    
-176   -400   
544    -1088  
160    128    
-240   704    
-48    -128   
160    -416   
272    -32    
208    80     
-224   16     
-64    -48    
176    112    
176    -1152  
0      192    
-224   80     
272    128    
144    -192   
48     -304   
-160   -96    
-16    112    
240    336    
16     -80    
16     -64    
48     -288   
160    224    
-608   -896   
2192   -896   
-224   1136   
-448   -112   
1216   -512   
-224   64     
48     -64    
512    272    
-816   -3072  
-80    -416   
208    -752   
16     464    
-32    -48    
128    -256   
-96    112    
128    48     
-32    -896   
160    192    
-256   304    
-128   -400   
288    -272   
-112   -1296  
-1184  992    
1280   -912   
-880   -320   
896    -384   
-512   336    
560    48     
-96    1856   
304    1104   
16     -832   
-224   -416   
272    -288   
-144   -768   
-320   -864   
720    -64    
-672   -48    
-128   -144   
128    -1200  
-96    -1248  
0      -688   
-160   16     
128    0      
-80    528    
-320   -1200  
256    -288   
656    640    
-608   992    
-112   544    
720    208    
-512   464    
-192   -16    
80     288    
64     -320   
128    112    
-352   208    
128    416    
112    -416   
336    144    
-512   -640   
-336   176    
96     -96    
-224   144    
64     -656   
-384   -80    
320    144    
-256   -384   
-16    0      
-144   -544   
-256   -304   
144    -32    
-992   2464   
496    -240   
-448   -368   
-288   -1440  
848    1584   
384    464    
-432   1056   
224    256    
80     240    
288    -1024  
-224   640    
-48    128    
-32    -208   
-48    -512   
144    -352   
-128   240    
-32    128    
-96    288    
528    320    
-144   656    
-144   -336   
144    80     
336    -432   
-864   -1408  
32     -208   
-64    -384   
-384   336    
368    -224   
-176   272    
208    -128   
-352   624    
384    -80    
-208   112    
-80    -304   
80     0      
208    -1104  
-128   -176   
-80    192    
96     224    
-208   160    
128    320    
-432   -48    
-416   -768   
-128   -480   
80     -96    
192    144    
-272   544    
368    416    
96     224    
-208   112    
128    -384   
528    1040   
-928   960    
-48    256    
448    0      
48     -912   
-768   -560   
-32    112    
400    144    
288    192    
-240   368    
224    256    
-112   176    
-192   -176   
320    48     
16     -320   
-464   176    
400    -240   
-16    -176   
-32    304    
-176   144    
160    -144   
-320   0      
160    96     
240    -128   
-272   80     
96     -304   
-48    -16    
-208   16     
80     96     
976    2688   
-2368  -1136  
-928   272    
1024   -560   
-1040  -160   
-48    -160   
-320   304    
448    -272   
272    16     
-128   48     
-128   -176   
-816   176    
400    32     
-544   -144   
-48    -208   
-144   352    
80     -240   
-32    384    
240    -80    
-288   160    
-496   -64    
736    480    
-688   64     
-480   -416   
464    -16    
-208   -64    
48     496    
352    48     
48     16     
-512   48     
-336   -16    
448    96     
192    48     
-368   144    
240    112    
-640   128    
304    32     
-960   192    
512    -192   
-720   144    
416    64     
-272   -16    
288    32     
-64    -160   
-336   -176   
384    160    
-128   -144   
-16    160    
16     64     
-208   288    
-944   288    
1488   704    
-1200  -112   
-256   -112   
-592   -96    
-608   96     
1120   -32    
-736   80     
0      208    
96     48     
32     48     
272    -80    
-240   112    
96     -80    
-400   32     
368    48     
-240   64     
64     -32    
-128   176    
-304   -160   
-16    112    
-160   -656   
-480   960    
512    64     
-1072  -288   
1280   240    
-400   64     
-576   176    
288    64     
448    -32    
-240   48     
-176   48     
48     -16    
96     128    
-640   -32    
-160   128    
16     0      
224    352    
-128   16     
80     48     
-32    16     
-64    96     
-240   192    
992    -176   
-960   32     
192    -96    
176    208    
112    528    
-672   32     
-576   -48    
704    -224   
-1328  -112   
-352   160    
48     48     
400    432    
-400   432    
-208   -128   
-192   16     
16     464    
656    -224   
-640   64     
-256   96     
208    32     
160    96     
-96    0      
144    368    
-880   336    
448    16     
192    160    
-512   -64    
2608   3696   
-1760  2368   
928    -128   
1232   -528   
-912   -16    
-112   -48    
128    176    
736    240    
128    144    
-848   -176   
448    176    
-64    32     
288    144    
240    80     
-352   32     
-64    240    
384    -48    
-160   128    
-256   16     
-144   1168   
880    1536   
-320   1344   
32     32     
16     32     
-608   -208   
656    768    
320    48     
-640   -80    
128    -64    
432    32     
64     -112   
-704   -240   
272    0      
768    -32    
-816   -64    
80     -288   
128    -400   
0      -432   
240    -48    
-16    -32    
-272   -48    
96     -160   
320    -320   
-208   -208   
208    -160   
128    -496   
-192   -496   
-80    -96    
-368   -192   
224    -192   
304    -448   
-192   -304   
0      -192   
-768   960    
560    176    
16     208    
-352   304    
-64    320    
224    880    
64     -256   
-112   -528   
-48    576    
64     320    
-192   400    
160    304    
-32    -96    
-96    -16    
-80    272    
-160   224    
224    288    
112    32     
-176   80     
32     144    
-128   128    
240    -160   
-240   -144   
-64    -32    
0      -368   
-240   -448   
-144   -64    
288    48     
-176   -304   
512    -752   
-176   624    
0      16     
160    64     
0      224    
-128   288    
208    224    
-144   80     
32     0      
-32    -80    
0      208    
208    112    
64     128    
-128   32     
192    208    
-80    -64    
256    -1168  
-80    0      
-160   288    
-48    272    
480    -176   
-64    224    
544    -352   
-368   112    
-112   320    
-32    -192   
528    720    
496    448    
-864   144    
-32    -32    
560    -16    
-48    -288   
32     48     
-64    -2000  
-96    64     
16     112    
224    -64    
64     176    
16     96     
48     320    
128    208    
32     -80    
-80    192    
-32    -336   
-160   -80    
272    -144   
-128   224    
448    448    
-336   -256   
1584   1456   
-1392  832    
-1728  -592   
2464   -144   
-896   736    
-416   608    
320    208    
-128   1328   
528    1088   
-144   -1216  
-80    -224   
-96    128    
128    -304   
176    -112   
-112   32     
-96    192    
-16    -592   
96     64     
0      -208   
-48    64     
16     0      
-304   800    
2048   -272   
-1248  448    
144    128    
576    -1168  
48     -1648  
-592   -1440  
368    592    
224    -1056  
-416   -656   
464    -2656  
-112   96     
-224   -432   
-80    192    
224    208    
-288   336    
496    752    
-416   688    
-128   288    
288    -192   
-16    80     
160    -48    
-112   416    
688    1072   
-432   704    
-608   -432   
416    -1360  
-480   32     
-32    96     
528    -208   
160    208    
128    288    
-528   288    
-16    112    
96     -272   
-512   -1184  
0      -736   
-160   -112   
-528   64     
560    -48    
-240   -208   
-64    -48    
224    208    
208    224    
64     16     
-400   320    
-112   -16    
-112   224    
288    1200   
-208   -2192  
736    -1952  
688    80     
-128   352    
-800   256    
0      -656   
624    -448   
240    288    
-736   -624   
-96    -16    
544    -672   
-64    288    
64     48     
-368   144    
-160   -400   
864    64     
-272   -32    
-112   -32    
-288   -592   
480    -1152  
32     -1408  
-160   -592   
-32    304    
-144   32     
16     -560   
384    64     
-160   48     
608    368    
-576   -368   
-144   -1920  
208    -336   
-208   -1728  
176    -352   
-288   -160   
-64    -160   
112    192    
0      -160   
128    -896   
-224   -64    
64     -80    
208    -16    
144    -560   
-256   -400   
-1216  176    
144    48     
-192   -32    
0      -160   
-32    -272   
96     -1568  
224    304    
-304   208    
48     80     
400    128    
-800   368    
-64    -640   
240    96     
-288   224    
48     -144   
-112   112    
304    320    
336    112    
-240   -336   
-192   32     
240    -672   
176    16     
64     -400   
-208   32     
64     -400   
-96    224    
128    160    
144    -80    
-336   -16    
80     -16    
-160   0      
144    -112   
-256   -240   
-64    64     
48     -48    
224    -192   
80     -32    
-144   -1952  
1312   2224   
-2608  192    
448    -48    
1328   -176   
-1648  480    
592    -144   
-352   112    
352    -256   
-128   320    
-16    -208   
-144   320    
-96    -64    
336    -192   
128    240    
-752   -304   
480    -80    
240    -304   
-160   288    
160    -192   
32     80     
-304   -336   
864    496    
-256   80     
-576   -432   
688    -160   
-304   -16    
-400   0      
464    -80    
160    112    
-160   -336   
-144   160    
576    0      
-176   192    
-16    32     
224    -112   
-448   48     
224    272    
208    -32    
80     -48    
-400   -336   
-96    -256   
-368   -80    
-96    -128   
384    112    
-336   -448   
224    208    
64     -448   
-112   240    
304    -48    
-208   -48    
-1440  -2720  
736    -288   
272    -544   
-1264  160    
416    32     
448    192    
144    208    
-800   368    
560    288    
96     -320   
80     0      
-176   -672   
-80    176    
16     160    
-64    64     
96     208    
-256   -176   
112    64     
-96    128    
-16    176    
0      32     
576    896    
-272   -464   
-1024  32     
912    -544   
-352   16     
64     -80    
208    -32    
-352   160    
1008   -320   
-480   64     
-208   -96    
-16    16     
64     32     
16     -80    
0      96     
-128   -16    
16     48     
0      704    
-912   -80    
224    -96    
96     96     
-496   -16    
384    208    
-512   -80    
-576   128    
496    -176   
608    288    
-208   0      
-304   -144   
-1072  80     
-160   80     
-864   -240   
240    208    
16     112    
-448   112    
-64    -128   
320    -176   
-96    -288   
-688   96     
736    64     
-192   112    
-320   96     
-1152  -64    
48     192    
144    -304   
96     -336   
80     -16    
64     176    
256    112    
-832   976    
912    2672   
1040   144    
-2304  -464   
80     -240   
1264   -48    
-320   -16    
-384   -80    
-176   448    
-336   80     
448    192    
160    -96    
-384   -32    
-80    32     
-16    -32    
256    -48    
-304   240    
-80    144    
192    32     
-240   128    
-64    544    
48     640    
-64    80     
224    -224   
-240   -416   
-112   272    
-368   384    
-48    -336   
-16    -544   
-208   0      
192    832    
-432   192    
-80    -1024  
112    -48    
80     608    
0      256    
-304   -96    
480    -752   
-912   -608   
192    608    
-848   208    
32     96     
-208   -128   
-48    368    
384    608    
-640   -48    
160    -832   
16     -272   
-272   784    
272    640    
-160   -32    
160    -144   
-176   1024   
704    -320   
-448   720    
64     1072   
320    576    
-304   32     
400    112    
-128   128    
-16    32     
112    -288   
-96    32     
80     176    
112    0      
64     352    
16     448    
-336   368    
400    -352   
-96    80     
0      32     
-48    96     
-224   -48    
128    -32    
192    240    
-240   144    
48     112    
-48    32     
240    192    
16     80     
112    -16    
-192   -16    
-336   112    
640    -336   
-736   192    
128    -304   
-80    608    
-64    -224   
176    -672   
256    -16    
-160   304    
160    -16    
208    0      
-176   -16    
-128   112    
-288   384    
464    -400   
-240   -128   
0      208    
32     336    
-208   -144   
96     80     
336    496    
112    -16    
-544   64     
160    64     
-16    -112   
96     -48    
-96    -544   
-80    400    
-16    176    
-256   96     
272    208    
128    -128   
-64    0      
-16    32     
-32    352    
16     -192   
-256   112    
-64    -80    
64     48     
-48    -96    
0      112    
-192   512    
96     64     
32     304    
96     -304   
-400   496    
-96    320    
-64    352    
544    -160   
64     224    
832    -464   
-1328  32     
1264   0      
-368   -688   
-752   -320   
48     48     
128    -592   
80     480    
368    1728   
-384   80     
64     -320   
432    -448   
-144   528    
-176   288    
128    112    
64     -176   
160    464    
48     672    
0      576    
64     80     
-304   -944   
32     48     
704    -672   
-1232  -656   
688    64     
208    1280   
608    1296   
-384   336    
320    112    
160    80     
-224   144    
16     16     
176    304    
336    256    
-400   64     
304    48     
-144   -272   
320    -160   
64     -16    
16     80     
-80    80     
-336   0      
-64    -1824  
368    176    
688    576    
-64    320    
160    -208   
32     272    
-224   -416   
704    0      
-64    160    
48     16     
-64    192    
-80    128    
448    176    
-528   256    
480    528    
112    -80    
-48    -192   
384    144    
240    128    
-624   192    
224    608    
-160   -16    
176    368    
-176   64     
-480   128    
272    0      
736    1024   
-1952  -976   
1280   -2656  
1328   464    
0      368    
-864   368    
-240   -240   
576    -512   
192    208    
-320   -16    
-336   256    
0      240    
368    32     
144    -64    
-112   48     
-400   -48    
352    240    
384    0      
-144   112    
16     -320   
-480   288    
704    -496   
-720   224    
272    -144   
16     80     
-48    192    
-192   -320   
-336   -32    
352    -80    
-48    -112   
160    32     
-160   32     
160    80     
-112   336    
-16    -80    
-128   128    
-160   -368   
368    288    
-336   528    
64     656    
112    224    
128    -32    
-432   -144   
496    192    
-64    0      
416    144    
80     16     
-288   112    
-144   288    
64     80     
576    336    
-656   -16    
112    96     
80     -624   
656    128    
-576   -1056  
-592   -224   
848    -128   
-432   -48    
528    -64    
-256   448    
160    32     
16     -32    
0      160    
128    64     
48     528    
304    -496   
-272   -80    
-64    -1040  
128    384    
304    -128   
0      64     
-240   -16    
48     144    
160    80     
-48    -32    
80     -16    
176    176    
-96    128    
224    -400   
-64    208    
80     -704   
-112   -2208  
-1104  1392   
1328   208    
-864   240    
704    160    
-400   -368   
-32    64     
-272   208    
496    -480   
192    128    
-160   96     
-16    32     
-112   -48    
336    208    
-384   16     
368    272    
-48    240    
16     -64    
160    192    
64     80     
-32    80     
-256   -736   
-336   528    
1120   -192   
-320   -1264  
-464   -32    
304    48     
80     -400   
352    -160   
-160   0      
-320   272    
96     -288   
400    -32    
-64    -16    
-160   -64    
256    96     
-176   -480   
352    -240   
-16    -160   
-224   -592   
448    -128   
-160   32     
96     -48    
80     32     
-64    -192   
304    176    
-80    -320   
-96    -496   
208    128    
-320   -320   
-272   -1344  
1312   240    
-160   -352   
-1296  -96    
688    -192   
-112   -96    
-304   208    
512    -256   
-144   -1888  
-288   -176   
352    144    
160    32     
128    176    
-256   -176   
192    -32    
144    -80    
-368   16     
176    -144   
-224   -176   
208    -192   
0      -32    
-160   -1088  
-240   320    
784    -496   
-1008  -576   
112    464    
240    -48    
-128   -464   
-512   256    
-192   16     
368    -48    
48     96     
48     -112   
-288   128    
-32    64     
48     -176   
80     -32    
80     304    
480    -560   
-192   176    
-64    -592   
304    -48    
688    -624   
-992   720    
352    -272   
304    -112   
-608   240    
16     -352   
160    -96    
224    -192   
-432   32     
-80    16     
208    0      
48     -144   
-256   96     
352    -832   
768    224    
-784   144    
320    400    
-256   -384   
-240   96     
144    -16    
-192   -128   
144    80     
96     -144   
128    496    
-592   112    
-272   -208   
720    0      
-160   -144   
-496   -864   
944    -1344  
624    -304   
1104   336    
-480   0      
-592   0      
1216   864    
-640   1088   
-416   -912   
96     -560   
-256   -64    
64     -144   
-288   -192   
240    464    
160    -400   
96     -368   
-304   -64    
-64    -112   
-176   -32    
288    -624   
0      320    
-176   656    
256    -160   
-640   592    
192    880    
0      -128   
-224   -1360  
240    -1008  
128    32     
-144   48     
240    -128   
-144   192    
160    -736   
112    -832   
-368   -80    
-16    -160   
0      -384   
16     -1280  
-528   -992   
288    368    
-224   -384   
208    -48    
288    -48    
-368   -848   
144    -528   
160    320    
224    160    
-32    -432   
-208   -32    
-16    256    
-112   -384   
192    496    
176    -752   
-672   400    
368    256    
-288   -128   
-240   -400   
-48    -496   
160    752    
-128   352    
-224   64     
96     -224   
-80    32     
-464   16     
112    -112   
-672   -16    
32     112    
144    400    
-288   0      
-192   -64    
176    16     
-80    32     
320    144    
-304   -112   
208    160    
48     32     
192    96     
64     176    
-336   368    
32     -32    
176    -16    
-384   -336   
432    -784   
-336   544    
-208   -384   
-528   64     
-352   -32    
448    -432   
176    -144   
64     80     
-48    -48    
-144   112    
288    -80    
-32    80     
96     192    
-96    32     
208    208    
-128   432    
16     368    
-144   192    
-128   -112   
640    112    
-912   864    
416    -384   
336    -240   
48     -480   
-208   176    
-416   -288   
400    -960   
320    -32    
64     -208   
-144   -208   
-352   0      
0      -80    
-272   96     
32     320    
-192   48     
-352   -336   
144    -464   
256    992    
336    -192   
-784   -912   
-96    528    
144    368    
48     -240   
-112   224    
-176   128    
192    -288   
0      160    
288    48     
-384   128    
-416   -912   
-2192  0      
1328   160    
368    944    
-1200  880    
688    704    
-16    -160   
-752   960    
64     992    
384    112    
-144   0      
-16    -16    
-96    48     
-160   32     
224    368    
-208   64     
-64    64     
-64    400    
96     272    
16     64     
-192   80     
-384   592    
1968   -256   
-1024  -96    
48     288    
320    256    
-528   -528   
-16    16     
16     48     
-208   -112   
-16    64     
272    48     
272    32     
-160   128    
-592   80     
272    32     
256    112    
-128   112    
-512   176    
112    16     
80     -112   
-32    -464   
704    208    
-336   272    
128    -192   
-16    112    
48     336    
-176   240    
272    432    
656    128    
-544   -48    
-64    16     
48     144    
-96    64     
272    -48    
288    224    
-128   -32    
128    128    
-624   -16    
368    -512   
64     -112   
0      -128   
-240   144    
32     48     
192    64     
608    976    
-1184  16     
-272   176    
1120   32     
-368   448    
352    -1968  
480    -2624  
704    848    
528    224    
-1072  512    
-592   96     
720    160    
560    272    
-160   -96    
-560   272    
0      128    
192    144    
368    -48    
48     176    
-80    -96    
-80    272    
208    -112   
-96    128    
-176   -96    
-448   -336   
-48    80     
160    16     
-288   240    
848    -112   
-16    272    
-656   -128   
-128   336    
848    -112   
-1104  48     
624    -64    
-480   256    
208    64     
-112   208    
128    -32    
-192   -96    
-128   48     
176    48     
256    176    
-176   48     
-288   0      
128    160    
-112   128    
288    192    
-112   368    
64     272    
-160   208    
-112   -32    
304    -80    
-176   -96    
-112   96     
320    128    
-64    32     
-256   0      
544    48     
-320   -80    
80     -288   
336    160    
-224   -96    
-64    -208   
-96    32     
112    -112   
-192   112    
96     272    
-128   -160   
-48    -704   
208    -144   
-128   864    
-288   368    
208    128    
544    880    
224    128    
-464   -64    
-32    128    
64     256    
304    -96    
-32    64     
-176   -96    
-336   384    
288    -80    
208    -624   
-208   96     
1152   1664   
-2320  816    
816    -112   
560    -336   
-96    -80    
-112   240    
-272   48     
672    224    
-176   208    
176    -176   
-256   16     
-128   192    
304    32     
-16    -128   
-144   -864   
32     -64    
80     208    
-176   -288   
272    -304   
-64    176    
-32    352    
672    1040   
-48    64     
-672   -656   
400    48     
-144   -112   
32     -128   
192    96     
192    80     
-496   144    
0      -1664  
256    -128   
336    -112   
-224   112    
-144   224    
208    208    
96     -128   
-304   128    
240    -48    
-176   256    
208    -48    
160    -16    
48     -16    
-112   -16    
160    80     
-144   -256   
16     144    
288    -1008  
0      48     
-192   -176   
1568   1296   
-1072  512    
-160   -160   
640    -96    
-320   288    
-272   128    
752    64     
-240   416    
-176   16     
-80    128    
128    -608   
64     -160   
304    -3040  
-352   -160   
80     160    
112    336    
-16    64     
-208   64     
-176   -32    
336    0      
16     96     
112    608    
-176   -624   
-1264  -144   
2048   -128   
-448   -32    
-416   48     
560    -752   
-560   208    
672    480    
-448   192    
-80    -32    
96     112    
32     96     
-128   -128   
0      176    
288    -544   
-160   32     
432    -288   
-96    224    
-144   -672   
-224   0      
208    288    
-464   816    
432    -480   
-224   272    
480    -288   
32     -864   
-576   288    
608    224    
-64    -64    
-240   112    
176    336    
-192   32     
-64    -144   
-560   -256   
528    240    
-368   -832   
224    128    
-16    832    
-736   448    
96     -32    
144    -224   
48     -416   
0      -112   
176    624    
-208   144    
-160   528    
288    16     
-432   480    
272    176    
1536   2032   
-2224  -352   
-112   -784   
1936   -960   
-960   -1792  
-944   -864   
16     304    
720    704    
-16    464    
-80    192    
-400   -768   
272    -1744  
368    -160   
192    64     
-160   128    
-112   512    
-112   -160   
112    -496   
272    -352   
-64    -544   
-304   -288   
-528   -144   
144    160    
-944   -160   
-352   -464   
304    -432   
288    784    
-112   1216   
240    -2336  
32     272    
-16    512    
-48    -304   
80     96     
48     -48    
128    -16    
16     -256   
-128   -64    
48     1040   
-256   -16    
256    -48    
32     -336   
-320   448    
176    176    
-16    192    
608    144    
-160   -336   
-288   160    
176    -512   
-16    960    
400    -80    
-208   0      
-512   496    
1248   -560   
-336   16     
160    896    
64     416    
240    -160   
0      1424   
-416   -512   
480    -416   
304    -144   
-240   -16    
112    16     
-96    256    
48     128    
352    368    
112    16     
0      -1120  
-128   -336   
208    720    
-688   -368   
16     -80    
176    48     
-208   160    
-176   -336   
-112   -2064  
-176   -624   
640    -1280  
720    -256   
-640   464    
48     48     
-144   960    
352    -128   
-176   -800   
-272   -672   
64     -480   
144    624    
-816   480    
400    -208   
0      -432   
-400   -720   
288    96     
224    -480   
32     -144   
-48    -240   
-96    -144   
16     -112   
352    -416   
32     -16    
-240   80     
-368   -32    
560    64     
-32    -304   
-592   -192   
208    -816   
448    -576   
-224   96     
304    -688   
-272   176    
80     464    
48     -448   
160    64     
-128   -544   
-128   224    
256    -16    
-336   176    
48     -80    
-208   288    
112    96     
-32    16     
336    -400   
-208   208    
-112   -240   
368    -48    
-416   256    
480    16     
-464   192    
496    -32    
-256   16     
224    -576   
-1168  -496   
1824   -800   
-1536  304    
656    -256   
-144   96     
-64    112    
0      496    
32     -160   
-560   -240   
-16    -224   
-64    96     
224    144    
112    -48    
-80    -48    
-480   -32    
368    112    
-48    48     
-48    -160   
-544   -256   
32     16     
-448   -80    
512    784    
-1424  -176   
320    224    
160    -96    
-1200  -144   
368    32     
-304   96     
32     240    
80     -288   
-160   -144   
-32    -16    
-128   80     
-400   -224   
272    64     
-432   -32    
768    -80    
-368   304    
272    512    
384    128    
-192   32     
16     144    
-464   144    
32     -224   
-848   -16    
336    -208   
-272   -64    
-112   -64    
448    -64    
176    -112   
32     -48    
-192   160    
-320   240    
-96    -96    
512    0      
-256   0      
-464   592    
-192   320    
-16    112    
160    -112   
112    -48    
-432   -176   
96     80     
352    48     
32     -16    
400    416    
-656   -128   
-416   208    
832    32     
-352   -416   
400    1104   
1616   -928   
-496   1216   
112    -16    
-832   -240   
0      576    
1056   0      
-160   384    
-64    -416   
-320   64     
192    32     
80     448    
-192   -208   
-112   224    
80     -64    
-48    96     
-208   32     
-32    112    
112    96     
-496   -192   
672    320    
-976   -80    
112    128    
528    -320   
-272   -112   
-64    80     
560    48     
-496   48     
416    -224   
-224   48     
528    -160   
-464   48     
320    192    
-352   256    
-96    112    
384    80     
-768   -208   
384    32     
-272   -160   
-496   64     
384    0      
-16    96     
0      48     
-96    224    
-96    160    
-160   192    
240    16     
-176   48     
96     368    
192    64     
-336   144    
16     16     
48     528    
848    -32    
-432   368    
416    112    
-112   256    
64     208    
-544   352    
176    272    
-80    256    
224    240    
-112   32     
-176   -32    
48     -192   
-96    160    
256    256    
-144   16     
224    720    
-432   560    
176    0      
64     -160   
48     384    
-240   304    
160    176    
160    128    
-64    544    
192    -176   
-320   -352   
-16    0      
208    160    
-1264  -2224  
176    -224   
-224   96     
-304   608    
848    288    
-432   -288   
-224   -352   
-352   480    
416    480    
-112   -32    
-144   -224   
-240   160    
32     208    
176    176    
-448   864    
192    -304   
-336   -48    
176    -112   
224    -16    
-80    464    
-336   -640   
208    -624   
-576   128    
1280   -128   
-928   -512   
256    -512   
-192   256    
80     0      
256    -128   
0      128    
-240   192    
-368   -64    
672    16     
-192   16     
-80    -16    
-80    32     
240    -32    
128    0      
-240   352    
-240   256    
272    192    
0      48     
-128   112    
-176   80     
80     48     
32     320    
112    128    
-80    32     
16     160    
112    704    
-448   -720   
-288   -128   
240    512    
-448   -144   
528    0      
432    80     
-560   144    
-128   -160   
-80    240    
272    16     
-96    608    
32     176    
224    -64    
-160   -256   
-160   176    
304    256    
-208   128    
144    752    
368    336    
-112   288    
16     -32    
-656   -416   
1888   -304   
-528   -1024  
-1392  -240   
1216   432    
208    -32    
-80    -576   
-432   96     
464    544    
-80    96     
160    32     
16     -96    
-144   0      
16     64     
80     112    
32     16     
-432   -1072  
-240   -688   
400    -784   
-288   48     
288    96     
-208   32     
176    -384   
-416   -640   
64     -496   
368    -672   
-384   688    
-16    800    
48     -96    
-80    -272   
80     -240   
-80    -720   
16     -496   
656    -864   
-400   160    
-192   256    
-16    -896   
-336   -368   
688    -240   
-64    -16    
144    176    
144    176    
-32    -128   
-304   112    
320    272    
480    304    
80     -128   
336    -32    
-112   -48    
-240   144    
528    320    
1360   -16    
-1904  -384   
-96    -288   
1008   -992   
-352   160    
480    384    
-848   1136   
208    -1040  
256    368    
112    272    
-176   112    
32     -112   
-48    -288   
256    80     
80     -496   
-272   96     
176    -336   
48     656    
48     -592   
144    128    
96     96     
-608   -16    
480    80     
112    -320   
-16    -512   
-288   -400   
-64    -48    
16     -336   
224    304    
-208   -400   
-128   416    
96     -32    
160    -112   
-368   -432   
304    976    
272    656    
-272   -240   
-16    1280   
160    384    
32     192    
256    -48    
-160   0      
80     -496   
-224   112    
368    -272   
368    1040   
-304   -32    
-352   -624   
608    608    
160    304    
-16    -496   
-720   -592   
432    -688   
80     -1200  
-224   16     
-144   -976   
-304   -16    
432    144    
0      112    
-112   -1328  
-176   -224   
16     64     
336    400    
-96    -96    
96     48     
80     176    
112    496    
64     672    
-16    0      
128    -80    
-160   48     
240    -96    
48     -208   
-32    1264   
176    512    
-64    160    
144    -176   
288    -96    
-32    -96    
400    608    
-1632  1168   
1168   -304   
304    -656   
144    736    
-352   464    
32     16     
240    -400   
32     112    
176    848    
0      -208   
-112   112    
64     -576   
16     -1008  
-112   -240   
0      -336   
368    -48    
80     -176   
0      -256   
176    -192   
-32    96     
240    1648   
0      -2160  
-96    -544   
224    16     
32     -720   
144    -80    
-352   -576   
336    -448   
0      160    
48     208    
112    304    
-288   -96    
-144   -112   
368    -320   
128    64     
-96    48     
-176   -32    
176    0      
96     -1760  
-80    -336   
192    -112   
-256   64     
32     112    
368    -80    
-480   -16    
288    0      
-240   64     
320    -192   
-240   -304   
352    -1024  
-3024  208    
2128   240    
528    -144   
-704   -800   
-352   -80    
288    64     
-48    288    
-576   -48    
496    240    
192    16     
-400   -48    
160    -80    
-176   48     
256    48     
-144   -16    
-16    -304   
288    -112   
192    -192   
-32    -304   
-32    32     
384    -272   
-640   -784   
-464   48     
688    -32    
-672   0      
448    352    
-192   0      
64     240    
-32    128    
-48    -256   
-352   -64    
64     32     
224    112    
-96    0      
64     16     
32     -208   
-16    -240   
-288   -432   
400    -48    
272    192    
32     144    
-256   -192   
640    -128   
-768   -128   
-992   224    
1024   272    
-240   80     
-912   352    
304    -80    
224    80     
272    -416   
-640   208    
-304   -1200  
224    -192   
-176   64     
96     -288   
-160   -208   
0      -272   
-544   -208   
608    -112   
-544   -16    
-32    -304   
-320   192    
320    -512   
16     144    
-64    -320   
-64    -48    
-144   -160   
-32    -272   
-1456  -3472  
2464   -3520  
-208   1968   
-464   672    
-304   192    
816    -176   
-224   48     
-848   400    
416    -176   
432    -144   
240    -32    
-352   -64    
176    224    
272    -368   
16     -144   
80     16     
-304   -16    
-64    64     
16     0      
528    -192   
-1088  -352   
432    -208   
-256   -256   
352    -16    
432    -112   
-400   144    
-176   -96    
112    384    
-240   240    
-768   224    
-112   -64    
336    208    
-464   80     
192    16     
-32    16     
176    -256   
-320   240    
208    112    
96     288    
-448   -400   
16     112    
-320   -272   
-112   -48    
128    -192   
80     208    
-16    96     
-32    96     
48     48     
-96    192    
272    640    
-272   528    
-32    368    
-96    0      
688    -80    
-1104  -432   
64     -256   
144    -336   
96     416    
-400   864    
176    624    
-80    160    
48     144    
-48    32     
-288   64     
80     272    
-704   96     
0      176    
-128   -144   
96     -96    
32     -528   
-272   -448   
192    -288   
-192   160    
32     -48    
0      -48    
-48    -176   
-176   -512   
-288   48     
160    368    
96     368    
-592   -64    
-544   -864   
864    -1120  
-400   896    
784    -112   
-352   208    
64     144    
-208   208    
16     -64    
224    768    
-64    -112   
-160   -160   
208    -64    
-112   0      
-160   144    
-320   192    
128    256    
-256   64     
128    -256   
96     128    
-160   128    
-128   80     
-80    528    
448    112    
-320   976    
272    -176   
-192   -432   
256    608    
112    -48    
-112   144    
-96    -32    
176    400    
-1040  -464   
-80    -480   
272    -144   
112    336    
288    80     
416    -96    
-560   -336   
-128   384    
64     320    
32     -240   
-96    -32    
-16    288    
-288   96     
-112   -224   
272    32     
-640   0      
112    176    
-16    -80    
176    -560   
-832   -544   
480    192    
848    416    
-1184  -544   
1424   -976   
-16    -144   
-240   128    
592    176    
-16    256    
-208   -368   
-96    432    
-208   -320   
128    -48    
144    384    
16     336    
-32    -96    
-16    224    
224    0      
-336   -16    
192    -80    
-48    32     
672    1312   
-1200  -784   
-288   112    
976    768    
-32    -224   
-224   -688   
-192   -1088  
416    96     
-192   2208   
432    800    
-304   -1136  
-416   -592   
288    96     
192    720    
-384   -112   
-128   416    
176    0      
64     384    
288    -240   
-96    -80    
-224   128    
160    -32    
80     -16    
-144   -240   
752    32     
176    192    
-896   -976   
480    -768   
-576   -128   
-96    -128   
352    304    
-320   -304   
736    112    
-480   -176   
256    592    
80     -64    
-400   -464   
880    -1136  
-560   -16    
576    256    
-304   -80    
112    -96    
384    656    
-256   1056   
208    400    
-400   640    
-128   -208   
-128   -64    
-48    -208   
256    128    
1024   2048   
-432   816    
-576   -672   
1360   -704   
16     896    
-448   2096   
64     576    
32     -352   
528    -304   
-80    -464   
32     336    
-320   64     
240    -32    
-80    -384   
-144   144    
-304   160    
-32    272    
48     112    
0      528    
-128   -48    
-64    -224   
96     -256   
-224   160    
944    0      
-816   1104   
544    1120   
160    336    
-336   176    
176    -432   
160    -320   
-448   -608   
-16    -240   
416    608    
-160   624    
-144   16     
48     416    
192    464    
-176   64     
384    160    
-208   -128   
-96    144    
80     448    
-272   560    
352    448    
-64    -656   
-240   112    
-48    144    
-128   464    
464    608    
32     368    
-224   -144   
-304   -944   
144    -336   
368    528    
528    1408   
-432   1360   
112    1520   
304    864    
48     720    
160    -832   
-784   -96    
256    80     
496    -64    
-176   -48    
144    176    
-208   336    
400    96     
-352   128    
368    112    
-544   -96    
176    -144   
144    -80    
16     -272   
-48    32     
16     -32    
224    480    
-144   656    
-48    -256   
-32    -1216  
-144   -336   
-352   -800   
736    -2256  
-400   816    
976    -368   
-448   -16    
-192   32     
256    -96    
80     80     
208    -400   
-400   16     
160    144    
16     -2848  
240    -240   
16     448    
-272   -64    
224    352    
-48    32     
96     -208   
80     240    
-144   80     
128    -32    
512    -224   
-1424  288    
992    128    
-288   -480   
-752   112    
1120   -576   
-560   192    
160    -800   
-368   288    
624    -160   
-32    16     
-160   -96    
-16    -16    
32     112    
-112   48     
128    96     
224    -80    
-160   80     
-64    -48    
80     144    
432    80     
-304   96     
144    -496   
-144   112    
192    128    
128    112    
-160   96     
224    96     
-128   80     
736    -656   
-1264  -112   
144    -368   
192    -128   
144    176    
224    -48    
-400   -176   
464    0      
-512   -432   
512    -16    
80     32     
-240   112    
-112   16     
48     -112   
656    48     
-432   -752   
32     208    
80     -256   
-192   144    
368    -240   
-256   112    
48     -1008  
1024   672    
-544   -1536  
32     320    
1264   -80    
-1280  240    
656    -16    
128    32     
-144   -64    
128    -80    
-192   160    
64     -48    
144    128    
32     -224   
128    128    
-144   -32    
288    16     
-224   400    
112    96     
-224   64     
496    -1616  
-416   -320   
320    -1456  
-144   -544   
144    32     
224    480    
-304   352    
-32    -464   
-448   176    
544    96     
160    0      
-288   -176   
-32    -160   
160    -1296  
-240   -32    
0      -848   
576    48     
16     704    
400    -304   
16     128    
-192   -416   
-288   -144   
208    -368   
-64    32     
272    -96    
-432   144    
272    112    
208    -64    
-96    -80    
-1680  -2784  
2544   -2896  
-240   1696   
-816   128    
32     -32    
80     48     
-128   -224   
752    -64    
160    320    
-688   176    
-64    -816   
832    -256   
-272   160    
48     32     
-32    64     
320    -48    
-224   64     
112    -112   
-480   -96    
-176   32     
368    720    
-224   496    
-16    16     
352    -352   
144    -128   
-160   -608   
192    16     
-512   -240   
864    320    
-176   176    
-192   128    
352    80     
-32    192    
-432   -80    
448    640    
-64    576    
-256   480    
384    -96    
-224   32     
480    -32    
16     -160   
-144   208    
160    -880   
-96    -224   
240    -800   
368    208    
64     1456   
-240   960    
400    192    
64     96     
-352   -320   
16     -624   
-192   -576   
-160   192    
464    432    
128    496    
-128   592    
-128   -288   
128    112    
640    32     
-240   48     
-224   16     
128    -112   
32     -160   
192    528    
96     192    
-448   16     
-112   336    
464    -224   
-640   -384   
-128   -592   
-160   320    
384    -304   
96     32     
128    -928   
-48    -80    
0      -208   
352    208    
-144   32     
144    112    
-352   -32    
672    1264   
-832   752    
224    -368   
576    512    
-144   -16    
-544   -144   
-96    96     
560    336    
-320   -144   
-128   -320   
-480   384    
16     -384   
288    96     
16     -80    
-272   256    
32     112    
208    -176   
64     -208   
-112   -48    
-80    0      
288    672    
112    -80    
-48    32     
256    -240   
-336   -368   
-272   -16    
352    -112   
208    544    
32     240    
-96    -16    
-80    -400   
-16    80     
80     -208   
-64    192    
-208   -352   
-48    32     
-272   -128   
320    -224   
-64    -48    
-416   64     
-320   224    
160    -112   
-64    224    
48     -192   
-272   112    
512    -16    
-224   256    
-16    -48    
64     16     
-176   -192   
1456   368    
-2192  240    
-240   32     
-128   16     
64     80     
0      528    
64     16     
144    800    
-1616  112    
320    112    
208    -592   
-96    -336   
-208   208    
-80    144    
112    160    
112    -336   
-192   0      
-336   240    
512    640    
-240   -368   
192    -112   
-896   224    
1648   -688   
-1232  144    
432    112    
112    288    
-432   16     
-544   -1024  
544    432    
480    1264   
-240   1120   
576    512    
160    16     
-448   -16    
112    -48    
240    272    
112    -16    
-416   -416   
-96    -128   
240    272    
-336   32     
96     32     
-64    -32    
-192   -16    
304    -32    
560    -144   
352    0      
176    -48    
-64    1600   
576    544    
-112   128    
-48    32     
256    112    
48     304    
-576   288    
128    384    
-416   -64    
64     -496   
-1168  -64    
32     128    
-288   48     
0      16     
96     -144   
-368   592    
496    -16    
-416   -16    
208    -464   
-208   96     
-16    -144   
192    -80    
-544   -944   
912    -672   
-256   -176   
-144   320    
-880   688    
464    320    
384    -1136  
-640   -592   
-112   448    
-128   -64    
480    96     
240    -48    
-512   96     
-176   96     
80     -144   
688    144    
80     48     
-672   32     
64     448    
0      544    
208    -400   
-176   96     
-176   -352   
288    144    
-352   -192   
688    544    
-96    32     
-352   16     
272    -32    
208    96     
-96    16     
64     -192   
-608   -16    
240    544    
112    144    
80     48     
224    128    
-272   -64    
16     64     
80     80     
-32    192    
-48    192    
-80    336    
48     256    
-176   272    
-192   -32    
80     -944   
-816   -880   
64     -32    
464    496    
64     288    
-432   -160   
640    -224   
368    496    
-272   400    
160    416    
-192   -112   
64     -160   
160    -128   
-128   96     
-96    64     
112    144    
-32    -112   
-368   -128   
64     -32    
288    -16    
-64    -48    
-176   128    
176    208    
-16    -448   
16     0      
-176   240    
16     64     
-112   128    
224    32     
-304   -192   
448    -448   
-288   496    
224    16     
32     272    
-240   144    
1040   112    
-2912  1312   
1248   -176   
160    64     
-288   -128   
192    -80    
-16    -48    
-208   304    
0      96     
112    -64    
-112   -176   
-336   272    
224    -128   
64     -176   
-48    144    
160    432    
-384   128    
176    -128   
192    48     
-80    224    
-176   48     
752    1104   
256    -144   
-656   208    
-272   32     
-112   -48    
368    160    
-64    -128   
128    224    
-464   80     
16     64     
176    32     
192    16     
-304   128    
288    0      
-224   288    
176    16     
-352   -16    
288    80     
-272   16     
-16    64     
320    128    
32     96     
64     16     
-304   -32    
304    272    
208    32     
-320   224    
384    32     
-256   16     
-816   -2528  
192    -1136  
848    -16    
-1296  368    
1008   432    
-80    -1424  
-352   80     
176    288    
144    128    
208    16     
0      128    
-80    0      
-80    128    
160    192    
-16    160    
-48    208    
208    80     
-208   0      
80     144    
96     96     
-128   -160   
368    320    
384    -304   
-1536  384    
1152   -16    
-208   80     
-704   128    
400    -48    
336    0      
-368   176    
32     -112   
192    208    
-96    32     
-352   -336   
432    208    
-96    -112   
-256   128    
192    224    
32     224    
112    208    
-288   176    
-112   0      
144    0      
-976   112    
464    -80    
-80    32     
32     224    
48     192    
-528   -1200  
96     32     
320    400    
-416   208    
160    -2368  
-208   32     
96     224    
-160   16     
64     -80    
-208   128    
512    304    
48     80     
336    -32    
-272   192    
32     160    
288    -32    
-32    192    
-128   -288   
288    224    
176    -336   
240    64     
-144   176    
-592   704    
2256   1296   
256    -144   
-1504  -176   
64     -16    
-96    0      
736    192    
-160   -64    
-480   64     
464    48     
-384   -128   
320    -80    
112    -912   
-80    -176   
128    -400   
272    128    
0      -32    
-272   208    
320    16     
0      352    
-240   -80    
144    -336   
272    -16    
-624   -176   
144    128    
192    -400   
-528   64     
416    -48    
-432   -144   
128    -1104  
272    -608   
-256   -48    
16     208    
16     352    
32     -608   
208    -80    
0      -624   
-432   320    
-448   -1008  
496    -752   
64     -704   
-272   -112   
128    -128   
192    80     
48     -176   
208    -128   
32     -256   
192    -32    
-208   512    
208    -64    
48     -400   
-32    -576   
48     1088   
912    32     
-624   1088   
640    320    
-400   240    
80     -320   
416    1392   
-96    320    
48     -288   
64     96     
48     -1792  
-32    32     
-368   -208   
192    -448   
64     496    
160    32     
-384   -208   
80     -528   
112    80     
80     -16    
208    -128   
-80    -32    
96     208    
96     288    
-64    -32    
176    -208   
128    128    
-320   336    
48     48     
416    -96    
-48    -1008  
-272   -64    
-144   -816   
160    -176   
80     240    
224    -144   
-240   -176   
-176   160    
112    -144   
208    48     
0      -16    
0      -80    
-144   -16    
-32    144    
432    -272   
-336   208    
160    -208   
-64    -336   
224    -80    
-176   -784   
336    240    
288    -288   
-640   32     
240    -192   
-96    -64    
32     32     
304    80     
-16    240    
-304   -32    
-1184  -160   
320    16     
48     -224   
-32    64     
336    -96    
-320   -416   
96     96     
176    176    
-176   464    
128    32     
80     128    
-320   288    
176    -48    
-208   192    
-192   -48    
48     208    
208    80     
16     -224   
-272   -384   
608    -176   
-448   -560   
944    -80    
1776   -1248  
-1616  -336   
640    -1168  
192    16     
-304   -208   
-480   -1248  
304    1104   
-32    96     
-208   -720   
288    304    
32     -144   
-192   -64    
80     -384   
48     -192   
-192   144    
112    -592   
-96    -96    
352    -848   
-80    144    
176    64     
-1424  1376   
1168   -384   
-560   -512   
-384   -336   
464    160    
-176   1136   
-336   336    
-528   256    
720    544    
-240   416    
128    -272   
96     352    
-224   416    
96     -368   
64     -144   
-32    -144   
-16    -432   
-240   -256   
-192   -720   
96     -416   
-32    32     
-224   -400   
-144   576    
560    -416   
-16    816    
-736   48     
112    528    
-224   160    
32     -224   
0      -96    
-304   -176   
-128   32     
272    192    
-592   400    
640    -256   
-192   -32    
96     -240   
624    176    
-608   -112   
-80    112    
96     -96    
96     32     
272    -496   
-528   304    
448    64     
-96    32     
272    48     
96     240    
-848   1024   
-512   2480   
368    624    
-1056  -304   
-144   -320   
1168   32     
272    240    
-992   -496   
-1216  -80    
64     -192   
-208   144    
352    176    
-992   -64    
224    176    
96     -240   
-48    336    
352    -96    
-464   80     
480    -32    
-240   -768   
-464   -528   
240    528    
-384   -96    
224    -48    
640    32     
-880   0      
208    0      
-208   -64    
176    -32    
-1552  -144   
80     -64    
-80    0      
224    160    
-240   240    
320    624    
-64    -176   
0      432    
-400   32     
0      320    
528    144    
-224   80     
-112   -16    
16     112    
-224   -160   
304    -96    
-176   -304   
96     96     
208    16     
-224   -144   
144    -160   
-352   -128   
64     80     
-16    -416   
-800   272    
448    -48    
-176   0      
160    -176   
-128   -160   
128    96     
-80    160    
-256   176    
-336   -48    
-32    -16    
-160   -160   
144    96     
-64    -32    
-112   64     
-48    64     
112    48     
176    400    
-656   304    
384    16     
-80    32     
-128   48     
-32    -48    
-160   -48    
-416   48     
-96    272    
-32    -576   
-32    176    
96     96     
192    784    
-448   -2032  
-1040  448    
1744   -304   
-768   16     
-432   240    
224    480    
688    128    
-384   -288   
-176   48     
-96    48     
16     64     
-144   32     
-112   48     
-32    272    
48     288    
-240   -48    
272    32     
-272   240    
0      -112   
-32    224    
336    1152   
768    -336   
-1024  -160   
176    112    
640    144    
-336   224    
-608   -512   
144    304    
-160   -272   
-80    128    
400    32     
-160   128    
128    128    
-16    48     
64     32     
-480   0      
608    -32    
-352   -16    
288    32     
-320   -16    
176    0      
-304   -96    
144    48     
-320   128    
352    208    
128    64     
48     96     
-240   -48    
16     128    
864    128    
-2784  1248   
1968   544    
-448   80     
144    176    
-192   -352   
96     352    
80     848    
192    592    
624    128    
-240   -112   
-176   32     
-176   16     
80     -48    
288    176    
160    48     
-400   192    
288    112    
-464   -48    
16     144    
-16    0      
-32    -144   
864    496    
-1472  -32    
944    -400   
176    96     
-720   96     
240    48     
320    144    
224    -160   
-608   160    
80     16     
16     80     
-160   32     
208    64     
160    -32    
-400   176    
288    80     
32     0      
-192   272    
112    -32    
-64    128    
240    352    
-1120  -64    
864    64     
-288   80     
-272   -160   
672    208    
-400   -128   
-64    416    
480    16     
-192   64     
-240   176    
-96    16     
240    64     
288    272    
48     -176   
-48    160    
-144   144    
144    -64    
128    -96    
-272   144    
-240   272    
656    -224   
32     208    
-128   208    
-416   608    
432    -112   
112    144    
448    688    
-1568  896    
1456   880    
384    -496   
-976   -320   
-480   160    
464    208    
192    -176   
-96    1360   
288    464    
-528   368    
-256   624    
496    -96    
80     16     
32     240    
-208   208    
64     0      
-16    64     
128    128    
32     -32    
-96    -512   
-320   -944   
240    -256   
112    192    
-336   -240   
80     -976   
192    -224   
160    -1120  
-96    -672   
-192   -752   
80     720    
80     -160   
64     0      
-64    -16    
-320   160    
304    224    
128    528    
16     64     
80     192    
-496   -736   
80     -256   
208    496    
-160   -1168  
16     -48    
-48    768    
80     -720   
224    -912   
-144   64     
-80    -288   
-16    560    
128    528    
128    -176   
-192   240    
416    1024   
432    -176   
-544   -480   
560    64     
16     -480   
384    160    
192    528    
-224   -624   
112    32     
0      224    
-32    -144   
144    32     
288    368    
192    160    
48     -64    
-288   272    
160    304    
64     -64    
-96    -16    
-64    80     
128    80     
-16    -1680  
176    112    
176    192    
-48    96     
-352   -144   
176    -128   
-96    144    
-16    208    
-272   -304   
816    -992   
-16    400    
432    -224   
-592   144    
192    80     
-80    -208   
-160   -416   
-224   304    
-64    -1008  
128    -208   
144    80     
160    432    
48     240    
-288   240    
32     -80    
432    -80    
-112   480    
-192   0      
-32    -32    
-80    -208   
528    -384   
48     -128   
400    -128   
-336   -272   
144    256    
16     416    
192    304    
-304   16     
288    -256   
80     128    
112    128    
32     112    
-96    -160   
208    -16    
-64    -336   
240    48     
-16    -224   
464    -224   
-144   880    
256    432    
-96    -192   
48     160    
256    64     
64     176    
240    112    
48     -352   
-288   240    
608    -400   
-384   480    
1568   704    
-2512  672    
-112   -368   
1120   -160   
-544   -1712  
-624   -480   
240    352    
-64    -720   
208    304    
208    784    
32     832    
-304   336    
320    176    
160    -400   
0      144    
-336   -368   
96     -64    
272    -480   
64     480    
-224   272    
224    416    
-704   -480   
1232   -1360  
-64    -592   
-1104  1392   
2304   -384   
-1152  736    
1344   -112   
-544   -256   
-224   -2128  
432    -112   
64     288    
-96    -96    
-32    -256   
-272   48     
352    64     
16     -64    
-112   -432   
-128   208    
-240   -272   
400    -448   
176    112    
-256   -1120  
-64    64     
640    -896   
-336   -96    
592    704    
-272   128    
-544   -304   
-320   112    
256    -256   
240    -288   
-48    96     
176    320    
-624   64     
-128   -48    
848    256    
272    -368   
704    -496   
-112   -112   
16     48     
-16    -208   
64     -112   
-80    -352   
-144   96     
208    -96    
-320   128    
-96    -16    
112    -48    
32     -336   
16     -1664  
-496   -2160  
400    -128   
1632   320    
-800   128    
-672   368    
544    -1232  
192    48     
240    -144   
-400   272    
400    -16    
-160   96     
-80    -32    
160    -48    
-304   -80    
224    -16    
-464   -128   
-208   -96    
128    -96    
336    640    
416    0      
-896   -336   
512    112    
640    -736   
128    16     
-592   -32    
672    208    
-848   -336   
448    -48    
-80    48     
-32    160    
-80    -48    
96     -80    
-208   -64    
112    -240   
-704   144    
592    -240   
-720   -112   
640    -304   
-704   80     
80     80     
528    -176   
-512   96     
128    128    
-352   96     
608    400    
-256   -112   
-272   64     
64     -80    
-112   -208   
-224   -32    
160    -128   
-224   656    
1008   -384   
-688   80     
-176   -240   
704    96     
-64    32     
-112   96     
-48    80     
-304   80     
96     48     
144    32     
-160   80     
64     -240   
-112   -192   
96     -256   
-16    368    
32     -416   
448    -464   
-496   224    
288    192    
-80    48     
-208   -96    
-128   80     
176    112    
192    0      
-240   320    
256    688    
192    -32    
-208   -208   
1280   1664   
-2480  976    
640    -160   
752    -288   
-624   -80    
80     -224   
112    -736   
64     256    
304    928    
384    -352   
-544   80     
-32    160    
384    -224   
208    64     
-512   272    
-560   -160   
96     -80    
80     224    
-256   -176   
-384   16     
-864   -224   
768    160    
-464   48     
-288   -256   
96     -112   
-448   -16    
224    -304   
352    -144   
-880   32     
-128   112    
80     -96    
224    96     
-400   -160   
176    -64    
-224   -32    
128    64     
64     -32    
-448   -80    
400    -16    
-576   176    
112    0      
-192   96     
240    32     
-272   0      
368    48     
-432   -32    
336    112    
-224   176    
144    -80    
-336   -368   
1648   112    
-3008  1120   
-880   224    
1840   -208   
-1360  -192   
-32    48     
512    352    
64     416    
-240   288    
112    304    
112    -336   
-128   16     
96     176    
-192   -208   
384    48     
-432   -208   
-32    144    
-16    -160   
-16    0      
368    -384   
-256   144    
288    880    
-768   -768   
-1120  -288   
1664   -416   
-512   -944   
-224   -80    
-224   304    
176    -80    
-64    48     
-32    0      
-144   48     
-128   400    
528    -32    
-144   -80    
352    0      
-1088  16     
288    -16    
112    -336   
-96    192    
208    272    
-240   208    
48     336    
-400   -336   
-160   -32    
-288   288    
528    -160   
720    816    
32     -112   
-176   -32    
352    -32    
-512   96     
240    288    
-400   112    
-32    -320   
304    -208   
160    -240   
-336   -96    
48     528    
160    64     
-352   -592   
-288   128    
240    -16    
-112   32     
-96    256    
144    -80    
-112   400    
528    32     
-624   176    
0      304    
-256   64     
880    -736   
-2240  -720   
224    672    
1088   368    
-544   -144   
-64    -464   
192    528    
-272   1280   
400    -848   
176    -32    
-432   -192   
32     32     
-192   -176   
192    -240   
-224   416    
-224   480    
288    -464   
-48    -64    
80     -304   
-112   0      
-80    400    
16     -128   
176    80     
272    -192   
-512   -272   
112    -448   
-656   -1120  
16     -1056  
-192   64     
192    -96    
-432   -240   
96     288    
48     704    
272    384    
-496   -208   
-16    -720   
-176   -544   
96     -240   
320    848    
-320   192    
-144   -64    
192    288    
16     64     
80     464    
-16    -96    
-144   -224   
-16    368    
400    384    
-208   512    
16     176    
96     -320   
-352   944    
1392   -416   
-400   -352   
-32    -224   
32     -752   
672    704    
16     640    
32     -720   
64     -256   
32     -32    
-16    512    
0      288    
-32    -80    
-240   80     
48     0      
-32    48     
144    128    
272    -176   
96     96     
-160   -32    
-64    -80    
208    64     
-128   256    
-64    -32    
96     -32    
-320   -48    
64     -336   
256    192    
-80    96     
48     48     
256    -192   
-672   320    
192    144    
-48    256    
304    464    
64     192    
-16    144    
-112   784    
240    496    
-208   176    
-80    64     
-16    0      
208    32     
-192   176    
16     448    
-32    160    
-48    -16    
-112   -112   
48     -96    
32     48     
-32    1072   
864    80     
-928   352    
592    352    
-448   624    
192    144    
96     160    
0      832    
-560   -320   
208    -416   
448    32     
160    480    
-496   -528   
-144   256    
304    48     
368    -1776  
-80    432    
-400   -288   
-48    544    
240    -384   
208    320    
112    112    
-368   112    
-96    -64    
416    176    
-96    -32    
-80    288    
-208   48     
496    -288   
-960   -576   
1392   -4224  
-224   80     
-224   -96    
464    64     
-400   176    
656    -128   
-384   -336   
288    -144   
-48    -208   
224    80     
-192   -112   
48     192    
-96    -80    
224    -192   
-144   -16    
-64    -608   
-16    -112   
-128   -304   
-48    112    
160    240    
16     96     
-592   48     
1440   -496   
-336   592    
-32    -16    
-64    368    
816    256    
-656   -304   
416    -240   
112    272    
-112   -512   
448    128    
-128   -2288  
-240   32     
320    112    
-160   80     
240    -208   
32     128    
-16    224    
224    16     
-272   -16    
304    48     
-752   464    
400    -208   
-192   496    
176    240    
256    1248   
-1168  -208   
-800   -608   
896    -848   
544    192    
-544   256    
0      272    
288    64     
48     -368   
496    -272   
-752   -64    
16     80     
992    48     
-240   432    
-576   160    
-128   160    
464    -464   
-208   176    
-80    0      
144    656    
288    -176   
-304   192    
384    64     
-576   -1280  
-2080  -1984  
384    -784   
-64    752    
160    336    
496    224    
-176   32     
-656   80     
352    -48    
448    352    
-480   -160   
448    80     
96     32     
-176   128    
32     128    
64     160    
176    -80    
-64    -112   
176    48     
496    416    
-1024  288    
656    192    
496    -80    
-496   -176   
-608   -64    
-224   -720   
512    160    
-80    0      
176    -112   
-144   64     
208    16     
128    -2544  
208    176    
-176   80     
16     64     
-368   -160   
496    320    
-80    160    
-272   0      
896    -224   
-432   80     
448    -704   
-496   96     
144    96     
352    96     
-1536  -96    
128    -432   
-352   -304   
352    -304   
-128   -176   
336    -1072  
-272   -336   
272    576    
-992   272    
544    -624   
-160   -80    
-96    -432   
336    576    
416    -16    
80     -368   
-272   -16    
80     -64    
32     -64    
32     -160   
112    -64    
-16    -352   
-64    -112   
48     288    
272    -160   
-80    -352   
-176   128    
432    0      
160    128    
-192   -448   
32     -112   
-80    0      
144    -192   
224    16     
-112   -576   
-32    -112   
-16    128    
-592   -992   
1808   912    
-880   32     
-608   208    
736    -32    
-640   -48    
288    -16    
128    272    
432    1056   
-272   -256   
-112   -624   
96     80     
96     -272   
-48    176    
-96    -448   
336    -336   
-144   112    
256    -32    
-176   -96    
144    176    
128    64     
-368   -992   
656    -368   
-256   480    
-912   80     
512    -160   
-208   -208   
272    -256   
-432   384    
208    -256   
-128   -128   
176    -320   
-96    -64    
48     288    
272    64     
-304   128    
128    -208   
-144   144    
144    -64    
-16    320    
128    -112   
-240   -112   
80     -96    
0      32     
144    -272   
-16    -32    
-192   -352   
304    -64    
-144   -64    
32     48     
-576   -544   
2144   -992   
-1232  128    
192    -288   
576    -176   
-624   -176   
-176   -144   
-48    -64    
-128   176    
64     112    
-176   192    
192    -224   
64     64     
16     -1184  
-96    32     
64     112    
-16    80     
-192   32     
80     -48    
-64    -48    
112    32     
144    800    
-1392  32     
272    384    
48     528    
-144   -32    
160    48     
16     16     
480    128    
160    112    
-176   -528   
-416   32     
160    96     
224    -208   
-256   -192   
64     -112   
96     112    
-192   160    
464    -272   
-16    32     
-16    240    
-112   -64    
0      272    
240    -32    
-160   -224   
48     288    
64     -224   
-608   -1008  
-560   128    
240    48     
-720   144    
48     -80    
-80    -336   
32     -320   
-1184  64     
496    176    
-688   -1056  
240    -48    
-480   -464   
-208   -160   
112    400    
-176   -32    
-128   -272   
-704   -304   
32     -80    
32     -208   
608    128    
80     64     
-64    -368   
-192   -192   
-80    -32    
800    2096   
-400   704    
-560   240    
2256   -1024  
-1264  112    
-336   32     
512    416    
224    480    
-384   -448   
-1344  368    
128    -448   
-16    320    
208    48     
64     -448   
-224   592    
16     -592   
-176   -160   
112    304    
-368   336    
400    608    
-144   896    
-128   -192   
224    -176   
-400   -208   
-96    112    
160    1744   
-656   -144   
-32    448    
400    1072   
-32    -112   
-128   64     
-368   -464   
48     208    
80     -416   
320    160    
-48    720    
-304   384    
-16    -32    
384    -1328  
-112   544    
-32    144    
-496   -576   
96     112    
16     -256   
32     -752   
-128   272    
-64    272    
304    -1072  
32     928    
-48    208    
-384   272    
-224   272    
1120   -112   
-416   336    
-32    800    
144    704    
144    -416   
-144   -32    
32     288    
-192   480    
48     -16    
272    -32    
160    336    
-624   -16    
-192   48     
112    -176   
-240   -48    
224    400    
-368   -176   
-304   432    
144    256    
-192   -128   
96     -80    
-272   128    
416    576    
-144   688    
240    544    
112    880    
0      320    
0      48     
-80    288    
576    848    
336    64     
-768   -848   
-80    -336   
-144   -464   
272    -784   
288    656    
-704   944    
-304   544    
-96    -224   
192    -352   
48     528    
32     -384   
-208   432    
64     224    
-64    320    
-96    224    
-64    32     
-32    -208   
48     352    
128    1184   
16     -176   
-448   -464   
32     752    
-128   368    
0      -560   
-144   320    
-16    112    
144    480    
-160   768    
-32    112    
160    160    
-112   704    
-240   -112   
48     304    
0      -272   
224    -400   
-288   -80    
144    -64    
-32    96     
32     128    
48     -32    
112    -32    
-128   -64    
368    -64    
-144   128    
-112   128    
-32    96     
64     32     
288    1632   
688    -800   
-2416  160    
1808   -80    
-432   -272   
-832   256    
1056   -80    
-112   32     
64     -80    
-112   176    
80     -64    
16     144    
-192   -16    
400    256    
-688   -112   
272    272    
16     -48    
-160   -128   
-32    -48    
192    32     
96     112    
-144   176    
-192   -112   
1952   -32    
-1136  -16    
256    144    
256    208    
-368   -128   
704    608    
-816   32     
-128   48     
144    32     
-160   128    
48     -64    
-112   48     
384    128    
-80    128    
16     96     
-32    400    
176    64     
-384   128    
16     32     
-320   -544   
48     592    
384    -224   
-288   64     
384    848    
-176   304    
672    64     
432    240    
432    -48    
-160   -48    
-352   80     
352    0      
-160   224    
-144   640    
320    576    
352    688    
160    640    
-32    576    
-272   -480   
-416   96     
-64    128    
112    144    
256    -208   
-368   -32    
304    -128   
-96    160    
-672   32     
160    96     
-432   -1552  
-1856  1088   
752    176    
-928   -496   
320    -192   
400    -48    
176    352    
-1056  32     
-128   -112   
1104   352    
384    -80    
-288   16     
-128   176    
160    224    
288    112    
32     176    
-192   0      
-128   80     
192    48     
-16    160    
528    -848   
-528   272    
832    -1888  
-672   160    
688    160    
-384   32     
-96    240    
768    -336   
-640   128    
560    -64    
-64    176    
80     96     
-16    160    
80     144    
-176   48     
608    -192   
-480   -160   
272    -752   
432    128    
16     -176   
128    192    
-64    192    
448    144    
-192   -272   
320    -32    
-16    560    
-368   352    
256    80     
64     32     
-256   80     
256    -448   
-352   -112   
592    320    
-880   416    
448    -2864  
-96    -448   
-384   80     
368    128    
-192   -96    
320    96     
192    144    
16     -80    
-176   -64    
32     -64    
112    80     
-96    64     
128    176    
144    112    
32     144    
-96    -640   
0      -208   
32     288    
112    80     
80     336    
240    144    
-112   160    
-192   272    
48     0      
-128   -816   
176    -320   
0      -320   
-192   32     
1520   1728   
1040   -80    
-1936  -1152  
1008   -720   
-432   448    
400    -96    
-144   -496   
96     -240   
-400   -288   
256    16     
320    -336   
-96    -48    
-192   48     
160    -608   
160    -96    
96     -144   
-240   224    
-80    -160   
160    80     
128    -16    
0      -592   
-32    -544   
304    448    
-192   512    
-272   752    
384    208    
64     -112   
-16    240    
-32    -288   
-32    256    
48     -176   
64     16     
208    -48    
-192   -16    
192    224    
112    0      
-368   -176   
-48    304    
288    64     
32     160    
-96    -2864  
-96    -304   
64     160    
32     -208   
144    320    
-288   -32    
112    128    
-16    -352   
352    16     
-608   336    
-880   -64    
2896   -592   
-1168  -96    
-704   48     
736    -64    
-656   -272   
192    -1440  
528    -1616  
-176   304    
-176   -64    
224    -80    
320    48     
-320   -32    
112    -224   
384    -112   
-304   -224   
-80    -64    
272    -576   
-192   -1056  
-352   0      
128    -80    
1088   -48    
-1552  -176   
176    -1136  
768    -624   
-512   640    
-64    -160   
176    -848   
-240   -816   
-192   -832   
-16    -240   
144    160    
-192   192    
-80    224    
80     -336   
-96    -272   
32     -208   
112    -576   
-528   -1456  
96     -928   
80     144    
240    64     
16     640    
-544   -1344  
-112   -352   
176    192    
80     288    
-304   -400   
96     1280   
32     1792   
-400   64     
368    -624   
-16    64     
-416   0      
96     416    
656    96     
96     -224   
32     -80    
-720   -496   
704    624    
-448   -32    
-32    496    
112    -48    
288    -160   
-80    256    
368    -304   
-240   -224   
304    16     
-272   -144   
-80    -352   
-112   32     
1200   576    
896    -192   
-1328  -784   
-96    224    
464    800    
240    704    
-544   -1408  
-448   -1440  
-32    512    
-256   -128   
432    -240   
-192   -336   
-768   -384   
144    -192   
-48    64     
32     -480   
240    0      
336    -240   
-192   64     
-288   -560   
160    160    
256    192    
-720   -64    
224    -144   
208    -368   
-16    -224   
368    -672   
-544   -96    
144    1040   
16     -96    
208    -112   
288    0      
112    -432   
-304   96     
-144   0      
528    -272   
-176   -832   
-496   656    
176    1008   
-16    -832   
32     -224   
176    -480   
-400   -336   
144    -656   
336    -64    
48     960    
352    560    
96     336    
16     -96    
-48    -176   
304    832    
-592   496    
-144   -304   
704    336    
-528   224    
-176   144    
416    528    
208    1200   
-80    384    
192    -80    
-144   -976   
-160   -128   
64     -240   
-400   -32    
0      48     
-480   48     
-48    -272   
-352   -224   
128    112    
336    352    
-192   416    
160    176    
-80    96     
-1504  48     
416    -208   
-848   -240   
128    -80    
160    288    
-176   448    
16     48     
-848   -2080  
192    -656   
-528   -576   
-112   -80    
704    720    
-496   400    
304    672    
-144   32     
-64    -608   
-80    -288   
144    -32    
-112   32     
-48    128    
0      240    
-32    112    
-128   -320   
-80    -560   
96     -736   
96     64     
-1152  -96    
-80    624    
-912   -448   
448    288    
576    -112   
-832   208    
544    -32    
-528   256    
160    -64    
80     -80    
48     128    
32     -112   
-48    176    
-112   -112   
16     128    
-304   -96    
-176   144    
240    -80    
-240   272    
512    -256   
-704   128    
496    -96    
-480   16     
288    144    
-64    -32    
-48    0      
368    -16    
-224   32     
-224   80     
176    96     
-304   80     
-1792  256    
-1664  -1232  
2512   80     
-1040  -704   
-1072  -400   
16     -208   
1376   144    
-704   -64    
-48    464    
176    -64    
-176   224    
48     -192   
-320   64     
144    64     
96     224    
16     32     
-336   -80    
64     160    
-192   -32    
-128   304    
176    112    
144    80     
-1712  -128   
576    -64    
992    240    
-352   -96    
-240   -112   
512    -80    
-256   -304   
-272   208    
-80    144    
96     -144   
144    32     
-416   -64    
512    -96    
-640   272    
288    16     
-32    -464   
-352   -256   
352    0      
64     -16    
0      16     
112    416    
496    -496   
-1136  272    
288    224    
-400   544    
528    464    
-560   176    
-336   -80    
-256   272    
48     -128   
128    544    
-256   288    
-64    -48    
-208   336    
96     128    
-176   112    
-384   416    
48     176    
-240   0      
-192   144    
-144   64     
96     0      
208    48     
-112   -544   
-592   368    
336    320    
-560   64     
-208   -704   
2784   4336   
-1872  1536   
-16    -544   
848    -16    
-272   0      
464    272    
-1152  192    
720    -32    
192    288    
176    -64    
-272   304    
-256   160    
304    32     
-96    32     
112    16     
-288   272    
416    16     
-336   176    
560    16     
-992   -448   
512    -32    
-416   16     
144    48     
304    160    
-320   16     
128    160    
-80    -96    
48     80     
-16    -352   
-512   -240   
224    -240   
64     176    
16     64     
-448   64     
208    160    
-32    352    
144    240    
-512   0      
-128   -80    
-176   -64    
32     -80    
144    0      
-112   80     
144    320    
-192   176    
-256   48     
240    48     
-208   -288   
144    -272   
-160   -144   
80     80     
-32    -32    
288    -240   
144    496    
304    1760   
432    1120   
-240   -64    
-48    240    
-112   448    
96     64     
-240   -368   
-80    -112   
-64    -80    
0      -96    
176    -480   
-32    64     
-176   176    
-224   176    
96     0      
128    144    
208    512    
-448   -32    
368    -928   
-336   192    
448    592    
-352   80     
-112   -320   
272    -16    
208    736    
-112   704    
-368   -1888  
704    -224   
-1152  1232   
1248   -448   
-80    -464   
-400   624    
192    -80    
96     1936   
48     -496   
-64    32     
128    368    
-192   144    
32     -32    
160    48     
0      -128   
-144   -32    
368    320    
128    -432   
-96    -64    
48     224    
16     240    
528    96     
-1120  1040   
544    -336   
336    -800   
64     -64    
-64    320    
-96    304    
464    -560   
16     -352   
96     432    
-16    -240   
-32    -2304  
96     -144   
64     -16    
-160   96     
-16    -96    
16     352    
352    512    
-336   -96    
-208   -960   
400    128    
80     128    
-192   96     
0      128    
192    -352   
-192   -208   
336    -288   
-16    96     
-128   -144   
208    80     
224    -528   
-3088  -688   
1360   240    
384    -448   
-624   -624   
256    400    
-208   -512   
-464   -80    
272    400    
288    -608   
-16    256    
-240   80     
96     -16    
-48    -384   
0      -32    
0      -336   
96     16     
16     16     
272    -128   
192    32     
-480   -464   
1408   144    
-1152  224    
528    -1008  
64     -832   
-496   48     
528    592    
64     1088   
-128   -784   
160    -896   
-176   -1056  
32     688    
128    64     
256    -176   
-16    544    
528    720    
-192   208    
176    -144   
-32    384    
-80    -192   
352    160    
16     -272   
-160   1056   
560    -512   
368    688    
-256   1248   
160    640    
-880   -512   
688    -544   
368    1168   
-256   704    
608    752    
240    -176   
192    416    
-688   -544   
752    -208   
112    304    
80     848    
432    176    
-432   -32    
384    -80    
144    80     
256    496    
-128   544    
16     144    
368    -384   
-368   -32    
-128   -528   
-256   -256   
128    -336   
-560   -1296  
1456   -2272  
-96    448    
400    1168   
-688   1200   
-160   -304   
960    -336   
-464   -1232  
-576   -2368  
288    720    
320    704    
288    -688   
-48    -800   
-624   -112   
240    192    
512    192    
-160   -192   
-192   -144   
-288   -528   
480    -2752  
272    784    
64     496    
-48    48     
-640   -48    
288    -1104  
224    -32    
48     400    
272    448    
-352   -608   
208    640    
96     -1664  
0      -528   
384    -192   
-80    368    
320    -384   
-144   -480   
16     160    
464    288    
-368   -512   
-144   -1072  
-848   -608   
-176   -416   
32     16     
80     144    
288    224    
-48    288    
368    96     
144    608    
128    272    
-128   -544   
32     -96    
800    880    
-720   112    
-528   -272   
864    -208   
-368   -80    
256    464    
144    400    
-64    224    
256    -576   
-256   -688   
128    -112   
-128   -128   
64     -96    
112    -112   
-32    160    
-32    352    
320    272    
48     928    
448    400    
0      336    
-144   96     
160    224    
224    -64    
-224   -112   
-112   -192   
352    192    
272    144    
-336   224    
32     16     
112    32     
-48    2000   
1872   -880   
-1696  336    
352    -176   
-240   48     
368    -224   
-496   -144   
160    -32    
592    -288   
-256   32     
320    -160   
-160   -240   
-160   144    
128    -2160  
176    -112   
496    368    
-224   32     
-224   -224   
352    -576   
-192   -32    
848    816    
-1808  448    
768    16     
-128   -128   
-528   -384   
560    48     
-368   0      
128    0      
16     144    
448    -32    
-320   16     
-48    160    
128    -16    
64     0      
-80    -16    
144    -48    
-320   -48    
48     -80    
-240   -48    
304    -160   
16     48     
-336   -112   
64     144    
16     -304   
464    80     
-640   -32    
640    16     
-560   32     
64     16     
16     -400   
240    -864   
144    640    
368    -176   
-800   -240   
576    400    
128    112    
-736   -32    
320    -128   
64     -960   
-32    -128   
-416   48     
416    160    
-208   -32    
-48    0      
384    96     
-192   -48    
-336   -48    
400    32     
288    224    
0      32     
0      208    
-1760  -864   
176    304    
720    -224   
-2288  -528   
1040   80     
-416   16     
-656   144    
1136   -80    
-272   -64    
-176   32     
192    144    
16     -48    
-176   80     
-320   -336   
80     144    
208    -224   
-112   112    
144    416    
0      320    
-64    0      
-144   -416   
800    -112   
-1216  -96    
576    256    
64     16     
-880   -288   
-128   -880   
-16    32     
-624   224    
208    128    
432    -272   
0      144    
-192   304    
176    560    
-784   128    
208    -192   
0      -272   
-320   -96    
512    128    
-1184  48     
192    -32    
-288   -80    
64     112    
32     -240   
256    304    
48     -352   
-416   48     
416    -32    
-560   -432   
-736   -5280  
-672   32     
1824   704    
-944   64     
416    400    
-512   16     
-384   224    
64     32     
-64    -112   
544    -272   
-128   240    
80     -224   
0      48     
-272   176    
368    -80    
112    240    
-208   80     
-256   0      
-400   -608   
448    -1232  
-96    -1056  
-48    -384   
-1232  208    
-592   -64    
336    144    
192    -96    
-224   64     
224    112    
-144   224    
64     496    
304    192    
-160   288    
-176   -80    
-48    112    
352    272    
-432   112    
544    -208   
-176   -720   
-336   128    
32     0      
0      112    
448    560    
-256   720    
-112   48     
32     -528   
-256   -432   
-112   -752   
272    -224   
-288   432    
352    288    
-304   -528   
448    624    
-688   352    
208    -128   
-160   -224   
-128   -144   
240    -832   
64     -2144  
-496   -1824  
-96    -912   
-64    -144   
32     64     
80     96     
-48    400    
-160   64     
-224   -288   
208    144    
-16    272    
16     0      
-160   192    
64     160    
48     576    
80     -16    
-80    32     
96     -160   
-144   16     
-32    -144   
16     -112   
-16    352    
32     -80    
-368   48     
240    464    
-160   320    
368    -16    
336    48     
240    -128   
-240   224    
16     -352   
-64    -400   
-32    -192   
-64    80     
64     192    
48     208    
16     128    
160    48     
-192   -64    
-32    208    
-96    352    
128    96     
-16    192    
-288   -16    
432    -224   
-1504  176    
944    96     
-80    -288   
-96    -288   
32     272    
-336   -16    
208    32     
176    288    
-160   -48    
-208   80     
-96    -48    
-112   144    
-112   112    
208    -48    
-160   160    
-240   0      
240    288    
224    0      
-400   80     
-112   208    
-16    160    
80     -48    
48     32     
112    -128   
-112   -16    
-112   128    
-16    64     
128    160    
-192   112    
112    -560   
-2240  -368   
1056   432    
-928   144    
-80    240    
288    704    
-144   -704   
-608   688    
512    816    
80     848    
144    80     
-288   -640   
-80    784    
-64    -304   
288    416    
48     240    
-64    240    
-352   -192   
80     -48    
144    -256   
-176   80     
528    448    
1040   -144   
-1184  -64    
592    -448   
-400   -464   
-128   192    
240    -960   
-208   -1120  
16     288    
224    592    
-16    -96    
80     -48    
-112   96     
-64    64     
-96    80     
-128   400    
144    256    
-208   128    
16     368    
432    -288   
32     16     
128    176    
-336   400    
384    272    
-160   -1040  
-432   -448   
-560   -1968  
-96    -864   
704    -208   
-816   256    
512    160    
48     -496   
-96    304    
-144   -432   
656    -640   
-528   208    
240    -1456  
-96    -192   
-208   0      
288    -960   
-16    288    
400    16     
-64    -32    
-336   160    
560    160    
-864   448    
256    -32    
160    480    
-384   1072   
-448   -1392  
1152   -2544  
224    -2032  
-32    128    
-736   -1664  
-32    -304   
688    -528   
-288   592    
-320   608    
400    576    
48     176    
-32    48     
-144   -64    
-224   352    
368    48     
80     -80    
-48    80     
144    -464   
-320   -224   
448    -1440  
-208   -1504  
-160   -576   
160    304    
240    -288   
-160   32     
-16    0      
304    48     
-176   -272   
80     -192   
208    -112   
-192   48     
192    16     
-96    -208   
128    192    
240    -1344  
-48    -16    
-176   16     
464    944    
-176   224    
64     224    
288    0      
-112   352    
368    608    
-336   256    
-288   96     
512    -96    
-176   -208   
-512   -240   
368    -48    
128    -1232  
112    0      
-144   -112   
384    624    
688    144    
-560   -368   
-128   160    
672    96     
-304   144    
160    0      
48     -304   
-464   -176   
320    112    
0      -176   
128    224    
32     -176   
-256   -176   
592    -352   
160    208    
-160   -144   
320    752    
96     32     
-128   -720   
-32    512    
16     -64    
144    -32    
0      -272   
-32    528    
-304   -96    
272    -16    
128    -112   
-80    112    
1360   2640   
-3056  736    
288    -160   
1248   32     
-784   -256   
256    -48    
-208   608    
560    -112   
-384   -32    
576    -384   
-240   304    
-304   -224   
352    224    
240    -416   
-384   -192   
160    272    
-128   -1104  
96     -96    
224    -288   
80     -688   
-368   -464   
800    -880   
-576   96     
-32    -2752  
512    -256   
-464   64     
256    -224   
48     368    
624    -48    
-688   -352   
80     -64    
96     96     
512    16     
-416   112    
-112   -112   
-16    -128   
288    -608   
80     -368   
64     16     
176    -48    
-112   -128   
272    -96    
-80    128    
32     -80    
-32    -128   
576    80     
-576   16     
256    48     
-128   96     
176    -96    
-1504  -1376  
-2544  -1216  
3344   -192   
-592   288    
-368   368    
-112   -480   
416    -448   
368    -960   
-1168  -64    
864    -192   
16     128    
-80    -208   
-160   80     
-48    -112   
-384   -80    
448    96     
-176   -96    
-96    96     
144    -320   
-112   112    
160    -752   
352    960    
-688   -960   
-208   384    
80     64     
560    -544   
-448   -240   
560    -96    
-208   128    
48     -352   
-80    -80    
-80    -192   
-656   -16    
112    -304   
208    -80    
-352   -224   
-96    -48    
32     -416   
304    -64    
128    -96    
-112   48     
0      -48    
-208   -304   
208    128    
192    48     
-736   -224   
800    48     
-1072  -208   
0      -144   
144    -48    
-272   192    
272    -16    
-240   -864   
-48    -128   
96     -560   
-80    -288   
-304   192    
496    -64    
-400   -48    
160    0      
-80    112    
0      -96    
-48    32     
128    -144   
-32    64     
80     -352   
-528   176    
416    -512   
-112   48     
-96    -752   
160    -720   
1424   -2800  
-432   368    
32     256    
-736   192    
112    -144   
96     32     
128    304    
-304   -192   
-320   -16    
64     -368   
320    144    
-416   -48    
480    208    
-400   -352   
416    -144   
-368   64     
320    -256   
-400   -32    
208    -608   
-288   752    
304    608    
-32    384    
240    -352   
-464   -272   
464    0      
-144   256    
-112   320    
656    944    
-144   352    
368    -672   
-16    -560   
-160   96     
16     512    
0      -160   
336    -32    
-160   -336   
-48    -176   
288    -160   
-64    -128   
32     160    
48     656    
208    560    
416    752    
0      720    
-816   -416   
-448   -496   
-272   448    
-304   48     
-224   -160   
208    32     
-480   80     
432    912    
384    576    
-144   784    
-400   -432   
-416   112    
32     16     
-704   -96    
448    -1072  
-112   400    
-64    -368   
-112   480    
-192   -160   
400    0      
208    192    
-128   112    
-272   192    
96     64     
-128   288    
128    -144   
-192   112    
-48    -64    
32     64     
128    80     
-128   -80    
-32    -128   
-688   -64    
384    384    
-192   -32    
-144   32     
-1088  96     
-304   720    
944    -592   
-720   48     
-144   -32    
48     144    
-96    -96    
-208   336    
304    -336   
-464   -368   
32     128    
0      128    
176    -96    
48     -80    
-432   144    
-624   -144   
176    -208   
16     -256   
-80    144    
-240   128    
256    560    
80     -112   
-48    0      
768    -16    
-832   208    
208    96     
-112   -432   
-256   -384   
192    240    
16     160    
224    112    
-224   112    
-480   80     
208    -16    
128    -176   
-64    208    
-176   64     
-48    512    
320    304    
-160   128    
-112   -176   
224    -160   
288    224    
-272   304    
272    256    
-272   256    
-208   80     
-288   -128   
112    128    
-336   -32    
928    176    
-2832  128    
288    288    
720    -560   
-544   -928   
224    432    
-32    1584   
-288   -560   
224    -1536  
32     320    
-192   512    
-80    -80    
-448   -240   
48     128    
80     -240   
-32    16     
-16    -208   
-304   -736   
64     -336   
64     336    
-160   288    
336    880    
1824   128    
-1584  944    
1088   -1568  
-752   -736   
96     544    
-32    1232   
752    992    
-272   -432   
128    -592   
-16    -208   
48     480    
80     -32    
-336   -32    
736    160    
-256   224    
272    448    
-368   224    
-352   -64    
224    -64    
112    -80    
240    288    
-336   -1520  
1472   -2128  
-432   -752   
-528   384    
816    800    
-512   -144   
-32    16     
512    384    
-64    16     
-272   -144   
-144   -448   
0      336    
608    832    
608    -80    
-528   -416   
688    64     
48     800    
-96    -192   
-256   272    
544    -32    
-16    192    
-256   224    
-240   -656   
272    48     
272    192    
-656   32     
-352   -288   
336    -1248  
1504   -2528  
-416   288    
832    448    
-736   224    
-576   400    
1024   624    
320    368    
-592   304    
96     80     
48     48     
160    208    
-48    -80    
-112   288    
192    48     
-16    96     
-160   96     
208    0      
-624   -368   
992    -800   
-416   16     
192    32     
-112   160    
-752   -32    
448    16     
256    96     
-272   144    
-32    96     
-64    16     
-64    -48    
112    16     
16     -80    
-368   192    
640    368    
-176   352    
-128   352    
192    176    
320    -128   
-144   0      
112    -16    
48     256    
240    16     
-176   176    
32     -160   
-224   96     
144    64     
192    -16    
-320   16     
240    -16    
-48    160    
128    96     
-176   -384   
784    -208   
64     32     
-336   -144   
32     192    
64     224    
-272   288    
224    176    
80     416    
176    -128   
-208   -704   
224    48     
0      16     
-176   144    
272    -48    
-48    -288   
-160   -288   
-64    64     
224    -224   
-96    384    
-32    0      
144    192    
-144   -48    
224    208    
-224   480    
-32    -1888  
80     48     
-144   256    
144    -48    
96     128    
-896   -1552  
736    -256   
160    64     
-1248  -400   
928    368    
288    -272   
-352   496    
-384   -736   
-1008  -288   
368    336    
-144   -240   
64     192    
-96    -800   
16     -144   
192    -16    
-112   288    
64     -240   
144    -32    
160    -16    
-64    16     
-48    -656   
-224   560    
112    -16    
-224   -32    
528    64     
-144   -560   
-336   272    
160    -1056  
-192   64     
240    -528   
-48    -48    
-16    -160   
-208   304    
192    -192   
112    192    
144    16     
-528   208    
-160   96     
640    -96    
-48    96     
-192   -336   
-224   128    
224    -288   
64     160    
-32    -960   
32     208    
-112   -176   
112    224    
144    48     
32     320    
768    224    
-400   1200   
832    -16    
432    -128   
-848   -48    
-160   272    
480    144    
224    -288   
16     -160   
-96    -208   
-96    176    
128    -16    
80     112    
112    -208   
-464   16     
416    32     
-224   224    
288    368    
-32    320    
400    304    
-304   -240   
400    368    
1120   -368   
-688   1088   
-160   -656   
-32    144    
144    304    
544    -80    
-32    144    
-144   192    
-32    -16    
272    -224   
96     112    
-80    -48    
-192   272    
656    -128   
-64    160    
-48    -128   
-144   0      
384    -448   
64     -16    
16     96     
432    128    
-128   272    
32     -688   
-464   384    
304    128    
-48    -112   
304    -16    
192    144    
-48    -240   
-304   -704   
-384   128    
752    112    
-496   16     
432    480    
272    144    
-320   -224   
176    32     
160    -608   
192    -672   
-32    -16    
-16    -432   
-16    -112   
112    -2592  
-256   -368   
496    -80    
-32    160    
-400   112    
528    1104   
2336   2144   
-2608  1472   
1440   -528   
832    416    
-704   -256   
-592   768    
-80    560    
448    -112   
48     -560   
368    -224   
-80    -16    
-128   -128   
368    -304   
32     -1344  
16     256    
-320   384    
-80    64     
64     48     
16     -144   
0      -240   
0      -208   
144    -32    
256    0      
-320   464    
-160   256    
0      240    
176    -48    
224    -48    
-64    -1312  
-144   -512   
-400   -352   
128    160    
512    -288   
-112   64     
-256   640    
-112   176    
-112   -96    
304    1216   
-32    -368   
48     -592   
288    368    
112    -176   
-96    -256   
96     -832   
256    416    
-96    480    
-48    -608   
256    -1008  
-64    400    
-128   -384   
144    128    
352    864    
-880   464    
-288   224    
608    -528   
-144   -16    
16     -432   
272    752    
-384   -416   
304    -608   
608    -640   
-464   480    
-64    -272   
-176   -432   
240    160    
224    112    
-256   160    
160    256    
-144   16     
224    -192   
-496   160    
-224   -32    
-16    48     
64     -1008  
0      128    
0      -1840  
160    -48    
-208   -176   
-16    112    
256    0      
-112   -160   
80     192    
-80    -208   
64     -80    
368    32     
-272   -160   
48     -96    
0      144    
384    -752   
224    -144   
288    -1200  
-192   112    
16     16     
144    -192   
-208   -80    
96     0      
-16    -48    
-160   256    
-48    128    
224    160    
0      -128   
16     -656   
-576   80     
160    80     
-32    336    
432    -336   
-336   -544   
-256   -128   
224    -192   
-192   -608   
176    112    
160    112    
-96    -304   
-160   -128   
-16    -512   
32     -288   
336    -160   
-320   -256   
96     -576   
208    656    
192    368    
16     96     
-384   -160   
128    -208   
176    -96    
176    256    
-352   96     
64     -144   
-32    128    
-336   144    
352    -128   
-1712  320    
1712   -48    
-816   -96    
-944   176    
176    112    
224    112    
-1200  -96    
32     -336   
272    -128   
-320   -96    
-32    144    
80     -128   
-16    -16    
-352   -176   
32     48     
-176   -112   
-176   -80    
80     -160   
64     -16    
-176   112    
-160   -464   
960    624    
-656   16     
-32    -688   
-656   -592   
0      -320   
16     128    
0      400    
208    16     
224    160    
-1136  144    
448    -64    
240    48     
-96    0      
-176   -64    
-384   144    
304    -64    
-80    0      
-368   144    
112    0      
-16    64     
-656   0      
-304   -608   
-208   -64    
288    160    
-112   576    
-672   560    
480    672    
-528   864    
64     80     
32     -320   
-48    -256   
480    32     
-80    176    
-224   176    
576    352    
-528   384    
544    -464   
-288   -176   
192    96     
-240   -16    
240    80     
160    -48    
48     96     
-32    16     
-256   96     
176    16     
-80    -128   
-512   160    
64     432    
1216   2640   
-2048  1408   
432    -368   
1792   -336   
-912   256    
-544   -48    
640    320    
96     -112   
-128   400    
-144   -48    
-80    16     
240    16     
304    160    
16     -96    
-480   128    
400    -96    
-128   160    
368    -128   
-352   400    
208    -384   
-512   240    
1008   -48    
-496   240    
-976   -240   
400    208    
672    64     
-432   -16    
-368   -48    
208    96     
0      -16    
0      32     
16     -64    
-352   176    
320    16     
-32    224    
-528   48     
208    112    
416    80     
-112   32     
464    176    
-384   -16    
320    32     
-16    48     
0      0      
16     -96    
-112   -64    
208    -160   
-96    96     
-320   16     
96     80     
128    80     
96     -16    
192    160    
368    -640   
-240   -768   
-336   -224   
464    -256   
64     64     
48     448    
-560   176    
288    240    
-144   -144   
32     192    
-32    16     
-80    192    
192    16     
80     256    
-128   448    
400    16     
-64    -144   
-240   160    
96     96     
144    48     
-384   128    
96     160    
64     208    
160    -1168  
-400   -16    
80     480    
0      -496   
0      -304   
-752   -2336  
128    -32    
432    112    
-896   80     
928    272    
-224   -320   
-240   192    
-128   -288   
64     48     
400    256    
-608   368    
176    -192   
-112   304    
224    -336   
-256   256    
64     96     
0      96     
96     464    
96     -48    
-176   -144   
-208   -272   
16     -656   
-336   512    
880    -16    
-640   272    
-96    -128   
112    128    
528    560    
-480   336    
-48    16     
32     0      
16     -64    
256    48     
-208   176    
-16    16     
96     240    
-96    80     
-48    0      
-80    -160   
128    -16    
-96    32     
-240   64     
352    112    
-224   16     
160    288    
192    48     
-496   80     
352    -16    
64     96     
640    272    
-1664  896    
1024   816    
112    336    
-704   -272   
1424   368    
-1056  -256   
-32    -288   
432    272    
-48    -240   
48     144    
-160   128    
304    144    
80     48     
-128   0      
304    48     
-336   64     
-16    -240   
352    -272   
-352   -272   
64     176    
80     192    
-224   -1952  
-128   304    
624    -480   
-368   -640   
-128   48     
0      304    
256    -48    
-192   64     
272    0      
32     96     
144    144    
0      112    
-144   32     
80     272    
192    96     
-176   -208   
48     224    
192    160    
-144   112    
32     -16    
-16    64     
-32    -96    
352    0      
416    112    
-272   240    
160    -320   
464    -32    
-608   80     
-112   -320   
880    0      
-256   -272   
208    80     
-16    -2208  
640    -112   
-544   224    
704    -272   
-688   48     
-96    208    
304    -64    
176    64     
-240   -32    
-128   32     
16     16     
160    96     
640    880    
-848   864    
0      16     
32     -1040  
112    224    
-416   16     
384    1456   
656    -240   
-1120  -528   
720    368    
736    432    
208    -848   
-368   32     
-144   1632   
-80    -352   
352    464    
64     -608   
-96    -448   
0      400    
336    -480   
400    -16    
-128   1072   
-176   -656   
224    368    
128    -80    
0      400    
-240   304    
224    80     
-48    352    
80     368    
64     640    
192    464    
32     352    
64     -240   
48     16     
96     32     
0      -128   
-144   64     
224    224    
-48    -80    
-208   160    
112    -320   
160    1152   
528    880    
-272   -1056  
-144   240    
368    -528   
208    544    
-48    -224   
-64    160    
0      -144   
448    400    
32     240    
-272   -464   
32     144    
208    752    
-176   -416   
768    -1184  
-688   128    
48     288    
-304   -848   
80     -1184  
-128   -480   
544    272    
336    1104   
96     -320   
-176   -272   
-256   96     
208    16     
320    464    
160    160    
-144   272    
0      176    
-144   -16    
320    0      
-96    0      
-208   -336   
-16    -16    
176    -544   
-32    128    
-144   -528   
544    -432   
464    -368   
-32    -1296  
-384   80     
16     -672   
736    608    
-736   256    
480    -384   
-272   768    
144    -1344  
336    -608   
368    -96    
-96    304    
-80    -80    
640    -560   
224    -512   
-144   16     
-64    -336   
32     16     
-48    0      
176    -320   
-80    -112   
-144   -464   
224    -256   
144    -560   
-176   -432   
96     -1808  
-256   400    
304    -320   
160    0      
192    -400   
-432   0      
240    208    
272    224    
-80    -368   
-96    -320   
-496   320    
96     304    
0      -208   
32     -672   
-32    64     
-48    -208   
64     304    
176    -528   
-320   -112   
-240   -112   
144    144    
32     -64    
80     -256   
-320   0      
192    16     
-144   48     
16     -112   
-160   -208   
-32    -384   
816    80     
512    -608   
-512   -544   
832    256    
-608   48     
-16    -208   
656    -384   
-304   -320   
224    -96    
-368   176    
384    16     
-176   16     
-48    -32    
-80    272    
592    -48    
-352   96     
48     -432   
48     -224   
32     -272   
-32    160    
0      160    
32     928    
1296   -320   
-736   160    
304    -80    
160    16     
-336   80     
304    -272   
-736   64     
-96    64     
-1056  0      
320    -48    
112    96     
-48    -432   
-112   224    
272    -576   
-96    -144   
496    -176   
-176   0      
432    176    
-240   -16    
-240   0      
-96    64     
880    -480   
-320   304    
-416   592    
-320   80     
208    32     
1136   -352   
-208   432    
64     -592   
176    64     
384    -48    
-32    96     
-1024  96     
0      -176   
336    -240   
224    -64    
-512   96     
96     80     
-448   -16    
80     -192   
512    80     
-240   -176   
-800   112    
144    -464   
928    -272   
-352   -352   
-160   -64    
1008   1232   
-2624  1280   
48     880    
592    832    
304    -208   
336    -240   
-704   -144   
400    -544   
80     -192   
464    208    
-544   352    
112    224    
-400   -128   
-192   0      
48     0      
-432   208    
544    -48    
-192   0      
-96    -64    
-320   -272   
768    -1312  
-352   128    
96     -128   
-704   160    
-512   -112   
432    16     
-320   16     
-48    80     
-272   96     
-560   256    
160    0      
16     -144   
144    -96    
-64    -112   
400    48     
-1136  32     
912    32     
-352   -176   
112    -112   
112    -160   
-80    160    
-224   -64    
-176   32     
352    -64    
-112   -96    
-576   -32    
-416   16     
-48    128    
336    96     
-272   96     
-336   -208   
480    128    
-80    -160   
304    -224   
-1008  32     
768    96     
-224   208    
-80    176    
48     -272   
-400   -128   
208    -224   
96     32     
176    96     
-832   16     
16     208    
-144   -64    
96     -16    
-16    -240   
-32    -112   
-256   128    
-32    16     
304    -112   
-112   96     
-64    176    
160    0      
16     288    
-160   272    
-128   272    
16     -176   
208    544    
-288   560    
-528   -848   
1216   -464   
-1008  560    
224    128    
-368   64     
-336   -240   
448    112    
112    112    
256    208    
-704   512    
128    -288   
176    -160   
-288   -16    
-64    0      
0      64     
304    -192   
32     160    
176    160    
-368   48     
64     0      
128    80     
240    -544   
-800   752    
704    -544   
-384   -240   
112    320    
240    -32    
-288   368    
-320   128    
-176   192    
512    96     
-112   -224   
-352   -48    
96     144    
0      160    
80     544    
128    208    
-48    64     
-480   48     
176    16     
176    16     
-208   80     
-16    368    
0      240    
-384   -80    
144    96     
-176   96     
16     0      
112    80     
96     272    
-672   720    
800    464    
640    -224   
-560   -304   
176    144    
-272   -32    
112    -64    
304    -656   
-128   -160   
-176   -368   
-80    -32    
192    96     
-80    48     
-48    112    
-16    176    
336    288    
-112   176    
0      -144   
288    -16    
-32    32     
-64    -48    
48     304    
240    -640   
-1712  400    
1648   224    
-224   432    
-528   -224   
512    -864   
-704   -512   
416    256    
-128   -64    
16     144    
96     208    
-96    176    
-32    64     
-112   -432   
-80    -144   
80     112    
176    352    
-400   48     
-128   0      
-32    -48    
112    0      
48     48     
864    272    
160    -416   
-528   -432   
304    448    
-480   -16    
-224   -80    
224    -224   
128    144    
-80    -368   
-208   -128   
48     144    
-496   -512   
-48    -768   
240    112    
-464   -272   
80     -96    
208    224    
96     160    
0      80     
112    256    
-176   576    
-32    48     
112    -48    
-576   -128   
240    704    
256    464    
-304   208    
-560   -1360  
1744   -1632  
432    656    
352    592    
-1056  704    
160    -560   
-176   -1472  
480    -640   
192    992    
-544   -704   
-16    272    
144    240    
608    144    
112    144    
-272   32     
-288   -208   
544    -304   
32     -32    
-160   -656   
-416   -912   
64     -560   
480    752    
-64    -80    
-608   96     
688    128    
-160   432    
-128   -368   
-240   -1936  
-128   1056   
336    1744   
-144   -176   
368    144    
-96    368    
-32    1072   
480    848    
-32    -368   
-160   -672   
144    560    
-16    -224   
-144   -112   
224    -304   
-80    208    
192    -224   
-240   -16    
0      -368   
176    -64    
-32    576    
80     -480   
-16    48     
448    -128   
-384   -64    
80     -512   
-816   176    
672    -112   
80     -288   
-80    -112   
-240   32     
-160   -1424  
-224   -1616  
368    480    
-80    1120   
96     192    
144    144    
-208   128    
-16    -16    
48     576    
272    544    
16     496    
-384   -176   
-16    -32    
128    -96    
48     256    
160    -1184  
-432   -64    
192    -1648  
128    592    
48     864    
-128   -880   
-368   -448   
224    272    
224    32     
-400   1200   
768    -272   
-352   -528   
-576   -576   
48     -864   
160    624    
-496   224    
384    -224   
160    -624   
-48    16     
-96    0      
-112   160    
320    -240   
-16    496    
-96    -128   
-160   -192   
16     192    
288    160    
-64    160    
-112   48     
-272   -720   
384    -1248  
-176   480    
416    -240   
-176   -176   
112    -144   
16     -48    
-96    -16    
224    208    
-32    -112   
48     48     
-128   128    
80     0      
-96    224    
144    -128   
-416   -480   
160    -304   
48     528    
240    -304   
-80    48     
96     80     
192    80     
-176   160    
128    -32    
-240   240    
448    192    
-144   288    
160    16     
-176   256    
-736   -1952  
2464   512    
1376   -176   
-1872  320    
912    -304   
96     -32    
-176   -96    
32     -112   
208    176    
-464   -144   
-96    240    
320    128    
0      64     
32     -656   
-176   272    
528    -256   
-160   224    
432    -160   
-432   80     
32     -160   
48     112    
-32    -416   
-544   -304   
608    -512   
-144   -208   
-224   128    
16     -2736  
48     80     
336    -240   
-352   -80    
16     -192   
160    32     
-32    -96    
224    80     
-128   -96    
-192   64     
240    80     
128    -1424  
192    160    
-224   -256   
128    -160   
-432   -64    
-304   -336   
1040   192    
592    608    
-1456  -176   
-512   -1168  
640    -336   
256    -48    
-16    -80    
0      -80    
-640   352    
176    -144   
416    48     
-400   -224   
-64    240    
-128   -48    
208    432    
-112   32     
-368   -16    
-224   -160   
176    -1168  
752    208    
-160   -1328  
-496   -48    
496    16     
-128   -688   
-112   -288   
-128   368    
592    -160   
-48    -272   
1008   -3936  
-2720  -1104  
912    816    
560    240    
-112   96     
-832   -352   
464    32     
640    32     
-208   -304   
-304   -272   
784    -32    
-400   -32    
176    96     
96     112    
160    -128   
-240   80     
416    64     
-752   -112   
-352   -336   
1280   432    
-80    -208   
-464   256    
176    -784   
-672   32     
960    -800   
-656   0      
432    80     
-48    112    
-64    -144   
-144   -272   
384    -336   
-256   -240   
64     208    
-128   352    
-592   240    
-160   -384   
192    -192   
-80    -608   
-192   -224   
384    -816   
-16    128    
160    -16    
-192   96     
224    176    
-192   336    
-112   144    
128    -64    
-208   -64    
-48    -736   
-1568  -672   
256    -480   
80     -384   
448    -320   
-144   64     
176    -96    
320    112    
-192   -1136  
112    -96    
16     112    
32     48     
288    -80    
-208   64     
-48    64     
-144   -112   
-96    256    
288    -16    
208    -128   
-256   -384   
144    -96    
-80    -576   
-112   160    
96     -1632  
32     -336   
-256   -272   
80     -48    
32     320    
240    352    
-496   -80    
-32    -416   
-16    -192   
176    -112   
384    -1408  
-1232  1328   
1680   288    
-1072  -384   
352    -944   
112    -784   
-640   -48    
-160   336    
464    160    
64     48     
-320   320    
-240   416    
176    144    
256    -16    
-240   96     
-144   112    
176    -416   
32     -144   
144    -176   
-96    176    
-176   -464   
-608   -608   
32     768    
480    128    
-560   528    
528    -192   
-112   512    
192    -160   
-400   -176   
272    -48    
32     16     
-224   0      
176    -128   
-272   -144   
-16    80     
-144   0      
16     96     
-272   0      
-512   0      
-16    -64    
32     112    
-96    -192   
304    -192   
80     208    
-416   176    
-144   80     
-160   -272   
48     224    
-160   -256   
-224   -144   
1408   352    
-2560  176    
-320   -432   
1632   -928   
-1152  -448   
-768   96     
832    192    
-576   368    
-384   -1088  
528    -256   
-112   656    
-352   -96    
208    192    
112    -16    
-480   160    
64     144    
0      0      
-48    96     
-16    -48    
-80    -80    
-416   80     
-608   352    
1504   -448   
-1424  -112   
-560   -304   
1200   1232   
-272   1184   
-240   1200   
208    816    
80     48     
-224   -432   
448    -96    
-16    -16    
-64    32     
-176   448    
272    256    
64     -96    
-464   96     
688    1296   
-432   1344   
-16    416    
384    32     
128    -48    
-368   160    
576    -160   
-624   -1472  
-64    -688   
960    784    
-240   -16    
-32    368    
80     608    
-240   432    
-80    -448   
-288   112    
400    -80    
-560   -64    
336    224    
384    128    
-320   1600   
960    176    
-512   -64    
80     368    
64     288    
144    768    
336    64     
-272   -160   
0      64     
-80    -160   
32     -336   
-176   80     
0      176    
-448   1776   
1520   -176   
-1360  -608   
-960   -720   
960    -288   
-112   -1072  
-272   -624   
-752   320    
-48    -16    
96     688    
128    -288   
-496   448    
224    0      
-48    -336   
432    -48    
32     -400   
-96    -112   
272    496    
192    896    
-208   48     
16     -288   
144    272    
-144   -560   
-624   144    
896    384    
-384   752    
544    1040   
-256   768    
32     -528   
-192   -64    
48     -112   
128    -80    
48     800    
-112   688    
-48    464    
128    16     
-384   192    
-96    816    
176    640    
-224   848    
400    1104   
-160   80     
-144   -688   
80     -416   
-16    1200   
352    -32    
-576   -16    
208    576    
-192   -512   
112    -416   
96     384    
-112   -80    
-448   384    
48     592    
1968   -848   
-688   544    
-32    -704   
-112   -80    
160    272    
256    752    
-96    480    
0      256    
80     656    
336    560    
112    -272   
-144   -544   
48     32     
16     -304   
-80    -144   
256    -752   
224    -272   
-160   144    
-128   96     
96     32     
240    160    
-352   -80    
80     -560   
-16    -256   
96     96     
0      -64    
432    -160   
-1936  1984   
1168   -144   
-160   -16    
128    384    
-160   384    
-16    64     
-80    416    
400    -304   
0      16     
192    -336   
-96    304    
32     160    
-80    576    
48     -288   
48     96     
240    400    
-320   -48    
96     144    
-32    -160   
800    576    
-1296  640    
704    -128   
-224   -192   
-336   112    
560    0      
-384   224    
64     -176   
-272   32     
624    -64    
-176   176    
-416   192    
208    176    
272    0      
-80    48     
-64    16     
-144   176    
112    -416   
496    -48    
-368   160    
160    160    
-368   144    
320    160    
-224   -80    
272    64     
-160   -128   
-48    144    
-80    128    
176    96     
288    64     
-848   1760   
2112   1216   
-1120  -1856  
-448   -288   
528    208    
240    144    
-272   16     
288    160    
-80    -96    
-272   208    
48     64     
80     144    
-32    -368   
-80    176    
320    96     
-176   16     
32     80     
160    -400   
-64    16     
32     128    
16     144    
-464   -432   
0      256    
864    -464   
-768   -512   
-464   688    
416    272    
160    -240   
-176   -80    
-224   80     
80     -32    
480    112    
-80    -272   
-144   48     
-112   -1120  
-192   128    
464    -96    
112    256    
160    320    
-480   -416   
272    112    
160    -48    
288    0      
-256   96     
560    192    
-720   -480   
32     176    
688    208    
-80    -192   
560    -144   
-432   304    
-112   -64    
944    -352   
-192   224    
-272   128    
-352   -192   
720    -528   
384    -224   
-176   48     
-672   160    
400    32     
64     -16    
64     -192   
240    144    
-144   -464   
0      96     
16     -672   
-288   160    
256    80     
-128   -464   
928    -4160  
-2800  -1712  
1264   640    
448    176    
-288   144    
416    -80    
-128   304    
-448   80     
592    -48    
-224   -160   
400    -32    
-192   80     
0      80     
16     -32    
-80    144    
256    -48    
-64    80     
272    48     
-176   -720   
528    -544   
-192   -496   
224    96     
-176   -208   
-624   -128   
96     -288   
576    176    
-128   -432   
-48    32     
-32    -144   
304    -64    
32     -16    
0      224    
0      400    
512    144    
-560   -16    
-128   -384   
368    -96    
272    48     
-224   256    
-32    0      
272    288    
80     16     
144    400    
128    304    
-400   400    
128    96     
16     -1792  
48     -592   
-224   -416   
48     -704   
384    256    
208    912    
-784   384    
448    -448   
-576   -960   
272    -1376  
-128   -688   
-160   32     
96     256    
48     352    
-176   272    
-64    528    
-400   -480   
-176   32     
480    -720   
16     -64    
-144   -1344  
-176   -320   
224    -96    
-48    160    
144    64     
-16    -160   
128    -240   
-160   64     
-48    -16    
16     192    
192    576    
0      528    
-16    -496   
96     -176   
64     -112   
-640   -1792  
400    -1088  
-480   -736   
-112   128    
560    304    
-272   -560   
-64    -32    
96     128    
48     -112   
0      80     
64     -16    
-160   48     
-336   -224   
128    208    
16     80     
16     -16    
-144   -288   
128    80     
32     -112   
0      272    
656    272    
-1232  720    
880    -256   
144    608    
-16    192    
-368   -32    
-160   -640   
-816   -176   
48     736    
16     208    
176    -320   
-192   -288   
176    -720   
-32    -16    
304    -528   
16     160    
-128   -16    
-256   112    
240    224    
-16    0      
-176   -80    
-128   -16    
-96    -176   
448    16     
-352   -80    
-512   288    
304    -128   
240    -672   
128    32     
-176   -304   
-608   -1056  
-928   448    
1040   -240   
-1520  -304   
352    -32    
112    96     
-528   -112   
320    -1248  
368    16     
-256   944    
0      640    
-480   -272   
-112   -432   
160    112    
160    -208   
16     32     
-128   -160   
256    176    
176    -544   
-96    304    
-384   -416   
1312   -32    
-1840  -112   
1056   -384   
-816   208    
160    880    
208    656    
416    1248   
64     896    
-464   -1344  
288    -560   
-144   -2800  
-128   -160   
208    -704   
-400   -320   
80     -32    
352    -208   
-720   -1280  
-240   -1392  
-48    -896   
144    128    
96     32     
240    432    
-288   160    
272    -624   
-496   48     
352    992    
768    608    
-416   592    
208    384    
416    512    
-16    -256   
-192   176    
16     -112   
256    480    
112    -48    
-144   -160   
32     -368   
160    288    
656    176    
-384   -80    
112    272    
-464   -192   
480    16     
-80    -112   
-448   -352   
176    -224   
-272   -32    
288    -528   
-176   -272   
-400   288    
240    -480   
-192   -96    
464    16     
-784   32     
-224   368    
80     304    
352    -144   
-368   64     
-176   672    
-256   -272   
128    -352   
112    112    
-192   592    
-240   64     
96     -128   
-32    -112   
-112   -176   
64     -208   
-80    -256   
144    224    
96     192    
-448   16     
-704   -288   
1312   -64    
-448   -272   
-224   -208   
-224   -80    
80     -192   
400    -464   
-416   -480   
336    64     
-256   -208   
176    192    
-384   -16    
-80    272    
288    320    
-16    -80    
-32    -176   
-128   -176   
192    -464   
-272   -512   
-80    -64    
-96    384    
-128   240    
256    -176   
-416   -272   
256    -928   
-96    -224   
-32    -144   
80     256    
64     64     
-288   -752   
-256   -656   
-144   48     
-80    -32    
192    1024   
480    128    
-48    -448   
-176   -16    
-160   -160   
560    -144   
-208   -208   
-496   -112   
176    64     
96     -16    
32     -80    
112    -144   
-80    560    
-240   16     
128    -224   
224    16     
-176   208    
-416   -160   
64     16     
16     -96    
496    64     
-64    320    
-400   112    
144    16     
128    -16    
208    -2256  
-2032  1312   
1776   80     
-720   272    
816    128    
-464   -48    
-144   128    
-128   352    
-272   -112   
48     16     
-96    304    
-352   -48    
64     96     
224    128    
-64    240    
208    -64    
-688   336    
368    -176   
32     144    
0      -144   
64     800    
-656   -384   
-176   336    
1184   320    
-656   -128   
-256   144    
96     -240   
-80    208    
368    -192   
-400   128    
224    160    
-384   0      
144    112    
416    -80    
-432   -96    
0      -48    
-176   224    
16     0      
-432   288    
560    -176   
-448   64     
-176   16     
0      112    
128    -32    
240    48     
32     16     
-176   176    
192    -32    
-368   0      
0      -592   
1120   2224   
-112   -208   
-1008  -16    
544    -16    
-896   0      
944    160    
144    -32    
-64    112    
384    -80    
-560   192    
352    112    
0      48     
160    64     
-192   -64    
128    144    
0      -32    
-112   128    
96     0      
208    80     
-112   96     
-48    144    
-368   -560   
400    -112   
-416   0      
-272   320    
1296   400    
-912   160    
64     64     
80     224    
512    32     
-320   -16    
-48    112    
240    16     
-80    144    
96     80     
-272   16     
160    16     
96     320    
-64    240    
160    0      
-48    32     
-32    16     
-16    400    
832    -528   
-784   272    
576    -48    
96     432    
-48    592    
-1104  224    
-48    112    
528    -192   
-64    128    
-128   208    
48     80     
384    176    
-352   256    
-192   -112   
-96    0      
160    464    
672    -96    
-528   32     
-80    96     
96     112    
112    48     
0      96     
192    256    
-384   416    
432    16     
112    64     
-512   -352   
2736   2192   
-2528  2000   
304    -800   
1536   -272   
-640   272    
-352   -144   
0      48     
992    320    
48     -720   
-544   112    
448    64     
-160   64     
256    48     
256    192    
-288   -16    
-80    352    
416    -16    
-64    192    
-272   -64    
-64    1280   
832    1584   
-352   1120   
176    80     
80     -2144  
-528   -112   
608    816    
336    64     
-640   -64    
96     32     
464    80     
128    -48    
-720   -224   
224    128    
832    -160   
-784   -16    
112    -160   
144    -80    
176    -224   
144    -528   
80     48     
-224   32     
96     -80    
320    -256   
-224   -336   
192    -128   
240    -448   
-368   -672   
0      -48    
-320   -192   
208    -304   
448    -384   
-384   -848   
112    -336   
-656   -16    
672    352    
112    -1392  
-400   528    
0      656    
224    800    
176    -368   
-224   -1152  
-16    224    
144    720    
-240   320    
304    480    
64     144    
-224   -192   
64     320    
-224   128    
256    272    
144    -224   
-208   48     
-16    16     
-16    96     
240    -144   
-224   -176   
-48    -48    
48     -416   
-256   -112   
-240   -192   
272    176    
-240   -528   
864    -896   
-368   480    
272    -64    
128    -864   
-48    176    
-32    -80    
160    256    
-160   112    
-16    112    
-64    -80    
64     144    
160    176    
128    -64    
-48    48     
144    32     
-32    288    
224    -768   
-16    -32    
-128   -352   
256    720    
-96    96     
48     32     
496    -496   
-176   -176   
-304   368    
-80    -96    
704    160    
416    192    
-656   288    
-128   -400   
512    -80    
-16    -544   
96     144    
-96    -160   
-32    144    
-16    -848   
160    144    
48     -80    
-16    64     
176    160    
64     336    
80     192    
-80    -160   
-192   -368   
48     -128   
336    -96    
-80    160    
688    592    
-528   592    
1648   1152   
-2320  -32    
-1120  -656   
2128   -160   
-960   16     
-144   608    
80     160    
48     736    
832    1072   
-144   -2176  
-80    -864   
-64    496    
48     -400   
336    32     
-208   -400   
-160   -1232  
32     128    
176    -736   
16     336    
-16    -352   
-160   112    
-176   320    
1472   -224   
-1552  464    
816    -992   
96     -1424  
-336   -1216  
-352   -496   
736    -704   
-432   -1136  
-16    -224   
512    192    
-224   208    
-32    480    
336    -128   
-112   -192   
-176   -32    
96     -192   
-432   -48    
288    96     
-80    -96    
0      -192   
256    -336   
208    -1056  
272    496    
-1424  800    
448    224    
-240   0      
160    -464   
144    -64    
-16    -528   
-240   160    
384    -208   
-1136  160    
80     -256   
-272   -16    
176    304    
800    128    
-672   -496   
448    -192   
-96    48     
192    0      
112    -96    
-160   -208   
-256   96     
432    32     
-112   -64    
-224   -80    
-816   -544   
928    -656   
944    2096   
-736   976    
928    -160   
1040   -480   
-1376  64     
-144   352    
704    192    
-240   -32    
-112   224    
160    304    
-192   560    
64     -144   
416    -48    
-512   -192   
-144   320    
16     -144   
0      96     
0      -240   
0      528    
368    1136   
-160   432    
448    560    
-176   -304   
-16    96     
400    112    
-224   -304   
144    -336   
-16    -288   
112    480    
288    352    
-1296  64     
544    -144   
-944   240    
304    -112   
-256   0      
32     -480   
416    80     
240    -48    
-80    112    
0      80     
208    80     
-160   -48    
176    112    
0      -144   
-624   -208   
144    -128   
464    -48    
-96    128    
-224   0      
112    -144   
-16    -400   
160    144    
-752   -512   
160    -336   
368    272    
48     -320   
48     -272   
16     64     
-64    192    
64     -128   
-256   0      
80     -48    
144    16     
-240   -224   
32     -32    
256    -224   
80     -256   
-560   112    
208    112    
192    -192   
0      128    
-112   -64    
32     -32    
-48    -32    
32     32     
0      144    
192    -96    
-352   64     
48     -256   
112    64     
-560   -192   
-1088  -1040  
1424   -416   
160    -240   
-1312  -320   
1232   -528   
-720   128    
144    272    
-480   272    
336    -176   
-112   64     
-928   -144   
-80    80     
-128   16     
0      -416   
160    -144   
-368   144    
-160   224    
-80    -96    
-32    48     
-368   -112   
704    1504   
-1328  -32    
256    -80    
1040   -336   
-848   48     
128    -64    
128    208    
-16    144    
-112   32     
0      144    
16     -16    
-512   32     
64     0      
80     -16    
-288   224    
560    176    
-976   176    
-192   320    
-192   -272   
320    80     
-256   -128   
-112   240    
-144   -128   
-96    96     
560    -32    
-592   48     
240    208    
-48    48     
-144   64     
-144   -1104  
1936   -2112  
-2784  704    
944    -448   
352    240    
-480   160    
-128   -304   
352    272    
432    -112   
-816   16     
32     48     
80     112    
304    48     
-64    32     
-128   144    
128    32     
-144   80     
176    -96    
-176   336    
-160   208    
208    192    
-240   16     
-448   224    
1456   -640   
-544   -208   
64     -32    
-32    240    
-192   32     
464    480    
-720   176    
-336   -208   
352    128    
32     -112   
-64    128    
-512   -192   
208    0      
-256   0      
384    0      
-128   256    
320    496    
208    -128   
-272   -80    
192    256    
-144   0      
-304   160    
960    16     
-352   144    
-288   -464   
-448   432    
480    -208   
-192   -32    
128    96     
336    32     
-96    64     
-272   64     
416    16     
96     112    
-128   -32    
-560   -208   
832    176    
-336   16     
-448   96     
288    -32    
48     32     
16     160    
-320   176    
-160   -256   
-128   -32    
-144   144    
-48    -32    
480    1040   
1696   2448   
-2880  1952   
1952   16     
1264   -416   
-1680  -80    
-16    224    
32     16     
400    16     
96     304    
-208   96     
-480   -48    
192    176    
176    0      
128    304    
-400   16     
240    240    
176    0      
-176   96     
-96    -208   
256    -176   
-96    496    
224    608    
-144   208    
-576   -176   
320    -1040  
16     288    
368    -16    
-384   -240   
112    -688   
96     -80    
80     768    
96     -352   
-80    -560   
-112   48     
48     496    
336    320    
-560   -560   
32     -848   
352    -576   
-64    816    
16     144    
16     -96    
288    0      
-176   192    
144    736    
256    -432   
-688   -1104  
528    -288   
64     1136   
-176   368    
48     32     
112    528    
-480   96     
-160   96     
512    800    
-432   1056   
224    704    
-16    -272   
-160   176    
192    240    
-176   16     
-16    -240   
96     160    
-32    288    
-64    -256   
-96    320    
-16    560    
-32    32     
-240   -32    
128    32     
80     16     
-64    96     
144    96     
-208   80     
80     336    
128    16     
-32    64     
144    64     
-416   224    
112    112    
-16    160    
-288   -64    
656    -336   
-528   256    
944    -224   
-448   224    
-80    272    
48     -480   
336    -128   
-352   400    
64     112    
-336   16     
192    80     
208    128    
208    144    
-544   176    
272    -464   
384    -320   
-160   320    
0      -16    
-176   32     
624    -96    
-1408  192    
848    -80    
-144   160    
16     -176   
64     0      
-128   -128   
288    -304   
240    -48    
400    0      
-224   64     
-432   16     
400    -16    
128    -1040  
-256   144    
-80    48     
304    -176   
208    80     
208    96     
176    -192   
-128   272    
384    32     
-128   272    
48     -96    
-256   -272   
144    320    
160    112    
112    224    
-576   -624   
0      -80    
-1488  -320   
1520   80     
-112   -304   
-784   -48    
576    224    
544    -224   
-496   -864   
624    256    
-160   1648   
128    1328   
192    -352   
-288   -672   
-176   384    
432    -800   
0      128    
16     -2656  
-112   96     
80     672    
160    720    
64     240    
-320   -592   
1088   96     
-1376  -64    
752    -528   
320    -336   
-304   720    
16     1264   
-144   1072   
608    -208   
-464   -256   
128    144    
112    112    
144    592    
-224   176    
-64    160    
464    -48    
-320   112    
160    0      
-496   288    
144    -224   
48     32     
112    -416   
336    -288   
304    -128   
80     960    
-752   -880   
16     -128   
176    -752   
-80    80     
432    576    
-1024  336    
240    -240   
176    112    
-64    32     
-112   -80    
-224   448    
960    416    
-592   208    
-416   -624   
64     272    
-144   -48    
80     112    
336    -176   
-656   -272   
128    144    
208    240    
-112   -176   
32     128    
-224   64     
-512   -880   
2128   -784   
-2592  -768   
688    512    
880    -352   
-16    144    
-608   -160   
-32    64     
688    -336   
224    -112   
-256   80     
176    -16    
64     336    
-32    -144   
528    208    
-32    -240   
-96    256    
-96    -192   
288    112    
-304   -464   
896    -176   
-592   0      
256    272    
-320   -448   
208    -336   
592    -144   
-224   -1408  
176    256    
16     224    
208    -624   
48     -432   
80     -1056  
96     -336   
-128   176    
-240   -240   
-32    48     
432    -80    
-192   -16    
-416   -560   
-512   -1120  
560    96     
-48    -96    
240    -352   
-816   -128   
-256   -304   
432    -48    
-144   -256   
304    -192   
-576   -800   
160    -224   
288    -240   
-448   -224   
320    0      
144    688    
784    48     
-592   -32    
736    -176   
-416   112    
64     464    
864    80     
-160   96     
32     -48    
-224   -112   
240    -192   
32     -288   
176    -1296  
128    80     
0      224    
32     128    
48     32     
208    336    
96     64     
-336   80     
-48    144    
192    -32    
-1008  32     
160    -112   
0      16     
0      -400   
64     -32    
128    -448   
128    112    
-992   -1840  
992    -752   
-208   -368   
-848   176    
848    32     
-288   80     
208    -48    
-304   688    
368    -80    
-112   -464   
96     192    
-16    -96    
-496   208    
400    -528   
-256   256    
368    -2240  
-272   240    
192    48     
160    64     
-32    16     
704    1088   
-1504  -352   
224    -32    
944    -192   
-656   -336   
-416   112    
-16    112    
48     -16    
448    -880   
-64    -16    
-272   -672   
16     192    
224    -48    
128    -16    
-128   304    
112    -48    
-320   0      
480    144    
-320   -128   
32     288    
112    16     
-80    -112   
32     0      
128    -256   
-176   -16    
400    -224   
-80    -16    
-128   80     
176    -32    
-432   -224   
-208   -880   
1168   816    
-240   288    
-672   -128   
656    48     
-560   -112   
-144   400    
480    32     
-128   -192   
-256   0      
320    -464   
224    64     
-160   16     
-224   -288   
-144   -16    
304    -64    
-288   80     
224    -96    
-144   -352   
112    -224   
-464   -16    
-32    -832   
-480   768    
912    -464   
-864   -384   
80     -128   
240    -112   
-160   -144   
-368   400    
-240   160    
336    -112   
16     96     
64     -160   
-272   144    
48     96     
-16    -32    
-64    64     
32     240    
-480   -512   
-160   352    
-928   -112   
-240   -384   
976    -80    
-1232  720    
208    -432   
-160   112    
-496   224    
-96    -128   
336    -16    
208    32     
-160   64     
-512   -144   
208    80     
-192   16     
-48    176    
144    -128   
800    32     
-528   160    
-304   240    
208    -192   
-1280  272    
176    -16    
-176   64     
160    80     
160    -96    
-64    336    
-288   -432   
-368   0      
464    -80    
336    -400   
-1264  -1392  
1568   -2384  
192    352    
-592   672    
-80    320    
336    48     
192    944    
64     1536   
-96    944    
144    -32    
-432   -80    
240    160    
-48    352    
112    -368   
80     304    
240    352    
-704   -160   
128    144    
256    -272   
-16    0      
-176   -464   
-224   -320   
176    144    
-208   -336   
-256   -480   
272    928    
80     1488   
48     992    
64     -224   
-160   -256   
96     -160   
0      -128   
-32    320    
272    640    
-64    288    
-48    384    
64     624    
176    800    
-272   224    
-496   -368   
352    144    
-192   -144   
112    208    
-112   224    
-32    -544   
384    -880   
-240   304    
112    -112   
-544   -528   
208    48     
-256   16     
-192   -672   
608    -144   
-704   528    
256    752    
96     720    
0      448    
-144   -576   
-224   -1200  
240    560    
96     928    
48     336    
-176   -64    
-256   -96    
112    96     
0      112    
-256   432    
80     208    
-32    400    
-464   96     
464    -32    
-480   128    
432    -16    
-320   144    
192    0      
-32    112    
192    -48    
-240   96     
80     -64    
320    -144   
32     64     
-192   -256   
32     -128   
96     400    
272    -288   
-384   496    
-256   -160   
224    -160   
528    -48    
-224   208    
16     176    
-80    80     
384    32     
-48    288    
80     112    
-112   48     
208    288    
-96    432    
32     128    
32     -208   
16     -304   
592    448    
-784   592    
368    -432   
432    -128   
64     144    
-208   224    
-336   0      
288    -848   
416    -240   
-160   -128   
-160   112    
-32    16     
-80    -48    
64     80     
96     48     
-48    448    
-384   -400   
128    -640   
432    768    
432    544    
-768   -640   
-304   112    
400    128    
96     176    
-112   160    
-208   176    
320    -208   
128    -32    
208    0      
-368   208    
288    -448   
-2528  0      
1296   432    
704    1120   
-944   64     
64     976    
1072   -256   
-1392  224    
336    960    
528    176    
-272   -96    
-128   -224   
48     80     
-64    208    
192    352    
48     224    
-64    0      
-32    320    
64     240    
48     80     
-208   208    
-32    976    
1968   -64    
-1280  192    
368    64     
96     64     
-512   -384   
448    -16    
16     304    
-128   -144   
144    192    
176    -32    
48     96     
-80    -16    
-448   112    
496    80     
48     128    
-224   -144   
-272   256    
112    48     
0      -48    
144    -144   
720    -176   
-416   512    
112    -176   
112    -256   
48     -48    
-176   288    
400    336    
240    128    
-336   -80    
16     16     
16     -112   
112    256    
304    -16    
288    208    
-128   64     
-80    -608   
-304   208    
-16    -288   
288    -128   
288    160    
-224   160    
-32    112    
288    80     
480    192    
-1456  224    
480    64     
48     64     
624    1936   
384    3568   
-1264  1760   
1248   -656   
640    -288   
-608   -2048  
-704   464    
592    112    
176    -16    
96     -96    
-112   -80    
-256   160    
160    -16    
144    -96    
-48    32     
-16    -80    
256    64     
96     144    
-368   -240   
208    128    
48     112    
832    176    
-1008  224    
720    144    
-352   -48    
48     112    
-592   -16    
688    240    
-688   -240   
192    336    
80     -160   
-304   160    
192    32     
80     176    
-240   64     
-16    192    
784    112    
-416   -1440  
-16    -64    
304    64     
112    208    
-144   32     
224    64     
-256   -112   
368    -80    
-544   -16    
-320   -32    
256    352    
128    160    
0      320    
32     -208   
-176   144    
144    -832   
432    368    
544    -496   
-544   304    
272    32     
48     128    
-32    384    
-272   608    
288    320    
-256   -128   
208    128    
224    -256   
-576   192    
112    256    
400    112    
192    -1024  
-800   448    
176    -496   
416    -800   
-272   288    
192    112    
-224   -64    
0      64     
240    288    
192    -32    
-320   16     
0      -336   
192    736    
320    80     
-96    -112   
-528   -2592  
-560   1232   
1408   96     
-1104  688    
1280   -112   
-352   -32    
-208   320    
-416   -384   
304    400    
352    -64    
-240   160    
-160   -128   
-32    160    
576    16     
-608   832    
320    -608   
-256   32     
496    -432   
32     304    
-256   -64    
208    192    
-400   -528   
-256   304    
1056   64     
-240   -16    
-256   112    
-32    0      
272    112    
0      -464   
64     -64    
-144   112    
144    256    
64     112    
112    -2688  
32     192    
16     -1536  
-64    80     
432    -224   
-240   -512   
128    -128   
-160   -1664  
112    -64    
128    160    
48     32     
-96    64     
240    64     
-144   -1040  
-96    144    
288    -80    
608    288    
-1568  1408   
1488   528    
-384   256    
-352   -560   
1072   64     
-512   -192   
-496   -432   
656    -864   
-96    -336   
-48    224    
-96    -192   
304    -640   
-320   -96    
144    -416   
-48    144    
-48    -272   
48     -176   
-368   -192   
224    -144   
-208   -192   
160    80     
-256   -1056  
240    192    
752    -192   
-1728  -768   
448    144    
272    -624   
-656   304    
416    -96    
-528   -256   
400    -272   
160    -48    
-320   80     
32     112    
-304   -48    
160    -112   
-256   80     
96     -592   
-464   -16    
160    -144   
336    400    
304    80     
-304   -160   
448    -736   
-480   720    
320    -208   
-448   -352   
-752   640    
416    -32    
-496   -352   
160    -208   
144    -288   
-272   -144   
144    -32    
240    -368   
608    432    
-544   -1104  
336    -16    
272    80     
-64    -336   
48     -96    
-144   80     
0      48     
256    -160   
-368   80     
-432   -16    
32     224    
368    -112   
-464   -368   
192    -624   
-96    160    
-1184  320    
624    176    
80     -336   
-896   544    
1040   624    
32     -640   
-800   -1712  
-112   -576   
160    368    
240    -352   
-368   -176   
-368   64     
-32    288    
272    -160   
64     32     
-96    -320   
32     288    
48     144    
-48    304    
32     144    
128    -512   
-352   -544   
0      -336   
-16    336    
256    96     
-528   -768   
-48    -1408  
176    768    
-224   304    
-112   -320   
-160   -512   
96     32     
176    96     
-144   -96    
-64    32     
432    896    
-256   -448   
-64    -384   
-208   592    
160    -32    
-768   -32    
352    -720   
-384   80     
-32    -320   
0      96     
272    -112   
16     128    
-656   64     
128    -624   
208    208    
-96    -432   
640    16     
-512   368    
0      -160   
-96    -912   
-160   -320   
-64    -416   
-496   -736   
96     448    
192    288    
-256   -208   
-288   160    
-48    -32    
-336   -176   
-64    -96    
240    -224   
-480   224    
176    1120   
-80    128    
384    -720   
96     192    
-176   112    
-288   32     
-48    -336   
400    544    
80     544    
-112   736    
-48    1248   
-16    176    
656    -352   
-992   -224   
592    -1104  
352    272    
-32    752    
-160   1040   
176    608    
-256   -640   
-16    64     
80     80     
-288   480    
48     384    
-96    176    
-64    384    
208    160    
80     112    
-240   320    
-336   384    
-336   336    
224    128    
-112   -208   
-208   480    
128    -512   
-256   448    
640    -736   
-304   -432   
-80    -272   
176    64     
-464   512    
192    -64    
-48    -560   
-96    640    
0      -224   
128    160    
-272   224    
-400   -352   
352    64     
176    -208   
16     -272   
-96    -112   
304    304    
-416   256    
-160   112    
176    192    
-48    32     
368    16     
-464   -112   
80     144    
16     16     
-64    160    
-1344  -32    
2304   848    
-1760  656    
-432   400    
1056   224    
-592   -80    
64     -48    
-256   -96    
-48    112    
128    112    
144    240    
-272   -176   
224    96     
-208   -32    
64     -48    
-528   -16    
272    80     
-128   -128   
144    240    
160    96     
160    128    
-96    48     
128    -400   
-1200  832    
1296   -16    
-848   -16    
496    -96    
-32    112    
-368   32     
112    544    
-528   -32    
144    -16    
-64    16     
-240   48     
112    144    
16     -128   
160    288    
432    -112   
-480   -112   
400    -176   
192    -160   
128    160    
32     144    
-256   400    
192    -80    
-144   160    
560    64     
-256   288    
-112   256    
256    208    
-128   -32    
256    -80    
32     128    
-480   64     
48     -80    
544    -80    
-224   -64    
-64    752    
-208   592    
0      -32    
480    -192   
160    -80    
-240   -48    
-80    -32    
272    176    
112    48     
544    432    
-704   96     
-416   48     
752    -16    
-16    -464   
16     720    
1344   -1344  
144    1280   
384    640    
-816   -288   
352    752    
464    288    
-304   -32    
192    -176   
-160   -48    
112    192    
-128   336    
48     -320   
-112   208    
160    32     
32     96     
-208   48     
-80    112    
464    128    
-592   -640   
-128   48     
16     0      
-336   64     
1024   -48    
-16    -64    
-560   -96    
256    224    
0      -320   
112    -96    
240    -224   
-112   192    
176    64     
-272   288    
240    128    
-64    192    
304    32     
144    64     
96     192    
-144   144    
-384   64     
272    176    
16     0      
96     0      
-208   16     
128    80     
-128   48     
240    80     
48     32     
-144   -112   
48     48     
-128   80     
144    48     
48     -752   
-432   -32    
16     -32    
336    -464   
240    -80    
0      208    
-304   208    
-32    192    
0      -208   
-16    160    
-64    -80    
-64    -176   
128    304    
192    48     
-144   0      
208    0      
-224   -32    
176    -592   
32     80     
-48    352    
32     112    
-112   -160   
80     48     
64     128    
96     -144   
16     -144   
-64    -1184  
80     304    
176    192    
720    112    
-2256  1696   
1920   -240   
-288   336    
576    -656   
-480   112    
160    992    
-400   624    
288    -112   
240    -288   
-192   256    
-96    48     
224    -528   
-32    0      
96     -3248  
16     208    
192    224    
0      240    
224    304    
-224   -304   
-32    352    
560    1680   
80     80     
-816   304    
1168   -320   
-688   704    
208    192    
192    0      
32     320    
-272   -288   
64     112    
624    384    
-368   400    
0      176    
-240   160    
432    -32    
32     176    
-304   -48    
128    272    
112    -144   
112    -128   
160    160    
-48    -160   
-64    208    
192    -48    
96     -48    
-272   -2656  
112    176    
0      -384   
160    -480   
816    -64    
-992   1440   
-320   -304   
688    -80    
-784   -128   
304    80     
272    32     
0      -48    
-96    128    
144    -304   
96     -256   
-192   -704   
32     144    
304    656    
-320   160    
-16    80     
256    32     
-272   -496   
-224   -368   
0      -256   
-32    -144   
352    -368   
-1856  512    
1984   880    
-912   256    
-848   -672   
720    -832   
640    400    
-256   288    
-224   192    
560    -32    
-112   224    
-160   192    
96     224    
16     240    
-32    -320   
-32    176    
400    352    
-464   1040   
80     784    
384    752    
-352   80     
192    320    
-352   592    
672    944    
-592   560    
320    1360   
512    192    
48     -1152  
48     -128   
112    96     
-384   256    
240    448    
-80    432    
-80    608    
928    0      
80     -368   
-32    832    
128    752    
-704   -48    
336    192    
-112   -1920  
-336   -144   
176    -16    
336    -144   
48     -320   
-192   -400   
-16    -544   
-192   128    
-80    192    
192    256    
176    -2032  
-2064  -1360  
1104   0      
48     -96    
48     176    
272    224    
-192   672    
336    1344   
288    -1392  
-192   272    
16     -944   
-256   -576   
64     32     
112    -336   
-80    0      
-240   400    
-32    -800   
-288   64     
352    -1088  
-64    -432   
-304   -512   
48     96     
96     16     
-16    -368   
-192   -432   
-224   -80    
-32    -144   
384    -160   
368    336    
-208   144    
-32    -544   
64     -160   
96     -64    
-112   -256   
128    448    
-240   48     
-160   -1040  
80     -272   
-480   -656   
256    -672   
336    -240   
-176   0      
-96    -720   
128    672    
400    320    
-32    128    
-128   -592   
320    -592   
192    912    
-224   -384   
-272   -384   
176    624    
640    752    
-352   848    
-672   896    
80     432    
144    -144   
320    224    
-112   -112   
80     -2144  
-256   256    
224    1008   
160    -48    
-160   -352   
144    -96    
-16    352    
16     272    
-144   -432   
176    -416   
-992   -544   
-112   224    
368    -64    
-224   112    
16     176    
144    -1040  
-272   -784   
192    -1504  
16     -96    
-496   144    
-80    112    
16     -256   
672    -1584  
-656   912    
640    -832   
-528   -320   
16     -464   
-416   -656   
336    128    
-144   16     
-288   -864   
240    -336   
96     -1360  
112    416    
48     368    
-192   608    
128    80     
-288   128    
-176   -48    
64     -128   
-160   80     
-16    64     
-640   -1040  
592    -208   
-160   512    
-64    -64    
432    640    
-592   -144   
368    448    
-464   496    
80     112    
-288   -256   
224    -48    
0      -272   
-96    80     
96     128    
176    144    
-512   -176   
-32    -368   
-80    112    
304    -16    
-112   80     
-96    -224   
336    48     
-272   -32    
528    64     
-416   -32    
-192   192    
144    48     
112    112    
32     128    
1504   1680   
-1760  -720   
-2496  64     
2704   96     
-576   -256   
-784   32     
-160   -480   
-16    144    
-256   -176   
-128   -32    
464    16     
-384   16     
-128   32     
176    -192   
-336   -48    
288    -192   
-224   32     
160    -96    
448    64     
-304   -192   
-64    32     
80     -288   
864    -128   
-1456  192    
1264   -384   
-640   224    
240    -352   
-80    -224   
32     -176   
112    -128   
-560   -144   
-240   176    
-96    -64    
160    192    
-176   -224   
-48    96     
-48    112    
80     96     
-320   400    
80     368    
400    -272   
-368   -192   
-304   -112   
-208   224    
464    384    
-1488  -176   
-112   -48    
208    -656   
-1104  -48    
80     -64    
624    208    
-272   240    
-496   128    
-272   -96    
288    80     
-176   -80    
176    16     
-608   80     
-144   288    
-176   352    
464    -96    
-416   128    
-112   0      
112    320    
240    -128   
-144   112    
32     0      
96     304    
-16    -32    
-352   64     
-912   -3168  
1664   -3056  
-144   -400   
-176   -608   
-112   224    
-416   -64    
304    288    
-832   256    
544    0      
352    16     
-16    -80    
-400   -48    
80     224    
416    80     
-208   48     
0      32     
-400   80     
48     -16    
-128   32     
496    -288   
-1552  -288   
464    -192   
-240   -64    
544    80     
288    0      
-432   0      
288    240    
192    304    
-320   160    
144    224    
-32    -16    
176    128    
-272   208    
-16    32     
80     240    
-112   -80    
-208   368    
-16    -80    
-32    96     
-112   -272   
64     64     
-128   -32    
-64    -16    
80     -192   
64     176    
48     96     
16     144    
0      112    
0      240    
400    656    
-512   272    
48     272    
-96    384    
768    -160   
-752   -224   
144    -416   
128    -256   
-16    16     
-400   304    
128    384    
-96    176    
208    160    
80     112    
-400   -48    
80     400    
0      64     
64     144    
0      -160   
-32    -208   
-16    -624   
-384   -640   
256    -624   
-208   112    
112    -64    
96     0      
80     -160   
-288   -608   
-64    384    
128    32     
80     160    
-16    -80    
-320   -384   
144    -2176  
-160   464    
1408   -176   
-784   192    
160    48     
-288   -288   
176    272    
224    -656   
-144   -160   
-128   48     
128    224    
-16    -48    
-64    0      
64     192    
96     -192   
-32    -32    
80     256    
-64    -192   
80     -16    
-256   272    
560    432    
-656   -160   
-16    -1168  
-112   128    
16     624    
256    -352   
-80    32     
16     96     
-288   -208   
208    -160   
352    224    
-64    576    
-80    112    
16     -64    
224    -144   
-128   112    
80     592    
-192   -336   
-208   -192   
176    208    
304    304    
-176   -240   
-144   96     
-176   336    
192    -144   
128    -32    
144    -32    
-160   160    
-448   512    
240    -144   
864    -400   
-1792  -64    
1856   672    
-64    976    
-720   576    
656    400    
-112   -240   
48     -176   
160    432    
-80    -144   
64     464    
48     224    
96     -192   
-272   -224   
80     192    
112    64     
-144   -128   
144    -48    
224    256    
-176   80     
64     -640   
-1472  1120   
1504   -1408  
80     0      
-432   736    
144    368    
416    1536   
-608   624    
-112   -1568  
480    -784   
-144   1152   
112    448    
-32    64     
96     -672   
64     -336   
160    -144   
-432   -272   
448    -992   
128    80     
-96    96     
32     -160   
-112   544    
-64    80     
288    416    
112    -16    
-864   16     
896    1104   
288    432    
-208   304    
160    320    
-384   -48    
752    816    
-368   -416   
-528   384    
-16    -1200  
-464   320    
1056   1376   
-976   896    
208    16     
304    -544   
-80    528    
-208   192    
-496   -704   
64     -368   
-240   -608   
-32    -416   
304    176    
-32    64     
-208   240    
112    -336   
240    -1680  
-2160  -304   
1040   912    
-192   400    
144    -1024  
-80    -1568  
-288   -528   
-48    768    
-128   464    
432    448    
112    -480   
-304   -192   
-64    -336   
128    592    
-16    -656   
272    -80    
16     -1472  
-144   -128   
208    -816   
-80    -304   
-64    -80    
0      416    
304    256    
560    -160   
-320   816    
352    -384   
-224   -272   
16     -928   
80     -800   
80     -864   
-480   160    
288    448    
256    672    
-192   -400   
-80    176    
224    96     
-288   -112   
112    -176   
432    80     
-208   160    
-112   288    
272    560    
-416   224    
304    672    
32     416    
96     544    
-112   -112   
-176   480    
448    224    
16     -288   
-80    -192   
-432   -16    
544    -288   
224    -400   
256    720    
-656   160    
336    864    
0      -384   
-32    -112   
-16    -1296  
-752   -592   
160    -432   
240    -96    
144    -128   
160    240    
-288   576    
160    -352   
-160   -224   
80     -1152  
-448   -480   
128    -560   
80     160    
128    -48    
-16    160    
224    208    
256    1136   
-368   1120   
288    800    
-112   -64    
-160   32     
288    720    
-64    -1744  
-80    -2352  
1232   -224   
-384   16     
-272   112    
160    -352   
80     256    
224    -336   
-352   -16    
192    160    
-160   96     
352    -432   
96     336    
-352   -1440  
128    144    
-16    -304   
144    -304   
48     32     
-80    272    
144    -192   
416    -1024  
-1536  176    
1312   80     
-656   -240   
-576   32     
1072   -208   
-592   -144   
176    -160   
-384   -352   
592    224    
-112   -16    
-32    -64    
-64    -64    
96     -352   
-160   -176   
128    -1072  
128    16     
-64    -464   
-64    96     
96     -16    
336    80     
-224   -128   
48     128    
-48    96     
224    224    
48     -16    
-288   -80    
-176   -176   
0      -128   
1232   48     
-976   64     
-176   -128   
496    -304   
-192   -304   
640    -624   
-896   0      
576    -80    
-176   -32    
352    -32    
144    -32    
-464   16     
80     -80    
-256   -192   
608    0      
-880   -64    
-208   128    
288    -96    
-320   -320   
400    -80    
-224   -704   
32     -144   
960    832    
176    -112   
-544   288    
1760   -288   
-1424  144    
480    -288   
256    -144   
-224   -400   
48     64     
-144   48     
80     -64    
128    -128   
32     0      
96     -192   
-80    160    
240    -176   
-208   544    
128    -48    
-128   -112   
304    32     
-320   -432   
48     -64    
-112   -144   
-592   -16    
224    192    
-576   288    
160    80     
-480   480    
240    -432   
384    16     
-144   -1360  
0      -16    
80     160    
96     16     
-432   -16    
496    -112   
-672   -128   
480    -256   
-224   240    
-48    -32    
-80    80     
272    -32    
-256   96     
160    -112   
-112   288    
256    -400   
320    48     
-320   0      
160    -528   
-704   2848   
2016   -752   
-1440  -288   
-512   -384   
896    176    
0      -352   
-224   112    
32     -448   
400    -224   
-48    -80    
144    32     
80     -304   
-240   96     
-80    -96    
480    64     
-320   112    
-352   0      
288    -48    
384    96     
-752   -112   
272    -400   
-144   -304   
272    -160   
592    192    
-400   -320   
-272   272    
672    -144   
-1408  -128   
288    -144   
-256   80     
-272   -128   
272    -112   
128    -224   
-16    -352   
-320   -464   
176    -480   
-176   -48    
-256   -352   
-80    -80    
-192   -112   
48     -48    
-272   -352   
96     -400   
-144   192    
-128   832    
48     240    
208    -1008  
-544   -784   
96     -496   
-128   -336   
32     96     
48     32     
112    -336   
-272   -128   
-176   -160   
-144   -480   
80     -816   
32     -624   
-720   -400   
0      -368   
64     -256   
-144   -352   
16     -96    
112    32     
-720   -256   
208    -688   
336    0      
-224   -736   
-320   -176   
32     128    
192    32     
-16    -80    
-112   -80    
-128   -80    
-192   -192   
-80    -784   
0      48     
-16    -592   
-416   -16    
240    160    
64     0      
96     1680   
352    112    
-480   -896   
-368   64     
144    368    
544    1008   
-704   1328   
-112   176    
0      176    
-96    464    
176    -384   
-176   416    
-448   -272   
176    384    
336    -80    
-192   288    
-176   -16    
16     368    
64     240    
0      272    
-320   1024   
672    -64    
-720   224    
-48    560    
208    80     
112    -288   
-160   192    
-208   -80    
-80    352    
0      -112   
32     112    
64     -368   
-16    80     
32     224    
-64    272    
-96    560    
112    -96    
-32    -48    
80     -176   
448    144    
-256   80     
64     192    
-352   -96    
64     128    
-352   -128   
464    -112   
-400   80     
-192   96     
256    160    
-496   -704   
1888   -1584  
-768   576    
928    -304   
-304   -240   
-160   32     
-192   -208   
-32    928    
336    -704   
-96    -288   
-464   -400   
96     720    
240    544    
-128   -464   
0      160    
32     -96    
48     400    
160    144    
-240   336    
208    -800   
-112   480    
416    304    
-1872  -688   
608    16     
-144   96     
-640   48     
704    496    
336    1360   
-384   2048   
-448   1456   
560    -128   
-592   -1120  
-336   -432   
432    64     
-272   288    
-176   160    
-80    128    
352    272    
-176   416    
-48    256    
0      256    
-80    -48    
-80    192    
128    432    
-112   -128   
-448   -784   
-304   -1488  
-400   -976   
496    288    
-784   288    
-64    176    
0      176    
-288   448    
-64    -96    
608    -384   
-256   -32    
128    240    
16     -1120  
944    -1664  
128    -80    
128    304    
32     352    
-384   96     
496    592    
-672   720    
272    512    
-544   368    
336    -208   
160    464    
-336   624    
-144   160    
-432   -2432  
-480   -464   
-192   -32    
176    -144   
832    -528   
-1056  80     
192    -304   
-16    1008   
464    512    
80     -80    
-416   320    
-96    -16    
320    448    
304    -112   
-352   48     
-384   144    
256    208    
368    80     
528    688    
-624   -272   
16     -256   
128    -704   
-208   304    
800    48     
-608   144    
-368   -176   
416    64     
-176   -48    
-64    -1728  
-32    -656   
-608   -512   
336    -320   
48     128    
240    -48    
-16    0      
-368   80     
0      112    
288    224    
-272   80     
80     208    
-192   32     
224    144    
-96    80     
64     -336   
384    272    
-336   -192   
144    -112   
272    736    
-288   576    
-16    336    
256    160    
-528   -960   
-96    -336   
288    -208   
-96    0      
288    64     
-96    112    
0      160    
144    -160   
-80    96     
16     80     
-48    -96    
96     -208   
0      0      
-160   32     
64     160    
32     -48    
48     80     
80     480    
-368   144    
224    80     
160    144    
0      -80    
-128   -560   
48     80     
-160   400    
736    -352   
-336   112    
-32    48     
208    128    
-416   -640   
1104   -1616  
-1648  800    
1200   -240   
-272   -16    
-496   176    
32     224    
752    64     
-80    -416   
-112   112    
-16    -256   
112    -80    
144    192    
128    384    
-496   208    
320    16     
-64    -256   
0      416    
256    80     
-176   -80    
16     64     
-352   160    
1472   -128   
-384   112    
-624   -208   
512    208    
272    96     
-112   -640   
-16    448    
-208   -160   
0      160    
544    -48    
-64    80     
-400   -96    
192    368    
368    0      
-48    -112   
-192   64     
144    -32    
32     144    
-96    -496   
304    64     
-48    -544   
48     80     
0      -1088  
-192   224    
624    64     
-560   80     
304    -32    
-48    80     
288    -1280  
-1920  -480   
2272   64     
-896   -224   
16     288    
432    -352   
-336   128    
-16    176    
336    416    
208    0      
0      96     
-304   -32    
48     128    
208    96     
48     240    
-208   176    
384    224    
-160   128    
-48    -128   
304    144    
-176   -80    
128    -240   
832    -192   
-1472  384    
704    -288   
448    240    
-928   32     
336    -48    
448    -16    
-240   -32    
-16    -128   
32     -112   
112    96     
-336   -144   
288    160    
96     -320   
-384   128    
224    -480   
48     144    
112    288    
-224   192    
-80    32     
208    -528   
-960   -176   
368    -384   
32     -1072  
0      32     
176    464    
-912   -976   
96     96     
464    336    
-544   192    
144    112    
-224   -1088  
160    192    
-160   -64    
-80    -96    
-256   -592   
624    -208   
80     144    
464    -192   
-352   80     
96     -1248  
80     -224   
16     16     
16     16     
192    112    
-128   -16    
400    -224   
-112   160    
-240   96     
2224   -928   
160    -32    
-736   144    
-880   -64    
-240   -240   
1120   96     
-304   -480   
-160   64     
288    -1232  
-480   160    
480    176    
48     16     
48     -320   
-80    -48    
336    112    
-368   16     
-80    192    
144    -96    
-1008  160    
96     -336   
-32    -80    
240    -112   
-544   -32    
464    -64    
-224   64     
-64    -304   
496    128    
-496   -288   
160    -16    
112    -16    
208    416    
-96    240    
-224   16     
-368   -432   
544    144    
-464   224    
-848   -848   
-176   -832   
448    -1088  
-272   -528   
-80    -848   
32     -96    
64     16     
16     -160   
304    -576   
64     -864   
-48    16     
-400   -288   
192    -672   
48     -128   
-208   224    
384    624    
448    416    
-320   640    
336    256    
-368   80     
624    2000   
480    1248   
-352   -1120  
128    -192   
-96    192    
0      96     
-64    -144   
304    208    
-240   512    
-80    -336   
176    -544   
-560   -272   
288    192    
48     -544   
48     -16    
128    48     
-64    -704   
224    240    
-288   -128   
16     96     
176    -32    
112    -176   
-432   -144   
48     144    
-224   -16    
-464   464    
1040   -368   
-768   208    
240    -96    
256    -256   
-64    -64    
320    -1216  
-304   -256   
-96    128    
240    -80    
-432   -80    
0      -80    
-352   -112   
224    -160   
-64    80     
192    -96    
-160   128    
-64    -272   
48     -32    
-272   -608   
928    -576   
-368   496    
640    -32    
-640   144    
64     32     
-176   -272   
256    -176   
176    -208   
112    112    
-192   368    
208    -256   
-32    112    
32     -160   
0      112    
96     -144   
-288   0      
-80    -336   
-256   -608   
48     -112   
272    -80    
80     32     
128    80     
-320   -128   
-16    176    
80     112    
400    -176   
-144   384    
-128   128    
256    48     
-240   -400   
1872   -112   
-1968  1360   
464    528    
192    912    
-496   112    
144    -336   
192    1696   
96     -688   
16     -352   
144    544    
-528   -256   
-32    16     
144    -368   
64     528    
-176   -320   
32     0      
-176   -272   
384    176    
208    880    
-176   32     
-576   -1136  
592    -608   
160    384    
-992   592    
816    848    
-448   176    
96     16     
-1072  464    
816    480    
-240   -528   
96     -96    
80     64     
-304   -240   
-224   -128   
-96    352    
192    48     
-96    560    
-816   576    
-16    -32    
384    768    
320    208    
-192   208    
-448   -176   
704    -32    
-400   384    
-400   -864   
-288   -112   
240    -496   
-320   192    
352    240    
-496   32     
-176   -48    
352    0      
-128   -336   
112    224    
-128   -224   
64     -32    
576    48     
-368   -224   
96     64     
96     208    
-384   32     
336    672    
-576   288    
224    112    
-416   -80    
-208   176    
128    -96    
-496   -976   
-64    -1056  
1200   640    
64     -336   
-752   48     
-592   -64    
-16    -144   
1024   -64    
-848   -80    
144    224    
-544   128    
592    224    
-128   -80    
-384   -32    
208    208    
-528   16     
400    256    
112    80     
-224   48     
272    16     
-576   192    
320    1552   
-80    912    
-176   -128   
560    96     
224    -16    
-384   128    
128    -48    
-176   304    
336    -192   
-528   64     
112    0      
-48    192    
96     384    
-176   352    
416    320    
-272   48     
320    288    
-560   0      
144    336    
208    144    
-192   96     
32     48     
-32    128    
-176   0      
320    0      
-256   -96    
224    -160   
-144   -272   
-64    16     
128    160    
-16    160    
-160   96     
-208   -864   
-528   176    
368    160    
96     16     
-64    -112   
128    -160   
96     144    
-144   -16    
-272   160    
208    64     
-32    -16    
-48    -80    
48     16     
-48    16     
-128   48     
-48    272    
304    320    
272    464    
-704   320    
416    0      
-160   -80    
-128   80     
16     -48    
-80    32     
-48    176    
-112   256    
16     -480   
-64    112    
96     192    
144    720    
-192   -2224  
-1376  352    
1952   -336   
-832   64     
-432   320    
176    528    
768    192    
-352   -288   
-80    112    
-64    80     
16     48     
416    32     
-192   64     
16     400    
80     240    
-224   -112   
352    96     
-288   128    
-112   -192   
112    144    
-32    960    
1104   -416   
-1024  -128   
32     64     
704    320    
-240   64     
-160   -128   
32     288    
-48    -288   
-80    128    
384    48     
-256   208    
176    112    
32     32     
80     48     
-416   -144   
544    16     
-256   16     
112    -64    
-96    112    
112    0      
96     112    
176    64     
-304   96     
272    224    
272    96     
48     112    
-144   16     
-64    96     
1152   352    
-2944  1248   
1744   336    
-208   48     
112    -1040  
-176   -176   
128    336    
80     864    
176    576    
560    144    
-144   -96    
-160   64     
-128   80     
96     16     
240    160    
240    80     
-448   -16    
368    128    
-256   112    
-80    -224   
96     64     
-192   -416   
1056   672    
-1120  128    
528    -112   
496    128    
-688   80     
144    48     
352    32     
352    -112   
-496   256    
48     80     
-592   -80    
-48    80     
112    -704   
352    176    
-240   -624   
96     112    
128    352    
-144   176    
0      -96    
48     192    
144    512    
-464   -128   
-352   352    
1168   -80    
-736   -32    
224    -176   
224    96     
-288   -48    
560    -80    
-48    144    
-304   32     
64     128    
208    176    
32     -368   
-32    192    
-80    64     
528    -80    
-48    192    
288    288    
-528   112    
80     -672   
-352   384    
464    -160   
-464   -48    
192    -704   
96     224    
176    112    
-480   -352   
512    -1312  
-1440  -1440  
960    336    
-288   0      
-208   16     
1056   288    
-96    160    
-752   -768   
-208   -624   
192    -288   
224    -272   
224    -512   
-96    -16    
-256   -320   
192    48     
208    160    
112    240    
-144   128    
-80    96     
224    208    
32     736    
112    1056   
144    176    
-64    32     
384    -1232  
176    80     
-224   -192   
-368   48     
384    848    
288    1424   
-128   -112   
-224   48     
16     128    
400    208    
-48    64     
-32    -80    
-288   -240   
128    -1168  
496    -368   
224    288    
-208   240    
256    -304   
-224   16     
48     224    
96     -1232  
-208   96     
144    688    
-256   64     
336    832    
-16    224    
-64    -848   
112    592    
48     -512   
-624   688    
880    96     
-448   528    
96     64     
-144   608    
-368   -128   
32     -656   
128    336    
224    -416   
-48    -64    
16     64     
96     -960   
-592   -80    
-16    -1072  
416    -80    
-32    304    
-144   32     
448    -176   
48     -32    
16     48     
-128   -16    
176    0      
-176   96     
0      0      
320    -112   
-96    -240   
48     -80    
208    96     
16     -176   
-480   -464   
544    -1184  
-640   32     
512    176    
-176   16     
64     -240   
432    -256   
272    -256   
80     464    
-16    -352   
112    -160   
-192   80     
-80    192    
-352   256    
176    -32    
-128   -128   
32     -16    
48     96     
80     -288   
256    0      
-560   560    
768    -176   
-896   -272   
528    -96    
64     -16    
208    -80    
-512   336    
352    272    
-96    -32    
-80    -96    
96     -192   
80     64     
144    112    
-160   96     
160    128    
-80    48     
0      112    
-272   688    
560    160    
-336   -160   
-32    64     
96     144    
208    -32    
-496   16     
-192   -336   
-1024  -96    
272    -32    
-416   -352   
656    -880   
-848   -1200  
2048   -2720  
-288   1088   
-448   -432   
592    0      
304    -272   
-96    224    
528    224    
-320   368    
-192   -304   
-160   208    
160    -464   
16     -128   
-320   -208   
-80    64     
352    144    
-48    -64    
-48    256    
16     160    
400    432    
-240   -240   
688    928    
-1472  -752   
-272   464    
736    -912   
-1488  336    
1392   -752   
-1152  -1280  
528    592    
432    384    
-224   64     
16     -176   
-48    208    
80     -2592  
400    -240   
-496   -160   
-16    208    
256    -160   
16     96     
-176   -64    
-144   -560   
-592   -272   
112    80     
32     -560   
-752   224    
848    -160   
-624   -544   
240    448    
608    -720   
608    -144   
-224   272    
-416   -16    
240    -112   
128    48     
192    0      
160    128    
-560   -576   
-288   288    
-368   -272   
144    -592   
352    128    
32     -368   
-304   160    
48     160    
-128   32     
-96    288    
0      48     
-288   -16    
288    -64    
-96    64     
208    1792   
1056   3728   
944    256    
-1584  80     
464    -320   
-80    -128   
-288   -112   
256    -192   
-160   272    
-96    -320   
-544   320    
-1072  -128   
-320   80     
176    -208   
96     80     
-176   -112   
192    240    
48     -336   
-96    176    
-672   -992   
-416   0      
544    -512   
-608   208    
288    -160   
368    160    
-320   32     
-560   48     
1040   -16    
-384   176    
-96    -16    
-304   -64    
-16    -80    
48     96     
-352   160    
240    144    
192    -64    
-272   160    
64     144    
-816   32     
928    32     
-224   -48    
-48    112    
-224   -32    
-432   -64    
496    -112   
-400   -272   
352    80     
-112   -112   
80     96     
480    112    
-256   160    
-208   240    
112    -704   
-1008  32     
736    48     
-944   288    
464    48     
240    -160   
-448   16     
48     96     
-32    -32    
160    48     
-16    -160   
-176   -16    
16     -48    
128    320    
-240   -48    
-16    -768   
-304   -464   
288    560    
448    160    
-432   -96    
144    80     
-96    -48    
0      96     
-16    16     
240    304    
-400   -32    
96     -320   
128    -544   
-160   288    
624    1792   
-944   -2128  
-1056  352    
1872   -272   
-1072  -48    
-336   96     
656    288    
352    384    
-192   48     
128    -512   
-496   336    
-160   48     
624    -144   
-32    352    
-480   -48    
-32    -16    
272    -80    
-16    160    
-80    -160   
-208   112    
-80    176    
832    944    
-32    -128   
-672   -192   
112    -128   
-224   112    
208    -80    
384    64     
-144   224    
-272   -112   
16     48     
240    0      
-160   48     
304    -32    
-192   0      
80     0      
48     -80    
-368   -96    
464    80     
-112   160    
208    128    
-320   128    
224    32     
-256   96     
336    -32    
-320   240    
320    112    
-208   256    
160    -80    
-224   -272   
1584   336    
-3008  816    
-1216  640    
2080   272    
-1264  -432   
-592   208    
1024   384    
-464   528    
-192   608    
96     128    
224    -144   
-80    -80    
-80    176    
-160   -208   
448    48     
-576   -160   
192    224    
-96    -96    
144    80     
32     -576   
-240   128    
544    656    
-1520  16     
288    432    
688    288    
-832   -560   
192    -32    
-160   272    
-48    192    
0      -80    
32     144    
192    -144   
224    304    
-128   80     
112    224    
-160   -16    
-256   224    
448    384    
-432   304    
208    -160   
112    -48    
-192   -32    
112    160    
-464   704    
-288   -272   
208    288    
112    0      
64     -720   
-496   480    
640    176    
-960   304    
176    -16    
-80    -64    
192    176    
32     656    
-272   416    
-768   288    
240    -160   
656    -400   
-336   96     
-256   480    
576    -16    
-272   160    
-96    -208   
176    -32    
-16    -16    
480    -176   
-192   160    
320    -208   
-224   80     
-16    256    
-1104  1968   
192    624    
-224   -592   
-464   -496   
1184   704    
-288   464    
-1136  -1152  
224    -384   
352    736    
-368   256    
208    -16    
-336   96     
256    288    
64     304    
32     -16    
80     -576   
-416   384    
16     176    
320    288    
-208   -16    
64     80     
-64    96     
320    -112   
-128   368    
464    -1792  
-64    848    
112    960    
-176   736    
64     -256   
320    240    
-272   -224   
-368   -224   
-176   -432   
128    592    
496    1168   
96     1120   
-272   576    
384    -208   
16     -176   
16     320    
-64    32     
-128   400    
192    16     
160    128    
-128   704    
-16    -704   
-112   -272   
-320   -400   
352    400    
-96    144    
-272   -272   
784    -144   
-736   880    
336    96     
-320   -208   
-176   -160   
-48    512    
80     1648   
16     304    
-16    -144   
64     -112   
48     128    
48     -608   
176    -320   
128    0      
-96    272    
0      240    
-64    64     
-208   80     
96     -224   
192    32     
-32    -896   
-272   160    
272    -112   
160    -16    
-240   112    
384    96     
-304   160    
-80    304    
192    112    
-80    176    
0      848    
384    -224   
-320   128    
64     -112   
160    96     
-16    -128   
144    160    
160    400    
-80    96     
288    -320   
208    -208   
0      32     
-80    272    
144    16     
-128   -192   
64     -208   
240    -192   
192    192    
-48    192    
16     640    
-32    -544   
160    160    
464    -848   
-672   -256   
176    112    
-80    -16    
400    -128   
336    528    
272    -192   
-608   -544   
160    -64    
240    400    
208    -272   
160    -64    
-528   352    
128    -672   
224    480    
208    -656   
-128   448    
-112   -368   
64     320    
96     256    
368    320    
-224   80     
-336   -160   
368    48     
144    32     
-32    64     
-32    400    
1072   384    
-2464  96     
752    -208   
32     -336   
-368   64     
256    -304   
-240   96     
320    -416   
-464   -336   
384    -128   
-496   -80    
416    64     
112    -80    
-32    -208   
-384   -160   
208    -16    
272    -32    
32     -256   
128    -240   
-16    320    
-16    144    
480    1232   
-352   -976   
-640   -224   
208    -720   
368    -96    
-592   -1280  
-64    80     
784    -208   
-784   144    
384    112    
-112   -240   
-256   144    
384    32     
16     -496   
-160   128    
176    -176   
-176   192    
-864   -16    
-96    -560   
-144   -192   
128    -272   
256    432    
400    -320   
0      112    
112    -368   
-160   -32    
304    -224   
736    -240   
288    -512   
-704   112    
432    -16    
96     -64    
-368   64     
-432   -384   
-288   -1200  
-128   -400   
96     -32    
-288   176    
-720   368    
544    -544   
144    32     
-272   -144   
-48    368    
336    -128   
144    384    
-736   -192   
-80    0      
432    32     
-704   -640   
-672   -1552  
2592   -3056  
-400   -272   
48     -416   
-144   272    
496    -560   
128    -256   
32     -1520  
-160   80     
0      -16    
352    48     
-304   160    
-80    -32    
528    304    
-32    -144   
-144   0      
-176   -80    
-608   112    
144    -80    
-400   -80    
496    -192   
-608   96     
32     -688   
624    80     
688    -240   
-80    -80    
-128   400    
240    64     
-272   144    
240    -320   
-272   -144   
-288   -112   
-128   -112   
96     144    
-112   -112   
448    -208   
-304   -208   
-192   -224   
240    -48    
-944   32     
592    -48    
-368   -32    
256    -64    
-336   -176   
-112   -224   
160    -48    
128    48     
64     -48    
-128   -304   
-736   -64    
96     -144   
160    128    
-272   -880   
48     0      
-176   -2992  
32     48     
496    -144   
16     -496   
-656   160    
208    144    
240    -16    
-96    0      
-352   80     
288    48     
176    96     
-80    -64    
-144   -96    
176    -96    
464    368    
-320   -1056  
160    -240   
112    -304   
-112   272    
-16    352    
160    -144   
-128   -96    
-144   -288   
288    32     
80     16     
16     48     
-80    -144   
-160   -32    
352    -2352  
-1584  704    
1584   -304   
-400   64     
-672   48     
336    -32    
16     -192   
560    32     
-496   432    
48     -400   
16     48     
176    64     
-80    -48    
-80    528    
-32    -160   
-336   -320   
192    32     
-112   -64    
-16    -160   
-112   144    
-416   1264   
560    -352   
-784   -48    
320    304    
-96    144    
112    -32    
-1104  -784   
128    -48    
-320   -64    
32     -16    
144    16     
-288   -48    
96     -112   
-224   128    
208    16     
-496   0      
80     -112   
-128   -64    
224    -112   
80     16     
32     224    
-96    -48    
-32    144    
144    16     
-368   96     
368    352    
-208   -160   
64     -96    
-320   -64    
400    784    
288    -112   
-1664  432    
1392   48     
-656   288    
-320   112    
-144   592    
-16    272    
400    176    
-64    -400   
-32    128    
-48    96     
-80    32     
80     16     
-128   272    
496    384    
-416   64     
-80    32     
-64    -128   
256    144    
-720   -96    
416    208    
-1552  960    
896    -96    
-464   176    
352    -112   
-128   -144   
80     -128   
352    144    
-112   224    
-176   -656   
-256   -48    
16     96     
16     -96    
16     0      
112    0      
96     112    
-464   128    
432    -192   
-32    -96    
48     176    
-208   272    
-48    320    
176    144    
-80    -48    
128    304    
-304   -32    
-576   -1328  
-624   -464   
384    -336   
-784   -16    
112    80     
-560   -384   
224    -192   
16     512    
496    176    
-464   -832   
128    -256   
-352   -416   
-96    -144   
176    480    
-48    0      
-32    -224   
-256   -400   
32     -96    
-144   -368   
752    128    
176    128    
0      -352   
32     -80    
-160   -80    
832    2048   
-496   352    
-320   608    
2240   -176   
-1296  1024   
-112   -256   
464    176    
96     624    
-336   -384   
-224   32     
144    -16    
-32    576    
144    -176   
32     -224   
-304   464    
32     -368   
-272   -112   
192    256    
-384   176    
320    192    
-96    1200   
-160   -16    
320    -128   
-48    -112   
-336   -400   
112    656    
-672   592    
-416   -720   
704    880    
16     208    
-80    80     
-272   -192   
176    208    
0      -912   
-32    -304   
96     -80    
-272   432    
112    672    
176    -608   
-96    80     
-128   144    
208    496    
-224   -640   
240    144    
48     -416   
-240   -640   
176    496    
240    -224   
32     -864   
-160   384    
-288   64     
-96    -608   
192    -928   
-160   -384   
-528   -416   
560    224    
496    208    
-112   -240   
-320   -336   
-16    304    
144    128    
176    128    
-64    112    
-256   112    
-48    256    
144    208    
-400   -384   
128    336    
16     96     
-464   -128   
416    112    
-176   -48    
192    -80    
-128   -176   
304    -16    
-32    768    
96     432    
288    224    
64     640    
-16    288    
-112   32     
176    1696   
1248   -432   
-1136  -48    
144    48     
0      -176   
96     -304   
304    -768   
-432   64     
112    -80    
16     656    
208    112    
80     -240   
0      688    
-160   64     
96     176    
16     304    
-48    192    
-16    144    
48     -112   
80     272    
32     1232   
384    240    
-368   1056   
144    160    
0      544    
192    -144   
-320   0      
-16    176    
208    544    
-144   704    
-64    160    
112    32     
-32    560    
-160   -160   
32     -2096  
144    -256   
256    -416   
-272   -64    
128    -96    
-16    112    
-16    128    
48     -32    
128    0      
-96    64     
368    64     
-112   160    
-144   16     
-64    -48    
192    96     
-288   944    
1264   -544   
-2480  464    
1392   -48    
-64    -144   
-1088  224    
1056   -80    
-48    64     
-32    -176   
-64    160    
-16    -144   
96     208    
-112   -16    
352    96     
-560   16     
160    -544   
144    -32    
-160   -240   
-64    -32    
192    80     
144    128    
-80    240    
-160   -176   
1856   -400   
-1184  80     
448    160    
160    240    
-240   32     
752    416    
-928   144    
16     -96    
240    128    
-128   -736   
96     -16    
16     64     
320    144    
-192   -336   
32     -48    
0      256    
32     224    
-48    0      
96     48     
-480   -576   
592    112    
208    256    
32     -320   
240    640    
-432   80     
544    -144   
528    240    
592    192    
-464   -112   
-224   144    
288    -32    
-176   64     
272    576    
96     16     
336    256    
-80    80     
-112   112    
16     48     
-64    -16    
-256   -848   
-48    176    
224    -448   
128    352    
80     -144   
-480   -96    
-496   160    
352    144    
-960   -128   
16     3504   
640    -32    
-1568  -1328  
464    -496   
720    -144   
384    336    
-1280  -976   
112    0      
912    208    
144    320    
-256   -112   
-160   240    
160    80     
48     224    
128    96     
-304   -208   
112    80     
32     -32    
544    624    
-384   0      
-160   528    
704    -592   
-400   272    
784    64     
-640   64     
384    448    
256    144    
-464   192    
704    -176   
64     160    
-32    -32    
112    -176   
-128   -240   
-16    208    
656    -96    
-656   144    
624    -144   
-128   96     
16     -576   
48     -2144  
96     -48    
272    -352   
48     16     
-96    368    
368    -48    
-816   -336   
560    -624   
-96    -176   
-80    -608   
128    -64    
-80    144    
-96    -976   
-512   96     
640    688    
-416   -32    
208    112    
64     -80    
-208   64     
-208   -352   
0      -32    
48     96     
16     -144   
-128   -32    
208    -256   
-64    -192   
96     -1344  
-320   -256   
112    176    
80     160    
-320   352    
208    32     
128    -128   
48     -496   
-288   128    
80     -304   
-576   -128   
208    80     
-224   512    
416    144    
0      112    
-176   -1344  
80     -2064  
-1360  528    
2208   80     
-1296  496    
-192   -256   
256    -16    
672    384    
-384   144    
-336   304    
-688   224    
224    256    
256    80     
-112   -304   
-96    320    
64     -64    
-48    -528   
144    -784   
-80    32     
16     -64    
48     192    
432    1712   
-176   896    
-432   -656   
160    -784   
96     -16    
-224   512    
-512   352    
160    -304   
-160   48     
160    -160   
48     48     
64     -720   
-112   160    
240    -96    
0      320    
0      -64    
96     -320   
-64    -240   
-160   -464   
-160   208    
256    -112   
-912   -144   
-64    112    
-128   -176   
112    -272   
192    192    
-160   -1088  
160    32     
144    464    
768    1584   
-336   -224   
-1600  -432   
2224   480    
-416   -48    
-832   32     
1056   64     
-800   -1280  
-64    144    
352    416    
-48    -80    
-144   32     
96     64     
320    336    
-336   -608   
-32    -272   
448    -240   
-80    -368   
-304   -800   
416    -400   
-96    592    
-496   -400   
496    -96    
592    -32    
-944   -608   
320    320    
288    -256   
-448   -1696  
96     -1168  
-400   -960   
16     -432   
-208   272    
240    160    
-80    352    
-80    -288   
0      -432   
160    -288   
-400   -592   
128    -1360  
16     -1040  
32     -96    
-144   448    
240    240    
-224   192    
352    -112   
-160   1008   
-48    784    
-96    416    
464    480    
-128   1648   
624    448    
-496   -688   
-256   368    
352    528    
400    272    
-1360  48     
-144   192    
-1360  -192   
736    -64    
64     160    
-160   544    
336    400    
-768   176    
96     -240   
-112   -112   
-80    128    
-192   -16    
192    32     
-480   80     
368    -208   
-80    -288   
672    640    
-2816  -480   
1008   -288   
608    448    
-32    704    
-432   912    
-816   -864   
400    -1936  
-240   368    
416    96     
-496   -176   
-304   48     
368    -1024  
128    672    
-64    32     
32     112    
-32    192    
-400   -144   
32     -64    
80     -224   
-80    336    
-144   0      
192    304    
304    -176   
-560   -128   
16     -256   
-512   -528   
96     448    
336    1424   
-16    32     
16     -240   
-288   -144   
-368   48     
416    -96    
-16    32     
-272   -48    
32     -96    
272    1120   
-32    560    
96     -848   
128    48     
-288   64     
176    -48    
-64    -48    
-176   480    
304    1088   
-256   128    
-176   16     
32     -416   
160    384    
-80    336    
240    480    
480    256    
-800   128    
304    -192   
16     432    
-400   784    
-96    128    
192    -848   
-224   -1024  
-176   -512   
192    208    
80     176    
-96    48     
352    112    
-432   -192   
-16    112    
288    400    
-224   288    
-80    384    
-32    -48    
-128   -96    
176    -304   
240    -176   
-144   64     
16     -208   
80     512    
48     496    
-64    144    
-176   -272   
640    1264   
-1360  -32    
288    736    
224    -624   
-624   -144   
224    64     
-208   -448   
-480   -640   
112    112    
304    64     
-384   112    
-48    96     
224    64     
16     -32    
-288   64     
272    624    
-272   640    
-80    144    
160    -112   
-128   32     
-240   0      
656    1808   
-352   -176   
-352   -96    
800    -208   
-608   -96    
288    -224   
16     368    
96     128    
-192   176    
-176   96     
176    -80    
160    -96    
-208   -32    
144    288    
112    64     
-224   288    
288    -176   
-416   192    
496    -16    
-608   112    
768    80     
-272   32     
32     96     
-112   -128   
-224   32     
368    96     
-32    0      
-320   96     
544    320    
1856   1696   
-2272  -1472  
-2960  -352   
1584   -336   
656    -400   
656    704    
-1008  960    
112    992    
16     576    
-160   -272   
352    32     
-256   -32    
128    144    
-192   -112   
-288   -32    
80     -112   
-176   -64    
-128   96     
256    16     
400    272    
-112   -48    
-112   -416   
1104   960    
-304   96     
-864   -304   
160    112    
336    0      
-480   -96    
-16    -256   
208    32     
-32    144    
0      96     
-160   64     
128    128    
-144   -288   
112    64     
208    208    
-368   -240   
624    -192   
-224   -128   
-192   64     
-64    96     
256    704    
-992   -192   
816    160    
64     -16    
304    656    
-112   544    
-192   496    
288    -112   
304    512    
144    144    
-80    48     
48     320    
128    -64    
272    240    
-256   336    
288    -32    
768    192    
-176   384    
-32    96     
384    112    
64     160    
112    -16    
-144   160    
-176   -96    
704    -240   
-112   112    
352    -96    
-240   144    
-224   -1072  
-1184  1664   
1872   -368   
-1520  -64    
-176   -656   
0      -128   
480    -336   
304    48     
-272   608    
-576   192    
80     320    
688    -64    
-160   0      
-16    48     
-352   160    
544    160    
-368   48     
176    128    
-272   -112   
192    16     
32     -128   
-320   -16    
736    -128   
-784   96     
576    144    
-32    64     
-128   176    
208    -48    
-304   -96    
512    -528   
-208   -192   
0      -176   
0      192    
144    160    
304    -48    
-224   432    
288    -624   
-96    240    
624    -128   
224    -112   
-64    -48    
176    160    
-320   160    
640    160    
-160   336    
192    208    
128    16     
48     0      
-112   0      
-96    0      
320    48     
-32    -256   
336    768    
-784   -144   
416    176    
0      80     
-144   80     
-96    -256   
-128   -928   
-112   -816   
304    -48    
112    16     
80     -144   
0      144    
96     128    
-224   160    
160    -640   
0      -64    
144    -32    
-128   128    
160    -80    
16     -80    
464    832    
-656   976    
416    -128   
336    -400   
32     256    
-304   480    
-208   80     
368    -1056  
0      -320   
-48    48     
-800   576    
1568   -624   
-896   752    
-112   -288   
784    288    
-512   -800   
96     -800   
-112   1504   
288    -704   
-160   544    
32     128    
0      128    
48     -32    
256    128    
-80    -400   
-80    80     
0      -112   
16     144    
96     -384   
-32    32     
-320   -128   
560    -48    
-240   704    
-432   448    
304    192    
256    -880   
-192   160    
32     400    
432    512    
-80    -688   
48     224    
-64    160    
-32    80     
-96    -96    
208    -144   
-320   240    
32     -80    
560    -544   
32     192    
-256   224    
48     -32    
128    -656   
176    -208   
272    112    
-400   -16    
176    288    
-176   112    
-32    -112   
304    32     
-16    -1008  
-1328  192    
2224   -16    
96     -16    
-1648  416    
864    80     
464    -192   
-528   -32    
256    -272   
176    -96    
-128   448    
-64    96     
112    -256   
-144   -368   
192    -16    
256    -112   
-96    64     
-112   128    
240    -64    
-384   0      
-64    16     
528    1040   
-464   -1376  
-336   512    
960    576    
-768   448    
416    -608   
0      -688   
-624   -1184  
432    176    
144    880    
-128   576    
-16    -672   
128    0      
-384   96     
272    -736   
-48    -432   
0      16     
-48    -16    
-448   -96    
368    80     
128    -928   
-304   -336   
528    -736   
-224   240    
-608   -768   
96     -944   
96     -464   
1152   704    
528    880    
-400   -880   
32     -560   
-32    -656   
-128   96     
-64    -784   
448    576    
384    -400   
32     -624   
736    -672   
-352   -16    
544    336    
160    288    
-288   16     
112    -384   
-224   -144   
224    -48    
-336   96     
-288   -96    
-1184  80     
112    -320   
-208   -112   
784    1520   
-528   880    
272    -1840  
1216   -304   
-1456  -256   
0      272    
464    224    
-16    -352   
48     992    
-176   704    
-64    -576   
432    -336   
-320   240    
-464   -176   
-32    400    
112    -448   
64     -224   
-144   -368   
-240   624    
272    1248   
336    720    
240    240    
-176   -400   
-784   64     
320    -1008  
-80    48     
272    816    
0      448    
-432   -176   
160    160    
128    -656   
-32    -272   
384    -320   
16     336    
320    -256   
-80    -768   
-112   -80    
320    32     
-464   -320   
-96    -464   
64     -368   
-176   -128   
-160   0      
32     -16    
208    256    
112    592    
448    432    
32     480    
96     704    
-400   64     
112    112    
768    1216   
-880   144    
-336   -112   
912    -176   
-352   -32    
288    464    
-80    592    
32     480    
256    -80    
-208   0      
144    16     
-224   -336   
-576   16     
80     192    
-112   128    
0      304    
384    192    
96     992    
368    512    
112    224    
-368   400    
176    400    
352    176    
-272   -96    
-704   -336   
464    -64    
-272   -48    
-560   208    
-32    144    
-176   32     
1088   2928   
976    -400   
-1760  304    
544    -192   
-256   64     
384    -96    
-144   -64    
32     -144   
-336   -272   
-288   -192   
560    16     
-288   80     
-144   192    
-48    -80    
304    -432   
192    16     
-496   176    
112    32     
-256   -240   
-80    64     
416    -560   
-1072  752    
816    -256   
-640   -16    
-16    -128   
304    -224   
-208   208    
-32    64     
-112   112    
224    16     
-224   -48    
-16    208    
-96    80     
-400   16     
80     32     
144    -288   
-48    -128   
144    -96    
-176   240    
448    -48    
-288   -16    
-128   -32    
-192   -32    
48     112    
-64    -32    
-192   192    
528    -112   
-752   80     
176    0      
144    -48    
-192   528    
512    416    
16     304    
-288   -160   
400    304    
48     -112   
-960   128    
352    -144   
208    -48    
-176   80     
-128   160    
192    48     
-256   48     
96     32     
400    160    
-480   32     
-128   128    
416    -32    
80     112    
-48    64     
48     128    
-704   -336   
1600   -80    
-240   -208   
-816   352    
2128   -32    
-1040  48     
496    176    
352    320    
-368   -64    
-112   48     
-16    208    
-512   -208   
-80    144    
80     48     
304    64     
-80    64     
-16    -16    
80     -144   
80     -48    
-144   96     
144    544    
64     -288   
-1024  208    
1360   112    
-1088  176    
-144   144    
400    -448   
-192   -304   
-416   464    
208    288    
128    -336   
256    -304   
-304   128    
-160   -48    
-720   400    
592    -288   
-368   -304   
112    -128   
320    -128   
-528   128    
352    16     
-400   32     
112    128    
32     -48    
272    160    
-448   96     
-64    80     
272    32     
192    1328   
-2080  1056   
832    1648   
800    0      
-1120  -368   
608    384    
0      192    
-256   48     
-208   64     
112    304    
-32    -96    
-96    176    
480    0      
-448   80     
80     64     
208    0      
256    -112   
-384   80     
80     64     
-80    256    
176    -208   
-128   816    
368    480    
-384   -80    
0      48     
560    -256   
-672   160    
752    -144   
-176   144    
-368   -192   
336    -48    
-272   -144   
304    -96    
16     160    
80     160    
-272   -48    
-256   16     
336    256    
-112   592    
384    112    
-256   96     
32     112    
48     -752   
-560   -368   
384    208    
-80    432    
384    640    
208    768    
-240   384    
320    160    
-128   720    
112    528    
-240   -800   
368    0      
-64    32     
-256   176    
448    992    
112    2016   
-400   1744   
176    1216   
48     192    
16     -96    
-48    -272   
112    48     
-32    -80    
-144   112    
192    240    
-208   -256   
176    240    
16     128    
-48    112    
176    -336   
-16    352    
0      320    
416    224    
-176   384    
224    64     
224    256    
-544   -80    
384    368    
160    48     
-64    112    
-16    -736   
-400   -496   
160    448    
-96    240    
16     128    
144    32     
-144   912    
224    480    
-400   160    
-48    192    
-80    -48    
-32    64     
-16    -80    
-32    -48    
160    32     
-208   -80    
-128   -176   
208    80     
224    -112   
176    16     
-704   784    
1024   -288   
-1088  16     
672    224    
-192   320    
-96    160    
224    224    
-464   -16    
176    -208   
192    -16    
80     -144   
-192   272    
-64    -80    
368    -416   
96     288    
208    304    
-16    -16    
-272   352    
48     432    
256    224    
-288   0      
16     -80    
96     -32    
16     -96    
144    16     
64     144    
-144   64     
176    -32    
0      112    
-560   -672   
2080   -960   
224    1136   
-656   -368   
992    -736   
48     144    
-400   -272   
1232   -688   
-384   864    
288    -112   
-128   752    
256    -784   
256    -528   
192    -544   
-272   -368   
32     272    
160    -64    
80     -64    
256    -304   
-176   240    
-16    80     
240    -272   
-1872  560    
1504   -336   
-400   -944   
-16    -608   
576    -256   
-816   -976   
-320   -2336  
352    -384   
16     1184   
0      96     
-112   -112   
128    -160   
48     -32    
32     -176   
320    176    
-160   96     
208    816    
512    528    
-272   672    
-96    -32    
16     144    
288    432    
-96    736    
-352   -544   
576    -1040  
-288   -672   
480    -1104  
-768   -784   
816    272    
-128   -32    
-464   -96    
384    -32    
-256   -48    
-272   -832   
384    16     
0      368    
-160   -672   
272    96     
-208   -608   
192    -48    
-208   224    
-288   64     
512    -144   
0      -128   
464    32     
-112   224    
-32    -128   
768    624    
-208   480    
-1088  -1056  
240    560    
-400   -96    
-608   -320   
1152   -1008  
-352   192    
96     112    
496    -2720  
-384   592    
-160   -352   
176    -784   
-80    -336   
320    -16    
-224   64     
-32    256    
16     32     
64     -32    
208    -48    
-240   -1280  
-544   -1376  
416    -912   
-112   464    
-112   -704   
368    240    
-304   -80    
-592   320    
304    -576   
-144   -592   
32     -272   
176    -1472  
-144   -256   
176    96     
-48    64     
144    -368   
64     128    
192    112    
-96    464    
176    208    
272    304    
-976   128    
32     -128   
-256   -176   
416    -144   
480    -80    
-240   0      
-48    0      
240    -848   
-80    -320   
-96    -336   
0      32     
-32    -16    
272    -304   
-1056  -96    
672    0      
48     -224   
-528   -112   
-48    -128   
-208   -64    
-80    16     
448    -400   
-256   64     
320    -1392  
-272   -32    
-16    272    
320    128    
-64    -480   
-560   64     
96     16     
128    -640   
-784   128    
496    -240   
-304   -48    
16     448    
-64    64     
64     -368   
240    -304   
112    -704   
96     208    
-160   -128   
16     128    
-288   -592   
1696   2224   
896    224    
-1472  336    
480    272    
-272   -64    
-208   -192   
-32    128    
528    272    
-800   -48    
224    0      
400    -80    
128    -80    
-192   -336   
0      544    
400    -480   
80     48     
-64    272    
64     -176   
-224   -64    
128    -160   
-464   -816   
944    -400   
-320   432    
-896   -96    
624    160    
-48    -400   
320    48     
-512   -608   
224    64     
0      0      
464    64     
-384   64     
64     -192   
-304   176    
160    -64    
-288   32     
-128   -112   
0      -80    
-96    -32    
272    -144   
-224   -432   
32     96     
32     -560   
192    16     
-592   -128   
448    96     
-368   -48    
64     -48    
-112   0      
288    1120   
2016   -2800  
-2976  1056   
-32    224    
896    -528   
-336   128    
-64    -496   
-800   416    
1008   -736   
-512   -368   
-144   32     
-16    64     
-176   0      
128    -80    
304    -32    
-336   -64    
-144   112    
224    -160   
-208   -96    
192    -80    
-96    96     
-80    96     
64     368    
672    -432   
-624   1200   
-192   -416   
-144   320    
16     -160   
-304   -32    
240    192    
-144   -272   
-288   112    
352    -144   
-96    48     
-640   -208   
128    192    
-208   0      
-32    16     
-368   -336   
-464   -176   
-16    192    
64     48     
128    336    
-80    -80    
-784   352    
896    -176   
-416   -16    
-448   -16    
80     32     
-96    -576   
432    240    
-176   -176   
-192   48     
320    -208   
-112   320    
-208   272    
688    -288   
-320   192    
80     160    
176    32     
-320   64     
160    48     
0      -32    
-112   112    
64     -112   
0      16     
368    32     
-240   -64    
-176   32     
256    96     
-96    96     
-1744  -1904  
112    -80    
-368   32     
64     128    
480    -208   
16     48     
-576   496    
384    176    
-112   -208   
112    48     
-160   -224   
112    384    
-160   -64    
16     240    
224    -144   
-16    208    
-64    -16    
16     128    
-208   -688   
64     -624   
128    736    
-272   224    
64     96     
-352   -32    
336    -272   
-224   288    
176    176    
-96    240    
-144   544    
416    1008   
-560   -96    
192    -448   
16     -336   
32     656    
-208   64     
-176   176    
144    -512   
-48    -16    
-320   32     
240    288    
-48    80     
-112   352    
128    112    
-32    176    
112    1216   
16     1408   
336    304    
-608   256    
112    352    
-112   -128   
48     -48    
512    656    
-880   0      
-1216  -64    
400    544    
-320   32     
208    288    
-112   1616   
704    1456   
-352   -192   
224    288    
208    -208   
-176   352    
192    32     
16     160    
-80    144    
16     -80    
80     192    
-720   -112   
16     32     
-48    128    
160    48     
-192   64     
-80    64     
0      64     
128    96     
-304   432    
192    -48    
-240   -64    
32     -80    
64     160    
-448   -320   
704    -480   
-912   208    
800    -32    
32     48     
-304   48     
-240   -192   
704    -208   
112    464    
48     400    
-256   -96    
16     144    
16     160    
144    0      
-144   144    
-240   64     
-32    544    
368    208    
-32    -48    
-144   -48    
432    -224   
-1520  304    
992    160    
-240   0      
320    -192   
-48    368    
-608   368    
592    400    
-656   -48    
192    -160   
128    -32    
96     48     
-336   160    
-96    112    
240    32     
64     -32    
-64    80     
-96    -448   
224    -64    
96     0      
-80    240    
-80    16     
128    -96    
112    48     
256    48     
-304   -128   
-416   176    
96     272    
64     48     
112    48     
-688   -1152  
-976   272    
1088   -176   
-1040  528    
704    736    
-112   368    
-848   -1440  
256    160    
96     1728   
-432   208    
256    -288   
-16    80     
-288   112    
224    0      
272    32     
-80    176    
-368   160    
192    224    
144    768    
-32    -16    
-272   -1008  
1248   512    
-1440  -176   
288    96     
400    768    
-240   -384   
-80    -448   
480    -160   
320    112    
-80    1120   
-192   592    
-112   -16    
368    -96    
-304   384    
224    160    
96     0      
-480   96     
688    160    
-688   16     
16     -240   
144    -48    
112    16     
512    -32    
-128   1664   
48     -352   
-1168  -96    
656    128    
544    624    
-1184  544    
416    -464   
64     80     
16     -176   
-32    272    
-208   -320   
160    -544   
992    448    
-96    16     
48     224    
656    -32    
96     1056   
-688   160    
80     112    
512    16     
-32    80     
-368   160    
-208   -192   
752    -112   
48     304    
-576   16     
-112   592    
864    656    
464    -1936  
0      352    
1328   224    
-1216  144    
-448   368    
1216   768    
208    304    
-416   240    
16     -48    
48     96     
48     80     
16     16     
-48    224    
128    -160   
32     96     
-96    -48    
176    -16    
-592   -288   
960    -800   
-384   -96    
128    112    
0      208    
-736   -48    
400    -48    
256    128    
-256   16     
32     -32    
16     96     
-32    -128   
128    160    
128    -656   
-448   160    
624    -752   
-272   240    
32     160    
128    320    
336    -144   
-128   0      
64     -96    
48     288    
240    80     
-176   32     
112    -96    
-272   -48    
224    80     
256    -144   
-400   -16    
304    -288   
-80    192    
160    -544   
-256   -544   
928    -480   
-80    176    
-224   -80    
32     224    
144    272    
-352   128    
352    256    
96     80     
176    0      
-256   -592   
320    96     
0      -80    
-192   160    
288    -640   
-80    -272   
-160   -304   
-64    96     
288    -256   
-96    416    
16     64     
128    -448   
-96    32     
192    -48    
-192   512    
16     -576   
48     64     
-96    -400   
128    -48    
48     320    
-912   -1840  
672    -32    
320    96     
-1248  -496   
832    80     
256    -208   
-384   352    
-192   -672   
64     0      
432    240    
-112   -304   
-32    224    
-32    -80    
-16    -192   
192    -112   
-96    240    
96     -224   
112    -928   
96     208    
-64    -336   
128    -592   
-480   560    
464    -1008  
-384   -16    
544    48     
-80    -608   
-480   336    
336    128    
-240   -736   
208    128    
-16    -896   
32     32     
-208   -80    
304    -160   
-128   96     
288    48     
-544   48     
-144   -128   
656    -176   
-32    -1680  
-192   -48    
-192   144    
208    48     
48     -560   
-64    -80    
96     -544   
-176   -176   
112    -16    
160    0      
-352   144    
816    -128   
-336   1056   
720    -720   
416    -64    
-672   -304   
-320   432    
608    -240   
240    -400   
-128   -528   
-112   32     
-128   112    
160    64     
-48    0      
112    -352   
-768   -144   
352    -288   
-192   128    
272    176    
16     416    
384    -288   
-336   -160   
576    -192   
768    -32    
-576   688    
-192   272    
32     -32    
160    384    
352    -240   
64     16     
-656   -48    
-16    -80    
-800   -32    
112    96     
-64    -112   
-176   -48    
672    -144   
-80    -240   
-16    208    
-160   32     
416    -256   
32     -208   
32     -64    
304    16     
-144   64     
-48    -592   
-384   320    
160    208    
-64    -432   
128    -48    
208    -208   
-64    -16    
-384   -1104  
-224   256    
656    -704   
-544   48     
544    256    
208    48     
-336   -272   
224    -96    
64     -16    
112    -48    
64     -16    
0      -128   
-544   112    
-16    -176   
-112   192    
672    -352   
-176   240    
-416   -1200  
912    1008   
928    -64    
-2464  -608   
1744   -96    
400    432    
-176   -16    
-224   1168   
-128   128    
112    192    
-96    -240   
784    624    
-352   816    
-240   -224   
336    -544   
64     -464   
160    80     
-704   -32    
-96    224    
-256   -16    
-32    -656   
-64    -256   
-32    336    
-48    32     
-32    -112   
-112   -608   
-112   -752   
-112   80     
-16    -544   
432    -736   
208    -64    
-32    400    
-352   352    
240    -32    
128    -448   
112    96     
-480   -368   
-48    -448   
-16    224    
-48    -1232  
-176   -1184  
160    560    
-16    -64    
-48    -528   
64     -160   
-416   -336   
-592   -144   
-816   -992   
-208   -1200  
48     496    
-272   128    
32     512    
192    -224   
112    -176   
-800   256    
800    848    
-880   720    
304    -16    
-288   128    
-144   -512   
-864   -768   
272    0      
240    640    
-128   -176   
-96    176    
-768   -64    
192    -80    
368    16     
-480   -112   
480    -464   
112    272    
144    -160   
-128   80     
-144   -160   
-32    144    
-128   32     
64     0      
-144   336    
432    64     
-640   0      
16     16     
208    48     
-240   -128   
576    336    
-1280  416    
624    -16    
-288   32     
176    112    
-288   -144   
528    48     
-848   480    
176    144    
256    -304   
-80    272    
0      -16    
-128   -32    
-224   224    
80     96     
-96    32     
-448   -448   
-48    32     
-16    -240   
128    176    
-336   976    
720    -176   
-992   0      
400    -192   
-144   368    
192    608    
-272   128    
-208   496    
96     304    
-144   -112   
48     80     
-240   144    
288    448    
-144   80     
-256   464    
80     400    
544    -176   
-704   -464   
-368   -640   
368    -208   
16     144    
-32    272    
-176   64     
-304   -112   
-112   80     
592    48     
-720   -144   
-624   -96    
736    -320   
-352   -816   
1936   -1632  
-736   -368   
144    -224   
736    384    
-48    272    
-352   688    
864    880    
128    208    
-384   -144   
64     -112   
64     144    
-80    48     
-48    112    
-880   -320   
176    -32    
48     48     
80     224    
-16    576    
-48    400    
272    128    
400    1072   
-1312  64     
-48    -48    
352    16     
-192   -544   
-32    176    
-112   32     
0      32     
-240   -128   
-192   304    
656    -48    
-288   272    
-240   -64    
32     -96    
192    176    
144    -48    
-224   16     
-160   -48    
368    32     
-112   -48    
-112   144    
-192   -272   
720    528    
80     -80    
-176   112    
-48    0      
512    -240   
-464   192    
448    -432   
128    0      
64     224    
-32    512    
-208   464    
208    160    
-64    -160   
-480   240    
-144   -240   
-16    304    
224    112    
16     48     
112    144    
-304   16     
80     224    
80     64     
-32    112    
224    48     
-48    48     
96     -192   
48     96     
-384   -1760  
-1952  -1824  
672    -16    
160    640    
-1088  -32    
256    192    
1248   80     
-928   336    
-288   32     
128    -272   
112    -176   
-224   0      
-432   128    
-112   48     
48     48     
144    -32    
-448   112    
112    80     
-96    64     
416    -320   
-976   48     
800    32     
-640   224    
416    128    
592    192    
-400   64     
-704   32     
608    240    
416    160    
-560   0      
-16    128    
544    16     
-128   176    
64     96     
-224   48     
-144   -16    
384    176    
48     -16    
-192   48     
288    -64    
-80    112    
288    96     
-416   192    
48     128    
336    336    
-320   288    
-144   -1952  
16     240    
384    -48    
-128   -32    
0      32     
160    128    
-48    432    
224    -16    
-144   1472   
-224   880    
192    400    
64     448    
-496   16     
32     -16    
256    -176   
-160   -448   
-208   16     
352    32     
16     32     
-80    80     
-16    144    
32     144    
176    -64    
-224   112    
-96    32     
112    -48    
48     32     
16     352    
128    128    
-192   -16    
192    -176   
224    1248   
272    304    
-288   -512   
-16    416    
-48    -16    
1536   2416   
512    432    
-1328  304    
544    240    
-256   -592   
176    32     
128    208    
208    528    
-32    96     
-176   -352   
672    -192   
-224   -912   
-80    48     
160    496    
400    -16    
-336   -144   
-32    32     
-80    -496   
112    0      
192    128    
256    -480   
-928   672    
1024   -448   
-672   0      
624    -464   
-80    240    
-272   -16    
-256   -464   
480    -160   
64     160    
-272   112    
80     320    
16     -80    
144    144    
-112   192    
-16    0      
80     48     
96     -112   
192    272    
64     80     
-48    80     
144    -32    
-400   0      
208    -672   
208    112    
-336   -48    
448    112    
-240   144    
64     144    
-1008  -1056  
1152   -80    
304    48     
-1136  -624   
1776   -32    
-1184  -496   
-288   80     
784    -176   
-224   -48    
0      -288   
-80    128    
224    64     
-96    64     
-112   64     
512    192    
-544   -32    
192    224    
240    400    
-352   224    
352    144    
80     -336   
-320   208    
496    928    
1376   0      
-368   368    
-352   592    
112    336    
528    -64    
-256   16     
288    128    
-288   80     
112    -384   
128    80     
0      -64    
48     32     
240    -384   
-48    128    
48     -32    
-48    -80    
-80    -400   
400    16     
144    -208   
-16    208    
192    272    
176    368    
-368   -160   
304    -688   
160    688    
-656   -256   
-64    0      
592    448    
-528   256    
176    96     
208    -32    
0      240    
-800   -16    
480    16     
112    480    
-32    0      
16     -1008  
-208   -928   
208    -160   
320    -80    
-128   0      
-160   -240   
192    -160   
-192   -912   
112    -656   
-208   192    
-400   144    
624    -624   
-256   -592   
768    -2368  
-192   416    
384    416    
-736   -1088  
80     240    
672    624    
160    240    
-288   -1408  
-192   256    
208    -2592  
480    464    
160    352    
-160   -528   
-48    336    
464    -208   
-64    -1120  
-192   512    
-160   -64    
288    272    
-400   -160   
-16    -176   
160    -112   
-304   -112   
0      208    
224    -336   
-80    -144   
0      -160   
-48    -128   
-16    64     
144    -416   
-48    192    
32     -144   
-64    48     
-48    -80    
-160   96     
32     304    
16     -320   
208    -1392  
-304   -160   
-16    128    
240    224    
176    -1072  
80     272    
0      -272   
-80    -80    
144    -32    
-80    -176   
0      -160   
208    544    
-160   -240   
272    -128   
128    -544   
-800   -272   
176    -1232  
-272   -1600  
-208   48     
288    -176   
112    1824   
384    -256   
240    -304   
-240   -208   
-208   -336   
-112   128    
480    192    
80     -64    
0      96     
-576   208    
-80    -240   
384    0      
-160   -336   
-112   -64    
-80    -368   
112    0      
-32    -1904  
-144   -144   
400    -800   
384    -496   
-176   -288   
-320   -176   
-96    96     
864    976    
-1392  496    
592    -368   
-1120  544    
112    32     
320    -224   
512    -96    
-256   544    
-48    -848   
640    -528   
112    64     
-80    0      
-64    256    
32     16     
-128   -48    
144    -240   
-336   -144   
-144   -128   
112    -176   
128    -240   
-224   -336   
192    -800   
-304   400    
320    -672   
128    -192   
96     -240   
-272   -112   
112    288    
224    96     
-48    -416   
-64    48     
-352   400    
128    752    
-896   -272   
48     -288   
-16    128    
-80    -304   
64     512    
256    -864   
-128   -128   
-352   160    
272    96     
-96    96     
80     -192   
-304   224    
304    128    
-16    96     
16     -48    
-160   -64    
-272   -512   
1008   -592   
-512   -656   
-368   -160   
720    336    
-1328  -336   
-32    -272   
272    -560   
-480   -128   
176    48     
-192   224    
336    112    
-224   16     
-80    -16    
144    240    
112    16     
-272   208    
-32    -304   
64     -256   
-64    -128   
0      16     
-48    192    
-80    768    
1296   -240   
-1408  160    
416    -48    
112    -112   
-336   80     
96     -416   
-32    240    
-144   48     
-192   64     
80     -240   
96     32     
-160   -64    
-160   192    
288    -16    
-160   -48    
464    32     
-368   96     
240    -16    
-224   32     
-96    160    
-400   -384   
720    -176   
-288   400    
-512   416    
-416   -80    
144    -192   
576    480    
128    80     
-48    112    
320    80     
80     240    
-256   496    
-480   0      
-208   -128   
272    -144   
112    -80    
-464   -288   
-240   -128   
288    80     
32     32     
176    -16    
-224   256    
-320   -64    
-400   -336   
672    96     
-432   272    
-64    -48    
480    1136   
-768   -3200  
-1936  -752   
1424   -1008  
-1184  304    
624    336    
368    128    
-384   128    
-16    304    
144    224    
-112   -208   
-384   32     
208    16     
-288   128    
64     288    
-240   -128   
-112   -32    
80     80     
-624   0      
192    -400   
896    16     
-192   -176   
-224   48     
0      144    
-848   -240   
608    32     
384    32     
-512   192    
192    64     
-320   192    
400    48     
-352   80     
336    32     
-416   80     
368    336    
-816   -288   
0      96     
160    48     
32     64     
0      0      
-320   64     
272    -64    
-416   -144   
272    96     
32     272    
-304   80     
-64    80     
416    -528   
-1024  -368   
416    96     
-400   192    
448    128    
0      -304   
272    80     
64     -16    
-224   96     
448    -48    
-224   32     
-16    384    
-224   352    
304    192    
64     144    
144    96     
-176   -64    
-224   64     
240    32     
176    144    
96     224    
-320   384    
416    176    
-368   -128   
-128   128    
128    -48    
64     -80    
-32    16     
32     96     
-32    -80    
112    -64    
-272   0      
144    48     
-128   -304   
-32    64     
256    2272   
1616   -608   
-2016  288    
560    -192   
384    144    
-448   -32    
144    -80    
-176   272    
144    -480   
-48    -144   
240    224    
-320   -96    
-16    -16    
80     -240   
272    80     
-144   272    
64     -224   
-176   16     
128    112    
192    64     
560    1056   
-1488  96     
688    192    
576    592    
-448   -64    
336    176    
-400   80     
80     -240   
0      -112   
336    16     
-96    48     
-320   192    
288    160    
0      176    
-224   144    
144    -160   
-48    128    
-208   -96    
144    96     
304    224    
-224   176    
-384   576    
352    80     
-160   0      
304    -272   
-208   64     
96     96     
-32    176    
-192   -272   
160    -704   
-304   1648   
1616   -128   
-816   -112   
208    -224   
0      -80    
-208   -2880  
480    -320   
-64    -416   
-112   -240   
208    -32    
48     32     
32     48     
-144   112    
0      112    
256    208    
-64    96     
-64    -240   
304    -304   
64     -256   
-96    -96    
-160   -880   
1040   272    
-1712  128    
928    512    
576    208    
-880   -272   
784    -256   
-480   32     
224    336    
32     -16    
-336   80     
336    64     
-48    144    
-80    112    
16     -208   
-224   -720   
208    224    
272    512    
-272   560    
-128   144    
32     160    
176    64     
96     240    
816    608    
304    64     
-560   -304   
352    656    
-448   16     
-192   -32    
336    -48    
112    -352   
-32    -320   
-176   -1200  
64     144    
-496   -288   
48     -976   
288    80     
-400   112    
80     -16    
320    432    
144    192    
-48    288    
64     16     
-192   80     
96     32     
-144   -480   
-304   -240   
416    432    
112    320    
-112   224    
-448   -720   
1248   -1952  
576    0      
352    112    
-784   -368   
-48    -1216  
96     768    
528    1744   
-64    -208   
-160   0      
-16    352    
-16    -256   
576    -208   
144    -48    
-528   -832   
-320   -688   
544    240    
320    80     
-96    -288   
-384   -464   
128    432    
384    656    
-48    -496   
-192   -48    
416    464    
-416   -272   
368    -256   
-112   288    
48     1888   
144    -976   
-48    -368   
464    240    
-240   512    
-64    544    
400    -16    
-96    -800   
80     176    
336    464    
-224   -144   
-32    -192   
272    -176   
-80    288    
112    144    
-352   -224   
128    -208   
192    128    
16     496    
48     -528   
-32    48     
496    32     
-352   -16    
-16    -928   
-560   160    
528    -992   
80     -208   
-32    -464   
-288   96     
-192   -1504  
192    -656   
432    1520   
-240   672    
32     -80    
208    304    
-224   -112   
96     128    
192    816    
304    -96    
-144   304    
-304   -480   
112    624    
16     64     
256    -480   
48     -160   
-464   -16    
96     -352   
-128   -48    
192    -992   
96     -2864  
-320   480    
-96    160    
80     64     
624    1232   
720    -656   
-336   -432   
-656   -1040  
880    992    
-160   64     
-192   160    
496    496    
-96    -64    
336    -400   
-48    176    
-112   -416   
-48    80     
368    -464   
240    -176   
-1120  -32    
176    -176   
224    -80    
192    -240   
-80    -80    
176    -224   
-240   256    
288    16     
240    32     
-144   -48    
64     -32    
-96    80     
176    112    
-288   -112   
-16    64     
-352   -48    
-48    -80    
-128   -272   
384    -208   
-176   48     
-80    816    
368    -32    
256    -192   
-304   80     
256    -48    
240    176    
-192   -96    
48     -144   
-16    48     
416    -96    
-656   -112   
208    -128   
-128   16     
112    -432   
576    1216   
1088   -480   
-2960  816    
1600   -1264  
448    64     
-1376  -144   
704    -64    
496    336    
-240   -176   
-208   48     
272    -160   
-640   64     
240    -16    
-672   -80    
224    -80    
-288   -80    
320    -48    
-352   -112   
-16    -848   
112    64     
-288   -80    
128    32     
704    592    
688    -96    
-704   160    
528    -464   
-336   -32    
400    -80    
-160   256    
-96    128    
-80    144    
-192   -384   
240    160    
176    -496   
-96    16     
112    -336   
96     80     
0      256    
-240   -288   
32     80     
448    96     
-400   -64    
432    784    
-432   -272   
-912   -704   
-16    16     
1056   416    
-96    176    
-352   -32    
448    -16    
128    -592   
-368   -96    
-304   16     
176    0      
560    -16    
32     -80    
-912   -112   
-128   -560   
352    -176   
272    -80    
-768   16     
-272   -64    
992    64     
-384   -416   
-400   32     
-304   -720   
368    512    
752    -256   
-464   336    
544    -128   
576    1152   
-2896  2576   
992    800    
80     1120   
-240   64     
-48    64     
64     272    
-192   112    
96     0      
-224   32     
320    176    
96     112    
-112   96     
224    -160   
-336   16     
304    -208   
96     80     
384    0      
-576   32     
384    -16    
352    -576   
-1216  -32    
832    -16    
-992   0      
592    176    
-64    -48    
-736   160    
656    0      
-256   256    
-288   -64    
16     400    
288    16     
-160   240    
160    -192   
-1120  -352   
-48    -128   
0      112    
176    112    
-416   -112   
368    -32    
0      96     
-16    32     
-128   32     
-112   96     
272    -160   
-976   -96    
32     80     
224    224    
-144   64     
-240   192    
368    288    
-176   192    
112    400    
48     -352   
-432   128    
464    -128   
-224   112    
48     256    
48     -32    
-208   -32    
96     112    
144    176    
-352   -112   
-160   -16    
-16    -112   
-80    -224   
80     -64    
64     240    
-128   256    
256    368    
-368   352    
80     -32    
-64    96     
-64    96     
112    240    
-208   -96    
-144   -320   
-208   -144   
240    304    
-272   464    
16     416    
-80    -128   
-768   -816   
1792   -880   
-672   336    
-1488  368    
1408   608    
656    304    
-1040  528    
-64    96     
528    112    
48     -176   
-320   0      
144    48     
-336   -144   
144    -160   
128    -32    
208    912    
-336   768    
48     512    
48     304    
-176   0      
160    656    
-848   -400   
1040   64     
-160   544    
-288   -224   
-112   0      
128    288    
192    -496   
-288   400    
240    -384   
-176   112    
80     224    
-96    16     
0      96     
-80    16     
32     -144   
272    -48    
-96    320    
96     -576   
-112   624    
-16    224    
-112   192    
112    32     
96     -128   
-80    80     
-304   -272   
112    272    
208    416    
32     -48    
-192   192    
352    -128   
-2720  -448   
1376   704    
-176   144    
-576   480    
416    -336   
304    96     
-1056  -1072  
256    -304   
352    896    
-80    288    
-208   -160   
-16    -16    
160    144    
-128   128    
32     64     
-176   128    
96     32     
128    96     
-16    32     
-224   128    
192    576    
2128   -112   
-2064  752    
560    256    
752    1056   
-720   1072   
-48    304    
272    208    
-112   -256   
-208   -64    
496    112    
64     288    
-48    192    
-80    592    
80     176    
32     -64    
-112   320    
624    1376   
-464   1216   
96     80     
368    -160   
48     -224   
-320   192    
544    -352   
-672   -1232  
32     -400   
928    880    
-352   -208   
48     400    
80     576    
-208   384    
32     -416   
-352   80     
544    80     
-592   -144   
208    240    
512    96     
-336   1408   
848    496    
-496   144    
-80    304    
208    352    
-96    656    
336    112    
-288   -80    
160    48     
272    352    
-96    32     
-16    224    
16     16     
-1056  272    
1024   112    
-640   448    
-1152  -528   
864    -192   
-16    -1072  
-448   -720   
-640   192    
16     -176   
272    576    
16     -480   
-416   416    
192    208    
128    0      
304    256    
80     -224   
-128   -176   
192    144    
320    752    
-144   720    
-48    -128   
80     -96    
336    80     
-832   352    
736    -144   
-64    -720   
-16    800    
448    1968   
-48    1152   
400    128    
-80    -288   
-160   -160   
-160   -320   
96     176    
-32    496    
160    272    
-384   -496   
-576   208    
336    288    
-160   64     
-16    -384   
96     960    
-112   384    
256    -720   
-192   -112   
416    816    
-688   -432   
64     224    
352    448    
-128   -272   
-272   -1104  
416    -800   
-848   -240   
336    -1360  
704    -800   
112    -176   
-224   848    
144    -592   
208    -576   
-352   -944   
-352   176    
80     -80    
96     -592   
-192   176    
192    432    
-64    512    
256    192    
96     32     
-32    240    
-96    864    
352    496    
-80    208    
-16    320    
192    288    
64     64     
-16    128    
128    896    
288    640    
-144   96     
-96    208    
-64    336    
-160   -2256  
-464   384    
816    0      
-512   -320   
64     -304   
-192   -64    
544    -192   
-448   304    
0      336    
-96    96     
-16    -448   
80     -48    
96     -384   
-160   352    
-48    64     
176    -176   
16     -16    
-112   32     
224    160    
-400   -416   
352    -1056  
-496   384    
1072   192    
-416   32     
-272   240    
336    -112   
-160   416    
528    32     
-608   224    
224    32     
-144   48     
288    16     
-48    64     
32     16     
-176   32     
224    112    
240    -944   
-96    272    
80     -16    
-208   208    
480    32     
-192   112    
480    160    
-416   0      
80     320    
-112   -224   
400    96     
-32    -368   
-176   0      
224    -2320  
-1840  -832   
2016   -464   
-672   160    
-528   -256   
144    0      
624    -224   
-224   -128   
64     96     
16     112    
288    -64    
32     16     
-48    80     
160    -96    
-368   16     
416    -160   
-64    64     
-32    -16    
144    144    
80     -736   
80     160    
464    976    
-784   -512   
-640   80     
944    384    
640    32     
-368   112    
-64    -1904  
16     496    
-16    -16    
224    -272   
16     32     
16     64     
-160   176    
176    -16    
400    160    
-352   144    
16     -688   
-144   -96    
672    112    
-480   -1056  
-304   -64    
208    -1008  
592    -352   
-320   -320   
80     320    
16     -48    
-208   192    
-672   608    
-672   -672   
688    -544   
672    -48    
-800   -48    
-304   -32    
-176   -32    
672    -272   
-496   336    
-496   176    
-320   -64    
320    208    
-144   -48    
-64    -832   
32     -240   
-144   -384   
176    96     
224    160    
-208   320    
192    -224   
0      -32    
-112   0      
-944   -1328  
2000   -2928  
-512   1184   
256    608    
608    -80    
-944   96     
160    -720   
1152   320    
-880   32     
-144   -96    
-96    -80    
240    96     
-96    -96    
176    -32    
16     -96    
-256   80     
-64    -64    
-160   -112   
-208   -112   
-272   -752   
368    -272   
-336   48     
32     48     
528    -1504  
128    48     
-288   -48    
64     112    
-96    -96    
48     -48    
96     -176   
-144   -16    
-352   -144   
64     208    
-1344  -176   
288    -144   
240    -416   
-176   -416   
-128   -16    
80     -432   
192    160    
16     48     
-112   256    
112    272    
0      192    
208    320    
48     -80    
-112   -16    
16     -304   
-224   -176   
208    -80    
-352   224    
-48    192    
384    912    
368    -832   
-272   -592   
-48    -2512  
-256   -400   
320    96     
-64    240    
-16    32     
176    352    
-304   320    
-144   480    
400    -32    
-528   -16    
-272   304    
-16    -560   
304    -144   
-128   -464   
-48    352    
48     -1856  
0      -304   
-256   -288   
48     -144   
160    272    
16     368    
-32    448    
-160   656    
128    -512   
-64    -480   
96     -112   
96     256    
-128   -1376  
-80    0      
1184   240    
-800   480    
272    -608   
160    80     
112    -464   
-32    112    
160    128    
-240   320    
128    32     
192    208    
48     176    
-48    112    
176    240    
304    80     
-96    352    
0      -48    
160    208    
-496   -192   
768    -272   
-416   16     
160    240    
-48    496    
-384   304    
224    480    
-272   512    
192    368    
48     80     
-1040  -320   
80     -64    
-848   -224   
304    -160   
-80    272    
-352   -16    
-144   -64    
32     -16    
-160   -192   
-32    192    
-320   -48    
128    176    
-144   112    
-592   -112   
48     -304   
320    -400   
0      240    
-208   224    
-272   144    
-80    -112   
880    1296   
-688   912    
-1792  -672   
2400   128    
-928   480    
-320   -16    
304    112    
-352   -336   
-128   1120   
304    144    
-16    -816   
-80    -96    
96     0      
0      176    
-304   -112   
-64    0      
192    64     
-208   -256   
-160   32     
-80    64     
16     -80    
-992   608    
1936   -400   
-1152  656    
832    224    
-512   -368   
320    -32    
-608   -976   
-32    -1648  
208    -608   
-192   608    
320    176    
-112   320    
0      704    
336    880    
-544   -96    
-80    -80    
320    640    
112    1168   
256    1328   
-32    16     
16     128    
-176   -336   
96     -128   
416    1024   
544    352    
-832   -1040  
-288   -816   
176    -560   
-448   -224   
160    -560   
64     224    
-160   -96    
-640   208    
-112   -304   
512    -80    
16     -16    
-64    384    
0      -432   
-16    -112   
-80    -176   
-400   0      
176    -16    
-240   128    
400    16     
80     384    
-928   288    
128    48     
-688   448    
608    352    
-592   -624   
928    304    
320    -32    
-1136  16     
-112   400    
1040   96     
-64    -416   
96     -144   
-240   320    
-272   -720   
352    48     
-80    624    
96     144    
-368   -368   
96     160    
288    112    
-176   288    
-400   16     
-144   80     
608    368    
-112   -48    
-160   -128   
32     32     
-416   176    
-608   -368   
1040   64     
-944   336    
80     -16    
-64    64     
528    -80    
-176   272    
-240   352    
304    -48    
-272   272    
-48    64     
-224   -48    
304    -240   
128    176    
-224   176    
-32    48     
-64    608    
544    512    
-176   352    
-400   80     
-80    368    
160    352    
48     0      
-64    624    
528    304    
-80    128    
-224   -192   
96     -48    
192    -560   
-1104  -288   
32     -80    
688    48     
-192   208    
128    192    
-176   736    
432    336    
48     -48    
256    -64    
48     192    
-512   -128   
48     -32    
320    80     
-80    -80    
-160   240    
288    336    
-192   -272   
0      -64    
-96    112    
112    -160   
-288   -208   
272    176    
-48    96     
112    176    
112    128    
-384   -80    
176    144    
160    64     
1344   832    
-3376  1120   
784    -112   
720    -368   
-384   -16    
160    -336   
-320   240    
176    -64    
160    -736   
-64    512    
64     -128   
-480   288    
432    160    
-16    352    
-64    -64    
192    496    
-592   -80    
144    64     
304    64     
-240   -64    
-272   -560   
640    -736   
-784   608    
928    128    
-64    96     
-544   -32    
448    -80    
-32    480    
448    -16    
-800   272    
192    -48    
-48    96     
224    -16    
64     112    
112    -128   
-432   384    
112    -48    
80     160    
-80    -96    
96     112    
48     80     
-384   112    
224    80     
-32    32     
-32    384    
464    80     
-384   64     
432    0      
-352   -192   
96     -240   
432    3744   
1344   -1312  
-1520  288    
480    -368   
-464   112    
656    160    
16     32     
-176   256    
480    80     
-592   176    
400    112    
80     16     
96     128    
-176   -192   
-192   -96    
208    64     
-192   -80    
240    48     
144    112    
-128   32     
-64    112    
-272   -656   
384    448    
-320   16     
-464   224    
1488   448    
-976   96     
0      128    
112    208    
528    -48    
-224   112    
-96    -400   
336    64     
-80    -768   
64     80     
-192   80     
144    48     
112    384    
-112   208    
96     -736   
32     48     
-32    -16    
-112   384    
992    -416   
-800   96     
464    16     
96     -480   
96     640    
-592   -416   
-288   144    
672    -544   
16     128    
-304   96     
128    96     
448    288    
-320   352    
-240   -96    
-96    48     
144    464    
688    -352   
-448   144    
-224   -16    
224    80     
144    -80    
0      96     
144    320    
-336   400    
416    16     
160    160    
-432   0      
2608   3968   
-1648  3136   
-80    -1152  
1760   -512   
-800   -32    
0      16     
48     80     
752    240    
224    -528   
-688   -32    
368    -928   
-16    32     
256    192    
256    80     
-304   80     
-96    256    
416    32     
-96    -144   
-256   32     
-336   432    
912    1424   
-224   1344   
112    256    
176    -272   
-320   -64    
304    640    
480    128    
-736   -48    
176    -128   
432    144    
128    176    
-608   0      
48     96     
1008   192    
-688   -192   
80     -48    
144    352    
416    256    
-32    208    
64     224    
-48    80     
-16    176    
432    240    
-256   32     
176    80     
528    -240   
-432   -784   
32     16     
-80    -2416  
96     -480   
400    -480   
-384   -816   
224    -112   
-80    144    
192    144    
-64    128    
-272   -2576  
-224   32     
432    -80    
160    944    
-336   -688   
-320   -832   
208    112    
-112   -688   
224    -160   
128    416    
-288   -64    
240    -128   
-48    160    
144    -1680  
112    304    
-32    -112   
-128   160    
240    -64    
320    256    
-592   -64    
-32    -400   
240    -592   
-576   -1312  
288    -128   
160    -16    
80     112    
-96    -1696  
448    -32    
-528   -48    
-32    0      
16     32     
0      0      
208    -176   
224    32     
-272   -272   
-32    -128   
-1008  48     
192    -112   
-64    -32    
-64    176    
192    -144   
112    -768   
176    -48    
-64    64     
-208   192    
-288   -560   
1216   -720   
-288   416    
288    -16    
-752   640    
368    -224   
-48    -112   
-48    304    
240    -240   
-512   -128   
208    -336   
560    64     
80     48     
-192   -320   
48     -16    
16     -32    
-32    -32    
112    -160   
80     160    
-96    0      
-160   -16    
320    -144   
64     -256   
-432   112    
528    0      
-752   -256   
-64    -32    
-96    144    
-224   -1648  
320    -368   
64     32     
1392   656    
-2416  1168   
1552   384    
-64    384    
-640   -80    
208    48     
48     -816   
560    -208   
128    1280   
-1024  464    
128    -608   
352    368    
-96    -144   
-64    320    
160    240    
-48    -64    
16     384    
-96    -272   
-128   208    
112    -112   
-800   -256   
1120   -464   
-256   -240   
-624   176    
1008   1616   
624    -288   
-352   -512   
-320   608    
848    848    
-256   -592   
96     -240   
64     -272   
-80    -496   
-480   -304   
304    -64    
-192   144    
288    96     
-96    80     
-288   -336   
352    112    
80     -64    
0      208    
-272   32     
192    -544   
448    -1536  
-608   -176   
560    800    
-688   512    
-128   224    
432    784    
320    -16    
-208   -224   
-272   -224   
-176   -304   
496    64     
-160   -160   
-896   384    
-608   -128   
-720   224    
448    -144   
-432   64     
-288   32     
112    384    
480    -176   
-48    -80    
-464   -112   
-96    96     
176    64     
-608   -560   
128    -800   
272    1648   
-48    -352   
-1264  -352   
224    112    
560    336    
-592   800    
208    -112   
-304   352    
-208   -352   
432    656    
-80    -288   
-256   160    
112    80     
-176   16     
320    144    
80     -144   
-256   224    
368    -16    
-144   1744   
688    1200   
-544   288    
-160   -464   
128    112    
-512   0      
-368   112    
224    -272   
-400   -320   
304    -112   
-832   -80    
608    208    
-416   -64    
144    384    
-208   176    
96     -160   
16     -48    
48     -96    
-720   -48    
288    144    
16     128    
-160   32     
-176   80     
160    0      
-368   -80    
448    -64    
224    144    
-336   16     
-96    80     
128    160    
32     -144   
64     -96    
-448   144    
96     -80    
384    -352   
-480   384    
-384   16     
256    -400   
-464   -80    
192    32     
-80    -368   
96     -144   
-128   -16    
0      -112   
80     48     
48     0      
-176   48     
-160   -80    
304    176    
192    80     
-352   -352   
-160   128    
48     224    
-64    -144   
-96    112    
0      -112   
0      224    
-160   -64    
64     80     
240    16     
-256   0      
-32    144    
-80    224    
704    -2336  
-1856  512    
1712   512    
-768   -832   
-720   656    
640    -160   
-16    416    
-144   -480   
-224   -64    
128    176    
176    -32    
64     176    
-144   32     
-112   -576   
-144   240    
352    176    
-272   0      
48     144    
0      16     
48     208    
-32    1136   
1040   -240   
-1520  -560   
272    336    
528    112    
-608   32     
176    -16    
-96    80     
144    -112   
-288   144    
448    -48    
16     160    
-208   16     
-32    48     
48     16     
-544   208    
752    80     
-528   -32    
208    -64    
-368   48     
480    32     
-256   96     
288    64     
-80    -32    
-352   128    
640    144    
-448   32     
240    -16    
-144   0      
-64    -1392  
-2080  -688   
2112   224    
-1024  -224   
304    368    
-176   -176   
208    -80    
-592   -336   
96     144    
624    -96    
-160   112    
-176   -16    
-160   128    
144    128    
-64    192    
-16    256    
-96    -64    
-64    192    
96     -64    
-96    -16    
-112   32     
80     -80    
720    96     
-1312  208    
848    -304   
-192   320    
-320   96     
272    -16    
-304   -416   
304    -176   
64     336    
-336   -80    
112    176    
112    80     
48     32     
-272   192    
320    -16    
-64    416    
144    240    
-272   -144   
-80    64     
192    240    
-256   -112   
-96    128    
384    -80    
-656   224    
256    -48    
320    432    
448    -176   
-464   208    
224    208    
48     64     
-128   64     
-32    112    
208    288    
-208   144    
128    -144   
16     -48    
432    32     
-608   -128   
336    144    
224    160    
-384   96     
16     112    
48     0      
208    -128   
128    48     
-176   112    
16     0      
48     96     
144    -976   
-1424  928    
1504   1264   
-1504  176    
-96    -80    
1696   128    
-464   -208   
-608   208    
112    -112   
160    -96    
320    64     
-16    96     
-368   80     
176    112    
144    -128   
-144   -32    
-256   160    
-64    -112   
384    176    
-112   -432   
-352   -688   
224    -672   
-192   -1264  
32     336    
832    368    
-336   656    
32     128    
176    128    
16     80     
-512   -64    
64     -528   
432    16     
48     1024   
-272   176    
-176   -64    
320    -256   
-320   32     
592    704    
48     544    
-272   -96    
320    -496   
-32    -192   
32     64     
-224   -144   
448    176    
64     272    
-96    1168   
448    16     
-848   -1184  
272    -176   
480    576    
0      304    
-352   -1184  
320    -256   
-272   -2768  
-368   -1152  
736    272    
-176   400    
32     0      
112    160    
-48    112    
80     368    
0      -176   
-48    -128   
128    352    
80     -16    
-16    -96    
320    -496   
400    208    
-128   96     
32     80     
-32    240    
160    -16    
-32    224    
96     48     
-64    96     
96     96     
80     32     
48     176    
80     64     
64     -192   
80     144    
240    -784   
-816   448    
352    -16    
-288   256    
240    -592   
-176   -256   
208    -352   
-160   528    
176    48     
16     48     
192    16     
-288   -112   
32     240    
-192   -128   
416    -144   
-384   -144   
-48    432    
240    -368   
160    80     
96     -496   
-336   944    
784    -320   
-928   80     
480    -240   
0      0      
144    112    
-64    -400   
-272   -320   
-48    48     
-96    352    
256    -288   
288    -144   
-144   -16    
0      528    
16     -80    
32     -208   
-224   -528   
-80    -48    
224    192    
16     -32    
48     240    
-272   16     
192    272    
16     224    
272    -112   
-496   -144   
-32    400    
-48    48     
720    -192   
-32    -400   
1056   -624   
-1440  32     
1376   -1168  
-400   -496   
-800   -1136  
-64    -432   
112    -800   
208    176    
400    1600   
-320   400    
96     -640   
512    -480   
-176   416    
-128   384    
64     -80    
64     -1616  
240    480    
48     -240   
-80    448    
-80    -48    
-384   -944   
480    -384   
400    -1024  
-1200  -784   
800    -240   
272    1136   
656    1232   
-432   320    
384    272    
144    16     
-192   -192   
-16    -32    
240    128    
256    224    
-832   -144   
448    -544   
-240   -464   
352    -432   
32     -192   
128    48     
-64    -32    
-288   -1056  
-96    -416   
464    -480   
704    480    
-128   224    
160    -224   
96     64     
-176   -480   
496    -288   
-64    112    
-1056  -112   
0      208    
-96    48     
480    16     
-528   -64    
704    -384   
96     192    
-32    -208   
416    144    
192    16     
-624   192    
256    400    
-176   -208   
160    288    
-240   -128   
-480   64     
384    -112   
640    864    
-1808  -1280  
1456   -2304  
400    -448   
64     144    
-784   -1408  
-240   192    
624    -576   
-128   288    
-160   -224   
-224   96     
-208   -192   
176    128    
80     -208   
-240   -16    
-1696  -176   
320    96     
224    -96    
-80    -208   
-64    32     
-464   -1072  
688    144    
-528   64     
144    -288   
176    80     
-368   -80    
-112   -432   
-304   -176   
272    -240   
16     -16    
-64    176    
16     160    
-224   288    
16     -160   
80     320    
-64    -304   
-320   -32    
448    144    
-208   544    
80     544    
48     64     
144    16     
-448   -208   
256    144    
208    -112   
176    176    
304    -80    
-672   192    
64     96     
64     448    
464    272    
-320   192    
-208   -416   
128    -784   
80     -160   
80     -256   
-1392  144    
1184   -128   
-384   -480   
-144   -400   
-96    -96    
-112   -368   
208    80     
-48    -144   
112    112    
-32    -192   
80     -80    
-256   -240   
-144   -208   
80     -48    
160    -208   
-208   -64    
16     -16    
-128   -64    
128    0      
-96    -128   
-80    0      
400    160    
-176   64     
384    192    
-560   -80    
128    48     
848    -736   
-2896  2048   
1472   112    
-448   -64    
32     96     
48     -256   
-704   16     
128    -432   
96     -224   
-48    144    
-304   224    
-128   -224   
-48    112    
112    -80    
-512   -96    
176    336    
160    112    
-256   -160   
-176   32     
-48    48     
-144   -448   
208    -736   
-736   416    
1024   64     
-208   -32    
-512   272    
304    -320   
16     -240   
240    -112   
-128   288    
-368   176    
48     -32    
368    -176   
-272   0      
-272   304    
-112   96     
-160   48     
176    160    
240    32     
-544   32     
608    16     
-288   32     
144    80     
48     144    
-80    -208   
0      64     
-16    -80    
-144   176    
192    48     
-288   -288   
-704   -2288  
768    64     
-560   -320   
-1136  96     
656    240    
208    -48    
-544   192    
192    -160   
16     -48    
-416   -96    
288    96     
0      -32    
112    144    
-144   -176   
-208   64     
80     -240   
-416   48     
-784   -336   
48     -160   
0      -192   
64     224    
32     -464   
-1152  944    
1008   -80    
-352   80     
-144   240    
288    -64    
-208   128    
-480   512    
-64    -192   
128    -48    
160    112    
-224   -80    
-112   208    
-304   -144   
224    16     
-304   -208   
-96    -160   
96     16     
32     336    
-176   -256   
-64    -272   
928    576    
-608   288    
-128   -288   
336    480    
-80    32     
-352   -64    
256    48     
-272   -80    
-48    112    
-96    32     
224    144    
-112   176    
-144   -48    
16     -320   
496    -64    
96     -80    
-368   64     
816    288    
-832   240    
112    0      
-160   16     
80     16     
-176   -48    
-176   96     
464    -240   
-272   96     
176    -192   
560    0      
-912   -160   
1376   128    
272    -592   
-1536  -16    
192    176    
784    -32    
-480   -256   
256    -1104  
352    1104   
240    544    
-656   240    
288    144    
-32    112    
-16    144    
176    272    
224    336    
-480   672    
144    -368   
560    -48    
-224   704    
-128   432    
48     80     
48     -400   
192    -272   
-128   -1120  
-64    -816   
128    -96    
-128   576    
0      416    
-160   560    
192    288    
0      -384   
-112   -224   
-176   256    
176    304    
-32    -48    
112    64     
-224   64     
256    960    
-272   544    
192    96     
32     64     
-320   32     
16     592    
16     912    
400    192    
0      -128   
-288   192    
96     832    
-192   -192   
224    848    
-224   -208   
320    848    
-32    336    
-208   -16    
80     -144   
336    -32    
544    592    
-448   608    
256    -704   
96     -512   
-16    112    
80     304    
-16    96     
-48    176    
0      -64    
-240   -96    
-128   16     
176    -272   
176    16     
64     192    
160    16     
-224   80     
160    0      
-128   16     
192    48     
-80    48     
-240   -80    
272    -368   
352    272    
-128   64     
48     64     
-528   816    
960    -288   
-736   160    
192    -16    
208    -32    
-272   464    
480    240    
-144   96     
-32    -64    
128    32     
160    144    
-64    32     
96     16     
112    96     
16     64     
96     -144   
0      -736   
304    -576   
32     0      
16     272    
128    -288   
160    96     
432    352    
-144   560    
-224   96     
-176   336    
288    464    
544    -176   
-384   128    
-320   336    
368    112    
-112   -256   
80     80     
208    0      
-176   272    
-256   128    
16     -304   
496    -336   
224    1152   
-528   784    
-288   -800   
608    144    
48     448    
-208   -144   
-384   -320   
400    272    
240    -608   
112    128    
-32    208    
1184   400    
-2592  464    
32     96     
912    224    
480    -800   
-576   624    
1024   176    
-880   -560   
64     240    
624    304    
-144   -256   
-96    -96    
96     -176   
16     -112   
-192   -1024  
128    -16    
16     48     
96     528    
-16    -144   
32     144    
-160   -96    
-624   -576   
1344   -496   
-176   -112   
-880   256    
816    256    
-160   -208   
-592   -240   
400    0      
-352   -240   
144    48     
224    -720   
32     112    
48     304    
-432   128    
-112   48     
496    112    
-48    256    
-528   64     
32     16     
224    -192   
96     -208   
528    352    
48     48     
48     -192   
112    480    
-112   -272   
32     160    
272    240    
784    128    
-576   0      
-112   48     
96     272    
-80    48     
0      -16    
144    0      
80     16     
176    448    
-272   64     
528    -576   
-80    112    
-144   -16    
-96    128    
80     48     
112    80     
432    912    
-720   -112   
-528   224    
1184   160    
-608   -416   
96     -3264  
1344   -3120  
848    816    
-96    704    
-784   -144   
192    -80    
352    -80    
432    160    
-352   80     
-48    384    
-96    -64    
512    256    
192    128    
32     -32    
96     32     
-64    80     
272    64     
64     -80    
-48    32     
-192   -576   
-624   32     
832    -192   
-624   256    
992    32     
112    -272   
-272   -48    
-800   160    
1200   -880   
-880   -112   
304    -1312  
-64    -192   
-64    256    
96     -192   
16     0      
272    -400   
-832   -160   
608    -96    
240    96     
-288   16     
-240   -48    
80     192    
-240   -16    
320    -224   
-304   -128   
256    -992   
32     -272   
96     -512   
-48    -176   
96     32     
-96    64     
432    -304   
-176   128    
-160   -1168  
-656   64     
736    -176   
-368   496    
224    240    
-96    -192   
0      -336   
80     -416   
240    -208   
48     -32    
-240   -160   
240    -1360  
368    16     
-64    -336   
-576   -272   
304    -1088  
-80    288    
160    544    
528    -352   
-752   0      
112    128    
-336   -80    
64     -160   
-208   16     
240    48     
-352   32     
272    -1056  
-32    -48    
16     288    
512    1664   
-896   -2096  
-1104  496    
1776   -912   
-928   -288   
-96    -16    
-32    144    
608    624    
336    -192   
-368   -160   
-16    -64    
-32    -112   
416    -32    
-96    -80    
144    -1808  
-256   672    
256    -416   
-96    -112   
-48    240    
96     256    
-80    64     
304    1312   
208    -448   
-944   -256   
-1184  -192   
80     -96    
256    0      
80     -16    
48     448    
-368   -464   
0      80     
304    -304   
304    -160   
-272   112    
-160   96     
144    32     
256    -176   
-464   -80    
272    -64    
-752   112    
272    -80    
176    0      
0      -304   
-80    112    
224    -1008  
-176   80     
0      144    
256    64     
0      -16    
-176   -368   
1632   768    
-1600  496    
192    -288   
448    -192   
-704   64     
304    160    
496    592    
-240   368    
-32    384    
-112   -640   
128    0      
112    -160   
304    80     
-544   -32    
0      80     
64     272    
-48    0      
-288   -32    
-32    16     
256    0      
-48    -208   
416    1232   
-1008  -880   
-672   80     
1744   -192   
-896   96     
-80    400    
80     -240   
-528   128    
560    336    
-624   176    
192    -48    
-48    32     
-48    -240   
-64    -16    
144    -32    
128    64     
-480   160    
208    144    
-1008  -112   
-768   -512   
-160   -112   
-960   144    
-304   1072   
352    -496   
-192   192    
688    176    
-784   -768   
-368   -64    
688    320    
-912   -176   
-112   208    
-96    -96    
-144   144    
-512   -736   
-400   -224   
496    160    
-560   -304   
416    0      
-272   464    
-912   384    
-560   16     
112    -32    
-64    160    
-192   32     
-128   144    
-224   112    
-64    160    
176    288    
-512   576    
272    240    
1264   1088   
-2672  16     
368    752    
1056   -816   
-960   -1072  
-752   -672   
-80    896    
624    992    
-48    464    
0      352    
-384   -912   
144    240    
256    -192   
176    240    
-176   144    
-272   48     
-208   -320   
-112   -144   
208    -496   
-128   -432   
-96    -96    
-192   320    
-560   -224   
112    -96    
-384   -624   
352    -320   
128    752    
-160   1360   
320    -656   
16     512    
-16    416    
-144   -112   
48     160    
64     144    
192    624    
-112   -64    
32     -208   
-208   1184   
-208   0      
272    32     
32     -336   
-432   672    
80     16     
-64    304    
496    208    
-208   -16    
-320   96     
176    -176   
-16    784    
304    128    
-336   64     
-544   576    
1264   -528   
-352   -224   
-80    560    
16     320    
96     0      
112    1248   
-432   32     
384    -512   
224    80     
-304   -112   
32     80     
-128   144    
-64    192    
256    448    
-48    320    
-336   -1168  
704    -624   
-496   800    
-32    -96    
-112   80     
192    144    
-160   288    
48     -48    
-208   -560   
-112   -608   
672    -1168  
672    -336   
-544   448    
-176   96     
96     1088   
304    80     
-80    -640   
-768   -592   
-16    -464   
32     272    
-16    208    
176    16     
16     -352   
-352   -320   
160    -16    
128    -64    
192    -240   
16     -112   
-128   64     
-112   -96    
224    -432   
256    -16    
-416   112    
-384   -416   
896    16     
-336   -128   
-16    480    
544    1520   
128    880    
-304   -176   
224    -112   
-144   144    
-128   624    
-48    -416   
176    304    
0      -48    
-96    112    
-32    32     
16     32     
256    -32    
-80    144    
32     32     
144    368    
-80    496    
-256   224    
48     304    
128    -176   
112    176    
-80    -96    
-96    272    
352    16     
-240   -128   
-704   -352   
1920   1024   
-1280  800    
-784   272    
1120   208    
-448   -48    
0      48     
-256   32     
32     304    
224    176    
128    256    
-112   -16    
224    112    
-208   -96    
-16    -112   
-48    112    
128    16     
-112   80     
192    272    
176    128    
-16    112    
-96    0      
0      -576   
-864   928    
1344   -48    
-1024  48     
624    -96    
-64    128    
-288   -16    
64     448    
-464   384    
368    0      
144    96     
-256   -16    
144    112    
-96    -160   
480    336    
32     -80    
-288   -304   
304    -560   
64     -144   
192    112    
32     64     
144    672    
-16    80     
96     224    
416    128    
-208   240    
-48    464    
-48    336    
-160   304    
560    16     
-48    0      
-512   -32    
32     -96    
432    -64    
-64    -144   
192    416    
-368   352    
80     -320   
480    -304   
368    -32    
-96    80     
-320   32     
192    160    
320    192    
512    176    
-1056  304    
32     112    
320    96     
-144   -592   
2160   2544   
-1728  2064   
672    -560   
864    -752   
-992   -144   
192    416    
592    368    
-96    -144   
-112   80     
-80    -64    
208    16     
144    416    
-480   256    
16     48     
32     144    
96     80     
-144   16     
-128   96     
16     -272   
-48    432    
880    336    
-992   224    
304    32     
368    -96    
-208   -64    
176    160    
512    112    
-544   208    
448    -112   
-192   160    
624    -176   
-576   -144   
400    176    
-336   48     
128    240    
304    -2160  
-80    -16    
320    32     
-256   -16    
-400   -128   
336    64     
-32    -32    
96     48     
-128   96     
-176   -96    
-128   192    
272    -112   
-64    96     
64     -240   
368    208    
-384   -768   
208    128    
-16    320    
640    -16    
-464   384    
528    -256   
-80    48     
160    512    
-496   480    
176    176    
-32    128    
128    176    
48     96     
-192   -368   
128    -32    
-64    -144   
208    224    
80     -656   
-80    528    
-160   112    
96     48     
64     48     
80     496    
-288   272    
192    64     
288    288    
-112   272    
288    -176   
-208   -704   
64     160    
208    80     
-528   -2400  
-720   -608   
784    64     
-608   992    
1072   32     
-720   -288   
208    240    
-528   1088   
512    176    
-48    -32    
-80    -416   
-224   144    
160    0      
144    224    
-464   96     
336    -272   
-208   -320   
208    -112   
176    0      
-80    320    
-400   -656   
592    -896   
-816   128    
1120   -240   
-592   -576   
-96    -640   
112    128    
0      -288   
336    0      
-96    -128   
-192   112    
-368   -432   
704    -176   
-192   32     
-112   -896   
80     192    
-560   -96    
80     -1328  
-144   -80    
-256   -608   
336    -80    
112    176    
-80    -112   
-128   48     
64     -160   
16     320    
64     144    
64     -16    
-16    64     
80     -592   
-80    -784   
-896   -688   
352    448    
-240   -64    
480    48     
496    -144   
-336   -656   
-240   -368   
-32    288    
320    96     
-48    336    
0      160    
272    -560   
-160   -432   
-240   -160   
288    -80    
-224   176    
80     368    
288    352    
-32    -80    
-16    64     
-400   -912   
1056   16     
480    -2448  
-1792  -192   
1088   784    
784    -96    
-208   -1696  
-656   -1312  
224    -1152  
16     -896   
-48    -192   
16     -160   
-1376  -80    
48     -416   
48     -256   
16     -176   
-272   -976   
-528   -1504  
256    -736   
-272   -752   
128    -96    
-160   -352   
32     -160   
-304   -704   
-320   -752   
736    -1344  
-432   -176   
-96    544    
112    464    
-32    -80    
-80    -336   
96     -528   
-368   -944   
1136   -224   
64     -752   
-432   48     
272    -384   
-560   -208   
160    304    
352    0      
-320   112    
176    160    
-160   48     
144    -128   
-368   32     
480    0      
224    96     
-32    -48    
-96    -16    
32     -704   
-832   976    
640    624    
-912   48     
-400   -304   
1712   736    
-448   -128   
-112   -240   
-320   -1616  
-80    1248   
208    -432   
-80    -48    
-368   -16    
0      16     
176    224    
-64    -832   
-64    272    
-496   -64    
-352   -720   
256    -496   
32     16     
-400   304    
16     80     
-96    -208   
16     -32    
0      160    
-128   320    
-288   288    
512    48     
384    464    
-160   -80    
-64    -352   
-192   128    
112    -176   
-176   -16    
112    352    
-512   -208   
-96    -1024  
240    0      
-560   -576   
208    -512   
304    -432   
-208   96     
-112   -816   
0      576    
464    160    
-112   224    
-144   -384   
-32    -1152  
80     736    
-160   -192   
-272   -352   
144    704    
688    672    
-336   640    
-48    592    
304    112    
-192   -208   
80     816    
-32    448    
-448   -1344  
-720   -512   
128    672    
48     144    
-256   -288   
-304   -160   
64     512    
0      352    
-80    -272   
176    -240   
32     -608   
-688   112    
448    224    
-496   80     
16     256    
176    -592   
-496   -832   
128    -240   
96     -144   
-688   256    
-192   176    
-48    -480   
272    -1712  
-720   928    
704    -640   
-368   -288   
-160   -672   
208    -672   
144    176    
-160   -96    
-352   -432   
176    -240   
96     368    
16     304    
-64    368    
-336   464    
208    64     
-672   208    
-112   80     
-112   -64    
64     192    
-208   -224   
-240   -816   
160    80     
16     384    
-160   224    
208    624    
-624   336    
352    384    
-416   608    
-80    -112   
-96    -240   
160    0      
-32    -112   
112    32     
-32    176    
112    -64    
-32    -64    
0      96     
-144   144    
144    96     
-96    -96    
-256   0      
224    144    
0      16     
96     144    
240    64     
-608   96     
304    32     
-576   -64    
96     176    
912    1312   
368    -576   
-2608  608    
1664   -112   
112    96     
-320   112    
-400   16     
400    80     
176    0      
-448   -96    
336    48     
-272   -96    
-144   112    
272    -160   
-560   64     
448    -16    
-112   160    
-128   -64    
256    80     
0      -16    
-288   48     
80     -480   
1232   800    
-656   144    
224    112    
80     16     
-352   0      
-16    256    
128    -32    
176    -192   
-400   0      
-336   16     
-208   32     
96     48     
192    0      
-80    128    
0      80     
96     288    
-32    272    
64     0      
448    -96    
-192   64     
-192   160    
-448   160    
656    400    
-960   -400   
-1008  -128   
352    96     
-752   112    
-240   112    
368    -208   
-352   -64    
-272   -112   
288    112    
240    256    
112    -64    
-144   128    
-256   128    
-384   224    
336    208    
384    112    
-80    -32    
-64    96     
320    -144   
-16    32     
-272   0      
128    224    
464    -112   
336    144    
96     0      
512    1040   
-1408  4480   
1616   32     
-688   560    
416    -416   
-816   32     
192    32     
576    -304   
-144   48     
160    32     
-224   304    
-112   96     
-112   -80    
512    128    
-480   -16    
-144   192    
48     96     
-16    144    
-16    -96    
160    560    
-240   176    
0      512    
512    -112   
-448   64     
-128   112    
-16    64     
-176   48     
176    -128   
32     -192   
-96    -80    
96     -80    
-288   80     
368    -48    
-256   -16    
336    -48    
-352   240    
256    -96    
-16    -16    
304    -128   
-80    64     
0      224    
240    96     
-176   96     
16     288    
192    48     
-224   0      
48     -16    
304    80     
64     -16    
-560   -288   
432    -304   
0      -192   
160    -352   
-928   304    
656    160    
-736   592    
688    480    
112    -16    
-384   -576   
-224   -448   
224    16     
0      -48    
-16    112    
64     32     
128    -32    
-176   -80    
-16    -32    
16     32     
80     32     
-16    240    
112    128    
0      304    
112    -176   
-192   -64    
-32    -192   
-176   192    
64     160    
0      -48    
-112   -128   
128    -144   
-112   -48    
0      80     
144    2192   
1136   -384   
-1488  -256   
720    -448   
-208   560    
448    -240   
-256   400    
-192   -448   
80     144    
160    96     
64     -48    
80     160    
-112   -976   
80     -304   
-16    -336   
144    256    
-144   416    
32     176    
-144   176    
112    -176   
-48    -608   
176    -304   
-272   80     
16     640    
304    32     
-144   -1136  
128    160    
128    -64    
48     -16    
64     208    
-144   -176   
-32    272    
208    -256   
224    176    
-48    272    
368    144    
-208   208    
-384   -896   
432    848    
80     80     
-208   -416   
-48    448    
-160   -96    
304    -16    
80     -1856  
-352   96     
-32    400    
240    -64    
464    -432   
-928   256    
-480   1232   
2944   -544   
-1840  128    
480    -1264  
624    -240   
-432   416    
592    32     
64     336    
-80    -192   
-160   -784   
208    48     
176    -16    
32     352    
96     480    
16     -128   
32     160    
176    144    
-272   208    
112    -336   
-16    112    
496    1104   
-336   -752   
-1424  160    
1568   384    
64     -1200  
-112   -16    
-176   -1264  
400    -1088  
-176   1136   
352    1424   
-112   -528   
-480   -736   
256    -144   
240    640    
-272   288    
-240   -32    
384    128    
96     368    
256    -80    
-48    64     
-128   336    
272    128    
144    -128   
-96    -176   
560    688    
400    112    
-752   -1680  
336    -160   
-336   -992   
-304   144    
624    48     
-272   0      
608    240    
-16    -160   
160    -48    
272    -64    
-368   -112   
992    -1072  
-448   -272   
352    128    
-112   304    
96     -288   
304    -144   
0      448    
128    736    
-224   256    
-192   -352   
-32    -320   
144    -272   
224    -464   
352    1168   
0      -144   
-256   -1152  
1136   -752   
-624   -400   
-304   736    
144    1120   
368    -448   
448    -704   
-272   -448   
-64    -32    
-16    592    
480    480    
-128   48     
-208   -448   
-16    -736   
32     224    
64     -416   
208    768    
-224   -176   
64     -320   
-64    -432   
-288   -640   
400    384    
-176   -128   
64     768    
-64    -656   
32     688    
384    1040   
96     864    
-192   -432   
-16    -784   
320    -752   
-96    784    
-96    176    
-96    480    
240    224    
-80    192    
224    32     
-96    -112   
32     -272   
-32    -144   
-128   -112   
128    -1776  
0      -960   
-608   -832   
-160   -224   
-16    -816   
48     -192   
32     176    
-48    352    
16     -704   
-800   -192   
0      976    
576    496    
-320   608    
-80    192    
256    176    
-16    -752   
208    1152   
-528   480    
256    512    
528    -80    
-384   176    
-48    -80    
-32    -384   
416    400    
-272   208    
224    976    
-288   640    
192    288    
304    -336   
64     -320   
-144   -1088  
16     -144   
240    -1600  
80     -240   
-320   -624   
192    -1408  
-176   -496   
-592   -1344  
1232   -1776  
-752   592    
560    -656   
-208   176    
-464   -176   
432    -224   
32     192    
272    -592   
-448   224    
144    -1200  
128    32     
240    -384   
-16    352    
-256   -224   
160    160    
-112   -112   
160    -160   
0      96     
-96    16     
32     -112   
624    -272   
-1792  160    
1200   16     
-256   -128   
-896   -352   
1232   -192   
-560   128    
128    -400   
-352   208    
688    160    
-144   16     
-80    -128   
-144   -112   
64     -32    
-224   -32    
96     -32    
256    80     
-160   -336   
-48    32     
48     -656   
432    -80    
-592   64     
192    16     
-304   0      
192    48     
-96    0      
-112   48     
96     16     
-96    48     
752    -528   
-1488  -896   
0      -304   
352    -400   
-80    0      
880    -144   
-1136  304    
496    64     
-176   272    
64     -176   
272    48     
-480   -32    
0      96     
32     -192   
656    -32    
-672   -176   
192    16     
0      0      
-304   96     
208    16     
-384   -64    
-80    -608   
960    464    
-1856  -416   
528    128    
848    -112   
-1152  176    
816    -32    
-144   64     
-688   -160   
128    128    
-368   -48    
80     96     
80     -16    
16     64     
-16    -32    
-400   64     
128    -192   
-80    192    
-80    48     
-192   -144   
384    112    
-1520  16     
336    -80    
-656   0      
240    32     
80     224    
-16    464    
-336   -560   
-416   256    
480    32     
0      144    
-320   16     
-96    -16    
144    208    
-496   0      
320    32     
-64    16     
208    656    
240    -160   
48     416    
-160   16     
-288   80     
-32    -192   
0      80     
128    -64    
-480   96     
128    80     
-32    -128   
48     128    
-1536  -2112  
2352   -3504  
-224   1488   
-512   224    
-128   240    
-112   112    
-224   32     
688    128    
176    624    
-880   256    
128    304    
672    -64    
-368   96     
0      -16    
-96    64     
176    -128   
-128   96     
-16    16     
-368   16     
-1312  -352   
576    560    
-400   352    
16     160    
256    -112   
224    -80    
-288   208    
192    48     
-592   256    
768    304    
-192   208    
-144   -32    
272    288    
-176   192    
-144   288    
112    512    
288    640    
-368   480    
64     112    
-272   368    
288    176    
64     96     
-368   208    
224    512    
48     368    
128    -352   
0      -880   
224    416    
-304   1136   
336    688    
64     464    
-160   496    
-1088  16     
368    176    
-16    432    
48     240    
192    272    
-208   832    
64     1088   
64     480    
336    448    
-160   272    
-288   368    
128    304    
240    256    
-144   192    
160    656    
-528   240    
320    352    
528    784    
-64    160    
-208   -400   
-80    416    
384    208    
176    80     
-16    96     
-48    256    
-48    496    
336    -96    
-160   592    
-96    -640   
-80    400    
160    464    
-64    -320   
0      -16    
512    1072   
-96    -16    
-608   -160   
-48    -336   
416    864    
-208   -320   
-240   -176   
144    240    
-48    -336   
240    320    
-272   -240   
-112   272    
0      -128   
288    -80    
-128   -368   
-144   -32    
-112   -208   
-96    -16    
912    -432   
-480   688    
432    -560   
-464   -256   
-16    128    
112    -16    
320    384    
-176   48     
80     80     
-128   -112   
336    256    
-16    -32    
-64    272    
208    -176   
-288   -48    
304    -352   
384    48     
-144   -160   
-208   96     
-176   240    
352    -128   
32     288    
-80    -144   
-320   288    
496    64     
-112   320    
224    -64    
48     16     
32     -32    
1856   832    
-1888  1328   
-96    288    
128    32     
16     208    
-32    480    
16     96     
416    320    
-112   496    
336    384    
144    -240   
16     -336   
0      112    
-96    304    
192    288    
64     -400   
-144   -16    
-400   144    
688    528    
-128   -32    
240    -144   
-960   32     
1392   -2000  
-720   144    
256    512    
560    544    
-464   96     
-528   -1440  
240    -240   
752    1264   
-272   1136   
480    608    
240    16     
-384   32     
-32    -128   
224    384    
144    -192   
-384   -640   
-128   -192   
256    208    
128    208    
48     64     
80     16     
-208   -176   
304    112    
704    416    
368    800    
320    304    
-208   1456   
512    384    
64     144    
-272   -368   
240    -432   
304    624    
-576   80     
432    304    
16     -128   
544    1680   
-1264  1232   
0      416    
144    -256   
-128   176    
80     -416   
-544   -96    
384    -336   
-256   -384   
96     -320   
32     -272   
0      -624   
112    -1296  
-192   272    
512    2448   
144    -256   
-480   384    
64     432    
-96    128    
1216   0      
-1376  -1152  
-272   -272   
704    -432   
352    272    
-144   -144   
-560   -80    
288    -64    
288    16     
128    80     
48     -800   
-256   144    
192    -528   
320    -864   
-288   224    
128    608    
-256   640    
512    80     
256    -48    
-592   -336   
448    384    
-368   -176   
208    96     
320    -192   
-272   112    
-16    32     
-112   160    
64     -752   
608    -160   
-128   -32    
-176   -64    
-176   -336   
96     -32    
-160   144    
96     -16    
0      -32    
-48    -224   
-48    -80    
80     -560   
320    160    
-352   112    
208    544    
96     80     
-416   240    
160    96     
128    144    
-432   176    
592    -80    
32     -192   
-112   -48    
384    112    
-192   -224   
240    304    
128    -176   
-160   128    
48     48     
-16    112
[truncated: 326,011 more chars]
