# Supplementary material for: A Fault Diagnosis Method for One‐Dimensional Vibration Signal Based on Multiresolution tlsDMD and Approximate Entropy
Source: Hindawi journal article supplement (doi:10.1155/2019/3262818), 2019-01-01
Supplement: f1 [file 3262818.f1.zip › 3262818.f1/gear signals/pitch errors signal/Data18.txt]

288    672    
608    16     
-176   -240   
304    288    
96     208    
-160   -176   
96     320    
240    -192   
-256   560    
144    96     
-288   128    
416    48     
192    944    
-896   -576   
448    1472   
1376   128    
-1616  80     
288    96     
288    -32    
496    304    
-592   -880   
-208   256    
-80    -1600  
160    320    
224    -160   
-48    96     
-128   80     
-304   288    
288    -368   
-32    256    
0      -96    
-192   144    
720    176    
-1072  112    
1024   128    
-144   48     
80     80     
-256   0      
64     240    
416    -96    
-192   256    
-112   -192   
-80    -80    
-112   -80    
176    -32    
16     240    
80     32     
160    128    
336    -64    
-208   32     
160    32     
400    576    
-16    320    
-320   128    
304    -816   
192    144    
-336   -320   
96     368    
-480   96     
192    112    
320    -32    
-48    240    
16     288    
-96    -32    
272    48     
16     -448   
288    -320   
80     -16    
64     704    
992    -704   
-832   352    
432    480    
512    240    
32     16     
80     192    
-272   48     
176    96     
112    0      
224    176    
160    208    
-80    -368   
96     64     
48     -80    
240    416    
144    -48    
-256   48     
-16    192    
192    160    
-80    -80    
240    -48    
96     144    
-176   32     
176    176    
48     -528   
96     96     
48     -2256  
-1696  2016   
1680   16     
-832   224    
672    -112   
-304   -176   
-480   144    
0      -368   
208    -160   
336    416    
-288   272    
32     -240   
-96    -64    
80     -272   
-144   -144   
160    48     
96     112    
-112   -368   
96     -208   
80     -544   
-320   -96    
816    368    
-336   -304   
-128   -160   
384    -480   
-480   192    
512    -192   
288    -192   
-304   160    
-224   -320   
96     -160   
240    32     
272    64     
-192   192    
-224   -384   
16     -112   
400    0      
-384   -368   
160    144    
144    -464   
-208   -336   
-96    -48    
-32    -144   
-64    0      
368    -144   
-288   -80    
-224   -192   
336    16     
64     48     
-128   112    
768    2016   
-704   688    
-1424  304    
1632   -192   
-272   -160   
-416   16     
160    416    
-304   -160   
-48    -96    
320    -544   
0      64     
-240   -560   
16     0      
128    -880   
336    -80    
-624   -336   
272    96     
-112   -112   
-64    -224   
-32    -256   
-192   -32    
-816   -592   
1184   288    
-896   -96    
416    -960   
272    -32    
-304   48     
128    -304   
400    -848   
128    240    
96     -240   
-112   304    
-64    32     
112    -48    
48     -112   
-128   -352   
-128   80     
-48    48     
-64    -144   
-160   256    
112    -112   
80     -688   
272    128    
-1040  464    
832    -240   
16     192    
-432   -16    
176    -112   
176    128    
-240   -48    
80     -16    
-80    -64    
-16    -32    
-320   0      
112    -272   
-80    -336   
400    0      
-672   -96    
-192   -48    
160    -128   
-688   112    
672    -208   
-128   96     
0      -208   
16     64     
-32    0      
272    0      
-784   368    
-192   0      
384    192    
-496   0      
1008   2448   
-1184  2208   
944    -720   
2112   -256   
-736   -400   
-992   64     
1200   400    
-832   -496   
-96    -480   
48     -448   
16     128    
-144   -16    
-128   -64    
464    32     
-144   -272   
16     -208   
-336   -624   
112    -48    
-224   -80    
368    -976   
-176   -608   
-448   16     
304    272    
-480   -368   
-16    -592   
-32    304    
80     480    
48     400    
160    560    
-320   -48    
128    -592   
64     -352   
-32    64     
96     608    
-144   208    
112    32     
112    208    
144    496    
-80    976    
-64    528    
192    -48    
-16    336    
-288   -16    
16     448    
-128   928    
48     432    
64     -48    
-1024  144    
336    880    
-176   -48    
336    576    
-352   160    
-448   688    
320    480    
-560   -192   
128    -400   
336    -384   
64     -80    
-16    1136   
16     912    
-128   -800   
-112   -352   
192    160    
-96    112    
64     -112   
80     64     
-128   96     
32     160    
16     160    
-32    224    
-192   -48    
-384   -80    
-272   16     
-48    48     
0      144    
-208   80     
-16    48     
-64    -176   
-96    -80    
-240   -160   
-96    32     
-176   96     
720    336    
-1200  496    
336    -112   
-288   176    
-96    48     
176    -32    
-416   224    
-192   160    
80     -16    
-16    64     
-144   -176   
-384   48     
80     48     
-96    -96    
-80    16     
-160   -192   
-272   -208   
32     -256   
-16    -48    
-320   208    
-32    -432   
-720   -224   
-224   544    
-208   -80    
416    -128   
272    -528   
128    160    
-368   1056   
-144   304    
496    -64    
-192   16     
-656   -272   
112    0      
48     -48    
-176   272    
400    48     
-1680  -224   
-144   640    
-16    256    
592    -576   
-576   -784   
-272   688    
-176   736    
192    -448   
48     80     
-192   256    
208    -144   
-112   336    
256    -112   
-416   -80    
128    -768   
-2480  -80    
1312   -144   
32     1072   
-784   1920   
368    304    
128    80     
-192   752    
-576   768    
560    224    
-80    64     
-16    16     
-128   0      
-144   -96    
-192   96     
176    160    
-224   0      
-32    576    
-64    224    
-144   80     
-48    -16    
-768   -112   
1776   -496   
-480   -144   
-368   272    
528    288    
-224   -80    
-624   144    
304    48     
-416   -160   
144    64     
-32    -128   
96     96     
32     336    
-400   144    
-192   16     
432    112    
96     368    
-416   16     
-192   16     
256    -112   
80     48     
-208   272    
720    -288   
-240   32     
-16    496    
32     16     
208    -528   
-144   -416   
368    32     
-64    64     
-240   176    
32     304    
-96    -160   
-208   96     
-224   -32    
112    80     
80     80     
208    -192   
128    640    
96     256    
-656   -80    
96     128    
176    128    
-80    32     
-368   -288   
928    240    
-96    -96    
-256   96     
656    256    
-848   1840   
-64    1936   
288    624    
-1120  624    
80     -608   
464    432    
336    -96    
-784   384    
416    64     
-208   400    
-144   -144   
144    240    
-48    16     
-528   336    
112    80     
0      208    
64     0      
-272   32     
160    64     
-224   -128   
1056   -352   
-592   32     
320    16     
-336   144    
-688   16     
256    -160   
224    368    
288    -48    
-944   208    
976    176    
-544   32     
256    0      
-176   80     
128    144    
-480   -80    
208    288    
640    112    
-448   -16    
0      -96    
192    16     
0      192    
-80    -144   
160    64     
-272   -208   
240    176    
-320   256    
-176   208    
-80    208    
352    32     
-272   -48    
-64    -560   
144    48     
32     32     
-224   -32    
560    -112   
-256   0      
48     -128   
416    272    
-224   -272   
80     -336   
-160   -160   
192    -80    
-144   64     
-32    -32    
208    48     
96     -256   
64     144    
-400   -240   
288    -752   
-112   256    
32     352    
384    -256   
-496   240    
0      272    
384    -64    
-48    -64    
-176   256    
32     224    
-32    16     
384    256    
-352   352    
48     96     
-624   -1248  
1664   -304   
-1024  640    
544    144    
-496   304    
-528   48     
512    -32    
144    -448   
64     -736   
-464   192    
64     -80    
48     -64    
64     96     
-128   -288   
-288   -368   
496    -2880  
-48    496    
64     176    
-144   -176   
48     -176   
48     128    
672    288    
-1200  1136   
688    -272   
-192   48     
432    16     
-400   -192   
-48    32     
96     112    
-16    128    
400    -176   
-224   80     
-80    -112   
-64    240    
368    240    
160    160    
-144   192    
-112   32     
480    -16    
-160   128    
224    96     
-192   -176   
16     224    
112    -32    
96     128    
-96    -464   
112    224    
-48    -3680  
-224   112    
240    32     
416    144    
-1232  144    
256    352    
272    48     
-464   -256   
336    -80    
880    -176   
-1216  -352   
336    -608   
384    -160   
-208   -400   
96     192    
240    16     
-176   272    
128    224    
-112   64     
160    -64    
-192   176    
32     32     
400    368    
64     128    
-144   192    
768    304    
-1760  336    
1136   112    
-336   -544   
-784   -128   
672    640    
-736   288    
0      -64    
128    16     
-528   192    
384    112    
-144   -112   
-64    -800   
0      32     
160    -384   
32     48     
-48    -16    
176    144    
-128   -96    
-144   -512   
0      -224   
32     192    
-416   1040   
352    -384   
-240   128    
624    112    
-208   -1392  
-608   -64    
656    560    
-80    -336   
-96    192    
32     192    
-128   320    
16     -256   
-624   96     
352    240    
32     -1792  
-96    304    
16     64     
-544   112    
208    -656   
176    -512   
-80    -240   
80     -304   
128    384    
224    -384   
-496   288    
256    64     
224    -416   
-128   -688   
800    1424   
-256   64     
-304   384    
1792   448    
-880   1792   
-192   1344   
128    432    
560    -1520  
-288   -624   
-352   -304   
240    480    
256    -464   
240    -352   
-224   48     
-336   -256   
208    -144   
336    -112   
-144   224    
-128   -368   
-128   16     
0      464    
-16    176    
-352   -112   
-96    -48    
240    -192   
-288   32     
80     736    
272    960    
-80    -1072  
-160   144    
96     624    
64     144    
224    304    
-96    -384   
112    16     
192    544    
-96    -96    
-176   -48    
160    704    
-64    128    
48     -336   
-32    -464   
400    -208   
-320   -288   
0      -1008  
-176   144    
288    144    
128    272    
-432   -592   
-112   -272   
48     -48    
-48    -400   
464    -16    
-496   -320   
-400   -448   
-240   -688   
32     -576   
400    128    
-256   -192   
-96    -1536  
-32    -64    
208    112    
-96    -32    
112    128    
-16    416    
-144   -272   
352    352    
-304   32     
-112   -880   
688    -272   
240    848    
-336   -368   
16     -288   
272    48     
-144   -208   
144    0      
-352   -272   
288    0      
240    288    
544    128    
-752   256    
304    -48    
-464   -512   
544    -688   
-880   352    
624    352    
-1232  784    
0      -192   
192    -208   
-32    48     
64     16     
-64    16     
0      16     
80     -144   
-192   368    
-320   -176   
-208   208    
192    -480   
256    -32    
-368   16     
-96    -16    
128    32     
0      -736   
128    -640   
-208   -144   
-112   -48    
432    -1648  
-160   -192   
-384   528    
0      64     
-128   304    
192    144    
-240   -96    
-288   160    
-144   -112   
416    240    
336    16     
-368   48     
-32    304    
-80    -336   
-16    192    
-80    240    
-272   528    
144    352    
-944   -64    
112    400    
-144   -176   
64     272    
48     -176   
-208   240    
-96    0      
288    -992   
-896   -400   
-1984  768    
1328   -368   
560    -176   
-784   -416   
0      144    
320    -368   
-1168  -832   
16     -224   
336    -176   
368    256    
-624   -112   
80     16     
64     -176   
384    272    
-560   -176   
80     64     
32     -304   
32     -48    
-112   -16    
32     192    
-688   144    
1568   -352   
-800   432    
192    272    
304    128    
-880   -32    
32     -32    
-320   -432   
-384   304    
432    -16    
176    80     
-160   -96    
-128   -32    
-320   16     
704    32     
-640   192    
128    -80    
48     -304   
-304   -144   
304    -96    
-1296  -224   
288    288    
224    -16    
80     272    
320    112    
-144   192    
-208   528    
-416   144    
-128   416    
928    16     
-160   32     
-720   -16    
64     48     
240    -224   
32     -112   
-176   272    
-512   272    
16     -304   
640    -272   
192    -304   
-160   -16    
-256   -48    
176    224    
240    192    
608    384    
-1024  144    
-256   16     
656    96     
-144   -640   
576    1104   
800    -544   
128    544    
192    -256   
-416   -128   
-176   544    
688    240    
-304   112    
288    -176   
-352   -96    
-64    304    
-144   192    
224    -80    
-80    112    
112    48     
0      48     
-400   -96    
-16    128    
-304   32     
-208   -496   
-592   -32    
448    -208   
-464   64     
752    -96    
208    16     
-496   48     
-416   336    
640    16     
-192   240    
400    -32    
-592   96     
272    32     
-240   0      
-16    -224   
112    -80    
-16    -64    
-48    128    
-304   -16    
112    0      
288    224    
-48    0      
-32    48     
-160   96     
192    80     
-16    112    
128    64     
-64    -80    
-96    0      
160    432    
-192   192    
256    272    
-16    -16    
-64    544    
0      -144   
-288   640    
224    -384   
-576   -144   
-112   -16    
96     416    
608    64     
-160   -64    
-112   -48    
-96    112    
-112   -96    
240    80     
-304   160    
144    16     
-32    16     
-160   96     
128    -656   
-368   -240   
48     352    
-32    16     
272    -224   
-112   -288   
-80    176    
-320   -432   
144    -64    
80     448    
-128   416    
-80    -32    
64     0      
-48    2656   
1248   -512   
-1888  288    
528    -528   
-96    576    
416    208    
-528   -896   
128    -720   
-80    272    
80     400    
112    16     
-112   80     
-128   256    
352    352    
-336   960    
224    128    
-368   -16    
-32    -160   
144    32     
64     352    
-320   -432   
48     -864   
-416   320    
1408   -160   
-864   -112   
144    -320   
-320   432    
80     0      
320    -144   
80     32     
-336   144    
-544   -544   
768    -160   
-144   304    
-176   160    
-64    464    
0      368    
-32    -128   
64     -224   
-368   -32    
288    144    
128    32     
80     80     
-240   -128   
64     -48    
-32    64     
-96    128    
208    128    
-128   -48    
-176   -384   
1376   -112   
-1776  -480   
32     -720   
480    96     
-528   -144   
528    -608   
112    160    
-112   144    
-432   -272   
288    -192   
192    -400   
-272   -192   
-32    128    
368    336    
-496   224    
64     144    
320    160    
-336   -560   
-224   -208   
-48    -288   
-32    -1088  
640    -144   
-2144  928    
1456   240    
-560   16     
-832   -544   
592    -464   
352    816    
0      800    
-288   -160   
448    -16    
-80    192    
-208   96     
128    416    
-16    512    
48     432    
96     208    
48     560    
64     336    
-208   704    
544    720    
-256   544    
112    576    
-288   224    
496    -64    
-208   -160   
-560   832    
1008   608    
160    592    
64     -288   
32     -800   
-112   -176   
-368   -1504  
352    -496   
-880   -560   
592    -416   
384    368    
-368   -192   
480    -672   
-272   -192   
-368   -208   
288    240    
-288   384    
96     -416   
32     96     
272    -384   
-352   560    
-432   80     
-48    208    
112    -96    
208    -128   
656    1360   
-720   976    
320    256    
1616   -176   
-880   512    
-656   1184   
560    240    
-192   -1328  
384    320    
-64    48     
-176   544    
368    -656   
352    -144   
-64    -1584  
-160   144    
352    112    
160    304    
368    -224   
-96    -752   
-208   -352   
128    64     
144    416    
80     -240   
-352   -64    
304    -416   
-128   -240   
176    -896   
-80    16     
-400   -592   
48     320    
544    352    
-96    16     
-128   352    
32     160    
128    -256   
-288   -272   
384    784    
224    768    
-240   400    
-16    336    
272    384    
112    -560   
176    352    
-176   64     
336    112    
-192   128    
224    112    
-16    -736   
304    832    
-448   432    
256    -144   
48     80     
336    64     
0      992    
-192   416    
448    1392   
-48    544    
192    560    
96     896    
160    16     
-32    -1152  
-272   1088   
208    944    
256    48     
-96    -512   
32     -224   
0      -240   
32     160    
80     -16    
96     576    
96     -112   
-176   -96    
288    64     
-96    -384   
-80    -1184  
416    736    
32     448    
0      384    
160    -32    
-896   -656   
-128   -80    
160    -144   
496    2320   
864    -1184  
-720   96     
-272   592    
288    -64    
112    752    
-144   -208   
-144   -1024  
192    512    
48     736    
32     -80    
-272   -192   
64     -320   
352    368    
96     144    
112    144    
0      32     
96     -272   
48     -1696  
-112   -144   
-112   -496   
368    -1568  
-96    112    
368    160    
-240   -192   
208    736    
208    160    
64     672    
128    272    
-112   0      
0      -64    
96     -288   
-48    32     
80     -240   
-32    112    
16     -432   
256    128    
-96    48     
112    48     
-32    -32    
128    48     
96     16     
-320   80     
-240   192    
-176   -192   
-112   -48    
272    -256   
-96    64     
32     -656   
-144   288    
384    48     
-1616  -528   
1472   -176   
-176   96     
-848   -112   
512    224    
112    64     
-256   64     
-464   336    
192    80     
-160   48     
-384   -208   
256    112    
-208   -160   
512    272    
-96    -288   
-144   -64    
320    32     
192    64     
-80    64     
112    -48    
368    976    
-768   -976   
-160   80     
240    80     
-352   32     
-144   -80    
336    80     
256    -128   
-192   112    
208    -400   
-128   144    
-32    128    
176    16     
-64    -48    
112    -128   
-160   16     
128    -96    
-208   352    
528    368    
112    -272   
-240   -384   
-224   -224   
-32    -144   
464    320    
-1008  -128   
-224   288    
96     -1392  
-800   -448   
-32    48     
528    64     
-592   -64    
-64    48     
16     0      
208    192    
0      -80    
240    0      
-368   160    
-256   144    
304    48     
320    -224   
-48    -64    
-624   -32    
464    -320   
-256   64     
-208   0      
64     176    
560    -192   
-32    64     
192    -144   
400    1568   
-2272  2896   
1280   1520   
-448   672    
-64    -16    
-608   -256   
-288   -16    
896    224    
-880   48     
-400   0      
-528   112    
208    32     
224    -160   
-384   16     
-32    0      
-240   112    
192    -32    
-64    0      
-32    -240   
-496   -320   
80     96     
-128   -176   
-96    -16    
-32    112    
-576   32     
80     96     
160    112    
-336   0      
-96    -64    
128    224    
-128   128    
-448   -224   
-48    208    
-112   -336   
-352   112    
144    -336   
-432   -192   
368    -96    
-624   -48    
96     224    
80     544    
-224   112    
-112   -80    
320    240    
-128   -96    
144    112    
-96    -64    
-64    64     
-224   -80    
208    64     
128    -160   
-656   -224   
32     -144   
192    592    
688    112    
-592   -128   
480    16     
-400   -160   
-32    -400   
-1456  -464   
224    240    
-288   32     
272    160    
64     -112   
-160   128    
-48    192    
144    144    
80     112    
-64    240    
224    48     
16     432    
-192   416    
160    592    
-112   160    
-128   112    
272    416    
-192   224    
80     368    
-272   -352   
96     -160   
96     16     
-176   16     
-16    192    
848    2512   
624    528    
-1056  -656   
240    -384   
-496   544    
528    -64    
-432   -80    
-144   -688   
-1520  -576   
272    0      
160    -32    
0      256    
-128   -144   
112    -176   
-144   -208   
160    272    
-96    32     
-288   0      
0      -192   
144    272    
832    512    
-1152  1392   
320    -320   
-624   192    
288    -208   
-192   256    
-128   -80    
96     16     
80     224    
48     -272   
-224   64     
-176   -112   
176    448    
-176   480    
-352   -304   
-448   -80    
80     -464   
480    752    
-80    -384   
-80    16     
-192   288    
-48    48     
336    336    
32     -352   
16     -336   
-16    240    
224    400    
-176   -96    
-256   -368   
288    -784   
1264   -448   
-2672  544    
704    -560   
-416   -480   
-912   -1312  
80     -480   
-480   -464   
-32    624    
208    240    
-32    -160   
128    384    
-80    -144   
-128   -160   
-32    112    
-192   304    
192    0      
-208   16     
-128   400    
416    288    
-144   -80    
48     -32    
-608   -608   
544    -48    
576    752    
-896   -496   
80     64     
16     -704   
-304   -1040  
-672   -592   
560    -16    
96     912    
-176   336    
224    -320   
-96    -144   
80     80     
288    -112   
240    -64    
-496   -336   
432    160    
144    496    
-64    144    
112    -272   
-272   496    
32     48     
176    272    
176    -256   
-784   0      
560    1456   
464    256    
-272   240    
336    128    
-480   -160   
432    320    
144    -160   
-560   592    
208    288    
-576   352    
336    496    
-96    672    
-240   464    
592    -288   
-400   48     
64     144    
160    480    
-464   -160   
224    176    
-560   288    
80     272    
-128   -192   
80     176    
160    128    
1232   2384   
-1440  896    
-16    768    
1680   -416   
-464   1312   
-128   1504   
-144   208    
192    -272   
464    -336   
-48    -496   
-96    352    
-176   272    
480    576    
-16    384    
-288   -480   
-208   -64    
-48    -16    
16     256    
144    416    
-16    992    
128    544    
112    48     
-192   -480   
-352   208    
384    -720   
-752   -896   
192    -368   
-64    -512   
-304   -368   
-176   -720   
368    464    
96     704    
112    736    
-112   -400   
144    16     
-128   -304   
192    -2096  
256    -224   
-384   -32    
192    -64    
96     128    
256    144    
-48    176    
272    112    
-240   -192   
256    -368   
0      -288   
128    -96    
-112   -256   
32     208    
128    704    
-128   -176   
640    -416   
96     832    
-416   816    
288    1120   
336    896    
-48    880    
-352   480    
272    272    
256    848    
336    336    
-224   304    
-304   336    
448    96     
112    48     
-128   -480   
-192   112    
144    -208   
-32    -192   
192    0      
-176   304    
-80    144    
192    160    
48     -16    
288    304    
64     480    
-400   896    
688    1200   
-240   1040   
-80    656    
448    1344   
-608   -1184  
288    -848   
976    32     
-208   -368   
-464   432    
32     -528   
176    432    
128    -384   
-240   176    
128    96     
-192   112    
320    -208   
80     64     
-256   -48    
32     -32    
0      -112   
208    -480   
48     208    
-144   -496   
160    -32    
864    816    
-1824  352    
608    160    
416    -272   
-976   -128   
640    -448   
-352   304    
288    32     
-480   432    
320    -160   
160    16     
-80    -144   
-224   -48    
160    -240   
-16    64     
16     192    
-192   96     
16     -64    
-64    112    
144    -80    
-96    -512   
288    64     
-464   -160   
144    -64    
160    -304   
96     16     
-32    -368   
-240   176    
320    0      
-528   -1008  
1616   -2240  
-1072  -160   
656    -64    
192    512    
-432   -96    
-320   48     
528    544    
560    224    
-112   112    
-272   -224   
-112   176    
320    80     
112    128    
-304   -304   
-16    272    
240    -96    
-256   -1504  
416    -16    
-464   -112   
272    -688   
-176   64     
-480   -1232  
-208   -80    
944    -400   
-1568  -304   
1216   96     
-352   32     
96     240    
-16    32     
-176   -1360  
144    0      
192    -288   
16     64     
-304   16     
112    -48    
-32    -80    
48     -352   
160    176    
16     -80    
320    32     
-160   208    
-112   0      
400    -560   
-416   160    
464    -144   
-320   384    
240    464    
240    -208   
-112   256    
624    -416   
-432   -16    
-64    -368   
144    -224   
160    -16    
-336   -112   
432    -64    
-80    -320   
-80    -368   
576    -336   
-384   176    
336    -32    
112    -32    
32     -112   
-304   48     
368    -96    
-224   96     
0      16     
-288   16     
0      -432   
272    -80    
1408   4960   
-64    2512   
-880   -656   
1696   -560   
-352   -176   
-848   96     
48     96     
432    -16    
16     208    
-1088  144    
176    176    
80     -48    
48     -144   
192    -176   
-112   -16    
-32    -32    
32     96     
160    -576   
-304   48     
-192   -256   
384    208    
-320   336    
32     32     
336    -16    
384    -176   
-800   176    
288    -64    
-896   -176   
304    -48    
-208   -32    
-272   -320   
160    160    
-48    -384   
192    272    
-128   -224   
176    -352   
-160   -224   
-64    -80    
64     -272   
-80    -224   
-32    32     
-160   -144   
-608   -320   
208    -320   
-16    16     
-128   96     
-48    656    
560    -784   
-352   -512   
208    128    
16     -256   
-192   -160   
0      -1008  
-128   -224   
176    352    
-384   576    
432    160    
0      336    
256    16     
-288   320    
-192   144    
416    256    
144    -48    
-80    160    
80     512    
-16    384    
160    672    
16     -16    
-128   336    
-48    1088   
112    208    
48     -656   
-16    -96    
-128   240    
-64    336    
208    48     
64     480    
-64    288    
-176   -208   
-128   416    
0      -416   
-128   -48    
128    -1856  
-544   -464   
16     160    
-64    -928   
304    -624   
320    -64    
-48    272    
256    -688   
208    160    
224    64     
-592   -464   
-784   240    
32     -112   
-160   112    
-304   96     
-336   320    
-144   16     
288    96     
96     352    
32     144    
112    656    
-688   720    
416    -208   
-400   336    
-272   320    
-720   -672   
240    -256   
400    48     
64     688    
-80    -96    
-400   -32    
224    32     
192    32     
0      128    
144    -144   
-368   -176   
240    -592   
512    176    
-240   -352   
-224   192    
-224   160    
400    16     
112    48     
-368   -144   
-576   80     
-64    144    
176    160    
-288   -160   
-48    -64    
-192   -64    
1120   1264   
-400   1200   
-464   480    
496    144    
-176   544    
-288   48     
0      80     
496    -784   
288    304    
160    480    
-128   416    
16     208    
48     -464   
-128   144    
-880   -96    
432    352    
-128   32     
-368   -176   
160    -560   
352    400    
-160   112    
-112   -912   
-1120  1552   
1232   -608   
-976   -688   
848    -464   
-272   -64    
-160   16     
-1280  -1216  
-400   -2032  
96     -1072  
-272   288    
192    672    
-144   -256   
-544   -64    
-144   -288   
96     144    
336    448    
-480   240    
-144   -368   
48     -320   
-96    -32    
-96    288    
208    480    
-464   -144   
-112   -736   
-288   -1616  
-192   -656   
176    -544   
-736   -464   
176    -80    
-32    304    
-320   240    
16     -32    
480    -832   
-224   64     
240    208    
-272   -1024  
976    -1728  
-48    -224   
192    368    
-864   192    
-288   192    
448    832    
-432   1040   
80     144    
-144   -480   
32     -320   
64     288    
-416   336    
-32    240    
1056   608    
-1920  -624   
816    128    
240    208    
560    992    
-1760  16     
304    -1360  
1136   -256   
-144   -352   
-672   480    
-176   -48    
208    48     
448    -160   
-400   112    
-224   176    
-208   -48    
128    -64    
112    -80    
-736   -768   
160    -336   
0      608    
240    240    
112    496    
-768   -144   
224    80     
400    -272   
-144   64     
160    64     
-304   16     
-80    -208   
384    -672   
-256   -352   
128    112    
-256   448    
-176   112    
352    -16    
192    240    
-48    112    
-112   -48    
208    80     
80     144    
16     224    
-96    208    
80     400    
-224   96     
-48    128    
80     -304   
-704   -368   
176    -416   
80     -96    
48     32     
-208   32     
208    720    
800    384    
-256   160    
80     272    
-112   128    
-112   -16    
416    176    
-64    112    
-112   128    
-128   128    
80     240    
-112   80     
-48    304    
96     224    
48     176    
-160   80     
112    16     
240    672    
-560   224    
272    -48    
80     144    
64     0      
-96    208    
16     96     
-336   -112   
608    -464   
-128   144    
-128   128    
96     368    
-256   -640   
1904   1760   
-480   640    
-784   160    
352    256    
-384   -48    
0      -176   
384    -16    
128    160    
-416   80     
80     -32    
288    224    
-80    80     
-80    -96    
208    -80    
0      384    
64     464    
128    -272   
-272   -16    
80     112    
160    80     
880    1248   
-1776  192    
336    -48    
416    -608   
144    -320   
-96    192    
-448   32     
464    176    
-80    256    
528    -32    
-480   176    
-144   0      
224    192    
480    96     
-688   192    
96     -64    
-64    -32    
112    176    
0      32     
-64    128    
112    -480   
-144   112    
96     -688   
-80    32     
80     256    
352    -16    
-512   112    
512    16     
-112   112    
128    128    
-608   1536   
336    720    
-16    208    
-480   -288   
48     160    
160    -432   
48     -80    
112    -1200  
-320   -48    
0      192    
160    144    
0      32     
-112   64     
176    176    
-288   64     
304    208    
32     96     
-288   -80    
192    176    
-16    -32    
-160   -64    
496    320    
528    -976   
-1488  256    
720    -112   
96     16     
-560   256    
128    -112   
464    192    
-144   112    
-144   -160   
32     240    
32     80     
-256   -64    
64     224    
352    -80    
-496   208    
224    -368   
-32    192    
96     -1040  
-64    160    
-192   -32    
448    752    
-528   -304   
-416   80     
352    160    
160    48     
-176   -112   
368    800    
-912   608    
528    -656   
-96    -112   
64     -608   
240    144    
-64    -496   
144    128    
128    288    
400    16     
-224   -352   
224    208    
-656   224    
192    32     
-32    64     
192    -80    
96     0      
-160   -32    
-48    -96    
352    -336   
-48    144    
-304   -48    
608    736    
-384   -1920  
-2192  -1312  
1248   64     
240    64     
864    96     
-368   192    
-928   144    
976    -464   
-240   32     
208    320    
256    -112   
-416   224    
-48    -64    
336    128    
-128   -48    
-240   -272   
64     192    
128    -80    
-256   -96    
704    -304   
-240   -1088  
-160   -32    
-208   -240   
608    224    
112    -128   
-480   176    
832    -176   
-176   32     
48     80     
-64    288    
112    496    
384    288    
-160   368    
-80    -1088  
-160   -288   
112    -32    
224    -288   
-784   -928   
-176   -512   
320    -672   
-32    -240   
-32    -224   
-16    48     
144    -128   
0      -160   
352    144    
176    -416   
-32    -288   
64     0      
112    912    
96     -240   
-112   -800   
-16    -1008  
176    -864   
-160   -1312  
48     -2512  
128    -560   
-288   -1344  
-640   -2064  
400    -512   
-176   928    
256    -32    
96     64     
96     -16    
-160   288    
-288   -224   
304    -384   
-368   -224   
288    -80    
32     96     
-96    -880   
160    288    
-16    -2208  
-208   160    
272    -368   
-128   -224   
304    -320   
-224   304    
32     64     
208    -160   
-224   -32    
-176   -64    
-368   -112   
352    -480   
-144   272    
496    -176   
-192   -384   
-32    -176   
-256   -32    
112    176    
160    80     
-48    -96    
-128   112    
0      48     
48     -64    
0      64     
-128   -48    
176    16     
-80    112    
48     -176   
128    -480   
-48    -16    
880    -32    
-1456  144    
656    -816   
256    112    
128    -272   
-128   96     
128    368    
-432   272    
-48    176    
320    -304   
-80    -304   
-16    288    
-880   -32    
160    -352   
-64    208    
336    64     
-384   112    
0      -1888  
-16    480    
48     0      
96     -208   
272    -272   
32     -240   
-288   -112   
0      -176   
-48    -192   
240    -32    
-480   128    
208    176    
-64    224    
64     272    
1088   -272   
-1872  -480   
1600   -416   
-416   272    
-416   -80    
-64    48     
240    240    
144    -96    
16     -864   
32     368    
16     112    
-16    -16    
80     -176   
192    352    
-144   -304   
32     112    
-96    -688   
160    -320   
208    800    
-144   16     
-688   -1136  
-720   544    
1248   -320   
-1232  16     
576    496    
176    832    
160    1920   
-816   1664   
80     1776   
624    1392   
-192   672    
288    -160   
128    480    
-432   304    
240    -160   
144    -272   
48     176    
16     -336   
-384   -80    
-16    -448   
320    -32    
-288   112    
-176   -496   
-16    544    
-48    96     
128    1056   
-960   416    
-736   496    
-272   -80    
-144   -128   
224    -96    
-608   32     
-272   -48    
32     -48    
-368   -304   
480    -64    
-16    208    
-544   -320   
672    336    
-480   -192   
-336   128    
112    -208   
-272   -352   
576    -112   
-752   80     
432    64     
-336   -128   
-64    80     
144    448    
-720   480    
336    -2096  
-1376  -960   
432    -208   
256    320    
960    -256   
-1040  -32    
-128   48     
256    544    
352    288    
-256   112    
-224   -96    
112    64     
-256   -64    
-32    448    
144    16     
-512   256    
192    160    
-192   -144   
-32    -144   
128    -880   
-176   1296   
272    832    
-160   48     
-752   -16    
192    112    
96     0      
-128   -32    
-48    0      
-176   112    
144    0      
-1328  -192   
-48    -80    
-80    -144   
-48    352    
-304   -32    
48     176    
-48    -176   
176    112    
-256   -80    
-576   0      
432    64     
96     -16    
-112   16     
-144   176    
-336   144    
-736   384    
384    64     
-672   160    
224    96     
-16    384    
496    272    
-336   160    
-272   -368   
272    -176   
-368   144    
368    -48    
-224   112    
320    -112   
-320   32     
-64    0      
-528   48     
352    128    
-64    -32    
-64    -128   
-80    16     
-144   -48    
-48    64     
-16    224    
192    288    
192    544    
-528   272    
240    -48    
0      80     
-208   0      
176    112    
-160   -48    
112    480    
-704   -208   
32     -512   
-64    384    
-16    0      
-576   -1200  
1776   -512   
-1472  864    
576    -224   
-192   144    
-688   144    
80     -128   
528    -32    
176    -16    
-864   16     
352    -160   
-496   96     
192    96     
-128   144    
-96    -48    
128    -240   
48     144    
-80    208    
112    -128   
-208   256    
112    160    
112    -1072  
-1040  752    
832    48     
-688   32     
160    0      
-128   416    
32     -32    
-128   -192   
80     208    
160    -16    
-304   144    
-32    -80    
-32    -32    
96     80     
-336   80     
448    352    
-384   -16    
-112   160    
80     -176   
-144   224    
176    80     
-32    112    
-160   48     
16     208    
96     16     
-384   160    
64     0      
-80    80     
144    16     
-416   -336   
224    272    
96     -720   
-176   -64    
32     -96    
-192   48     
304    112    
-144   752    
32     576    
-112   384    
-192   0      
160    16     
48     64     
16     64     
304    304    
-720   32     
304    352    
0      -48    
-192   -64    
480    -64    
-128   -176   
-32    176    
64     -400   
-1120  944    
1152   144    
-640   112    
-96    -16    
528    64     
-80    224    
-352   64     
-544   112    
608    48     
-80    32     
-16    96     
-32    160    
-16    96     
-352   112    
288    16     
-48    160    
-160   -176   
288    96     
0      0      
-32    112    
-336   -608   
224    608    
240    -176   
-1136  224    
768    -16    
240    400    
-592   -64    
272    128    
0      224    
128    -32    
-32    176    
-272   32     
64     -144   
352    32     
160    -208   
-80    96     
-416   336    
192    -96    
112    -48    
-144   128    
-320   112    
656    -96    
-48    160    
48     400    
-512   480    
496    -160   
64     112    
368    912    
-1072  448    
800    2368   
1216   -464   
-2432  16     
496    -128   
752    64     
64     -272   
-832   -512   
416    192    
-384   -224   
-16    -144   
544    0      
32     96     
-400   -96    
96     -48    
304    240    
-96    224    
-144   80     
-16    160    
288    608    
-112   1328   
288    1104   
128    -48    
-64    -112   
128    -2032  
144    192    
16     32     
-448   176    
176    464    
256    688    
96     320    
-96    272    
0      192    
352    80     
-80    304    
64     528    
-16    -176   
-16    -32    
304    -112   
160    -576   
-176   592    
336    592    
-64    -160   
176    96     
432    464    
-992   -1072  
64     -560   
144    -144   
128    16     
112    416    
-224   -144   
192    64     
560    896    
-992   416    
240    -368   
528    1472   
-592   208    
80     -464   
-368   -928   
224    544    
128    -272   
-176   -32    
0      -96    
144    304    
-224   240    
480    -80    
336    0      
-128   -80    
144    -80    
-256   -192   
-272   384    
80     -224   
0      96     
0      80     
-160   112    
160    48     
208    160    
-240   64     
-160   128    
176    -112   
16     -96    
-32    160    
-192   -192   
240    -576   
144    -384   
304    112    
-272   -720   
160    128    
-128   -96    
-16    304    
-272   432    
0      112    
80     -80    
48     16     
128    240    
16     -896   
-112   240    
16     -560   
352    144    
-32    32     
-128   160    
32     -400   
-368   -272   
1120   -592   
-160   704    
128    -112   
-304   368    
96     224    
-96    -416   
288    -496   
48     -304   
-16    240    
-48    16     
-16    0      
496    -560   
-64    16     
-96    -384   
128    208    
176    208    
128    -1696  
-272   304    
288    -1728  
-192   -400   
0      144    
32     -304   
416    0      
-224   -352   
-288   -96    
32     304    
192    -112   
-208   -208   
624    -272   
-480   -1280  
2160   -1424  
-1104  -272   
816    -432   
-224   -1120  
-320   160    
368    128    
608    -192   
-112   1744   
-288   -768   
-16    80     
432    -2496  
-32    -672   
-144   -160   
-288   368    
416    -16    
-64    32     
48     -128   
-368   -272   
448    224    
-160   -224   
560    1456   
-1344  -656   
-336   304    
304    -1696  
-1456  -1856  
416    -640   
544    -368   
-400   -608   
384    304    
0      -304   
-112   176    
-64    -112   
16     -128   
512    -128   
-160   0      
-288   32     
272    -448   
80     16     
208    -144   
32     -144   
-480   16     
160    -208   
592    -704   
-448   -80    
0      256    
-48    336    
-480   -416   
752    0      
-160   80     
48     -32    
64     -64    
-576   208    
-496   -80    
16     80     
608    -176   
352    592    
-912   176    
432    192    
-560   432    
-240   160    
96     144    
-16    -256   
208    -80    
144    64     
-64    -288   
0      -96    
320    96     
-352   80     
-128   -48    
-608   -1264  
1440   -2080  
-2016  -608   
528    512    
576    -144   
304    -80    
-96    176    
-672   -192   
320    336    
-112   -320   
624    128    
48     0      
-160   -64    
128    -160   
0      -96    
48     -48    
64     176    
-496   0      
16     -16    
32     -464   
880    -336   
-320   -144   
-208   144    
112    304    
288    -32    
-272   -304   
-16    64     
320    -128   
-1056  -144   
608    -336   
-64    128    
128    -112   
-208   144    
64     -576   
-256   -16    
416    -720   
-640   352    
288    224    
-752   -224   
224    160    
352    32     
-608   112    
528    64     
-576   -64    
80     32     
-336   0      
-240   -224   
496    48     
-208   -256   
144    -16    
384    32     
-112   16     
-288   224    
320    224    
-1248  160    
736    112    
-288   -112   
-336   16     
272    304    
128    -80    
96     -48    
144    -144   
256    336    
-112   -96    
-224   112    
-176   -192   
-192   -160   
-128   48     
-192   368    
128    320    
-192   -464   
-224   -16    
208    272    
-416   -96    
480    -368   
0      -48    
-384   48     
-112   -32    
-48    320    
48     272    
-368   -192   
112    -160   
96     32     
-1264  112    
2000   -1536  
-1216  32     
-192   -320   
576    160    
192    448    
-1008  784    
128    0      
80     -800   
-112   448    
208    -96    
-400   -224   
-240   352    
240    -368   
128    0      
0      224    
-624   96     
48     -160   
192    -16    
-208   64     
-192   256    
-256   -912   
-128   512    
1088   -256   
-336   80     
-208   -96    
-272   144    
208    -176   
128    32     
64     224    
-192   -112   
-272   -16    
64     96     
48     -80    
-528   -112   
160    -160   
-976   -288   
-240   -112   
432    -368   
-144   48     
160    176    
-96    272    
128    64     
-288   48     
320    48     
-400   288    
384    144    
-224   176    
112    -48    
-240   -496   
1984   2224   
-3184  1088   
-592   480    
1616   -32    
-880   -128   
32     64     
-192   -208   
256    -448   
-464   -496   
176    112    
16     96     
-256   128    
-32    64     
128    48     
-464   128    
656    272    
-560   0      
224    64     
-208   -48    
272    400    
272    368    
-384   -544   
1168   464    
-1248  -112   
784    32     
272    1264   
-112   928    
160    -304   
-144   256    
224    -48    
-32    176    
-368   32     
-48    -208   
-1424  -128   
384    128    
-320   128    
656    16     
-352   208    
224    384    
32     128    
-240   -80    
96     -48    
-16    -64    
448    464    
48     160    
464    -192   
-480   112    
-368   -976   
384    112    
-32    128    
-160   304    
768    -32    
-208   -96    
160    208    
-176   160    
-32    -32    
128    336    
464    -48    
-160   -208   
-528   416    
336    -144   
-16    -608   
-224   272    
272    -32    
-48    240    
-224   384    
272    208    
-672   448    
-16    -144   
-288   176    
336    176    
-608   -992   
720    -1456  
768    320    
-960   432    
-368   224    
416    64     
96     -240   
-240   1744   
496    1184   
-816   704    
32     -752   
464    496    
-224   -96    
112    144    
-224   -16    
368    -208   
80     -336   
-448   -64    
-32    240    
176    608    
-64    336    
64     -64    
-144   -192   
352    -224   
-336   304    
448    336    
-208   -144   
-272   240    
-48    368    
-96    432    
400    176    
-464   256    
96     192    
-320   -288   
192    -784   
-528   -992   
176    -128   
-368   384    
208    160    
336    976    
-352   -192   
-96    32     
0      64     
144    96     
-16    -64    
144    208    
-48    -304   
-144   80     
480    48     
-272   800    
-48    48     
16     128    
-320   -1472  
0      -192   
208    448    
528    768    
32     288    
-368   -1888  
960    -704   
-16    1536   
-176   768    
-272   -592   
96     -16    
208    304    
-144   -656   
-80    64     
-64    -48    
384    112    
160    -48    
-384   32     
-144   256    
-112   112    
-80    160    
128    -80    
-112   64     
128    224    
-16    -112   
160    -48    
352    -384   
-336   -464   
80     192    
-112   208    
-144   -144   
496    0      
-144   480    
304    -160   
-400   464    
256    480    
-160   512    
64     272    
96     288    
-240   -304   
240    -208   
256    -176   
48     -400   
-160   80     
160    -48    
-80    -96    
48     -32    
96     240    
208    224    
-176   304    
-400   -272   
992    -864   
-160   224    
336    80     
-64    -544   
-464   32     
-160   768    
368    208    
400    -192   
-160   -544   
-496   896    
176    192    
816    -368   
-288   -256   
-416   -64    
64     -224   
464    576    
240    -480   
-240   704    
-224   -320   
128    -80    
288    80     
240    -400   
-416   -160   
-80    -256   
256    336    
32     240    
96     -32    
-320   -80    
-160   -368   
-416   -1552  
1952   -1552  
-752   128    
336    432    
-176   -112   
-176   448    
848    -32    
-240   -288   
128    272    
-144   -624   
512    32     
-336   16     
176    48     
-96    -80    
96     160    
-96    -48    
0      80     
-80    -160   
-256   -144   
96     112    
96     32     
-32    128    
-256   608    
1424   16     
-512   -368   
-48    16     
48     448    
752    512    
-720   -592   
496    -80    
32     240    
-144   64     
496    -32    
-80    224    
-368   32     
384    96     
-48    80     
112    -512   
-32    272    
-80    -576   
64     96     
320    -48    
160    768    
-960   -48    
352    64     
-512   -16    
544    -176   
240    240    
208    -400   
0      -368   
-352   96     
192    32     
-240   -16    
320    32     
288    -240   
112    0      
-288   288    
336    480    
48     0      
-176   -208   
272    -336   
80     -288   
240    80     
176    -224   
144    -1520  
-176   -128   
192    -336   
160    288    
480    96     
-400   -16    
320    736    
1072   1552   
-1072  1216   
1104   1008   
768    -112   
-640   96     
-32    160    
288    -368   
352    -544   
-288   -2032  
480    -32    
368    -704   
-192   144    
-176   256    
256    -240   
-160   96     
-32    -208   
96     -512   
-32    112    
-16    -160   
-32    352    
704    -336   
-912   240    
-592   -336   
496    -224   
736    -80    
-128   -416   
-32    192    
96     -208   
-48    96     
384    80     
-192   -16    
-352   -80    
16     -80    
80     -48    
96     -64    
256    96     
-80    -304   
-704   -192   
576    192    
-784   144    
432    48     
-64    -176   
-304   -848   
80     64     
32     0      
160    48     
64     208    
464    592    
-96    48     
-400   -96    
288    -240   
-256   -176   
-240   -704   
-1136  -80    
656    -288   
-288   -256   
176    -96    
224    288    
240    48     
-16    -912   
-288   96     
208    -256   
-32    32     
-80    -240   
96     96     
-176   -80    
32     64     
-160   -240   
-16    -32    
-1024  -160   
-192   176    
176    160    
480    -208   
-336   -160   
-352   -96    
128    320    
256    224    
208    80     
-288   144    
0      160    
32     -80    
144    -192   
-1040  -192   
2384   -912   
-1488  -48    
-448   -384   
1056   192    
-128   -32    
-240   -64    
16     -576   
-176   608    
80     -880   
16     -192   
-64    112    
16     -176   
80     368    
-336   192    
336    -304   
-368   224    
-528   -144   
16     -288   
-176   0      
64     48     
-608   -672   
176    304    
912    416    
-256   -1440  
-64    48     
-368   -560   
400    -16    
-32    80     
-32    48     
-272   208    
32     -144   
176    80     
-304   32     
128    144    
160    -160   
144    112    
-48    -48    
176    336    
-208   -272   
64     -224   
176    -32    
0      32     
-176   48     
-160   -240   
144    16     
176    -160   
-96    192    
16     64     
32     16     
1216   112    
-2896  896    
1008   304    
0      -256   
-624   -336   
576    -208   
-752   -160   
-176   -432   
128    -272   
176    0      
48     0      
-240   -80    
-32    160    
96     -336   
144    48     
-1136  -512   
-400   144    
-192   -256   
96     240    
240    -32    
-416   32     
144    -944   
-1472  304    
560    -592   
-256   -288   
672    -320   
-96    -192   
-32    -432   
112    -432   
-128   256    
-304   -128   
208    64     
-304   -48    
-144   0      
112    160    
224    112    
-176   16     
-416   544    
288    64     
-112   -32    
80     16     
-1120  96     
-96    304    
128    64     
-96    0      
256    432    
-256   128    
-720   -1920  
-320   -816   
368    -320   
-816   144    
176    128    
-272   -256   
96     -160   
-432   256    
368    -16    
-512   -976   
96     128    
-304   -288   
-160   -80    
96     336    
-32    192    
-64    -304   
-208   -192   
-32    -48    
32     -64    
240    1072   
448    320    
-32    64     
-192   448    
-176   224    
48     -96    
1200   -1264  
-576   -976   
1328   592    
-848   784    
-896   480    
928    272    
128    -336   
-80    736    
-608   -912   
176    672    
128    -224   
-112   -32    
0      128    
-352   -80    
272    640    
-16    304    
-384   -352   
128    -336   
-112   -800   
-192   -432   
128    832    
112    16     
416    160    
-256   272    
-400   48     
-80    -640   
480    864    
0      464    
16     -576   
-240   800    
-16    240    
-208   16     
16     -48    
-288   32     
-256   544    
320    240    
96     96     
-464   -608   
112    144    
256    336    
-96    -48    
128    -496   
-80    112    
-128   -112   
-480   -864   
96     176    
-64    624    
-464   -1248  
-192   -144   
32     -352   
-256   -128   
144    -752   
-496   -752   
368    -160   
-144   352    
-288   0      
-144   -80    
96     -64    
160    -176   
-112   -64    
-48    48     
-256   0      
144    -48    
-176   96     
-32    16     
272    224    
-80    64     
-176   -304   
-352   576    
16     288    
-512   -224   
224    400    
-16    -16    
16     544    
160    336    
-512   -48    
384    144    
-16    624    
-192   -80    
208    -48    
-240   256    
704    736    
416    352    
-384   -864   
240    -416   
-336   -448   
256    -832   
352    528    
-80    864    
-128   288    
32     -64    
80     -160   
48     704    
0      -224   
-192   464    
160    96     
64     -16    
-48    144    
-176   176    
0      -80    
192    256    
-256   1024   
304    -256   
-320   -208   
-96    -16    
304    608    
128    112    
-208   48     
-160   192    
-32    48     
176    448    
64     -240   
-160   144    
64     -480   
32     96     
16     144    
64     80     
32     384    
112    32     
-160   -272   
48     48     
-64    80     
-32    48     
-32    208    
32     160    
64     480    
448    432    
-64    -64    
-16    16     
160    16     
-960   -528   
1216   -304   
496    -352   
-608   -128   
80     160    
320    224    
-96    -32    
432    480    
-208   464    
0      256    
320    32     
-48    112    
-96    -32    
-240   -64    
560    32     
-208   0      
96     208    
-48    -32    
-112   -48    
-144   -416   
-176   -2960  
192    192    
48     112    
-1680  912    
1232   32     
-496   -208   
-464   64     
816    96     
-496   -48    
368    480    
336    0      
-32    -32    
176    80     
-128   176    
-16    -144   
-304   -608   
288    64     
48     -48    
208    416    
-144   608    
32     352    
96     -16    
96     -80    
544    -112   
-976   560    
704    -288   
48     400    
-224   544    
-64    -32    
-384   784    
-496   32     
-368   -144   
896    -192   
-288   -96    
-32    48     
416    512    
-352   672    
144    240    
0      576    
-16    496    
80     224    
432    -32    
304    -48    
16     176    
-208   64     
128    -112   
64     -416   
0      352    
160    224    
240    80     
-784   -704   
544    -1728  
1728   -2688  
64     1216   
256    720    
-1024  -16    
1200   256    
160    -144   
-192   160    
320    240    
-704   -240   
192    272    
80     -288   
64     112    
-32    96     
-208   128    
112    160    
96     160    
0      -112   
-112   144    
784    336    
-1248  352    
864    288    
-256   -208   
416    48     
176    -80    
-512   32     
736    400    
-368   240    
-48    224    
592    -80    
32     144    
-144   112    
160    176    
-144   48     
16     128    
688    128    
-608   -16    
512    -256   
80     16     
208    -96    
112    176    
-160   -528   
528    240    
-256   -544   
400    -128   
-96    560    
-160   288    
48     240    
192    32     
-288   128    
336    256    
-224   144    
352    368    
-64    112    
-192   0      
496    352    
-160   -176   
32     64     
-32    16     
128    384    
400    80     
-48    224    
-208   96     
240    160    
0      128    
96     80     
-32    64     
-32    -432   
400    80     
-80    16     
304    864    
192    320    
-272   96     
176    -368   
-96    64     
-16    240    
272    128    
48     208    
144    944    
-16    624    
-160   80     
176    -1360  
192    -2240  
-1264  1680   
1472   -304   
-1344  -272   
1216   -480   
-256   496    
-272   -400   
-192   -112   
272    -208   
288    -816   
-256   -16    
64     -160   
128    -304   
80     -304   
128    -1216  
96     -80    
-144   496    
320    -240   
16     112    
-16    -240   
-192   -64    
544    32     
208    32     
-352   208    
64     -96    
0      432    
-384   656    
144    -320   
-400   -96    
-80    -400   
64     64     
192    -16    
0      128    
-96    -880   
240    -256   
16     -192   
64     304    
-16    -304   
80     -16    
-80    -560   
-208   -256   
64     128    
192    -192   
-784   -176   
112    96     
-48    -384   
144    -176   
80     208    
-48    -432   
-224   -384   
-80    -1696  
2000   -848   
-1296  -400   
464    80     
624    -480   
-528   32     
800    480    
368    2336   
-736   576    
352    -672   
-128   -672   
64     -96    
-32    32     
32     -432   
288    -256   
-112   -928   
-224   400    
32     -144   
192    368    
-192   608    
224    528    
480    864    
-1280  -672   
-432   272    
1104   1280   
-672   -224   
-416   -1344  
304    -752   
-192   432    
-160   224    
192    272    
224    560    
-208   400    
112    -144   
-176   -144   
128    -256   
-288   -64    
128    -208   
-176   -992   
-288   -560   
-80    368    
32     464    
-112   288    
256    -176   
-432   464    
512    512    
16     1488   
368    -2880  
-224   720    
544    1424   
-256   1312   
-496   -544   
736    -288   
32     448    
-352   160    
96     400    
432    80     
80     -64    
240    -176   
-800   -64    
640    496    
-288   48     
-176   -256   
192    -32    
80     304    
240    -160   
432    -128   
160    -128   
-368   -240   
304    -928   
0      -16    
288    80     
-608   1808   
1232   -624   
-1360  160    
-496   -832   
768    96     
208    320    
416    1312   
-1008  784    
288    -1072  
288    -64    
272    176    
-32    448    
-352   208    
-128   0      
512    -192   
-176   144    
0      -320   
-96    224    
64     -224   
48     272    
0      64     
-48    16     
320    288    
-304   304    
160    544    
208    -32    
-656   96     
208    592    
352    1472   
192    128    
-48    -208   
-1232  -352   
-304   256    
336    -256   
-144   -176   
16     32     
-176   -96    
96     336    
304    912    
-96    48     
-48    -144   
-272   48     
96     80     
144    16     
-304   -672   
-144   656    
-32    704    
-208   656    
96     432    
-208   -544   
-16    -528   
-592   80     
752    80     
-432   -288   
-272   400    
272    80     
48     -784   
-400   -288   
96     752    
-144   800    
0      768    
-128   -208   
192    -80    
16     -144   
-160   176    
32     160    
80     192    
-80    112    
544    -96    
-96    -176   
-224   -48    
224    -16    
-112   -64    
32     -48    
-16    -160   
-112   96     
144    -64    
-64    592    
64     0      
-128   -352   
48     16     
-960   224    
1072   -448   
-1120  160    
720    -656   
-64    -240   
-192   -80    
96     -464   
-80    -48    
-176   -448   
-160   -16    
272    -256   
-144   -16    
32     112    
128    512    
128    288    
-128   224    
-128   0      
-160   -224   
-144   0      
160    -16    
192    768    
-1168  -256   
640    32     
-640   -256   
-192   -224   
96     -48    
-272   176    
64     480    
96     -64    
80     192    
-64    -96    
-80    48     
32     -48    
16     32     
16     64     
-240   192    
32     -128   
-208   224    
304    -192   
-624   96     
352    -16    
-48    112    
-16    208    
64     64     
-208   320    
272    336    
416    224    
-432   96     
288    48     
32     32     
-1456  -1904  
-624   -432   
832    -448   
-1472  -80    
544    368    
944    48     
-640   -160   
-416   -32    
480    208    
-144   16     
-112   96     
192    176    
-272   32     
-48    -16    
0      -48    
80     0      
-400   -16    
192    176    
128    -96    
144    -64    
-272   0      
416    512    
640    -32    
-1776  192    
736    -928   
560    304    
-144   -80    
-576   144    
720    128    
-400   -96    
240    96     
48     144    
-48    176    
-128   -48    
-368   112    
928    -16    
-336   304    
-80    352    
368    32     
-160   224    
16     32     
-64    128    
32     160    
-816   176    
1168   32     
-992   16     
512    112    
48     400    
-480   160    
480    -16    
272    432    
-224   240    
-96    16     
256    176    
160    -48    
112    144    
-288   608    
384    -80    
704    16     
-208   336    
-112   80     
224    80     
112    176    
128    -32    
-112   160    
-240   -112   
752    -224   
-192   48     
384    -48    
-208   128    
256    -384   
-1856  2528   
2064   -32    
-1488  -208   
-832   -432   
832    -128   
-32    400    
320    32     
-368   544    
-256   112    
32     320    
656    16     
-160   16     
-176   64     
-64    208    
384    272    
-96    0      
-320   112    
240    -32    
-560   -144   
1104   -560   
-672   -16    
448    32     
-560   -48    
-320   -32    
432    32     
-272   240    
208    48     
-64    -32    
32     448    
480    368    
-288   224    
144    -128   
-96    80     
176    128    
-32    -96    
-304   -160   
80     128    
-304   -208   
304    48     
-128   208    
96     208    
272    64     
-112   224    
448    -96    
-624   80     
-224   144    
464    208    
48     32     
-176   -176   
-48    96     
144    48     
-80    -848   
400    -128   
208    544    
304    1920   
416    784    
-240   -192   
-176   -80    
-64    0      
96     -176   
-272   -96    
-144   -64    
-32    48     
144    48     
256    96     
-32    144    
0      -80    
-192   320    
208    192    
-48    80     
-96    0      
-16    -128   
48     1344   
368    112    
-864   -80    
240    -64    
-16    496    
560    208    
-352   -448   
-112   -688   
16     176    
544    1376   
-1168  -768   
-48    -800   
864    976    
-720   -208   
16     432    
144    -1024  
-128   -1120  
240    592    
-160   -416   
240    272    
-16    304    
32     160    
-144   96     
-16    144    
-48    -240   
0      -208   
128    16     
48     192    
16     16     
-304   -528   
896    -1440  
-48    624    
-288   -352   
400    -224   
-208   64     
224    -672   
48     -1024  
-208   32     
-288   768    
16     -64    
128    128    
96     -752   
48     80     
112    48     
144    0      
240    96     
-144   448    
-432   128    
592    -624   
144    -272   
-320   432    
-48    192    
64     176    
-16    -80    
288    -512   
-48    160    
64     -704   
16     256    
-16    -544   
-640   -448   
1696   -336   
912    768    
-1408  -528   
1088   -832   
-256   -144   
-192   -176   
1040   208    
-16    976    
-512   -304   
32     -288   
320    112    
0      -96    
-64    128    
128    80     
128    112    
128    144    
-80    160    
32     272    
48     32     
-112   -176   
624    -576   
-1728  1648   
896    -1120  
-208   -1040  
256    -1120  
16     16     
-688   -768   
688    1344   
32     768    
-352   -80    
192    -720   
64     448    
-32    528    
-320   144    
208    -512   
-304   256    
448    -208   
-320   -192   
-16    288    
208    -288   
-240   32     
128    -112   
240    16     
-528   -992   
-352   -2640  
512    128    
-384   -2336  
976    -2432  
-624   -1600  
304    64     
112    736    
-336   -16    
96     496    
-448   -688   
1024   -736   
-352   160    
144    -768   
80     -608   
-320   -384   
688    -640   
-80    -80    
-48    208    
-304   -144   
-464   -208   
144    -320   
-272   32     
-96    -160   
-224   544    
368    208    
-160   80     
1072   1072   
-1232  912    
416    -672   
1280   -1184  
-1168  -432   
-112   400    
176    544    
368    560    
160    1632   
-320   -368   
-1040  -272   
432    208    
32     160    
-208   48     
-144   -144   
-160   -1472  
176    -512   
-96    112    
-336   384    
272    1088   
272    896    
288    208    
-208   -528   
-656   288    
208    -496   
336    -336   
112    576    
192    880    
-352   -32    
96     -112   
240    -32    
-128   -128   
144    -576   
224    368    
112    592    
64     -16    
-128   -448   
304    160    
-48    608    
80     224    
128    -160   
-192   -240   
-1328  96     
0      -80    
-160   0      
160    96     
80     400    
16     -464   
-384   -64    
464    384    
-32    352    
-128   -480   
528    -544   
-784   -96    
-144   -112   
192    -192   
-256   -336   
32     -496   
-32    -448   
80     112    
240    -320   
-224   80     
256    -512   
96     448    
-256   -352   
144    80     
32     -512   
-288   -432   
-64    -976   
-304   -512   
-144   -144   
352    -96    
160    96     
-272   -192   
-112   96     
208    -464   
-160   -240   
160    -272   
192    176    
-112   -864   
64     -48    
640    -976   
-1392  1200   
1168   96     
-320   368    
464    -16    
-464   -112   
-176   -128   
-64    -368   
-32    -320   
528    -384   
-240   336    
-144   -240   
272    160    
-64    -96    
-48    -576   
-64    -256   
-288   592    
240    -144   
-176   -160   
16     -352   
-96    224    
144    1696   
464    -192   
-640   -128   
688    -240   
-160   -112   
-912   224    
128    304    
48     176    
-336   32     
-16    32     
448    80     
-208   64     
-64    -112   
-80    16     
-16    16     
-16    384    
320    96     
-128   -16    
0      -272   
-208   64     
-176   -144   
224    112    
-16    64     
-64    -160   
-512   128    
512    48     
-608   112    
528    -64    
-192   -32    
1296   672    
-1184  592    
-240   -512   
48     -496   
112    -288   
-48    -144   
-640   -144   
432    -160   
-272   64     
288    -16    
-32    80     
144    128    
-368   -32    
-128   0      
528    48     
-400   -80    
-112   80     
-16    144    
-112   -16    
-64    -192   
160    32     
-128   64     
400    848    
1056   -128   
-1344  112    
1584   592    
0      0      
-864   -64    
832    64     
-528   256    
-1456  -144   
176    160    
-160   64     
-32    16     
112    -64    
192    208    
336    -16    
-288   160    
0      -144   
-32    -352   
-48    -48    
-224   32     
336    880    
-1056  -368   
-480   256    
432    -144   
-1008  272    
208    80     
304    -112   
0      -624   
-480   288    
192    240    
-48    -224   
288    -320   
-208   16     
-160   -96    
-816   384    
528    -320   
-384   -416   
304    0      
176    -128   
-608   256    
480    -176   
-64    112    
48     -64    
-32    -96    
320    224    
-416   0      
-128   112    
304    0      
-368   48     
-1088  -3600  
-608   272    
1584   720    
-608   0      
272    256    
32     224    
-688   192    
0      16     
96     -144   
512    -192   
-224   144    
-32    -80    
32     144    
-288   32     
384    48     
0      176    
0      112    
-320   48     
-48    -48    
320    128    
16     -720   
-560   -752   
48     208    
-384   48     
-96    464    
752    128    
-608   368    
224    -96    
-32    112    
-48    -176   
320    -16    
-288   128    
-208   -256   
-128   160    
160    -128   
240    256    
-336   592    
672    480    
-368   160    
16     -16    
160    48     
-128   -400   
272    -624   
-160   160    
0      624    
224    352    
-304   432    
128    240    
32     -176   
-368   -560   
432    -80    
-496   -144   
416    32     
0      272    
112    336    
240    208    
-352   -80    
304    1328   
528    1088   
0      688    
-32    224    
160    688    
-224   400    
96     256    
0      -144   
32     -96    
-32    400    
32     96     
16     -144   
96     256    
160    464    
16     432    
80     -48    
-80    96     
144    -32    
-144   -192   
144    0      
-272   -368   
176    400    
-96    64     
112    96     
96     128    
-464   544    
176    192    
-160   -544   
-368   -448   
176    0      
-80    -80    
192    -704   
256    -192   
-16    -96    
112    208    
-96    -96    
48     32     
-160   0      
48     272    
192    192    
-64    -80    
-272   96     
64     80     
192    -112   
208    -144   
-656   544    
800    -288   
-976   128    
416    -192   
144    240    
-208   400    
80     304    
-224   -192   
240    -96    
192    32     
-48    144    
-320   352    
64     -144   
192    -32    
128    336    
0      128    
-32    0      
-256   192    
48     -32    
240    224    
-128   -96    
-352   64     
96     240    
256    -240   
-256   240    
176    64     
-64    16     
-352   112    
352    48     
256    112    
-1728  672    
2240   -656   
-704   64     
-592   -432   
912    192    
640    -32    
-800   1312   
592    -272   
-608   -2288  
-48    -768   
160    144    
96     880    
-384   -688   
192    368    
208    -240   
16     -32    
-144   -304   
48     336    
112    16     
48     448    
-176   -576   
1312   -784   
-1888  640    
816    672    
-128   496    
-640   -640   
432    -2096  
144    -1040  
-96    1072   
304    1776   
-160   -160   
-16    -96    
272    -192   
-112   64     
80     128    
-368   64     
48     16     
80     864    
-416   592    
240    -304   
0      -1072  
112    -64    
-48    -224   
128    816    
336    352    
-560   80     
400    -272   
-384   1008   
992    -80    
-208   448    
-272   -208   
624    96     
-224   -16    
352    -416   
128    688    
-160   -400   
-224   464    
144    464    
96     -80    
0      -80    
-160   -112   
-64    32     
752    400    
-272   -48    
-368   320    
160    -656   
-528   96     
496    160    
-448   -240   
-48    128    
-16    -1744  
832    -2448  
256    0      
368    352    
-1120  -928   
160    736    
544    64     
-256   112    
-192   784    
400    288    
48     192    
-48    -224   
16     64     
-80    512    
176    128    
160    -400   
32     32     
96     -208   
-160   208    
464    16     
-192   -1184  
-304   -752   
112    -224   
304    416    
176    -528   
-272   112    
320    -272   
-96    336    
304    -176   
48     -16    
-48    -48    
80     272    
-96    -144   
48     -192   
336    32     
336    80     
-256   -288   
-528   -800   
304    -224   
96     -240   
16     64     
-16    -192   
-432   -256   
416    -496   
304    64     
-32    -144   
96     320    
-208   160    
64     240    
288    144    
-176   -1552  
-144   -48    
-112   -2640  
-528   -1952  
544    544    
-96    -1840  
-272   -48    
496    160    
-320   -208   
48     160    
112    -224   
-64    288    
240    -16    
-208   -160   
16     272    
240    -352   
48     -320   
-656   48     
208    64     
336    -208   
-624   -912   
448    -608   
-48    -656   
48     288    
-16    48     
48     -144   
208    -176   
96     480    
224    -32    
-224   -32    
144    96     
144    112    
-528   1328   
2816   -1168  
-1744  272    
304    -480   
352    176    
320    224    
-480   16     
16     -256   
272    -512   
-208   -416   
416    -160   
-144   48     
-64    144    
-32    -480   
448    -144   
-176   448    
80     -640   
-832   112    
192    96     
-48    96     
752    -112   
-1616  784    
912    -736   
-96    -144   
48     128    
368    -96    
-448   208    
-16    16     
-160   80     
816    -352   
-656   80     
-192   -272   
-304   272    
768    -304   
-64    -176   
-128   -112   
16     -48    
64     112    
96     0      
-176   -1424  
112    48     
-32    -112   
96     64     
-144   0      
320    48     
-752   32     
496    112    
-560   -80    
128    -80    
-704   -1312  
592    3984   
2800   672    
-1952  -176   
-192   -400   
432    -192   
80     -64    
144    -176   
176    -304   
-80    32     
-464   144    
256    32     
448    -64    
144    -16    
-432   -144   
192    80     
128    0      
-416   16     
192    -400   
-32    -288   
64     -800   
64     112    
112    160    
-1088  1040   
848    128    
-176   704    
656    160    
-48    288    
-32    -32    
-448   -64    
-208   96     
464    -224   
-192   96     
80     -304   
-32    112    
144    -400   
-176   80     
256    -448   
-144   -288   
16     -208   
224    -128   
-224   96     
64     32     
-448   112    
1072   80     
-512   224    
-64    -96    
432    16     
-128   -48    
128    48     
-112   -208   
-224   336    
400    32     
-320   -256   
96     -192   
192    688    
-512   -96    
-32    64     
256    192    
-416   -144   
48     -16    
-128   112    
-16    48     
48     16     
192    48     
-64    -208   
32     16     
-544   128    
-32    -112   
-128   32     
32     16     
-32    -608   
1728   -2240  
-608   512    
-80    -112   
-672   256    
688    80     
-48    336    
-640   -192   
-224   144    
-256   -400   
-432   -208   
224    112    
-416   -320   
96     272    
-320   64     
128    368    
-608   32     
48     -16    
-160   -16    
16     752    
-80    -192   
-64    -320   
32     -512   
-112   160    
544    -80    
-592   272    
288    80     
-192   -288   
-272   -384   
64     -400   
-192   304    
176    800    
-80    752    
32     240    
96     -80    
-224   -448   
144    96     
-320   416    
272    400    
240    112    
-256   -48    
64     -256   
176    -208   
-224   208    
-32    400    
-448   -48    
240    -528   
-160   -432   
-240   -1024  
160    -640   
-336   240    
384    320    
224    -736   
-464   352    
592    672    
-944   272    
576    608    
224    448    
128    -1136  
-128   -784   
-32    1584   
208    -384   
-144   -80    
-128   -48    
176    224    
-384   -96    
144    288    
32     0      
48     48     
-64    496    
-16    80     
144    -48    
64     80     
32     80     
-304   64     
16     0      
32     -128   
32     320    
-64    48     
-400   160    
-368   -96    
128    64     
-96    -192   
112    -384   
-384   128    
752    224    
32     128    
-128   -96    
-288   -112   
448    -496   
64     336    
160    224    
-304   96     
-80    -80    
160    176    
-432   -48    
-240   208    
-16    128    
-144   448    
208    240    
160    0      
-176   -16    
832    128    
-1728  304    
752    -48    
240    16     
80     -240   
-128   160    
-496   -256   
336    352    
-528   256    
336    -144   
288    32     
-144   320    
-352   96     
48     -48    
400    -64    
-16    176    
-176   112    
-176   640    
272    64     
-192   -16    
-176   128    
16     -336   
336    208    
-288   336    
240    272    
-304   192    
-336   80     
256    -48    
368    96     
-400   112    
752    -48    
-2768  160    
672    48     
32     192    
96     80     
64     1184   
-480   272    
-64    -928   
576    192    
-336   560    
-288   128    
96     -192   
64     192    
32     80     
112    -336   
-112   48     
-144   32     
-176   -720   
224    384    
-112   -128   
-176   80     
832    1136   
928    192    
-1056  608    
1008   -1136  
-992   -496   
432    -224   
-192   400    
704    320    
-240   -64    
32     -256   
-48    -32    
304    208    
-48    112    
-336   64     
800    128    
-432   128    
480    592    
-512   464    
-400   -32    
384    -32    
80     -128   
464    368    
-576   -1552  
1552   -2272  
-528   -848   
-368   576    
752    864    
-464   -192   
-128   -112   
624    352    
-112   16     
-288   -64    
-32    -432   
64     368    
336    832    
848    -208   
-496   -512   
400    128    
64     224    
320    -352   
-336   352    
448    -48    
-32    272    
-128   96     
80     -352   
-512   352    
368    48     
-352   112    
-352   -1168  
-160   -1648  
1712   0      
-576   128    
-688   16     
-16    288    
80     -112   
-128   -320   
-288   -256   
-656   112    
240    -16    
224    352    
-32    96     
-240   208    
32     -32    
16     0      
448    128    
-176   96     
64     192    
80     32     
-272   912    
560    720    
-544   752    
288    80     
192    16     
-224   64     
160    96     
32     192    
-48    -384   
32     48     
400    208    
-560   144    
160    384    
240    96     
-608   -80    
560    32     
-48    0      
112    -256   
-432   -288   
192    -112   
-128   224    
64     -96    
-80    48     
400    -272   
-336   0      
256    112    
96     64     
-64    -128   
128    -48    
-144   64     
240    144    
-64    -144   
0      144    
-352   -1232  
-528   208    
688    368    
-272   -144   
80     160    
240    0      
144    192    
-48    160    
-176   224    
160    176    
-80    48     
-112   -272   
256    160    
-80    0      
32     -176   
-48    -384   
64     80     
-192   -256   
-112   -128   
176    144    
80     -448   
0      192    
128    -704   
-128   384    
288    -416   
32     192    
80     64     
48     -48    
-48    208    
-464   -704   
1968   944    
-320   736    
-448   32     
-144   560    
32     -176   
64     -48    
304    0      
256    592    
-80    -16    
-192   -544   
240    320    
208    -208   
-64    160    
48     224    
64     208    
80     -176   
64     432    
-64    -32    
-16    -272   
144    64     
-160   -624   
528    -512   
-528   64     
208    -32    
320    -816   
-128   0      
368    -288   
-176   304    
-272   240    
192    48     
208    192    
-112   -496   
-64    -64    
0      0      
320    32     
-176   0      
-144   160    
112    240    
-16    96     
32     -288   
208    48     
32     208    
-288   32     
32     16     
0      144    
592    160    
-480   -208   
192    32     
-224   -16    
1152   -32    
-128   704    
-656   784    
1200   448    
96     176    
-1184  -192   
640    80     
-80    -48    
240    -544   
-128   -176   
240    -288   
-224   -1344  
-128   0      
128    -784   
-80    -656   
144    80     
32     -336   
-112   304    
0      176    
336    368    
336    256    
-496   -544   
928    512    
-304   112    
-96    352    
-752   336    
112    -464   
144    80     
480    -32    
160    -224   
-240   -368   
-32    -176   
240    112    
80     48     
16     -736   
-192   256    
576    -592   
-208   128    
80     96     
-208   -128   
400    -352   
64     -480   
-32    -80    
480    -448   
-32    176    
160    -608   
-656   464    
272    -1616  
-16    -192   
384    0      
48     96     
48     -64    
-16    32     
-816   352    
800    -384   
-256   -128   
-16    208    
48     -96    
-352   -480   
272    32     
176    -160   
144    -16    
-112   -784   
32     16     
-16    -64    
256    80     
-304   -432   
112    48     
48     160    
-288   32     
-560   -96    
2384   2336   
-1936  1984   
752    -240   
1136   -256   
-528   -160   
-672   -240   
-48    0      
800    -32    
176    -1232  
-48    -272   
112    -960   
-48    368    
128    496    
160    32     
-416   160    
64     208    
-32    16     
368    -176   
-224   -144   
208    592    
16     544    
112    16     
176    -272   
-416   -960   
144    -576   
-208   -176   
304    -256   
-192   784    
-128   1184   
-48    464    
176    -160   
-208   -128   
-16    -288   
-240   208    
-16    -736   
-352   -864   
80     -576   
-144   -592   
-192   -1568  
176    256    
-48    -80    
160    -304   
-112   -320   
-16    -128   
-288   -272   
192    432    
-192   -1648  
-720   -1344  
176    16     
208    96     
16     240    
-272   -160   
240    1248   
672    784    
-496   896    
96     1008   
240    416    
-32    560    
240    736    
-48    -1120  
-560   -512   
176    176    
208    32     
80     -224   
96     -208   
-240   80     
32     -64    
336    400    
-112   400    
64     -64    
-192   -32    
32     16     
128    -176   
112    80     
-160   176    
-112   -16    
16     -336   
528    80     
-512   -128   
0      -128   
208    160    
64     -208   
368    -208   
-1360  -64    
-128   176    
-64    -16    
-432   32     
-192   176    
288    0      
-864   320    
176    336    
16     48     
0      -192   
32     96     
-928   -16    
-96    272    
208    -80    
-96    0      
-288   -224   
-176   -64    
-16    48     
64     16     
-608   560    
720    -400   
-1056  -48    
-368   -256   
32     288    
160    704    
-288   272    
-208   -272   
-16    352    
-32    -160   
272    -96    
-144   304    
64     256    
-368   208    
-48    -176   
224    -224   
448    176    
-416   848    
-496   336    
544    192    
256    -64    
-416   -160   
-288   -336   
208    224    
-80    -240   
176    192    
16     -80    
-432   -80    
-112   256    
320    416    
-320   2064   
1856   864    
-736   -496   
-64    16     
640    352    
-656   -976   
-400   -368   
560    304    
-64    912    
-176   480    
144    256    
-48    160    
-144   192    
96     416    
48     144    
64     128    
-352   -128   
224    -272   
-352   -480   
48     -96    
-368   -672   
992    -464   
-1440  400    
928    368    
224    832    
0      128    
-112   -208   
-32    -192   
176    176    
32     -192   
-832   144    
352    96     
112    144    
-208   48     
-288   -48    
-288   -16    
256    128    
-880   16     
-160   192    
240    112    
-112   48     
32     80     
-384   -512   
304    192    
112    96     
-80    496    
-672   672    
288    16     
-464   576    
512    256    
-224   -160   
128    -128   
128    -256   
-160   96     
80     224    
512    368    
-224   576    
416    -432   
-304   -48    
208    32     
-240   16     
176    16     
208    0      
96     80     
32     96     
-224   64     
240    32     
-304   -16    
-128   16     
-128   512    
784    976    
-1008  464    
96     608    
1696   -272   
-368   160    
-1104  16     
336    240    
864    0      
-464   -64    
64     -384   
-352   224    
656    32     
-336   -80    
224    -64    
-272   32     
416    -16    
-16    112    
32     16     
-432   -96    
928    64     
-224   64     
-48    224    
176    400    
-608   -64    
-128   64     
768    -16    
16     288    
-448   112    
96     240    
592    16     
-640   64     
-16    288    
160    48     
-32    32     
192    -112   
32     -80    
-160   -64    
-304   -96    
96     16     
-448   224    
192    96     
-96    160    
144    96     
-224   -64    
-32    48     
352    -48    
-192   96     
0      80     
48     208    
208    160    
-144   128    
-224   144    
0      -240   
-976   144    
496    -1184  
-528   -528   
160    -144   
-416   -288   
96     64     
352    320    
208    224    
-144   160    
112    144    
-176   16     
112    208    
64     128    
-16    0      
96     704    
-224   240    
-96    -176   
208    16     
96     80     
-96    240    
160    368    
176    368    
-128   336    
-176   -320   
400    -48    
80     480    
-128   -272   
-16    -48    
-496   -1248  
1616   0      
-848   560    
80     -48    
64     272    
-576   -384   
368    -144   
160    368    
224    304    
-224   160    
-32    -48    
448    -112   
-96    352    
-48    96     
64     432    
224    -80    
-208   -80    
-64    -144   
48     -384   
112    48     
112    240    
624    16     
-1312  976    
912    -384   
-464   32     
480    -160   
16     336    
-352   64     
-160   -576   
272    32     
160    192    
-448   240    
32     320    
192    -144   
-32    96     
-176   -464   
32     -96    
32     176    
128    128    
48     256    
224    160    
-144   48     
96     208    
-240   0      
-128   144    
576    -112   
-416   80     
96     176    
-16    -256   
-48    112    
-48    208    
-512   1152   
1888   -32    
-1120  -96    
544    -32    
-288   -160   
-144   48     
16     -224   
-32    -272   
112    64     
-96    32     
272    144    
0      160    
-144   -192   
336    368    
-80    -64    
-128   352    
48     160    
32     176    
-48    64     
112    160    
-80    -96    
-640   -304   
1792   -640   
-48    832    
-240   64     
-304   32     
592    32     
-160   32     
176    224    
96     -32    
80     160    
208    -528   
-112   64     
0      -64    
304    192    
16     16     
-112   112    
32     48     
128    96     
-48    112    
256    0      
-96    -32    
80     -144   
624    -48    
192    -176   
-128   752    
368    144    
-112   0      
-688   -560   
240    -224   
528    -656   
-352   80     
416    -208   
-64    96     
192    -80    
-384   432    
848    -336   
-656   -368   
32     208    
48     -352   
192    128    
32     -144   
-160   48     
-32    32     
112    272    
720    496    
-960   784    
32     32     
-224   -144   
288    -288   
-544   -608   
752    192    
464    -192   
-768   -688   
224    560    
752    320    
384    -976   
-384   -32    
-320   224    
0      448    
112    -496   
128    -16    
-64    -288   
0      480    
208    -400   
272    96     
-16    1088   
-176   -224   
176    192    
160    -560   
-48    336    
-80    -336   
112    -32    
-32    -688   
16     -528   
48     16     
48     -1632  
96     -32    
-560   16     
32     -672   
-112   -80    
112    -112   
-240   96     
64     144    
304    16     
-288   -32    
0      288    
16     -864   
16     320    
272    768    
-112   400    
96     -752   
0      -64    
-64    256    
-272   -464   
128    -32    
560    -48    
-176   192    
0      -688   
16     -464   
256    -96    
-176   272    
224    784    
784    1136   
-272   544    
-80    1008   
80     -400   
112    -560   
-144   -352   
208    -1264  
-224   352    
16     384    
0      -128   
272    -336   
128    -448   
-432   -848   
128    16     
144    -64    
256    -64    
-80    -64    
0      304    
160    -16    
64     32     
96     -176   
192    -32    
-640   -128   
-32    -480   
-576   -688   
-48    -272   
224    -304   
352    -1088  
-304   64     
-576   784    
1248   -240   
-576   416    
160    224    
-256   -272   
-128   -448   
-480   -128   
240    -240   
-176   -192   
-304   -144   
160    144    
272    -96    
-48    -112   
0      -608   
-240   144    
48     -1504  
352    -176   
48     -112   
-256   -48    
-480   -672   
752    -1136  
96     64     
64     0      
-304   96     
32     -256   
-32    -144   
400    -816   
-288   -368   
-128   144    
32     416    
224    -768   
176    -688   
128    -80    
208    368    
-144   -272   
176    480    
272    -400   
-464   64     
48     -32    
384    48     
48     -16    
-208   112    
96     -128   
-144   -448   
384    32     
-64    -416   
-16    112    
-80    -48    
-112   -512   
1584   912    
-1408  1824   
-240   0      
704    -624   
-1632  -672   
624    368    
224    -64    
-784   -112   
256    -352   
-128   -320   
160    0      
-192   -288   
224    48     
144    352    
-320   112    
-80    288    
160    -240   
-224   -80    
-128   -96    
64     160    
128    16     
400    1184   
-880   -928   
-608   112    
784    -112   
-400   -128   
-304   -64    
160    -112   
128    48     
0      0      
48     -128   
-64    48     
-272   64     
192    64     
160    176    
-144   -128   
-704   -32    
304    112    
-304   224    
368    -416   
-208   -144   
-128   0      
-560   -208   
784    -144   
-1456  336    
304    -32    
128    -512   
-240   -80    
384    592    
-592   288    
240    -304   
-384   -16    
-576   32     
32     272    
80     -16    
352    0      
80     96     
-304   80     
192    -128   
384    -144   
48     192    
-688   16     
80     -32    
-880   -64    
0      -224   
-144   -112   
448    -208   
-496   432    
704    -16    
-112   -112   
-1008  -1552  
1184   464    
-48    -848   
-656   -480   
1040   656    
-976   -416   
32     176    
480    -144   
-208   128    
-288   -480   
112    80     
368    0      
-192   0      
336    -16    
-384   -192   
336    48     
128    128    
64     64     
208    112    
160    800    
-1024  608    
736    608    
112    -192   
-240   32     
656    400    
-1312  -112   
-64    272    
800    -224   
-656   -80    
128    -176   
-304   112    
464    16     
-224   0      
272    -64    
-336   -240   
176    192    
208    -32    
-176   128    
-80    -112   
-48    -80    
-192   -96    
-352   128    
256    -80    
160    -48    
32     -176   
-320   16     
144    112    
-128   480    
640    352    
-320   80     
-240   -16    
288    48     
80     320    
192    -288   
-848   256    
640    -16    
-256   384    
-96    80     
96     -96    
-464   -16    
224    -160   
224    32     
96     16     
-192   48     
-16    144    
-32    -16    
0      -288   
64     -80    
-224   0      
-48    112    
-384   -224   
240    -48    
-400   48     
-80    -48    
176    32     
-112   208    
-16    176    
-32    -48    
-16    32     
32     416    
-256   48     
-192   144    
1136   2912   
672    -16    
-1568  448    
368    -128   
-48    -16    
-288   64     
144    -96    
-32    464    
-160   -384   
80     -112   
400    144    
-224   32     
-16    16     
-16    -224   
336    -16    
-176   320    
144    -256   
-256   64     
0      -112   
256    80     
752    1296   
-1648  304    
656    32     
576    752    
-176   -208   
0      112    
-368   80     
16     -336   
144    -144   
304    -80    
-176   80     
-480   144    
320    176    
32     64     
-256   -144   
208    -208   
-304   160    
80     -128   
32     80     
224    128    
-192   32     
-656   112    
592    48     
-32    48     
16     -192   
-160   16     
-96    -80    
48     192    
-128   -384   
560    176    
-1760  -512   
1520   848    
-352   256    
-80    -224   
448    80     
-32    32     
-112   928    
528    464    
-384   256    
208    368    
288    240    
-80    128    
-48    160    
80     -144   
-432   -192   
256    -32    
-80    176    
112    448    
192    304    
-112   160    
-32    176    
432    1312   
1600   -160   
-1568  -688   
976    -688   
16     112    
-432   1072   
1056   480    
-368   -144   
-64    -64    
-368   80     
384    96     
272    32     
16     32     
-128   368    
-208   368    
32     16     
80     -320   
160    -320   
-48    -80    
96     64     
32     -16    
-96    -160   
-592   -592   
656    128    
208    352    
-656   -224   
688    -96    
-432   128    
-80    432    
-96    64     
320    464    
-16    384    
-16    240    
528    608    
-848   1136   
-752   320    
336    112    
-320   176    
144    128    
-272   -144   
208    -48    
16     -48    
160    -304   
-192   128    
192    448    
-256   304    
-384   -352   
32     -240   
-64    -256   
-112   272    
336    2400   
608    -1168  
-768   80     
-208   -1344  
-80    496    
864    1136   
80     496    
-304   -736   
208    1088   
-240   496    
560    -400   
-272   288    
-336   80     
-64    -16    
576    -352   
96     1008   
-304   -608   
-384   832    
432    -1200  
288    1104   
80     -336   
-208   -192   
64     -160   
-96    528    
512    -48    
-256   -128   
0      352    
432    1840   
-48    -288   
32     -128   
-96    -96    
-80    240    
496    432    
-32    416    
-288   -240   
16     -592   
240    672    
-304   -336   
384    -192   
-304   -544   
32     0      
160    128    
48     480    
128    -336   
-400   -896   
560    128    
-176   16     
-112   -272   
-320   -704   
-144   144    
400    -736   
224    1088   
336    128    
-272   80     
-64    -176   
304    -32    
-80    32     
288    816    
-304   -1632  
-112   -560   
32     496    
64     32     
-16    32     
-96    -64    
160    -224   
272    -656   
80     -64    
128    -800   
80     320    
-80    -96    
128    -112   
336    576    
48     160    
32     112    
-208   -400   
-176   -704   
752    -288   
288    1392   
-176   -640   
-320   -240   
-160   -528   
672    -64    
880    752    
-400   -128   
-256   400    
1104   912    
-368   -400   
272    80     
-80    416    
-208   -416   
352    128    
0      -160   
-64    0      
-16    -96    
320    -96    
304    -32    
-320   -144   
64     -912   
128    336    
112    -272   
144    48     
-320   1360   
144    304    
-96    -432   
432    64     
-96    -192   
224    112    
-176   672    
64     -128   
32     -144   
-48    -240   
144    64     
-80    96     
-64    -1136  
112    64     
64     -304   
-464   192    
464    304    
48     -432   
272    128    
-80    -1120  
48     48     
224    -112   
-128   -48    
208    -96    
-176   80     
336    -1248  
-64    304    
96     -272   
-48    48     
-240   -656   
1296   -1168  
-1424  -80    
-48    -944   
528    -48    
-400   -176   
32     -160   
624    -1344  
-304   -96    
-288   64     
112    -16    
160    -144   
-16    16     
16     -224   
-240   208    
480    80     
-16    128    
16     -64    
-448   -80    
176    -112   
-112   0      
112    80     
-624   -224   
1248   -672   
-592   -480   
112    -32    
-304   -112   
352    96     
32     -512   
-32    -96    
80     -32    
-208   16     
96     32     
240    -48    
-80    -48    
-288   -112   
352    0      
-64    -224   
416    176    
-176   -352   
224    -16    
-48    -96    
-448   -320   
1424   224    
-64    640    
-1680  -224   
128    -480   
96     -304   
176    -304   
-448   128    
-96    192    
-704   240    
272    -48    
384    -64    
-400   -1136  
-96    256    
256    -320   
256    576    
-64    80     
-368   240    
-368   0      
240    -320   
576    224    
-80    -128   
-592   32     
544    128    
96     -1120  
-304   128    
-336   144    
544    -16    
-240   -592   
2496   -1712  
-3312  -640   
896    -1376  
576    -160   
-784   80     
-304   -272   
384    192    
624    -256   
-288   -384   
-496   -256   
224    48     
-80    -176   
-176   112    
304    -176   
-128   112    
-32    -864   
-208   176    
208    -128   
-512   -128   
224    432    
784    272    
-1248  192    
560    -32    
-720   -224   
144    128    
416    0      
-592   32     
224    -16    
80     -192   
368    -16    
-272   -416   
288    160    
-464   80     
416    -192   
-112   32     
-32    32     
-256   208    
544    112    
-560   32     
-16    176    
48     112    
-64    -224   
288    96     
-288   -432   
208    -128   
128    -208   
48     112    
-32    160    
208    400    
-272   464    
80     432    
-16    128    
-272   -144   
400    -144   
-464   -64    
16     -112   
-112   0      
48     32     
128    -288   
64     224    
-736   288    
160    96     
64     -96    
-384   -368   
-64    -240   
-240   -48    
-288   128    
416    176    
-224   272    
208    288    
288    112    
-720   -48    
-16    -80    
-32    -528   
64     48     
48     -176   
-192   160    
48     96     
-16    304    
256    112    
-208   0      
-528   -1120  
816    -1472  
-1152  432    
880    -368   
-192   -208   
-832   -640   
432    -112   
752    208    
-304   48     
-416   64     
-64    32     
480    272    
-80    752    
-144   16     
-400   384    
64     -96    
-1024  -960   
-80    -336   
32     -672   
0      -192   
96     -32    
-64    -928   
368    -480   
-704   -64    
-160   128    
208    464    
-272   64     
-16    544    
-112   -672   
352    -64    
-368   96     
160    80     
-112   320    
-256   48     
-16    -176   
48     -112   
64     208    
-208   -160   
336    96     
-208   -96    
32     0      
-192   288    
208    -96    
-240   -144   
-112   112    
192    272    
-368   192    
16     16     
-208   -96    
192    176    
80     -16    
-1392  1232   
3104   -816   
-1184  -320   
-960   -1104  
1392   272    
-96    16     
-896   672    
720    1072   
-304   -928   
-176   -672   
304    496    
0      112    
-624   0      
192    -32    
400    48     
-144   224    
-16    48     
-96    96     
-112   64     
-48    -80    
320    1184   
176    -768   
-2608  352    
2224   -1024  
-192   -832   
-1344  -272   
720    560    
368    336    
-144   112    
-672   96     
-80    -176   
-336   -64    
96     -336   
-176   -64    
-64    48     
-224   256    
128    64     
128    -496   
-448   192    
528    1168   
16     784    
-80    736    
-96    -208   
544    256    
-1296  272    
592    -1296  
416    160    
-928   736    
192    -208   
96     -192   
64     720    
-240   -160   
-128   240    
240    -128   
-192   16     
592    48     
-496   -496   
-448   -112   
400    544    
-368   768    
688    320    
-128   176    
-96    384    
16     272    
-64    128    
368    64     
-432   -32    
192    944    
80     496    
-128   96     
-416   -560   
1088   -1392  
-736   -896   
944    160    
-144   576    
-752   160    
608    96     
592    -256   
32     -256   
-368   -624   
-16    592    
336    -384   
336    208    
-464   48     
176    560    
-144   704    
16     112    
-16    -64    
-112   -512   
48     256    
160    720    
112    176    
-64    -208   
-352   656    
848    112    
-736   -176   
32     -144   
-112   -976   
-272   832    
352    1248   
-464   448    
368    -176   
80     48     
-80    -144   
-96    -80    
-48    48     
64     256    
160    320    
160    -592   
-432   -384   
224    -608   
128    -864   
-144   -496   
160    480    
-16    560    
64     -768   
112    -224   
32     336    
-96    -384   
-176   192    
464    624    
496    1440   
-768   960    
160    320    
656    1632   
544    272    
-480   -240   
288    -560   
-112   1040   
448    1136   
240    1024   
240    336    
-144   448    
80     800    
320    64     
64     -400   
-32    -288   
-32    48     
112    48     
-144   -128   
352    -480   
112    -336   
-128   128    
-256   -96    
160    128    
144    -304   
-400   -1280  
176    -752   
-48    -208   
64     208    
16     -32    
832    2080   
-2032  1264   
768    -384   
272    -32    
-160   208    
-256   -464   
16     -400   
-80    -1392  
352    -560   
32     144    
160    192    
-96    368    
48     -176   
-96    -96    
64     -464   
0      608    
304    64     
-304   128    
160    -16    
0      80     
336    736    
-912   128    
544    -32    
448    144    
-656   16     
368    96     
-192   192    
80     -656   
-96    -192   
288    80     
16     256    
-448   272    
256    -32    
192    -48    
32     80     
-240   64     
48     208    
80     -80    
432    32     
-368   80     
80     80     
-160   112    
96     -112   
128    -176   
16     -1264  
-48    -144   
-112   304    
48     80     
48     96     
400    -176   
-1856  -1424  
1168   96     
1488   -32    
-1200  -48    
32     272    
80     -192   
592    -224   
-464   80     
64     192    
128    -1264  
128    64     
96     112    
-256   48     
128    16     
224    144    
0      0      
-80    64     
176    -16    
-48    -80    
80     112    
-16    48     
-288   -592   
-832   912    
1424   -400   
-320   -448   
-480   -144   
432    -400   
384    -208   
-592   80     
-160   160    
272    80     
704    192    
-160   0      
-288   64     
64     176    
-224   -944   
416    96     
-80    -272   
320    -64    
-352   -512   
-272   96     
400    -256   
480    128    
-160   -64    
208    304    
-432   -160   
-640   -336   
656    144    
-16    -848   
400    880    
-240   48     
-128   160    
976    -336   
-416   320    
-80    -208   
-96    -48    
688    -688   
176    16     
-112   256    
-640   0      
240    224    
48     -240   
64     -1408  
240    -240   
-112   112    
-80    -32    
32     96     
-272   64     
320    112    
-176   -864   
1424   -3952  
-2928  -1760  
1776   976    
112    288    
-672   -288   
672    -208   
-16    -64    
-704   16     
608    -176   
-176   -1184  
448    -128   
-144   352    
0      -144   
64     112    
-192   -368   
416    -624   
-80    96     
176    -80    
-112   -224   
640    -96    
-112   -288   
-1520  -48    
32     80     
-512   -96    
-80    -432   
496    16     
80     -880   
-240   -144   
144    96     
224    0      
336    -16    
-272   160    
32     -560   
-16    336    
32     -80    
-352   240    
80     240    
80     -112   
-144   48     
32     0      
64     -128   
256    -224   
-80    -224   
16     -1136  
-224   64     
-128   176    
160    256    
-208   80     
176    256    
176    224    
-384   -48    
-384   -432   
496    -752   
-64    -64    
176    -48    
96     1024   
480    464    
-160   128    
96     -400   
16     48     
-64    -416   
-304   -16    
496    480    
496    496    
-400   704    
160    432    
-224   608    
432    272    
-368   464    
-80    384    
-16    400    
-48    128    
288    96     
160    -464   
32     144    
-32    -32    
32     -16    
80     -688   
192    -560   
-240   64     
48     288    
736    1728   
-1584  880    
624    -528   
624    224    
-656   -384   
240    -304   
-240   192    
176    -128   
-32    208    
256    -1072  
-96    -224   
-32    544    
176    -352   
0      -144   
-16    -320   
48     112    
304    160    
-240   448    
32     -112   
-624   -432   
-240   -576   
816    -464   
-448   128    
112    -288   
80     -848   
-272   64     
128    448    
96     1248   
-48    768    
192    -176   
-512   -48    
176    256    
-528   48     
304    -272   
32     128    
-144   -96    
-80    0      
496    -144   
-96    128    
-32    -288   
-256   -80    
160    192    
16     128    
-256   96     
64     -432   
176    -96    
-48    192    
-128   304    
-32    48     
-240   -144   
352    1056   
224    368    
-1744  -672   
2208   304    
-528   320    
-352   -48    
512    176    
-16    -768   
-336   992    
224    816    
-144   -624   
48     -464   
160    192    
64     288    
-512   -112   
-1168  -336   
208    -80    
-368   -400   
-336   -304   
176    272    
224    -144   
-928   192    
1488   -672   
-896   768    
496    896    
-384   576    
304    464    
-368   -496   
-464   -2064  
304    -1456  
-400   128    
304    208    
-160   240    
-192   416    
448    864    
-256   -272   
-448   0      
224    -192   
80     1008   
144    1440   
64     480    
-832   -64    
-240   -464   
-32    -544   
192    1568   
864    368    
-656   -784   
-528   -1280  
192    -560   
-352   -656   
-304   -768   
320    160    
-144   32     
-352   320    
-224   -496   
208    416    
-224   208    
-112   256    
112    -928   
-176   -240   
-48    -352   
-336   144    
64     -400   
-272   -560   
112    -192   
224    400    
-688   112    
144    208    
-64    592    
256    288    
-176   112    
-240   2896   
512    128    
-1552  -48    
128    -96    
1280   1376   
208    608    
-368   752    
32     320    
16     128    
320    -784   
-160   608    
0      320    
-208   32     
96     -176   
160    -352   
-272   64     
-48    16     
-592   -48    
368    192    
-96    336    
-112   208    
48     240    
352    -336   
-208   -672   
-1120  -320   
560    -608   
-400   144    
400    -96    
-528   -304   
176    -112   
-448   -256   
112    192    
-128   -352   
96     0      
240    0      
-192   80     
-208   48     
48     112    
-80    144    
-32    -320   
-704   -352   
288    -160   
96     352    
64     304    
272    128    
-288   -80    
64     -432   
-672   -400   
432    -176   
-272   144    
-80    128    
-208   -352   
336    -864   
-192   -224   
-96    32     
320    992    
-416   880    
240    128    
-464   -112   
208    -32    
-128   -320   
-400   -176   
224    -64    
336    -32    
-192   80     
-176   -16    
96     0      
-144   384    
64     176    
160    -176   
-80    -16    
-464   16     
400    -256   
-128   -160   
-48    288    
0      48     
-272   176    
128    -112   
144    -16    
-192   64     
-208   176    
992    2576   
1760   -208   
-1808  560    
592    -128   
-352   -96    
320    -256   
-80    160    
-128   -528   
-48    16     
32     96     
272    0      
-192   96     
0      240    
-176   48     
320    -80    
-112   224    
352    -320   
-480   288    
48     -48    
288    64     
240    -816   
-880   800    
592    32     
-688   160    
240    -16    
320    -128   
-656   304    
48     192    
-128   272    
704    -192   
-240   64     
-464   0      
144    192    
0      176    
192    304    
160    64     
-32    112    
-528   -96    
384    144    
-32    16     
80     96     
48     112    
-128   144    
176    160    
144    128    
-416   144    
592    80     
-368   96     
176    144    
-400   -576   
688    -896   
96     1024   
336    288    
-464   -112   
816    144    
-144   -16    
-720   304    
1248   16     
-288   112    
-32    128    
-272   176    
112    128    
128    0      
16     160    
352    64     
-320   144    
192    0      
96     160    
64     -32    
-160   208    
-16    -432   
464    480    
80     -160   
16     0      
848    -144   
-1296  -288   
624    80     
304    48     
-112   -176   
-288   208    
400    0      
128    176    
-192   16     
0      112    
-160   -96    
384    -304   
0      96     
-128   -96    
0      64     
-16    192    
144    48     
-32    -208   
768    -16    
-736   160    
1152   -16    
240    128    
-320   128    
-768   -208   
-480   256    
688    -48    
-176   32     
288    -80    
32     -736   
-192   208    
-128   -208   
400    -80    
144    256    
-192   -128   
496    -176   
-80    128    
384    176    
64     112    
-336   128    
192    128    
208    192    
-112   -592   
48     32     
-224   -688   
0      16     
512    800    
-880   -3776  
-1712  -608   
1696   672    
-48    256    
320    304    
-704   80     
-240   96     
768    -304   
-160   -128   
416    32     
32     -144   
-256   192    
144    -272   
48     96     
16     160    
112    80     
48     128    
144    -16    
-96    96     
464    288    
-112   -1328  
-128   -1040  
128    64     
-416   0      
-448   -112   
896    -480   
16     112    
-64    80     
-160   496    
208    -192   
80     -304   
-352   -592   
256    112    
304    -16    
-320   464    
-32    432    
160    576    
352    0      
-272   -256   
336    112    
-192   -96    
112    112    
336    -448   
-272   48     
352    -496   
192    -80    
-144   -464   
-32    304    
-288   128    
368    240    
368    -240   
-336   -368   
352    -80    
48     352    
160    144    
32     16     
-208   784    
48     768    
256    1008   
208    512    
-192   -944   
-496   -832   
176    -304   
96     176    
128    240    
32     432    
-176   -192   
128    -496   
-160   480    
208    96     
80     96     
-80    -48    
0      80     
80     128    
208    -80    
-304   -176   
0      -240   
256    -96    
-576   -768   
416    -144   
368    -128   
-240   96     
32     -528   
608    -352   
-608   -48    
80     -112   
-48    64     
-32    -160   
224    -16    
272    -640   
48     -1536  
-16    16     
48     -272   
112    96     
-96    0      
32     -160   
208    -176   
144    16     
128    -16    
-48    -624   
-128   32     
-272   -192   
1088   -592   
-64    688    
144    -240   
-832   448    
432    -288   
288    -400   
-96    192    
48     -656   
-288   -512   
-112   -272   
496    80     
144    128    
-272   -32    
64     -192   
64     -48    
16     -144   
64     32     
96     144    
-16    128    
-208   128    
352    -160   
16     -64    
-176   -48    
560    160    
-704   48     
-160   160    
96     -32    
-368   -800   
480    -880   
-368   -2112  
2224   -400   
-2000  688    
976    512    
112    224    
-944   272    
336    -176   
400    -816   
0      -192   
-32    1456   
-400   544    
272    -560   
432    112    
-144   192    
-144   96     
160    -320   
80     -176   
48     16     
-288   -32    
144    80     
96     16     
-768   -512   
1424   -448   
-240   -192   
-592   144    
768    1200   
688    -960   
-944   -1120  
-368   688    
848    384    
-336   -736   
208    -544   
144    -864   
-240   -528   
-416   -368   
432    48     
-256   288    
464    704    
-400   496    
-208   -160   
144    -192   
-32    -80    
112    80     
-192   272    
160    960    
-160   -96    
-720   -240   
464    -1712  
-576   64     
-16    -464   
608    -64    
112    112    
192    -32    
-672   224    
-48    48     
-64    -224   
-480   -1312  
112    -576   
-240   -496   
-1536  160    
528    -336   
-192   48     
-96    -272   
224    192    
176    -64    
160    176    
-416   256    
-176   -64    
-352   64     
992    768    
-672   -1008  
1056   -2288  
-384   336    
112    160    
-912   192    
-208   -640   
768    -368   
-112   48     
-624   -224   
32     -1040  
432    -928   
-288   272    
176    32     
-544   288    
-288   -208   
640    240    
-336   -224   
-256   -80    
-304   -656   
496    -528   
-64    -1520  
-192   -496   
-192   -192   
-144   112    
-224   -560   
592    80     
-288   176    
480    352    
-576   -192   
-144   -480   
80     -304   
-336   0      
240    -224   
-368   -288   
80     -48    
-320   32     
-48    0      
-672   -288   
-128   -160   
96     96     
-96    16     
112    48     
-400   -64    
-240   80     
400    208    
-224   80     
-112   80     
-16    -48    
-192   -272   
208    480    
-400   -16    
-112   224    
336    448    
-544   368    
-256   -272   
80     112    
-176   16     
-64    -16    
16     144    
-112   640    
384    64     
-640   144    
-320   176    
0      -368   
176    -48    
-48    -96    
-256   16     
96     -560   
-16    192    
-32    208    
144    -160   
-320   192    
80     32     
32     144    
32     -16    
-224   -112   
-416   176    
48     96     
32     0      
16     16     
-128   -32    
1008   2880   
-2064  -1072  
-592   -16    
2016   624    
-1952  -176   
400    208    
-112   80     
368    48     
-128   128    
16     -272   
-272   384    
-32    -96    
0      16     
192    352    
-672   -368   
256    64     
352    144    
-320   240    
112    -16    
0      208    
-176   64     
656    1216   
224    -32    
-1168  -592   
672    16     
-160   -48    
-160   128    
-528   -96    
144    288    
-160   -304   
-208   176    
528    -16    
-112   240    
-128   144    
64     96     
-416   112    
16     416    
416    64     
-48    64     
48     -224   
-368   0      
432    176    
-384   128    
432    160    
-416   -256   
160    192    
160    48     
-304   176    
400    64     
-272   144    
-112   608    
-544   112    
-16    640    
-224   -64    
64     224    
112    -96    
48     208    
-592   -160   
384    304    
0      -16    
144    32     
-368   32     
96     64     
112    192    
-352   48     
240    240    
-208   -48    
192    112    
-304   112    
32     272    
-192   -16    
688    1248   
-1008  -592   
-496   128    
512    -112   
-304   -48    
272    192    
-144   128    
-128   400    
1088   -96    
-400   32     
-176   48     
-16    80     
16     112    
96     -32    
128    144    
-288   160    
64     -80    
-96    416    
-464   336    
208    -32    
0      32     
-80    80     
688    272    
-816   80     
-112   48     
192    -208   
640    32     
-544   240    
112    -80    
-64    128    
-304   112    
-112   -80    
336    80     
-80    48     
-448   80     
-80    160    
672    128    
-400   0      
-288   176    
640    16     
-272   64     
0      128    
-144   -32    
96     224    
-16    -176   
112    -96    
240    64     
96     192    
256    496    
-1280  544    
2016   640    
16     -624   
-2000  -256   
544    112    
352    96     
112    64     
-48    -32    
-160   256    
-352   224    
432    96     
272    80     
-240   80     
-176   192    
32     160    
400    128    
-208   128    
-112   224    
176    48     
-480   -944   
-32    -656   
96     144    
-160   384    
288    256    
208    -16    
-128   144    
-352   288    
96     -160   
-48    -528   
-240   -320   
208    624    
-240   560    
32     -544   
-96    -208   
240    432    
-48    80     
-208   288    
688    48     
-1008  -688   
144    -768   
-32    -496   
-32    -1024  
-128   -160   
-96    160    
560    656    
-576   320    
144    -224   
304    -1328  
-720   -672   
496    1344   
-144   80     
320    -240   
-368   640    
848    -432   
-816   -112   
512    96     
352    -48    
-288   224    
272    480    
48     208    
64     176    
48     -224   
-80    176    
32     64     
192    -112   
176    640    
160    544    
-16    736    
416    -208   
16     32     
-176   96     
96     -624   
144    32     
16     16     
144    208    
-160   208    
112    80     
64     64     
80     352    
-16    64     
16     64     
112    -384   
256    -416   
-864   272    
288    -80    
-160   224    
192    -128   
-176   -160   
96     -2736  
-32    304    
-32    176    
80     -64    
272    -16    
-208   192    
-64    288    
-32    80     
176    0      
-352   448    
-192   256    
352    -112   
160    144    
-16    -144   
-752   224    
944    -416   
-912   -64    
336    -784   
160    192    
32     336    
176    -16    
-656   -544   
-128   352    
160    224    
192    -240   
96     -32    
-144   96     
-32    448    
32     -560   
208    32     
-128   -656   
-224   160    
304    -1072  
-64    208    
-96    -48    
-224   -32    
112    272    
-80    80     
272    320    
-320   -80    
-112   -64    
96     -416   
400    -304   
-624   -1008  
1552   -1008  
-80    640    
672    416    
-192   352    
-512   272    
192    -448   
304    -976   
-1232  -1856  
176    544    
144    1280   
0      -16    
320    -224   
-80    -48    
-352   288    
416    32     
96     16     
-64    -288   
-48    320    
272    640    
96     368    
80     -816   
-1168  848    
1392   -544   
-1280  -496   
144    -288   
0      -112   
640    1328   
-208   128    
-208   16     
480    -336   
-64    208    
-192   -304   
-64    320    
480    32     
-272   96     
-48    160    
112    -96    
256    176    
272    -768   
0      -624   
-128   -48    
-96    -16    
-336   -368   
-144   -416   
464    384    
480    -64    
80     -96    
-112   368    
48     -176   
416    208    
544    -80    
-304   -1696  
80     48     
16     -80    
592    -240   
-384   16     
-640   -352   
1104   -512   
96     -896   
0      112    
64     176    
112    -16    
96     128    
640    -400   
-464   208    
416    48     
-112   -112   
480    16     
32     704    
-704   -912   
208    1440   
1392   128    
-1664  -176   
224    -208   
368    -160   
656    -1488  
-672   -336   
-256   -576   
-16    32     
144    128    
128    -176   
-80    64     
-112   -64    
-448   176    
336    -176   
-496   240    
0      -176   
-160   96     
432    -304   
-752   -112   
944    -432   
-352   240    
368    -320   
-656   240    
272    304    
0      448    
256    -32    
-144   -160   
-176   -64    
176    -32    
-416   -32    
336    -144   
32     -112   
224    -432   
-32    160    
-240   -384   
336    -112   
384    -864   
96     -144   
80     80     
-16    160    
-304   -208   
464    -32    
-208   -144   
-288   144    
80     -80    
96     -288   
-80    -304   
-416   -320   
288    96     
368    -16    
32     880    
-432   -544   
-272   -240   
880    -1008  
-928   16     
496    -48    
-128   48     
-336   384    
176    -32    
-112   -64    
80     -48    
-512   80     
192    384    
32     96     
16     -224   
80     -464   
-160   -320   
-64    224    
16     -240   
176    -80    
-32    -32    
48     -144   
-224   16     
272    -80    
-288   64     
224    48     
-224   32     
0      112    
112    -80    
-160   -320   
1056   2608   
1232   -16    
-1536  400    
752    -352   
-480   -352   
608    144    
32     -224   
32     -416   
-112   320    
-224   160    
320    -192   
-432   -64    
64     -128   
48     -288   
304    -192   
-160   128    
80     -352   
-32    128    
80     -576   
64     80     
576    96     
-1392  944    
784    -96    
-272   -144   
48     -32    
-32    -64    
-400   96     
240    368    
0      -80    
16     -288   
-144   96     
-1472  -32    
-176   176    
192    -128   
-624   -128   
-256   64     
-96    64     
400    -80    
-432   48     
416    128    
-256   144    
64     16     
0      96     
64     16     
-912   48     
576    128    
-656   -224   
-64    -32    
16     96     
176    -64    
-704   1616   
2496   336    
-1040  160    
-1968  -480   
640    128    
-288   128    
48     304    
368    48     
-416   32     
-272   -48    
224    0      
112    -80    
0      16     
-416   -96    
464    48     
-176   -48    
-128   32     
64     160    
-112   -16    
176    32     
-416   -16    
-624   -832   
624    -480   
32     160    
-944   -528   
176    224    
0      192    
-64    -448   
-224   -32    
-368   416    
224    -128   
144    112    
80     16     
-288   128    
-16    320    
-688   -112   
192    64     
176    160    
448    -64    
-272   -64    
32     400    
368    224    
0      -800   
-848   368    
544    192    
-80    -272   
-640   336    
96     -96    
256    -16    
96     -16    
-368   -80    
-96    144    
96     -96    
80     80     
-48    32     
416    320    
416    240    
-880   144    
352    272    
-576   -256   
64     64     
96     192    
-256   0      
192    176    
0      -32    
256    464    
-784   288    
-384   -48    
544    304    
32     -432   
-32    960    
-176   64     
704    -144   
1744   128    
-560   -80    
-880   32     
1216   1104   
-640   640    
-304   -480   
-16    -432   
48     96     
-32    144    
-352   -96    
352    48     
-48    -272   
16     -144   
-304   -480   
16     304    
-304   -96    
368    -896   
-208   -592   
-400   -48    
304    368    
-208   176    
-64    736    
-64    544    
64     512    
0      -112   
112    304    
-240   -320   
128    -320   
-48    -64    
32     816    
160    272    
-320   96     
96     128    
112    752    
320    608    
-400   160    
80     -192   
112    -176   
0      64     
96     192    
48     768    
-32    976    
448    -496   
-144   -864   
80     176    
-464   -592   
192    416    
-192   -192   
-128   -480   
544    496    
-496   192    
144    944    
-112   656    
256    336    
32     -160   
-576   -1312  
240    -592   
96     656    
160    320    
-48    -192   
-112   192    
-144   128    
144    80     
-336   64     
-32    -80    
80     112    
96     192    
288    -16    
-160   112    
-144   -128   
112    32     
16     16     
64     16     
-64    96     
-208   -64    
304    -272   
416    240    
-176   96     
48     32     
-576   704    
784    -416   
-640   144    
64     -32    
176    -16    
-240   288    
352    256    
-80    144    
-96    -64    
176    16     
80     32     
128    -64    
-80    -16    
192    0      
-112   -112   
288    -336   
80     -240   
160    32     
-48    320    
-368   -176   
832    -768   
-128   672    
144    208    
-352   -160   
-48    -224   
80     -400   
48     608    
384    448    
-352   32     
-352   -128   
464    48     
256    -96    
-128   -64    
368    80     
-464   -288   
16     192    
80     752    
432    256    
-416   -880   
192    -416   
160    1168   
400    80     
96     -944   
-272   384    
-96    32     
128    176    
224    320    
-144   32     
288    -48    
448    896    
416    -64    
-1872  -240   
1120   -640   
1104   -1312  
-624   -352   
112    -112   
-176   -736   
-96    -1168  
288    -160   
224    0      
-128   160    
48     -224   
176    48     
-480   -176   
208    -1648  
192    112    
96     -48    
-224   -32    
16     48     
16     48     
-448   -1104  
288    -240   
608    -32    
-1056  -16    
832    48     
96     176    
-944   400    
416    -80    
-320   64     
112    -624   
208    96     
64     112    
112    384    
-336   96     
-272   80     
512    80     
80     368    
-560   64     
-32    48     
224    -160   
80     -128   
240    544    
384    -192   
16     -64    
256    656    
-64    672    
-48    -960   
144    240    
816    48     
-576   48     
-208   -48    
240    288    
-80    64     
-32    16     
112    128    
112    96     
160    416    
-320   0      
448    -448   
-112   -272   
-160   192    
-176   -464   
128    48     
64     -1072  
544    976    
-960   -464   
-384   288    
1088   -48    
-720   -176   
224    -2976  
1264   -2832  
560    1392   
176    432    
-624   304    
176    -512   
432    160    
432    -288   
-320   32     
-128   -560   
336    0      
224    -16    
320    112    
16     176    
112    0      
176    288    
224    32     
-64    192    
-80    -96    
-320   -304   
-112   -192   
400    -80    
-384   -96    
864    32     
-80    -736   
-320   32     
-416   368    
1024   176    
-1072  -160   
624    352    
-400   0      
32     192    
-16    32     
96     -160   
-32    -320   
-448   -384   
416    16     
192    -96    
-80    80     
-384   -288   
128    240    
-80    112    
368    304    
-176   176    
128    224    
-64    192    
-32    -640   
192    -96    
-16    -176   
-160   176    
480    48     
-160   112    
-256   -1072  
-160   0      
272    -64    
-144   272    
448    288    
-96    -400   
-16    -368   
-48    -2480  
256    -1216  
-48    128    
-80    -208   
176    -32    
160    -1376  
32     -176   
-368   80     
112    -672   
48     320    
240    944    
464    -1680  
-624   32     
64     -64    
224    80     
144    -192   
-208   -112   
96     96     
-416   -448   
400    -640   
-64    -1680  
0      176    
608    1920   
-1120  -1824  
-736   400    
1744   -1024  
-976   -432   
64     192    
-32    32     
608    640    
192    -176   
-384   -208   
224    16     
-80    -80    
320    -48    
-64    -416   
208    -16    
-144   496    
128    -464   
0      -176   
-16    544    
96     160    
64     160    
16     1248   
944    -528   
-1120  -192   
240    -368   
-496   -112   
448    -112   
16     208    
-144   160    
-240   -256   
128    -656   
304    -304   
256    336    
-336   256    
-96    224    
128    80     
288    -48    
-480   -256   
32     -16    
-32    -32    
144    -64    
128    -80    
0      -176   
-16    -160   
224    -176   
-160   -640   
-160   96     
304    -1168  
48     64     
-144   -400   
1872   1984   
-1952  1312   
80     352    
960    -224   
-1168  -160   
96     720    
976    496    
-640   608    
-48    288    
-16    16     
256    -304   
0      -112   
352    -336   
-416   64     
-48    -288   
288    352    
-128   48     
-304   -80    
-32    112    
448    -144   
-368   -32    
512    1072   
-1792  -432   
-96    208    
1200   48     
-976   -192   
256    736    
-384   -320   
-304   144    
448    -336   
-544   208    
272    -64    
-112   -16    
-208   -288   
160    -208   
32     48     
-96    -32    
-224   400    
64     208    
-1152  -144   
-112   -512   
160    -48    
-208   -512   
192    800    
-480   -1136  
464    -48    
512    1488   
-1424  80     
-144   -320   
640    -32    
-384   112    
96     -32    
-304   -112   
64     -336   
-240   -80    
272    -368   
224    -32    
-528   752    
608    -320   
-272   -304   
-464   96     
-352   144    
192    -144   
320    320    
-368   80     
-192   -480   
-240   -544   
400    -128   
-192   -224   
-416   128    
352    -96    
-496   -2272  
-1808  -528   
768    400    
-672   96     
544    656    
-528   1696   
-640   1248   
-112   -224   
592    -224   
-272   -336   
-256   736    
-208   -480   
128    80     
384    -16    
-176   -416   
-384   -352   
-192   -96    
0      176    
144    80     
-208   304    
48     416    
-112   -96    
-80    224    
-656   -32    
208    448    
208    992    
-32    336    
-480   -1424  
384    256    
-112   576    
-368   -176   
-240   -272   
208    -16    
-16    96     
-480   -672   
48     -768   
-32    160    
-336   128    
-832   -1440  
320    -64    
48     416    
-128   464    
-16    -208   
-48    432    
208    -128   
-224   -256   
16     48     
112    832    
-144   384    
320    -32    
-176   96     
-512   976    
1040   -80    
-384   784    
368    1472   
-192   576    
208    480    
-368   256    
-192   -224   
208    -256   
112    -96    
-64    16     
-32    16     
0      224    
-48    96     
96     448    
208    448    
-48    -800   
448    -592   
144    848    
-320   -224   
-16    64     
240    -144   
-144   128    
80     -240   
-400   -272   
176    -112   
224    160    
560    160    
-832   352    
208    48     
-416   176    
592    -528   
-416   -144   
368    144    
-1024  160    
144    512    
-240   560    
128    464    
208    96     
-400   448    
112    352    
224    592    
-64    544    
-80    432    
-144   80     
144    208    
240    528    
-112   80     
-224   128    
-96    144    
-208   896    
272    32     
-864   16     
112    -1200  
416    -224   
-96    -96    
32     336    
-64    -112   
-160   80     
336    48     
272    16     
-384   -96    
-160   112    
416    64     
64     64     
-288   64     
-208   -192   
-240   288    
176    -48    
224    -192   
32     -176   
-112   -304   
-80    112    
-144   -432   
48     272    
160    -16    
-160   240    
160    -64    
160    400    
-944   1504   
-160   -416   
3344   752    
192    496    
-1008  480    
-208   448    
800    288    
16     928    
-128   1120   
-80    320    
80     160    
-464   -192   
352    144    
-144   0      
48     144    
-400   32     
368    48     
-224   96     
-80    112    
-80    208    
144    -32    
-64    96     
624    -480   
-1312  464    
1008   -48    
-448   80     
-256   224    
256    48     
64     -144   
448    384    
-112   112    
-256   64     
0      144    
80     -48    
32     160    
-32    -272   
-480   272    
544    -144   
-512   -672   
64     -528   
80     -32    
-272   160    
272    272    
-512   272    
-112   48     
-400   192    
80     64     
160    80     
352    64     
640    288    
-688   368    
-480   80     
576    128    
208    -16    
-288   112    
-176   -32    
-336   -304   
336    -80    
272    -272   
-368   0      
-576   112    
-224   176    
304    48     
400    -48    
-160   80     
-560   0      
768    288    
240    32     
-96    48     
32     192    
-1152  -736   
848    2160   
880    -336   
-1440  -1296  
608    208    
272    -288   
-176   48     
-16    128    
112    416    
0      96     
-304   256    
80     -208   
224    368    
384    -64    
48     176    
160    144    
-256   192    
256    -16    
256    48     
416    480    
-1232  336    
736    -720   
336    -128   
-576   -96    
320    224    
112    224    
-688   -96    
384    304    
16     -208   
-224   288    
-80    -240   
-336   32     
592    -96    
-416   96     
496    192    
-144   192    
-224   -832   
-80    -16    
96     48     
320    -48    
192    64     
-160   0      
-128   0      
240    48     
-32    48     
144    176    
112    -144   
-368   32     
288    208    
0      -32    
0      272    
128    -160   
-320   -16    
480    -112   
-272   560    
448    -336   
-832   -32    
64     -96    
112    240    
592    48     
-176   -48    
-96    -64    
16     112    
32     -48    
208    -176   
-320   176    
160    -672   
16     -80    
-144   -2544  
64     -592   
-224   -208   
96     384    
-16    96     
320    -160   
0      -288   
-48    304    
-272   -192   
144    -224   
160    432    
-64    368    
-32    64     
-48    32     
912    2640   
480    -496   
-1344  528    
64     -1504  
-96    32     
688    352    
-352   320    
240    -528   
-416   -272   
416    144    
144    336    
16     -112   
-96    144    
64     -480   
272    -176   
-16    320    
16     128    
-160   352    
48     -592   
112    0      
720    912    
-1312  768    
832    64     
-192   16     
32     880    
448    496    
-464   0      
0      192    
160    80     
320    96     
-320   288    
144    704    
32     176    
160    -496   
-16    0      
-528   -256   
304    80     
384    256    
-192   96     
-32    112    
-144   -208   
48     144    
112    -176   
32     32     
-32    -224   
96     -112   
320    -144   
-192   176    
-96    -1280  
432    208    
-800   1424   
1248   464    
-432   -336   
112    -176   
400    144    
-416   112    
-80    -32    
160    192    
176    -208   
-96    -16    
-128   -160   
240    -32    
64     288    
-160   512    
576    384    
-192   80     
-144   -1504  
368    -544   
80     -576   
48     -704   
-176   -112   
640    864    
1328   -272   
-1440  -1120  
1424   112    
-144   -160   
-144   144    
-304   1152   
512    496    
-208   -400   
-288   208    
304    -96    
-16    224    
0      192    
112    128    
16     176    
192    32     
32     1072   
784    176    
-288   672    
176    624    
240    96     
288    160    
-16    880    
96     688    
800    1056   
-944   656    
0      -448   
-32    -112   
0      80     
176    208    
432    32     
-144   832    
688    816    
-1168  624    
-240   -384   
560    -48    
-176   -368   
640    640    
80     304    
-240   -96    
560    -160   
16     -48    
-176   64     
-304   -32    
320    -240   
-112   -416   
128    -64    
480    -48    
-80    -48    
-816   -2960  
1696   -2544  
624    64     
-640   544    
-64    512    
-528   1072   
704    640    
320    1584   
-864   -1632  
144    464    
256    -336   
240    480    
272    -288   
-112   0      
-128   -144   
464    -192   
48     176    
320    -224   
-80    -144   
-208   -448   
144    -432   
80     272    
32     -320   
-464   128    
528    -592   
-208   -144   
208    -656   
-528   144    
-480   -1216  
-80    224    
640    352    
-144   -32    
0      304    
-16    -64    
144    -368   
-64    320    
256    944    
80     736    
-16    944    
352    1232   
-256   -368   
80     -624   
-288   -16    
48     96     
-640   80     
-160   -352   
368    -240   
416    384    
-512   96     
-224   -2496  
688    400    
144    368    
-48    -432   
-1152  -880   
432    -1024  
-32    -1296  
-288   -208   
-144   -720   
-432   -656   
160    176    
32     16     
-80    -928   
-240   -880   
16     272    
368    224    
-32    -48    
-192   -192   
96     160    
-96    288    
224    480    
-208   224    
160    -112   
-208   -32    
192    -368   
32     -16    
32     800    
48     752    
48     -80    
144    96     
304    -208   
-128   -176   
368    1312   
-1632  224    
816    -800   
192    464    
16     -592   
-400   176    
176    144    
304    -464   
32     144    
144    624    
-112   608    
-528   -192   
112    -288   
-112   -272   
-224   -80    
64     -32    
-400   -80    
0      32     
-112   -96    
64     -160   
16     -96    
-608   80     
-400   -784   
-288   16     
-128   -272   
384    -368   
-240   -432   
-624   -608   
16     -224   
96     0      
-32    592    
-304   128    
96     64     
-992   -128   
160    32     
288    176    
-384   192    
-160   -224   
96     112    
160    -224   
-192   48     
32     -128   
-160   -64    
-160   64     
544    0      
-624   16     
128    64     
-192   64     
112    48     
48     -224   
256    -784   
-1648  -96    
832    -256   
384    -48    
-608   -336   
-176   688    
416    176    
-96    624    
-304   -128   
224    320    
80     -112   
-320   112    
192    -64    
-384   256    
560    80     
-560   80     
-16    -112   
224    96     
16     0      
-80    -32    
144    80     
240    752    
-1520  224    
720    64     
-528   128    
176    -48    
-176   304    
416    160    
-128   320    
-272   128    
0      -224   
272    -16    
64     64     
-48    48     
-128   144    
0      -16    
-16    64     
-176   -96    
-144   -368   
240    -400   
32     288    
48     0      
32     128    
144    -144   
-912   -256   
-32    -320   
640    208    
-1184  176    
336    224    
-96    -32    
-112   -128   
448    -64    
-576   -80    
-112   304    
-112   112    
-128   -16    
-80    -80    
128    -48    
-320   -96    
-208   16     
-144   -32    
208    128    
-528   -224   
0      0      
224    112    
224    144    
-672   272    
-144   -112   
-112   144    
128    -64    
1488   6240   
-1120  1984   
-16    1040   
752    -560   
-784   -48    
864    16     
-608   -272   
-448   96     
432    -240   
-256   0      
368    112    
64     160    
-304   -176   
-128   160    
560    -96    
-64    192    
-128   -48    
-48    160    
176    -48    
-448   384    
480    368    
-480   576    
32     -80    
288    -16    
64     0      
80     64     
-48    96     
0      -112   
-288   -80    
240    -96    
32     144    
-48    -16    
128    80     
-480   -160   
384    128    
-304   -80    
368    96     
-544   -208   
16     80     
128    400    
-272   -16    
0      16     
416    192    
-272   80     
176    112    
-16    192    
-208   -48    
-96    64     
128    -240   
-32    -336   
-336   -192   
-64    -272   
432    -256   
32     32     
368    448    
128    640    
-320   240    
128    -208   
368    -432   
-256   -336   
-400   64     
112    -16    
128    16     
-112   -32    
32     -144   
-224   -48    
96     128    
80     128    
-128   320    
48     240    
-16    160    
-48    16     
176    -176   
-112   -320   
96     -176   
128    112    
-192   112    
256    -192   
-256   0      
128    32     
16     32     
896    1776   
-2160  1904   
1072   -352   
96     -352   
400    544    
-432   144    
-112   288    
176    -32    
-128   368    
128    -96    
-96    112    
-32    96     
80     80     
0      112    
-96    -352   
16     176    
240    128    
16     48     
48     400    
-64    -240   
-128   -480   
160    -672   
256    928    
368    1040   
-608   -480   
160    16     
-128   320    
-112   176    
96     -144   
144    352    
-240   -480   
112    160    
80     -336   
-400   576    
0      352    
-272   160    
0      -64    
544    -592   
-48    976    
-224   -208   
-48    -80    
160    320    
208    160    
0      -368   
32     -448   
80     -160   
240    432    
-176   48     
-208   -304   
480    -592   
1232   -560   
-3088  288    
832    416    
384    -576   
-928   352    
560    784    
-480   304    
-112   368    
224    -560   
192    368    
-48    -928   
-208   -64    
128    112    
-48    64     
16     -304   
-16    208    
-64    -112   
48     608    
224    -512   
-192   320    
208    48     
-736   352    
2176   -448   
-752   944    
-928   416    
352    -1296  
160    -944   
-448   -2832  
432    2320   
368    2624   
-592   64     
704    -1168  
-16    -64    
-160   416    
64     336    
464    256    
0      224    
64     912    
-272   -48    
-144   32     
448    -96    
-240   176    
-48    -928   
-112   176    
32     -672   
-720   -208   
272    32     
176    -608   
-192   -304   
704    128    
-496   -192   
208    -32    
-384   -512   
-192   -240   
512    272    
-448   -128   
368    64     
-464   -1696  
464    1072   
-80    16     
-304   0      
256    -304   
128    0      
160    528    
176    -528   
304    512    
96     240    
-64    32     
272    -48    
-64    240    
-320   -288   
160    2096   
1840   448    
-1296  -48    
-176   -144   
640    624    
16     -224   
256    -480   
-208   256    
-288   -288   
-32    592    
384    -544   
-144   -80    
16     -560   
64     816    
192    144    
-96    256    
-80    -64    
-16    -480   
-48    -1312  
80     -304   
32     -16    
32     480    
-416   128    
560    880    
-512   912    
416    -496   
208    112    
-448   -416   
-80    -576   
144    -1312  
192    -336   
-256   32     
64     544    
224    -16    
64     272    
0      128    
288    -912   
-352   112    
-784   -400   
176    -1520  
240    -16    
48     224    
336    224    
-80    -496   
304    -176   
-64    176    
240    -544   
-64    544    
80     1040   
176    512    
-80    -192   
656    -1360  
-352   512    
-688   416    
608    1152   
784    864    
-32    544    
-64    656    
240    -976   
416    400    
432    400    
-176   32     
80     32     
-80    176    
192    -48    
48     -32    
112    256    
144    224    
-96    784    
496    416    
-368   -128   
160    -352   
32     -192   
32     -176   
128    -256   
-496   -1392  
160    -752   
80     -1408  
-112   -736   
144    -384   
432    -1200  
-1168  1424   
992    0      
-400   160    
336    336    
-192   -224   
-592   320    
480    -128   
-352   320    
512    48     
-256   -112   
-80    -176   
32     224    
192    -224   
-176   16     
128    112    
-112   32     
-80    96     
-64    -96    
80     -320   
-176   64     
-560   80     
1648   -320   
-720   -128   
-688   -48    
1136   -224   
-224   176    
272    80     
-224   432    
240    -48    
-112   -144   
16     48     
176    -176   
-48    32     
-112   32     
-96    64     
192    112    
-464   -64    
48     -304   
-192   -160   
16     -240   
0      0      
224    0      
112    -16    
-112   -144   
-16    -160   
-160   -32    
416    128    
-176   80     
-32    -112   
-816   -2080  
-496   -880   
496    48     
-624   304    
288    -64    
576    -48    
-80    352    
-320   -160   
-128   192    
96     -1024  
368    -176   
-112   96     
-80    64     
64     416    
80     -80    
-832   112    
608    -192   
-544   208    
432    0      
-240   80     
128    -160   
512    960    
-128   -896   
-1200  432    
1296   -304   
-1280  208    
912    112    
-256   0      
0      384    
160    176    
-80    -48    
-176   -144   
-32    64     
144    -96    
96     256    
-144   -272   
-16    160    
-16    -384   
480    -256   
-416   144    
208    16     
-64    -176   
656    416    
-128   -48    
-304   128    
-112   -224   
176    -624   
448    -272   
-448   -592   
176    -144   
368    -112   
-288   96     
-96    224    
0      224    
-448   -208   
-320   96     
496    -64    
-1120  -400   
976    -448   
-384   64     
208    -224   
0      64     
-112   96     
-560   0      
464    96     
-176   -16    
-128   144    
-432   -176   
-368   -64    
208    0      
1184   5552   
-256   1968   
-848   -864   
1568   -464   
-640   -64    
-848   48     
304    128    
416    80     
144    -32    
-1120  96     
448    48     
-112   32     
64     -48    
128    -16    
-176   16     
-96    208    
224    48     
-64    -32    
-336   -32    
-288   768    
368    816    
-496   384    
176    0      
-112   -80    
16     -48    
0      0      
192    128    
-496   352    
832    272    
-320   160    
32     96     
128    176    
-208   240    
-256   32     
64     528    
160    448    
-496   416    
96     192    
-400   48     
480    224    
-64    -112   
-256   128    
176    384    
-16    272    
112    -288   
96     -656   
144    336    
-288   928    
240    480    
0      192    
-160   224    
-96    32     
336    704    
80     288    
-80    144    
208    16     
-272   416    
160    848    
80     320    
48     96     
64     64     
-304   96     
128    64     
160    -48    
-176   -240   
-64    288    
-304   544    
384    -240   
-336   32     
128    928    
-192   736    
-144   -320   
96     -96    
160    144    
-80    256    
-32    288    
48     736    
176    -16    
-112   352    
-176   144    
16     -288   
-288   -624   
688    -1600  
-368   368    
160    176    
-80    -592   
-368   96     
0      -1008  
128    -320   
144    224    
-384   16     
96     -224   
144    176    
80     -96    
-384   96     
144    -128   
16     -32    
176    208    
-656   -96    
-160   32     
-32    -288   
-128   -48    
640    -80    
32     208    
-208   -144   
-400   352    
32     208    
48     144    
176    -320   
-112   -208   
-48    -48    
-96    256    
144    80     
64     -160   
-112   0      
240    192    
-240   368    
128    448    
448    176    
-304   320    
-240   48     
640    -128   
32     144    
64     0      
-560   64     
0      0      
-224   -64    
560    -112   
-304   192    
-144   96     
208    192    
-288   -896   
1696   -1840  
-800   144    
880    240    
-192   -320   
-400   -144   
-160   -288   
80     400    
384    -752   
-64    -160   
-256   208    
128    688    
224    320    
-80    -384   
-80    352    
208    352    
112    272    
-48    160    
-80    -176   
416    -320   
-128   496    
144    -800   
-1904  1136   
1632   -480   
-848   -528   
560    -560   
0      48     
64     400    
-1264  0      
224    -1296  
176    -1328  
-416   -304   
176    512    
-16    256    
-416   208    
-128   -288   
128    80     
336    464    
-720   80     
64     -304   
176    -272   
-128   160    
-80    208    
112    -32    
-160   160    
416    496    
-160   592    
192    512    
-464   -1248  
-96    -368   
336    -48    
-352   -16    
16     0      
208    160    
-80    -48    
-96    -112   
800    80     
128    1648   
-400   1232   
-224   256    
592    -32    
-288   -80    
-128   160    
-240   -720   
-64    -288   
128    -224   
-384   288    
432    288    
-176   -496   
320    -176   
-128   96     
-528   2944   
400    224    
-640   336    
48     -592   
224    416    
1232   704    
-1232  464    
-512   -752   
896    -256   
384    112    
-384   80     
-544   -48    
416    -64    
320    -128   
-48    48     
32     -928   
-224   48     
304    -224   
256    -912   
-336   288    
112    560    
-176   704    
512    16     
240    16     
-576   -32    
496    400    
-384   32     
208    80     
288    -176   
-304   384    
144    16     
-176   368    
128    -64    
560    -80    
-48    48     
-176   -48    
-112   -272   
32     16     
-224   112    
128    192    
-16    -48    
-96    -96    
-112   -144   
128    -224   
240    144    
-224   688    
64     976    
192    -512   
-624   -240   
208    -64    
96     -16    
-448   224    
784    -96    
-112   -400   
-32    -64    
224    96     
-192   112    
336    304    
16     -64    
-96    144    
0      0      
-16    128    
128    -512   
-48    176    
-16    -432   
48     192    
-80    48     
160    0      
208    624    
-560   320    
320    -80    
32     -32    
80     -32    
-112   16     
64     112    
-80    144    
688    -352   
-304   -432   
-48    208    
192    -48    
-480   -832   
1200   -1168  
-1600  960    
992    -336   
-256   224    
-464   32     
80     192    
736    48     
-32    -400   
-192   144    
32     -736   
192    64     
48     256    
64     288    
-336   -144   
160    -32    
288    -208   
-208   400    
144    -48    
-80    16     
112    144    
-368   -1296  
528    224    
432    -480   
-608   400    
688    16     
-80    -80    
48     144    
-176   32     
256    -1264  
-80    176    
464    0      
-128   208    
-272   64     
-128   272    
800    -32    
-208   -128   
160    80     
-128   -16    
272    160    
-16    -128   
64     32     
16     -224   
-16    128    
256    -96    
-480   -144   
496    208    
-128   -240   
-208   128    
320    0      
800    -96    
-288   688    
-64    80     
384    -288   
208    -1008  
0      -80    
-144   -112   
-192   256    
368    -64    
160    144    
128    -144   
-272   144    
80     -272   
144    32     
-576   -160   
-528   -736   
464    64     
64     -192   
-320   -64    
432    -416   
-32    -144   
-192   -656   
1200   624    
-544   0      
-144   -16    
848    -128   
-816   144    
-16    -208   
416    304    
304    -208   
-224   -64    
-352   80     
320    -176   
-112   -224   
-96    48     
384    -96    
-528   0      
272    48     
80     48     
-16    288    
-176   -80    
-160   160    
528    448    
-976   -96    
-80    -128   
384    32     
-608   -80    
0      -16    
-416   -1104  
-640   336    
832    192    
-560   48     
128    112    
-144   16     
48     32     
-128   -144   
112    -48    
-256   112    
464    160    
-160   -144   
352    -176   
-544   -32    
-16    -64    
320    -48    
-16    -32    
-64    -160   
336    -320   
96     48     
368    -528   
-144   96     
-816   416    
2192   192    
544    -16    
-1584  48     
-416   -16    
-176   16     
960    304    
-176   -96    
-816   224    
480    -128   
-496   256    
384    -304   
48     224    
-32    -288   
32     176    
384    80     
-272   -80    
-128   128    
256    -208   
-656   -288   
336    160    
-32    304    
176    -16    
-1024  -80    
432    -240   
-272   -80    
-352   16     
432    32     
-448   -416   
160    -80    
80     -880   
0      -384   
-192   -128   
-32    48     
320    -304   
-384   -336   
32     -16    
-400   -80    
-528   -624   
512    -656   
32     -80    
-80    -128   
144    320    
176    -528   
0      96     
64     224    
240    240    
0      -208   
32     368    
112    1072   
208    64     
-272   -656   
-144   -240   
160    -112   
-224   -800   
448    -144   
-288   -464   
-368   -1488  
144    -432   
304    1648   
-192   512    
176    -112   
-96    -144   
272    64     
-336   -240   
352    -320   
64     560    
16     304    
-208   224    
-288   -224   
224    720    
-320   -240   
-48    112    
-160   -416   
-304   144    
240    448    
-224   32     
112    -368   
-112   -32    
-128   208    
48     -16    
336    -16    
320    -352   
-1152  0      
-64    -80    
128    80     
-96    64     
0      128    
-176   208    
-192   80     
112    -48    
144    32     
-48    16     
32     144    
-64    96     
-368   64     
128    -80    
-400   -32    
160    -32    
-256   -176   
176    48     
-160   112    
-192   992    
864    -208   
-848   0      
176    -48    
-64    32     
-80    192    
96     208    
48     352    
-560   -48    
-240   -48    
288    16     
48     16     
-48    80     
272    96     
-400   -240   
-96    80     
144    240    
-96    400    
-16    128    
-96    64     
-208   320    
208    16     
-160   224    
-288   -48    
112    224    
-608   48     
-16    -96    
-400   -352   
432    -80    
-416   -400   
944    -112   
1680   -368   
-1696  -256   
672    -736   
-16    -32    
-144   -80    
-528   -688   
176    1152   
-80    112    
-64    -848   
-48    560    
32     -96    
-240   -16    
384    -112   
16     -80    
-192   128    
32     16     
-160   -704   
464    288    
-176   624    
112    -640   
-1232  1040   
1664   -416   
-1472  112    
496    576    
-96    736    
320    1552   
-1472  1920   
256    1504   
608    1744   
-144   480    
208    0      
-96    -96    
-352   176    
-48    64     
240    0      
288    944    
-656   496    
-336   -336   
368    720    
400    240    
-352   240    
-1008  -432   
832    288    
-240   528    
-464   -688   
-512   -128   
320    -336   
-304   432    
432    256    
-416   80     
-208   -96    
416    80     
176    -192   
80     352    
-64    -48    
272    80     
416    48     
-592   -256   
176    48     
160    240    
-336   64     
496    560    
-688   432    
336    16     
-560   -16    
-160   112    
112    48     
-272   80     
-160   -1376  
880    -800   
352    336    
-416   288    
-1120  192    
160    0      
1024   -224   
-544   368    
288    144    
-528   288    
704    -64    
-208   32     
80     96     
64     272    
-656   0      
640    96     
-240   -80    
96     64     
64     48     
-224   976    
752    1584   
-240   720    
-80    -192   
496    -16    
-64    -32    
32     176    
32     96     
32     304    
208    -160   
-288   80     
96     32     
160    336    
96     416    
-240   144    
400    160    
-336   -80    
336    288    
-544   -48    
112    224    
224    192    
-144   144    
64     0      
-96    64     
-176   32     
320    32     
-208   -80    
288    -112   
-240   -96    
0      -48    
128    32     
-64    144    
-80    112    
-176   -688   
-512   304    
240    80     
112    -32    
0      -96    
96     -144   
80     128    
-32    128    
-240   192    
320    112    
-64    -16    
-96    16     
64     208    
16     192    
-32    64     
-32    -96    
48     0      
304    544    
-512   240    
272    64     
80     32     
-96    112    
48     64     
-48    64     
128    416    
-208   0      
64     -464   
-16    368    
112    160    
-368   -352   
912    -1856  
-1584  656    
1440   -240   
-544   0      
-528   320    
48     288    
896    176    
-192   -272   
-432   -608   
96     -128   
0      176    
368    96     
-176   176    
-32    448    
80     -16    
-160   -256   
304    400    
-224   -16    
-112   -144   
192    144    
-512   -352   
1248   -336   
-576   80     
-480   -208   
656    256    
128    -2032  
-144   448    
-320   304    
240    -96    
-160   144    
240    16     
-160   336    
192    64     
-16    -16    
160    48     
-128   -288   
-80    208    
352    -48    
-464   112    
224    16     
-32    -608   
144    64     
-160   80     
-16    -32    
-176   112    
624    160    
-48    96     
-16    16     
-256   -16    
896    1168   
-384   1248   
320    880    
480    96     
-288   -592   
272    -80    
-336   -368   
64     -208   
32     -1696  
352    144    
96     96     
-96    96     
32     -224   
48     160    
-336   128    
864    320    
-432   0      
64     48     
336    -16    
-256   -240   
80     32     
-80    32     
336    304    
1184   -352   
-784   496    
656    272    
-176   -16    
-80    96     
224    80     
512    352    
16     48     
-320   64     
240    48     
64     80     
16     -16    
192    272    
208    -48    
-176   128    
160    64     
16     -96    
-128   -80    
32     112    
48     128    
336    -48    
-1024  240    
1456   -96    
-320   176    
-384   -224   
464    336    
-32    -560   
208    96     
64     -1232  
-272   48     
144    -80    
176    -32    
0      -592   
-240   32     
-64    -96    
608    176    
-16    80     
80     256    
-224   32     
224    64     
-560   304    
224    -496   
-240   -96    
336    -848   
-80    320    
160    -160   
-528   -128   
1088   -336   
-784   -1504  
-528   -224   
48     64     
-208   224    
1184   176    
-224   -192   
-416   176    
-640   -304   
560    -240   
464    64     
112    64     
-320   -16    
-128   336    
208    240    
160    -16    
128    -1472  
-112   272    
-144   -32    
-64    -192   
528    -688   
-160   -16    
32     272    
-176   32     
896    -208   
-608   -528   
144    -112   
-352   -528   
-32    -528   
192    -1376  
0      384    
48     -240   
-128   16     
496    -64    
-80    160    
-560   176    
80     -352   
32     -256   
208    -112   
208    -592   
-208   32     
352    592    
48     -288   
128    -208   
416    0      
-960   -800   
128    -560   
48     -112   
208    80     
128    176    
-336   -128   
224    96     
496    656    
-1216  528    
832    352    
192    592    
-416   0      
-16    -304   
-304   544    
160    -112   
16     16     
-80    -352   
112    144    
-112   256    
144    464    
-160   528    
32     -208   
-768   -256   
-16    -240   
-304   -256   
144    -464   
112    -32    
-32    160    
-16    16     
-80    -448   
-16    112    
0      -144   
-64    0      
400    -32    
-80    192    
-304   32     
160    -96    
-48    -64    
-1264  448    
384    0      
32     144    
272    96     
16     -384   
16     272    
80     32     
-48    -176   
80     -96    
0      144    
-144   208    
0      -240   
-32    -176   
-64    -224   
-48    64     
-272   48     
64     -208   
352    -400   
-272   64     
576    -288   
-1504  128    
800    -608   
240    320    
-64    80     
-272   -240   
288    -416   
16     -272   
-32    160    
-80    240    
-112   16     
16     -224   
-928   -112   
176    -64    
-32    96     
64     -208   
-272   -32    
400    -176   
-480   -752   
80     -640   
160    96     
-80    48     
-144   48     
-272   176    
400    48     
-96    0      
-96    48     
352    -96    
-448   48     
144    -304   
-1440  -912   
1200   352    
-48    -784   
-1024  -288   
640    1264   
816    -160   
-544   496    
-368   -496   
320    -272   
112    -464   
-400   176    
144    416    
-96    720    
80     160    
80     80     
256    -448   
-80    304    
-128   -768   
-48    208    
256    80     
-624   -672   
1504   496    
-1568  -288   
368    1600   
240    -1840  
-1680  720    
1536   96     
-1296  -560   
-864   -928   
48     -80    
-720   -240   
224    176    
-112   -304   
-80    240    
288    384    
-448   -144   
-16    -16    
336    128    
32     144    
240    80     
-688   288    
-208   0      
640    672    
-688   -480   
-352   464    
-32    64     
-512   -432   
592    -144   
-352   240    
48     16     
-96    112    
-528   256    
-176   -96    
112    112    
-592   48     
240    752    
-1136  368    
448    -128   
-560   128    
-16    144    
0      64     
-48    80     
160    -48    
112    -16    
-352   -128   
176    -80    
224    80     
224    128    
-368   -32    
-912   -384   
-512   -2368  
-112   -128   
-304   -272   
-752   -96    
1216   496    
-32    -176   
-608   256    
-96    -128   
256    528    
-352   -368   
144    288    
416    -192   
-576   224    
160    -144   
-192   -32    
64     -192   
-400   224    
32     -32    
416    560    
-880   416    
688    368    
48     -80    
-288   80     
-608   0      
592    112    
-192   -144   
0      112    
224    -304   
-288   192    
160    144    
-32    144    
-512   -96    
144    -112   
-336   -288   
704    256    
-144   -32    
144    16     
288    -48    
-352   96     
704    192    
-592   -32    
176    160    
256    96     
-112   208    
384    320    
-544   128    
240    -96    
48     -16    
-528   -112   
336    128    
256    96     
-32    -128   
304    -304   
-480   176    
1152   256    
-480   224    
-352   -240   
-16    -128   
96     112    
96     -80    
112    -96    
-400   -112   
0      160    
-80    -128   
-192   64     
80     64     
32     -544   
-64    -624   
128    -16    
-864   576    
576    80     
-144   -96    
32     -128   
-96    48     
-96    32     
-32    -16    
-64    384    
48     -112   
-256   -544   
160    -32    
96     224    
-1152  -144   
2016   -1136  
-912   -160   
-320   -240   
864    256    
32     192    
-912   752    
176    288    
-272   -432   
192    208    
176    224    
-240   -192   
-160   304    
112    -80    
336    -224   
-16    96     
-336   224    
80     80     
224    64     
64     0      
592    1104   
-1712  608    
688    -224   
384    32     
128    -16    
-176   16     
-128   -224   
-240   480    
288    -144   
16     80     
-144   64     
-96    176    
80     -160   
-80    96     
224    48     
-144   224    
48     208    
416    240    
-656   288    
160    96     
-160   192    
144    -64    
-32    224    
32     -64    
80     336    
-32    16     
-144   320    
64     -112   
0      80     
176    880    
-1600  304    
4672   864    
-512   1168   
-1760  -64    
1952   16     
-720   -352   
-448   288    
608    304    
48     272    
-208   -64    
-48    16     
208    16     
-32    240    
192    -288   
-496   64     
640    32     
-336   160    
208    0      
-352   -256   
16     -240   
16     272    
-304   528    
1856   -160   
-1232  112    
144    -704   
128    -944   
208    272    
-128   144    
240    64     
-144   48     
64     192    
144    176    
-592   352    
256    -112   
-304   48     
656    48     
-96    176    
-144   304    
288    -80    
-160   0      
64     48     
112    -48    
320    416    
128    48     
496    -176   
-368   416    
-576   -1136  
720    80     
-208   144    
80     -48    
688    80     
-128   -176   
144    64     
-80    256    
32     448    
960    384    
192    416    
-704   -528   
80     144    
640    960    
-768   352    
80     -176   
224    128    
-16    -256   
-96    -176   
-288   -288   
112    -848   
-48    176    
-16    -128   
304    16     
1408   2704   
-1280  1760   
0      -464   
1696   -96    
-672   -144   
-640   624    
464    336    
640    -208   
-176   1376   
480    528    
-112   96     
64     -320   
160    16     
64     272    
-64    -368   
-320   -592   
352    192    
288    -224   
-112   368    
-32    400    
-16    160    
128    -32    
-272   -640   
544    400    
-112   320    
0      720    
192    304    
272    688    
160    -1808  
-144   560    
112    64     
128    80     
304    -608   
-32    720    
96     1184   
-128   1264   
304    32     
0      -272   
-320   -704   
304    560    
-32    224    
448    -32    
-48    -48    
64     192    
-48    528    
240    -64    
-160   96     
240    -672   
-16    192    
-176   144    
192    256    
-208   -1312  
-336   -352   
368    368    
224    -112   
352    128    
-240   -1312  
896    16     
-144   1328   
-80    464    
-256   -560   
192    112    
80     -96    
-224   -48    
-144   -368   
64     80     
304    144    
64     -16    
32     128    
64     -336   
-160   48     
96     -704   
96     256    
80     -336   
80     128    
-64    128    
400    256    
-160   704    
224    352    
32     16     
-32    -144   
560    528    
-768   320    
576    -224   
-48    240    
-16    -304   
-224   -128   
48     96     
-192   -400   
-16    -64    
48     -224   
-80    16     
-64    48     
240    -368   
-96    96     
-48    -224   
352    -1760  
48     -128   
-256   -1616  
128    96     
96     352    
-384   -608   
320    48     
-368   -176   
-160   -352   
832    -624   
368    -1632  
-80    0      
-464   -1088  
0      16     
528    320    
368    -864   
-544   -496   
-192   -944   
144    -32    
272    -640   
112    -80    
-400   -464   
96     240    
96     -752   
208    416    
32     -176   
-272   256    
32     128    
-80    -144   
432    -48    
144    -288   
-272   -16    
112    -480   
384    304    
-352   -48    
-224   2144   
2384   480    
-1168  -432   
576    112    
-128   -432   
272    64     
-96    48     
-320   -384   
256    -528   
-224   80     
400    -16    
-240   112    
-32    -352   
432    -128   
48     -512   
-112   -80    
-48    -544   
-96    -176   
-64    -16    
224    240    
-80    -112   
-816   -384   
1360   -896   
-176   368    
-240   -176   
-112   640    
912    176    
-624   -544   
240    -176   
224    112    
-176   -48    
496    176    
-80    176    
-336   -176   
384    128    
-160   -64    
320    -112   
-16    160    
-16    64     
16     96     
176    -224   
-208   -16    
-816   336    
560    -576   
-80    496    
384    416    
-192   672    
-976   608    
-752   -944   
1024   -464   
304    128    
-432   128    
-64    160    
320    -240   
48     -272   
176    -720   
-720   -336   
512    -176   
304    336    
224    304    
-624   128    
144    -704   
480    32     
-432   -368   
0      -64    
448    640    
160    -128   
-432   32     
416    48     
-544   -1264  
-1904  -2512  
448    -64    
-432   1040   
-176   -272   
304    16     
16     16     
-656   -240   
288    144    
448    432    
-784   -144   
112    64     
240    -128   
-112   -80    
0      0      
80     48     
144    -112   
-144   144    
80     -192   
192    480    
-864   -32    
496    544    
576    -304   
-624   96     
-560   -656   
-320   -96    
416    176    
-48    48     
112    -32    
-176   -16    
-32    48     
272    -96    
32     112    
-32    -96    
-480   208    
-192   -448   
192    304    
304    -160   
-528   -160   
896    -688   
-192   -160   
144    192    
-224   272    
-144   96     
352    -160   
-128   -16    
64     -288   
-720   -528   
528    -96    
224    192    
-448   400    
-128   352    
-112   880    
-208   336    
-128   416    
256    0      
-592   64     
-592   -112   
336    -80    
-624   512    
-208   160    
128    96     
96     32     
-144   32     
-16    0      
-144   -160   
80     112    
0      -192   
-320   176    
224    336    
-224   96     
0      -240   
0      -272   
-192   256    
-480   240    
192    32     
-480   16     
144    0      
-528   16     
-32    288    
-16    -256   
128    80     
-912   -112   
2112   -688   
-1216  -224   
-480   -192   
944    176    
-208   128    
-240   -32    
-208   -704   
48     208    
-704   192    
-128   -240   
32     -32    
-112   64     
336    224    
-384   800    
192    -496   
-400   80     
80     64     
-208   -272   
224    48     
544    1264   
-1456  448    
384    -272   
608    160    
-240   -160   
-32    80     
-1392  -400   
656    -496   
-64    96     
176    -16    
-144   160    
-256   32     
192    -240   
0      160    
80     80     
-368   160    
288    0      
-192   64     
16     -48    
-208   -16    
96     336    
-384   64     
64     112    
0      -80    
16     272    
208    144    
-368   208    
224    -48    
-48    144    
448    -32    
-1760  -960   
1536   384    
-208   -240   
-592   112    
592    224    
-48    704    
128    352    
-64    416    
-480   -352   
208    48     
0      0      
112    128    
32     16     
80     368    
-416   144    
128    400    
288    16     
-96    64     
-112   96     
-240   -16    
-32    -240   
864    912    
-160   -32    
-224   144    
-304   896    
-320   560    
32     -48    
-176   -608   
-64    32     
-96    176    
256    -144   
-64    64     
0      -48    
-32    256    
-384   128    
-224   16     
384    64     
-192   384    
144    -144   
-16    32     
-32    224    
208    208    
-32    112    
96     192    
192    112    
-80    832    
208    -784   
512    -1888  
-656   -1360  
512    -128   
176    112    
-128   128    
-80    208    
112    176    
-512   544    
112    480    
-304   -384   
160    -448   
-96    -16    
-160   -16    
-64    -208   
48     48     
-112   0      
0      128    
-64    -64    
-320   -1024  
-352   -544   
-176   0      
-96    -400   
32     -224   
32     -96    
688    1216   
1392   800    
-2272  -864   
208    -944   
720    -352   
-208   0      
128    192    
-496   16     
32     672    
32     -352   
256    272    
-352   -48    
-96    208    
32     32     
112    -48    
224    -16    
-112   432    
352    160    
112    688    
-432   -496   
224    -64    
-64    304    
464    304    
-144   544    
-272   1200   
224    -64    
640    560    
-160   304    
0      -336   
48     560    
80     -160   
240    400    
-16    304    
-144   416    
-192   608    
384    288    
80     -176   
-592   -384   
96     400    
256    96     
112    -176   
272    96     
-240   512    
-96    -560   
-16    80     
96     528    
-528   -1024  
-64    272    
352    432    
176    336    
144    1040   
-592   -176   
-208   592    
528    512    
-176   -656   
-128   -16    
-272   -160   
336    64     
80     224    
224    192    
-32    96     
-160   160    
64     144    
240    32     
-48    0      
288    -112   
0      16     
-256   368    
336    -432   
-16    -736   
-112   320    
80     -64    
32     -112   
-128   -320   
-32    192    
-224   480    
176    32     
-320   304    
-64    560    
224    48     
176    832    
-720   -208   
384    -272   
672    704    
-192   160    
544    624    
-512   -1568  
0      -480   
560    -592   
-96    96     
-80    336    
-48    272    
304    -144   
48     176    
-96    48     
48     -144   
-144   -336   
288    -48    
192    336    
-288   -32    
-96    336    
208    -1488  
464    576    
-16    96     
-256   -336   
128    736    
176    -128   
304    -64    
-64    -64    
-112   368    
32     512    
176    240    
-96    -272   
0      224    
112    -176   
-64    240    
96     -336   
-208   -160   
144    -704   
-32    -112   
96     128    
112    16     
96     -80    
-16    192    
128    288    
-304   208    
0      16     
176    -128   
-64    -32    
416    -160   
-880   -288   
-400   112    
640    384    
-528   -672   
528    368    
112    -176   
-656   176    
512    -448   
-48    96     
-32    -160   
64     256    
80     80     
48     -48    
-192   80     
528    80     
-272   -16    
80     -144   
272    368    
128    -1072  
-112   128    
-16    112    
480    1024   
-288   -816   
-1168  320    
1488   160    
-880   112    
112    144    
96     224    
-352   112    
1056   -240   
-272   160    
-160   -240   
160    160    
288    -96    
-16    64     
-384   -16    
160    16     
240    496    
80     176    
-48    48     
416    -512   
-80    -144   
768    224    
-880   272    
512    -416   
192    544    
-288   416    
-64    48     
-400   624    
-576   16     
-320   -176   
880    -208   
-288   -112   
112    -1392  
336    224    
-240   704    
-240   -288   
-32    288    
304    -544   
160    -80    
-16    128    
368    -288   
288    192    
-192   176    
64     -1136  
-544   112    
848    -480   
512    -128   
-352   -96    
800    1296   
1648   2896   
-3088  1184   
1552   -784   
1072   -1472  
-608   176    
-720   128    
464    80     
1088   -48    
-720   -288   
-480   -208   
256    176    
80     96     
112    0      
-16    48     
0      -160   
-592   -48    
16     -688   
128    -48    
-48    -352   
-16    1264   
928    -176   
-864   240    
592    -992   
-912   -256   
656    -80    
96     48     
-336   352    
800    336    
-816   16     
-112   -272   
-816   -48    
160    -160   
-128   16     
416    64     
-672   -32    
480    192    
-144   -400   
-144   -800   
112    -176   
-48    80     
304    96     
-640   -224   
432    -32    
-336   160    
-64    -64    
272    -16    
256    -224   
-608   -80    
272    -176   
-80    -256   
176    -480   
-288   -272   
624    -976   
-64    160    
80     -16    
288    -80    
-400   64     
176    -160   
160    -432   
-384   -176   
-112   -16    
128    -176   
-320   16     
-80    -208   
192    -128   
32     -256   
-32    -240   
288    -352   
-64    320    
176    224    
368    208    
-368   -176   
192    -192   
-256   80     
80     224    
48     -16    
96     48     
-48    752    
-16    608    
-512   80     
160    -208   
-112   -2544  
-464   656    
944    -48    
-1136  -272   
1456   -448   
-560   448    
-32    304    
-352   192    
608    64     
-48    32     
-208   32     
-208   -48    
208    80     
0      48     
-128   -32    
144    -400   
80     -192   
96     288    
208    -720   
-96    -64    
-160   416    
-576   176    
-64    -208   
368    -128   
128    -432   
-240   -352   
-128   -336   
288    -400   
-560   -400   
112    -432   
-80    288    
-16    -64    
96     160    
176    -304   
-224   -112   
-208   208    
352    576    
-80    -80    
-96    -48    
128    -224   
144    -160   
-192   112    
48     -32    
-48    -144   
-16    48     
176    16     
-368   -128   
272    464    
-720   -192   
-1056  -528   
-432   -896   
-608   656    
1376   -96    
-1072  -256   
-144   400    
560    -304   
-1040  1440   
368    320    
-160   -624   
-256   -640   
128    64     
-112   -96    
96     32     
-240   -32    
-128   288    
224    432    
-384   368    
-32    880    
-672   544    
-432   -464   
-192   -1232  
1248   944    
-128   -112   
-1024  -1216  
448    -704   
-32    1312   
-192   1568   
512    1680   
-80    784    
-96    288    
-176   -336   
64     -480   
-32    128    
-144   208    
80     96     
-192   16     
-64    160    
144    80     
-544   -288   
-192   -1376  
208    -320   
16     -224   
-16    768    
-576   -1184  
-80    -480   
96     96     
48     64     
-320   -304   
256    1504   
64     1888   
-688   128    
768    -176   
-160   208    
-464   176    
448    128    
464    528    
256    320    
-352   400    
-736   64     
576    416    
-560   304    
128    496    
0      80     
240    -208   
-16    592    
-48    -80    
-240   -16    
-48    32     
-240   544    
-160   -368   
-160   -880   
1824   -512   
448    96     
-880   1168   
272    1184   
-128   672    
416    -256   
-400   -1376  
-224   352    
-384   320    
-464   80     
672    -144   
-432   -448   
-160   896    
80     -352   
-176   160    
-32    416    
160    -128   
176    -96    
-128   -272   
-64    256    
0      112    
272    96     
-752   144    
624    -16    
-384   -208   
352    -352   
32     32     
-128   896    
112    912    
-176   -208   
64     -304   
304    144    
-64    64     
-400   160    
128    64     
-80    160    
208    240    
-112   1152   
-80    768    
-160   -224   
352    0      
-80    -240   
-256   16     
-400   -400   
480    944    
48     1200   
384    480    
48     96     
-160   -224   
-80    -112   
656    1072   
-960   832    
16     -144   
688    -256   
-912   -384   
48     592    
704    816    
112    416    
-352   -784   
64     -672   
-144   -480   
32     32     
96     240    
-256   32     
112    176    
80     -112   
-48    -80    
-400   112    
352    272    
32     224    
48     288    
-80    -16    
-80    -144   
-240   176    
240    -304   
-128   -160   
0      384    
80     464    
80     176    
80     -304   
-640   -1776  
352    -512   
-512   -320   
272    32     
320    704    
-368   544    
96     320    
-176   -224   
-48    -752   
-192   -416   
224    -96    
-128   -80    
48     96     
144    304    
48     304    
-160   0      
-112   -384   
-32    -560   
16     32     
176    -32    
160    688    
-896   -240   
624    144    
96     -16    
-272   -160   
224    16     
-272   160    
128    560    
16     -128   
96     320    
-48    -144   
-80    0      
0      -48    
128    112    
-256   0      
0      224    
176    32     
-64    256    
256    -256   
-320   192    
304    48     
-336   96     
208    112    
-112   -80    
112    -112   
320    -80    
-320   64     
96     80     
144    256    
-608   480    
-704   912    
3632   528    
-1648  656    
-560   -224   
1408   208    
-256   32     
-736   -80    
864    112    
-208   -160   
-272   144    
240    48     
48     128    
-192   -112   
352    96     
32     -96    
0      -16    
208    160    
-48    96     
-256   32     
-160   96     
176    112    
-432   -512   
-448   720    
1488   -528   
-432   -48    
-832   144    
1056   384    
-224   48     
-432   192    
432    64     
-304   -704   
272    176    
-16    32     
144    512    
-208   -48    
-432   224    
608    320    
-336   128    
32     48     
64     256    
-16    -144   
64     -128   
656    128    
-640   -304   
272    -16    
208    -1456  
-400   -304   
528    -2480  
-480   -128   
0      0      
288    112    
128    80     
-304   -288   
-256   -16    
80     -160   
480    320    
-320   512    
-272   -656   
0      -560   
64     640    
-224   96     
96     -224   
-112   -224   
-64    144    
-32    96     
-272   48     
864    -80    
-400   224    
-592   64     
352    336    
704    -4256  
-2512  -752   
2256   704    
-1600  -336   
320    480    
1088   -304   
-992   224    
-144   -752   
448    -80    
832    -2544  
-368   144    
-176   16     
-128   144    
320    -96    
144    0      
352    48     
-512   160    
240    128    
0      -208   
368    1056   
384    -16    
-736   400    
624    -80    
-720   96     
240    -208   
-16    96     
-64    320    
304    112    
-400   80     
544    192    
-304   224    
144    48     
80     64     
-112   -144   
208    -96    
-320   -576   
304    -176   
-448   -272   
176    -128   
0      -16    
0      160    
320    -496   
-144   144    
464    -192   
-608   -144   
-336   32     
480    -16    
48     80     
-160   -96    
-96    80     
192    -288   
-160   -304   
400    -592   
-32    640    
640    1088   
16     480    
-64    -432   
-16    288    
-304   512    
176    64     
-48    -464   
-112   -224   
16     80     
64     -48    
304    -64    
-48    0      
-80    272    
-224   -304   
112    32     
0      -736   
112    208    
-256   416    
640    -496   
-128   800    
-240   -1200  
16     -2624  
-128   -32    
560    -1088  
-272   -496   
112    464    
-176   176    
992    1232   
-1808  1184   
1264   -464   
80     896    
-304   -128   
-192   32     
16     -1136  
272    832    
-128   -288   
208    -32    
112    336    
-96    -352   
176    32     
-96    -368   
-128   -336   
128    336    
112    -32    
0      96     
48     -224   
64     -608   
0      480    
-112   -528   
272    112    
528    1344   
-144   -16    
-1392  -352   
-64    144    
768    496    
-112   -32    
-112   -848   
96     400    
192    96     
0      -544   
112    272    
-224   -592   
0      288    
480    -224   
-288   -352   
-208   704    
-160   592    
80     32     
240    -480   
-112   -80    
-176   -112   
192    272    
96     -80    
32     -48    
-32    -192   
-96    16     
-128   32     
1504   1584   
-1280  800    
-1840  -736   
2032   560    
-432   800    
-640   32     
528    912    
-528   -32    
-128   -416   
224    384    
272    -560   
-288   -112   
192    -544   
112    64     
-272   0      
-16    64     
192    -192   
-64    -160   
-480   -96    
32     144    
32     -16    
-704   880    
1824   -448   
-512   448    
64     624    
-256   48     
-48    -464   
656    -2032  
-384   -544   
176    144    
400    976    
-144   -640   
80     -32    
48     672    
-64    -496   
-144   -432   
400    -192   
-880   208    
848    -32    
-32    288    
-96    -448   
224    -16    
-464   -1168  
160    -464   
608    -3248  
-176   -832   
-368   -176   
-352   -2032  
-912   -1536  
368    -1280  
-912   -128   
128    256    
320    160    
-160   320    
-176   -1248  
-352   -160   
112    -80    
-576   -1280  
560    -160   
-144   -832   
-272   -448   
288    16     
-80    160    
-112   48     
-112   0      
304    256    
-48    112    
320    560    
-208   480    
-272   240    
0      -256   
704    1232   
832    -272   
-1696  -352   
496    -928   
512    384    
512    480    
176    464    
-1072  544    
176    -1104  
448    496    
256    64     
-320   224    
-224   432    
16     -736   
704    224    
0      400    
-464   64     
96     128    
448    -304   
-864   -1056  
-480   -448   
128    112    
192    -128   
-32    640    
208    560    
-224   -816   
-768   -1056  
272    -320   
-336   -272   
224    -80    
-112   144    
-624   -240   
128    -144   
-448   -512   
-16    160    
176    608    
-192   -80    
80     -432   
-432   -160   
0      240    
112    208    
-128   192    
16     -64    
-416   -16    
160    -624   
-576   -688   
160    -384   
-448   -368   
64     -464   
128    -560   
-656   -80    
352    656    
960    224    
-1424  96     
384    240    
-64    -112   
112    416    
384    368    
-64    400    
320    96     
-272   288    
-16    -112   
96     320    
-176   384    
32     224    
80     -64    
-720   -16    
464    336    
-640   560    
176    32     
80     176    
240    288    
-480   160    
128    112    
272    -208   
-160   -384   
-192   80     
320    224    
-64    336    
0      48     
944    384    
-1888  1264   
1424   -64    
80     224    
224    -64    
-512   0      
-48    96     
-448   -288   
-48    -96    
384    -288   
-256   400    
-160   64     
288    160    
32     64     
-352   -320   
-32    -624   
128    448    
80     64     
-352   -32    
288    -112   
-480   -208   
800    528    
-400   272    
-144   -80    
512    -80    
-528   -336   
208    -272   
-192   320    
256    112    
-416   192    
16     48     
0      -16    
32     48     
-96    -80    
-192   64     
-272   -16    
336    -80    
-384   -192   
128    304    
-144   -96    
-288   32     
448    80     
-128   128    
160    144    
-304   80     
576    16     
-640   -80    
320    176    
32     96     
-128   -112   
-480   -608   
192    768    
-560   320    
160    336    
80     128    
-544   144    
1168   160    
-256   256    
-208   -16    
16     -16    
288    192    
-272   -48    
144    208    
144    112    
-528   -32    
144    48     
288    160    
-384   -128   
16     32     
-80    -16    
-80    96     
624    1184   
-848   -704   
-1008  80     
1440   720    
-1872  -48    
128    112    
400    -128   
-1040  -16    
480    0      
64     -160   
16     144    
-32    64     
0      112    
-32    256    
-256   -48    
-64    176    
80     32     
-96    -240   
96     -224   
160    48     
-48    64     
-112   464    
1312   -32    
-960   -80    
464    128    
352    288    
-848   768    
-304   224    
464    -368   
112    -240   
224    144    
-208   0      
-96    -160   
176    -16    
832    -160   
-688   224    
432    480    
-384   160    
96     320    
-96    0      
-176   192    
256    128    
-144   -16    
-16    112    
-112   80     
752    240    
64     112    
0      128    
-144   240    
2368   4560   
-2288  912    
496    -576   
1296   -48    
-544   -112   
-368   0      
-224   -16    
976    16     
-176   -16    
112    304    
368    16     
-448   96     
400    160    
0      -160   
-160   112    
-96    208    
176    80     
16     144    
0      -16    
224    1520   
432    1360   
-528   -304   
240    -208   
-16    160    
-544   -80    
736    256    
-352   144    
-128   -32    
192    80     
-64    -448   
176    -48    
-256   -144   
16     208    
-224   -48    
160    -48    
416    -96    
-464   -400   
480    672    
-224   432    
0      96     
208    16     
-176   -352   
304    -656   
-128   112    
-96    496    
336    336    
-384   256    
304    336    
-48    -336   
-192   -336   
368    -96    
-512   -592   
544    -432   
-288   576    
400    320    
64     464    
-112   656    
640    2080   
672    1296   
32     1072   
320    1216   
-48    848    
80     384    
16     -176   
96     0      
32     320    
32     -576   
128    16     
80     -864   
-64    112    
48     -288   
-128   -320   
16     368    
16     -96    
-304   304    
272    144    
-352   -192   
352    240    
256    -320   
-224   -144   
-48    96     
-48    -720   
432    -1200  
144    -256   
-32    512    
-176   336    
-96    128    
464    432    
-272   1104   
128    240    
160    48     
-80    192    
144    224    
-64    192    
192    16     
-352   416    
-16    -224   
448    -368   
-144   -752   
-96    -128   
-32    -2784  
224    512    
64     224    
16     -16    
784    16     
-640   352    
272    288    
-48    400    
144    16     
144    -160   
-128   -48    
-32    -64    
256    288    
0      -432   
144    -144   
-160   -224   
-80    256    
-144   176    
368    112    
208    480    
-224   416    
-128   0      
544    -240   
128    32     
-48    -160   
256    144    
-256   -416   
-48    144    
336    -160   
-16    208    
-176   -400   
1072   -368   
-3088  -224   
624    576    
224    -192   
-576   -464   
0      224    
-96    -608   
-592   -576   
704    128    
304    400    
240    800    
-576   -208   
144    -64    
64     64     
320    144    
-160   16     
-16    256    
-384   -544   
144    -96    
192    -32    
-176   -560   
976    992    
112    80     
-992   -816   
576    -784   
-512   -272   
320    672    
544    -1472  
-480   -1920  
-16    -1056  
48     832    
32     144    
144    -592   
-96    -224   
-16    -1520  
-192   -1056  
16     48     
192    -1008  
-480   720    
336    -1152  
112    -240   
128    176    
-16    -368   
224    848    
304    32     
-480   -176   
496    -176   
-144   992    
1120   16     
-848   -64    
-32    -400   
464    96     
-176   128    
400    -144   
368    752    
-896   -16    
160    -544   
256    608    
224    -16    
320    800    
-768   496    
208    -96    
656    -16    
-576   176    
-208   128    
-544   -656   
144    -96    
272    -16    
-960   -80    
336    -416   
1696   2928   
-1408  496    
304    -176   
2064   224    
-720   1680   
-160   -288   
-128   0      
144    -560   
368    -640   
-208   -240   
96     -112   
-288   128    
112    -304   
224    -352   
-240   -32    
112    -64    
96     -416   
-336   -128   
576    368    
-256   992    
48     -576   
176    -464   
48     -176   
-608   208    
-32    -16    
384    -208   
-144   304    
-144   256    
80     240    
-112   -144   
272    128    
-48    -160   
32     -176   
-208   -624   
-288   0      
80     -160   
384    -160   
-176   -240   
-320   -128   
32     -32    
48     -112   
352    16     
-352   -32    
-464   48     
96     -208   
-320   -80    
496    -352   
384    320    
-464   176    
128    224    
160    -1408  
304    928    
-464   160    
-224   -272   
576    160    
0      -144   
-480   96     
320    -32    
-144   -64    
352    128    
144    -80    
-224   -176   
96     208    
-32    -528   
32     -32    
384    -2576  
-624   96     
144    48     
240    400    
-176   -32    
64     32     
-448   144    
368    -336   
-208   -208   
48     48     
32     128    
64     -272   
336    -176   
-144   -16    
-16    144    
176    -720   
-768   -1856  
912    112    
192    -160   
-1056  48     
928    -16    
-112   -144   
-352   -240   
-400   144    
752    160    
-160   80     
64     -256   
-304   224    
32     -176   
256    -208   
-144   416    
32     -288   
-16    -16    
-208   208    
-32    -48    
144    -64    
560    1360   
-1536  -16    
208    -80    
1104   -304   
-672   -80    
240    -128   
-576   384    
-384   -208   
-16    32     
464    144    
-768   80     
-256   -96    
-592   128    
624    -208   
-128   96     
-112   128    
80     192    
32     96     
-1088  -240   
-256   208    
-16    -80    
16     160    
-16    -80    
-592   -64    
272    80     
-640   16     
304    160    
-256   112    
32     32     
-416   -1248  
592    3840   
2592   768    
-1920  64     
-112   -496   
-160   176    
528    -48    
144    -64    
-128   -352   
208    0      
-656   192    
272    0      
288    80     
64     16     
-512   128    
240    48     
-224   48     
112    -48    
112    144    
0      -80    
208    48     
-64    -176   
-384   -656   
-112   528    
448    -672   
144    336    
-320   304    
544    112    
-496   224    
-336   -144   
304    240    
48     -48    
32     64     
80     128    
-224   -32    
-32    64     
432    -208   
32     192    
-96    384    
-80    320    
192    128    
112    -80    
-176   -240   
384    160    
112    -208   
-96    128    
384    256    
-1056  -32    
368    80     
272    224    
-640   240    
176    -240   
-48    -16    
544    144    
-16    64     
-288   -752   
-176   160    
208    64     
-528   -208   
400    160    
-208   32     
-176   -64    
48     -32    
-16    80     
-400   32     
192    160    
-32    176    
544    -16    
-320   160    
144    144    
224    688    
368    -416   
-2256  -320   
1552   -160   
464    -64    
-560   128    
-320   1232   
64     128    
208    112    
-48    -32    
96     48     
160    -112   
-352   -32    
672    -320   
-368   288    
240    16     
-256   384    
464    -16    
-352   128    
560    304    
-112   256    
-16    -624   
-128   -368   
224    192    
-736   -32    
64     400    
192    32     
-240   -144   
272    -352   
-240   -160   
224    160    
-32    832    
112    800    
48     224    
-96    -64    
64     -224   
-192   32     
224    416    
112    384    
-336   96     
112    176    
96     -288   
-448   -240   
144    -160   
256    80     
288    -416   
-192   -656   
-224   -256   
-240   -544   
-624   -752   
528    304    
-96    416    
-496   -592   
496    -592   
-720   624    
960    48     
112    544    
-640   576    
-48    -1200  
-224   -80    
544    1744   
-448   -304   
160    144    
96     352    
-192   16     
304    -192   
160    368    
-208   16     
-16    16     
48     112    
-208   -112   
64     112    
-64    96     
-208   128    
144    128    
16     112    
96     160    
-128   -80    
-560   -80    
416    352    
-32    224    
0      16     
-256   128    
-128   976    
752    -96    
-560   -160   
32     144    
-112   80     
-176   160    
-144   368    
336    -176   
-464   -320   
192    128    
-64    64     
192    64     
64     -48    
-240   160    
-192   -32    
352    -192   
128    -80    
-48    64     
-128   224    
-96    256    
496    -96    
-176   64     
832    16     
-816   272    
160    176    
112    -208   
-368   -416   
400    -144   
16     352    
32     -96    
-240   48     
256    144    
192    64     
96     192    
0      128    
-176   96     
-96    -32    
256    480    
-64    112    
-64    -176   
80     288    
224    208    
-144   -208   
80     96     
-16    128    
192    -1760  
224    96     
160    0      
-528   176    
1360   1280   
-1232  1184   
-672   288    
1328   -272   
-736   -176   
-16    -496   
544    880    
272    768    
-16    -1456  
320    80     
-320   96     
-16    32     
352    32     
-64    128    
-80    240    
-48    16     
288    0      
-176   -32    
-48    -512   
16     64     
-48    144    
-400   384    
2656   -192   
-1824  400    
656    -1040  
-512   144    
112    144    
-112   1136   
560    -1328  
-224   -592   
272    -784   
144    -240   
16     320    
128    96     
-416   64     
800    224    
0      80     
16     528    
-176   336    
-448   -272   
352    32     
112    -112   
320    448    
-288   -1888  
1584   -2128  
-208   -624   
-592   464    
832    576    
-320   -304   
-96    0      
624    320    
-16    160    
-256   -80    
0      -368   
48     96     
464    912    
784    -176   
-496   -432   
640    -480   
64     512    
64     -464   
-208   288    
544    -80    
16     256    
-208   224    
-112   -672   
-128   256    
352    144    
-464   144    
-432   -656   
-80    -2016  
1840   -1936  
160    288    
-256   -704   
-544   320    
-160   -256   
496    384    
192    320    
-880   336    
304    16     
64     128    
64     112    
-128   -112   
-32    224    
128    -176   
400    224    
-240   -704   
176    256    
-288   -352   
608    1152   
176    -176   
-432   128    
320    -32    
-368   32     
-16    80     
464    112    
-224   192    
-16    0      
64     192    
256    -832   
-528   64     
464    -128   
-336   80     
-80    -144   
384    -32    
-112   -416   
-48    -64    
272    368    
16     480    
176    160    
-80    -48    
256    -16    
160    -480   
-112   256    
112    -160   
-64    112    
320    128    
48     160    
-192   -96    
256    64     
-208   -336   
96     144    
-96    720    
1184   -128   
-752   64     
112    -1200  
336    -448   
208    -320   
-272   -368   
0      -320   
-288   -496   
496    -32    
-240   128    
112    -144   
112    80     
-32    64     
64     144    
-48    480    
80     -288   
352    384    
144    -208   
-256   -128   
48     160    
112    -496   
-32    -16    
96     -1120  
80     288    
32     -1840  
80     -224   
32     304    
-80    -96    
1136   2496   
-2688  240    
528    -288   
1040   128    
-480   -320   
-160   96     
-48    -112   
304    256    
-352   -256   
288    -384   
16     352    
-336   -992   
224    96     
304    224    
-544   176    
400    -192   
-384   224    
48     -592   
96     -224   
0      384    
-304   -528   
-368   -1168  
-80    80     
688    -192   
-576   96     
-176   -96    
352    -640   
0      320    
368    -16    
-112   16     
-112   -128   
-96    -16    
544    -80    
-80    128    
-128   -176   
-240   -32    
304    64     
400    16     
-400   64     
0      -80    
80     -16    
208    -368   
-48    32     
256    -1136  
-144   336    
64     -32    
-224   208    
416    -224   
-224   64     
0      48     
-1200  -1856  
-160   96     
288    -144   
-1152  112    
128    -48    
1136   -16    
-576   -368   
-80    -752   
-336   -1200  
48     -208   
192    -32    
128    16     
0      -16    
-224   -528   
352    -16    
-448   -112   
304    80     
-144   352    
-48    368    
-368   208    
144    16     
272    -544   
-1200  880    
1360   -32    
-416   528    
432    -1520  
80     -192   
-560   352    
-16    -192   
-80    16     
208    -48    
-128   0      
-224   -32    
-240   0      
432    -192   
-496   128    
304    -144   
-128   48     
224    240    
-240   304    
16     -784   
112    -80    
-304   -80    
592    -272   
48     80     
96     -624   
-704   304    
352    48     
-80    -80    
-208   -64    
-144   192    
496    -752   
176    -560   
-704   -224   
624    352    
-192   -704   
-240   160    
0      256    
-112   48     
160    -128   
-48    0      
-256   64     
48     64     
144    16     
48     16     
416    304    
-2000  112    
128    64     
-176   -112   
-192   -784   
-480   -176   
336    -1920  
64     592    
-896   -368   
-1056  224    
112    -400   
-224   -848   
512    -16    
400    32     
-800   -272   
96     48     
48     -432   
112    240    
-64    160    
-592   32     
224    -400   
16     240    
304    -160   
-416   144    
112    304    
-464   448    
16     48     
144    -96    
-592   -720   
-176   -960   
32     -32    
112    -128   
-144   736    
-304   848    
0      704    
96     64     
48     0      
-96    -128   
-112   160    
-64    -800   
-80    -384   
48     -224   
-64    -752   
-80    -480   
112    544    
-80    128    
112    -432   
-144   128    
-96    0      
-208   32     
320    -800   
-288   -1152  
112    752    
352    848    
-144   320    
-240   -144   
-288   -352   
528    -208   
-528   -144   
176    416    
336    256    
-208   -32    
-64    -832   
480    -640   
80     1280   
-224   576    
-352   -112   
48     112    
48     144    
-128   128    
-144   -80    
64     0      
-32    -464   
-160   -208   
-96    112    
-16    80     
0      -144   
144    272    
16     -16    
48     0      
160    320    
-528   352    
-32    368    
528    64     
-336   16     
-208   160    
-64    32     
128    400    
256    272    
-272   -240   
-48    368    
64     128    
80     80     
32     640    
-64    368    
-256   -304   
224    -32    
-112   128    
-64    96     
256    144    
-256   96     
-80    0      
144    -112   
128    -48    
-96    -96    
16     160    
192    512    
-528   112    
208    -256   
688    -192   
-448   96     
96     368    
-96    464    
64     -144   
80     -352   
-96    144    
0      80     
32     -80    
112    208    
-304   336    
32     144    
96     -16    
-224   48     
-112   608    
640    672    
-192   32     
-464   -224   
80     -48    
240    32     
16     128    
80     16     
-208   160    
-432   -176   
624    -64    
416    -352   
-784   272    
224    -640   
-2016  -784   
720    -672   
-256   -144   
-576   192    
320    304    
16     1104   
-736   944    
464    544    
96     -176   
-192   0      
-64    -64    
144    128    
80     -96    
-64    -80    
-96    192    
128    192    
-128   512    
336    352    
-144   384    
-96    128    
0      1088   
1872   32     
-960   -32    
160    -576   
-208   -80    
48     144    
112    320    
96     0      
208    592    
-496   96     
-176   48     
464    64     
128    32     
-112   192    
-512   128    
336    0      
224    64     
-304   112    
-192   32     
192    64     
112    48     
176    16     
-1104  432    
784    -16    
-160   864    
-384   0      
80     688    
-320   320    
-176   -64    
272    -208   
-304   32     
448    352    
-80    320    
-304   -240   
624    272    
-112   64     
592    -176   
-304   48     
80     80     
-176   48     
192    48     
256    16     
-48    192    
64     80     
-240   128    
112    16     
-16    224    
-224   32     
-272   384    
960    304    
-944   -352   
-32    160    
1936   80     
-624   320    
-752   -64    
400    112    
608    96     
-208   240    
-240   -240   
64     160    
656    80     
-80    48     
144    16     
-224   32     
400    0      
64     256    
208    -928   
-96    400    
272    -560   
-448   144    
864    48     
-336   368    
-944   -224   
368    272    
624    80     
-288   192    
-448   -160   
304    192    
32     -272   
-240   -64    
320    -32    
-336   -336   
512    192    
-48    352    
-416   96     
96     192    
400    144    
-240   -48    
384    208    
-320   -112   
224    48     
160    -368   
-112   144    
48     -48    
80     -16    
448    128    
-320   -240   
-80    80     
128    -16    
-128   -48    
208    -32    
0      368    
752    -16    
32     944    
480    80     
-112   192    
400    288    
352    240    
-336   -32    
-128   16     
288    16     
-80    -240   
-48    16     
32     -624   
192    96     
-80    288    
48     160    
208    208    
80     48     
-96    -32    
-48    112    
96     288    
-96    208    
208    160    
0      -592   
192    912    
-576   640    
352    -288   
240    -208   
-144   384    
560    -512   
-2224  1536   
1456   -96    
-64    96     
-192   -80    
224    -144   
-272   272    
384    144    
-544   432    
448    -48    
-320   -144   
48     80     
128    160    
240    -176   
-544   336    
240    -992   
128    160    
-64    -272   
112    -208   
-32    192    
-416   16     
944    288    
-320   -96    
-288   -16    
96     -128   
-224   192    
304    128    
160    -80    
0      -800   
-320   176    
416    144    
160    160    
-112   288    
0      64     
0      208    
160    336    
0      64     
-96    -240   
64     160    
-144   -464   
80     80     
16     -208   
144    160    
160    -160   
-368   16     
496    48     
-208   0      
-32    176    
224    176    
16     176    
800    -1216  
-2448  384    
1904   544    
-464   -992   
-400   32     
1360   -224   
-816   -576   
-80    -160   
368    160    
96     240    
-160   -16    
-80    -1248  
352    112    
-96    -672   
32     176    
416    32     
-96    16     
112    400    
256    -688   
-128   -48    
32     144    
720    928    
-1872  352    
128    -112   
368    -416   
448    560    
-384   -112   
-16    -32    
64     -176   
-64    -48    
-576   -160   
-160   -464   
112    -112   
32     -32    
-80    -272   
-64    -576   
80     -96    
-48    -384   
96     -304   
80     -352   
-384   192    
48     0      
-128   80     
-208   -320   
192    16     
-128   -640   
-192   -16    
480    528    
560    -112   
-352   -176   
0      256    
544    -304   
-448   -16    
240    16     
352    400    
480    -544   
-368   416    
48     400    
-224   -160   
560    32     
-128   48     
-240   -48    
-192   64     
160    -64    
112    -240   
-144   -48    
64     -608   
-144   48     
848    16     
-128   -256   
-224   320    
-656   2128   
288    304    
-416   224    
-240   -416   
768    -80    
272    480    
-976   -272   
-96    -1824  
48     432    
-112   -224   
-80    240    
-288   -48    
144    -608   
368    -720   
-112   -720   
-160   -736   
80     896    
208    -304   
-48    -80    
-304   -464   
-64    64     
-256   -64    
208    -288   
-48    -720   
-144   -832   
16     -416   
208    -528   
0      -160   
272    -320   
-288   -304   
64     304    
-32    -256   
-48    16     
272    -144   
-224   48     
-96    208    
128    -528   
-528   -1376  
-32    0      
80     432    
192    352    
-96    -576   
-48    208    
96     -128   
-176   -48    
320    -1488  
192    192    
-96    432    
-128   128    
80     -368   
-96    80     
-288   704    
944    320    
-560   400    
144    864    
112    960    
208    -640   
-240   768    
176    -1312  
-320   -16    
-176   400    
176    496    
144    32     
80     -112   
-624   496    
224    0      
0      352    
416    -528   
-128   128    
-64    224    
320    64     
112    -176   
80     -80    
80     -128   
-80    32     
32     -304   
-608   -528   
-64    -208   
288    -112   
256    -160   
-352   96     
-736   496    
1152   -464   
-656   608    
224    16     
-320   -160   
-1008  -464   
-256   0      
-416   -288   
-368   -240   
-304   -16    
48     208    
208    112    
-1248  -160   
-192   -96    
16     48     
-48    -96    
240    -272   
-112   -16    
-816   -368   
-208   -256   
256    -672   
192    256    
-208   -16    
-256   608    
-16    -16    
-16    544    
192    -368   
-352   -672   
-160   -288   
-160   784    
48     64     
64     -848   
128    -256   
-128   464    
-112   -176   
144    432    
256    -304   
-352   -144   
-80    64     
400    240    
-192   -128   
-240   336    
144    -96    
-240   -192   
-80    -176   
32     32     
-896   -48    
-64    96     
144    -288   
112    544    
48     752    
-512   1024   
832    80     
-928   -800   
-848   544    
1520   208    
-960   352    
144    96     
-320   -256   
48     -144   
-256   64     
-736   0      
0      112    
112    0      
-352   48     
256    -176   
-80    320    
0      464    
96     464    
80     -32    
-128   240    
416    -736   
-1328  656    
960    176    
-224   64     
-736   160    
384    -224   
272    144    
112    -208   
-64    16     
-176   0      
-112   48     
208    80     
144    176    
-64    -32    
-320   96     
384    336    
-352   -48    
368    -304   
-144   -48    
-128   288    
-336   -384   
1008   112    
-496   240    
272    -112   
176    -416   
-160   -64    
336    576    
-416   272    
160    -48    
-368   16     
-176   176    
16     144    
144    64     
16     -224   
192    192    
-464   -80    
272    0      
240    -192   
96     208    
-528   16     
112    0      
192    0      
96     -176   
-224   32     
400    -160   
-704   352    
1056   -144   
-128   128    
-1584  -1488  
1888   208    
-208   -352   
-416   -672   
944    688    
-1104  -496   
128    208    
592    144    
192    224    
-272   -224   
272    192    
176    -48    
112    144    
224    -80    
-320   64     
304    -64    
16     144    
224    96     
160    112    
48     368    
-1232  80     
976    288    
-208   -48    
224    96     
560    208    
-1200  -144   
384    224    
320    -112   
-384   16     
160    -176   
-256   272    
272    48     
-288   112    
400    48     
-432   112    
864    112    
-512   144    
80     240    
16     240    
224    -64    
48     -16    
-128   48     
320    176    
-112   176    
224    176    
0      48     
-272   -16    
48     -112   
560    -112   
-112   64     
144    304    
-384   160    
384    432    
-928   288    
480    96     
-208   80     
-384   -96    
320    96     
-80    -16    
256    144    
-352   160    
224    128    
-80    64     
-80    144    
224    96     
-240   352    
-112   112    
352    304    
-96    -160   
-176   160    
336    272    
128    96     
-48    48     
-48    112    
16     96     
16     -64    
-176   160    
-64    224    
128    64     
0      -256   
-144   304    
-432   -768   
512    -2224  
-864   832    
1456   48     
-1040  176    
-256   -16    
560    64     
128    112    
208    -176   
-640   688    
304    16     
64     -48    
256    224    
-112   112    
-112   464    
176    48     
112    -16    
160    352    
-224   48     
-16    128    
32     112    
16     -1184  
-48    368    
176    -224   
-512   -80    
352    -448   
240    -160   
-128   -1616  
-416   288    
80     352    
496    160    
32     -96    
-272   48     
-128   64     
0      112    
304    272    
144    288    
48     -48    
-368   256    
96     -80    
128    -320   
-48    -112   
448    -560   
-336   176    
240    272    
-144   464    
0      256    
0      48     
224    64     
256    224    
-1056  -64    
1552   -1216  
-368   320    
240    240    
-304   528    
-144   -32    
464    80     
-96    352    
-64    416    
320    176    
-384   176    
144    128    
16     80     
32     -64    
240    16     
112    0      
-32    256    
192    432    
96     608    
32     304    
64     -96    
560    896    
-1904  -736   
128    192    
944    -768   
-1056  -128   
976    1136   
-944   512    
-288   -1008  
512    -304   
-160   64     
464    16     
-544   64     
-96    -176   
320    16     
64     160    
208    224    
-128   -240   
-208   -128   
48     -640   
80     112    
-16    -1200  
-64    208    
304    624    
-336   640    
-608   576    
720    176    
-208   -576   
-32    304    
624    160    
-16    -304   
-96    128    
-112   384    
272    400    
-224   -736   
736    464    
560    416    
272    -64    
448    -496   
-80    48     
80     -112   
-48    32     
80     -48    
-240   -16    
224    176    
112    -752   
160    336    
640    -16    
48     -208   
-96    -784   
368    48     
848    -112   
-2480  144    
32     -640   
896    1008   
1008   896    
-800   -144   
-656   -1856  
144    -1008  
368    816    
240    -976   
32     512    
-416   -48    
-80    416    
368    -80    
176    528    
-384   -32    
-144   -48    
176    -336   
256    -272   
16     -784   
-512   -784   
64     -192   
480    336    
240    -1472  
-752   128    
352    576    
-192   -608   
320    -1520  
192    640    
32     576    
-112   400    
-80    -1008  
112    48     
96     128    
-256   800    
-432   -624   
528    -704   
-96    112    
32     -1408  
64     176    
-32    272    
240    -416   
-128   400    
128    368    
-32    16     
176    -784   
416    304    
-400   528    
80     -96    
-272   -128   
176    176    
-112   1072   
992    336    
-352   192    
144    176    
304    176    
-80    -16    
384    1248   
-32    -832   
-272   -1824  
64     112    
64     256    
0      -32    
-96    -112   
128    -464   
176    -592   
80     -240   
32     -32    
-64    96     
-80    -448   
176    -368   
304    432    
-32    -1840  
-48    144    
-144   -128   
-48    -48    
592    560    
176    1120   
-240   -256   
-416   -208   
-496   -720   
928    -1744  
-320   288    
96     144    
496    1072   
512    -656   
-288   -608   
416    -512   
-608   -240   
96     -1776  
160    -80    
208    -144   
-64    384    
-224   -112   
272    272    
400    -240   
-80    400    
-240   160    
64     -128   
160    -112   
-256   -512   
224    -848   
48     48     
32     -752   
-160   -464   
352    160    
-176   -256   
96     -192   
240    224    
-176   32     
64     64     
240    -80    
48     176    
-48    336    
-352   -96    
-112   -528   
528    -832   
-80    -288   
-64    272    
-112   -560   
224    16     
32     -80    
-240   64     
0      32     
272    0      
-16    -64    
-320   16     
0      -16    
80     -16    
112    -128   
880    -384   
-1936  32     
656    -320   
448    -320   
-736   -464   
32     288    
336    -32    
-208   464    
160    208    
384    32     
-432   -64    
32     112    
48     -16    
176    64     
-224   -16    
-224   80     
-96    -128   
-64    144    
464    48     
-144   64     
32     32     
-112   272    
560    -816   
-992   208    
864    -288   
-128   224    
224    112    
-256   -64    
336    -144   
-192   96     
0      -128   
288    112    
-240   -64    
-96    128    
-272   -320   
192    -16    
-448   48     
48     -48    
-464   416    
256    -80    
-320   -192   
688    0      
-592   -688   
-1008  80     
1440   272    
848    -48    
-592   -80    
-1152  -80    
80     592    
-256   -224   
496    16     
336    32     
-400   16     
-128   32     
-208   -208   
-128   -512   
272    64     
-144   48     
-16    80     
448    -80    
192    240    
-544   160    
-464   272    
928    80     
96     -112   
240    960    
-1184  144    
96     -480   
-64    96     
-480   -32    
-432   3104   
1744   0      
-496   1040   
0      -80    
-560   0      
560    208    
-240   192    
368    -96    
96     368    
-144   -224   
-400   112    
320    96     
-368   -32    
256    -32    
-208   48     
112    64     
-944   -64    
464    128    
-1024  -304   
-624   -240   
528    0      
-416   32     
96     256    
144    -48    
-608   48     
832    48     
-688   144    
32     128    
192    160    
432    160    
-464   224    
352    224    
-368   16     
-16    -176   
256    -16    
-96    48     
-208   256    
368    80     
-432   -96    
-192   192    
48     96     
-96    0      
240    96     
-352   -144   
128    -240   
128    -48    
-96    64     
64     224    
-64    320    
16     384    
-128   336    
-16    160    
-320   -112   
416    -96    
-432   -128   
-48    -96    
-32    304    
-16    -96    
64     -96    
0      96     
-560   448    
240    112    
80     32     
-288   -320   
32     -128   
-608   -272   
-192   208    
352    320    
-320   352    
288    352    
208    144    
-96    144    
-48    112    
-128   -80    
96     -16    
80     -224   
-32    -112   
-48    128    
-160   432    
416    448    
-672   32     
160    1328   
-1040  -1728  
-496   528    
2032   176    
-368   640    
-1072  816    
416    912    
800    256    
-400   352    
-240   -48    
-112   224    
336    192    
-64    16     
-48    -176   
-608   -560   
272    480    
-240   736    
32     144    
-96    320    
64     112    
-32    -64    
-368   736    
624    -336   
-976   992    
720    144    
-320   96     
384    48     
-496   -416   
480    640    
-208   16     
-192   0      
192    48     
-80    -176   
64     64     
48     464    
16     144    
-368   -32    
144    144    
-160   -32    
112    432    
16     -48    
16     -80    
-224   144    
-128   336    
64     272    
-80    -64    
176    16     
160    144    
-128   80     
-48    -16    
-416   -224   
1536   -384   
432    784    
-1168  16     
880    640    
-96    -176   
-176   -304   
416    -656   
160    -928   
-368   736    
176    944    
144    -160   
224    -64    
-128   -96    
-32    240    
64     128    
80     96     
160    48     
-304   -64    
16     64     
96     112    
512    -560   
-2608  240    
1312   576    
368    1088   
-992   640    
864    144    
272    -432   
-400   -224   
16     0      
352    -16    
-144   416    
-48    208    
-144   272    
352    48     
-96    -112   
16     128    
32     256    
-384   480    
656    -784   
-48    -832   
-480   -528   
-32    -272   
96     208    
-608   -224   
1168   1376   
-400   1680   
-816   -480   
800    -96    
-32    448    
-240   -288   
160    -480   
464    416    
208    0      
-560   208    
384    336    
-688   16     
416    688    
256    -1104  
-896   -944   
352    -336   
-336   -128   
192    -192   
-64    -560   
-416   -208   
16     -16    
-16    -896   
160    -112   
-112   -1040  
-80    -208   
400    208    
1040   416    
-2640  -160   
656    864    
1600   496    
-416   832    
-128   1088   
-272   896    
48     32     
576    784    
112    -176   
-192   224    
-352   -416   
112    -448   
336    0      
-464   -224   
-208   144    
240    272    
-112   272    
-64    -96    
-64    -720   
-96    -288   
32     352    
-16    -144   
1024   -320   
-1008  368    
688    112    
-64    272    
80     -896   
-48    -1664  
160    -448   
48     448    
-240   64     
160    528    
160    192    
128    112    
-176   -448   
288    416    
240    976    
112    800    
544    976    
-320   544    
-16    272    
208    -816   
-304   -256   
416    -128   
-512   368    
464    -288   
288    464    
-160   -496   
-48    -400   
-288   32     
0      480    
928    96     
128    1472   
-1728  0      
80     80     
0      544    
-208   -1328  
192    304    
-128   512    
176    944    
0      -32    
240    400    
48     560    
-368   352    
96     -512   
48     -80    
-240   -176   
64     -256   
272    144    
-592   -160   
240    32     
160    -288   
128    192    
-208   -768   
48     -112   
16     -2704  
-128   -464   
48     256    
0      320    
192    80     
208    1728   
1008   -560   
-976   -192   
464    320    
-160   -608   
224    -1024  
-240   -1136  
-48    -1072  
-96    -192   
400    416    
-112   192    
48     416    
-48    -352   
-16    -272   
288    32     
-192   416    
-16    -64    
208    -240   
-16    16     
64     -48    
-272   -16    
736    -704   
-576   192    
176    64     
384    208    
-208   144    
256    0      
-192   -112   
336    -720   
-304   96     
512    -16    
-128   -1536  
-64    -272   
-128   -1200  
320    -128   
112    112    
-192   -224   
-16    -112   
-128   160    
400    -64    
-288   208    
240    -176   
-240   -48    
320    -752   
-128   400    
-144   48     
-112   144    
48     -144   
0      -112   
-560   -544   
1824   -1008  
-2368  448    
480    176    
800    -16    
-96    -288   
-240   -48    
-368   -752   
528    192    
-208   -304   
0      48     
-560   16     
112    -176   
96     -160   
128    32     
-336   -112   
336    -240   
-96    -112   
-80    -2416  
128    -48    
48     -48    
-16    -480   
1376   672    
-400   256    
-336   -320   
-288   80     
-48    -624   
-640   -640   
288    -272   
576    -48    
-32    0      
-448   -384   
-432   -112   
528    -1712  
160    -80    
0      32     
80     16     
-128   272    
16     0      
-368   -144   
848    -160   
-224   -96    
-192   -288   
-1376  80     
752    -16    
-192   -336   
816    -240   
-256   -16    
-80    -656   
544    400    
-320   176    
592    352    
-416   336    
-272   320    
416    -96    
160    -256   
-432   -240   
-512   -256   
128    224    
320    -320   
592    -256   
-288   -192   
256    -32    
-128   -160   
16     160    
144    -1200  
48     -176   
160    32     
240    -64    
-400   0      
-464   -1712  
656    -320   
928    -416   
-2688  640    
1200   112    
-448   -464   
-656   -80    
768    528    
0      -368   
-176   304    
16     -944   
-176   80     
320    -64    
-64    16     
96     32     
-112   -144   
-208   48     
48     48     
-336   -16    
176    -336   
-752   -464   
432    -64    
-208   -144   
592    -288   
352    -48    
-336   -64    
-224   272    
416    160    
0      -160   
-48    -112   
-400   -256   
192    64     
96     368    
-144   272    
96     224    
336    -192   
-96    -80    
-224   144    
80     128    
256    288    
-80    -16    
-208   160    
-336   0      
-96    -176   
48     -112   
256    -160   
-224   -64    
176    -208   
-176   -128   
16     -288   
-32    -240   
-64    -192   
-16    -96    
560    -176   
-240   736    
-880   -432   
-416   -720   
224    -608   
-176   0      
-176   -48    
144    160    
-48    32     
-256   -1120  
-240   -576   
208    -576   
-448   -624   
-192   -368   
-80    -208   
-464   -128   
16     -240   
16     -272   
-128   -48    
80     128    
-192   -80    
48     -160   
-496   -240   
-48    -272   
-64    -496   
-32    656    
-144   608    
-16    144    
-224   -720   
1120   -80    
-720   176    
-48    -592   
-272   -704   
-192   672    
304    0      
0      560    
48     -48    
-416   -288   
-16    -224   
-416   160    
80     -128   
-144   16     
-80    -16    
-144   -304   
-32    256    
-64    -880   
64     304    
0      -160   
-128   48     
-464   464    
944    16     
-704   -368   
0      -560   
464    -240   
-176   -224   
160    -608   
-112   -688   
-144   -240   
-32    0      
96     -16    
384    -336   
48     256    
-208   144    
-128   -96    
144    240    
48     192    
32     32     
-320   112    
288    -64    
64     -128   
96     0      
-528   -176   
-96    464    
96     176    
144    16     
-64    -544   
-64    -208   
176    224    
-624   -544   
1936   -880   
112    1040   
-704   -48    
1008   -704   
-288   -16    
-80    -256   
608    352    
-912   -1024  
-32    192    
224    880    
-16    224    
-96    -336   
128    0      
-176   192    
144    160    
0      80     
96     288    
-480   160    
-48    -304   
320    176    
-320   -848   
-592   928    
912    -848   
-848   -144   
1104   688    
-416   1040   
576    1648   
-272   1936   
432    640    
-64    -1056  
-256   -320   
176    -272   
-304   -208   
-64    -352   
576    -144   
-912   -176   
256    -1024  
-224   -1568  
32     -912   
-880   144    
-64    304    
0      480    
0      0      
-304   992    
768    560    
-48    304    
-992   -768   
64     0      
80     -1024  
-336   -96    
112    -176   
80     352    
-352   -64    
16     -144   
128    544    
208    688    
-48    240    
128    -816   
-368   -336   
-16    -224   
-288   144    
128    -64    
-208   -336   
64     -352   
272    480    
-832   64     
208    224    
48     800    
480    480    
-464   144    
272    1456   
1024   64     
-1328  64     
-304   -240   
1232   -224   
-48    -304   
48     -16    
-320   416    
-96    -272   
416    640    
-96    96     
-48    -288   
-224   -656   
32     320    
240    288    
-176   464    
-400   -16    
80     288    
480    416    
-96    -224   
-128   -144   
0      -144   
-480   240    
-432   160    
1184   224    
-1024  400    
192    -112   
-96    -80    
544    304    
-192   336    
-128   320    
352    32     
-192   240    
-144   48     
-224   -80    
320    -192   
176    80     
-176   192    
32     48     
-16    512    
624    416    
-192   304    
-288   224    
-80    320    
144    368    
32     16     
16     576    
512    224    
-80    112    
-224   -144   
128    32     
272    -320   
-1152  16     
-16    -64    
704    16     
-256   64     
176    112    
-144   832    
464    256    
96     -16    
256    48     
32     336    
-496   -48    
-16    0      
416    80     
-64    -96    
-304   224    
288    240    
-32    -208   
-16    32     
-112   64     
96     -144   
-176   -112   
208    144    
32     48     
128    224    
0      144    
-240   -48    
192    128    
128    96     
1168   1344   
-2800  1136   
1104   -64    
400    -320   
-144   32     
-32    -336   
-176   -128   
192    48     
48     -832   
96     464    
-128   -48    
-224   272    
352    192    
0      336    
-96    -32    
272    352    
-576   16     
224    0      
288    128    
-144   16     
-416   -352   
528    -1520  
-544   608    
912    -704   
-192   96     
-496   80     
400    -368   
0      528    
560    160    
-848   320    
96     -48    
112    128    
144    -16    
112    -112   
-16    0      
-368   336    
128    -320   
128    144    
-128   -464   
80     96     
48     96     
-288   112    
144    96     
16     80     
0      448    
496    128    
-320   0      
400    -16    
-304   0      
176    -32    
-208   1472   
240    288    
128    240    
-224   -720   
-816   -272   
384    -192   
1040   0      
-784   320    
416    64     
-192   32     
352    128    
16     -16    
-48    112    
-80    -176   
-112   -32    
288    80     
-224   -96    
144    32     
256    -208   
-160   32     
-112   -368   
-464   -464   
768    -624   
-656   16     
-112   288    
1376   480    
-1072  128    
112    48     
144    320    
448    -272   
0      96     
112    -64    
112    112    
-32    -64    
128    16     
-208   -96    
288    112    
-64    -1056  
-32    336    
144    -80    
80     16     
16     -128   
576    480    
176    -448   
-80    -32    
1008   112    
-320   240    
-496   32     
-1024  0      
704    128    
176    -80    
-16    -80    
64     -128   
48     144    
-144   -560   
160    -176   
64     192    
-272   -960   
640    -64    
80     -208   
208    16     
144    48     
-192   160    
160    -240   
128    192    
-112   -752   
16     112    
-128   -288   
32     -160   
336    496    
-288   -5360  
-2032  -400   
1168   -368   
384    -48    
464    192    
-976   -560   
-224   -176   
816    -192   
0      -336   
336    32     
-16    -192   
-160   -720   
80     80     
48     -384   
48     -48    
160    -1504  
-64    -416   
-160   -128   
-192   -384   
448    -1136  
-224   -1760  
192    -800   
80     -592   
-592   0      
-256   -112   
832    -784   
-48    48     
96     208    
-336   64     
80     0      
128    -192   
64     -32    
-192   96     
-176   -208   
160    208    
-176   -1136  
144    -576   
-144   -496   
80     -336   
304    -1600  
-272   -272   
224    -336   
-112   -208   
16     -112   
48     -176   
-288   48     
480    -64    
-448   -352   
-320   -368   
64     -464   
352    192    
208    816    
-208   32     
-704   -16    
352    0      
368    -112   
-576   -192   
-64    -528   
-208   -752   
192    -576   
-16    784    
96     448    
-48    -144   
-112   176    
-96    -80    
-32    -512   
80     144    
-304   0      
-96    -384   
128    -784   
128    -208   
-32    272    
-32    32     
-128   48     
112    -16    
-96    112    
-32    192    
-176   608    
16     816    
-608   160    
224    -320   
0      -320   
448    -1264  
-320   112    
416    -336   
288    128    
-96    -1824  
-80    176    
48     32     
-80    112    
-16    336    
-80    64     
-64    -176   
192    -48    
-208   -240   
-64    -128   
-240   80     
-16    16     
208    -32    
96     -208   
-80    48     
336    0      
-608   384    
256    -224   
464    -336   
32     -608   
-480   432    
-112   -32    
608    -208   
320    288    
-608   -112   
-304   240    
416    -336   
16     -32    
176    -288   
-176   160    
-48    -496   
-16    80     
176    112    
112    0      
-288   -96    
192    32     
-128   128    
128    96     
-176   -48    
-192   -432   
-48    32     
144    -400   
-208   64     
816    256    
-544   672    
1456   256    
-2944  -352   
-336   -368   
1424   -400   
-848   -480   
-176   -352   
-96    -96    
112    1184   
320    -992   
144    -976   
-224   576    
-240   16     
208    -112   
160    208    
-224   -128   
-1296  -240   
-80    16     
224    -176   
-704   272    
-96    16     
-400   -544   
1456   624    
-464   -160   
-800   -80    
640    80     
-320   1328   
-416   1808   
224    944    
576    -320   
-656   752    
512    928    
64     368    
-208   256    
48     416    
384    32     
-704   -128   
64     -144   
-336   -896   
-48    -528   
384    -16    
-448   192    
64     -64    
272    -32    
64     -496   
-928   -1904  
-624   -672   
736    576    
-288   1536   
560    192    
240    768    
-816   544    
-112   -112   
288    -560   
64     -112   
-192   -192   
-208   208    
992    832    
464    272    
-192   400    
352    -192   
-320   128    
496    32     
144    512    
-608   -32    
-272   -80    
224    -288   
304    -64    
-224   48     
0      400    
-128   -448   
1504   2080   
-1472  848    
832    -48    
1008   -320   
-720   256    
96     688    
-192   416    
128    -208   
96     304    
64     -80    
-608   144    
208    0      
-96    -160   
16     112    
-752   48     
-432   128    
400    32     
-48    160    
624    768    
-592   1232   
96     16     
272    -384   
-176   -224   
208    352    
272    176    
-512   240    
320    -192   
-448   -208   
672    -272   
-336   -608   
160    -160   
208    -144   
64     176    
160    -176   
-192   -32    
-128   0      
368    -80    
80     0      
-48    16     
-64    96     
32     32     
-224   -32    
336    48     
-48    -64    
-528   -64    
304    128    
-864   -128   
16     0      
-352   48     
112    16     
304    80     
-160   -32    
-272   -336   
336    -272   
144    128    
-96    -208   
272    -272   
-144   48     
-16    416    
-208   -32    
-48    96     
-1344  -16    
160    112    
-224   80     
112    16     
176    96     
128    -112   
-624   192    
176    128    
256    -224   
-48    336    
0      48     
-128   0      
80     -16    
-144   0      
64     160    
144    112    
-288   16     
176    96     
16     80     
32     96     
-816   -2176  
320    432    
912    -208   
-1328  -752   
1216   32     
-48    -64    
-512   304    
-240   96     
288    -112   
80     192    
-176   -48    
-144   224    
128    112    
32     -416   
32     336    
0      96     
-176   112    
192    -80    
-80    96     
-80    -128   
256    960    
-768   -624   
-224   368    
1344   240    
-480   32     
-240   96     
176    176    
240    80     
80     -80    
-160   128    
224    112    
-336   96     
160    -112   
96     48     
-368   32     
320    112    
-16    -144   
-256   304    
256    -80    
-96    272    
208    0      
-384   160    
240    80     
-208   0      
512    96     
-176   0      
-304   272    
368    -48    
-208   80     
-272   -832   
416    -1072  
496    -368   
224    192    
-528   -16    
160    256    
-128   -80    
32     240    
432    -288   
-608   -128   
-48    32     
-64    64     
320    112    
-96    96     
-160   -32    
368    224    
-176   80     
0      0      
-128   32     
288    -128   
48     -16    
16     128    
-560   -528   
512    96     
80     -176   
-480   -64    
512    384    
0      0      
-96    -16    
336    -320   
-720   224    
432    96     
208    64     
-144   64     
-112   32     
240    224    
-64    -16    
48     0      
-144   384    
48     -96    
528    -176   
-160   96     
-16    208    
368    16     
-560   -192   
544    -144   
128    224    
-144   432    
-832   80     
496    -176   
64     192    
-224   -16    
272    16     
80     112    
-112   128    
288    208    
-16    0      
64     -48    
-592   -432   
496    112    
192    0      
-720   144    
512    80     
192    -720   
48     304    
-304   -1072  
-80    -160   
144    112    
-80    224    
-32    0      
-224   784    
2288   2928   
-2208  1760   
512    256    
2736   -288   
-1552  -16    
-704   -144   
448    368    
656    -256   
112    400    
-304   -176   
-320   256    
272    112    
320    80     
96     240    
-464   192    
176    208    
320    32     
-48    112    
-128   -176   
208    -448   
-144   -32    
304    624    
-128   128    
-272   32     
80     -624   
192    192    
272    32     
-304   -272   
160    -752   
0      -64    
112    704    
208    -176   
-112   -560   
128    272    
-320   48     
464    128    
-336   16     
176    -608   
336    -1088  
-288   -1216  
96     -192   
-16    -144   
320    144    
-192   304    
128    576    
528    48     
-752   -1104  
288    -1120  
224    912    
48     672    
-80    -288   
128    848    
-256   -528   
-240   -496   
624    -960   
-768   288    
160    560    
80     96     
-80    256    
128    160    
-128   -16    
48     -288   
144    336    
-32    -16    
-80    -112   
-96    -496   
-64    816    
-160   -368   
16     -224   
-96    -176   
352    -16    
-288   -544   
336    48     
-320   32     
112    432    
192    64     
-32    96     
80     112    
-288   128    
256    304    
-80    -16    
-320   -128   
864    -688   
-592   384    
880    -512   
-464   352    
96     -64    
192    -496   
48     -384   
-160   176    
96     304    
-176   -832   
128    -2128  
240    -176   
0      -256   
-176   64     
304    -704   
368    48     
-208   160    
-48    -16    
-32    160    
800    192    
-1344  336    
736    -176   
192    0      
-80    -256   
32     -224   
-160   -752   
-176   -944   
432    -768   
80     176    
-192   -544   
-272   -464   
224    -2144  
16     224    
-256   80     
96     -240   
160    -944   
272    -208   
192    -288   
-144   96     
-304   64     
272    224    
-320   544    
160    32     
-256   16     
64     16     
448    -16    
-32    0      
-240   -176   
-176   -656   
-1088  -1216  
608    -288   
-80    -416   
-704   -736   
640    -176   
480    -544   
-432   -176   
448    224    
-64    1616   
144    544    
160    -640   
-336   -192   
-192   272    
432    80     
32     -864   
-64    -160   
-176   208    
96     656    
256    464    
32     -32    
-224   240    
432    -1248  
-1920  96     
1760   -512   
-1744  -112   
-160   432    
-592   48     
160    -1024  
64     -304   
-192   -608   
304    192    
16     -80    
-48    -160   
-336   -16    
400    144    
-384   16     
80     -160   
-160   -80    
112    -256   
-144   144    
-96    160    
208    432    
64     160    
-704   -192   
-368   -1200  
544    -208   
0      -672   
-272   -144   
80     -80    
-128   -112   
576    -208   
-304   176    
-80    0      
352    80     
160    32     
64     -464   
-1344  -624   
640    -400   
432    208    
-400   -160   
-32    128    
288    -832   
64     -112   
752    -176   
-496   64     
448    -48    
208    80     
176    -64    
-256   -128   
160    -848   
-640   2464   
1184   128    
-1408  -240   
-176   -160   
912    -272   
480    320    
-832   -736   
-80    -48    
-160   192    
240    160    
-144   -48    
-224   16     
-112   -80    
-288   192    
128    -144   
160    304    
-176   -176   
-128   -64    
336    -368   
-656   -352   
544    -192   
-224   112    
432    -224   
-704   160    
192    256    
-128   448    
336    80     
-224   96     
-160   128    
176    128    
-336   -32    
-368   -208   
96     -272   
112    0      
-720   96     
-64    112    
144    -400   
-176   -864   
-144   -304   
160    48     
-272   144    
-160   -80    
496    -16    
-144   -112   
-128   16     
-48    -224   
16     -144   
-80    -400   
-336   -160   
272    -240   
-224   144    
160    192    
-1040  224    
592    704    
-496   128    
-400   400    
464    432    
-928   368    
176    -32    
-480   192    
320    32     
96     32     
-352   -144   
96     -96    
-528   16     
432    320    
-96    416    
272    -32    
-352   64     
-208   208    
272    128    
160    48     
-144   16     
-352   -16    
-96    128    
160    -96    
-32    -32    
16     -64    
-64    -80    
-160   -48    
560    1648   
-1056  -2080  
-896   352    
1808   -240   
-912   -80    
224    416    
-688   96     
592    352    
-592   368    
-96    -208   
-32    -304   
-128   208    
160    -288   
-64    112    
48     -32    
-160   128    
112    -176   
-32    192    
-48    144    
-32    80     
-80    208    
144    1472   
896    -256   
-1152  -128   
384    32     
-512   -272   
96     320    
192    192    
-464   240    
-96    -160   
160    -16    
224    32     
-176   144    
-128   0      
-16    -48    
-96    48     
256    16     
-288   -112   
-256   32     
368    0      
-1376  16     
416    64     
-144   -32    
0      0      
224    192    
-336   64     
-240   192    
304    0      
0      -16    
-144   256    
1024   1744   
-1488  768    
-928   336    
1136   -304   
-288   -32    
-336   -16    
432    336    
-1184  -16    
-48    272    
400    48     
-112   112    
-176   80     
-128   144    
480    192    
-272   48     
-96    336    
80     -96    
-160   160    
0      160    
-32    464    
-208   -80    
432    1168   
-864   -816   
-560   384    
944    560    
96     -64    
16     176    
-272   544    
16     -176   
192    -64    
-288   48     
208    -48    
-208   144    
-80    -16    
288    -64    
80     96     
-160   80     
-48    -432   
-352   432    
256    -32    
-128   -208   
-64    128    
288    768    
592    -512   
-560   176    
192    464    
368    -96    
-192   96     
-80    64     
-48    64     
-48    96     
-48    48     
128    208    
32     0      
-160   -96    
-64    -320   
240    64     
608    -144   
-416   -64    
864    368    
-624   192    
-112   -80    
80     160    
-48    -96    
80     112    
-176   -48    
560    -272   
-16    240    
-32    -176   
464    352    
-640   -80    
1152   480    
1376   -400   
-2048  -272   
-224   128    
1296   160    
-656   -448   
384    -880   
32     176    
336    576    
-656   336    
256    80     
48     240    
-48    160    
128    256    
288    336    
-528   416    
112    -384   
544    -32    
-224   544    
-48    128    
-80    -240   
256    -256   
-64    -512   
-224   -992   
176    -80    
112    480    
48     832    
80     672    
-192   368    
192    -240   
96     -320   
-192   304    
208    752    
-64    224    
96     208    
128    576    
320    1040   
-224   1024   
32     -1328  
256    -48    
-112   80     
32     288    
32     864    
-48    544    
432    -912   
-96    -352   
112    224    
-464   -448   
176    208    
-144   64     
-176   -800   
576    64     
-320   -128   
48     192    
-80    656    
240    704    
64     80     
-512   -1264  
192    -640   
16     304    
304    656    
-80    176    
-144   64     
-128   112    
160    208    
-288   416    
112    16     
160    400    
-16    -192   
368    -80    
-240   128    
208    -80    
-32    80     
32     64     
128    48     
16     16     
-304   -80    
416    -352   
352    64     
-96    144    
48     16     
-432   992    
672    -288   
-464   -240   
144    192    
112    -400   
-240   320    
480    272    
-16    192    
-64    -32    
160    32     
16     -16    
144    -16    
-16    -112   
160    80     
-176   -96    
224    -656   
208    -208   
128    -528   
16     320    
-320   -560   
784    -704   
-80    560    
192    352    
-368   144    
-160   -160   
48     -720   
224    848    
464    272    
-400   176    
-336   96     
448    -224   
224    272    
-64    -304   
400    128    
-368   -800   
0      320    
32     -1040  
448    -208   
-256   -528   
-32    720    
-96    624    
576    -560   
16     -336   
-192   352    
-224   272    
256    368    
336    -176   
-16    -16    
96     192    
1440   1088   
-1456  608    
-1056  -256   
1024   -464   
1696   -1040  
-1888  -208   
1632   304    
192    -176   
-992   -672   
880    64     
80     -16    
-192   -48    
160    128    
80     -832   
-288   -80    
80     -816   
208    160    
160    -80    
-176   176    
-16    64     
32     -48    
-816   -800   
1488   -464   
-224   -80    
-784   -32    
848    336    
-144   -704   
-592   352    
352    -272   
-384   -48    
192    -176   
240    96     
80     -80    
128    336    
-592   160    
16     64     
448    96     
16     320    
-624   128    
64     -496   
240    272    
64     -624   
608    704    
144    64     
-16    -144   
320    448    
-144   640    
-80    -400   
208    480    
736    64     
-528   -400   
-64    -64    
240    -144   
-112   -1248  
160    -160   
352    -368   
16     -80    
128    -464   
-480   -112   
224    -624   
160    -448   
32     176    
-256   -96    
96     -336   
208    80     
656    512    
-1488  176    
208    -352   
528    -240   
16     1312   
-96    448    
-176   -1488  
816    -272   
832    -16    
-1040  -896   
-544   288    
864    80     
272    16     
-16    -288   
-32    304    
16     -304   
96     80     
528    -240   
-144   80     
-32    -128   
240    16     
224    -16    
-272   -32    
128    16     
-176   -448   
864    208    
-832   16     
560    112    
-96    -288   
32     208    
-592   -336   
448    320    
-448   -320   
-304   16     
176    -288   
-624   -112   
304    -192   
-144   -112   
128    96     
-256   112    
688    240    
-256   -1584  
192    -192   
224    -96    
-240   96     
96     -128   
32     64     
-32    -128   
208    208    
-448   288    
-176   112    
-1248  64     
400    0      
-192   32     
-16    -224   
-32    -176   
80     -1024  
-96    464    
864    -96    
-624   -128   
288    -464   
256    -112   
-272   -128   
64     -336   
-128   64     
64     -112   
-320   160    
144    32     
-48    -32    
0      -528   
160    -144   
-112   592    
-288   288    
240    64     
480    880    
144    80     
-432   -336   
-96    64     
0      128    
256    -160   
-64    -16    
-352   -80    
-384   208    
-304   -384   
240    -608   
-176   144    
1152   2160   
-2480  544    
864    -1840  
640    -368   
-368   -112   
48     48     
-320   16     
688    288    
-336   144    
128    -288   
-384   48     
-112   16     
112    -16    
0      -16    
-192   -768   
176    192    
64     336    
-112   -608   
304    -560   
-48    192    
-176   0      
832    144    
-320   64     
-352   -192   
384    -80    
-336   48     
192    -32    
208    0      
272    16     
-496   448    
-80    -368   
240    192    
288    -768   
-160   -48    
-160   -32    
400    32     
-96    -32    
-16    128    
80     -48    
-256   32     
208    32     
64     -80    
-128   16     
112    -272   
112    -16    
-1168  -288   
112    160    
-80    144    
-128   16     
-80    48     
48     -1648  
-2048  -752   
1392   -336   
-720   -176   
-256   -64    
880    -112   
-1088  144    
0      48     
32     -96    
-192   32     
16     0      
288    336    
-96    192    
-320   192    
-304   -48    
464    -32    
-240   128    
-80    160    
272    256    
208    -64    
-160   48     
512    -320   
-1744  928    
1552   448    
-800   352    
-912   -368   
864    320    
-1136  432    
224    -96    
-272   -368   
-144   48     
368    128    
-576   -32    
-160   -96    
64     -224   
192    64     
-400   16     
208    192    
-592   0      
96     -32    
112    160    
320    144    
-560   -432   
656    -608   
-736   752    
704    -304   
-560   -16    
-992   880    
432    -144   
-192   -256   
80     96     
64     -64    
-288   0      
80     -144   
336    160    
672    640    
-768   -224   
384    -160   
240    304    
-96    -64    
64     -192   
-128   272    
-32    112    
96     -112   
-64    112    
-448   368    
-304   384    
288    304    
-496   176    
32     160    
-112   240    
-320   1648   
1360   -80    
-592   -976   
-928   48     
896    -432   
480    -1392  
-896   -1488  
-176   -16    
-160   16     
336    768    
-624   -864   
-544   464    
-48    -208   
144    192    
144    256    
-64    368    
-80    -64    
160    112    
-160   160    
64     -160   
144    -176   
-16    128    
-352   -128   
112    208    
-16    -416   
-560   -800   
288    304    
208    1408   
-560   -448   
96     16     
-96    624    
240    240    
112    0      
-112   336    
288    496    
0      352    
-128   -176   
160    512    
-144   1024   
-64    -48    
-176   -272   
464    -224   
-368   176    
-208   -240   
-208   160    
320    112    
80     32     
-464   -928   
-192   160    
64     -80    
-80    -368   
576    -512   
-864   -480   
-240   -1488  
-336   -816   
-64    -464   
64     -640   
16     624    
320    368    
-320   464    
32     0      
96     208    
16     -16    
-48    -160   
16     112    
176    128    
-400   752    
64     448    
-416   -720   
288    -16    
128    -48    
64     304    
-304   64     
208    -128   
384    336    
-16    304    
48     576    
-304   1104   
-48    384    
800    -128   
-704   144    
112    -880   
416    16     
-160   576    
192    848    
256    480    
-368   128    
-144   480    
48     224    
-80    560    
16     304    
-176   256    
-32    496    
208    272    
160    320    
-32    96     
-400   256    
-80    368    
144    144    
96     48     
-64    576    
-160   -352   
-64    16     
416    -1088  
-464   -1568  
64     528    
448    -80    
-304   320    
224    -112   
-32    -112   
-256   256    
16     128    
528    -160   
-256   128    
-384   -32    
272    128    
64     -16    
192    -80    
32     272    
32     -80    
-368   -368   
64     -32    
192    -160   
-192   16     
384    16     
-528   128    
320    176    
-80    48     
-80    -112   
496    352    
992    160    
-2720  -464   
-848   -320   
1952   -64    
-1232  -128   
144    32     
192    112    
-272   784    
560    480    
32     80     
256    64     
-400   -64    
112    176    
-64    64     
432    -592   
-352   144    
144    16     
128    48     
80     128    
-48    16     
16     176    
-640   80     
1744   -288   
-752   272    
64     256    
368    208    
-224   -176   
112    -32    
-224   -304   
-112   -208   
384    80     
16     32     
112    192    
-96    -32    
-64    496    
240    -208   
-496   448    
640    832    
-368   640    
-368   0      
240    -48    
48     -48    
400    0      
-608   256    
272    -304   
-96    0      
240    -1200  
-96    -176   
-896   160    
320    -128   
144    32     
240    -48    
-16    -48    
-240   128    
-192   144    
736    432    
0      16     
112    16     
80     528    
-496   -256   
592    96     
272    -1008  
-448   240    
-192   304    
32     -64    
-208   48     
848    96     
-400   -80    
-848   128    
1216   704    
-2432  -1104  
-480   224    
672    128    
-64    176    
256    176    
-352   224    
-304   448    
96     -16    
-32    -336   
416    -208   
-48    16     
-160   -128   
192    -64    
64     288    
-240   48     
288    64     
176    96     
-176   -160   
192    464    
-64    -416   
-112   368    
848    -368   
-880   80     
-224   -192   
496    256    
-272   -80    
-208   144    
304    -416   
-576   80     
336    -304   
-560   -96    
656    0      
-384   208    
496    272    
-144   384    
-272   96     
-16    -176   
-16    64     
416    -272   
160    80     
-176   -32    
-64    128    
288    160    
48     192    
128    160    
112    -144   
-176   48     
336    160    
-304   304    
272    -240   
32     32     
32     752    
-336   80     
-128   368    
32     -32    
-32    -176   
-80    192    
256    256    
544    208    
-32    272    
176    80     
-288   -288   
80     -240   
256    -144   
-128   -176   
0      176    
-144   16     
400    -80    
-96    256    
352    304    
-144   -224   
-176   -1568  
304    368    
144    -32    
-80    -448   
16     320    
-272   -432   
192    -496   
192    -560   
-32    96     
-592   -1168  
1168   -2112  
-464   -240   
976    0      
-1184  -1200  
256    -448   
48     -240   
832    912    
-272   560    
-448   -720   
128    -464   
464    -336   
-48    112    
16     -208   
-144   128    
208    -3216  
-160   -240   
352    -704   
-112   96     
16     -16    
0      48     
48     -1168  
48     320    
256    -144   
-1344  -48    
48     -1088  
16     -256   
176    -240   
-352   -384   
48     128    
96     -1232  
208    -528   
-32    -688   
-224   208    
560    -48    
64     192    
224    128    
-272   80     
-64    -208   
464    144    
-224   0      
-256   -16    
64     -16    
256    -80    
-16    0      
0      -128   
80     288    
-64    -832   
224    0      
80     -128   
-720   -96    
1200   -1008  
-16    736    
272    272    
-384   -80    
-384   192    
240    -208   
-496   32     
288    128    
-192   336    
128    480    
320    352    
-160   -896   
-320   -80    
480    -16    
-192   80     
0      80     
224    272    
-400   288    
112    80     
-96    0      
480    1088   
-896   -992   
-1632  128    
2240   -688   
-944   -480   
-736   368    
224    176    
784    848    
-192   496    
16     592    
16     48     
-176   -208   
96     -32    
32     352    
-176   416    
112    208    
-272   -112   
288    -480   
-1712  -288   
464    160    
-208   368    
96     304    
-240   -128   
400    -1632  
-112   -288   
-656   784    
1008   224    
128    400    
0      -336   
-112   -240   
-176   -432   
-208   0      
144    -432   
-624   272    
912    -656   
352    160    
-352   128    
432    176    
-704   -784   
192    -224   
-48    -208   
-432   0      
144    -352   
320    144    
-32    -304   
-416   -336   
-80    -176   
-112   0      
-560   144    
208    -48    
192    -2192  
-2448  -1056  
800    96     
368    304    
-32    224    
208    576    
-304   1520   
288    784    
384    -1056  
-320   496    
-96    496    
-336   -352   
80     0      
176    80     
-1264  -384   
-320   480    
-336   -112   
-96    144    
240    -192   
-112   -320   
-336   -352   
-720   -112   
288    -32    
-32    -128   
-192   -160   
-160   240    
-16    128    
384    -176   
352    368    
-384   -64    
0      -240   
-96    144    
32     -224   
-96    -208   
-96    304    
-240   128    
-336   -496   
256    -112   
-608   -192   
128    -736   
304    -448   
-304   -48    
-256   -720   
-144   -64    
336    -176   
-80    352    
-144   256    
-128   -496   
208    -864   
-160   416    
-432   -96    
-256   336    
1312   -976   
-688   -496   
-560   -928   
-416   -368   
-272   -464   
256    -608   
-112   736    
0      -144   
-688   -1344  
192    -400   
224    160    
-208   208    
-64    -160   
48     112    
16     336    
-96    512    
-128   384    
80     160    
-608   -320   
240    80     
-96    -80    
-32    144    
384    768    
-80    704    
-16    384    
240    192    
-800   -16    
-144   128    
112    0      
880    1376   
-64    -224   
-512   -224   
-432   1184   
192    880    
160    640    
-320   -144   
-64    208    
16     0      
48     112    
208    -112   
-48    32     
-96    128    
96     -432   
96     128    
-128   -176   
-304   80     
224    192    
-32    48     
-144   -144   
736    768    
-1328  656    
576    -224   
176    -32    
-384   128    
-224   -592   
112    -208   
64     -240   
-352   -432   
256    144    
16     -32    
-176   240    
224    0      
-96    176    
-288   -128   
96     160    
-272   336    
48     112    
-96    144    
144    -96    
-192   -32    
48     64     
320    80     
-336   -16    
432    128    
-256   16     
128    112    
-96    16     
-64    32     
-160   -240   
1104   -656   
-816   -256   
0      -176   
496    -64    
16     480    
-400   64     
304    384    
320    112    
-32    208    
-128   16     
192    176    
-96    -80    
144    256    
-288   0      
16     224    
192    80     
-208   -128   
-272   64     
240    16     
-256   0      
48     64     
640    672    
800    48     
-560   432    
416    -16    
-224   272    
-64    192    
-80    144    
528    176    
-320   80     
-64    160    
-336   -48    
48     0      
208    0      
0      128    
64     32     
-48    128    
80     -160   
-32    -656   
0      144    
-80    208    
-32    416    
-464   -64    
592    320    
192    -256   
-1200  160    
256    464    
-320   304    
-96    304    
416    -16    
-464   -160   
80     32     
400    128    
48     144    
256    -80    
32     352    
-96    256    
-304   240    
352    80     
176    128    
-16    -16    
-32    96     
448    -160   
-112   48     
-288   0      
288    192    
736    432    
-112   144    
-432   112    
928    416    
-1120  2768   
1824   -2272  
-1344  -320   
1344   -48    
-944   32     
-96    320    
512    -240   
-208   112    
320    0      
-112   320    
-144   96     
-304   48     
752    128    
-432   -32    
-208   96     
-80    80     
32     176    
-32    -48    
528    848    
-736   752    
272    496    
416    -128   
-336   -32    
144    144    
-272   32     
64     176    
176    -112   
0      -192   
-64    -96    
0      -32    
-96    128    
256    -96    
-112   16     
304    -96    
-288   80     
160    -1664  
48     -32    
240    -16    
-16    272    
48     288    
208    80     
-240   96     
48     288    
176    80     
-144   32     
96     48     
272    96     
-64    -368   
-464   -272   
416    -320   
-80    -608   
128    -400   
-848   320    
528    288    
-688   784    
640    496    
64     -64    
-288   -464   
-272   -416   
192    48     
48     -80    
-32    64     
-32    -32    
112    -192   
-96    -112   
32     -64    
-48    96     
144    -800   
-32    176    
112    48     
80     224    
96     -144   
-176   -144   
0      -416   
-128   80     
80     208    
-96    -96    
32     -192   
96     -128   
-80    16     
-32    -48    
736    2640   
784    -304   
-1200  -240   
304    -224   
-208   592    
544    -704   
-272   208    
-64    -352   
-80    16     
112    -32    
304    16     
48     336    
-160   -208   
48     -208   
96     -496   
96     240    
-48    -80    
128    256    
-144   -1184  
112    -272   
-16    -768   
224    -224   
-288   432    
-16    992    
176    -496   
-208   -720   
128    16     
80     -48    
16     -32    
64     144    
-32    -64    
-32    -144   
112    -272   
384    -1424  
-96    256    
240    304    
-64    320    
-304   -800   
416    784    
48     0      
-176   -144   
-96    272    
-48    -32    
400    160    
-64    -720   
-288   144    
-64    -160   
336    48     
592    576    
-560   1120   
-1328  1040   
3264   -800   
-1152  208    
-752   144    
1200   0      
-288   96     
160    160    
144    80     
-192   128    
80     -256   
128    432    
48     -32    
-176   -32    
352    -128   
48     -64    
-64    -32    
32     256    
160    464    
-192   48     
160    288    
16     -32    
928    -1440  
-2048  432    
912    -272   
800    -752   
-208   432    
-192   -16    
400    -2208  
-208   -1360  
32     -944   
384    1328   
-640   -944   
192    -448   
288    240    
-320   336    
-368   176    
352    -240   
208    608    
176    -1312  
16     96     
-176   400    
368    160    
128    -144   
-48    -512   
624    128    
480    368    
-928   -1824  
304    -608   
-560   -288   
-144   -192   
496    96     
-336   -688   
816    176    
-272   -208   
144    336    
176    -3664  
-368   -768   
896    -960   
-608   64     
640    80     
-432   0      
160    -272   
320    768    
-592   704    
288    416    
-1808  480    
-16    -192   
-128   -304   
80     -304   
272    -64    
1120   1440   
-1024  768    
-320   -400   
1568   -672   
-128   1088   
-352   2080   
-16    160    
160    -816   
432    -320   
0      -544   
-208   320    
-128   32     
288    -304   
-32    -736   
-176   -96    
-144   160    
32     256    
64     -1552  
-80    304    
-192   -384   
16     -208   
-32    -352   
-96    112    
688    -128   
-560   1136   
400    640    
-128   32     
-352   -48    
192    -448   
64     -848   
-448   -1024  
176    16     
400    224    
-144   320    
-160   -64    
144    320    
0      288    
-16    96     
176    208    
-176   -80    
-64    32     
144    320    
-480   384    
224    368    
-80    -320   
-304   -80    
-80    80     
-208   -944   
448    512    
160    592    
-64    480    
-368   -912   
112    -496   
448    448    
560    1216   
-560   1328   
416    1248   
80     1072   
48     752    
-480   -160   
-800   -496   
288    -80    
304    -368   
16     -192   
176    -48    
-240   0      
144    -464   
-256   -448   
-16    -576   
-480   -352   
32     -272   
176    -80    
-208   -144   
-64    -192   
-160   128    
256    512    
-176   896    
144    -176   
-80    -640   
-160   -704   
-192   -704   
640    -2224  
-272   880    
1008   -320   
-400   32     
-416   -32    
304    -384   
-32    256    
160    -432   
-576   208    
208    16     
48     160    
96     -432   
32     304    
-320   -144   
240    64     
-32    -16    
112    -288   
32     176    
-48    176    
48     -32    
656    -96    
-1696  368    
1072   -32    
-256   -176   
-864   0      
912    -272   
-864   -224   
-624   -432   
-208   144    
224    304    
16     -64    
-736   64     
-112   -80    
0      64     
-240   -144   
80     -128   
176    0      
-464   -64    
-48    64     
-192   -128   
448    80     
-512   -64    
144    32     
-112   128    
16     176    
-32    64     
-304   64     
160    16     
-432   176    
1376   368    
-2000  224    
640    -352   
-320   -336   
-272   0      
736    112    
-272   96     
-384   192    
-80    288    
288    -64    
48     -32    
-240   16     
-208   64     
256    80     
400    96     
-768   -32    
480    -80    
-400   96     
192    64     
0      112    
-112   -48    
416    176    
432    -320   
-1840  -144   
1856   -160   
-1216  -32    
32     208    
464    224    
-272   368    
112    176    
-16    -48    
-752   -64    
48     96     
96     16     
96     208    
-176   -352   
-80    144    
-32    -240   
352    -320   
-352   208    
112    -96    
48     32     
432    464    
64     0      
-208   32     
-112   -112   
0      -480   
368    -112   
-640   -480   
48     -128   
224    -80    
-288   16     
-112   432    
-48    208    
-192   -112   
-320   48     
784    160    
-288   -560   
736    -416   
-128   32     
192    48     
-352   64     
-112   128    
-480   -16    
416    96     
-240   48     
-192   112    
-224   112    
-32    96     
352    -176   
1840   5600   
-1264  1328   
160    -800   
1616   -352   
-784   -64    
-704   112    
160    -32    
336    176    
-272   -720   
-800   64     
624    48     
-480   64     
480    32     
80     96     
-320   48     
32     192    
416    64     
-64    16     
-224   -192   
448    16     
-64    -320   
-128   -128   
-16    224    
-592   32     
-192   48     
624    112    
-384   -176   
272    -144   
-160   -240   
160    48     
144    16     
-192   0      
-80    -48    
-80    144    
32     -480   
-368   -352   
432    -288   
-304   -176   
32     -112   
-224   0      
48     96     
336    -80    
-272   -64    
16     240    
80     608    
32     -192   
-704   -1216  
128    -688   
-192   -80    
-96    -400   
272    -112   
-256   240    
-160   0      
-80    -304   
192    -384   
-160   -400   
-112   -656   
-288   -544   
192    -320   
192    -288   
-112   -240   
16     -64    
-128   64     
-128   -64    
416    -544   
112    -512   
-352   -384   
-400   -352   
80     -720   
208    -80    
48     832    
-96    96     
96     -112   
-48    -48    
96     0      
-176   -304   
32     48     
-128   -96    
272    -304   
-64    592    
-144   -192   
624    -192   
-1056  1168   
256    -432   
384    -1136  
528    -80    
-176   512    
96     608    
192    -928   
176    16     
144    384    
-304   -96    
-208   352    
224    -48    
224    48     
-272   64     
-16    304    
16     352    
352    80     
16     96     
16     -128   
592    240    
-1152  832    
656    -96    
448    816    
-272   496    
-416   -144   
-16    32     
208    -304   
160    -64    
0      160    
-80    288    
-160   0      
160    96     
128    112    
-176   448    
480    304    
-576   64     
-192   288    
528    48     
-256   0      
-224   -64    
-16    144    
400    -80    
112    -64    
144    -16    
-368   96     
160    -400   
320    96     
-16    192    
-272   208    
-1088  -1248  
320    400    
-304   -368   
-496   -48    
448    160    
240    -224   
208    -112   
-528   -720   
-384   -240   
176    -160   
336    704    
-224   -160   
-16    -256   
192    272    
0      -144   
-224   384    
80     -80    
352    -160   
-528   -544   
16     688    
-192   -464   
1200   864    
-352   -48    
-448   -384   
432    -752   
-800   -112   
400    -256   
944    592    
208    -1488  
-928   -1648  
224    -592   
224    528    
-144   416    
496    -48    
112    -128   
176    -80    
-352   -16    
416    528    
288    -160   
-224   -96    
-32    160    
144    -112   
16     -192   
176    -624   
-112   848    
-208   1968   
32     1488   
-160   176    
416    -96    
-448   64     
272    -64    
176    -384   
-192   80     
16     768    
384    80     
-464   -224   
272    -256   
384    2304   
800    224    
-304   0      
320    -880   
16     48     
80     176    
192    -400   
-272   -176   
576    -640   
-336   208    
96     80     
-304   -208   
0      -96    
1536   1712   
-1792  80     
352    272    
768    288    
480    1152   
-1552  -832   
288    -1488  
944    -256   
48     -64    
-496   272    
-240   240    
176    32     
400    -160   
-96    32     
-288   -384   
-528   48     
480    -208   
240    64     
-48    416    
-16    800    
-48    -736   
368    -112   
-352   -544   
16     336    
288    176    
-752   416    
704    144    
-16    -288   
-320   96     
304    416    
-160   624    
352    -160   
112    48     
-352   -448   
-96    256    
48     -464   
144    288    
208    240    
48     -112   
-176   160    
160    144    
144    384    
112    -144   
-64    -64    
-32    -96    
272    176    
112    192    
304    -96    
160    -560   
-320   16     
64     -208   
672    512    
-928   560    
192    -496   
-160   -32    
-352   96     
224    48     
-224   -96    
-80    -688   
192    -112   
112    -1280  
32     -80    
32     400    
384    320    
-64    -768   
-128   16     
240    -160   
32     112    
-288   -384   
496    176    
-224   48     
-16    -352   
16     112    
48     -464   
16     32     
432    -176   
-928   608    
416    -944   
64     -176   
96     -496   
0      0      
-784   416    
2512   -1088  
-1408  80     
-96    -480   
352    224    
112    -288   
-976   368    
176    -64    
-96    -32    
160    -112   
160    -160   
0      -752   
-80    48     
336    400    
-80    192    
-16    -128   
224    -144   
-224   224    
80     -144   
48     -80    
624    992    
-1248  -304   
-304   128    
1056   -704   
-192   -416   
-64    0      
-336   -352   
336    96     
16     -1504  
368    -64    
-400   -80    
-128   0      
160    96     
352    -16    
-688   96     
208    -48    
-80    -224   
288    -32    
-304   -48    
256    32     
-208   16     
-144   -80    
32     112    
32     -896   
448    112    
-608   -192   
192    288    
160    -48    
-128   64     
-16    -608   
80     -288   
368    -720   
336    -224   
-480   80     
-64    176    
128    112    
288    64     
-112   192    
64     -496   
-272   80     
288    48     
144    80     
-80    16     
-208   -160   
400    32     
-320   -64    
-576   -128   
384    112    
-288   -160   
112    16     
16     32     
-736   -944   
432    -112   
592    -528   
-832   -320   
768    -816   
192    -64    
-224   -256   
-384   128    
256    -32    
112    32     
-240   80     
368    64     
-16    -96    
-448   -272   
592    -16    
-16    0      
80     160    
-144   -48    
240    144    
224    48     
-144   -416   
736    224    
96     -32    
-144   0      
160    144    
-128   208    
48     -96    
1072   -624   
-784   224    
544    256    
32     -128   
240    144    
-528   -304   
96     192    
-128   -240   
384    -208   
-96    208    
-224   688    
-336   16     
16     -32    
192    -48    
-128   -256   
32     48     
-16    -48    
0      -128   
-320   -176   
0      96     
-416   -304   
496    912    
-432   -1056  
-2240  -192   
1168   -208   
-304   -80    
816    224    
-736   64     
-992   176    
1104   224    
-480   -32    
192    208    
144    -48    
-464   -16    
-32    64     
32     -96    
-160   0      
-128   224    
288    -32    
-288   80     
-16    -272   
192    -32    
-1056  224    
80     112    
64     160    
512    144    
-688   -272   
560    192    
-144   -256   
-128   48     
480    -288   
-576   -400   
32     -368   
-176   -48    
32     -16    
-320   -112   
128    -464   
-208   -352   
16     176    
336    -544   
-192   -512   
-448   -528   
208    48     
32     0      
16     176    
0      128    
-160   144    
-160   432    
-80    -464   
176    96     
336    1072   
-304   384    
16     -976   
-80    160    
-496   304    
-128   176    
-160   16     
-160   208    
208    -416   
-336   224    
64     1856   
288    544    
-432   -144   
288    -240   
-128   288    
128    -96    
-336   -48    
-48    496    
-32    176    
16     -80    
336    32     
-896   272    
-80    -128   
-176   112    
-176   -80    
416    -48    
-320   704    
32     304    
-160   -160   
16     -208   
-48    192    
96     144    
-240   -64    
-464   -272   
640    -880   
-352   464    
112    -672   
-400   -80    
96     176    
32     -32    
160    336    
160    16     
-176   16     
-144   64     
48     112    
32     96     
96     160    
-192   80     
272    64     
-192   112    
80     48     
-160   -160   
0      112    
688    48     
-1552  64     
688    0      
-16    16     
160    -288   
-96    80     
128    176    
-336   -32    
-32    416    
128    -32    
64     -48    
-208   -176   
-16    128    
-480   -16    
224    -32    
160    64     
-48    64     
48     224    
-112   -304   
-80    32     
48     288    
-208   368    
-160   112    
288    96     
-112   352    
-208   352    
-208   -16    
240    160    
-80    -320   
-304   -144   
-64    -672   
-2448  -640   
1728   560    
-624   112    
176    -128   
272    -352   
208    -592   
-144   1616   
-208   128    
96     -752   
-64    624    
-192   -352   
224    80     
-176   -416   
-112   288    
240    0      
-128   -144   
144    -496   
-256   832    
64     608    
-208   -544   
1072   -880   
-1696  -112   
1408   384    
-176   240    
-272   384    
96     -464   
1008   480    
-16    720    
-288   640    
32     -320   
-448   -80    
192    -112   
400    -256   
48     192    
-112   320    
-112   -16    
416    640    
464    416    
-16    176    
-688   400    
-16    -64    
368    624    
-384   -272   
240    -400   
64     -48    
352    -528   
-544   -192   
448    -384   
-480   -32    
240    224    
112    384    
-352   -32    
-272   -192   
-16    -912   
-192   256    
224    160    
-528   -272   
592    272    
-96    -32    
-496   160    
368    0      
-48    -208   
528    48     
-272   192    
384    -16    
512    160    
16     32     
144    784    
-800   880    
-144   -2144  
-816   -448   
-304   -224   
384    336    
1200   112    
-768   336    
-48    -96    
-608   416    
720    -240   
-560   160    
224    -96    
-352   64     
16     -112   
496    -48    
-480   -160   
304    -304   
-288   128    
80     -1136  
656    -80    
-1120  -1184  
256    -528   
-16    -272   
-64    16     
688    112    
-656   0      
-80    80     
80     -48    
0      16     
-224   176    
48     64     
-272   -256   
176    -176   
64     -128   
32     208    
416    304    
-288   208    
32     160    
-144   112    
544    64     
0      144    
-224   -240   
32     112    
48     -48    
208    64     
112    -240   
-336   96     
752    336    
-208   176    
64     -208   
-448   -256   
272    -16    
352    960    
-848   480    
352    -144   
-96    272    
496    -48    
-288   256    
320    -32    
64     192    
0      208    
16     -128   
48     64     
-144   -592   
192    288    
-80    -720   
48     160    
64     -240   
-272   -432   
128    -32    
32     -48    
-48    128    
368    96     
-112   0      
-64    192    
80     112    
48     240    
-48    -240   
64     64     
32     416    
-16    -240   
-544   -1040  
2096   464    
-720   944    
-352   0      
256    336    
-688   80     
96     -160   
768    64     
32     -64    
-640   224    
240    -512   
224    192    
176    -672   
-208   224    
-16    -224   
288    -112   
-112   -736   
192    432    
-256   -128   
-48    0      
176    112    
-432   -336   
1072   -240   
-384   -112   
-544   48     
704    -64    
128    -176   
-192   176    
-256   304    
192    -528   
-96    128    
240    32     
-160   384    
224    64     
128    -16    
80     112    
-272   -256   
272    96     
32     -464   
-112   80     
48     -48    
80     112    
32     -128   
128    64     
-304   -16    
272    256    
336    64     
64     144    
-128   32     
16     -752   
1136   -224   
-1376  -48    
1072   -464   
-416   -208   
128    -400   
-176   -240   
480    256    
-176   688    
256    496    
400    64     
-32    -64    
-16    16     
-32    -1104  
-128   -80    
416    -272   
80     -48    
-528   128    
304    -112   
-400   112    
16     -160   
64     -128   
0      144    
976    144    
-1696  80     
1152   -592   
192    -368   
-720   144    
256    -448   
384    176    
208    -528   
-496   -80    
0      96     
-32    -176   
-48    -64    
240    -608   
224    -128   
-400   0      
304    0      
80     -1280  
-176   64     
160    -64    
-64    64     
192    16     
-1184  48     
1104   0      
-640   32     
-144   -192   
688    80     
-816   -288   
16     224    
400    32     
0      -176   
-176   16     
-240   -640   
160    -352   
416    -32    
64     -208   
-32    48     
-384   304    
192    -128   
48     -144   
-144   0      
-224   304    
704    -208   
-32    64     
192    -48    
-304   288    
256    -160   
144    -496   
544    496    
-1744  -240   
1712   -1872  
192    112    
-192   416    
-960   112    
160    208    
208    -192   
976    832    
-304   -192   
-512   64     
-128   64     
400    -32    
-16    -32    
208    304    
-304   48     
-16    -1296  
64     144    
240    208    
64     -96    
-560   -704   
32     -32    
176    640    
288    480    
-1056  -288   
128    -944   
32     -160   
192    -496   
48     -688   
-240   -656   
96     464    
-16    -720   
208    96     
-192   -80    
-96    432    
304    432    
64     192    
16     32     
-128   -16    
-624   -800   
144    48     
-80    480    
-144   -224   
160    32     
-160   272    
272    -992   
128    -832   
48     80     
-32    96     
-160   672    
-32    96     
160    128    
-336   208    
560    624    
-64    816    
-176   1040   
400    -176   
64     -720   
432    352    
192    -224   
-80    64     
96     0      
16     336    
-96    112    
160    -304   
80     -32    
224    64     
-224   -48    
-48    176    
0      128    
-112   128    
-368   -48    
48     -112   
112    80     
16     -128   
176    128    
-96    -80    
-624   -16    
-384   -160   
96     -256   
-112   16     
-80    144    
-128   -144   
464    -768   
-160   32     
512    -256   
-592   -144   
208    128    
-128   -144   
-128   -80    
-112   224    
-416   48     
-352   0      
144    -176   
-272   112    
112    176    
-464   224    
-48    64     
272    -288   
-112   336    
0      240    
-224   80     
80     368    
-144   208    
144    -384   
512    -80    
-416   -192   
-224   128    
368    368    
-80    368    
-352   64     
-64    -288   
-128   80     
-1056  128    
-160   272    
-16    -16    
112    -32    
-176   -96    
112    320    
0      16     
224    880    
-240   816    
320    192    
-240   144    
-144   0      
-32    32     
272    0      
128    -64    
-64    -112   
-176   176    
544    -320   
-544   496    
736    -416   
-2976  -208   
944    -32    
-176   256    
-192   -288   
-240   256    
-144   -16    
-16    128    
288    576    
272    16     
-352   352    
-400   -432   
176    -368   
-592   -448   
-176   128    
-288   192    
128    -192   
320    448    
-336   -576   
-144   192    
32     -64    
-640   400    
2400   -272   
-1600  -1120  
1296   1152   
-704   -320   
80     -480   
960    480    
-1328  928    
320    448    
176    48     
144    -64    
-144   144    
-304   -304   
128    -288   
400    192    
-240   112    
16     -64    
-64    -32    
-48    32     
256    -368   
-208   48     
-32    -480   
352    320    
-256   0      
-704   -176   
656    640    
-960   288    
-48    -272   
-240   240    
368    96     
192    -160   
-192   64     
-96    -48    
-368   16     
160    -192   
704    -512   
-112   160    
496    -288   
-544   0      
-336   -96    
-16    -16    
192    176    
-64    80     
160    64     
-64    160    
-48    -64    
-96    16     
-112   80     
432    448    
784    4128   
-1584  1680   
352    384    
1712   -608   
-496   80     
-880   0      
-112   288    
432    16     
64     16     
304    -64    
48     224    
-240   32     
272    192    
-80    -80    
32     192    
32     64     
-496   64     
32     96     
-64    -368   
928    -832   
-464   -160   
160    112    
-80    192    
-208   0      
-400   -64    
784    224    
-496   -272   
-224   448    
192    -96    
128    112    
96     -160   
-288   32     
32     208    
416    288    
-688   -192   
304    64     
-208   -80    
480    336    
0      -112   
-912   144    
592    80     
-96    -48    
96     -96    
-144   -160   
-592   -192   
544    -112   
-640   80     
464    240    
-592   0      
-48    0      
208    32     
-192   48     
464    320    
544    -176   
-624   -96    
480    16     
32     416    
-208   272    
96     80     
-48    -64    
-272   128    
-64    240    
176    32     
0      96     
-112   144    
48     48     
400    288    
-240   656    
464    704    
-160   -48    
-96    112    
96     16     
-96    304    
-80    80     
96     80     
128    112    
-128   -208   
80     -32    
192    576    
32     448    
-96    -96    
144    -2032  
-1648  1792   
1792   240    
-704   176    
192    0      
64     -64    
-304   -544   
-96    96     
528    544    
80     176    
-400   -400   
-96    416    
192    64     
256    -80    
-384   480    
112    64     
-288   32     
352    160    
256    96     
-240   80     
-512   -512   
912    -608   
-416   480    
320    -256   
-176   80     
-320   112    
160    -80    
480    -192   
-80    -912   
-96    288    
-32    0      
112    96     
80     176    
144    -32    
-352   -48    
272    -64    
0      -64    
-256   -176   
448    -208   
-112   64     
192    144    
-144   -192   
128    16     
-192   -1056  
288    -96    
-96    160    
192    96     
-208   256    
208    16     
-272   -80    
1424   -864   
-3488  1584   
-128   688    
1632   -256   
-1248  -192   
160    -64    
480    432    
-80    288    
-32    176    
-16    32     
208    96     
-64    -16    
144    192    
-256   -240   
480    320    
-672   -64    
368    176    
-80    80     
176    -48    
64     -384   
-256   112    
656    336    
-1648  592    
896    192    
-96    528    
-544   -1104  
304    16     
-160   -352   
-128   256    
-16    -208   
64     176    
224    -304   
400    272    
-416   64     
272    192    
-288   -16    
-144   16     
384    432    
-496   -64    
368    -16    
48     -400   
-112   16     
64     -592   
-400   720    
-288   -320   
240    288    
16     208    
-64    -592   
-496   448    
560    -32    
-960   352    
224    -352   
-96    -80    
288    -336   
128    704    
-448   -80    
-688   336    
432    112    
480    -336   
-288   32     
224    896    
448    -96    
-208   240    
-80    128    
128    -432   
80     256    
288    -864   
-240   256    
320    -240   
-240   -16    
-80    32     
-208   2160   
928    -320   
-880   -528   
-480   192    
1344   560    
-144   752    
-960   208    
544    1840   
-256   784    
-96    160    
496    -224   
-432   272    
192    -272   
-112   -208   
320    -464   
64     -80    
-464   -272   
304    112    
96     272    
-16    -528   
0      -208   
48     96     
-112   -1840  
-64    400    
480    -1088  
-48    1040   
384    432    
-368   -304   
272    -416   
80     -48    
80     -64    
-288   -176   
192    320    
80     1344   
640    352    
-208   -32    
-384   -240   
-80    -832   
240    624    
144    -176   
-144   -16    
-128   -224   
112    208    
272    528    
-352   32     
272    -48    
-224   -768   
-16    208    
256    576    
-176   48     
-272   -560   
544    -592   
-832   736    
416    -336   
-576   -288   
64     -480   
-240   64     
-128   1584   
304    1280   
16     -144   
176    -720   
-208   288    
128    -496   
144    -384   
160    -256   
-224   128    
-352   128    
144    32     
-80    0      
160    -112   
224    -96    
-96    144    
-32    -48    
80     -816   
144    224    
-112   -48    
0      480    
-64    448    
-144   96     
256    -80    
-48    -96    
-544   496    
784    -496   
-1392  96     
464    -352   
144    -352   
320    -336   
-160   -496   
496    -1920  
192    -208   
256    -336   
144    64     
0      176    
-64    -32    
128    -112   
-48    -288   
-160   48     
144    368    
80     160    
-192   144    
-448   -512   
976    -1232  
-416   576    
464    -464   
-240   -160   
-256   -592   
-96    448    
368    112    
336    -528   
-80    96     
-496   176    
112    112    
656    -288   
-432   272    
-160   160    
-928   160    
272    -208   
416    -16    
-112   -208   
-32    144    
-32    -608   
192    272    
-48    -48    
80     272    
-112   240    
-176   -32    
272    112    
64     -80    
-336   160    
112    544    
1632   1152   
-2112  896    
80     96     
704    -528   
-976   352    
688    -960   
-384   192    
112    -336   
-416   -528   
400    -144   
-496   -240   
0      16     
224    -48    
-144   -240   
-464   -208   
128    -32    
368    -288   
-80    -192   
240    -528   
-48    224    
16     -336   
384    1088   
-336   -1168  
-704   208    
144    -32    
432    144    
-688   368    
-144   288    
768    -400   
-752   144    
-592   48     
-80    -352   
-240   144    
352    -16    
32     -80    
-672   48     
-320   -80    
-192   144    
-720   80     
-32    192    
-64    48     
-128   -176   
800    592    
-112   -208   
256    96     
-432   304    
-864   -64    
688    512    
960    -112   
48     -448   
-1024  -448   
480    80     
160    -48    
-192   176    
-528   96     
-432   -624   
128    -528   
-64    80     
-800   -288   
-704   336    
784    224    
144    16     
-272   -160   
-48    -176   
176    112    
288    -128   
-848   336    
560    48     
-320   160    
-352   -240   
1104   -1040  
288    -1584  
-64    1584   
864    544    
-800   96     
-80    240    
448    16     
288    -64    
-432   -160   
176    160    
448    -32    
-176   208    
-240   320    
64     -48    
-160   80     
96     -16    
96     112    
-544   32     
-208   -144   
208    672    
16     64     
-736   64     
496    256    
64     -96    
432    240    
-496   96     
240    -32    
-336   -208   
-128   -64    
16     112    
32     96     
224    96     
-448   112    
320    -112   
-208   80     
-368   16     
48     224    
688    144    
-736   160    
592    304    
-352   -80    
144    -80    
336    -32    
-176   208    
-64    256    
-128   448    
272    368    
-416   288    
128    -128   
-272   -272   
-48    -272   
-48    -400   
704    -352   
112    -96    
-96    0      
-64    112    
-80    320    
-448   288    
352    -192   
-192   -224   
-256   -16    
224    48     
-96    -80    
-64    80     
-80    80     
192    64     
-1008  192    
-352   -1520  
48     -48    
96     -144   
-160   -16    
-384   288    
320    80     
-80    -192   
128    -32    
-144   -160   
-144   128    
-112   16     
80     -32    
-64    -80    
64     16     
-864   -2624  
-256   928    
1456   96     
-1408  288    
880    80     
-144   -224   
-144   176    
176    496    
-672   1008   
368    -384   
-128   -112   
-96    64     
32     48     
64     336    
-448   304    
512    -384   
-352   448    
32     -80    
16     -64    
80     48     
336    1072   
-1120  -16    
352    128    
848    272    
-384   -16    
-64    -16    
-592   -416   
720    -512   
-224   256    
144    0      
-128   320    
-96    32     
192    -192   
-16    192    
48     80     
-272   160    
400    16     
-96    176    
16     16     
-272   -48    
80     256    
-304   0      
80     112    
-80    0      
64     224    
160    192    
-336   176    
208    -48    
-96    176    
544    160    
-1664  80     
1904   512    
-464   -48    
-176   48     
240    176    
-80    752    
320    432    
-96    336    
-368   -272   
224    64     
-48    -16    
112    96     
112    48     
112    368    
-464   96     
192    336    
288    16     
-128   32     
-160   128    
-96    48     
-128   -448   
1024   688    
-640   -64    
320    -224   
-320   704    
-384   512    
32     128    
-64    -640   
224    -112   
-112   528    
-160   160    
64     -48    
240    128    
48     320    
-544   208    
-96    112    
528    -48    
48     416    
192    112    
-128   -128   
0      144    
176    96     
144    64     
384    256    
-96    0      
416    224    
496    1696   
-800   544    
-464   672    
544    -224   
-128   208    
208    272    
-208   240    
-112   -256   
64     -288   
384    384    
-944   880    
112    784    
-544   240    
48     16     
96     48     
80     224    
-160   240    
-112   304    
-64    48     
-96    1120   
480    48     
-64    128    
-64    672    
-256   -400   
-48    -352   
1568   -1328  
144    -448   
96     1264   
-48    1232   
-768   816    
560    -48    
160    -128   
-80    560    
-624   -1168  
208    672    
240    -144   
-16    -336   
32     144    
-288   -1568  
272    544    
-208   160    
96     -224   
-32    -192   
16     -464   
-16    784    
-64    160    
384    224    
256    48     
-560   -704   
-224   -848   
32     384    
-432   -1040  
736    224    
-16    -112   
-304   -320   
0      192    
224    -464   
128    -160   
-144   -320   
80     -960   
-64    144    
80     320    
0      352    
-112   -240   
-112   -192   
544    656    
-352   -624   
160    -288   
144    112    
96     -224   
96     -2960  
240    944    
-208   -880   
-48    96     
-240   -592   
288    -480   
-352   -704   
160    -304   
-336   -464   
528    -336   
176    288    
-32    -304   
-272   -128   
80     -528   
64     112    
176    -848   
-48    16     
16     -80    
-32    272    
208    400    
-368   144    
160    -64    
464    256    
-176   -64    
512    -224   
-144   256    
128    -256   
0      96     
-48    -848   
192    -560   
32     -480   
32     -800   
192    -272   
-32    -128   
-80    -112   
-400   -160   
480    -368   
-496   672    
32     832    
-64    720    
-48    896    
112    32     
-288   -208   
-32    -768   
320    432    
96     32     
-256   96     
-144   224    
128    -112   
32     192    
160    -208   
-16    -272   
-96    -96    
96     272    
224    -496   
-160   -672   
16     -800   
-336   160    
144    -1328  
272    -144   
48     624    
-368   -160   
-64    96     
176    -272   
176    -304   
-176   32     
-64    240    
160    -400   
112    -1664  
48     -288   
-16    -1040  
128    496    
240    304    
-64    -16    
80     -80    
-32    -240   
-16    -640   
-32    240    
64     192    
48     384    
416    -48    
-32    -224   
-1472  -160   
208    -304   
-1008  -1248  
1408   -1456  
272    -240   
-480   -288   
272    -16    
0      96     
-32    48     
480    336    
-352   144    
272    -336   
16     -48    
-16    -48    
-64    -128   
-128   112    
416    -48    
-432   -48    
416    -240   
-144   32     
-96    -16    
48     96     
176    144    
-48    96     
-464   -1040  
272    128    
704    -304   
-1136  -64    
944    176    
-48    -16    
-240   0      
256    -544   
-560   224    
480    -256   
-16    32     
0      -144   
-512   -32    
416    -560   
480    48     
-96    224    
-336   -96    
144    -272   
-320   208    
-368   112    
304    144    
-1456  224    
864    -384   
-800   176    
80     -384   
432    -480   
448    -112   
16     -720   
240    -1504  
496    80     
-448   80     
208    320    
48     208    
-352   -144   
112    -80    
192    336    
80     64     
336    432    
-624   0      
-608   80     
-208   0      
336    -192   
112    -160   
-624   -384   
432    32     
368    -480   
-832   64     
48     -112   
384    -1600  
-2544  -2272  
128    -176   
176    768    
336    176    
-400   -112   
-496   -48    
-240   -32    
-560   -224   
736    160    
640    -352   
-144   128    
-176   -768   
128    144    
208    -48    
0      288    
-272   -96    
-16    208    
-208   -160   
-208   -272   
784    -1232  
-736   -128   
592    -64    
-656   -16    
528    112    
-16    -192   
-512   -80    
960    -816   
-544   -208   
208    -16    
-32    176    
192    -16    
32     112    
32     16     
-240   -64    
336    -32    
-192   -256   
48     96     
672    -32    
-96    128    
256    -192   
-176   144    
464    80     
-112   -80    
240    -112   
-80    432    
-192   272    
96     144    
96     16     
-288   16     
240    128    
-288   -48    
544    896    
-752   64     
192    -384   
-384   -448   
-336   80     
112    -208   
-176   16     
112    384    
240    96     
-128   -112   
-224   -32    
32     32     
128    128    
-96    272    
80     -64    
-16    208    
-512   -432   
-160   -416   
160    -736   
-160   -48    
16     112    
-32    368    
192    -48    
-368   0      
-160   0      
-16    -64    
0      -864   
-688   -336   
-96    -80    
-304   -48    
48     1856   
1760   -752   
-1888  368    
640    0      
-16    336    
240    -432   
-320   -32    
0      128    
-64    -80    
112    144    
96     32     
-192   320    
-1584  -48    
304    224    
-64    240    
0      304    
-288   -384   
-64    -96    
160    -192   
-96    -64    
512    496    
-560   1344   
64     -64    
-208   -464   
0      -80    
0      400    
-128   304    
-304   -192   
64     416    
-608   16     
16     64     
32     -32    
176    160    
-256   80     
0      64     
176    -64    
-224   -480   
-160   -144   
16     -144   
32     144    
-112   464    
-144   -48    
96     -64    
16     272    
-224   -32    
-352   304    
128    192    
176    -272   
208    208    
-640   608    
-1296  1056   
3280   -928   
-752   32     
-1520  512    
1104   -80    
-464   208    
-144   -1360  
352    -192   
-128   576    
-768   256    
128    160    
384    -16    
-400   192    
96     288    
384    80     
-560   -96    
-240   -304   
256    -544   
-320   -1024  
-224   -624   
224    288    
944    16     
-2560  -32    
720    -176   
960    -192   
-976   -720   
64     -1072  
176    -560   
-192   -240   
-112   -400   
96     128    
-32    224    
64     240    
-224   96     
112    -432   
-256   -112   
-32    -16    
80     -736   
-480   -976   
112    -352   
64     384    
-528   288    
224    128    
-448   800    
512    880    
96     1680   
320    432    
-240   1120   
768    976    
-656   480    
-160   -480   
576    496    
-160   704    
-400   272    
736    -240   
112    544    
464    880    
-608   944    
-368   704    
464    80     
-576   496    
528    144    
-176   176    
176    -336   
-128   640    
-80    64     
-144   272    
496    432    
-368   960    
-528   -96    
-256   -1392  
2240   -1424  
288    -384   
-304   1488   
192    992    
-624   -256   
432    -736   
80     176    
-160   1392   
-544   -192   
-352   -64    
448    320    
-144   16     
16     736    
0      176    
-128   192    
-32    464    
192    32     
-16    -256   
64     16     
-64    544    
16     -112   
48     -112   
-112   416    
576    448    
-672   448    
592    352    
192    496    
176    1264   
-80    -480   
-224   -400   
144    16     
288    304    
-272   -144   
128    -64    
32     208    
-160   288    
208    640    
32     944    
-320   -128   
-96    -384   
432    96     
-32    128    
-80    176    
304    512    
208    1216   
-192   272    
384    0      
-32    -560   
-16    -160   
0      560    
608    544    
-1232  32     
400    192    
672    -160   
-736   -224   
160    768    
608    400    
-128   -896   
-352   -976   
96     -480   
-144   16     
160    400    
144    288    
-288   48     
112    -32    
0      -112   
-80    192    
192    432    
256    240    
-144   64     
176    -16    
-192   -384   
-16    -480   
-112   96     
80     -128   
80     -80    
32     800    
64     160    
-48    -304   
48     -208   
-672   256    
1024   -336   
-1008  16     
944    -992   
-272   128    
48     32     
-80    -496   
112    176    
-288   368    
-32    320    
352    -32    
-192   112    
80     16     
160    96     
176    224    
112    608    
144    864    
-352   720    
-80    240    
160    -16    
592    -64    
-864   832    
672    -544   
-672   80     
496    -1904  
-336   16     
272    -352   
-32    32     
16     208    
272    0      
-80    352    
-208   32     
64     48     
192    0      
-224   0      
368    -16    
-272   112    
320    -288   
-464   400    
672    -960   
-336   208    
-16    16     
48     144    
-80    176    
336    240    
-416   16     
-160   112    
432    16     
-288   -64    
-880   -1824  
3040   544    
1232   64     
-1840  96     
688    -272   
576    -320   
-656   -272   
-80    -2896  
832    128    
-752   -64    
48     112    
288    144    
32     208    
80     144    
192    208    
-288   -128   
256    -16    
48     176    
-272   48     
-32    -112   
224    -272   
-112   160    
-608   -592   
1696   -144   
144    544    
-1136  -16    
-192   384    
1072   112    
-816   160    
272    352    
32     -16    
-32    -80    
0      112    
-32    -32    
400    128    
-976   -496   
576    -48    
16     -304   
-336   208    
368    208    
-272   32     
32     128    
272    352    
-256   -288   
-352   480    
1520   -176   
-432   144    
544    144    
-240   -384   
128    176    
528    -80    
384    80     
-96    128    
-272   416    
240    -48    
352    400    
-144   -336   
160    -64    
672    608    
-304   -48    
-144   -160   
464    64     
80     240    
112    -256   
-160   176    
-80    -288   
800    -96    
-208   -112   
304    80     
272    -16    
-416   -2160  
-1216  1264   
2480   -464   
-1744  496    
208    -272   
208    -1280  
0      384    
592    -1664  
-256   464    
-576   176    
-16    208    
800    16     
-192   -160   
32     -1776  
-416   224    
496    -208   
-416   192    
368    -576   
-304   -304   
448    256    
-624   272    
208    400    
400    -448   
-544   -96    
752    -1200  
-288   -48    
144    320    
32     48     
-192   -192   
528    -320   
-336   -352   
240    -16    
-272   0      
224    -256   
16     -128   
-80    0      
128    -192   
96     -736   
304    -512   
96     -592   
96     112    
16     128    
-96    320    
128    32     
-256   -48    
480    -176   
112    96     
-192   0      
-96    -320   
80     -160   
64     -128   
-64    -80    
80     -752   
-512   112    
656    512    
-704   1168   
624    -1696  
-224   -640   
144    160    
224    320    
16     -176   
80     0      
-96    -16    
0      48     
-48    -224   
-80    -304   
-304   -32    
320    -48    
96     0      
-16    -80    
-32    -48    
-16    112    
160    -512   
32     208    
352    784    
-256   288    
464    -768   
-400   -480   
112    240    
-208   944    
304    112    
-624   -1072  
960    -832   
-1104  320    
304    -1296  
240    256    
-16    80     
464    1280   
-432   800    
288    -400   
-272   448    
160    -256   
32     -272   
-32    96     
-176   -192   
160    112    
-336   224    
-32    -96    
-720   -224   
64     -112   
-80    64     
-160   16     
384    464    
160    -832   
-672   -1008  
112    -400   
0      144    
416    -112   
-368   -608   
-144   432    
-208   416    
-160   -336   
192    -64    
16     -448   
0      -32    
176    -32    
240    -32    
48     192    
-64    -160   
-336   16     
304    -848   
64     -384   
-352   400    
48     144    
32     336    
-80    -304   
128    -352   
-64    80     
160    -112   
144    0      
-128   208    
-608   -1248  
2496   -784   
-144   768    
-1248  -992   
848    -1344  
-224   0      
-416   -784   
752    -176   
-320   336    
-336   -544   
-48    560    
400    -192   
-176   144    
-112   -208   
-64    208    
-272   -224   
48     176    
-64    256    
-464   32     
-304   -16    
128    240    
-592   -736   
208    -528   
-288   -160   
-448   -352   
688    -528   
-320   -480   
16     464    
-496   -1168  
-368   -992   
128    528    
272    1008   
-80    -240   
-512   -656   
80     -320   
-880   -448   
240    64     
-512   32     
480    -288   
-48    0      
-432   0      
80     64     
0      -512   
-272   -288   
464    192    
240    -1088  
-496   -656   
448    640    
-1744  720    
-64    -320   
-224   -752   
-336   -688   
272    -352   
-352   -48    
-160   -352   
-1216  512    
-16    -688   
-560   -912   
16     -464   
224    -96    
-768   -288   
272    -16    
-208   -160   
208    -480   
-144   16     
48     256    
176    240    
384    544    
-112   592    
-512   224    
208    224    
-336   2128   
1040   96     
-1584  -1008  
112    -1024  
816    416    
224    640    
208    1216   
-800   1856   
16     -656   
448    -144   
176    32     
-464   720    
-48    496    
80     -608   
592    96     
-192   96     
-144   352    
144    -64    
416    128    
32     -704   
-384   -384   
-16    0      
192    -64    
-128   592    
256    400    
-304   -640   
-528   -480   
176    80     
-384   -416   
240    176    
-432   48     
-144   352    
240    -112   
-320   240    
176    608    
-32    384    
64     -96    
144    464    
32     576    
192    592    
-16    192    
16     176    
-48    -144   
-528   -224   
128    -432   
-176   -48    
0      -144   
-736   -736   
416    64     
-16    112    
-304   -576   
624    -368   
-752   240    
-160   176    
448    320    
-352   -48    
272    -464   
-176   -464   
224    -112   
64     48     
-304   -32    
288    112    
16     -48    
-304   -240   
64     0      
-32    -80    
48     -96    
-208   -656   
-16    -464   
-48    16     
240    -320   
-48    -48    
-112   -96    
-176   208    
192    128    
-208   80     
352    -64    
-240   -48    
-112   -32    
176    176    
-256   -1920  
272    -16    
0      80     
-224   -48    
368    144    
-32    128    
-384   64     
-160   272    
512    352    
192    48     
-352   -64    
-160   112    
96     32     
288    208    
-288   400    
-80    -144   
512    -240   
-352   192    
208    352    
240    240    
-480   -528   
304    -1024  
-432   480    
672    176    
-224   112    
-288   272    
-32    -320   
32     208    
272    -160   
-32    112    
-128   112    
-224   0      
352    -16    
160    112    
-224   48     
48     192    
-112   32     
-256   144    
240    96     
-416   16     
208    48     
48     80     
-64    144    
48     16     
128    272    
144    -16    
-496   240    
672    32     
-432   80     
80     256    
128    2272   
368    272    
-224   128    
-48    -368   
-272   336    
464    -16    
-160   -16    
256    -96    
-240   16     
-112   192    
64     112    
-256   160    
432    48     
-192   -64    
-256   -64    
336    176    
-96    80     
-80    192    
320    32     
-128   -672   
-160   144    
208    96     
-1632  560    
1392   112    
-560   -464   
-1648  256    
1792   48     
-736   -288   
32     16     
400    224    
-192   64     
160    64     
128    176    
-208   -192   
-128   -912   
-368   96     
352    16     
-48    176    
-48    -192   
304    -160   
192    64     
-96    -48    
608    592    
736    -32    
-944   48     
1040   -16    
-384   352    
-368   752    
-208   688    
512    -448   
-48    -304   
416    160    
-160   512    
-48    64     
256    304    
256    -256   
-528   496    
512    352    
-448   256    
336    288    
-256   112    
-144   48     
304    176    
-112   0      
48     -128   
-16    224    
752    -2656  
-144   96     
192    144    
-352   -224   
2224   -208   
-2896  -896   
1456   768    
816    16     
-416   -144   
-112   64     
-288   256    
832    -16    
-176   -160   
400    -96    
144    -48    
-368   -768   
416    112    
-80    -64    
64     80     
-48    288    
176    32     
-192   0      
128    64     
496    1376   
240    208    
-528   -240   
192    -272   
-304   96     
-320   320    
912    256    
-464   368    
160    -48    
48     -1296  
-128   -224   
384    -16    
-304   224    
-112   -192   
-96    16     
272    -64    
80     224    
32     1008   
608    -48    
-432   -16    
128    -144   
112    144    
0      -576   
240    16     
-144   -1424  
-48    272    
192    -800   
-352   224    
448    176    
-96    -48    
144    352    
272    352    
-416   -304   
480    -624   
-448   608    
448    -304   
-80    416    
32     352    
800    848    
432    -416   
16     688    
240    704    
-112   224    
80     -128   
16     -112   
64     160    
0      64     
16     -256   
192    -160   
96     176    
-128   -80    
16     -352   
-112   -240   
64     544    
48     -80    
-208   752    
144    32     
-288   -16    
352    64     
304    -80    
-208   64     
-80    -80    
-32    -1568  
352    -1680  
256    64     
16     128    
32     320    
-160   80     
496    448    
-304   560    
144    144    
160    16     
16     -240   
48     192    
0      -176   
224    32     
-272   288    
-80    -624   
384    -560   
-48    -1552  
-64    -208   
-48    -16    
288    464    
-80    352    
48     -224   
864    -704   
-720   272    
368    224    
-32    384    
128    -336   
192    -240   
-176   -192   
16     -64    
272    192    
0      -160   
144    -224   
-192   -240   
-96    32     
-64    224    
288    32     
208    336    
-144   368    
-32    -16    
512    -144   
-48    -80    
-16    -320   
-512   64     
-192   208    
-16    48     
416    -256   
-64    -64    
-160   -880   
1664   624    
-2400  528    
-320   208    
1392   -256   
-880   -512   
-576   -704   
320    -272   
-1136  -1664  
176    -1008  
352    -144   
144    720    
-576   -64    
272    -480   
48     -128   
-32    -320   
48     -112   
48     -304   
-80    688    
-32    -144   
192    224    
16     -240   
-864   384    
2384   -304   
-944   768    
128    416    
416    560    
-320   1232   
304    1312   
112    -64    
-304   -1440  
448    64     
64     -720   
16     512    
-32    336    
0      432    
240    -112   
-208   144    
32     -672   
-176   -640   
-128   272    
512    224    
96     32     
80     208    
-592   -128   
400    -176   
-80    -976   
-592   -912   
-512   -2176  
-288   -1824  
848    -336   
-912   288    
400    0      
144    -272   
-80    48     
-304   -480   
704    -592   
-784   400    
128    -432   
-192   -384   
-176   -256   
208    -1024  
16     64     
512    240    
-176   -448   
-416   80     
368    -432   
-720   112    
448    208    
-432   -384   
-128   64     
320    -672   
208    -1440  
384    272    
576    464    
-1024  256    
48     1088   
416    -16    
-224   -416   
240    -80    
208    -400   
-352   -192   
80     -96    
-96    -112   
288    16     
-112   160    
80     -80    
-224   64     
0      -480   
-368   -160   
688    -640   
-208   1168   
320    256    
-80    352    
-160   -288   
-560   -48    
768    176    
-112   -64    
-32    -112   
-32    144    
48     96     
-64    -176   
16     -64    
80     64     
0      592    
-768   0      
-224   128    
-752   -96    
320    -112   
-496   -96    
352    240    
80     32     
-464   -80    
16     -16    
-592   -112   
-112   96     
256    96     
-48    -16    
-96    -192   
48     -16    
-272   -208   
288    48     
-272   -592   
576    -672   
-128   336    
-160   144    
400    48     
-592   0      
-160   -256   
112    128    
-160   0      
224    -112   
-448   192    
-16    -144   
160    112    
-288   64     
32     -32    
144    -496   
-160   256    
32     -288   
336    -608   
-400   400    
-16    -144   
224    224    
-32    384    
48     224    
-480   -208   
-128   -480   
-96    96     
80     192    
32     -16    
48     64     
192    -2288  
-1936  1648   
1744   32     
-672   384    
448    -48    
-32    -64    
-128   80     
-528   128    
368    336    
64     -144   
-272   144    
-352   32     
176    48     
432    16     
-544   320    
96     -416   
-16    224    
-160   80     
-32    32     
192    -48    
-32    480    
-608   -416   
-352   256    
1200   192    
-624   -208   
0      384    
-1040  -64    
144    128    
304    -320   
-144   192    
-208   80     
-112   224    
144    32     
208    -160   
-144   64     
-80    112    
32     224    
80     48     
160    -80    
-368   0      
112    144    
-128   16     
48     144    
-176   -128   
320    128    
-368   16     
-16    208    
112    32     
16     16     
-144   112    
-1920  -464   
4016   848    
-1056  -320   
-1568  -16    
592    160    
160    48     
240    32     
-656   -544   
240    96     
-256   0      
224    144    
176    -16    
0      112    
-368   -64    
464    192    
48     16     
-304   64     
96     -32    
16     -32    
64     -144   
32     112    
-272   -560   
-624   848    
832    -208   
-16    480    
208    288    
224    448    
-32    112    
-464   -48    
400    368    
224    -80    
-80    176    
-16    -64    
-112   208    
-64    -96    
512    64     
-112   64     
-96    64     
32     272    
224    128    
160    -16    
-192   -176   
464    224    
272    -144   
-176   176    
304    192    
-816   80     
336    64     
80     304    
-688   192    
192    -48    
-224   -96    
576    32     
64     112    
-224   -672   
-48    320    
240    96     
-464   -176   
400    112    
-144   48     
-128   -48    
80     112    
-64    16     
16     144    
0      -48    
16     336    
432    -128   
-352   176    
176    176    
368    992    
96     -560   
-2272  -656   
1520   -160   
544    -64    
-496   208    
-272   1216   
-64    160    
16     208    
272    32     
-128   -32    
144    -112   
-192   240    
560    -336   
-272   432    
208    -112   
-48    448    
240    -112   
-208   224    
400    -128   
-208   -912   
64     -800   
-112   -48    
64     336    
-384   32     
240    80     
-176   48     
144    240    
0      -176   
-128   224    
320    592    
-448   352    
160    -416   
80     -336   
80     272    
-160   240    
-208   144    
272    -432   
-224   -384   
-256   -160   
80     32     
-32    -944   
256    288    
16     -112   
-32    -320   
-160   160    
16     656    
448    432    
-480   912    
400    912    
-112   -304   
96     -96    
672    1152   
-1280  224    
416    -496   
-112   -112   
-368   -320   
400    48     
-96    1232   
208    -1392  
-160   -368   
352    1024   
32     -192   
-112   160    
208    0      
-192   -32    
96     16     
96     144    
144    32     
-80    496    
64     144    
128    -448   
0      48     
48     208    
-128   128    
-32    0      
96     -48    
-48    432    
160    80     
-416   144    
272    0      
80     -256   
96     240    
-176   -320   
-720   -352   
832    224    
48     -32    
-80    -16    
-96    -2464  
384    -320   
192    -80    
272    176    
-368   288    
80     -48    
64     -176   
224    160    
-16    48     
-64    128    
-192   208    
336    160    
192    272    
-144   -176   
224    -304   
-1136  -464   
688    368    
-304   32     
640    -368   
-64    400    
-224   944    
208    400    
-464   -48    
160    -96    
80     -32    
64     -128   
-224   80     
-96    336    
64     -240   
208    -16    
-80    -384   
16     -592   
96     -1568  
416    144    
16     80     
-256   416    
-128   -32    
464    -224   
48     -64    
-32    64     
-304   144    
-16    96     
240    96     
336    -64    
-1760  -192   
1808   -240   
-144   -48    
-912   16     
592    32     
-528   -1408  
-416   624    
272    976    
-592   -1424  
-16    -16    
352    32     
-160   224    
-112   -224   
240    400    
48     -544   
-48    -16    
-64    192    
176    -560   
48     -416   
-64    176    
736    1248   
-1664  -784   
-544   544    
1728   -784   
-720   256    
160    -1616  
48     80     
256    -384   
-624   224    
192    -1360  
-64    -96    
-128   -48    
-288   384    
480    -160   
64     -16    
-832   64     
464    -16    
-224   288    
784    -256   
32     144    
-256   0      
64     240    
-464   32     
-800   -3280  
-608   -1712  
1184   272    
-656   352    
-352   592    
976    -512   
-416   -1744  
-240   272    
112    -1072  
112    -224   
128    -336   
64     416    
-1152  688    
240    -224   
-208   -272   
-240   -2096  
-80    528    
672    -208   
-304   208    
-48    -144   
96     224    
336    -416   
32     -400   
-576   128    
624    48     
240    832    
-672   912    
-1344  -560   
352    -336   
-480   -288   
-48    -80    
1232   448    
-224   -64    
-1072  304    
768    48     
-240   48     
416    -400   
-144   176    
-176   -320   
272    448    
-112   -240   
-64    48     
-224   -176   
-128   16     
384    -96    
-400   -896   
-352   -608   
352    -64    
-112   -64    
640    64     
128    48     
-512   -32    
368    112    
96     -16    
-48    -368   
160    240    
-96    -192   
-464   224    
720    16     
-560   64     
176    -176   
288    80     
208    -320   
-592   -384   
176    -848   
-128   80     
176    64     
-176   96     
288    -80    
-224   -272   
240    -64    
208    0      
-272   -128   
80     -208   
-880   -160   
48     -144   
16     112    
-32    16     
-112   -848   
-1008  -480   
1024   -16    
-320   -192   
-48    80     
144    224    
240    112    
-64    352    
-144   -112   
-320   64     
32     -80    
-544   -112   
224    112    
128    96     
64     -416   
32     -208   
64     -192   
-192   -256   
-112   -576   
208    192    
64     -32    
0      64     
16     16     
-128   224    
64     -176   
16     -128   
48     368    
80     -176   
-64    144    
-528   -1440  
1824   -128   
-976   368    
128    -384   
-144   -416   
0      -160   
-96    96     
304    0      
48     256    
-384   224    
-304   -512   
288    336    
-176   -160   
-48    -240   
16     -352   
128    -80    
-48    -288   
208    304    
-80    384    
-144   -656   
96     48     
176    1504   
160    -48    
-544   -112   
336    -48    
-224   -32    
480    928    
96     -144   
-352   -320   
-48    -64    
48     64     
352    96     
16     240    
0      0      
-144   96     
-480   -144   
-144   64     
384    -160   
-80    -144   
-448   64     
256    112    
272    16     
16     -80    
-384   0      
32     -96    
528    64     
-64    0      
-112   0      
-336   32     
16     128    
608    208    
-2080  -592   
-144   -112   
-32    -304   
-688   -448   
64     128    
656    160    
-224   1120   
-528   736    
336    320    
64     -416   
-176   -64    
-240   -112   
48     64     
32     304    
512    96     
-480   160    
-112   -256   
-144   -112   
-128   -128   
-416   -16    
544    1040   
-560   -416   
-896   -240   
720    -336   
176    -320   
-160   576    
-48    -128   
-128   192    
64     0      
-96    -64    
-144   80     
-208   32     
128    80     
-80    240    
64     -48    
-1616  48     
304    96     
-96    -384   
272    -96    
-272   160    
64     240    
80     80     
-704   224    
-272   -112   
192    640    
704    -112   
-192   -96    
-224   256    
-176   16     
0      -208   
-576   96     
432    1120   
304    -272   
-576   -304   
480    704    
-432   224    
16     -32    
416    -80    
-352   208    
-160   -32    
96     128    
208    48     
-48    0      
-336   -240   
-80    48     
400    -304   
-464   240    
-80    -64    
496    944    
-1040  -112   
-176   2320   
1216   -64    
-1552  48     
-464   -80    
656    336    
688    800    
-464   -128   
-304   160    
-272   -224   
-272   384    
512    144    
-48    288    
-528   -608   
288    48     
272    336    
240    -80    
-224   96     
112    -112   
144    144    
-256   -352   
96     0      
-176   -192   
176    480    
128    800    
528    544    
-576   288    
256    304    
-576   -704   
32     -688   
304    -272   
-16    -128   
-96    592    
-208   0      
208    512    
336    832    
-192   432    
-80    608    
160    1200   
-32    256    
32     -336   
-448   176    
208    512    
-16    96     
64     336    
-112   0      
448    1696   
-400   1392   
-192   -80    
192    -416   
96     -16    
-256   160    
-352   32     
848    -560   
-448   -1168  
-480   -448   
256    -144   
32     128    
-48    1472   
112    1472   
-496   -800   
224    -528   
176    64     
-16    -32    
96     -192   
-128   144    
48     192    
272    448    
-192   848    
-96    -208   
160    -32    
-16    48     
256    -64    
-192   -80    
-80    176    
-80    -48    
144    -496   
384    -16    
-96    -48    
-208   208    
144    160    
160    32     
-144   -432   
-64    -64    
-560   336    
224    -16    
144    0      
48     112    
-176   -96    
-192   -256   
160    608    
-224   336    
128    -32    
32     16     
-32    -16    
112    32     
-16    192    
48     80     
0      320    
-176   80     
0      64     
-224   -64    
480    384    
384    272    
-672   -16    
160    0      
-112   208    
304    -16    
-16    208    
-176   688    
-32    -224   
-64    80     
-32    144    
128    -16    
16     -48    
128    160    
-432   336    
0      416    
592    -144   
-560   -768   
-208   -352   
240    80     
256    256    
32     256    
-112   64     
-240   -112   
112    224    
496    32     
-256   144    
-624   0      
624    -128   
-336   -800   
1872   -2112  
-1008  -320   
608    256    
608    352    
-320   48     
16     1504   
1056   1056   
-48    128    
-448   -288   
240    -144   
-16    32     
112    16     
-208   64     
-192   -208   
208    32     
96     -2240  
224    240    
-208   432    
176    576    
160    224    
416    320    
-1776  928    
896    -400   
-416   -768   
-160   -832   
48     -240   
96     448    
-160   240    
0      16     
272    464    
688    -448   
-496   16     
-208   48     
176    -144   
544    288    
-64    112    
-224   -80    
112    224    
256    176    
-80    144    
-48    112    
-96    -208   
864    32     
-672   144    
528    112    
288    864    
400    128    
432    48     
288    592    
-432   0      
272    80     
-352   -144   
32     144    
112    320    
-224   112    
160    432    
-480   144    
192    -288   
-96    0      
144    -16    
32     -96    
-256   112    
0      -2112  
-192   160    
320    176    
-288   64     
-240   -224   
368    144    
384    48     
-464   1760   
1248   3216   
976    -112   
-1808  256    
-160   -640   
848    144    
144    -672   
-448   112    
480    -112   
-368   400    
576    -608   
-320   32     
80     0      
-240   64     
240    144    
-32    64     
144    272    
-432   -48    
112    240    
-256   -128   
816    224    
-912   -128   
144    -96    
768    -240   
224    -32    
-560   -560   
416    192    
-80    -224   
64     0      
176    176    
48     112    
-464   16     
544    -144   
-272   48     
64     -976   
368    64     
128    -288   
-416   96     
224    48     
-464   96     
144    -208   
32     0      
-208   16     
0      48     
-32    -48    
240    -96    
-288   -112   
32     -400   
112    176    
208    64     
-16    208    
-224   32     
32     -32    
-992   -208   
448    -1232  
-464   -656   
224    -176   
-448   -336   
80     384    
416    192    
192    -2864  
-80    -1392  
64     0      
-128   -416   
192    80     
16     144    
-32    -176   
96     176    
-256   0      
80     64     
320    160    
0      -176   
-64    32     
160    -752   
112    32     
80     -80    
-512   -320   
368    -1104  
0      -32    
48     0      
0      -1440  
32     144    
-192   -1872  
-832   592    
1664   -128   
-880   -256   
-272   32     
416    -80    
96     -400   
48     -432   
-384   80     
384    288    
-112   -96    
320    -320   
-240   -112   
48     -464   
144    224    
32     -48    
160    48     
-224   80     
16     0      
192    -352   
-368   -144   
1024   -400   
-656   240    
-48    176    
432    -48    
-336   -272   
96     16     
16     688    
240    48     
-64    -208   
304    -704   
-144   -336   
-32    -48    
368    0      
144    -128   
48     256    
32     -16    
0      -128   
-96    -208   
-48    -128   
192    96     
-112   -32    
352    -16    
32     -224   
-432   -128   
656    -672   
-256   96     
96     -656   
-144   -336   
1712   2592   
-1072  -320   
-1888  -256   
2240   -64    
-976   -368   
16     272    
384    448    
-16    0      
-352   -208   
-96    -144   
96     -64    
-224   -112   
128    112    
224    -16    
-368   304    
432    48     
32     128    
-176   208    
448    112    
-240   -16    
0      -64    
544    1216   
-1008  -928   
-1104  48     
416    800    
448    -272   
-160   -48    
-336   256    
256    -544   
16     -128   
48     -336   
-192   -32    
96     64     
96     -96    
-224   -240   
-112   -96    
16     48     
0      -256   
-192   -144   
144    -96    
-736   176    
-16    -384   
16     32     
-320   -704   
80     112    
288    -688   
-144   48     
384    496    
544    -112   
-752   -160   
-32    640    
496    -128   
-448   288    
80     16     
336    336    
544    -656   
-320   352    
32     432    
-272   -48    
496    144    
32     -160   
-240   -160   
-144   0      
192    0      
64     -160   
-16    224    
-96    -480   
-160   48     
704    -176   
-192   -592   
-208   256    
-480   2640   
528    224    
-544   48     
128    -464   
592    96     
-768   544    
-816   -464   
-64    -832   
224    480    
-112   -240   
-192   -32    
-160   16     
32     -160   
272    128    
16     -208   
-288   256    
-32    560    
-64    -320   
-96    -416   
-96    112    
-176   352    
80     -64    
-176   -640   
-144   -976   
-496   -464   
-80    -128   
192    -64    
64     160    
-112   -368   
-64    352    
-288   -256   
-288   352    
-80    -320   
48     80     
-448   -80    
48     -256   
144    544    
224    1328   
-240   112    
-1024  -320   
384    -208   
128    416    
-16    -16    
-336   -80    
400    704    
256    384    
-288   304    
-80    -432   
32     -80    
96     336    
-464   -736   
624    16     
-480   16     
-64    608    
-560   -528   
80     -1088  
-304   -1440  
496    -1344  
96     848    
64     880    
-400   -320   
-96    -80    
240    32     
64     0      
48     -256   
-288   96     
256    224    
-96    224    
128    192    
48     160    
-272   -80    
-416   -336   
128    -256   
-32    48     
-32    272    
128    560    
384    288    
-144   240    
-480   400    
80     224    
80     -352   
608    -1008  
-512   736    
304    -336   
176    -640   
320    32     
-624   -464   
688    -784   
-48    -128   
96     720    
-80    80     
-272   208    
-80    -48    
352    32     
64     -16    
-16    96     
16     64     
-64    96     
304    160    
-64    32     
224    -320   
-976   96     
256    64     
-256   224    
-32    304    
192    400    
-368   352    
32     -496   
384    -256   
32     576    
-112   64     
-256   -112   
-32    -528   
48     272    
0      -80    
112    208    
-320   160    
80     -32    
-32    288    
-208   0      
-240   0      
160    256    
0      -48    
0      16     
-64    -336   
-224   0      
224    64     
16     80     
-336   -128   
352    -640   
-208   2448   
1584   80     
-752   -272   
64     -304   
1280   336    
-1648  352    
928    -32    
272    16     
-176   -112   
-112   96     
208    96     
-48    80     
-80    32     
-64    256    
464    80     
-384   144    
0      -176   
208    160    
0      16     
-16    192    
-32    128    
-496   416    
1760   -464   
-688   144    
-16    80     
624    160    
-256   160    
176    -272   
-208   224    
-112   48     
-80    96     
192    64     
16     112    
-16    32     
-176   208    
416    0      
-224   64     
320    144    
-144   128    
272    -224   
0      16     
-32    144    
-592   -528   
496    -240   
-32    592    
-544   480    
96     -16    
176    -368   
752    592    
32     240    
-160   224    
336    128    
352    80     
-16    384    
-624   64     
-256   -192   
480    -336   
96     -48    
-512   -128   
-96    96     
48     112    
-112   0      
480    64     
-240   384    
-768   48     
64     336    
1216   -336   
-224   128    
192    16     
704    1184   
-2752  16     
784    1248   
112    352    
-416   176    
1056   112    
-320   0      
-144   -288   
64     -240   
304    304    
-560   64     
704    384    
-112   -192   
-64    160    
-96    0      
-160   240    
608    -16    
-320   80     
0      -48    
192    272    
80     -480   
-80    432    
592    -112   
-784   -1600  
368    352    
0      240    
-544   160    
912    48     
-624   16     
16     272    
32     -32    
288    64     
0      -48    
-160   -16    
320    -176   
-496   80     
832    48     
-368   80     
160    -3296  
112    96     
256    224    
-272   96     
240    144    
272    -112   
64     16     
-352   64     
176    128    
-48    432    
560    64     
-272   128    
-288   -144   
416    -224   
176    416    
128    -512   
-752   288    
624    176    
-208   304    
0      160    
48     -144   
-400   -32    
272    -144   
160    -176   
128    144    
-208   -64    
160    128    
-144   -96    
64     -384   
96     -80    
-64    -416   
-272   96     
16     -272   
288    -80    
-32    176    
0      192    
192    96     
48     304    
-160   352    
-96    272    
144    -112   
256    768    
-240   768    
-544   -1136  
1392   -192   
-928   496    
96     128    
-240   -1472  
-352   -192   
528    96     
96     160    
384    288    
-704   544    
208    -224   
320    -16    
48     256    
-112   32     
-48    416    
272    -208   
32     192    
240    144    
-304   48     
32     -400   
176    128    
176    -1104  
-432   576    
480    -288   
-416   16     
304    336    
240    -112   
-208   448    
-384   48     
96     368    
512    -144   
-16    -112   
-272   -640   
-32    80     
-16    -64    
304    448    
80     192    
64     176    
-416   144    
208    64     
192    -32    
-112   0      
288    96     
-224   96     
112    192    
0      -368   
-80    224    
48     -208   
272    96     
160    32     
-976   -432   
1136   -1504  
144    32     
-112   48     
-192   624    
-96    -16    
288    -192   
320    -16    
-208   -656   
272    -48    
-240   -48    
192    112    
-16    -80    
-16    48     
80     -96    
352    208    
-112   96     
176    304    
240    432    
48     224    
16     -48    
432    576    
-944   -1312  
-1088  -160   
1968   -592   
-1056  -112   
352    736    
-272   -752   
-496   -128   
544    -224   
-144   64     
352    0      
-240   -176   
-144   -64    
224    -368   
-80    0      
-208   -144   
-80    -464   
-144   -576   
-144   -752   
48     -384   
-32    -336   
-80    -272   
192    -496   
256    -960   
-720   -304   
400    112    
-32    -1200  
-416   160    
736    -672   
144    464    
-64    -32    
-240   320    
256    144    
-112   -240   
320    512    
768    496    
336    -304   
400    -192   
48     80     
48     -336   
96     -48    
-16    -352   
-208   -32    
144    -64    
208    -96    
-176   160    
496    96     
-656   -624   
-112   -432   
400    -16    
1104   1216   
-2464  48     
672    -1120  
448    512    
880    880    
-688   1280   
-464   -1056  
80     -1424  
400    560    
96     -464   
-224   -256   
-304   320    
-912   -16    
336    224    
-80    208    
-304   816    
-32    -480   
448    -256   
128    416    
80     -448   
-528   -720   
160    16     
384    480    
336    0      
-912   -416   
128    400    
144    -96    
48     -1648  
-16    -1552  
-464   432    
32     176    
-16    -288   
-160   -480   
64     80     
32     400    
128    304    
480    -704   
-16    128    
-240   400    
176    384    
-112   96     
176    -288   
-368   -32    
64     416    
-704   32     
64     -640   
224    112    
-320   448    
176    160    
-224   -1232  
384    176    
-224   832    
1008   -48    
-432   224    
224    352    
192    112    
-48    160    
240    1600   
192    256    
-384   -1392  
32     -192   
-128   256    
32     -304   
-128   224    
176    -560   
240    -544   
112    -928   
112    -128   
-80    176    
-80    -560   
0      -160   
352    416    
-192   112    
0      80     
-176   -96    
-64    -160   
576    448    
224    896    
-112   32     
-384   -272   
-320   -592   
816    -1568  
560    384    
-144   64     
368    1328   
496    112    
-208   -656   
320    -240   
-512   -144   
-112   -512   
240    -368   
-48    32     
16     0      
-128   -48    
-384   80     
384    -112   
-288   416    
-784   96     
-16    -176   
176    -64    
-208   -96    
240    112    
-192   112    
144    -480   
-112   -48    
-352   144    
-48    -320   
-320   -416   
272    160    
-720   -48    
-368   96     
160    -32    
64     -144   
-224   272    
368    -48    
-272   144    
-1104  288    
-112   -496   
224    -560   
-192   96     
224    48     
96     208    
-320   -64    
112    48     
-48    112    
336    -48    
-400   64     
128    0      
-48    96     
-208   64     
848    784    
-1584  640    
-112   352    
976    -112   
-656   16     
-704   -208   
784    -48    
-320   -464   
-48    208    
144    0      
-48    80     
-176   80     
208    144    
-160   -112   
240    32     
-416   -64    
-32    176    
-528   112    
-16    224    
-112   48     
-320   -192   
-16    -448   
1152   176    
-656   192    
624    -176   
-192   32     
128    96     
0      -32    
112    400    
160    112    
-208   96     
112    32     
-112   96     
-448   -96    
208    80     
352    -64    
-368   128    
80     48     
-576   16     
560    -96    
-288   -208   
-240   16     
224    416    
-1520  64     
208    -208   
1600   -96    
-48    0      
-464   -32    
-800   -432   
400    -176   
160    128    
176    176    
-560   -48    
160    208    
768    368    
-416   384    
-480   384    
-16    352    
560    -16    
384    96     
-368   0      
-400   48     
-432   -240   
512    -48    
-16    192    
-1440  -128   
800    -464   
240    320    
-464   80     
-480   128    
-1136  -2592  
1776   -240   
384    1360   
-1408  -576   
208    48     
560    16     
288    -400   
-768   368    
-160   -176   
368    464    
-592   -80    
-64    112    
400    -128   
-288   320    
-112   80     
160    352    
-160   64     
-176   160    
720    -112   
-368   -192   
-1040  -48    
976    96     
-448   112    
688    -240   
-496   -96    
-448   16     
400    64     
-368   192    
272    -160   
0      144    
-176   -272   
-176   208    
256    -80    
-128   256    
640    144    
-64    128    
-256   -192   
0      80     
32     -48    
-336   144    
-16    160    
0      64     
288    224    
-256   -128   
0      48     
512    0      
-48    144    
0      192    
32     64     
64     -352   
-224   80     
-144   48     
-240   -336   
80     32     
-64    -16    
-288   16     
16     176    
48     -80    
-16    -32    
192    448    
-464   544    
352    192    
-48    -128   
48     -368   
-32    -272   
-160   64     
-256   80     
416    256    
-240   208    
192    80     
320    176    
-96    192    
-16    -32    
-64    -256   
128    64     
128    -112   
-16    112    
-16    64     
0      496    
272    256    
-160   64     
-192   0      
-128   -1776  
-768   512    
1728   192    
-464   304    
-912   304    
656    592    
688    336    
-400   336    
-336   -128   
48     368    
416    352    
16     656    
-112   -160   
-96    -304   
272    432    
-288   576    
-64    -176   
-64    80     
144    16     
-32    -96    
-368   400    
624    -384   
-864   944    
656    -112   
-144   416    
352    192    
-336   -336   
384    160    
-224   80     
-224   64     
192    32     
-80    -160   
128    192    
80     400    
-16    112    
-304   -32    
224    192    
-208   -208   
160    592    
80     16     
-32    -176   
-80    240    
-96    144    
48     352    
-144   -80    
256    208    
80     208    
-80    -1520  
-32    48     
-240   -928   
2464   -960   
-1232  1488   
-224   272    
736    624    
-336   -320   
-256   -1040  
960    -1152  
-560   -1168  
16     -80    
48     704    
80     -256   
256    -80    
-64    -1008  
-64    208    
32     288    
144    -64    
32     -144   
-176   176    
80     144    
80     -16    
144    -720   
-1856  864    
2336   624    
-720   1648   
-576   576    
1072   -416   
-96    320    
-336   144    
160    48     
352    -2176  
-80    240    
-16    80     
-80    192    
304    -656   
80     -256   
96     144    
-208   -16    
-416   -272   
688    -1504  
-304   -592   
-272   -192   
16     384    
-48    -112   
-288   576    
1200   -96    
-816   912    
-480   -272   
992    80     
-320   -32    
16     -144   
-160   112    
880    272    
-240   96     
-272   -224   
80     32     
-688   -288   
1024   -400   
-464   -1280  
144    592    
-16    -416   
-448   176    
448    -1104  
-272   32     
192    224    
-96    144    
-16    48     
512    400    
-304   832    
32     144    
144    0      
-1072  -928   
96     -192   
496    -448   
-1280  -112   
896    -128   
160    -992   
-656   -1312  
-640   96     
192    64     
400    544    
-144   -352   
-448   512    
272    -16    
272    -176   
304    80     
0      -528   
-32    -112   
336    240    
224    880    
-208   -48    
64     -224   
208    -80    
-224   -592   
-672   128    
1056   400    
-640   448    
736    992    
-496   224    
192    -1344  
-272   -528   
160    -16    
64     -32    
48     576    
-32    432    
-96    160    
304    64     
-416   224    
96     976    
64     576    
-64    -512   
608    944    
-256   -48    
-144   -1664  
224    -464   
128    256    
448    -160   
-704   -80    
288    352    
-128   -384   
128    -976   
48     0      
-48    -320   
-464   320    
96     -48    
2352   -896   
-1232  576    
-480   32     
352    592    
112    416    
160    496    
-48    464    
64     -272   
80     352    
240    544    
208    48     
-128   -304   
192    144    
208    -208   
-336   -48    
208    32     
432    -240   
-368   176    
-16    64     
96     96     
272    -240   
-416   -832   
224    -1280  
32     -160   
80     304    
-64    16     
752    2096   
-1904  576    
752    -608   
288    -16    
-272   -48    
-240   -704   
-192   -656   
96     -864   
80     -464   
-16    96     
112    288    
-48    240    
48     32     
-80    -272   
64     -544   
64     160    
224    0      
-288   -96    
128    -64    
48     112    
496    720    
-1200  304    
640    -240   
272    -16    
-624   -80    
480    128    
-256   0      
64     -208   
-128   -624   
400    -112   
-128   16     
-384   256    
240    48     
256    -48    
-64    -48    
-224   -176   
-32    48     
80     -256   
224    -144   
-336   -64    
-800   96     
-176   -192   
-48    64     
32     -720   
80     192    
-64    -576   
-32    272    
112    -64    
80     -16    
176    -240   
-1904  -544   
2176   784    
448    -256   
-1488  16     
288    112    
-208   32     
384    -224   
-496   704    
192    -144   
-80    192    
176    -304   
96     176    
-256   -176   
128    -80    
336    64     
-96    0      
-112   64     
128    -144   
-368   -64    
48     -160   
-112   96     
-576   -688   
144    224    
752    -832   
-432   -400   
-816   -480   
896    0      
-128   -240   
-352   -128   
-352   -32    
304    112    
448    -16    
-160   -80    
-288   -160   
-128   -32    
-224   64     
528    -208   
16     48     
160    -336   
-560   -320   
688    -112   
96     368    
-112   -112   
-304   176    
496    -16    
-864   -272   
480    -48    
1072   528    
0      80     
336    -960   
-976   -144   
672    -224   
128    -112   
208    -208   
-160   384    
-976   352    
-208   352    
576    -80    
-240   -336   
-192   272    
368    -128   
-352   224    
352    48     
-16    16     
-48    -128   
112    144    
-288   -112   
208    0      
-640   32     
800    1344   
-2640  3024   
1216   -192   
-528   -592   
-1792  -544   
1136   320    
-432   160    
-800   -288   
-304   -160   
-160   -32    
96     -256   
-128   112    
256    -160   
-128   112    
-480   -16    
512    176    
-368   112    
-256   32     
176    16     
336    320    
-704   480    
432    416    
224    0      
-608   -48    
288    176    
112    112    
-304   16     
128    -32    
288    144    
-416   -16    
-112   256    
-32    128    
272    -208   
0      -224   
-192   -288   
32     160    
16     128    
-160   48     
-48    -208   
112    -32    
-912   -32    
48     32     
-176   -176   
48     16     
96     -144   
336    96     
-16    96     
-64    288    
400    272    
-432   128    
64     304    
224    112    
-112   -384   
-720   144    
336    -448   
-400   16     
-48    1024   
-112   448    
160    128    
-192   -64    
-48    -32    
192    -16    
480    688    
-880   688    
592    576    
144    736    
192    512    
-16    848    
-176   256    
64     496    
144    112    
64     144    
-16    144    
-96    224    
96     272    
48     208    
80     224    
-16    -224   
-288   -656   
-16    -240   
176    128    
64     224    
-128   1904   
848    -400   
-1104  672    
416    896    
-240   -208   
256    -160   
-304   -368   
32     16     
-224   0      
128    304    
144    -304   
-160   512    
-176   -224   
160    176    
0      -64    
-48    80     
-224   464    
112    -16    
-208   48     
-64    -48    
112    -368   
-992   416    
832    48     
-128   -352   
288    112    
16     96     
-368   528    
208    1248   
-288   224    
-80    -336   
160    256    
-208   448    
16     80     
16     -288   
192    416    
-64    -208   
-128   -32    
-144   384    
288    -16    
64     384    
-80    -16    
-128   192    
0      224    
176    32     
64     -336   
-240   112    
-80    288    
16     176    
-96    -144   
240    48     
-1600  -32    
2176   128    
-592   -624   
-1088  176    
1136   656    
-224   -16    
-368   -32    
768    864    
-208   928    
-320   -832   
112    -352   
-112   384    
-272   -96    
240    -64    
144    144    
-16    -16    
-176   0      
304    -112   
16     608    
-160   -64    
688    1520   
-1312  -640   
-224   848    
608    48     
-544   -112   
352    -688   
-320   -896   
128    -1744  
-528   -992   
304    688    
-96    608    
-112   592    
448    272    
-400   592    
96     368    
736    128    
-448   672    
240    1616   
128    1216   
0      528    
-48    -144   
48     -144   
-112   -224   
144    -416   
-864   -432   
240    -208   
256    160    
-464   80     
448    464    
32     0      
-544   112    
80     -224   
432    48     
112    144    
-240   -192   
-336   -560   
160    176    
0      448    
-208   560    
-304   160    
448    192    
-32    0      
176    912    
-528   768    
-176   0      
832    288    
128    144    
256    -64    
-512   320    
-16    288    
-160   -2224  
-1456  -1008  
832    416    
192    0      
-112   -928   
-304   -752   
-400   -608   
256    -128   
208    -304   
80     928    
-192   32     
-208   -240   
144    -48    
96     832    
0      336    
16     144    
144    -208   
320    -512   
-96    -240   
-400   -2096  
64     -16    
80     -144   
416    576    
1088   1120   
-1616  912    
720    768    
224    -16    
176    -208   
-496   176    
-112   -48    
496    -64    
-288   -80    
96     -144   
208    208    
272    -1664  
-80    208    
-208   336    
64     320    
80     32     
240    224    
-672   -112   
272    96     
240    176    
224    800    
192    384    
-240   32     
352    -96    
-672   -496   
336    -160   
80     -592   
-64    176    
-240   -464   
496    -992   
0      -256   
-80    48     
208    848    
-240   1056   
224    192    
-352   0      
144    -80    
-16    -272   
-464   -144   
416    -144   
352    0      
-144   -16    
-160   128    
80     -1872  
0      432    
-64    224    
224    -160   
-112   -144   
-288   128    
384    -272   
-16    -32    
-96    240    
-16    -160   
-256   192    
384    16     
144    0      
-176   -320   
-320   32     
1440   1328   
544    336    
-1136  -240   
288    -96    
-352   48     
592    -288   
-256   176    
16     -384   
-80    -368   
64     208    
384    -16    
-144   176    
144    288    
-288   -144   
272    -96    
0      432    
480    -336   
-448   64     
112    128    
176    0      
-160   -1184  
224    272    
48     304    
-768   160    
656    -464   
48     -416   
-128   -608   
-160   240    
96     32     
480    -16    
-160   -96    
-176   96     
112    -80    
-304   160    
576    128    
-64    192    
112    0      
-400   0      
624    16     
-416   -80    
432    80     
16     -64    
48     160    
288    288    
-432   240    
-16    144    
144    -64    
-112   -352   
240    -144   
832    720    
-32    144    
-192   512    
384    -592   
192    -880   
464    208    
-960   -880   
480    592    
80     128    
-112   112    
240    48     
-400   -80    
256    -1072  
-96    0      
432    128    
-336   -32    
288    -208   
-176   -352   
-336   -256   
-96    -976   
256    -112   
-16    -288   
688    -336   
-1024  -704   
1712   80     
-1120  336    
-288   256    
1136   -112   
-224   464    
-384   -208   
160    80     
80     -128   
-32    -208   
-48    32     
64     -64    
144    96     
144    -16    
-112   -176   
144    96     
-112   -288   
32     -560   
80     112    
368    624    
-1024  -16    
464    176    
-192   160    
-384   -128   
208    -128   
320    -16    
1104   -32    
-1264  224    
-176   -128   
304    32     
16     -256   
-160   -176   
192    -288   
32     80     
224    -144   
240    288    
-896   192    
160    0      
0      48     
128    -32    
-272   -80    
-208   -48    
-832   -272   
496    -304   
-208   48     
96     -192   
-112   0      
-1184  -3216  
1856   -1344  
880    -2256  
-2192  272    
80     192    
512    -144   
544    -80    
-400   16     
-784   48     
432    32     
-544   -32    
400    0      
-976   -176   
-48    -80    
64     -48    
288    -400   
-288   208    
-32    -16    
-176   16     
640    96     
-768   -976   
208    -1056  
-288   -736   
112    16     
688    -48    
-256   -560   
-688   -384   
-32    144    
224    80     
-80    128    
-240   -464   
128    224    
144    -128   
-592   -32    
592    224    
-272   112    
144    -720   
-192   -272   
80     -128   
-352   -176   
-32    0      
112    -288   
-512   -272   
80     -336   
-128   -448   
32     -304   
48     160    
-288   -1104  
400    -208   
-320   -368   
-400   -768   
-192   -176   
-208   -768   
736    -64    
32     432    
-304   160    
320    400    
384    16     
16     -640   
-208   -704   
-128   -736   
320    1008   
144    512    
112    -128   
80     320    
16     -208   
-16    -288   
112    448    
144    -128   
32     -144   
-96    -176   
112    32     
32     96     
240    -272   
-16    240    
-704   32     
112    448    
-208   176    
-336   448    
176    400    
-560   144    
-224   -208   
-784   -592   
496    -384   
-112   400    
-640   -96    
48     192    
-16    -176   
-928   -416   
304    16     
-352   0      
-128   352    
32     -48    
-96    -16    
-288   -64    
-160   -48    
128    -48    
-256   -176   
-240   80     
112    192    
-64    -128   
128    -16    
-176   1056   
832    -464   
-880   256    
80     -368   
400    192    
256    288    
-176   -464   
-480   -224   
80     -528   
192    416    
-112   0      
144    -16    
-368   112    
-32    96     
-144   -32    
-48    80     
-80    192    
112    80     
-48    -160   
-144   -256   
96     48     
-48    -16    
-64    0      
304    320    
-192   608    
-576   96     
304    -80    
-1376  -464   
208    -80    
-1424  -656   
1856   -960   
320    272    
-1344  -96    
1088   -1136  
-208   -416   
-48    -96    
336    -672   
-1008  -1504  
80     96     
-128   992    
240    48     
160    -304   
-304   112    
-32    -208   
-400   -112   
48     176    
-176   -128   
-224   384    
80     32     
144    240    
-368   -720   
-352   640    
1376   -576   
-1152  240    
848    1760   
880    1552   
48     576    
-832   736    
976    1008   
-112   288    
-128   64     
192    -352   
-16    -416   
-560   -416   
240    -80    
-208   160    
288    384    
-192   240    
-304   112    
432    -32    
-64    64     
-80    96     
-416   240    
528    688    
-96    -368   
-736   -96    
336    -880   
-688   192    
-64    96     
672    -128   
160    128    
144    368    
-608   352    
32     144    
80     -176   
-672   -1264  
272    -528   
-464   -448   
-352   288    
400    -32    
-128   32     
-320   -176   
176    -64    
80     240    
144    176    
-352   336    
-208   48     
-304   -32    
976    320    
-656   -816   
832    -2848  
448    944    
400    432    
-1168  128    
-496   176    
1008   -400   
-176   480    
-608   -496   
0      576    
112    -304   
32     368    
368    -96    
-608   128    
-336   -192   
560    64     
-336   16     
80     -64    
-496   -256   
688    -816   
-384   560    
336    688    
-208   176    
-176   -32    
496    160    
48     -96    
-16    144    
368    -80    
-240   496    
448    720    
-320   496    
352    208    
-112   288    
80     192    
-288   144    
48     -144   
192    224    
464    192    
-240   288    
0      128    
224    128    
32     32     
-128   144    
176    208    
-624   16     
32     64     
352    -16    
-128   208    
-160   80     
80     -144   
-464   -224   
432    80     
-128   -464   
-640   -96    
560    432    
336    -160   
-384   -80    
208    64     
-64    -240   
304    -512   
-336   64     
0      -80    
112    144    
-160   160    
160    128    
224    64     
128    240    
-656   416    
256    -144   
304    -128   
-128   336    
-16    -48    
-48    128    
192    -16    
16     192    
-16    192    
112    -64    
-240   32     
128    48     
176    144    
16     128    
-672   -2000  
272    640    
1024   -80    
-1184  -528   
1248   64     
-160   -16    
-304   384    
-352   144    
368    -112   
160    240    
-224   -64    
-16    240    
32     -144   
-16    -976   
304    256    
-240   80     
32     224    
144    -16    
0      80     
-16    -64    
416    1360   
-1040  -336   
32     240    
1232   144    
-592   112    
-192   -224   
256    192    
16     -16    
-16    -544   
-64    160    
224    256    
-400   112    
240    0      
128    48     
-288   160    
512    176    
-224   32     
-208   432    
208    -112   
80     224    
48     -32    
-288   224    
208    80     
-208   -16    
560    96     
-304   -1280  
-144   288    
272    -32    
-208   80     
-320   -816   
640    -1296  
528    -256   
224    240    
-560   -192   
-32    256    
0      -48    
80     272    
304    -272   
-528   -464   
-80    -16    
64     -720   
304    112    
-64    -288   
-96    64     
432    256    
-208   64     
80     -400   
-128   144    
304    -48    
112    96     
-64    96     
-624   -384   
768    -144   
224    -352   
-544   -16    
432    208    
-16    -48    
0      -416   
128    -272   
-640   112    
496    96     
112    32     
-80    128    
-112   16     
304    160    
-192   0      
224    -144   
-160   480    
192    96     
544    -256   
-176   -80    
32     272    
272    -176   
-544   -96    
896    -128   
-64    192    
-144   240    
-800   384    
592    -208   
-16    144    
-112   64     
288    -144   
16     112    
-112   -80    
368    208    
80     -1488  
-32    -32    
-624   -576   
672    160    
112    48     
-688   160    
448    16     
144    32     
96     240    
-288   112    
-128   -176   
96     -64    
-96    192    
32     -384   
-320   640    
2480   2256   
-2704  1968   
1632   -336   
1744   -336   
-1584  80     
-64    128    
112    176    
544    -64    
128    480    
-224   144    
-304   240    
272    32     
272    48     
96     48     
-400   96     
240    176    
224    32     
-32    32     
-240   -416   
416    -912   
-240   -512   
304    384    
-64    64     
-512   80     
256    -1040  
80     -464   
416    -272   
-352   -672   
112    -656   
64     -32    
208    480    
160    -416   
-128   -656   
0      -1600  
-96    16     
432    16     
-496   -160   
288    -1296  
288    -1168  
-512   -240   
160    64     
-32    -16    
352    32     
-128   304    
272    -400   
128    -1264  
-656   -1088  
592    -240   
-80    1088   
272    -176   
-176   -416   
320    768    
-944   208    
896    784    
-288   1328   
-336   496    
272    272    
0      -96    
32     -96    
32     -192   
-256   -304   
160    -1472  
96     16     
-128   80     
-48    352    
-48    -128   
256    496    
-256   -96    
-80    -224   
-32    112    
112    -96    
-208   -32    
272    -224   
-256   -112   
80     -32    
224    96     
96     -128   
128    0      
-224   -240   
-32    224    
64     -80    
-64    176    
208    -288   
-336   192    
576    -176   
-240   -32    
-1360  176    
16     -496   
160    -336   
16     96     
0      176    
-320   -192   
112    -16    
304    -1088  
112    64     
-304   128    
288    -352   
320    -48    
-176   -288   
-112   48     
-16    -128   
640    192    
-1328  208    
400    -272   
80     64     
-144   -320   
16     -528   
-224   -320   
480    -1728  
432    128    
64     304    
-160   32     
-288   -336   
288    -32    
-64    208    
-224   -32    
-144   -32    
160    -688   
-144   -272   
144    -240   
-48    112    
32     -112   
192    240    
64     -32    
96     208    
-272   272    
32     -304   
384    112    
-80    256    
-112   -272   
-272   -208   
-864   -1424  
-400   96     
288    -160   
-880   288    
640    -32    
464    -800   
-624   -848   
784    -1280  
304    1120   
-64    1712   
144    -80    
-304   -224   
-224   240    
496    304    
32     -16    
-192   -128   
-160   -160   
144    624    
256    736    
48     416    
-320   -720   
1136   -112   
-1696  -512   
1136   -624   
192    -288   
-368   992    
-128   1728   
-32    848    
352    -16    
-432   -208   
112    64     
192    -96    
-64    272    
-368   -16    
192    416    
-384   -544   
-320   16     
-112   -720   
-272   32     
48     112    
-288   64     
80     0      
0      -160   
-144   -64    
-368   192    
-480   704    
-320   -96    
-16    0      
-336   -128   
48     -672   
-576   16     
272    48     
-160   -16    
160    272    
-304   -96    
0      224    
240    80     
-1072  432    
304    -48    
-128   96     
-224   32     
-48    -80    
352    -16    
-304   320    
432    -240   
-112   48     
720    48     
-128   96     
-416   -256   
1008   864    
-480   -1600  
-1008  -224   
96     -64    
-464   -48    
784    48     
-288   160    
-592   -304   
80     320    
320    -176   
272    -16    
-32    128    
-192   -176   
-320   288    
368    -64    
96     160    
-240   -160   
-144   240    
16     -64    
592    576    
-1008  224    
512    416    
288    -112   
-176   384    
80     -176   
-144   208    
432    -448   
-352   160    
-48    -64    
-80    -208   
-112   16     
32     -144   
48     288    
-32    -64    
208    80     
208    -112   
-240   0      
-240   64     
592    864    
64     96     
-288   256    
336    32     
-160   16     
-112   64     
16     128    
-640   -16    
160    32     
176    96     
192    320    
-240   192    
-128   336    
672    128    
-752   -224   
240    -400   
-560   -112   
1184   400    
-48    32     
-528   -208   
512    -288   
-432   16     
464    -224   
-192   48     
-64    48     
80     160    
0      48     
80     -400   
-256   0      
96     -192   
-272   208    
-64    -288   
128    16     
80     112    
-320   16     
80     48     
-96    -48    
224    336    
-80    32     
112    80     
-224   -128   
-48    144    
80     -208   
-16    176    
-288   1824   
2064   -1008  
-1984  208    
400    -96    
-64    -112   
304    480    
-48    -192   
80     144    
128    384    
-368   -32    
304    -144   
-192   16     
-48    64     
-32    -224   
304    144    
-256   -48    
32     16     
64     192    
-16    -128   
32     128    
624    240    
-1328  912    
768    -80    
-128   -224   
-96    -96    
48     16     
-336   160    
320    480    
144    -48    
16     -64    
-128   -112   
-16    288    
-80    160    
224    -112   
176    -176   
-272   64     
80     112    
128    -112   
-288   208    
448    -16    
-448   256    
208    -64    
-16    192    
-144   -144   
-32    272    
352    -32    
-256   112    
0      -32    
16     144    
272    384    
432    1168   
1104   224    
-1008  176    
496    -288   
128    64     
-576   160    
240    32     
512    400    
-656   -128   
64     208    
112    32     
272    176    
-160   32     
-176   256    
528    160    
-416   128    
352    32     
0      176    
32     352    
112    80     
112    224    
-608   16     
1776   -352   
-672   656    
-560   608    
288    -128   
32     256    
-16    -16    
192    -288   
-144   144    
0      64     
240    32     
96     160    
-64    -112   
-176   48     
-224   176    
160    -384   
464    160    
-96    224    
-16    -1824  
112    96     
496    928    
-1360  -16    
400    -400   
464    672    
-576   -176   
-96    0      
288    272    
0      144    
32     64     
32     80     
0      32     
-96    96     
48     -320   
0      -656   
384    400    
-704   -144   
-112   176    
64     -128   
-528   384    
816    -112   
-144   128    
-16    16     
128    48     
-112   128    
112    -464   
-496   320    
208    240    
-32    192    
-416   320    
1712   624    
-2464  -544   
992    144    
1520   -32    
-1008  112    
-528   304    
-128   -1520  
-64    -288   
-64    80     
-32    336    
656    208    
-448   -112   
0      176    
144    -48    
-96    96     
224    560    
256    -832   
-544   -144   
32     528    
416    992    
-48    368    
48     -112   
-352   -496   
-96    -480   
-112   -1168  
-240   -256   
16     448    
272    320    
144    416    
240    160    
-192   48     
-64    -432   
384    176    
-128   16     
0      240    
-176   144    
272    304    
96     848    
384    1296   
-80    304    
-32    224    
272    176    
288    256    
384    1696   
-144   704    
-160   -272   
240    -208   
144    480    
208    -960   
16     816    
112    -1104  
224    -112   
-480   272    
496    384    
64     448    
-64    208    
-176   112    
-32    -736   
32     -1040  
-80    112    
-16    816    
-48    -176   
256    32     
112    -1408  
224    112    
-128   -2480  
240    160    
48     112    
0      560    
-80    112    
0      16     
64     80     
-32    -192   
80     96     
-128   48     
16     0      
48     -176   
144    -48    
-352   -272   
-96    128    
-64    80     
816    208    
-1056  608    
576    -80    
-224   384    
-16    -112   
336    -144   
-480   0      
-64    192    
128    176    
16     128    
32     -112   
-256   288    
64     160    
32     128    
-32    -224   
-80    384    
-144   144    
-80    -384   
144    -352   
96     -240   
-496   576    
720    -16    
-592   -32    
128    -240   
16     208    
272    112    
176    -224   
-624   -880   
64     112    
256    80     
32     -2224  
-112   352    
32     -304   
-288   32     
208    -224   
224    -384   
400    -368   
-528   -1616  
32     176    
-16    1280   
576    -400   
-16    -560   
-368   144    
48     -320   
432    368    
16     48     
-336   -224   
48     -176   
-176   -544   
-640   304    
112    912    
2544   -608   
-1248  16     
-1424  -624   
1872   -688   
-1184  -64    
-544   -480   
1248   -432   
-496   -272   
-320   16     
256    -128   
-16    0      
-272   -112   
208    64     
-320   -32    
-32    -96    
80     256    
160    208    
176    176    
48     -96    
640    1136   
-1472  -1232  
-272   224    
896    -48    
-656   224    
352    -224   
336    -352   
-672   176    
416    48     
-240   16     
-128   96     
-160   16     
32     -272   
576    0      
-96    -576   
-256   -32    
144    -624   
384    144    
-80    -64    
192    112    
-48    -96    
-576   -528   
272    -80    
176    416    
-352   -480   
240    -688   
-240   -80    
80     -288   
-480   160    
320    96     
-112   224    
-16    -80    
-48    -16    
-400   -1248  
-48    -160   
112    32     
80     32     
192    -224   
336    368    
-32    176    
-624   -176   
-272   -32    
240    -32    
32     0      
-320   -336   
912    -528   
-752   -576   
656    80     
-64    -2112  
224    -112   
1456   1856   
816    -368   
-1440  -560   
-96    -240   
544    -368   
176    112    
16     -112   
-240   288    
-768   -368   
288    -16    
464    -32    
-288   -96    
240    -224   
64     -208   
64     -32    
-64    240    
288    -80    
-352   16     
128    -304   
-1072  -48    
1072   -112   
-640   64     
768    -288   
96     112    
-320   -256   
-416   240    
1152   160    
-736   64     
160    112    
128    -352   
-384   112    
288    -192   
-96    -64    
224    -464   
-880   -352   
608    -96    
96     208    
-240   -160   
-816   -80    
128    -32    
32     176    
320    80     
-272   224    
0      -496   
-64    64     
-112   -96    
144    -208   
-64    -176   
-144   0      
400    160    
-128   48     
-352   -688   
-80    -112   
128    112    
16     48     
400    384    
-400   -464   
48     -352   
-80    -304   
-32    -160   
-128   128    
-704   0      
160    -16    
-400   -32    
-64    -96    
-352   32     
112    -512   
32     256    
208    1168   
272    -288   
-528   32     
80     64     
128    176    
208    -144   
-272   -16    
0      128    
-368   160    
272    -528   
-400   -176   
-80    320    
784    2432   
-1488  -1360  
-368   -64    
1360   -688   
-1056  -496   
160    288    
-224   -16    
704    688    
32     -176   
-320   -48    
-16    144    
-112   -16    
320    48     
-192   -32    
48     -352   
-640   688    
112    -160   
-160   -224   
80     464    
-16    160    
0      256    
176    1344   
528    -256   
-928   -128   
96     -80    
-16    -80    
272    96     
48     192    
-144   336    
-352   -112   
-400   -64    
320    -192   
128    -128   
-320   192    
-176   192    
208    128    
208    0      
-512   -48    
224    16     
-208   192    
224    -16    
0      0      
-48    -96    
-176   16     
112    -32    
-384   -48    
16     160    
-240   16     
96     64     
-208   -416   
1776   1584   
-2368  1216   
288    496    
1184   48     
-1376  -32    
400    304    
784    448    
-576   576    
32     288    
-80    96     
144    -80    
32     -48    
-80    -96    
-304   144    
-176   -160   
256    304    
-144   64     
-336   -32    
80     128    
272    -16    
-176   16     
528    1072   
-1520  -416   
-32    400    
1216   272    
-1264  -112   
336    704    
-640   0      
-160   96     
272    96     
-672   192    
320    0      
-272   -32    
-176   -192   
80     -112   
192    176    
-176   32     
48     464    
-80    224    
-128   -80    
-352   -336   
192    -32    
-432   -192   
208    832    
-528   -224   
384    80     
592    1520   
-1440  128    
-64    -176   
624    -16    
-304   224    
64     -48    
-288   -112   
-80    -240   
-240   48     
144    -208   
320    -16    
-656   720    
704    -288   
-112   -256   
-608   240    
-192   160    
176    0      
352    352    
-432   112    
-224   -464   
-320   -448   
480    -128   
-224   -208   
-336   64     
256    0      
-640   -2128  
-1456  -224   
512    304    
-512   192    
528    544    
-448   1728   
-240   1440   
-144   -32    
560    -288   
-144   -304   
-352   864    
-144   -352   
16     256    
400    -64    
-80    -304   
-384   -288   
-160   48     
48     272    
160    208    
80     480    
80     544    
-176   -240   
-32    -144   
80     0      
272    608    
16     1056   
-128   -624   
-368   -1424  
336    784    
-112   -176   
-336   -208   
0      -160   
352    144    
-256   -112   
128    -416   
192    128    
-80    176    
-224   -624   
-464   -832   
368    512    
-16    400    
96     208    
-192   -48    
-96    384    
112    -352   
0      64     
128    416    
-96    896    
-144   -80    
480    -32    
-48    48     
224    1008   
480    896    
-192   1328   
160    1104   
-48    416    
368    848    
-432   -656   
-96    -32    
160    -448   
-16    -848   
16     -80    
144    176    
-80    336    
-16    0      
320    112    
-176   -432   
96     -208   
560    608    
240    112    
-32    -96    
112    144    
48     80     
32     320    
112    -32    
-64    -960   
-256   -352   
752    -960   
672    -176   
-336   160    
-304   224    
160    1040   
432    272    
-16    -672   
-288   -496   
32     -352   
32     208    
-80    -16    
304    -96    
96     -352   
-304   -1344  
128    48     
176    0      
144    -192   
32     -288   
-64    16     
-128   32     
336    -288   
256    32     
-192   96     
-336   -208   
560    368    
176    -272   
-448   624    
224    -80    
208    -544   
-80    -48    
272    -672   
-144   592    
-96    192    
128    -240   
400    96     
0      -464   
-112   368    
80     176    
-48    128    
160    80     
-128   160    
32     -176   
-16    -80    
240    -112   
-80    480    
-48    80     
224    -32    
-224   288    
432    16     
-272   48     
448    32     
-160   -32    
-144   -656   
-464   -1680  
1968   848    
80     64     
-1504  -336   
1008   -48    
80     176    
-688   480    
848    48     
-464   -272   
48     -1584  
-208   112    
160    -320   
320    48     
-144   16     
-448   48     
320    160    
32     96     
-16    -144   
-16    -336   
64     -96    
80     -160   
560    1120   
-1408  -560   
128    0      
400    -976   
-384   -160   
304    176    
-160   176    
64     80     
368    -176   
-432   144    
208    64     
-128   128    
0      -336   
320    128    
-400   -112   
768    -16    
-176   480    
0      752    
576    112    
-96    0      
-32    80     
-208   -192   
128    64     
160    -112   
-16    -224   
-64    -496   
-112   -176   
672    -352   
304    -304   
-288   -176   
-32    240    
-128   -320   
128    80     
464    -144   
-256   256    
-480   496    
176    304    
-16    240    
528    -1296  
-16    16     
-432   -80    
256    192    
432    96     
48     -192   
320    336    
-400   -80    
-560   -96    
1280   144    
-16    -384   
-592   608    
2432   -2416  
-192   -256   
256    320    
-336   -1152  
96     608    
576    32     
-208   -544   
560    -224   
-368   -1168  
48     -16    
96     384    
16     -224   
-160   288    
272    -144   
64     -192   
-224   80     
16     -208   
208    80     
-480   -400   
336    -48    
-912   -192   
-192   -704   
912    -368   
-80    -240   
-368   -160   
448    -64    
-96    -352   
192    -96    
96     -512   
112    -400   
96     32     
-32    336    
112    128    
-96    224    
400    -16    
-624   -80    
224    112    
-160   32     
-400   -48    
400    48     
16     -496   
80     -352   
-192   -1040  
128    48     
-48    -16    
240    48     
192    -32    
-272   -480   
16     -64    
-80    -208   
-192   0      
64     -784   
-512   -32    
32     -320   
384    -320   
416    -400   
-96    -16    
-208   -432   
-64    176    
160    -128   
-96    80     
-32    -112   
-48    -176   
64     192    
224    -80    
-368   -64    
224    -32    
-976   -288   
272    -720   
-16    -96    
-16    144    
96     -144   
-144   -432   
16     -32    
96     192    
80     -432   
32     -144   
-32    432    
64     224    
160    -96    
704    688    
-1952  1632   
1360   -512   
0      -48    
128    -448   
-656   336    
272    672    
-288   -720   
288    -384   
288    -1488  
-256   448    
-112   -48    
320    -112   
-160   -16    
128    -864   
112    384    
160    16     
-224   192    
240    192    
-400   -208   
32     0      
288    1584   
384    -416   
-960   16     
1360   -64    
-896   1088   
112    272    
304    -112   
-144   32     
-288   -352   
-112   128    
832    480    
-512   544    
0      -80    
-544   -80    
480    -624   
112    -96    
-224   -192   
32     384    
176    -192   
128    -96    
0      32     
-32    0      
-208   96     
160    128    
32     -16    
-224   32     
-32    80     
80     -144   
480    -32    
544    528    
-592   1840   
-272   -144   
560    -208   
-688   -240   
368    -32    
368    -16    
192    128    
-288   48     
96     -64    
32     -176   
-80    -272   
-144   80     
288    608    
-240   576    
-352   224    
304    32     
-336   -672   
-288   -400   
-96    -432   
-432   -208   
592    112    
-2192  112    
992    944    
-480   832    
-1136  -320   
688    -560   
544    528    
-320   672    
-176   224    
544    -144   
-160   192    
-288   -208   
16     112    
-64    288    
-64    288    
-96    128    
320    1120   
-560   944    
-144   880    
368    720    
-304   304    
160    272    
-368   848    
576    1280   
-784   480    
672    768    
320    -64    
-64    -624   
48     400    
-48    144    
-432   352    
384    672    
-384   576    
464    656    
768    480    
-368   -352   
128    912    
-368   608    
-448   688    
544    128    
-400   -64    
-32    -208   
-112   368    
336    -128   
-240   -144   
-16    -448   
144    -240   
-224   96     
-160   96     
-80    64     
-1600  -1440  
-848   432    
96     -256   
-720   160    
1440   1408   
192    720    
-496   464    
-96    -1552  
-48    864    
80     -224   
-112   592    
-544   -336   
-16    336    
272    192    
-144   -16    
-240   272    
-336   144    
-256   -336   
352    -464   
-112   -432   
-224   -96    
48     480    
64     -16    
-80    112    
80     208    
-96    656    
-432   304    
480    352    
256    272    
-224   -240   
-96    -304   
-176   48     
-128   -176   
112    288    
-80    160    
-448   -608   
0      -1008  
0      -240   
-848   -1312  
384    -176   
176    160    
-208   0      
-192   -368   
16     160    
208    208    
-208   224    
-32    -384   
-96    -1040  
48     1264   
-128   -48    
-160   -176   
352    592    
624    880    
-720   736    
400    1392   
144    496    
-16    336    
144    1008   
32     128    
80     -336   
-192   1088   
160    832    
64     -176   
-64    -112   
64     96     
80     112    
-192   -80    
-48    -464   
208    -576   
-96    0      
-48    384    
224    96     
-160   176    
-128   -80    
16     -944   
-160   -672   
128    -304   
-304   -16    
-144   288    
-176   208    
-144   64     
176    -1136  
-272   864    
432    -720   
-432   -96    
144    -144   
-64    -528   
368    32     
-448   -240   
-224   -400   
144    -48    
144    304    
96     208    
0      336    
-192   608    
256    112    
-256   320    
-48    96     
16     64     
176    128    
-64    176    
-368   -912   
448    -112   
-176   528    
-160   32     
448    416    
-432   784    
160    432    
-240   416    
16     320    
-96    -192   
80     -16    
64     -80    
16     128    
32     128    
96     96     
-192   -64    
0      -16    
-160   128    
256    112    
-256   0      
-128   128    
272    208    
-80    16     
352    192    
-160   32     
-336   192    
192    32     
112    96     
272    -96    
512    528    
-1424  832    
-16    640    
1120   64     
-496   176    
-656   -496   
176    -704   
192    0      
-176   96     
64     -112   
368    160    
-208   -16    
-16    192    
16     -128   
-16    144    
224    -16    
-272   -16    
208    176    
400    -16    
-224   176    
-32    32     
368    -352   
64     -672   
-912   224    
1008   -240   
-640   240    
80     -128   
-32    160    
352    160    
-304   160    
144    -128   
-64    64     
32     64     
160    0      
-48    112    
96     96     
-112   -1248  
0      -288   
-336   -256   
496    224    
240    176    
-112   128    
-192   0      
464    192    
-512   -96    
-1216  16     
768    160    
-128   112    
-608   192    
384    -32    
176    96     
208    -1072  
-560   208    
-256   288    
224    -32    
-176   192    
80     -16    
-272   -64    
-32    -288   
-288   -288   
320    -80    
-240   64     
32     32     
-96    112    
272    -32    
208    288    
-528   -32    
-320   -48    
480    -272   
-80    208    
-704   3424   
1872   0      
-992   2080   
1136   -224   
-1008  -16    
784    64     
-224   -144   
-576   400    
544    -80    
-176   -320   
272    144    
80     0      
-16    -112   
-192   -64    
544    -32    
-16    480    
-64    80     
16     -112   
192    96     
-560   0      
640    480    
-528   304    
192    16     
432    -32    
64     -96    
176    80     
-144   -128   
112    -176   
-304   -368   
272    -48    
96     -384   
-96    -32    
144    -80    
-400   -80    
384    -48    
-304   -96    
368    -16    
-464   -32    
128    368    
256    432    
-256   112    
48     -256   
384    224    
-288   0      
176    112    
64     208    
-160   0      
-80    -1760  
240    -208   
-128   -352   
-48    -16    
-128   -352   
304    -608   
-144   144    
576    -144   
16     512    
-336   -256   
208    240    
480    -208   
-128   -112   
-336   -528   
160    112    
48     -80    
48     80     
16     -240   
-112   48     
32     128    
48     -320   
-32    416    
48     176    
-16    272    
-32    -64    
240    -112   
-128   -544   
112    -96    
96     -144   
-96    208    
272    -208   
-224   -16    
80     16     
160    -176   
896    -816   
-2048  1584   
992    -960   
176    -560   
448    464    
-480   -144   
-32    272    
128    -432   
-48    -224   
128    -336   
-16    -736   
-64    64     
160    -48    
0      -64    
-32    -608   
112    -352   
176    0      
16     -176   
16     96     
16     -2000  
-144   -864   
320    -752   
64     768    
304    1104   
-560   -304   
224    -272   
-16    0      
-96    -112   
80     -16    
-96    -16    
-64    496    
352    -304   
48     -432   
-288   -544   
64     256    
-144   240    
-192   -688   
560    -752   
0      128    
-304   -96    
128    -544   
304    112    
112    -256   
32     144    
-112   -48    
96     160    
-640   -16    
-96    64     
32     -48    
16     560    
1872   1216   
-1920  -48    
-960   -16    
2192   -2400  
-1840  -976   
64     -112   
64     688    
-208   160    
176    0      
-96    -400   
96     80     
-720   -336   
160    -144   
0      32     
-96    272    
48     -240   
80     -688   
-160   176    
432    -672   
-160   16     
96     -112   
-720   -272   
1296   -256   
304    96     
-1328  -752   
368    -176   
-288   -176   
-384   -2000  
-1856  -1216  
816    1488   
-176   1552   
448    -320   
176    -576   
-208   -368   
112    688    
464    96     
80     96     
-288   320    
80     352    
-80    288    
336    192    
-160   288    
-144   -128   
-352   -16    
592    336    
-1264  624    
-416   -992   
1072   -1504  
-400   -736   
832    320    
-512   -2816  
48     512    
208    -144   
-816   160    
304    -304   
-496   -64    
208    -288   
-336   -1120  
-688   -384   
464    32     
-464   272    
320    -672   
-96    144    
-128   176    
400    448    
-144   -688   
352    -192   
-32    -48    
240    -496   
-208   -128   
16     96     
-1088  1760   
992    -272   
-336   -480   
-560   -272   
608    1920   
144    912    
-96    272    
-64    -736   
-304   160    
160    -464   
368    384    
-320   336    
-32    -384   
-48    -128   
368    -192   
112    384    
-48    192    
144    192    
256    224    
-784   -320   
-80    -400   
192    144    
-192   -48    
-192   880    
432    1008   
-1424  352    
480    608    
-144   432    
32     32     
-48    -1024  
112    -800   
-256   -192   
-16    896    
208    -16    
272    112    
-768   -80    
160    512    
-144   -192   
16     352    
80     -176   
0      64     
-64    224    
288    144    
-464   80     
64     -880   
-16    -544   
48     -432   
-144   -176   
-112   560    
272    704    
-320   -256   
608    -672   
-128   720    
-624   624    
304    1152   
512    624    
-112   848    
-496   448    
336    656    
-32    880    
416    640    
-128   -16    
-16    400    
64     -64    
48     16     
-16    -352   
48     560    
240    224    
48     912    
480    480    
-496   64     
96     -48    
-96    -176   
-32    32     
-32    -144   
-528   -592   
32     -672   
64     -944   
-352   -784   
112    -16    
416    -1344  
-1216  1200   
1072   32     
-224   160    
272    416    
-144   -112   
-640   368    
368    -144   
-368   320    
400    48     
-304   112    
-256   -272   
80     400    
80     -400   
-144   176    
48     -16    
16     0      
-96    352    
-16    -32    
-64    -64    
-160   48     
-368   576    
1472   -288   
-896   -176   
-464   96     
960    -256   
-656   192    
400    144    
-48    528    
160    64     
-176   -304   
64     80     
208    -144   
-32    16     
-128   112    
112    80     
112    208    
-32    -96    
64     0      
-208   -160   
-32    64     
-256   -96    
336    224    
-48    -128   
-128   80     
-192   -272   
-80    -16    
416    112    
-240   112    
-64    -64    
-976   -1696  
288    448    
32     144    
-720   80     
960    112    
-48    -16    
-208   288    
-32    320    
-496   -48    
112    48     
224    48     
16     80     
-64    128    
176    416    
-112   80     
-384   192    
560    -16    
-544   176    
368    128    
-288   48     
192    80     
320    800    
-272   -448   
-1344  416    
1408   -320   
-1360  224    
1072   112    
-384   112    
-16    480    
192    272    
-80    32     
-288   -48    
112    128    
96     32     
-48    144    
-128   64     
-144   32     
16     -64    
448    -288   
-448   80     
272    0      
0      -128   
608    416    
-128   0      
-288   176    
-96    -208   
160    -672   
464    -224   
-512   -240   
144    -240   
304    160    
-384   16     
-48    336    
96     240    
-352   -208   
80     176    
480    64     
-320   -352   
832    -480   
-272   128    
224    -80    
-48    160    
-128   48     
-64    224    
336    0      
-192   160    
-112   48     
-240   208    
0      112    
112    -304   
2272   5744   
-1600  1648   
-336   -1344  
1792   -288   
-720   -48    
-800   -80    
368    144    
224    112    
128    -288   
-1104  -96    
656    128    
-496   -64    
352    32     
208    112    
-256   16     
-96    288    
384    112    
-32    0      
-240   0      
496    832    
112    -16    
-336   96     
144    80     
-432   160    
-272   -128   
592    144    
-272   -128   
-48    176    
464    48     
-176   112    
256    160    
-96    0      
-16    -112   
-384   -192   
480    -192   
-448   -240   
304    32     
-144   0      
-240   -80    
224    -96    
-128   128    
208    -32    
-112   -1568  
-192   -320   
288    112    
560    1248   
-448   256    
-224   -176   
352    -48    
-80    224    
112    96     
-144   -272   
144    -768   
-96    208    
352    384    
80     496    
-64    224    
-304   -2000  
176    48     
592    208    
16     160    
-224   256    
160    224    
-48    224    
352    608    
288    -48    
-368   -48    
-64    608    
416    208    
-80    -1088  
128    -656   
-208   464    
336    144    
32     -16    
80     -384   
-64    -64    
80     -368   
208    304    
0      -160   
144    80     
-224   272    
928    1696   
-1408  1328   
400    -320   
720    432    
-144   384    
-624   -144   
16     592    
640    96     
-208   -1088  
48     -224   
-176   464    
-32    -48    
144    48     
0      112    
-256   -112   
0      144    
144    -208   
80     80     
-128   0      
-64    96     
-144   224    
384    -432   
160    144    
16     -848   
-112   -352   
-160   -240   
352    -112   
272    320    
128    496    
32     96     
-192   -32    
352    128    
16     192    
48     144    
128    -128   
-320   -160   
192    -240   
480    16     
-192   -688   
-144   144    
-208   -480   
368    -16    
32     272    
-32    0      
-400   176    
480    208    
-48    224    
112    -80    
96     16     
80     -272   
1888   1024   
-1840  1216   
96     304    
80     -144   
-64    288    
0      -64    
112    176    
416    304    
-32    464    
288    32     
128    -192   
0      -208   
32     48     
-96    -32    
176    432    
176    -368   
-128   -160   
-336   160    
624    496    
-80    -272   
256    -80    
-880   64     
1792   -592   
-1120  -48    
416    -272   
320    304    
-320   112    
-448   -848   
768    1136   
480    1184   
-208   992    
688    48     
96     -416   
-416   -400   
176    0      
288    176    
144    176    
-464   -288   
224    80     
304    224    
-16    304    
128    -2368  
192    112    
-288   -464   
416    -304   
176    -1104  
432    -1408  
32     -656   
224    -64    
528    112    
-176   -32    
240    -32    
176    240    
-272   -608   
-400   -224   
-352   192    
-752   -112   
-480   -2384  
-192   -672   
208    -272   
-496   -816   
416    -224   
80     48     
320    496    
160    144    
16     736    
96     -160   
-192   48     
480    -96    
-48    272    
-352   -1152  
928    -2160  
320    640    
288    -960   
-1152  -976   
560    -832   
-192   912    
896    -144   
-112   464    
-928   -176   
416    -16    
656    16     
112    160    
-624   304    
-32    -32    
592    112    
0      0      
-1472  -240   
-560   -704   
128    -1088  
352    -464   
-32    -96    
160    432    
-608   -288   
224    -1552  
416    -416   
-352   64     
240    48     
-128   320    
32     -384   
384    -208   
-128   160    
-112   16     
-352   -192   
-304   48     
336    -32    
192    -224   
-176   -448   
256    -160   
32     -496   
128    -16    
-144   -256   
272    -64    
64     -160   
-352   -192   
256    80     
304    944    
128    432    
128    64     
-240   -256   
-16    -224   
288    304    
-96    -48    
-512   -208   
48     -864   
-64    -144   
192    144    
32     304    
-304   128    
160    -144   
0      -80    
112    -48    
-64    -32    
128    -48    
-496   64     
16     -144   
-160   48     
96     -176   
-128   16     
224    288    
336    -48    
-320   -2672  
176    48     
-144   -48    
160    -16    
336    688    
-896   416    
-96    -384   
176    -16    
-352   -272   
-192   32     
-704   -1152  
1648   -688   
-480   80     
-592   -480   
832    304    
144    -720   
-480   352    
-112   -96    
48     0      
-112   16     
112    -128   
-144   -176   
-96    208    
208    384    
80     -64    
-80    -352   
256    -272   
-224   320    
48     -208   
144    -16    
240    608    
-640   -304   
-624   368    
1152   -416   
-416   16     
-144   64     
-256   -80    
320    144    
-64    32     
320    -288   
-384   112    
-80    -240   
224    224    
496    -240   
-688   192    
128    -32    
-80    -192   
176    -16    
-160   16     
176    144    
-112   128    
-176   80     
80     -16    
-112   -96    
448    -96    
-624   64     
144    160    
80     0      
-160   -128   
-368   -544   
144    -1088  
-144   80     
736    -96    
-1056  -96    
-128   176    
464    144    
-112   128    
-16    0      
-80    64     
-544   0      
304    160    
64     16     
0      64     
-288   -32    
464    80     
-496   80     
48     0      
192    128    
-464   -160   
272    80     
-128   64     
-912   -416   
1104   -384   
-48    -208   
-624   -240   
960    256    
-304   -272   
-208   -336   
-192   128    
352    128    
-48    32     
-224   144    
432    96     
-64    -32    
-464   128    
432    -48    
-128   144    
112    32     
-112   160    
160    -16    
240    128    
-256   -544   
848    256    
-144   64     
-64    -32    
160    160    
-176   112    
112    256    
672    -720   
-672   400    
496    256    
-80    64     
96     -96    
80     64     
48     -48    
48     64     
448    -288   
-144   64     
-160   592    
-416   48     
0      0      
128    16     
-112   -64    
80     48     
-144   80     
-176   -176   
192    -96    
-192   -80    
-352   96     
0      496    
-1056  -1760  
-1264  -368   
240    -272   
192    208    
1504   160    
-880   160    
-752   192    
848    224    
-416   -80    
576    176    
-160   0      
-128   64     
-160   80     
64     48     
-224   -16    
144    432    
224    -80    
-272   128    
592    464    
-480   640    
192    256    
80     -16    
176    48     
-144   -112   
-144   480    
496    496    
-720   320    
144    -80    
320    352    
-176   368    
-112   720    
-160   368    
352    224    
112    112    
-112   432    
-496   304    
384    -480   
208    -832   
-400   -304   
-112   -64    
96     -32    
-160   -240   
-112   -400   
176    -112   
-720   -672   
-464   -736   
-144   -208   
400    400    
-144   -720   
-352   -784   
160    240    
368    880    
-880   512    
640    832    
-496   800    
352    304    
480    1712   
-592   1792   
-16    -352   
-96    -1344  
-16    -32    
32     272    
-16    112    
0      -160   
-48    576    
272    0      
-320   -224   
192    -80    
144    -48    
-240   -256   
-16    -240   
-160   96     
-176   336    
336    176    
-32    -16    
256    -80    
-224   336    
-112   144    
112    -48    
208    128    
-176   80     
128    336    
-240   112    
112    -48    
256    304    
-64    -272   
-128   224    
-64    -224   
128    224    
224    224    
-80    16     
-64    64     
0      48     
96     64     
288    64     
-400   160    
352    32     
-304   16     
96     128    
16     160    
-48    -16    
256    -144   
-832   192    
288    256    
-176   336    
352    -160   
0      -176   
-16    -320   
-48    64     
-16    160    
224    288    
-320   160    
-48    -272   
288    112    
-320   160    
32     -48    
224    128    
112    -304   
-96    -656   
48     -352   
48     0      
112    288    
-240   32     
80     176    
368    -48    
-48    224    
-272   80     
-96    64     
80     144    
-208   -48    
-176   -224   
-656   -1056  
-1152  592    
1840   288    
-1184  896    
432    640    
304    0      
272    496    
-400   1584   
-176   -624   
240    0      
-144   432    
0      48     
32     -272   
-160   -128   
-16    128    
224    256    
-160   -272   
112    -1360  
-320   512    
144    928    
-176   -496   
1056   -720   
-1424  16     
1056   672    
144    480    
-320   928    
352    240    
768    1456   
448    1184   
-432   1104   
112    -144   
-384   -16    
192    -528   
464    -288   
32     272    
0      240    
-48    144    
240    880    
608    320    
128    512    
-720   672    
160    224    
352    272    
-176   -336   
-32    -80    
112    -480   
656    -688   
-384   -816   
432    -128   
-400   -592   
176    256    
272    352    
-208   96     
-448   -272   
272    -448   
-464   192    
304    -48    
-576   -112   
240    112    
336    48     
-528   16     
352    32     
64     -176   
368    496    
16     -64    
160    -32    
672    256    
-80    128    
208    544    
-640   480    
176    -2752  
-1312  -832   
192    -16    
448    320    
1152   64     
-944   -48    
80     160    
-352   528    
736    176    
-512   0      
80     -48    
-32    -592   
-80    -96    
560    256    
-224   -240   
-128   0      
0      64     
-272   32     
992    672    
-752   1024   
48     -256   
288    -208   
-304   -496   
192    336    
-16    -336   
-368   304    
352    16     
-352   96     
208    96     
0      208    
-160   64     
80     48     
128    -320   
-64    -640   
288    16     
-176   -960   
224    -64    
16     -432   
208    160    
304    112    
-256   160    
-64    -160   
336    128    
-16    208    
448    496    
-416   16     
208    144    
160    160    
112    96     
-256   272    
240    -112   
224    400    
-112   -400   
-80    192    
112    -176   
144    32     
-208   -1232  
176    16     
80     128    
240    -1056  
-112   96     
32     -1328  
-96    -80    
128    -16    
-80    -1072  
128    -64    
320    496    
-256   176    
-112   -64    
496    -368   
-160   176    
192    -112   
160    -544   
-176   112    
160    -544   
16     -144   
-80    -208   
-16    352    
192    -160   
-96    -512   
-16    176    
640    1184   
1904   -800   
-1696  592    
464    -176   
-80    16     
192    -80    
-32    -96    
128    320    
-272   -320   
96     240    
80     -96    
-96    -48    
-96    -128   
64     -448   
208    -96    
112    -240   
-128   -480   
176    -1440  
-112   304    
128    -224   
592    608    
-1520  -128   
640    -144   
368    -224   
-432   -256   
-240   304    
192    -160   
-480   -336   
-48    32     
352    -144   
-320   192    
128    -48    
-112   -208   
112    128    
-224   -480   
320    160    
16     -400   
-320   112    
352    -176   
-160   160    
128    32     
-96    -32    
-608   -48    
64     -48    
112    48     
-368   16     
144    0      
-48    -368   
272    48     
-448   -3008  
832    288    
-128   -848   
-80    144    
208    -240   
-144   0      
-304   -112   
240    608    
-16    464    
-304   208    
-736   -64    
128    -112   
-224   -144   
128    -544   
160    -16    
-720   -208   
608    208    
-240   -112   
112    -96    
464    80     
-144   -128   
-16    96     
-416   -624   
-176   464    
1056   -176   
-1456  -464   
544    -144   
-16    -176   
-256   -144   
-496   -272   
384    -224   
224    128    
-16    -1056  
144    -128   
-176   32     
-176   -208   
224    144    
176    -16    
-288   0      
64     128    
-32    -64    
48     -160   
-64    -16    
400    288    
752    -336   
-1008  -304   
848    64     
-544   -1472  
-144   -192   
896    224    
-528   176    
-560   -112   
304    0      
112    -80    
112    -80    
-272   448    
-208   224    
240    144    
-80    -240   
160    -128   
-320   -512   
272    96     
144    160    
368    -160   
-720   240    
384    16     
-32    464    
176    -160   
-448   64     
64     112    
-384   288    
2560   1376   
-2752  1600   
1056   -384   
1584   -160   
-1680  -48    
-512   -32    
416    240    
-272   -48    
-48    0      
592    128    
-176   -64    
-208   208    
16     -16    
208    -48    
-128   -272   
-64    -128   
0      -48    
-16    -224   
-80    144    
528    80     
-192   -528   
-416   -496   
-240   -512   
304    736    
-608   368    
-304   208    
-80    528    
-400   176    
176    16     
-272   -768   
-144   -112   
80     64     
-32    -208   
112    -256   
-384   -448   
112    96     
96     0      
-256   320    
80     800    
48     -400   
-320   -320   
544    368    
-144   -384   
416    288    
-224   848    
-144   -208   
368    -16    
-192   -704   
0      -144   
-48    176    
0      -224   
528    768    
-464   -704   
-880   -480   
784    -576   
-736   752    
-336   -80    
-256   -400   
-112   464    
208    -224   
-368   0      
64     -32    
96     112    
-224   224    
352    304    
240    -48    
-64    160    
48     -128   
-304   -64    
-208   96     
0      -48    
-256   144    
64     96     
-240   -16    
80     96     
-32    -256   
-144   144    
192    96     
0      304    
-96    -16    
16     32     
656    624    
-1376  768    
544    -256   
-80    288    
256    128    
32     -48    
-256   304    
16     -256   
-96    -16    
-432   -16    
-48    272    
-112   -144   
32     -144   
144    -96    
-320   -48    
16     160    
0      64     
128    -240   
208    64     
-224   256    
480    160    
-1232  448    
448    -400   
240    160    
-528   -48    
-176   -32    
528    -64    
-272   -64    
-128   272    
0      320    
0      64     
128    16     
-272   208    
32     144    
-16    64     
-128   192    
-144   208    
272    336    
-288   352    
-384   -416   
96     -192   
-208   224    
-160   0      
-112   208    
416    -32    
80     -112   
-176   160    
208    -112   
-80    -192   
-352   -48    
-592   -1296  
-784   480    
976    -80    
-1152  576    
-112   640    
416    272    
-288   -96    
-208   1440   
112    -528   
208    -560   
-576   -1136  
16     -320   
-80    -160   
272    416    
-208   16     
80     208    
96     528    
0      -320   
-272   208    
160    -160   
-336   -304   
912    1152   
720    160    
-1360  1376   
1744   -1712  
-2112  -32    
1760   -432   
-560   -256   
-720   256    
400    352    
-224   32     
288    -48    
-128   -112   
-256   464    
608    192    
144    -48    
-192   208    
32     176    
192    0      
272    496    
-512   352    
-32    80     
416    416    
384    -256   
-880   544    
352    -176   
-176   -448   
-128   336    
-112   128    
-80    -32    
464    400    
-608   224    
-112   -80    
-96    -32    
400    -48    
448    720    
-784   208    
448    720    
-624   400    
-320   96     
32     112    
16     -32    
144    -16    
272    128    
-224   -144   
192    -80    
320    80     
224    160    
-288   48     
-656   -1136  
240    -3904  
-1088  -880   
-128   192    
-80    0      
1072   272    
-176   128    
-528   96     
-16    160    
320    256    
-112   -32    
-16    16     
432    0      
-432   144    
224    144    
160    0      
-16    64     
80     176    
32     0      
608    720    
-944   624    
608    448    
176    -48    
-304   176    
-560   160    
656    192    
-176   -176   
80     48     
240    -352   
-160   224    
96     96     
48     176    
128    48     
176    0      
-400   -96    
800    224    
-336   -192   
320    -96    
-112   -192   
48     -1056  
656    144    
-576   96     
240    192    
176    144    
96     160    
304    176    
-480   128    
560    112    
-128   144    
-48    -480   
208    0      
16     -48    
320    528    
-224   240    
-176   -1056  
1072   128    
-864   80     
80     0      
320    16     
-80    128    
240    160    
208    64     
-64    -48    
-80    224    
64     48     
80     -112   
0      128    
48     240    
176    368    
-304   -912   
-128   64     
208    192    
-272   32     
400    64     
16     16     
-32    160    
-128   -16    
112    288    
48     736    
-320   368    
240    -64    
112    64     
432    1904   
1616   -576   
-1760  272    
736    80     
144    -416   
-224   -624   
112    -80    
272    1056   
-912   352    
416    -256   
448    64     
-272   32     
-192   -96    
176    336    
352    16     
-144   -272   
208    112    
-336   32     
96     48     
288    -160   
-48    -1056  
-496   -1024  
400    112    
-448   -48    
640    176    
-96    112    
-384   -336   
32     96     
256    288    
-128   80     
96     48     
32     32     
-288   -752   
368    -112   
-80    -528   
-80    -160   
208    16     
-144   -448   
48     -32    
-32    16     
-48    160    
0      176    
272    80     
-144   -336   
272    -16    
-352   -608   
432    144    
-192   -192   
32     48     
-752   -2736  
2144   1088   
1568   64     
-2080  -416   
1040   -304   
384    -208   
-1024  48     
448    96     
160    -32    
32     -144   
-16    96     
0      -48    
80     96     
32     -80    
-80    96     
496    0      
-112   144    
-144   -48    
64     112    
0      -64    
448    -464   
-448   -352   
848    656    
-448   -1184  
0      -192   
944    -2064  
-176   832    
192    -256   
32     256    
304    -32    
-16    48     
-416   -1776  
-144   -352   
272    -96    
224    96     
96     -176   
112    80     
-992   -224   
544    -224   
-144   80     
-64    -560   
96     -96    
0      -1248  
384    -448   
-304   560    
-48    -528   
192    -800   
496    944    
784    -496   
-608   80     
1024   -112   
-368   128    
-176   0      
-144   -48    
-32    -304   
336    -320   
640    -416   
-304   96     
-256   560    
384    -2048  
-192   -560   
-464   48     
288    16     
64     -96    
0      288    
144    -544   
-128   320    
560    -96    
-16    160    
-64    176    
-208   32     
416    -2448  
-1680  -800   
-16    384    
464    -560   
48     -160   
48     -496   
-112   624    
-496   -64    
592    -1152  
-176   -272   
-80    80     
-128   -352   
64     -32    
-608   -352   
-144   48     
-64    864    
96     -304   
-80    16     
304    -560   
-144   -16    
80     -752   
-144   0      
480    368    
144    -320   
-448   -96    
160    -864   
-800   -832   
160    -576   
-144   432    
352    -256   
-1392  304    
32     144    
-352   -192   
112    -1472  
-448   -1136  
176    -528   
-368   160    
416    624    
240    -48    
-592   -736   
-96    -64    
-192   -384   
144    -32    
-96    -288   
336    -272   
-688   352    
368    -16    
-752   176    
-128   -704   
192    80     
-96    -720   
768    976    
560    -304   
-752   -160   
80     64     
-576   400    
192    -320   
-720   -1456  
704    -512   
448    416    
-576   128    
-256   -704   
160    416    
224    240    
-80    288    
-32    -128   
-320   -48    
400    -112   
192    -16    
96     32     
176    48     
-288   160    
112    0      
-176   -64    
48     160    
-128   48     
-320   -144   
176    -80    
80     -256   
112    -16    
-32    -272   
-208   -416   
480    -320   
-704   272    
512    -224   
64     -32    
272    -416   
-64    -160   
160    -112   
320    -272   
-16    160    
96     368    
-32    192    
176    -272   
32     96     
0      -176   
-448   320    
0      352    
-512   16     
-240   -176   
-1552  -272   
592    32     
240    -160   
-480   80     
352    256    
-848   0      
-176   -16    
400    656    
0      -288   
-416   -144   
-128   192    
240    288    
400    -352   
-560   -192   
-384   -304   
160    -176   
336    624    
-144   -304   
-352   448    
-224   -240   
192    208    
96     -208   
112    96     
-400   -352   
80     80     
256    320    
-240   144    
-16    -64    
-368   -64    
-112   -496   
-48    -1184  
1680   -832   
-1840  -32    
720    272    
80     -400   
-176   656    
384    -64    
-176   272    
384    432    
-128   480    
208    16     
-400   64     
240    -96    
-96    240    
-112   224    
-48    128    
-80    -80    
-176   -16    
-240   144    
-496   -16    
-128   -64    
-96    -304   
1168   1152   
-112   336    
-160   -96    
-560   32     
544    -336   
-192   -16    
208    592    
624    -16    
-592   -208   
144    208    
0      0      
-48    -32    
64     176    
-240   48     
-96    -16    
240    -48    
80     -208   
0      -48    
208    112    
-48    96     
-480   -512   
608    -176   
-336   256    
576    -320   
-464   64     
-448   -688   
-736   0      
-144   576    
448    368    
-352   -272   
-48    80     
-480   64     
80     64     
864    1072   
-592   704    
-816   336    
48     96     
-64    -576   
-144   -288   
-64    -80    
-496   160    
-144   48     
80     -304   
-80    384    
-544   -480   
-656   320    
656    16     
-496   -64    
-240   1216   
2288   2592   
-112   -528   
-1120  -592   
640    288    
368    0      
-256   80     
-288   64     
416    176    
-560   -416   
-64    416    
-224   -112   
16     -192   
272    112    
32     32     
-96    160    
-336   128    
384    64     
240    48     
-672   -496   
-256   -128   
208    16     
-304   -16    
432    80     
336    -112   
176    -160   
-496   48     
288    208    
-32    112    
256    80     
-256   -112   
-464   32     
288    -112   
-176   96     
80     -96    
224    192    
-16    -224   
-624   -144   
624    336    
-976   128    
464    224    
-64    -80    
-208   48     
16     80     
-128   64     
272    16     
16     336    
544    432    
-240   112    
-304   32     
192    32     
-16    32     
-448   -976   
-128   -80    
-64    272    
80     48     
512    -64    
16     -480   
-320   128    
224    -112   
208    112    
-176   96     
-128   208    
240    176    
160    192    
-160   80     
-112   -32    
32     112    
416    272    
-400   32     
176    -48    
160    -48    
-160   240    
32     144    
48     -192   
-112   -144   
-80    -144   
272    144    
-80    -16    
0      -48    
-160   -32    
-544   -1344  
1328   -976   
-1440  624    
544    -112   
48     112    
-560   48     
368    -64    
176    304    
480    1104   
-272   -16    
-32    -448   
256    224    
64     -48    
-16    176    
-192   -96    
288    -336   
-96    528    
432    144    
-208   48     
64     160    
144    176    
-304   -752   
816    -432   
-448   640    
-512   128    
432    -48    
16     -112   
224    -400   
-272   448    
224    48     
-16    176    
0      64     
-16    -128   
32     432    
240    80     
-256   176    
128    -16    
-96    224    
96     176    
64     352    
80     32     
-128   16     
64     80     
32     128    
96     208    
-96    -16    
-144   -16    
320    -320   
-144   320    
-32    -464   
-592   -848   
1888   -688   
-1568  32     
784    80     
128    288    
-432   128    
368    128    
-192   224    
464    400    
-64    32     
-128   176    
192    128    
-32    48     
48     16     
-128   48     
480    288    
-272   176    
-64    48     
32     -16    
304    96     
-32    112    
496    720    
-1664  352    
640    176    
-304   672    
304    -64    
128    -96    
64     -560   
368    240    
0      112    
-128   -656   
-160   -464   
-16    208    
112    -32    
64     -80    
160    -336   
96     144    
-304   256    
400    -224   
32     128    
-64    32     
-192   240    
-32    -176   
224    128    
-144   -384   
272    624    
-288   0      
-720   -1840  
-288   -976   
480    -320   
-816   32     
240    128    
-176   -224   
272    -144   
128    432    
464    192    
-464   -432   
336    -848   
-240   -416   
160    -224   
208    336    
-16    -672   
-80    -64    
-80    -1520  
64     0      
-112   -480   
928    -608   
128    48     
80     -416   
-160   -416   
-64    -368   
1328   1904   
-2096  368    
-288   528    
2144   -1520  
-1136  -736   
-208   -592   
16     48     
528    -560   
0      -560   
-144   1184   
0      -528   
-16    -112   
416    320    
112    192    
-80    -432   
-192   192    
112    -32    
48     384    
-208   224    
368    480    
-176   -1120  
224    480    
-272   -272   
-224   384    
816    992    
32     736    
-272   -16    
80     688    
-160   -256   
224    -80    
16     160    
-256   -128   
0      -48    
160    400    
576    672    
-224   272    
-224   -208   
160    -1488  
512    0      
-128   32     
-80    -80    
-528   -320   
-304   864    
48     -480   
112    80     
16     -1312  
-32    -720   
288    -208   
112    864    
16     368    
-208   112    
16     784    
1216   336    
-512   240    
208    528    
-144   64     
464    -272   
-1248  96     
112    224    
-160   64     
-80    -96    
272    48     
240    -16    
-384   -176   
16     224    
-32    -544   
-16    -16    
352    528    
-672   -160   
0      544    
64     -128   
-16    -240   
-224   -336   
-16    0      
400    640    
-160   528    
320    560    
192    -16    
16     224    
-16    -3744  
-48    352    
560    1104   
384    -144   
-608   -736   
176    -432   
-320   -736   
272    -896   
96     464    
-176   912    
-112   528    
-96    -448   
288    -432   
80     -64    
32     -352   
-224   64     
16     144    
-16    176    
16     336    
-64    -80    
16     -96    
16     304    
144    1040   
80     -64    
-288   528    
-96    704    
32     528    
224    -1008  
-144   -32    
-80    128    
144    352    
-64    496    
144    -928   
96     16     
-128   432    
-80    64     
96     288    
96     -192   
64     -496   
-208   -144   
-48    -80    
0      96     
-864   32     
80     -96    
112    -208   
-80    -624   
272    -112   
-112   -1056  
-64    176    
64     48     
32     112    
640    2320   
-304   0      
-944   304    
1168   -176   
-864   96     
-1024  -272   
1040   -320   
-448   -704   
-272   272    
272    -368   
-96    144    
160    -432   
-112   176    
256    16     
-608   -144   
336    64     
48     -32    
-320   -224   
32     -144   
208    -16    
16     -16    
-224   -112   
560    224    
1264   0      
-1056  -32    
1104   64     
-464   -96    
0      96     
480    192    
-912   256    
208    -208   
-288   48     
224    64     
-32    -160   
160    96     
192    -64    
-448   16     
176    -352   
-16    304    
336    32     
-32    -32    
-112   -320   
-432   -464   
1184   -96    
-496   112    
-128   -192   
368    32     
-544   144    
112    -208   
544    368    
160    176    
-912   112    
400    -16    
32     96     
-528   -544   
416    -288   
-112   -864   
0      -384   
-448   -464   
-512   -544   
432    48     
-608   48     
-496   -16    
-48    112    
112    64     
912    240    
-864   272    
-608   -112   
976    144    
-848   -528   
-592   -288   
3360   -1680  
-832   912    
-1200  80     
-592   48     
800    80     
384    -384   
-800   608    
96     368    
-672   96     
-48    48     
336    -96    
-272   -160   
-80    128    
-176   -64    
176    160    
176    128    
-240   -64    
-64    0      
0      -688   
-976   -256   
848    -32    
-576   352    
480    -192   
-656   -128   
-416   -16    
352    -112   
-1152  -320   
720    -96    
-48    32     
-16    -112   
-224   128    
0      -112   
-224   80     
480    96     
-640   -32    
624    304    
-592   80     
-208   288    
-144   96     
-560   0      
208    160    
-192   272    
-16    -112   
64     -240   
-144   -144   
64     304    
-128   128    
176    160    
112    144    
-192   208    
240    112    
-272   512    
592    -112   
-496   -208   
-384   112    
576    96     
-160   -240   
176    592    
-528   432    
144    144    
112    112    
-16    -16    
-48    64     
48     224    
96     272    
-96    144    
-240   224    
-32    -352   
-128   -592   
-224   -448   
-64    144    
-96    304    
-176   224    
128    -128   
48     144    
160    16     
-272   -432   
64     -736   
-64    -112   
96     112    
912    2336   
-2512  416    
800    -128   
672    -768   
-560   352    
96     -16    
-672   -160   
432    -336   
-176   -32    
192    -96    
-304   128    
-16    16     
272    64     
-48    32     
-64    -320   
80     448    
0      352    
-16    -48    
48     16     
-192   16     
-208   -304   
112    -1056  
80     112    
-64    352    
32     496    
-80    208    
-80    128    
288    240    
-96    528    
-80    128    
-176   0      
64     -144   
-160   -224   
192    160    
-16    80     
-272   -64    
192    -256   
112    384    
-128   256    
96     624    
288    240    
16     -144   
-96    128    
96     272    
-96    0      
176    -128   
32     112    
-208   -128   
32     96     
464    160    
1184   160    
-2992  464    
304    512    
1104   48     
-976   -96    
352    256    
-160   -640   
-528   1040   
80     752    
160    224    
208    -64    
-432   -32    
224    64     
208    -208   
-688   -608   
352    -160   
176    -64    
-192   -528   
16     -304   
272    240    
-160   784    
-640   16     
2288   -144   
-416   880    
-1440  1216   
880    144    
96     320    
-240   416    
256    224    
-64    160    
-176   400    
192    384    
64     64     
160    -112   
-256   144    
352    208    
112    32     
-208   176    
208    192    
-48    1024   
128    416    
208    384    
-240   -336   
400    912    
-864   896    
80     -240   
-224   -272   
400    192    
-1136  -784   
384    -1584  
144    -608   
0      352    
432    -208   
-64    -160   
-784   -144   
400    -512   
-32    -80    
592    -320   
-16    -16    
-192   -320   
496    -416   
-784   -416   
112    -48    
16     416    
416    -240   
288    64     
288    48     
-384   80     
288    -336   
400    416    
64     80     
-1184  1088   
976    112    
-1008  -752   
-992   -1152  
992    -800   
-64    -240   
320    1504   
-864   1200   
368    -496   
448    -64    
96     448    
192    416    
-448   320    
32     288    
416    -304   
128    -80    
-32    -192   
32     -128   
80     544    
-16    208    
96     -224   
160    192    
-64    -256   
-496   416    
720    320    
-48    528    
-16    288    
-304   -784   
-368   -1248  
368    336    
16     256    
-144   208    
176    -128   
16     144    
-352   -864   
320    0      
240    272    
-768   -1184  
240    -464   
432    800    
-304   224    
-48    240    
96     48     
-112   320    
0      -848   
32     -1040  
-64    -320   
-64    -224   
48     592    
160    -752   
-640   -576   
784    -1552  
-480   176    
-176   448    
320    544    
-256   -528   
-384   -720   
144    -272   
160    992    
96     880    
192    560    
-16    224    
-144   -48    
112    128    
160    -192   
16     272    
0      -288   
-384   -432   
-192   -192   
400    -96    
-256   -80    
208    384    
-48    320    
-80    208    
432    336    
-304   96     
16     -432   
-32    -688   
80     128    
64     -32    
912    784    
-1472  512    
1216   -144   
-1152  -864   
656    -656   
-432   -432   
368    288    
-128   416    
288    816    
320    448    
-320   96     
48     224    
96     -352   
-64    -176   
-64    -240   
224    -176   
-192   -848   
304    416    
192    144    
16     192    
-432   -240   
592    -768   
-560   528    
688    16     
-448   368    
320    80     
-464   128    
208    -400   
256    160    
-128   -432   
-128   240    
240    96     
48     272    
-80    64     
208    80     
-176   -16    
160    112    
-192   -80    
448    208    
-400   64     
64     -336   
336    96     
-112   -176   
192    144    
-256   -144   
144    272    
560    -32    
-320   -16    
64     48     
320    -496   
-736   -1888  
-1920  -2064  
1216   -128   
-1216  -112   
224    -128   
720    -16    
-288   -640   
-416   -176   
496    -48    
48     -32    
-160   96     
144    80     
-64    -352   
-32    112    
192    -560   
-96    32     
-160   -480   
240    64     
-416   -64    
-80    -352   
-112   -96    
656    576    
-560   -544   
-1408  -128   
1264   192    
816    -16    
-864   -64    
432    0      
400    480    
-496   -16    
368    -64    
32     -32    
128    -32    
-640   -256   
320    208    
464    -128   
-512   -160   
576    352    
-112   -688   
16     -176   
256    -3024  
-112   -16    
-432   -480   
896    688    
-672   -240   
-608   272    
544    -320   
-656   -336   
416    -160   
-176   224    
-176   -240   
-256   -64    
288    -64    
304    -208   
-32    176    
-416   -528   
288    -400   
-80    544    
-272   704    
416    -560   
96     -128   
-224   256    
96     -144   
192    80     
192    -80    
96     448    
-1104  144    
304    64     
176    -304   
-96    48     
-320   2192   
2624   -960   
-1840  -2336  
2016   -416   
416    336    
-1152  288    
32     -272   
416    352    
320    -432   
-800   -192   
-320   -32    
-192   -64    
-224   48     
-64    -80    
-64    16     
-384   -272   
464    160    
48     -1328  
-32    144    
-32    -608   
-736   0      
624    -144   
-432   48     
720    -160   
0      -112   
-160   -16    
304    48     
-496   32     
496    128    
-592   400    
320    -144   
-32    144    
80     64     
-192   192    
16     224    
256    -80    
-128   272    
224    384    
-464   560    
-64    64     
160    112    
-176   -64    
192    -96    
-656   -208   
528    240    
208    96     
-336   32     
-16    -96    
336    352    
96     96     
-304   -80    
-112   16     
-128   160    
560    -192   
-704   -1504  
-256   -1056  
112    64     
64     256    
448    -144   
-64    368    
-320   176    
240    336    
-112   -272   
144    -144   
-96    128    
96     0      
48     -32    
192    -96    
-80    -32    
48     0      
-272   -32    
64     16     
-224   -704   
496    -528   
-288   -144   
-784   -96    
304    -192   
-192   -144   
-544   656    
-224   592    
96     -128   
-320   -992   
-688   -1600  
-1024  672    
720    -912   
-224   -144   
64     192    
544    1200   
-592   96     
272    -416   
-368   16     
192    -288   
32     32     
-176   128    
-176   -64    
-16    128    
-128   48     
-112   128    
-16    -96    
-96    320    
-64    64     
-160   -16    
592    16     
-272   -368   
-512   -1184  
240    -480   
-128   448    
320    -576   
-272   -432   
-176   624    
-368   320    
-112   -448   
96     80     
0      -208   
-80    64     
112    16     
112    -192   
192    256    
-208   304    
-352   -112   
480    -656   
-16    -128   
-272   480    
16     160    
0      304    
-224   -160   
336    -336   
-208   320    
112    -64    
-496   -80    
-144   144    
-1056  -1296  
2544   -624   
-288   1120   
-1168  -864   
704    -1120  
-320   -48    
-336   -784   
592    64     
-160   240    
-368   -432   
-16    576    
224    -224   
32     128    
-416   -160   
-48    304    
-128   -48    
80     144    
-112   112    
-64    64     
-336   0      
80     224    
-240   -656   
-400   368    
384    -640   
-672   -848   
736    -544   
-432   -368   
-144   1264   
400    288    
-512   -1184  
-288   -976   
432    688    
-176   256    
-208   -464   
32     144    
-416   768    
-48    384    
208    -400   
-192   304    
272    -416   
-256   192    
-176   208    
608    912    
-688   608    
-80    640    
288    1168   
64     800    
-480   1728   
-544   1472   
-576   1440   
672    560    
-256   -80    
-400   -112   
80     -368   
384    1264   
-496   288    
-400   272    
160    960    
-880   480    
384    688    
-304   288    
-288   304    
-112   -192   
48     288    
128    80     
-416   -176   
256    -112   
208    -144   
336    -576   
16     -416   
96     80     
-1040  -976   
-176   512    
128    0      
-176   992    
1072   -64    
-528   -240   
-592   -656   
240    -1264  
272    1024   
224    496    
-496   48     
-384   -592   
496    48     
384    432    
-192   -48    
-208   -192   
96     -240   
176    32     
176    384    
-304   848    
0      640    
-80    160    
576    32     
256    -384   
-272   -336   
272    832    
-368   736    
304    304    
336    208    
-240   272    
-96    -176   
-144   -304   
-208   224    
112    208    
-528   -352   
480    -96    
-304   320    
-64    -240   
224    -480   
-64    -560   
64     -240   
-96    -80    
176    256    
32     224    
304    1104   
-256   576    
80     624    
208    736    
-16    512    
208    144    
-384   176    
-128   640    
1344   224    
-816   -176   
-160   64     
144    128    
-96    432    
336    368    
-160   64     
-16    -80    
-80    64     
-32    112    
96     -192   
-176   112    
96     240    
192    544    
-416   224    
544    1088   
-560   752    
192    176    
48     368    
208    272    
-256   272    
96     0      
320    48     
-112   -320   
-416   128    
368    352    
64     -144   
-16    64     
976    1312   
-1888  928    
1248   -128   
336    128    
80     -160   
-400   208    
80     32     
112    -96    
-224   -240   
320    -208   
-208   400    
-64    80     
304    192    
-48    0      
-256   -320   
48     -464   
32     512    
64     0      
-192   48     
288    -160   
-208   96     
672    864    
-288   288    
-128   -240   
576    64     
-400   -416   
224    48     
-192   224    
240    -752   
-400   128    
64     -1312  
176    48     
0      176    
96     80     
-176   48     
-96    48     
240    -112   
-80    0      
48     16     
-16    112    
-304   32     
480    128    
-80    112    
176    -240   
-272   0      
592    -336   
-560   -80    
304    272    
208    112    
-256   -16    
-400   -624   
0      736    
-160   416    
80     -32    
-80    -160   
224    160    
256    -48    
112    256    
48     48     
-160   48     
352    96     
-304   0      
160    -1040  
304    160    
-608   -288   
256    240    
256    96     
-160   16     
-112   -64    
-80    128    
-64    48     
624    1008   
-528   -496   
-1152  -176   
1632   752    
-1712  -608   
-208   144    
640    -368   
-960   112    
480    -416   
96     -48    
-128   32     
208    176    
-48    80     
-16    320    
-208   16     
-96    48     
224    32     
-128   -416   
-48    -272   
128    32     
176    144    
-304   48     
1344   16     
-880   -160   
336    272    
624    624    
-800   576    
-224   -48    
736    -144   
64     16     
96     160    
-192   -240   
16     -288   
208    -64    
896    -144   
-608   192    
352    -112   
-192   224    
-192   -320   
512    -128   
-256   240    
352    96     
-144   32     
-96    -784   
-64    48     
800    112    
128    208    
-112   48     
-16    384    
2272   4928   
-1952  1008   
416    -1408  
1456   -208   
-880   -192   
80     288    
-272   48     
928    -1648  
-272   -208   
-16    112    
592    -560   
-496   -48    
304    288    
96     -432   
-160   112    
-64    -208   
192    96     
-80    -16    
96     80     
272    1504   
544    16     
-592   528    
240    -1408  
-48    -320   
-448   0      
816    64     
-384   192    
-32    -1328  
128    -128   
-48    -560   
224    -192   
-240   16     
-32    -112   
-112   0      
176    -176   
256    -128   
-128   848    
720    336    
-400   -80    
-1072  -192   
208    -32    
-80    -624   
320    -480   
-160   16     
16     -240   
176    -128   
-336   384    
464    -224   
-80    -288   
400    960    
224    512    
-304   80     
272    -224   
-496   224    
-368   -160   
-128   32     
112    400    
672    -656   
80     -512   
-32    -592   
96     -432   
-160   -1344  
16     -448   
80     64     
32     400    
0      -176   
-32    -512   
160    96     
96     -160   
-384   32     
16     -224   
-144   448    
64     672    
-64    192    
32     384    
-32    -80    
-64    -368   
144    -208   
240    416    
-64    0      
-96    112
[truncated: 320,011 more chars]
