# Supplementary material for: A Fault Diagnosis Method for One‐Dimensional Vibration Signal Based on Multiresolution tlsDMD and Approximate Entropy
Source: Hindawi journal article supplement (doi:10.1155/2019/3262818), 2019-01-01
Supplement: f1 [file 3262818.f1.zip › 3262818.f1/gear signals/pitch errors signal/Data19.txt]

-32    32     
-96    16     
32     80     
144    304    
80     -400   
96     368    
-288   272    
320    112    
192    160    
-192   80     
384    -272   
-64    -560   
-1584  928    
1344   512    
-112   -432   
0      944    
560    176    
-624   576    
-512   576    
288    -400   
272    -32    
-64    288    
-48    192    
-64    -192   
336    -384   
-256   -160   
80     64     
-16    320    
-112   144    
-112   32     
0      208    
-80    368    
-368   704    
1680   -48    
-1232  336    
864    -352   
-528   -640   
80     -592   
512    -608   
-368   -160   
304    592    
112    848    
96     816    
112    368    
-16    -256   
32     -624   
-624   -224   
0      224    
48     -96    
224    -160   
320    192    
-384   -144   
-80    288    
256    -64    
-512   -32    
64     416    
416    -368   
-256   256    
640    1520   
-688   1200   
-48    384    
544    -272   
80     256    
-352   256    
-192   -224   
368    640    
336    -32    
-336   560    
592    768    
-224   144    
352    48     
336    -768   
-432   144    
80     80     
-96    176    
208    0      
-128   112    
-224   176    
128    -96    
-368   272    
192    592    
-272   144    
592    -448   
-1680  -256   
384    0      
240    -416   
-112   -368   
-416   208    
-272   -2656  
416    1440   
496    432    
-208   288    
-288   -720   
320    320    
48     -64    
-240   768    
-48    -48    
-112   -48    
256    32     
0      -96    
64     416    
128    496    
176    704    
336    -128   
-128   -48    
-800   128    
608    176    
16     416    
112    -336   
-16    -624   
-288   128    
80     288    
80     -320   
48     48     
208    -320   
-256   208    
-64    -432   
208    -160   
-160   -464   
352    240    
-304   -432   
-272   -480   
416    -368   
-208   -128   
-96    -256   
-80    64     
0      160    
-32    464    
368    464    
160    0      
-224   400    
-16    -80    
-64    256    
208    -768   
624    -384   
-608   208    
-112   80     
64     144    
-48    32     
272    -304   
-240   -864   
48     -64    
80     -176   
-272   48     
128    -16    
208    112    
-160   -160   
-16    112    
0      -352   
-16    -80    
-208   -1136  
-176   -400   
16     0      
320    -336   
160    80     
-368   64     
-144   -1696  
336    -224   
-128   -2224  
32     -288   
224    128    
-128   0      
80     144    
960    32     
-2064  832    
1408   -96    
-192   -128   
336    -112   
-304   -464   
64     -304   
160    0      
-144   -560   
448    -352   
-240   -256   
-80    -240   
464    -256   
-112   -208   
160    16     
128    80     
-624   -384   
352    48     
-384   -288   
288    48     
128    128    
-1424  816    
1504   -336   
-1680  -160   
928    -320   
-80    -752   
-480   320    
752    -48    
112    128    
-304   -16    
-144   -16    
432    -96    
48     112    
-48    -48    
-64    80     
-64    -64    
-208   96     
0      -64    
-64    -96    
304    -48    
-144   -224   
-32    -32    
272    -416   
-256   -176   
272    -784   
-352   -48    
416    144    
64     48     
-368   -128   
432    -16    
1024   864    
-1040  1008   
80     192    
720    -64    
-976   -208   
416    -32    
-576   -256   
48     -368   
-64    48     
80     -336   
-32    32     
-176   0      
208    48     
-256   -64    
-64    -48    
368    48     
-96    64     
-384   -16    
368    -112   
64     16     
48     -144   
112    144    
-608   -688   
-128   224    
1088   -416   
-1424  -512   
624    -544   
336    208    
-464   0      
624    -144   
-32    0      
-80    0      
64     16     
96     -128   
-256   -64    
-16    -144   
-640   0      
272    -48    
-288   0      
272    -720   
-368   64     
-128   -1936  
48     -80    
208    448    
928    -80    
-1056  -96    
704    -48    
-384   -96    
-160   128    
16     272    
256    -160   
112    -208   
160    -192   
-240   -96    
16     -288   
48     -112   
624    -208   
-96    128    
-432   -32    
192    176    
224    -16    
160    -224   
80     192    
-80    -64    
-112   128    
48     -128   
-16    -112   
-400   -272   
320    48     
-288   -192   
0      32     
-656   -3136  
2080   -1776  
-1504  1008   
-1168  -208   
848    112    
-176   -80    
-128   -144   
352    240    
-304   -192   
-336   -288   
-960   -64    
624    -192   
32     144    
-192   -64    
96     -32    
-368   -320   
-384   -16    
-80    96     
-96    0      
112    320    
-192   528    
384    592    
240    32     
-608   -160   
416    -16    
0      176    
-1296  16     
864    -16    
-528   -240   
-272   -64    
288    0      
-368   -16    
448    112    
-336   48     
-112   160    
-480   -96    
-704   -80    
432    -240   
-64    -432   
-272   -208   
-64    64     
-16    -32    
400    -192   
-800   -432   
128    400    
240    544    
144    448    
320    512    
-464   224    
-176   -352   
-192   -448   
-368   -64    
-240   368    
-1104  304    
688    -192   
-480   224    
-112   -688   
272    -992   
176    -752   
-336   -272   
272    272    
-320   160    
80     80     
176    112    
64     240    
-208   144    
-96    -160   
80     160    
112    -48    
-32    -80    
-240   160    
-80    192    
160    144    
96     -304   
-224   48     
-144   -80    
-272   -48    
176    16     
-80    -128   
224    512    
0      -240   
-64    176    
128    512    
-704   880    
-176   -384   
304    -128   
256    432    
-208   112    
-32    -800   
-112   -944   
384    768    
-240   160    
64     80     
-256   -96    
-144   64     
432    32     
-336   -288   
-288   -352   
304    -144   
-656   352    
160    624    
-144   -160   
-288   304    
880    -592   
-1472  464    
1904   -176   
-992   -176   
304    528    
16     640    
-208   576    
128    144    
-240   -128   
-208   0      
176    272    
-80    144    
272    -176   
-480   -192   
-16    -64    
-112   96     
-48    160    
288    -304   
-144   128    
-256   240    
320    64     
176    304    
-176   80     
-96    208    
-144   368    
-16    144    
176    192    
192    432    
-320   -256   
512    912    
336    288    
-1760  -224   
1376   608    
544    960    
-1344  352    
272    176    
272    -368   
-416   48     
272    -560   
-368   -272   
-128   304    
-16    -48    
192    160    
-272   -176   
-208   0      
144    0      
256    192    
-16    -352   
-208   112    
16     448    
464    176    
-1632  -112   
752    -160   
-528   32     
-304   -96    
528    400    
-480   256    
-144   112    
272    -240   
-144   -400   
-64    -80    
-48    0      
16     304    
128    144    
-112   -80    
-80    32     
48     -64    
-480   -96    
304    112    
-192   112    
-160   160    
160    112    
-64    -224   
432    -448   
-224   112    
192    432    
-80    -192   
880    -160   
176    384    
-560   0      
224    80     
-80    112    
-112   80     
384    112    
384    512    
-976   32     
-32    -224   
384    368    
336    16     
64     416    
-864   192    
320    -144   
496    224    
-176   272    
-240   32     
-544   -400   
432    160    
64     176    
-432   -192   
-48    -64    
1488   2064   
-1440  1008   
560    192    
1648   496    
-1072  1776   
-96    224    
-240   352    
256    -544   
176    -112   
32     -112   
-192   0      
-176   112    
96     -112   
240    64     
-192   80     
208    192    
-112   160    
160    96     
-496   -672   
816    -1024  
-240   -208   
-16    176    
144    272    
0      128    
-448   32     
656    80     
-32    -128   
-80    -272   
-240   144    
256    -96    
-80    -224   
96     192    
-112   0      
160    208    
368    64     
-272   64     
-192   224    
480    864    
-80    768    
192    544    
240    64     
-160   320    
336    352    
-256   320    
-144   176    
352    -720   
0      -192   
-528   -240   
-16    -128   
160    -32    
144    -16    
-208   80     
-288   608    
960    48     
-448   -416   
-576   -208   
400    112    
240    -224   
-128   80     
0      -176   
-592   -352   
240    96     
208    -2384  
-16    80     
32     64     
-192   16     
272    336    
400    256    
-304   -64    
-96    592    
208    -16    
96     -48    
-96    112    
-64    -16    
0      -64    
96     32     
112    544    
-448   -128   
128    32     
240    96     
-96    176    
-64    400    
608    -768   
-944   608    
1872   -64    
-736   -48    
-304   160    
-176   -48    
752    -48    
-112   -96    
-448   -32    
256    48     
64     -224   
272    208    
-16    -2000  
-304   272    
304    32     
160    -160   
-240   80     
464    144    
-32    -112   
-256   224    
-1424  1120   
3024   -256   
-1440  -144   
-816   -400   
656    48     
-544   96     
1104   48     
-352   -224   
32     -16    
-752   208    
1040   48     
-176   48     
192    -48    
-560   192    
192    96     
208    160    
16     -176   
-80    32     
-384   -176   
448    16     
-112   -320   
160    144    
-112   -160   
32     80     
-448   -64    
592    240    
-144   16     
16     80     
-48    64     
528    1104   
3136   -512   
-1968  -896   
-400   112    
1680   -448   
-544   96     
-768   -80    
432    256    
528    32     
-176   -192   
-96    80     
16     208    
-32    -32    
144    48     
48     112    
208    -688   
-336   128    
176    -352   
48     32     
160    -128   
144    16     
-16    64     
-624   -432   
576    -544   
-400   -400   
480    -256   
-672   336    
912    160    
-640   96     
80     -32    
272    -160   
0      -512   
320    -48    
-48    -320   
-80    -160   
-32    32     
496    -336   
16     192    
-112   16     
48     -656   
384    128    
16     -192   
-16    -96    
352    -16    
848    -144   
-896   128    
400    -112   
-160   -64    
256    -640   
144    192    
-384   272    
-128   16     
256    48     
-96    64     
48     -400   
-144   304    
-256   -144   
128    144    
128    288    
-128   -112   
-448   -64    
96     -192   
-32    -144   
64     -672   
80     -32    
-64    -480   
16     -32    
-384   -256   
384    -64    
-16    -176   
-112   48     
-640   -688   
1744   -1344  
128    176    
-464   32     
-1472  -144   
560    208    
-192   96     
512    208    
-272   128    
80     -256   
-64    -288   
64     -1744  
-160   -112   
-80    64     
-48    48     
352    160    
-96    -224   
-208   16     
224    -176   
-176   -1024  
-448   -896   
-208   -80    
0      48     
16     -112   
592    -720   
-784   -48    
368    -1056  
-16    -128   
-192   -272   
256    -240   
-288   -256   
-16    16     
-48    48     
256    64     
224    -96    
-400   -256   
-256   -80    
-256   288    
208    -48    
176    -80    
-208   -32    
-144   -272   
640    32     
-384   -784   
32     -320   
-144   -1040  
64     -928   
-112   -160   
80     -64    
112    -128   
-304   256    
-352   -80    
880    -96    
-1536  576    
736    288    
-464   272    
336    -176   
288    192    
192    -528   
-112   -1120  
-416   400    
320    400    
-32    0      
80     -240   
128    -96    
-192   -32    
-32    -32    
128    64     
48     208    
-176   352    
-192   -32    
48     -464   
160    96     
0      -256   
-128   128    
-144   32     
144    -128   
64     288    
-32    -112   
-496   -16    
336    -80    
-32    -32    
-112   -16    
-320   -528   
208    -240   
272    560    
-48    -80    
-208   -192   
-192   -560   
544    -784   
224    96     
-16    160    
-480   -16    
-48    -192   
288    32     
576    112    
-496   -128   
-144   -128   
-144   448    
112    -16    
-80    32     
-304   80     
816    896    
-1040  128    
-16    -320   
912    -448   
-1008  -688   
192    240    
144    -512   
-544   -928   
224    -48    
592    80     
608    -128   
-480   64     
-400   -32    
224    32     
240    -336   
64     80     
-352   32     
-464   368    
224    144    
-48    -256   
-448   -304   
-800   256    
304    -80    
128    -480   
-224   64     
-272   192    
288    176    
176    80     
96     -192   
-432   -256   
-320   704    
880    -480   
-1312  32     
992    32     
-656   -480   
-496   -1024  
528    -608   
288    928    
-640   1616   
496    928    
-192   384    
-176   496    
192    -368   
112    16     
-656   -512   
-112   80     
544    -16    
16     -256   
-176   -448   
-128   -352   
80     -112   
64     -464   
-1760  704    
1456   128    
-1088  816    
256    160    
288    -64    
144    -272   
-704   304    
-16    160    
192    192    
112    -48    
-208   -96    
-576   64     
416    48     
-144   -192   
-544   240    
288    176    
-448   272    
656    80     
-576   -208   
-240   96     
64     160    
-304   144    
-240   -1552  
-1392  -320   
0      0      
64     80     
-624   -208   
624    16     
-480   272    
-448   64     
48     -128   
320    -144   
-32    192    
-64    288    
160    -80    
-416   0      
720    -80    
-240   112    
-272   -400   
-592   80     
400    0      
64     96     
-80    -64    
-160   208    
-304   48     
592    32     
-368   96     
-256   128    
64     976    
1440   2560   
-944   368    
-256   320    
1984   -128   
-1104  -144   
-528   64     
880    256    
-208   -320   
48     176    
-320   64     
-16    48     
16     48     
-64    0      
176    112    
-256   -16    
208    112    
-64    16     
272    64     
-528   -128   
176    240    
144    -224   
-320   -256   
304    240    
-576   32     
176    64     
320    144    
-128   144    
-96    -32    
48     128    
96     32     
-272   16     
112    112    
48     96     
-304   0      
432    -80    
-64    96     
-224   -96    
64     192    
-192   368    
96     320    
-48    -112   
96     32     
48     -32    
-160   240    
208    80     
0      128    
96     208    
16     48     
-224   256    
176    64     
-208   0      
32     128    
-336   -256   
16     64     
-256   240    
-144   -64    
416    48     
-64    -128   
-128   128    
16     128    
-368   272    
400    192    
96     32     
-176   64     
128    176    
-64    96     
64     -144   
128    -112   
112    32     
-128   -112   
-144   -48    
0      320    
16     32     
-32    128    
176    128    
-208   320    
96     208    
96     -80    
-48    224    
192    0      
-48    144    
-480   -640   
1520   528    
16     48     
-656   64     
-480   288    
48     -16    
32     16     
128    80     
256    560    
-64    -112   
-256   -32    
-48    112    
192    -16    
-192   160    
-80    272    
480    16     
-304   32     
-80    208    
128    -16    
80     32     
-64    96     
-1088  64     
1328   -736   
-1040  -96    
-608   -112   
1136   224    
-448   16     
672    32     
-304   128    
-688   -16    
336    32     
464    240    
32     -96    
-416   96     
48     -32    
272    96     
32     80     
-272   -368   
-208   224    
416    80     
-32    112    
-32    48     
-160   32     
48     128    
96     224    
-16    -32    
208    288    
-256   -80    
0      144    
160    -80    
-304   272    
992    -80    
-432   304    
704    112    
-352   -384   
832    144    
-1120  256    
336    224    
656    176    
-96    0      
-112   64     
-144   160    
240    -192   
176    144    
176    64     
-576   128    
256    128    
-32    -832   
272    -64    
-208   -2976  
32     0      
80     192    
-720   -80    
864    -288   
-432   -288   
160    -208   
-272   448    
240    -176   
-48    32     
-272   48     
32     -144   
176    64     
128    -32    
-112   80     
-160   -80    
112    -32    
-176   48     
272    112    
-256   -16    
208    368    
-288   128    
32     -80    
48     -48    
-240   112    
464    -192   
-496   -352   
688    -80    
-368   224    
512    0      
-144   -640   
-192   80     
-112   -1776  
288    -224   
672    -272   
-560   112    
272    32     
272    352    
-560   176    
128    -16    
464    144    
-192   16     
-64    112    
-112   -80    
160    144    
128    -128   
-80    48     
32     -1184  
272    64     
-176   128    
416    48     
-304   -352   
192    -416   
-112   816    
704    -16    
-1216  192    
80     112    
240    -208   
960    -384   
-304   224    
-592   -80    
-256   -80    
624    -224   
0      -224   
0      112    
-352   48     
224    224    
384    -112   
-464   -16    
-48    -352   
-256   64     
496    -176   
-80    64     
160    64     
-96    208    
-368   -384   
480    -96    
112    192    
-352   176    
-48    -496   
560    224    
144    1168   
128    0      
-288   32     
48     -256   
240    16     
272    -304   
-560   -512   
-64    -96    
-16    16     
176    -1040  
-112   -144   
144    48     
48     -16    
-48    -144   
96     -1088  
80     -48    
256    -1344  
-416   -944   
160    -1344  
240    -1696  
-128   192    
112    -192   
128    -32    
576    656    
-672   480    
-192   144    
992    16     
144    -544   
16     32     
352    832    
-400   96     
64     -1280  
624    -336   
-224   192    
-176   -64    
-64    -480   
224    -336   
320    -112   
-176   -1488  
-144   448    
-16    240    
256    -464   
-272   96     
80     -16    
-128   -256   
240    16     
-288   16     
32     -464   
-768   32     
32     -176   
16     -80    
288    -112   
-240   -16    
-368   -288   
544    -800   
416    -368   
128    240    
-272   -16    
-144   80     
32     -464   
592    -1200  
176    -336   
-80    32     
-592   -64    
-112   -224   
192    -240   
224    -144   
0      -32    
144    -144   
-160   160    
-160   -352   
80     96     
16     48     
224    608    
224    -224   
-1408  480    
1904   -176   
-624   400    
-512   624    
192    240    
-16    224    
96     368    
16     -208   
288    -400   
-64    16     
-176   -640   
-128   208    
432    -32    
240    176    
-208   -64    
-432   640    
336    -880   
176    256    
-496   -416   
48     144    
16     -64    
224    -16    
80     -64    
-160   -192   
-128   -48    
336    -16    
64     96     
-64    -624   
1520   528    
-1792  1488   
-160   -448   
208    -592   
112    -464   
-976   -320   
752    -848   
-528   -272   
-352   -336   
288    -16    
96     -208   
-208   32     
224    -336   
-48    -128   
-288   -1120  
-48    64     
16     -32    
304    -48    
-192   -64    
64     96     
-400   -96    
400    -112   
-1680  480    
896    -512   
-112   -416   
-208   -368   
0      -32    
192    -448   
-144   208    
-96    -1024  
336    128    
464    80     
-352   -16    
-448   -64    
16     -192   
128    96     
208    32     
-240   -96    
0      112    
224    32     
32     -80    
80     96     
-192   -384   
560    352    
80     -224   
128    64     
-240   112    
768    -128   
48     384    
192    -16    
0      0      
192    112    
272    224    
-48    144    
-304   64     
448    -160   
-336   288    
-464   64     
112    224    
112    32     
-224   -32    
-32    48     
-384   -48    
-32    96     
336    -32    
-144   -64    
272    -144   
-208   -128   
-1200  -208   
416    -16    
-64    -192   
16     -32    
-1968  -976   
1280   192    
576    -32    
-176   -80    
-704   544    
-320   -16    
128    272    
32     176    
-864   144    
688    -112   
-144   144    
96     -96    
-96    144    
-128   0      
464    144    
-240   -160   
96     -96    
-272   64     
480    240    
-560   448    
832    16     
-432   128    
-1360  -128   
560    48     
736    -16    
-256   48     
-528   -192   
272    48     
176    -160   
-320   0      
192    -176   
-464   48     
256    176    
368    128    
-480   80     
-176   0      
112    -32    
-448   -128   
64     112    
-336   -48    
144    64     
160    -32    
-240   96     
16     64     
160    336    
528    208    
-384   128    
48     128    
224    80     
-208   -64    
-16    16     
-432   80     
272    128    
-320   960    
528    -208   
-624   208    
-544   -48    
496    240    
-288   -48    
-144   160    
352    80     
-96    96     
-208   -64    
48     0      
112    128    
-240   112    
176    -240   
-112   -96    
-32    128    
-208   32     
32     144    
-48    48     
-64    96     
112    -64    
0      -256   
-80    784    
-576   288    
304    -192   
176    368    
-160   368    
864    1904   
-1584  -704   
-112   -16    
1504   -304   
-1008  -160   
-128   416    
-32    -48    
400    288    
-224   -64    
-128   128    
464    32     
-256   112    
448    -128   
-352   160    
224    -80    
-192   320    
288    -112   
64     64     
-576   176    
64     -48    
288    224    
-1504  896    
2592   80     
-1264  -448   
-1280  -16    
1280   208    
-112   64     
16     48     
-320   368    
240    -16    
-368   16     
448    32     
-48    -16    
-336   160    
128    -48    
144    176    
-224   -16    
128    -80    
-96    -16    
256    16     
-128   48     
208    48     
-176   96     
-208   96     
352    64     
-512   -64    
304    272    
96     -48    
-240   112    
0      -48    
-752   -1488  
2032   112    
-448   -304   
-1152  -96    
2080   544    
-1008  -400   
-224   32     
608    -16    
-544   96     
-208   -48    
96     144    
160    16     
-128   16     
-160   80     
288    -32    
-272   0      
80     160    
192    112    
-528   240    
240    -176   
144    128    
-192   352    
-16    640    
1296   -352   
-368   768    
-320   448    
128    16     
368    -48    
-112   208    
80     32     
-144   128    
240    80     
112    32     
-96    48     
-96    -96    
304    96     
-16    112    
-16    96     
-64    -48    
16     160    
-240   16     
160    96     
-112   -80    
80     128    
352    -48    
288    112    
-160   400    
384    192    
128    48     
-368   288    
160    -64    
576    -48    
-320   64     
320    -64    
-96    -32    
336    96     
-416   128    
624    -272   
-416   192    
-368   96     
224    -1264  
256    112    
0      32     
-176   64     
-80    208    
192    -32    
176    448    
-48    -48    
0      192    
608    160    
-720   304    
256    48     
-352   1040   
592    -112   
-1072  48     
112    -624   
608    144    
-80    496    
-384   -784   
160    -32    
-48    -208   
240    272    
160    144    
-368   336    
96     48     
-240   -336   
512    368    
-448   -208   
112    -320   
176    208    
-144   -48    
96     160    
0      -32    
-16    80     
176    112    
224    512    
-32    368    
-32    400    
48     -48    
48     272    
-160   320    
368    192    
-240   208    
-176   -192   
-48    -32    
-32    -224   
208    -96    
-144   -672   
576    816    
-512   848    
-144   -672   
432    -272   
-32    64     
-96    96     
-224   144    
112    -32    
448    336    
-176   544    
-64    -16    
16     224    
272    -688   
160    432    
0      -32    
464    -112   
-880   160    
48     -128   
16     416    
144    -336   
-80    -464   
112    -832   
-736   -848   
192    672    
416    -80    
112    -80    
-112   336    
-176   -640   
272    -96    
112    -288   
32     -304   
-336   -1232  
176    240    
64     -144   
-80    -96    
0      224    
-64    416    
-64    288    
96     -80    
-144   -368   
480    -624   
288    320    
224    -32    
-272   80     
-16    -272   
976    576    
-1168  144    
608    -480   
-16    64     
240    -272   
64     48     
192    736    
-368   864    
32     736    
304    32     
48     -816   
-368   224    
80     -288   
288    112    
112    -224   
304    32     
-240   -16    
-224   160    
64     -176   
160    -112   
784    112    
-1312  544    
544    96     
-64    112    
-80    -272   
416    16     
-592   -112   
48     -192   
576    -48    
-64    272    
-224   112    
-80    -160   
-16    48     
272    368    
64     64     
-64    -192   
-48    64     
-32    64     
336    272    
48     288    
16     -64    
-128   144    
240    -80    
-160   224    
416    288    
-128   288    
-272   -144   
176    144    
96     80     
-128   -480   
480    -1264  
-1072  -672   
576    -1616  
-528   -272   
16     -2144  
816    64     
-1056  -1168  
400    -64    
192    176    
80     -192   
-224   16     
-48    16     
256    -560   
64     320    
-112   -432   
-80    144    
-160   -192   
224    -128   
-16    0      
32     -16    
240    -32    
96     368    
176    -576   
-800   -240   
976    -96    
-160   -240   
-432   256    
192    -160   
192    176    
304    -352   
48     112    
-352   0      
-224   -80    
224    0      
128    -64    
176    -96    
-384   -192   
304    176    
32     -1232  
416    -144   
208    48     
-416   224    
-176   -192   
112    240    
848    -288   
-80    -256   
-624   -32    
-432   -96    
-512   -304   
960    -480   
-160   -288   
80     -272   
-192   -96    
544    -304   
-16    -64    
-256   -784   
-112   -16    
80     -320   
320    160    
-288   -64    
-224   112    
16     32     
96     -112   
-336   -32    
-96    96     
-752   -64    
-96    -240   
576    -144   
48     -64    
-16    -96    
-160   -432   
1136   -672   
-2272  -384   
1504   -112   
-272   -176   
112    160    
-320   0      
32     -16    
64     96     
-192   64     
64     -80    
96     368    
-64    64     
-352   -176   
-32    32     
368    -240   
-256   112    
176    208    
-144   80     
-96    -112   
-336   -192   
544    448    
-672   208    
240    -32    
656    16     
-752   32     
448    -32    
-48    64     
-736   -176   
944    112    
-304   -240   
112    96     
-416   -1232  
352    144    
-240   -128   
256    176    
592    -16    
-384   160    
-304   -80    
240    -48    
416    0      
-240   64     
32     -16    
48     -32    
-128   0      
448    -144   
304    144    
-624   -1008  
448    -416   
64     -16    
192    128    
112    160    
-400   32     
544    160    
-1024  32     
640    0      
64     112    
-400   -112   
288    -208   
-16    224    
352    -288   
-432   208    
144    80     
352    96     
-160   -16    
112    0      
-368   144    
-96    16     
320    16     
128    -368   
-304   0      
-16    48     
-128   96     
-240   -368   
-64    192    
-112   -128   
64     96     
-128   176    
-368   224    
80     -16    
-96    112    
-256   400    
-464   -1040  
1568   -288   
-416   96     
-544   64     
-928   -48    
-336   -64    
16     -64    
144    176    
144    112    
-848   112    
288    -208   
-176   48     
-160   32     
-48    80     
-432   -96    
128    48     
-480   192    
384    -304   
32     -128   
-240   -16    
240    128    
1392   -272   
-2704  352    
960    -224   
256    176    
-240   96     
336    32     
-416   16     
-272   48     
-256   -16    
288    -48    
-144   0      
-576   -32    
16     144    
256    -48    
-96    -32    
272    -96    
-512   16     
208    32     
-80    112    
304    -64    
144    112    
-896   128    
576    144    
-96    -32    
-176   16     
0      96     
-224   96     
64     48     
144    48     
-224   -560   
-880   -2144  
384    368    
192    -224   
-512   176    
272    224    
272    -112   
-928   288    
288    144    
-32    -144   
16     16     
80     64     
-352   32     
48     128    
304    192    
-144   224    
48     64     
64     32     
-128   -32    
-16    -80    
-80    32     
-128   64     
-304   -896   
-48    32     
832    304    
-1728  640    
656    -96    
-64    -1168  
-448   112    
-160   368    
-176   -128   
368    16     
16     192    
-160   0      
-80    80     
64     -64    
272    224    
192    192    
-128   -16    
-64    224    
-80    -32    
32     112    
-144   -80    
-64    240    
192    528    
-192   224    
-64    -48    
320    32     
-32    -160   
-320   48     
320    -16    
16     112    
-16    128    
-192   48     
272    -96    
-272   64     
-480   400    
288    -848   
-128   544    
-288   496    
-192   -80    
144    144    
224    32     
-272   112    
176    160    
-208   144    
-32    16     
-144   -128   
-256   -64    
-352   48     
336    -368   
96     80     
288    544    
432    -160   
-464   368    
1600   -240   
-1360  -64    
-128   240    
208    -96    
608    288    
288    208    
-416   -800   
-208   -208   
32     560    
560    -192   
-112   -160   
-96    384    
-240   240    
368    0      
-96    -128   
-64    -112   
-176   96     
-64    -304   
288    -416   
64     208    
-800   368    
560    144    
512    368    
-416   320    
416    -288   
-1088  -1536  
544    -160   
-112   256    
-64    -256   
144    0      
-128   -544   
-144   -496   
256    352    
-240   656    
-448   32     
0      -80    
608    272    
-96    128    
-144   32     
-208   -96    
0      -80    
144    224    
-16    512    
32     496    
-144   112    
336    -224   
-320   128    
-48    304    
-144   -400   
720    -464   
-352   -32    
32     112    
-192   208    
128    176    
160    208    
272    544    
-192   1312   
128    -272   
0      -208   
16     160    
-80    96     
-128   192    
160    464    
112    400    
288    336    
-176   -16    
-208   -160   
176    320    
-32    336    
192    -96    
-32    64     
32     -64    
-80    160    
176    784    
-320   896    
192    -320   
-32    -352   
-208   160    
-32    400    
-64    -512   
512    128    
208    160    
288    -864   
544    -16    
-128   -16    
-192   -96    
-256   -352   
208    192    
192    -2976  
-80    288    
176    96     
-128   80     
192    176    
448    48     
-656   240    
272    144    
176    -16    
160    16     
-784   16     
848    32     
-576   80     
464    -160   
304    432    
-256   320    
336    -208   
-288   -160   
368    0      
-272   16     
64     128    
224    160    
112    80     
-208   256    
240    96     
-256   16     
-176   656    
192    -192   
576    -32    
-624   128    
352    -736   
0      128    
128    416    
-208   80     
32     -16    
272    96     
-160   16     
96     112    
-160   -400   
0      -176   
-256   48     
1776   -480   
-2240  624    
912    -288   
864    320    
-560   -352   
-240   -208   
624    -464   
-288   -368   
-288   48     
224    16     
-144   192    
208    48     
-16    64     
-48    176    
128    176    
144    48     
112    64     
-256   -160   
96     144    
-48    -112   
48     304    
-256   336    
1104   -416   
-736   272    
96     -16    
-432   64     
368    176    
-160   80     
-32    -32    
16     -48    
-32    160    
144    128    
224    -80    
-128   96     
-240   -48    
304    96     
-96    -1232  
496    64     
-96    -1248  
96     -32    
-272   32     
-288   -128   
1120   112    
672    704    
-1248  0      
-592   -192   
352    -16    
208    -80    
288    64     
-176   -240   
-368   288    
288    -192   
352    96     
-576   -192   
-128   160    
496    64     
192    288    
-288   64     
-400   144    
-32    -112   
528    -464   
-32    -112   
-112   -1152  
80     160    
464    -48    
288    112    
-1264  -192   
272    -176   
512    80     
-512   -352   
1136   2624   
-48    704    
-80    -48    
624    -384   
-1040  -16    
320    32     
320    304    
400    -496   
144    144    
-48    -304   
-944   208    
752    96     
-112   -16    
224    -272   
-192   -256   
192    128    
-560   -864   
496    96     
192    -832   
-304   -656   
-672   -128   
960    -976   
-448   96     
1024   144    
-736   -96    
336    128    
64     -320   
-240   224    
240    -96    
64     0      
-224   -32    
-224   -64    
320    0      
-464   48     
384    -304   
96     96     
48     -256   
-480   -112   
576    -240   
-176   -112   
-16    -2352  
32     -80    
64     192    
-16    16     
-144   208    
544    224    
-112   -144   
-224   0      
-576   -432   
400    -672   
-928   -144   
-192   -160   
352    -352   
-832   -176   
896    -80    
-464   -800   
208    -96    
448    -128   
-304   160    
-128   32     
-16    -48    
384    -176   
32     0      
-224   -32    
48     256    
-960   128    
80     -256   
64     -352   
32     -288   
-80    -256   
64     -128   
0      16     
-16    -128   
144    208    
176    0      
48     304    
-320   16     
96     -32    
208    -256   
-48    -240   
-176   112    
-96    96     
-48    1248   
1264   -288   
-1696  -208   
-192   -304   
192    32     
704    -1520  
-400   112    
-288   -48    
80     176    
240    -80    
-112   -80    
128    -272   
-144   -32    
352    -384   
-32    128    
-1168  96     
912    -448   
-96    288    
-320   -192   
-176   16     
1440   272    
-2096  0      
608    400    
544    112    
-1152  -272   
752    -16    
304    -336   
-400   -128   
-464   -64    
608    -112   
-224   176    
-64    16     
0      -112   
-16    -192   
64     80     
64     -16    
144    112    
-416   -1472  
256    -192   
32     64     
-192   288    
-144   160    
304    224    
-240   64     
384    112    
-560   80     
-64    -368   
0      64     
-32    -112   
80     160    
784    -176   
-2048  592    
1456   -16    
64     -496   
-656   -128   
400    96     
384    640    
-672   560    
-32    -112   
320    -96    
-128   0      
-144   -144   
16     96     
224    -144   
-528   -16    
304    -416   
32     64     
-240   -16    
160    0      
32     64     
-16    64     
-528   -832   
-144   384    
1328   -528   
-1328  64     
352    432    
560    16     
-480   416    
-208   -112   
80     48     
64     -192   
-80    352    
112    160    
-848   304    
176    128    
-64    96     
-96    64     
64     48     
-256   368    
432    64     
80     128    
-240   -208   
-144   -32    
-32    48     
-480   -112   
432    64     
-192   256    
-448   -832   
-144   -64    
-96    16     
-624   -288   
608    -224   
-624   112    
416    16     
-464   -176   
64     224    
-176   -272   
-368   272    
560    352    
-624   240    
-144   -112   
656    224    
-192   128    
-80    224    
-112   48     
224    112    
160    48     
-464   -64    
-80    336    
-32    16     
32     16     
576    1008   
-64    288    
-32    -256   
896    144    
-144   656    
-624   272    
240    64     
400    -400   
80     304    
-544   -416   
-144   48     
32     -336   
768    64     
-736   240    
-240   176    
464    0      
112    496    
0      16     
208    -368   
-224   -288   
-32    -112   
96     208    
304    0      
-1184  -160   
944    -224   
-368   -304   
-704   -384   
224    -848   
-800   -960   
416    -112   
-624   -240   
368    32     
128    0      
-208   0      
-240   -288   
-96    -272   
288    16     
-320   480    
160    624    
-32    -48    
-128   -128   
352    -208   
-256   -128   
-288   -400   
128    -144   
0      336    
336    -416   
-528   -208   
192    592    
-304   -64    
16     -336   
144    -304   
256    -528   
-976   400    
-304   -656   
2288   -784   
-992   544    
-192   432    
32     320    
272    -192   
-240   32     
-256   288    
-160   0      
112    -112   
48     192    
48     32     
-272   -48    
96     0      
128    144    
-96    80     
-288   320    
80     320    
0      464    
-80    240    
192    352    
-32    -112   
-224   96     
176    528    
208    464    
-112   16     
-112   224    
-320   -592   
944    -1008  
-304   656    
608    -144   
-384   -80    
144    800    
-464   688    
560    560    
-480   144    
-240   -144   
0      -144   
64     224    
-32    80     
96     320    
-48    -128   
144    128    
-400   160    
128    144    
208    -64    
-112   176    
-160   128    
-864   1344   
1392   -208   
-1232  80     
992    -128   
-560   -48    
64     160    
320    96     
0      96     
272    -272   
-720   176    
656    -16    
-16    48     
48     -32    
-368   112    
80     -160   
272    144    
-304   -160   
176    32     
-480   48     
512    -48    
-224   128    
48     64     
-192   16     
-96    144    
192    128    
192    240    
-128   64     
-192   -16    
144    144    
-320   -992   
1552   -528   
-1280  368    
496    16     
944    256    
-624   -16    
144    224    
-80    480    
-96    112    
176    48     
-208   -32    
80     192    
-128   0      
112    96     
-16    160    
80     64     
-96    160    
-64    16     
32     48     
64     128    
-32    80     
0      176    
-624   -320   
416    -208   
-80    -224   
64     -336   
-528   608    
592    288    
-32    0      
-176   16     
-320   -32    
112    64     
672    176    
-64    32     
-208   48     
-80    176    
-240   48     
352    -32    
48     176    
432    144    
-448   -48    
-656   80     
160    -208   
640    128    
624    160    
-448   272    
-16    -80    
-368   144    
176    -1296  
-528   -80    
-240   736    
-352   336    
-112   96     
288    432    
-672   176    
-352   112    
240    48     
464    304    
-448   80     
-480   144    
96     176    
-240   -416   
352    48     
0      -208   
-16    -64    
0      176    
352    112    
-240   160    
320    -48    
80     64     
96     112    
-1392  -2096  
2528   -1472  
-1600  160    
-352   -528   
960    160    
-928   -336   
16     48     
496    -48    
-256   48     
256    336    
32     16     
-256   48     
208    0      
-96    144    
304    80     
-64    64     
-288   112    
80     16     
-48    144    
816    176    
-944   -192   
832    288    
-224   -384   
0      -96    
304    -560   
-96    48     
-160   144    
288    144    
208    208    
-256   176    
32     144    
0      128    
368    -32    
-144   32     
176    -32    
-640   -224   
176    96     
128    -448   
64     -80    
0      -512   
-160   96     
240    -768   
-128   128    
224    0      
240    192    
-208   32     
64     32     
-144   -64    
144    -144   
-144   16     
-80    48     
320    256    
176    512    
-448   208    
336    -48    
-112   0      
304    -1952  
240    80     
-272   80     
48     96     
208    240    
32     288    
0      80     
176    -272   
-48    -224   
208    -656   
-160   -192   
-160   -608   
80     -48    
224    -624   
-192   128    
-16    -112   
-16    192    
192    144    
16     112    
-112   48     
-96    16     
32     -224   
192    -192   
176    688    
96     48     
32     0      
208    -1344  
-800   896    
1104   -272   
-48    -64    
240    416    
-304   336    
-336   32     
368    512    
160    128    
528    288    
-640   -80    
256    -176   
208    80     
304    -496   
-336   -288   
-32    48     
240    320    
-80    -512   
80     496    
0      -160   
-432   -1056  
1312   -16    
-672   -288   
-688   560    
432    144    
-352   -576   
-48    -96    
-80    208    
64     416    
656    -848   
-48    144    
-288   592    
-352   192    
576    -432   
96     224    
-224   -384   
-192   -208   
656    64     
-112   -208   
-960   -112   
-112   192    
144    -384   
80     -48    
-16    96     
-160   80     
64     48     
160    -2016  
-96    -304   
-16    -224   
160    320    
-480   -736   
1952   -1072  
-1232  784    
176    -992   
352    -1184  
-192   -16    
-128   352    
544    -160   
-864   -1424  
48     304    
128    608    
16     -816   
112    -272   
-48    192    
64     224    
-96    0      
192    32     
112    -112   
-304   -32    
64     -32    
272    -240   
176    -16    
-1904  128    
752    -192   
-560   -704   
736    -1200  
-112   -1456  
80     -752   
-32    -1296  
-448   -512   
272    -560   
-272   -560   
-48    -320   
176    128    
-304   304    
-256   -224   
272    -160   
-144   -384   
-240   -528   
-80    -272   
-144   -208   
112    -320   
-16    32     
144    -1200  
64     1056   
-400   336    
-64    -336   
400    -208   
512    -80    
-496   -48    
48     112    
-96    -96    
192    -80    
-864   -64    
48     64     
-512   112    
352    -272   
192    -48    
-176   -656   
0      288    
576    64     
-96    -144   
-160   80     
-32    -112   
176    448    
336    -144   
-160   -80    
-784   208    
-288   32     
208    -80    
560    160    
-800   -1504  
928    -1488  
688    -224   
-160   48     
-624   -1712  
400    -1008  
0      -720   
672    80     
-704   -256   
-208   -240   
352    -176   
80     560    
64     -176   
-384   -320   
80     -16    
352    -64    
-272   544    
48     -128   
-416   256    
448    96     
112    128    
-144   -48    
160    112    
-144   96     
-768   -336   
1296   176    
-896   320    
-64    48     
-64    -144   
304    352    
256    -96    
-416   448    
240    -112   
-80    96     
-128   0      
224    32     
240    64     
-208   -208   
-128   144    
288    96     
-128   336    
-96    320    
64     368    
16     0      
-64    48     
-704   -368   
192    32     
-944   -80    
-192   80     
96     464    
-368   128    
64     -32    
-720   -224   
288    -368   
112    -16    
-160   576    
832    320    
-1024  416    
-272   -288   
240    336    
-96    -336   
-368   80     
-272   -80    
112    -64    
336    -32    
-144   128    
-304   -16    
-208   -208   
224    128    
-384   288    
0      -80    
-240   -160   
-272   -32    
336    -368   
32     32     
16     112    
0      160    
-352   176    
192    -48    
80     -112   
-272   -112   
-144   208    
-128   1728   
1520   -48    
-1616  32     
464    -80    
-48    -272   
432    -80    
-272   -16    
112    -176   
-560   16     
352    48     
-160   64     
-64    96     
-224   -32    
64     -128   
-96    112    
48     -288   
-144   0      
-416   -64    
-416   -256   
64     -112   
1776   192    
-2528  352    
768    272    
-320   -176   
-320   192    
1232   80     
-1168  48     
-64    80     
-208   32     
688    16     
-192   32     
-576   0      
-240   96     
528    80     
-512   -48    
416    32     
-592   16     
144    -32    
-512   -48    
880    16     
-304   160    
-160   80     
-160   16     
-16    -32    
304    -16    
-176   80     
16     240    
48     48     
-272   96     
-400   -896   
1648   3008   
720    -80    
-1616  512    
176    -224   
-624   -144   
688    64     
-160   -32    
-48    192    
272    16     
-736   16     
416    96     
224    80     
-48    -16    
-16    -48    
-576   -192   
336    160    
-608   -32    
32     32     
-32    48     
-16    -16    
-112   96     
128    -416   
-688   464    
352    48     
-896   -416   
704    160    
64     128    
-704   48     
48     -80    
80     -96    
-160   48     
-224   112    
16     16     
96     32     
-48    48     
64     64     
-320   128    
208    32     
0      -160   
-96    160    
32     112    
-48    48     
-256   -400   
-576   368    
624    16     
-1024  96     
416    -48    
160    -368   
1008   -192   
112    -144   
-400   160    
512    80     
-208   -48    
192    80     
112    -96    
176    -416   
160    48     
-64    144    
368    112    
-528   48     
128    112    
-240   96     
224    128    
48     32     
-48    96     
-32    32     
112    240    
-80    16     
-208   -16    
48     80     
336    192    
-1024  2336   
816    -720   
-1712  208    
240    -320   
816    -368   
-368   64     
-80    336    
-288   208    
320    48     
544    96     
-176   -32    
80     128    
-480   112    
224    -16    
208    96     
32     96     
-304   0      
368    96     
-576   -560   
576    -656   
-256   144    
32     272    
-304   64     
-352   -96    
32     -128   
528    80     
0      240    
-128   -176   
-208   16     
64     64     
112    32     
-160   -160   
192    -64    
-256   256    
208    16     
-400   -64    
176    -96    
160    -336   
-256   -96    
176    64     
-80    -80    
144    -144   
-32    -208   
-144   -144   
128    -224   
-48    -32    
160    48     
-80    112    
-560   -144   
112    -448   
480    -512   
-208   -448   
352    -256   
-784   1040   
624    320    
560    416    
-560   384    
-48    544    
144    240    
304    -384   
-96    176    
-256   224    
-32    -912   
-80    352    
304    80     
192    -16    
-208   16     
32     192    
-48    320    
208    96     
160    192    
-112   -16    
-128   112    
112    144    
288    -560   
-176   -112   
-96    -176   
176    -768   
-256   -672   
384    -304   
16     96     
-48    128    
320    672    
-256   144    
64     32     
-368   464    
-176   0      
112    0      
320    624    
80     -16    
-96    -80    
-256   -240   
160    256    
304    352    
-352   -272   
-48    128    
256    176    
112    352    
-160   192    
-32    80     
-160   176    
-128   208    
-192   864    
1984   -464   
-1744  784    
-16    576    
416    -48    
192    -464   
352    -480   
-320   -1440  
-32    -496   
240    -80    
304    320    
-96    64     
-368   144    
-96    -144   
368    96     
-48    -240   
-144   240    
160    64     
-128   -192   
112    -176   
-128   -576   
112    48     
96     -544   
-128   16     
288    -752   
-32    80     
336    0      
-64    144    
-512   48     
416    144    
-1472  928    
2704   -304   
-688   -224   
-560   -528   
736    896    
592    -80    
-112   416    
-32    1344   
-240   576    
128    -1264  
288    16     
-288   -1280  
-16    336    
224    96     
160    48     
32     -16    
-208   -96    
176    176    
16     -96    
208    400    
-224   -800   
1072   192    
-1680  0      
704    384    
784    592    
-672   1424   
-400   736    
560    672    
336    -80    
-288   16     
384    304    
-48    336    
64     128    
208    0      
304    256    
-448   -80    
208    16     
-192   -496   
-192   -96    
128    -32    
-288   144    
160    -128   
224    -128   
240    -64    
-112   144    
-1168  48     
368    -16    
-368   -176   
464    -464   
48     144    
-16    -336   
-96    240    
592    -48    
-544   272    
16     112    
128    32     
-320   80     
624    16     
-672   0      
-160   -1136  
0      80     
-160   -96    
-16    -272   
128    -336   
32     -1568  
208    -144   
-336   400    
-32    -32    
32     160    
-32    208    
-80    -1376  
608    -864   
480    -688   
-1040  144    
-336   112    
656    -192   
-896   -368   
416    -112   
-464   -80    
-144   -96    
144    -64    
352    -144   
-352   -48    
-64    -16    
304    -160   
272    -448   
-80    0      
-224   -32    
224    32     
-336   240    
368    976    
-128   816    
-240   -304   
528    176    
-192   -64    
-160   160    
496    -688   
-944   -240   
784    -1920  
-400   464    
512    128    
368    144    
-528   -48    
304    -160   
-64    -176   
112    -96    
-464   -16    
-112   0      
-176   -112   
192    -64    
-288   -160   
-48    -432   
-64    -256   
384    -1344  
32     208    
160    16     
0      176    
-176   -112   
288    -16    
-320   -160   
-80    160    
384    112    
-16    128    
-1104  368    
528    -224   
-208   -320   
-272   160    
928    16     
-64    -80    
-16    496    
-304   -352   
352    64     
144    -288   
-112   0      
-240   112    
0      144    
192    32     
208    -384   
-432   -144   
-48    304    
-384   -112   
288    -32    
-144   144    
32     -16    
64     80     
96     -896   
64     128    
112    48     
-304   -16    
96     32     
160    -48    
-96    -48    
-352   -1648  
-1184  400    
1280   -80    
-1632  -368   
560    -80    
48     -192   
-400   -240   
48     -16    
576    -656   
112    80     
-192   128    
32     -16    
-16    -96    
1120   -48    
-1520  0      
112    -64    
512    176    
-128   16     
208    -224   
-192   -128   
-576   -464   
1696   -352   
-304   288    
-976   160    
1152   96     
-1120  -80    
-64    -240   
304    160    
368    16     
-192   -32    
-336   16     
368    64     
0      -128   
-640   -16    
128    -160   
-432   48     
-80    176    
688    128    
-1344  -464   
464    -80    
-656   -16    
528    0      
-272   32     
272    96     
-160   -112   
-528   -32    
432    0      
-352   -48    
224    -16    
-32    -64    
1344   -160   
-4912  1072   
1040   448    
704    16     
-464   -144   
-128   -48    
-96    -224   
-240   -224   
-432   0      
240    -96    
128    96     
-176   16     
-544   0      
128    -32    
-352   -224   
0      112    
-16    -48    
-144   96     
160    -16    
-240   64     
112    80     
-352   240    
-400   304    
736    -336   
-496   -32    
-688   16     
-256   176    
-64    112    
576    576    
-656   -48    
-80    0      
176    -32    
224    32     
16     80     
-224   -16    
128    48     
-224   -16    
144    -16    
-144   96     
-96    -80    
192    -128   
-208   96     
-464   -352   
528    80     
-192   -288   
-272   48     
176    -112   
-16    384    
-288   -32    
-16    80     
352    80     
-304   80     
-368   -16    
224    -16    
-80    48     
-320   -64    
-48    192    
-32    -32    
496    272    
-320   48     
-128   144    
416    -112   
-224   -16    
-96    64     
-272   -48    
96     144    
208    -48    
112    -128   
-208   16     
0      48     
-176   -96    
48     -208   
-176   848    
1392   144    
-2432  -336   
112    64     
1168   -160   
-32    -112   
-272   160    
-352   144    
-176   -80    
432    192    
64     -128   
-512   -16    
-96    80     
-48    -48    
208    80     
-496   0      
64     64     
-928   -64    
672    816    
-384   1024   
-64    1152   
384    240    
-496   -176   
800    352    
-528   416    
192    48     
240    192    
80     464    
-240   656    
16     400    
304    -464   
48     -16    
-368   -176   
-384   -240   
-48    0      
544    80     
-816   -272   
464    0      
160    640    
-160   384    
144    128    
-48    -80    
128    160    
-272   112    
208    160    
-176   -1024  
-464   -480   
-48    32     
-48    896    
16     -16    
-16    16     
48     528    
-336   -160   
-144   -192   
720    416    
-144   448    
-176   80     
32     -48    
-560   48     
272    448    
208    -256   
-144   48     
-128   96     
160    -64    
-128   128    
0      32     
-32    176    
-64    320    
144    -96    
-160   128    
128    -16    
-192   0      
80     64     
-144   48     
32     112    
-112   64     
16     80     
-112   80     
208    256    
144    0      
128    -112   
-160   176    
80     848    
-16    80     
112    48     
-336   528    
144    112    
176    336    
-112   576    
144    368    
-16    -224   
-272   -176   
192    -112   
-16    -48    
144    -144   
-496   656    
336    240    
-304   80     
-96    -16    
176    -144   
96     -48    
-16    -16    
-368   1024   
1248   -544   
-1504  224    
272    0      
144    -16    
-48    64     
224    -560   
-80    -304   
32     224    
-48    208    
384    -80    
256    -256   
-416   160    
16     176    
80     48     
112    -32    
-368   -624   
192    -160   
384    880    
128    -160   
80     128    
-208   -160   
96     608    
-112   192    
224    176    
48     -240   
-272   320    
416    0      
-224   944    
-192   544    
64     1008   
1648   144    
-736   -560   
352    -528   
-32    576    
400    144    
544    832    
-224   1344   
-448   544    
464    352    
192    160    
-80    80     
0      400    
-96    272    
192    272    
176    -48    
-112   80     
32     -656   
16     432    
224    240    
-208   -192   
1088   -96    
-1456  0      
976    -480   
432    -368   
-176   752    
-144   1024   
-96    496    
672    -96    
-272   -128   
16     64     
0      -64    
128    80     
-32    160    
-128   80     
432    64     
-192   192    
176    352    
-320   272    
80     64     
48     16     
208    32     
-144   -64    
448    144    
112    48     
112    -192   
-160   192    
256    -176   
160    48     
16     416    
192    256    
-480   208    
720    80     
-320   160    
-176   80     
224    -432   
-208   -384   
528    -448   
112    304    
-432   -80    
-128   64     
496    128    
-288   -160   
160    496    
-432   -432   
464    336    
-16    -1936  
-128   208    
352    -32    
256    784    
-1440  -400   
1472   -832   
-288   -128   
-720   -192   
-144   288    
0      0      
624    -80    
-432   0      
-224   32     
-128   -448   
224    224    
256    64     
-48    144    
-160   64     
-192   80     
304    0      
-112   128    
112    -16    
-336   96     
1040   240    
-1280  -416   
944    288    
-96    -64    
128    48     
-288   -64    
128    256    
496    -496   
64     336    
-192   -864   
-160   -112   
-48    -32    
128    64     
112    112    
-16    64     
-80    160    
128    -128   
-80    48     
-144   -288   
0      320    
32     176    
-432   272    
272    -320   
368    112    
-384   96     
16     272    
-176   96     
240    80     
224    -192   
-256   -720   
-80    192    
-48    -368   
176    0      
-208   -272   
48     144    
688    -160   
-752   288    
752    -384   
-720   336    
-112   544    
880    240    
16     144    
32     -576   
-448   -16    
224    -352   
192    240    
16     256    
192    176    
-160   -176   
-80    -112   
176    -96    
128    320    
96     -192   
-240   -64    
16     64     
144    -656   
-32    -16    
96     -576   
128    -112   
-448   32     
192    -112   
48     64     
112    -560   
928    -160   
-2544  928    
1424   -224   
144    176    
16     96     
96     -256   
-496   176    
160    -1072  
144    64     
272    -112   
-256   -160   
-400   112    
432    -32    
-272   -96    
320    -240   
-384   160    
416    -976   
0      -112   
-336   -112   
240    -32    
-496   -624   
880    192    
784    32     
-1536  288    
1456   -48    
-1088  48     
-64    -336   
704    -96    
-304   -224   
-288   -256   
112    -16    
256    -416   
320    32     
-144   -1328  
-368   -128   
-144   -224   
720    0      
-192   -192   
-400   48     
528    -160   
-704   -80    
624    -48    
-176   32     
-192   -96    
16     48     
384    80     
-288   -208   
304    -288   
-192   -496   
48     112    
960    720    
-912   912    
-448   208    
704    -128   
96     -48    
-352   -240   
240    0      
64     192    
-736   -192   
192    -240   
160    16     
-272   -400   
-16    80     
-80    -144   
64     224    
128    -2256  
-112   96     
80     -128   
176    -16    
-96    32     
144    208    
0      160    
-560   48     
1264   -576   
-480   480    
-1536  144    
96     -240   
96     208    
-96    -224   
32     -240   
-208   -1280  
0      96     
128    32     
128    16     
-32    64     
-128   192    
-304   -48    
256    -80    
-192   -16    
416    -128   
-272   48     
-176   0      
176    -64    
624    -544   
-640   400    
528    -624   
80     144    
-400   304    
112    -144   
160    -96    
160    -112   
-128   16     
-144   32     
112    128    
16     16     
-64    -48    
-96    -448   
384    112    
16     -128   
-224   128    
592    -480   
-464   80     
-432   -32    
16     0      
-80    -64    
-16    -16    
-192   -160   
448    -32    
-32    48     
32     -208   
-400   -512   
-64    -192   
208    2208   
1472   304    
-1344  -304   
-2080  -640   
1344   224    
64     -272   
160    272    
-80    -256   
-528   -336   
224    384    
16     -16    
272    -16    
-528   -176   
208    -16    
-400   -336   
128    -16    
-64    -512   
-416   -96    
288    -240   
-336   -416   
112    -288   
-432   48     
-592   96     
-400   -352   
-160   640    
16     832    
112    592    
-160   -160   
272    112    
208    -96    
-352   240    
-48    -448   
288    128    
-144   192    
112    496    
-240   288    
96     48     
48     752    
208    176    
-80    -128   
-240   128    
192    -32    
80     -192   
192    768    
-144   480    
-192   -48    
224    -144   
16     144    
64     304    
-128   48     
-112   640    
544    448    
-784   464    
16     -256   
304    -128   
80     -288   
-160   -128   
-80    464    
208    832    
-272   -128   
240    -160   
-48    -144   
-80    -496   
-336   160    
288    0      
-112   16     
-48    288    
-16    384    
-160   -208   
-64    -112   
-64    64     
64     176    
-368   -80    
-144   112    
128    0      
80     144    
-32    112    
-192   -48    
128    128    
256    48     
112    -16    
-320   -128   
288    -112   
-128   448    
304    -256   
-768   -240   
112    48     
-256   160    
304    -256   
-32    16     
-176   0      
-176   32     
256    112    
192    352    
-96    192    
144    80     
-384   -288   
336    -464   
32     -144   
-16    -592   
0      144    
-208   -256   
960    -48    
-272   224    
-368   272    
80     400    
-240   -32    
16     -96    
64     -64    
256    1232   
-464   640    
-224   -64    
496    -112   
256    -784   
-352   80     
-208   496    
-16    -208   
-32    208    
400    48     
-1616  704    
-352   -352   
-224   560    
752    -672   
-128   256    
-512   96     
-128   -64    
256    416    
128    208    
-160   80     
-96    -16    
-336   -368   
96     352    
-656   1728   
2496   -288   
-992   464    
192    -752   
-720   -192   
352    -144   
-752   96     
848    -560   
-352   -464   
-512   -48    
384    144    
48     96     
80     32     
-144   240    
272    160    
-320   16     
112    0      
16     64     
0      80     
-128   80     
-128   -48    
640    1024   
704    224    
-848   -240   
480    -368   
-400   0      
-352   -80    
656    -16    
-288   0      
-144   112    
-112   64     
176    32     
48     0      
-48    48     
-560   160    
48     16     
240    80     
64     192    
-560   112    
64     176    
-64    -32    
-160   -240   
400    384    
112    -48    
-32    -48    
-128   208    
224    224    
64     -16    
48     16     
496    144    
-192   256    
-112   160    
-48    256    
-96    -128   
-176   64     
288    224    
-32    112    
96     304    
16     48     
272    448    
-80    208    
-592   64     
-48    160    
368    96     
112    80     
-304   -112   
400    416    
304    -48    
-592   48     
336    176    
-1040  608    
-240   -928   
64     1120   
-704   -336   
656    -512   
368    160    
144    -16    
-576   448    
-80    192    
304    288    
448    64     
-48    256    
-112   144    
-512   240    
480    32     
32     160    
352    -80    
-384   192    
-208   -144   
-192   -496   
416    336    
560    -80    
-1216  48     
688    80     
-496   16     
144    -64    
-176   0      
336    208    
-832   -32    
240    48     
336    0      
-448   -96    
80     144    
-208   128    
400    192    
-320   240    
464    160    
-576   240    
48     -144   
176    128    
-288   144    
176    16     
-128   96     
192    96     
-112   224    
336    224    
-48    128    
-32    64     
176    -48    
64     -288   
-224   48     
368    -1248  
-32    112    
-144   -544   
-656   0      
240    144    
-96    400    
-16    80     
16     -32    
112    128    
192    160    
-80    96     
240    160    
-96    -32    
112    -352   
352    288    
-192   -496   
-144   -192   
464    320    
208    304    
-32    -592   
-512   32     
112    368    
272    64     
304    0      
-224   160    
-240   32     
-64    -160   
640    0      
128    240    
-288   -48    
16     -144   
208    304    
-288   768    
1712   32     
-1840  48     
624    64     
336    112    
112    144    
176    176    
-912   448    
368    -160   
-80    96     
416    -16    
-528   -144   
32     208    
1072   -416   
-1088  224    
624    -560   
-368   -16    
272    368    
512    288    
-304   -128   
464    1248   
-224   -384   
-1408  128    
2752   -160   
-656   -96    
-272   128    
-240   96     
320    64     
272    -336   
-176   96     
-112   64     
-112   320    
288    48     
208    0      
-112   32     
-32    96     
-208   160    
336    192    
208    32     
-352   -48    
288    64     
-48    -416   
240    80     
0      48     
128    64     
-272   -384   
256    160    
96     80     
112    96     
-192   -160   
1312   1616   
-1008  208    
-1904  -736   
2464   -112   
-992   -656   
-1232  784    
1632   176    
-80    640    
-432   -192   
-80    128    
336    -480   
16     -16    
48     -112   
-112   32     
0      -80    
112    -2352  
32     -80    
80     -64    
-80    -720   
-48    -64    
208    160    
-208   -208   
720    528    
96     -32    
-448   -624   
640    -448   
-176   -448   
-64    448    
880    -576   
-272   -240   
112    -912   
32     -128   
96     -48    
144    -144   
144    80     
-96    -240   
-144   -16    
272    -608   
-144   -160   
-160   -656   
-16    -48    
240    -496   
160    112    
240    288    
-176   -320   
128    384    
-176   -80    
-1312  -832   
288    128    
-64    -16    
-496   -656   
272    -48    
112    -688   
-176   0      
-96    -112   
32     272    
400    176    
-528   -80    
-80    -64    
176    176    
80     -176   
-256   112    
-928   -48    
-16    -16    
464    160    
-160   -32    
32     -208   
-400   -256   
64     -48    
176    -1120  
-128   64     
80     -176   
-704   -976   
-1088  -352   
48     176    
-192   -1008  
736    -448   
-624   -320   
-544   560    
224    752    
-48    0      
256    -144   
-16    32     
112    -96    
160    -944   
160    80     
64     -32    
160    464    
-112   96     
160    -240   
-16    176    
32     -272   
-208   -368   
-48    -416   
-528   320    
160    -16    
-192   128    
128    -576   
-144   -848   
128    -96    
48     1168   
96     240    
64     112    
-32    -208   
112    -176   
-320   96     
304    -288   
-128   -240   
-288   192    
96     -288   
128    -272   
-1024  -352   
-272   -288   
144    80     
288    496    
128    192    
-80    -1600  
-272   64     
288    16     
160    -592   
80     112    
32     432    
-560   -96    
320    160    
320    -400   
-384   0      
352    -64    
-64    -240   
80     144    
48     -912   
-256   192    
192    -624   
-48    160    
-16    -32    
192    176    
-384   48     
-160   -416   
-192   160    
192    -400   
48     176    
208    880    
-64    -96    
224    -928   
0      400    
80     -288   
-240   16     
208    -336   
64     176    
80     160    
-336   -128   
288    -256   
176    336    
160    -208   
-464   -80    
400    544    
-48    128    
-112   -256   
-384   -496   
176    -304   
176    -336   
512    -112   
320    688    
-448   -800   
-352   16     
208    48     
96     -240   
-144   272    
-80    160    
16     48     
448    -96    
-32    -320   
-160   288    
-272   -176   
-64    192    
-928   240    
2272   288    
-1856  -192   
784    -752   
-80    736    
-240   480    
-576   272    
-640   208    
-208   -512   
240    -48    
-48    -32    
-240   -64    
-192   32     
368    -80    
320    -16    
-496   -336   
112    -80    
-208   0      
-80    -144   
-496   128    
656    144    
-224   192    
-240   -32    
96     240    
-208   -32    
48     224    
224    -48    
-256   128    
-144   -416   
784    -64    
-1488  -912   
32     -208   
432    -336   
-960   48     
880    320    
-224   560    
-208   176    
-32    -192   
-16    144    
-496   -176   
160    208    
-48    -128   
160    176    
-256   -176   
336    208    
-96    48     
-208   48     
160    160    
64     64     
-48    -16    
-48    48     
-400   -848   
-304   144    
288    -112   
-512   -192   
592    144    
-1104  -144   
-32    160    
-80    224    
-352   256    
144    -96    
64     80     
-176   80     
-80    48     
128    -16    
-128   208    
720    -96    
-512   176    
224    112    
224    -96    
-16    48     
-592   80     
-304   -48    
-176   -192   
48     -64    
-96    -208   
-288   -80    
32     -128   
352    -64    
496    -16    
-368   144    
-480   64     
176    96     
368    80     
-288   32     
-64    192    
-464   128    
-80    32     
240    48     
176    0      
-720   32     
-240   32     
224    -160   
208    -16    
-80    272    
-512   -96    
-208   64     
736    -80    
-560   160    
80     -96    
352    608    
-2128  -1632  
-64    368    
560    48     
-64    112    
336    192    
-768   176    
176    96     
240    160    
96     64     
304    32     
48     192    
-192   0      
-320   224    
112    -96    
-48    64     
64     64     
-240   160    
208    96     
-192   32     
-176   512    
832    304    
-1088  224    
144    -64    
720    32     
-176   128    
-400   -96    
352    64     
-496   -128   
288    -256   
176    16     
-320   64     
48     112    
-304   160    
640    48     
-128   64     
0      -16    
32     48     
-176   112    
0      272    
176    64     
160    256    
-224   -48    
-80    112    
-112   -32    
192    -32    
-64    -16    
-128   160    
224    112    
112    112    
-576   160    
464    48     
96     144    
544    720    
-912   176    
352    32     
-128   528    
48     -64    
16     64     
-144   96     
512    368    
-112   192    
320    112    
-304   176    
-48    64     
320    -16    
-256   48     
160    144    
-272   0      
112    0      
-192   80     
64     -112   
-64    32     
-208   320    
208    80     
160    16     
-112   48     
-224   48     
112    -96    
224    240    
0      240    
-96    48     
-208   144    
640    1920   
1376   -272   
-2160  128    
720    16     
-320   320    
480    -32    
-560   -336   
416    -768   
-512   320    
304    64     
240    -96    
-16    256    
16     96     
608    192    
-848   96     
416    16     
-48    352    
-160   64     
128    0      
144    -32    
-432   -64    
1440   -304   
-1776  -384   
1696   128    
672    -528   
-1216  160    
176    224    
64     0      
288    176    
32     -128   
-96    64     
-208   -320   
176    96     
160    16     
-304   272    
192    320    
-64    176    
256    -368   
16     32     
-208   16     
176    128    
176    112    
0      80     
-96    64     
80     80     
0      0      
-112   0      
-112   240    
128    128    
176    32     
240    2880   
144    -176   
-1392  -192   
1776   -288   
-1104  -304   
-496   256    
576    0      
352    208    
-208   16     
-160   80     
272    -64    
-16    112    
-16    -32    
-160   16     
224    -240   
-160   -176   
240    176    
176    -160   
-192   112    
16     -592   
240    144    
-64    -32    
880    -144   
-1648  112    
1568   -288   
320    128    
-736   464    
-304   -496   
512    -736   
16     -368   
-592   -320   
192    224    
-128   -16    
64     -16    
224    -560   
64     112    
-176   112    
192    64     
32     -16    
432    432    
-304   144    
16     224    
144    -160   
-32    160    
32     -304   
-160   -160   
800    816    
-656   320    
192    -176   
-80    -816   
32     -16    
-224   -1120  
448    -16    
-256   -160   
240    256    
176    -96    
128    208    
-32    160    
272    -304   
-704   160    
0      -144   
16     -224   
0      176    
176    64     
-480   -752   
208    96     
-96    -144   
384    -96    
-240   -48    
-240   0      
-128   -160   
272    144    
-608   912    
272    192    
-1104  192    
80     -1216  
1040   -16    
-80    -336   
-320   992    
-224   -928   
432    416    
336    -80    
112    592    
-352   -240   
-144   32     
240    400    
304    -288   
-416   -32    
112    80     
240    304    
-32    -416   
48     -80    
-128   -144   
-96    -32    
272    -192   
416    -96    
-544   -240   
-80    -384   
176    -496   
224    -160   
80     -272   
-96    -960   
0      -224   
192    -528   
160    0      
80     192    
-128   320    
80     352    
0      64     
-160   -400   
544    -992   
48     192    
-192   -208   
-144   -240   
304    -48    
80     48     
-32    -608   
-128   -800   
-96    -256   
208    -528   
-128   272    
96     -1040  
-176   64     
864    256    
-736   -400   
-304   -16    
880    688    
-464   496    
128    192    
256    -80    
-288   272    
-32    32     
16     -272   
224    -368   
-112   32     
-144   272    
96     -208   
-64    -32    
288    -944   
240    304    
-192   96     
0      96     
80     -128   
224    0      
-160   -272   
-144   -448   
192    -32    
32     416    
32     336    
-112   -448   
96     -32    
-16    -368   
-48    48     
304    896    
-688   -496   
448    -2240  
176    0      
-176   -528   
-560   -224   
272    -112   
272    48     
-160   16     
80     -512   
-608   -416   
64     -160   
144    -160   
0      -224   
288    -208   
-16    32     
112    336    
-432   -336   
192    112    
80     -112   
-96    0      
1104   480    
-1696  592    
624    -48    
-432   -80    
144    -608   
144    -976   
-880   -96    
896    -384   
-320   -224   
304    -208   
-160   -64    
-208   80     
0      224    
192    -272   
-144   48     
-112   96     
48     -96    
304    16     
-320   -16    
-128   -48    
400    64     
-432   48     
32     -144   
-160   -16    
-592   -272   
416    128    
-96    -416   
160    80     
-160   -448   
400    416    
-1232  1712   
1488   16     
-688   240    
-224   -400   
-240   64     
464    -496   
-608   48     
176    -560   
-96    208    
-32    -272   
-96    192    
144    -448   
192    176    
-240   -992   
352    96     
-320   16     
-144   -32    
176    0      
208    -48    
-304   -112   
-16    32     
224    816    
-240   -304   
-64    112    
304    0      
-64    128    
-304   -288   
128    16     
128    -160   
-96    -16    
64     0      
-240   0      
-304   -48    
64     16     
112    -64    
128    16     
-80    128    
64     -48    
64     64     
224    -608   
128    96     
-464   -176   
-112   480    
-336   -64    
432    32     
544    304    
-928   416    
-96    288    
688    368    
80     112    
0      64     
-496   -256   
-880   -224   
496    -144   
-480   -336   
-48    0      
-320   48     
64     -16    
64     -64    
336    240    
-448   -80    
-624   128    
256    128    
-208   112    
-32    -64    
128    0      
112    96     
-688   -288   
208    48     
256    -80    
-272   80     
1296   3712   
-896   656    
368    -80    
544    -304   
-784   -112   
240    336    
-80    -112   
-352   -176   
-176   -48    
128    -176   
192    272    
0      32     
96     112    
32     -80    
-336   128    
160    -48    
-208   -80    
-64    48     
-192   0      
1104   624    
-1376  -288   
736    256    
-112   32     
-480   -224   
-848   -32    
-192   96     
-96    48     
32     -112   
80     -400   
-96    -16    
-48    16     
-304   32     
304    32     
-208   64     
400    128    
-448   96     
160    240    
-384   144    
544    -192   
-368   -208   
-32    -32    
80     -176   
224    80     
-96    -80    
-144   144    
-112   128    
208    80     
-224   32     
-64    -96    
176    -32    
-304   48     
208    128    
-560   -288   
480    -240   
-464   48     
672    352    
-784   256    
-592   208    
64     80     
384    -80    
-112   -208   
-528   0      
-64    32     
0      32     
80     48     
-16    128    
16     224    
-336   -128   
144    -128   
-112   -64    
80     -240   
-272   -416   
240    -288   
-144   64     
-176   -64    
96     16     
0      -96    
-192   -176   
-144   240    
192    176    
96     128    
-16    64     
-528   -1120  
1056   -1456  
-304   736    
784    -192   
-848   -48    
80     176    
80     48     
256    32     
-288   544    
32     -160   
64     -144   
-96    160    
272    144    
-128   160    
-96    -336   
64     -48    
-208   96     
-80    288    
800    208    
-528   -288   
-112   -112   
-80    -656   
-416   352    
1184   -384   
-1456  -144   
608    224    
-352   -208   
-48    0      
256    160    
-352   272    
-192   64     
112    352    
-320   496    
-96    -80    
112    -240   
-16    -144   
-144   240    
336    64     
-320   128    
240    -32    
48     16     
-96    192    
0      192    
96     -64    
144    160    
16     -112   
-16    240    
-144   96     
-80    -112   
176    -16    
240    496    
1024   -448   
-2720  704    
768    192    
768    -432   
-736   0      
224    320    
-384   16     
-112   224    
384    592    
0      80     
48     -64    
-272   -16    
240    160    
256    80     
-368   -48    
96     80     
-32    -48    
144    -176   
-336   -576   
144    -112   
-96    320    
368    -80    
-2000  160    
1232   -208   
240    -48    
-336   528    
224    480    
16     528    
-144   384    
-112   592    
688    -96    
-272   -512   
-432   -352   
128    -144   
64     96     
-288   80     
-64    224    
-48    -32    
128    80     
-16    -16    
16     48     
-336   128    
224    208    
208    32     
-272   192    
-496   208    
1104   -144   
-192   208    
-1120  432    
512    416    
-176   -48    
416    0      
224    -48    
-656   -144   
352    16     
64     144    
-480   208    
496    -304   
-816   336    
336    256    
-240   256    
-256   -144   
192    176    
208    -112   
-384   496    
32     -112   
-320   240    
528    -400   
0      288    
0      -528   
-176   80     
96     112    
-832   -400   
-48    -64    
-416   192    
-176   -288   
528    -736   
112    -464   
-272   384    
-304   304    
-32    16     
656    160    
48     -112   
-208   64     
-160   144    
-16    160    
128    -64    
-160   112    
48     96     
64     -48    
-128   -368   
-288   -656   
112    -80    
64     224    
-160   288    
1024   64     
-1248  1120   
816    304    
16     144    
-272   -160   
192    -496   
112    496    
-192   -896   
-64    -528   
304    -1104  
-80    48     
240    -32    
-464   -160   
448    144    
336    384    
-224   384    
0      320    
-112   -96    
48     -176   
384    -384   
-64    -512   
400    592    
-528   512    
176    272    
496    -416   
-144   -144   
-16    -112   
-368   -64    
336    448    
160    320    
128    -608   
-752   272    
336    -368   
320    -192   
-64    -480   
-192   -560   
-448   -464   
112    -592   
480    -144   
-96    -704   
-160   352    
-304   464    
544    176    
-48    -112   
64     -384   
-176   -176   
0      -352   
272    -576   
-288   -384   
-192   -32    
176    96     
-112   96     
288    -384   
-464   256    
16     -416   
0      -896   
48     -816   
144    32     
784    704    
-1472  1328   
1248   -208   
16     528    
240    128    
-128   -336   
-448   240    
448    -96    
-112   208    
-32    -288   
272    128    
-208   -224   
336    32     
160    -688   
-304   80     
192    0      
112    288    
80     16     
176    160    
-224   352    
160    -96    
976    -528   
-2336  16     
1632   336    
-384   -208   
-784   240    
1264   64     
-400   16     
-208   -416   
-544   192    
560    80     
288    0      
-96    160    
-384   -528   
160    144    
112    -176   
208    -688   
-368   -144   
304    16     
-112   -80    
224    48     
-48    -384   
240    128    
-592   -160   
352    -496   
80     112    
-80    -272   
-16    112    
-464   -32    
288    -160   
-592   -848   
1392   -1664  
-400   624    
544    -320   
496    -176   
-800   -272   
-80    48     
512    -112   
272    64     
16     32     
-288   16     
0      -496   
384    64     
0      -48    
-16    -272   
-624   -48    
480    16     
-48    16     
192    -272   
-16    -176   
-96    -1872  
128    112    
304    496    
-1232  -80    
400    304    
-384   160    
-288   32     
768    32     
-656   -64    
192    -256   
-448   -96    
32     -256   
-96    -256   
80     -336   
96     -32    
0      -128   
-112   -64    
32     160    
-176   -112   
272    -336   
-80    240    
-368   -112   
160    128    
-112   96     
320    -96    
-96    -64    
-288   -48    
80     400    
-272   -160   
32     208    
-112   16     
352    176    
304    -1488  
48     0      
48     16     
80     160    
272    32     
48     64     
384    -208   
64     0      
176    -112   
176    144    
-288   80     
80     -128   
480    112    
112    -496   
-224   32     
320    -704   
-32    64     
256    128    
-192   48     
240    736    
-720   -1424  
-1024  352    
1616   -272   
-1008  -384   
800    288    
-704   112    
-320   -32    
-48    -48    
-208   -480   
432    128    
-48    -112   
-480   16     
624    -928   
-64    0      
-128   -48    
16     -48    
64     80     
-80    -16    
-304   -32    
96     384    
-32    160    
-528   0      
320    64     
-192   80     
128    96     
224    -96    
-112   -32    
-224   -64    
736    48     
-608   80     
112    112    
48     224    
96     112    
-288   32     
288    80     
224    128    
-304   240    
80     80     
0      16     
208    400    
144    -32    
-192   112    
-448   48     
128    48     
96     112    
64     -288   
-64    -528   
-64    -304   
-368   -96    
144    -176   
-240   -64    
64     -80    
-304   144    
560    -592   
-336   -224   
-1360  -608   
16     -464   
80     -688   
560    -208   
-736   -208   
-240   -208   
0      -128   
240    -112   
16     16     
112    528    
-560   416    
-144   -368   
512    208    
-304   176    
-400   -256   
-16    -64    
208    336    
16     -80    
-352   -112   
-112   0      
-208   16     
192    368    
-352   -32    
32     656    
-224   32     
48     -256   
-160   -32    
-800   -320   
976    -384   
-752   864    
-464   496    
384    96     
64     -1136  
-224   48     
0      32     
480    -80    
208    -96    
-480   -80    
-272   96     
0      -48    
544    -320   
-208   -320   
48     320    
-528   -80    
656    208    
-160   -256   
-160   16     
320    688    
-336   -352   
-1088  288    
1376   752    
-528   -480   
-592   224    
176    368    
-432   -608   
160    -112   
64     -96    
-16    512    
32     -80    
-48    -224   
80     -192   
288    -368   
-176   -16    
-272   800    
512    64     
64     -640   
-208   368    
-544   320    
368    -176   
176    -144   
-112   112    
-688   128    
64     480    
400    -128   
-96    -272   
-224   -112   
64     32     
-48    -256   
1056   -768   
-1616  320    
1136   240    
-320   288    
-208   208    
32     848    
-128   560    
352    -960   
-1360  128    
-16    -560   
-464   224    
224    -16    
176    320    
-48    -32    
-384   32     
128    -256   
112    -32    
128    -320   
-288   768    
128    400    
-192   -176   
1008   -144   
-1984  256    
1072   288    
-112   976    
-592   400    
96     -448   
704    -1504  
-112   -1184  
-432   -752   
48     -288   
256    -288   
-128   -224   
368    -192   
-224   144    
112    192    
-112   16     
-144   224    
-128   -272   
176    -96    
-80    -80    
96     64     
112    48     
-336   64     
384    -208   
224    -400   
464    -368   
208    80     
-496   848    
240    48     
-64    -112   
-352   128    
96     128    
0      96     
-288   160    
368    64     
528    16     
272    1568   
-592   784    
240    112    
720    -112   
-192   160    
-96    -80    
-176   -160   
-256   -64    
384    400    
-512   80     
304    16     
-192   192    
-256   288    
-32    48     
-336   -624   
-736   80     
-160   -320   
-48    -176   
1216   112    
-1088  -480   
400    -448   
64     464    
224    384    
-112   0      
-208   160    
128    -144   
272    64     
-192   -80    
112    112    
-224   -64    
16     144    
160    -80    
-432   -576   
96     96     
32     560    
0      32     
192    224    
-656   -224   
464    160    
-128   336    
160    112    
176    128    
-208   -32    
-64    -144   
352    -288   
0      480    
-32    320    
-272   192    
160    -16    
112    16     
512    -96    
-512   -48    
-48    32     
80     96     
144    112    
192    96     
-240   160    
-96    256    
-144   304    
96     0      
0      -800   
-816   -784   
-80    -928   
-176   -624   
96     -208   
-304   96     
-336   736    
672    16     
-256   -240   
-64    32     
64     -96    
-240   -352   
-112   -320   
240    -64    
64     112    
-64    160    
-112   48     
192    -16    
240    -16    
64     208    
-64    64     
-160   32     
80     32     
208    384    
-208   48     
144    -784   
96     128    
-32    256    
112    80     
0      16     
-240   -720   
-64    -336   
64     432    
-160   16     
256    224    
160    208    
-304   1664   
1888   -384   
-1728  -160   
512    -48    
112    -224   
320    -32    
-416   128    
48     224    
-128   -80    
16     128    
208    -64    
64     96     
-224   208    
-64    288    
576    -192   
-624   16     
48     0      
160    -96    
-432   32     
544    -384   
-448   -464   
1936   -320   
-1648  368    
720    160    
-208   -64    
-512   96     
-80    272    
288    240    
368    -96    
-464   -16    
0      80     
-208   224    
464    -128   
-80    112    
208    -1088  
-448   176    
432    -2592  
-80    176    
192    128    
80     0      
-272   80     
336    112    
-16    48     
-16    80     
96     80     
-464   0      
576    272    
-192   -144   
-48    80     
112    -176   
1424   1200   
-1888  704    
-288   608    
1952   144    
-1152  -368   
-304   0      
496    -48    
-480   -128   
256    -48    
112    0      
-176   -144   
-160   208    
48     -192   
224    80     
-320   -32    
240    208    
-128   -160   
-160   96     
176    -128   
80     64     
-272   0      
144    240    
-64    -368   
-976   400    
864    -16    
-560   -192   
-352   144    
416    -64    
128    448    
-464   32     
-80    -64    
320    -544   
112    96     
-160   0      
-112   144    
416    32     
-352   160    
192    -32    
-80    80     
32     96     
64     -240   
-288   224    
64     -416   
-16    -80    
-928   -320   
480    16     
-96    -64    
160    240    
144    80     
-576   -432   
-368   -144   
400    208    
-64    16     
96     48     
-112   48     
336    0      
96     -16    
64     -176   
240    -64    
-304   -272   
64     16     
-464   112    
128    16     
32     -80    
256    432    
-16    -16    
-176   -2304  
-16    -96    
16     -112   
64     -80    
-192   -80    
320    -1120  
1072   896    
-2336  272    
2064   -48    
336    -128   
-512   -48    
64     -1584  
-464   0      
448    -1472  
304    32     
-352   -256   
224    112    
-1200  -160   
400    -512   
368    -160   
-224   -592   
112    176    
-400   -192   
304    80     
64     288    
-304   -416   
144    256    
-192   400    
192    -48    
-544   128    
768    -240   
-320   -96    
-640   -112   
336    -192   
-352   -224   
80     -160   
352    -272   
-464   -320   
224    -336   
80     -1616  
304    16     
-80    16     
-128   208    
640    144    
48     720    
-64    240    
176    448    
0      64     
-272   -320   
-736   -16    
176    -128   
-176   -240   
-288   -448   
-176   80     
432    -256   
-144   -384   
-32    -128   
160    0      
384    288    
-1056  608    
352    720    
-16    608    
-64    368    
448    224    
-304   1216   
-32    816    
208    -784   
-80    16     
32     -144   
-64    -304   
240    320    
64     -576   
-272   -48    
80     224    
48     160    
144    32     
80     224    
-240   80     
112    -496   
128    -128   
-144   -32    
-336   -256   
-176   64     
288    32     
16     -320   
224    -320   
-144   -1184  
-64    80     
80     112    
-96    1056   
320    -80    
-304   -160   
-384   208    
384    0      
96     -336   
-32    -48    
-448   -144   
-80    0      
480    48     
160    -176   
-16    80     
-176   -80    
80     176    
160    -560   
-288   224    
144    48     
-160   160    
352    288    
-368   80     
-976   192    
1872   16     
-1472  -16    
128    -432   
704    128    
-416   -176   
-240   880    
416    -64    
-432   208    
-64    -48    
-16    -176   
-80    208    
32     -80    
16     -64    
-144   96     
-160   592    
288    -192   
-16    208    
144    800    
32     400    
16     -224   
-256   -384   
160    -416   
400    80     
-128   624    
-160   368    
-48    16     
224    0      
256    -64    
-624   -96    
576    -848   
-2752  -688   
576    992    
336    -416   
48     208    
-944   240    
-208   160    
-352   -336   
-480   496    
192    -400   
-512   160    
-144   -176   
-416   -16    
208    64     
-128   240    
-80    80     
224    -64    
-400   -272   
224    -816   
144    192    
-288   -144   
-624   -736   
512    -352   
592    -208   
-1312  240    
416    272    
-384   192    
-64    528    
-1280  1024   
528    752    
48     672    
-32    384    
208    -16    
-192   -64    
-384   256    
352    -288   
32     64     
-160   -128   
464    -192   
-240   16     
96     -320   
-368   -128   
-208   160    
64     304    
-336   16     
480    -368   
-304   80     
352    -96    
-272   -160   
672    -144   
-320   -16    
208    80     
32     160    
-32    16     
-112   64     
-32    144    
-288   80     
-32    64     
16     272    
-784   -160   
304    96     
-848   -176   
96     64     
-64    16     
-496   -96    
304    -208   
-112   16     
-384   80     
-144   64     
-16    96     
432    544    
-272   -880   
704    -1568  
288    272    
288    -48    
-1296  -160   
-304   160    
480    -224   
192    368    
32     -96    
-880   -48    
752    112    
-320   240    
336    -96    
144    288    
-576   -32    
208    144    
304    112    
-96    64     
-144   112    
-176   -560   
-400   208    
496    448    
-800   288    
384    0      
560    112    
-864   16     
320    32     
-320   16     
320    240    
-496   48     
384    -64    
-432   -128   
160    -16    
240    -16    
-80    176    
240    -96    
-400   112    
-192   -208   
-144   -80    
384    48     
16     64     
-240   64     
-256   -32    
320    96     
32     192    
288    448    
-416   224    
64     48     
-80    -32    
-16    400    
-304   112    
384    224    
-160   -288   
352    -352   
-80    320    
208    -256   
-384   -160   
-192   -96    
-48    64     
208    48     
96     80     
128    0      
-368   32     
-16    -80    
192    112    
-16    64     
112    128    
-160   -64    
-144   -128   
80     80     
-144   160    
304    -32    
-304   -96    
-80    80     
-80    208    
112    48     
-64    -16    
-64    -32    
48     -128   
-144   352    
96     32     
32     -16    
1088   960    
-2608  176    
880    -64    
800    -160   
-400   -224   
-176   16     
16     32     
176    128    
-80    128    
160    -80    
-528   240    
304    -32    
224    192    
-304   -128   
-160   224    
704    208    
-448   -96    
48     144    
-16    144    
-16    0      
32     112    
-1264  1024   
2080   -336   
-1232  -336   
-784   -160   
864    144    
112    0      
-32    144    
-400   0      
224    -144   
-480   208    
496    80     
-192   272    
-64    16     
-112   16     
192    32     
256    144    
-624   96     
528    -32    
-560   -32    
432    48     
-112   64     
128    96     
-192   32     
160    80     
-208   -16    
-16    48     
48     0      
-80    32     
80     112    
-640   -864   
2400   1632   
-336   -416   
-816   624    
176    -336   
-512   304    
272    0      
96     704    
544    592    
-464   192    
-352   96     
336    16     
224    48     
176    160    
32     304    
-400   128    
48     208    
256    -64    
-272   64     
-16    -112   
0      80     
-176   48     
608    640    
-1168  -160   
112    48     
112    176    
-320   16     
272    224    
-160   80     
192    320    
-336   16     
80     80     
128    96     
-208   128    
-80    96     
272    144    
48     -144   
-320   -528   
192    64     
64     -1456  
-144   224    
80     16     
-128   80     
240    416    
-864   -16    
176    112    
784    96     
-624   48     
400    -144   
0      16     
-272   0      
576    -48    
-48    -112   
-240   80     
0      -320   
192    0      
144    -160   
-352   96     
-224   32     
384    160    
96     64     
48     192    
-96    -320   
112    400    
-288   48     
176    96     
-32    32     
288    256    
-128   80     
-112   -256   
0      128    
-592   -1168  
1120   -1920  
-1872  -816   
768    -16    
352    -256   
48     48     
-592   -176   
-64    400    
192    112    
384    -64    
384    48     
-576   -112   
-224   64     
192    -208   
704    16     
-464   -752   
-160   112    
48     -256   
304    176    
16     -112   
-32    592    
32     832    
32     432    
432    176    
-464   80     
208    432    
-80    -128   
304    -160   
240    -144   
-192   1184   
-64    -128   
0      -240   
80     -2816  
-80    368    
-352   -64    
432    224    
144    352    
-16    176    
224    416    
-224   -336   
-64    -496   
432    -80    
16     176    
-176   80     
-64    144    
-64    192    
576    -192   
-32    -32    
-176   96     
-96    -416   
-16    -32    
112    112    
-128   128    
-544   -624   
688    -752   
-144   -496   
-432   -560   
464    480    
-16    16     
48     -256   
-144   176    
-32    608    
128    -1200  
64     144    
-80    -240   
192    -256   
-400   -176   
288    384    
272    224    
0      -64    
-48    352    
112    -64    
-192   144    
192    -224   
16     112    
64     -64    
-128   176    
-64    -208   
224    -2032  
384    -352   
16     -2544  
-64    224    
-192   32     
192    -1536  
-368   16     
-576   -1120  
176    -528   
416    -704   
400    48     
0      768    
-352   -144   
-288   -48    
-48    -224   
192    -256   
16     -16    
-240   -288   
416    -304   
-496   -80    
304    -192   
-128   96     
48     -560   
208    -64    
-192   -1632  
480    608    
-400   -64    
-368   -96    
1344   -672   
-864   -144   
160    -336   
496    368    
128    96     
-480   -128   
-416   -80    
208    -80    
128    128    
-96    -48    
-32    128    
112    -80    
-64    -272   
320    -672   
-176   208    
192    -736   
176    752    
-16    288    
-208   -288   
-64    -96    
448    -352   
-304   -320   
-240   64     
-128   192    
32     -144   
-160   0      
448    -352   
-576   -1264  
1632   -1472  
-1280  752    
416    112    
144    -320   
32     -352   
16     464    
576    -400   
-288   400    
-128   176    
-160   848    
240    -16    
32     -208   
128    -96    
-336   -288   
0      -80    
496    -368   
-48    336    
-48    -416   
-128   240    
224    -32    
-304   -544   
1136   64     
-960   128    
816    1104   
-368   448    
-464   256    
48     944    
-832   -112   
-176   -176   
-80    -128   
144    -80    
240    64     
0      -928   
-336   16     
224    -112   
192    32     
-224   160    
16     -176   
-208   -64    
32     0      
-224   -96    
144    48     
48     -432   
0      208    
48     -96    
-32    -304   
672    400    
-304   -1008  
-928   256    
-304   208    
272    0      
256    -96    
-32    -240   
352    80     
-304   -80    
16     0      
-208   176    
640    -48    
-64    -192   
96     -16    
112    -448   
-288   224    
112    -480   
192    240    
-544   48     
160    144    
-176   32     
192    32     
272    -32    
-304   48     
560    848    
-32    2976   
-624   128    
-1184  224    
368    -80    
224    -176   
144    48     
-48    -320   
-32    48     
-32    256    
-384   240    
528    64     
128    64     
-352   -32    
-96    80     
224    16     
-48    -112   
-16    -32    
0      -32    
-288   176    
688    -144   
-496   336    
160    -432   
-688   176    
-784   32     
64     96     
1024   112    
-848   96     
-32    112    
-32    64     
320    -80    
48     16     
-192   96     
-480   -32    
592    224    
-592   -128   
-352   -80    
320    -32    
-464   32     
400    176    
-928   0      
464    16     
176    -16    
-528   64     
80     192    
-224   208    
624    368    
48     160    
-352   -32    
272    112    
80     48     
-256   112    
128    96     
-400   -672   
-240   128    
160    -16    
-960   0      
720    64     
32     -96    
-272   112    
112    256    
-224   -336   
320    -64    
160    0      
-32    80     
-96    0      
64     16     
-48    64     
128    320    
-48    304    
-288   112    
224    -176   
-192   -128   
-336   240    
192    64     
240    -96    
-1456  -160   
-256   96     
208    96     
96     464    
-400   128    
96     -64    
80     -32    
-880   1024   
1808   -480   
-1808  320    
224    -112   
624    96     
272    48     
-1008  240    
192    288    
-272   -240   
-176   384    
672    0      
-432   96     
-368   224    
624    -176   
-16    32     
-32    64     
-640   16     
192    16     
352    32     
-96    -96    
-640   -192   
832    -288   
-1072  416    
1552   -208   
-320   -32    
-640   -80    
-288   -48    
720    -208   
80     144    
112    64     
-176   48     
-304   64     
96     0      
464    48     
-368   -48    
-128   -80    
96     64     
-160   32     
-80    0      
64     0      
-624   -32    
16     96     
-64    112    
208    32     
-128   160    
0      -48    
-80    224    
224    -48    
-192   112    
96     80     
-400   -480   
1088   -240   
-1552  160    
752    -32    
32     160    
0      -144   
-176   240    
208    320    
176    128    
-320   -16    
96     80     
-160   96     
80     80     
128    80     
16     -96    
-624   48     
336    48     
0      96     
96     64     
-128   32     
-256   208    
208    112    
-672   -448   
672    -288   
-352   -112   
-272   240    
-112   640    
-48    112    
400    -224   
-528   -64    
-112   32     
0      -128   
304    0      
288    -80    
-496   304    
304    336    
-336   -16    
32     96     
192    240    
-256   224    
240    -48    
64     16     
-144   32     
160    272    
-688   320    
0      -16    
-320   224    
448    -256   
608    -32    
-272   96     
448    96     
64     0      
-208   240    
336    112    
0      80     
16     -192   
16     -16    
592    -128   
-176   224    
-400   128    
320    32     
-96    224    
-560   96     
320    -144   
0      144    
16     -144   
-160   80     
-144   -240   
-272   144    
96     32     
-32    -48    
128    304    
800    2016   
-896   896    
496    384    
1200   144    
-704   96     
-560   128    
416    272    
800    -128   
48     -560   
-608   -480   
176    352    
-96    0      
288    304    
160    0      
-432   -96    
208    -112   
80     -208   
-240   -320   
80     96     
-112   96     
96     32     
112    96     
112    144    
-176   48     
-48    336    
448    -16    
-176   736    
128    -112   
-336   -272   
-16    -16    
96     432    
-64    464    
-112   -32    
-128   -320   
0      -224   
208    288    
144    720    
-560   -16    
240    -96    
304    -240   
-432   64     
-16    112    
-144   -288   
112    80     
96     224    
288    -272   
-224   464    
-64    0      
544    288    
-16    448    
80     -96    
64     -112   
-528   -3120  
464    -16    
-176   -224   
-80    560    
96     -416   
-272   -912   
432    128    
-256   1056   
-32    336    
-48    -32    
96     -64    
192    144    
-128   256    
64     -64    
64     64     
128    -272   
-16    -32    
-192   128    
-128   240    
-64    32     
-48    96     
160    16     
-128   160    
16     -48    
-64    32     
176    -240   
-32    -784   
-416   -336   
48     -48    
-112   416    
64     -480   
432    -112   
-128   464    
112    -112   
-208   256    
352    592    
-64    304    
112    -384   
160    -352   
16     1040   
-160   -144   
288    -432   
-64    352    
0      80     
240    256    
-144   -864   
16     272    
-80    -96    
80     -320   
-256   -128   
-208   96     
416    560    
544    -752   
-944   -464   
1104   -352   
-944   -16    
-96    -48    
400    576    
288    -624   
-720   224    
-208   16     
480    -144   
464    48     
-368   -96    
-336   -2064  
128    64     
512    -160   
-16    384    
-240   -272   
176    464    
400    256    
48     -96    
-144   -64    
-96    464    
48     304    
272    48     
208    256    
-224   -304   
128    48     
-128   -80    
176    -400   
-992   608    
1904   64     
-752   32     
-64    -64    
672    -80    
-352   -96    
448    288    
-240   160    
64     144    
-112   -96    
480    64     
-144   -400   
-272   48     
256    -144   
-160   0      
80     112    
64     32     
128    -80    
144    -304   
-96    48     
176    32     
48     608    
160    -640   
-368   192    
64     -208   
288    464    
-384   304    
-224   -80    
1024   -80    
-416   -96    
64     -64    
128    -352   
-288   176    
176    -160   
320    -64    
-288   -80    
-80    -1504  
96     -224   
208    48     
160    -336   
-608   288    
-192   -112   
-80    -608   
176    -16    
-144   -464   
144    -64    
-160   -448   
208    320    
-1280  304    
-784   224    
736    -256   
176    -320   
-32    80     
80     -1248  
128    80     
48     -448   
32     -448   
64     -192   
48     96     
368    128    
-112   352    
-384   0      
240    -32    
304    96     
-176   -448   
32     -32    
-80    -512   
576    -16    
-96    -304   
-176   64     
512    752    
1120   2864   
-1680  1392   
1344   -576   
256    -352   
-912   -96    
-192   176    
512    -32    
-256   -80    
144    -208   
160    128    
96     -48    
-256   112    
240    -528   
160    -80    
-288   -1760  
112    80     
-176   -160   
272    64     
112    -64    
-368   -128   
-32    272    
16     0      
-432   -144   
304    -32    
96     -176   
-48    -176   
-272   128    
368    -80    
32     128    
96     -160   
-176   128    
-144   -240   
560    208    
-224   -144   
160    -112   
-608   -16    
624    128    
-240   64     
208    80     
464    -128   
-448   -48    
-144   16     
-320   -48    
224    48     
288    -192   
-160   128    
64     -1376  
-704   -304   
352    -112   
256    -16    
288    224    
16     64     
-208   400    
432    -192   
-176   208    
528    80     
-1072  32     
48     -480   
176    -32    
-32    112    
-96    32     
80     -400   
256    80     
-256   240    
0      32     
-32    0      
224    -48    
0      208    
-304   64     
-64    32     
320    -32    
64     -144   
-416   -80    
112    256    
160    -416   
176    16     
-16    -112   
-240   48     
-352   -48    
272    -240   
16     96     
-48    16     
800    576    
-2560  224    
1584   0      
384    -112   
-816   16     
224    -288   
-80    224    
240    -128   
-32    -272   
176    256    
304    -144   
-160   -112   
-96    -48    
-208   -32    
-128   352    
560    -176   
-144   -240   
-240   224    
176    -224   
192    -16    
-160   32     
-880   1296   
1856   -256   
-1440  0      
-368   -224   
-112   -48    
-320   32     
784    -432   
-416   240    
144    -160   
-528   -96    
224    32     
32     -160   
-624   -32    
192    64     
-320   -16    
400    192    
-368   -128   
176    96     
-80    192    
48     0      
-192   160    
-112   0      
-144   -16    
-112   -48    
336    64     
-608   -224   
240    224    
-128   -48    
128    224    
-816   208    
704    1744   
1120   -240   
-1312  176    
576    -240   
160    112    
-64    304    
-16    208    
-144   -256   
-256   -288   
-64    16     
-160   32     
176    96     
-32    -112   
112    336    
-288   -32    
-128   192    
400    -160   
-128   112    
144    64     
-320   32     
128    112    
-496   64     
1440   -448   
-736   128    
496    -512   
144    -400   
368    80     
-1008  320    
-352   192    
32     -272   
320    304    
368    112    
-384   -16    
-384   64     
224    96     
496    176    
-240   32     
48     368    
-288   240    
16     -64    
48     -96    
-80    160    
-848   112    
-80    224    
80     -32    
368    624    
-288   128    
-400   -1232  
-176   224    
-48    624    
-768   -96    
416    32     
-64    64     
-160   -128   
-176   -272   
-224   16     
240    -112   
-864   496    
192    16     
-224   -256   
336    -16    
-112   -64    
64     176    
-256   352    
48     64     
160    32     
-352   -336   
48     -16    
-496   -16    
208    -16    
336    -320   
-320   -912   
832    -528   
864    304    
-1488  112    
288    208    
464    -368   
-400   -896   
176    512    
-448   224    
288    -288   
192    144    
48     320    
-128   128    
-144   128    
96     -64    
448    400    
-352   -96    
80     -192   
-240   -112   
48     -144   
-16    -96    
16     208    
320    368    
-448   112    
-48    240    
512    -624   
-272   -896   
-64    624    
-112   -608   
-528   -416   
352    304    
-208   368    
128    224    
-16    112    
16     592    
624    336    
-224   -80    
-144   48     
-176   -320   
352    -128   
-128   64     
-80    448    
-160   -304   
-144   -32    
32     -80    
112    -304   
-112   192    
-192   240    
240    -448   
80     0      
-64    80     
-80    160    
-64    -688   
96     -608   
-128   -144   
-576   -288   
368    -112   
160    240    
192    -80    
-464   80     
-32    -48    
176    -128   
144    192    
-48    -80    
-32    368    
64     384    
48     144    
0      160    
48     -288   
64     80     
16     416    
-160   32     
-80    -144   
-48    336    
208    80     
-336   272    
128    496    
-304   32     
16     688    
16     352    
-64    -528   
272    -240   
464    992    
-1184  896    
448    -128   
368    -48    
320    -64    
144    -192   
-640   -416   
128    208    
416    256    
48     48     
-160   -48    
-304   112    
336    144    
192    96     
-64    144    
-32    -64    
-304   64     
288    -48    
368    96     
-336   192    
-464   -336   
1168   -32    
-992   176    
112    -928   
528    240    
-144   -112   
16     176    
64     144    
-96    -64    
352    416    
-320   128    
64     144    
80     64     
-176   256    
-48    160    
-80    224    
0      -112   
576    -224   
-304   -64    
-96    -144   
192    -16    
96     80     
-112   48     
-16    96     
-80    176    
0      240    
208    240    
-112   48     
48     32     
0      144    
-336   -1216  
1152   -224   
-96    288    
-528   -544   
1168   384    
-208   -864   
-352   384    
848    416    
-208   512    
80     -96    
-32    112    
80     32     
144    80     
-240   -32    
112    240    
240    64     
-192   144    
112    80     
-80    -320   
144    0      
-240   -736   
176    208    
304    752    
16     -320   
-976   80     
1232   240    
-624   240    
96     112    
80     48     
-256   -208   
272    -224   
-160   -224   
-288   80     
112    -176   
64     144    
480    -48    
-256   96     
-288   16     
80     -176   
0      -224   
288    -48    
112    80     
-192   128    
-720   -384   
640    64     
-64    160    
0      -112   
0      528    
-288   48     
560    -144   
480    192    
240    144    
-112   -736   
-112   128    
464    144    
80     288    
-224   48     
-16    288    
-96    208    
224    -16    
528    288    
-176   240    
-368   160    
208    -176   
384    48     
16     -784   
-144   160    
-528   -128   
896    208    
128    -16    
128    144    
288    352    
1552   2304   
-1648  1376   
1248   -256   
608    -432   
-592   -224   
-576   320    
272    -560   
608    0      
32     160    
-960   0      
-96    240    
272    -240   
320    -32    
64     80     
-480   96     
-80    112    
192    224    
272    -176   
-320   80     
1088   592    
-1264  -32    
976    96     
-32    -144   
-192   -16    
544    80     
-784   -208   
688    432    
112    240    
-272   224    
192    -16    
-32    -800   
96     32     
-80    -176   
256    16     
-240   -64    
32     128    
144    -128   
-464   144    
592    -144   
-128   208    
160    80     
-160   -16    
-32    48     
-48    -464   
96     128    
-432   -736   
544    -480   
112    32     
-192   -432   
192    -80    
-80    -592   
192    -272   
-224   -928   
368    -336   
304    -16    
-464   -304   
320    -352   
-352   160    
-16    -528   
336    -96    
-576   -336   
-112   -32    
-256   -32    
160    -240   
-128   -144   
-32    -688   
144    -16    
80     -1456  
-240   96     
176    -272   
64     -352   
-240   -240   
16     96     
144    80     
0      -32    
16     16     
0      -160   
-432   -160   
240    -80    
-144   336    
304    208    
-96    16     
-352   -1264  
880    -1296  
-688   368    
1248   240    
-592   -576   
-384   304    
496    -144   
128    96     
-32    -32    
-464   16     
304    -96    
-224   -16    
80     -96    
-128   32     
528    -16    
-736   -240   
96     -320   
416    -368   
-208   208    
0      -96    
32     48     
1344   144    
-1552  720    
816    -336   
-752   32     
432    -272   
-144   144    
32     112    
-256   -224   
-64    -192   
432    -144   
-112   64     
-80    -176   
-176   48     
208    -16    
-128   16     
32     16     
368    -112   
-288   16     
112    -224   
128    -16    
160    80     
-352   -48    
-192   -320   
-128   -64    
-48    -432   
16     320    
128    -128   
-320   96     
400    -3088  
-192   -368   
1520   624    
-1504  1696   
-208   304    
512    -832   
-320   -528   
-400   208    
592    80     
-624   -512   
112    -416   
304    -144   
-112   144    
-48    -336   
48     -48    
32     -656   
96     -16    
112    144    
-240   -48    
-192   -80    
128    -256   
-272   -112   
-192   -448   
112    272    
480    -672   
-1024  384    
368    560    
544    112    
-384   -448   
-64    112    
368    32     
-176   208    
-112   -16    
-16    -96    
-192   -192   
-16    -96    
-32    -112   
-224   192    
144    96     
32     -48    
-16    384    
64     48     
-32    208    
176    -208   
176    192    
-96    -400   
112    992    
-752   832    
224    512    
-96    144    
432    752    
-288   528    
-96    688    
656    -80    
-400   -336   
-368   144    
-960   -128   
512    400    
-704   96     
688    96     
-624   -272   
-400   64     
336    -96    
-704   -160   
384    -160   
-608   48     
48     272    
-32    -128   
-128   -112   
64     -336   
64     272    
368    112    
-224   688    
-48    -128   
144    -64    
1088   -800   
-160   -448   
96     336    
-352   16     
-688   992    
336    -96    
-80    -912   
-272   -160   
-288   304    
-192   0      
704    -256   
32     -160   
-576   -416   
-288   -80    
272    128    
288    -320   
48     -64    
-240   208    
32     320    
-112   32     
32     -112   
32     192    
-272   -64    
-656   224    
416    144    
32     416    
-320   368    
-80    272    
-480   -656   
528    -192   
32     560    
-320   -96    
-384   -48    
304    -48    
192    80     
-336   0      
-256   -480   
240    320    
256    640    
-288   -464   
-144   400    
-192   -144   
-48    -256   
240    208    
128    -592   
-464   112    
112    336    
-224   160    
64     224    
-80    -144   
32     -320   
-208   -624   
-528   32     
640    512    
-384   128    
112    336    
240    -576   
-48    -464   
-304   -848   
-64    240    
160    224    
48     128    
-48    112    
80     80     
-64    16     
-176   -192   
-80    -96    
-176   48     
112    -32    
64     -272   
0      256    
-160   128    
32     0      
-32    -192   
128    80     
144    96     
-384   80     
96     -64    
-32    192    
80     144    
-112   -64    
256    -960   
-912   640    
1056   32     
-1424  672    
768    -112   
-1328  -256   
-144   32     
-48    0      
144    464    
336    240    
-224   -48    
-224   -48    
192    80     
480    0      
-560   144    
288    176    
-464   0      
-128   160    
352    -80    
-128   0      
-400   0      
-912   1312   
1808   -160   
-1312  -80    
880    -240   
-608   -112   
320    -96    
128    416    
160    -16    
-272   48     
0      128    
48     -32    
64     320    
-80    48     
-128   -16    
64     96     
240    48     
-128   192    
288    -32    
-704   192    
784    -96    
-336   240    
0      48     
-16    80     
-320   -64    
464    48     
0      -80    
-272   112    
320    64     
-272   48     
144    576    
-1968  1104   
4112   112    
-672   -32    
-1440  -192   
544    0      
992    352    
-944   320    
-112   256    
560    -96    
-352   48     
0      16     
208    80     
-128   192    
-112   48     
272    128    
-16    96     
-288   64     
192    96     
160    -32    
208    -112   
-96    144    
208    304    
672    272    
-1296  48     
592    -672   
64     176    
64     -16    
-512   112    
496    -32    
-128   0      
128    144    
112    128    
-272   80     
16     48     
-96    -192   
-48    64     
112    112    
-368   -368   
32     -128   
0      -144   
-352   -48    
32     192    
144    272    
272    -112   
-768   352    
1152   -256   
16     96     
-16    32     
-224   16     
-96    96     
112    -48    
112    -32    
64     16     
-288   -16    
-112   64     
-128   -144   
-32    -1472  
64     320    
400    208    
-128   -224   
80     368    
-64    112    
-144   64     
-400   96     
368    -112   
288    144    
224    208    
-976   176    
368    272    
16     48     
144    144    
-928   -336   
2288   -1648  
-1888  112    
1136   -400   
320    240    
-1104  -96    
352    -16    
160    208    
432    176    
-944   192    
80     -48    
416    48     
-32    -96    
112    176    
-240   144    
256    -432   
-256   32     
368    176    
-224   0      
-320   -160   
976    -144   
-560   208    
576    -64    
-704   96     
-352   -16    
368    -48    
-256   160    
240    0      
-32    -160   
-240   320    
528    -208   
-224   176    
224    -704   
-48    64     
-304   32     
192    80     
-208   -48    
464    48     
-560   -80    
-208   -128   
176    32     
96     96     
160    -48    
-272   -80    
176    224    
-224   176    
-16    128    
224    -64    
-144   32     
208    128    
-48    48     
-160   -224   
176    192    
-240   448    
688    -80    
-944   -896   
96     -384   
-80    192    
-96    -336   
496    -304   
176    16     
-384   288    
64     16     
192    160    
144    -720   
-48    144    
-96    112    
0      160    
144    -48    
272    144    
0      48     
-32    64     
48     288    
272    -752   
-128   224    
304    496    
-80    240    
592    -672   
-432   -16    
-16    -624   
-32    -96    
160    208    
144    256    
400    1424   
608    -16    
-1232  464    
384    16     
32     -192   
-64    -384   
416    -944   
112    -528   
256    -272   
48     -256   
48     -144   
-208   -464   
0      112    
528    -128   
-96    304    
160    -48    
-96    -144   
-272   32     
208    128    
144    64     
1120   -80    
-1648  768    
448    -320   
464    512    
-512   784    
320    -368   
-304   -1136  
448    320    
256    32     
-144   176    
0      64     
336    -368   
224    -976   
224    -112   
-272   -848   
144    -32    
224    64     
-144   1072   
-32    -496   
-496   304    
288    -592   
400    384    
-64    -384   
-144   -160   
-224   192    
160    208    
-48    -288   
80     -752   
176    208    
-496   -512   
128    -96    
1520   -1024  
-2160  544    
672    848    
592    1024   
-1056  32     
192    32     
832    240    
-384   -592   
-256   -592   
32     512    
-208   -224   
80     -368   
-48    -224   
16     -224   
32     -144   
96     -448   
48     32     
80     -2800  
272    -64    
64     64     
624    880    
-784   -448   
16     368    
432    -368   
-688   -208   
464    -320   
-80    -304   
-1648  -448   
256    -640   
128    32     
0      336    
-16    416    
80     -320   
144    -112   
48     -448   
480    272    
-128   -192   
-80    352    
480    192    
16     160    
192    224    
80     -80    
-640   -128   
496    -800   
400    -384   
-80    -416   
-32    -48    
112    -1376  
-912   -304   
-64    -912   
-432   160    
144    -288   
64     -96    
-480   -16    
640    320    
-1136  176    
528    -304   
-240   80     
-384   -128   
-464   96     
-48    96     
-112   0      
48     -528   
32     384    
192    -816   
-80    -16    
-144   32     
160    -144   
-208   80     
208    112    
-384   -16    
160    -912   
-1696  -608   
656    160    
-144   -464   
-32    48     
-384   144    
-400   -320   
336    1376   
512    528    
-112   176    
-272   -1280  
192    336    
192    -208   
-336   272    
-16    32     
32     64     
112    -128   
144    -128   
-496   -144   
480    240    
80     880    
192    176    
80     -128   
-704   -304   
192    -320   
208    -1696  
-192   544    
64     448    
-144   -192   
-128   -144   
352    -48    
-96    96     
-192   -160   
48     0      
-336   48     
-48    224    
272    -272   
-528   -272   
400    -16    
208    656    
32     -352   
176    224    
-224   320    
208    272    
-480   96     
288    -752   
-560   -768   
-96    16     
-16    -128   
176    -336   
336    208    
-640   -144   
-416   320    
1184   -128   
-400   144    
32     448    
-464   368    
-208   -144   
-272   -144   
176    144    
-496   -48    
304    0      
144    -16    
-16    80     
-80    -320   
80     80     
-656   -352   
64     -160   
-160   -496   
336    -864   
0      -176   
-512   -192   
-448   -208   
-160   240    
240    256    
-544   -48    
-240   -256   
272    -160   
-240   80     
-480   0      
48     160    
-336   160    
288    2240   
480    -192   
-1040  112    
-80    -128   
-64    32     
448    -16    
-656   16     
48     48     
16     -112   
-144   128    
32     -128   
-352   144    
-272   32     
704    144    
-672   80     
-272   160    
752    -240   
-768   -32    
112    -80    
-64    112    
-240   -48    
1184   -672   
-1072  368    
1328   80     
-752   -48    
-480   368    
400    16     
-304   0      
128    -32    
80     -192   
-32    96     
-288   0      
160    -80    
192    96     
-256   16     
-304   -32    
288    -96    
-64    -96    
-160   -80    
352    0      
-976   -48    
368    64     
-128   -112   
64     160    
-48    -288   
-464   128    
656    80     
-496   112    
368    16     
-128   0      
1056   -752   
-1584  -576   
-224   -160   
528    16     
432    192    
-544   -288   
-240   -128   
160    16     
-224   64     
112    -48    
-16    -16    
-128   176    
-112   0      
-160   112    
-208   64     
352    144    
-160   80     
-352   64     
96     -32    
272    128    
-304   -144   
-32    224    
-704   -416   
-992   496    
1456   -224   
-1152  -416   
-784   160    
880    -48    
-656   -192   
-32    -64    
128    240    
-256   -48    
32     96     
-48    -16    
32     96     
-48    144    
-304   64     
-320   64     
80     64     
-112   304    
192    32     
-272   32     
96     128    
-368   -512   
-208   48     
352    224    
-880   0      
944    336    
-272   -16    
48     -160   
-64    176    
32     272    
-592   80     
128    288    
-48    80     
192    272    
-400   -256   
32     64     
224    496    
-144   240    
432    32     
-592   48     
-64    16     
64     16     
112    144    
-112   -32    
-16    64     
240    48     
-240   64     
112    80     
272    96     
-592   -752   
560    -3488  
-1680  -1056  
2080   544    
-352   -192   
-192   288    
32     48     
-448   96     
400    112    
-96    -144   
192    144    
192    112    
-704   32     
288    160    
256    80     
-384   80     
208    112    
-320   112    
304    0      
16     96     
432    -416   
-944   -400   
352    -368   
96     -48    
336    64     
480    80     
-912   96     
352    320    
144    112    
-64    -32    
128    192    
-256   -96    
-96    48     
368    0      
-144   160    
160    176    
-240   144    
-384   16     
400    -208   
-256   -496   
-144   -48    
-192   80     
128    112    
528    64     
-720   -80    
128    224    
384    448    
-96    176    
48     32     
-16    128    
-288   144    
288    96     
-240   -160   
256    448    
-256   32     
-208   -96    
272    -160   
-80    48     
144    -16    
352    -992   
-208   -1360  
-240   144    
240    240    
-80    -160   
96     48     
-64    80     
-48    32     
112    224    
48     16     
-64    -144   
-112   -512   
-144   -48    
416    192    
-96    -128   
16     384    
-192   -64    
-192   80     
400    240    
-192   112    
-32    144    
112    224    
-128   -224   
-128   -48    
48     192    
336    1376   
-80    -416   
-336   224    
-432   464    
-96    -80    
0      -592   
464    -1008  
128    688    
-384   256    
-80    -48    
96     144    
64     -112   
112    48     
-352   256    
304    -224   
-112   -64    
-288   -272   
384    64     
64     528    
-32    -64    
96     -672   
-256   -160   
272    320    
-272   -64    
368    -320   
-496   -32    
-16    -16    
416    -32    
80     368    
272    208    
-208   80     
-224   -288   
32     32     
16     112    
80     192    
-64    0      
-272   16     
400    -64    
496    592    
-272   288    
-144   144    
96     -16    
112    144    
144    0      
112    -240   
-208   240    
-160   -336   
384    128    
240    -160   
-448   48     
880    1264   
-128   816    
-1232  -80    
1424   160    
-80    -352   
-928   -464   
32     336    
320    1232   
-320   -544   
352    -496   
-272   64     
-272   -160   
272    160    
240    16     
-256   -144   
-224   48     
80     -160   
-48    416    
304    -16    
-384   -528   
-176   208    
528    1376   
-560   -704   
-496   224    
544    -512   
-848   -272   
272    -144   
192    528    
112    528    
192    768    
208    336    
-160   256    
64     112    
160    -112   
-64    -80    
-48    160    
-320   112    
64     -112   
96     224    
-368   112    
208    32     
224    -1136  
176    -32    
112    -32    
-368   432    
304    32     
0      -352   
-480   32     
48     -1024  
-976   -176   
320    320    
-288   240    
160    -272   
304    176    
-368   -384   
-96    192    
-272   -80    
1136   -192   
-288   448    
-608   240    
16     -48    
224    512    
432    -16    
-416   160    
-320   240    
352    -448   
192    -2096  
400    80     
-128   -2080  
-144   -208   
64     784    
240    208    
-288   -1232  
-1072  -352   
32     0      
-112   -1136  
992    -2112  
-640   208    
-304   -176   
-48    240    
-288   -432   
208    -144   
16     64     
-208   -336   
-256   -96    
416    -640   
48     96     
256    112    
-368   16     
320    -736   
-448   -544   
848    -1232  
-288   384    
144    208    
32     320    
-352   -224   
-448   -64    
688    112    
-32    -320   
32     -288   
-208   -608   
224    16     
128    -2384  
-80    112    
-16    -176   
-16    32     
304    -384   
80     -16    
-80    -672   
-240   -608   
-16    -128   
64     112    
-480   64     
-80    -208   
-240   -112   
240    -256   
48     160    
448    -176   
-128   240    
-448   -48    
32     320    
496    128    
48     272    
-256   144    
176    -480   
-640   -128   
208    80     
-352   64     
176    32     
-144   128    
16     -208   
-32    0      
288    -352   
96     48     
208    -3088  
-160   -80    
-16    -192   
80     16     
352    128    
-720   368    
-48    48     
592    208    
-576   192    
256    -208   
-1248  -160   
48     16     
48     -192   
144    -304   
-64    80     
-16    -704   
352    -96    
-160   -96    
-48    224    
176    80     
-160   -1488  
-992   704    
944    -80    
-912   352    
864    -48    
-336   -128   
-64    -48    
-368   144    
256    32     
528    0      
-256   80     
-240   32     
208    -192   
144    -16    
416    -224   
-128   96     
-208   16     
192    -144   
-512   80     
64     176    
-800   -448   
640    -96    
592    64     
-1216  -160   
1008   -16    
-880   -256   
112    112    
352    -592   
400    64     
-272   -96    
-608   80     
592    -32    
80     96     
240    -112   
-416   80     
-48    32     
192    -32    
32     16     
32     -128   
-288   112    
272    -400   
0      80     
-144   32     
-16    -16    
160    96     
-272   -112   
16     128    
192    -64    
-128   48     
32     -16    
-1072  -880   
3696   1744   
1840   -720   
-1328  -224   
416    -416   
-1040  -304   
688    192    
224    96     
-128   336    
144    -64    
-528   96     
112    -256   
384    -64    
128    48     
-336   -96    
-112   -80    
-608   -48    
-80    0      
-592   -416   
32     -176   
-368   -112   
48     112    
528    832    
-880   32     
96     -16    
-1152  -144   
688    -560   
-288   80     
176    16     
336    80     
-160   -128   
-624   -128   
0      176    
-384   -64    
144    80     
128    176    
-144   -48    
-352   160    
-208   -80    
64     240    
-208   -96    
-64    224    
-736   80     
208    576    
-192   -208   
-256   240    
544    -64    
-448   64     
-48    -160   
-16    0      
-96    -256   
-160   80     
-128   -32    
-464   -224   
592    -128   
-160   160    
-48    -192   
-592   80     
0      -128   
-608   -240   
144    256    
112    -80    
-160   64     
-32    -144   
16     128    
0      48     
48     32     
-128   -192   
48     144    
128    64     
-176   16     
80     80     
512    992    
368    48     
-48    224    
1008   112    
-960   -240   
64     32     
288    288    
144    48     
-144   144    
64     -80    
-112   32     
-96    48     
16     -80    
-128   48     
-160   64     
208    192    
64     -32    
-448   80     
96     16     
-128   -912   
-544   -1040  
160    -336   
0      176    
-240   -64    
384    64     
-480   64     
-96    144    
416    208    
-464   224    
592    224    
-48    -80    
-496   -512   
32     -496   
112    -64    
-736   64     
-112   240    
-128   32     
336    -272   
-16    -160   
-352   -128   
64     48     
128    -96    
-272   -208   
112    -416   
-144   -512   
-64    192    
-16    752    
144    352    
-448   -272   
-528   96     
272    112    
144    0      
-272   -240   
192    -592   
-864   96     
624    -624   
144    0      
-496   32     
176    -848   
-800   -1664  
288    0      
64     1472   
-192   -48    
-112   -192   
-112   80     
-32    -16    
144    -80    
-128   160    
-144   128    
80     336    
224    400    
-16    -16    
-144   -96    
-128   16     
160    80     
48     16     
-16    32     
-112   -112   
176    112    
16     -272   
-16    -176   
-128   224    
32     80     
240    -736   
-48    -96    
-304   912    
-96    528    
368    -240   
352    -368   
48     112    
-752   16     
272    -272   
272    -112   
208    208    
-432   96     
-192   -32    
112    160    
272    176    
-288   -208   
-192   -96    
384    160    
288    -80    
0      16     
-288   -800   
-144   176    
-128   144    
-240   208    
224    112    
80     304    
-176   992    
192    496    
-800   -496   
-176   -64    
528    176    
304    -16    
-560   208    
-208   224    
320    288    
64     -96    
-16    96     
-368   -240   
-16    -144   
48     16     
-160   112    
48     -256   
96     64     
80     352    
240    400    
-272   400    
-48    -176   
144    48     
400    -16    
-128   0      
528    1232   
-576   784    
-560   352    
1024   320    
-560   752    
-224   -1504  
400    -304   
144    1536   
32     1360   
496    672    
-240   240    
-176   -128   
288    -80    
112    0      
-464   48     
-112   64     
464    80     
64     -112   
-48    -144   
-144   -224   
96     -576   
480    16     
-1840  208    
864    208    
-464   -160   
176    -688   
208    -304   
-16    208    
-144   304    
-176   144    
384    -560   
-400   0      
-128   112    
-112   -528   
64     -32    
464    -176   
-672   192    
64     48     
128    -480   
-240   -128   
112    176    
-256   208    
208    96     
384    32     
304    1184   
128    912    
-352   272    
832    0      
640    432    
-832   208    
544    -192   
256    112    
128    48     
-160   -176   
-16    48     
-256   144    
-48    288    
752    -160   
-512   -96    
-192   64     
-240   -208   
768    -240   
0      240    
16     -48    
-240   -16    
224    -1312  
224    528    
-224   -1184  
-144   144    
448    112    
400    720    
-528   1056   
-1104  448    
432    320    
-624   -272   
-144   96     
1344   304    
-160   352    
-848   368    
944    384    
-192   -208   
16     -48    
176    -736   
-256   48     
16     80     
0      48     
288    128    
-336   32     
16     80     
240    112    
64     240    
368    32     
-96    528    
272    128    
-528   144    
-208   -48    
288    48     
-128   32     
96     64     
-144   -992   
96     96     
-128   -48    
304    144    
-224   96     
-96    64     
-48    32     
48     -176   
256    128    
-224   16     
448    240    
-304   336    
80     144    
32     -320   
336    48     
0      -288   
-96    224    
48     112    
176    112    
208    304    
-48    144    
-48    208    
96     -48    
-96    32     
32     -80    
-384   -208   
192    -464   
-320   240    
16     -416   
480    48     
-48    -128   
-64    208    
80     272    
-256   304    
352    336    
160    80     
-144   176    
80     224    
-32    80     
96     -320   
160    -96    
160    -48    
32     -64    
-368   64     
224    160    
0      16     
-16    32     
16     112    
-128   -608   
16     -240   
-144   48     
96     -480   
64     -192   
48     -2352  
0      -48    
-352   1376   
1888   -336   
-1440  480    
-240   -288   
272    144    
528    -160   
-208   -1200  
-224   -160   
192    -112   
-272   256    
192    -240   
-112   80     
128    -192   
-144   -672   
-32    -128   
-96    64     
80     -176   
176    576    
-64    -288   
256    -608   
880    960    
-1504  208    
448    -16    
560    -384   
-304   -288   
224    224    
-896   -224   
-240   16     
944    32     
208    32     
-128   16     
-480   16     
352    -3328  
80     -48    
160    -208   
-336   96     
288    96     
144    208    
-64    -96    
112    96     
-528   -96    
112    -64    
-256   48     
-96    -112   
-144   -160   
256    -32    
-128   -128   
368    -1664  
-240   48     
16     0      
832    -976   
-1584  -736   
48     -16    
624    -16    
-544   -336   
-112   -32    
288    32     
-848   144    
416    -96    
-96    -32    
320    64     
-320   16     
-96    -176   
80     64     
-32    -1056  
48     80     
0      -96    
-128   208    
80     192    
-32    176    
368    64     
-112   112    
-480   272    
1472   -528   
-1232  320    
384    -256   
-480   144    
240    -176   
112    -80    
-80    -544   
-176   64     
144    -16    
240    16     
-128   48     
-128   -288   
-64    -176   
-192   -112   
208    16     
-176   -112   
-352   352    
-112   -176   
-192   -304   
144    -592   
-368   -176   
96     -656   
-400   -80    
352    112    
272    96     
16     -112   
-64    0      
-208   -48    
80     -48    
-256   112    
-80    544    
464    -352   
-304   -128   
-128   -16    
448    -384   
112    224    
288    -192   
-96    96     
-176   96     
240    -112   
96     -16    
-16    -16    
-96    144    
-32    32     
-240   -32    
448    -128   
-736   32     
-128   -144   
-416   -336   
1856   672    
-1760  -80    
880    -160   
496    112    
-80    160    
-592   -320   
-320   -96    
752    112    
272    -160   
-320   -96    
-368   -208   
48     -160   
-112   -112   
192    112    
-160   -64    
64     -48    
304    16     
-288   -352   
-240   -112   
-144   -16    
-560   -304   
-80    -16    
224    -128   
304    288    
272    -32    
-160   -224   
128    144    
368    736    
-1392  -352   
240    -928   
-64    -48    
-32    208    
-64    144    
-352   -112   
224    -288   
-160   464    
-192   192    
-528   -320   
-32    -240   
112    400    
176    144    
-80    -32    
-240   -144   
-144   -240   
192    -64    
304    128    
-528   -96    
80     -1280  
48     32     
-144   176    
32     -224   
-32    0      
64     592    
-208   80     
-736   -464   
912    -400   
304    32     
-272   -208   
-336   -96    
528    752    
-64    544    
336    112    
-288   -176   
-272   -16    
96     112    
144    128    
32     -16    
-144   -16    
-16    -384   
-240   -544   
-96    288    
0      -128   
16     192    
112    80     
48     32     
-64    -32    
-96    272    
-48    400    
112    -192   
368    -112   
-288   32     
80     112    
32     -48    
-160   -304   
128    -352   
-432   160    
-640   400    
528    208    
16     -80    
-32    -448   
-688   -1312  
128    -16    
288    144    
160    0      
-256   144    
-192   -144   
-320   160    
144    16     
-16    -112   
-48    160    
16     176    
-240   32     
-16    0      
-576   -928   
-432   -128   
560    80     
-784   288    
640    128    
-176   48     
-304   480    
304    -16    
-288   -592   
64     96     
224    256    
16     0      
-256   48     
-208   -32    
144    208    
-656   -112   
-240   32     
-192   -672   
304    752    
80     80     
-176   256    
-288   -16    
96     0      
352    272    
192    48     
-240   352    
-528   -272   
416    224    
384    -32    
-480   288    
704    -352   
-2368  528    
224    -768   
-160   -240   
464    -576   
-1056  -256   
640    -256   
-96    -48    
-272   16     
96     16     
-48    48     
-288   -112   
256    96     
-96    -112   
-368   64     
-208   0      
96     112    
-80    48     
128    160    
-208   16     
112    176    
96     784    
-32    -480   
-720   384    
288    752    
368    896    
240    464    
-144   -32    
80     -80    
32     64     
-64    -208   
-448   -16    
256    176    
32     96     
144    160    
-160   32     
-480   128    
208    -80    
80     48     
-224   128    
32     192    
-96    0      
96     112    
240    208    
-1008  288    
528    16     
-256   144    
448    368    
-416   64     
1008   -416   
-64    0      
-112   144    
-272   112    
-128   48     
48     -16    
224    112    
-208   -32    
-128   32     
-496   -112   
-48    -48    
-224   96     
176    32     
176    176    
-208   80     
0      192    
-96    64     
144    96     
336    32     
-16    128    
-144   -32    
96     64     
-112   -512   
-16    -1216  
-1584  -1136  
1504   160    
-112   0      
352    -64    
-656   544    
-48    -128   
32     448    
448    256    
-352   208    
128    48     
0      -16    
-144   -112   
272    176    
-240   -64    
528    144    
-336   96     
80     128    
-416   -176   
624    -240   
-16    -112   
-304   176    
224    352    
32     144    
-112   80     
432    -48    
-32    96     
-240   -48    
128    176    
224    -112   
-80    96     
-240   144    
544    96     
-208   48     
-192   80     
96     144    
288    288    
-144   32     
160    304    
208    32     
-240   96     
352    128    
-496   32     
336    144    
320    272    
-112   32     
-208   352    
176    272    
496    80     
-400   64     
-48    80     
272    80     
-128   -240   
688    -48    
-224   240    
320    -240   
-288   400    
528    -496   
-16    -128   
-16    64     
-336   -288   
256    96     
96     -832   
32     160    
112    160    
-176   192    
192    -48    
32     336    
-160   400    
368    96     
48     -224   
-208   16     
-32    -32    
256    336    
-192   288    
64     -64    
16     -208   
272    -336   
-688   640    
272    -400   
336    144    
-144   368    
1104   1936   
-2256  -32    
496    -64    
1248   -384   
-768   32     
16     384    
-48    0      
336    160    
-16    -208   
-16    160    
304    -32    
-192   64     
448    -704   
-368   128    
288    -352   
-32    288    
320    -80    
16     400    
-400   176    
80     -16    
144    32     
-384   -832   
-80    176    
1072   -160   
-1792  288    
1328   -240   
208    128    
-352   -256   
-560   -240   
352    -1264  
144    48     
-160   -144   
144    224    
-272   48     
48     112    
80     16     
144    -192   
-352   144    
144    -128   
32     176    
352    -160   
-272   208    
16     -960   
112    16     
-160   128    
448    144    
-80    48     
-304   256    
240    80     
32     160    
352    -64    
-1648  -1792  
-1184  -400   
2320   -240   
-1776  128    
976    -16    
-80    208    
-480   -288   
416    496    
16     -16    
304    208    
-304   16     
64     96     
112    32     
-80    -112   
-80    192    
416    -208   
-144   64     
-144   144    
384    -96    
-128   -160   
-112   16     
320    336    
128    -224   
-560   32     
32     -240   
96     -400   
192    -608   
-336   192    
512    64     
-240   -640   
-160   16     
32     -1344  
112    -224   
160    80     
0      32     
-16    32     
-16    48     
240    -2256  
16     -16    
-112   -512   
112    48     
192    -16    
16     64     
-128   -128   
288    112    
-128   -144   
352    -512   
128    304    
-80    -1712  
-320   16     
144    32     
416    -320   
-224   -160   
448    -32    
-176   -112   
160    96     
-384   64     
800    -368   
-1120  -64    
-304   -256   
240    -96    
256    -16    
64     -16    
-176   -416   
-112   16     
272    -3312  
-128   -208   
512    -576   
-272   192    
688    128    
-608   -528   
192    -464   
-592   816    
-448   416    
-784   496    
192    -592   
96     144    
32     -288   
-336   944    
224    304    
288    -1568  
192    16     
144    -96    
-192   -112   
-384   -560   
512    464    
-80    -304   
48     -240   
-80    720    
64     -336   
-128   144    
-48    -448   
32     -144   
112    -240   
-16    -176   
-256   -736   
-240   -336   
176    -336   
-112   -512   
128    96     
0      128    
-128   240    
160    400    
-144   -208   
-112   -160   
-288   80     
16     -160   
-272   144    
96     208    
32     816    
432    -416   
-176   -304   
-96    -2368  
208    -32    
160    80     
64     0      
-144   0      
-144   448    
240    432    
336    144    
-272   304    
-544   -688   
-96    208    
80     96     
-80    928    
816    272    
-288   256    
-48    -16    
-16    160    
112    -144   
-224   128    
112    -1296  
-256   -304   
-336   -160   
304    32     
224    528    
-176   -32    
-464   240    
224    -208   
-112   112    
192    -560   
-112   80     
-32    -16    
176    112    
-208   -48    
208    -400   
64     -16    
-16    144    
256    464    
-400   416    
96     128    
352    -176   
-288   80     
-304   -512   
-64    -768   
0      16     
-128   224    
48     -112   
-48    352    
48     128    
432    -64    
-704   -64    
-32    -1008  
400    224    
176    560    
-320   -176   
-64    240    
-128   -48    
224    -32    
384    32     
-224   256    
-400   -112   
-592   -608   
-848   144    
688    -320   
-1984  240    
272    352    
-208   272    
-96    -608   
512    400    
-720   -144   
0      -32    
464    -224   
80     288    
-112   64     
-176   -352   
-160   -240   
176    96     
-64    48     
-32    -16    
-336   64     
-128   -160   
32     144    
16     96     
-96    32     
-64    80     
48     -32    
112    64     
-304   32     
208    96     
-352   -96    
256    128    
-48    16     
64     -272   
960    576    
-1344  1184   
272    -256   
448    -352   
-1232  240    
416    144    
256    80     
-432   -64    
192    -112   
-384   -288   
64     64     
-256   0      
208    80     
-96    -64    
96     -48    
-240   64     
224    48     
-192   -96    
240    -192   
-48    -32    
-368   128    
-112   -16    
-752   736    
528    16     
-320   -192   
320    96     
-64    -16    
-304   80     
368    -128   
-128   -112   
-240   64     
-416   -16    
432    96     
96     -32    
-144   48     
-736   -144   
336    48     
-256   -48    
-16    288    
-128   -320   
-208   -144   
112    -64    
144    208    
432    304    
-1120  384    
-288   -112   
176    -128   
464    -224   
448    160    
-944   -320   
-480   -160   
112    -16    
-144   -16    
32     48     
-432   -192   
208    -16    
176    -32    
128    -80    
-144   48     
-128   64     
432    -96    
144    160    
-288   96     
-48    -160   
64     80     
-32    -176   
-128   -48    
64     -112   
-128   464    
-176   -32    
64     -1040  
368    -576   
-1360  1648   
1264   -512   
-1136  -144   
864    -128   
16     -256   
64     48     
-288   48     
112    32     
272    96     
-464   32     
208    -352   
-80    64     
-224   -64    
160    272    
-304   80     
16     160    
240    32     
-336   64     
-208   -256   
624    544    
272    -208   
-880   192    
560    176    
-832   -112   
496    112    
960    80     
-960   64     
96     80     
304    -64    
64     -16    
-80    96     
-288   48     
192    144    
-608   -16    
992    192    
-272   96     
-96    48     
-256   -48    
-48    0      
336    208    
-16    144    
112    64     
-256   128    
-176   -112   
352    112    
288    80     
-640   -112   
352    -304   
32     16     
192    32     
208    144    
-592   48     
656    544    
-960   64     
560    64     
32     32     
-624   -48    
320    32     
0      -80    
16     -48    
-320   64     
336    0      
304    128    
-240   128    
0      208    
-176   144    
32     -16    
352    0      
-80    -80    
-128   336    
-368   16     
144    -80    
96     64     
-96    128    
160    80     
-64    112    
16     -32    
112    -160   
16     160    
-32    16     
0      -320   
64     -32    
-1040  400    
1248   -320   
-1408  160    
-112   -48    
1328   240    
-512   112    
-208   112    
-128   -48    
320    96     
64     176    
0      48     
-48    176    
-336   96     
480    160    
128    -96    
-32    224    
-352   96     
-32    -144   
208    16     
-80    208    
-448   -16    
560    432    
832    -16    
-944   176    
144    32     
-208   16     
-112   32     
352    64     
304    64     
-256   -80    
-368   64     
352    64     
336    0      
-272   64     
-112   -96    
144    0      
-160   112    
528    -112   
-368   208    
-112   32     
160    48     
48     -112   
416    -80    
-560   48     
256    16     
-80    208    
64     208    
-96    -288   
64     64     
-224   -2448  
272    592    
-128   64     
2048   208    
-1248  256    
144    -16    
304    128    
128    -112   
352    -240   
-224   -32    
96     48     
48     96     
160    160    
112    -608   
-32    144    
96     -752   
-272   96     
192    80     
-80    160    
-48    416    
16     160    
-144   32     
144    112    
-496   400    
1760   -304   
-784   -256   
-672   544    
304    384    
-400   -1024  
576    -624   
-96    48     
-304   352    
384    160    
-176   208    
48     64     
-64    128    
32     -224   
464    208    
-64    176    
-32    80     
-96    64     
0      64     
0      32     
80     -32    
-112   112    
224    -496   
-64    -160   
-144   -1504  
320    16     
96     -416   
-544   -128   
320    -64    
80     176    
64     16     
-96    -112   
160    -64    
-304   128    
-272   -224   
304    -368   
-864   128    
-176   -432   
256    208    
304    -208   
-64    128    
-32    -128   
-32    224    
144    48     
-80    112    
368    256    
-560   352    
-16    0      
-32    64     
368    144    
-544   -432   
480    496    
960    -496   
-1200  176    
304    32     
-208   272    
656    48     
112    864    
-448   -560   
-208   176    
208    560    
448    256    
-64    -240   
-368   48     
-16    336    
560    -208   
0      -96    
-288   -16    
-16    -224   
-16    -592   
128    -448   
-240   -416   
16     192    
256    368    
416    80     
-560   64     
208    224    
96     64     
-160   -832   
96     -1456  
-176   80     
16     192    
432    32     
-336   -224   
0      -752   
128    -400   
-32    0      
176    -656   
48     32     
32     -1840  
-256   336    
80     -368   
-64    -1328  
128    320    
48     -1776  
32     -208   
-96    -480   
-384   -224   
256    -16    
-48    128    
160    -304   
-32    96     
16     192    
224    32     
32     384    
336    416    
-64    -64    
48     -192   
224    400    
208    816    
-400   -736   
224    -1520  
16     112    
16     48     
-80    144    
-80    -640   
0      288    
-16    144    
400    192    
-32    -64    
-208   -144   
-640   96     
-128   176    
240    -400   
96     80     
80     -240   
-128   -48    
-16    304    
288    -1552  
16     320    
64     -1056  
-208   -144   
-336   -912   
992    -1392  
416    656    
192    -208   
-272   880    
496    -832   
-416   -224   
80     176    
-80    320    
64     -448   
0      192    
32     -2208  
0      112    
240    160    
-192   0      
-48    32     
224    -224   
-160   16     
368    48     
-272   -16    
112    128    
-800   -880   
480    -592   
-320   -416   
-128   -608   
336    -224   
-480   -800   
384    -368   
-128   -48    
64     112    
160    -160   
-112   -32    
-208   -160   
176    256    
-176   -32    
-16    32     
-160   336    
-336   416    
336    -432   
-96    -128   
32     -160   
32     -80    
176    160    
-112   -448   
96     32     
208    0      
-176   -64    
48     176    
48     64     
112    16     
0      -48    
576    -1328  
-1824  -928   
-304   144    
544    -112   
-320   160    
-368   -448   
336    32     
80     -240   
-48    256    
128    -48    
-144   -16    
-144   -64    
192    -48    
-352   -128   
0      48     
-48    32     
176    -32    
-80    -48    
-272   -256   
144    80     
-80    -336   
0      256    
-384   80     
1184   -480   
-976   224    
272    -112   
-448   144    
320    96     
-32    -160   
-208   -80    
32     -16    
-80    -48    
176    -32    
128    -208   
-48    96     
-128   -48    
-64    144    
288    -176   
-96    -64    
336    -256   
-400   160    
48     32     
352    48     
-336   -208   
128    -224   
592    288    
-16    272    
48     384    
-80    48     
-336   272    
-544   -176   
512    176    
-112   -416   
-1008  -192   
-160   -32    
320    48     
-256   144    
-96    176    
-80    0      
192    -256   
176    -16    
-288   -416   
-272   -96    
384    -160   
-208   128    
-624   -208   
-160   64     
48     256    
560    -192   
-304   -144   
176    96     
496    672    
-160   -1328  
-1920  976    
912    96     
48     16     
128    272    
-672   -160   
-160   -272   
-112   -176   
448    -448   
-320   -192   
32     -48    
-240   32     
-192   192    
432    -176   
-496   48     
48     -32    
-896   -16    
16     32     
96     80     
-112   -432   
-768   80     
688    -192   
-464   112    
1248   -128   
-592   -96    
-272   48     
208    0      
-224   80     
288    -208   
-592   -48    
272    -48    
-656   -64    
480    -32    
-160   -32    
-1264  -96    
-288   128    
448    16     
-176   96     
-48    64     
496    112    
-240   96     
160    48     
-144   32     
80     64     
208    0      
-384   16     
-48    32     
80     32     
-16    160    
-784   -304   
-96    -128   
-128   48     
-144   -304   
608    -208   
-256   112    
112    16     
208    176    
-304   -64    
-32    16     
128    144    
-64    -96    
48     -160   
-592   -80    
80     192    
-224   176    
48     192    
272    -48    
-64    80     
-48    -128   
-256   0      
160    -64    
0      160    
112    128    
-32    192    
-176   192    
-112   -128   
48     -272   
-32    -192   
-112   96     
-80    320    
384    288    
-368   -144   
-384   -624   
1072   -864   
-688   752    
1200   -128   
-320   -128   
-688   -272   
224    -192   
928    32     
-336   16     
-384   112    
96     -32    
288    96     
-208   -176   
0      176    
-240   -160   
480    -144   
-656   208    
768    -416   
-128   128    
-48    -64    
-112   32     
1152   624    
-1856  576    
992    208    
-176   608    
-784   -32    
352    32     
192    16     
48     -32    
-576   -224   
432    -320   
96     176    
0      144    
208    80     
-48    128    
-192   -16    
0      160    
288    304    
-656   96     
256    256    
-112   -160   
96     0      
-304   272    
304    64     
16     -128   
-32    -112   
-16    80     
-80    320    
0      80     
192    0      
112    32     
96     464    
496    -320   
-1328  -32    
1184   448    
-432   320    
-96    96     
-192   -304   
624    -1104  
-352   -256   
160    80     
160    320    
-304   160    
272    96     
32     -96    
160    0      
-144   -48    
32     96     
32     -16    
-32    144    
-32    32     
48     176    
-16    416    
656    -352   
-2032  288    
1824   -336   
-144   32     
-784   80     
464    240    
192    208    
-160   48     
-224   -32    
160    336    
-96    208    
112    432    
-16    272    
-80    432    
80     224    
192    0      
-112   48     
384    544    
-432   544    
32     128    
208    112    
272    288    
-464   112    
512    -112   
-480   -848   
-192   -384   
416    544    
128    -32    
-240   -480   
320    432    
-544   96     
640    48     
-32    32     
32     32     
-48    128    
-608   64     
432    64     
192    -304   
-704   -32    
144    64     
-208   -112   
256    64     
160    208    
-416   -416   
-16    80     
192    32     
-64    -64    
288    96     
-272   304    
16     80     
1264   1888   
-1248  896    
-16    480    
1520   64     
0      768    
-800   -432   
96     -384   
640    96     
160    -544   
-304   -528   
-176   272    
-32    -240   
752    -64    
-192   576    
-304   -112   
400    112    
160    288    
48     288    
304    -208   
-160   -320   
-112   -224   
192    320    
432    128    
-944   -896   
400    0      
208    -1408  
-688   -352   
608    -208   
-864   -1072  
544    -320   
-128   464    
96     128    
160    96     
-96    448    
-224   304    
-144   304    
208    -320   
32     -448   
-240   96     
192    784    
64     640    
-96    512    
160    0      
-368   432    
320    496    
-64    -480   
-32    288    
-192   640    
-320   -624   
768    112    
-96    560    
-144   176    
-224   1088   
880    -160   
272    -416   
-1296  864    
608    512    
-80    -2624  
304    -64    
16     -48    
-80    544    
-192   96     
240    160    
272    -64    
32     272    
-112   384    
224    176    
64     144    
-96    -80    
-64    48     
320    448    
-48    640    
112    384    
304    224    
-96    96     
-208   112    
144    16     
320    576    
-432   624    
16     224    
160    128    
32     -64    
128    -1152  
-928   384    
432    80     
-368   -48    
496    336    
-176   80     
-32    48     
-448   -304   
720    -304   
-144   176    
144    240    
64     224    
32     16     
32     -128   
-16    -272   
-320   80     
224    -288   
240    16     
-144   16     
272    112    
-608   -720   
976    -864   
-880   448    
1440   240    
-352   16     
-272   272    
96     -144   
-48    192    
848    272    
-640   0      
80     64     
48     -16    
272    208    
0      -64    
-192   48     
192    -304   
64     192    
48     144    
-64    -912   
0      96     
-144   -1584  
128    -1216  
272    -16    
-368   -848   
272    -16    
-224   -848   
336    -96    
-64    208    
-64    -112   
48     144    
-416   -592   
1248   -960   
-1952  384    
992    -608   
896    224    
-816   -704   
192    32     
-64    96     
0      16     
32     -176   
-128   -768   
32     -96    
-144   -496   
208    16     
-160   -80    
176    48     
0      -176   
-48    32     
96     -272   
96     80     
-32    48     
32     112    
-544   -496   
-176   16     
144    -656   
320    -368   
-528   112    
560    -576   
240    -304   
-512   -384   
-160   0      
80     0      
704    96     
32     -16    
-464   176    
48     144    
112    -128   
-704   16     
-224   -256   
128    -64    
-48    352    
-688   -16    
240    -400   
64     0      
656    -480   
-592   224    
400    240    
288    304    
464    400    
-704   272    
-368   -352   
768    -320   
352    176    
-336   -96    
-784   -256   
16     -176   
480    -16    
0      -624   
-288   32     
48     -432   
272    -96    
864    -256   
-128   240    
-64    -32    
-144   0      
64     -16    
-32    -192   
176    48     
-208   0      
-336   0      
-416   -80    
496    864    
-1616  -1120  
128    1040   
1168   -640   
-1936  -320   
1088   32     
320    176    
-432   -48    
-224   48     
240    -64    
-208   96     
512    128    
-240   -208   
-176   -32    
-32    -112   
-768   -80    
352    -304   
-112   144    
64     -624   
-128   96     
-144   -1312  
512    272    
-816   256    
368    -80    
304    48     
48     -32    
-384   -32    
64     16     
-400   -32    
80     0      
352    -32    
-512   -144   
128    112    
32     -144   
288    96     
-144   -16    
368    -16    
128    192    
-320   48     
-208   208    
288    160    
-224   64     
-160   -80    
-64    -64    
-48    -272   
112    -144   
384    -192   
-128   160    
-64    32     
304    208    
-160   -128   
48     208    
80     96     
512    448    
-1104  304    
496    -704   
-256   -736   
32     16     
48     448    
32     96     
-160   208    
16     -80    
48     352    
-80    16     
96     -48    
-176   -176   
112    -336   
-176   -32    
-768   -192   
32     0      
208    -288   
-256   144    
16     -16    
0      112    
-848   -16    
-32    112    
-48    -48    
-48    -112   
-96    -528   
176    -592   
128    464    
-96    176    
16     272    
832    832    
-1760  848    
528    -416   
176    320    
-448   320    
-48    80     
-160   -48    
288    -464   
-64    -240   
304    336    
-272   576    
-128   64     
224    64     
-16    144    
-304   560    
-240   -272   
32     -112   
-288   416    
-256   -368   
-1040  144    
144    64     
-1184  -64    
1792   176    
-688   -400   
-384   -736   
240    176    
-96    640    
192    416    
208    -880   
-400   -80    
-624   752    
-32    -304   
464    -96    
96     -112   
-496   352    
-160   80     
192    -128   
48     400    
-112   -352   
32     368    
-48    256    
128    -160   
-128   144    
-128   144    
224    176    
-80    -112   
-416   144    
0      48     
224    -48    
-128   -80    
-464   352    
-16    -528   
-1920  256    
1216   -800   
-384   -352   
-368   -768   
-256   -288   
-144   -160   
-352   736    
464    -1520  
-16    400    
-48    208    
-48    160    
-144   -144   
112    -192   
-176   -16    
-256   -96    
-112   80     
48     -208   
16     256    
-80    208    
-160   48     
-400   -976   
352    -144   
0      -96    
-320   496    
288    912    
-528   208    
560    304    
-544   672    
352    640    
48     608    
-128   432    
224    48     
48     64     
-416   32     
32     112    
704    -64    
-496   160    
304    144    
-336   160    
80     192    
-112   -32    
96     0      
96     -480   
320    1072   
-880   640    
-144   -144   
528    -496   
528    -64    
-352   80     
16     336    
-16    16     
64     -48    
16     0      
-80    32     
-400   16     
64     -304   
368    -32    
-240   -48    
-176   432    
288    -128   
-160   -192   
-320   112    
192    144    
-96    224    
144    96     
16     400    
-480   112    
304    192    
96     -128   
160    16     
-320   96     
-672   1568   
1104   80     
-720   144    
-320   -80    
400    480    
448    768    
-464   16     
16     -272   
-16    -16    
48     752    
144    -144   
-192   96     
96     -384   
-96    256    
128    -256   
48     128    
-48    0      
368    192    
-64    -112   
-160   160    
64     256    
112    128    
-304   192    
608    736    
224    448    
-544   736    
912    208    
-720   -96    
656    272    
-192   160    
32     64     
0      -432   
-224   352    
112    -80    
-48    208    
-144   -16    
224    432    
272    -208   
-144   -96    
-160   -32    
112    -368   
224    -384   
-352   -256   
-80    320    
-128   320    
256    416    
0      160    
32     528    
352    384    
-128   -32    
-32    -32    
16     96     
416    944    
-272   816    
16     224    
384    80     
656    -464   
-1280  -624   
-304   48     
480    -64    
320    160    
-384   -80    
-144   -720   
32     0      
240    16     
192    192    
-192   64     
-64    -32    
192    256    
-32    208    
-32    -192   
112    -48    
-208   -112   
336    0      
-48    32     
-144   128    
48     224    
-80    -832   
144    -112   
80     16     
-80    112    
0      144    
-560   -1600  
480    -112   
-176   160    
-528   192    
1280   224    
-784   368    
128    112    
-112   240    
112    -112   
192    224    
432    -32    
-416   32     
-160   288    
128    144    
560    0      
-224   256    
64     -112   
-224   128    
624    144    
160    16     
-928   -208   
144    656    
704    192    
-800   -176   
928    32     
-1024  -288   
64     256    
880    -2240  
-32    128    
-96    -128   
-480   112    
544    48     
256    96     
-160   -304   
-256   64     
336    -80    
-96    192    
304    -128   
-384   -80    
288    48     
-368   -176   
592    96     
-80    -176   
-80    144    
80     96     
128    192    
-144   144    
416    80     
-368   0      
176    32     
-16    368    
512    -576   
-752   1120   
1520   -64    
-784   -368   
16     16     
256    256    
-304   -64    
624    16     
-80    -1312  
-64    128    
-32    16     
64     112    
272    80     
-240   -32    
-192   0      
272    144    
-80    112    
80     -48    
48     96     
-16    -80    
-96    128    
224    -848   
-752   480    
592    -544   
-880   -240   
480    -64    
416    96     
-768   112    
288    -16    
-192   -32    
32     -32    
-128   192    
-48    -112   
128    80     
-144   -656   
208    160    
-32    -112   
-48    0      
336    272    
-144   160    
-192   -144   
240    112    
160    544    
-144   0      
-192   112    
1184   16     
-432   32     
240    -800   
-944   -288   
-176   -48    
-32    -64    
-544   128    
288    -16    
-304   -32    
0      128    
-240   -192   
-144   -160   
0      128    
-96    16     
-48    224    
176    -576   
0      48     
0      -528   
-96    64     
-16    -64    
112    128    
192    80     
-160   64     
96     -32    
192    192    
-144   32     
-1072  -1712  
2288   -1536  
-624   -240   
-416   -144   
-384   -128   
32     -640   
624    -80    
96     -880   
-656   32     
128    144    
0      -160   
368    288    
128    0      
-496   -384   
64     32     
272    -512   
160    -48    
-96    -96    
176    -304   
-352   -576   
432    -928   
-208   -144   
64     -528   
-224   112    
-352   -1728  
-112   -368   
896    -608   
-288   0      
-64    -112   
-96    80     
304    -144   
208    -80    
-624   -16    
32     -80    
-160   -112   
-384   0      
176    320    
-272   96     
496    208    
0      -160   
48     336    
80     -80    
-128   96     
272    128    
-176   112    
-192   32     
544    400    
-288   384    
-240   32     
-512   -192   
160    -80    
-208   -176   
-336   144    
-352   -544   
848    -80    
-256   -48    
-96    -1232  
-32    192    
448    -112   
112    544    
-256   -272   
-208   -496   
288    0      
208    16     
112    -80    
-48    -192   
-608   304    
64     -16    
272    -144   
-144   -592   
-416   144    
-48    -1520  
-16    160    
112    96     
-32    80     
-224   144    
16     320    
-80    32     
-48    -176   
-336   528    
176    576    
-560   -512   
128    -32    
-48    -432   
448    -1312  
-208   800    
576    144    
-272   48     
-192   352    
-112   368    
112    -432   
128    48     
0      -16    
-96    272    
-192   224    
272    -208   
-544   -16    
-80    -32    
-272   192    
96     -112   
48     96     
0      -336   
-240   144    
-208   -528   
608    240    
624    -384   
-640   368    
-432   816    
32     -304   
96     -176   
448    -688   
-464   -512   
0      -496   
208    304    
464    144    
-80    -48    
-384   32     
-128   -16    
368    -240   
48     -272   
-272   64     
112    128    
-416   -16    
240    -128   
-128   -96    
112    -240   
-32    -48    
-96    -128   
-96    352    
352    -464   
-208   112    
0      -352   
32     -464   
-256   -528   
-208   -848   
-1024  816    
1408   -656   
-1408  -480   
880    -720   
480    704    
-528   512    
-336   -1888  
272    -816   
320    1200   
-432   -544   
112    336    
-464   -368   
336    -64    
160    240    
-864   0      
-288   48     
-736   336    
272    192    
-64    -272   
-32    80     
-784   160    
1888   -288   
-960   -48    
-224   480    
208    -544   
544    -912   
-384   -960   
-480   448    
464    96     
-448   192    
16     96     
112    160    
16     80     
-768   32     
64     -32    
48     -32    
-16    -240   
368    -416   
-208   -32    
144    16     
96     144    
-320   -192   
-224   -208   
-256   -192   
912    96     
-32    272    
-208   64     
320    -192   
-208   -48    
-176   -416   
0      -48    
-96    192    
-288   160    
544    0      
-176   -320   
-288   -480   
496    -592   
-96    112    
816    160    
-352   64     
-80    -32    
16     0      
256    224    
-576   64     
-96    16     
-384   -144   
288    128    
-288   -224   
-192   -48    
368    -848   
1296   2320   
-1072  1104   
768    288    
1152   96     
-992   112    
-560   544    
192    48     
-16    96     
-96    -48    
0      144    
-176   -32    
-192   288    
-96    -128   
-224   112    
-544   -128   
528    272    
224    0      
-272   160    
-224   -16    
0      496    
288    -672   
-400   -464   
-48    -144   
0      176    
-384   -112   
48     -48    
-128   16     
-800   176    
112    -16    
-832   -544   
720    -160   
-160   0      
112    288    
96     192    
-96    176    
304    144    
144    144    
-464   96     
208    112    
432    352    
-272   48     
-176   48     
-496   -144   
256    -16    
144    112    
208    96     
-80    48     
-320   128    
272    -32    
-48    -32    
-64    128    
272    144    
-64    48     
-416   400    
560    32     
-336   -176   
-304   288    
576    -96    
-48    64     
-96    560    
-208   288    
352    48     
96     -16    
-144   176    
-176   256    
32     176    
256    -64    
208    -16    
-624   192    
-16    304    
336    -192   
16     192    
-272   -32    
-112   0      
240    16     
32     192    
-16    64     
64     -112   
-256   -112   
112    160    
128    144    
-80    0      
1152   336    
-2672  768    
1312   -16    
544    -272   
-1264  400    
464    -96    
-448   112    
352    16     
16     336    
416    -96    
-752   96     
320    0      
368    80     
-224   96     
400    -176   
-576   288    
320    -32    
-16    -32    
-240   -48    
0      192    
128    128    
-896   1168   
1776   -256   
-944   -208   
-1056  -160   
976    80     
-96    304    
80     -16    
-176   0      
-96    48     
-112   16     
-32    -48    
256    64     
-128   64     
-128   80     
416    48     
-48    16     
-128   -128   
160    -176   
-448   80     
736    64     
-272   192    
256    -64    
-464   16     
0      -48    
656    144    
-624   64     
560    112    
-368   80     
48     48     
-896   -272   
2096   -2224  
-1568  272    
1536   128    
288    96     
-1248  -112   
496    80     
352    128    
272    0      
-352   -64    
-80    128    
-64    48     
208    80     
-32    -32    
-96    -160   
-208   32     
208    128    
64     128    
-48    64     
16     144    
-144   64     
96     80     
512    672    
-1120  64     
256    -64    
-192   112    
16     -80    
352    240    
-288   96     
-128   -864   
752    -144   
-208   176    
-128   96     
-64    48     
32     96     
112    0      
-128   176    
144    64     
-16    288    
112    144    
80     -16    
-64    80     
144    224    
32     64     
-592   -160   
624    112    
0      80     
48     80     
-304   -144   
304    -48    
-192   176    
-144   80     
272    -80    
176    128    
-96    -512   
-112   96     
208    -48    
-80    16     
112    112    
-464   -272   
352    176    
112    -128   
-528   80     
448    64     
80     112    
-32    176    
-64    80     
48     160    
80     224    
256    96     
80     160    
-32    48     
-816   -672   
1344   -1264  
-32    16     
880    80     
-1264  -576   
-48    448    
784    48     
192    144    
-80    304    
-608   176    
624    112    
96     144    
96     48     
-160   112    
-192   96     
240    -160   
-32    112    
16     -272   
-16    160    
512    -144   
-976   -576   
320    -1088  
-176   -432   
16     48     
704    144    
-528   112    
64     96     
192    144    
352    16     
-480   -32    
64     -640   
432    -176   
192    640    
-128   80     
-352   -928   
160    288    
224    -608   
-544   -16    
640    176    
32     1040   
16     128    
128    16     
32     -128   
96     96     
-128   352    
240    -64    
-80    -832   
-464   -1184  
528    400    
-16    400    
96     224    
-128   -176   
64     720    
-96    16     
-112   48     
944    368    
-288   352    
-32    544    
64     -144   
-256   -176   
192    240    
352    -352   
-208   -192   
-144   0      
208    -80    
-16    496    
-16    -512   
80     -336   
-64    -128   
96     528    
112    160    
32     128    
16     160    
-64    -80    
80     -288   
144    -192   
-144   48     
16     -96    
0      -16    
256    -160   
144    128    
-16    -48    
48     -640   
-400   0      
608    -416   
-752   224    
480    -1216  
32     112    
32     -592   
96     -1424  
112    -128   
-112   64     
-16    0      
224    416    
-48    96     
-224   -752   
320    -80    
64     -720   
-16    64     
-32    224    
128    480    
-832   -16    
-64    -240   
48     -704   
-736   -416   
576    32     
-240   -144   
240    -240   
-224   -1280  
-192   240    
192    944    
-64    720    
656    -384   
-64    0      
-608   -352   
304    -112   
0      -272   
-256   80     
-960   -32    
208    -560   
368    -80    
16     368    
-224   -272   
-240   -688   
64     -48    
240    304    
-112   384    
96     128    
-240   -64    
544    -272   
-240   128    
176    320    
-160   864    
1216   656    
-1888  864    
-368   -80    
240    -416   
432    192    
-608   -560   
-208   80     
-288   288    
784    960    
208    -336   
-624   -272   
-112   48     
368    64     
-64    -32    
-192   -32    
-176   64     
0      -288   
-416   -400   
-80    -448   
32     -288   
-48    -640   
416    -80    
-1584  0      
880    -304   
-256   -352   
-336   -240   
-160   -944   
-224   -816   
96     -144   
-528   -16    
-224   -32    
336    80     
-496   -16    
-32    -48    
-416   -32    
256    48     
64     48     
48     -192   
-16    0      
-352   80     
16     -48    
16     0      
192    -272   
128    -176   
624    -128   
32     832    
-416   176    
-32    -96    
208    -144   
144    16     
288    560    
-416   176    
-288   -320   
816    112    
-368   -2512  
-128   80     
32     -224   
-96    -480   
336    -416   
-32    192    
-528   -48    
-160   -80    
384    112    
-256   -144   
16     400    
32     -176   
128    352    
512    -336   
-256   112    
240    -16    
-80    560    
-288   -336   
-48    2272   
1040   240    
-1728  -96    
272    -48    
768    -16    
160    208    
-544   -80    
80     304    
-48    -208   
256    208    
544    -176   
-336   32     
-368   -80    
240    48     
464    -32    
-112   80     
-496   -64    
304    -48    
-416   -256   
992    -528   
-304   144    
32     0      
-400   16     
-576   -112   
576    64     
-608   48     
-400   80     
0      144    
-64    80     
128    -144   
-1120  192    
64     64     
-320   -32    
144    80     
176    112    
-304   -32    
-208   -368   
192    256    
-80    352    
320    432    
-80    -32    
-480   -80    
-96    -16    
240    -144   
16     32     
-144   48     
-416   80     
96     32     
208    -32    
-256   -320   
144    -112   
-352   -112   
576    544    
-480   112    
-208   -176   
976    -416   
-816   128    
336    176    
-16    0      
-128   304    
144    176    
32     80     
-304   -160   
-336   32     
-224   -112   
480    -128   
-16    -176   
32     160    
-272   0      
-16    -96    
304    -32    
128    64     
-416   128    
-80    96     
144    -48    
-32    64     
80     -96    
-112   -48    
-160   -144   
-672   -32    
272    112    
-16    32     
0      -1584  
-1408  496    
1168   192    
-688   416    
624    96     
-240   -176   
-368   128    
-224   -256   
272    -64    
128    112    
-192   80     
80     96     
-96    48     
-176   32     
144    -208   
-208   160    
32     -112   
144    -128   
-256   -128   
32     -16    
0      320    
-480   1136   
1792   -160   
-1792  -176   
256    0      
256    -16    
-32    144    
256    16     
96     -64    
-752   -48    
256    272    
512    48     
-304   -16    
-176   -16    
-32    128    
128    144    
-48    128    
336    176    
-448   -16    
-16    128    
400    -144   
-448   144    
80     -176   
-144   128    
-464   -48    
-352   192    
576    128    
-368   32     
-48    32     
32     112    
-192   384    
-128   1808   
1296   192    
-448   176    
-256   -608   
384    48     
-528   176    
144    240    
272    32     
-64    -48    
-400   32     
272    144    
80     -16    
0      112    
224    96     
-256   128    
128    176    
32     64     
-96    -48    
-80    192    
-144   32     
64     64     
-176   16     
768    -336   
-1264  96     
528    -656   
256    -144   
-128   272    
-160   -160   
464    -48    
144    256    
16     -48    
-80    144    
-224   96     
128    96     
160    -48    
-80    -48    
-256   48     
-16    -80    
432    48     
128    208    
0      0      
80     64     
336    544    
-448   -96    
64     64     
368    192    
-160   -32    
-448   224    
96     0      
128    -112   
224    80     
-144   16     
-112   144    
48     192    
-64    112    
64     16     
-80    -128   
320    16     
-64    64     
-176   112    
608    256    
-368   128    
-32    32     
32     160    
0      -80    
-80    112    
-96    -144   
208    176    
368    128    
-144   64     
-336   -80    
-144   192    
-864   1264   
272    544    
-288   96     
-1120  -176   
752    32     
496    48     
-1072  832    
368    160    
-720   448    
544    -160   
416    64     
-608   80     
-48    -48    
80     240    
432    64     
-240   192    
0      416    
-208   288    
-464   -128   
784    224    
80     656    
-176   464    
80     -176   
-288   624    
256    848    
240    128    
-272   -704   
80     -480   
-32    16     
-32    -32    
112    272    
32     16     
-192   48     
96     512    
96     240    
-64    -80    
-16    384    
32     464    
-16    608    
-160   48     
304    -448   
80     112    
-304   304    
-96    0      
-16    608    
304    512    
32     0      
-368   304    
320    192    
-128   176    
368    -176   
-80    592    
-608   -448   
704    -176   
-176   48     
208    -832   
-160   144    
0      -624   
128    -336   
256    784    
96     624    
-176   384    
160    240    
112    -80    
-160   48     
-192   32     
160    0      
208    160    
-96    -16    
-96    576    
112    96     
-16    -112   
176    32     
-48    128    
48     0      
0      80     
208    96     
-144   192    
288    -64    
-288   352    
80     144    
480    48     
-288   0      
288    -1008  
208    448    
144    -160   
-256   176    
-240   -1168  
448    -240   
128    144    
112    144    
-80    -896   
-96    96     
352    176    
224    240    
0      -160   
-160   -192   
-208   -128   
288    -192   
-112   -16    
272    -560   
-48    512    
-352   -1040  
960    -784   
64     304    
0      1008   
-80    336    
-192   -192   
16     -144   
64     48     
368    1296   
-496   528    
-208   128    
464    -208   
448    -688   
-240   -16    
-128   656    
-16    -384   
240    224    
416    -16    
-384   784    
-240   -224   
-176   448    
624    -704   
32     224    
-496   -128   
64     -96    
208    224    
256    -656   
-32    336    
-144   -992   
0      -320   
16     -496   
-1296  864    
2464   -240   
-576   160    
512    -320   
-1440  1120   
1632   -32    
-720   640    
208    592    
256    -64    
-672   64     
352    -160   
272    176    
64     -128   
-272   208    
192    -32    
-32    192    
16     48     
48     352    
-48    96     
0      80     
-48    16     
-432   192    
1520   -784   
-528   -176   
-560   -1008  
480    192    
144    -32    
-432   -64    
224    144    
-400   0      
144    0      
128    0      
-32    -768   
-64    208    
-16    -768   
-192   64     
-448   -32    
128    -592   
128    -304   
-160   -1168  
512    -176   
208    -480   
-496   -480   
-16    0      
-176   16     
16     -832   
-32    -256   
176    -96    
-128   96     
-688   -112   
96     -112   
-288   -112   
320    -144   
-80    -112   
256    -256   
-208   16     
-160   -16    
-32    -304   
112    -880   
224    -80    
-416   -384   
224    80     
496    -64    
0      32     
-128   -176   
64     -240   
-208   -512   
-608   -112   
704    112    
-656   -96    
1280   1200   
-176   2544   
-496   624    
736    -1712  
688    -80    
-768   -48    
-352   224    
672    0      
48     128    
-64    -144   
-240   -32    
-176   208    
-112   16     
-480   64     
272    -144   
-384   0      
-176   -272   
32     64     
368    -544   
-80    160    
688    -288   
-1616  -304   
1072   -48    
0      -112   
-240   -128   
288    -32    
80     16     
-144   -48    
-320   -240   
608    -128   
-816   -96    
432    -144   
64     48     
400    -192   
-224   16     
-288   -640   
640    48     
-208   160    
112    -64    
112    -48    
64     16     
80     48     
16     -64    
-64    0      
208    80     
-112   16     
-320   -64    
-480   -112   
320    -432   
-96    144    
224    -544   
-80    192    
-16    112    
-96    -304   
384    -80    
368    -16    
-432   -64    
288    -80    
224    16     
-160   240    
-480   384    
464    176    
0      0      
-64    -160   
192    320    
-304   -352   
96     -80    
400    -96    
-64    480    
-592   272    
400    -176   
240    432    
208    288    
-592   -144   
96     -32    
-128   128    
224    -256   
48     32     
80     32     
-480   224    
368    -448   
96     64     
-320   224    
-304   -416   
1040   -1024  
-736   720    
1360   -16    
-1072  -192   
-368   144    
320    -176   
-432   32     
368    -352   
-752   208    
352    -160   
128    80     
-592   -256   
-400   112    
-768   64     
1136   -112   
-592   272    
-192   96     
-48    -400   
64     -176   
144    16     
320    -1120  
-1504  496    
1424   240    
-992   224    
-176   -144   
0      -64    
-560   -336   
-368   144    
-80    208    
672    -112   
-400   128    
-384   -112   
-208   80     
448    -32    
208    96     
-160   128    
-112   64     
16     -160   
-160   128    
336    -112   
-432   192    
0      128    
-144   48     
176    80     
-128   -96    
-112   80     
-208   32     
-48    80     
-288   80     
-400   144    
928    -992   
-2768  16     
1936   -32    
-176   -80    
-1216  80     
1184   -48    
-288   464    
112    -16    
48     224    
-336   -144   
240    192    
-112   -32    
496    208    
-864   -256   
-32    64     
32     -224   
80     176    
0      -16    
-208   48     
-16    -80    
-64    80     
-304   -512   
960    128    
-1152  0      
592    -304   
784    -208   
-560   -176   
384    400    
192    80     
80     -256   
336    -128   
-256   304    
48     0      
272    -16    
128    -160   
-288   48     
-336   128    
352    -32    
-240   80     
0      16     
-128   -144   
144    -240   
112    48     
336    512    
-304   -112   
256    256    
-384   144    
-592   -992   
368    176    
-192   272    
-448   -112   
192    176    
128    128    
-192   -16    
-144   0      
-80    176    
160    224    
-224   -64    
-208   176    
240    16     
-32    -176   
-432   288    
-1024  -128   
112    112    
400    352    
-176   128    
128    112    
-336   256    
-144   112    
240    160    
-64    224    
-16    64     
352    -1056  
-2272  -560   
352    -144   
720    -432   
-304   432    
-96    -720   
-816   -576   
480    48     
-160   -112   
128    0      
-16    -32    
-240   -96    
128    -128   
96     128    
-304   -128   
32     -64    
64     -64    
32     304    
-64    0      
32     544    
-272   512    
16     272    
176    -304   
-112   -192   
128    -208   
-304   128    
96     704    
0      352    
-48    -960   
-304   -368   
-16    672    
-128   512    
144    -80    
64     80     
-192   464    
112    608    
288    432    
-80    -160   
0      48     
-320   176    
144    192    
144    112    
192    160    
-384   -208   
-176   16     
144    -64    
32     128    
96     -48    
-256   512    
-192   320    
448    96     
32     -48    
-560   848    
896    672    
-464   464    
32     400    
32     352    
16     -336   
144    128    
-16    656    
64     -128   
-48    144    
0      64     
-256   -48    
144    -16    
128    208    
32     -288   
-80    -192   
-48    816    
-64    432    
-112   -528   
-16    16     
-128   32     
16     208    
272    32     
-336   96     
-64    -80    
32     144    
128    -416   
-208   32     
64     144    
272    64     
736    512    
-1232  752    
528    -688   
-48    -592   
656    -624   
-16    224    
288    832    
-656   -32    
288    208    
256    -96    
96     -240   
-112   368    
16     -80    
656    112    
-128   -320   
-112   336    
-304   432    
288    32     
448    224    
-208   224    
-672   -576   
1312   -352   
-864   704    
912    144    
-656   -384   
288    -544   
272    -96    
128    -96    
-320   128    
176    448    
16     48     
272    32     
96     -128   
-176   128    
112    304    
48     192    
-144   160    
-48    -48    
-16    48     
-96    -160   
0      -800   
288    -80    
112    -256   
-320   32     
208    16     
-400   48     
496    96     
-80    176    
-192   -48    
-144   272    
368    -896   
-1056  -960   
192    32     
1344   -208   
-1856  -208   
1056   96     
496    784    
-480   -224   
320    304    
-80    128    
96     -48    
144    144    
32     112    
112    112    
-224   64     
224    144    
128    144    
-288   0      
160    256    
176    64     
48     -128   
-32    64     
288    -576   
-1232  464    
1040   -16    
-368   -128   
288    64     
16     64     
-208   112    
96     272    
176    -112   
-224   80     
-32    128    
16     64     
-64    64     
192    -48    
-224   -128   
96     -304   
-16    80     
-368   -560   
240    64     
-272   208    
-192   -32    
224    176    
-384   192    
80     96     
-368   256    
48     96     
208    64     
128    -80    
-240   96     
-400   144    
-304   -64    
512    144    
384    128    
-176   192    
-496   48     
448    16     
592    -80    
304    256    
-224   288    
-144   288    
544    176    
336    32     
-256   176    
-224   -128   
272    160    
720    -368   
-880   160    
128    -864   
160    128    
-272   -576   
1120   464    
704    -272   
-448   960    
480    -192   
-512   -224   
448    576    
336    32     
-240   64     
96     -48    
-160   48     
-160   -144   
208    192    
400    -176   
48     0      
-64    -48    
-80    160    
192    128    
64     96     
-80    64     
208    176    
-32    384    
-48    336    
848    16     
-560   0      
-576   -16    
352    -32    
672    192    
-352   64     
528    96     
-880   -48    
640    144    
144    96     
0      176    
96     -32    
-672   -240   
416    144    
304    -176   
192    -192   
0      -368   
-352   -16    
-432   -176   
480    32     
240    -16    
-96    112    
-176   112    
80     -544   
-16    -32    
384    -720   
-32    16     
-992   -272   
-32    -336   
-48    -96    
80     -112   
544    -384   
-1104  176    
368    -272   
-128   304    
592    96     
-288   -880   
96     -304   
224    -80    
-32    288    
384    -80    
-160   0      
-944   16     
224    -288   
-64    -112   
128    -304   
-240   -128   
176    -96    
-112   48     
112    144    
48     -80    
-224   160    
256    112    
160    0      
-48    112    
-224   -112   
144    -384   
16     80     
0      16     
-80    -48    
0      -80    
-416   1552   
1968   -768   
-2192  -80    
928    -2304  
-32    256    
176    -128   
-160   -288   
-176   256    
-64    80     
-64    -80    
400    -48    
-736   64     
368    -144   
-240   -48    
816    -192   
-608   48     
816    -592   
-144   -256   
0      -256   
-48    288    
-192   224    
64     976    
1200   -144   
-1728  -80    
1056   304    
-592   192    
-384   80     
928    32     
-496   -48    
-400   -192   
-368   192    
736    128    
-144   64     
-48    -48    
224    0      
-32    -2416  
240    144    
-224   0      
-48    -192   
0      64     
96     -160   
-192   -48    
32     -16    
-368   -80    
0      -80    
-560   -48    
128    -48    
80     -16    
-112   -368   
64     192    
336    -480   
-1216  1824   
2880   -304   
-752   352    
-880   128    
1104   176    
192    16     
-384   -112   
-352   80     
112    16     
-96    384    
-160   -128   
224    80     
48     -208   
48     -176   
-192   0      
176    160    
-128   64     
16     -160   
-32    -16    
-128   -16    
-64    64     
624    -64    
-1680  864    
1200   48     
-736   96     
-352   -672   
352    -336   
288    304    
-96    704    
-144   48     
288    96     
-592   -96    
-112   -240   
-48    64     
64     32     
-128   -32    
48     16     
-112   -336   
528    -512   
16     112    
-160   0      
192    208    
-48    -128   
272    464    
-1152  48     
-144   384    
464    592    
-896   544    
240    -176   
-176   -32    
-32    -192   
-208   -208   
400    -128   
-224   -272   
272    208    
-32    -208   
144    208    
-304   -48    
272    -208   
-1216  -128   
-160   -16    
96     -176   
-176   176    
96     48     
-576   0      
208    80     
-48    -256   
0      -176   
-288   0      
-320   304    
-160   -272   
336    128    
-224   -1920  
-1488  -240   
32     -112   
-80    320    
752    -720   
-432   -608   
-800   0      
-128   1008   
784    -704   
-800   -352   
-176   80     
-272   64     
96     400    
128    -496   
64     464    
32     -48    
-208   -64    
528    -32    
96     0      
-272   192    
-80    112    
64     64     
-64    -96    
16     48     
-176   -272   
-256   0      
192    208    
112    544    
-272   320    
-80    368    
64     176    
-64    -96    
-96    176    
-192   160    
96     144    
-96    16     
-48    -16    
432    -224   
-512   -912   
-656   752    
144    624    
-320   -464   
112    416    
-208   -272   
-96    -784   
-512   -224   
288    -176   
-176   -288   
400    432    
-288   352    
352    -32    
-80    512    
-720   912    
1312   304    
-688   640    
-128   1008   
-208   720    
-64    -336   
384    32     
32     288    
16     -368   
-416   -192   
224    256    
128    -16    
-16    240    
112    64     
-128   -144   
-256   -192   
32     384    
144    -176   
32     240    
-240   144    
0      64     
144    -112   
32     -224   
-416   -288   
80     -208   
16     208    
32     0      
144    48     
112    160    
144    0      
-560   -1520  
80     48     
-544   -192   
528    -400   
112    496    
192    464    
-1296  128    
80     -64    
240    -64    
-32    640    
32     176    
-320   48     
-96    48     
560    64     
-464   224    
16     -128   
-320   -160   
96     -224   
-80    16     
48     0      
96     160    
-768   -768   
752    -544   
-560   208    
240    -144   
768    672    
-624   496    
304    464    
-624   240    
96     256    
0      -176   
64     128    
-160   -112   
80     32     
-160   112    
272    16     
80     96     
-32    192    
48     112    
16     112    
160    176    
-32    -16    
-96    192    
80     -16    
-224   0      
-112   0      
304    96     
-208   128    
128    144    
-272   80     
-560   -80    
544    0      
736    128    
-752   144    
0      -96    
368    -128   
144    128    
-320   -144   
240    32     
-128   -336   
-192   224    
-144   -16    
160    144    
96     -64    
-208   112    
272    0      
-176   192    
32     -32    
224    160    
176    0      
-64    -16    
80     64     
368    912    
-1072  176    
496    -48    
32     176    
32     112    
-384   64     
240    16     
128    64     
-192   -16    
272    96     
-288   48     
-128   48     
0      96     
112    -16    
96     80     
-48    128    
0      80     
32     160    
32     -352   
64     144    
-384   0      
-96    416    
-112   32     
272    48     
736    304    
-272   544    
-144   496    
736    464    
256    176    
-112   224    
-192   16     
160    16     
464    -64    
0      -240   
-144   32     
-384   -128   
192    -752   
320    0      
304    384    
-416   176    
-528   208    
336    192    
-80    -16    
48     -80    
0      112    
240    208    
-528   64     
-16    176    
416    80     
-288   192    
-416   2032   
1504   112    
-288   384    
640    336    
-848   -80    
944    192    
-96    64     
0      128    
288    16     
-176   0      
256    -16    
-512   -16    
256    112    
224    96     
-336   96     
128    176    
-64    -416   
-32    112    
-96    -448   
480    592    
-80    560    
-128   480    
416    -16    
-496   112    
-336   48     
288    80     
-192   -128   
128    0      
-112   0      
144    208    
-208   176    
-160   -160   
352    160    
-32    -528   
-48    96     
96     -32    
-256   32     
64     -48    
-112   160    
32     -80    
224    160    
-48    -16    
48     96     
144    80     
-288   32     
304    112    
64     112    
-112   16     
-192   -624   
208    0      
144    -384   
-512   -112   
-32    128    
128    432    
752    160    
-768   176    
272    176    
-240   112    
48     -608   
-208   -528   
32     96     
-288   -48    
256    144    
352    -496   
-224   160    
-160   -1280  
176    64     
128    0      
-64    208    
272    -64    
160    304    
-272   320    
304    576    
96     304    
-80    0      
192    208    
-96    64     
32     352    
-208   -304   
192    0      
96     -240   
-144   48     
64     176    
192    2016   
608    -352   
-1056  208    
-240   224    
16     64     
592    128    
-160   -80    
-48    -368   
-128   -144   
-16    240    
256    -160   
-96    96     
0      -416   
496    384    
-688   304    
-16    64     
544    -208   
-192   80     
-320   -320   
-272   -560   
880    640    
-192   -800   
-432   384    
1040   368    
-800   -288   
560    -272   
304    576    
-272   64     
96     16     
208    208    
-16    416    
96     -176   
96     -3024  
-208   -176   
-176   32     
-80    -416   
-128   16     
576    -480   
-192   -112   
16     304    
-112   -224   
272    128    
48     -80    
-64    -448   
-64    16     
32     -128   
112    288    
272    -576   
-304   -128   
336    -416   
-800   -1088  
960    -528   
144    464    
-768   -416   
736    -192   
-320   256    
112    -848   
496    -80    
-288   208    
-208   128    
32     -80    
160    -32    
64     -32    
-64    -288   
-1136  -112   
64     -464   
-48    -176   
160    -320   
16     -480   
-128   -720   
32     240    
112    -128   
592    592    
672    -368   
-864   -208   
80     112    
-32    640    
128    400    
-48    80     
-240   688    
-240   592    
-416   -176   
704    -576   
0      -304   
-128   -304   
48     0      
320    -816   
96     64     
-96    -80    
-32    32     
160    16     
16     -64    
0      -16    
-224   -96    
-144   80     
96     80     
560    -288   
-544   160    
784    704    
208    -496   
-576   -32    
320    -912   
-224   -48    
160    -128   
624    -192   
-512   240    
352    128    
64     -48    
-240   -528   
768    -496   
-320   -32    
32     80     
-368   -528   
96     -96    
128    -320   
448    64     
-64    -352   
384    -208   
-384   -2656  
272    736    
128    16     
32     16     
-720   -1248  
1232   -1120  
832    112    
-736   -48    
-592   -16    
-32    -16    
272    -640   
224    -336   
-144   192    
-576   -352   
32     96     
416    -832   
80     240    
-272   208    
64     -672   
64     176    
208    -48    
32     -224   
-80    288    
48     432    
-48    608    
112    -144   
32     -384   
592    208    
-752   -720   
256    -1104  
96     -336   
-480   -224   
464    336    
-96    352    
-128   -624   
-336   -112   
192    656    
144    -48    
208    -32    
288    352    
-304   64     
128    -80    
0      64     
416    -528   
-96    -272   
-192   -800   
-160   176    
80     -16    
352    128    
272    368    
-832   -224   
-80    -352   
144    -432   
288    128    
128    176    
-1040  128    
448    512    
-336   608    
448    -832   
-496   -480   
-1456  -1360  
-320   -976   
0      -416   
-16    -48    
-480   -16    
112    -656   
384    -304   
-64    -384   
-320   80     
-128   112    
384    224    
-128   -16    
96     48     
-48    -80    
-208   336    
400    -48    
-432   -96    
-160   32     
112    336    
-48    -128   
-624   -112   
-368   -848   
-224   -768   
448    -64    
-512   -96    
128    192    
400    1200   
-656   -448   
288    -544   
400    -16    
32     -240   
-464   304    
112    -128   
96     96     
224    -112   
-448   64     
-48    16     
-128   -80    
80     192    
-352   -80    
224    96     
-160   48     
304    -64    
0      0      
-64    128    
-144   -176   
48     -32    
-80    -48    
784    -688   
-1680  320    
1696   176    
320    0      
-1280  112    
112    80     
64     -176   
672    -272   
-192   64     
-160   112    
-256   48     
160    80     
96     0      
0      -16    
-112   -16    
128    32     
-368   32     
384    96     
-80    80     
-544   -112   
-256   64     
-480   16     
-48    48     
64     -96    
-16    64     
-144   16     
256    80     
-16    48     
-112   208    
-240   -784   
-640   -432   
400    128    
-720   16     
256    128    
400    -48    
-432   240    
-176   128    
96     224    
32     -112   
240    144    
-160   80     
-352   64     
-64    -48    
160    240    
480    80     
-528   80     
160    48     
-384   -80    
304    64     
32     112    
-160   240    
-816   -432   
816    -288   
-288   -544   
-768   -80    
656    112    
-416   224    
512    128    
-96    176    
-176   -48    
-128   -128   
-32    16     
0      -64    
-16    80     
-32    0      
-192   176    
-320   -224   
-80    48     
-688   -224   
-272   192    
-320   0      
16     0      
336    336    
240    64     
-112   -16    
-192   0      
64     0      
-48    -176   
0      160    
-464   48     
304    128    
144    0      
128    32     
80     224    
-64    160    
176    80     
-48    48     
496    -240   
-32    112    
80     0      
160    336    
-96    64     
144    -16    
224    128    
32     -64    
-304   16     
320    -160   
-224   64     
32     80     
-96    32     
-320   -432   
1440   -2704  
-2560  -976   
2016   576    
-640   -192   
112    112    
-304   -96    
-352   0      
208    176    
80     -208   
-448   64     
336    16     
-384   -16    
432    96     
-32    0      
-160   80     
-16    96     
-48    112    
32     16     
-160   -32    
-144   -368   
0      -16    
-256   -48    
128    32     
384    16     
464    144    
-496   80     
32     272    
80     -96    
-320   -64    
384    -32    
-352   144    
32     128    
96     -16    
240    48     
208    -16    
-640   112    
656    160    
-16    128    
-48    -16    
160    224    
-272   96     
256    160    
128    160    
128    272    
128    400    
-256   128    
-208   -672   
-288   -352   
352    16     
-400   -112   
80     -48    
16     -96    
-224   -16    
208    -336   
-80    -720   
368    -128   
-32    -176   
-96    -640   
-480   -496   
-176   -272   
640    -192   
-80    -112   
-304   -16    
-96    -48    
16     -80    
0      368    
256    480    
-432   240    
-64    -160   
672    128    
128    208    
-320   -128   
-64    272    
352    112    
352    112    
16     144    
-112   80     
-240   112    
160    16     
-32    -592   
-112   320    
64     224    
-64    144    
720    896    
128    -144   
-448   -1152  
-480   -416   
336    128    
736    672    
-384   752    
-32    0      
-80    288    
96     128    
240    -64    
-64    240    
-112   208    
32     32     
336    160    
256    0      
-224   -608   
304    -192   
-64    -1696  
96     320    
736    784    
-1312  176    
128    -304   
880    240    
-368   -128   
-192   608    
-112   720    
-32    -624   
144    -528   
240    96     
32     448    
64     128    
-80    -224   
128    -432   
272    -304   
-464   -416   
32     304    
672    528    
-176   -720   
-256   -64    
-48    464    
160    224    
336    0      
-288   -336   
-288   -224   
-16    256    
368    304    
-16    256    
-192   -272   
96     112    
-368   -2944  
1040   -976   
-400   -208   
528    -784   
-16    -704   
-368   -352   
-272   -416   
272    928    
384    1280   
-80    -1072  
-112   880    
192    -240   
32     112    
128    -304   
80     144    
-80    -64    
-128   400    
128    176    
256    528    
-176   -624   
-128   -48    
160    528    
-96    896    
1648   -192   
-1136  224    
944    -16    
-608   320    
208    368    
-240   192    
528    1248   
96     1024   
-112   688    
464    672    
256    448    
-384   320    
-176   80     
16     -80    
32     -64    
224    400    
-448   -208   
-96    112    
176    -320   
112    256    
0      -256   
128    304    
-272   -1184  
48     -400   
-176   -960   
-320   -208   
240    384    
-816   368    
144    48     
224    -480   
32     64     
-32    -160   
240    144    
-64    144    
-480   -96    
240    -128   
-48    992    
384    -768   
-368   -160   
64     240    
-112   0      
-16    -128   
576    -2864  
-48    -112   
192    144    
-176   -1264  
96     16     
224    176    
256    16     
-304   -720   
752    -1536  
512    352    
496    -400   
-1232  -896   
304    608    
400    -1568  
-336   32     
64     -240   
-256   320    
336    0      
128    64     
-112   -224   
-80    -1808  
0      -320   
112    240    
240    -48    
-224   32     
16     -272   
368    -1200  
-368   -288   
240    -288   
-192   224    
16     112    
496    80     
-640   -288   
416    240    
-320   -144   
192    -192   
-48    -336   
272    -880   
-544   -784   
272    -192   
-64    80     
208    -368   
-464   144    
16     -144   
-240   240    
576    -80    
-208   -192   
-800   -224   
32     -336   
-64    -320   
336    -448   
-16    -272   
-128   -656   
-80    16     
240    -1792  
384    144    
-112   -128   
176    160    
16     -48    
-16    -432   
528    -656   
-80    80     
-640   -160   
96     -112   
16     160    
80     496    
144    256    
-144   0      
128    -64    
32     -1056  
-96    160    
-144   128    
-32    160    
416    -80    
112    96     
-416   -32    
48     160    
448    -64    
-592   288    
-240   32     
160    -128   
32     -96    
-144   -176   
128    160    
-208   352    
464    -16    
-144   -576   
-80    192    
192    -144   
-480   -896   
1744   384    
-816   128    
-256   -112   
-64    0      
-384   -16    
32     -272   
-80    0      
144    -96    
-416   80     
208    -192   
32     192    
-32    -2320  
-144   128    
96     144    
64     16     
-544   96     
736    -160   
-800   -112   
-176   -176   
240    -64    
400    880    
336    -352   
-1856  -48    
2096   -656   
-592   -176   
112    128    
-624   -112   
336    128    
144    -160   
192    80     
-384   -16    
-400   48     
112    -112   
288    160    
-128   -80    
-336   224    
144    144    
-80    -128   
272    176    
-144   -128   
-112   128    
192    0      
80     32     
-80    16     
-144   -96    
-448   112    
672    64     
-560   64     
288    -32    
-304   48     
1072   -1152  
-1968  -272   
624    -432   
-352   176    
-160   0      
560    176    
-800   -128   
-1072  64     
272    48     
-608   -128   
16     80     
-272   32     
16     -32    
32     -80    
-160   32     
288    -144   
-384   176    
-240   -112   
304    16     
-448   -208   
96     112    
-48    224    
-944   -560   
240    -160   
112    -128   
-640   -240   
-64    144    
240    96     
16     -80    
-720   160    
-64    -288   
272    112    
-48    48     
16     16     
-32    -128   
-96    -48    
-144   32     
176    96     
-240   -112   
32     -80    
-48    -80    
-704   16     
0      -64    
-400   -416   
-480   80     
384    0      
-240   80     
16     0      
176    304    
-1264  -656   
32     -256   
-16    240    
176    80     
-48    32     
-288   -16    
144    128    
112    -192   
192    160    
-432   -160   
-288   64     
-32    -368   
-480   224    
-32    -352   
-16    80     
272    80     
48     64     
-208   112    
-112   -128   
-96    32     
-16    80     
-224   96     
272    208    
1264   1744   
-2560  592    
1840   128    
240    -304   
-576   192    
-128   -112   
-400   0      
400    48     
144    -16    
-208   -32    
-144   32     
-432   0      
320    48     
400    48     
-320   -48    
48     304    
-688   -64    
144    224    
-112   -144   
-272   -672   
-368   -656   
-80    -80    
416    176    
-608   0      
384    -16    
16     16     
-496   -64    
96     -128   
-208   -160   
-128   -80    
224    -16    
-496   48     
144    192    
96     -64    
128    112    
160    -160   
-400   -128   
160    -368   
352    -32    
-160   352    
-160   336    
336    416    
-160   0      
-32    -208   
80     -160   
-80    96     
-224   -256   
-144   -320   
-16    240    
272    80     
-192   -112   
192    -128   
-224   272    
-208   288    
-192   -48    
496    16     
-624   -128   
160    -720   
-96    -1056  
112    720    
128    560    
-192   -80    
96     160    
-240   -144   
128    112    
208    96     
-432   -384   
128    48     
192    -160   
-240   -112   
-96    -96    
32     208    
160    -32    
48     160    
-208   -48    
128    80     
-432   -272   
224    224    
64     64     
-32    176    
-320   160    
-64    64     
320    -16    
-144   -640   
224    -224   
-592   432    
272    -48    
144    -80    
144    -48    
-544   64     
-112   512    
128    128    
128    -32    
-112   -128   
-288   128    
80     96     
176    -32    
-32    -16    
-80    16     
160    64     
96     -160   
0      -112   
160    -240   
432    -368   
-1264  80     
960    64     
-592   352    
288    80     
96     32     
48     -464   
80     -144   
-80    -160   
112    240    
240    160    
-32    -112   
96     240    
-320   112    
16     96     
304    -208   
-32    80     
0      224    
-384   -560   
-160   -624   
128    16     
288    -16    
128    384    
-160   304    
-176   -192   
112    -208   
192    -112   
-128   80     
-48    -16    
112    0      
-112   288    
1408   -240   
-2288  720    
1264   -304   
-96    -464   
-752   0      
-64    -80    
224    880    
304    -272   
-32    64     
48     80     
-128   400    
16     -176   
-64    400    
96     -128   
16     128    
-144   -16    
304    176    
-320   528    
80     -320   
64     368    
528    1248   
-960   -448   
-592   96     
1056   0      
-784   -336   
544    -416   
-304   -1008  
752    -928   
-768   -768   
304    -592   
0      -704   
-368   112    
64     0      
480    -304   
-128   -32    
96     32     
-160   16     
-352   208    
496    -128   
48     144    
-96    -64    
-80    0      
368    -96    
192    32     
-448   384    
160    -224   
-112   496    
560    32     
-400   -272   
256    -128   
-192   -1168  
-64    160    
-64    160    
160    80     
160    -16    
48     192    
48     -32    
224    192    
96     48     
0      64     
-144   112    
96     -96    
-208   64     
208    -128   
96     80     
64     -752   
352    112    
0      160    
320    80     
-32    240    
-432   544    
-672   48     
-208   528    
-528   -176   
224    64     
1072   -32    
-768   -272   
48     368    
-496   -144   
880    272    
-112   -416   
80     192    
-48    -96    
-240   96     
176    112    
352    288    
-384   128    
-16    240    
240    96     
-208   -368   
480    -896   
-160   288    
64     240    
128    288    
-496   48     
304    -176   
448    112    
-144   -1424  
208    112    
-256   128    
464    96     
-512   48     
336    240    
16     -48    
-288   -16    
416    -160   
-416   -144   
672    -32    
-352   -64    
144    160    
96     -320   
272    192    
-80    -160   
-144   128    
-272   -160   
224    -112   
48     -272   
16     -144   
48     -48    
-48    16     
240    -208   
-272   -736   
-64    48     
352    432    
-336   352    
288    -112   
48     336    
32     -1552  
-320   144    
240    -32    
-32    112    
224    64     
160    160    
-64    -48    
-176   -464   
128    48     
32     -336   
64     32     
112    -16    
-48    80     
-96    64     
176    528    
400    -128   
-464   -112   
0      -80    
64     16     
48     96     
160    -432   
-96    -1152  
144    -432   
-80    -1776  
176    0      
0      144    
1008   -64    
-2640  976    
1344   -192   
176    176    
-112   -320   
-80    -800   
-80    144    
112    -128   
80     16     
256    -128   
-560   -64    
304    -80    
352    48     
-128   -112   
-432   -176   
864    -112   
-240   -16    
-176   128    
256    -880   
-112   -64    
80     -288   
-832   -48    
752    -704   
-48    -144   
-1344  -128   
864    -208   
128    112    
96     96     
-288   -112   
128    32     
-176   -112   
128    -112   
32     32     
-224   -128   
16     -32    
192    -128   
368    320    
-320   0      
96     32     
208    -96    
-192   160    
-208   -80    
-160   -304   
32     -208   
-16    -160   
496    128    
-320   -544   
16     16     
96     -3520  
-32    48     
-80    144    
-1504  208    
2864   544    
-1200  160    
-1088  -288   
640    32     
-128   0      
288    -144   
-80    -496   
-144   -432   
-336   32     
384    -224   
32     112    
-176   -976   
-208   -64    
400    128    
272    80     
-240   64     
208    -144   
-192   -112   
0      -336   
240    96     
-160   -144   
208    256    
768    -144   
-608   176    
448    -208   
-240   144    
112    -128   
80     96     
96     -32    
320    32     
-416   -48    
224    -240   
16     -64    
-16    -96    
-272   -128   
144    32     
-368   0      
32     -144   
32     48     
160    -176   
-16    16     
144    -416   
-176   48     
928    -160   
-512   96     
-528   160    
624    0      
-48    160    
-320   32     
256    -64    
-224   48     
176    -128   
64     -160   
-80    16     
16     -48    
160    160    
336    -400   
-80    144    
-128   -464   
64     48     
352    80     
-416   96     
-272   -272   
-112   -16    
288    32     
-240   -144   
192    -224   
-96    32     
192    64     
-368   -192   
560    832    
-656   -880   
-448   656    
-512   -32    
-16    -112   
1296   208    
-704   48     
-304   608    
-560   48     
704    32     
400    -192   
-336   112    
-352   -96    
-112   144    
848    -384   
-256   80     
-928   -256   
-192   96     
256    176    
-288   -48    
-272   -32    
-576   592    
16     384    
336    416    
-272   -64    
176    -160   
-240   96     
-144   -448   
-32    -640   
-512   -96    
-176   480    
240    -384   
-416   -96    
48     128    
-432   -240   
112    -208   
0      -224   
-240   80     
-976   -112   
576    400    
128    384    
32     -112   
96     -80    
-416   -160   
160    -64    
368    -544   
-224   32     
-80    176    
-256   -96    
304    400    
-16    288    
-192   -192   
32     128    
496    640    
-848   656    
160    480    
576    816    
-256   800    
224    -256   
-288   -528   
240    624    
112    -16    
-128   -208   
-64    80     
80     -96    
-256   -176   
384    -288   
272    208    
-368   112    
32     -48    
-320   240    
-32    176    
96     208    
32     -64    
-240   -64    
96     96     
112    64     
64     160    
-96    48     
-368   -336   
-176   -272   
-16    64     
-64    128    
-384   -336   
864    -688   
224    624    
48     -240   
-160   -144   
-320   16     
-80    592    
0      944    
336    48     
16     -64    
-368   48     
-32    80     
-16    112    
272    -176   
-256   144    
48     0      
-336   -32    
-480   -384   
240    64     
-576   -80    
160    112    
-112   -688   
-528   -96    
80     112    
-192   -240   
560    -208   
-368   0      
-96    -128   
144    64     
240    64     
-288   160    
32     80     
112    -176   
-160   48     
-112   16     
48     16     
48     176    
-240   32     
224    80     
-176   784    
-240   -528   
320    -176   
-128   432    
-320   112    
128    80     
80     192    
160    -32    
-48    -48    
-368   320    
0      -48    
128    96     
1008   1472   
-656   736    
-912   272    
1296   -112   
80     800    
-880   912    
128    -256   
0      640    
304    -64    
-272   -336   
-16    -656   
-304   -32    
96     48     
192    -144   
-544   -48    
80     128    
64     16     
96     -16    
-272   -48    
80     -240   
32     128    
-272   208    
832    -688   
-1232  544    
1552   512    
-1792  2032   
112    -128   
160    16     
-384   -112   
-208   -80    
-96    80     
112    48     
80     160    
48     16     
-320   224    
224    -80    
176    96     
-224   176    
-64    16     
-224   -160   
64     128    
-32    -176   
112    176    
160    -256   
-160   288    
224    -80    
-224   32     
544    368    
112    208    
-1136  496    
-224   160    
352    -48    
592    -272   
64     48     
-64    128    
-32    16     
128    -144   
-464   -240   
-96    -48    
112    592    
-304   32     
192    128    
0      32     
80     160    
32     192    
-48    32     
-16    16     
192    -32    
224    80     
80     192    
-320   64     
-528   -576   
400    -2432  
-1072  -752   
-112   -208   
64     -16    
800    112    
-112   256    
-480   224    
48     176    
-208   -240   
544    -128   
192    96     
-320   -16    
-496   144    
432    80     
-48    -240   
320    128    
-640   96     
32     80     
368    96     
-208   736    
528    304    
-880   400    
32     -160   
752    -64    
448    160    
-960   32     
480    384    
-240   -32    
384    160    
-64    128    
-224   -848   
-96    32     
368    240    
-32    -32    
112    208    
400    -96    
-448   112    
608    -48    
-512   80     
496    16     
256    64     
-640   128    
272    32     
208    144    
160    128    
176    16     
-496   192    
272    144    
16     96     
-224   32     
48     96     
160    16     
-192   -304   
704    -320   
-640   176    
752    -240   
-80    64     
-496   -112   
240    -80    
-160   176    
160    -576   
80     -96    
-432   96     
-176   176    
336    32     
96     -16    
-80    0      
96     336    
-400   240    
176    288    
256    -368   
32     192    
-16    336    
48     -128   
-64    -192   
-16    -416   
80     256    
352    -448   
-304   256    
208    176    
80     -128   
-144   48     
192    816    
400    -848   
-528   816    
1696   -112   
-848   -48    
-400   272    
352    400    
672    16     
-464   -704   
-288   224    
160    -128   
16     64     
256    64     
-304   48     
-352   16     
288    208    
128    -128   
144    16     
-544   64     
16     96     
416    192    
800    -1328  
-1584  448    
832    48     
-880   256    
1104   -336   
160    96     
-80    -576   
-848   192    
336    32     
352    80     
80     112    
-192   96     
-16    0      
-256   -48    
352    128    
208    96     
-256   208    
208    -48    
-32    224    
48     -224   
128    80     
-80    32     
64     32     
-192   112    
192    -32    
-80    96     
64     16     
-128   160    
176    -272   
-256   -288   
1296   96     
-2512  128    
1552   64     
-272   352    
-192   128    
-32    128    
-224   -176   
496    176    
-336   48     
272    80     
64     0      
-64    144    
16     192    
64     -80    
-80    272    
512    -208   
-320   144    
80     -160   
-144   48     
96     -144   
320    128    
-480   -336   
736    448    
64     208    
-32    -1600  
-128   112    
-896   -336   
432    -800   
-240   96     
208    -80    
48     -64    
-48    176    
400    240    
-400   176    
192    -272   
-224   -1072  
-80    112    
304    -192   
-256   -160   
128    -272   
-64    240    
-784   -160   
208    -320   
-224   -336   
176    -848   
-336   176    
224    -176   
-96    512    
-16    -176   
-96    48     
688    0      
-736   272    
320    -64    
-112   96     
176    -48    
-160   48     
320    128    
-336   -48    
240    -352   
272    32     
32     -160   
-416   -1248  
-144   -16    
224    -496   
-80    16     
112    32     
256    16     
-512   -208   
256    -64    
-288   -80    
16     -320   
160    -64    
1424   1568   
-2288  704    
224    64     
1616   48     
-464   304    
-592   -144   
-128   -240   
1024   -688   
-144   -1328  
-112   32     
-48    -336   
-352   0      
320    -176   
256    112    
-464   -368   
80     -176   
-288   0      
-16    -208   
48     -112   
-128   -96    
160    48     
96     -304   
96     96     
-160   -1648  
0      320    
272    48     
-96    784    
80     -96    
-352   -432   
-160   -176   
96     144    
-464   336    
16     -32    
-288   -432   
80     -608   
160    80     
272    -96    
-432   192    
240    -336   
448    304    
-416   -192   
-48    96     
-80    -80    
160    -80    
-32    96     
272    -128   
-272   -176   
-128   80     
-48    -176   
112    400    
-112   -272   
80     -304   
-224   -656   
-160   -608   
16     320    
96     -16    
304    448    
-496   -512   
544    -256   
-464   624    
-176   304    
32     -80    
176    0      
48     16     
-96    48     
32     320    
176    -80    
96     32     
-16    -256   
-320   128    
-464   176    
64     -224   
-112   32     
160    -80    
-352   64     
48     -96    
-48    -352   
160    -64    
112    16     
-576   -352   
32     96     
-32    96     
160    64     
80     544    
48     144    
-48    -176   
-208   192    
480    528    
144    704    
-192   -128   
144    -1328  
16     464    
0      464    
96     -160   
0      -32    
80     96     
-768   -176   
-32    128    
-1200  -32    
16     592    
-144   -16    
-480   -384   
48     144    
-960   1088   
1680   -16    
-1200  320    
560    480    
-240   864    
-192   160    
-480   -144   
-32    256    
-800   -784   
-128   96     
704    368    
-336   48     
-448   192    
-384   -112   
128    208    
-368   -288   
-352   176    
-544   48     
-64    -304   
240    -96    
-48    208    
-448   -192   
224    64     
32     -304   
32     -144   
-336   -368   
-96    80     
16     48     
64     32     
256    272    
160    -720   
-1568  -432   
608    -240   
-304   144    
48     192    
64     -208   
-464   -80    
128    -112   
-240   -96    
368    -80    
-624   96     
144    0      
96     96     
112    208    
-160   256    
-224   16     
48     48     
-256   -128   
64     0      
-448   0      
-272   80     
0      80     
496    1088   
544    464    
-144   -16    
-544   -32    
400    -16    
240    176    
-336   144    
800    -304   
-544   176    
-320   128    
496    -112   
64     128    
-624   -48    
160    176    
-64    -112   
96     16     
0      16     
-240   160    
288    160    
16     16     
496    272    
-112   -128   
-352   400    
-144   -272   
144    -176   
288    -448   
528    -656   
800    336    
-496   528    
-768   -16    
48     160    
128    16     
112    144    
-224   176    
-96    208    
-64    272    
144    192    
64     -160   
-288   -48    
336    256    
32     -80    
-192   64     
-576   160    
288    16     
-496   256    
0      -80    
-528   176    
480    -64    
-176   0      
-272   848    
272    2672   
416    -320   
-1216  -496   
704    -176   
416    -112   
-480   -32    
-304   176    
128    160    
48     464    
-336   128    
416    -256   
-48    160    
-272   96     
48     176    
112    -96    
96     112    
144    32     
-480   112    
-192   -192   
880    -336   
-464   16     
48     128    
-224   144    
320    256    
32     128    
-192   48     
336    80     
-512   16     
288    0      
128    48     
-96    16     
-208   48     
-288   176    
160    -32    
-16    160    
416    -64    
-352   64     
-432   -80    
256    16     
-640   -16    
688    176    
-256   16     
-128   80     
-192   0      
-32    -80    
224    16     
-112   336    
384    464    
-64    304    
-416   -64    
224    -144   
-80    -96    
288    -32    
-1152  144    
624    -48    
96     -160   
-288   0      
-128   432    
272    16     
208    -32    
-304   224    
-32    112    
288    0      
-96    -128   
-96    64     
-160   -16    
48     112    
256    0      
-400   160    
48     464    
64     48     
64     -304   
-160   -48    
64     416    
-192   64     
256    -16    
32     -112   
-160   32     
-256   -128   
256    -112   
112    48     
16     112    
800    48     
-2576  432    
1744   112    
96     96     
-464   80     
96     -64    
-176   208    
96     -208   
208    -400   
112    320    
112    16     
-272   -32    
64     160    
-80    -32    
-480   496    
880    -144   
-608   16     
304    240    
128    16     
48     208    
0      176    
-1104  288    
1520   -256   
-640   48     
-800   -288   
352    176    
0      -32    
656    32     
-432   224    
176    0      
-288   144    
128    -752   
176    160    
-208   192    
320    48     
-272   32     
176    128    
-80    -96    
128    0      
-128   64     
128    176    
-160   96     
-64    112    
144    -96    
-80    -272   
-96    80     
432    -784   
-336   144    
336    0      
-240   112    
304    -400   
-752   -1632  
-592   112    
1264   -80    
-832   48     
-160   32     
704    -528   
-368   32     
-128   128    
64     176    
144    224    
240    -1008  
-144   64     
-96    144    
32     48     
208    368    
464    224    
-416   80     
144    96     
-208   0      
368    80     
-16    64     
544    1024   
-1408  736    
368    -160   
-400   -16    
304    -464   
-352   -64    
-176   -672   
336    336    
336    112    
80     272    
-720   -64    
128    48     
400    32     
288    160    
-544   144    
-240   160    
448    64     
-64    16     
256    48     
-144   -224   
-192   176    
352    -144   
0      -32    
-64    -384   
48     160    
-576   48     
304    -560   
944    32     
-144   688    
-144   112    
368    -352   
-352   336    
192    -64    
128    0      
384    -240   
32     176    
-128   -144   
384    -80    
-224   64     
-16    176    
0      64     
224    224    
-16    144    
16     -32    
-208   48     
-112   -256   
720    0      
48     -64    
240    272    
-272   368    
-144   224    
1504   1696   
-560   1120   
-448   -112   
1344   576    
-240   576    
-496   608    
688    576    
240    -640   
-176   464    
-240   304    
32     -112   
432    -208   
-160   256    
-96    -176   
-176   16     
-48    -656   
448    128    
-16    -464   
64     272    
112    432    
-32    400    
48     -464   
224    -192   
-352   256    
112    -240   
336    432    
208    1056   
208    -592   
-32    -96    
-208   800    
-112   128    
224    16     
176    -64    
-400   0      
96     -80    
208    -2512  
-64    144    
-400   -432   
176    -128   
240    368    
-64    -912   
48     -224   
-496   -352   
160    352    
16     16     
304    48     
0      528    
-240   -368   
320    -544   
16     368    
192    -144   
-240   208    
-576   -672   
464    -704   
-208   -32    
-416   -48    
416    -112   
240    -80    
192    -112   
-384   224    
-96    -400   
304    -544   
288    208    
16     -32    
-192   208    
192    -208   
48     160    
-32    -64    
160    -320   
-64    -192   
192    384    
-160   -96    
96     -448   
-144   48     
272    -576   
-272   96     
112    368    
-336   320    
-32    -112   
352    576    
48     0      
224    -480   
224    1008   
-368   192    
-288   -288   
608    -832   
-32    240    
-80    -128   
-384   656    
208    -1200  
496    64     
-272   -192   
-208   272    
64     32     
176    208    
384    -144   
-368   -288   
-144   160    
0      32     
-736   240    
64     -96    
96     -368   
-176   -16    
-688   832    
1440   -336   
-1040  112    
480    -2192  
512    272    
-400   -32    
-128   128    
224    224    
-80    -224   
224    -304   
-128   32     
-320   80     
192    32     
-192   176    
144    -176   
-64    80     
-320   -272   
496    112    
48     -736   
-80    224    
48     32     
80     32     
-96    0      
256    -64    
-112   -176   
-288   -192   
224    64     
-16    48     
-160   16     
128    32     
-976   -224   
480    192    
112    48     
-800   -304   
816    128    
128    160    
-560   -80    
288    -128   
32     -208   
-96    -112   
0      112    
32     0      
144    -32    
-32    -64    
-416   -304   
336    48     
-128   -80    
240    32     
-144   -304   
112    -64    
-432   112    
96     80     
-576   -16    
1584   -416   
-864   -64    
-96    336    
352    -64    
-128   -144   
-96    160    
208    -80    
-304   80     
400    112    
96     144    
96     -80    
-384   32     
-80    -16    
432    0      
-16    32     
176    -192   
-160   224    
-48    0      
-144   176    
528    -32    
368    -208   
-576   384    
144    48     
-304   -336   
64     320    
80     -352   
-1008  336    
-528   192    
-304   -128   
144    -176   
-128   -48    
-448   96     
-144   -80    
384    0      
128    288    
128    288    
-944   -208   
-128   -48    
96     -32    
32     112    
-288   -208   
-64    128    
128    -96    
128    224    
0      -48    
-976   -192   
-144   80     
-544   80     
-288   -912   
-1472  240    
496    -112   
-1168  -368   
896    -96    
48     0      
16     320    
-480   32     
-192   128    
352    -176   
384    -320   
-96    256    
-688   128    
32     -16    
400    96     
208    -144   
-368   -32    
-192   112    
32     64     
416    112    
-768   0      
528    480    
-592   160    
288    16     
272    128    
-384   96     
448    16     
-304   -112   
-528   -112   
176    -224   
16     32     
-928   -80    
-208   128    
224    16     
-416   48     
160    -224   
368    80     
-288   128    
320    0      
-144   112    
64     -96    
-32    80     
16     -16    
48     -112   
-144   -128   
240    224    
-112   352    
-400   352    
336    -32    
160    128    
-288   -528   
256    144    
-272   96     
384    544    
128    80     
-368   112    
544    320    
-224   160    
112    -16    
-16    -16    
-32    368    
-16    -96    
-32    64     
-1328  -16    
208    192    
-32    64     
32     -32    
16     -80    
-352   -176   
32     -16    
-64    288    
-48    624    
256    320    
-304   80     
112    -64    
-208   192    
-192   -112   
192    272    
-256   16     
-240   -64    
192    -304   
-32    -112   
128    16     
928    1008   
-1952  848    
1296   -240   
288    -16    
-672   320    
352    -176   
-368   208    
480    144    
-384   0      
144    96     
-256   16     
176    48     
128    160    
-176   -16    
-432   -48    
384    112    
-96    224    
-128   240    
272    80     
-80    -48    
-64    64     
-896   -96    
1008   -176   
-736   128    
80     -48    
-736   208    
640    -32    
-32    96     
-144   352    
-112   144    
-192   16     
304    48     
-64    64     
96     64     
-496   -128   
128    192    
272    -32    
-304   112    
-448   -80    
176    16     
240    80     
96     0      
-256   96     
-48    64     
-96    -96    
112    -32    
224    -32    
-384   -64    
240    64     
-336   -48    
560    560    
-624   -1424  
-512   -400   
480    -448   
-528   544    
256    256    
336    0      
-432   608    
-80    784    
32     384    
-256   -160   
448    224    
-160   64     
-144   304    
160    144    
96     160    
-256   32     
304    144    
-192   160    
16     272    
-48    528    
128    368    
352    -208   
-1616  544    
800    -704   
416    -736   
-304   176    
64     656    
160    368    
-448   64     
272    112    
16     80     
176    192    
-96    80     
192    32     
-272   96     
224    -48    
-256   96     
96     48     
112    -176   
-240   -160   
16     -80    
-96    -64    
192    0      
48     160    
-384   -544   
-16    -512   
-208   -128   
-32    -64    
-128   -480   
-336   -128   
208    256    
-416   16     
592    48     
416    -112   
-256   208    
-672   -144   
624    -112   
-576   16     
384    -32    
400    176    
-544   32     
432    320    
-208   96     
-32    80     
48     -80    
-144   176    
32     240    
-224   176    
16     112    
-368   -80    
288    -368   
-144   160    
752    144    
-2384  -16    
448    128    
1456   -240   
-336   -1152  
-304   -288   
-320   -1200  
432    192    
496    -960   
-400   464    
-336   272    
-144   -64    
128    432    
272    16     
-16    400    
-384   80     
64     320    
448    16     
176    -112   
-192   -176   
-64    208    
192    32     
224    -32    
-656   80     
496    -160   
-400   -32    
464    -128   
224    160    
-288   800    
176    176    
-320   -448   
16     112    
176    -80    
144    160    
-272   -16    
-240   96     
624    -80    
304    -464   
-992   -3456  
208    544    
496    -48    
112    224    
-16    224    
-144   -80    
-160   -160   
-96    -224   
336    -816   
-160   -80    
-256   -144   
-112   -320   
464    208    
-512   -80    
400    512    
880    208    
-832   320    
128    16     
608    1200   
-304   912    
48     448    
352    -448   
80     64     
-144   320    
96     16     
192    96     
-48    -112   
176    48     
32     -80    
64     64     
0      176    
160    208    
-160   -544   
176    -48    
16     176    
64     176    
0      48     
-288   208    
144    288    
176    -176   
-112   -288   
16     128    
-16    224    
-16    128    
416    1712   
640    -336   
-1248  880    
864    -400   
-160   -304   
144    -176   
192    -224   
80     304    
-320   32     
80     32     
368    -80    
-208   112    
-208   -240   
-96    256    
448    -368   
-240   -256   
-96    -592   
192    -464   
-32    -64    
400    96     
-256   -272   
496    -704   
-688   464    
1600   -144   
-832   80     
592    112    
-608   272    
80     -368   
192    112    
176    -144   
-208   48     
112    144    
128    80     
0      80     
128    -1776  
-96    0      
-128   -688   
272    32     
-112   192    
304    -352   
-400   -64    
592    -1488  
-48    -128   
-48    64     
288    -160   
-288   -16    
-192   -224   
432    -1648  
-272   128    
48     -1184  
1344   2160   
512    -464   
-1600  576    
1392   288    
-560   -400   
-528   0      
400    -336   
320    416    
64     96     
-272   -16    
512    -80    
-192   0      
16     -144   
96     64     
240    -304   
-208   64     
240    -48    
112    -240   
-160   -32    
-80    -288   
-144   16     
64     80     
-256   -336   
-592   0      
624    -624   
16     -1616  
-368   224    
512    -16    
112    -128   
-336   -112   
224    288    
-320   48     
304    -128   
112    -16    
-288   -160   
-368   96     
-192   48     
144    -352   
464    -848   
-176   -320   
272    -848   
80     128    
-32    48     
-368   -368   
32     176    
480    352    
-1008  -80    
656    -512   
-432   -336   
400    -368   
-336   96     
368    480    
-64    48     
176    -240   
0      -112   
64     -208   
208    80     
48     -880   
-80    32     
-16    48     
-224   -272   
-288   -48    
288    16     
0      32     
176    -144   
-768   112    
80     -160   
16     320    
688    -96    
-704   16     
-160   -336   
96     208    
848    -2736  
-1872  -704   
2432   464    
-1536  -608   
576    272    
832    -144   
-1040  -112   
336    -176   
-512   96     
656    -80    
-496   208    
-224   -256   
240    112    
-96    -416   
224    80     
-288   -560   
240    176    
-240   32     
464    144    
272    -240   
-1088  -352   
912    96     
-480   -160   
672    32     
144    96     
-576   -112   
352    -192   
-272   112    
384    -48    
336    176    
-208   160    
0      16     
-432   -48    
192    0      
96     16     
-240   160    
320    176    
-240   64     
192    224    
320    32     
-224   96     
160    -16    
-288   -16    
656    -80    
16     288    
-192   -256   
-144   -112   
-176   32     
288    144    
-64    240    
192    144    
-48    32     
-368   -368   
480    -256   
-112   240    
576    80     
-160   144    
128    32     
-624   304    
-160   592    
-16    -176   
-416   -160   
-288   -64    
-192   32     
-16    48     
400    -80    
-16    -128   
-32    80     
-160   112    
352    80     
16     160    
-608   -144   
32     -112   
-432   560    
528    -352   
-592   -496   
144    0      
48     64     
192    -16    
-48    480    
-384   352    
144    -64    
-224   -880   
1056   -832   
-992   576    
880    -480   
-128   -112   
-64    352    
208    96     
-176   912    
32     128    
-192   -80    
0      176    
48     112    
96     496    
-464   176    
-16    0      
-32    -112   
-16    -96    
-528   -144   
16     256    
-144   -352   
96     64     
-224   -1232  
-48    -448   
496    1040   
-656   448    
224    -592   
400    -576   
-304   256    
192    144    
320    384    
-288   -64    
-192   144    
-512   48     
176    304    
112    -368   
-96    16     
64     -48    
-320   400    
528    -32    
-176   -416   
-544   64     
320    352    
112    176    
-160   -192   
32     496    
-80    -16    
-192   0      
0      112    
96     80     
400    64     
-784   464    
864    1712   
-176   128    
-1744  -896   
1504   1056   
-128   592    
-1056  -416   
32     32     
256    -64    
-368   -768   
-128   480    
48     -112   
-336   -320   
160    176    
-144   -304   
16     32     
-48    96     
64     128    
80     144    
128    80     
160    -64    
64     112    
640    592    
-1520  608    
672    -16    
-336   176    
-304   320    
608    224    
-320   -400   
-768   -320   
208    -32    
16     656    
32     608    
16     432    
-96    -192   
16     -384   
160    176    
496    176    
-384   64     
320    528    
-160   352    
128    432    
96     32     
16     256    
-400   448    
512    -48    
416    160    
-304   352    
48     0      
-480   -1472  
-320   -592   
-32    208    
-528   128    
-48    -256   
224    -112   
-512   112    
368    48     
-1152  352    
592    -336   
-608   -256   
-32    -112   
400    320    
-368   160    
112    112    
-16    0      
96     192    
80     176    
-64    -96    
-144   48     
160    -112   
48     -224   
160    -192   
-240   -48    
-432   -1328  
-1136  -368   
464    -16    
-416   288    
512    336    
-368   224    
-464   -64    
528    880    
576    -592   
-400   -352   
-208   80     
208    352    
32     336    
-48    704    
-96    80     
-240   -224   
64     240    
176    -96    
-48    288    
224    768    
96     928    
192    96     
32     -208   
-768   -48    
240    -416   
64     -16    
-192   720    
160    160    
-128   -96    
-320   -128   
304    176    
80     272    
-128   80     
112    128    
-352   160    
-80    336    
208    -32    
-352   -272   
336    480    
176    752    
0      336    
192    272    
-112   304    
176    352    
-336   224    
336    -608   
-384   -640   
-160   80     
32     -80    
32     -240   
368    240    
-544   160    
-384   240    
1024   176    
-400   112    
-64    368    
352    416    
-160   -144   
-240   32     
304    256    
-496   32     
288    -16    
176    16     
-32    112    
-112   -48    
112    80     
64     -80    
64     -192   
-208   -416   
336    -976   
64     -304   
-32    -160   
-400   -320   
112    -96    
336    352    
-160   -16    
-160   -176   
272    32     
-96    272    
-16    208    
96     160    
-48    272    
-64    2144   
752    -48    
-912   352    
-16    0      
80     160    
480    16     
-448   -96    
80     80     
208    -688   
0      304    
240    48     
-320   160    
-176   128    
720    160    
-560   128    
-288   176    
752    16     
-576   32     
96     -240   
-16    192    
-192   -144   
1040   -832   
-880   416    
1424   -224   
-544   32     
-336   400    
496    -96    
-336   80     
192    0      
48     16     
16     80     
-240   -48    
240    32     
128    32     
-160   80     
-192   32     
368    -80    
96     16     
112    -752   
240    96     
-400   -2224  
400    96     
48     144    
16     144    
128    0      
-512   176    
624    96     
-464   192    
336    32     
-32    16     
1424   -144   
-1504  -256   
-160   -160   
576    -144   
224    192    
-208   -400   
-272   -112   
80     80     
-128   96     
176    -80    
16     64     
-144   128    
64     128    
-160   80     
16     -48    
352    176    
-64    -160   
-336   48     
224    -352   
304    176    
16     -400   
16     272    
-368   -496   
-784   480    
1408   -144   
-1136  -480   
-496   160    
912    32     
-656   -160   
272    -240   
64     256    
-160   -272   
128    176    
128    0      
64     112    
32     48     
-320   80     
64     64     
80     128    
-48    384    
32     96     
-256   32     
256    128    
-464   -240   
336    -240   
-64    176    
-560   -128   
1088   448    
-480   -144   
48     -384   
160    -192   
144    288    
-432   128    
16     304    
-112   96     
384    -384   
-544   -80    
368    -208   
32     336    
-192   112    
560    80     
-592   -144   
48     32     
96     -80    
128    112    
32     -96    
16     176    
400    208    
-416   -688   
304    -48    
112    -1344  
-208   240    
-704   -1648  
-192   752    
1712   -256   
-912   -1072  
656    272    
-32    176    
-400   32     
272    64     
96     -224   
512    -1184  
-16    192    
-400   -272   
144    160    
48     -240   
32     -464   
-112   -32    
-64    -608   
80     -128   
192    -608   
-240   112    
288    -192   
-304   544    
256    144    
624    32     
112    -432   
-512   32     
512    -256   
-544   112    
416    -64    
320    48     
-736   0      
224    -48    
-112   -160   
288    -432   
240    -176   
-800   -304   
640    112    
-32    -1024  
192    368    
256    32     
-256   80     
0      -32    
-128   64     
0      96     
-32    -256   
-416   -464   
352    -48    
-656   -80    
-128   -48    
272    -64    
-48    192    
48     112    
416    -688   
-688   160    
704    208    
-592   288    
272    -160   
512    1088   
-16    1376   
176    1312   
192    48     
-80    192    
-208   144    
112    16     
208    48     
-256   -160   
176    176    
112    -32    
80     -80    
128    -688   
-240   96     
0      176    
112    -96    
80     -224   
-48    -16    
-80    -144   
-112   -304   
-640   -96    
240    -288   
496    368    
32     -240   
-48    208    
16     -464   
-96    -352   
384    -1280  
336    -816   
128    496    
-96    208    
336    480    
-368   144    
144    -480   
208    336    
-208   -192   
-112   80     
80     -64    
160    -16    
112    560    
-384   -240   
272    0      
96     -928   
-288   -256   
144    400    
-288   -80    
784    -96    
-688   32     
-448   -96    
256    336    
-464   -48    
480    -528   
-48    -128   
-192   -384   
-16    160    
96     -112   
400    -96    
288    -272   
-208   -160   
-64    240    
144    -144   
352    -192   
192    -64    
-544   -272   
-16    832    
96     96     
-48    -160   
-1280  48     
-64    -336   
144    48     
-112   160    
240    16     
192    -416   
-608   112    
-160   96     
432    64     
-1360  1584   
2864   -688   
-784   416    
-544   -656   
224    -1088  
752    -896   
-336   928    
352    -896   
-464   -320   
-448   96     
464    32     
16     112    
-432   96     
-64    -272   
144    144    
144    64     
-256   272    
-480   -256   
176    -160   
96     512    
-80    16     
224    928    
768    -208   
-864   272    
848    -336   
-352   80     
80     544    
288    432    
-64    288    
-384   -64    
128    -192   
-48    -160   
-144   176    
-208   208    
16     176    
304    96     
0      96     
-32    -48    
400    256    
-192   -80    
112    -16    
-128   64     
-256   32     
128    -32    
-464   48     
192    416    
-240   128    
528    1248   
-384   704    
-272   32     
864    -336   
-208   208    
-288   -112   
192    240    
-32    -64    
-112   -432   
-288   288    
-240   -144   
112    -352   
208    288    
176    -416   
-544   144    
-208   144    
-352   -288   
304    0      
-1232  -80    
-592   432    
608    -144   
-112   224    
-448   -176   
144    -160   
976    416    
-2080  -112   
512    224    
944    -32    
-224   224    
-464   16     
-576   -320   
80     -144   
432    -592   
-640   -32    
-160   96     
-208   128    
-32    -96    
384    -48    
-144   -16    
208    224    
-160   176    
224    96     
-416   -624   
496    -1040  
-288   96     
112    352    
-32    384    
128    48     
-608   80     
624    176    
-272   -240   
-48    -400   
-256   -32    
384    112    
-16    192    
-48    192    
-96    -32    
-80    16     
288    -32    
-48    -16    
-240   -160   
128    224    
80     448    
-32    352    
192    176    
-672   -32    
80     400    
32     464    
-144   320    
544    144    
-176   -64    
-624   -16    
112    192    
496    288    
160    240    
-304   256    
-400   -800   
-112   -160   
-144   208    
-48    576    
448    128    
-16    192    
-144   144    
-16    416    
48     -32    
240    128    
176    256    
-240   64     
-32    176    
144    0      
240    -272   
-800   -80    
80     336    
432    48     
-544   304    
224    0      
-16    -112   
-64    32     
-48    -112   
80     -112   
-96    -64    
256    480    
352    224    
-304   -48    
-80    -16    
240    144    
-1168  -1296  
960    -352   
-784   80     
-352   -144   
832    176    
32     16     
-336   -80    
-304   96     
752    176    
-48    64     
48     160    
-432   96     
-96    80     
464    160    
-176   80     
96     -224   
-144   400    
64     -16    
-240   -16    
256    128    
-320   -320   
1360   -416   
-1232  416    
1008   192    
336    -160   
-832   128    
208    -96    
-192   256    
1008   32     
-496   32     
0      -64    
-256   320    
752    80     
-288   144    
-128   16     
0      112    
96     0      
80     16     
16     160    
208    96     
-288   144    
144    16     
192    144    
-144   48     
-144   112    
-80    144    
368    112    
-272   192    
192    64     
-176   80     
2176   1168   
-2000  -208   
-3456  1360   
2784   144    
-288   -736   
-1328  192    
976    -208   
-352   -96    
432    -608   
-64    48     
48     -80    
-368   -80    
32     112    
288    0      
128    -16    
-160   128    
64     160    
64     48     
16     208    
192    208    
96     176    
-32    192    
-816   -208   
928    -704   
-608   -192   
528    -528   
-592   208    
640    -80    
-480   160    
-144   0      
288    80     
16     96     
304    64     
-64    112    
-160   64     
-32    -48    
304    -16    
96     208    
-240   -16    
96     -64    
320    64     
-64    -1024  
128    96     
-352   -2336  
864    16     
-464   160    
48     128    
384    16     
-32    224    
144    -48    
112    144    
-128   224    
512    80     
-96    -256   
-160   160    
-96    176    
432    -384   
-304   256    
544    -320   
16     96     
-112   144    
112    48     
0      96     
48     112    
64     64     
48     176    
-96    208    
48     16     
-288   96     
336    -112   
-64    112    
-128   -352   
-752   1040   
960    48     
-1584  -80    
48     -592   
1216   -192   
-160   -960   
-192   128    
368    208    
-400   0      
368    288    
32     -16    
288    384    
-448   -32    
144    320    
448    -144   
-208   256    
160    -304   
-80    240    
208    -1328  
208    512    
96     1088   
144    448    
-16    64     
-352   192    
240    144    
304    64     
-96    -48    
96     -240   
-320   -448   
32     -928   
336    -96    
0      -224   
-144   256    
-288   0      
128    288    
272    112    
-32    -160   
64     64     
112    32     
-128   32     
128    240    
144    464    
-80    544    
240    544    
0      992    
384    944    
-144   64     
192    -16    
336    112    
48     48     
64     -48    
-160   240    
-432   -144   
1344   -128   
-624   -496   
-256   -144   
144    -80    
-160   -496   
608    208    
96     1456   
272    0      
-160   -1040  
-144   48     
352    -80    
256    192    
-320   96     
96     160    
96     -48    
208    -912   
-16    -64    
-80    -336   
-96    192    
128    48     
176    64     
-96    16     
-96    112    
16     -256   
240    272    
-64    160    
-320   336    
112    112    
288    -1088  
176    720    
-496   48     
272    -1344  
576    -96    
-64    -48    
-240   112    
-208   -2032  
400    -896   
528    -528   
240    304    
-560   -16    
16     -16    
320    -96    
544    144    
-320   -544   
-272   96     
-48    416    
288    -96    
-672   48     
-432   -64    
944    624    
-1152  -160   
432    -400   
624    -2032  
-160   -624   
224    224    
-16    -576   
-448   -1632  
192    16     
672    0      
528    176    
-624   -80    
-128   32     
-352   -96    
256    -320   
64     -144   
-256   -64    
0      16     
272    160    
128    384    
-160   -368   
-16    368    
352    -64    
160    -64    
-368   -384   
64     -304   
80     336    
464    -160   
-272   -64    
-352   -112   
-432   -736   
1760   -1088  
-608   464    
-16    -464   
-208   -736   
-608   -496   
304    624    
672    -1104  
-416   -928   
-368   -272   
496    320    
-96    272    
144    80     
-272   -240   
0      128    
-224   16     
320    16     
-32    -256   
-80    160    
112    448    
-16    -80    
240    896    
256    -1568  
-1808  384    
1792   -416   
-336   272    
288    48     
-464   16     
432    -192   
144    -112   
-48    592    
-352   416    
-416   32     
528    -192   
-272   256    
160    -208   
288    -48    
-288   -432   
560    288    
-624   256    
-80    192    
112    -80    
176    -256   
400    -64    
-368   -1264  
1216   -1552  
-80    -208   
80     512    
480    128    
48     -128   
-176   -160   
560    256    
128    -928   
-160   -64    
-208   112    
-192   48     
-368   -384   
576    -192   
-896   -32    
-640   -16    
128    -288   
576    -48    
160    144    
-208   -336   
-208   -32    
192    -272   
320    304    
288    -416   
-368   160    
304    -16    
208    480    
-432   400    
-864   -1376  
-368   -96    
0      -336   
-320   64     
1088   64     
-848   416    
-608   288    
784    528    
176    -80    
-176   0      
-288   -96    
-1632  -16    
64     48     
208    -112   
240    128    
-368   -64    
0      144    
272    -48    
-208   80     
480    -864   
-352   304    
432    0      
-320   256    
-352   -160   
320    48     
-176   64     
-352   -16    
-160   16     
-640   0      
-160   48     
-224   80     
-240   16     
-48    -80    
-208   -80    
144    -112   
208    128    
-464   32     
480    272    
-304   96     
96     176    
-32    -16    
240    -16    
0      96     
-32    160    
0      96     
128    16     
208    272    
-144   128    
-64    160    
-112   16     
-112   64     
-128   -112   
-400   64     
400    -208   
-608   128    
0      160    
464    -32    
-48    -144   
-160   64     
48     176    
-640   176    
352    208    
-208   32     
-112   128    
64     16     
-96    112    
48     -384   
192    -80    
96     -64    
-48    -144   
-240   32     
-32    144    
-80    -32    
-128   -32    
80     176    
-256   192    
32     -48    
-272   -32    
16     48     
-160   -208   
-16    144    
-224   -80    
400    1648   
1440   48     
-1472  416    
-336   -48    
128    -64    
320    -16    
-80    48     
-272   224    
240    -160   
-384   224    
256    -272   
-16    224    
-480   32     
-304   16     
304    16     
-400   304    
256    -304   
128    -112   
-128   288    
320    -16    
560    -368   
-1488  256    
784    176    
-768   48     
576    128    
384    64     
-1344  256    
224    -32    
368    48     
192    80     
96     32     
-400   128    
-144   32     
192    64     
-32    80     
272    0      
-176   0      
80     -96    
-64    48     
224    16     
-288   176    
-16    240    
-160   -16    
384    128    
-192   -224   
-352   -32    
64     288    
176    0      
48     80     
80     304    
-1120  624    
1088   160    
-64    96     
-1104  -112   
256    400    
576    64     
-576   0      
176    -304   
-576   -240   
64     -32    
272    64     
144    96     
-128   80     
-192   -64    
320    48     
96     128    
-48    96     
-112   48     
80     16     
112    32     
-320   -96    
608    912    
-464   -416   
-576   -32    
624    -624   
-96    0      
0      256    
-32    -32    
112    176    
176    112    
-80    32     
-80    144    
-32    80     
0      -80    
112    16     
32     -32    
-160   192    
64     -64    
208    224    
-144   224    
288    -128   
-96    -16    
128    128    
224    0      
-48    320    
368    -352   
-720   336    
208    144    
-208   -64    
368    128    
0      0      
48     96     
80     432    
-704   208    
544    -160   
-16    112    
-176   64     
224    48     
-352   128    
-80    96     
224    16     
-48    16     
-112   128    
-64    96     
64     64     
144    96     
352    256    
-704   176    
80     32     
176    112    
624    288    
-1312  -480   
1136   -1840  
304    432    
368    96     
-1392  32     
448    480    
224    288    
192    16     
-144   0      
-528   96     
-224   16     
528    304    
208    144    
-496   -16    
336    32     
-64    256    
320    160    
-368   64     
48     144    
112    336    
64     464    
80     80     
-112   -272   
-80    96     
432    624    
160    80     
-224   384    
128    192    
480    1040   
160    480    
80     -176   
-144   432    
48     -176   
112    208    
336    -224   
-592   -560   
48     128    
-176   16     
176    -784   
-144   -32    
176    192    
16     80     
-80    -272   
16     48     
128    32     
192    384    
-144   576    
48     -320   
144    -576   
-80    80     
16     -432   
80     448    
128    208    
224    -112   
-480   -256   
768    -1360  
208    -64    
-320   32     
-208   -48    
608    560    
48     1168   
272    -96    
-368   -16    
-192   0      
224    192    
176    160    
48     16     
-112   -16    
-32    -320   
-48    -320   
-96    320    
224    32     
16     32     
176    176    
80     16     
-16    64     
16     624    
-192   608    
160    -48    
608    64     
-400   112    
16     32     
16     48     
-208   368    
464    -96    
-320   -432   
-144   288    
320    -336   
144    128    
-160   0      
-96    528    
-272   96     
368    -48    
592    -224   
-48    80     
-176   272    
128    176    
-160   112    
128    -80    
272    240    
-80    -96    
-32    80     
112    -624   
-816   1184   
1936   -240   
-1600  128    
320    -160   
144    512    
16     192    
-64    -272   
-416   128    
-16    272    
-160   128    
128    -96    
48     352    
176    160    
-224   -208   
-240   -96    
192    272    
512    224    
-432   624    
-144   -864   
464    688    
48     224    
-272   48     
-192   176    
16     80     
256    112    
144    256    
32     -64    
-288   -864   
-96    -80    
688    -384   
-1120  1776   
2080   480    
-368   208    
80     128    
-224   272    
1056   -144   
-992   -48    
128    -32    
400    -528   
-176   272    
-16    -416   
176    128    
-48    -208   
144    256    
224    -144   
-96    160    
80     -1008  
0      192    
192    32     
-16    32     
48     16     
-656   -1920  
1536   -2640  
-288   288    
-80    816    
-448   496    
288    192    
144    -208   
-80    16     
-112   0      
512    -128   
-288   144    
224    336    
-64    96     
208    48     
400    32     
-224   -144   
80     -496   
176    -160   
0      -224   
96     -80    
48     -784   
-160   -400   
720    -544   
-400   16     
528    -800   
16     448    
768    352    
64     736    
144    208    
-272   -48    
352    -48    
304    64     
-512   160    
32     -16    
400    -48    
-256   0      
-16    -32    
48     -464   
192    32     
144    -16    
32     144    
-16    -224   
0      64     
448    -224   
-112   -64    
64     0      
32     0      
-464   -112   
32     -240   
480    448    
672    2672   
-2000  1216   
2048   -144   
608    80     
-560   -608   
-656   32     
448    -128   
64     -64    
304    400    
-192   -288   
-256   144    
240    -320   
-304   -224   
480    -208   
-352   -32    
432    -64    
-192   -80    
16     -208   
-448   -384   
624    -1840  
-64    -128   
-320   80     
272    272    
-32    160    
-144   -96    
496    -48    
32     -32    
-384   80     
192    16     
256    32     
-368   -80    
-32    80     
448    -144   
-272   0      
-32    -320   
288    96     
208    16     
-528   96     
512    256    
-144   16     
-32    128    
160    -80    
-496   0      
96     -64    
-16    -80    
96     -304   
-1120  -144   
208    -304   
352    144    
112    -592   
-64    96     
-16    -2368  
176    544    
64     -32    
160    672    
-448   192    
544    112    
64     224    
-224   -48    
-112   -96    
192    -176   
-112   -48    
-256   -80    
320    48     
96     -224   
-176   64     
64     -816   
32     -368   
0      -288   
160    304    
-96    272    
16     16     
16     -96    
96     -192   
-224   -208   
-16    -144   
160    352    
-64    -240   
96     -432   
-80    -32    
-48    128    
176    -432   
-1008  -1104  
560    -288   
-224   80     
-720   -192   
1072   128    
-224   32     
-368   80     
112    -64    
32     0      
-128   240    
-480   -96    
128    96     
-48    80     
960    32     
-1024  48     
-944   -160   
-64    112    
320    -224   
-16    -288   
-128   224    
-656   -416   
768    80     
672    -112   
-1536  64     
944    -192   
-1904  32     
192    128    
368    -224   
512    -96    
-608   128    
0      48     
368    64     
-496   0      
-16    80     
-176   112    
16     -80    
128    64     
112    -64    
-496   -64    
80     128    
-144   16     
304    128    
-224   -160   
-112   32     
160    -32    
-576   -160   
384    272    
96     16     
-176   48     
-16    16     
-928   -1552  
2880   192    
-192   0      
-1312  144    
1424   336    
-1072  -352   
640    32     
-176   -384   
-64    480    
-208   -96    
-48    192    
256    -32    
-128   80     
-144   -16    
144    240    
-336   64     
-576   160    
240    288    
-256   96     
144    -64    
-16    -128   
-16    128    
-720   -336   
1088   -656   
-320   96     
288    -288   
-432   -96    
240    144    
-192   -32    
-192   80     
400    16     
-80    -16    
144    128    
-992   -64    
-112   96     
-16    16     
272    128    
-128   144    
-192   -16    
128    112    
-16    -112   
-272   112    
-64    80     
-144   -64    
-192   -112   
48     80     
-144   -416   
-160   176    
-400   144    
336    16     
-16    64     
-272   16     
416    -64    
-480   32     
-176   144    
-128   -80    
432    320    
-608   48     
48     -160   
304    -16    
128    -16    
-304   -160   
-128   160    
-144   -96    
368    144    
-80    -64    
-80    0      
-528   336    
512    -80    
-464   -32    
320    528    
-336   512    
1312   1952   
-1248  720    
576    -64    
912    352    
-272   320    
-544   1008   
528    480    
384    -416   
-288   32     
-176   -192   
-272   144    
112    224    
352    -448   
16     496    
-128   -256   
-64    544    
-16    640    
-96    -432   
16     176    
96     64     
32     352    
-352   -112   
208    256    
80     16     
144    -80    
176    144    
64     224    
0      496    
-80    368    
304    32     
-432   -384   
80     432    
-128   -288   
64     192    
176    -64    
-176   320    
0      32     
176    -960   
-592   -1008  
176    464    
96     288    
-80    240    
0      -160   
-272   0      
-112   128    
368    48     
32     -464   
-416   -176   
-96    -48    
368    208    
208    800    
80     -160   
0      -720   
-480   -624   
-16    -288   
-176   -336   
16     -336   
16     288    
240    -848   
-432   208    
-80    1072   
320    -128   
160    -160   
-32    48     
-336   -48    
240    16     
144    144    
64     -160   
-448   96     
176    -96    
32     96     
-144   -96    
64     176    
-80    336    
-64    240    
-32    -112   
-112   -416   
352    -768   
336    16     
-16    -96    
-336   -80    
64     240    
816    912    
-800   352    
416    -384   
160    272    
352    -384   
48     0      
-256   -144   
176    -448   
416    1072   
208    416    
-352   -752   
-208   384    
16     -320   
448    -80    
96     320    
-64    16     
-224   -80    
-32    16     
384    464    
80     16     
-160   368    
-304   96     
240    -32    
752    -272   
-64    592    
-352   -112   
320    240    
0      -64    
96     -1584  
-64    -192   
-48    224    
336    352    
192    416    
-32    -48    
16     -80    
-224   240    
240    0      
128    -64    
-208   -240   
96     224    
-32    -240   
208    48     
16     144    
432    -352   
-528   -192   
144    -48    
192    64     
0      128    
16     128    
304    144    
-368   1136   
304    528    
0      704    
736    48     
-1200  -336   
0      -32    
768    432    
-336   368    
224    224    
-336   -48    
176    -144   
-16    128    
80     64     
48     0      
0      304    
208    96     
32     80     
-160   -112   
144    -336   
96     80     
-192   192    
64     112    
-256   768    
1488   -1056  
-688   224    
112    -1120  
320    160    
-192   144    
464    -128   
-320   96     
-80    176    
-304   -96    
528    96     
128    -32    
-176   208    
-288   -16    
320    -128   
96     112    
-160   -112   
-80    -240   
-336   -400   
240    32     
288    336    
416    592    
-1008  224    
-256   -96    
464    -16    
384    -64    
448    304    
-736   -240   
-416   96     
448    -112   
-144   96     
0      -16    
-432   -48    
256    -416   
240    0      
16     -1632  
-160   48     
-32    -96    
512    -128   
208    192    
-400   80     
80     -48    
176    96     
128    16     
-336   -208   
448    192    
-64    -80    
560    0      
-16    -144   
784    -128   
-2096  672    
1632   -560   
-928   304    
768    -208   
64     -288   
64     0      
-48    -112   
128    -176   
368    352    
-432   112    
272    -112   
112    -352   
-80    80     
64     -16    
-176   128    
16     48     
304    96     
-384   32     
-96    -48    
400    576    
576    -112   
-1008  112    
608    64     
-416   128    
160    -144   
1088   208    
-944   -32    
-16    160    
480    -160   
-64    48     
64     -128   
-352   128    
320    128    
-496   -64    
800    240    
-48    16     
-64    -1712  
-272   -352   
128    -2928  
368    64     
-16    256    
112    -32    
-112   144    
-128   -240   
384    144    
208    -128   
-576   -752   
320    -272   
176    -272   
176    112    
208    -768   
-480   -192   
672    432    
-704   -288   
352    -80    
192    -128   
-560   -224   
384    -736   
0      -384   
-16    -400   
-288   32     
400    -416   
320    176    
-240   -16    
48     208    
-304   16     
80     -272   
32     -112   
16     -176   
-160   192    
-240   -432   
256    -256   
32     -3248  
-80    144    
208    -176   
0      208    
0      32     
128    -80    
128    -80    
80     384    
-272   -80    
96     0      
-528   1856   
1504   -400   
-2032  -48    
512    -128   
816    -64    
-560   -704   
48     -128   
-272   -960   
288    -304   
-160   96     
320    -64    
-192   16     
-272   176    
896    16     
-736   208    
256    -240   
-160   96     
-32    192    
80     16     
-32    -16    
-416   -544   
1248   -608   
-1152  -128   
1072   -288   
160    0      
-272   208    
-432   80     
432    256    
640    64     
-432   -96    
-272   -48    
96     48     
272    80     
288    112    
192    112    
-528   -128   
240    160    
64     -192   
432    32     
-512   128    
-80    96     
720    96     
-416   -16    
80     112    
80     -208   
-160   -80    
272    -80    
-512   128    
-80    -272   
-48    0      
-240   2000   
1072   -688   
-1920  -304   
1216   96     
-432   -3296  
-432   80     
848    416    
-512   -16    
80     48     
-64    144    
-176   96     
144    0      
-176   -16    
32     -176   
-80    160    
352    48     
0      160    
-48    -32    
176    16     
192    -1616  
48     -112   
-128   432    
464    -688   
-1312  352    
1392   336    
-112   256    
-192   -1216  
704    -208   
-608   240    
416    160    
160    -384   
-304   240    
256    -176   
112    128    
112    -384   
-32    -48    
-608   208    
288    -16    
0      80     
48     -96    
-16    48     
-16    -128   
128    64     
-16    -352   
-416   -48    
576    -576   
32     224    
-656   -272   
512    112    
0      -96    
-448   160    
-208   80     
-48    80     
64     -320   
176    96     
144    432    
0      -608   
368    -176   
416    352    
0      336    
-80    -112   
48     192    
-112   48     
192    128    
-208   80     
192    80     
-128   -160   
240    -16    
192    400    
-240   -160   
-208   -64    
160    0      
-496   -1248  
-1392  -288   
512    -304   
-624   160    
1344   -192   
-496   -384   
-800   -752   
-288   -304   
64     592    
256    -256   
112    -352   
-544   448    
-96    0      
496    -240   
-720   64     
-240   448    
-80    -224   
448    384    
-48    400    
144    848    
-32    384    
-16    -288   
-80    -112   
400    320    
-272   48     
-304   -208   
272    128    
-448   960    
240    992    
-320   -368   
-128   0      
448    -144   
-48    560    
-128   352    
192    144    
-80    -416   
16     -304   
-128   368    
-64    -96    
-128   96     
16     -48    
-64    96     
-176   208    
80     0      
-16    144    
-16    -224   
-592   -608   
272    64     
-32    112    
160    112    
16     16     
64     640    
96     16     
-192   528    
336    608    
-96    -96    
-128   16     
400    672    
-96    896    
-592   -1152  
208    -32    
-128   112    
16     64     
0      144    
-96    208    
-80    352    
-304   0      
320    -96    
-80    -64    
-192   160    
48     352    
-160   464    
48     -400   
112    0      
-128   -64    
112    384    
-64    832    
-272   560    
256    -656   
16     -288   
-144   256    
-112   704    
-352   -176   
560    32     
320    -160   
352    -864   
368    720    
16     -96    
48     -112   
-432   -304   
256    144    
16     -304   
32     336    
160    96     
-128   -96    
80     176    
480    64     
-672   192    
128    112    
240    -96    
32     -96    
-432   112    
-160   1168   
208    96     
-432   288    
656    112    
-544   -96    
304    160    
-320   272    
304    272    
-96    -80    
-96    176    
208    144    
-128   64     
-160   -80    
112    96     
-48    96     
-400   -64    
432    496    
-208   272    
128    64     
-48    -32    
-32    32     
32     112    
96     112    
192    160    
-528   64     
336    144    
-64    176    
128    48     
-208   96     
-400   96     
0      -816   
720    -368   
-576   -128   
208    48     
448    32     
-240   80     
0      96     
192    544    
48     64     
-176   240    
288    16     
-48    80     
-32    16     
128    64     
-336   48     
16     48     
128    -16    
128    -32    
-16    -112   
96     112    
208    80     
336    720    
-1264  336    
800    16     
-272   176    
624    32     
-32    208    
-176   192    
128    -64    
-208   -64    
192    -64    
128    272    
-160   96     
-16    -32    
208    128    
144    0      
-160   144    
144    48     
-560   288    
224    -16    
96     32     
384    48     
-112   208    
-1440  -16    
368    -112   
1168   -224   
288    -32    
-128   192    
-352   -128   
160    -112   
160    64     
16     272    
-272   208    
48     112    
560    96     
-96    256    
-496   -64    
96     -16    
288    64     
128    176    
-352   -16    
-160   144    
944    320    
-320   -2784  
-336   176    
80     96     
-128   128    
784    80     
-416   64     
192    32     
448    352    
928    -1408  
-2464  768    
736    0      
432    -64    
144    224    
-448   -80    
-64    176    
-128   -352   
704    -208   
-96    48     
-32    0      
-240   48     
-112   192    
544    -96    
-304   112    
176    48     
-800   32     
592    -64    
-64    112    
-208   -176   
-48    192    
-160   96     
-32    -464   
864    240    
-704   -96    
400    48     
-352   80     
0      160    
208    0      
192    224    
-384   -64    
-368   96     
480    -48    
-128   160    
224    160    
-96    48     
336    144    
-656   -704   
656    64     
32     -1408  
-240   112    
256    96     
-112   112    
112    0      
-160   128    
336    -144   
-256   80     
-48    16     
-16    16     
192    304    
272    224    
-32    128    
304    528    
-352   272    
256    32     
192    176    
80     -416   
288    240    
-240   64     
-256   -80    
384    -96    
304    112    
-64    -16    
-192   160    
160    16     
-160   -432   
144    176    
176    48     
-288   400    
368    272    
-240   400    
64     -528   
-32    112    
32     -224   
16     -64    
-80    -16    
144    48     
96     240    
-48    16     
-96    32     
-32    -224   
112    -48    
192    -1552  
-1200  1296   
1264   -160   
-864   144    
752    -576   
-176   -384   
-352   -32    
-80    128    
448    192    
-16    0      
-64    -16    
-304   16     
432    0      
-384   -272   
544    -240   
336    64     
-32    96     
-288   -336   
288    480    
16     -432   
32     320    
-576   1616   
1248   -80    
-1616  416    
960    -176   
-96    -144   
64     -272   
-208   -256   
528    -256   
-240   -272   
-368   -336   
224    208    
-96    -160   
128    144    
80     -320   
144    288    
-64    240    
256    480    
16     224    
-80    -192   
0      -176   
304    80     
96     -544   
-336   -368   
144    -16    
-16    128    
192    336    
128    -32    
-64    -80    
112    -112   
-80    -2224  
-1312  1392   
3024   -496   
-960   288    
-736   352    
592    -640   
320    -304   
-656   -592   
560    640    
32     -48    
-368   272    
576    160    
32     -48    
-192   128    
-176   208    
304    -288   
48     128    
-144   -32    
160    128    
-288   -256   
80     -784   
-32    -16    
-336   560    
2528   -128   
-1696  16     
208    -560   
704    -2832  
-704   320    
16     -496   
96     -48    
0      -160   
-144   -112   
496    -432   
-16    -304   
-320   -256   
160    -320   
-256   -176   
0      16     
-160   -128   
-192   -384   
384    -624   
-96    -320   
-32    -96    
-176   -944   
96     -176   
-576   112    
1024   1040   
-528   848    
-416   -464   
464    -48    
-128   128    
-336   -160   
560    -336   
-192   -80    
464    -160   
-368   80     
160    96     
16     32     
-368   -752   
624    624    
-720   208    
-64    -32    
608    176    
0      144    
-128   48     
-16    -16    
80     -32    
288    -16    
-1088  -112   
-144   144    
96     -144   
-96    -592   
-32    -160   
1024   -1632  
416    -176   
-16    -48    
-496   -144   
-112   368    
368    480    
128    48     
-64    144    
-496   448    
128    -336   
48     272    
256    32     
0      -352   
-320   -192   
368    -288   
272    -496   
0      32     
144    592    
128    272    
-144   -224   
240    -208   
240    224    
-48    -192   
-864   256    
992    176    
-576   96     
576    416    
-160   768    
-16    -512   
544    -48    
-48    -48    
112    208    
-240   -1632  
-64    336    
48     208    
192    448    
-32    -352   
-656   -928   
-64    -144   
272    -160   
-448   48     
240    96     
-224   224    
-16    -80    
416    144    
-464   -256   
432    864    
-256   176    
544    -192   
48     224    
-304   304    
-448   336    
976    48     
256    720    
-1360  1344   
48     192    
480    0      
192    464    
-432   -592   
0      -160   
-416   -96    
80     0      
-16    80     
-176   -80    
-64    192    
-1072  48     
-32    112    
-80    0      
64     304    
112    -80    
128    192    
-352   272    
336    416    
-368   240    
-144   240    
160    -192   
192    704    
-416   624    
-144   32     
176    -48    
-944   80     
272    -656   
-1776  1152   
736    -112   
-368   128    
304    240    
-416   224    
-16    32     
-608   -336   
656    -320   
-192   48     
192    160    
-64    224    
-16    -48    
-176   -144   
176    -48    
-400   128    
0      -304   
32     -160   
80     -32    
192    16     
-416   -176   
448    -432   
-704   224    
1680   80     
-768   -32    
128    192    
-272   64     
32     96     
512    48     
-576   144    
256    112    
-656   16     
448    64     
-784   80     
-16    48     
-16    16     
0      192    
240    -112   
-352   176    
192    0      
-336   144    
320    32     
80     144    
-240   48     
240    -96    
-320   -48    
-224   -176   
48     96     
-128   16     
-144   192    
1440   1088   
-880   256    
-1904  -16    
1920   -176   
-80    -16    
-624   112    
112    0      
-144   0      
-48    80     
-16    -48    
48     -16    
-304   0      
-144   160    
-64    -48    
144    96     
-112   -48    
80     176    
-80    48     
-128   48     
240    32     
-80    16     
-112   224    
-432   160    
1392   -352   
-576   800    
-224   -128   
-368   448    
752    432    
-176   192    
160    192    
-624   -160   
-32    112    
416    192    
80     48     
-16    -16    
-304   16     
-304   80     
304    -160   
288    176    
272    80     
-528   -224   
-432   -48    
0      -144   
640    -80    
272    224    
-256   256    
-384   -256   
-352   48     
224    -192   
-544   -176   
-48    672    
-528   208    
-176   176    
480    336    
-608   144    
-400   -48    
0      -48    
448    240    
-368   16     
-400   224    
-112   304    
-368   32     
464    64     
-48    64     
32     48     
-240   160    
400    176    
-240   160    
240    -144   
16     0      
192    128    
-1600  -2224  
2448   -1664  
-1440  672    
-576   -64    
864    0      
-800   -64    
-272   -64    
624    416    
0      0      
-32    336    
224    80     
-384   48     
320    -48    
-224   144    
144    112    
48     80     
-288   160    
-64    -112   
32     144    
480    304    
-576   144    
592    352    
160    -48    
-368   -96    
32     80     
48     112    
-16    128    
48     64     
208    16     
-304   96     
256    80     
16     144    
192    48     
-272   192    
560    208    
-576   64     
-224   -48    
464    -16    
224    208    
-336   144    
-48    128    
288    128    
144    48     
0      -32    
112    48     
-560   -64    
-48    64     
224    64     
-176   48     
80     96     
160    0      
-208   -80    
-288   -464   
544    -384   
-16    528    
112    352    
192    704    
480    336    
-576   -208   
96     0      
240    -80    
-96    -224   
-464   -112   
224    288    
720    400    
-560   400    
48     112    
-176   288    
272    240    
144    544    
-48    128    
-144   16     
-16    -96    
-16    16     
160    112    
16     176    
176    288    
0      304    
-144   544    
192    -448   
-192   -320   
-64    -64    
224    304    
32     -720   
-96    448    
752    64     
-960   -144   
192    144    
352    80     
464    176    
-288   -368   
-320   -448   
160    -416   
32     -112   
384    32     
-256   32     
48     48     
-96    608    
128    -224   
240    -448   
-48    688    
-144   -32    
256    208    
-672   -928   
608    -208   
192    656    
-784   -592   
480    -256   
160    -496   
-32    1680   
224    -640   
-464   -480   
-368   528    
144    208    
432    -112   
48     -16    
-224   160    
-64    0      
416    32     
0      368    
-96    -176   
96     224    
16     400    
64     -432   
-16    128    
-112   560    
304    64     
80     -448   
-432   112    
80     -144   
256    64     
160    -112   
-320   272    
-720   -816   
224    720    
672    -864   
-1264  -1120  
688    224    
384    -32    
-656   176    
400    -1504  
352    1296   
-16    512    
96     -128   
-64    -320   
-32    240    
80     176    
352    208    
-96    128    
-160   80     
288    128    
80     -384   
-128   -16    
-176   -272   
624    1072   
1136   -464   
-752   432    
512    -1504  
-848   -384   
608    -640   
-576   -608   
560    -832   
-176   -384   
-160   -304   
256    128    
-80    528    
0      720    
464    400    
-32    -400   
-480   112    
224    -960   
16     -288   
256    -608   
16     32     
-64    48     
-144   -240   
176    -304   
-240   1008   
704    -80    
-96    -240   
-496   -304   
-240   -368   
352    176    
-304   -288   
64     48     
16     -368   
48     48     
240    224    
112    0      
-272   -368   
288    -32    
272    336    
-608   400    
-160   64     
496    -112   
48     192    
304    160    
-592   544    
0      -512   
576    304    
272    -16    
144    272    
-416   496    
-80    384    
656    -1312  
-1504  -2352  
240    -32    
256    48     
544    -544   
-784   -224   
-144   -1824  
80     112    
320    16     
-160   -640   
-256   -208   
0      288    
128    -688   
176    -64    
-176   -752   
-96    112    
224    -96    
32     64     
-576   -48    
-16    -48    
256    16     
80     -432   
-288   -336   
-560   -992   
1360   -1136  
-912   -528   
608    -432   
-384   -640   
224    -272   
304    -304   
-560   -240   
336    16     
-256   -592   
-448   48     
-144   -160   
-48    -64    
320    -32    
240    -112   
-160   -240   
-176   -240   
208    -1136  
224    -384   
-272   -496   
-224   192    
-16    256    
272    336    
-144   -96    
112    -240   
128    -96    
-48    -272   
-368   -64    
32     -32    
640    480    
-800   240    
-208   -208   
880    -752   
176    -304   
-448   32     
-560   0      
496    -48    
160    -64    
112    16     
192    96     
-272   96     
-112   32     
144    -160   
144    -48    
-528   96     
128    -320   
256    -144   
256    128    
-240   128    
48     -2240  
-80    304    
96     -256   
416    -16    
-448   -80    
-224   -48    
304    224    
144    -80    
-128   -64    
-544   -960   
720    -240   
-704   336    
448    144    
-560   -208   
-256   512    
560    -816   
-32    32     
-128   -96    
80     -304   
-400   80     
480    -304   
128    96     
-80    -96    
-640   112    
480    -64    
-704   464    
800    -432   
-576   32     
-240   -272   
192    32     
608    -2096  
-800   352    
784    48     
-1520  -32    
880    64     
512    -192   
-896   16     
-16    16     
-544   240    
832    -48    
-368   48     
-384   -320   
-160   128    
176    -160   
-16    240    
416    -96    
-208   272    
-512   -192   
144    80     
256    16     
-192   96     
-176   80     
-272   16     
96     -64    
560    -48    
-432   -32    
288    -32    
-112   80     
-32    -64    
-816   -672   
1456   -1920  
-816   -144   
912    -32    
160    64     
-768   -16    
368    112    
-32    -64    
224    -112   
128    -96    
-336   -48    
224    176    
48     0      
240    112    
-112   -224   
-128   80     
160    -192   
-1184  -16    
-112   32     
-96    64     
-176   32     
-944   -80    
-336   -720   
96     368    
-272   -64    
-784   -144   
1296   272    
-864   48     
-416   64     
0      -336   
320    0      
-288   -224   
-416   128    
144    32     
-80    48     
-64    80     
-160   48     
-240   96     
128    48     
-64    -160   
-144   16     
