# Supplementary material for: A Fault Diagnosis Method for One‐Dimensional Vibration Signal Based on Multiresolution tlsDMD and Approximate Entropy
Source: Hindawi journal article supplement (doi:10.1155/2019/3262818), 2019-01-01
Supplement: f1 [file 3262818.f1.zip › 3262818.f1/gear signals/wear gear signal/Data1.txt]

272    240    
-128   384    
-64    112    
160    -288   
160    80     
32     -16    
-80    0      
144    80     
-240   -96    
752    576    
-176   352    
16     112    
-96    -112   
80     32     
64     -144   
-144   112    
64     -48    
-144   32     
-128   -208   
160    -208   
-144   192    
384    192    
-224   64     
176    -64    
32     96     
112    -48    
128    176    
176    -160   
-288   208    
112    -528   
16     192    
112    -976   
16     80     
-112   -80    
304    160    
-112   16     
80     80     
192    0      
48     112    
16     -96    
-112   -48    
192    192    
-64    -96    
32     48     
112    -400   
192    192    
-192   144    
80     32     
144    128    
128    80     
-16    176    
352    -480   
-160   80     
160    -112   
-96    -32    
288    -160   
128    -32    
96     16     
-144   64     
0      -16    
80     -16    
176    -176   
128    144    
-16    -32    
144    176    
-96    32     
96     -80    
32     32     
-48    -240   
112    0      
-160   -240   
32     64     
-16    -96    
144    112    
-112   -48    
272    240    
-176   -112   
80     -368   
32     0      
224    -480   
0      -320   
160    16     
96     -352   
192    -144   
0      -976   
144    16     
112    80     
-16    -96    
-32    96     
80     -96    
144    -176   
-224   0      
192    -512   
48     80     
176    112    
-16    -368   
-48    -64    
0      -880   
208    176    
-144   -288   
48     96     
112    -272   
96     64     
-112   80     
48     -80    
48     -32    
224    112    
-32    -128   
96     -176   
-320   -96    
224    -112   
-1248  -96    
48     -128   
128    80     
-80    -160   
-176   -144   
464    -320   
-128   -128   
-32    -1056  
160    0      
0      -16    
-32    80     
112    -176   
-64    64     
-128   -96    
-208   64     
32     64     
-128   -48    
160    -112   
-64    -80    
112    -48    
48     -256   
112    -48    
-48    -288   
64     -16    
48     -272   
224    48     
32     -160   
-16    -224   
-16    -64    
48     -48    
48     80     
-16    -128   
-384   -16    
128    -112   
-48    128    
-16    -96    
0      0      
-240   48     
288    96     
-96    -176   
192    32     
-112   -48    
80     -144   
32     -96    
32     48     
-80    -96    
-32    -80    
-240   48     
-144   -16    
-208   32     
80     0      
-16    96     
128    -448   
80     -32    
32     128    
288    80     
-400   -16    
336    16     
-272   128    
48     -16    
-48    -16    
0      -240   
0      96     
208    224    
-896   48     
96     -240   
144    112    
288    -224   
-144   176    
0      -160   
128    0      
16     -64    
128    -48    
-128   16     
0      -32    
-48    16     
208    32     
-160   48     
224    -80    
-240   32     
32     16     
0      640    
-32    -304   
-16    -48    
32     -544   
80     -208   
-528   96     
64     144    
-272   0      
112    32     
-16    64     
96     -96    
-416   -144   
-64    -272   
-80    -128   
128    -112   
-96    -32    
336    96     
-528   -496   
176    -1008  
0      48     
-160   -64    
-128   -224   
-128   -192   
64     48     
-224   -192   
-32    -208   
-48    -384   
368    240    
-272   -128   
80     -304   
48     -32    
-1408  -368   
-16    -96    
64     320    
-656   224    
-32    208    
-1040  160    
-112   -16    
-112   -48    
-16    128    
96     -32    
-192   0      
144    -176   
-48    112    
64     -416   
0      -64    
0      160    
-240   224    
96     -160   
-304   0      
32     112    
-128   272    
32     -432   
-528   -32    
64     640    
-32    -192   
-64    -384   
112    144    
-112   16     
80     -240   
64     192    
208    -80    
-64    400    
-160   -240   
-64    -240   
16     256    
-64    64     
64     -64    
-16    160    
-64    96     
-352   -144   
-144   80     
80     -16    
-208   80     
16     -112   
208    128    
0      -32    
-96    16     
96     48     
-128   -32    
16     144    
-128   176    
272    64     
-64    32     
-320   -320   
-704   -496   
208    320    
176    464    
-160   208    
64     -112   
-48    0      
-256   -96    
-64    -672   
-128   -208   
384    -32    
-16    352    
96     704    
-192   -16    
-32    -48    
144    304    
-224   240    
112    48     
-1824  128    
96     288    
80     -80    
-240   112    
-96    -80    
64     16     
96     144    
-304   144    
304    80     
-224   48     
80     16     
-48    64     
-64    32     
-80    96     
64     96     
-288   -32    
16     48     
-64    -32    
-64    16     
-80    160    
416    16     
-32    208    
-128   -272   
-64    -288   
144    352    
64     528    
64     96     
-64    64     
-336   -128   
-112   -720   
-464   -656   
-16    -112   
304    160    
112    48     
-32    -144   
80     96     
48     144    
-96    64     
128    -48    
48     144    
16     416    
-32    -96    
16     384    
-176   32     
176    0      
-208   896    
-96    -560   
272    48     
-224   80     
112    -64    
0      448    
-16    640    
368    1152   
-304   64     
-208   -1024  
128    544    
-96    0      
-96    -208   
160    32     
-16    192    
0      192    
80     80     
336    544    
-288   -464   
-48    448    
32     32     
80     16     
64     160    
16     160    
96     144    
-96    -144   
-16    -96    
80     160    
-48    192    
208    192    
-384   -528   
96     -48    
-16    64     
-32    -64    
-160   128    
96     -80    
32     48     
-240   32     
-176   32     
-128   64     
-16    80     
-48    96     
-32    -16    
-80    -96    
160    96     
16     32     
16     64     
320    304    
-528   176    
240    -48    
-96    80     
144    144    
-48    224    
64     144    
-144   80     
80     96     
-160   0      
128    -176   
-64    32     
-48    304    
224    -16    
48     32     
224    -16    
-160   96     
80     128    
-32    64     
144    48     
-112   112    
-48    -656   
-16    -128   
160    240    
-48    -16    
48     64     
-48    -32    
96     -160   
288    160    
-96    64     
128    -32    
-240   -256   
16     -64    
-32    32     
48     64     
64     144    
-80    -32    
32     -32    
320    128    
-176   -96    
240    128    
-16    -112   
96     -384   
-32    -32    
64     32     
96     128    
-80    32     
-176   -112   
48     64     
112    -64    
-80    160    
128    512    
-64    592    
-64    368    
-224   160    
176    128    
-304   -96    
112    -608   
48     0      
64     -80    
-48    96     
240    160    
-144   64     
-160   112    
272    16     
-48    -64    
144    -80    
-128   -128   
272    96     
-112   -16    
160    64     
96     176    
80     -176   
64     128    
-176   32     
32     16     
-64    32     
-32    96     
0      96     
-160   80     
80     256    
160    32     
-64    80     
0      80     
-128   -32    
272    -80    
-208   64     
96     -192   
96     48     
64     -464   
32     128    
80     48     
48     32     
160    176    
128    16     
-112   -64    
32     -64    
-16    -48    
240    336    
112    -64    
16     16     
-128   160    
192    -112   
-144   176    
112    -208   
64     32     
48     -800   
-128   64     
144    -176   
160    176    
-208   -160   
0      -80    
48     -16    
112    112    
-48    176    
80     -48    
64     112    
-96    -128   
80     144    
-16    -96    
96     -16    
64     -1536  
112    112    
32     96     
0      16     
-80    96     
400    240    
-272   128    
208    144    
160    96     
-272   -96    
64     32     
-16    -160   
96     64     
64     -32    
-32    112    
144    -416   
96     64     
48     -480   
48     64     
-48    -128   
240    80     
96     80     
-32    0      
-48    64     
96     -592   
96     80     
16     96     
0      32     
0      -144   
48     48     
64     -144   
16     64     
96     32     
80     80     
-16    80     
176    112    
64     160    
32     -256   
-64    160    
64     -80    
128    128    
-32    -32    
96     96     
-32    -48    
48     208    
48     64     
160    336    
-16    -256   
-96    48     
48     16     
-128   -128   
48     48     
160    -752   
128    32     
128    320    
96     128    
64     208    
0      96     
272    -32    
-32    -16    
80     -16    
48     16     
32     48     
192    -896   
64     288    
16     -752   
224    -624   
144    528    
320    -432   
-192   -352   
192    -2288  
-80    -16    
48     80     
64     128    
-80    -112   
0      -176   
112    -160   
96     96     
-64    -224   
400    640    
-512   -160   
32     -416   
-112   -96    
-176   -400   
304    -128   
48     -288   
336    -144   
-128   -80    
208    -16    
0      -80    
0      48     
80     -208   
-64    64     
64     -176   
-16    224    
0      80     
48     -192   
-512   32     
208    -16    
16     80     
304    192    
-96    -112   
112    -176   
-320   -736   
16     48     
144    272    
-464   -240   
128    -240   
-240   -416   
432    128    
-320   -96    
144    -16    
-176   192    
0      -144   
176    128    
-192   -64    
80     -32    
16     -192   
-32    -176   
-80    240    
-80    -80    
496    -288   
64     528    
864    576    
-32    528    
224    208    
-288   -128   
64     -320   
784    96     
-432   368    
256    -912   
368    272    
-128   -96    
128    -320   
96     -192   
32     -240   
336    -176   
144    736    
-368   -176   
32     -736   
96     448    
160    -64    
-64    -160   
96     32     
-160   336    
-32    64     
-688   -400   
480    240    
-128   400    
16     -816   
-112   -416   
224    -448   
176    208    
-16    128    
64     48     
96     0      
-80    -96    
-352   32     
496    -32    
-224   32     
112    32     
-112   32     
144    -96    
-288   -320   
320    -512   
-64    144    
336    -464   
-96    336    
-112   -560   
256    -32    
-480   128    
-160   -304   
256    64     
16     288    
-160   320    
112    -752   
-688   160    
592    544    
-528   -16    
192    -368   
-112   32     
80     -528   
160    -160   
-352   496    
-32    -352   
-16    -464   
160    640    
272    960    
48     608    
-368   -176   
80     -688   
-464   -720   
256    112    
176    48     
48     32     
-64    80     
-112   64     
0      -32    
-32    64     
80     48     
-48    96     
48     0      
-64    32     
-112   -272   
160    192    
144    128    
-528   192    
-608   -272   
80     112    
-288   -112   
32     160    
-192   -80    
64     144    
-112   -320   
-240   -208   
32     352    
-1808  -16    
-128   416    
-48    -160   
48     -128   
16     48     
-96    96     
-320   -160   
48     -96    
-336   -176   
-272   272    
16     160    
32     144    
144    496    
-384   144    
-144   96     
-176   0      
-112   -224   
-16    -144   
0      112    
-96    32     
-64    160    
112    144    
-32    224    
0      16     
-32    16     
96     128    
-352   32     
16     192    
-176   -32    
-112   -64    
144    512    
-224   192    
-1168  32     
0      -16    
16     -192   
32     96     
-32    -64    
208    64     
-48    -64    
-96    -128   
80     -16    
-32    -16    
32     80     
32     96     
128    160    
-32    144    
-96    64     
-336   48     
0      -16    
48     0      
0      16     
-48    -176   
0      224    
-48    0      
-64    80     
-16    32     
-32    -16    
112    128    
-96    96     
48     0      
-112   48     
-32    240    
-64    -128   
-112   112    
-752   64     
0      128    
-224   -112   
112    32     
-112   48     
160    64     
-128   16     
208    16     
-48    48     
-48    -96    
-64    96     
-16    32     
48     64     
-32    64     
160    208    
-544   -64    
256    80     
-368   -768   
-112   -352   
240    112    
-336   -208   
-48    -176   
-32    272    
32     224    
-288   -16    
96     -64    
-64    -16    
-48    208    
-240   -192   
336    16     
-672   -224   
64     176    
-32    -32    
48     48     
0      320    
-128   304    
-112   32     
-160   -16    
112    80     
112    208    
-144   112    
-32    16     
-64    32     
-48    -16    
416    192    
-304   16     
304    272    
128    272    
208    240    
-96    48     
-176   -32    
192    0      
-96    80     
112    128    
16     128    
192    32     
-224   16     
192    80     
-48    208    
-80    112    
-16    48     
112    16     
32     80     
-64    -80    
64     176    
240    16     
304    272    
-432   -48    
176    112    
0      48     
-128   -16    
-128   -80    
112    0      
-48    32     
64     176    
-352   -192   
224    -160   
48     112    
80     112    
32     144    
112    64     
-128   -128   
64     0      
-32    144    
-16    192    
112    96     
0      16     
288    160    
-256   -32    
240    160    
80     48     
-64    16     
160    112    
-96    64     
64     160    
64     80     
208    480    
48     -64    
-272   -16    
304    96     
32     80     
-144   16     
176    256    
-112   -16    
-16    64     
48     144    
0      96     
48     256    
-64    112    
0      -32    
64     -32    
112    48     
112    96     
48     224    
-256   16     
208    -96    
-208   -160   
160    112    
-288   -64    
64     96     
64     48     
-64    64     
336    48     
-128   80     
144    48     
-32    32     
128    48     
64     176    
-32    32     
-112   16     
80     -64    
-48    -96    
48     -96    
0      -240   
192    -688   
64     80     
16     112    
256    240    
-128   272    
64     592    
16     368    
-16    240    
128    208    
-64    144    
-176   -128   
256    384    
-64    80     
16     224    
96     176    
32     -1168  
-48    64     
48     80     
64     224    
-96    -16    
-192   -160   
80     -112   
0      96     
112    560    
-64    432    
48     -48    
16     48     
16     -48    
96     112    
-16    288    
80     -112   
48     -80    
-32    64     
112    560    
64     336    
-176   -256   
-144   -176   
48     96     
0      224    
160    48     
-224   -256   
368    224    
-128   -240   
-32    -112   
32     128    
96     64     
0      128    
80     -608   
-48    16     
48     240    
192    -80    
-32    128    
176    208    
-64    160    
48     112    
-160   -224   
-16    16     
48     -208   
32     -256   
192    -272   
-64    -48    
208    288    
160    256    
-272   368    
-128   -832   
-112   64     
128    208    
144    240    
-16    240    
-160   240    
112    -384   
176    -128   
32     160    
256    272    
-64    144    
96     -144   
48     128    
80     -64    
64     -32    
176    -272   
112    96     
96     336    
-176   368    
160    -400   
-176   192    
192    96     
48     160    
-160   160    
272    -64    
-192   16     
48     -608   
-80    -160   
-80    -272   
-48    32     
96     -16    
112    160    
96     0      
-96    -48    
128    -128   
32     176    
96     32     
-112   64     
752    400    
-144   64     
80     -48    
96     -96    
-144   112    
-16    -480   
-16    -112   
224    -288   
224    144    
-144   -416   
144    48     
-48    400    
96     -256   
-112   544    
112    64     
32     464    
-112   400    
0      160    
-464   -832   
0      96     
224    320    
-304   16     
48     -128   
64     96     
-128   368    
128    -224   
96     592    
32     384    
-32    544    
-96    -384   
320    1392   
-160   -176   
96     -208   
-16    448    
352    560    
-496   -848   
96     -528   
64     176    
448    528    
-400   352    
288    -512   
-304   64     
-144   -112   
-64    -224   
176    -32    
224    -192   
-64    336    
64     -2352  
96     -112   
224    -96    
-160   -128   
448    -160   
-240   16     
96     -1072  
-128   -32    
112    -96    
32     224    
64     336    
0      -176   
-64    -240   
-16    176    
160    -176   
64     -80    
-80    32     
112    16     
160    48     
-416   -1232  
224    16     
32     288    
-128   -336   
176    176    
64     -80    
-96    -304   
144    -256   
144    -496   
240    -32    
16     80     
-48    -128   
16     64     
80     -80    
32     -48    
16     -112   
48     64     
-80    16     
192    48     
48     -192   
48     -224   
-80    -128   
32     -80    
-176   -384   
160    -64    
112    -80    
32     -96    
272    -128   
-96    -848   
16     -32    
160    -640   
-32    -96    
608    352    
-432   320    
-80    -48    
64     80     
112    16     
-80    0      
-128   -16    
112    -32    
-432   -64    
64     -80    
176    -16    
-96    -16    
32     128    
96     -208   
176    128    
-48    -192   
16     32     
224    16     
-48    64     
32     16     
32     -16    
-176   -256   
80     16     
-288   -32    
-48    -64    
-240   32     
32     112    
48     64     
-192   -688   
576    48     
-272   -1200  
352    -272   
-128   128    
208    16     
-112   -64    
160    -176   
-128   -112   
96     -64    
-32    96     
112    -48    
-288   112    
176    -336   
112    32     
32     -592   
-64    -64    
160    -1584  
128    64     
-96    -48    
112    32     
-112   -32    
-96    -48    
-128   128    
160    0      
-32    96     
-80    0      
96     -64    
64     -96    
0      80     
-48    -112   
48     -48    
-160   32     
96     0      
-160   128    
-64    96     
-192   64     
32     0      
-112   -304   
-256   -496   
144    144    
-144   112    
32     -48    
-16    -272   
304    64     
0      -48    
-176   64     
-256   -96    
-912   -80    
-16    96     
-128   128    
-144   -96    
64     -32    
-32    64     
176    32     
-320   -64    
144    -80    
128    -48    
-368   64     
240    288    
-384   -96    
-112   -32    
160    80     
16     80     
-112   16     
64     48     
-192   -64    
-672   -48    
-208   -128   
224    -48    
80     -160   
-64    -432   
256    16     
-544   48     
16     48     
-528   -208   
-240   32     
80     80     
-272   96     
-48    -192   
-144   160    
160    0      
-704   -96    
-64    -48    
208    64     
32     96     
-128   64     
16     112    
-400   -560   
16     -176   
144    -80    
-112   128    
192    96     
-368   -176   
-16    -16    
-400   48     
-112   16     
-160   80     
-256   16     
-1552  -96    
-64    32     
-192   -272   
240    176    
-176   -112   
144    32     
-32    80     
160    112    
-192   96     
64     32     
-64    -16    
128    48     
-176   -32    
-32    -32    
-48    -32    
-384   -16    
-64    80     
-80    0      
32     240    
144    112    
-240   0      
32     64     
-16    16     
48     48     
-224   -16    
32     16     
96     48     
160    80     
-240   -32    
-112   0      
-256   32     
0      112    
-1504  -48    
-96    -48    
16     -112   
112    64     
-96    32     
-32    32     
160    80     
96     80     
-160   -32    
-80    -16    
16     80     
-160   0      
-176   -336   
-16    -64    
-64    176    
-128   -160   
-160   0      
192    -16    
208    176    
-96    0      
112    112    
48     64     
-32    16     
48     32     
-32    96     
32     112    
208    336    
-64    -272   
-288   -400   
144    -144   
-256   -48    
144    -16    
-80    -160   
208    272    
-80    160    
-16    144    
-16    48     
0      144    
-144   368    
32     -128   
128    448    
-144   -80    
-96    -128   
-64    -32    
0      112    
-272   80     
-160   176    
96     80     
-272   -112   
32     -272   
-64    624    
80     -208   
-80    128    
-48    160    
-112   -112   
-16    32     
-304   -144   
192    256    
-448   -224   
-192   -560   
0      112    
256    1152   
32     528    
-288   -432   
80     -304   
48     240    
16     80     
80     64     
16     192    
64     144    
-48    368    
-64    -112   
48     16     
-80    48     
32     112    
48     64     
-112   32     
96     80     
-128   -144   
80     32     
-80    208    
128    144    
-80    80     
16     32     
-144   48     
-128   -304   
256    -480   
-64    -80    
112    128    
64     416    
864    1024   
-544   736    
48     32     
48     256    
96     208    
-336   -48    
48     -240   
-16    -224   
-80    32     
208    -64    
16     336    
256    272    
-16    352    
160    112    
48     144    
16     32     
48     144    
352    464    
-144   96     
-224   -384   
16     -400   
160    0      
240    528    
16     480    
-80    544    
320    336    
-144   320    
240    208    
-576   -544   
176    -144   
208    304    
160    320    
352    224    
80     224    
304    576    
128    352    
-288   -144   
32     -336   
-112   -144   
128    0      
16     112    
192    528    
64     496    
128    144    
-64    -1056  
32     -96    
-96    288    
-128   16     
-176   -64    
32     176    
-112   -880   
400    352    
-32    48     
96     256    
-96    -32    
224    48     
-96    400    
-64    -608   
-192   160    
48     -1184  
256    336    
-16    224    
16     0      
32     -96    
144    32     
112    96     
144    192    
-112   192    
48     -464   
432    400    
-96    256    
96     144    
80     -176   
112    64     
-64    -128   
0      16     
192    80     
160    384    
112    112    
-112   -208   
176    80     
-32    16     
224    48     
0      240    
64     -48    
176    -64    
-256   272    
96     -64    
-256   80     
256    -192   
-32    304    
240    -1904  
-192   208    
176    128    
304    160    
-304   -256   
192    -96    
-48    -192   
80     -48    
-144   0      
80     80     
32     688    
16     240    
-176   160    
96     -304   
16     -16    
32     -496   
-48    -64    
288    -352   
16     -64    
128    -80    
-16    64     
176    16     
-32    80     
32     160    
128    96     
-80    112    
208    320    
96     208    
96     80     
176    80     
-48    -96    
16     240    
128    -48    
64     224    
0      64     
112    112    
48     320    
-224   144    
208    -64    
-16    -32    
256    48     
-80    -112   
128    224    
-16    -48    
-16    64     
80     -144   
112    224    
-128   -384   
208    160    
-176   -144   
112    192    
144    16     
0      -32    
0      32     
224    -368   
-224   160    
48     -160   
48     112    
-80    -464   
32     -80    
224    16     
-64    80     
160    -480   
-16    96     
96     192    
-80    128    
48     64     
80     32     
32     96     
112    -16    
128    80     
48     -16    
48     0      
128    0      
64     112    
48     -112   
-32    128    
176    96     
128    32     
-144   48     
224    -832   
-64    16     
144    -1248  
16     -880   
192    -48    
-64    -176   
80     -192   
96     96     
-80    -128   
144    176    
128    -48    
-32    80     
112    -64    
-48    -272   
144    432    
96     -1216  
-192   -608   
-176   -304   
128    128    
160    368    
176    16     
-96    -32    
160    -144   
-32    -144   
64     64     
32     64     
240    112    
-224   -48    
272    -256   
-80    48     
16     -320   
-48    64     
80     48     
80     -64    
16     -32    
112    -176   
-176   -128   
192    -368   
96     48     
-48    64     
32     16     
-80    112    
32     -144   
-32    -416   
64     -352   
48     -32    
128    48     
288    368    
-624   -144   
272    -64    
-96    80     
-144   -160   
-32    -208   
16     0      
128    -1344  
-32    -112   
160    -256   
-160   16     
192    528    
224    112    
96     -64    
224    32     
-192   -48    
-128   16     
-272   -96    
176    112    
96     32     
0      -112   
256    80     
-192   -288   
64     32     
-48    -16    
96     48     
240    160    
-176   160    
-240   -128   
256    -80    
-544   -16    
656    -64    
-576   160    
272    -176   
-928   0      
272    -48    
-576   -48    
224    -176   
-320   160    
448    -224   
-208   240    
-160   0      
48     64     
-208   -16    
336    -208   
-128   80     
96     -80    
-416   -80    
112    -144   
-592   -96    
160    -224   
-752   -64    
288    -16    
-112   48     
112    -304   
80     96     
-96    -208   
224    16     
32     176    
16     32     
-96    128    
48     -80    
-96    16     
144    -32    
-128   -16    
192    -16    
-128   -64    
0      -304   
112    160    
-48    -304   
0      80     
144    -880   
0      16     
-96    96     
-96    -144   
-80    -64    
16     64     
48     160    
-112   224    
112    176    
-96    -64    
16     48     
128    -128   
48     112    
96     -64    
-64    112    
-32    112    
-48    -176   
-464   -592   
0      -336   
-64    -336   
-48    -432   
-16    32     
128    224    
-128   128    
96     -320   
-720   -352   
352    -224   
128    704    
-752   -64    
80     16     
-416   -672   
-160   304    
-208   64     
32     -320   
-192   -16    
192    112    
-288   0      
-144   -80    
112    -32    
-704   0      
-32    32     
-272   -48    
80     112    
-288   -96    
-160   -64    
80     368    
-320   -144   
208    32     
192    672    
-320   -272   
-848   192    
-48    -192   
112    -16    
96     128    
-32    -400   
32     544    
32     -272   
-16    144    
-48    -192   
-176   32     
112    272    
32     112    
-16    64     
-80    224    
-112   96     
-1264  -208   
-96    208    
0      96     
-32    96     
-320   -128   
112    -176   
-288   -144   
144    -112   
0      112    
128    400    
32     192    
-128   -48    
32     -80    
-16    928    
0      704    
-176   128    
96     128    
-464   160    
32     128    
-160   -128   
-32    48     
0      -80    
64     96     
160    128    
-96    -16    
192    176    
-416   32     
96     64     
-192   16     
80     32     
-64    112    
208    64     
-1088  240    
-80    -16    
-256   -544   
0      -208   
-48    -64    
-16    -224   
-192   0      
-160   -48    
48     -128   
-112   16     
784    448    
-1008  -128   
-16    -512   
-288   -16    
16     -80    
-448   -144   
48     48     
-304   -144   
-80    -176   
-48    112    
-192   256    
-16    688    
-240   80     
-128   -208   
96     -128   
-160   144    
-112   192    
272    384    
-544   368    
-224   48     
80     -480   
-80    -464   
-208   624    
-96    384    
0      -160   
-288   -112   
-128   96     
144    -32    
112    48     
-112   -48    
-224   -288   
32     -320   
304    496    
-176   192    
16     32     
-32    0      
80     576    
-304   -848   
528    96     
0      384    
192    608    
-144   -64    
-176   -304   
128    -720   
-80    224    
160    48     
-240   0      
0      176    
16     144    
-208   -32    
-80    -288   
176    320    
-688   16     
64     112    
-48    -64    
-176   -400   
176    -240   
-96    -96    
144    -64    
112    -32    
256    304    
192    416    
-224   80     
96     80     
48     80     
0      64     
32     192    
48     240    
-80    368    
-16    80     
-128   0      
0      96     
416    304    
-320   160    
160    112    
-336   48     
32     48     
-48    272    
-16    16     
-16    0      
32     -16    
96     -64    
-64    112    
32     112    
-48    112    
-16    0      
0      144    
144    144    
-144   -80    
16     0      
288    -48    
-528   64     
16     32     
-272   -80    
80     0      
-208   -48    
0      -208   
96     112    
144    128    
48     112    
112    176    
144    16     
112    160    
-48    32     
0      0      
32     -32    
48     80     
240    144    
-32    32     
0      32     
-96    16     
0      -192   
-128   32     
96     80     
0      112    
32     80     
80     128    
16     112    
-16    160    
48     64     
96     96     
48     320    
64     64     
-176   -16    
224    176    
-16    144    
0      112    
48     96     
336    192    
-304   16     
128    16     
32     -16    
32     96     
-16    64     
64     80     
16     96     
0      32     
-16    144    
-16    -128   
128    48     
0      64     
32     -1232  
160    96     
0      128    
80     64     
-144   80     
-32    0      
208    -16    
16     48     
-32    -32    
-80    32     
16     16     
-48    128    
64     144    
0      -128   
32     80     
144    -272   
-128   208    
-32    80     
96     0      
96     16     
-16    32     
112    16     
48     64     
-160   32     
96     144    
32     16     
-16    48     
-32    0      
96     -320   
-256   -352   
304    -1088  
-176   176    
-64    64     
-64    64     
224    80     
-128   144    
-96    -16    
80     80     
176    112    
-16    48     
-208   16     
336    112    
-176   80     
16     -80    
16     144    
32     -160   
-80    16     
208    -1632  
-32    32     
112    -48    
32     80     
-64    -16    
128    80     
160    64     
-32    144    
-112   0      
-16    80     
256    96     
-208   -96    
320    32     
-128   -192   
112    -16    
80     -480   
-64    144    
-32    -192   
-16    32     
16     -112   
128    144    
0      -32    
-144   32     
192    64     
-96    -48    
256    48     
0      -16    
144    96     
-112   -208   
144    80     
0      -240   
112    -48    
112    -528   
80     336    
-32    80     
48     -32    
48     64     
128    176    
0      48     
-32    16     
224    96     
-80    -160   
16     -384   
-112   -752   
288    144    
-48    48     
-48    48     
-32    -512   
144    -64    
-32    32     
96     80     
64     96     
112    128    
48     48     
96     -576   
160    144    
64     -96    
32     96     
224    112    
-48    -48    
16     64     
144    352    
-208   -368   
144    64     
128    176    
-112   48     
-128   0      
368    128    
-80    128    
448    -64    
-352   128    
432    48     
48     80     
64     0      
-80    144    
224    96     
384    176    
-160   -112   
-32    176    
-16    -160   
128    -1248  
64     48     
48     -80    
-32    -544   
-16    32     
64     -96    
112    -48    
32     16     
32     -336   
48     128    
288    16     
-128   128    
192    -32    
-16    -128   
64     80     
48     -176   
-16    144    
-16    64     
-112   -768   
0      160    
-48    -736   
112    -320   
96     -528   
32     32     
192    352    
32     320    
112    -80    
-288   -432   
112    -384   
96     400    
-16    32     
-144   0      
-128   -32    
80     192    
0      -160   
-16    0      
96     -176   
96     -384   
48     -32    
0      -592   
32     96     
64     -528   
-272   384    
0      -288   
48     80     
-32    128    
-144   -320   
192    -112   
-112   368    
-176   -48    
32     -224   
128    64     
-48    32     
112    -272   
-48    -208   
80     -96    
16     -272   
80     128    
0      -112   
32     32     
-32    48     
64     -96    
-128   -16    
64     -32    
-32    16     
32     -48    
80     48     
32     -48    
160    112    
0      -112   
80     -48    
0      -672   
160    64     
16     16     
32     0      
-48    -128   
48     -32    
-80    128    
48     -48    
-272   32     
0      80     
-352   0      
-160   -432   
112    -32    
0      -272   
64     48     
-64    -128   
-80    48     
-160   -336   
144    -160   
-240   -32    
416    -160   
-160   240    
448    176    
-320   64     
160    80     
-544   -192   
48     -64    
64     -144   
-80    -160   
768    736    
-400   96     
144    240    
-128   336    
224    224    
-64    80     
80     -144   
-240   16     
144    -176   
-112   48     
208    16     
-112   -16    
112    112    
16     -16    
64     -240   
128    80     
-48    -416   
160    64     
-240   96     
48     -352   
112    -48    
0      -608   
-320   -192   
208    -80    
-160   -64    
256    112    
-224   -48    
32     -48    
96     32     
192    -32    
416    1120   
-48    528    
0      -864   
224    -272   
224    288    
-144   208    
208    64     
-192   144    
-80    -192   
288    -16    
-240   -368   
16     -160   
-80    32     
336    112    
-176   -384   
384    192    
-256   272    
-832   -224   
80     48     
-400   128    
144    176    
0      384    
-64    16     
-16    -176   
-80    64     
16     48     
16     160    
-144   -80    
-64    96     
-96    -320   
288    0      
-320   -48    
-224   144    
-144   48     
-96    16     
224    128    
-400   -208   
-64    -240   
-2000  -128   
-128   -304   
-32    0      
96     144    
304    384    
-16    112    
-240   -368   
112    48     
-16    16     
-208   -208   
224    112    
-96    0      
-288   -160   
80     -176   
-272   16     
208    96     
-272   32     
64     -208   
48     160    
-48    -112   
16     16     
-288   -144   
368    160    
-48    16     
112    -48    
32     112    
-96    0      
-80    0      
-48    48     
32     48     
-272   -32    
112    80     
-928   -48    
-112   -112   
0      -80    
-16    32     
-80    -32    
32     -48    
208    160    
-80    48     
-80    64     
32     64     
0      208    
-272   -64    
96     144    
0      16     
32     16     
-720   -160   
304    80     
-288   -64    
80     48     
-96    -32    
128    272    
-16    -16    
32     16     
96     128    
-32    -16    
16     -96    
160    48     
-16    112    
-48    160    
-48    32     
-144   -80    
128    96     
32     -64    
144    48     
80     64     
0      32     
48     48     
-112   -112   
16     48     
128    64     
-160   -80    
-160   -16    
-32    16     
-80    -32    
0      112    
112    16     
-112   -32    
-704   -192   
256    240    
-288   16     
192    48     
-144   32     
128    160    
32     144    
-128   32     
-80    -192   
16     -16    
208    160    
-240   -32    
128    48     
-160   -32    
96     80     
-608   -144   
-64    64     
336    288    
-368   240    
128    80     
-128   96     
240    48     
-336   -64    
208    0      
0      0      
-48    80     
80     144    
-160   80     
96     160    
-176   96     
-272   -16    
-16    -16    
112    -32    
-80    48     
64     16     
-96    80     
-80    -64    
-48    32     
48     16     
176    48     
80     96     
-192   -64    
32     112    
-80    32     
32     48     
16     80     
-112   16     
64     80     
32     96     
-64    64     
0      96     
0      -16    
144    -112   
176    240    
-208   -48    
-64    96     
-112   -48    
80     16     
-48    -32    
-16    64     
64     128    
192    96     
-256   16     
96     144    
-16    64     
128    80     
16     96     
240    208    
-240   48     
-48    16     
-96    0      
352    64     
-208   192    
160    48     
16     0      
48     48     
48     128    
32     288    
80     224    
64     304    
96     224    
-32    -48    
-176   -32    
240    -16    
-80    32     
160    128    
48     176    
-48    -80    
32     -240   
-16    -80    
336    96     
-176   48     
224    48     
-32    80     
160    80     
-128   0      
48     0      
-96    -48    
224    -176   
-32    -48    
128    16     
-48    160    
-64    16     
64     64     
112    144    
-48    64     
0      16     
64     208    
32     0      
16     0      
96     32     
176    64     
-480   -704   
144    -192   
0      -144   
128    -656   
48     -160   
432    496    
64     160    
-128   192    
128    32     
-208   -208   
224    -160   
-64    64     
176    96     
-112   144    
128    112    
-128   64     
-64    128    
160    -128   
160    256    
48     64     
-288   -688   
48     -128   
240    -2352  
-176   176    
208    288    
-336   192    
-32    32     
-176   144    
0      -16    
160    192    
288    304    
-208   256    
-112   224    
192    176    
272    96     
-128   -256   
384    -32    
16     -528   
-192   -528   
32     320    
112    384    
-112   192    
32     160    
-32    -112   
-32    -16    
-32    -112   
0      -112   
240    304    
-240   64     
128    -128   
-32    -16    
48     -144   
160    -144   
0      224    
96     -1088  
128    576    
-48    96     
192    240    
48     80     
80     64     
-16    48     
80     96     
-16    16     
64     80     
176    144    
-304   -64    
288    -272   
176    560    
336    480    
-400   -592   
64     -192   
96     -1456  
64     272    
32     -32    
-16    160    
128    272    
128    208    
-192   64     
224    -80    
-256   -368   
240    48     
-48    352    
96     -304   
64     144    
-16    -320   
16     48     
-16    -320   
32     144    
144    560    
192    16     
-224   -48    
144    -48    
-192   112    
160    96     
64     112    
80     -304   
32     128    
-48    -288   
-16    64     
144    32     
32     144    
16     -160   
48     80     
16     0      
48     144    
-320   -160   
496    -176   
-128   160    
256    -16    
64     416    
64     224    
48     48     
-64    -160   
160    -80    
-48    -256   
160    384    
96     -1856  
-128   112    
240    96     
-80    240    
64     128    
0      96     
32     -48    
48     -128   
32     80     
-48    -272   
48     128    
64     -112   
-80    -144   
16     -672   
304    48     
160    272    
96     240    
128    160    
0      -1456  
0      -96    
-224   -368   
32     -1664  
-544   -1312  
80     -1392  
-64    -608   
96     -368   
192    64     
64     304    
112    160    
48     80     
96     -32    
80     -16    
48     48     
128    -256   
-192   -384   
-160   784    
0      -192   
-16    -144   
-16    -64    
208    -176   
-144   -1248  
640    800    
-464   288    
416    -720   
208    512    
64     176    
-32    -416   
-16    -240   
-64    -320   
208    144    
-224   -128   
160    -64    
144    -400   
16     320    
112    32     
32     -432   
48     96     
48     336    
-64    -16    
48     160    
96     144    
-48    -240   
-80    -96    
0      112    
208    0      
64     -176   
48     -272   
-432   112    
-48    -144   
-64    -16    
48     -288   
80     -64    
0      -176   
-16    240    
16     176    
48     32     
128    -16    
272    272    
-336   80     
32     0      
-144   -144   
96     -272   
-80    544    
-48    288    
-144   272    
48     -80    
192    -192   
160    -784   
-208   16     
128    112    
32     160    
16     32     
128    -208   
-176   80     
224    64     
-176   -48    
16     -48    
16     32     
128    112    
-560   0      
80     -112   
48     -16    
-32    -320   
400    208    
112    -176   
-16    80     
48     -160   
128    -144   
-80    48     
-128   -288   
592    -176   
-480   176    
480    -208   
-352   0      
272    128    
-64    -32    
80     112    
-32    -144   
-48    -48    
-48    -288   
192    272    
-64    -48    
224    -112   
-240   0      
288    160    
-64    96     
-16    -16    
-544   48     
-32    48     
-272   32     
-16    -80    
-48    -32    
-32    -416   
48     0      
32     -512   
128    64     
96     160    
-64    64     
80     80     
-128   128    
-192   -96    
48     96     
-80    -80    
-64    -16    
32     48     
0      -32    
32     64     
112    -144   
-80    112    
176    0      
16     -160   
-16    -80    
192    -160   
-192   32     
112    -96    
96     16     
96     32     
64     80     
112    -48    
-272   -16    
192    -16    
-208   80     
-128   80     
32     -16    
-160   -96    
-1040  0      
-144   -32    
-640   -48    
-32    0      
-976   -32    
96     144    
-144   -128   
96     32     
80     160    
-32    -64    
-816   -192   
112    -48    
-240   -128   
160    96     
-80    112    
0      80     
-32    80     
-64    320    
64     64     
-112   -32    
112    128    
-688   144    
-304   80     
224    80     
-208   32     
-48    -48    
112    64     
-112   -144   
-192   112    
176    96     
0      -32    
128    176    
0      192    
112    128    
-224   16     
-80    -16    
-928   -80    
160    128    
-256   80     
-16    128    
96     -112   
-96    -16    
0      -144   
-176   -16    
-48    32     
112    -16    
0      -144   
-160   -48    
-48    16     
-336   -16    
0      80     
-144   32     
-16    160    
-1328  -32    
16     64     
-80    -176   
-32    128    
80     -32    
48     112    
-128   80     
-32    -48    
-96    -16    
48     -32    
-208   48     
160    -32    
-64    48     
192    64     
-160   80     
-32    -32    
0      96     
-64    -112   
48     80     
-16    304    
80     96     
-16    80     
-96    0      
-176   160    
-144   0      
176    0      
-112   64     
112    80     
-384   -224   
16     -144   
-288   -176   
-176   -128   
608    64     
-64    208    
-80    -64    
144    -240   
-64    -496   
112    -512   
-176   -32    
176    -96    
-96    -176   
176    160    
-224   0      
224    -32    
-288   336    
-96    -128   
-32    160    
-416   -80    
16     -16    
16     -16    
80     0      
-48    112    
64     112    
80     144    
-224   320    
0      480    
-96    128    
64     208    
-64    80     
48     112    
-64    16     
96     128    
-48    272    
-16    96     
64     80     
160    64     
-48    -224   
64     0      
-64    -432   
-160   -192   
368    416    
-272   224    
320    128    
-272   -464   
304    96     
-160   -16    
144    128    
16     48     
-160   0      
112    64     
-64    240    
112    -176   
-192   0      
-32    -48    
-96    112    
-48    192    
80     -96    
176    128    
-368   0      
64     112    
-48    -80    
32     256    
-128   160    
144    -160   
-32    144    
-32    352    
32     -192   
-112   -16    
48     192    
32     384    
224    240    
-320   -112   
192    -288   
-336   304    
480    -80    
-16    128    
-128   -32    
208    -272   
400    512    
-96    352    
-256   -352   
32     -176   
544    480    
-176   416    
-80    416    
368    -192   
-352   0      
32     -112   
32     0      
208    160    
-64    16     
16     16     
144    64     
-192   96     
128    32     
48     80     
-48    -16    
240    0      
-128   224    
-96    192    
112    -384   
-96    272    
384    -176   
-352   -512   
112    272    
288    176    
112    816    
112    256    
32     96     
80     448    
64     -80    
-48    -64    
112    64     
-64    96     
112    32     
16     48     
32     16     
128    80     
-80    160    
128    176    
-96    80     
0      -320   
192    32     
64     32     
64     -160   
16     80     
224    -80    
-16    160    
16     64     
32     48     
-96    96     
96     32     
64     80     
-128   16     
0      -512   
48     96     
48     -64    
80     112    
240    128    
-176   544    
112    -240   
160    592    
-176   560    
-48    -240   
64     -224   
32     288    
-48    -160   
64     64     
112    224    
-48    -96    
-16    80     
80     -2400  
32     96     
-80    176    
-32    -624   
288    480    
288    464    
-432   -432   
288    320    
-96    112    
-96    128    
240    -48    
-64    64     
80     176    
64     -416   
-16    256    
-48    -544   
-32    -320   
320    -96    
-224   -272   
16     -400   
0      144    
-80    304    
32     -400   
-128   -48    
48     272    
-112   -112   
16     128    
160    64     
144    -128   
-112   112    
-48    -320   
144    32     
560    -1104  
-368   64     
64     -128   
0      -416   
96     -176   
-32    96     
64     208    
-144   -96    
-16    -64    
352    128    
-304   -48    
64     -160   
144    80     
32     -144   
208    -96    
32     -240   
272    256    
-80    -960   
-160   -288   
144    -160   
160    160    
48     -112   
176    64     
32     64     
48     96     
-48    64     
-16    0      
80     -48    
-96    -48    
256    160    
-64    -256   
160    -32    
224    -32    
64     48     
-32    -176   
192    -208   
32     -176   
160    160    
-80    -16    
432    176    
-480   208    
368    16     
-304   128    
240    -480   
-80    112    
32     -80    
192    32     
-192   -144   
320    80     
160    288    
-384   352    
64     48     
-336   96     
256    16     
-80    32     
144    304    
48     -176   
208    16     
192    80     
0      -64    
96     -112   
16     -64    
32     -1440  
192    240    
16     208    
48     208    
-112   32     
176    0      
-80    -256   
192    112    
-128   -16    
160    -48    
48     80     
64     64     
80     128    
-32    -16    
224    112    
-208   160    
352    -800   
80     80     
144    80     
128    64     
-144   -224   
192    -592   
16     -192   
48     -528   
176    -368   
144    256    
192    80     
64     144    
112    -224   
48     -192   
32     48     
96     -304   
-16    -32    
64     -512   
-112   -416   
-512   -352   
256    -80    
-48    -96    
272    112    
-112   -80    
176    -448   
128    -176   
256    176    
-112   48     
144    0      
176    112    
176    -96    
32     -48    
144    -192   
64     -80    
-48    48     
208    48     
-112   -32    
112    -384   
64     -96    
80     -336   
48     0      
0      160    
64     32     
-64    -32    
64     80     
0      -96    
176    192    
-176   16     
-32    -16    
80     -64    
64     -256   
-1472  32     
160    -224   
-16    16     
160    -128   
-96    16     
176    -688   
-544   -48    
288    -256   
-208   16     
208    -32    
-80    96     
144    16     
-16    -64    
-256   -64    
-32    -128   
-208   -16    
240    96     
-48    -48    
-80    -240   
-64    -464   
64     -320   
80     64     
-64    -736   
176    112    
96     192    
256    160    
-192   32     
112    -240   
-16    -16    
-80    -304   
128    -32    
32     -80    
-288   32     
112    -64    
-64    -64    
112    -208   
176    48     
-48    -496   
0      112    
224    80     
0      -32    
-96    -64    
128    -112   
-96    -48    
32     -16    
-384   -16    
0      -112   
-240   -64    
-16    0      
-32    64     
80     -96    
96     64     
32     -512   
64     96     
-256   48     
80     32     
192    -96    
112    -16    
-160   16     
96     16     
-112   -192   
-80    -64    
240    -16    
16     -16    
16     -192   
96     -288   
-64    64     
208    -528   
128    272    
-96    160    
112    256    
-80    80     
48     32     
-112   -64    
48     336    
160    224    
-32    32     
48     -96    
-224   -16    
288    384    
-176   -336   
-32    -240   
32     -192   
32     64     
16     112    
-176   -112   
-208   64     
-32    -384   
-160   256    
-48    -352   
208    128    
-176   416    
-112   -352   
-400   -336   
224    128    
-976   160    
32     192    
-112   0      
-208   400    
-96    96     
-688   -256   
-80    16     
-448   48     
32     -64    
48     -96    
-336   224    
64     64     
-160   -80    
-128   224    
-16    384    
-160   -80    
0      16     
64     -48    
-400   -288   
-32    -16    
-112   48     
16     288    
256    304    
-208   96     
-1728  64     
-112   -112   
-80    64     
-224   64     
-32    -176   
-32    192    
-64    -272   
192    336    
16     -32    
-432   -720   
64     144    
16     336    
64     304    
-352   144    
-144   -320   
-368   -192   
96     288    
176    160    
32     64     
784    400    
-352   1056   
-208   -560   
-112   -352   
192    -16    
-16    144    
-384   -48    
224    -64    
-576   -240   
96     -432   
96     320    
48     336    
-96    -192   
-704   -64    
160    64     
-96    0      
160    -16    
-16    -416   
-160   384    
96     -448   
-112   256    
-112   -192   
304    -320   
-224   848    
-128   -352   
0      -80    
-48    304    
112    -320   
-480   304    
-224   -624   
544    96     
64     576    
-32    -160   
336    -32    
-112   288    
16     96     
32     16     
48     96     
-16    0      
-64    80     
48     48     
-144   -16    
-64    -16    
-352   -48    
304    352    
-464   -80    
-48    -528   
64     16     
-64    -192   
160    80     
-16    -208   
80     80     
32     160    
-32    -112   
160    208    
-80    144    
-352   -288   
160    192    
-48    96     
-144   -304   
-128   -352   
320    96     
-304   -16    
128    160    
-80    -208   
224    48     
208    560    
-224   112    
-208   -320   
144    -256   
-176   128    
-192   -208   
-32    496    
128    -144   
112    480    
-144   224    
48     -64    
-64    112    
-32    0      
112    64     
-32    48     
-16    32     
-64    16     
48     16     
-80    32     
48     256    
16     272    
-208   -112   
-336   -528   
368    224    
-176   624    
16     -96    
-80    -48    
128    80     
176    512    
-224   64     
-48    -256   
-16    80     
96     160    
64     16     
-48    208    
-16    -176   
144    -208   
-160   -304   
32     -272   
64     16     
96     112    
-112   272    
144    352    
48     192    
-128   96     
32     256    
96     48     
-16    96     
-208   80     
144    192    
-144   112    
-160   480    
-16    288    
-320   176    
320    -144   
128    96     
-80    -16    
-128   -48    
16     -16    
0      0      
-112   0      
-16    32     
32     48     
-192   -176   
64     112    
-32    16     
-48    96     
-64    0      
240    48     
-144   96     
-32    96     
-144   16     
128    0      
0      -48    
240    272    
-96    224    
-48    112    
-48    80     
-16    32     
96     144    
416    448    
-496   400    
112    32     
-352   -128   
304    -80    
32     -16    
80     144    
16     112    
-16    96     
-48    0      
16     0      
-128   -48    
112    96     
-80    32     
0      0      
-128   32     
16     -288   
64     48     
80     64     
32     32     
128    48     
48     96     
-32    -48    
64     96     
-32    0      
-32    80     
192    128    
48     160    
-16    0      
160    176    
-112   32     
48     -128   
-48    80     
192    192    
-80    80     
-208   320    
352    144    
-112   176    
352    240    
-160   240    
32     -384   
-48    -64    
144    320    
-288   -128   
-80    -128   
128    144    
-48    80     
176    240    
32     -1296  
96     48     
-176   -80    
192    -80    
-144   32     
64     0      
176    384    
256    208    
144    16     
16     -32    
-240   -80    
160    112    
176    160    
-96    -176   
128    112    
48     32     
-496   208    
128    64     
48     288    
144    208    
-160   80     
-176   -128   
48     0      
-96    -192   
112    112    
-272   -192   
176    -368   
-32    32     
336    -224   
-208   80     
240    -224   
32     -80    
160    -1360  
144    112    
-80    -64    
64     96     
80     112    
96     80     
-32    16     
192    112    
16     128    
-32    64     
144    96     
112    48     
-192   144    
144    16     
-64    64     
32     -496   
96     80     
0      -352   
-80    64     
0      80     
96     80     
16     -112   
224    320    
-224   160    
64     -112   
16     80     
64     -112   
96     96     
-96    -720   
160    160    
-16    -1248  
80     96     
80     -32    
192    240    
80     80     
-112   80     
160    112    
-112   48     
176    64     
64     64     
96     96     
64     -608   
-144   16     
304    -64    
-96    176    
48     32     
-160   -16    
128    -16    
64     96     
-64    128    
64     224    
80     -80    
32     -64    
192    240    
-80    -96    
176    80     
-32    -144   
224    192    
-272   160    
-144   0      
-48    -160   
304    176    
96     -240   
64     144    
16     -64    
48     112    
32     -224   
-48    -16    
336    -2544  
-144   -112   
-48    -80    
0      -208   
96     -80    
32     -384   
96     -80    
-48    -176   
80     80     
32     128    
48     -1104  
32     -256   
32     -672   
144    -416   
80     -240   
160    -32    
48     32     
32     -544   
112    -176   
0      -912   
96     16     
-176   -304   
-16    -48    
160    -432   
-16    128    
64     32     
128    -112   
48     192    
272    -416   
-704   80     
80     -480   
16     64     
32     -272   
0      96     
16     -1248  
128    -160   
-80    -48    
128    0      
16     -32    
-64    112    
48     0      
32     80     
-288   -32    
160    -112   
-656   64     
368    -608   
32     272    
112    -192   
-16    -256   
128    -432   
144    16     
-16    -208   
32     -112   
128    -752   
0      304    
112    208    
-96    -304   
-160   -304   
32     -80    
-240   176    
48     64     
-496   288    
-64    112    
-128   272    
176    -384   
-16    -224   
464    -32    
-224   272    
272    -176   
496    400    
-80    288    
80     16     
-16    208    
400    16     
-496   -144   
-176   -944   
224    -144   
-144   -32    
-16    -176   
288    144    
48     160    
-80    -256   
384    128    
-272   -448   
112    128    
-208   16     
320    -304   
0      16     
144    -256   
-16    -80    
0      -32    
-96    -208   
128    -128   
224    560    
-192   352    
32     32     
-224   -432   
160    -80    
-16    -864   
-32    -32    
-96    -160   
-48    32     
-96    208    
-16    48     
-512   -560   
528    -480   
-112   448    
-144   592    
-512   -336   
80     -272   
-48    48     
160    -384   
512    608    
-224   -1120  
-32    -480   
-112   336    
256    -288   
160    224    
48     0      
-48    48     
240    368    
-32    352    
-64    -528   
144    -208   
288    128    
-16    272    
256    -80    
-32    -176   
144    -144   
0      -576   
176    160    
-32    -192   
48     32     
-80    -48    
-128   -80    
80     -32    
-176   64     
112    48     
-16    432    
-176   -96    
128    464    
64     -528   
-144   96     
-112   0      
-96    0      
16     320    
-192   336    
-48    64     
48     128    
-64    512    
-32    -176   
-208   -208   
144    192    
-320   -128   
-1632  -256   
176    336    
-1152  -160   
224    -64    
-32    400    
-64    192    
-48    240    
-336   -96    
-256   -624   
-416   80     
128    464    
-32    176    
64     16     
-64    -192   
-144   -240   
-96    240    
48     320    
-112   -288   
32     -48    
-64    64     
-128   352    
-240   96     
-80    -64    
192    64     
-368   80     
-96    48     
-2304  -112   
-272   -64    
0      -160   
-144   144    
-112   16     
-64    -64    
-16    -272   
-128   -80    
0      0      
128    -16    
-112   -64    
96     48     
48     -224   
-288   -48    
-160   -48    
-576   192    
-48    0      
0      16     
144    160    
-32    16     
16     16     
-48    -272   
-64    -112   
-48    80     
0      48     
-48    48     
-64    48     
-160   -80    
-80    32     
112    0      
-352   -32    
-16    0      
-1040  -48    
0      -80    
-48    -160   
48     48     
-112   64     
96     32     
-64    128    
32     48     
-96    80     
16     48     
-16    80     
-80    272    
128    160    
-240   -32    
64     32     
-688   -16    
0      128    
0      -32    
128    208    
0      0      
-48    80     
144    -16    
-48    96     
-48    16     
-96    0      
48     48     
80     64     
-64    80     
208    336    
16     432    
-96    -16    
0      -352   
160    -256   
32     64     
-224   -80    
96     -32    
-48    80     
224    272    
-368   192    
-32    -224   
32     48     
32     176    
-256   176    
-400   -112   
-16    -16    
-256   32     
32     432    
-144   256    
-272   288    
144    16     
-160   64     
0      112    
48     48     
-128   16     
192    -16    
-64    80     
48     -176   
-176   32     
32     64     
0      96     
-400   -240   
208    -208   
160    192    
64     16     
-128   32     
160    96     
-48    128    
0      32     
-64    160    
64     -48    
-96    96     
160    480    
192    -16    
0      80     
224    176    
-144   -96    
64     128    
112    80     
16     96     
0      48     
-80    32     
96     -16    
-112   -224   
192    144    
80     80     
80     48     
144    112    
144    480    
-416   -80    
352    320    
-432   -144   
0      -16    
32     96     
32     16     
-128   -96    
272    112    
-144   32     
352    160    
-272   64     
304    128    
48     96     
-448   16     
176    96     
-224   -16    
224    96     
-176   -32    
-128   -64    
112    -80    
-16    -16    
32     48     
256    320    
-272   224    
64     240    
-32    80     
32     64     
-32    80     
-304   32     
224    -32    
-96    -16    
240    160    
-128   -32    
-48    32     
48     80     
-32    64     
112    144    
0      80     
160    160    
-48    96     
320    144    
-240   -16    
192    48     
-80    96     
128    112    
0      0      
16     48     
-96    96     
32     112    
96     144    
-48    -96    
16     -96    
224    192    
16     208    
-224   -64    
-16    0      
160    16     
80     96     
-48    -64    
-80    144    
-32    112    
16     -976   
112    96     
-48    -192   
-48    128    
208    560    
16     256    
-128   -32    
-48    -160   
48     -32    
192    176    
48     -112   
-48    144    
80     208    
16     224    
-224   32     
-64    -176   
80     128    
32     64     
80     48     
96     64     
64     80     
-48    48     
80     80     
48     64     
64     96     
-80    96     
288    480    
128    16     
-320   -272   
160    272    
-16    -80    
-208   -96    
16     -3424  
144    480    
-128   -32    
-32    -144   
32     32     
112    16     
0      0      
256    16     
-80    -320   
128    272    
-80    32     
160    0      
48     176    
144    -32    
64     80     
80     -784   
-48    112    
80     32     
-176   -112   
208    240    
-48    -112   
-160   -240   
128    160    
-80    -48    
80     96     
-112   48     
96     -112   
16     -112   
160    416    
128    432    
-96    -112   
-16    64     
16     -848   
-32    80     
16     -96    
16     80     
32     -32    
0      80     
112    48     
32     112    
80     16     
-48    -160   
64     96     
32     -48    
48     96     
-32    -240   
-48    -96    
96     32     
160    144    
48     -80    
-32    208    
0      -144   
128    -32    
32     96     
112    96     
-144   16     
48     0      
-144   16     
64     -336   
-96    -176   
-144   -128   
128    -64    
-128   -576   
-48    32     
-48    176    
544    640    
-288   368    
16     272    
-128   -560   
-16    -272   
464    -32    
-176   112    
144    272    
224    -80    
96     384    
160    288    
-208   240    
336    -16    
-144   400    
80     48     
-64    -224   
80     -336   
176    -144   
-32    -32    
48     160    
256    32     
512    320    
-240   256    
16     -320   
176    64     
192    112    
96     48     
0      -528   
416    336    
-96    240    
224    -416   
336    464    
96     160    
272    112    
-64    448    
304    -1200  
-112   -224   
368    112    
-288   -256   
-80    -80    
144    32     
32     96     
-176   -176   
48     -3024  
160    400    
80     -560   
48     176    
208    -112   
32     0      
608    496    
-576   -1312  
512    -400   
368    768    
-192   -160   
240    -464   
176    -240   
-48    -128   
160    80     
16     -128   
176    -176   
-64    -240   
352    160    
32     160    
208    336    
-688   -240   
-96    -448   
-16    -384   
32     -400   
192    -256   
-160   -944   
144    -112   
0      176    
208    0      
-160   32     
336    160    
-96    -112   
48     112    
-176   -48    
-64    16     
80     272    
-32    192    
288    288    
-96    32     
64     -16    
32     80     
176    160    
-48    -48    
64     224    
-160   64     
64     80     
-48    -208   
128    192    
-48    -64    
-64    -128   
80     -128   
-32    -272   
-432   -160   
64     -256   
-64    32     
32     -64    
-160   192    
64     -544   
-400   -160   
272    -160   
16     160    
240    16     
-96    48     
32     -48    
32     -112   
-256   -48    
128    32     
-384   -96    
48     -64    
128    272    
-304   -16    
144    -48    
-224   -240   
224    352    
-48    -400   
-32    80     
-16    48     
48     48     
-80    -144   
176    -304   
-64    128    
64     -16    
-288   48     
-128   -256   
-224   -176   
144    -272   
48     -112   
64     -208   
-272   -304   
240    -1056  
224    144    
-112   -32    
32     -112   
-48    32     
48     -16    
-336   80     
16     64     
0      48     
-48    -128   
48     -48    
112    -48    
32     80     
48     0      
0      112    
112    -736   
-64    -352   
144    0      
144    16     
64     96     
-96    64     
-112   -32    
144    -112   
-48    64     
32     -128   
-48    64     
32     -48    
-96    48     
240    -208   
-128   -96    
256    -928   
144    -32    
48     -32    
144    80     
32     -128   
-64    -80    
128    -160   
-112   64     
-80    128    
144    160    
-176   96     
-16    -112   
128    48     
-1056  -208   
208    16     
-16    16     
-960   -32    
-32    -16    
-592   -192   
-112   -320   
112    -128   
0      80     
16     -64    
112    160    
96     32     
-96    64     
-176   -320   
-128   32     
144    -80    
16     144    
-32    -80    
-160   80     
64     96     
-160   48     
-144   112    
16     -16    
192    144    
-16    64     
0      -176   
-256   0      
0      48     
32     -80    
64     64     
0      -32    
-80    -96    
32     -160   
48     96     
128    128    
-272   64     
96     -48    
224    192    
-32    32     
-1328  -160   
16     -16    
-192   -144   
224    112    
-112   48     
176    16     
-336   -112   
-224   -160   
96     16     
-16    224    
0      -16    
-32    32     
-240   -48    
128    -128   
-80    -48    
-560   -48    
-352   -144   
208    -32    
80     288    
-96    -112   
-32    112    
-32    16     
-160   -112   
-32    -32    
256    80     
-160   -16    
32     -64    
288    192    
-240   -16    
-16    32     
-192   -16    
16     -96    
-512   -64    
224    224    
-288   48     
32     0      
16     112    
272    16     
-80    96     
128    64     
-16    -32    
16     48     
176    160    
-192   176    
-32    16     
-80    32     
192    96     
-576   -176   
0      48     
144    96     
-240   128    
64     48     
112    256    
-192   80     
-64    16     
112    64     
16     48     
-32    48     
160    -16    
480    320    
-704   -48    
112    32     
-16    -112   
128    240    
288    64     
-288   32     
112    32     
-48    16     
-16    -64    
0      -16    
16     32     
128    96     
-160   192    
-32    -128   
-80    -96    
-16    -16    
144    96     
-592   -96    
-64    -160   
96     336    
112    416    
-32    48     
16     32     
-16    208    
176    -64    
160    544    
-432   -336   
464    80     
-544   304    
80     -128   
160    80     
128    304    
-128   -112   
-48    64     
-320   -544   
464    144    
-224   96     
192    448    
0      -32    
-16    -128   
240    0      
-240   48     
288    80     
-112   64     
224    80     
-320   32     
256    112    
-336   -32    
-64    16     
32     96     
16     112    
-48    32     
-96    -272   
-32    -240   
224    96     
-160   448    
-32    -112   
80     -128   
-160   16     
256    80     
-320   240    
160    -16    
-160   288    
80     96     
-64    -160   
-32    96     
-144   -192   
80     -80    
-80    48     
32     -48    
96     48     
128    208    
-64    80     
-16    48     
96     96     
-80    -16    
-208   -240   
160    -432   
128    144    
64     96     
64     0      
64     112    
160    112    
32     160    
-48    48     
96     -240   
16     64     
-48    32     
-240   -368   
48     160    
-80    32     
96     112    
-64    64     
48     80     
-48    64     
208    224    
-96    272    
32     112    
-16    112    
144    0      
-112   112    
-96    0      
96     96     
-16    16     
224    80     
-256   224    
-32    -96    
-80    -80    
64     -64    
-176   -320   
96     64     
-176   32     
48     -128   
-112   48     
256    32     
-432   -544   
192    -192   
-32    160    
48     32     
240    240    
-256   -176   
-80    -464   
16     96     
128    176    
-288   -192   
208    208    
-192   400    
-48    -288   
48     0      
192    160    
32     112    
-288   368    
688    96     
-368   -64    
-32    -496   
464    272    
128    336    
0      48     
-48    -112   
272    464    
-208   240    
112    -208   
-160   32     
112    144    
-32    80     
16     -80    
336    272    
-304   80     
-64    -160   
144    240    
-144   96     
144    -144   
192    160    
-96    -448   
128    112    
-64    144    
288    432    
-48    -32    
48     -160   
-144   -80    
80     16     
-96    -208   
32     -288   
128    -16    
-112   64     
240    224    
-16    32     
-64    64     
64     -704   
32     80     
-304   176    
176    144    
-144   -32    
80     -288   
16     32     
128    16     
-48    96     
48     112    
-64    80     
-16    -112   
-96    32     
-32    -208   
16     80     
0      -672   
112    -256   
-48    -2096  
320    -432   
16     -352   
384    128    
-160   96     
16     -16    
336    0      
96     192    
48     64     
-176   -400   
528    -80    
-96    0      
384    48     
-256   -368   
288    -16    
-48    -928   
112    160    
-48    -1360  
64     -16    
16     0      
240    80     
64     112    
32     32     
48     128    
-16    -80    
176    112    
128    -400   
16     0      
64     -208   
96     160    
64     -288   
160    0      
80     -160   
160    96     
80     48     
112    96     
32     32     
-64    80     
80     176    
192    -32    
144    384    
80     -544   
-96    48     
176    -96    
96     64     
-96    -80    
208    256    
64     16     
-16    -80    
-32    176    
128    -32    
0      -80    
16     -16    
176    144    
48     0      
32     112    
48     -320   
0      -48    
160    -208   
144    112    
-32    64     
192    48     
-32    -16    
144    64     
288    352    
-400   -832   
320    -880   
-240   16     
400    -1312  
-448   -96    
288    -208   
-48    -16    
64     96     
112    112    
-48    0      
-144   -480   
240    -272   
176    128    
-80    -224   
32     96     
80     -144   
64     96     
80     -160   
-48    -432   
160    -96    
-16    -288   
80     -96    
80     -208   
112    -64    
-48    144    
64     -96    
-48    -256   
0      128    
-64    -224   
48     112    
-48    -64    
-80    -96    
-800   -96    
416    160    
-208   -112   
-96    -112   
272    -144   
48     -400   
64     48     
-16    -112   
16     16     
-80    -112   
224    48     
-64    -112   
-80    288    
208    -64    
16     -48    
96     -80    
48     -128   
80     -96    
32     -224   
32     -160   
-112   -688   
128    64     
-32    -224   
-48    64     
112    -80    
-32    32     
272    -112   
-32    -16    
80     320    
-144   160    
-240   80     
32     -96    
80     -112   
176    -128   
-96    -48    
224    -336   
-48    48     
-48    -800   
288    -112   
-112   -256   
224    112    
-80    48     
-16    48     
16     80     
160    32     
-176   -96    
144    -96    
-304   0      
192    144    
-16    112    
80     -80    
-48    0      
-48    -576   
160    16     
96     144    
240    192    
-128   160    
64     -160   
-128   -96    
192    -208   
112    160    
-112   -64    
-560   -304   
96     -176   
-224   64     
64     -256   
-128   16     
-112   -944   
0      -144   
240    -2320  
-160   144    
-192   -96    
-48    -224   
16     -32    
-16    -32    
-240   16     
16     -16    
-240   16     
-144   -480   
-192   -144   
96     -208   
-16    80     
-32    -192   
32     192    
176    -288   
-352   -208   
224    0      
-48    64     
128    80     
-288   48     
-176   112    
32     176    
-176   -128   
48     -48    
-112   -48    
-32    -160   
-16    -16    
64     -112   
-80    240    
0      -400   
-112   -32    
48     32     
96     -48    
-160   -32    
192    48     
-32    128    
-48    -16    
192    224    
-112   208    
-144   112    
-96    -128   
192    -48    
-432   -128   
176    -160   
-64    -480   
-736   -496   
-160   -208   
-928   -304   
48     160    
160    -320   
160    32     
160    304    
96     16     
160    -16    
-16    -16    
-144   -48    
-32    -16    
-144   128    
-48    272    
128    64     
-560   -320   
-160   208    
-32    -336   
-384   112    
-128   80     
-48    288    
-256   16     
80     -400   
-256   112    
-208   240    
-80    -320   
304    80     
-128   304    
-48    -80    
-16    -64    
-128   128    
-16    112    
64     336    
-240   336    
-272   208    
160    -64    
-2048  -32    
-64    112    
-16    -176   
-32    160    
336    -144   
-144   80     
0      64     
-128   -48    
-64    0      
-48    -16    
-224   64     
16     32     
-80    48     
-240   -16    
-80    48     
-592   -96    
304    112    
-192   160    
304    176    
-16    160    
96     160    
-80    -208   
192    -288   
64     0      
112    176    
48     32     
16     192    
-32    224    
-144   -80    
64     32     
-224   336    
224    208    
-544   -80    
144    48     
-96    -80    
64     96     
16     0      
-16    96     
-80    48     
-32    -32    
-96    -96    
112    32     
32     64     
0      -16    
-64    160    
-96    -32    
224    96     
-1440  -112   
208    -64    
64     624    
-16    240    
112    32     
-80    416    
-64    112    
-112   -64    
32     16     
-80    80     
224    64     
-224   240    
-32    -192   
-256   -96    
32     144    
-192   -48    
80     80     
128    64     
-112   80     
0      64     
192    128    
32     112    
-128   -80    
-144   -208   
240    192    
80     144    
-96    -160   
112    256    
-48    336    
-64    -128   
-112   80     
416    576    
-528   -880   
192    208    
-112   -560   
192    192    
-48    96     
96     -256   
160    432    
-240   -624   
48     576    
-208   -192   
-64    -576   
96     416    
-32    -16    
-96    112    
-176   -80    
0      272    
128    288    
-320   -48    
-144   -240   
96     160    
80     624    
144    448    
48     160    
48     64     
-112   48     
-128   -320   
-144   -208   
240    160    
-288   -96    
160    80     
-16    272    
464    320    
16     16     
32     64     
-64    80     
112    96     
-128   128    
-128   -48    
48     -128   
304    0      
0      288    
-80    -16    
-64    0      
320    112    
-80    80     
16     16     
-48    -32    
-80    32     
-16    -64    
-224   48     
560    480    
-64    -16    
224    -64    
64     288    
-112   -96    
-48    192    
160    -32    
-32    112    
240    -32    
-64    176    
336    112    
-416   80     
240    64     
-144   0      
112    112    
-16    96     
-16    176    
-48    48     
-96    64     
-96    -64    
-16    32     
-272   16     
272    64     
-256   160    
48     80     
-112   64     
256    96     
-144   208    
-128   128    
144    64     
-80    -144   
64     64     
-112   48     
96     32     
32     128    
-32    96     
32     -112   
-64    -16    
-128   -48    
-96    16     
48     128    
-16    48     
0      128    
80     80     
-96    48     
16     -128   
96     128    
-32    80     
64     96     
48     16     
64     16     
176    80     
128    -1360  
-48    32     
112    112    
160    112    
112    96     
-80    112    
64     -80    
64     -16    
-48    192    
208    0      
-128   32     
144    112    
0      -96    
-16    16     
64     -208   
-112   -464   
256    0      
-80    128    
176    64     
-192   -48    
192    48     
32     144    
144    96     
-16    32     
-64    -48    
192    0      
16     16     
256    352    
-400   -48    
16     96     
208    -112   
0      64     
64     272    
-96    208    
112    -128   
-80    80     
64     96     
0      -16    
192    -64    
-48    128    
-112   -48    
208    112    
-112   -48    
48     -16    
144    256    
112    -352   
-96    16     
384    -1120  
-192   16     
-16    208    
224    64     
-112   -48    
112    112    
16     -48    
-80    16     
48     -16    
128    64     
-16    -16    
0      -176   
128    16     
-16    -224   
96     112    
-32    -528   
48     64     
144    -1536  
128    144    
-16    -64    
48     96     
192    112    
-112   160    
16     80     
48     80     
-96    32     
176    80     
64     192    
16     -32    
0      112    
-32    448    
336    160    
-112   -880   
192    64     
0      0      
-176   80     
272    160    
16     176    
-208   0      
160    -192   
-128   -80    
160    64     
-80    112    
112    -320   
16     0      
64     -48    
176    160    
-112   -208   
96     160    
-192   -208   
208    -48    
64     128    
80     64     
32     64     
-32    -208   
32     112    
64     32     
128    128    
64     -208   
-16    96     
128    -336   
144    112    
-64    -32    
144    0      
-80    -16    
240    144    
-16    -256   
-48    64     
192    352    
-144   -64    
96     32     
288    304    
-176   256    
-336   -928   
-64    -224   
336    -112   
-144   -192   
336    48     
-224   160    
96     -64    
-64    432    
224    608    
96     -16    
0      -208   
128    16     
0      -992   
-160   -256   
224    -48    
16     112    
16     80     
-96    32     
352    256    
160    -48    
32     -160   
64     80     
-32    -80    
-176   -224   
-80    176    
208    -32    
0      -48    
-96    -48    
-320   -624   
-64    -512   
192    -96    
-80    -528   
96     -192   
-128   -320   
240    -32    
-144   -544   
256    -384   
-160   -224   
288    224    
-48    0      
64     -224   
-480   -64    
256    -64    
128    144    
80     112    
16     -32    
336    -1424  
192    -240   
32     -336   
176    144    
0      80     
80     96     
-224   -272   
16     -256   
-336   -16    
-272   -352   
-32    48     
-48    -192   
240    80     
-48    -96    
144    -128   
176    112    
-16    -96    
160    -1504  
96     144    
0      -112   
16     16     
80     -144   
80     48     
-96    0      
64     32     
-416   48     
160    176    
-32    112    
128    144    
-16    -48    
144    160    
-144   96     
32     -848   
128    240    
176    16     
-32    -16    
-112   48     
16     -96    
-48    -16    
-32    -416   
-112   256    
256    144    
-160   304    
-48    80     
-48    -224   
80     -64    
-112   32     
144    -304   
112    176    
-304   -144   
288    0      
32     576    
-16    32     
-112   -96    
-112   0      
-320   -32    
144    -128   
-224   96     
96     -80    
-336   -48    
176    -400   
-160   96     
80     -544   
64     112    
32     -2144  
64     16     
-336   -112   
496    112    
-544   160    
-16    320    
160    -224   
-192   -32    
-160   112    
0      32     
48     176    
64     48     
32     304    
-160   32     
-112   -352   
208    -752   
96     160    
-800   -352   
128    -176   
0      160    
0      -64    
16     128    
336    64     
-272   304    
128    -112   
160    208    
16     -208   
64     16     
96     112    
-48    -112   
48     -96    
0      112    
432    432    
-464   0      
0      -288   
-32    -608   
-112   80     
560    864    
-656   -256   
176    -928   
-288   -80    
-448   16     
-32    208    
-944   -288   
-64    208    
0      64     
-224   112    
16     0      
-592   144    
-176   48     
160    -32    
-64    208    
160    32     
-64    -112   
-368   48     
-208   48     
-176   96     
16     304    
-448   -272   
96     -96    
320    464    
-544   0      
112    144    
-464   112    
144    576    
-528   160    
-224   32     
192    416    
112    48     
0      -192   
-16    0      
-128   -192   
32     64     
16     -160   
-160   160    
-64    -64    
-624   -288   
256    -128   
-416   32     
0      160    
-288   48     
-48    -64    
-1840  0      
-32    144    
-144   -128   
-80    -272   
-64    32     
144    352    
-368   -96    
80     -128   
80     -80    
-128   80     
-48    -16    
-48    32     
128    128    
-144   48     
-528   -32    
-560   0      
160    176    
-64    -240   
96     -32    
112    -16    
0      80     
128    80     
-144   16     
-16    -176   
-96    -80    
176    128    
-176   64     
-96    16     
-112   -48    
16     96     
-16    -112   
64     -64    
0      144    
-240   -176   
224    -464   
-192   -128   
-16    -80    
-48    128    
-144   192    
-144   -16    
48     112    
64     192    
-400   -48    
-336   16     
448    80     
-352   32     
-144   -16    
-976   -224   
208    32     
0      -48    
-80    128    
192    272    
-112   64     
96     48     
64     224    
32     112    
-224   176    
128    160    
-208   144    
432    256    
-528   64     
96     208    
-576   -144   
208    160    
48     64     
-64    0      
80     112    
16     48     
32     112    
-48    160    
112    112    
48     64     
-128   128    
-192   -32    
-240   16     
-80    -96    
64     32     
-128   0      
32     16     
-112   64     
-192   -16    
-96    0      
16     -48    
80     192    
0      48     
-112   32     
128    48     
-48    48     
-176   -80    
176    224    
-400   -16    
160    160    
-288   -48    
-192   -48    
112    32     
-160   64     
160    48     
80     112    
80     112    
96     176    
-384   -112   
272    0      
-144   112    
0      128    
128    0      
-96    64     
304    64     
-240   -48    
32     64     
112    48     
16     112    
0      64     
160    144    
-160   112    
-64    0      
16     -32    
-64    80     
224    176    
-160   224    
160    144    
-288   -32    
96     0      
-80    80     
144    64     
-32    -64    
16     128    
112    0      
-48    96     
-16    -64    
32     -80    
-112   -160   
112    -16    
336    400    
-496   224    
0      144    
-112   64     
160    64     
-48    48     
32     80     
80     0      
-64    144    
144    128    
-176   128    
96     16     
64     144    
-16    96     
144    112    
-96    128    
-64    0      
96     176    
0      80     
80     272    
176    144    
-48    32     
64     80     
-64    80     
64     48     
-80    80     
64     240    
112    176    
-32    64     
-16    32     
-64    48     
0      48     
112    112    
-112   80     
80     32     
-64    48     
-64    160    
96     128    
192    48     
-240   112    
32     48     
-144   64     
144    192    
192    176    
-336   80     
176    272    
128    -128   
-128   -368   
96     176    
144    -2528  
-256   -112   
240    128    
-144   32     
-16    80     
0      32     
64     144    
144    128    
-48    96     
208    208    
0      32     
96     -16    
96     256    
96     -240   
64     -16    
16     -416   
144    128    
160    64     
-112   -48    
192    176    
144    512    
-208   336    
400    672    
-560   -336   
208    -240   
-176   -224   
-128   -80    
80     112    
0      -176   
-32    80     
176    -64    
-112   -80    
0      400    
-32    96     
-64    32     
16     32     
144    192    
-32    448    
-160   -272   
256    -80    
144    560    
-112   192    
-96    -144   
240    16     
48     240    
-48    -176   
96     48     
16     -1296  
96     384    
144    -384   
-64    336    
-48    -496   
208    96     
80     128    
16     32     
32     144    
144    80     
0      -64    
480    272    
-176   -416   
384    192    
96     480    
160    -304   
-64    144    
304    -592   
-16    144    
-128   -288   
48     -368   
208    192    
48     576    
-96    240    
-160   -416   
-80    -320   
368    176    
-240   512    
-64    -496   
336    272    
-80    288    
-192   -272   
-32    -1200  
144    16     
-80    -80    
112    432    
32     -16    
128    -96    
-160   -288   
64     -112   
336    288    
-256   -256   
320    16     
-352   -128   
336    112    
-112   -224   
80     48     
64     0      
96     160    
96     384    
80     496    
-112   -384   
-80    -224   
176    32     
-144   -304   
176    0      
48     -240   
96     320    
160    -32    
-224   -224   
336    -80    
-64    -16    
192    48     
208    544    
-64    288    
48     -384   
-48    -128   
240    0      
-112   96     
48     64     
0      -384   
128    -16    
128    -16    
272    80     
-304   272    
-48    -832   
160    -16    
48     -432   
16     -432   
-208   -32    
240    -384   
64     64     
-400   0      
64     16     
128    -16    
48     -480   
48     -144   
80     -32    
48     -80    
-96    -16    
128    -128   
112    96     
48     -288   
-32    480    
-144   176    
-48    -1440  
144    128    
320    784    
-448   -672   
160    -688   
64     144    
32     -96    
224    32     
192    192    
48     -784   
-64    -304   
288    352    
-144   -176   
176    -48    
-128   192    
400    112    
-128   -144   
-208   -400   
256    -160   
-1248  0      
96     -384   
80     32     
-96    -112   
80     -208   
160    -704   
96     400    
-80    -16    
-112   -160   
48     -176   
272    384    
-96    176    
16     272    
-288   -320   
304    96     
-352   16     
80     128    
-128   -160   
240    -144   
208    288    
-112   -288   
16     48     
0      -352   
96     144    
-80    -192   
-32    32     
80     64     
-80    304    
176    320    
-48    48     
-96    80     
-48    -272   
288    -80    
-32    -528   
96     -32    
0      -240   
48     160    
-32    -1248  
96     336    
192    16     
-32    -32    
64     -64    
64     48     
-64    0      
64     -176   
-192   -160   
16     -272   
-336   -96    
48     0      
288    192    
-224   -240   
144    96     
112    -976   
16     80     
128    -16    
272    288    
-160   240    
-80    -16    
0      48     
-192   48     
400    -80    
-352   48     
176    0      
0      96     
-304   0      
112    -128   
-64    112    
-144   -496   
368    192    
192    -176   
-304   80     
224    32     
-176   -160   
144    -48    
176    32     
192    48     
-32    64     
-176   32     
-64    -160   
0      16     
-96    -176   
144    192    
96     -176   
-112   0      
-336   0      
-64    -192   
-160   32     
368    128    
-272   -96    
-64    -160   
-32    -144   
-32    -288   
-240   64     
-96    -128   
-256   64     
48     -64    
-144   192    
16     -112   
-176   -64    
-160   32     
-96    -112   
0      96     
-32    128    
16     96     
64     64     
-112   96     
256    176    
-80    48     
-80    -16    
320    272    
-912   192    
-208   112    
-912   -272   
-640   -128   
32     16     
-688   32     
-160   96     
-528   -48    
-96    80     
352    32     
-208   48     
112    0      
80     32     
-448   -160   
144    80     
32     -160   
368    304    
-544   -144   
96     304    
-304   128    
-192   -16    
-240   -48    
-336   -32    
-96    32     
-736   16     
48     160    
192    80     
-272   -160   
224    -160   
96     128    
-128   0      
80     144    
-48    -16    
112    16     
-160   -64    
48     32     
64     80     
-240   80     
-112   80     
-240   0      
64     32     
-1040  80     
-160   -48    
-144   -80    
208    192    
-192   48     
208    208    
-192   48     
-48    96     
176    48     
-192   16     
176    16     
-128   48     
64     32     
-208   32     
-112   -32    
-800   -80    
-16    144    
192    0      
-176   224    
192    48     
-192   -16    
32     32     
-128   96     
144    176    
-256   176    
112    96     
-304   -336   
80     -112   
-224   -64    
-48    112    
-336   -16    
160    176    
-240   -32    
16     336    
-96    -64    
144    16     
0      -144   
112    128    
-48    96     
16     144    
-32    112    
-32    0      
0      176    
-160   -16    
64     -112   
128    -192   
32     96     
-1200  -80    
288    272    
-128   192    
-272   -288   
192    -720   
-16    -32    
-80    -144   
-48    -64    
16     112    
-176   -16    
176    224    
0      16     
48     192    
-208   -224   
-32    0      
-320   -80    
16     96     
96     -48    
-144   64     
80     96     
-256   -272   
320    128    
-48    352    
80     240    
-16    -32    
48     -176   
-144   -224   
208    224    
-320   176    
112    144    
-128   -176   
-224   -608   
160    304    
-208   -112   
64     112    
16     864    
-16    -48    
-192   -320   
112    432    
-400   -1040  
80     416    
-272   0      
80     176    
-96    80     
112    208    
-368   -576   
240    96     
64     528    
-176   -144   
208    -368   
64     512    
-16    240    
16     -48    
80     160    
-32    64     
-32    512    
-32    -112   
-48    16     
32     416    
-208   -224   
-48    304    
-144   -368   
0      -96    
32     272    
96     16     
-16    80     
64     -48    
80     128    
208    112    
-160   192    
96     192    
48     208    
64     224    
32     -240   
-144   48     
64     96     
48     -272   
224    -320   
-112   -96    
272    0      
-336   -112   
-48    -208   
128    448    
16     352    
-80    16     
-112   -112   
192    -32    
-16    96     
-160   48     
16     96     
-48    176    
432    416    
-288   272    
-144   -96    
112    16     
-352   0      
352    304    
128    464    
-96    144    
-352   -624   
64     -128   
0      624    
-112   -384   
96     224    
-16    320    
16     -224   
-272   80     
352    -64    
96     384    
48     -160   
-224   -256   
384    96     
-96    224    
-48    352    
-32    -16    
-144   112    
-128   -80    
-32    48     
80     -224   
-160   -48    
272    640    
-16    -80    
-160   -96    
48     384    
16     64     
-176   -192   
-32    80     
32     112    
-48    128    
64     32     
-16    112    
16     16     
16     96     
64     112    
-96    -832   
368    64     
-32    512    
-224   -272   
-256   -1248  
240    -96    
256    1008   
-336   -512   
400    176    
-144   624    
192    -432   
448    736    
-560   -768   
352    -240   
80     720    
-96    -656   
288    384    
-64    -384   
64     368    
-144   -96    
112    32     
-304   -48    
304    -320   
0      528    
48     80     
48     288    
-48    -128   
0      16     
32     -224   
16     -224   
112    -240   
-64    256    
528    240    
-16    48     
16     32     
32     112    
96     96     
48     128    
0      48     
32     96     
-160   -432   
64     320    
208    432    
-256   -16    
416    400    
-96    -176   
-256   -608   
96     -1552  
176    -32    
-16    -208   
320    256    
16     160    
0      -128   
-128   -336   
128    16     
-16    -240   
16     -80    
80     96     
-80    -96    
112    80     
48     -352   
64     -64    
64     -496   
128    80     
-80    -944   
112    112    
-32    -32    
112    80     
-48    -16    
144    -48    
-16    -48    
176    -32    
64     80     
-224   -224   
368    192    
-304   -160   
112    208    
-16    -256   
272    240    
-160   -192   
80     80     
-64    48     
144    144    
32     32     
208    128    
-192   112    
448    16     
-128   -16    
64     -32    
48     144    
48     0      
16     96     
64     256    
304    368    
-224   -432   
400    -288   
-272   -16    
208    32     
-128   -80    
176    48     
-16    112    
112    -384   
32     320    
32     32     
80     112    
-16    -128   
144    176    
-32    -160   
-32    16     
-48    -64    
208    176    
16     16     
0      112    
256    192    
-480   -96    
224    384    
112    -48    
-48    -16    
208    -272   
144    96     
128    -320   
112    -80    
-144   -160   
272    0      
-64    -32    
64     -336   
-16    -32    
-16    -800   
64     32     
-880   -144   
272    -96    
-32    -160   
400    -208   
-32    96     
112    368    
64     976    
464    944    
-144   416    
256    448    
-16    -16    
352    80     
96     224    
144    -48    
96     -352   
-192   -368   
256    -144   
-48    -144   
208    -144   
32     -64    
160    -272   
64     80     
208    -144   
0      368    
0      -144   
-112   -160   
112    -288   
-48    -144   
176    -64    
32     48     
-240   -16    
0      -80    
-64    -128   
-32    80     
208    48     
16     128    
-352   32     
192    -816   
-80    -64    
272    16     
-96    80     
16     64     
176    32     
-64    -48    
144    -160   
0      64     
112    -16    
48     32     
-16    64     
160    32     
48     -112   
-64    112    
272    -1104  
-64    32     
64     -832   
-48    32     
224    16     
16     48     
-112   -32    
128    -96    
-256   0      
256    48     
48     96     
16     -288   
304    256    
-416   -144   
128    0      
96     -208   
160    -16    
-80    -816   
-80    -64    
224    -80    
-96    80     
-64    -32    
96     16     
128    160    
-64    32     
-368   -80    
-16    -112   
-272   0      
64     80     
16     -128   
96     -112   
64     96     
-16    -336   
176    144    
-16    -48    
64     -48    
32     32     
64     -48    
-32    -64    
128    -16    
-32    144    
-80    -80    
16     32     
160    96     
-368   -16    
96     -288   
-80    160    
-48    -656   
16     32     
-208   -128   
256    -32    
-256   16     
160    32     
-208   -48    
64     -80    
-176   32     
288    304    
-224   96     
-96    -480   
192    -48    
16     -112   
224    320    
48     352    
-160   448    
-80    272    
-48    16     
-240   -64    
0      -80    
-16    128    
160    288    
-96    80     
-112   -272   
-144   -48    
48     16     
16     16     
0      -160   
-16    272    
32     -304   
-16    64     
-112   208    
-128   -320   
-16    -144   
0      128    
-32    -224   
304    560    
-176   64     
432    176    
-160   640    
288    -16    
-16    528    
208    -672   
208    -336   
-368   16     
-16    48     
-112   -48    
32     48     
16     176    
-1056  -32    
-48    -80    
-272   -224   
32     80     
80     16     
-64    272    
-64    48     
32     96     
-208   -320   
-80    96     
96     32     
-144   64     
48     64     
-224   -144   
-160   208    
48     192    
-48    16     
160    256    
-32    0      
-48    -176   
32     16     
-288   -288   
0      128    
-16    -304   
48     336    
192    96     
-32    -176   
32     -16    
-160   -48    
32     96     
496    368    
-448   464    
-48    208    
-240   224    
-576   80     
576    128    
-304   160    
32     80     
80     -48    
-64    256    
32     32     
-320   176    
160    -176   
-288   64     
112    208    
-224   64     
112    112    
-96    240    
160    128    
-1120  -128   
352    112    
-160   192    
48     -48    
32     -208   
-112   48     
-288   -352   
-48    -256   
-16    -48    
-16    -64    
-176   128    
192    240    
-16    -16    
-400   -16    
-176   -368   
0      -464   
-96    480    
-96    112    
320    272    
-160   192    
64     112    
-96    112    
384    -64    
0      128    
32     0      
48     -16    
16     48     
144    480    
-192   -128   
368    -48    
-416   32     
-16    -32    
-464   96     
-336   -288   
176    -336   
-320   32     
384    112    
-112   224    
64     80     
272    112    
-288   32     
16     288    
48     -448   
112    528    
-96    -160   
-240   928    
-32    -1104  
-720   -128   
-16    912    
-176   -624   
208    288    
-208   -272   
176    -32    
-64    112    
-304   -464   
592    64     
-160   400    
112    112    
-192   -48    
32     -208   
48     -64    
-32    480    
176    0      
-16    -112   
160    -240   
-128   112    
176    -128   
-64    -96    
96     48     
-16    -32    
192    208    
-272   -64    
0      16     
-144   -432   
80     176    
-96    128    
-16    -608   
96     -32    
0      384    
128    80     
32     112    
-128   96     
-144   -480   
-176   -96    
224    48     
-80    48     
-96    -16    
160    368    
0      0      
-128   -48    
0      -96    
-80    16     
176    -64    
-304   -400   
336    432    
48     96     
-112   80     
176    224    
64     112    
-64    112    
-144   -80    
64     48     
0      64     
-96    -224   
-48    -112   
32     -256   
-96    -80    
-32    32     
-32    -16    
16     64     
96     192    
96     176    
-128   -32    
144    96     
-96    -64    
-32    80     
64     80     
-80    64     
-64    0      
-48    128    
-32    -32    
-192   -112   
208    -16    
-16    128    
80     64     
-128   -48    
144    -32    
-160   80     
176    64     
-112   80     
96     32     
-176   64     
16     -224   
-224   -400   
224    128    
-112   320    
64     48     
112    -32    
32     128    
160    80     
-160   64     
48     48     
112    144    
-192   48     
144    64     
48     48     
-80    -80    
-16    96     
80     112    
48     80     
32     112    
48     112    
96     80     
-192   -16    
128    144    
240    160    
-16    240    
16     224    
160    320    
-32    96     
144    160    
-80    48     
-48    240    
160    192    
16     -368   
128    -48    
-112   -1712  
208    80     
144    80     
128    -64    
80     -80    
64     -64    
80     -48    
144    112    
-80    64     
-96    16     
-96    -288   
0      -112   
0      -208   
0      16     
96     112    
64     -928   
80     208    
272    368    
-112   48     
240    -16    
32     -16    
144    112    
128    160    
64     272    
-32    48     
160    320    
448    416    
-160   48     
32     -304   
80     16     
128    80     
-80    96     
240    -144   
-16    96     
48     160    
-16    -64    
48     -304   
400    160    
-208   -80    
-160   -800   
80     -192   
128    144    
-16    -16    
-64    0      
304    336    
-64    -32    
-32    -16    
64     -1136  
112    112    
144    0      
-96    -112   
144    0      
80     96     
-224   -112   
144    128    
-32    256    
160    64     
-64    128    
32     0      
80     16     
-160   -144   
160    64     
-80    -768   
32     32     
192    -752   
32     160    
80     144    
-192   96     
80     64     
176    64     
-16    128    
144    48     
0      64     
80     -80    
-32    16     
16     -144   
96     32     
128    -16    
160    176    
144    -176   
-224   256    
0      48     
64     80     
80     64     
0      48     
48     -112   
112    -272   
176    112    
32     -336   
-32    112    
64     -64    
64     96     
0      -256   
112    80     
0      -288   
-32    64     
32     -16    
192    304    
-224   176    
-16    -64    
112    96     
160    -48    
16     96     
48     -32    
-64    112    
96     64     
272    144    
-112   -288   
112    96     
112    -528   
-64    -192   
320    304    
-112   -1040  
80     0      
32     -192   
192    -624   
-32    96     
32     144    
16     48     
112    48     
48     -128   
80     80     
128    -16    
16     -16    
208    -16    
112    -448   
-240   -224   
112    -1472  
48     32     
-560   1056   
-64    -1232  
32     -256   
176    80     
-64    -304   
48     -2032  
64     -96    
48     128    
96     16     
0      112    
16     -144   
80     -208   
128    48     
32     -144   
32     -176   
96     640    
-112   304    
112    -848   
304    544    
64     -352   
-16    192    
80     -128   
160    -256   
0      -128   
144    -160   
-48    224    
160    -288   
-16    80     
176    -32    
-64    -560   
32     416    
128    -112   
-192   -224   
32     -112   
320    48     
-176   -128   
160    -32    
-96    -1104  
144    -304   
80     240    
-48    448    
48     -368   
-48    -16    
-144   -224   
16     -320   
-336   -80    
128    16     
-256   384    
304    480    
144    176    
16     96     
144    -16    
16     -1008  
48     -112   
16     0      
112    32     
16     0      
32     80     
-160   -288   
144    80     
-240   96     
160    32     
-240   16     
112    -32    
-48    32     
144    -16    
48     0      
-304   -640   
32     -176   
64     -656   
-128   192    
240    -96    
-16    -48    
16     16     
208    176    
-144   288    
128    -208   
112    -16    
-112   -336   
-544   -112   
32     -48    
-80    -64    
128    0      
128    80     
256    -288   
128    256    
-48    240    
496    272    
-336   16     
160    -48    
-48    -128   
112    0      
-560   -416   
32     -176   
352    304    
-352   160    
-144   64     
272    -144   
-112   592    
-48    -320   
-128   -160   
96     112    
-64    -208   
-160   0      
48     -16    
-80    -80    
-112   -144   
432    -192   
-304   288    
288    -112   
-176   -96    
96     96     
0      -192   
160    0      
-192   -128   
32     0      
112    384    
496    592    
-240   480    
-96    -336   
128    336    
48     -64    
0      64     
32     -304   
-48    -160   
-256   -128   
192    -304   
-16    -80    
-32    -176   
-720   -624   
-272   -64    
-240   368    
-272   -192   
-32    -112   
128    -144   
-96    -144   
336    464    
-224   528    
384    336    
-96    256    
-608   -112   
32     -48    
-272   192    
-16    16     
-496   -192   
-80    320    
64     176    
-128   128    
-240   -144   
-400   -320   
-144   -208   
-112   -32    
-112   16     
336    32     
-240   96     
-288   16     
16     128    
-384   -128   
-96    96     
144    128    
-80    96     
-16    128    
192    128    
-144   240    
-160   -32    
0      -144   
-352   -304   
304    -144   
144    192    
-48    176    
-176   -96    
16     16     
48     -160   
-224   -16    
176    224    
-352   192    
-80    0      
-176   -96    
-128   -208   
-208   -32    
272    64     
-240   -32    
64     160    
-1456  -112   
64     144    
128    -16    
-112   192    
-48    0      
-64    48     
80     16     
48     16     
-112   0      
96     -64    
-96    48     
80     80     
-80    -32    
-176   -16    
-80    0      
-1056  -80    
80     -64    
-208   64     
352    160    
-64    16     
-112   0      
-32    64     
-240   -80    
224    32     
-96    80     
-80    320    
144    -80    
-80    160    
80     -128   
-32    48     
-96    -16    
80     64     
-16    -48    
48     80     
16     48     
-16    0      
-96    32     
-32    64     
112    176    
-16    144    
-16    144    
-64    64     
-16    16     
-64    48     
0      -16    
-400   -112   
176    96     
-432   -80    
-32    64     
48     96     
32     32     
160    80     
-96    144    
16     96     
-176   80     
32     32     
0      16     
-48    64     
0      32     
-16    32     
-96    -80    
64     160    
-272   80     
-288   64     
64     32     
16     144    
-128   304    
0      208    
-304   48     
-64    -16    
16     -16    
96     48     
0      -32    
-64    16     
-192   64     
-144   -16    
48     64     
-304   -96    
16     -32    
-32    -112   
32     -96    
-64    64     
144    112    
-112   112    
-32    144    
192    80     
-160   -32    
-80    16     
-224   64     
-32    80     
-176   -80    
48     64     
48     96     
32     80     
64     80     
176    64     
-16    0      
112    160    
-112   64     
48     16     
-64    144    
48     32     
-48    0      
16     80     
16     64     
-80    128    
-96    112    
48     80     
-32    48     
-32    64     
128    48     
-256   -80    
128    64     
-192   -160   
-48    -96    
-48    48     
160    16     
-48    144    
16     0      
0      80     
-192   -176   
64     48     
160    224    
-384   -16    
288    176    
-128   288    
0      64     
0      48     
16     32     
-80    -192   
64     -144   
-16    32     
304    160    
-208   -160   
272    384    
-400   -48    
80     48     
32     256    
96     144    
-80    64     
64     64     
0      16     
80     64     
-32    0      
16     -16    
240    160    
-96    64     
112    48     
-128   16     
0      176    
96     64     
64     80     
240    80     
-112   0      
352    96     
-304   208    
112    128    
-240   -16    
208    -16    
160    128    
-128   -128   
-32    -80    
192    96     
-112   -320   
80     80     
144    256    
-192   176    
80     -208   
80     208    
256    80     
-32    368    
144    0      
-80    0      
192    176    
-32    32     
16     96     
-16    -48    
16     16     
224    -16    
-80    -320   
-80    -80    
-112   80     
-32    -48    
32     64     
128    128    
16     -32    
-16    80     
48     -32    
96     -80    
0      -272   
144    176    
-64    0      
112    32     
-112   -80    
-48    -352   
-112   -368   
-64    -544   
48     496    
-112   -96    
128    80     
-160   -240   
160    448    
16     160    
64     -80    
96     192    
0      48     
16     -32    
32     112    
96     112    
-16    -256   
144    176    
-176   -704   
512    288    
-480   -640   
176    32     
80     560    
80     144    
-240   -672   
320    272    
16     16     
-224   32     
144    0      
-16    -48    
16     80     
96     16     
48     80     
32     -96    
32     96     
64     -1392  
128    -16    
128    0      
-48    224    
-48    96     
-64    128    
48     80     
64     144    
-32    64     
16     144    
-64    0      
272    80     
-144   16     
80     -112   
192    192    
-16    -304   
240    -96    
80     -64    
208    176    
-64    80     
48     80     
-16    16     
64     192    
-16    96     
16     -48    
16     144    
-112   -48    
112    112    
-16    -208   
96     144    
64     -128   
0      48     
-16    -624   
48     80     
-48    -176   
-160   -16    
256    -80    
-160   -240   
176    96     
64     -192   
80     96     
64     -176   
16     128    
96     -144   
-208   -208   
64     -672   
64     80     
112    224    
112    96     
-16    64     
176    144    
-96    16     
112    -128   
224    320    
-192   288    
96     -144   
-16    -288   
144    160    
-32    -16    
176    304    
0      96     
-16    80     
48     -80    
288    192    
-464   -128   
320    -1680  
208    480    
-32    192    
112    -560   
-32    -240   
240    -896   
208    400    
96     544    
-176   -464   
-96    -256   
400    336    
-544   352    
160    -48    
-192   -704   
112    128    
-80    -160   
96     -16    
-384   336    
80     -400   
144    -16    
144    64     
-384   -1376  
224    -768   
272    528    
-256   -192   
160    48     
128    208    
-128   -272   
-80    -960   
32     -64    
80     176    
64     160    
-64    48     
160    96     
96     -80    
144    -448   
416    176    
-112   -192   
96     48     
-240   -992   
176    -80    
80     -80    
-272   -80    
48     -64    
48     -64    
32     96     
-128   -112   
-144   -128   
32     -304   
272    -128   
64     -160   
64     144    
96     -208   
112    -80    
240    -432   
-432   -144   
-16    -128   
80     64     
208    -80    
-32    -144   
160    80     
80     96     
-592   -160   
16     -64    
-304   0      
48     48     
-32    96     
80     -80    
-32    -176   
-32    -544   
176    -256   
112    -48    
176    -48    
-80    -80    
272    16     
128    80     
-256   -16    
48     -32    
16     -64    
128    0      
-96    -240   
-16    16     
112    -240   
0      -16    
-16    -256   
80     96     
64     -688   
16     192    
80     -80    
112    -128   
-48    224    
192    -80    
-112   -16    
48     32     
0      -208   
160    -208   
64     480    
-224   240    
64     -16    
0      -352   
240    48     
112    -656   
-176   16     
16     -16    
48     -48    
16     64     
160    112    
-240   -112   
-48    0      
-272   16     
-32    0      
0      96     
48     -32    
16     16     
112    -112   
64     128    
-32    -208   
144    304    
-96    96     
32     16     
-192   64     
400    -64    
-256   32     
-32    48     
64     48     
-64    -32    
16     96     
96     -80    
-128   256    
512    -144   
-320   64     
384    -32    
-160   16     
-16    -16    
192    144    
-288   64     
-32    -32    
-48    -80    
64     16     
48     32     
-96    -304   
-160   -112   
32     -336   
80     128    
-192   -144   
-96    80     
-480   -176   
-624   -16    
-192   -16    
-448   192    
16     32     
-64    64     
160    32     
112    64     
-112   32     
16     0      
-64    -80    
-224   32     
128    16     
-80    0      
160    160    
0      48     
-416   -80    
128    16     
-224   -32    
112    176    
-928   -208   
208    -208   
-224   16     
-128   176    
-16    -32    
80     48     
64     -16    
-32    64     
-16    -112   
144    64     
96     80     
-320   -32    
-176   -112   
-48    32     
-160   -112   
-192   -80    
-64    0      
-752   0      
80     112    
96     32     
32     48     
-288   -208   
176    240    
-160   -96    
96     -96    
-32    80     
96     80     
-224   -64    
272    -16    
-64    192    
-32    144    
-176   0      
-256   64     
336    16     
-192   -80    
128    144    
-304   -208   
16     48     
64     -32    
-128   176    
-32    96     
-144   0      
64     80     
-272   0      
240    -96    
-160   96     
240    32     
-368   16     
48     0      
-864   -256   
64     144    
16     32     
128    48     
32     64     
-96    -16    
-80    48     
-112   16     
-16    -16    
80     192    
-144   128    
-48    64     
-224   32     
-112   -32    
-448   -192   
208    80     
80     176    
64     16     
0      80     
-272   -128   
32     -96    
0      -128   
224    80     
-272   32     
160    64     
-144   -48    
0      272    
-224   288    
-272   112    
320    32     
16     -160   
0      -32    
-176   32     
-16    112    
-160   -96    
16     -64    
224    96     
-32    96     
-96    -64    
-64    -112   
96     80     
80     48     
-16    176    
16     176    
16     848    
48     336    
-288   160    
-176   0      
-96    0      
112    96     
16     432    
-32    480    
-128   208    
176    48     
-160   -128   
112    -80    
-128   -752   
96     -400   
-112   -64    
160    96     
-224   -48    
16     240    
-128   -32    
-144   -32    
96     0      
-112   32     
144    128    
48     288    
-80    16     
128    -80    
128    96     
-176   384    
-256   -704   
336    -544   
-176   240    
208    48     
-208   112    
192    144    
-128   -240   
32     352    
-16    -464   
176    128    
80     512    
-96    144    
80     -160   
128    112    
-48    256    
96     -48    
-192   -64    
320    208    
-400   -384   
16     -144   
128    272    
-176   -80    
64     112    
16     16     
16     144    
64     144    
336    224    
-368   304    
128    16     
-224   -48    
224    160    
288    432    
-128   672    
-144   -112   
-16    144    
64     80     
-128   32     
304    112    
-48    80     
144    64     
-192   0      
80     96     
-32    48     
0      80     
0      48     
80     96     
-32    16     
64     -48    
-224   -336   
16     -208   
320    -16    
-192   176    
80     128    
-32    -80    
32     48     
48     32     
-32    32     
240    352    
-32    336    
48     128    
-144   -80    
-48    448    
96     256    
-64    -32    
128    -32    
128    32     
-128   96     
112    48     
32     80     
0      -112   
176    128    
64     224    
80     32     
112    -16    
-16    -16    
-64    64     
80     -80    
-96    -352   
176    0      
0      144    
-160   80     
112    -672   
96     -640   
64     -304   
144    48     
128    176    
112    176    
48     80     
128    224    
-64    80     
-144   -352   
64     -48    
96     -80    
-96    -16    
48     16     
-64    80     
160    128    
64     80     
16     64     
112    -80    
-64    -400   
256    256    
-176   1024   
192    -384   
-64    144    
-48    576    
144    -336   
-16    -48    
32     192    
-16    -1008  
240    -768   
-48    336    
208    128    
-128   64     
176    304    
-272   80     
160    336    
-32    -96    
-48    48     
96     48     
-16    -288   
48     -16    
64     -336   
0      -32    
144    -448   
192    160    
-48    -400   
32     -208   
-16    -160   
208    272    
-96    16     
-96    -384   
160    -400   
-96    80     
304    160    
-64    144    
112    272    
16     80     
0      160    
-80    -304   
-128   176    
368    -1056  
-384   272    
272    -176   
0      64     
240    224    
-288   96     
32     0      
48     -48    
-144   -208   
640    16     
-352   144    
464    -160   
-96    96     
208    -320   
0      -16    
96     -912   
48     -80    
448    -848   
-336   -48    
432    -32    
-112   224    
224    80     
-144   64     
16     32     
128    64     
96     96     
-96    -368   
448    96     
-176   -336   
448    -64    
-432   16     
480    112    
-336   -912   
208    80     
-48    64     
112    128    
-160   -80    
112    32     
160    224    
80     -144   
-160   96     
496    -96    
-208   96     
176    -64    
-64    -112   
304    -144   
128    48     
80     -128   
-160   48     
16     16     
112    48     
144    48     
64     -464   
16     80     
160    -128   
-16    128    
64     -80    
64     -16    
-64    -176   
112    112    
-240   -128   
48     80     
-48    -224   
192    0      
-176   -64    
240    -1296  
-80    -832   
16     -160   
224    240    
160    0      
-16    -560   
176    32     
112    48     
32     -288   
16     112    
160    -32    
-16    -688   
48     32     
64     -176   
128    0      
176    96     
-80    -496   
-96    64     
112    32     
80     -16    
16     -320   
112    0      
64     -1792  
0      -80    
96     -112   
-64    208    
192    -112   
-64    64     
16     -176   
-128   112    
-160   -48    
96     -48    
-448   -32    
192    32     
144    16     
-96    -208   
64     -112   
112    -176   
0      -96    
112    -256   
-112   -368   
272    -224   
-160   64     
-16    -96    
112    176    
-112   48     
-32    80     
-656   16     
-96    48     
128    -32    
-240   128    
224    64     
-32    144    
304    0      
-112   -608   
176    64     
176    -112   
48     80     
0      64     
16     48     
48     -208   
208    -128   
-208   0      
-32    -96    
-128   -32    
-16    -32    
32     48     
-16    -208   
-208   -48    
128    -1152  
-48    144    
16     96     
-16    96     
-224   64     
336    -128   
-272   -80    
208    -80    
-192   -48    
32     -80    
64     -64    
64     -64    
112    -64    
16     -160   
128    112    
-112   -320   
48     96     
128    -1264  
-112   112    
128    -192   
192    -96    
-160   32     
336    -16    
-400   -64    
256    48     
-752   48     
48     -64    
-736   -48    
48     -240   
-64    128    
224    112    
-272   64     
128    -608   
176    224    
192    224    
-144   -48    
16     16     
208    -48    
176    -48    
64     -80    
-64    80     
64     -48    
-144   16     
272    -16    
-64    64     
288    -144   
-240   128    
32     -704   
-48    288    
16     -80    
-48    -384   
-176   -144   
48     -144   
-64    112    
32     288    
-256   0      
80     -32    
0      48     
96     -320   
-80    -16    
-32    -400   
64     -32    
128    -160   
-32    -32    
112    288    
-480   -592   
-16    -464   
-16    80     
-96    48     
-192   -112   
-16    -112   
96     16     
-256   -320   
80     -464   
192    -208   
-192   16     
-224   -160   
-32    -224   
-1216  -96    
-384   -128   
-192   -208   
80     448    
-16    336    
32     272    
-240   -144   
32     -112   
96     80     
-192   48     
-480   -240   
128    64     
-224   -80    
0      -144   
16     -240   
-16    160    
-128   640    
-256   -416   
16     48     
-304   224    
-80    160    
-224   -448   
192    128    
96     560    
80     256    
-336   -592   
208    352    
-256   -32    
-32    -64    
192    -16    
16     64     
336    144    
-160   -16    
-176   -288   
-128   256    
80     -80    
-208   -96    
48     160    
32     32     
-80    -64    
-160   -256   
48     352    
64     -176   
-320   -16    
176    0      
64     48     
-144   96     
16     16     
16     16     
-416   -48    
128    208    
-320   96     
208    16     
-480   -96    
64     -176   
16     384    
256    496    
16     96     
-336   -336   
48     -384   
-240   32     
-320   -336   
144    -432   
-352   480    
448    512    
128    592    
-80    368    
-96    32     
-1200  192    
240    576    
-160   -64    
96     -64    
-48    48     
16     -32    
16     -176   
-176   -496   
16     -112   
-32    144    
-48    -64    
80     96     
160    32     
-352   -16    
240    80     
-352   0      
96     64     
-80    48     
0      48     
-16    48     
-32    32     
0      48     
-96    0      
352    160    
-288   16     
128    -144   
-48    96     
0      528    
-192   -144   
16     -320   
-192   -80    
0      -16    
-592   -16    
32     736    
-112   592    
-80    176    
112    0      
-32    112    
144    224    
-240   -80    
0      -80    
32     48     
-32    240    
-32    128    
-144   -208   
-288   16     
32     -176   
16     -176   
-32    288    
-96    -624   
192    544    
-128   32     
48     80     
-16    320    
-192   -144   
-64    -64    
-112   -912   
0      -336   
96     1104   
-80    -336   
112    -48    
160    320    
-16    128    
-128   -128   
224    -16    
-32    48     
32     -448   
-160   416    
64     -256   
-192   0      
80     224    
-32    -128   
-16    96     
0      -80    
80     112    
-144   48     
144    160    
16     -16    
-304   -512   
176    -48    
80     -64    
64     -112   
-240   64     
144    144    
-96    192    
-208   32     
-80    -208   
112    96     
-160   -128   
48     16     
-16    -16    
112    192    
64     128    
-48    160    
112    96     
0      64     
-240   -272   
416    112    
-192   128    
16     -128   
-80    -96    
112    -160   
-16    32     
0      80     
144    160    
16     112    
16     336    
-32    -176   
256    -32    
-80    240    
80     176    
-176   160    
80     32     
-32    0      
16     64     
-144   32     
128    64     
32     768    
48     48     
32     16     
96     32     
-112   -16    
96     208    
112    240    
-48    -80    
64     16     
304    320    
0      128    
112    256    
112    -16    
112    112    
48     -32    
112    112    
-176   -32    
-80    -1344  
48     -64    
304    192    
-112   16     
32     112    
-80    112    
-16    48     
48     128    
128    144    
-80    16     
224    64     
-80    -48    
48     -304   
496    352    
288    32     
-192   -336   
144    16     
0      -96    
64     48     
-64    0      
16     48     
96     144    
48     80     
192    144    
-144   80     
0      32     
-240   64     
16     -224   
-96    144    
224    240    
0      -16    
48     224    
0      -208   
-32    80     
192    48     
48     64     
112    128    
-128   96     
32     32     
144    80     
-160   -384   
-16    16     
240    48     
80     96     
160    32     
-96    -304   
144    80     
-64    -1152  
96     0      
144    0      
-48    192    
192    48     
-160   32     
256    80     
-128   48     
176    80     
176    192    
-16    48     
160    80     
-320   -128   
176    -80    
64     176    
-144   -512   
112    128    
80     64     
80     -48    
-64    -48    
192    112    
0      -80    
-32    32     
160    -32    
288    304    
-272   48     
80     -208   
112    96     
16     0      
176    64     
64     -288   
-48    -96    
48     -720   
-48    -32    
288    -128   
176    224    
-160   -32    
64     48     
192    64     
32     112    
144    224    
256    -80    
-112   48     
320    48     
-144   -96    
-32    -128   
128    144    
-96    -752   
48     48     
80     80     
128    176    
-48    -32    
80     16     
16     -16    
64     176    
48     112    
176    64     
96     112    
160    224    
-64    80     
128    -112   
48     32     
32     64     
48     64     
-48    80     
32     144    
-32    64     
48     128    
64     80     
64     -96    
32     80     
96     -576   
96     96     
48     -224   
-48    112    
48     16     
112    144    
-64    -128   
80     112    
-112   -768   
160    208    
0      176    
192    256    
-112   32     
-16    -176   
96     -176   
-128   -80    
-16    -128   
192    -464   
48     80     
176    256    
80     128    
144    64     
0      16     
272    96     
-48    -816   
80     112    
32     -736   
32     -176   
208    144    
32     -144   
64     -96    
176    -1184  
208    608    
288    400    
-192   -64    
224    0      
-144   -144   
64     -336   
48     96     
-16    -48    
-112   -16    
48     -304   
160    -208   
-48    112    
368    448    
-304   272    
-64    -512   
160    -176   
-96    -2256  
192    -480   
176    208    
208    32     
-48    -224   
96     416    
32     -352   
-144   -160   
-64    176    
0      48     
-224   -48    
64     32     
128    0      
-160   -144   
64     -384   
112    -112   
32     -208   
176    -336   
-16    272    
192    64     
160    272    
-240   -368   
192    368    
-160   224    
208    224    
-224   48     
16     -336   
32     208    
-208   -416   
304    128    
-128   -224   
224    64     
-96    -720   
-224   -176   
288    -16    
256    304    
-176   -304   
-16    112    
-352   128    
240    -704   
-816   -560   
528    -304   
-768   112    
576    288    
128    336    
-112   -608   
480    -336   
-128   -240   
112    -208   
128    -208   
-16    336    
-16    -16    
144    304    
-384   -112   
160    -688   
-48    528    
144    592    
-672   -464   
224    -16    
-384   80     
16     -160   
-304   -288   
240    -48    
352    672    
-304   -800   
304    -256   
-16    528    
384    160    
-464   -464   
240    -304   
48     -32    
32     0      
0      80     
112    -224   
-1056  -176   
32     32     
224    96     
-160   -160   
48     64     
16     -512   
192    304    
-112   400    
160    32     
-224   -448   
160    -608   
-336   416    
-32    304    
-16    -384   
16     -336   
64     304    
112    -192   
-80    -368   
384    -160   
-144   256    
-320   -992   
336    -528   
-176   576    
256    64     
-128   -96    
32     224    
-160   -304   
48     96     
352    528    
-256   16     
-1040  -336   
112    -1440  
128    -352   
128    448    
416    688    
-160   -64    
160    32     
-208   64     
384    -48    
-256   -112   
144    -80    
16     112    
144    48     
-16    0      
64     -208   
-128   80     
288    32     
-288   -64    
-768   -48    
144    80     
96     -144   
-688   16     
-16    144    
-320   -128   
0      -16    
32     -192   
-96    -176   
272    96     
-416   128    
-288   -208   
208    144    
-640   -624   
272    112    
-384   32     
-48    80     
-16    -32    
-320   -192   
224    480    
-208   208    
80     0      
-256   80     
-32    0      
-320   -400   
-16    -144   
-384   -288   
16     16     
64     320    
240    480    
-304   0      
-112   448    
-48    80     
0      32     
16     48     
-32    0      
-16    16     
-160   256    
-176   224    
-496   128    
-80    224    
96     32     
224    416    
64     64     
16     144    
-112   -144   
-16    0      
80     160    
-144   64     
-96    64     
-64    -64    
-320   0      
-112   48     
-64    80     
-160   48     
-80    112    
-384   -128   
64     48     
-160   -160   
-32    32     
48     16     
-64    80     
176    -176   
160    -16    
-192   160    
112    0      
-176   16     
112    32     
-32    48     
-96    160    
-160   48     
-832   -48    
288    480    
-496   -48    
144    -16    
-112   80     
112    -128   
-32    96     
-64    -144   
-16    48     
-144   -32    
-112   0      
-16    -80    
-160   -16    
-224   -128   
96     224    
-544   0      
48     48     
64     32     
-48    64     
48     256    
-256   -16    
-304   -176   
432    -304   
-64    -208   
128    -96    
-64    -272   
48     64     
0      224    
-64    240    
16     -112   
-240   -208   
176    208    
48     176    
-272   16     
-176   -64    
-48    32     
0      112    
-112   -144   
64     32     
112    176    
96     112    
-48    80     
64     -16    
-144   -32    
160    224    
-224   -48    
32     0      
176    192    
-224   -48    
-64    240    
368    272    
-272   224    
-64    112    
-96    48     
128    32     
-144   16     
-64    192    
128    224    
-144   16     
-128   32     
0      0      
64     112    
-80    16     
48     80     
256    176    
-208   32     
-32    64     
-128   96     
80     16     
-64    -16    
48     96     
16     176    
-16    48     
-176   -48    
192    112    
-176   -16    
64     16     
32     32     
96     128    
0      48     
-128   -80    
80     0      
80     208    
-32    80     
0      48     
80     112    
-176   80     
80     320    
112    176    
-112   48     
128    32     
-16    64     
128    96     
-128   32     
-48    80     
48     64     
16     144    
160    272    
16     192    
-240   -48    
368    400    
-400   112    
240    0      
-336   48     
272    112    
-80    64     
16     32     
-80    -64    
48     32     
64     80     
32     96     
256    320    
-64    176    
-32    -16    
-112   -32    
32     32     
-128   -80    
96     16     
48     0      
-240   -192   
48     -208   
0      80     
112    112    
-80    96     
16     80     
288    144    
-272   112    
32     -32    
-48    16     
128    160    
-48    -32    
-16    -32    
48     -16    
64     64     
0      -1072  
-16    160    
128    304    
-16    224    
-16    352    
48     160    
-48    16     
-80    32     
144    -96    
320    192    
-160   80     
-80    -32    
-176   -16    
112    -80    
-416   -96    
-16    -624   
32     -208   
96     16     
-48    -80    
32     16     
96     32     
-48    80     
128    176    
32     112    
192    272    
-224   192    
224    368    
-112   272    
208    -272   
-80    -240   
112    -96    
80     16     
-48    224    
128    -16    
-64    -64    
-96    32     
64     208    
480    528    
-384   -384   
240    112    
-48    272    
144    464    
96     64     
-16    -80    
-32    -192   
-112   112    
96     -192   
16     -720   
0      128    
160    160    
96     48     
-48    48     
112    64     
-32    -528   
-96    -208   
400    256    
-128   -48    
0      -32    
-64    -272   
224    144    
-16    32     
0      224    
64     160    
224    432    
112    -16    
-192   16     
-272   -960   
256    -176   
16     416    
64     48     
64     0      
-16    96     
32     -160   
256    -144   
48     336    
80     -112   
16     -64    
0      -480   
32     48     
-176   -1152  
64     -32    
-64    192    
144    272    
80     224    
192    -80    
-176   -416   
320    400    
0      544    
64     -224   
-16    64     
208    192    
16     96     
16     -864   
128    144    
48     64     
0      -160   
-48    -400   
-112   -48    
128    0      
-16    -32    
160    128    
-128   -80    
272    160    
-112   -160   
240    48     
-528   -1472  
864    -304   
-128   640    
112    176    
32     -416   
32     224    
-128   -96    
-96    80     
48     -192   
528    544    
-512   -192   
-48    -512   
320    384    
-160   -320   
-48    272    
176    48     
-48    160    
-144   384    
176    336    
-240   -736   
-112   -432   
160    112    
-160   576    
160    -272   
-80    128    
96     416    
16     -336   
48     -720   
-112   -240   
16     352    
-80    -704   
272    288    
144    768    
-224   -416   
64     -128   
560    832    
-240   944    
96     -656   
-32    96     
528    64     
-688   -592   
304    -16    
-160   -624   
160    -64    
32     -672   
112    -16    
144    -144   
16     352    
80     -64    
128    176    
64     -480   
-96    64     
304    -816   
-272   192    
-288   -432   
-96    -192   
-400   272    
96     -48    
48     256    
16     -256   
-64    -320   
-16    -1776  
160    -128   
48     112    
-64    16     
112    -80    
80     96     
-336   -864   
224    96     
-48    368    
-96    -496   
32     192    
16     -64    
80     -352   
128    -144   
0      -384   
256    -496   
0      96     
-16    48     
-16    0      
32     -48    
-48    80     
32     144    
128    -80    
-256   -16    
240    -32    
-160   -192   
64     -240   
16     -64    
80     -48    
-80    -208   
240    48     
32     48     
96     -1856  
144    64     
-16    -64    
64     160    
96     -80    
32     -96    
368    272    
-304   272    
-496   -144   
32     -96    
-928   -16    
-64    48     
64     -16    
128    -96    
-112   -16    
80     -496   
192    64     
-96    0      
80     208    
32     48     
176    -32    
-160   16     
16     -112   
192    -16    
-48    -32    
32     48     
48     -176   
-32    -208   
32     -320   
16     0      
-16    -416   
112    48     
0      -384   
48     96     
-384   16     
544    112    
-336   -144   
320    -160   
-80    64     
128    -112   
-224   -80    
208    -112   
-336   0      
128    -128   
208    272    
64     -16    
80     160    
144    -2288  
208    -128   
-256   16     
-48    -48    
64     0      
96     64     
-128   -64    
144    0      
-96    80     
-96    0      
128    224    
48     -48    
-80    -48    
96     -112   
64     80     
96     -48    
-144   96     
-144   80     
96     160    
-384   -80    
16     -336   
-176   -32    
-48    -128   
-32    0      
-32    64     
-288   -48    
256    144    
64     256    
-32    -448   
128    48     
-112   16     
-32    -240   
0      -48    
128    80     
-32    0      
-32    -176   
128    80     
32     0      
-16    96     
-16    -128   
-480   -16    
-1328  -64    
48     208    
80     -32    
144    112    
64     160    
-48    80     
64     -48    
-416   80     
16     -16    
-128   -240   
64     -320   
400    -144   
-160   -256   
-896   -192   
48     -48    
-128   -240   
80     -288   
-176   -464   
-352   -256   
-512   -48    
-336   -96    
-272   16     
-416   0      
112    160    
-352   32     
-176   -192   
-96    112    
16     -32    
-112   -272   
-48    -48    
144    -32    
32     112    
-80    -80    
16     32     
-304   -336   
-32    -240   
144    0      
-208   64     
144    48     
-464   -144   
0      -16    
-640   32     
-80    48     
-144   16     
-144   -16    
32     -176   
48     112    
-80    -48    
160    176    
-32    32     
32     16     
-16    80     
112    144    
-144   96     
-64    32     
-48    16     
256    32     
-128   0      
-16    -176   
48     48     
-176   -112   
-48    64     
0      64     
32     192    
144    144    
-208   0      
48     64     
-80    48     
0      64     
-128   32     
80     32     
-176   -32    
80     64     
-448   -64    
-48    48     
192    16     
-128   64     
48     96     
-224   -128   
-32    -16    
-32    16     
-48    32     
-96    0      
176    80     
-16    48     
-160   -16    
-272   -144   
-16    64     
-496   -32    
-112   -368   
48     -144   
-144   -80    
384    -96    
-208   0      
240    -32    
192    288    
-32    32     
-16    80     
-96    -48    
-80    32     
48     32     
-144   48     
112    80     
-128   416    
256    192    
-320   -32    
-64    -656   
-112   -16    
336    112    
-208   -176   
96     -16    
-96    -192   
0      224    
-96    -16    
-192   -368   
224    432    
-80    48     
176    208    
-256   80     
192    464    
0      -144   
-112   288    
112    64     
-32    144    
0      128    
-16    80     
-288   -496   
128    64     
-16    144    
32     96     
-32    64     
-192   64     
32     64     
-224   -224   
96     256    
-160   112    
-128   -240   
-224   -1072  
128    -160   
304    1120   
-160   368    
0      -400   
144    -48    
-32    128    
-64    64     
96     96     
64     96     
0      400    
-112   128    
80     80     
16     32     
0      48     
32     80     
-16    32     
112    80     
-144   -256   
64     -96    
-48    176    
-16    16     
-208   -16    
80     48     
-208   16     
-112   -112   
176    -368   
-32    -144   
320    128    
-624   -624   
208    464    
192    864    
-192   592    
304    176    
16     448    
-176   112    
-176   -80    
112    -128   
-48    -64    
-176   -160   
112    -352   
112    -128   
-96    16     
48     96     
112    448    
-64    32     
80     -32    
-384   -144   
224    -192   
-208   112    
-48    192    
16     -288   
-128   -448   
80     -32    
-48    -48    
80     144    
-96    0      
-176   -64    
112    192    
-112   320    
-48    -112   
-32    -96    
-224   -96    
16     -224   
-144   -48    
304    -96    
144    336    
16     432    
128    208    
-240   32     
208    -2848  
-384   -432   
96     -336   
-96    96     
48     16     
48     304    
-128   -96    
304    -128   
-160   160    
-16    64     
-192   320    
-48    416    
80     -480   
32     96     
-32    -160   
96     48     
96     -464   
432    480    
-144   384    
208    208    
80     352    
-48    -320   
192    32     
144    144    
48     304    
-48    -160   
336    352    
-176   -432   
336    304    
-208   160    
352    -496   
-112   144    
-16    160    
176    144    
-48    -64    
112    64     
112    -32    
16     -256   
80     160    
-208   -16    
128    144    
112    96     
-128   -80    
256    96     
-80    48     
16     -320   
0      0      
-160   -1072  
176    -16    
-96    -112   
160    -128   
-160   -144   
176    -144   
-144   -448   
0      -128   
112    -80    
32     320    
176    416    
16     -192   
32     64     
-16    -224   
240    32     
-224   -960   
224    0      
-48    -352   
128    160    
192    384    
-80    160    
-64    -112   
32     -128   
32     176    
224    64     
-208   96     
160    -128   
48     64     
-16    -48    
160    0      
288    96     
-304   -64    
64     -1312  
-128   -288   
304    64     
-80    224    
16     32     
128    96     
-48    -80    
-16    -112   
64     224    
144    -64    
-16    48     
48     16     
-96    112    
48     -448   
80     64     
-16    176    
32     176    
-48    0      
192    48     
176    160    
-144   128    
0      144    
176    -16    
-80    128    
128    16     
-16    32     
-48    -80    
272    448    
-128   16     
128    160    
144    176    
32     -64    
-144   80     
192    32     
-144   -48    
96     32     
64     -16    
144    64     
32     64     
16     -192   
80     128    
64     -80    
-32    80     
112    32     
0      144    
-16    -16    
112    144    
-16    32     
48     240    
-64    32     
48     -624   
144    -1600  
-32    -160   
128    -1552  
-112   -160   
224    144    
-144   -80    
176    208    
-96    -96    
64     16     
256    -16    
-32    -2304  
-64    -48    
-16    -224   
48     80     
-32    96     
-16    -32    
-48    -416   
128    -1136  
64     96     
176    464    
32     80     
-96    -32    
144    -96    
0      112    
128    -112   
0      -80    
96     112    
-128   -16    
304    160    
-496   -32    
16     -384   
176    -16    
48     -96    
32     -48    
-32    -704   
192    -48    
16     -2304  
144    -32    
-32    -176   
-48    -16    
240    48     
-304   64     
112    -208   
16     -240   
-208   -112   
-32    -144   
-1008  -96    
96     32     
32     -128   
480    176    
-176   -224   
288    -272   
176    144    
144    -48    
-48    64     
32     -64    
112    16     
-64    -208   
304    48     
64     128    
-304   192    
-288   -192   
-176   -160   
192    -80    
80     96     
48     176    
96     80     
48     16     
112    -720   
-16    -64    
240    -224   
-80    112    
64     0      
32     16     
-64    -48    
304    -32    
80     176    
-128   -112   
160    192    
-624   144    
224    -128   
-368   32     
176    -64    
-112   -560   
192    32     
80     160    
160    -32    
-336   32     
416    -256   
-144   -112   
240    0      
48     0      
-144   -48    
-240   0      
96     -32    
176    -16    
48     -192   
16     -32    
64     -608   
128    176    
-112   -240   
208    -32    
-144   -48    
96     -96    
32     128    
-288   112    
-288   -80    
48     -32    
-96    -176   
96     32     
-48    -80    
64     -80    
64     64     
48     -16    
128    112    
-32    -784   
-48    -48    
128    96     
64     -80    
-272   48     
128    0      
-256   -144   
-16    -400   
-16    -32    
192    -16    
-96    -64    
192    -208   
32     0      
192    -480   
-80    240    
48     -144   
16     0      
32     16     
80     -16    
-208   -128   
96     -80    
288    624    
-224   240    
48     208    
0      16     
-672   -448   
128    -560   
-48    448    
-272   -448   
80     144    
-224   288    
-448   -528   
-96    -16    
16     48     
432    464    
-464   -592   
480    160    
-208   352    
176    80     
-400   -80    
128    64     
-576   -144   
-192   128    
-368   -192   
-752   48     
64     16     
-768   48     
16     0      
-1424  -144   
288    -224   
-208   512    
-48    -272   
400    -32    
-304   816    
160    -528   
0      256    
0      16     
208    -80    
-400   -448   
-32    -128   
0      -32    
-176   -16    
-96    16     
-96    32     
64     112    
-144   192    
-32    16     
240    80     
-32    96     
-272   -256   
80     128    
-48    -80    
64     272    
-160   0      
-80    -128   
-96    -16    
-16    -240   
-32    96     
0      96     
112    96     
-176   176    
-96    -32    
-112   624    
64     1040   
-112   320    
256    240    
-112   192    
64     192    
-48    -48    
-160   -48    
96     0      
-16    48     
144    144    
-208   -96    
192    176    
-720   -48    
112    80     
-608   0      
144    48     
-112   0      
288    96     
-256   176    
-192   -208   
-272   -592   
-96    -304   
-128   -80    
-320   -352   
-176   -80    
-256   -160   
48     -208   
-112   32     
512    400    
-1296  -720   
64     -704   
-336   -176   
-64    -224   
-112   -128   
80     -16    
-32    256    
-96    -16    
0      336    
-64    592    
-112   432    
-368   -336   
32     -288   
64     208    
-256   144    
-368   -112   
416    320    
-880   16     
-80    -576   
192    -48    
128    816    
160    1120   
-192   -528   
80     -112   
-48    160    
16     -48    
208    16     
192    176    
-240   96     
272    288    
176    400    
-80    784    
-400   -224   
-16    48     
48     96     
-240   -96    
432    -176   
-32    832    
16     -112   
-64    48     
224    -80    
-320   -640   
400    720    
-288   320    
80     -64    
-144   -80    
208    560    
-304   192    
-176   368    
272    272    
-352   -320   
-144   -288   
96     -32    
-32    -112   
-80    64     
-64    160    
-320   -16    
304    32     
-144   32     
480    304    
-224   -16    
0      176    
-160   0      
-48    80     
128    96     
0      224    
176    48     
32     0      
48     -16    
-144   -112   
112    48     
-112   -400   
-64    -272   
160    -48    
-64    176    
-352   -192   
192    16     
96     160    
96     96     
-128   48     
-48    -32    
64     -128   
32     -16    
96     64     
-32    48     
64     48     
128    160    
48     -32    
-32    -144   
-144   -96    
272    -144   
16     176    
-32    80     
0      128    
208    208    
-224   176    
80     48     
64     16     
16     -32    
192    96     
16     144    
-16    -96    
128    160    
-64    64     
-48    96     
-80    16     
80     0      
112    144    
64     80     
80     80     
0      240    
208    32     
-208   96     
160    112    
-80    16     
48     64     
-80    -176   
16     -48    
32     176    
112    16     
-16    -208   
-80    128    
240    128    
-192   -80    
32     -16    
32     32     
16     144    
-96    128    
96     64     
-32    48     
-32    96     
48     16     
96     128    
-80    48     
80     -16    
-96    32     
144    -128   
32     144    
-16    176    
-80    -16    
160    48     
0      80     
48     16     
-48    -48    
80     64     
288    256    
-224   240    
-48    160    
0      16     
176    64     
-128   80     
64     -288   
0      112    
16     32     
0      64     
-80    -80    
96     32     
96     64     
-16    144    
0      64     
256    224    
-192   208    
32     160    
80     16     
0      -80    
80     176    
16     -144   
112    112    
-176   112    
240    432    
-16    64     
48     64     
144    32     
112    32     
-128   -224   
128    64     
160    -80    
-112   64     
-128   -32    
48     -16    
224    64     
-176   -64    
112    64     
64     -480   
48     0      
64     128    
256    144    
-176   -64    
160    64     
112    128    
0      160    
-16    96     
96     128    
16     48     
128    -96    
48     80     
144    -160   
-304   -144   
432    -112   
-80    96     
304    352    
-16    96     
80     -64    
160    64     
112    128    
112    160    
0      32     
48     96     
16     80     
240    -16    
-176   96     
176    -64    
-128   144    
64     -224   
-160   -80    
240    -480   
32     128    
80     16     
256    224    
-288   224    
128    -96    
-144   64     
112    -80    
-80    32     
48     -128   
48     96     
240    -320   
-144   64     
192    -112   
-80    640    
208    432    
-32    64     
80     -112   
-16    128    
224    192    
-96    192    
112    0      
-128   176    
96     0      
128    -128   
128    144    
16     -240   
0      32     
64     -304   
80     16     
64     -80    
-16    208    
192    -160   
-16    -128   
144    160    
160    80     
-16    48     
144    -48    
128    144    
-272   -368   
176    208    
-48    -352   
16     80     
128    -192   
-320   32     
304    -704   
-144   -128   
32     -352   
16     0      
288    80     
176    -368   
64     -432   
64     0      
48     -1024  
80     -192   
32     16     
208    -16    
-16    112    
128    32     
208    208    
-192   -416   
160    -1312  
-160   -32    
128    -240   
0      80     
-560   16     
128    -80    
-96    -176   
176    -352   
-32    -112   
48     -48    
-96    -176   
320    336    
-128   192    
-16    192    
128    -80    
128    -128   
-32    -176   
-64    -112   
128    128    
-832   -96    
80     -672   
-32    -144   
256    -352   
-96    -16    
144    -624   
32     64     
192    -3280  
-144   -48    
48     -368   
-144   128    
192    -272   
-48    -112   
112    32     
-16    -96    
-64    -32    
96     48     
-816   16     
64     128    
48     320    
0      -352   
112    -256   
64     -272   
208    -112   
-48    -208   
144    288    
112    -16    
-32    144    
48     0      
112    -32    
80     48     
16     -80    
-384   -32    
0      -224   
64     64     
32     -192   
48     16     
48     -128   
-80    64     
144    -2048  
-32    176    
0      -112   
-80    256    
144    -112   
-176   112    
0      -96    
-32    -160   
-336   -64    
16     -128   
-416   112    
96     -48    
-32    -16    
32     -288   
-160   16     
-128   -1472  
112    -208   
16     0      
160    -128   
-176   80     
16     -64    
-288   -128   
32     -48    
-208   32     
160    176    
-448   112    
208    144    
-32    -96    
128    -208   
-48    48     
160    -256   
128    48     
-16    -80    
128    48     
-416   -464   
176    -112   
-336   128    
80     -224   
-480   -80    
80     0      
-320   -64    
112    -80    
-112   -32    
128    96     
-16    -32    
128    16     
80     32     
-256   -16    
128    -48    
-416   64     
176    0      
-304   -32    
208    -416   
-80    -96    
160    -368   
-304   -208   
240    64     
-272   80     
240    176    
-16    48     
0      -576   
-144   48     
-240   -448   
688    688    
-80    1072   
-80    -592   
128    -560   
192    320    
-160   -16    
96     -16    
-48    224    
-112   -160   
384    432    
-208   -320   
32     -160   
-1632  32     
432    -16    
-48    -32    
-752   -288   
112    496    
32     240    
-32    -144   
176    64     
0      -16    
208    448    
-64    272    
-640   -192   
-128   -96    
-128   -368   
96     64     
144    0      
-304   16     
-32    16     
-16    -32    
96     -144   
-240   208    
144    176    
96     64     
336    432    
-112   304    
-48    48     
-512   -256   
320    256    
-560   -112   
112    112    
-304   192    
224    80     
-128   -16    
32     96     
-160   128    
80     64     
-432   -48    
320    -112   
-496   -128   
640    160    
-144   208    
-112   -128   
32     80     
528    368    
-608   272    
128    -64    
-416   128    
160    48     
-464   0      
336    80     
-80    144    
-32    48     
-304   -16    
64     0      
-544   -48    
176    112    
-16    128    
48     192    
80     16     
-112   160    
-304   16     
64     48     
-32    48     
160    48     
-304   128    
48     -96    
-144   -48    
-112   -96    
-80    -128   
32     0      
16     144    
80     -64    
-32    112    
-32    -208   
-32    192    
64     32     
-80    112    
80     128    
-128   -192   
64     0      
-112   32     
-16    16     
32     80     
0      144    
16     64     
-32    32     
-544   -80    
-64    80     
64     64     
-128   16     
32     96     
-16    48     
0      80     
-176   -32    
80     64     
-144   80     
-48    32     
48     64     
112    160    
-336   -96    
128    144    
-976   -16    
160    80     
-80    48     
16     112    
-96    240    
-192   16     
112    -16    
-128   80     
208    64     
-176   32     
80     64     
-16    -32    
240    368    
-464   64     
-16    16     
-176   -48    
144    96     
-112   64     
96     96     
-128   64     
64     64     
-48    -64    
256    -32    
-80    112    
96     -16    
-240   16     
336    96     
-320   192    
208    64     
-160   64     
-32    -96    
80     0      
-64    32     
160    48     
-32    144    
48     64     
-48    144    
192    144    
-128   16     
-96    112    
176    96     
-96    112    
96     144    
-240   -80    
96     96     
96     80     
-96    -48    
-48    64     
-16    112    
48     96     
-16    32     
-112   48     
64     16     
0      48     
-48    32     
48     80     
-224   48     
96     80     
-48    -16    
96     112    
112    176    
-32    112    
-64    112    
112    192    
32     16     
-48    -16    
64     80     
-32    -16    
176    96     
-32    64     
80     80     
-208   -16    
208    256    
-96    112    
192    240    
-208   -16    
288    48     
-176   96     
-80    32     
32     64     
48     0      
160    48     
-64    176    
96     96     
-160   16     
0      144    
240    176    
-176   64     
64     32     
-48    64     
80     64     
0      96     
-112   96     
48     16     
-80    64     
192    80     
-192   96     
-16    16     
-160   0      
48     80     
-48    96     
-48    16     
-128   -112   
112    16     
32     64     
0      -16    
112    128    
-112   48     
16     48     
144    80     
32     160    
0      -48    
64     160    
-80    80     
-32    80     
-48    128    
640    688    
-368   912    
-160   208    
-32    544    
176    448    
-320   -400   
80     -240   
96     -192   
96     176    
160    240    
-160   336    
32     48     
-128   80     
112    48     
48     64     
32     64     
-96    -96    
-192   -32    
112    -1040  
-80    16     
496    528    
-432   288    
-16    128    
-64    -64    
96     0      
192    -16    
-96    64     
352    112    
-160   32     
64     64     
-256   -192   
320    -272   
128    -64    
0      -304   
-48    32     
128    80     
-352   96     
256    288    
96     480    
-96    384    
-48    -240   
-80    -128   
0      -16    
-80    128    
64     208    
176    208    
192    368    
-144   -80    
208    -224   
48     288    
32     240    
80     160    
112    224    
0      -96    
-48    272    
-32    48     
160    -256   
48     112    
-80    48     
160    144    
64     80     
-16    -192   
64     64     
48     -192   
160    160    
-208   -480   
208    544    
48     -448   
-336   -816   
352    -432   
-64    832    
112    352    
-80    -144   
112    -112   
64     -160   
-160   112    
144    -240   
-16    -16    
112    -176   
32     336    
64     -64    
64     -176   
80     -544   
0      64     
-16    32     
112    112    
0      64     
48     -128   
-32    -32    
96     448    
0      240    
48     0      
-32    112    
112    -320   
112    144    
16     -400   
48     64     
64     -144   
-64    48     
96     112    
64     64     
0      16     
32     64     
96     96     
48     -208   
-176   -64    
224    -336   
-160   -176   
-48    -832   
-80    -48    
112    -144   
48     96     
16     -16    
96     48     
0      128    
0      48     
48     -64    
-48    48     
192    192    
-48    -128   
-16    -16    
32     -160   
48     80     
16     -48    
64     176    
-112   -144   
64     128    
32     -128   
-64    -48    
-208   -336   
128    -1024  
128    32     
-528   176    
96     -400   
192    -32    
272    -1248  
-80    80     
-96    -128   
-176   -560   
-304   -688   
80     -544   
-416   -576   
160    -576   
-16    -32    
176    224    
0      -336   
32     -32    
-160   -64    
48     -320   
16     -192   
-320   -1376  
224    144    
80     96     
-80    -144   
80     32     
192    -240   
-256   -1040  
640    304    
-176   560    
256    -480   
96     -160   
96     144    
-176   -16    
304    16     
-128   -288   
80     48     
-112   112    
32     -16    
-32    -832   
-16    -1840  
304    464    
32     -384   
-80    -176   
64     -64    
-16    -32    
32     144    
208    160    
-208   -32    
48     -64    
-448   64     
272    240    
96     -32    
0      -48    
208    240    
32     -640   
32     128    
48     32     
192    80     
-48    -64    
208    288    
-192   -32    
128    -176   
-48    0      
304    304    
-880   80     
16     -176   
48     -160   
176    -256   
64     464    
0      160    
-208   128    
320    -2192  
0      128    
224    64     
-304   32     
144    128    
32     192    
-192   16     
144    -432   
-688   -16    
240    48     
-1440  -80    
32     -64    
144    32     
160    -80    
-96    64     
96     -1488  
-16    64     
64     -96    
496    160    
48     160    
16     -16    
-112   0      
96     -192   
-160   80     
-192   -256   
432    -256   
-480   128    
560    -224   
-336   -176   
352    272    
-80    -192   
192    192    
0      80     
-48    -16    
-176   -64    
240    176    
-416   -32    
224    64     
-80    -64    
336    96     
-640   16     
64     -64    
-112   -16    
0      -48    
48     -16    
0      -208   
32     16     
32     -160   
32     -64    
-192   48     
128    80     
-16    128    
-48    32     
112    0      
-96    32     
-256   -48    
96     32     
-80    16     
-16    -64    
128    96     
80     -112   
-112   80     
48     96     
16     80     
112    64     
-48    -48    
0      -32    
176    -160   
-128   -80    
208    -48    
64     16     
144    16     
-96    80     
-368   -224   
-48    64     
352    -192   
-1920  -160   
336    112    
-1040  32     
112    32     
256    -32    
-16    0      
128    0      
-160   -96    
128    -32    
0      176    
-400   -64    
192    32     
-352   -256   
144    64     
-240   -208   
-32    96     
96     176    
32     64     
-160   64     
-912   0      
-144   16     
496    240    
-32    144    
-48    -48    
64     64     
-96    112    
-192   160    
128    -32    
-176   80     
-16    16     
-48    -96    
0      32     
-304   48     
112    80     
-32    -48    
176    160    
-144   176    
16     64     
-544   -80    
-80    -16    
-48    -128   
192    160    
-176   -112   
0      144    
80     0      
-192   -64    
32     48     
-96    48     
-80    48     
48     16     
-32    -208   
-192   -48    
-160   -32    
0      -64    
64     80     
-48    -32    
16     192    
-80    -96    
-64    0      
32     0      
-64    96     
176    96     
48     160    
-80    80     
-80    -112   
-96    -32    
-80    -96    
-160   16     
-128   -112   
-16    80     
96     0      
-96    112    
128    16     
-80    32     
16     32     
-16    64     
-64    272    
32     96     
-48    48     
16     48     
-160   144    
-48    64     
176    32     
-352   32     
144    112    
-864   -256   
144    -64    
176    -48    
-176   -48    
272    192    
-208   80     
-48    -80    
48     -224   
-128   -400   
48     -384   
-160   32     
144    -80    
-80    -160   
-128   64     
-192   32     
-1008  0      
-224   -368   
16     -48    
-80    96     
80     -48    
0      0      
-48    -96    
80     -80    
-96    80     
96     144    
0      96     
-352   16     
32     464    
-32    160    
48     208    
-64    112    
-96    48     
48     64     
-16    112    
96     304    
192    192    
16     512    
320    176    
-160   -256   
64     -96    
-16    -272   
-288   -384   
288    32     
-352   128    
416    272    
-272   -48    
128    -48    
-64    96     
48     144    
-16    80     
-80    64     
48     112    
-16    464    
-16    32     
-192   -48    
-96    -144   
-48    -32    
0      224    
-32    -32    
256    112    
-176   192    
0      144    
224    112    
-192   288    
32     128    
0      -256   
32     64     
-96    176    
176    -16    
-192   -160   
80     192    
80     192    
128    416    
-48    96     
-80    -512   
-16    240    
320    -96    
48     288    
-80    0      
160    -336   
96     96     
256    624    
-80    192    
-208   -464   
288    -352   
-64    288    
96     352    
320    272    
-176   320    
96     -176   
80     96     
192    128    
-16    -16    
-112   -32    
240    80     
-64    96     
16     64     
128    48     
-32    64     
-96    0      
-48    -80    
80     -32    
-64    496    
48     96     
240    480    
-96    480    
16     -432   
-272   -208   
112    -48    
-16    208    
96     -16    
96     192    
64     336    
-32    -64    
0      144    
80     160    
-32    -16    
144    80     
-32    -16    
32     96     
32     -16    
48     -64    
32     -48    
96     208    
16     160    
-64    -144   
128    112    
-32    16     
112    192    
-64    -64    
112    144    
48     48     
208    -176   
-208   64     
160    -128   
32     96     
32     80     
96     64     
64     80     
48     64     
32     80     
-80    -416   
-48    96     
-32    -272   
224    -832   
224    400    
32     256    
16     -128   
112    208    
80     -736   
-128   -128   
208    112    
48     208    
96     144    
-64    -32    
80     32     
224    992    
-128   -352   
-176   -368   
448    368    
-272   208    
160    -352   
-176   -320   
32     272    
320    -304   
-96    -32    
48     304    
80     -112   
-48    368    
96     672    
-112   16     
240    688    
-144   224    
64     -304   
-224   -32    
128    576    
-64    160    
-32    -224   
64     224    
0      -224   
64     96     
48     -80    
0      16     
128    240    
16     224    
-128   -800   
192    -80    
-224   288    
304    512    
-144   256    
96     96     
48     -64    
400    16     
-176   176    
-48    -448   
288    128    
-48    -288   
160    96     
0      -256   
-48    288    
48     96     
-32    -16    
160    -144   
416    512    
-352   320    
-48    64     
-64    -32    
16     -128   
48     0      
48     -128   
112    64     
48     -576   
0      272    
96     -1072  
-272   -16    
144    32     
-112   192    
-112   0      
48     64     
96     80     
-80    -224   
64     -32    
96     -640   
128    208    
-224   -304   
384    -80    
-336   -160   
400    16     
-192   16     
160    112    
48     32     
-16    144    
128    -80    
-192   176    
48     -304   
416    -480   
-48    304    
320    -16    
-256   272    
320    64     
-64    -80    
144    -400   
-48    64     
32     -400   
32     32     
32     0      
80     160    
-64    304    
-96    144    
128    160    
16     -48    
112    144    
-272   -48    
176    -64    
-16    -336   
-32    64     
80     -16    
48     64     
304    -96    
32     -1152  
256    112    
112    256    
-112   240    
-304   -16    
0      -176   
128    -16    
-272   -1248  
32     -256   
-112   64     
48     -176   
-48    -368   
0      -192   
176    208    
-112   112    
176    -16    
-48    160    
-208   -128   
160    -32    
-480   -176   
112    -144   
-128   -48    
80     -304   
-16    -224   
-80    -272   
368    -96    
-16    128    
0      -240   
-48    -560   
64     -32    
96     -32    
48     144    
-32    48     
64     -208   
-368   32     
0      -240   
-48    -128   
32     32     
160    32     
-48    -736   
96     144    
80     -2016  
-176   -224   
144    -128   
16     32     
176    0      
-32    112    
64     -48    
-80    -128   
-144   -16    
96     -48    
-880   80     
192    -16    
-128   -160   
-64    -336   
176    -64    
48     -352   
-32    32     
16     32     
16     32     
48     -64    
112    80     
-176   -32    
64     -32    
-48    32     
128    144    
-928   -128   
-16    48     
96     -48    
-32    -64    
128    48     
-112   -16    
112    160    
80     -1296  
-176   -496   
208    -176   
80     48     
-112   16     
-48    32     
304    160    
-160   176    
-144   96     
-48    -112   
-448   -128   
0      -48    
112    -96    
0      -224   
96     0      
16     -1312  
-80    128    
160    64     
-128   -16    
0      0      
160    0      
-144   -32    
0      -112   
16     -32    
16     -16    
-48    96     
48     -128   
-1408  0      
-16    -400   
48     112    
112    -320   
64     144    
-32    96     
48     -240   
-32    0      
48     -16    
-256   32     
80     80     
-64    -48    
64     -80    
-448   -80    
-16    -144   
-48    32     
224    -304   
256    96     
-64    -48    
112    -80    
-192   -128   
240    -80    
-272   16     
144    32     
-288   224    
32     32     
0      208    
144    -112   
-848   -96    
160    -32    
-16    320    
0      128    
-96    0      
224    -240   
80     32     
-160   464    
240    176    
-160   -48    
128    -144   
-112   48     
-64    -32    
32     144    
-160   -336   
128    144    
-128   192    
0      -416   
-144   480    
144    -96    
-1312  -528   
-288   -224   
-32    432    
96     336    
-128   80     
-688   208    
-96    448    
16     -224   
-32    -32    
80     112    
-32    0      
-848   -304   
384    192    
-320   -160   
-16    128    
240    272    
32     448    
-48    16     
0      -112   
-128   16     
-352   -208   
160    112    
-736   224    
208    256    
-384   -96    
208    112    
-48    0      
208    -48    
0      -80    
144    16     
112    32     
48     256    
-128   -176   
-144   160    
-432   -576   
160    -192   
64     832    
-112   368    
-208   -112   
-288   -224   
32     -64    
-16    288    
96     496    
-144   -384   
-32    -80    
-48    144    
-240   144    
0      -1216  
48     -48    
-128   432    
-48    64     
-32    -160   
-304   -240   
208    -112   
-944   -192   
288    448    
80     336    
-224   -80    
-32    0      
-192   368    
-128   -48    
-288   -96    
64     -208   
-16    608    
0      -144   
-704   -80    
48     -160   
-352   -128   
-160   832    
16     -688   
-128   -80    
112    0      
128    -528   
-64    704    
-304   -256   
176    96     
128    784    
-400   -144   
-80    -192   
-176   288    
-144   32     
-96    -64    
-144   96     
-16    -16    
-80    32     
-32    80     
-112   -48    
80     16     
-16    112    
48     48     
-32    -48    
96     -128   
160    288    
-96    16     
-16    272    
64     16     
-240   96     
160    112    
-32    64     
-352   80     
0      -272   
-480   240    
-96    144    
-144   -32    
-160   -688   
-16    400    
272    352    
96     -224   
-176   448    
0      -384   
32     304    
272    -144   
-384   -416   
240    336    
-176   576    
208    -48    
80     560    
-128   -192   
-48    -112   
48     -192   
16     -288   
-16    144    
128    128    
0      80     
-144   32     
-80    -16    
-64    80     
-208   -112   
64     128    
-16    -16    
192    352    
-64    368    
-176   352    
0      32     
96     432    
-16    -400   
-64    208    
48     176    
-96    -32    
32     -144   
-112   -320   
48     256    
80     192    
0      -128   
128    96     
-16    32     
-176   -336   
32     224    
176    288    
16     272    
192    336    
32     224    
0      -48    
-144   -288   
-32    -112   
48     -16    
96     112    
-80    0      
80     112    
64     96     
-160   -32    
48     16     
320    304    
-128   160    
352    336    
-432   368    
16     80     
-176   -48    
96     32     
128    160    
-128   -48    
144    128    
-160   -96    
128    80     
-80    112    
-64    64     
16     16     
112    96     
160    160    
-160   112    
16     96     
-32    48     
208    160    
-128   96     
16     192    
-352   16     
320    -64    
-224   -48    
64     -16    
0      96     
96     80     
-80    -64    
240    -368   
-80    176    
224    160    
-304   64     
160    240    
-48    160    
16     32     
112    32     
0      -80    
0      112    
64     112    
-160   272    
80     0      
-160   -48    
64     -32    
-48    48     
-144   48     
144    192    
-32    16     
-32    112    
256    96     
-80    -128   
48     -32    
144    -64    
32     112    
0      144    
-128   -448   
112    64     
48     176    
32     96     
-48    112    
96     112    
-176   -128   
384    -80    
-368   -208   
240    176    
-240   128    
-80    112    
-16    112    
160    576    
64     -176   
80     16     
-176   304    
-288   -816   
64     -176   
176    -16    
48     64     
-32    16     
48     176    
-32    -16    
112    80     
112    -304   
0      -112   
16     -368   
64     0      
16     48     
240    -80    
-176   64     
32     -448   
96     80     
-48    160    
96     160    
240    192    
48     160    
-192   256    
-16    -32    
160    -48    
-32    128    
48     -64    
-80    176    
192    224    
-224   -48    
128    128    
64     -32    
144    32     
-96    -352   
32     48     
-16    -32    
240    128    
0      64     
64     0      
-64    16     
192    176    
-48    -48    
80     -32    
80     112    
-16    -176   
96     48     
-176   -352   
128    64     
0      80     
-16    -128   
-32    -160   
176    32     
-64    16     
160    64     
-64    48     
32     -80    
-112   -144   
144    -80    
64     192    
16     -96    
-176   16     
48     -112   
352    160    
-128   -352   
112    80     
-48    -1664  
128    -16    
-48    -32    
96     96     
80     0      
-128   -96    
192    80     
-16    -16    
96     96     
0      -48    
48     112    
80     -272   
32     16     
96     -224   
128    112    
-16    80     
80     32     
-80    112    
240    64     
-144   -16    
176    64     
-16    -32    
0      -304   
208    112    
-32    16     
16     -32    
32     -96    
-16    176    
64     -192   
-64    48     
0      -160   
368    -16    
-80    -112   
96     -224   
-16    144    
-64    -240   
128    208    
80     -64    
160    176    
160    -160   
-64    0      
48     -336   
96     288    
112    0      
160    272    
32     448    
32     -240   
48     144    
48     -1456  
-32    -224   
208    -32    
224    144    
32     -32    
-112   -176   
224    -80    
-208   -480   
128    144    
112    416    
-48    32     
16     -1408  
-16    -48    
208    -752   
-192   -144   
-32    -400   
160    -128   
-352   -192   
48     -432   
16     -240   
128    -320   
80     -144   
-80    -544   
64     -48    
32     192    
64     -256   
-16    64     
192    112    
48     -16    
32     176    
-64    -32    
112    -256   
-128   -112   
80     -192   
16     -16    
-32    -96    
96     -64    
0      240    
32     -624   
-48    -2752  
80     128    
80     -16    
-192   96     
16     -336   
144    96     
64     416    
-96    0      
-240   -352   
176    64     
-1168  384    
-32    256    
-64    -128   
160    -80    
-96    -272   
64     -1424  
-128   -160   
80     -176   
128    512    
-192   112    
96     -480   
-320   32     
64     -80    
-96    -160   
288    -112   
-672   -288   
-128   -96    
96     -352   
416    -32    
-80    480    
304    -96    
112    112    
48     -240   
-16    -16    
160    -192   
-128   -288   
144    32     
128    176    
48     -48    
-32    -224   
-128   144    
96     32     
-240   -128   
-192   -304   
240    -256   
112    272    
0      176    
-256   -1360  
48     -672   
64     -128   
48     384    
-48    496    
176    -32    
-176   -32    
176    64     
64     144    
-32    96     
-416   -912   
384    -240   
208    816    
-384   -480   
320    -576   
-112   -464   
272    208    
-192   32     
144    160    
-464   -432   
128    -496   
144    240    
-288   -96    
64     0      
48     32     
16     48     
0      112    
80     16     
-32    -336   
112    -48    
144    48     
32     208    
-736   -192   
96     -192   
-224   96     
-64    -336   
-160   -192   
160    80     
-288   -48    
224    128    
-144   -176   
64     -144   
0      128    
160    -224   
240    320    
-128   -224   
384    304    
-720   -176   
304    -96    
64     16     
64     112    
80     -128   
48     192    
96     272    
-80    -176   
224    224    
-64    64     
208    -112   
-96    -256   
128    176    
-48    -80    
-448   -208   
128    432    
-176   -80    
-48    -32    
-1472  48     
-48    -48    
-32    128    
96     32     
-16    -544   
-64    -144   
80     0      
128    128    
-48    -64    
80     -16    
-112   -144   
96     160    
96     208    
-272   -176   
-80    -112   
-640   -32    
-32    16     
144    288    
80     -32    
-112   0      
240    256    
-176   -160   
64     160    
208    -80    
-352   48     
224    -96    
-160   32     
96     -32    
-80    80     
48     48     
-144   -32    
272    304    
-320   224    
-128   96     
64     240    
176    176    
-112   -80    
64     96     
48     -48    
0      -48    
-16    16     
-32    16     
48     48     
-16    80     
176    304    
-128   16     
16     112    
32     -48    
-112   -192   
-1120  -224   
128    48     
16     112    
144    144    
48     16     
-160   -32    
48     160    
16     0      
-96    16     
80     112    
-144   16     
-144   -64    
32     16     
-192   -176   
-64    96     
-320   -64    
128    -16    
-176   -112   
208    160    
-64    -16    
-176   -96    
-16    32     
-64    48     
96     -32    
-208   16     
240    0      
-352   -80    
160    96     
-192   16     
48     128    
-96    64     
-64    80     
-144   -96    
-96    -256   
-112   -320   
16     96     
80     672    
32     304    
-144   80     
-144   16     
-64    144    
32     48     
-160   -192   
0      0      
-208   128    
-96    -32    
-112   -32    
160    -144   
-64    240    
16     128    
-192   -144   
224    -112   
-208   -368   
0      -96    
-144   144    
16     -16    
64     0      
-16    -16    
80     176    
16     64     
-288   -96    
-80    64     
-80    160    
-32    80     
-224   96     
208    352    
240    272    
32     0      
32     48     
176    48     
16     144    
112    80     
-64    128    
-32    -32    
-64    0      
-144   -144   
496    80     
-240   64     
160    -144   
-48    0      
128    -16    
-16    0      
-96    0      
0      -80    
-32    16     
64     176    
32     96     
-64    112    
-96    16     
128    112    
0      32     
-64    -32    
288    176    
-352   128    
272    80     
-464   144    
224    -48    
-208   -16    
144    112    
-176   -144   
144    -112   
-208   64     
624    160    
-528   64     
400    128    
-432   -112   
-48    160    
-32    64     
32     64     
80     64     
-48    64     
-192   64     
160    -64    
-144   -16    
112    64     
208    208    
-272   128    
112    160    
-160   32     
128    96     
-48    96     
-64    192    
128    0      
-112   -16    
192    160    
-160   -96    
0      48     
-16    16     
48     96     
112    80     
16     48     
64     0      
32     144    
112    -16    
-80    -48    
192    80     
-48    128    
128    112    
16     -16    
32     48     
-48    208    
176    304    
32     192    
0      -16    
-96    -96    
272    256    
0      176    
-128   112    
-112   -96    
112    -144   
144    64     
144    336    
-96    240    
48     128    
0      -48    
128    160    
32     0      
-32    144    
224    432    
112    -48    
-16    96     
-96    304    
288    448    
64     208    
112    48     
176    256    
-32    240    
0      32     
80     112    
48     64     
96     80     
0      -16    
96     -16    
96     112    
-16    80     
128    64     
16     80     
112    80     
0      112    
0      -144   
160    176    
80     -704   
64     -32    
-128   272    
128    -240   
-64    -48    
176    592    
-176   -112   
256    96     
-208   496    
208    -80    
-272   160    
240    128    
-80    80     
160    80     
-16    -128   
32     -752   
64     160    
176    144    
-80    0      
96     0      
80     176    
64     96     
-64    -64    
64     -80    
112    80     
0      -48    
112    -80    
32     112    
176    -16    
-32    144    
-80    -496   
112    -192   
96     -240   
144    192    
-112   -176   
96     -288   
16     -64    
48     0      
0      64     
-48    128    
144    80     
-80    0      
96     112    
-32    -208   
64     96     
64     -320   
48     80     
64     -224   
32     96     
64     128    
0      64     
-64    -96    
144    64     
240    256    
0      128    
176    80     
64     64     
-32    176    
160    -64    
-16    -16    
240    -112   
-336   -176   
288    -992   
208    368    
0      -1216  
384    -16    
-48    208    
208    336    
48     96     
112    272    
272    -256   
-160   -496   
336    -32    
240    160    
96     624    
-64    -96    
64     -112   
224    -320   
-400   -320   
416    -512   
368    48     
640    544    
-544   -400   
288    -16    
128    80     
144    80     
16     240    
-208   192    
-80    -352   
80     288    
-80    -352   
-208   -224   
-96    -240   
176    112    
-240   96     
304    -112   
112    256    
160    -1760  
-240   -592   
192    80     
112    240    
-192   -512   
144    16     
-400   -736   
432    304    
-160   208    
48     -112   
192    -272   
-80    288    
192    112    
32     -1648  
-96    192    
416    -128   
-320   -48    
176    -48    
176    80     
-32    -128   
-112   -656   
-48    -256   
-48    -208   
272    1008   
-192   -32    
-224   -784   
144    160    
192    112    
160    304    
64     128    
-64    -208   
240    384    
-1440  160    
128    -32    
-80    -480   
0      -720   
240    32     
80     32     
304    384    
-16    160    
48     -352   
-64    128    
32     64     
-16    -64    
0      160    
-240   160    
176    80     
-864   -80    
48     -16    
48     64     
-48    -112   
-16    -32    
-16    -480   
-32    -96    
16     -1680  
48     112    
32     0      
-48    48     
-16    112    
192    64     
-48    80     
112    112    
-176   192    
128    16     
-800   -64    
96     -112   
64     -288   
112    -320   
224    16     
176    -1216  
112    96     
80     80     
112    64     
112    48     
-16    -416   
64     -464   
-48    80     
-16    -16    
-144   -128   
-880   48     
-16    -240   
96     -32    
80     -224   
-32    -48    
80     160    
-48    48     
144    112    
128    0      
-176   -64    
272    80     
-192   224    
112    176    
32     -32    
32     -112   
-192   -112   
16     -256   
-816   0      
-64    -64    
192    16     
-192   -400   
256    -304   
-96    -1184  
560    432    
-448   64     
80     -112   
208    32     
256    176    
-352   -48    
0      -112   
112    96     
-16    -112   
-48    80     
176    -176   
-16    -32    
32     -240   
160    112    
-16    -176   
80     112    
0      48     
128    32     
-464   0      
48     -80    
-288   -16    
128    16     
-112   0      
128    112    
-272   -16    
96     -144   
-64    80     
-32    -272   
48     80     
64     -160   
64     64     
144    64     
-224   -64    
64     -144   
-208   -112   
112    -16    
-128   96     
-176   -16    
96     -64    
-176   -64    
-112   -192   
400    208    
-96    16     
-48    240    
0      240    
-1328  16     
-128   -48    
-64    -48    
16     64     
16     16     
96     -16    
-112   -224   
-80    -224   
16     -288   
48     144    
-128   16     
-16    144    
-384   -16    
48     112    
-272   -128   
-352   -96    
-48    32     
-400   64     
-112   0      
-1568  -64    
-80    64     
80     80     
-176   96     
112    80     
-176   16     
-160   80     
-64    0      
-288   -384   
-192   192    
16     -80    
-192   48     
208    48     
-272   16     
-272   -416   
-128   -16    
48     208    
16     208    
-208   0      
-144   80     
-192   208    
-48    -208   
-208   -64    
96     -32    
-64    144    
-128   96     
-96    0      
-80    -16    
-176   -160   
-32    -304   
-208   80     
16     128    
-208   -16    
-64    112    
128    -320   
-160   128    
224    -112   
-224   -112   
160    -240   
-80    208    
16     0      
48     16     
-80    32     
-32    0      
-112   32     
96     96     
-320   80     
-48    -96    
-176   160    
-1008  -32    
64     64     
-128   0      
80     -32    
48     16     
-64    96     
304    288    
-336   64     
256    96     
-224   64     
80     96     
-208   48     
32     0      
-208   16     
-80    80     
-512   192    
80     96     
-144   -144   
-16    80     
144    -112   
96     -128   
192    144    
-32    256    
-208   80     
48     64     
-32    272    
32     0      
-240   48     
96     64     
-48    96     
-544   -128   
16     64     
-48    288    
-48    80     
-336   -48    
240    160    
-80    112    
-48    96     
0      -16    
-416   96     
-32    -48    
-176   -16    
48     32     
-160   -96    
48     288    
-416   -240   
-96    -64    
192    0      
-112   112    
0      144    
64     -336   
-32    112    
208    432    
-192   160    
32     -192   
320    592    
-352   -240   
224    112    
-160   352    
-48    -608   
112    464    
192    -112   
-224   -32    
16     336    
48     128    
0      -224   
96     64     
-224   -752   
32     384    
256    -128   
-96    512    
-80    -128   
-112   -272   
-48    96     
80     64     
-192   32     
0      64     
-32    112    
256    48     
-240   16     
128    0      
-80    48     
48     96     
16     96     
288    160    
-320   -192   
-16    -160   
16     96     
0      256    
-32    112    
-80    -112   
-16    112    
32     80     
-16    288    
176    192    
-80    240    
80     240    
0      -176   
32     -32    
0      -128   
0      0      
-16    -64    
16     -32    
0      64     
32     160    
0      32     
-112   48     
96     32     
-192   -144   
-48    -432   
-32    -80    
64     64     
16     80     
-32    160    
0      64     
32     192    
-96    192    
-16    -144   
-208   -336   
48     144    
-304   -288   
96     64     
96     144    
64     96     
-32    0      
80     80     
-64    96     
96     0      
48     224    
80     128    
128    128    
-144   -48    
96     112    
-176   -16    
112    -1920  
-48    112    
128    176    
-96    160    
352    352    
-160   64     
-32    -112   
-48    80     
160    -64    
64     224    
128    160    
-128   0      
-32    -112   
-64    432    
192    -288   
-192   -384   
176    112    
-32    16     
32     288    
64     80     
16     -32    
112    48     
-128   496    
304    192    
-64    16     
96     480    
64     16     
16     -128   
-64    80     
48     -16    
192    176    
-304   -272   
176    336    
-208   -496   
-64    -96    
-112   32     
48     496    
0      -144   
-48    -96    
176    336    
-80    80     
320    144    
-48    -368   
208    16     
-208   64     
64     -608   
-48    64     
-16    -240   
-16    32     
176    112    
64     240    
-192   -32    
160    -16    
-128   96     
64     -416   
-192   64     
320    336    
48     160    
-32    -208   
-32    160    
320    480    
-16    288    
-112   -16    
256    80     
-176   16     
240    80     
96     0      
112    -16    
-112   -288   
416    -400   
64     -176   
528    32     
-144   80     
176    -32    
-128   128    
144    -16    
128    80     
80     -496   
192    0      
80     -736   
64     -16    
176    -96    
272    352    
-32    240    
352    624    
-352   400    
64     240    
-80    32     
208    -112   
304    272    
-272   -112   
80     16     
112    -400   
432    416    
-544   -320   
256    64     
-112   128    
288    192    
-224   112    
112    96     
16     64     
176    208    
-112   128    
144    144    
-64    80     
112    -144   
80     80     
160    -432   
32     112    
-16    -112   
80     224    
112    0      
-48    48     
96     -16    
256    352    
-112   96     
48     -112   
-16    80     
112    -960   
16     96     
288    -224   
-128   32     
128    -16    
-32    -128   
240    -160   
32     208    
-64    -16    
-64    160    
144    32     
-64    -48    
16     -80    
192    112    
-144   96     
176    32     
96     192    
-32    -32    
-96    128    
160    -112   
112    96     
-16    -96    
0      128    
192    256    
32     128    
-16    -16    
368    -2352  
48     -16    
0      -80    
208    -864   
256    -144   
-128   240    
-144   -464   
256    192    
80     0      
-16    112    
-16    -16    
16     128    
128    48     
-112   -592   
-32    32     
32     -272   
128    32     
112    -32    
288    112    
-48    -112   
-112   -1392  
256    -272   
32     208    
-32    -64    
112    112    
96     -16    
-16    -736   
48     16     
144    -288   
-96    96     
-48    16     
-48    64     
-1584  0      
-64    -96    
144    -80    
112    80     
-80    -128   
0      -16    
448    240    
-224   80     
-96    -144   
176    -208   
-64    48     
128    48     
-16    0      
-32    0      
-128   -320   
-736   -64    
-80    -96    
-128   112    
304    -48    
32     16     
128    -672   
16     -112   
96     -1328  
16     -112   
64     -128   
-48    -48    
-16    -112   
0      -16    
-272   -112   
112    -192   
-448   -64    
112    -48    
-208   32     
64     32     
16     -112   
0      -128   
-288   -128   
144    -976   
144    128    
-80    48     
128    64     
176    -48    
-96    -144   
256    80     
-32    -16    
-112   192    
64     80     
-1232  -16    
96     -32    
0      -16    
32     -224   
96     48     
80     -432   
96     192    
128    -208   
112    80     
-144   -80    
-48    -352   
80     64     
64     0      
144    112    
-96    -48    
-32    0      
-16    -256   
-224   -48    
192    176    
-64    48     
-368   -704   
32     -224   
160    -272   
-48    112    
-144   -48    
96     -208   
-80    -32    
64     -16    
-544   96     
-16    -128   
-336   -112   
64     -32    
-80    64     
-32    -128   
32     0      
64     -336   
32     -80    
112    -432   
64     32     
-208   0      
0      32     
-192   -64    
160    -64    
-528   -528   
272    -208   
-64    176    
224    192    
-320   -240   
-144   -336   
144    16     
-64    -336   
48     160    
80     -320   
0      -16    
-64    -48    
64     -64    
-64    80     
128    -48    
-176   -128   
224    -96    
176    80     
-96    -48    
-800   96     
0      -112   
-48    48     
32     64     
-80    208    
-192   0      
-432   -208   
144    48     
144    -32    
16     496    
176    -16    
-192   -352   
16     -528   
-32    -432   
224    -80    
-48    16     
-512   -544   
320    144    
-576   -128   
0      112    
-80    -16    
-64    0      
-48    32     
-144   -80    
80     144    
-640   464    
-32    208    
0      -48    
-208   -112   
-352   -48    
192    -224   
-304   256    
16     240    
-192   -160   
144    -160   
0      224    
-192   144    
48     -176   
-112   144    
-48    112    
-240   -32    
-64    -144   
-48    96     
128    320    
-304   32     
256    176    
-128   64     
224    176    
-176   -96    
96     16     
-64    -16    
-48    176    
112    32     
-304   -64    
-16    48     
-32    -16    
128    80     
-640   32     
-32    64     
-96    -224   
-48    64     
-80    -128   
0      80     
-128   112    
272    -16    
-288   -80    
256    -240   
-192   -64    
64     144    
-64    384    
96     64     
-32    -16    
-224   32     
208    -96    
-912   -96    
64     48     
-16    64     
-16    -192   
-64    -112   
32     -16    
-128   -48    
-128   0      
-176   16     
64     128    
-80    96     
-224   -48    
128    80     
-496   32     
96     32     
-1088  -80    
208    64     
-48    -96    
32     16     
64     336    
0      -32    
-160   -272   
-128   -640   
48     48     
-240   -32    
64     -240   
16     128    
-64    80     
-176   -16    
64     96     
16     160    
-64    256    
-176   -16    
96     -272   
176    -64    
112    144    
64     32     
48     80     
-16    32     
-48    128    
176    96     
48     416    
0      208    
-272   -304   
256    -32    
-256   64     
-32    -16    
48     -32    
96     336    
-32    -64    
-80    16     
624    688    
-768   -336   
224    -48    
-336   -416   
384    96     
-112   80     
112    -96    
32     320    
-176   -464   
-144   176    
192    288    
-112   -336   
144    128    
-32    96     
-64    -16    
-208   -112   
-96    0      
176    400    
-192   208    
-128   -96    
-176   -96    
-160   48     
-48    160    
192    336    
-80    80     
-32    32     
-80    -400   
-144   -272   
176    -48    
-48    64     
144    112    
-96    48     
560    1056   
160    464    
-176   16     
-160   -144   
160    -48    
-112   -80    
-32    -48    
-16    -64    
368    144    
-208   176    
48     -64    
-16    0      
224    112    
-96    64     
48     16     
0      112    
-256   0      
48     -80    
-96    48     
192    528    
208    -112   
128    192    
96     160    
-224   -96    
-96    112    
384    16     
-272   64     
432    -32    
-192   128    
336    0      
-400   112    
256    32     
-112   32     
64     16     
64     128    
-240   16     
128    96     
-80    96     
80     64     
-16    64     
-160   -48    
320    48     
-352   144    
96     48     
-112   48     
288    144    
-96    240    
-96    144    
80     32     
-96    -128   
-16    -64    
-80    -800   
96     16     
80     128    
-48    48     
0      -80    
-48    16     
-240   -112   
-48    64     
32     144    
-16    32     
-32    80     
112    64     
-208   0      
48     0      
80     48     
32     -608   
48     128    
-16    16     
48     0      
128    32     
144    208    
-96    32     
144    80     
80     96     
176    48     
-224   -48    
160    48     
-16    -192   
-128   240    
336    16     
-144   -1264  
64     112    
64     64     
16     80     
-48    -112   
-32    -16    
208    16     
-32    144    
176    0      
-144   160    
176    -176   
64     144    
128    128    
48     0      
-112   -48    
256    -112   
-32    48     
608    336    
-592   176    
224    -32    
80     160    
32     64     
32     48     
-160   -96    
48     -176   
64     -48    
32     144    
-48    -160   
80     16     
0      176    
0      -160   
16     48     
32     -496   
-48    32     
160    192    
32     -16    
-96    16     
400    368    
-240   48     
-96    240    
128    48     
-16    32     
-16    16     
32     -80    
64     256    
144    -64    
0      64     
32     -496   
128    144    
0      -480   
0      144    
112    16     
-48    80     
80     128    
-16    128    
32     64     
48     48     
112    96     
-32    -112   
48     32     
128    16     
-48    16     
-48    -400   
208    -16    
0      -80    
0      16     
-112   64     
448    32     
-160   80     
-32    96     
224    32     
-16    0      
64     32     
176    -96    
-112   96     
16     -352   
144    64     
32     -176   
144    48     
-32    -336   
80     64     
-192   -1136  
384    112    
-240   -16    
160    96     
-32    112    
-32    32     
176    96     
80     -96    
144    64     
16     -256   
96     96     
-80    -176   
240    -16    
32     -272   
176    128    
0      160    
272    192    
-176   -48    
256    256    
-96    112    
-48    -528   
80     32     
-160   -400   
128    -64    
224    16     
-16    80     
32     -96    
192    288    
-96    80     
-48    288    
-32    352    
128    32     
0      -208   
384    -944   
-160   272    
112    -240   
48     -608   
432    304    
-32    0      
48     -224   
64     32     
-144   -608   
0      32     
160    -192   
64     -576   
-64    112    
32     -592   
96     64     
16     -592   
144    176    
48     32     
48     -16    
-96    48     
272    -352   
256    96     
240    224    
96     48     
-176   304    
192    320    
-128   -320   
336    416    
-32    160    
-144   224    
-272   0      
240    16     
-416   256    
-160   160    
80     -272   
-160   -192   
144    64     
80     -336   
48     -16    
-32    -288   
-208   -368   
544    112    
-192   160    
192    96     
0      400    
-32    -112   
80     -208   
-1248  -112   
80     -80    
-64    192    
-96    -224   
80     240    
48     -400   
80     256    
-80    -2320  
-352   -80    
64     224    
-176   -336   
240    -192   
16     176    
-64    -32    
-96    -64    
-256   -48    
32     48     
-768   16     
96     0      
48     -16    
32     -336   
-48    -80    
16     -1568  
48     -80    
176    96     
-32    112    
-240   -352   
48     336    
-32    48     
-48    -288   
80     -112   
176    -32    
-528   224    
48     0      
224    304    
160    304    
112    336    
64     -304   
-144   -16    
176    -160   
-128   112    
160    48     
64     224    
-32    144    
-16    -240   
32     752    
176    128    
-720   -16    
224    -32    
-720   96     
272    -128   
-32    16     
16     -192   
0      32     
64     -1072  
128    -32    
-192   80     
128    0      
-96    32     
80     16     
-288   -48    
64     96     
64     400    
16     16     
-256   16     
288    -320   
-112   32     
128    -16    
32     80     
48     272    
112    -16    
-96    192    
-208   16     
-160   -656   
176    -176   
-224   -48    
0      -384   
80     16     
48     80     
-192   -16    
0      -32    
304    288    
-16    -48    
96     176    
80     -32    
-32    -128   
-48    -32    
32     96     
-32    -192   
112    -112   
-128   144    
640    464    
-576   32     
112    -416   
-608   -560   
128    -240   
560    1168   
-576   -272   
112    -816   
-240   -96    
-336   48     
-176   64     
64     32     
-80    192    
48     64     
-144   -112   
0      -16    
48     -112   
-928   128    
112    -112   
-432   80     
128    224    
-368   -160   
-288   -112   
-80    160    
-208   -128   
304    304    
-400   160    
64     -112   
-1344  128    
-144   272    
48     16     
96     96     
-432   96     
432    384    
-240   272    
144    512    
80     96     
-32    160    
-32    -80    
-224   0      
-80    -32    
16     32     
-208   0      
-560   -32    
-192   -240   
256    80     
0      176    
-320   -48    
32     0      
-112   -304   
208    176    
-48    144    
64     160    
256    224    
-400   352    
128    -80    
-448   -176   
160    48     
112    112    
-240   64     
-176   48     
-48    144    
-32    -32    
48     48     
-576   -832   
144    -288   
208    208    
-16    -32    
-48    -32    
64     80     
-80    128    
32     64     
-96    0      
0      -208   
-48    -128   
-32    -16    
-144   80     
-144   -128   
112    128    
32     48     
48     80     
0      144    
-208   0      
-224   -256   
128    -304   
112    -128   
-144   -192   
48     128    
-208   -80    
-176   -112   
-576   -80    
160    112    
-1312  -128   
-96    0      
48     32     
-32    -48    
-272   -96    
-16    -80    
160    -112   
128    -16    
-80    -16    
112    112    
-48    0      
-128   0      
-64    -224   
208    32     
-144   64     
-64    -16    
128    16     
32     -48    
16     -144   
16     64     
304    64     
-96    32     
192    32     
-16    0      
16     0      
32     96     
-160   -128   
-48    -112   
-192   -112   
128    224    
-512   -160   
32     144    
80     0      
-32    128    
144    192    
-240   64     
48     32     
-128   -32    
80     64     
144    144    
48     208    
-112   -80    
-16    112    
-96    -64    
-176   112    
-32    -48    
-128   80     
64     48     
80     -64    
-96    112    
256    96     
-320   -48    
-32    160    
272    64     
-48    80     
16     32     
-144   -16    
128    80     
-208   -80    
64     336    
288    -48    
-224   -272   
288    160    
-32    64     
32     64     
-128   48     
144    48     
80     80     
-80    80     
48     48     
64     176    
-336   -80    
48     0      
0      112    
64     144    
-176   16     
48     -224   
304    128    
-384   -16    
128    112    
0      0      
-112   -16    
64     240    
112    96     
-48    0      
-16    -32    
-16    32     
48     304    
144    320    
-32    144    
48     -144   
0      -240   
144    80     
96     80     
-80    32     
160    80     
0      112    
48     80     
-96    32     
0      0      
176    -64    
-96    32     
208    144    
0      16     
-96    -48    
176    -16    
32     96     
96     144    
-16    96     
32     -144   
-96    -128   
112    80     
-80    48     
96     64     
-16    32     
128    96     
32     -32    
16     112    
-64    -176   
16     320    
48     144    
48     -32    
80     64     
128    32     
-128   48     
64     80     
208    96     
16     160    
-112   -32    
128    -176   
-16    112    
64     -16    
-32    -96    
48     144    
288    -112   
16     64     
-80    112    
272    352    
-32    480    
-32    176    
272    -80    
-176   192    
208    128    
16     208    
-80    96     
32     48     
-112   -80    
96     -16    
-96    -16    
16     -336   
-192   80     
-48    32     
-144   -208   
32     128    
0      112    
-112   -80    
-16    -64    
48     -176   
-64    80     
112    -176   
112    -384   
32     -176   
96     -992   
-32    -336   
176    -832   
128    48     
32     -48    
64     112    
48     176    
-144   -96    
80     -160   
240    240    
16     80     
96     208    
-16    64     
192    304    
-96    112    
-32    -976   
-128   -96    
352    144    
-160   -240   
96     -1184  
80     336    
16     64     
80     -32    
-160   -288   
304    208    
-32    -208   
272    -240   
64     368    
-32    -368   
192    480    
-64    -16    
32     192    
-160   48     
-48    32     
224    -720   
-272   512    
368    -1456  
-144   848    
320    0      
-80    -240   
-144   80     
80     16     
48     80     
48     16     
336    192    
160    448    
-48    144    
160    -416   
-96    -96    
432    -736   
-128   272    
96     -416   
160    -80    
-80    384    
-112   -176   
336    -80    
32     416    
48     256    
112    176    
-128   144    
32     -464   
96     336    
96     64     
16     -16    
80     -112   
160    -176   
16     96     
256    48     
-272   96     
304    112    
-64    80     
96     112    
112    64     
-144   -224   
-16    -416   
64     -496   
64     576    
192    16     
0      -64    
0      224    
240    160    
-256   -192   
160    16     
0      -192   
128    528    
96     64     
-96    0      
32     -224   
64     -720   
176    176    
-80    0      
-16    -64    
192    -256   
-16    32     
384    -48    
-304   240    
112    -224   
-144   -80    
144    -336   
112    -288   
48     256    
48     -656   
176    -992   
-32    -144   
-48    -304   
208    -32    
144    144    
0      -176   
64     144    
96     -96    
64     64     
16     0      
80     -528   
256    192    
-32    -64    
-112   320    
-272   272    
-160   -32    
16     -160   
0      -880   
352    1056   
-160   -320   
0      -848   
224    320    
-32    224    
48     48     
304    272    
-160   -160   
-160   96     
176    -240   
-96    272    
-256   -224   
112    256    
96     144    
0      -224   
32     -288   
32     -656   
160    192    
-192   -864   
160    144    
-48    -16    
-16    0      
48     -112   
-80    48     
288    128    
-336   -688   
96     32     
32     192    
-464   96     
128    -336   
16     -240   
240    -144   
-176   48     
160    -432   
48     -240   
192    -1104  
-208   144    
128    -256   
128    -288   
-80    -32    
256    16     
-224   -64    
320    32     
-224   80     
32     64     
-544   -400   
-32    -368   
288    -160   
-112   -80    
80     0      
-48    272    
96     224    
-16    96     
32     144    
-224   -192   
176    -96    
-480   -256   
400    -192   
-48    16     
0      0      
-704   -48    
-96    -352   
-416   -32    
32     -192   
64     96     
64     -176   
16     0      
96     -176   
288    32     
-432   -64    
464    32     
-304   0      
304    96     
-288   0      
240    -112   
-640   -160   
224    0      
-528   -416   
336    16     
-32    160    
-80    -208   
144    240    
-96    -528   
176    48     
-176   32     
48     -96    
-224   48     
352    192    
-704   128    
64     176    
0      -80    
-48    -128   
240    -16    
192    -32    
0      64     
-64    -304   
-32    64     
-64    -576   
-64    112    
-128   224    
160    208    
-144   176    
160    112    
-176   -16    
-32    32     
208    144    
32     144    
96     128    
112    -240   
-112   -80    
0      -208   
-16    -16    
-64    -64    
-64    -80    
-256   -16    
-64    80     
-224   -160   
-16    16     
-272   -48    
0      160    
-80    80     
160    32     
-144   80     
-192   -48    
336    320    
-544   144    
-96    144    
240    160    
-1072  80     
-32    32     
-352   144    
240    80     
-112   -32    
176    -32    
-48    -64    
80     0      
-16    -80    
208    160    
-144   -32    
128    96     
48     -64    
-240   -96    
48     16     
0      -64    
96     32     
-256   -128   
336    432    
-1616  48     
-64    -32    
48     -64    
192    80     
-368   -112   
-128   48     
-96    -48    
144    64     
-304   -224   
208    0      
48     80     
-96    0      
112    128    
0      16     
-64    -48    
-288   -16    
112    48     
16     48     
-160   64     
-48    0      
112    80     
-144   -112   
48     128    
-16    16     
-96    48     
176    112    
-208   112    
96     128    
-304   -48    
-272   -272   
48     -48    
-80    144    
112    0      
-96    96     
32     -144   
16     112    
-112   -288   
176    64     
-64    96     
176    48     
-240   96     
160    80     
-80    64     
-80    16     
-16    176    
96     176    
-112   224    
-464   -80    
-256   -272   
-80    -336   
80     96     
-16    0      
-80    48     
112    64     
-48    96     
96     480    
-80    96     
32     -112   
80     -64    
176    96     
-112   112    
-16    16     
-272   112    
112    64     
-464   192    
-64    -64    
-176   -208   
176    -64    
16     64     
-144   -32    
256    320    
-128   16     
-352   -576   
208    80     
-32    16     
96     160    
-240   -128   
32     48     
-32    -128   
-80    -192   
-64    -144   
144    -224   
-16    -48    
32     128    
-112   -80    
0      -48    
160    80     
16     48     
-272   -80    
32     240    
16     432    
-32    16     
-112   -240   
64     -16    
-592   -144   
176    64     
224    288    
-192   -96    
112    -16    
48     16     
-64    -64    
128    592    
-48    -160   
224    832    
-224   -128   
-128   -112   
-208   32     
-496   -592   
48     -176   
-176   288    
-128   160    
-32    48     
-16    112    
16     112    
-128   -544   
240    672    
-144   -128   
-64    -224   
272    -48    
-128   720    
-80    -208   
48     192    
-64    -96    
16     160    
-192   0      
272    -352   
-112   288    
-160   16     
16     -96    
-128   -144   
96     -128   
-64    256    
64     -128   
48     176    
-16    32     
-48    -144   
80     176    
128    80     
0      352    
-80    192    
64     -144   
112    96     
144    144    
-368   -400   
352    -688   
272    288    
192    688    
-96    208    
64     96     
64     320    
0      416    
16     176    
0      -272   
-48    -128   
-80    0      
0      128    
-176   32     
96     32     
-160   96     
-64    48     
48     -32    
-96    -240   
96     336    
112    416    
-112   256    
-96    192    
-272   -432   
-64    -160   
112    368    
240    752    
-400   -368   
320    176    
-208   272    
0      -288   
-32    48     
240    0      
-240   304    
96     -336   
-32    -192   
272    560    
-256   144    
96     -16    
96     32     
0      112    
-48    -48    
48     32     
144    224    
32     -32    
-160   384    
-80    -224   
208    -48    
-96    160    
96     -48    
48     256    
0      112    
-112   240    
-48    -112   
144    32     
-48    -272   
16     64     
32     80     
-16    64     
16     96     
-80    -32    
512    336    
-208   -128   
-144   -96    
-144   -608   
288    1200   
-96    272    
32     -720   
32     736    
80     640    
-48    -1152  
-32    -368   
16     -160   
192    320    
-176   480    
192    -864   
-208   -48    
304    32     
48     192    
-96    128    
224    -80    
-128   32     
0      576    
-64    64     
32     -64    
-128   -1136  
96     -288   
80     -1056  
192    64     
112    160    
-160   544    
32     -48    
432    128    
-160   -48    
96     64     
80     80     
112    112    
16     80     
64     -32    
48     96     
16     144    
320    496    
-144   64     
256    416    
-304   -48    
-48    -224   
192    512    
192    672    
-96    224    
208    416    
96     112    
32     -208   
112    176    
80     448    
112    272    
-96    -48    
208    80     
-16    -560   
48     48     
-16    -192   
64     160    
-32    32     
144    80     
32     32     
32     112    
16     -16    
64     -80    
-48    128    
64     0      
0      16     
80     -48    
80     64     
-80    -480   
16     80     
240    -176   
-208   64     
144    80     
-80    96     
144    -96    
-32    0      
64     32     
-64    -32    
144    80     
64     32     
112    96     
-144   -576   
416    128    
-240   -64    
272    112    
-16    32     
96     112    
-80    -48    
320    480    
48     304    
-128   80     
256    -144   
-160   -80    
208    80     
-160   -288   
192    -48    
48     -176   
144    240    
32     16     
0      176    
32     -384   
-16    32     
96     112    
48     208    
-80    80     
-64    16     
224    336    
16     0      
32     -64    
320    160    
-128   160    
304    272    
0      96     
48     -112   
176    80     
48     -160   
256    144    
96     48     
-176   -224   
208    272    
-816   -32    
80     -160   
0      32     
96     -272   
32     -32    
-48    -944   
256    16     
-80    80     
320    272    
-48    352    
48     352    
240    1024   
352    864    
-176   -80    
-16    128    
-352   -80    
224    48     
-16    -112   
192    -448   
96     -336   
208    -1184  
224    -192   
16     80     
224    -48    
0      0      
144    -64    
80     -128   
144    288    
16     -64    
96     -192   
-480   -384   
96     -144   
240    -288   
128    -192   
64     -16    
64     -128   
32     -112   
96     -304   
-80    64     
96     0      
-64    160    
-304   -112   
32     128    
-128   -64    
288    32     
-64    64     
-80    -112   
-112   -96    
-48    -224   
112    -32    
192    -64    
48     144    
224    -336   
-208   0      
192    384    
-64    32     
-192   -32    
320    48     
-144   80     
32     -80    
-352   -80    
192    -128   
-240   -128   
-48    -32    
192    32     
-96    -16    
160    176    
96     16     
-80    -96    
64     -656   
0      -256   
32     160    
224    112    
-128   16     
-16    -16    
-80    -48    
96     64     
-144   176    
16     96     
-912   32     
144    -96    
-208   -48    
160    -224   
-16    48     
208    -64    
48     112    
80     -192   
-32    -64    
160    176    
-160   16     
128    80     
-32    32     
112    48     
160    -64    
-288   -32    
80     -176   
-176   112    
192    -32    
-80    96     
112    -400   
192    176    
-112   -1488  
0      -112   
-128   96     
-160   -128   
-192   -144   
0      -272   
-384   -160   
32     -240   
-80    32     
192    -48    
-208   64     
80     -176   
-80    288    
272    -176   
-256   256    
336    -144   
-256   -32    
112    -16    
144    -64    
-208   320    
176    352    
-256   144    
96     192    
-32    16     
-16    -384   
112    144    
96     64     
48     336    
-64    -144   
144    -32    
-112   64     
32     0      
48     16     
48     192    
-80    -32    
96     -224   
32     272    
112    304    
-96    -128   
48     -208   
-80    -592   
-768   -224   
-160   -176   
-176   -784   
0      208    
-80    -432   
0      464    
-192   320    
-1168  -320   
-128   -32    
176    160    
-336   -112   
32     -144   
-160   32     
-1072  -112   
160    112    
-496   -48    
16     64     
-112   -384   
-352   -144   
0      16     
-192   96     
16     0      
0      96     
-48    48     
-640   48     
64     48     
-224   -416   
16     -112   
-144   32     
-48    -112   
-64    64     
-80    272    
64     112    
-48    112    
16     128    
-48    80     
-144   -80    
240    112    
-240   208    
-960   -208   
-80    32     
48     32     
208    416    
0      224    
-80    224    
208    0      
96     512    
224    304    
-16    80     
-80    80     
16     -64    
176    -64    
-112   176    
176    0      
-240   48     
-224   -112   
-1008  -144   
128    224    
-208   -240   
-48    -208   
-48    128    
80     64     
16     128    
256    96     
32     192    
144    32     
384    224    
0      640    
-16    400    
368    96     
-192   256    
-256   -160   
-64    80     
32     96     
0      96     
112    320    
-16    496    
208    -368   
-304   64     
-64    -80    
96     -160   
-160   -48    
208    -16    
-192   352    
352    -96    
-112   80     
-352   -80    
160    128    
48     -368   
176    320    
-128   16     
208    64     
-368   224    
96     -240   
416    496    
-416   304    
80     -288   
-368   176    
272    -224   
-224   -128   
-176   32     
192    -96    
-80    0      
-416   592    
-32    -272   
32     320    
-352   -624   
432    944    
-320   256    
176    -752   
16     672    
-112   -160   
80     208    
96     192    
-112   -112   
-16    208    
-304   -288   
224    128    
-672   -160   
-64    192    
144    64     
-80    -176   
272    80     
64     368    
32     240    
96     -16    
-64    -160   
32     336    
-16    272    
-96    32     
208    48     
-192   64     
-48    432    
-80    272    
-96    -64    
96     -80    
96     208    
96     48     
-112   -336   
-96    96     
-48    64     
64     176    
-16    352    
144    256    
-448   -640   
144    -64    
-176   -80    
-48    32     
112    288    
96     288    
-16    192    
32     80     
48     16     
128    192    
-208   112    
-96    0      
112    48     
-48    80     
208    -32    
-208   32     
48     48     
16     48     
-48    64     
80     96     
144    208    
-160   80     
144    304    
-304   176    
-112   160    
16     176    
0      160    
-96    -64    
-176   -48    
256    112    
-224   48     
320    224    
-352   0      
16     64     
-16    64     
32     112    
-96    -64    
-64    48     
128    -112   
-160   16     
16     80     
-80    80     
-96    -16    
112    112    
16     32     
-144   80     
48     64     
-64    -112   
48     96     
208    -80    
-208   368    
128    64     
-224   64     
160    -16    
64     64     
0      32     
16     80     
-64    32     
32     128    
128    176    
-240   -176   
176    48     
80     64     
-64    0      
0      32     
112    96     
-32    80     
0      128    
64     80     
-48    16     
-64    -48    
96     144    
224    192    
-128   176    
32     224    
96     272    
-16    -352   
80     96     
-48    -368   
-32    208    
256    288    
-32    -80    
32     -48    
-48    32     
208    48     
160    80     
80     -80    
64     -48    
32     -176   
128    0      
80     64     
-48    -208   
-208   32     
-80    -1216  
0      -176   
-32    -112   
16     112    
144    96     
80     16     
80     256    
256    368    
-96    48     
272    64     
-128   32     
160    80     
32     80     
96     0      
-128   0      
144    48     
368    144    
-96    -992   
96     -96    
80     80     
112    80     
-80    96     
224    160    
-80    0      
80     128    
-96    -64    
144    0      
48     -144   
128    -144   
-288   -416   
80     -624   
112    224    
160    -288   
-176   48     
384    192    
0      208    
-16    32     
-80    208    
336    208    
0      64     
-160   -128   
336    160    
48     128    
-144   -224   
32     32     
288    32     
0      112    
-128   -272   
48     128    
-144   -1600  
32     144    
16     112    
-32    64     
48     144    
-32    48     
48     128    
80     32     
-192   64     
208    112    
-192   48     
192    128    
-16    112    
48     -720   
80     96     
112    -48    
0      256    
48     128    
32     80     
32     -64    
-64    -96    
-16    16     
96     -32    
-64    96     
96     -64    
368    304    
-416   -96    
208    80     
-16    0      
176    128    
-112   -48    
64     80     
-128   -32    
240    224    
-96    96     
32     96     
64     112    
0      -112   
112    0      
-16    -32    
-32    144    
-112   -112   
128    144    
96     16     
240    192    
-304   -544   
272    64     
64     144    
16     112    
-16    -16    
80     32     
64     144    
-48    -368   
-176   16     
304    -144   
32     144    
0      -176   
16     128    
48     -128   
64     128    
144    -48    
-32    -608   
48     96     
112    32     
32     112    
-1600  -320   
0      -656   
448    528    
32     864    
-320   -544   
400    -416   
176    928    
32     -176   
-48    -400   
80     -560   
80     -32    
80     -112   
-16    64     
48     -384   
32     -304   
-112   -16    
64     -96    
80     0      
96     -144   
336    240    
-416   -1104  
336    128    
-240   -272   
272    -176   
-80    208    
16     256    
80     16     
-16    -32    
48     -272   
80     -352   
0      128    
-80    -16    
-64    -32    
-224   -240   
144    -496   
96     -176   
112    208    
0      -448   
96     -96    
144    16     
80     176    
0      -16    
0      -16    
-144   -336   
288    -112   
-208   464    
32     -128   
-400   -48    
96     -80    
-32    -144   
112    -288   
-16    -208   
48     224    
-64    96     
208    320    
192    416    
-208   32     
176    -48    
-224   32     
128    -48    
-272   -48    
240    0      
-432   -176   
304    -176   
-240   112    
224    80     
-128   -32    
144    -320   
-32    80     
64     -512   
-16    112    
-144   -240   
128    -608   
-16    -224   
368    -128   
-416   -240   
96     -144   
-192   16     
240    80     
-192   272    
128    32     
-192   -48    
128    -128   
160    0      
-48    -272   
32     0      
208    -96    
-64    -96    
-80    -16    
-144   -64    
288    256    
-144   112    
-384   48     
48     -288   
-256   -16    
80     -224   
-224   -176   
240    -400   
16     -160   
64     256    
448    64     
48     112    
240    528    
-208   -240   
144    -112   
32     96     
-16    -48    
-64    -256   
32     192    
-128   48     
0      -64    
-336   -528   
272    -96    
144    192    
-160   -64    
144    -32    
-48    128    
48     -16    
-48    32     
256    -96    
-128   128    
64     352    
-96    608    
144    -656   
112    496    
-80    -144   
-336   -32    
16     -208   
-112   -48    
608    -32    
-704   -688   
192    -96    
16     -192   
16     -448   
0      -688   
-160   80     
304    336    
-80    112    
-160   -400   
160    -256   
-416   -368   
160    384    
-1456  208    
0      816    
-64    256    
-128   112    
240    256    
-416   96     
-224   -96    
48     256    
-80    288    
112    32     
128    320    
80     -176   
-128   -240   
-352   -304   
96     0      
-80    16     
192    224    
208    208    
-432   -48    
16     96     
-48    16     
-16    32     
-32    -64    
16     160    
-1664  -96    
-128   160    
64     96     
-64    -64    
-128   -304   
32     -240   
-64    -112   
144    288    
-176   144    
-80    -48    
16     -16    
-48    -192   
-64    -96    
-320   160    
160    80     
-464   -144   
-160   -96    
-64    -160   
80     16     
-64    -128   
48     112    
-176   -128   
32     144    
-144   64     
80     160    
128    96     
0      80     
16     -16    
-80    48     
80     64     
-352   -48    
32     48     
-592   48     
-80    48     
112    -64    
-32    80     
32     -96    
-272   -48    
432    64     
-128   128    
-32    0      
-64    -64    
-32    48     
112    192    
-112   -96    
-16    96     
480    608    
-1040  0      
304    64     
-384   -80    
208    -32    
-112   64     
176    -16    
64     16     
-16    64     
0      -48    
-192   48     
112    96     
-112   -16    
0      96     
-16    240    
0      192    
-640   -128   
80     144    
160    -32    
-16    80     
128    32     
-208   -32    
-48    32     
96     64     
-64    80     
-16    64     
-32    96     
176    192    
0      0      
-176   48     
160    112    
-144   -48    
112    48     
-256   48     
-32    64     
-64    -48    
-48    -32    
64     80     
-16    272    
224    144    
-192   -64    
160    112    
-16    64     
96     208    
16     -96    
176    48     
-224   -112   
-16    48     
-416   -176   
-16    -16    
0      -176   
-160   96     
256    16     
-112   -32    
96     -16    
-128   -160   
-32    -160   
-64    -48    
32     160    
16     80     
0      176    
-80    16     
96     144    
16     64     
-64    80     
256    80     
48     80     
48     48     
-16    48     
128    144    
-176   64     
-80    64     
32     32     
192    160    
-192   -48    
160    144    
-160   80     
-32    -16    
64     0      
32     0      
192    80     
0      112    
64     80     
-48    -32    
160    112    
-96    32     
256    -16    
96     16     
-64    0      
-112   -192   
176    224    
-80    -16    
-96    112    
80     64     
0      32     
0      48     
16     16     
-16    112    
64     96     
176    -16    
-160   192    
208    112    
-144   0      
112    48     
-80    -48    
-176   -336   
176    32     
112    192    
-288   -80    
224    144    
-64    256    
224    32     
-48    144    
96     144    
-48    16     
64     96     
112    80     
0      32     
-160   -48    
64     16     
112    96     
-96    80     
80     48     
16     80     
80     64     
0      -16    
176    224    
64     128    
-304   -16    
80     112    
-64    208    
288    48     
-192   32     
224    96     
-80    128    
-224   -64    
272    96     
160    176    
80     224    
64     160    
32     112    
-80    -16    
272    32     
-272   112    
160    80     
-144   96     
-96    -32    
64     48     
128    128    
0      -112   
-272   -528   
128    64     
128    -368   
96     128    
-192   176    
80     272    
160    272    
-192   -96    
176    -400   
96     64     
176    -32    
-64    0      
128    16     
-32    64     
80     -32    
-160   -528   
224    208    
112    -272   
192    192    
-16    96     
-32    -96    
-80    -16    
288    -288   
128    448    
-64    0      
-48    -224   
192    -160   
-240   144    
352    256    
-272   64     
416    0      
-144   160    
160    -416   
-16    96     
48     -688   
0      96     
96     208    
304    160    
-208   -80    
-144   64     
-64    -592   
144    -48    
0      208    
176    288    
-32    0      
-128   -288   
272    80     
-64    -736   
64     80     
80     -1360  
32     112    
16     160    
-16    48     
0      -16    
16     96     
-112   112    
240    -16    
-16    32     
0      -48    
144    -80    
-128   0      
144    0      
-112   0      
160    16     
112    -400   
-96    144    
160    -992   
128    160    
-16    -32    
144    304    
32     160    
224    80     
-80    -48    
160    -176   
128    112    
32     -32    
144    32     
-48    -720   
144    0      
-32    -496   
-32    -32    
80     -560   
96     96     
32     0      
48     160    
352    336    
-224   352    
-32    16     
-128   -256   
368    -112   
-96    144    
48     160    
-80    -480   
-16    -96    
144    -16    
32     128    
144    224    
80     144    
224    208    
-224   160    
96     -48    
-16    -192   
-32    80     
112    -176   
32     160    
112    -128   
0      80     
304    352    
176    880    
-192   256    
112    -224   
0      -400   
176    48     
16     -48    
192    224    
64     192    
48     -144   
-32    -1568  
-16    -96    
-288   -448   
128    -160   
64     656    
-112   -128   
-160   -288   
64     -832   
96     128    
288    640    
-160   -1600  
352    -496   
48     160    
352    176    
-304   -112   
192    -160   
0      -64    
112    -624   
48     -352   
64     96     
128    48     
-160   32     
-16    32     
-80    -2368  
176    -112   
128    -320   
112    64     
80     -304   
336    208    
-784   -224   
160    -736   
-144   -384   
80     -208   
32     32     
-48    -336   
0      48     
160    400    
-112   112    
-160   -64    
0      64     
64     16     
128    -96    
-48    -128   
96     -272   
-720   0      
96     16     
-272   -224   
-160   -224   
304    -144   
-304   -560   
208    0      
-112   -128   
-48    -96    
96     -96    
80     144    
176    -16    
-272   -224   
32     -96    
320    176    
-208   -80    
-16    32     
288    32     
-320   96     
16     -16    
-16    -208   
224    32     
48     192    
-144   16     
80     -384   
16     -80    
160    -128   
96     -352   
-16    -16    
16     -64    
-64    -96    
0      -128   
-96    -16    
-80    144    
-368   48     
48     -48    
48     -128   
176    -288   
16     16     
0      -640   
0      64     
160    64     
32     -64    
-208   -64    
112    -240   
-208   -64    
0      -288   
-368   208    
-192   80     
-448   -32    
-16    -240   
64     -80    
32     -816   
32     32     
96     -192   
-80    32     
-80    -16    
224    -192   
-368   -16    
160    16     
-304   -64    
80     64     
-80    80     
16     -16    
-432   -176   
208    -64    
96     48     
32     -176   
0      96     
160    -32    
144    32     
-336   32     
192    -32    
-432   16     
160    80     
-240   192    
64     32     
-48    48     
-32    -256   
-160   96     
192    32     
-32    16     
128    -160   
96     80     
-32    -656   
288    304    
-336   -16    
96     96     
160    16     
-16    48     
-160   -48    
32     0      
-64    144    
144    48     
-144   0      
288    -16    
-256   48     
160    -176   
-208   -128   
224    -368   
112    80     
-144   112    
112    112    
-240   -16    
208    80     
-112   32     
0      -32    
-112   144    
144    0      
-272   112    
-1600  -192   
-16    96     
-672   -128   
-128   144    
192    112    
-16    64     
0      160    
-592   -112   
-80    64     
-1152  -48    
-144   -48    
64     -96    
16     64     
80     -80    
-400   -32    
224    -208   
256    352    
-304   32     
0      96     
32     64     
-176   -32    
-32    0      
-448   -112   
-96    -48    
-160   -176   
240    192    
-1632  -48    
32     48     
48     -176   
-96    48     
144    -112   
-16    224    
-48    -80    
-96    48     
48     64     
-32    -32    
-96    16     
-192   128    
144    -16    
-80    144    
80     48     
-576   16     
64     -48    
-128   -160   
96     112    
256    336    
-448   304    
0      -240   
-160   -32    
128    96     
-112   -16    
-96    -32    
176    128    
48     128    
-80    -48    
-16    -32    
112    224    
-288   160    
-768   -16    
-128   96     
144    -112   
-80    128    
-48    32     
128    64     
-16    80     
-80    -32    
-32    32     
-112   32     
-32    16     
-96    -64    
32     64     
-128   -16    
112    48     
-608   -64    
160    64     
-144   -80    
480    512    
-368   272    
112    48     
-272   -112   
80     0      
144    96     
-112   272    
-80    256    
-160   176    
160    16     
-48    48     
352    272    
-720   -416   
368    -528   
-48    -176   
192    -592   
16     224    
80     176    
-32    16     
-80    -240   
96     -144   
128    240    
32     192    
-160   96     
32     -96    
48     0      
16     144    
-96    160    
-112   16     
-112   -48    
-272   352    
288    272    
-384   96     
32     0      
-48    48     
32     32     
-80    48     
-64    272    
-272   -64    
192    320    
-128   48     
80     608    
-144   -32    
192    -464   
112    64     
-80    -32    
-144   48     
112    224    
-64    32     
-112   112    
96     -80    
-96    0      
80     -16    
-80    208    
16     192    
48     -224   
64     0      
-64    256    
0      608    
432    -512   
-336   -160   
48     128    
160    64     
-128   -32    
0      -272   
0      144    
0      48     
-160   -544   
208    48     
16     416    
-80    -224   
144    -96    
-112   288    
192    464    
-64    80     
416    368    
-192   544    
-224   -224   
128    0      
-176   96     
16     96     
-16    80     
16     176    
32     48     
256    272    
-304   256    
128    64     
-176   -48    
160    96     
352    480    
-64    688    
64     48     
0      128    
144    128    
-176   -16    
320    112    
-64    64     
176    80     
-320   -48    
144    128    
-48    32     
32     80     
32     64     
32     96     
64     80     
-32    -224   
-160   -304   
0      -176   
304    16     
-224   48     
96     160    
-16    -16    
32     144    
32     32     
16     -16    
256    352    
-32    224    
64     80     
-256   -32    
304    544    
-96    240    
-64    -128   
80     -32    
160    32     
-224   64     
144    64     
-32    32     
96     0      
48     112    
48     112    
48     -144   
80     -416   
144    48     
-80    128    
160    96     
-80    112    
224    224    
0      336    
-208   -144   
16     -1024  
112    -608   
256    0      
192    384    
80     208    
112    96     
0      80     
48     160    
-32    64     
-48    -656   
128    176    
16     96     
-32    -64    
96     64     
-48    160    
144    96     
-16    112    
48     0      
0      -208   
-16    -512   
304    416    
-400   352    
400    -752   
-16    352    
-144   -1472  
304    -208   
48     352    
-80    -160   
0      -752   
368    -128   
-48    304    
256    320    
-32    -112   
64     416    
-240   -144   
192    128    
80     96     
-48    -128   
32     -112   
-48    -992   
112    32     
16     -400   
64     -32    
80     48     
224    208    
-176   -64    
112    128    
-112   304    
240    304    
-192   96     
400    448    
-288   496    
-80    -128   
112    -96    
112    -160   
0      48     
-144   -320   
176    96     
-272   -80    
928    528    
-336   432    
32     160    
-144   0      
160    48     
-32    -16    
-160   0      
64     64     
-144   -160   
0      -16    
0      -432   
-80    208    
320    -464   
-208   64     
160    -672   
64     128    
80     32     
224    240    
0      -64    
-160   240    
-48    -64    
128    -160   
96     176    
80     16     
-64    -32    
272    -160   
-192   112    
304    -256   
-32    -32    
192    224    
-224   32     
128    160    
-32    144    
32     16     
-16    64     
112    112    
208    80     
-144   384    
-48    -96    
32     112    
0      -336   
256    240    
80     -64    
0      48     
144    -64    
-16    -16    
160    -176   
16     -32    
240    80     
-32    -16    
0      64     
32     -128   
160    112    
64     -208   
32     160    
80     -96    
48     96     
112    -32    
-112   32     
48     -768   
48     -96    
-64    -16    
0      -1184  
48     16     
96     96     
64     -272   
256    16     
-176   -944   
208    64     
0      64     
192    16     
48     64     
128    -48    
-16    96     
208    -80    
-32    -336   
96     0      
304    176    
-176   -144   
-288   -64    
176    -592   
112    -80    
-192   -944   
240    16     
-112   -416   
272    -16    
-80    80     
176    -32    
-32    -352   
304    400    
-224   -112   
144    64     
0      16     
160    -64    
-1232  -64    
64     -368   
-16    0      
176    32     
-64    -176   
80     -1984  
-64    -240   
320    320    
-224   -16    
32     -176   
-112   96     
-96    -224   
-256   -144   
272    48     
-96    -128   
-416   -144   
160    80     
-16    16     
-16    32     
64     -176   
32     -208   
176    -64    
-160   176    
64     96     
-112   -96    
224    -16    
-32    -176   
32     80     
-16    0      
96     -32    
-96    48     
48     -96    
-288   -304   
224    -272   
32     -48    
-16    -192   
-64    -32    
48     -272   
80     80     
-32    64     
-48    80     
160    96     
-16    64     
-128   0      
0      16     
-480   112    
256    -208   
-960   -192   
208    -32    
-32    -160   
80     -176   
32     -96    
32     -208   
80     16     
16     -352   
192    208    
-128   64     
80     16     
-32    48     
0      48     
-80    -80    
176    -160   
-160   48     
336    96     
-944   -16    
288    -96    
-160   32     
80     -416   
80     80     
32     -544   
16     160    
112    256    
-240   -32    
0      -128   
240    16     
-96    160    
-80    64     
-96    16     
144    -144   
-80    -32    
128    -16    
48     16     
32     -128   
80     64     
240    48     
-96    64     
80     -64    
-112   -144   
-128   352    
-32    448    
-48    -176   
0      -336   
-160   -256   
80     -256   
160    224    
96     272    
-144   48     
96     -112   
176    32     
112    -496   
-48    -144   
-176   -64    
112    -128   
16     48     
-32    -32    
144    432    
-496   -304   
-176   -528   
0      80     
-32    64     
-208   -224   
16     -112   
-960   -192   
-16    -96    
-1072  -32    
-320   -48    
368    640    
-480   368    
0      304    
-16    96     
-272   -64    
32     -192   
32     48     
-48    272    
-112   144    
-112   -112   
-80    64     
-64    -240   
16     176    
80     48     
-272   -80    
96     -144   
-336   160    
0      -176   
-96    -288   
112    240    
-128   224    
112    -112   
-464   -112   
112    128    
-384   160    
176    -368   
-304   -304   
176    576    
32     -32    
-208   -400   
256    240    
-416   32     
80     -128   
-96    224    
192    -32    
-496   432    
-208   -176   
-416   -592   
96     496    
-32    -64    
80     -128   
-48    192    
-80    96     
-144   -48    
-272   -80    
256    80     
-160   48     
-112   -16    
240    112    
-176   0      
-640   -16    
80     32     
-32    -16    
48     144    
0      96     
256    208    
-96    -48    
-256   -288   
-176   -480   
-48    -80    
176    128    
-192   160    
0      128    
-144   -32    
-288   -64    
112    -272   
-176   -496   
-976   -512   
160    64     
-32    384    
-96    0      
48     -272   
144    224    
32     560    
144    304    
32     320    
80     176    
80     112    
-288   112    
-96    -16    
-16    -16    
112    192    
-592   96     
400    128    
-288   -32    
144    80     
48     96     
-64    0      
16     112    
-96    0      
0      64     
-144   -48    
16     80     
-64    16     
-80    144    
208    -64    
-16    224    
-544   -224   
32     -96    
208    224    
0      416    
96     48     
-144   80     
-128   -16    
-176   -688   
128    -464   
-144   -240   
272    224    
-16    -80    
-144   -192   
-32    -128   
0      144    
-192   48     
128    64     
-400   16     
128    400    
16     96     
64     432    
80     192    
80     0      
-208   560    
-32    -496   
144    16     
-304   32     
128    16     
-112   304    
240    1136   
128    752    
-464   -544   
-16    -800   
80     608    
-32    -112   
-128   -32    
224    160    
-96    128    
48     160    
0      -32    
240    80     
-208   -288   
-80    416    
-48    -32    
128    32     
-96    128    
-64    80     
160    112    
-112   -160   
48     -48    
96     144    
80     256    
-32    -112   
-144   -208   
-16    -32    
0      176    
-96    80     
-112   176    
-64    -96    
-32    32     
-336   -80    
-128   80     
0      112    
0      64     
64     176    
-32    -32    
128    16     
96     128    
80     112    
16     80     
112    -80    
-272   192    
80     -80    
-176   -176   
176    96     
32     64     
-64    64     
-16    208    
96     208    
-128   160    
-48    -160   
96     -80    
96     304    
80     0      
-48    -64    
160    -48    
-80    64     
112    160    
-48    64     
64     48     
0      160    
-224   -128   
256    96     
-80    128    
176    48     
-128   48     
80     256    
64     0      
128    -112   
64     -48    
192    112    
-144   160    
128    176    
96     112    
80     128    
144    144    
-16    0      
96     -32    
16     -32    
32     -192   
256    208    
-112   96     
-16    48     
-112   16     
-80    -16    
160    256    
128    128    
-224   32     
112    80     
-48    -368   
96     -144   
480    480    
304    192    
-336   128    
64     16     
32     -96    
-80    0      
-32    -48    
0      16     
144    112    
48     96     
176    0      
-176   128    
64     48     
-160   -400   
144    -32    
-208   -64    
192    64     
80     224    
0      176    
32     192    
-48    80     
112    64     
80     80     
-16    32     
0      64     
-144   -80    
160    112    
-48    80     
-48    -208   
272    176    
64     -1920  
96     48     
-96    96     
112    48     
32     -48    
48     -32    
96     -32    
16     208    
144    96     
-128   32     
192    96     
-80    -16    
192    192    
160    128    
-32    96     
128    -384   
-288   -224   
208    -768   
128    128    
-128   -432   
96     80     
16     80     
64     -64    
-128   16     
288    112    
-96    -48    
-16    -96    
224    48     
224    32     
-288   112    
112    -320   
96     96     
64     -400   
144    48     
64     -144   
-48    -96    
32     -16    
0      -16    
224    -48    
240    224    
-144   64     
32     -112   
176    112    
32     -16    
176    160    
112    -160   
-48    -16    
256    -752   
-192   -64    
144    -784   
112    192    
-128   96     
80     96     
64     32     
224    112    
-112   -32    
48     -144   
144    112    
96     -448   
144    272    
0      48     
48     96     
128    -496   
-32    80     
64     -64    
48     80     
48     48     
112    144    
-64    0      
16     320    
-48    64     
48     -96    
16     64     
0      -192   
144    96     
-32    -144   
-64    -32    
64     -256   
128    16     
48     -816   
96     96     
-48    112    
16     80     
-112   -64    
96     -208   
-96    -64    
192    -208   
-48    112    
176    -160   
-160   48     
176    32     
320    304    
-48    576    
-176   96     
208    -240   
-48    -2128  
304    -288   
96     -1280  
144    -1824  
-112   80     
96     -720   
-48    -48    
48     -2160  
64     -240   
-128   -256   
240    64     
-224   112    
400    -320   
-192   -272   
352    -320   
32     -272   
80     256    
160    80     
0      16     
240    -32    
176    0      
16     -96    
-112   -880   
96     -96    
-112   -1488  
96     304    
240    512    
-352   -704   
448    -144   
-192   400    
48     -16    
-192   -224   
64     -176   
256    -144   
-384   240    
80     -288   
160    0      
112    -128   
0      0      
48     -448   
208    -176   
288    112    
80     -96    
-16    144    
64     160    
-128   -176   
64     160    
48     48     
-64    256    
-16    -304   
-256   -320   
448    384    
-48    224    
80     -64    
-80    -576   
80     32     
96     -144   
-16    144    
144    -64    
-176   96     
32     16     
96     -32    
-128   -32    
-256   -192   
80     -144   
288    -48    
-464   -176   
-32    -256   
-304   -784   
-80    -528   
224    80     
48     240    
-32    176    
-224   -448   
208    80     
0      -112   
-32    -192   
128    224    
160    48     
16     -144   
256    288    
-128   -144   
-96    -896   
192    592    
-272   736    
208    -544   
96     -336   
176    208    
-272   -1008  
112    -336   
-16    144    
128    288    
-320   -256   
176    -384   
192    288    
32     576    
-224   -144   
-160   -64    
-144   -32    
208    -96    
-48    80     
-64    -480   
448    176    
-144   -832   
128    176    
48     -64    
16     -96    
-112   -272   
320    496    
-224   240    
-96    -16    
-352   -512   
64     -560   
16     528    
-192   -112   
-48    -288   
272    -80    
-176   224    
0      -368   
192    -336   
-192   480    
256    -208   
-400   -1008  
368    608    
-96    160    
48     144    
-16    -32    
-112   -400   
112    64     
192    544    
-320   256    
160    -896   
-304   -912   
208    -304   
112    496    
80     592    
-64    576    
432    -48    
-240   0      
-48    0      
0      -80    
0      -16    
-80    80     
32     64     
-16    -80    
32     80     
0      -256   
16     80     
-240   64     
-816   -272   
-288   -320   
-512   192    
-240   224    
-96    -192   
-176   -112   
144    -96    
-144   96     
160    32     
0      352    
-144   -240   
-16    -32    
-320   -288   
80     -272   
80     112    
144    112    
-144   16     
-368   -128   
16     16     
96     208    
-208   -304   
0      -64    
-16    0      
-320   -96    
-176   -480   
-192   -16    
112    80     
-32    160    
64     400    
-16    192    
-160   -320   
96     -112   
-384   -80    
-112   -304   
-608   -160   
32     -16    
-1200  80     
32     -32    
0      -160   
144    48     
160    48     
-176   112    
144    -416   
-240   -80    
96     48     
-192   96     
0      0      
32     64     
0      96     
-176   112    
-80    64     
-576   0      
-64    144    
0      -96    
160    112    
0      -80    
80     -16    
-64    -80    
112    48     
80     64     
-64    48     
128    160    
-240   80     
-96    112    
112    -176   
-96    96     
-64    0      
-112   112    
-272   -16    
0      -80    
64     -112   
144    176    
32     -160   
336    -48    
-304   128    
304    112    
-208   144    
48     144    
-64    176    
-224   224    
64     320    
-192   -64    
112    192    
-432   32     
96     176    
-112   -48    
-32    -32    
48     48     
48     -48    
80     32     
0      160    
64     64     
-128   -64    
32     464    
208    448    
-64    240    
128    320    
144    96     
-496   -368   
32     -256   
16     -144   
128    496    
-112   144    
-32    -256   
128    64     
32     128    
0      256    
-112   -64    
128    144    
-176   64     
-256   96     
-256   -16    
-80    0      
-336   -32    
128    96     
96     96     
-80    16     
32     80     
-240   -80    
304    192    
-352   -112   
-80    48     
240    -224   
-64    -128   
-32    -272   
-96    -80    
96     -32    
48     192    
-64    16     
16     176    
32     144    
-96    -32    
64     80     
96     64     
-32    -96    
-112   48     
112    48     
-144   0      
304    128    
-528   48     
160    0      
-128   -48    
368    224    
-560   32     
192    32     
-112   96     
128    128    
-112   80     
-16    48     
176    80     
-16    176    
32     192    
-304   -32    
176    144    
-48    64     
128    96     
-64    16     
112    240    
48     272    
-288   208    
176    192    
-112   -112   
0      32     
160    144    
-48    32     
128    32     
0      96     
64     48     
240    288    
-208   96     
240    176    
-240   -112   
288    48     
32     48     
0      16     
64     96     
144    80     
0      16     
-32    -48    
16     -32    
80     16     
16     80     
80     208    
48     224    
-208   0      
32     80     
-128   32     
112    64     
96     0      
80     -16    
-64    -32    
48     -304   
0      -16    
256    80     
-32    80     
128    112    
-112   16     
64     176    
176    -32    
-192   -96    
288    160    
-96    128    
0      -208   
112    -48    
96     64     
-48    32     
32     160    
96     128    
-80    224    
192    240    
80     240    
16     96     
-64    -32    
128    48     
0      48     
288    592    
-64    192    
-160   -768   
-48    -176   
16     -96    
-80    -112   
80     -112   
32     -80    
-16    32     
0      32     
16     -48    
32     0      
32     160    
80     288    
-80    192    
-32    240    
112    384    
224    336    
-80    80     
-96    -352   
128    -80    
-96    160    
96     64     
-16    80     
16     0      
64     -144   
192    144    
-80    96     
112    528    
80     -288   
-1712  -32    
208    464    
-256   16     
96     96     
-160   -1136  
432    16     
-144   144    
176    96     
48     240    
80     80     
-112   -96    
80     96     
-96    -224   
-64    -32    
64     -96    
-80    -304   
32     16     
160    176    
64     -64    
-48    -1152  
-16    112    
80     -320   
208    304    
112    416    
128    544    
32     160    
16     352    
-96    -272   
96     -240   
-48    208    
-32    -192   
96     112    
640    -16    
-560   -352   
144    -624   
352    512    
-48    -1552  
48     96     
32     -16    
32     0      
112    -96    
-48    -128   
320    -128   
160    320    
144    96     
-80    224    
240    -320   
112    -160   
-32    448    
48     -272   
96     80     
0      -320   
192    -48    
-32    80     
32     48     
256    464    
-144   416    
-96    -64    
240    -80    
-128   112    
144    -80    
-80    0      
224    -240   
-128   96     
224    -32    
-96    64     
304    -240   
-240   -528   
-48    416    
0      0      
96     -32    
160    400    
-144   224    
192    -144   
112    -160   
32     -144   
0      560    
96     -336   
128    -176   
-128   16     
288    -576   
96     192    
-160   -240   
160    -32    
48     -112   
-80    656    
-32    0      
-288   -80    
304    -96    
-144   176    
-176   48     
192    -288   
-112   320    
224    -400   
-240   -80    
160    -112   
-160   496    
64     -1120  
160    48     
-144   -192   
32     -656   
-32    -976   
416    -784   
-96    272    
96     -752   
-208   -384   
448    -2064  
-96    -80    
32     80     
112    -32    
-80    -48    
128    0      
80     -1440  
64     -96    
96     -384   
32     -144   
-288   160    
320    480    
-96    80     
224    -96    
128    32     
16     -96    
224    -272   
-176   -576   
128    -128   
224    240    
-128   -144   
288    -512   
-96    64     
192    -32    
64     -16    
-64    112    
112    48     
16     624    
-112   -336   
176    -240   
-32    96     
160    -32    
32     -160   
96     128    
176    64     
-160   272    
256    48     
-144   32     
304    0      
-48    64     
-208   -96    
48     -160   
64     -16    
128    -16    
-112   -288   
128    -352   
0      -32    
112    -720   
-144   -48    
288    -384   
80     256    
176    48     
-48    32     
80     -64    
-80    -128   
-128   -160   
160    0      
-128   96     
96     48     
-768   -464   
240    -240   
288    64     
-48    -112   
16     -48    
224    -48    
80     176    
80     -144   
48     144    
-16    16     
-96    -48    
32     16     
144    -48    
-208   48     
16     -272   
-432   -64    
192    64     
-480   64     
128    -32    
64     32     
80     -688   
0      288    
176    16     
-64    64     
80     32     
-112   -80    
64     -32    
-144   -368   
224    -64    
-160   -112   
288    240    
-336   0      
-80    96     
-160   -272   
64     80     
0      -752   
-16    128    
32     -240   
32     -144   
-208   -128   
32     -48    
-128   32     
112    0      
-96    48     
80     128    
-224   48     
16     0      
64     -112   
80     -128   
-16    16     
144    -256   
256    16     
-64    -176   
144    176    
-416   0      
-16    -128   
-112   -64    
0      32     
64     80     
-48    -256   
0      48     
112    48     
-208   96     
160    16     
128    96     
80     -144   
208    288    
-256   -336   
-144   -192   
-16    208    
-48    96     
64     160    
-32    224    
-48    112    
0      -240   
-64    -96    
224    -16    
-224   128    
16     192    
-112   32     
224    -192   
-32    -64    
-272   -224   
-176   -176   
-192   -48    
-192   64     
-192   0      
-144   128    
-64    176    
144    80     
-304   16     
144    432    
32     496    
-304   112    
96     112    
-496   -304   
528    176    
64     608    
-32    560    
192    240    
-496   112    
720    288    
0      16     
368    0      
336    96     
-96    80     
96     -32    
272    192    
-208   -256   
160    160    
-48    80     
-160   80     
-112   96     
-192   -160   
32     -96    
-368   -48    
224    336    
-64    128    
-144   48     
-1120  -32    
-272   32     
-176   -112   
16     192    
112    -112   
-80    48     
-80    -64    
288    48     
-128   80     
-80    96     
32     192    
-144   -32    
64     128    
64     96     
-48    -16    
-448   -160   
160    80     
-64    -16    
144    144    
-80    -48    
144    96     
176    144    
0      16     
-64    48     
96     -16    
-48    -80    
0      -80    
64     80     
-16    -32    
-80    64     
-96    -96    
112    112    
-512   -16    
0      208    
-96    -80    
-112   16     
-112   -112   
160    32     
16     112    
-80    -80    
-144   -176   
208    144    
16     64     
-304   0      
-32    64     
-96    -16    
16     176    
-1200  32     
160    288    
-128   -192   
48     -48    
0      64     
112    -128   
-176   -352   
160    -432   
-208   112    
288    128    
-32    144    
-160   96     
144    144    
-32    -16    
112    80     
-256   -48    
112    80     
32     80     
-32    -128   
-96    -112   
160    160    
144    -64    
-112   -496   
-96    -256   
80     528    
48     -256   
-96    -64    
112    -64    
-176   32     
-64    -96    
-144   -80    
48     304    
32     -144   
16     288    
208    352    
-256   80     
240    16     
-48    -16    
64     144    
16     144    
32     16     
-208   -80    
96     -752   
-112   608    
32     -112   
-192   -48    
112    192    
144    -96    
-144   48     
176    0      
-16    336    
64     64     
-240   -784   
-16    -960   
256    144    
80     960    
-96    192    
-48    -320   
64     144    
80     128    
-96    -48    
-48    80     
208    272    
-48    336    
32     48     
-64    32     
128    32     
-96    32     
64     80     
-64    16     
-160   -96    
16     -352   
224    128    
-32    48     
112    -16    
-16    64     
144    32     
80     48     
-416   -368   
-64    -512   
48     -48    
-432   -256   
704    0      
64     1056   
672    848    
-112   208    
64     240    
-112   -16    
-32    -272   
-64    -112   
-16    -64    
-160   -112   
-176   -288   
96     16     
-160   272    
240    176    
-96    272    
64     48     
-96    16     
320    -48    
-192   176    
304    -32    
-448   -384   
-80    -624   
224    272    
-64    512    
144    144    
0      -64    
48     192    
320    352    
-96    192    
272    -192   
-16    -384   
160    32     
16     224    
32     288    
-32    -112   
48     336    
-64    336    
144    -704   
-64    -160   
32     -208   
-176   96     
320    464    
-80    352    
64     -48    
176    304    
-32    -64    
176    160    
-208   272    
144    224    
144    -192   
768    800    
-784   -848   
224    -1616  
-16    64     
16     288    
-256   48     
320    96     
-160   496    
48     -352   
304    144    
-272   -240   
128    96     
-272   176    
112    80     
-160   -64    
96     128    
-224   -48    
96     -240   
-128   432    
-224   -768   
80     400    
0      144    
0      272    
-144   -48    
48     -32    
-48    176    
-128   -160   
80     384    
-64    240    
80     -160   
-192   -336   
-32    -160   
176    -432   
-80    64     
128    -1152  
0      -128   
240    -32    
192    176    
48     160    
208    256    
-96    256    
160    288    
-64    208    
240    320    
-224   96     
128    224    
336    -48    
-320   -272   
64     -80    
96     -1504  
144    160    
144    64     
96     592    
-32    176    
176    96     
-96    -160   
160    -80    
-48    -160   
224    208    
-64    272    
80     -256   
-208   64     
224    -128   
16     160    
64     -112   
-48    128    
240    -320   
112    176    
-80    256    
464    640    
-352   144    
256    320    
-176   144    
80     208    
128    304    
16     16     
16     80     
-16    -64    
48     176    
240    -304   
-160   32     
112    -512   
-48    96     
128    208    
-112   -96    
32     -128   
224    80     
0      48     
112    112    
-32    16     
-48    -400   
336    96     
-112   -176   
-16    16     
128    -32    
16     32     
-128   -640   
144    -176   
176    112    
16     -48    
192    96     
176    176    
-160   -144   
128    -368   
112    192    
-16    -48    
80     96     
48     -96    
128    176    
-64    -304   
96     112    
16     -160   
-16    144    
48     -48    
48     64     
32     0      
64     -240   
80     -128   
48     -160   
-32    80     
80     112    
96     144    
-96    -192   
80     80     
-64    -320   
80     48     
-128   -240   
320    0      
32     160    
16     -1680  
0      -48    
16     -160   
-16    -208   
80     112    
-80    -384   
96     -176   
64     -448   
272    672    
-64    0      
-160   -512   
32     -208   
112    0      
0      -448   
144    0      
-48    -432   
64     16     
-272   -80    
112    -96    
16     -16    
256    -848   
-80    48     
96     32     
32     176    
-32    -128   
64     48     
128    224    
32     -32    
-16    96     
96     272    
-272   -64    
80     128    
-32    -64    
48     -112   
-304   48     
80     -16    
144    48     
-112   -160   
128    128    
-208   -1312  
-256   -688   
496    144    
-160   80     
128    -240   
16     64     
208    0      
80     -80    
-256   -32    
208    64     
-400   -80    
0      -192   
16     -480   
80     96     
224    64     
-96    -400   
128    -176   
128    -864   
16     32     
32     0      
0      -96    
48     -96    
-112   -96    
144    -32    
16     32     
48     16     
32     0      
-672   -224   
96     -320   
192    96     
-352   -528   
576    -80    
-320   -80    
432    16     
16     80     
192    48     
-304   -128   
272    80     
-176   -64    
352    -80    
-464   -96    
160    -240   
-1104  -64    
-48    -64    
288    80     
-208   -80    
96     48     
32     -240   
144    112    
-112   -112   
144    -32    
-48    208    
112    -80    
-144   0      
16     16     
-144   -16    
0      -16    
16     240    
32     -32    
-416   16     
0      -192   
112    16     
-16    -528   
160    144    
-128   -592   
176    176    
-64    144    
80     128    
-208   32     
176    -32    
-32    -32    
176    16     
-64    -32    
-96    -32    
-320   112    
64     -128   
-144   112    
208    -160   
-224   -80    
80     -544   
-48    -224   
-688   -16    
128    -208   
-224   32     
32     32     
-48    -32    
16     -112   
-16    -64    
-48    -112   
-16    368    
272    -368   
-48    128    
-48    -752   
-32    -192   
-32    320    
-80    -32    
-144   -16    
432    544    
-400   -416   
48     -256   
-128   -32    
96     112    
-304   240    
128    -720   
-80    688    
-160   80     
80     -16    
-384   -128   
-144   -48    
240    112    
-320   48     
-16    32     
-320   32     
-64    48     
-128   0      
-80    0      
176    -144   
-128   -176   
-64    144    
-32    -64    
-64    -336   
32     592    
-192   -384   
-176   96     
-80    224    
-96    -112   
-48    -336   
16     -112   
-112   -48    
-416   0      
-80    -240   
-64    -32    
80     -128   
-240   0      
144    -32    
-272   -128   
32     0      
176    -80    
0      64     
224    -32    
-128   80     
128    64     
-176   16     
-48    64     
80     0      
-256   -192   
-640   -416   
16     128    
-96    128    
-96    -304   
-96    -608   
160    0      
32     -144   
-32    -288   
208    64     
-96    176    
16     96     
16     48     
0      64     
-64    16     
-112   96     
-272   -80    
-112   80     
288    -32    
-112   128    
48     -176   
0      80     
80     80     
-64    -48    
112    208    
-48    640    
176    192    
128    48     
-64    240    
-160   176    
32     144    
-384   240    
-192   0      
48     -112   
176    816    
496    864    
-288   352    
0      16     
-272   -32    
240    -240   
-336   -304   
304    -224   
-128   -272   
-96    -336   
544    -272   
80     752    
112    480    
-112   -144   
-304   -416   
-16    224    
64     16     
-128   -352   
464    624    
-112   464    
-288   -256   
-96    -1136  
416    160    
-16    192    
48     -64    
192    16     
128    208    
-160   160    
-96    -48    
-496   -96    
224    592    
-480   16     
-128   -912   
-16    128    
-64    192    
-32    -240   
176    368    
-224   -96    
-304   -352   
-32    -192   
288    256    
48     304    
272    800    
-496   -624   
-192   -608   
80     304    
160    112    
80     -272   
-192   -336   
176    -112   
-64    -160   
224    720    
240    432    
32     288    
112    352    
240    160    
-256   0      
48     144    
-32    224    
-368   80     
-144   -288   
-192   96     
176    -32    
-176   32     
-16    48     
-96    -112   
64     -80    
112    64     
112    32     
0      64     
48     80     
48     112    
-112   288    
160    352    
-112   112    
192    32     
-80    128    
-64    -64    
-96    -16    
256    128    
-48    128    
-32    192    
48     64     
-160   -16    
64     32     
-16    -96    
16     -16    
-32    16     
336    192    
-96    208    
32     432    
240    48     
-16    -32    
160    128    
112    48     
144    144    
-144   0      
16     128    
-112   96     
48     128    
48     0      
16     128    
-64    64     
16     -32    
-48    -96    
80     -16    
80     240    
-96    96     
64     112    
16     0      
16     16     
176    128    
112    80     
-160   0      
96     128    
-144   -32    
80     128    
16     256    
-160   32     
48     112    
192    352    
-208   16     
32     -64    
48     112    
0      112    
96     112    
-64    80     
-32    64     
-64    128    
176    48     
-176   -64    
64     112    
-96    80     
0      -1536  
48     160    
16     16     
32     80     
16     32     
80     64     
64     96     
160    176    
-224   -64    
64     128    
64     32     
32     32     
48     -96    
96     -64    
-48    -96    
96     -1808  
80     64     
-48    48     
96     32     
128    80     
16     96     
48     80     
64     144    
128    272    
48     112    
-112   -80    
176    64     
-16    -32    
32     -320   
-112   0      
128    -672   
48     144    
-32    112    
64     32     
80     64     
16     0      
-192   -160   
256    -192   
-112   -32    
288    80     
-48    0      
224    96     
-144   48     
160    -160   
48     -64    
80     -304   
-80    80     
304    -1648  
-96    -32    
128    16     
96     80     
144    96     
96     224    
80     176    
48     16     
-128   -144   
48     80     
64     -112   
16     -16    
128    64     
0      -64    
48     80     
128    -896   
96     128    
48     -480   
32     176    
112    -112   
-80    48     
208    -144   
-80    160    
96     64     
16     128    
176    64     
0      -48    
96     112    
-64    -304   
160    80     
16     -832   
32     160    
-32    -704   
48     112    
-48    0      
96     240    
-208   48     
112    64     
80     32     
-288   -352   
304    16     
16     176    
80     -64    
-32    -480   
160    128    
-16    -80    
64     160    
32     -512   
16     96     
-208   -208   
320    -144   
64     -64    
0      112    
-48    32     
176    48     
-48    -32    
32     -336   
96     112    
176    -160   
-32    144    
0      -80    
16     64     
64     -320   
-80    64     
0      0      
208    224    
-272   32     
352    64     
16     256    
16     -384   
192    64     
-112   -64    
224    80     
0      -80    
208    32     
-32    -224   
48     -64    
-240   16     
416    96     
-496   32     
400    112    
-192   -16    
432    -1424  
-256   -656   
144    -32    
-160   256    
-128   -176   
64     -144   
96     -272   
272    176    
-96    32     
144    224    
-64    -32    
32     -1040  
112    48     
-112   -1184  
64     0      
-272   0      
160    -224   
0      16     
16     -80    
208    -16    
48     -2080  
192    -32    
-64    112    
112    -128   
192    240    
64     112    
16     -448   
-64    -32    
304    80     
-144   304    
48     336    
-32    80     
96     -416   
256    -656   
96     208    
96     -544   
256    16     
16     -480   
128    320    
-80    -192   
80     -16    
112    -160   
-80    64     
240    64     
-128   96     
208    144    
-240   -304   
-624   208    
-32    -112   
176    16     
48     -64    
128    -112   
64     -528   
32     400    
64     -272   
-48    -96    
48     112    
-96    64     
224    -288   
-48    -112   
32     -112   
48     -112   
-240   48     
32     -48    
48     32     
48     -64    
96     -16    
112    -112   
-48    0      
64     -112   
16     80     
48     64     
304    240    
-336   176    
208    -80    
128    16     
-48    112    
-400   -32    
96     -96    
-592   -112   
64     -480   
-64    -96    
304    -192   
-96    144    
-16    -656   
64     48     
80     -208   
192    48     
-352   -160   
112    -80    
-160   32     
32     -64    
-208   -112   
96     -160   
-320   -96    
160    -48    
128    -192   
96     144    
-80    176    
112    -336   
-80    144    
0      -192   
112    -32    
-144   -16    
128    64     
-240   16     
368    -432   
-80    -176   
208    -48    
-592   32     
224    -272   
64     64     
-16    -176   
16     -48    
32     -240   
48     128    
0      -1424  
160    48     
-240   0      
96     -80    
-352   -48    
272    -48    
-272   0      
144    16     
-320   -464   
64     32     
32     -176   
96     208    
64     208    
16     -144   
16     224    
16     -112   
192    320    
-96    96     
-96    16     
272    1136   
64     -80    
-480   -1232  
416    368    
-304   448    
112    -432   
-336   48     
256    96     
0      -16    
-160   -352   
272    -176   
144    192    
-912   112    
-224   16     
160    -48    
-48    320    
16     16     
32     -592   
-224   -64    
-16    192    
-32    -288   
80     176    
-144   -192   
-80    -80    
-320   -272   
-192   -192   
-192   48     
-784   -32    
-16    -16    
-208   64     
32     224    
80     176    
-32    -368   
-48    -512   
80     0      
-368   -256   
224    -304   
-64    -304   
144    32     
-320   -288   
176    -64    
-224   16     
208    -176   
-272   32     
-16    0      
-416   -96    
-768   -80    
128    160    
-144   -80    
-160   352    
336    16     
-464   32     
576    -192   
-80    96     
112    64     
-320   -144   
352    -288   
-160   192    
16     -80    
-192   16     
320    80     
-1136  -80    
32     0      
-16    0      
112    48     
-80    -160   
32     64     
-16    -32    
144    80     
-64    -112   
-64    -96    
-16    -128   
-96    -16    
-128   96     
192    0      
-80    80     
-112   -64    
-240   32     
-736   0      
-176   32     
64     48     
-80    192    
240    -80    
-128   96     
32     -64    
16     0      
-112   -96    
256    -32    
-80    48     
112    80     
176    160    
-400   32     
80     32     
-512   -64    
160    160    
-224   0      
-16    -80    
80     -128   
160    288    
-176   64     
-64    -48    
112    176    
-48    16     
-80    16     
-112   -48    
-48    64     
-240   -32    
-144   0      
48     -16    
-176   112    
-304   -80    
-16    16     
16     96     
-80    -64    
-48    112    
-32    16     
-32    0      
-16    -144   
-144   -64    
128    144    
0      16     
-80    -32    
80     128    
-128   16     
144    240    
-480   -128   
-16    -32    
-192   64     
288    0      
16     144    
-144   -80    
-80    64     
64     16     
16     96     
32     16     
160    304    
16     128    
-64    96     
-128   -48    
352    192    
-480   -96    
-96    64     
272    32     
-112   80     
80     64     
-32    48     
48     160    
32     96     
48     48     
64     -16    
32     -64    
-80    -16    
48     64     
-112   -80    
16     80     
-192   48     
96     16     
-64    32     
-64    0      
16     128    
64     80     
-48    80     
16     16     
144    48     
-80    -32    
-32    32     
-96    0      
48     160    
-112   48     
-48    -176   
128    32     
-144   192    
96     112    
-48    -32    
192    -16    
16     0      
80     80     
112    80     
-112   80     
-80    48     
320    160    
-144   64     
80     80     
-112   32     
16     -224   
-224   128    
320    64     
-48    -16    
224    -48    
16     304    
96     128    
-48    48     
32     48     
16     64     
32     208    
-64    176    
64     192    
-48    176    
-256   -192   
192    -16    
16     16     
-64    64     
144    112    
-96    96     
-64    80     
-112   -128   
-96    0      
-32    0      
-96    160    
-80    -32    
-16    112    
-96    32     
-32    64     
-160   -208   
16     64     
208    224    
-256   96     
64     80     
-16    144    
-160   16     
272    112    
-48    96     
144    112    
-16    16     
80     96     
-112   32     
144    96     
32     144    
32     64     
-336   -160   
384    -480   
0      -240   
176    -48    
-224   -144   
384    288    
-224   432    
112    304    
-160   -192   
0      32     
112    -112   
-16    64     
160    64     
-64    160    
128    48     
-80    -2512  
96     -32    
272    224    
-64    352    
-96    240    
-240   0      
544    48     
80     96     
96     224    
-48    80     
-16    0      
208    32     
16     -144   
48     -320   
96     48     
0      -672   
-240   32     
128    16     
176    304    
-128   128    
-32    96     
240    224    
-304   112    
0      -64    
112    -576   
96     -240   
224    112    
176    224    
128    192    
48     64     
112    -80    
16     -48    
0      -752   
0      208    
128    -32    
16     32     
80     48     
64     -112   
48     -32    
112    224    
-256   -448   
32     320    
64     96     
32     -128   
-96    96     
112    -64    
48     96     
16     -768   
48     80     
-80    -496   
288    -64    
-160   128    
-80    -272   
208    -208   
240    912    
-128   688    
-384   -544   
112    -512   
-16    -128   
240    160    
32     -80    
48     96     
112    -544   
-16    192    
256    -592   
16     -96    
-64    -320   
128    144    
-16    16     
80     96     
16     0      
-16    -128   
144    -192   
320    192    
-48    640    
80     128    
0      32     
112    16     
176    64     
-32    -64    
96     80     
-48    -16    
80     96     
112    0      
96     112    
-32    16     
80     48     
64     48     
64     -224   
16     96     
96     -160   
0      -208   
-112   -496   
64     -320   
176    -592   
32     64     
96     96     
96     128    
32     32     
80     80     
80     160    
0      -368   
80     48     
256    -16    
-32    64     
160    -96    
96     48     
80     -96    
224    176    
16     -16    
96     128    
160    -16    
0      336    
32     48     
-96    -112   
-192   -2304  
0      -512   
96     240    
96     64     
16     48     
80     80     
48     448    
80     176    
-288   48     
416    112    
-64    -704   
80     -48    
-352   -864   
-64    -384   
-848   -128   
-64    32     
176    16     
-96    -336   
32     -160   
112    -2112  
80     48     
-64    -704   
240    -240   
192    112    
-128   64     
176    -560   
-304   32     
64     -1056  
-176   -448   
336    944    
-320   -272   
208    -256   
48     -16    
32     -128   
-112   -80    
208    -192   
48     48     
144    96     
400    208    
-288   -512   
192    -272   
176    608    
64     128    
96     -64    
-160   -416   
-112   -480   
-576   -32    
-64    32     
144    64     
-96    -112   
288    336    
-144   -16    
-112   -16    
160    -80    
-304   -32    
128    -32    
128    192    
144    192    
-16    32     
16     176    
-240   -112   
-176   -144   
48     16     
112    0      
-80    144    
192    48     
-64    -1120  
-96    -208   
-48    -1344  
-352   -448   
-144   -640   
320    64     
-80    208    
32     -16    
-352   -32    
432    64     
-208   240    
128    80     
-1840  -272   
240    -32    
-96    160    
-96    -80    
144    32     
32     -64    
16     128    
-64    -96    
288    -144   
-160   16     
32     -128   
32     -96    
-144   -96    
-32    112    
-48    -48    
-400   -112   
160    -16    
-560   144    
-96    -624   
112    176    
-16    -560   
-16    0      
144    240    
48     -16    
-112   96     
16     0      
48     -32    
96     -288   
-496   -64    
-64    -160   
-224   96     
-48    32     
-48    -64    
-80    -192   
176    96     
-64    -288   
160    144    
-304   -32    
64     -160   
-16    -32    
144    32     
-80    -48    
-112   16     
16     -16    
-96    -32    
32     160    
160    48     
-80    128    
240    -80    
112    192    
-240   -160   
144    112    
32     48     
64     0      
-224   16     
96     -64    
-80    -48    
-128   -16    
48     48     
64     -160   
-96    0      
144    -128   
176    288    
-112   -80    
-32    96     
-400   -112   
-608   -48    
-160   -48    
112    -32    
-192   0      
448    400    
-480   80     
224    32     
-224   -16    
208    0      
-272   -80    
-240   -80    
144    176    
0      -80    
-144   -32    
-272   -336   
-96    288    
-80    96     
-320   48     
-48    -96    
-32    -112   
-96    -64    
16     32     
-64    80     
-16    16     
256    400    
-672   -48    
32     16     
16     16     
-80    112    
-192   32     
64     48     
64     64     
64     0      
192    272    
-272   80     
-96    -16    
-96    -80    
32     128    
96     16     
-272   -16    
144    16     
-80    128    
32     -160   
80     64     
-16    64     
-96    -16    
48     16     
64     16     
-112   0      
-304   -48    
-48    0      
-144   -144   
128    64     
320    -144   
0      -16    
-64    -128   
48     80     
-32    -112   
0      80     
-16    80     
160    160    
-176   -32    
-16    -16    
-96    32     
48     112    
-128   128    
96     144    
-144   -32    
-368   -144   
-16    0      
128    -80    
-48    16     
-32    16     
-64    64     
-32    112    
-80    -32    
0      32     
-64    16     
64     64     
192    208    
-224   160    
-160   -48    
-96    -32    
-304   -64    
112    272    
-160   -64    
224    128    
-64    32     
-96    -48    
32     -64    
-176   -112   
432    -64    
48     16     
-304   176    
-128   -16    
-320   -336   
-48    -304   
-160   -48    
-128   96     
48     112    
-272   -272   
-32    -48    
224    176    
-256   -192   
400    176    
-16    208    
96     48     
-160   16     
144    16     
-48    -16    
-240   160    
160    96     
32     144    
-80    0      
400    672    
-240   576    
-176   288    
48     128    
-16    160    
32     80     
-96    0      
16     -32    
32     -48    
-208   -16    
240    48     
-352   -320   
32     -336   
-144   80     
-336   -432   
96     -16    
-496   272    
224    576    
-176   48     
0      80     
0      -16    
-48    0      
16     80     
-112   -144   
112    16     
-112   -224   
64     48     
-464   -432   
80     48     
-176   0      
32     384    
144    272    
-64    -128   
16     112    
160    208    
-304   -32    
48     -16    
128    -64    
-144   288    
176    -112   
-32    432    
64     176    
-240   -224   
336    -80    
-16    224    
496    304    
-240   -96    
-96    48     
112    -256   
16     384    
32     -112   
-48    272    
-48    80     
-96    -240   
64     352    
-352   384    
96     -480   
-32    -224   
144    528    
-144   752    
-32    160    
-208   -400   
-112   112    
80     -192   
64     32     
-128   128    
48     16     
-80    64     
-144   0      
208    80     
-96    0      
32     96     
-32    32     
0      -32    
-112   32     
112    144    
-32    -432   
-64    224    
-208   -256   
96     -288   
96     480    
416    192    
-272   480    
128    -128   
-112   192    
48     160    
-160   64     
16     80     
-112   -224   
-64    16     
160    144    
-32    48     
80     64     
-32    112    
144    144    
64     192    
80     176    
-64    -80    
160    272    
48     320    
-32    128    
80     128    
-272   -432   
448    64     
-304   64     
464    128    
-64    64     
-48    48     
80     48     
0      96     
32     48     
32     80     
48     96     
-16    64     
-96    -48    
384    176    
-304   -32    
304    112    
-336   48     
192    -416   
-128   -1760  
-112   -80    
64     -240   
-48    112    
112    192    
48     -16    
32     -16    
48     16     
-16    0      
64     176    
-64    -384   
80     736    
64     192    
-224   -688   
384    192    
-64    -576   
16     288    
144    64     
-48    224    
64     144    
80     -80    
48     320    
-48    -64    
-144   -656   
320    224    
-256   -224   
128    112    
224    544    
-208   -512   
-16    -336   
352    -224   
-112   256    
128    -368   
48     96     
-16    160    
0      0      
112    -320   
160    32     
16     16     
-96    464    
-80    -736   
96     -336   
-32    -304   
112    -96    
32     336    
208    224    
-32    96     
128    -1584  
-144   288    
144    256    
192    112    
64     64     
80     96     
-272   -176   
144    80     
16     48     
16     160    
160    400    
-176   32     
-16    96     
32     -256   
16     -32    
16     -208   
64     96     
48     -112   
112    208    
-80    96     
272    320    
-304   -112   
176    144    
-192   80     
-96    -128   
48     -32    
80     -112   
-112   -224   
48     -1136  
128    112    
16     -16    
-176   -112   
416    -512   
-288   256    
304    -64    
-96    96     
80     32     
112    96     
-80    96     
208    -416   
-192   176    
80     -688   
432    -96    
-16    -32    
240    48     
-256   64     
240    32     
-128   -464   
160    -80    
0      176    
32     32     
0      48     
96     192    
112    144    
0      288    
-32    256    
128    -32    
48     80     
48     -96    
-256   64     
160    -256   
32     -48    
-64    -288   
64     80     
16     96     
304    -512   
-32    -64    
160    -256   
96     -144   
-32    48     
-16    -192   
-32    96     
16     144    
-160   -320   
0      128    
-112   -240   
96     -32    
-128   -448   
64     -128   
208    272    
-64    -128   
64     -336   
-560   176    
-208   -112   
96     32     
48     -224   
96     48     
-48    -112   
128    48     
-48    64     
-144   -112   
320    -352   
16     96     
112    -288   
80     -16    
64     -304   
128    -96    
0      64     
-16    112    
112    -48    
16     -32    
64     -80    
-64    -704   
16     64     
192    -416   
-64    48     
96     -1152  
-32    -96    
-48    -320   
32     32     
32     -16    
160    -16    
0      112    
272    -32    
-1568  -112   
32     -176   
96     0      
96     -464   
160    32     
-64    -1728  
-80    -336   
192    -160   
-32    48     
48     -64    
-32    80     
-48    -32    
96     16     
-240   -16    
0      -48    
-944   -80    
16     48     
144    128    
-80    -128   
32     32     
64     -448   
-64    64     
160    32     
-128   112    
176    96     
32     96     
-48    -400   
48     -240   
-112   48     
-64    -48    
-128   64     
304    128    
-944   112    
96     -96    
-208   -112   
192    -464   
-16    48     
176    -864   
-16    48     
112    32     
32     64     
-256   0      
176    144    
-176   32     
80     48     
-352   -32    
48     -144   
-1312  0      
112    -96    
-48    -16    
96     -160   
48     96     
128    -368   
-32    80     
16     80     
64     80     
0      48     
64     16     
-176   -32    
176    96     
-288   -16    
-64    0      
32     64     
96     -80    
32     -48    
80     -176   
0      32     
-16    -256   
240    -112   
-80    -32    
0      0      
-96    -176   
-32    -240   
144    -80    
-144   -16    
96     144    
-64    272    
32     160    
96     192    
80     48     
32     -256   
208    176    
-96    96     
32     128    
-192   -64    
352    0      
-208   48     
48     256    
80     -48    
-64    -304   
32     64     
80     80     
-240   -80    
256    -16    
-224   -384   
416    64     
-144   288    
-1072  -816   
304    848    
32     -208   
192    -128   
-176   -256   
64     384    
112    336    
-32    80     
112    112    
64     464    
-496   -224   
-512   -240   
80     128    
-144   0      
-128   -112   
384    -176   
-464   0      
-160   96     
-48    -176   
128    560    
-112   176    
16     -16    
-16    -16    
-160   -144   
80     -224   
-16    96     
272    80     
-160   96     
64     176    
256    400    
-224   -80    
128    -64    
32     64     
48     -112   
160    -80    
-144   192    
64     80     
-1024  -208   
-80    -672   
208    208    
144    672    
-192   -208   
96     48     
-48    -96    
-368   -144   
0      192    
-32    32     
-112   272    
144    32     
16     1152   
-256   -176   
-16    -480   
-128   128    
-144   304    
-288   16     
-64    -128   
-96    0      
128    -16    
-416   -672   
320    192    
64     384    
16     -272   
-208   0      
-160   -32    
-32    80     
-256   112    
336    -224   
-96    144    
416    -224   
-1312  224    
-112   -176   
224    -352   
128    992    
128    0      
64     80     
-304   416    
80     -480   
528    432    
-720   -160   
112    -400   
208    432    
-272   112    
-192   -592   
32     160    
-480   0      
16     48     
16     -32    
96     64     
48     96     
-128   32     
16     64     
-80    -32    
-16    32     
176    208    
-128   288    
-16    -368   
32     32     
-464   80     
240    304    
-176   -128   
-144   192    
-224   0      
-112   -144   
160    96     
-112   192    
96     0      
16     -96    
512    656    
-448   480    
-96    -160   
64     -224   
-96    368    
-48    -288   
112    -16    
-544   -320   
560    80     
-944   512    
256    512    
-144   -416   
-208   -16    
128    -224   
-144   160    
-128   -16    
64     112    
48     272    
-160   -32    
128    96     
-64    -16    
16     80     
-176   -80    
144    80     
-32    96     
0      64     
-32    48     
112    -16    
16     -176   
160    -128   
-112   -288   
80     -144   
288    496    
-128   -160   
288    96     
-160   32     
112    432    
0      64     
-48    -80    
160    144    
-144   160    
144    144    
240    512    
-320   -208   
16     -96    
16     -288   
-48    -240   
96     16     
0      256    
192    336    
-160   160    
0      160    
-16    32     
0      160    
64     64     
32     -16    
16     96     
-16    160    
112    -48    
32     144    
-32    -96    
144    -128   
-48    -160   
64     144    
64     48     
-48    -64    
176    144    
16     64     
224    192    
-272   16     
32     -64    
64     16     
160    224    
-96    80     
48     -32    
80     -112   
16     48     
224    176    
16     48     
160    0      
-80    -32    
432    272    
-256   224    
144    144    
16     144    
160    96     
32     48     
0      128    
-80    560    
128    32     
96     -48    
176    -144   
-48    176    
-80    -96    
48     48     
-96    -16    
16     -48    
112    80     
32     -128   
240    32     
-64    144    
144    0      
-64    64     
160    48     
16     -16    
-96    -112   
112    -32    
-64    16     
-288   -144   
32     16     
0      64     
-96    -336   
-16    -48    
224    160    
48     144    
-112   128    
-96    16     
240    192    
176    240    
64     160    
128    64     
-256   -272   
528    432    
-192   480    
192    176    
-16    128    
96     128    
-32    64     
-224   -96    
128    32     
176    16     
160    -112   
32     32     
32     240    
80     256    
16     80     
-32    96     
96     80     
0      -96    
-128   -144   
224    112    
-144   -144   
80     224    
-112   -1696  
-208   -32    
256    -64    
48     -16    
80     0      
16     256    
0      96     
-16    16     
112    336    
384    384    
-160   160    
-48    160    
48     352    
96     -272   
224    0      
80     -272   
208    48     
16     320    
448    320    
-336   160    
48     0      
-192   128    
336    80     
-128   -80    
64     128    
-48    32     
-112   -160   
160    128    
48     -16    
-32    32     
48     16     
144    64     
-176   -960   
208    144    
16     -656   
160    176    
-16    -32    
208    80     
16     16     
64     80     
-16    32     
-48    -144   
96     48     
80     -144   
-16    0      
192    -208   
48     32     
112    -608   
112    112    
-128   -736   
224    128    
48     0      
-96    80     
64     80     
32     80     
32     112    
64     16     
112    96     
-48    -128   
32     112    
112    -176   
96     160    
48     -80    
-16    128    
0      -96    
32     0      
-32    -112   
208    64     
-32    256    
208    144    
-48    16     
192    -96    
48     112    
96     -288   
192    240    
-144   -48    
128    128    
112    128    
-32    112    
160    -240   
-80    112    
144    -32    
48     208    
144    64     
-64    -160   
32     -192   
176    32     
112    112    
16     -80    
-64    128    
-160   -464   
160    16     
48     -352   
128    288    
-144   -912   
144    -48    
96     48     
-16    -960   
-80    -224   
128    -224   
64     -1184  
96     80     
-32    144    
-80    -416   
16     -192   
176    -176   
-96    208    
256    -96    
-16    -256   
0      0      
64     -560   
0      80     
32     -208   
16     -656   
-512   16     
64     -192   
96     192    
96     -144   
-96    -240   
144    -544   
-96    -208   
48     336    
-16    -128   
112    -32    
96     112    
240    0      
-224   368    
-144   -448   
240    64     
-32    0      
16     -48    
144    -64    
32     -32    
16     -96    
96     -288   
-80    -80    
128    112    
-160   -736   
160    368    
48     224    
-16    -432   
-96    0      
64     -48    
160    480    
-240   0      
-256   -528   
176    112    
208    256    
-192   -240   
80     -480   
192    16     
32     -256   
32     64     
240    -32    
-64    480    
528    16     
-592   -208   
16     -304   
80     -16    
-464   336    
64     -480   
-544   -128   
80     336    
288    176    
-128   0      
-256   -208   
-128   -576   
224    -512   
96     240    
192    480    
112    176    
48     -240   
-176   -32    
176    -256   
-432   -368   
208    80     
-240   112    
64     -96    
-1712  -224   
16     -272   
-48    -112   
128    -288   
176    128    
-192   -576   
64     112    
80     192    
-224   -224   
0      -880   
-48    -64    
64     496    
0      672    
-144   -160   
-112   -320   
128    112    
224    256    
32     32     
-432   -1056  
368    -256   
96     112    
-304   -48    
208    -592   
-192   -256   
160    208    
-176   -144   
288    368    
-400   -208   
-128   -912   
176    144    
-432   64     
96     -176   
16     144    
96     -64    
-80    352    
192    -448   
-112   -80    
64     -240   
64     352    
-48    144    
-80    -240   
-240   -208   
64     -48    
-240   -320   
-64    -48    
64     -80    
-64    -128   
240    368    
-48    -288   
0      48     
16     -112   
192    -80    
160    368    
32     128    
368    192    
-480   -368   
288    -16    
144    64     
-48    16     
272    160    
-208   384    
352    0      
-16    208    
-1376  352    
-48    -256   
-64    -160   
-288   160    
-32    192    
-880   -224   
0      304    
64     -80    
48     -112   
32     176    
-96    80     
192    336    
-96    -352   
-544   -384   
240    192    
-224   112    
272    208    
-272   96     
-288   -256   
-112   -144   
-192   -48    
-144   224    
-192   -224   
32     80     
-128   -80    
64     144    
176    112    
-32    -64    
16     -80    
112    224    
80     -144   
0      -48    
160    48     
-32    -64    
-64    0      
64     64     
-32    -16    
-272   -96    
-80    -64    
-720   -16    
-368   -96    
144    -48    
32     -64    
-96    -80    
96     -48    
0      -16    
0      80     
-224   176    
128    128    
-64    128    
-128   80     
-80    0      
-160   -48    
-48    -16    
-32    -32    
-112   112    
-160   -32    
16     160    
-32    -192   
-48    0      
144    32     
64     -64    
48     48     
-32    -112   
-80    -112   
80     -16    
-144   48     
48     80     
0      16     
-160   96     
16     64     
-576   -16    
-80    -16    
-32    16     
336    352    
-240   192    
16     176    
16     48     
0      64     
-16    160    
-64    48     
80     80     
-240   32     
320    176    
-336   -48    
16     0      
-240   -96    
96     64     
32     -16    
16     64     
48     80     
-16    16     
32     512    
-96    144    
-192   -208   
-32    -480   
-144   -64    
208    0      
-144   -176   
80     -64    
-96    128    
-304   240    
0      -96    
-640   -32    
-336   48     
208    16     
-112   -144   
208    -64    
96     128    
384    336    
-240   272    
32     288    
-176   -224   
112    0      
-176   -96    
-16    16     
-192   0      
-48    -16    
-1200  192    
-144   -64    
32     176    
160    48     
-64    112    
128    -128   
32     -224   
-144   -96    
-96    64     
48     80     
0      160    
-32    96     
64     240    
-128   16     
16     208    
32     144    
176    240    
-352   -16    
80     32     
240    32     
-144   -176   
112    32     
16     80     
16     64     
-16    -16    
32     32     
-96    16     
64     192    
-144   -48    
-128   16     
16     112    
-32    32     
16     96     
-144   -80    
208    32     
-240   -32    
48     -32    
64     112    
144    64     
-192   -64    
464    272    
-592   32     
352    144    
-592   -80    
304    64     
-208   64     
-48    112    
208    48     
-176   64     
80     48     
-48    48     
-96    -48    
336    96     
32     144    
64     16     
48     64     
-208   -32    
112    -16    
32     128    
96     64     
16     64     
-160   -96    
304    -64    
64     160    
128    112    
-96    0      
176    208    
-48    16     
16     128    
32     64     
-32    96     
64     144    
-96    112    
112    80     
-80    80     
112    128    
-48    96     
48     64     
48     96     
0      112    
-112   -128   
80     -80    
16     -80    
224    80     
0      160    
-64    192    
-160   -128   
-80    -2496  
176    160    
96     96     
-112   32     
0      96     
128    -80    
80     -96    
64     -32    
-48    192    
48     64     
32     208    
-80    -64    
-80    -560   
48     96     
0      80     
16     32     
-16    16     
-48    -160   
16     32     
208    -64    
-192   -144   
80     112    
32     80     
48     16     
160    96     
-32    32     
160    112    
-64    -144   
80     128    
128    64     
64     -112   
80     64     
-16    -48    
-80    -48    
16     -384   
128    -144   
272    384    
-192   -560   
176    480    
272    304    
-336   -208   
336    -32    
0      368    
64     -48    
-64    384    
128    -160   
-96    304    
64     -1360  
-16    -96    
32     128    
80     96     
-112   160    
144    -32    
-112   -272   
128    144    
0      -16    
160    80     
16     144    
48     64     
176    64     
96     -48    
176    32     
64     -256   
160    256    
-48    224    
80     48     
48     192    
32     112    
80     -512   
32     -112   
144    48     
224    144    
80     80     
112    -144   
-32    80     
224    -80    
-32    96     
208    -16    
-144   48     
48     -352   
0      96     
48     -208   
-16    64     
80     96     
64     96     
80     96     
64     160    
48     48     
-160   -160   
-48    -400   
192    -160   
48     192    
0      -416   
80     224    
80     -624   
192    176    
16     0      
256    512    
160    464    
208    240    
176    192    
16     48     
224    48     
-224   -304   
432    -288   
-16    -176   
128    -112   
624    -32    
32     816    
-48    160    
-32    -272   
128    80     
240    112    
-512   -528   
880    -240   
304    528    
448    400    
-272   -688   
352    448    
-112   160    
304    -352   
0      672    
-272   -208   
-32    -336   
32     144    
-32    48     
-272   -1024  
64     192    
192    16     
-288   48     
304    -192   
128    224    
160    384    
-208   -496   
192    256    
128    272    
-240   -368   
112    -64    
-400   -544   
416    160    
-160   416    
16     -160   
96     -976   
-64    416    
208    -416   
16     -1168  
-128   -16    
336    -768   
-96    240    
-48    -1616  
256    128    
-80    32     
32     -16    
-32    -48    
-304   -832   
48     -528   
544    608    
-640   -528   
48     -464   
240    -400   
192    160    
16     256    
-64    -80    
128    0      
96     144    
96     288    
176    -1136  
-240   -352   
240    -592   
-16    -192   
288    -320   
16     544    
32     -176   
-176   208    
-224   64     
48     64     
-432   -96    
-240   -48    
192    -96    
48     -32    
16     -208   
0      -448   
64     16     
-176   128    
48     -192   
-112   -368   
0      -288   
-80    -256   
-32    -160   
48     -304   
64     -64    
32     -32    
-96    -304   
-176   -80    
-32    -208   
-144   -176   
224    -256   
80     96     
240    -128   
-272   32     
336    128    
-112   144    
96     96     
64     -48    
-80    -80    
160    -160   
-416   -32    
368    -64    
-640   -32    
96     -176   
-192   -32    
224    -80    
-176   -144   
-32    -288   
32     -64    
160    -48    
-64    192    
112    80     
-176   -160   
224    16     
-144   -272   
80     -336   
-32    -160   
-112   -128   
128    -80    
-1040  -96    
80     64     
272    160    
-240   48     
192    -32    
0      -688   
112    96     
48     96     
48     -96    
-96    336    
128    -112   
16     128    
320    336    
-448   32     
16     -128   
-176   48     
192    -112   
16     96     
112    -32    
80     32     
16     -816   
128    96     
-48    48     
96     -112   
-160   0      
128    -64    
-208   -16    
160    -144   
-96    0      
32     -336   
-288   0      
0      -160   
-32    32     
96     -336   
32     64     
64     -784   
96     -176   
-112   32     
128    96     
-240   -80    
224    32     
-208   -48    
-64    128    
16     0      
0      16     
-64    48     
112    -144   
-80    112    
496    -80    
-32    128    
16     -176   
416    -96    
16     32     
256    -96    
-96    -112   
80     -80    
-48    32     
64     48     
32     64     
48     32     
48     96     
112    112    
192    336    
-640   0      
16     64     
-96    48     
-80    -48    
-160   -80    
-1008  96     
-480   112    
320    64     
-144   -64    
176    160    
-96    96     
-32    -16    
-288   -96    
-256   -160   
0      -48    
-128   -16    
-160   -80    
176    80     
-176   160    
0      -160   
48     160    
96     96     
-240   48     
48     16     
128    192    
-368   144    
144    -112   
-240   -192   
368    0      
16     240    
-112   -128   
-80    96     
64     96     
-416   0      
208    128    
-288   128    
64     64     
-560   0      
0      -32    
48     80     
-96    64     
-240   -112   
-80    160    
80     -208   
304    288    
-64    -16    
-208   48     
-32    48     
208    224    
-64    -16    
-96    -128   
-48    112    
-32    -96    
-176   64     
-160   96     
0      176    
-272   -128   
112    176    
0      -144   
-64    -48    
32     144    
128    64     
48     80     
-112   192    
0      -48    
-208   -176   
224    -16    
-80    112    
208    0      
-400   32     
304    112    
-1216  16     
80     80     
-16    -32    
-96    -128   
96     64     
0      144    
96     80     
-224   -96    
-80    80     
-80    -32    
0      -48    
192    32     
-64    48     
-272   -224   
-64    128    
-96    -64    
-320   64     
112    -16    
48     48     
-96    96     
128    -48    
-64    16     
208    160    
-432   48     
208    -160   
-32    -80    
80     32     
16     48     
-96    0      
80     112    
-96    144    
16     112    
-16    -96    
16     -16    
-96    224    
-32    208    
48     0      
80     48     
96     224    
16     144    
-320   -352   
96     -192   
-96    400    
-160   -544   
272    384    
-352   32     
0      -448   
144    784    
-208   -496   
-96    224    
352    224    
-224   -96    
64     80     
-32    224    
-32    48     
304    928    
-528   -368   
-80    144    
16     -208   
-64    208    
32     352    
-256   -64    
304    48     
-112   48     
64     80     
-112   32     
192    80     
-64    0      
-80    16     
32     32     
0      80     
0      32     
32     64     
-64    48     
0      320    
-144   -176   
-16    -80    
160    240    
-32    192    
80     32     
-144   -16    
96     -192   
-64    32     
112    -80    
128    128    
80     288    
-256   -48    
336    224    
-256   128    
80     144    
0      16     
0      32     
48     80     
-64    64     
80     32     
-64    32     
-32    272    
0      544    
96     80     
-160   -48    
-48    80     
-128   -48    
32     96     
-160   -48    
208    32     
336    320    
0      448    
-48    224    
272    176    
80     320    
80     240    
96     0      
-176   96     
112    32     
-96    16     
96     48     
-288   -224   
240    48     
-192   112    
160    32     
-96    96     
144    0      
16     176    
96     112    
80     256    
-192   16     
432    240    
-48    400    
-32    160    
-16    128    
112    272    
16     96     
224    304    
-224   64     
-32    -1744  
48     560    
160    -112   
-256   -208   
208    0      
-16    48     
96     256    
-16    96     
-32    -48    
176    96     
-160   416    
336    144    
-176   48     
208    544    
-32    -144   
96     -576   
-80    32     
192    128    
-16    448    
-304   -368   
128    432    
-320   -720   
-80    -32    
-64    160    
64     400    
-32    -128   
64     48     
48     64     
-16    128    
288    144    
-96    -544   
432    0      
-352   -288   
224    -224   
0      80     
0      96     
0      0      
192    32     
16     128    
-64    64     
16     -96    
-80    112    
64     -320   
-192   64     
304    176    
16     16     
192    64     
-80    -928   
352    752    
-128   384    
-80    0      
224    112    
-224   80     
160    64     
128    64     
64     -32    
-96    -208   
240    -304   
64     -192   
416    -64    
-16    -352   
176    176    
-16    64     
32     208    
80     16     
48     -48    
128    -256   
96     48     
16     -128   
112    -16    
192    112    
64     -32    
112    112    
-80    -32    
144    256    
-256   -32    
80     64     
400    -128   
-208   192    
-16    -432   
16     0      
288    -112   
-224   176    
-32    16     
-112   128    
160    -16    
-48    32     
96     48     
-16    0      
128    16     
-32    -80    
160    16     
-112   -240   
128    128    
16     -320   
48     112    
96     48     
-96    80     
128    -16    
144    80     
48     96     
-64    144    
96     -16    
-96    -96    
-16    144    
0      -768   
-32    80     
16     -112   
64     144    
-96    -192   
128    208    
48     144    
16     -32    
16     208    
-32    48     
48     -64    
-32    16     
128    160    
32     160    
64     112    
-128   -352   
256    80     
-32    -224   
-16    80     
112    -32    
-160   16     
128    -224   
32     64     
-112   -16    
224    112    
-144   64     
96     -32    
80     16     
-48    -112   
256    208    
-80    -64    
-112   -64    
288    -32    
160    352    
288    -416   
-320   240    
448    112    
-144   -352   
160    80     
64     96     
80     -112   
-48    -160   
208    -928   
144    -32    
-176   -192   
64     -32    
80     112    
48     -176   
-32    80     
128    -320   
192    -448   
-144   80     
176    80     
-112   48     
-480   0      
0      -272   
-752   -96    
96     -80    
128    -96    
112    -80    
192    -16    
32     -128   
96     -32    
144    176    
80     -32    
-96    -336   
208    0      
224    -64    
-112   48     
64     32     
32     -144   
-416   208    
160    16     
336    160    
-272   -320   
112    -224   
240    -1424  
-48    -16    
240    0      
128    48     
112    32     
32     240    
64     96     
-32    -144   
-64    -48    
-32    -256   
-128   -160   
96     -176   
-16    -96    
128    -128   
32     -128   
80     -208   
-80    -224   
48     -1056  
-256   -32    
144    -176   
112    256    
-64    -96    
112    80     
-160   0      
-16    -32    
-144   176    
-224   16     
-368   16     
48     32     
112    -80    
80     32     
48     -32    
-80    -176   
48     64     
16     -32    
-16    0      
64     -16    
128    48     
-192   -48    
160    -80    
80     192    
64     -32    
-112   80     
-48    -112   
-320   -64    
0      -192   
64     48     
-16    -304   
64     -32    
-64    -1408  
464    464    
-32    144    
48     -224   
-80    -96    
112    -32    
112    496    
64     176    
-656   -176   
208    -144   
-1056  -112   
144    -80    
-16    32     
80     -48    
80     64     
64     -192   
64     -96    
-80    336    
64     -160   
32     32     
144    64     
-192   -64    
288    -32    
-208   32     
512    80     
-128   32     
96     -128   
-112   -48    
288    112    
144    128    
32     -592   
0      -48    
16     48     
-96    48     
112    192    
-32    16     
-192   -16    
80     -112   
-208   64     
256    144    
-64    80     
32     -16    
32     144    
0      -272   
0      0      
48     64     
-144   -240   
-112   -48    
224    32     
-128   48     
-32    -16    
-256   -272   
192    -336   
32     240    
304    352    
-272   464    
-1168  160    
32     -32    
64     -16    
16     544    
-48    -128   
0      64     
16     -32    
-608   32     
-48    -16    
112    112    
-48    -80    
-128   -48    
48     -304   
-1392  -176   
0      -96    
-448   256    
192    128    
-192   160    
-192   -144   
-208   -368   
-144   128    
80     240    
-272   -240   
80     -80    
64     144    
-16    176    
-32    -48    
16     32     
-32    16     
64     64     
80     0      
-112   320    
48     64     
-32    192    
-224   48     
-16    208    
-96    32     
-176   48     
224    -16    
-336   16     
32     48     
-816   -32    
-32    0      
-64    -48    
-32    128    
80     -48    
-48    64     
16     0      
-32    48     
-48    -16    
352    144    
-272   144    
400    112    
-208   256    
48     16     
-144   -208   
224    -240   
80     48     
-80    64     
112    64     
-144   48     
224    80     
-96    112    
32     48     
0      416    
80     224    
-192   16     
-64    48     
32     80     
-48    64     
112    48     
-224   64     
32     16     
-640   -240   
64     32     
80     32     
48     32     
0      32     
-80    80     
-112   -64    
112    -16    
-192   32     
32     -208   
0      352    
-16    32     
176    16     
-384   224    
0      64     
-192   -112   
80     112    
0      -16    
144    -16    
-208   112    
-96    -176   
0      80     
-112   160    
192    64     
64     80     
160    80     
-208   32     
96     80     
-128   32     
64     80     
-272   -480   
32     -16    
224    368    
-64    32     
80     -80    
64     352    
-32    208    
-112   -224   
48     192    
16     192    
-336   -864   
-144   112    
160    -592   
-16    384    
32     -96    
-112   80     
0      0      
-32    -304   
-16    528    
64     -160   
-64    -304   
112    416    
-48    -80    
-32    144    
-96    -32    
-16    368    
112    144    
-368   -176   
-112   -240   
64     144    
-144   512    
240    528    
64     320    
64     128    
0      64     
-112   -144   
32     32     
96     112    
-32    -16    
192    96     
-160   64     
464    176    
48     -48    
-32    -16    
0      128    
16     80     
-224   112    
-96    -16    
0      -112   
320    64     
-128   192    
32     48     
-64    0      
304    144    
-80    64     
16     -16    
-112   -96    
-16    96     
-80    -80    
-192   96     
512    464    
-32    -64    
176    48     
16     176    
-48    -80    
-96    176    
368    48     
-208   64     
400    -32    
-128   112    
288    16     
-576   -32    
352    144    
-288   0      
160    128    
16     112    
-112   96     
80     112    
-96    48     
80     64     
-64    16     
-160   -80    
336    32     
-384   112    
-16    -16    
-16    96     
288    176    
-128   336    
-256   128    
208    192    
-32    -96    
-96    64     
0      80     
-16    64     
128    288    
-176   128    
112    48     
-112   48     
-80    -48    
-256   -16    
96     112    
-96    48     
64     112    
-32    -112   
-144   -2128  
96     -64    
144    112    
16     112    
48     96     
64     32     
-16    -16    
112    96     
80     96     
-16    16     
64     96     
208    128    
32     -112   
-32    176    
32     -96    
80     -432   
0      208    
176    -16    
-64    96     
128    112    
32     96     
-80    -32    
112    -240   
-112   -112   
240    -16    
-176   32     
224    64     
-304   -144   
224    48     
64     192    
96     32     
16     48     
-64    32     
256    144    
-48    -16    
320    368    
-320   0      
32     112    
208    192    
-32    48     
-48    -96    
-32    208    
96     -192   
-112   -16    
32     160    
32     -272   
176    192    
-112   -432   
16     128    
192    128    
-96    32     
64     128    
80     256    
112    -432   
-32    64     
256    -64    
-128   -64    
64     128    
208    -144   
-128   64     
128    -144   
96     96     
-112   -1056  
176    16     
96     224    
0      32     
-80    48     
144    -16    
-32    64     
80     80     
-48    64     
64     64     
160    0      
48     0      
0      64     
-16    -64    
304    240    
-80    -16    
32     128    
16     -960   
-16    80     
64     -560   
80     96     
64     48     
48     128    
-272   208    
464    80     
-48    -16    
16     -128   
80     80     
-160   -96    
144    288    
112    -64    
-160   16     
80     -896   
-32    16     
32     112    
0      144    
48     48     
80     96     
-208   96     
224    -64    
-128   48     
112    16     
-48    -288   
112    -80    
-16    160    
-48    -144   
128    144    
-48    -48    
64     80     
-80    224    
144    128    
-16    96     
64     -32    
-48    -64    
224    128    
-208   -16    
288    -208   
-16    96     
128    32     
256    368    
-304   192    
-48    128    
32     -16    
112    160    
80     -288   
-144   -144   
-48    -304   
0      -576   
224    -1312  
-80    112    
-32    -2256  
-80    -336   
48     208    
-224   -720   
-352   -576   
272    -304   
32     160    
16     -112   
256    -1648  
-288   128    
144    -960   
-144   80     
96     32     
-32    -192   
128    -80    
336    -32    
-64    -128   
128    -128   
64     -144   
96     -80    
-96    -288   
0      -1040  
-112   -208   
-112   -544   
16     -144   
-176   -416   
288    160    
-512   -176   
224    -560   
-720   -112   
400    160    
-176   144    
304    224    
-16    -144   
16     -848   
16     16     
96     144    
0      -16    
208    64     
48     -32    
112    208    
-160   112    
-64    -176   
208    32     
-288   -368   
48     -288   
-16    -160   
144    128    
-80    -192   
-80    -1088  
112    144    
-272   -432   
144    128    
-32    -208   
112    64     
-16    -32    
80     -160   
144    480    
-112   112    
-336   -128   
32     0      
48     -48    
16     -48    
112    32     
16     -64    
96     32     
64     -352   
-48    32     
112    -48    
-80    176    
176    48     
-48    -160   
192    144    
96     128    
-128   -96    
224    -176   
-80    96     
-48    0      
-176   16     
64     -224   
-64    -96    
-144   -944   
48     -224   
96     -32    
112    128    
-128   -48    
80     -112   
-96    -64    
-176   -176   
-112   -192   
80     -80    
-240   -16    
-32    -608   
-784   256    
32     -304   
-208   -192   
192    -576   
-192   112    
320    -1648  
-160   48     
-64    16     
-16    -160   
-16    0      
80     80     
-32    16     
112    64     
-272   -80    
96     0      
-320   -176   
416    -560   
0      288    
128    160    
32     272    
-80    -992   
80     -336   
-32    64     
0      -288   
-352   32     
16     -64    
-64    -16    
256    608    
-128   0      
272    -112   
-256   272    
96     -64    
0      80     
-48    -208   
208    -96    
-112   -16    
128    -32    
32     16     
208    48     
-16    -80    
0      48     
-48    128    
-32    0      
0      -80    
48     160    
160    304    
224    736    
-240   144    
-528   -448   
-464   -448   
704    480    
-480   1008   
-32    -368   
-304   -368   
0      96     
32     16     
112    64     
-48    112    
48     240    
0      -96    
-32    64     
-432   -400   
16     304    
-160   -32    
-16    160    
112    192    
-176   -64    
-112   -160   
-288   -48    
0      160    
208    384    
-208   -48    
160    -64    
240    384    
-128   32     
128    192    
-128   -48    
0      592    
128    240    
-224   304    
160    704    
-48    176    
-208   96     
-384   -128   
-96    -32    
-80    -32    
-16    -48    
-304   0      
-32    -32    
-736   -464   
400    -16    
-96    32     
-48    176    
-240   -224   
-64    -192   
176    128    
64     208    
0      128    
-112   -320   
-80    144    
0      320    
-528   -144   
-560   -224   
96     16     
-192   48     
48     48     
-112   -32    
192    192    
-176   64     
-560   -144   
128    0      
96     16     
-80    -144   
-112   -112   
96     64     
-240   -16    
96     64     
-304   -16    
176    160    
112    112    
128    16     
-16    -144   
-48    -16    
80     16     
-80    -32    
160    -48    
-64    -80    
-144   176    
-112   -16    
96     -96    
16     128    
-32    160    
-32    16     
-16    288    
-800   -128   
80     176    
48     64     
-336   16     
-144   112    
208    -16    
-112   256    
-208   48     
16     16     
176    96     
32     96     
-64    144    
192    240    
-272   -32    
160    96     
-384   160    
64     176    
-176   144    
144    144    
-208   112    
400    192    
-336   224    
16     176    
-64    -48    
160    128    
80     48     
-144   -32    
96     80     
-208   -64    
80     128    
-16    176    
144    144    
128    128    
-288   64     
-80    16     
-304   -48    
112    64     
128    80     
-144   48     
128    32     
-192   64     
-144   -112   
-32    64     
0      -80    
0      144    
-192   32     
-80    -272   
80     32     
-48    64     
-80    0      
128    224    
-256   80     
128    176    
112    352    
-320   64     
80     -16    
-160   32     
192    112    
-32    32     
96     128    
-64    112    
-384   16     
400    240    
-112   -16    
-224   -208   
304    -48    
16     176    
192    -32    
-240   112    
64     64     
144    64     
-80    80     
80     80     
-32    48     
-176   144    
-16    -16    
32     -32    
64     96     
64     32     
-48    160    
128    144    
-176   128    
16     -80    
-64    96     
128    16     
-48    -48    
-80    32     
96     16     
-192   -32    
64     0      
128    48     
-32    -128   
96     32     
304    400    
-368   288    
-32    160    
112    80     
112    48     
-32    48     
-48    48     
144    112    
-160   112    
160    224    
-240   144    
80     80     
96     128    
-80    16     
192    176    
-176   64     
32     64     
80     80     
128    112    
-32    272    
96     160    
-48    0      
144    96     
-96    80     
112    80     
-112   144    
-80    144    
160    176    
48     96     
-96    48     
16     64     
-16    176    
192    128    
-176   96     
32     -32    
16     32     
-224   -48    
160    -16    
304    176    
-256   208    
32     64     
16     -16    
-32    224    
96     -240   
96     -240   
-16    80     
336    0      
-128   -320   
-80    -288   
256    192    
-288   160    
80     48     
-16    80     
-96    -32    
16     48     
-48    48     
80     -208   
-48    176    
-48    128    
48     112    
-80    0      
-80    -160   
-80    -144   
128    0      
-112   16     
128    272    
224    432    
-176   240    
128    176    
64     96     
-64    464    
192    64     
16     1040   
16     608    
64     160    
-48    112    
-32    -144   
144    128    
-112   -48    
192    304    
192    288    
-224   -192   
96     -96    
-128   -96    
80     -32    
-16    -192   
144    -48    
32     768    
176    -32    
-96    -352   
272    576    
-32    656    
16     -432   
48     144    
-16    -48    
96     224    
16     -16    
288    464    
-32    224    
32     -48    
64     256    
112    -432   
48     112    
48     -144   
-112   64     
224    272    
-288   -96    
880    -192   
-624   192    
384    -592   
-96    192    
288    208    
16     112    
64     112    
80     -288   
224    32     
-64    -320   
128    112    
-80    176    
32     96     
336    -176   
-352   16     
0      -464   
368    224    
-176   368    
64     -368   
320    208    
-160   240    
112    -208   
-128   -96    
32     -96    
16     -720   
144    720    
368    -304   
-144   64     
-64    -736   
176    0      
-64    128    
272    208    
-112   64     
-16    64     
128    48     
-80    80     
144    96     
-32    -112   
48     -64    
0      -144   
256    464    
-64    64     
144    400    
160    -112   
-160   -144   
112    -16    
-144   -128   
160    80     
-48    16     
176    224    
-32    -192   
-32    -192   
16     -656   
192    -160   
144    240    
-48    240    
32     -144   
208    112    
64     272    
320    416    
-192   -144   
96     272    
-208   -128   
480    -1200  
-160   -208   
128    0      
160    -1440  
16     -128   
-32    -64    
-160   -48    
400    112    
0      -48    
64     64     
32     -80    
128    -720   
0      16     
96     -176   
-80    80     
48     80     
-32    -64    
16     176    
32     -368   
-176   -416   
-48    -608   
352    752    
-48    192    
-208   -656   
448    16     
-144   768    
48     -448   
128    32     
80     304    
16     -336   
-512   -288   
208    128    
-32    -96    
96     -368   
80     208    
160    -944   
-80    48     
320    -1360  
-32    32     
-32    176    
16     -144   
0      128    
-128   80     
32     -112   
-32    96     
-432   -128   
-64    -288   
-1472  -304   
176    416    
-48    80     
-48    -288   
112    -672   
-48    -832   
368    48     
-208   -16    
160    -16    
96     -32    
32     16     
0      -48    
160    -256   
16     -64    
-80    128    
-32    96     
-64    -384   
272    112    
-144   -112   
48     32     
-208   -416   
-128   -288   
288    -912   
-96    128    
96     -32    
-128   96     
48     208    
-16    64     
-48    96     
-48    -160   
96     0      
-176   -304   
-544   -80    
112    -16    
-80    32     
16     -96    
-240   -176   
80     -1264  
-32    192    
128    80     
-32    80     
-16    -32    
16     -128   
272    16     
-320   -176   
224    64     
-128   0      
-112   48     
-160   -192   
32     -160   
-16    -240   
208    176    
32     -768   
-16    240    
288    -96    
-288   -64    
144    48     
-48    -192   
144    80     
-64    -96    
-16    32     
-192   -16    
-144   -112   
160    -192   
-448   176    
352    -160   
-288   112    
288    -192   
80     128    
96     -1376  
-96    -64    
-64    64     
-112   -80    
-400   16     
-160   -64    
-16    176    
224    64     
-64    128    
176    -224   
-112   96     
0      -240   
208    160    
80     112    
96     240    
-112   48     
80     16     
16     0      
-32    -48    
-224   -128   
-64    -288   
-272   -144   
160    32     
-224   -128   
-112   -160   
-208   208    
144    -112   
16     16     
-208   -336   
-112   -80    
-48    32     
-1264  -32    
0      64     
32     -128   
-48    -320   
256    -48    
80     160    
-80    48     
16     112    
-32    -48    
112    144    
-208   -192   
48     -16    
32     -240   
16     48     
32     64     
-64    64     
-240   -32    
-64    16     
-16    -32    
-48    -64    
144    0      
-64    -96    
96     -320   
-48    96     
240    144    
-464   -112   
144    32     
-48    -128   
-64    -32    
-48    0      
80     144    
-32    112    
-368   0      
-16    -80    
-160   96     
-16    32     
-80    0      
48     0      
-352   -64    
160    160    
-80    -144   
16     48     
208    176    
-272   -16    
96     64     
-96    32     
32     32     
-80    0      
0      -32    
-480   0      
96     0      
-656   0      
-192   112    
48     -48    
-64    160    
48     -96    
-32    96     
-32    16     
-176   48     
-16    176    
16     -32    
-80    16     
96     -32    
-160   64     
-256   -160   
-80    80     
-464   -176   
-176   -32    
0      -272   
48     176    
192    48     
-336   256    
-64    64     
-32    16     
112    96     
-208   -96    
-96    -80    
-16    -240   
-112   -112   
-64    16     
80     224    
-304   -32    
144    64     
-16    -112   
96     80     
-112   -272   
-64    -144   
112    16     
112    320    
-112   256    
-48    112    
128    64     
-192   -64    
96     -176   
480    288    
-208   928    
-416   48     
112    464    
-976   -16    
-48    208    
-32    64     
-112   64     
240    288    
-208   64     
96     320    
-16    64     
48     16     
-80    112    
16     208    
-224   -80    
64     144    
80     160    
-112   -288   
-80    -368   
16     96     
64     304    
160    160    
-160   144    
-128   -16    
48     -272   
-64    192    
176    224    
320    464    
-384   -336   
80     48     
-240   -128   
48     -464   
80     448    
128    208    
-16    224    
80     1168   
-208   -352   
0      32     
48     -48    
112    112    
32     16     
272    496    
-432   -384   
208    -16    
-112   304    
112    384    
0      -576   
64     112    
-288   48     
-80    -32    
112    80     
-64    -48    
16     368    
-64    -80    
-96    -48    
-96    320    
-240   -128   
-80    560    
-64    -240   
-112   -64    
96     80     
-224   -176   
160    272    
16     48     
-352   -224   
80     -288   
160    48     
208    176    
0      48     
16     112    
0      32     
176    784    
112    448    
-144   -544   
368    -224   
-80    288    
64     64     
-368   -496   
-144   -464   
288    240    
48     416    
240    64     
-160   -32    
128    128    
-16    64     
224    144    
-48    80     
-320   -144   
384    16     
-416   64     
64     -64    
-176   -272   
-288   -240   
320    192    
160    176    
480    480    
-544   -48    
400    -544   
-240   608    
272    -160   
48     240    
176    384    
-208   -240   
64     96     
-96    16     
336    688    
-144   0      
96     -384   
-16    304    
-144   -256   
-16    32     
112    64     
-112   64     
-96    176    
352    384    
-352   -32    
16     -240   
-64    464    
32     32     
-48    -64    
-48    240    
288    160    
-336   -128   
272    144    
-96    64     
96     80     
64     112    
16     80     
48     48     
32     64     
0      -96    
-256   256    
224    -208   
80     368    
592    736    
-848   -208   
208    -784   
144    -800   
16     672    
-80    -736   
288    -208   
-16    272    
80     560    
-80    -256   
-176   -704   
272    384    
0      400    
-16    160    
0      -192   
-48    16     
-96    -112   
112    -112   
-160   -32    
240    -400   
96     128    
-128   -208   
208    352    
0      80     
32     -16    
64     272    
-16    0      
224    -224   
-128   128    
176    64     
-64    80     
-48    0      
64     112    
32     -64    
0      96     
-16    304    
336    544    
-288   224    
192    -48    
64     16     
-112   -416   
128    160    
400    656    
-352   -592   
192    16     
-16    -192   
-64    -464   
80     224    
32     0      
80     -208   
-192   -992   
352    144    
-176   -432   
16     48     
-16    -32    
96     16     
64     32     
288    128    
-192   32     
80     80     
-96    0      
32     -112   
32     48     
112    -208   
32     64     
208    -128   
0      80     
96     -2128  
208    240    
-160   -32    
112    224    
-128   64     
-16    144    
128    48     
144    112    
-80    176    
112    -112   
96     96     
112    96     
128    16     
112    16     
-32    -144   
128    -32    
208    144    
-224   48     
176    80     
96     64     
64     96     
-512   16     
448    -256   
-80    32     
256    -128   
16     112    
-16    -272   
32     144    
-112   112    
176    160    
-32    -144   
96     -160   
96     16     
80     176    
-16    -16    
16     48     
-16    16     
112    -208   
96     48     
80     -176   
80     32     
-16    -304   
96     -240   
160    -160   
0      64     
208    -352   
112    0      
16     -320   
224    -528   
-64    16     
336    -832   
-16    -1360  
-32    -304   
32     -2288  
-16    -224   
96     0      
-192   -160   
64     80     
-112   64     
64     176    
256    224    
48     -528   
80     -176   
96     -96    
-48    -640   
-112   -256   
192    336    
208    224    
-112   -448   
176    -352   
272    -32    
96     176    
64     80     
176    -192   
112    -160   
-160   -128   
-128   -416   
128    176    
32     128    
0      0      
-736   -192   
208    64     
224    368    
-16    -80    
160    192    
128    -272   
-128   -160   
32     -272   
0      -112   
96     -400   
144    192    
-352   0      
144    80     
176    0      
48     -32    
-368   64     
96     -112   
-432   48     
80     -48    
-112   -96    
224    -272   
-16    0      
0      -1504  
176    32     
-16    -32    
272    112    
48     0      
96     48     
-48    -64    
-192   -256   
176    32     
-32    112    
-256   -48    
-96    -80    
144    -32    
80     -224   
-96    -32    
176    0      
-48    -16    
-32    -992   
80     64     
48     -96    
-272   -240   
176    -368   
0      144    
96     0      
-16    -32    
-480   -64    
112    -32    
-720   32     
-32    64     
-16    112    
144    -128   
64     0      
64     -432   
128    96     
128    -32    
128    -64    
96     80     
112    -160   
-256   0      
288    -32    
-336   -32    
160    -32    
-224   80     
112    -16    
64     48     
-64    -288   
48     64     
80     -352   
48     -32    
32     -256   
96     80     
32     16     
-80    -144   
-528   -16    
224    -64    
-336   -16    
208    48     
16     -64    
-64    -224   
144    -240   
-32    -240   
208    48     
-16    -80    
112    80     
-192   -16    
288    48     
-528   304    
352    -32    
-368   -64    
16     -144   
-16    -272   
-16    -112   
-64    64     
64     48     
-512   160    
112    0      
0      -160   
64     -192   
-112   160    
80     272    
0      128    
-16    16     
-112   -160   
0      112    
128    64     
-80    224    
32     -128   
16     -112   
112    192    
-16    176    
-48    -224   
32     144    
32     -960   
-1360  112    
-272   -256   
-1248  -992   
208    400    
224    -368   
0      16     
-112   352    
-160   -32    
-16    -256   
112    192    
-528   -144   
16     -32    
32     -144   
-96    96     
-80    -288   
-192   96     
-16    64     
-64    128    
-176   -352   
-368   0      
-176   64     
224    16     
-32    96     
128    96     
-128   80     
-256   -32    
-240   80     
-304   -448   
320    16     
-160   0      
-32    32     
-144   128    
-80    112    
16     160    
-336   -96    
-64    336    
-576   -160   
112    -96    
-48    144    
16     64     
-144   -96    
-48    32     
-320   -320   
384    -192   
-320   -16    
256    -64    
-96    208    
64     64     
144    -320   
-96    96     
96     128    
48     -224   
32     144    
-448   -80    
-112   320    
-192   -224   
-112   -112   
160    32     
-96    16     
-160   -336   
0      128    
112    112    
-48    176    
144    -48    
64     224    
48     96     
128    16     
80     544    
-128   448    
288    352    
-144   128    
32     -16    
-192   -112   
96     192    
-48    96     
48     368    
16     288    
128    -256   
-160   112    
-112   -304   
288    112    
-128   176    
224    320    
-480   80     
592    32     
-1120  -48    
64     32     
48     96     
64     -336   
16     240    
-16    -80    
192    208    
-448   112    
96     -160   
128    240    
-96    640    
-224   -176   
-144   368    
32     -512   
-112   112    
-848   -256   
352    -16    
-256   -224   
160    512    
-208   -272   
32     64     
-688   -1024  
288    -336   
192    1504   
-384   -576   
80     -208   
-176   400    
176    32     
-160   240    
128    112    
-128   48     
-224   576    
32     -480   
64     176    
-160   -160   
64     176    
-48    288    
-32    -304   
-144   -80    
-32    112    
160    336    
-272   32     
16     96     
-96    112    
-16    128    
-160   128    
-240   -48    
128    0      
-112   -48    
176    320    
32     -32    
-64    -80    
176    464    
96     384    
-128   -272   
16     -32    
32     -144   
96     -96    
112    512    
-48    608    
48     32     
-96    -192   
80     160    
-128   -384   
-48    -32    
240    64     
-32    304    
288    240    
-240   80     
160    272    
-240   -384   
-48    -320   
176    -80    
-160   112    
0      32     
16     16     
128    48     
-64    144    
96     144    
112    336    
-64    208    
-80    16     
0      -192   
112    32     
-16    192    
16     64     
16     -64    
-160   -32    
80     112    
-240   80     
112    144    
16     32     
-96    80     
128    128    
-16    64     
80     112    
-128   64     
208    352    
-144   320    
-80    96     
112    64     
-192   -96    
-32    144    
80     48     
-48    112    
128    32     
-48    128    
128    48     
80     320    
-96    -128   
-64    96     
352    128    
-144   176    
-80    64     
-80    48     
64     80     
-16    64     
32     128    
32     32     
208    224    
-96    112    
112    112    
-64    96     
128    128    
-48    64     
0      64     
64     0      
-32    0      
32     96     
0      240    
96     96     
-80    -400   
160    -112   
176    32     
-256   -288   
-32    -96    
-80    -32    
112    160    
-48    96     
-32    -272   
-32    -96    
-128   192    
80     48     
-16    48     
32     160    
-32    176    
128    192    
-144   96     
-64    64     
-144   -1328  
176    48     
240    192    
160    192    
-80    288    
80     320    
48     80     
0      64     
-48    144    
96     16     
-160   -192   
112    96     
-128   0      
192    -96    
80     160    
176    0      
64     96     
112    192    
-96    -192   
-80    -208   
288    96     
64     144    
16     80     
112    80     
176    32     
16     0      
176    96     
48     64     
208    80     
-112   208    
0      128    
-128   32     
384    0      
-416   160    
48     64     
96     16     
32     112    
-80    -80    
-176   -144   
320    80     
-32    48     
64     -96    
0      48     
224    80     
-96    48     
0      -176   
224    32     
-64    -800   
80     -48    
-48    320    
224    0      
-112   -112   
160    96     
160    16     
0      144    
224    32     
32     64     
16     112    
176    -128   
48     64     
224    0      
80     112    
-112   -32    
320    64     
-96    -832   
96     16     
-32    -16    
80     96     
128    208    
48     192    
-80    80     
-16    -176   
0      -80    
304    -544   
0      64     
64     -304   
48     112    
64     -560   
-32    240    
96     -736   
32     112    
128    112    
48     128    
16     16     
128    112    
176    144    
-96    -160   
176    144    
-16    0      
48     96     
32     -112   
256    176    
160    -160   
48     64     
48     -32    
144    128    
48     96     
144    336    
144    -160   
-128   144    
144    96     
16     -32    
80     80     
176    96     
-224   176    
0      -464   
240    -16    
176    -48    
-32    -96    
80     192    
112    -144   
96     32     
-160   -1296  
16     48     
-288   -112   
128    -96    
-16    -112   
0      -1312  
-16    -224   
-48    -112   
176    480    
96     736    
-112   -528   
-80    -480   
208    512    
-128   -480   
144    -80    
-16    -768   
80     32     
-288   16     
48     -112   
48     -144   
16     -464   
80     -128   
32     -272   
0      -48    
64     48     
208    704    
-64    -416   
-128   -128   
-64    176    
192    -528   
0      112    
48     -160   
0      16     
-16    -48    
-32    32     
32     -16    
0      -208   
-16    80     
-16    -64    
320    -560   
-176   624    
-32    -288   
16     -208   
96     80     
-32    32     
-64    -96    
-16    -112   
-32    -64    
0      64     
-992   336    
-160   -288   
144    -320   
48     -208   
0      -208   
112    -1104  
48     0      
112    -48    
-32    224    
80     -320   
-48    -160   
-96    -240   
-80    -352   
0      -80    
-48    64     
176    80     
-16    -16    
80     0      
16     -96    
288    48     
-160   -288   
240    80     
32     -736   
160    -16    
-80    -80    
192    96     
-144   32     
112    0      
448    432    
-176   496    
-352   192    
176    -160   
-416   256    
96     -16    
32     16     
0      -288   
-32    -128   
-32    -800   
-128   -64    
336    -128   
-64    96     
48     192    
128    32     
-272   32     
64     32     
-240   -128   
112    -240   
-624   -272   
-112   -256   
-96    -32    
96     -304   
352    160    
0      -480   
368    192    
48     336    
-96    112    
384    -256   
64     176    
-464   -144   
176    -592   
176    432    
64     -32    
-224   32     
240    0      
-64    176    
192    -304   
80     32     
112    -80    
16     608    
0      240    
-384   -144   
-432   -272   
-176   48     
-48    -80    
0      0      
80     224    
16     96     
-256   -176   
-80    -784   
432    -176   
32     480    
-96    -496   
144    64     
48     112    
-48    -112   
144    256    
-256   80     
-16    464    
-128   64     
-16    144    
-208   144    
32     704    
-128   176    
-112   -368   
-176   16     
-288   256    
-176   160    
-240   48     
112    -288   
-240   -400   
-480   -560   
-112   -352   
-240   -176   
-368   -432   
384    -16    
112    64     
-288   -144   
-144   -144   
-208   -80    
-64    -16    
-608   368    
144    512    
-176   192    
-256   -32    
96     128    
-192   80     
-112   48     
-144   32     
-64    32     
144    -112   
-96    -16    
320    -128   
-16    48     
16     -240   
-80    -144   
80     -128   
336    272    
-112   176    
48     368    
112    208    
-624   -144   
32     32     
-128   -96    
0      160    
-576   -32    
-224   -96    
144    -304   
-144   0      
-112   -496   
288    96     
80     32     
112    160    
-128   80     
16     -16    
-16    -48    
-64    16     
-64    -32    
64     -80    
-80    0      
144    -32    
-192   32     
176    -64    
32     64     
0      16     
128    144    
-192   0      
-32    32     
-112   96     
-16    0      
-192   -32    
240    192    
-96    48     
-32    -16    
48     80     
-192   -32    
-64    48     
112    -16    
-240   128    
112    -16    
-96    -480   
16     -48    
-112   -16    
16     48     
32     160    
0      0      
32     208    
-64    0      
0      48     
-304   -48    
160    48     
0      80     
-224   64     
48     -32    
-64    -320   
112    16     
48     32     
0      -32    
-16    0      
160    128    
-32    64     
-112   112    
112    16     
-80    80     
48     32     
48     48     
128    128    
-448   -128   
48     96     
-320   -144   
-112   128    
112    96     
-96    64     
48     48     
-48    32     
112    192    
-64    32     
32     -16    
-16    16     
0      112    
16     80     
-64    -48    
-368   -176   
176    32     
-496   80     
144    192    
80     144    
144    80     
-128   96     
144    -128   
-240   -304   
288    32     
-160   144    
80     176    
-32    112    
-112   112    
96     32     
-288   -272   
64     -32    
16     32     
304    304    
-48    208    
-96    128    
64     -96    
160    96     
-144   96     
0      -64    
-80    -32    
48     -64    
-16    128    
-16    -64    
80     112    
16     112    
-176   0      
112    112    
-48    112    
48     32     
32     96     
64     112    
48     16     
-16    208    
-48    16     
0      80     
-16    32     
-32    112    
288    384    
-256   432    
-272   -128   
-48    -112   
80     64     
-96    -160   
144    112    
-16    48     
48     32     
-64    48     
32     0      
-96    64     
128    224    
-320   -48    
48     64     
16     -48    
-64    96     
-80    0      
0      16     
-32    -112   
304    -48    
0      160    
128    128    
112    64     
96     352    
-144   -16    
32     96     
32     112    
0      0      
16     112    
112    128    
-96    32     
48     16     
144    -32    
16     16     
144    128    
-32    16     
48     64     
0      80     
-96    -48    
192    96     
-16    112    
128    80     
-16    0      
352    320    
-416   48     
112    96     
96     144    
224    80     
-80    80     
160    -32    
-80    208    
192    304    
-272   240    
0      128    
-16    -32    
-192   -288   
448    176    
-64    32     
96     48     
-432   -128   
448    -64    
0      112    
-112   -96    
96     64     
96     32     
144    160    
-80    96     
192    208    
48     240    
0      352    
-112   176    
208    -48    
-48    -208   
0      48     
-96    -32    
144    -128   
16     208    
-16    -368   
96     128    
176    -112   
-32    288    
-128   224    
144    160    
16     256    
304    320    
-272   320    
192    -288   
-32    192    
352    224    
-160   208    
64     -432   
-32    -16    
-48    -320   
16     -176   
0      240    
32     48     
-16    96     
32     32     
96     224    
16     0      
64     320    
-64    0      
528    432    
-288   -48    
-16    -416   
64     -16    
192    368    
-320   -336   
480    80     
-48    -496   
16     64     
96     112    
64     80     
64     16     
80     128    
-16    16     
96     64     
0      48     
256    144    
-176   -48    
144    -112   
96     224    
96     -256   
64     48     
-16    -240   
160    0      
32     80     
96     80     
-64    48     
208    80     
-96    144    
-32    16     
160    80     
128    256    
-32    256    
-208   -256   
64     -32    
-48    -176   
48     112    
-48    16     
64     80     
48     -1120  
-80    -80    
32     -128   
-16    48     
64     32     
-32    192    
32     48     
32     -64    
96     336    
144    0      
272    240    
16     -112   
-64    240    
256    -256   
-336   192    
112    -208   
-96    32     
0      112    
48     96     
16     64     
-16    160    
336    512    
16     -80    
48     32     
-64    0      
160    48     
16     -48    
32     112    
64     -128   
-80    -96    
48     -672   
304    272    
96     128    
0      32     
-48    -48    
-176   -384   
96     -64    
32     -112   
16     32     
96     -48    
368    288    
-160   288    
96     -368   
16     -544   
208    352    
16     112    
32     -1344  
-112   -528   
-48    -1488  
-192   448    
-336   416    
-544   -576   
480    -288   
-400   48     
288    -128   
-192   160    
288    48     
192    192    
-224   -384   
160    -368   
-112   48     
64     -592   
560    944    
-496   -736   
-16    -816   
-160   -80    
-160   -96    
-32    -272   
32     -112   
224    416    
-256   144    
128    128    
-112   -192   
128    -176   
16     -224   
80     -112   
0      -64    
-32    0      
208    -144   
16     -16    
256    464    
-288   0      
208    96     
32     -80    
160    -32    
0      -336   
160    160    
304    -2064  
-192   -16    
240    -176   
-256   -64    
96     -208   
144    64     
-352   -64    
48     -48    
-352   -160   
288    288    
-1024  64     
96     -64    
-48    16     
48     -96    
-464   -208   
224    -496   
-144   0      
64     -16    
-176   80     
96     -64    
128    112    
-64    48     
-16    48     
-144   96     
0      224    
48     32     
288    32     
-64    16     
64     -368   
-112   -128   
240    -752   
32     160    
112    -1344  
-32    144    
64     0      
32     -48    
16     0      
-16    -48    
16     -32    
32     -16    
-208   16     
160    -160   
-2640  -144   
64     0      
80     -160   
-32    -176   
-16    96     
80     -416   
-128   48     
48     144    
-96    -304   
304    -320   
64     112    
48     80     
-96    32     
-80    -80    
208    16     
-64    96     
192    0      
-336   -16    
48     -288   
192    112    
32     -256   
64     144    
176    48     
48     -32    
-48    32     
48     -32    
-48    -64    
-32    -64    
0      80     
192    -48    
-256   -112   
240    -144   
-80    -16    
-320   -192   
224    48     
-64    -288   
-16    176    
-128   48     
-64    -80    
16     96     
192    -144   
-336   -16    
320    -64    
-288   48     
224    -112   
-240   16     
64     -336   
-32    -48    
16     -160   
112    160    
-96    -176   
-576   32     
-48    -16    
-16    272    
32     0      
-48    -32    
-48    48     
208    16     
-480   -96    
144    -48    
-48    80     
-176   -480   
32     -32    
-672   -112   
-144   144    
-464   -208   
-976   -32    
-16    80     
-320   192    
32     48     
-720   -16    
16     160    
-80    -128   
-128   16     
112    -32    
-160   -64    
48     -96    
32     80     
16     -208   
-368   160    
400    0      
-32    176    
-304   224    
-48    -16    
-96    -16    
-592   -48    
-128   -80    
64     -48    
-96    -80    
96     -240   
288    224    
-464   -112   
176    144    
-272   -176   
-16    96     
240    64     
-48    176    
-48    80     
-112   48     
112    112    
-32    -48    
0      48     
-112   208    
80     80     
-48    -16    
192    128    
-336   -144   
176    32     
-64    -192   
64     64     
160    320    
-464   224    
16     -96    
-288   0      
176    128    
-32    16     
-128   0      
-16    80     
16     96     
-960   -64    
64     64     
288    64     
-256   192    
256    -16    
-288   16     
80     -16    
-240   16     
32     112    
0      48     
16     64     
-112   -96    
-32    16     
-256   -96    
-48    32     
-944   -160   
96     80     
0      -128   
160    112    
-32    48     
160    32     
-64    112    
704    720    
-400   752    
-64    112    
-144   -192   
48     16     
128    144    
-432   128    
-16    32     
-272   -16    
320    96     
-48    0      
160    48     
-304   16     
320    80     
208    16     
-96    16     
-48    0      
96     176    
64     64     
-16    -32    
144    192    
-112   64     
-16    96     
-256   -48    
176    96     
-1456  80     
-96    32     
-128   32     
144    16     
80     192    
-304   -672   
-176   -352   
160    -96    
-224   -64    
-48    48     
-144   -16    
-48    -224   
48     -192   
-64    -128   
-176   -128   
-336   -16    
-272   -224   
48     416    
224    688    
-32    64     
0      16     
-112   32     
64     32     
112    144    
-112   16     
128    128    
-144   16     
32     176    
-80    -272   
0      -48    
192    336    
160    96     
-160   -160   
48     400    
-160   1072   
320    -16    
-400   -16    
288    64     
-96    48     
48     272    
-240   -96    
-16    32     
32     672    
-48    -272   
-64    -224   
-48    304    
32     224    
-48    -272   
-144   -192   
64     16     
-144   -192   
80     -416   
96     80     
64     272    
-48    -192   
0      32     
80     16     
16     -16    
-64    16     
-96    -128   
192    48     
-112   80     
176    48     
96     160    
-128   80     
-80    48     
80     -224   
0      32     
-128   160    
192    32     
-112   80     
48     64     
-16    80     
176    80     
-112   48     
112    96     
80     96     
-16    80     
-48    48     
64     64     
-176   -64    
112    -160   
32     96     
32     -144   
96     -96    
96     0      
-32    64     
-16    288    
16     208    
-16    16     
-48    -64    
32     16     
16     32     
-96    0      
192    240    
-16    368    
16     64     
-112   -112   
80     0      
48     48     
0      48     
-112   96     
80     -320   
16     320    
80     192    
-224   -128   
96     0      
-96    -32    
160    96     
-80    48     
176    96     
16     144    
0      496    
128    272    
-368   -352   
240    96     
96     80     
176    496    
64     208    
32     48     
-32    96     
96     80     
32     80     
336    304    
-176   384    
-64    96     
96     32     
-16    -16    
160    -16    
-80    64     
208    96     
-144   16     
-112   -576   
272    448    
96     832    
-384   -416   
-112   -1040  
256    128    
-192   656    
-16    -640   
48     496    
-112   -208   
80     -656   
160    768    
-96    208    
144    96     
-16    -80    
32     -176   
160    -224   
16     -528   
64     112    
48     48     
-32    48     
-32    -400   
128    -16    
-64    -320   
96     0      
-32    112    
112    144    
32     160    
64     416    
256    496    
-80    16     
224    192    
-96    32     
272    832    
112    -704   
-160   -208   
208    -192   
16     -96    
192    32     
-64    32     
304    336    
-480   -64    
112    368    
208    -64    
-64    64     
16     -160   
48     32     
208    -592   
-48    96     
208    0      
64     32     
-96    96     
624    -128   
-112   128    
384    112    
-240   -80    
240    112    
48     144    
-16    32     
-96    144    
464    -128   
16     272    
192    -240   
-128   -16    
256    -128   
-112   64     
-160   -640   
256    128    
16     80     
-176   176    
112    -32    
224    336    
-16    0      
32     112    
176    32     
-48    -272   
-32    64     
32     -144   
400    176    
-96    48     
112    48     
16     -16    
64     -32    
-80    48     
128    16     
-80    32     
96     -400   
-128   256    
64     -560   
32     224    
0      -192   
176    192    
32     -48    
64     112    
32     -224   
48     112    
32     -512   
16     16     
-48    48     
288    -32    
-144   96     
64     -80    
-32    64     
96     -80    
128    16     
32     -64    
208    80     
-256   -304   
208    96     
64     16     
144    48     
32     48     
16     -352   
96     80     
144    -208   
-16    -608   
-608   16     
80     -288   
-176   -32    
288    -624   
144    -32    
-80    160    
48     0      
176    16     
32     -16    
208    -64    
-16    64     
128    -208   
32     32     
96     0      
-16    -288   
-688   160    
112    -32    
64     -96    
-32    -128   
208    -160   
16     -576   
192    16     
16     16     
16     -112   
-48    -96    
320    32     
-96    -224   
176    144    
0      16     
16     -80    
16     288    
368    240    
-496   -32    
272    0      
128    -32    
-128   -240   
-16    0      
144    -736   
0      -80    
0      -208   
64     128    
128    -144   
-112   64     
112    -160   
-16    -128   
112    -48    
80     -16    
-544   0      
32     16     
96     -48    
128    -288   
32     224    
112    -608   
32     0      
128    16     
96     208    
-80    0      
32     -48    
-112   -48    
48     -176   
-160   16     
64     -176   
-160   -16    
32     -160   
288    0      
-144   -48    
80     -16    
-224   -224   
288    80     
-96    -976   
-64    192    
96     -160   
0      -64    
96     16     
-16    -96    
16     -48    
0      80     
16     -80    
80     -144   
-1280  -16    
-32    112    
128    64     
32     -128   
288    80     
-288   -912   
160    -32    
0      48     
96     0      
-16    160    
32     32     
-112   -96    
176    -160   
-464   48     
-96    -208   
-128   -128   
192    -64    
-32    128    
48     -112   
-48    48     
16     -336   
64     48     
-32    64     
0      -16    
-608   0      
160    -32    
-320   -80    
48     -224   
96     320    
-160   -256   
-96    -32    
64     224    
-80    304    
-80    -160   
-240   -144   
16     -784   
224    16     
-112   112    
96     0      
-160   64     
160    64     
-112   96     
0      128    
-48    32     
-48    64     
-288   -336   
224    -128   
-240   528    
304    -48    
0      -64    
80     112    
-1200  112    
-160   128    
80     192    
-304   80     
-48    64     
-32    -112   
0      -192   
-208   -96    
64     -192   
48     48     
112    128    
80     32     
-320   -528   
96     -48    
32     -144   
-272   -16    
-32    64     
-528   -16    
208    160    
-1488  112    
-32    112    
96     -96    
-272   128    
16     80     
128    96     
-48    -160   
176    192    
-368   -336   
-64    0      
-112   -192   
-64    432    
32     -208   
-272   -592   
352    352    
-336   272    
16     -320   
224    16     
0      160    
80     -64    
-192   64     
-48    -384   
256    512    
-464   -16    
0      -304   
96     224    
-96    224    
0      -176   
-128   -32    
-96    192    
-432   -64    
-192   64     
-80    64     
-304   0      
16     -16    
320    144    
-144   -128   
64     64     
16     -64    
-32    -16    
-32    -16    
-64    -48    
96     -16    
16     192    
0      624    
-80    80     
-208   -240   
80     -320   
-240   -144   
-128   -64    
64     96     
112    320    
464    672    
-64    432    
128    336    
-208   -208   
96     -16    
96     464    
-16    368    
-144   64     
-176   -288   
32     -352   
-304   -352   
-64    -272   
-320   -416   
-64    64     
176    80     
48     -16    
96     -64    
-448   0      
352    128    
-192   48     
80     96     
-32    0      
80     80     
-96    0      
16     96     
-112   -32    
48     48     
-64    16     
-112   16     
128    16     
-224   -144   
48     -16    
-128   64     
64     -256   
-64    -160   
-32    112    
-80    -32    
64     160    
-96    384    
144    560    
0      304    
-320   -64    
80     -16    
-112   304    
-1776  96     
16     0      
0      -80    
16     80     
0      0      
32     -176   
-48    -80    
-48    -336   
-96    -176   
112    336    
128    -352   
48     432    
96     240    
-176   -112   
32     304    
96     -208   
-192   -608   
-224   -976   
320    -64    
-16    1232   
-288   -256   
80     -32    
0      176    
-16    272    
0      -128   
-128   -176   
-112   -32    
-160   -352   
192    384    
-80    -224   
272    192    
128    160    
-80    -48    
80     -48    
-64    -128   
80     192    
16     256    
-80    32     
32     -48    
32     288    
-48    672    
-272   176    
144    176    
128    240    
-32    -64    
176    80     
112    208    
-176   -16    
16     80     
32     64     
80     128    
-32    -16    
16     32     
0      96     
-32    0      
48     32     
48     16     
176    352    
-352   -160   
96     160    
16     304    
-64    0      
-16    32     
192    64     
112    0      
-80    -64    
80     -112   
128    144    
-128   272    
-176   -112   
288    32     
32     96     
80     128    
-80    32     
48     32     
96     -16    
80     128    
0      0      
368    400    
-400   192    
80     -80    
-208   -32    
128    -48    
16     -128   
-96    -64    
192    224    
-128   96     
144    240    
-16    16     
-16    64     
-80    -64    
48     64     
-48    16     
-16    96     
-16    192    
352    288    
-224   112    
64     112    
192    -32    
64     64     
160    96     
96     0      
240    -352   
-208   0      
144    144    
-128   192    
-80    208    
-288   48     
-64    -160   
-448   -416   
384    64     
-160   48     
-16    48     
80     208    
-112   -96    
208    272    
-192   96     
-32    -432   
-64    -48    
208    128    
-224   80     
256    48     
-32    48     
464    272    
-176   272    
32     224    
32     -80    
16     16     
128    -16    
0      0      
-64    48     
64     64     
80     -192   
288    192    
-288   -224   
176    112    
112    16     
-32    -80    
-96    80     
-32    32     
-112   64     
128    96     
-16    -32    
16     16     
-160   0      
256    144    
-48    64     
32     -384   
80     128    
64     -272   
80     96     
-16    128    
-32    64     
0      128    
96     208    
-48    -176   
0      64     
192    48     
16     -224   
-224   224    
304    -176   
-96    48     
0      -96    
112    80     
96     -144   
-112   32     
16     -1264  
112    240    
64     -192   
-96    64     
16     112    
176    144    
-112   -80    
16     48     
-80    -64    
64     -64    
192    32     
-208   -128   
112    256    
-112   -368   
16     80     
64     -528   
272    176    
-304   144    
112    32     
-64    96     
64     128    
16     16     
64     160    
48     144    
112    48     
80     96     
16     -64    
16     32     
16     -624   
64     -16    
96     0      
16     192    
-112   64     
32     112    
48     48     
80     112    
-32    80     
48     -16    
64     16     
64     -560   
96     96     
32     -320   
80     128    
96     -224   
80     112    
16     -64    
96     64     
0      64     
0      96     
64     32     
176    160    
0      192    
-16    -80    
112    176    
96     -96    
160    96     
112    32     
16     160    
160    0      
-192   80     
256    -240   
-16    144    
224    -80    
-80    144    
-208   -464   
160    -1840  
352    272    
-192   -192   
288    -1312  
-256   -64    
0      -16    
-32    -48    
176    160    
-16    -32    
112    112    
96     16     
-16    224    
80     -128   
-144   -688   
320    368    
-288   -560   
320    -96    
-304   -256   
144    -128   
-32    16     
0      -240   
64     -16    
80     -320   
32     -192   
48     48     
176    48     
128    -608   
64     464    
112    -1136  
-192   176    
368    240    
-320   -896   
-1120  96     
-64    96     
192    96     
48     0      
-240   -464   
144    -64    
32     128    
16     80     
-16    -96    
240    -48    
-64    384    
-96    -96    
-16    0      
-96    128    
112    -256   
-352   -48    
80     -80    
80     -160   
-96    -400   
448    -384   
96     256    
272    384    
64     -3120  
-96    -272   
224    144    
16     256    
192    16     
-80    96     
0      -48    
48     -32    
-544   48     
64     -304   
-1680  -96    
64     -320   
496    -80    
-16    32     
48     -128   
-80    -1136  
128    -48    
80     800    
208    448    
-240   128    
160    -208   
-640   -96    
144    -32    
-288   288    
-32    -16    
-368   272    
-144   -80    
112    -128   
80     176    
-224   -176   
-112   -560   
320    704    
64     272    
48     -560   
-192   256    
32     -48    
-32    -192   
-32    -288   
528    0      
-96    736    
-256   32     
-48    -448   
-560   400    
144    16     
-256   -240   
80     -416   
-144   -32    
80     -992   
96     96     
-160   16     
80     -208   
176    16     
-224   -32    
48     0      
64     -80    
-112   -64    
160    64     
-272   160    
-128   -208   
-16    -192   
-144   -864   
128    432    
64     -576   
-128   -480   
-80    -96    
192    288    
-432   -80    
32     -320   
32     -80    
-208   336    
32     -256   
-80    -752   
-192   736    
160    -160   
16     112    
96     -64    
-96    -416   
304    64     
80     384    
-416   80     
-32    -1040  
-464   -1200  
224    -336   
-48    368    
208    544    
-112   512    
528    -80    
-1392  -64    
-32    -208   
128    64     
144    -144   
-64    160    
-16    32     
-784   -96    
-96    16     
80     -16    
-112   -32    
80     80     
16     -208   
-48    -96    
0      96     
-64    64     
-96    -208   
-560   -128   
128    256    
-64    16     
0      304    
-16    224    
64     -384   
-128   128    
-304   -96    
192    96     
-656   224    
32     -64    
128    -96    
16     208    
176    144    
48     -240   
128    -272   
96     80     
64     -128   
-400   48     
96     224    
-288   336    
32     256    
-80    112    
-208   -304   
-368   -464   
-48    80     
-112   -272   
160    64     
-16    80     
240    288    
-128   -16    
96     80     
-208   -336   
-48    -272   
0      48     
64     -128   
64     0      
-496   -368   
128    -160   
-288   -80    
-64    -80    
-752   -16    
16     32     
-64    -176   
64     80     
-16    -96    
16     -32    
0      112    
128    0      
64     64     
-64    48     
-48    16     
-80    128    
64     80     
-96    0      
32     32     
-144   48     
-160   80     
-672   112    
0      -80    
-16    0      
48     96     
0      64     
16     64     
-32    48     
-32    -32    
48     112    
80     0      
256    -80    
-336   160    
224    112    
-336   96     
160    272    
-496   192    
-32    304    
-48    32     
-272   -160   
64     176    
-48    64     
-32    96     
-80    96     
-16    0      
64     112    
112    112    
-32    192    
-112   144    
-208   -240   
-48    48     
144    832    
304    352    
-240   -160   
224    -176   
80     -192   
112    -144   
160    192    
176    320    
-64    -32    
-80    -176   
112    112    
32     112    
-64    256    
-80    -96    
-32    64     
-224   -80    
48     128    
-176   -64    
-64    80     
-80    -32    
-48    176    
-80    -32    
-64    80     
64     48     
-80    64     
16     112    
112    0      
-432   96     
400    16     
48     288    
-320   240    
48     256    
144    112    
80     48     
-144   -144   
80     -64    
-128   -112   
0      0      
128    192    
-96    48     
-48    -64    
-112   192    
224    176    
-352   -48    
32     96     
-112   -224   
-48    96     
160    288    
-192   32     
-224   -240   
192    80     
-128   32     
-96    -16    
80     80     
128    112    
-48    160    
-80    -16    
0      48     
16     192    
-272   176    
-32    -48    
-96    48     
144    96     
-48    80     
128    96     
80     -48    
-208   -128   
160    32     
-64    144    
-144   -48    
-48    16     
-48    0      
96     96     
-112   32     
160    96     
48     -96    
-176   -64    
288    160    
-112   -224   
96     -192   
16     272    
272    48     
-160   -32    
64     112    
0      0      
96     64     
0      80     
112    112    
-64    -48    
48     -112   
-16    -144   
80     144    
16     192    
16     128    
0      144    
0      80     
32     0      
256    224    
-80    352    
80     96     
16     16     
160    48     
112    128    
-160   80     
48     -448   
96     272    
192    240    
-16    16     
32     32     
80     160    
128    256    
-32    112    
16     96     
80     -16    
-48    -80    
96     -64    
-80    -176   
-48    -80    
-32    -176   
112    -96    
-16    144    
-16    -208   
-64    -256   
208    96     
224    80     
64     320    
256    352    
112    288    
-64    160    
-32    64     
64     80     
-160   272    
64     144    
80     16     
-32    -256   
96     32     
48     -32    
176    -96    
-64    -240   
32     -464   
-80    176    
176    400    
-64    96     
112    112    
-96    0      
64     64     
112    240    
144    336    
-32    -16    
-160   -768   
224    80     
-144   -256   
256    -48    
0      -144   
16     16     
48     32     
256    448    
-160   -176   
80     240    
0      -96    
64     -112   
-64    80     
16     -240   
32     112    
64     16     
144    112    
-48    -288   
0      336    
80     -32    
64     16     
80     208    
0      176    
32     -96    
160    176    
-240   -320   
-144   -192   
-48    -384   
128    -304   
240    192    
160    384    
144    -80    
208    -32    
32     176    
80     -1968  
0      -48    
112    528    
-96    -80    
-96    -208   
128    288    
0      64     
96     176    
256    288    
-80    160    
192    192    
-240   -144   
-48    -32    
-352   -80    
256    144    
-208   64     
-112   -320   
368    -400   
-240   288    
-208   -160   
192    144    
-32    -160   
-32    208    
-96    -352   
224    -384   
304    432    
304    -192   
-128   112    
128    -528   
-176   48     
224    -48    
-80    112    
64     -16    
80     64     
64     32     
240    736    
-208   16     
128    -128   
-48    32     
-112   -288   
240    -64    
-112   -48    
128    192    
-144   -240   
48     -176   
272    160    
-32    144    
80     -80    
144    496    
-272   -576   
800    400    
-144   1216   
16     -416   
-64    -496   
592    16     
-16    208    
96     352    
176    -256   
96     160    
240    368    
-112   -208   
192    352    
0      -96    
384    592    
-224   -336   
752    304    
-464   304    
288    -848   
144    336    
16     80     
-272   -320   
96     -608   
96     144    
-192   -368   
624    432    
-272   -48    
320    -576   
0      80     
64     -256   
96     64     
-192   -144   
128    208    
16     -288   
288    272    
-304   -176   
96     -336   
-144   -448   
-64    -400   
208    -560   
208    176    
0      464    
128    -432   
224    416    
-96    -304   
-80    16     
-160   256    
96     -48    
-848   16     
144    -160   
48     -128   
-192   -416   
256    -720   
208    -800   
240    304    
-48    -368   
16     128    
16     -80    
-96    -64    
-96    16     
48     -48    
80     64     
-16    48     
-480   -32    
-112   -160   
96     -80    
32     -144   
96     -32    
0      -128   
32     32     
432    -2240  
-368   -256   
224    -224   
-128   80     
64     -80    
64     144    
-192   16     
-16    256    
-496   -32    
-64    -64    
96     -16    
32     64     
-16    16     
-80    -144   
-304   -128   
384    -432   
-16    224    
-80    -144   
-32    160    
160    16     
-96    -160   
-80    -32    
96     -224   
-96    16     
16     -128   
176    -48    
160    -16    
-96    -32    
-16    -240   
-32    240    
96     -624   
-112   48     
208    160    
-32    80     
-112   16     
-16    -144   
0      -80    
-80    0      
160    64     
-64    -32    
-496   -48    
-64    -112   
-1232  112    
-432   -288   
128    96     
-224   -288   
272    -48    
112    -1712  
0      -144   
-48    -64    
16     -128   
-48    112    
96     208    
-144   288    
80     64     
-320   -32    
32     -32    
-144   64     
176    16     
0      64     
112    -176   
80     128    
16     -688   
-16    112    
0      224    
16     96     
-304   64     
192    -112   
-96    -112   
80     -96    
64     16     
160    224    
144    240    
-32    144    
128    224    
176    -48    
-80    96     
256    -496   
64     128    
112    112    
160    128    
-80    144    
-208   368    
32     -352   
-16    -80    
-64    48     
-176   -176   
-288   -240   
208    -384   
-48    192    
336    -160   
-144   48     
32     -64    
-112   -112   
-96    -32    
-352   32     
-400   64     
128    80     
-96    -176   
-48    -112   
128    -80    
-800   -176   
-64    -16    
-368   0      
16     224    
-272   -32    
-400   -320   
-384   -256   
-560   -288   
-208   160    
-112   288    
-256   32     
-624   -384   
-80    -384   
-144   -336   
368    -48    
64     -320   
144    -80    
288    128    
176    48     
-64    -128   
-96    -80    
320    144    
-384   0      
80     -32    
-160   -96    
144    48     
-896   -16    
-176   -64    
-752   -64    
-224   -96    
240    -240   
160    -16    
80     0      
-112   32     
-160   -64    
256    96     
64     96     
16     0      
112    48     
-16    -48    
16     -176   
128    128    
240    160    
352    384    
-528   96     
128    -48    
16     160    
16     -144   
-160   96     
112    80     
-128   80     
144    32     
-128   -48    
80     -176   
-64    -32    
96     144    
16     96     
-16    -32    
128    0      
-192   80     
-240   16     
96     96     
96     0      
32     128    
128    64     
-48    -64    
-64    16     
-160   -32    
-112   0      
-144   -96    
16     -48    
80     224    
64     -128   
-848   -352   
176    112    
-496   -64    
0      64     
-96    -48    
-32    0      
-32    160    
96     208    
96     32     
-96    -48    
-16    -48    
-96    -16    
112    -336   
-288   -496   
-144   -576   
-112   80     
304    288    
-176   80     
-128   112    
112    112    
-64    48     
0      48     
48     0      
0      80     
64     112    
-144   -320   
-160   -400   
176    -64    
64     -96    
-16    -544   
-48    48     
112    576    
-208   -400   
32     -64    
96     32     
-96    16     
-80    -176   
176    -48    
0      272    
-64    -160   
64     208    
144    272    
-208   256    
176    -64    
112    32     
-224   80     
112    176    
-176   -80    
-80    144    
-16    -784   
192    624    
-48    -48    
-16    32     
96     128    
128    -48    
-192   96     
224    -32    
-16    384    
32     128    
-208   -240   
-256   -1168  
112    -640   
-48    496    
96     560    
-32    -48    
32     144    
112    80     
-112   -32    
64     32     
48     48     
96     112    
80     176    
-48    80     
-64    -96    
-32    64     
0      48     
64     112    
-224   -64    
64     -112   
48     96     
32     -64    
-32    -144   
0      32     
80     -32    
96     64     
192    320    
-320   0      
-16    96     
-560   -464   
656    -560   
-208   -128   
496    656    
-128   272    
176    -32    
240    416    
288    496    
-48    80     
-224   -64    
416    160    
-432   -48    
-176   -208   
-272   -304   
192    16     
288    240    
-32    224    
-80    -224   
112    224    
256    -176   
48     80     
672    512    
-400   320    
-160   -304   
-96    -336   
32     -16    
-16    128    
-64    -32    
144    -64    
32     16     
112    224    
176    480    
-208   -128   
112    -272   
-16    -112   
-32    128    
-96    -96    
-96    -256   
128    448    
-32    144    
80     320    
-128   -32    
-144   -272   
176    -336   
96     320    
16     -272   
128    240    
-16    -48    
0      -880   
96     48     
256    272    
-208   -416   
768    592    
-496   336    
368    -16    
-64    0      
288    112    
-400   160    
-64    -416   
160    304    
-128   -96    
224    16     
-96    656    
64     -464   
-64    224    
16     192    
48     272    
-16    80     
-96    112    
208    -112   
256    576    
-368   -112   
160    -160   
16     -64    
144    160    
80     64     
-112   0      
480    256    
-368   -848   
112    -176   
32     -1968  
416    448    
-192   256    
160    240    
-16    0      
-32    128    
80     -80    
-288   192    
96     -112   
48     -80    
16     -128   
-256   -512   
192    -112   
-48    -864   
-112   -128   
80     -128   
-112   -64    
32     496    
64     240    
-48    240    
96     128    
-16    64     
32     288    
-32    -464   
176    16     
112    -96    
-160   160    
16     208    
32     112    
96     128    
-32    -480   
160    416    
-64    -992   
80     176    
144    0      
0      128    
96     32     
-80    64     
-96    -128   
160    -176   
-16    -256   
96     -336   
-144   48     
288    -144   
96     0      
-32    -944   
64     -80    
64     0      
80     0      
-16    -128   
112    128    
-64    96     
48     176    
48     0      
-16    -128   
384    112    
0      80     
160    160    
-112   -80    
32     -96    
144    -160   
192    208    
-208   -80    
144    96     
-48    112    
128    144    
64     0      
80     0      
160    0      
-48    -64    
32     96     
112    16     
208    80     
-128   -80    
208    96     
0      -32    
48     96     
160    -96    
-48    48     
96     -128   
-64    80     
16     96     
64     96     
-16    80     
96     -144   
32     144    
80     -224   
16     96     
192    -96    
0      48     
80     -16    
-96    48     
160    -288   
16     112    
48     48     
0      -80    
64     96     
64     -1040  
80     -656   
128    -16    
-48    -48    
32     -192   
128    144    
0      -112   
64     128    
-32    -208   
96     16     
-16    -416   
-64    -688   
96     304    
192    400    
-176   16     
0      -192   
112    -736   
-112   -96    
32     -256   
144    64     
32     -240   
96     112    
0      -176   
192    64     
160    -128   
-96    -64    
112    -176   
96     64     
-16    -224   
0      32     
-352   -48    
16     -160   
-384   -160   
192    -16    
-128   -176   
208    -208   
-16    -112   
96     -704   
32     48     
288    288    
-224   224    
112    32     
-128   16     
80     -272   
-208   112    
144    -96    
-192   -32    
-704   0      
32     -160   
64     -16    
16     -112   
64     16     
-48    -64    
-128   -16    
608    -1584  
-224   112    
384    -192   
-80    -48    
240    -48    
96     96     
-128   144    
16     -128   
-192   -112   
48     -48    
-528   -80    
112    -48    
48     96     
48     -128   
-224   -16    
48     -688   
-48    32     
144    80     
-272   -272   
560    128    
-192   -128   
176    -96    
48     -144   
48     -96    
-64    -128   
96     96     
-80    -304   
208    -16    
-128   -320   
-48    -224   
0      -224   
-112   32     
64     176    
-160   64     
-64    -16    
16     96     
-144   -16    
-112   32     
96     0      
32     192    
-16    16     
32     -16    
-32    -80    
32     -128   
0      96     
128    128    
80     -16    
-48    -192   
128    -96    
112    32     
-96    -32    
48     96     
-112   64     
-192   48     
0      -96    
-208   96     
192    -64    
176    48     
48     -144   
64     80     
176    -288   
-144   80     
-64    -1152  
96     -96    
-144   -80    
112    -272   
-256   -80    
96     -96    
-320   -160   
64     48     
-16    -48    
-64    0      
-224   32     
96     -208   
-16    -32    
160    -352   
-80    144    
224    640    
224    -64    
-64    192    
-128   -448   
-96    -352   
48     400    
-112   -112   
48     32     
368    560    
-288   -368   
-240   -320   
-160   -176   
80     304    
-1296  80     
96     -528   
-112   480    
-464   80     
-240   -80    
240    -32    
-224   -96    
368    128    
-144   64     
144    48     
64     32     
-448   -80    
16     96     
-304   -64    
80     -16    
-240   -400   
-288   160    
-160   -176   
16     -96    
-48    608    
-496   -144   
-48    32     
-752   160    
-240   -128   
96     -608   
-144   -80    
-320   -224   
48     64     
-192   -368   
-32    0      
-64    -368   
-112   64     
32     -48    
-16    112    
-64    -16    
208    -144   
-48    112    
96     -32    
-176   32     
32     32     
-112   32     
-48    -16    
80     48     
-352   -288   
208    -304   
-32    176    
-96    96     
-64    -288   
-128   -608   
128    -128   
-192   -288   
64     -256   
-128   -112   
80     160    
-704   144    
128    32     
-64    -80    
0      112    
-96    -112   
32     80     
-96    96     
240    32     
-144   96     
0      -64    
32     96     
-128   32     
48     16     
0      176    
80     368    
-304   16     
240    80     
-688   16     
160    176    
-64    0      
112    176    
-144   16     
208    96     
-208   768    
416    32     
-208   -320   
-80    80     
-240   -192   
144    -208   
-96    -352   
-224   -176   
224    -128   
-384   352    
736    768    
-256   368    
208    -304   
-48    -256   
32     192    
96     -32    
144    112    
96     656    
480    448    
-528   -528   
-112   -832   
352    288    
-352   704    
208    -224   
-160   64     
208    368    
-112   -16    
-352   -144   
0      -80    
-208   -304   
-192   -352   
-80    -880   
320    176    
-304   368    
32     16     
48     160    
-128   352    
-592   -528   
16     464    
-336   288    
0      -176   
-16    192    
-320   -1104  
-144   -352   
192    144    
32     272    
48     -224   
-80    -448   
-96    -272   
144    208    
-112   224    
512    416    
176    128    
112    128    
-112   64     
96     -448   
-112   -160   
304    128    
-128   96     
-192   32     
-144   -160   
-192   48     
192    0      
-160   0      
80     80     
-176   -48    
64     80     
-64    208    
112    208    
-128   -16    
144    144    
-32    144    
112    624    
32     192    
-64    16     
160    64     
256    208    
-240   160    
-160   0      
144    32     
-176   -48    
304    176    
-144   144    
16     96     
-32    80     
192    128    
-128   -32    
32     32     
272    192    
-256   48     
416    336    
16     160    
64     -96    
96     80     
128    16     
-80    -208   
48     0      
-16    80     
-16    272    
64     176    
-112   80     
-32    64     
32     112    
32     64     
-64    64     
128    96     
80     48     
-80    32     
0      48     
64     96     
-112   -144   
256    80     
-32    32     
64     32     
-16    64     
-64    48     
64     80     
144    256    
-160   -16    
16     96     
192    256    
-352   96     
192    32     
-176   32     
256    224    
-16    96     
0      112    
-112   0      
64     112    
96     64     
16     16     
0      64     
112    160    
-96    -16    
80     48     
16     96     
96     144    
-48    80     
-32    -16    
144    -48    
176    240    
-192   32     
64     112    
96     96     
144    128    
48     64     
-80    -144   
32     -224   
144    0      
48     48     
-32    80     
144    32     
128    48     
-48    80     
112    112    
-64    0      
160    -16    
48     128    
-64    -512   
160    80     
-16    48     
16     16     
-64    -16    
160    96     
0      128    
-48    112    
0      -16    
144    80     
-80    -128   
-80    -144   
128    -192   
-64    80     
288    80     
-64    -400   
176    64     
-32    -1232  
160    96     
-16    -32    
48     32     
-80    96     
304    80     
-144   16     
176    32     
64     144    
128    160    
48     208    
80     0      
0      -64    
-48    -544   
16     64     
32     -384   
80     48     
128    64     
-16    -48    
16     -368   
128    48     
112    48     
48     80     
64     192    
-16    0      
-64    48     
208    -240   
-64    128    
112    -16    
0      144    
176    -16    
-16    64     
32     -928   
-80    32     
128    -32    
80     48     
-64    112    
32     64     
-80    16     
16     -128   
16     128    
-112   -176   
144    80     
144    -80    
-240   -304   
208    -240   
-16    288    
128    -352   
-48    128    
96     128    
-16    64     
32     128    
160    160    
-160   16     
48     64     
304    576    
144    64     
-48    -16    
-64    -544   
112    -16    
16     -416   
16     -64    
112    -32    
160    192    
-48    128    
80     64     
32     96     
64     160    
-112   32     
32     -288   
272    336    
-272   -176   
288    192    
80     -352   
-96    -128   
352    -32    
-64    112    
96     -1248  
128    112    
336    112    
-320   208    
192    48     
-416   96     
512    160    
-384   16     
96     336    
16     -96    
496    496    
-272   384    
-144   144    
32     -144   
-32    -64    
208    -304   
80     496    
160    0      
-160   -1168  
128    96     
-288   -64    
144    -80    
128    -16    
-48    -720   
32     -48    
144    192    
-112   64     
96     112    
-32    0      
240    128    
-64    -96    
224    -128   
-32    160    
80     240    
-128   -32    
-336   -144   
48     -544   
-128   -416   
96     -384   
16     -240   
0      -96    
256    -32    
16     -1824  
192    -480   
0      -192   
-16    48     
208    16     
-64    48     
208    -416   
16     304    
-288   -112   
64     16     
144    -96    
64     144    
208    -208   
-80    -288   
352    -80    
-64    -64    
192    -208   
80     -32    
96     144    
48     -64    
224    80     
-176   -272   
240    80     
-208   192    
144    -16    
-800   -48    
128    -16    
96     16     
96     -96    
32     -64    
-16    -80    
96     80     
144    -1328  
-64    16     
128    -48    
-16    64     
-16    48     
64     -48    
-32    32     
64     -16    
-352   -160   
304    -416   
-144   -48    
-16    -144   
112    -208   
96     -80    
-64    -80    
96     -1552  
128    96     
32     80     
-96    48     
112    -160   
176    16     
-16    -32    
48     -304   
-64    64     
256    96     
-704   128    
208    -48    
-16    16     
32     -144   
160    176    
48     -256   
-32    32     
288    144    
-160   0      
48     80     
-32    -144   
112    32     
16     -48    
0      16     
304    112    
-176   -16    
160    -176   
-1360  -688   
384    -368   
-112   16     
48     -480   
-160   -160   
160    -176   
-48    -48    
-144   144    
-32    -80    
-128   48     
96     -48    
-208   96     
112    -112   
-144   32     
192    -192   
-192   0      
128    -144   
0      112    
16     -608   
128    288    
112    128    
112    656    
112    368    
16     16     
96     208    
-128   -112   
-192   128    
-32    -80    
112    -16    
528    480    
-1024  -512   
48     -1184  
288    640    
0      400    
-80    -352   
48     176    
0      128    
-160   0      
80     -80    
-240   -432   
-32    -32    
32     288    
48     -64    
48     80     
160    160    
-48    416    
-1392  -720   
336    -176   
-320   176    
-464   -128   
112    112    
-656   -128   
-48    -208   
-480   -128   
32     -48    
64     80     
-96    16     
-64    32     
-112   16     
-1232  -144   
288    272    
-800   -336   
144    -224   
-384   -208   
16     0      
-208   -336   
-224   -160   
-16    -48    
-64    0      
-224   -48    
-544   0      
-144   -176   
480    -256   
-304   80     
240    -112   
-176   32     
96     0      
-128   128    
672    368    
-656   144    
304    384    
-624   -160   
128    32     
-16    96     
-32    64     
-896   -224   
336    16     
-704   112    
64     -128   
-320   -144   
624    32     
-256   16     
336    16     
-64    96     
64     32     
-112   64     
80     32     
-80    16     
-304   -192   
96     -16    
-576   -224   
-112   -64    
464    112    
-368   16     
0      -48    
-80    -48    
240    -256   
-96    96     
96     112    
32     80     
192    256    
-432   16     
160    64     
-128   48     
48     -16    
-160   32     
96     -112   
-352   -64    
80     64     
-336   -96    
208    208    
-96    -80    
32     16     
176    128    
-112   48     
-48    -32    
-32    -80    
-16    64     
-16    192    
-16    32     
-64    16     
128    48     
-368   -160   
144    48     
-1056  0      
96     64     
32     64     
32     -48    
-48    64     
112    32     
-240   -112   
-32    48     
0      0      
-32    32     
32     128    
128    16     
-192   -112   
-240   -272   
240    224    
-624   16     
208    112    
-112   16     
112    160    
0      144    
-112   64     
-32    -288   
96     0      
272    192    
-160   64     
16     -16    
-64    -48    
160    112    
-176   96     
-32    112    
192    240    
-560   176    
128    112    
-160   80     
304    80     
-352   -160   
272    32     
0      -16    
-80    80     
16     128    
-208   48     
160    192    
-160   112    
-144   64     
48     32     
-128   -192   
-128   0      
16     96     
-48    96     
-80    -96    
0      -32    
32     -16    
80     80     
32     80     
-64    -32    
16     112    
-112   -48    
64     96     
-144   -32    
-128   48     
64     112    
96     112    
-80    16     
48     48     
32     48     
160    -48    
-16    112    
-32    0      
-32    128    
64     -80    
-16    0      
-64    -32    
0      32     
-96    32     
240    176    
-176   0      
-16    208    
112    64     
0      64     
16     48     
16     32     
64     -48    
-128   48     
112    -80    
-32    80     
-112   112    
-144   -16    
160    96     
-96    16     
48     112    
-64    144    
80     -32    
0      80     
64     -32    
192    16     
-144   -32    
192    80     
-80    48     
48     32     
-32    0      
48     -48    
208    48     
80     32     
96     96     
-128   16     
192    96     
-16    64     
80     48     
64     16     
96     112    
-16    48     
240    160    
48     80     
48     48     
0      128    
64     16     
-112   80     
128    112    
-80    32     
48     16     
0      192    
144    -80    
-48    96     
80     -32    
256    96     
-416   -688   
0      -496   
80     -96    
32     -256   
-128   -32    
336    480    
-32    224    
-224   160    
256    0      
-144   -832   
240    -80    
-112   64     
208    144    
-144   64     
112    48     
-96    64     
-32    128    
208    192    
144    432    
80     -160   
-176   -464   
-112   -160   
176    -160   
-256   224    
224    80     
-336   144    
-16    0      
-224   16     
112    -48    
96     48     
464    416    
-256   448    
-96    192    
48     160    
272    48     
-128   -48    
400    -16    
48     -160   
-160   -432   
-80    -416   
112    144    
-144   80     
144    288    
32     96     
-96    16     
112    144    
-48    -128   
160    80     
-224   -16    
48     -112   
32     240    
16     -144   
96     -192   
0      208    
64     -720   
160    512    
-32    -240   
144    112    
112    160    
16     48     
0      -128   
48     64     
-32    32     
64     96     
112    128    
-160   176    
144    -160   
208    368    
352    656    
-384   -336   
48     -496   
16     -720   
112    400    
112    -2416  
-16    224    
224    320    
64     160    
-48    96     
160    -16    
-176   -80    
112    -64    
-48    176    
80     -64    
64     32     
16     48     
16     80     
32     -160   
0      128    
32     -80    
256    -64    
80     240    
16     496    
16     128    
144    176    
-176   48     
320    -352   
-64    144    
-32    -224   
144    128    
32     -288   
0      112    
-16    -320   
96     96     
16     -32    
0      96     
48     208    
240    288    
-64    160    
176    480    
176    288    
-144   -48    
128    16     
-16    -256   
96     16     
32     -176   
240    368    
16     -304   
0      32     
160    -112   
48     160    
16     160    
16     48     
-16    16     
128    -48    
48     192    
64     -48    
96     -80    
32     -128   
0      -176   
288    16     
272    704    
64     272    
176    96     
80     64     
16     -400   
-64    -256   
16     -560   
96     -128   
-1200  -352   
416    -32    
-144   -48    
480    -1104  
-112   304    
112    -1104  
16     -128   
176    208    
32     -320   
-64    144    
176    -64    
112    -48    
208    672    
64     192    
-160   -176   
-720   -144   
-144   16     
224    -32    
448    608    
-224   624    
-160   -1184  
288    272    
80     160    
16     -560   
80     -192   
-96    -64    
96     80     
16     -160   
144    -240   
304    -48    
-336   384    
32     -48    
288    -512   
80     96     
96     112    
288    -144   
-240   -16    
0      -784   
-32    -192   
112    80     
-112   48     
-112   -336   
128    -288   
-80    -32    
176    -112   
-128   -48    
-48    -48    
-304   -48    
48     -352   
112    -208   
16     -352   
304    -128   
-16    -16    
160    80     
-48    -48    
0      -192   
32     -240   
112    112    
-80    224    
-304   -112   
432    480    
-272   608    
-448   144    
-320   -320   
-160   -208   
176    64     
-288   64     
96     -240   
-256   -64    
320    -1152  
-304   48     
176    -16    
-80    -64    
176    112    
-112   -48    
-32    0      
192    0      
-288   -16    
48     -128   
-48    288    
-208   48     
-112   -160   
-16    -304   
128    32     
0      -320   
16     176    
48     0      
304    448    
-560   -224   
80     112    
-160   0      
-32    -32    
-224   -80    
80     -64    
-512   -144   
-64    -224   
32     -16    
-48    -112   
144    240    
-160   -176   
176    80     
-96    -1696  
272    48     
-384   48     
32     -16    
-352   48     
144    240    
-144   160    
-64    16     
-272   144    
112    -112   
-96    -32    
16     -48    
224    112    
128    -128   
-48    32     
-64    -16    
-64    -64    
-96    -64    
176    80     
-112   16     
112    -96    
-64    48     
96     -96    
-80    48     
96     64     
-496   176    
176    0      
-48    0      
-384   -272   
128    48     
-96    -48    
176    -32    
112    48     
112    -64    
-64    0      
80     -96    
-192   16     
160    16     
-288   -32    
304    48     
-240   -32    
-256   -320   
128    96     
-752   -128   
-96    80     
-64    -48    
-64    64     
-32    128    
-1152  -96    
96     0      
96     240    
96     48     
-80    -112   
-64    -112   
-352   -64    
192    144    
-240   64     
64     144    
16     112    
80     368    
80     0      
-464   -160   
192    128    
192    208    
-256   160    
-160   32     
-208   16     
80     -80    
0      96     
-16    -112   
-224   -16    
272    0      
96     48     
64     64     
-144   32     
96     160    
-32    48     
-112   0      
32     80     
48     48     
-960   -64    
-128   32     
80     -144   
-96    0      
48     -32    
-80    -32    
-32    -96    
64     0      
0      -96    
-80    48     
-32    -16    
-16    112    
32     64     
-96    64     
0      96     
-32    96     
16     16     
-432   -64    
48     96     
64     112    
144    208    
-288   -176   
-80    -64    
-96    16     
144    -16    
-160   80     
112    -48    
-144   0      
144    64     
-144   64     
240    96     
-48    96     
-368   -64    
32     96     
-128   160    
176    160    
-32    -240   
32     -48    
-208   112    
-80    -48    
112    -48    
-240   0      
16     16     
-208   -160   
48     -128   
224    112    
-304   240    
-128   -32    
-32    80     
-2016  -192   
304    48     
-32    -320   
96     -432   
-160   -80    
192    -48    
-144   -192   
208    208    
-240   -32    
384    224    
-272   224    
-176   -160   
0      160    
-16    -80    
32     176    
-704   -32    
144    -96    
-48    48     
-32    128    
-128   16     
-384   -624   
-128   -288   
160    128    
0      32     
-16    -32    
-64    16     
-96    -80    
128    208    
-80    176    
320    16     
-80    192    
320    448    
-176   64     
192    -32    
256    224    
-224   -320   
16     -400   
-240   -240   
128    48     
96     80     
32     80     
-64    96     
64     176    
-32    192    
-16    160    
128    448    
0      576    
112    256    
-160   144    
-144   -576   
-64    -320   
0      160    
144    400    
32     48     
-144   80     
176    352    
80     112    
-176   192    
-144   16     
-64    -96    
112    -160   
-96    192    
256    256    
-224   -112   
16     128    
0      32     
-32    384    
192    336    
-112   -336   
128    128    
48     16     
-64    96     
32     144    
-160   -416   
96     48     
304    448    
-112   224    
-176   -352   
48     -480   
16     112    
128    -128   
144    464    
64     256    
208    -80    
-128   112    
288    64     
-240   -96    
-16    32     
96     32     
128    128    
-32    80     
128    48     
-64    48     
16     144    
-64    -96    
112    16     
-96    512    
0      -32    
128    256    
128    608    
-16    -112   
-224   -176   
-48    -544   
144    64     
80     176    
16     0      
32     240    
-32    80     
-32    -32    
128    320    
-32    240    
48     16     
-112   64     
32     48     
-32    0      
144    48     
16     16     
80     192    
112    432    
16     320    
128    400    
-16    256    
-16    -112   
176    -48    
0      112    
224    48     
-160   48     
0      32     
80     80     
0      80     
80     96     
-80    -224   
16     -704   
48     64     
-16    -1456  
240    0      
-224   -144   
288    128    
-288   -384   
160    -480   
-32    -176   
-32    -208   
160    -32    
16     112    
16     160    
160    -112   
-32    192    
96     16     
0      0      
80     -96    
288    400    
-144   608    
-176   -224   
208    -512   
-48    720    
288    -96    
-240   0      
96     176    
272    -176   
-256   192    
224    -16    
80     256    
-80    -64    
-80    -208   
272    400    
-16    160    
80     160    
144    240    
-320   -320   
96     272    
144    0      
-64    -16    
32     16     
32     80     
-32    128    
0      -48    
112    -176   
192    -64    
64     272    
-240   -784   
144    -672   
-64    -592   
160    272    
16     352    
32     160    
112    -240   
256    528    
-32    448    
0      352    
128    192    
112    192    
64     48     
16     -128   
-144   -16    
96     48     
80     160    
64     -112   
272    448    
-304   -1056  
-96    144    
-32    -192   
0      -64    
32     -96    
32     16     
64     -16    
80     0      
-64    208    
192    16     
-208   -16    
112    -160   
-48    160    
-144   -592   
-16    -64    
96     -96    
-128   -256   
0      -208   
176    96     
-64    176    
-144   -96    
400    128    
-288   112    
304    16     
-64    -208   
144    96     
80     -96    
-96    48     
224    -272   
-32    112    
-32    -272   
640    224    
16     192    
144    64     
-336   80     
176    -48    
-128   -144   
144    96     
48     176    
-96    -224   
32     96     
48     -16    
48     48     
32     176    
-48    256    
112    112    
80     112    
-32    -112   
-128   96     
96     80     
-80    -112   
-80    80     
128    -96    
-64    384    
272    -288   
0      48     
272    -48    
0      128    
-96    80     
112    224    
-128   -144   
48     -416   
-192   -32    
48     -528   
-112   32     
-1424  96     
0      -208   
-96    -416   
0      -1008  
-80    0      
0      -144   
-128   -304   
64     16     
48     -208   
16     -368   
64     96     
32     -128   
-160   -112   
224    -368   
112    -336   
-896   304    
0      -448   
-272   -80    
64     -400   
96     48     
-64    -96    
-80    32     
80     -352   
48     16     
-64    -80    
-80    32     
80     32     
-48    80     
64     -80    
32     -112   
-608   -128   
224    64     
-16    80     
112    48     
0      -112   
64     -272   
96     -176   
-112   -1360  
240    -64    
48     -48    
0      48     
0      -80    
0      64     
-48    0      
176    48     
-272   32     
304    -16    
-928   16     
224    -16    
48     0      
160    -368   
48     128    
96     176    
-64    -64    
336    32     
-128   -64    
176    -144   
-112   128    
176    -16    
-112   0      
96     0      
0      -192   
-144   -64    
160    -208   
-16    368    
-288   272    
32     80     
96     -112   
112    48     
-16    -1856  
-224   -160   
304    -64    
16     96     
32     48     
-64    -16    
0      48     
64     -48    
-368   64     
16     -112   
-640   -48    
144    -32    
-48    32     
48     -336   
64     48     
144    -352   
0      128    
128    48     
32     32     
-144   -16    
64     16     
-160   -48    
16     16     
-80    80     
0      -16    
-48    -176   
240    -192   
0      0      
64     -160   
32     64     
-64    -320   
144    0      
-16    96     
48     112    
48     0      
80     -48    
-240   96     
192    160    
400    368    
-208   176    
-16    416    
0      -80    
176    192    
-96    -192   
-64    48     
80     -192   
0      144    
-112   80     
80     80     
-16    128    
-48    -160   
-96    0      
0      144    
-80    -32    
48     -80    
160    0      
0      688    
192    288    
-16    -416   
96     48     
-1072  -464   
-64    -80    
224    192    
-64    -32    
320    -368   
16     336    
-192   -544   
224    160    
128    496    
-16    -352   
-112   -176   
144    -32    
96     416    
-256   -192   
144    -48    
112    368    
-224   96     
0      -160   
-336   32     
16     32     
-720   -208   
336    -32    
96     80     
-128   64     
192    -64    
96     640    
-224   64     
16     -32    
-32    -32    
-96    -80    
96     -96    
-96    64     
176    224    
-512   0      
16     304    
-48    176    
-112   -128   
-1008  -112   
16     48     
192    -384   
80     -32    
-320   -160   
128    192    
-448   -496   
160    -528   
208    624    
-80    384    
-160   -192   
32     176    
-32    32     
-112   128    
-96    368    
-128   -272   
-240   240    
48     -64    
208    1104   
-240   -848   
160    -272   
0      112    
-272   208    
16     -160   
-208   -416   
112    416    
-144   -208   
-112   -560   
240    496    
-160   144    
-128   -448   
-320   192    
-1072  -32    
-48    64     
-320   -256   
448    96     
-208   -384   
272    -32    
-208   80     
-64    -240   
224    272    
-144   496    
-96    -416   
192    -16    
-400   224    
112    -32    
64     96     
-528   -736   
64     688    
-64    48     
-64    -352   
-16    608    
144    176    
-96    64     
-112   96     
0      -32    
16     80     
16     80     
-96    16     
64     64     
-48    48     
-16    32     
-320   128    
128    -336   
-544   -112   
-208   192    
-32    -288   
-32    -144   
-96    192    
0      -160   
-32    160    
16     48     
48     224    
48     -64    
128    -96    
-352   240    
96     -64    
-304   -688   
128    64     
-944   256    
64     -304   
16     320    
-48    32     
256    368    
-576   256    
64     -416   
-176   -720   
-112   320    
224    128    
-128   416    
-176   64     
160    112    
-176   144    
-48    -96    
-16    48     
128    96     
-144   64     
16     32     
48     64     
48     32     
16     64     
64     96     
-208   -144   
80     -272   
-192   176    
208    336    
32     288    
64     288    
-112   -112   
176    272    
-128   -112   
144    112    
-64    -144   
64     -176   
144    224    
16     112    
-96    -96    
0      48     
-352   -800   
16     -32    
-16    16     
16     272    
32     208    
96     208    
0      -32    
0      -128   
-16    -176   
48     96     
96     176    
-32    -16    
32     96     
176    160    
-128   96     
80     64     
496    544    
-288   336    
496    704    
-544   128    
32     224    
48     -80    
128    -16    
96     0      
-64    -112   
160    64     
48     -48    
-16    64     
144    192    
-32    48     
-48    -48    
112    112    
80     176    
-144   192    
16     64     
80     96     
224    192    
-256   48     
16     144    
-240   -272   
272    -160   
0      -16    
-32    80     
32     112    
48     64     
-192   -304   
432    -320   
-240   112    
448    400    
-400   112    
96     16     
-96    144    
80     48     
80     96     
160    144    
0      176    
160    384    
-160   -16    
48     16     
32     96     
128    64     
32     224    
-240   0      
64     304    
80     192    
-176   112    
128    224    
-32    64     
96     16     
144    288    
96     112    
-112   32     
-160   -48    
-16    -112   
48     16     
64     16     
0      112    
32     16     
16     -240   
384    704    
-48    -928   
-416   -432   
96     -80    
-256   48     
0      32     
0      -128   
-32    112    
-32    48     
128    -112   
96     160    
-64    96     
208    352    
0      48     
-64    -208   
-64    -48    
96     -768   
-16    -80    
128    224    
320    368    
-224   208    
-80    -16    
-160   80     
-208   0      
192    -32    
-48    240    
0      64     
16     272    
48     32     
0      -208   
320    352    
240    -336   
32     160    
-144   160    
80     16     
64     -32    
64     -96    
-16    -192   
224    32     
80     96     
128    -112   
-96    48     
-192   -96    
-160   32     
208    0      
-160   -48    
96     -112   
32     128    
-16    -352   
0      64     
192    -112   
-80    96     
32     -96    
96     112    
-112   112    
288    240    
-256   32     
224    16     
16     208    
192    -128   
-64    48     
192    -48    
48     112    
-16    -144   
192    160    
-32    -240   
-176   64     
80     -64    
96     64     
144    224    
128    128    
-176   -80    
208    -112   
144    64     
-80    -96    
144    208    
-16    -80    
32     80     
48     -160   
128    176    
-96    128    
32     96     
160    80     
144    144    
64     0      
64     112    
-32    112    
80     48     
0      -32    
192    -48    
-16    208    
160    -64    
-80    16     
176    -224   
48     96     
32     -432   
160    176    
-80    96     
128    128    
32     80     
-32    -224   
288    176    
-144   32     
192    48     
-32    -160   
32     -96    
-64    -544   
176    -112   
80     112    
0      48     
80     -240   
-64    192    
-144   -288   
128    -1008  
128    -240   
-32    112    
16     -704   
96     -160   
208    -64    
-16    -64    
112    -32    
-48    -96    
48     48     
48     -32    
64     560    
64     144    
-48    -1952  
96     -240   
-48    -32    
128    -352   
80     656    
80     -288   
-48    -480   
112    -208   
-16    -192   
32     -176   
144    -528   
128    80     
32     -192   
16     -304   
0      -32    
96     -176   
-176   128    
176    80     
64     48     
-1216  -176   
64     -240   
-48    -352   
288    -48    
32     304    
48     -336   
176    -32    
-64    -1024  
80     -160   
96     -48    
48     64     
0      16     
80     -144   
-16    144    
-48    80     
-496   -784   
240    288    
-144   288    
96     -128   
-32    -144   
128    -512   
96     0      
112    -992   
-96    -320   
160    -32    
160    448    
16     80     
32     -16    
64     -256   
48     -240   
-32    32     
144    -288   
-160   48     
624    240    
-80    368    
16     -224   
-64    -400   
288    176    
-32    240    
-144   -528   
-112   -80    
240    -192   
128    80     
-160   32     
144    656    
-16    48     
-224   -592   
-672   -480   
96     32     
0      -16    
-112   0      
112    144    
-144   -368   
0      16     
48     -400   
192    176    
-352   176    
-16    -64    
-176   144    
-96    -208   
32     -64    
-96    256    
-32    -64    
-320   -608   
-144   720    
224    560    
-80    96     
-16    -1056  
144    -112   
320    -144   
-48    400    
-32    -400   
128    48     
304    496    
256    848    
-624   -192   
96     -80    
-64    -144   
240    576    
-560   160    
384    16     
-256   0      
-144   -1200  
256    784    
-64    -144   
160    -160   
-208   128    
-48    -240   
-512   144    
240    -128   
-528   -384   
-16    -320   
-80    400    
192    96     
-560   -112   
160    -368   
-16    0      
16     48     
-64    -256   
320    -112   
-96    -192   
0      80     
16     112    
0      -144   
16     96     
-80    112    
80     -96    
-160   128    
32     -304   
-416   -80    
192    -336   
-80    128    
160    -96    
-160   144    
-400   -64    
-592   448    
-64    128    
-112   -144   
96     416    
160    -176   
-160   -64    
64     -16    
-192   304    
48     -368   
-16    224    
-128   0      
-64    -224   
176    224    
-144   80     
240    160    
-368   -80    
-16    -80    
-400   -80    
80     432    
-1008  32     
0      -32    
128    -96    
-96    -64    
64     144    
32     448    
-656   -640   
-32    128    
-16    -64    
-48    96     
336    480    
-368   -144   
80     32     
64     80     
-192   -48    
-144   0      
-16    144    
-688   -16    
240    112    
-352   -96    
-48    48     
-208   -112   
112    80     
-176   -112   
80     16     
16     -112   
-208   -288   
16     -48    
-288   -496   
0      -240   
-16    -48    
80     160    
-432   -48    
48     16     
-240   16     
16     80     
-48    -32    
0      -48    
48     -240   
-48    0      
-64    48     
-80    -16    
32     144    
-256   -32    
-16    96     
-48    -128   
-240   -48    
-512   -192   
-80    0      
-1200  -256   
32     144    
-16    -80    
-64    80     
144    48     
-144   96     
32     64     
-112   96     
112    64     
16     80     
-128   304    
208    160    
-176   0      
-16    -32    
160    160    
-272   48     
96     144    
-64    -80    
192    -16    
-256   96     
224    -32    
-16    112    
32     32     
-80    32     
-64    -32    
80     32     
-128   0      
112    -80    
80     224    
32     432    
192    -32    
-144   -240   
96     -112   
-256   32     
240    192    
-160   48     
128    0      
-208   -112   
192    160    
-368   64     
128    128    
-208   256    
-112   112    
-272   -144   
96     96     
-384   -224   
224    224    
-240   336    
144    240    
16     176    
0      208    
112    224    
-32    0      
0      -96    
96     -32    
176    -112   
0      -80    
176    80     
-144   16     
-16    -192   
-176   -288   
272    -64    
64     80     
-96    16     
-32    -16    
-192   -48    
-16    32     
64     144    
144    144    
-32    32     
-352   -544   
336    -32    
-144   48     
-192   -304   
-64    -208   
-160   -160   
160    96     
112    368    
-96    64     
16     32     
-112   64     
-32    64     
32     80     
112    32     
0      64     
16     32     
-208   -112   
96     -176   
-80    -64    
352    -16    
-208   80     
-96    64     
112    128    
-64    16     
48     256    
32     -16    
-96    64     
352    16     
-160   48     
448    144    
-352   64     
224    32     
16     128    
80     -16    
48     96     
-32    -112   
-32    112    
128    112    
-144   112    
48     32     
-48    -128   
160    128    
32     64     
16     96     
16     64     
-96    -112   
96     16     
144    144    
-256   -32    
112    176    
-208   80     
224    96     
-96    112    
32     144    
80     64     
16     128    
144    48     
128    192    
-96    192    
64     96     
64     32     
-32    32     
176    144    
-256   16     
-16    -80    
16     -112   
16     -64    
16     48     
96     160    
80     0      
-48    -96    
192    64     
160    96     
64     80     
-144   96     
48     -160   
-96    -304   
128    32     
80     208    
-16    -288   
160    256    
-160   16     
-64    -496   
-32    80     
256    96     
48     -112   
-48    -240   
0      -336   
192    144    
-304   -240   
112    -48    
16     80     
0      0      
-112   -96    
48     -128   
32     80     
32     -464   
32     96     
96     128    
-16    48     
32     32     
16     80     
32     80     
16     96     
-112   -400   
128    -160   
-96    208    
-112   -288   
176    528    
0      -528   
-64    144    
160    -784   
0      512    
-96    -272   
128    144    
48     -144   
-48    224    
272    0      
-160   -80    
176    176    
16     112    
-16    80     
48     -48    
128    16     
80     128    
64     -32    
-80    -240   
144    208    
-96    208    
32     304    
-64    -48    
-112   0      
64     112    
48     112    
-80    -96    
112    112    
64     288    
0      16     
-48    -16    
208    80     
-112   320    
64     0      
32     176    
-48    -400   
32     64     
-16    48     
80     48     
-176   -96    
192    144    
-64    32     
128    96     
-80    0      
96     0      
16     80     
80     -128   
16     64     
0      -176   
48     64     
240    -608   
160    432    
0      -352   
-16    -144   
112    -128   
96     176    
48     48     
-48    0      
-80    -32    
-80    -432   
32     -192   
-96    -656   
176    -240   
64     -160   
192    176    
128    -272   
32     512    
656    176    
-304   160    
-48    -96    
352    -416   
96     352    
112    240    
-128   -192   
256    -704   
-80    96     
-272   -176   
240    -512   
368    -304   
-192   304    
-208   -960   
432    576    
-112   -16    
176    16     
80     576    
-192   80     
16     -368   
-64    64     
-80    -144   
-240   -192   
240    272    
80     64     
32     -96    
0      -336   
592    416    
-336   96     
160    -320   
368    512    
-112   320    
320    176    
-384   -496   
32     -2432  
176    240    
-112   -96    
160    -128   
-128   -2240  
144    128    
-48    128    
16     -176   
0      16     
160    -160   
-48    -624   
384    32     
-32    16     
224    96     
-32    144    
192    160    
-592   -1056  
848    -176   
-464   272    
-96    -688   
288    -816   
272    -1360  
240    160    
96     496    
-16    -432   
240    -304   
0      176    
352    96     
-160   176    
240    -400   
80     -480   
-544   -464   
48     -32    
32     16     
-64    -144   
80     -32    
144    -64    
-48    -208   
-112   192    
32     -272   
192    -112   
-32    -16    
32     -32    
128    -16    
-320   -48    
192    -112   
-144   -192   
176    -256   
-176   -192   
48     -48    
96     -224   
96     -624   
32     -48    
0      -496   
-112   -80    
16     -16    
-176   -80    
272    -128   
-48    96     
0      16     
32     0      
112    144    
-32    96     
-848   -16    
16     -304   
32     -96    
80     -368   
176    64     
304    48     
0      96     
48     -80    
-240   80     
224    -80    
16     -48    
-192   -32    
80     -80    
0      16     
32     0      
-1056  -80    
-112   -304   
96     16     
-112   -224   
176    -352   
48     -304   
144    -112   
96     -1104  
0      -80    
32     160    
256    240    
-304   160    
240    -128   
-160   48     
192    -32    
-32    304    
96     0      
-496   112    
368    -144   
128    128    
144    -112   
-16    -112   
176    -544   
128    128    
16     16     
80     -80    
-64    16     
80     32     
-736   -96    
208    48     
-336   32     
160    0      
-96    -32    
128    -208   
-80    -48    
192    -320   
-16    64     
32     -592   
80     -128   
16     -32    
0      -96    
-176   -64    
64     0      
-48    -16    
128    64     
-80    48     
144    -16    
-272   -96    
240    -176   
16     32     
-176   0      
288    -48    
-32    -208   
160    -48    
-64    -16    
-160   48     
432    208    
-96    64     
16     0      
144    -16    
-16    48     
64     -96    
-80    32     
64     16     
64     128    
-96    48     
64     128    
-1184  -288   
-1376  64     
32     368    
224    160    
48     64     
48     -64    
-144   -16    
64     -176   
-80    -16    
272    0      
-336   160    
-80    32     
-160   32     
-288   -320   
64     96     
-112   -48    
-304   -112   
16     -48    
32     -32    
-96    16     
-992   -64    
32     32     
64     160    
48     -96    
-160   128    
128    112    
-336   -112   
96     64     
96     160    
-528   112    
80     -64    
-256   -240   
368    80     
-176   128    
-64    -80    
-96    112    
96     96     
-688   32     
224    128    
-240   -16    
80     80     
-192   -128   
96     64     
432    272    
-128   48     
192    -32    
-176   64     
16     -160   
208    272    
-32    112    
-112   80     
48     80     
-256   192    
-176   -96    
-176   -208   
80     160    
64     -160   
-112   112    
160    144    
0      128    
-176   -16    
-48    112    
112    16     
-144   -32    
0      128    
176    32     
0      64     
-96    128    
96     -16    
-528   -176   
336    64     
-112   80     
304    32     
-368   64     
176    16     
-80    128    
80     32     
-32    80     
-192   -128   
48     32     
-64    96     
32     48     
-176   -128   
-80    -16    
80     -48    
16     16     
176    -80    
-160   0      
96     -96    
-160   48     
128    112    
-384   0      
112    80     
-112   -32    
-96    16     
128    -16    
-112   112    
112    112    
-400   32     
-368   -368   
96     -64    
-160   -192   
112    96     
128    144    
96     112    
96     208    
-48    80     
48     64     
0      -96    
-80    176    
-64    112    
112    16     
96     144    
32     -16    
-160   432    
-176   -48    
-256   -448   
96     176    
-144   -112   
192    -304   
16     560    
-336   -848   
112    128    
-16    256    
-16    -336   
240    352    
-224   208    
-240   -560   
224    144    
-304   -48    
208    448    
-176   496    
32     -112   
-32    0      
-80    -80    
240    128    
-208   208    
48     64     
80     48     
-48    32     
-64    -48    
-32    64     
96     16     
-144   96     
48     32     
-32    80     
64     80     
-112   -16    
144    -224   
-48    112    
256    112    
-224   -208   
112    -48    
-32    -112   
-32    64     
112    32     
-16    -16    
-16    -16    
144    0      
-288   -176   
192    0      
-224   128    
224    256    
-96    144    
32     64     
144    48     
-16    64     
128    112    
-128   48     
128    80     
-80    0      
64     -16    
48     112    
112    528    
112    64     
-96    -64    
16     96     
64     0      
112    112    
-48    128    
-80    -208   
-64    -608   
160    -144   
-96    -112   
-96    -384   
-160   -160   
112    160    
-48    -160   
-160   192    
240    80     
-208   80     
336    176    
-288   144    
48     0      
-80    64     
64     64     
0      48     
-32    96     
144    80     
-80    0      
192    -96    
-288   160    
32     -144   
-96    160    
64     48     
-160   -224   
48     96     
-128   -80    
96     -64    
-16    176    
-144   -368   
-144   -384   
256    176    
-192   224    
144    96     
-192   -32    
-48    -16    
-32    -128   
-32    112    
-80    -272   
-160   -224   
208    272    
-352   -80    
144    -272   
0      176    
160    144    
176    224    
-352   0      
672    96     
-416   272    
96     -320   
160    624    
384    464    
-256   -320   
64     -96    
128    256    
-32    240    
176    -160   
-144   96     
144    32     
-32    208    
192    -16    
32     16     
144    352    
64     208    
80     96     
-160   -96    
112    160    
224    0      
-128   224    
160    64     
-128   112    
256    416    
-96    16     
80     -16    
-16    0      
16     16     
0      -80    
112    -304   
240    128    
-160   272    
400    432    
-16    272    
0      -128   
80     192    
80     -704   
-320   128    
176    0      
-128   -48    
160    -448   
80     256    
48     128    
0      192    
64     -48    
0      96     
-112   0      
-48    -128   
-16    64     
-32    -128   
16     -32    
112    -960   
-48    -224   
400    -1280  
32     112    
224    96     
-208   80     
16     -64    
416    160    
-96    128    
16     32     
-144   -176   
592    32     
-160   192    
384    -64    
-288   16     
320    -144   
-64    80     
112    -160   
-32    -16    
96     -592   
48     16     
80     32     
144    160    
-64    0      
16     80     
32     32     
144    -112   
192    48     
-112   -368   
128    64     
16     -144   
16     -32    
128    -480   
176    96     
48     -64    
96     112    
96     64     
48     112    
16     32     
80     176    
192    96     
-64    176    
112    -16    
-32    -64    
208    64     
48     0      
32     80     
208    160    
48     112    
0      -240   
80     112    
-48    -80    
80     160    
32     48     
48     -320   
80     64     
64     -32    
96     32     
32     -112   
96     -32    
240    32     
-224   -112   
176    -96    
128    144    
-48    0      
96     -736   
-240   -16    
416    -512   
-368   -2048  
304    32     
-304   -784   
240    96     
32     -1872  
-112   -176   
160    96     
48     -176   
144    16     
96     160    
-96    -208   
-192   0      
256    -352   
-80    0      
-144   -256   
176    -192   
-16    32     
-16    80     
64     -96    
80     -576   
96     -32    
32     -832   
16     -96    
-32    48     
96     -48    
-112   -560   
128    80     
-160   -48    
128    128    
16     -16    
32     -64    
80     -112   
288    -208   
112    144    
-160   -480   
112    32     
-64    -400   
192    -80    
-64    192    
64     32     
-208   48     
224    160    
-64    -128   
-128   128    
-48    -16    
-160   16     
-288   -96    
96     -48    
-48    32     
64     176    
272    128    
-32    -176   
48     -160   
80     -672   
-80    112    
-16    32     
-80    32     
144    -80    
-48    -48    
80     -208   
96     16     
-176   -64    
-112   64     
-144   80     
144    -128   
-32    -96    
192    -224   
16     0      
0      0      
224    192    
-128   -48    
208    48     
64     -128   
64     -16    
-16    -96    
224    16     
-48    48     
112    -64    
-320   -128   
144    -192   
-64    96     
96     -96    
32     176    
-48    -96    
-32    16     
48     -496   
64     -16    
-80    -16    
64     112    
0      48     
64     32     
64     -16    
160    160    
-400   192    
-112   -128   
-240   -32    
0      -64    
432    400    
-256   48     
-64    16     
-64    -1728  
16     176    
64     0      
-96    80     
32     -64    
-160   -64    
-64    -96    
32     64     
112    128    
-240   192    
48     -16    
48     -144   
64     96     
-80    -416   
96     48     
112    -448   
0      -80    
-192   48     
-64    -32    
64     80     
-64    128    
112    0      
-80    16     
-16    80     
32     0      
-272   64     
160    -176   
-32    64
[truncated: 50,011 more chars]
