# Supplementary material for: A Fault Diagnosis Method for One‐Dimensional Vibration Signal Based on Multiresolution tlsDMD and Approximate Entropy
Source: Hindawi journal article supplement (doi:10.1155/2019/3262818), 2019-01-01
Supplement: f1 [file 3262818.f1.zip › 3262818.f1/gear signals/wear gear signal/Data3.txt]

-16    144    
96     224    
-128   16     
-80    -112   
160    128    
-208   112    
-96    48     
-960   -112   
224    -144   
-64    -368   
176    -112   
256    400    
32     512    
-64    272    
-16    -48    
-64    -272   
128    432    
-496   32     
208    -32    
-112   240    
16     -208   
0      240    
-576   -272   
128    144    
-192   -256   
304    192    
-128   224    
80     32     
48     96     
-112   48     
16     32     
-48    64     
96     96     
-16    64     
64     48     
-240   -96    
96     80     
-528   48     
176    224    
-240   -128   
160    112    
192    400    
-304   -320   
112    16     
80     112    
-80    176    
-48    32     
48     -192   
-160   -16    
-176   -432   
-112   -256   
144    112    
-112   128    
-48    176    
-320   0      
-160   80     
-176   -192   
32     -160   
48     240    
-144   112    
-64    -560   
160    288    
0      288    
-208   -160   
16     -48    
-128   80     
224    128    
-368   -32    
96     96     
-64    -32    
112    96     
-32    96     
32     80     
80     32     
0      64     
0      64     
-368   -176   
320    -352   
-96    240    
80     560    
-32    224    
-176   16     
32     -32    
-32    240    
64     80     
-32    240    
0      128    
0      224    
16     496    
32     -256   
208    304    
-336   160    
64     -144   
-16    96     
-96    0      
32     -192   
128    288    
-96    336    
0      -64    
240    240    
80     112    
-96    96     
96     208    
-80    16     
96     -32    
-64    288    
432    480    
-432   80     
-32    -304   
64     -464   
-48    128    
560    1072   
-656   -144   
96     -848   
-144   -48    
176    208    
32     176    
96     80     
16     208    
-32    -112   
-16    400    
0      -176   
144    160    
-176   96     
240    80     
-48    432    
160    128    
-64    -224   
96     144    
-224   64     
224    144    
-16    304    
-128   -144   
64     -96    
384    384    
-336   -192   
176    96     
-96    368    
192    464    
-272   176    
-192   -96    
16     -1520  
160    -368   
-16    -96    
32     192    
-16    -64    
224    256    
-112   -16    
80     176    
0      -32    
-80    224    
208    -80    
16     80     
64     96     
-48    96     
-160   -112   
48     -1648  
112    48     
32     -64    
-336   -96    
336    -208   
80     80     
144    224    
-128   176    
-176   80     
112    112    
0      192    
32     144    
-144   -80    
-80    144    
192    624    
96     208    
-32    64     
-112   240    
96     208    
-272   -64    
16     64     
0      48     
144    192    
-112   288    
256    272    
48     16     
-80    96     
48     -48    
16     48     
80     80     
64     80     
-224   -32    
128    -2000  
288    480    
-352   160    
-304   208    
-16    112    
-64    64     
256    368    
-272   -32    
112    -16    
-16    112    
-304   -144   
384    272    
-96    -16    
272    -304   
288    224    
-64    -160   
112    64     
32     -16    
128    80     
64     64     
112    80     
16     -144   
192    96     
-64    128    
-48    96     
-32    64     
-64    -48    
288    -16    
-208   -192   
64     112    
-208   -32    
304    128    
-112   -480   
128    0      
-64    48     
80     192    
16     -48    
176    96     
96     -48    
48     32     
96     0      
-16    -48    
-64    -96    
96     -128   
0      128    
144    32     
-144   64     
48     -1104  
-112   96     
-48    -208   
-112   48     
160    112    
128    0      
32     32     
112    48     
48     96     
80     -48    
-16    -112   
48     -352   
208    128    
-256   -624   
96     32     
96     -192   
16     64     
96     96     
64     112    
96     48     
0      -64    
-80    -160   
112    80     
-160   336    
672    208    
-320   112    
48     -192   
-48    64     
256    -192   
32     80     
16     -16    
288    80     
-176   -160   
80     -96    
144    16     
224    224    
-96    128    
-32    -112   
336    240    
-144   -160   
-144   -112   
224    -224   
-32    128    
208    -96    
112    208    
-80    0      
-16    128    
64     32     
0      -880   
208    224    
-96    -816   
-16    -448   
96     -16    
-112   -816   
208    -128   
32     144    
-176   -64    
128    80     
16     -80    
112    128    
-48    -320   
32     -1072  
32     -144   
80     -288   
48     32     
-48    64     
144    -80    
-64    -192   
64     -288   
128    32     
-32    -288   
-80    16     
192    -688   
112    -128   
80     128    
-96    -128   
128    0      
-32    64     
-16    48     
96     32     
-336   -160   
-80    -240   
-512   -32    
-144   -240   
160    -32    
-176   -192   
240    -32    
64     -224   
-144   -128   
176    288    
32     16     
-96    -288   
64     -64    
80     -112   
-208   -32    
48     -112   
464    496    
-864   144    
352    0      
-112   48     
80     144    
192    208    
-160   -416   
48     -144   
160    -368   
-144   48     
96     32     
-48    80     
112    -128   
96     -144   
0      -32    
208    32     
-32    0      
256    -64    
-704   208    
304    80     
0      240    
128    80     
-48    0      
-64    -688   
0      -240   
112    -32    
-48    160    
-112   -96    
224    272    
-480   -512   
192    -192   
-464   -208   
-80    -400   
-48    96     
16     16     
-80    112    
112    -224   
-144   -496   
112    -576   
-80    112    
96     -1296  
0      32     
224    336    
-128   192    
-96    -368   
96     -320   
128    432    
-208   -48    
-288   -464   
240    112    
-512   160    
-48    -176   
80     -128   
-112   -64    
160    32     
-16    -656   
-128   32     
16     -160   
80     208    
144    -16    
0      -80    
96     176    
-160   -80    
128    176    
64     -80    
-176   64     
272    352    
-160   208    
112    -176   
0      -32    
144    -512   
-16    0      
16     -16    
-48    32     
-144   48     
64     -176   
-112   16     
-96    -96    
-176   128    
192    -48    
-496   -368   
272    -32    
176    352    
-208   -368   
-96    176    
-112   -1088  
400    -48    
-48    400    
-208   64     
208    -528   
-16    144    
-288   -48    
64     -64    
16     208    
0      -176   
80     -48    
-192   32     
256    144    
-544   -208   
144    112    
-16    16     
-928   176    
0      416    
-1216  144    
-80    -544   
-144   -384   
272    96     
-96    -96    
64     112    
176    -32    
0      400    
-144   -176   
-16    -240   
0      0      
144    288    
96     704    
-528   336    
-272   -640   
32     -448   
-80    16     
-208   144    
-192   0      
16     -96    
-80    -240   
-544   -160   
32     80     
240    64     
-384   -464   
16     -592   
64     208    
-16    96     
-96    32     
-144   -48    
272    144    
-176   0      
48     64     
48     64     
-1168  48     
-64    64     
-80    -96    
64     48     
-112   -16    
-128   -16    
32     -64    
-128   48     
80     352    
-80    416    
-448   -528   
352    -640   
-32    1088   
0      144    
-224   -704   
-224   352    
-144   96     
64     -96    
64     496    
256    -16    
-256   144    
80     -160   
32     224    
-112   -48    
112    240    
-128   160    
160    208    
-176   -64    
-208   -448   
32     272    
-512   -400   
144    96     
-1104  32     
0      -80    
-48    -64    
48     144    
-80    432    
80     -384   
-128   -80    
16     192    
208    336    
-208   -16    
16     -32    
-160   -16    
176    112    
-176   48     
48     -176   
-560   0      
48     32     
-304   -528   
0      -416   
144    -208   
-128   32     
160    48     
-224   48     
96     160    
-128   144    
144    -48    
272    128    
-192   64     
-160   -48    
96     112    
-336   -112   
160    240    
16     80     
-32    144    
160    -16    
-384   -208   
368    -96    
-240   112    
96     128    
-48    80     
64     0      
48     -48    
0      64     
-224   32     
16     160    
-112   -80    
160    160    
160    224    
-288   64     
288    64     
-256   64     
224    64     
-96    96     
288    48     
-272   16     
-16    48     
-128   -16    
288    256    
-176   -96    
96     0      
0      96     
112    16     
-64    64     
64     176    
48     64     
-48    160    
432    64     
-400   -464   
224    -304   
48     -80    
-48    80     
160    -32    
128    144    
-64    80     
0      112    
-160   -128   
-112   -16    
240    96     
-144   -176   
144    -128   
-128   -192   
16     -192   
-16    80     
-288   -80    
352    176    
-96    -16    
-256   -256   
112    -16    
-80    32     
112    224    
-240   0      
-16    80     
160    240    
64     128    
-32    16     
48     -80    
-32    -112   
96     144    
-16    -96    
16     32     
0      112    
112    -16    
272    176    
-112   -64    
336    144    
64     64     
48     48     
128    -48    
64     16     
-384   -32    
144    64     
-256   16     
368    176    
-176   288    
-64    128    
-64    64     
-112   -64    
96     16     
-48    96     
-16    80     
0      96     
-16    80     
0      16     
96     96     
240    176    
-304   64     
-80    -320   
16     64     
0      144    
-48    16     
-96    112    
32     -96    
-16    0      
96     32     
112    -800   
176    192    
-160   64     
-16    32     
208    -32    
272    160    
0      112    
-112   80     
240    304    
-256   0      
32     96     
176    -32    
-32    80     
144    144    
-128   16     
112    -528   
-48    80     
64     80     
-16    -64    
64     64     
64     -32    
-144   16     
272    -144   
-96    176    
96     64     
-112   64     
240    112    
0      0      
64     96     
208    208    
-208   -112   
128    80     
-96    -160   
160    -48    
16     80     
-48    64     
-16    -32    
64     -80    
0      -128   
192    -16    
-176   16     
320    288    
-128   16     
32     96     
16     64     
224    -576   
0      64     
-64    -2896  
128    -224   
224    144    
-80    272    
32     80     
64     112    
0      -224   
64     112    
96     48     
0      64     
-32    0      
336    144    
32     336    
-64    -48    
-96    160    
0      -416   
-64    -48    
-80    48     
432    608    
-64    112    
80     192    
-80    -272   
96     352    
48     32     
304    320    
-224   224    
160    208    
0      368    
16     -48    
48     32     
48     -448   
80     176    
32     -752   
192    128    
-224   -48    
48     -336   
-208   -224   
128    112    
64     288    
-80    112    
80     16     
112    -176   
-48    -32    
64     128    
96     256    
-48    -400   
64     -336   
128    -1216  
-80    -192   
144    -240   
208    640    
16     80     
160    -272   
208    832    
16     -1040  
-16    176    
112    -96    
0      112    
128    -112   
-32    192    
0      -480   
160    352    
48     80     
96     144    
-256   -720   
352    624    
-128   16     
192    144    
-80    -16    
208    -240   
-48    304    
-32    -288   
432    112    
-96    320    
400    -128   
-48    -272   
64     -160   
160    48     
-64    64     
-16    -112   
32     48     
-80    -48    
272    480    
352    112    
16     160    
16     400    
224    -192   
-32    96     
-64    -144   
352    400    
-544   -752   
192    336    
-272   32     
0      -224   
-112   -224   
368    -448   
512    896    
-112   -672   
0      -304   
-112   -48    
272    -656   
-240   240    
368    -2208  
-16    -48    
176    240    
16     80     
16     256    
352    -192   
96     -160   
16     112    
416    -16    
-288   304    
320    -288   
-304   -848   
288    -528   
48     256    
208    -384   
-80    -176   
32     -208   
0      -880   
144    144    
0      -16    
80     0      
-336   -768   
336    192    
176    400    
16     -224   
112    400    
32     176    
80     0      
16     -112   
176    0      
-176   -208   
480    -48    
112    480    
-16    -576   
48     -1392  
144    16     
144    -192   
32     288    
304    -16    
0      16     
48     -16    
-16    -16    
224    32     
16     -48    
128    48     
112    -48    
112    112    
0      -576   
-208   368    
256    -432   
96     -128   
560    1040   
-272   1328   
32     -1120  
208    208    
16     608    
-64    -672   
-480   304    
176    -1008  
-832   144    
448    160    
-448   -576   
160    -48    
96     -224   
-112   352    
144    48     
-32    -48    
-64    144    
112    368    
176    240    
-160   -96    
224    80     
-320   -416   
0      128    
-368   -144   
-32    160    
144    368    
96     -208   
-288   64     
192    -400   
-48    48     
0      -560   
0      96     
48     96     
48     -32    
-64    0      
32     -128   
-64    400    
224    192    
64     112    
-176   -304   
-128   -288   
576    352    
-336   256    
80     -336   
64     208    
-160   -624   
-16    -96    
0      192    
192    176    
-656   -448   
368    16     
-384   192    
32     64     
-192   0      
64     -224   
-336   -32    
304    -80    
-208   112    
0      16     
-32    -208   
0      -1216  
112    16     
-384   -192   
112    -48    
16     96     
32     128    
-16    96     
272    160    
-240   16     
112    64     
-192   0      
-80    -48    
224    80     
112    -32    
-16    96     
0      -176   
176    16     
-16    80     
160    0      
64     96     
-80    -192   
64     0      
160    -112   
-256   -32    
192    32     
16     80     
-528   0      
-304   48     
-528   -160   
-16    48     
128    96     
-720   48     
-16    80     
-800   128    
-176   288    
368    48     
-144   -32    
64     -224   
0      -48    
80     80     
-16    48     
-448   -304   
-64    0      
-176   -272   
-64    -32    
64     0      
-64    -32    
-112   -32    
-16    -112   
0      -96    
-1040  -16    
304    64     
-128   48     
-48    -80    
-256   -48    
-224   -128   
240    -144   
16     112    
144    32     
-192   -112   
-16    16     
-64    -32    
-192   -64    
-128   96     
-256   112    
-240   16     
224    144    
-320   -96    
-96    -112   
-96    -192   
-320   -304   
224    -272   
16     192    
160    -48    
-64    -80    
32     16     
224    240    
-16    272    
80     -80    
144    -32    
-112   -128   
-304   -80    
-1104  -16    
0      64     
-64    -64    
16     160    
16     224    
160    560    
16     176    
-192   -224   
144    32     
0      -240   
-32    16     
-64    48     
-16    64     
0      64     
16     -16    
-272   80     
192    112    
-1008  128    
-336   64     
48     -144   
0      80     
192    80     
-112   48     
-64    80     
144    0      
-176   48     
48     0      
144    160    
-96    80     
160    80     
-112   64     
160    112    
-624   -32    
-64    160    
208    -96    
-160   64     
32     -16    
-32    32     
144    96     
-80    -16    
-80    16     
-48    -64    
-112   96     
144    176    
48     192    
-304   -224   
224    208    
-672   -64    
64     128    
160    112    
80     80     
-96    48     
-32    -48    
96     48     
-160   144    
16     80     
80     112    
192    160    
-112   128    
48     32     
-208   -176   
224    32     
0      96     
0      0      
96     48     
-32    32     
-112   32     
144    128    
-32    32     
16     64     
96     96     
-48    16     
80     -16    
-80    112    
160    256    
-304   16     
80     96     
96     160    
-192   112    
32     176    
-128   64     
-128   -16    
16     -80    
-80    -64    
144    80     
-192   48     
32     96     
0      16     
-80    64     
-16    128    
64     336    
32     176    
-400   -288   
224    -16    
-48    128    
128    192    
112    432    
-32    528    
176    400    
-80    144    
0      64     
-64    0      
16     48     
128    304    
32     224    
-256   -224   
-64    -48    
-16    0      
32     144    
-48    -64    
32     224    
48     -32    
32     48     
32     224    
-160   -272   
144    -48    
-80    96     
-16    -160   
256    400    
-112   192    
128    -96    
112    816    
256    16     
112    608    
80     -160   
112    -560   
64     176    
80     192    
16     -16    
48     32     
80     224    
-112   48     
128    16     
-320   -96    
64     64     
-96    -48    
48     176    
32     240    
80     144    
0      -48    
-16    64     
112    64     
-80    96     
32     64     
16     -96    
-112   304    
160    -64    
112    176    
-64    352    
48     -160   
-144   -208   
32     -800   
16     -32    
-128   384    
64     -336   
-64    384    
160    80     
80     -224   
64     224    
-16    16     
48     -32    
560    400    
-400   352    
80     -64    
-240   -224   
32     -48    
736    -544   
-592   352    
0      -272   
272    32     
80     496    
0      -80    
-112   96     
256    -256   
-208   160    
272    144    
-16    -64    
272    224    
32     304    
272    -96    
-16    16     
112    -480   
320    416    
112    176    
176    -224   
176    288    
-256   -16    
64     -432   
-256   16     
48     -48    
16     176    
64     304    
64     16     
-320   -80    
0      -752   
128    192    
-224   -32    
272    272    
192    -544   
-272   -80    
-64    -240   
48     -208   
320    448    
16     -16    
192    -16    
48     96     
32     -96    
48     336    
208    -80    
208    48     
64     -96    
64     16     
-80    192    
-208   -1120  
112    -272   
-16    -576   
400    784    
-272   -96    
320    -80    
176    272    
-80    32     
-48    192    
128    -416   
192    416    
80     -384   
80     1264   
-32    -1616  
32     -352   
192    640    
-144   -208   
128    -1264  
16     -112   
176    80     
48     160    
-240   -416   
576    240    
-144   496    
48     272    
0      -48    
-32    -384   
272    256    
-80    368    
256    32     
48     -352   
64     -208   
-16    -16    
144    -64    
0      -528   
112    48     
-16    -176   
192    128    
-240   -128   
48     -416   
32     -96    
-16    -480   
-80    -160   
32     -688   
32     176    
48     144    
128    128    
-48    -896   
-128   -64    
16     -208   
16     560    
192    272    
-16    -48    
16     256    
32     -528   
96     112    
-48    -256   
48     112    
-16    160    
176    -96    
-32    192    
256    144    
-48    -320   
16     -368   
80     48     
224    96     
-144   80     
-32    320    
144    -176   
-64    -128   
-32    -480   
0      -176   
320    288    
-256   176    
32     0      
32     -144   
224    272    
112    304    
48     96     
-16    128    
80     -880   
-176   -224   
16     -528   
288    -416   
-144   -16    
0      -832   
-80    -176   
160    -2096  
-224   -352   
176    16     
48     96     
48     80     
-80    -256   
64     -752   
-16    80     
128    -608   
-144   80     
-48    -32    
-48    -112   
-64    -352   
80     -464   
256    -64    
16     96     
-32    -112   
144    -128   
96     48     
240    -336   
-144   48     
48     -256   
32     112    
-128   96     
32     96     
-80    -96    
176    -144   
48     -64    
176    -144   
0      -80    
96     -16    
64     32     
240    16     
-160   16     
96     -128   
176    192    
-128   -32    
80     128    
16     -16    
48     -208   
-80    64     
-80    -112   
-192   -32    
144    64     
64     -240   
144    -304   
-32    -240   
160    -272   
-16    -64    
224    -336   
-32    176    
64     -16    
64     -64    
368    -80    
-112   -16    
-256   32     
-144   -208   
-32    -128   
-32    -48    
-1024  -48    
240    0      
80     -112   
144    96     
144    144    
128    -448   
112    128    
-160   -80    
160    80     
-128   -64    
80     -48    
-160   -80    
432    144    
-112   -144   
64     -48    
-80    0      
176    80     
-320   48     
96     80     
48     64     
16     -864   
-48    48     
16     -1424  
304    128    
-208   -80    
160    160    
-208   560    
224    -208   
-128   128    
192    -96    
-272   -160   
256    -64    
-352   16     
208    -112   
-288   -48    
480    -176   
-224   48     
64     -1520  
320    32     
-112   32     
32     0      
-512   -208   
368    -96    
-240   -16    
-16    -48    
-48    -16    
-96    -16    
144    -64    
-80    -80    
-16    64     
144    16     
-304   112    
64     -272   
-16    -96    
-160   16     
208    -32    
-480   32     
240    -48    
-96    80     
128    -64    
-96    -32    
160    -144   
112    160    
64     -16    
-32    64     
112    -224   
-192   -144   
64     -64    
-560   -16    
-96    32     
48     32     
192    48     
-224   64     
-96    -48    
-80    -32    
-32    -64    
48     -32    
-96    80     
-272   -144   
224    96     
-192   -224   
80     80     
-128   48     
-112   64     
-80    -272   
-96    96     
-112   96     
-1120  64     
-48    32     
80     16     
64     -64    
-144   -176   
80     -112   
32     -48    
32     160    
-240   -112   
-432   80     
160    224    
-64    -320   
-224   48     
-32    -32    
80     64     
-832   -16    
-64    -16    
0      0      
80     64     
96     32     
16     48     
-112   -64    
64     80     
16     48     
-16    0      
-32    128    
288    528    
-160   544    
-464   -416   
208    -544   
-48    864    
-16    -16    
-976   -208   
-96    192    
-112   -208   
0      80     
-64    -96    
32     32     
32     64     
-16    64     
-48    16     
-80    16     
0      48     
256    304    
-544   -1008  
304    192    
-208   224    
-128   -464   
-112   224    
-80    80     
64     144    
-32    16     
48     80     
32     -128   
48     -16    
-32    368    
16     -80    
-32    80     
-128   240    
80     -384   
-144   128    
-32    128    
-576   -224   
-96    0      
-1536  16     
-16    64     
128    -16    
-304   -16    
64     -272   
32     304    
-64    192    
0      192    
-16    144    
-176   -48    
-144   48     
-272   -464   
-112   -64    
-192   64     
64     160    
-64    240    
-80    480    
48     96     
-48    32     
64     48     
-96    64     
192    80     
-288   16     
192    -32    
-144   96     
144    64     
-224   16     
112    48     
-208   0      
64     112    
-464   -64    
-144   -144   
48     -688   
-32    -272   
288    0      
-224   -16    
96     160    
16     208    
144    128    
64     288    
64     304    
-192   -48    
192    368    
-176   0      
-112   32     
-48    -128   
64     -48    
-80    96     
96     240    
-128   432    
176    240    
-256   -128   
-48    128    
112    -160   
-96    48     
32     96     
-384   -272   
80     -144   
-80    -128   
-80    448    
512    -144   
16     384    
16     592    
-32    -432   
0      48     
80     48     
-48    -48    
144    80     
-144   160    
48     16     
-48    -48    
-384   -480   
336    0      
128    304    
-240   432    
-64    -160   
-64    16     
-32    48     
-48    48     
192    -272   
64     384    
96     400    
-224   208    
464    0      
-144   368    
-16    -32    
-144   -224   
144    240    
-224   -64    
480    160    
-640   -656   
144    -112   
-48    64     
32     -192   
-336   -736   
-176   -224   
224    64     
-176   -208   
-96    -176   
208    -144   
-368   16     
224    320    
160    384    
-112   752    
272    592    
-240   192    
128    208    
-64    176    
-48    144    
-112   112    
-160   224    
112    0      
-176   -288   
-16    -560   
64     -272   
-32    -48    
32     -16    
-144   -272   
160    -144   
32     16     
224    112    
0      0      
144    96     
-48    96     
128    272    
96     128    
-80    -32    
64     -64    
176    112    
192    176    
-192   144    
-48    272    
144    -32    
0      -48    
192    -960   
48     160    
-96    80     
192    256    
-256   -32    
224    32     
128    160    
-48    -96    
272    240    
144    192    
-80    96     
0      192    
64     -80    
16     -80    
80     48     
16     -592   
16     -112   
-32    -16    
240    -32    
96     112    
112    96     
-32    16     
64     160    
64     112    
-128   96     
64     -80    
-48    128    
128    64     
-224   -144   
256    128    
-80    64     
80     32     
96     144    
80     96     
32     64     
80     -192   
32     -16    
96     144    
-288   -224   
192    16     
-16    80     
208    16     
-80    -16    
-32    -272   
128    80     
-32    -128   
128    32     
-160   -1936  
80     64     
-32    96     
80     32     
0      -48    
32     -32    
48     -32    
144    112    
0      -48    
64     16     
64     -16    
-48    -112   
32     80     
96     -128   
-64    80     
32     -432   
112    80     
128    -304   
-160   64     
-48    128    
176    -16    
16     96     
96     64     
-80    64     
48     48     
0      112    
160    128    
64     112    
96     -64    
-96    80     
-16    16     
224    192    
-112   -144   
96     16     
96     0      
-48    64     
128    96     
32     112    
128    64     
-64    0      
0      -240   
-48    -544   
320    176    
-128   -272   
192    144    
-96    -64    
144    128    
16     -224   
64     -16    
-80    -48    
32     192    
240    256    
16     208    
-80    -64    
96     48     
-32    16     
-64    -176   
48     16     
-48    -208   
96     64     
80     -128   
176    80     
48     -400   
112    112    
-144   48     
80     80     
16     64     
176    128    
-64    -48    
80     -224   
-16    48     
0      112    
-16    160    
80     32     
-16    64     
0      -48    
48     -128   
-240   -640   
208    112    
-144   -128   
64     16     
0      112    
320    -1072  
-64    -1456  
144    -112   
-32    -48    
16     -144   
192    0      
144    -96    
-288   32     
384    48     
-240   240    
64     -208   
0      -320   
32     64     
240    -240   
-368   -32    
-384   -96    
240    -112   
-144   -160   
224    -96    
-128   64     
128    -672   
32     64     
112    128    
-64    -48    
-32    0      
96     -128   
224    -160   
-256   96     
128    -272   
128    96     
-48    48     
144    -80    
-16    -80    
176    112    
0      0      
48     -160   
64     48     
96     -16    
-48    -240   
96     -496   
96     16     
-208   -128   
-80    -16    
224    0      
-96    16     
-32    -112   
-128   -448   
-80    -208   
48     -272   
128    -16    
240    96     
-464   -48    
128    -208   
-16    -192   
560    -288   
-176   144    
0      -80    
176    144    
-32    -64    
144    32     
-176   -16    
80     -48    
-160   -176   
-112   -128   
80     -208   
-80    -32    
96     416    
32     0      
64     112    
-32    -352   
-32    48     
16     -64    
192    208    
-96    208    
0      -160   
-48    -144   
176    64     
-240   -160   
128    -96    
-528   -288   
32     416    
48     -208   
-80    -144   
-208   16     
0      -208   
-48    -112   
64     80     
272    -224   
-224   176    
176    -208   
-144   80     
144    16     
-480   -144   
176    -48    
-816   -144   
-48    -80    
-720   -128   
16     48     
240    688    
-80    -816   
-32    -144   
-160   -1488  
544    80     
-480   0      
224    32     
-96    16     
16     16     
-176   -16    
80     32     
-64    0      
64     96     
-320   64     
64     -160   
-240   32     
256    -352   
48     128    
-48    -816   
-64    -16    
-240   0      
96     -48    
-208   32     
64     -80    
-192   -128   
192    -304   
96     224    
48     64     
128    -96    
96     -96    
128    224    
160    0      
128    -80    
-112   0      
112    -112   
-336   -64    
144    -112   
-96    48     
16     128    
-64    32     
-128   -208   
-160   32     
32     -112   
-560   -80    
-16    -144   
192    -64    
128    -16    
80     240    
-80    704    
384    864    
-176   368    
32     624    
80     416    
-80    -176   
-160   -64    
-32    -96    
-272   -128   
64     -80    
368    304    
-528   272    
16     128    
-96    -80    
-368   -112   
16     112    
-256   -16    
80     64     
-448   32     
-224   -416   
-1776  -720   
-96    -32    
144    496    
144    80     
-128   -80    
208    32     
-288   -352   
64     -80    
-144   -144   
-400   -48    
112    320    
-48    976    
-400   -288   
-112   -480   
-16    224    
-880   112    
-64    656    
128    -336   
0      -624   
96     0      
-16    976    
-32    -656   
-128   -16    
48     32     
-160   16     
64     16     
-272   224    
176    176    
16     -144   
-112   -96    
112    160    
-16    80     
16     1184   
144    -80    
-176   -416   
160    96     
-48    -176   
32     -192   
32     64     
288    704    
288    432    
-240   240    
160    -32    
-64    48     
-32    -128   
-96    0      
48     112    
-528   -96    
-80    16     
96     32     
48     592    
176    160    
-96    128    
-32    112    
-160   -80    
144    112    
-320   16     
288    304    
-416   16     
64     16     
-256   -32    
-224   -208   
-208   -256   
112    160    
-1232  -64    
256    160    
-272   48     
32     0      
-48    80     
224    112    
240    192    
-176   -144   
176    16     
192    80     
-32    48     
0      -16    
-112   0      
224    48     
176    176    
-144   16     
416    384    
-384   256    
-48    112    
-240   240    
96     48     
-16    96     
-240   -112   
64     0      
-80    32     
-48    112    
-80    112    
80     80     
-160   -32    
64     112    
-608   -48    
128    144    
-32    80     
-224   48     
96     0      
48     176    
-224   16     
32     -128   
-48    96     
64     64     
0      48     
192    208    
-128   192    
-400   -528   
-16    -64    
-112   224    
112    224    
-256   144    
0      16     
64     64     
160    112    
-192   -16    
0      -32    
-16    -48    
32     240    
64     80     
-224   -96    
80     112    
-32    -64    
32     128    
-96    16     
64     64     
32     32     
-112   -64    
112    -64    
-144   -80    
-16    -112   
240    32     
-64    192    
16     -48    
32     -16    
-32    32     
160    176    
-32    80     
-240   -112   
384    -160   
-320   0      
224    16     
-112   32     
128    80     
-16    48     
-16    -160   
16     0      
128    80     
-112   112    
144    80     
-144   16     
400    192    
-400   16     
64     112    
64     48     
-16    -32    
208    112    
-48    32     
96     0      
96     48     
-16    -208   
-64    192    
192    32     
-48    128    
80     -16    
-48    96     
320    96     
-272   128    
-48    16     
80     160    
80     -16    
64     64     
32     80     
240    128    
-112   80     
80     160    
16     16     
560    480    
-496   48     
32     -144   
176    -240   
80     144    
-64    96     
0      0      
48     80     
48     -16    
-16    160    
16     112    
-32    128    
240    128    
-80    144    
128    192    
144    128    
-208   -160   
208    -16    
-128   0      
112    144    
96     96     
16     -720   
48     16     
112    48     
-144   144    
32     64     
-96    80     
208    64     
-160   128    
0      -16    
96     112    
-32    -208   
288    -144   
-80    96     
208    -112   
-32    16     
112    -112   
112    96     
-80    16     
112    0      
-32    16     
128    144    
-208   -80    
272    0      
-208   64     
192    80     
-128   128    
208    96     
-48    -64    
-144   -32    
96     64     
32     -384   
-80    128    
48     96     
16     48     
96     96     
-96    32     
0      32     
0      80     
32     144    
64     160    
96     -80    
-192   -192   
48     -624   
-160   -368   
432    288    
-96    -368   
16     0      
96     -2304  
192    160    
208    96     
-144   112    
80     -240   
-64    128    
288    144    
-336   -208   
80     -128   
224    224    
96     144    
-208   -160   
160    32     
64     0      
-144   -32    
160    -480   
96     48     
96     -144   
-96    48     
-96    -112   
224    48     
112    -32    
16     160    
-144   -96    
560    528    
-352   480    
64     256    
-80    192    
16     -112   
0      80     
64     -992   
224    368    
-32    -640   
64     240    
-160   80     
400    240    
-320   -128   
-32    -288   
0      -80    
192    176    
-128   192    
32     -16    
144    0      
304    32     
64     112    
80     -48    
64     32     
144    -128   
64     320    
32     -112   
-96    48     
160    272    
-64    -384   
-336   -1120  
496    -112   
-208   240    
80     -272   
80     16     
-160   -416   
336    336    
-304   -112   
256    -192   
-80    320    
208    288    
16     -128   
96     192    
64     288    
-160   16     
112    -112   
-64    -112   
-16    -288   
192    -256   
144    208    
0      -64    
128    16     
96     -256   
0      176    
144    -32    
-64    128    
128    432    
144    -1664  
-32    16     
-1200  -96    
-144   -704   
96     464    
160    -432   
48     -32    
-224   304    
320    -144   
-192   96     
144    -144   
-32    32     
64     -64    
176    -608   
-48    64     
176    -896   
-80    32     
-592   -64    
80     -224   
-176   -240   
192    -496   
64     -368   
64     -992   
-16    -96    
192    0      
-80    64     
48     288    
-16    112    
80     -208   
0      -64    
32     0      
64     64     
-176   -48    
464    192    
-96    320    
96     -304   
-80    -352   
96     -224   
224    16     
-48    -80    
80     0      
16     -224   
48     368    
96     -16    
-224   -192   
112    -192   
-64    -48    
-144   96     
-80    16     
-272   0      
48     -16    
64     480    
128    80     
-272   -304   
352    400    
144    272    
144    400    
-144   -16    
16     -80    
-16    112    
96     -16    
80     -48    
224    272    
-160   368    
-480   112    
160    -64    
96     192    
128    -128   
-16    0      
176    -336   
-96    -64    
-16    -480   
224    608    
-192   176    
-176   -896   
-32    144    
16     -48    
-240   -384   
128    -16    
-272   48     
-64    -592   
-1008  -368   
256    880    
-528   -160   
32     -240   
-16    -128   
48     -1216  
128    -336   
112    -48    
96     64     
-160   -16    
48     16     
-208   -656   
304    -64    
-384   -352   
160    -480   
-624   -336   
208    48     
96     496    
96     640    
208    528    
-64    -160   
192    144    
-144   -944   
496    400    
0      176    
-96    -32    
-128   -112   
128    -192   
-32    80     
-160   -32    
192    96     
-624   -96    
304    -16    
-32    -224   
96     48     
-32    -352   
144    48     
-240   64     
-48    32     
144    176    
16     -16    
-16    464    
224    -208   
-64    0      
304    32     
-176   -64    
160    16     
64     16     
-32    -224   
176    176    
160    -160   
256    240    
-144   96     
32     -64    
-80    16     
0      -48    
-256   0      
256    32     
-144   0      
112    192    
-256   -160   
464    80     
-608   16     
304    -96    
64     96     
-208   32     
80     64     
-144   -48    
288    -272   
32     16     
192    96     
-32    0      
-160   -32    
384    48     
32     -64    
-80    32     
-96    -160   
160    288    
64     -64    
64     96     
-224   -176   
-320   -112   
-112   80     
-32    -16    
-80    48     
32     -112   
48     64     
-1680  -48    
-48    -16    
224    -16    
-192   48     
-112   64     
-256   96     
-112   -160   
-48    144    
16     -16    
-160   -144   
-64    0      
128    -80    
-96    -80    
0      0      
-32    96     
-208   -80    
112    64     
144    64     
0      32     
-48    32     
112    240    
-256   -288   
144    96     
48     112    
-96    -48    
96     224    
-208   -32    
-16    64     
-32    -48    
-80    0      
-32    -16    
64     112    
16     0      
-192   -16    
176    -352   
-224   272    
176    -128   
-144   48     
-48    16     
-48    64     
16     32     
-48    32     
-64    48     
32     128    
128    128    
-240   32     
-16    0      
-784   48     
-32    -32    
-48    -304   
-128   -224   
240    -32    
-96    80     
-32    48     
32     128    
-80    80     
-64    80     
176    64     
-128   112    
160    16     
-304   144    
128    80     
-272   64     
304    48     
-400   -16    
80     80     
80     96     
-80    32     
-96    64     
-80    -16    
48     -176   
160    64     
16     96     
-192   -64    
32     -48    
-128   0      
16     80     
-160   16     
0      128    
16     64     
-80    128    
-48    16     
-80    16     
-160   400    
144    112    
-160   32     
176    32     
-160   -32    
-128   -112   
-16    -48    
-48    48     
48     48     
-144   16     
144    128    
-384   -64    
16     16     
-16    96     
64     144    
80     80     
-32    -32    
0      80     
192    32     
-352   0      
288    -48    
-160   112    
0      64     
96     80     
-256   -176   
240    160    
-256   144    
-256   32     
48     -16    
128    -64    
128    112    
-80    144    
-16    80     
-48    -64    
48     32     
112    48     
32     16     
-192   -144   
288    144    
-112   -64    
144    160    
-64    -224   
96     32     
256    880    
96     384    
-272   -80    
112    320    
32     256    
64     -16    
112    0      
-16    112    
-48    96     
-96    48     
32     48     
-48    -64    
16     80     
96     208    
-32    32     
-16    -64    
96     64     
-304   -928   
-176   -576   
240    -16    
48     96     
16     64     
-128   256    
112    144    
-144   112    
-16    -144   
96     -448   
96     0      
-144   -528   
48     -112   
112    -112   
160    64     
0      304    
-96    112    
32     576    
240    48     
48     192    
-208   32     
128    80     
-32    16     
32     96     
-304   -32    
256    208    
-256   -64    
160    16     
-112   -128   
336    -176   
-288   -48    
160    32     
-160   112    
112    304    
-176   -128   
224    -384   
384    688    
-112   592    
208    -496   
-192   96     
176    640    
-256   -288   
208    80     
-112   176    
64     -32    
-32    -48    
128    -128   
96     576    
48     -48    
-32    80     
-64    80     
0      32     
16     -96    
0      304    
32     128    
208    -736   
-64    80     
192    16     
80     96     
-48    96     
-112   144    
192    64     
-32    64     
-48    16     
64     0      
32     16     
-96    208    
-112   -80    
288    400    
-32    176    
-96    -1152  
-48    -304   
-32    208    
96     384    
-80    48     
544    576    
-224   800    
-112   288    
-176   -272   
-144   -384   
176    -656   
240    384    
-128   128    
-192   -544   
96     -400   
-144   -1536  
112    -192   
-16    -80    
112    -144   
96     176    
64     240    
32     -32    
-32    -96    
448    16     
-304   112    
144    32     
96     112    
0      0      
32     16     
48     80     
48     -128   
0      48     
48     -144   
64     96     
80     112    
192    32     
-288   -32    
384    224    
-288   64     
144    -384   
16     32     
128    352    
32     96     
160    144    
-96    304    
-64    -240   
-80    -128   
80     -832   
-336   -32    
96     -1520  
16     -96    
32     144    
64     208    
-80    -64    
16     -96    
-80    -256   
-16    96     
48     -144   
192    80     
16     544    
80     -544   
16     784    
-48    -544   
112    192    
16     -336   
64     -144   
-144   -320   
304    -112   
16     768    
432    1248   
-80    -832   
112    176    
-80    144    
288    -416   
-96    48     
192    -624   
0      336    
96     80     
272    1056   
-160   -608   
192    176    
-128   0      
-16    64     
80     96     
-16    -16    
80     160    
176    -80    
-32    32     
-16    -336   
64     160    
208    704    
176    320    
-80    -96    
144    256    
-48    -512   
96     -64    
0      -32    
144    144    
256    224    
0      32     
160    464    
96     -32    
0      64     
160    -32    
-64    96     
16     -32    
-16    -32    
32     -160   
224    416    
80     -288   
176    160    
112    416    
48     -448   
-80    240    
-800   -64    
64     -816   
-32    -176   
48     -928   
272    32     
144    -432   
-144   -96    
32     0      
32     -224   
64     0      
32     32     
-16    -16    
32     16     
32     -208   
-208   -288   
-656   -560   
80     -112   
112    96     
-64    -400   
32     -144   
176    -1392  
128    -16    
-224   128    
48     -96    
-80    -80    
224    -112   
112    -192   
-240   48     
64     -192   
16     64     
-240   112    
32     144    
176    208    
64     32     
96     -160   
-16    0      
160    -16    
192    352    
-208   -112   
240    -320   
-144   80     
272    -224   
-240   -16    
160    48     
128    64     
96     -48    
-192   -192   
-400   -32    
80     -128   
128    -32    
352    0      
-208   16     
64     -304   
0      80     
176    -272   
-288   -48    
416    80     
-112   112    
112    144    
-288   -192   
112    -32    
192    -320   
-224   -96    
112    16     
96     -16    
48     -128   
192    -96    
208    -336   
112    -80    
-176   -464   
304    96     
144    64     
112    128    
0      -16    
-16    -144   
-64    112    
192    -16    
64     32     
0      16     
-592   32     
400    -32    
-352   -32    
112    -208   
48     144    
32     -192   
-16    96     
-32    -96    
48     -96    
-96    -16    
160    48     
64     -176   
128    256    
-192   176    
0      -64    
-16    272    
208    -272   
-400   48     
128    -112   
192    32     
-96    -544   
160    192    
272    -672   
-224   -240   
32     -160   
128    32     
160    48     
64     -32    
-368   -128   
96     -112   
-48    80     
192    112    
-80    96     
128    -96    
-112   32     
112    -288   
80     64     
32     80     
-48    48     
-176   -160   
112    0      
-256   32     
288    64     
-352   -192   
144    32     
240    80     
-16    -144   
48     128    
128    -176   
-144   80     
128    -144   
0      256    
-64    144    
64     -16    
-96    -64    
224    -48    
-64    48     
-48    -48    
16     0      
80     16     
-48    80     
-32    -128   
16     96     
-704   -144   
16     32     
-144   -96    
-96    96     
-144   -16    
-416   0      
-160   -32    
-448   80     
-208   -16    
16     64     
-48    -64    
96     -160   
-48    -112   
-1056  -208   
112    64     
-192   -80    
-16    0      
-480   -176   
-320   -112   
-32    -64    
-224   128    
64     32     
-240   32     
160    16     
-416   448    
-320   208    
-16    -112   
16     0      
-176   0      
160    -80    
-32    48     
-32    96     
-96    80     
-176   -16    
-16    96     
0      48     
-32    -112   
-96    32     
80     240    
-880   -96    
128    -160   
-256   0      
448    -96    
-64    80     
272    160    
16     -64    
-176   -128   
32     48     
96     112    
0      64     
-192   -48    
32     16     
-496   -816   
112    512    
-272   576    
-352   -512   
-800   -80    
-160   480    
-96    -80    
-256   -256   
64     -256   
48     -16    
48     208    
64     64     
48     0      
-64    80     
-112   80     
-48    -160   
96     -112   
272    160    
0      80     
-320   80     
96     144    
-160   -80    
112    272    
-16    -112   
-80    496    
160    -112   
-608   -464   
208    352    
-192   320    
-80    80     
-112   -256   
16     128    
-160   -176   
0      0      
-608   -80    
-80    -80    
-160   208    
256    -48    
-176   -48    
96     112    
80     -144   
80     352    
-176   16     
0      -192   
-160   -480   
-288   -176   
-16    112    
-272   48     
-16    96     
-240   -64    
160    -320   
-368   272    
-96    -128   
96     176    
224    160    
-64    -32    
240    64     
432    224    
-416   -672   
480    352    
-256   624    
272    -496   
-80    176    
224    352    
-272   16     
-48    -352   
48     -480   
-128   320    
-48    -80    
96     -288   
192    320    
-128   720    
192    -352   
-272   16     
48     32     
32     48     
32     144    
-192   -160   
368    112    
-224   0      
48     160    
160    0      
-112   16     
32     -176   
256    544    
-48    288    
-192   -32    
-160   -368   
-48    -592   
240    480    
-160   416    
-80    -144   
80     -192   
-176   272    
-288   -176   
48     -240   
160    416    
192    208    
-304   -912   
320    48     
-48    416    
-16    208    
112    -16    
-64    96     
96     -112   
0      400    
-144   656    
224    -64    
-528   -880   
0      -960   
96     208    
160    640    
-256   608    
496    -32    
-272   112    
80     48     
-144   48     
160    16     
-96    144    
64     48     
-128   -16    
48     80     
-96    -16    
48     128    
-256   128    
416    -80    
-256   -48    
32     -48    
-112   256    
-16    48     
-80    -32    
160    -32    
-144   80     
32     -16    
-16    240    
112    256    
32     -96    
-16    0      
128    -304   
-48    96     
48     160    
32     32     
128    32     
112    144    
224    240    
-144   -128   
-96    -112   
128    -32    
-64    0      
-208   -640   
112    496    
128    176    
-32    320    
32     448    
-32    -192   
-48    -560   
-48    -384   
32     -112   
-96    -448   
80     48     
80     32     
-32    112    
128    -16    
32     -176   
112    -80    
224    0      
-112   96     
-256   -656   
-96    -560   
352    128    
-128   64     
32     64     
48     64     
64     112    
144    128    
-48    48     
160    64     
64     192    
48     0      
144    16     
-16    -32    
96     16     
-80    32     
96     -96    
144    96     
16     -528   
80     64     
-240   128    
80     240    
16     -112   
160    144    
64     80     
-112   32     
64     0      
64     -32    
144    -32    
160    192    
112    -96    
256    -192   
-128   176    
192    -288   
-48    96     
64     80     
128    256    
-176   160    
208    176    
-272   -48    
176    192    
-192   -80    
128    144    
-112   128    
16     0      
16     96     
64     -208   
64     80     
0      -272   
208    64     
32     -864   
352    816    
272    160    
-176   -144   
0      32     
160    32     
240    48     
64     -96    
32     32     
-16    -16    
16     32     
80     -112   
144    160    
0      64     
80     224    
-96    -288   
160    400    
16     -1088  
-176   -176   
80     -128   
-32    -128   
-80    64     
48     112    
-16    80     
112    -96    
16     128    
96     16     
80     64     
-448   144    
384    240    
-240   -304   
-96    256    
-16    -80    
208    192    
0      0      
-112   96     
-16    0      
-32    -32    
80     64     
160    0      
64     0      
-80    64     
160    96     
64     -240   
-128   0      
160    -160   
-96    80     
96     -240   
96     224    
-128   -64    
-208   128    
256    -16    
-48    112    
160    64     
-16    -176   
128    -16    
48     -144   
48     96     
32     -144   
-48    -144   
112    -48    
48     144    
-64    -1760  
48     128    
80     -16    
0      128    
32     208    
160    144    
-80    304    
64     -128   
64     16     
32     -96    
-16    112    
-16    48     
32     80     
16     -48    
160    256    
-32    -160   
-96    -400   
368    480    
-288   16     
160    -64    
64     -64    
288    -528   
-80    -144   
64     -192   
-16    -176   
48     32     
64     -128   
96     128    
176    0      
80     -208   
-64    -80    
16     48     
80     32     
-16    -288   
80     -288   
-1040  -32    
-192   -176   
80     -208   
32     -128   
192    48     
-112   -480   
32     -96    
272    16     
-144   0      
128    -256   
-32    16     
224    0      
-96    -16    
-16    -320   
32     -176   
64     32     
144    32     
0      96     
224    -48    
-96    64     
-32    16     
80     -32    
0      -432   
-112   -32    
128    -176   
-16    -144   
80     -240   
-64    -112   
-208   -80    
32     -144   
-32    32     
-16    -416   
-1120  -272   
96     -336   
80     -80    
96     -256   
64     -32    
48     80     
288    -144   
144    256    
144    208    
-80    176    
0      64     
-96    -464   
192    -336   
-96    -80    
96     80     
64     16     
0      -96    
-160   -240   
112    96     
-64    192    
80     -400   
-112   -352   
64     -560   
192    288    
-128   64     
320    16     
-176   -112   
160    -128   
-272   368    
96     -128   
16     288    
-192   -112   
0      -96    
16     -272   
80     48     
64     -256   
64     160    
-16    0      
352    416    
-144   -48    
-128   -64    
-96    -80    
208    96     
-144   48     
32     -48    
-416   32     
224    -320   
-192   -464   
96     -160   
-160   -384   
272    272    
-160   176    
16     -576   
0      128    
0      144    
-192   -480   
432    32     
-176   400    
192    -336   
-48    32     
-272   80     
112    -160   
-128   144    
112    112    
-16    -64    
224    -48    
240    -64    
192    -400   
352    160    
-240   192    
464    -208   
64     240    
144    96     
64     -144   
288    128    
-128   -304   
272    192    
-336   -384   
448    112    
-624   496    
0      -624   
192    384    
-112   80     
32     -144   
-32    -32    
224    -16    
144    -16    
-64    -32    
0      80     
496    496    
-672   -336   
48     -96    
-48    112    
144    -208   
-128   208    
-1584  -208   
176    112    
208    -128   
-96    -304   
64     288    
-192   -128   
-256   -112   
112    32     
80     -400   
224    352    
-240   1008   
96     -832   
-128   -320   
-448   -240   
112    576    
16     416    
-16    -352   
-128   208    
-192   208    
-176   -16    
-112   160    
128    32     
-288   560    
-80    -192   
-1680  608    
-240   -368   
144    -544   
-144   192    
-112   -144   
-16    -544   
144    -176   
144    656    
-176   368    
-96    -352   
96     -112   
-144   64     
0      32     
-256   0      
-176   32     
-272   -112   
272    336    
-272   -528   
96     176    
-80    -336   
96     192    
112    -64    
-224   304    
192    0      
32     256    
-16    368    
160    -112   
-256   -112   
-16    -144   
192    32     
-128   208    
176    -96    
-544   -32    
192    112    
-48    -48    
48     160    
-32    -128   
192    880    
-112   32     
96     -224   
-160   272    
64     -16    
-96    128    
32     288    
96     160    
-208   288    
192    32     
-624   -80    
256    48     
-128   -48    
32     80     
48     16     
32     96     
32     16     
-192   -128   
-32    -496   
-80    -128   
-64    -48    
-208   -80    
208    112    
-176   -160   
-16    -64    
-336   -192   
32     32     
80     -96    
0      -32    
80     64     
-16    128    
80     64     
-304   -208   
160    -16    
320    192    
-32    128    
-160   -16    
112    32     
16     80     
-16    128    
-32    80     
112    160    
-432   96     
-48    32     
16     0      
-48    48     
-144   -176   
-32    0      
192    144    
-208   64     
80     16     
-112   -48    
48     64     
-144   160    
128    96     
-240   -48    
160    112    
-368   -128   
64     -32    
-144   -80    
400    32     
-272   96     
448    160    
-288   80     
-96    -48    
-16    -48    
16     0      
-48    0      
-112   -64    
16     96     
-272   -288   
0      -112   
-48    64     
-80    144    
16     64     
64     176    
16     64     
-32    64     
-80    64     
96     80     
-16    96     
-32    -64    
240    48     
-160   -96    
-16    48     
-16    176    
128    -160   
-80    48     
-64    -64    
96     -32    
32     -16    
32     -112   
224    160    
-80    192    
144    96     
32     128    
144    -64    
0      -144   
320    64     
0      -224   
-16    208    
96     80     
-96    -16    
112    48     
-224   128    
128    144    
-96    -128   
16     -32    
96     32     
0      240    
32     224    
-320   -64    
240    304    
-128   -80    
-224   32     
0      -16    
-208   0      
32     224    
-144   160    
16     176    
16     144    
0      144    
-240   0      
112    528    
-32    272    
-96    240    
-16    16     
96     0      
384    112    
144    560    
80     448    
96     144    
-112   224    
592    256    
16     128    
304    48     
304    128    
-288   16     
112    48     
176    176    
-48    32     
112    80     
0      256    
-208   80     
-48    64     
-96    -64    
160    -64    
-80    32     
336    336    
128    192    
-80    64     
112    -16    
-192   112    
144    160    
-16    160    
224    48     
-96    16     
-64    -64    
208    -128   
32     -336   
96     208    
208    224    
-160   80     
128    112    
96     128    
96     48     
-96    0      
160    128    
-16    96     
80     80     
-32    32     
48     -144   
208    144    
112    96     
32     16     
112    48     
80     -336   
-80    32     
80     144    
112    80     
64     128    
32     96     
112    112    
112    80     
-64    -160   
32     96     
-112   16     
-32    -32    
176    16     
112    64     
0      -96    
-160   -384   
272    144    
80     144    
-64    112    
-48    80     
16     48     
0      48     
160    208    
176    96     
-64    0      
32     -48    
-208   -112   
160    -64    
-224   -624   
304    -432   
-144   -256   
320    208    
-48    -1344  
0      80     
80     80     
320    96     
-16    32     
192    80     
-16    64     
112    128    
-192   -176   
112    -592   
160    32     
384    128    
-368   -416   
368    32     
-48    256    
192    -384   
-32    64     
96     -704   
-16    64     
48     16     
48     -144   
48     48     
16     192    
-32    -256   
-16    -256   
192    320    
-32    -192   
176    80     
-272   -656   
192    -176   
80     -128   
32     320    
-96    96     
224    -176   
-112   96     
0      16     
32     -16    
112    288    
-32    208    
80     -192   
0      64     
48     80     
96     832    
-208   -592   
-96    -1088  
16     -64    
224    624    
-112   48     
48     -64    
64     48     
0      96     
-32    -208   
-48    -224   
240    -48    
80     -16    
-16    128    
32     -80    
48     64     
32     -48    
96     112    
-32    16     
48     80     
32     -112   
112    -16    
-48    -160   
160    80     
0      -48    
144    -80    
448    -1616  
-272   -64    
48     -240   
-240   -96    
256    -720   
-160   -608   
400    528    
32     352    
240    400    
-48    144    
272    -544   
-48    112    
-128   64     
496    144    
-384   80     
-160   -288   
-48    -368   
16     -576   
336    -32    
-80    -640   
32     -352   
-48    32     
304    -400   
32     -896   
672    736    
-432   304    
-176   -592   
208    -304   
-64    -256   
-736   96     
-80    -560   
176    -32    
0      -224   
16     64     
112    80     
96     -32    
16     -240   
16     -192   
64     48     
-272   64     
-144   -464   
64     368    
-240   48     
48     32     
-480   -64    
-96    -336   
272    -272   
16     144    
144    -384   
80     -256   
64     -32    
-48    -96    
112    -256   
160    192    
-112   -320   
544    272    
-272   528    
160    -80    
-48    -16    
64     -16    
-192   192    
-1200  -400   
112    -80    
-64    0      
192    -256   
-16    528    
-48    -416   
64     48     
-16    -240   
64     256    
-48    -144   
0      32     
144    -128   
240    544    
-368   64     
48     -656   
-16    80     
128    96     
-240   -64    
-32    32     
464    288    
-352   -496   
-32    -192   
128    -528   
400    464    
-176   224    
192    144    
-160   -48    
32     -176   
-80    32     
-176   -176   
-256   -320   
128    -96    
-368   -208   
-176   -544   
192    -224   
-16    -592   
0      -128   
16     -976   
-128   -176   
-16    352    
48     288    
-128   144    
112    80     
-96    48     
16     48     
-160   -608   
160    16     
-48    -96    
-176   32     
16     224    
48     -160   
192    256    
-80    -224   
176    544    
-256   128    
96     208    
-368   0      
-16    96     
112    -16    
-112   -304   
-112   -304   
176    -576   
-160   -240   
208    -256   
-160   64     
288    -48    
32     80     
176    -208   
64     -192   
-48    64     
96     48     
-176   -64    
96     48     
-400   -112   
96     32     
-16    -80    
-48    -112   
304    80     
-16    96     
144    160    
0      -160   
48     -112   
-192   -320   
352    80     
-224   144    
-80    48     
-128   48     
-16    80     
-64    -64    
48     0      
64     -64    
48     112    
-112   64     
-80    128    
96     112    
-880   -192   
224    144    
-16    0      
-80    64     
192    -48    
-464   -96    
32     0      
-464   0      
-48    48     
96     80     
-48    48     
128    0      
-64    48     
-144   -160   
48     96     
144    -128   
0      -16    
-16    48     
-160   16     
80     -16    
-144   -16    
0      16     
-224   32     
32     64     
-1376  0      
48     96     
16     0      
-176   -16    
0      -160   
-96    144    
0      -144   
-64    16     
-192   -144   
80     -272   
-240   -400   
64     80     
128    496    
32     448    
-192   -240   
-64    -208   
-16    -192   
-96    -64    
-64    -16    
112    0      
-32    64     
80     -80    
-240   -16    
240    64     
-208   0      
16     80     
-16    -32    
112    96     
-160   32     
-64    128    
16     -48    
-32    32     
-192   128    
-144   48     
-80    -80    
224    16     
-48    96     
96     176    
16     144    
176    288    
-288   160    
48     144    
-288   48     
-384   -448   
384    224    
-240   48     
112    -96    
-480   -32    
144    112    
-16    -112   
-80    112    
128    128    
-96    80     
144    -16    
-320   -192   
96     208    
96     176    
-80    -16    
16     16     
96     32     
16     -48    
32     144    
-128   -96    
-16    128    
-16    96     
160    48     
-48    80     
16     32     
-16    32     
-176   96     
160    -16    
112    64     
224    272    
-208   -176   
-48    272    
176    -32    
-16    48     
0      64     
64     192    
-80    -80    
320    208    
-272   -32    
-48    64     
320    128    
144    32     
64     96     
0      -48    
64     48     
-336   -128   
16     -16    
-64    -32    
272    128    
-528   -144   
208    -32    
-80    48     
160    112    
-64    48     
16     80     
-16    32     
-16    -96    
128    96     
192    80     
-96    144    
-224   48     
48     64     
-64    16     
128    80     
-208   -48    
-48    -48    
160    -64    
-16    64     
48     80     
80     80     
80     80     
-160   0      
16     112    
144    16     
32     176    
-160   160    
-16    80     
176    192    
-32    16     
-160   48     
48     32     
-32    -64    
-48    -80    
192    64     
-64    64     
0      80     
-32    32     
112    64     
0      624    
-128   112    
240    432    
160    272    
-176   -240   
112    176    
-144   -96    
176    240    
-32    464    
80     160    
128    -176   
-144   -96    
352    336    
-224   656    
128    -416   
32     96     
80     224    
-32    -48    
16     80     
176    32     
-304   112    
208    80     
-32    96     
-16    -16    
64     64     
48     144    
-64    -32    
64     -128   
64     96     
-96    176    
-96    -368   
224    240    
-112   192    
48     128    
80     -32    
48     144    
-128   -48    
-112   -624   
160    96     
-96    -32    
-144   -48    
208    -80    
-32    -128   
144    80     
0      32     
-64    16     
160    224    
-176   48     
112    -128   
-192   32     
112    -48    
96     32     
32     256    
176    -32    
16     32     
16     48     
-208   -368   
192    -64    
64     272    
-112   160    
-96    -416   
48     368    
16     384    
144    144    
-80    -80    
32     -112   
96     176    
-16    -64    
128    80     
-32    80     
240    160    
-80    16     
160    160    
-80    0      
-16    128    
80     64     
160    112    
-240   -144   
96     -16    
-32    144    
352    352    
-144   240    
-16    -1424  
-16    192    
160    160    
-176   128    
0      176    
-32    -64    
64     -128   
896    960    
-640   624    
-208   -464   
-80    -608   
-48    -160   
-160   -608   
32     -176   
128    80     
0      -80    
32     384    
-112   128    
32     672    
-288   -64    
80     -128   
96     96     
-160   64     
-144   -96    
224    544    
-240   416    
-272   -160   
288    -288   
-144   -272   
304    1136   
-144   -288   
16     -160   
0      -176   
0      16     
240    16     
144    96     
-240   -48    
-160   -544   
48     -864   
160    144    
176    816    
-16    96     
32     -160   
32     16     
336    112    
240    560    
64     384    
64     48     
144    0      
-240   -1952  
336    -16    
-160   416    
304    336    
-128   80     
80     -80    
160    80     
96     288    
352    224    
-304   -624   
16     -112   
96     -144   
48     -128   
-80    -608   
-32    48     
-224   -16    
256    80     
48     16     
368    384    
0      464    
-160   224    
96     192    
-32    -16    
160    64     
48     48     
128    64     
64     -304   
32     16     
-112   -304   
96     48     
-112   -416   
-32    -304   
128    -32    
-32    128    
-240   -224   
256    -48    
144    160    
48     -112   
-16    48     
-80    -304   
96     -48    
64     -224   
80     64     
16     -64    
96     64     
144    -64    
112    -272   
48     -144   
-160   -640   
224    -192   
128    144    
-48    -272   
16     -16    
256    -1296  
-144   224    
64     80     
96     -96    
32     -48    
224    0      
112    160    
48     -96    
144    -32    
80     176    
-64    48     
48     -208   
-192   -80    
144    -128   
112    -48    
96     -448   
96     144    
128    0      
-128   32     
176    144    
16     -48    
48     -208   
64     -80    
-48    -80    
112    160    
48     -112   
48     -400   
-464   -32    
272    -224   
-128   -48    
64     -80    
0      -48    
32     -800   
-112   -256   
64     400    
48     32     
16     -64    
-208   16     
96     16     
0      96     
-144   -16    
-64    32     
-80    -80    
96     80     
-32    64     
-96    -64    
208    -96    
48     -160   
80     -48    
-80    -752   
-32    80     
240    160    
-176   240    
-64    -64    
16     192    
112    -16    
-176   -16    
-32    64     
64     0      
-896   -64    
16     -192   
-16    -272   
96     -176   
-80    96     
16     -256   
32     80     
208    -288   
-48    48     
16     48     
192    -16    
-48    -32    
32     64     
-224   -96    
96     -176   
-1184  -80    
128    384    
64     0      
112    -128   
96     -16    
112    -496   
-32    16     
96     -528   
272    128    
-144   -32    
64     16     
-208   -64    
304    32     
-368   0      
112    -16    
-64    -80    
16     -160   
-496   48     
256    32     
-144   16     
176    -400   
160    304    
-64    -128   
0      112    
32     80     
16     -96    
96     64     
64     -48    
-80    16     
-208   -176   
336    0      
-32    0      
0      208    
-48    -112   
48     -32    
192    -144   
112    160    
144    80     
16     -304   
-80    -48    
16     -160   
96     96     
-160   -32    
96     48     
-112   16     
-32    -96    
-144   -320   
208    -128   
80     -128   
96     80     
192    -112   
-272   256    
128    -640   
-16    48     
32     32     
0      -32    
-96    16     
80     80     
-16    48     
-96    -32    
-208   -48    
0      480    
32     256    
16     0      
64     -16    
-464   -240   
176    0      
-592   -256   
-976   48     
-128   48     
-816   -16    
16     80     
368    48     
-64    64     
-16    -80    
-32    80     
176    48     
-96    -16    
-512   -32    
192    -80    
-48    -432   
272    240    
16     0      
-112   -16    
112    96     
-96    112    
-528   -64    
-560   176    
-448   -80    
256    96     
-96    32     
-256   32     
96     32     
-384   -240   
-48    -48    
-144   -96    
288    112    
112    176    
-32    304    
-64    48     
-16    -96    
-80    -128   
-192   -16    
160    16     
-384   112    
0      48     
16     -128   
-64    176    
16     0      
-224   32     
32     -128   
-48    96     
-16    48     
-128   16     
-32    0      
-96    0      
-48    112    
64     64     
-224   32     
-816   16     
-256   48     
-16    -16    
160    -64    
48     -272   
128    -256   
-144   176    
96     288    
-48    16     
-96    -256   
32     16     
48     96     
-80    -336   
0      192    
-128   48     
0      48     
-112   -32    
-976   0      
-64    -64    
-80    -208   
256    -80    
-112   256    
32     -16    
64     32     
112    64     
32     48     
240    224    
-368   16     
16     -128   
-16    192    
-16    304    
32     -48    
-160   96     
96     288    
48     64     
-160   -128   
64     112    
-32    48     
144    96     
-144   -48    
0      16     
-144   0      
48     144    
-32    0      
32     64     
-64    0      
-32    80     
-432   80     
-64    48     
64     -192   
-256   64     
224    -48    
-240   16     
48     112    
-32    48     
-32    176    
-144   -80    
128    -96    
16     96     
-32    -16    
-192   -208   
0      112    
-160   -96    
-48    32     
-368   -64    
16     48     
64     96     
80     160    
80     416    
-224   80     
400    192    
-320   272    
128    96     
-176   -240   
160    16     
-64    -64    
16     128    
144    144    
16     160    
80     64     
-544   -1024  
336    -192   
-112   -64    
112    -144   
-144   32     
144    64     
-80    160    
128    208    
-176   -48    
0      96     
-32    -80    
112    192    
-48    -64    
-64    96     
176    48     
-208   32     
112    96     
-32    112    
32     -48    
48     368    
208    368    
-224   416    
128    160    
-64    -128   
96     96     
-176   -208   
-32    224    
-224   -112   
176    16     
512    688    
-720   -160   
48     -1120  
48     688    
-48    224    
-16    -240   
32     448    
-48    -32    
-112   80     
128    -96    
-96    -384   
-176   176    
112    272    
80     96     
48     128    
160    384    
-64    208    
-256   -288   
208    -240   
320    320    
-160   -16    
80     0      
-208   -144   
128    -192   
-224   -160   
144    -176   
-64    -32    
144    48     
-96    64     
160    128    
96     320    
96     320    
-496   -480   
48     -432   
-128   -16    
96     0      
-208   -320   
-128   -96    
80     128    
-48    -48    
-160   48     
144    -112   
-128   -672   
288    -368   
-112   240    
320    144    
-160   48     
80     96     
32     304    
512    224    
-448   240    
576    448    
-848   -112   
208    32     
16     112    
80     96     
-496   -96    
352    -704   
16     224    
48     -128   
-208   -32    
544    -16    
-64    304    
144    96     
0      96     
208    32     
0      96     
0      32     
32     80     
-32    -176   
64     64     
48     48     
48     -416   
320    160    
-304   128    
144    112    
-16    -32    
192    -144   
48     128    
192    112    
-176   -32    
368    256    
-464   144    
240    96     
-192   -80    
144    64     
0      112    
-128   -608   
176    64     
-32    -640   
-144   -96    
208    -16    
-80    64     
176    16     
96     128    
128    240    
-48    160    
-96    32     
112    -16    
112    64     
80     -48    
-32    96     
176    48     
96     80     
-32    -384   
96     128    
112    16     
64     112    
-16    32     
208    64     
0      -224   
48     -48    
0      -16    
-48    176    
32     -32    
-16    64     
192    96     
-48    -112   
128    272    
-48    -608   
-80    80     
176    -416   
-96    96     
144    64     
-48    112    
0      -16    
-32    320    
192    112    
-192   48     
16     64     
144    -64    
32     64     
-80    -176   
208    80     
-64    -112   
0      -224   
64     -544   
176    96     
-64    -752   
-64    96     
96     208    
176    96     
-176   16     
256    144    
-32    -64    
-32    -96    
96     -32    
32     -400   
80     64     
128    240    
-16    176    
16     -272   
80     112    
32     -272   
144    192    
-16    64     
80     112    
-80    -16    
128    336    
80     80     
64     -128   
160    80     
32     16     
0      0      
176    -144   
-16    48     
0      -128   
176    48     
-16    -784   
240    272    
-240   64     
208    64     
-96    96     
80     -160   
-48    176    
192    48     
80     128    
-16    -160   
48     96     
48     -208   
48     64     
80     -80    
-48    80     
80     112    
112    -1280  
80     -32    
32     160    
48     -960   
32     128    
-16    -368   
192    -160   
208    -2144  
16     -48    
-32    16     
0      -160   
192    16     
16     -96    
80     -480   
16     64     
-144   96     
144    128    
-64    128    
112    -256   
-288   -144   
48     -528   
240    144    
-176   -400   
144    0      
-128   -192   
240    -32    
64     176    
96     -304   
64     -656   
32     64     
64     -32    
240    272    
-240   256    
32     16     
-432   -16    
32     -160   
208    128    
112    0      
16     0      
144    -112   
32     -32    
48     -1472  
80     160    
160    16     
-16    96     
-144   0      
496    208    
48     -80    
384    128    
-384   272    
192    128    
-240   48     
-32    -16    
272    -192   
-128   -448   
336    -112   
-128   -32    
288    112    
-80    80     
112    32     
-32    -128   
128    -208   
144    128    
-128   128    
-240   32     
-48    -192   
352    80     
112    -144   
-32    48     
16     -192   
48     0      
240    -176   
-32    -80    
128    -432   
112    176    
96     -96    
-288   80     
96     -16    
32     160    
-128   -112   
48     -64    
304    48     
-192   48     
-256   48     
48     -320   
128    -448   
112    -480   
160    48     
112    64     
-48    96     
144    80     
80     272    
-128   -64    
-32    -112   
64     -176   
-32    -240   
-320   256    
80     -96    
-112   -128   
80     0      
-160   -416   
64     64     
272    208    
-80    -704   
48     48     
-64    0      
160    -160   
-16    -96    
48     -112   
-48    80     
112    320    
-416   -432   
208    32     
-16    560    
32     -160   
192    -336   
-128   -96    
80     192    
-16    -240   
240    -32    
64     80     
0      208    
80     192    
-112   -64    
32     -144   
32     -112   
-96    32     
64     48     
-208   -64    
16     0      
128    80     
160    16     
-80    288    
64     -384   
-208   -320   
64     -144   
112    208    
-112   128    
-16    64     
80     16     
32     -64    
-64    80     
144    -64    
80     32     
-48    -32    
160    112    
-688   -176   
32     64     
-176   -32    
-480   -16    
144    80     
-320   416    
128    400    
-1472  304    
-112   80     
64     -80    
-112   -32    
96     -80    
-48    128    
-176   -176   
-48    -80    
-80    -272   
32     144    
-208   -32    
16     112    
-64    64     
-160   16     
-192   16     
-512   -96    
-80    16     
64     176    
-32    64     
80     32     
48     192    
32     368    
32     640    
-128   -224   
-112   -96    
-64    -16    
-144   -48    
0      48     
-144   0      
48     416    
192    912    
-224   1392   
144    784    
-208   528    
32     -144   
0      -208   
-16    -272   
64     112    
-32    80     
48     64     
-96    -112   
-256   64     
352    576    
-592   -784   
64     -128   
-48    160    
48     64     
-224   144    
-144   32     
-272   -1008  
432    -288   
-16    928    
16     -224   
-96    -96    
128    208    
80     256    
-32    112    
-80    -272   
192    512    
-176   240    
-128   0      
32     -240   
-720   -304   
208    464    
-752   96     
-16    -80    
64     -288   
48     -144   
64     144    
-32    160    
96     96     
0      96     
32     576    
96     304    
-144   32     
16     64     
96     64     
-240   -80    
80     80     
-480   240    
0      80     
-48    176    
64     0      
16     -32    
80     80     
176    336    
-272   160    
-112   32     
64     -32    
224    64     
-400   -352   
288    -656   
-336   -432   
528    320    
-544   80     
160    160    
-336   -80    
144    224    
224    288    
-160   32     
208    -48    
-96    128    
240    176    
-112   96     
32     32     
128    128    
80     96     
-128   -48    
16     176    
-16    -48    
0      16     
400    400    
240    176    
-176   32     
48     16     
80     32     
-176   96     
-192   -272   
752    16     
-496   80     
384    -224   
-272   160    
256    0      
-320   96     
48     48     
48     0      
-48    -16    
0      32     
256    256    
-128   -32    
96     80     
-32    -96    
240    112    
-192   -32    
-48    32     
48     -80    
-144   80     
64     -48    
64     144    
-96    32     
-48    80     
144    -32    
-80    64     
32     96     
208    112    
-160   80     
256    128    
-144   176    
-176   -32    
64     176    
32     -64    
0      96     
-48    32     
16     112    
-32    48     
-32    80     
64     224    
32     80     
16     80     
32     -16    
96     96     
-96    -64    
80     32     
224    48     
96     128    
48     48     
80     64     
-256   -96    
128    208    
-320   -96    
272    144    
-160   -64    
160    96     
48     16     
-48    16     
80     32     
-80    -64    
80     96     
0      176    
-16    64     
48     -48    
64     128    
-16    0      
0      -304   
-16    96     
192    224    
192    128    
32     112    
16     96     
-16    128    
336    272    
32     160    
-96    32     
80     48     
240    192    
-224   80     
128    48     
-224   0      
0      -128   
192    -16    
32     80     
-64    240    
48     96     
48     48     
256    160    
16     288    
0      96     
64     80     
-112   -32    
64     16     
144    160    
-128   112    
-112   0      
96     -1264  
-64    16     
96     80     
80     256    
-64    80     
80     80     
0      -64    
80     16     
-112   32     
16     48     
32     64     
64     64     
-80    128    
80     64     
-32    48     
80     -144   
-64    64     
256    208    
32     128    
0      144    
-144   -48    
144    80     
-64    16     
32     112    
96     80     
96     80     
80     48     
-144   64     
160    96     
48     48     
-16    -208   
80     64     
256    -192   
-16    144    
144    208    
-240   80     
112    176    
0      240    
0      -64    
112    112    
16     -112   
0      112    
-32    16     
-208   -480   
192    -256   
400    0      
-32    208    
96     -240   
-96    -128   
400    368    
-96    416    
-16    368    
32     80     
96     32     
112    32     
-32    192    
-48    -192   
32     176    
32     64     
-32    112    
-80    -352   
0      -160   
400    -208   
-176   144    
80     -560   
80     -64    
272    160    
176    592    
128    448    
-16    64     
64     128    
80     112    
80     128    
-16    32     
-96    -96    
160    -160   
-96    -160   
80     -128   
-48    -176   
288    -112   
-80    112    
-64    -64    
272    528    
192    448    
64     256    
64     176    
-208   -112   
192    96     
32     32     
64     32     
0      -160   
0      -80    
16     -448   
-32    -448   
240    -704   
128    288    
352    576    
-16    352    
32     64     
96     32     
-208   -272   
208    -592   
96     -192   
32     -368   
272    224    
80     128    
128    176    
-128   -192   
256    48     
-80    -160   
16     256    
112    -160   
-240   192    
144    -528   
-176   64     
160    624    
144    -480   
-112   448    
48     -176   
160    64     
0      64     
48     -256   
-80    -176   
240    336    
352    336    
-416   -240   
32     448    
160    -2064  
-176   80     
224    -864   
-96    -336   
176    -32    
-64    -576   
176    -64    
144    -1136  
-112   -128   
-32    96     
160    0      
16     144    
64     -160   
64     -400   
-96    0      
160    -480   
-176   -16    
-32    -496   
16     -432   
368    320    
-16    -64    
160    464    
112    -624   
96     -64    
-80    -32    
96     -224   
112    -272   
-16    -64    
288    -160   
-176   96     
144    0      
-16    16     
96     48     
128    -176   
64     112    
64     16     
-32    -96    
160    -144   
32     464    
288    160    
-64    96     
32     -64    
-160   -192   
160    96     
-16    48     
0      32     
0      -160   
-80    -48    
32     -144   
-480   -16    
64     0      
48     -32    
48     16     
64     -32    
128    -352   
-160   176    
224    -1376  
48     592    
-304   -352   
-128   -480   
160    -256   
48     -144   
-48    16     
112    48     
-208   -16    
112    -368   
-592   128    
-16    -80    
176    48     
-64    -432   
240    432    
-48    352    
32     -496   
224    -192   
-32    592    
-160   -144   
176    96     
-288   288    
48     -80    
32     -96    
-80    320    
-112   -160   
0      -272   
-240   336    
-48    224    
336    128    
16     -336   
-64    -16    
352    -832   
-80    384    
128    240    
32     -608   
-64    48     
80     80     
-304   -16    
-16    -400   
-400   -112   
112    160    
-560   208    
-288   -1376  
80     16     
208    -176   
-176   464    
336    -304   
-128   -208   
128    -32    
-96    576    
-48    352    
96     48     
-320   144    
0      0      
-128   16     
224    80     
48     128    
96     16     
176    -16    
-32    -144   
304    432    
192    96     
-16    -80    
-384   112    
0      -128   
64     -48    
-48    -112   
144    128    
144    128    
-96    96     
80     -32    
176    -144   
64     -16    
96     96     
96     -192   
-112   16     
64     -80    
-1008  -128   
-144   -64    
224    48     
-16    224    
-80    -304   
128    96     
-48    0      
-48    -128   
-48    16     
-96    48     
-672   -48    
-96    -32    
-288   -80    
-48    48     
-272   -864   
-16    -208   
-160   48     
-32    144    
-160   224    
-688   48     
-160   16     
-32    -32    
-208   -32    
32     -80    
16     112    
-64    -128   
64     256    
-128   -16    
-64    176    
-16    144    
-32    -48    
208    416    
-16    0      
-208   -160   
-448   -32    
-112   -144   
288    -32    
-272   48     
112    0      
-128   32     
-64    32     
80     352    
-288   -144   
384    160    
-336   128    
304    128    
-128   0      
96     -112   
-160   -48    
-400   -224   
128    -384   
-1040  -208   
32     -144   
32     -208   
16     112    
80     160    
208    208    
-96    176    
0      0      
288    144    
-464   16     
32     -64    
-96    32     
-16    -160   
-16    0      
16     128    
-304   -64    
-48    112    
-80    -112   
48     48     
80     32     
0      176    
-16    16     
-144   48     
64     64     
-32    48     
0      64     
0      0      
48     -96    
-224   -224   
-32    -80    
-416   64     
112    160    
-992   -48    
112    160    
-192   -48    
-32    64     
112    64     
-208   16     
32     -80    
-80    32     
96     64     
112    272    
-352   0      
128    80     
-112   16     
-32    -16    
96     64     
-112   0      
-32    -144   
-96    -160   
-16    96     
192    80     
0      0      
128    96     
32     128    
80     32     
-64    16     
80     32     
48     96     
48     32     
0      -64    
336    368    
-464   96     
80     80     
224    176    
0      64     
-192   -96    
48     -64    
240    -96    
-160   128    
-64    32     
-16    144    
32     176    
160    256    
-128   112    
-112   -80    
48     0      
-128   0      
32     112    
48     112    
16     48     
96     0      
-32    96     
16     32     
-48    64     
-32    0      
48     64     
48     16     
-160   -64    
64     48     
-352   -256   
32     -48    
80     -32    
-48    160    
-80    64     
16     32     
48     -64    
0      0      
112    80     
0      128    
-16    144    
144    80     
32     64     
-144   144    
160    80     
-160   -32    
64     192    
48     352    
16     112    
32     48     
-240   0      
208    -112   
-32    -16    
80     -160   
-48    48     
112    64     
-224   -32    
144    -160   
-128   -112   
384    128    
-416   0      
272    32     
-240   -432   
32     -80    
208    144    
-80    208    
96     16     
0      -48    
0      -16    
-112   32     
-16    128    
128    -176   
272    304    
-320   -544   
224    80     
-96    320    
176    112    
-96    -192   
-16    -80    
48     -128   
160    176    
176    -256   
208    208    
-16    160    
96     -48    
192    192    
-112   0      
64     48     
48     192    
0      96     
-224   -208   
144    -112   
160    272    
80     224    
80     0      
-32    16     
48     112    
32     -112   
96     80     
-96    0      
80     160    
288    480    
-48    256    
0      -128   
64     48     
96     96     
144    -672   
160    208    
112    384    
-304   -16    
-144   -720   
144    -192   
208    624    
-112   -32    
32     80     
144    16     
-464   -176   
80     208    
112    -80    
-96    560    
288    -16    
-16    560    
192    -272   
16     16     
96     -16    
0      416    
0      -224   
64     -176   
64     528    
32     -160   
-256   -608   
384    384    
48     480    
96     -256   
-240   192    
160    64     
-32    -224   
-416   -64    
624    0      
-288   -272   
480    -32    
-192   64     
96     -96    
144    192    
-16    512    
-48    -416   
224    160    
-160   112    
48     16     
32     -320   
-96    -592   
-48    208    
-16    96     
0      -1072  
-64    736    
160    144    
-112   16     
-16    112    
16     16     
80     144    
48     96     
-96    -16    
144    96     
-96    32     
0      -112   
32     224    
160    -464   
32     -128   
-224   -528   
48     -144   
-112   -144   
-16    -96    
128    176    
48     304    
-32    16     
80     128    
64     -144   
144    64     
-160   176    
48     -416   
192    -144   
80     64     
-224   -48    
176    16     
-16    192    
64     -384   
400    576    
-464   -288   
80     -400   
80     -208   
-160   384    
384    352    
-160   368    
128    -80    
304    192    
-112   288    
144    -304   
-176   64     
304    -288   
-128   112    
80     -48    
80     96     
16     -736   
48     96     
16     64     
-96    -112   
160    -272   
-128   16     
288    480    
-32    -144   
128    368    
-112   -368   
176    224    
-16    -80    
112    96     
-32    -464   
48     -160   
160    272    
64     96     
-80    -176   
96     32     
-272   -592   
32     -208   
144    224    
-80    0      
160    208    
128    160    
112    32     
48     -176   
-48    -80    
96     -400   
80     112    
-32    -112   
112    -128   
288    160    
-160   -1328  
80     -288   
432    112    
-144   -96    
592    288    
-352   432    
64     -48    
-16    -48    
112    -144   
128    96     
-80    -224   
176    -160   
0      -80    
64     -192   
160    160    
-64    -1168  
48     -224   
112    48     
192    32     
-96    64     
64     -576   
48     -128   
224    272    
-176   16     
80     192    
-352   -192   
352    -464   
32     16     
-32    -304   
16     80     
32     0      
0      -352   
272    -480   
112    -64    
80     -16    
-176   -928   
192    256    
-32    -480   
-32    -16    
176    -96    
80     -80    
48     0      
80     160    
-208   -16    
112    -48    
-224   80     
128    -176   
-432   -80    
0      -192   
32     112    
-80    -336   
-16    0      
240    -160   
-64    -208   
32     -1824  
400    -32    
-16    -128   
112    64     
96     -48    
112    32     
-192   -80    
128    -32    
-176   -16    
96     16     
-208   -368   
480    -240   
-224   -352   
304    80     
-352   -32    
-96    -688   
48     192    
144    608    
192    -16    
64     -112   
-176   -80    
-368   -128   
16     -240   
176    32     
96     -32    
-416   -64    
96     -64    
-128   -96    
96     -144   
128    -80    
144    -272   
48     -176   
16     -144   
16     -64    
0      48     
-144   -128   
-96    -32    
192    48     
-240   128    
96     -32    
-512   80     
-80    0      
-528   112    
-16    -80    
176    48     
-80    -240   
48     -32    
-96    -400   
144    224    
-240   80     
48     0      
176    320    
16     -128   
16     32     
-16    -32    
-272   -112   
208    -48    
-288   96     
160    -96    
-112   48     
192    -304   
-96    16     
112    -32    
32     48     
160    -48    
64     0      
-272   32     
176    -48    
-192   96     
-96    -128   
-96    144    
160    -48    
-144   64     
112    -192   
-16    80     
-32    -272   
-80    32     
-64    -16    
112    -48    
-288   160    
-224   -64    
-304   -80    
256    0      
-96    0      
128    -16    
-144   64     
160    -16    
-480   -80    
80     -240   
96     96     
128    -80    
160    144    
-192   16     
128    96     
-208   0      
-16    -32    
-16    32     
80     32     
64     16     
-80    -80    
16     64     
-128   -16    
0      96     
-896   -176   
96     64     
-176   -112   
-240   -112   
-112   48     
64     -32    
-128   16     
112    96     
-32    112    
-1536  48     
-64    16     
176    -16    
-272   176    
-128   -304   
-64    -176   
320    -16    
80     96     
-96    -144   
-144   16     
-48    0      
48     -224   
-32    -80    
144    -96    
-272   160    
-336   -192   
-256   -192   
144    32     
-64    -192   
32     -272   
-64    32     
-96    -128   
96     272    
-224   -80    
0      -480   
-16    -176   
208    224    
-208   -96    
96     528    
-80    -176   
-288   -144   
112    192    
-208   -112   
32     144    
-304   -336   
48     304    
-32    -16    
-32    128    
112    224    
64     288    
80     144    
64     192    
-80    0      
32     -64    
-32    112    
-16    32     
0      448    
-768   -432   
32     32     
-240   -48    
192    48     
-48    -16    
-64    48     
48     80     
-112   -16    
-96    -32    
48     16     
-240   -464   
320    192    
-48    464    
-96    -192   
-32    -64    
-256   -48    
128    464    
-1248  -32    
0      -240   
256    -192   
-48    512    
-128   -112   
192    -272   
-32    144    
-16    192    
96     208    
-48    48     
176    384    
-160   208    
-256   16     
128    -480   
96     80     
0      224    
-80    -128   
160    112    
416    528    
-368   -64    
-192   -32    
256    -32    
-192   48     
-288   -592   
-96    0      
400    624    
-432   32     
160    -80    
-96    304    
16     -64    
-768   -176   
336    -48    
-144   64     
32     176    
-16    96     
272    0      
112    304    
-176   -48    
16     0      
32     192    
-16    -208   
64     80     
384    624    
-688   -976   
304    80     
-192   384    
16     192    
-96    -368   
48     32     
16     80     
-96    128    
-16    208    
-272   -272   
96     -1040  
288    672    
288    160    
-544   -48    
48     -560   
32     -32    
-48    64     
192    336    
0      560    
-416   -1040  
352    -304   
0      448    
128    112    
176    96     
-64    64     
288    320    
-32    288    
-96    256    
-352   -624   
288    224    
-192   448    
-48    32     
176    -48    
-112   -176   
16     0      
48     -352   
160    240    
-48    -224   
128    -96    
-64    128    
160    80     
-96    112    
0      144    
32     112    
16     320    
-288   -96    
160    464    
112    -384   
-48    176    
-96    352    
-80    16     
144    448    
-32    272    
-32    96     
-64    32     
64     608    
-112   -96    
-128   -160   
64     272    
-48    -32    
-64    -96    
96     288    
-240   -64    
144    -80    
-16    400    
176    272    
-32    368    
-112   -128   
-96    -528   
224    272    
128    352    
-64    160    
224    112    
-144   -112   
-32    -144   
-16    368    
-112   -208   
-64    -128   
96     160    
48     176    
112    432    
-192   -32    
-32    -64    
336    208    
-208   96     
32     0      
-80    128    
-80    32     
0      64     
-80    32     
96     160    
-112   -480   
96     80     
-48    64     
64     32     
112    -128   
-96    -144   
96     -128   
-128   -480   
0      -272   
192    -32    
-48    16     
0      0      
64     -32    
176    208    
-32    80     
64     -448   
0      -64    
32     -176   
160    80     
64     96     
-16    64     
128    208    
-48    112    
-80    144    
128    -16    
-96    -144   
48     0      
-128   -16    
-32    -240   
176    80     
-64    -1056  
-64    48     
160    32     
16     128    
96     80     
0      128    
32     112    
32     64     
64     192    
192    240    
-224   16     
208    80     
80     128    
32     -96    
32     112    
128    -272   
-16    32     
-48    -1040  
160    48     
-16    64     
64     64     
-48    96     
112    -16    
48     96     
32     112    
256    320    
0      368    
-144   240    
128    -320   
48     -272   
256    32     
-256   16     
352    -208   
-240   144    
288    -352   
-304   192    
80     -128   
-64    128    
112    64     
-80    288    
-80    128    
-48    48     
0      96     
-112   128    
352    400    
-96    112    
240    64     
-48    -496   
64     96     
112    -64    
-144   16     
288    112    
-64    224    
160    -80    
-144   128    
144    144    
48     48     
-256   -256   
256    -352   
256    256    
112    -256   
-32    128    
64     -144   
0      144    
112    16     
208    272    
48     -96    
80     176    
128    624    
336    -48    
-176   -112   
272    -544   
-48    -96    
-96    -352   
144    48     
-16    -144   
16     -48    
48     96     
96     96     
-144   -448   
128    176    
112    48     
144    96     
112    48     
320    464    
-304   96     
320    -96    
-240   96     
80     -368   
-80    32     
240    -16    
-144   -80    
288    -224   
-144   96     
528    -144   
-272   128    
352    112    
-16    160    
-208   128    
112    -1504  
-32    -1120  
160    -192   
-64    -144   
-144   -112   
176    -176   
-16    -208   
96     80     
288    16     
-288   176    
64     32     
80     -96    
80     80     
-16    -192   
-96    176    
-224   -160   
-80    -208   
256    144    
-128   -272   
-32    -16    
32     -752   
80     -64    
112    48     
0      -80    
240    128    
-16    80     
304    0      
-160   -96    
192    -32    
-96    80     
-112   16     
96     -80    
32     -32    
64     96     
160    64     
96     16     
-32    -176   
-80    -512   
256    128    
144    240    
-112   48     
-80    -144   
96     -48    
192    16     
320    416    
-224   160    
0      96     
-768   -128   
112    112    
32     -192   
32     -160   
352    432    
176    -32    
-64    0      
16     208    
160    320    
208    144    
128    128    
192    368    
-48    48     
-96    -64    
80     -80    
-32    -80    
96     96     
32     -48    
128    -128   
112    32     
32     -224   
0      -32    
64     -1312  
64     64     
-16    64     
48     112    
16     224    
112    -224   
-144   -176   
-32    16     
-64    -208   
-48    -112   
-624   432    
-112   -752   
416    16     
-64    320    
48     -112   
-96    -512   
144    208    
-64    -48    
144    320    
-240   -304   
48     -80    
-80    96     
208    48     
-272   -96    
176    -64    
-208   128    
96     0      
-1264  -160   
128    -304   
176    112    
32     -48    
112    -16    
64     -160   
208    -48    
-112   160    
16     -96    
64     -144   
144    400    
-224   -96    
-144   -464   
-176   -304   
144    -64    
48     -16    
128    -80    
-112   80     
256    -224   
-128   96     
160    -1488  
-48    -160   
-96    64     
96     32     
-240   -80    
0      -80    
-400   -48    
80     16     
-16    64     
96     48     
96     0      
16     -128   
-80    -208   
160    -208   
48     128    
-48    128    
112    160    
-16    128    
144    112    
-64    16     
192    464    
0      368    
192    96     
-16    208    
-32    -416   
-176   -96    
-400   -384   
608    -256   
-1008  -128   
304    -112   
336    288    
-1504  176    
-112   -464   
-752   176    
320    432    
-64    160    
240    544    
256    672    
-48    48     
192    -528   
256    944    
-240   -496   
-16    176    
-176   -240   
-832   -624   
48     -64    
-336   576    
-48    -96    
-512   -16    
48     -80    
-1040  -224   
-384   -144   
208    112    
-160   32     
176    -208   
-112   -208   
32     384    
-96    192    
-272   -480   
-128   384    
-96    384    
192    400    
-272   -240   
-64    -32    
-80    112    
-752   -160   
16     -288   
96     80     
-272   96     
-16    -32    
160    400    
-80    64     
-176   64     
-192   -64    
-64    0      
32     144    
16     64     
144    976    
144    384    
-688   -592   
-224   208    
368    880    
-1232  -64    
0      -304   
-288   -592   
16     0      
64     -80    
-176   -144   
0      -272   
-224   -64    
512    512    
-304   416    
-64    0      
-224   -288   
112    -240   
-96    -48    
256    -32    
-256   -96    
96     80     
-224   -272   
304    128    
-128   0      
96     208    
0      96     
-48    80     
-48    80     
112    112    
-64    160    
96     160    
16     224    
64     64     
176    192    
-384   -96    
160    96     
-624   -16    
144    176    
208    -32    
-16    -176   
192    240    
-208   48     
112    224    
-208   368    
16     240    
-144   16     
96     0      
-112   -112   
48     16     
-16    -32    
-128   -128   
384    624    
-368   432    
80     80     
-160   -16    
176    48     
-32    16     
0      48     
0      32     
-80    -240   
-288   -112   
160    16     
-352   -160   
96     -160   
-192   64     
336    -16    
-992   -512   
112    -832   
-112   -16    
224    80     
32     0      
32     80     
-32    192    
16     -32    
64     128    
16     96     
288    368    
-416   400    
112    288    
-432   -336   
192    128    
128    368    
-528   16     
-128   -144   
272    80     
112    128    
-224   16     
32     160    
-96    96     
64     192    
-48    16     
160    176    
-288   -16    
64     112    
-176   0      
48     16     
-144   -32    
0      48     
96     32     
64     48     
-48    16     
16     32     
64     -64    
-48    16     
64     64     
-48    -16    
48     80     
-240   -32    
112    112    
-80    -48    
-224   32     
448    144    
-32    96     
-32    64     
48     64     
0      0      
208    176    
-128   96     
-80    272    
192    144    
-80    -48    
80     -16    
-112   -128   
240    -48    
-336   0      
208    32     
-16    48     
32     16     
-16    96     
112    240    
0      224    
64     384    
-160   112    
64     48     
-32    64     
16     -80    
80     64     
-112   48     
304    176    
-224   64     
-80    208    
96     -64    
112    32     
48     112    
-16    0      
32     -80    
96     -64    
16     64     
64     32     
-16    128    
0      176    
-128   80     
144    -32    
-80    32     
304    96     
-128   32     
80     32     
320    256    
-96    144    
48     32     
-128   -64    
192    112    
0      336    
192    32     
-16    0      
288    96     
-96    64     
112    304    
96     144    
208    144    
-112   -576   
-192   -384   
-48    -16    
-64    32     
48     0      
-128   96     
-16    -304   
48     240    
208    336    
-224   64     
-64    -320   
48     160    
0      -32    
-16    -144   
-64    128    
112    -656   
-48    144    
128    128    
64     192    
96     -16    
80     160    
224    208    
112    0      
-96    16     
128    80     
-16    -80    
48     144    
128    160    
-352   48     
208    80     
-96    -432   
336    16     
-32    304    
192    80     
48     128    
112    64     
320    224    
-208   176    
-48    -160   
32     32     
208    96     
-64    144    
-48    160    
160    0      
-224   32     
128    -80    
240    240    
-256   -352   
144    96     
240    64     
32     128    
48     -608   
224    144    
352    160    
-400   -80    
32     -80    
448    96     
0      320    
224    -48    
-128   112    
128    -304   
80     80     
48     -288   
48     80     
32     224    
96     48     
-64    64     
208    64     
64     48     
192    48     
-16    -64    
112    32     
-144   0      
128    32     
64     320    
32     -96    
64     0      
0      -592   
144    -336   
240    -48    
-160   480    
64     -480   
-32    688    
64     -304   
256    -80    
128    624    
-160   80     
128    48     
-240   -32    
320    -512   
-64    112    
224    32     
64     64     
-80    32     
336    -192   
-112   192    
144    -32    
48     112    
160    48     
-128   80     
64     112    
144    -368   
-32    80     
96     -368   
16     112    
32     -336   
32     304    
32     -240   
0      48     
128    -1888  
-80    112    
80     48     
-32    -32    
112    176    
144    192    
64     112    
112    208    
144    192    
-112   -176   
16     0      
-128   -208   
192    -48    
-48    -64    
96     0      
80     -272   
96     272    
-32    64     
96     -1328  
96     80     
-864   -96    
-176   -1392  
208    -352   
240    -560   
32     48     
112    192    
80     0      
208    160    
16     160    
-80    -208   
32     -688   
112    -160   
32     -160   
-16    -32    
-80    112    
-688   -48    
128    -320   
-128   64     
192    -16    
-128   -32    
320    -320   
-224   80     
96     -304   
-96    32     
240    64     
-112   64     
64     -192   
176    0      
48     -192   
208    -96    
-352   160    
64     -192   
-16    -240   
32     -80    
-144   -448   
48     96     
-80    -416   
96     -64    
96     144    
-96    -400   
-16    -256   
224    48     
-48    352    
128    -96    
-80    -64    
-112   -128   
48     -144   
-32    240    
-32    -608   
-96    -288   
144    64     
-208   -272   
224    -352   
-32    112    
208    -2144  
48     288    
-208   -224   
720    320    
-512   64     
256    -208   
-112   544    
256    224    
-592   -304   
112    -112   
-96    32     
-16    224    
144    -224   
-144   -528   
272    -16    
-192   -1904  
192    -160   
64     224    
336    576    
-144   -16    
144    -112   
-384   -288   
144    48     
-16    224    
-80    224    
-240   96     
-48    320    
192    304    
-192   -336   
224    144    
0      -160   
48     48     
-112   -368   
112    -496   
80     -48    
144    32     
368    -96    
-64    64     
128    16     
96     80     
-176   16     
208    336    
-80    256    
32     96     
-48    128    
80     -512   
-32    -208   
192    -2128  
176    -112   
-96    0      
176    64     
64     112    
48     -16    
-560   64     
16     -240   
32     80     
80     96     
-432   -128   
80     -224   
400    80     
80     -352   
32     80     
-192   -176   
176    80     
32     112    
240    288    
-512   -128   
224    32     
-48    80     
112    64     
-112   64     
16     80     
256    64     
192    -64    
-192   48     
96     -112   
96     16     
32     112    
192    16     
48     32     
-16    -16    
-112   -48    
48     -16    
64     48     
-32    -48    
80     48     
304    128    
-160   64     
-432   -112   
48     80     
-320   -112   
-448   0      
176    112    
-1360  -80    
-48    96     
-528   -144   
144    -16    
144    224    
-160   -80    
0      64     
-112   -48    
-864   -208   
80     -48    
-416   -32    
-48    96     
-272   0      
128    96     
-112   80     
-176   64     
80     80     
-48    32     
-112   80     
-400   96     
16     208    
80     -128   
-128   -96    
128    128    
48     128    
-80    -32    
160    128    
112    -224   
-80    -16    
-176   -64    
96     64     
-80    64     
-256   48     
-80    32     
-256   0      
112    96     
-352   -80    
-32    32     
0      160    
144    80     
-32    -240   
288    208    
-80    -16    
-288   64     
256    0      
-48    112    
-128   -16    
-128   16     
-80    0      
-400   -144   
-32    48     
-720   32     
32     160    
0      -96    
-32    80     
-64    -160   
-144   -16    
96     32     
96     144    
-128   -32    
-32    48     
336    256    
-464   64     
-96    32     
160    64     
-32    48     
-208   0      
-96    -48    
64     -96    
-160   -96    
256    -48    
-192   144    
144    432    
48     0      
-16    16     
-128   -80    
32     0      
-160   -48    
80     -64    
16     32     
-192   -64    
-256   176    
-96    240    
-976   16     
96     48     
16     48     
176    16     
-128   96     
144    336    
-320   96     
-96    64     
32     16     
48     0      
-16    0      
-256   -16    
160    48     
-272   -32    
96     32     
-544   -192   
-128   -80    
288    -48    
80     176    
-176   0      
80     112    
16     128    
-32    112    
48     0      
-128   48     
160    16     
-64    144    
-48    16     
16     144    
112    208    
-64    -144   
0      128    
32     16     
-48    32     
-32    80     
128    128    
0      112    
32     -64    
-192   -16    
272    544    
96     192    
-32    -80    
96     96     
-48    0      
48     384    
-240   32     
-48    0      
112    32     
-64    16     
48     144    
0      16     
-80    96     
64     32     
-32    64     
-32    32     
-16    272    
-16    -80    
32     96     
-176   -96    
-64    32     
256    160    
-64    112    
320    496    
-144   192    
16     -112   
-80    -112   
160    240    
144    208    
-128   288    
16     112    
32     -16    
-192   16     
48     144    
-176   32     
32     112    
144    64     
-192   96     
224    208    
-32    160    
-128   -32    
-16    0      
96     0      
-32    -16    
96     112    
-80    -176   
-16    48     
0      64     
-48    160    
-96    -16    
-144   -160   
240    -368   
-32    -96    
288    160    
32     320    
-48    336    
128    48     
432    336    
-64    368    
-48    -64    
48     0      
64     32     
-16    0      
48     -16    
48     176    
16     -192   
-128   -80    
32     -224   
0      288    
112    -288   
48     720    
256    -256   
-208   96     
-96    -144   
96     -32    
96     432    
-48    -64    
-16    -256   
240    400    
-160   48     
128    -16    
64     144    
64     96     
-16    -96    
0      -32    
-160   -336   
64     -304   
48     -272   
-96    -64    
32     -64    
144    16     
-32    96     
224    -224   
-64    144    
-16    128    
144    -1584  
32     96     
32     32     
-112   48     
160    96     
-16    80     
0      32     
96     48     
0      48     
256    192    
-224   -112   
32     16     
64     80     
-80    -112   
160    128    
240    -432   
-144   384    
96     208    
48     0      
0      64     
144    -32    
144    32     
112    16     
-256   -176   
208    -160   
-128   -144   
160    256    
-16    64     
-96    -32    
112    96     
0      -160   
144    32     
16     208    
-112   192    
16     208    
-16    64     
-32    16     
-48    16     
32     -112   
192    352    
-256   96     
96     16     
-160   -400   
144    -560   
128    112    
-32    -736   
112    -32    
48     -416   
64     48     
-16    32     
16     112    
-32    -16    
256    304    
-240   -272   
-16    -288   
112    80     
-128   -32    
80     32     
-48    -96    
224    128    
-48    -96    
112    112    
-64    352    
-32    -80    
-32    -832   
-48    112    
32     128    
32     96     
128    320    
-32    64     
96     -192   
-32    64     
-48    336    
288    -592   
-288   -96    
-64    -624   
256    560    
-48    -352   
0      256    
48     -352   
272    176    
32     368    
-80    144    
80     -80    
-32    96     
-80    -176   
144    -16    
160    48     
48     48     
144    304    
192    -672   
80     128    
288    416    
-16    576    
-160   240    
-16    160    
48     -16    
-32    -176   
32     -256   
-16    32     
208    160    
0      -160   
96     240    
272    -80    
-384   80     
240    -400   
-96    96     
-80    -144   
32     80     
192    -1072  
144    -48    
-208   -208   
208    176    
16     208    
16     64     
48     -192   
112    48     
-16    -304   
32     -240   
176    224    
-16    -144   
96     0      
624    224    
-784   240    
176    -784   
-80    -1008  
64     144    
240    128    
-544   96     
-256   64     
-480   -448   
176    -32    
-192   -256   
176    -64    
64     256    
128    -128   
-16    128    
80     -128   
176    192    
-160   192    
128    -144   
-112   -16    
176    -288   
160    176    
-1840  -16    
256    -128   
32     48     
224    64     
-192   -176   
352    -64    
176    -176   
-80    160    
208    -16    
-96    -96    
208    160    
0      -48    
-48    -112   
64     -224   
-48    -48    
-32    -80    
240    144    
-16    0      
64     -128   
160    -32    
64     -704   
-16    -32    
128    -1040  
128    80     
128    96     
-144   -32    
208    -48    
16     48     
-112   -32    
-48    -64    
-16    -48    
192    0      
-224   -112   
-16    -160   
-64    -160   
128    -432   
96     32     
64     48     
224    -32    
-160   144    
144    32     
48     -128   
0      16     
-64    64     
32     208    
-48    112    
-128   176    
-304   48     
-144   -64    
96     160    
-288   96     
96     16     
16     -128   
64     128    
160    -848   
-160   -16    
224    48     
-160   -32    
176    384    
-48    -256   
-96    -144   
192    -48    
48     112    
-32    -32    
208    144    
-16    -128   
-144   -48    
80     -544   
16     -16    
128    -96    
32     112    
80     -64    
64     -64    
-16    -32    
0      -336   
-144   -160   
192    -16    
-848   96     
304    144    
-384   -32    
-32    -192   
-240   -64    
16     -160   
48     112    
272    -352   
-96    144    
48     -1760  
112    208    
-128   48     
112    160    
16     32     
0      -64    
-48    -48    
160    64     
0      112    
48     -96    
144    32     
-64    -96    
208    128    
48     -288   
-32    128    
-272   16     
48     16     
-80    160    
208    0      
48     -48    
112    0      
-448   -368   
416    -80    
128    208    
-256   32     
-80    64     
-48    -176   
-176   272    
320    -64    
32     -112   
-176   80     
48     144    
-176   144    
208    -80    
-192   16     
128    -16    
-384   0      
240    -64    
-144   16     
304    -192   
80     32     
-480   -176   
-32    80     
-336   -112   
160    48     
-64    0      
-432   16     
-256   -128   
0      -80    
-48    48     
144    -48    
-160   80     
224    144    
-336   -48    
-256   -64    
80     160    
-368   -96    
240    272    
-336   128    
-272   -288   
96     80     
-128   128    
-208   -224   
-64    -96    
544    656    
-1136  576    
-288   144    
80     48     
-288   -32    
320    -112   
-176   128    
512    32     
-480   0      
112    -112   
-208   -16    
-144   -32    
112    128    
-128   96     
-336   64     
-64    -144   
-112   -32    
-32    -80    
-320   -144   
144    -64    
48     -64    
48     64     
-64    -144   
80     128    
-224   240    
-64    -64    
-128   0      
-32    16     
368    512    
-416   432    
-64    112    
-224   -48    
240    144    
-16    64     
176    288    
-416   176    
96     368    
32     144    
-144   0      
48     -48    
176    144    
32     112    
-192   -16    
-64    -96    
96     -304   
-64    -224   
256    -112   
320    384    
-176   432    
48     320    
-64    -112   
0      -208   
288    416    
-400   208    
272    -16    
-16    288    
-192   -224   
0      208    
-96    -128   
96     -16    
-128   -224   
176    -96    
-192   240    
-368   -240   
112    80     
64     -112   
48     32     
48     112    
64     64     
-64    32     
32     32     
-32    16     
0      48     
-80    80     
144    160    
-160   -112   
-48    -240   
320    560    
-352   400    
96     -352   
-608   0      
128    336    
-16    128    
48     112    
-64    0      
176    128    
-336   -96    
64     -272   
-32    -128   
-176   -176   
-32    112    
-112   -32    
0      256    
-192   32     
144    -16    
160    -224   
-304   96     
-64    -528   
-48    -112   
80     176    
112    112    
-304   0      
-16    0      
160    176    
-208   0      
0      -16    
-176   -48    
288    144    
-224   32     
128    48     
-16    32     
16     48     
112    64     
-176   336    
80     -128   
-288   -480   
16     64     
144    80     
-80    48     
32     -16    
-144   -176   
-16    -240   
0      -48    
-64    -352   
176    192    
192    656    
64     -32    
96     416    
32     304    
64     0      
-32    -16    
64     16     
-64    -208   
144    -160   
80     144    
128    -64    
-112   -16    
0      80     
32     0      
-48    176    
16     96     
48     96     
-224   -96    
384    80     
-160   544    
544    336    
-432   -32    
112    -640   
112    464    
-64    912    
112    176    
-256   -176   
144    32     
-144   64     
-80    -160   
16     64     
272    208    
-32    -32    
-96    256    
96     -336   
32     272    
112    96     
-16    -176   
96     208    
-192   -32    
240    -144   
-224   -96    
288    64     
0      64     
48     176    
-80    -128   
320    -32    
-160   176    
160    -112   
-144   -384   
208    -240   
32     -192   
-320   -752   
96     160    
112    144    
112    208    
-80    128    
-16    80     
16     192    
48     0      
-48    96     
192    80     
-256   320    
80     0      
-80    0      
176    -32    
16     224    
-112   144    
16     -48    
16     -80    
672    640    
-656   176    
80     -592   
-64    -80    
240    -1360  
192    240    
-160   16     
160    80     
112    224    
16     96     
176    -64    
-192   -480   
-240   -432   
272    -16    
-80    16     
-112   -112   
224    64     
80     -32    
112    128    
0      -352   
16     -144   
80     -128   
32     48     
32     96     
-80    48     
64     80     
96     128    
112    256    
64     176    
-64    16     
-128   -16    
448    64     
176    -48    
-80    -48    
48     -1120  
32     -80    
-64    -160   
32     224    
128    16     
32     -16    
32     -16    
-96    128    
64     80     
-112   -16    
-48    0      
128    160    
160    112    
-96    -160   
0      112    
32     -416   
64     112    
-48    -768   
112    64     
112    128    
64     96     
-16    -128   
-48    -32    
272    -80    
32     208    
336    160    
-272   -80    
320    112    
-16    0      
80     32     
64     80     
32     16     
-48    -288   
-128   16     
16     -960   
-128   -16    
32     48     
96     96     
0      80     
160    240    
-160   32     
80     -64    
-32    32     
160    -32    
192    224    
112    160    
32     16     
-144   -608   
192    112    
-256   -224   
128    112    
-80    48     
80     64     
64     -80    
-96    112    
240    48     
-128   80     
32     128    
256    -208   
32     128    
0      -224   
16     64     
64     -256   
16     48     
64     32     
352    80     
-240   -288   
256    64     
32     144    
64     128    
-80    80     
176    32     
144    96     
-96    -144   
112    96     
96     32     
-176   48     
-32    -160   
208    64     
64     48     
-160   -16    
16     -320   
432    224    
-368   96     
96     -128   
16     -752   
32     -128   
96     -1952  
80     -80    
48     80     
32     -80    
144    160    
96     160    
192    336    
-96    -144   
112    -1776  
-192   -160   
224    -272   
112    32     
-880   -64    
112    -656   
-16    -64    
224    -1072  
-144   -64    
16     -64    
96     -144   
16     160    
192    -208   
32     -192   
80     32     
48     -224   
-16    80     
144    -352   
112    -272   
-768   -224   
0      -400   
144    32     
80     -208   
32     16     
144    -400   
0      -128   
0      320    
96     -80    
224    0      
-144   48     
192    32     
-128   128    
304    -48    
-64    -192   
-352   -64    
96     -16    
16     -128   
224    -64    
272    80     
-208   -464   
0      -112   
208    176    
-160   -96    
80     -320   
128    -368   
-240   -416   
416    128    
-112   48     
-144   -288   
-80    -64    
-144   192    
-1200  -48    
112    -16    
-64    -64    
16     -144   
-16    -48    
128    64     
32     64     
-32    0      
80     96     
-16    -96    
-80    -256   
-128   -160   
160    -128   
-192   -112   
96     32     
96     288    
-128   192    
16     176    
96     144    
-112   272    
128    0      
-144   560    
-16    -1200  
32     112    
112    32     
0      -32    
64     144    
-64    -400   
-80    -32    
336    224    
-288   144    
112    -240   
-560   -96    
96     -176   
-64    -192   
32     -608   
-80    400    
272    -304   
-128   -16    
240    224    
16     576    
16     -16    
-32    -176   
-112   0      
176    336    
-240   -192   
256    208    
-496   224    
-80    -128   
96     144    
64     -560   
160    64     
48     -128   
64     32     
-128   192    
-240   -336   
688    -304   
-400   -192   
192    -272   
32     64     
0      400    
64     -192   
32     96     
-80    -128   
48     -16    
64     -144   
128    352    
-80    -432   
-208   32     
-48    -384   
16     -160   
192    384    
-240   96     
-80    -272   
304    400    
-528   -64    
-16    -208   
-160   -176   
224    -240   
-368   288    
-192   240    
32     -464   
-944   -112   
-32    112    
32     -112   
240    320    
-96    32     
144    -160   
-432   16     
352    32     
-304   -16    
176    16     
0      48     
-1184  240    
-80    288    
-1232  -432   
160    -432   
-256   -32    
-16    256    
16     -80    
-384   128    
112    80     
-928   240    
-32    144    
128    -224   
-32    256    
208    240    
112    640    
-128   448    
-208   -416   
-96    -640   
32     -32    
144    16     
-432   -240   
-64    -256   
-608   -272   
-16    -32    
-432   112    
192    144    
-704   -576   
0      -304   
272    -48    
-128   -192   
-192   -160   
160    32     
80     -32    
-144   80     
32     0      
0      0      
16     64     
-16    96     
-16    16     
-112   32     
-48    80     
-1008  -112   
64     48     
-304   16     
112    528    
-32    192    
-368   -496   
416    -272   
-224   944    
-64    -224   
-96    -688   
144    608    
-48    0      
48     128    
-112   320    
224    32     
-592   -208   
144    80     
-928   144    
48     -16    
16     336    
-32    176    
-32    -128   
-112   -160   
160    -32    
-112   144    
176    -128   
32     176    
-48    -48    
0      0      
-16    208    
-96    128    
-144   -592   
-80    -160   
-48    256    
-64    -16    
0      -288   
-32    -224   
48     -176   
48     384    
32     -128   
-144   -64    
-48    96     
208    0      
-240   64     
-144   160    
240    496    
-32    432    
-96    16     
80     96     
-96    0      
112    -128   
-80    -304   
64     -128   
-176   -112   
240    0      
-16    80     
112    48     
-128   96     
176    32     
-48    16     
-64    -16    
-96    64     
-48    192    
-144   128    
-832   -112   
64     64     
-32    32     
64     64     
0      128    
32     32     
-112   0      
96     48     
-96    112    
-240   -96    
-256   -128   
160    48     
-192   64     
-96    -16    
-48    96     
0      48     
-352   -144   
112    -112   
112    240    
-32    0      
-32    -208   
-16    288    
224    224    
-192   80     
-80    64     
80     16     
-16    0      
-144   -144   
272    0      
-304   128    
352    512    
208    496    
-224   144    
176    96     
-16    208    
-160   -96    
-192   -80    
192    224    
-16    -64    
160    -192   
288    128    
176    272    
192    464    
-336   208    
128    16     
-176   -16    
224    80     
0      -16    
-96    224    
160    144    
-16    -16    
64     0      
32     -96    
0      -80    
112    -96    
128    -64    
-48    -48    
176    208    
-80    -64    
160    32     
192    176    
80     64     
80     176    
0      112    
-112   208    
64     192    
-32    128    
32     192    
64     160    
-32    -32    
32     304    
-80    48     
272    144    
-80    -80    
112    -16    
-208   0      
-64    64     
128    128    
-32    96     
-80    96     
-32    112    
48     80     
-80    16     
48     0      
-48    16     
32     144    
-176   0      
-128   224    
288    112    
-48    256    
64     -32    
-32    64     
16     48     
-48    32     
16     64     
224    208    
-288   128    
-16    -48    
-32    -96    
-112   32     
208    224    
-272   -80    
0      -176   
256    32     
0      96     
48     -128   
-224   64     
352    144    
-176   64     
112    64     
80     32     
16     96     
112    -16    
-16    80     
80     128    
80     208    
-48    -16    
-32    -304   
176    -48    
-192   -208   
80     240    
96     112    
48     48     
-144   48     
16     80     
48     16     
48     -64    
16     0      
112    144    
-208   -48    
128    160    
96     128    
80     -160   
176    160    
-256   -32    
208    368    
-128   112    
-16    -32    
32     -224   
48     48     
208    32     
-112   144    
96     -112   
-48    192    
240    288    
-208   384    
-80    32     
160    -208   
-16    16     
80     -512   
32     160    
-16    288    
80     96     
112    80     
16     192    
-160   -336   
48     -112   
80     -16    
64     32     
32     144    
-80    32     
-48    -32    
-128   -672   
192    80     
144    -304   
-80    64     
160    -480   
80     80     
96     -112   
-16    -208   
96     -320   
-64    -144   
176    80     
-112   -16    
144    64     
16     -144   
48     128    
-48    -256   
224    48     
-112   272    
112    336    
32     -32    
48     -128   
-16    -736   
-16    -16    
16     80     
192    352    
48     -128   
-32    80     
-32    -160   
240    176    
-64    240    
288    -128   
-48    960    
96     -656   
128    -160   
16     -288   
208    -768   
176    640    
240    0      
0      208    
176    32     
80     128    
-176   -240   
320    96     
-208   144    
240    -64    
-112   -624   
224    512    
-64    144    
112    -128   
-16    112    
80     16     
240    -208   
-176   -176   
112    112    
240    384    
-144   -416   
192    32     
-32    -128   
64     -96    
128    48     
-80    -336   
80     144    
-32    -240   
0      -32    
352    128    
352    368    
-48    -80    
-112   -80    
80     -96    
-64    -1984  
112    288    
-352   -816   
80     -720   
-48    480    
-32    -1232  
64     -144   
128    272    
288    688    
192    288    
-336   -656   
240    -2640  
32     368    
-80    -544   
64     -112   
208    -176   
272    -176   
-16    112    
-80    -320   
16     0      
304    -912   
16     192    
144    -832   
160    256    
-176   -16    
272    -608   
-16    -432   
320    624    
-288   240    
320    -160   
64     96     
16     -96    
-592   304    
-176   -640   
0      288    
-32    -624   
288    -416   
112    640    
-48    -336   
416    -1248  
-96    288    
0      -560   
160    -16    
-80    64     
32     48     
-272   -320   
432    208    
-656   -96    
96     -224   
32     16     
112    -48    
64     0      
112    -256   
112    0      
64     -800   
32     144    
48     64     
160    -16    
32     -96    
80     64     
-64    -80    
128    -240   
-128   -32    
-208   96     
368    -400   
160    48     
464    1376   
-448   128    
128    -832   
144    608    
-80    -160   
160    -128   
-320   80     
304    -608   
-128   464    
208    64     
-272   -736   
-32    224    
272    -96    
-416   176    
192    -96    
-560   -128   
-64    -16    
144    496    
144    -464   
-64    -64    
80     -880   
112    -208   
-32    288    
48     -48    
-80    112    
208    240    
-32    -288   
-32    32     
-240   -16    
-32    0      
-96    32     
32     0      
224    0      
32     -208   
16     96     
144    -272   
-80    448    
176    208    
208    0      
-272   -416   
144    -336   
208    672    
-272   -80    
96     32     
112    48     
-320   -240   
48     -144   
-224   208    
224    -80    
-288   -256   
400    -176   
-192   208    
-48    48     
112    -96    
-400   -144   
96     48     
208    208    
-160   64     
-208   112    
64     -608   
-384   -192   
128    -432   
-32    -112   
160    -320   
96     32     
80     -544   
112    64     
64     80     
48     64     
-240   0      
192    0      
-208   -112   
240    16     
-224   -160   
128    -192   
-224   0      
240    0      
48     32     
-448   -96    
-32    80     
-336   -240   
-1312  48     
208    64     
-1168  16     
48     112    
0      16     
-112   -32    
-48    -384   
-144   -32    
160    16     
-368   224    
128    0      
-176   64     
64     -256   
-32    -224   
80     -144   
-256   16     
-16    -48    
-96    0      
-224   -16    
-1264  0      
-144   16     
0      -16    
32     160    
160    112    
-48    -16    
-272   -64    
128    96     
-192   -64    
176    128    
-96    -144   
32     64     
128    144    
-432   16     
32     48     
-64    48     
48     224    
352    208    
-112   128    
32     0      
-32    64     
-16    112    
-96    160    
-128   48     
-80    16     
-208   32     
384    -80    
-48    -48    
144    -272   
32     -144   
16     -1056  
-320   -816   
-240   -464   
96     -112   
-240   -288   
-128   -208   
256    0      
0      144    
-16    160    
-96    64     
-96    32     
-304   -144   
-336   96     
-64    144    
-96    224    
-192   -96    
-208   -112   
-176   -96    
192    288    
-1088  48     
192    464    
32     96     
-288   128    
-48    48     
-80    -32    
96     64     
96     160    
-160   112    
-176   48     
80     -32    
96     -144   
16     -32    
80     16     
48     96     
-128   32     
0      0      
16     16     
144    128    
-176   32     
16     0      
-32    -144   
96     96     
112    80     
-224   -32    
48     64     
-32    -192   
-80    144    
-80    32     
-112   96     
-400   -96    
-48    64     
176    -32    
-128   32     
16     48     
0      32     
-192   -48    
0      -64    
64     176    
-400   -64    
304    64     
-32    80     
112    0      
-304   -16    
192    64     
-80    -32    
-80    176    
-160   -160   
-16    48     
112    -16    
-64    16     
48     -80    
112    112    
48     80     
32     176    
96     96     
112    128    
-208   112    
64     -16    
-32    32     
-48    -32    
112    112    
64     80     
80     0      
-64    48     
-16    96     
64     16     
0      -48    
48     0      
-16    96     
16     -16    
-64    -96    
-16    96     
128    0      
-80    64     
144    176    
160    128    
-192   80     
144    16     
-32    16     
48     48     
64     64     
0      64     
-48    -192   
64     -16    
-80    64     
32     176    
-32    -96    
-160   -96    
144    -288   
-352   -720   
-32    -272   
80     16     
80     32     
96     144    
272    288    
-208   -336   
-16    -80    
192    48     
-16    64     
144    128    
-144   80     
128    160    
-96    -32    
96     240    
0      0      
-16    -144   
32     128    
80     432    
32     -48    
80     80     
16     624    
0      -640   
0      608    
-144   -352   
208    48     
-128   -192   
0      -240   
-304   384    
48     272    
-48    64     
32     0      
-144   144    
-96    -80    
48     48     
-112   112    
192    48     
-192   96     
64     96     
64     128    
32     -208   
-208   0      
-32    160    
0      -16    
32     144    
112    96     
-64    96     
224    160    
-240   64     
-16    -272   
272    32     
-144   -32    
32     48     
-112   176    
80     192    
96     272    
-48    -32    
0      288    
-144   -176   
192    -32    
-128   304    
48     -208   
16     144    
0      160    
80     288    
176    464    
-16    432    
272    416    
-48    416    
304    -48    
112    384    
-64    48     
240    -144   
112    96     
96     -240   
144    0      
-32    -352   
-160   -256   
208    64     
192    144    
-112   -128   
192    336    
208    320    
64     48     
48     -192   
16     48     
240    320    
112    -64    
512    384    
-48    336    
-320   48     
432    -400   
32     -48    
-368   80     
304    160    
80     224    
-240   464    
-160   -224   
144    -432   
-112   16     
80     80     
160    416    
80     464    
-96    208    
-16    -416   
384    304    
272    256    
80     160    
16     -32    
-64    -288   
528    400    
112    112    
144    -256   
240    112    
-224   -160   
80     320    
64     176    
-224   -640   
-208   -576   
304    -592   
160    1088   
160    -448   
224    112    
-16    -672   
144    432    
64     -112   
96     320    
48     -336   
144    1424   
-80    -192   
-304   -1008  
272    304    
-144   240    
-32    -272   
48     -304   
128    144    
80     -48    
-176   -192   
448    -416   
-112   368    
128    -192   
0      176    
-112   -384   
288    240    
-48    832    
272    0      
48     -304   
0      -288   
48     208    
96     -496   
96     128    
160    -32    
-32    -80    
192    -320   
-288   -112   
64     -704   
0      96     
0      -16    
64     -160   
-64    -48    
32     608    
-80    272    
128    -944   
-112   -256   
-64    -272   
144    528    
16     256    
64     160    
0      -192   
-80    224    
112    -272   
-48    256    
64     80     
-80    224    
64     224    
112    -32    
-80    304    
144    -608   
-112   -384   
176    -208   
16     256    
208    -160   
-128   16     
48     0      
128    176    
-48    0      
-64    -512   
176    112    
128    -480   
-128   -1600  
-16    -16    
0      -544   
160    192    
112    -1824  
48     -64    
-16    128    
128    128    
-160   -16    
96     16     
224    -432   
-80    48     
-16    -400   
16     144    
80     -288   
-112   -144   
-48    32     
-16    -96    
112    -160   
112    -288   
-160   -176   
96     -16    
192    -48    
32     144    
16     -112   
-16    -528   
-160   128    
144    -160   
64     -48    
256    16     
96     112    
-432   -112   
64     -64    
256    -32    
0      -112   
48     16     
48     -112   
80     128    
0      -2256  
-16    0      
144    -112   
16     96     
176    -64    
16     64     
16     -16    
32     -80    
192    0      
-144   -64    
48     -80    
-16    -176   
96     0      
128    -560   
-64    -64    
64     -1280  
160    32     
-144   64     
32     -64    
16     -96    
80     -96    
-48    64     
16     -176   
0      -16    
16     64     
-224   80     
64     -64    
64     64     
80     -208   
48     -32    
-64    -208   
48     112    
80     384    
208    240    
-176   -80    
144    -128   
-80    -32    
-32    -16    
-48    -96    
-32    -160   
-528   224    
-208   -80    
-352   32     
-16    32     
-64    96     
0      -128   
64     32     
224    -640   
-320   128    
128    16     
48     144    
80     32     
-176   80     
-80    -16    
-112   -256   
160    -96    
-16    -48    
-304   80     
192    176    
-80    48     
-64    -432   
400    224    
80     -368   
16     -48    
0      64     
384    144    
-272   176    
-48    80     
0      -208   
144    -48    
-240   -32    
48     -16    
32     16     
64     -208   
-64    -48    
208    -192   
144    240    
-112   -112   
64     144    
352    112    
-48    -48    
48     144    
80     -32    
-96    -16    
64     32     
-112   -112   
64     64     
-144   16     
-16    -128   
176    32     
-32    -80    
80     192    
16     -112   
-144   -48    
-32    32     
64     -16    
-112   -48    
48     -80    
0      32     
96     48     
-96    96     
128    176    
192    96     
-160   -32    
128    80     
160    -112   
-224   -160   
208    16     
-752   0      
-176   -64    
-1376  -48    
144    48     
32     -48    
-144   -32    
-16    -272   
-272   -128   
224    16     
-80    64     
-96    -32    
-80    48     
0      -368   
-48    64     
-16    64     
-48    48     
-80    16     
-48    -128   
64     48     
-864   0      
-64    16     
128    48     
-16    32     
-160   -32    
176    96     
-32    0      
-32    288    
-192   -96    
48     0      
-176   16     
16     -16    
-96    64     
-112   -16    
-16    128    
-96    -32    
32     144    
-704   96     
48     160    
-144   16     
240    192    
80     304    
-416   -816   
128    -112   
176    912    
-240   -608   
16     32     
-64    160    
-96    -128   
-32    64     
-48    48     
-48    48     
-288   -16    
-80    16     
-48    -96    
0      96     
-32    -16    
64     96     
-160   -464   
112    -368   
32     432    
-240   -432   
48     608    
128    -192   
-32    224    
-96    80     
-16    -48    
-304   0      
80     -32    
-240   224    
-48    -192   
240    80     
-320   -144   
448    -192   
-240   416    
64     16     
-16    -144   
16     80     
96     320    
0      0      
-80    -48    
-112   -144   
48     -112   
224    496    
-416   -128   
32     -80    
-32    -208   
-192   -80    
16     -160   
0      0      
64     480    
-16    272    
-96    352    
48     336    
-96    112    
-496   -384   
160    -208   
-320   -96    
96     32     
-224   -112   
176    112    
-96    -224   
144    -16    
96     224    
208    80     
-80    32     
-48    16     
16     48     
-144   32     
0      80     
-128   -272   
336    -112   
-176   80     
464    272    
-176   80     
160    192    
-16    80     
208    80     
96     160    
-112   -240   
-128   -96    
192    288    
-96    -16    
-128   -128   
176    48     
96     144    
-112   208    
112    224    
-128   528    
-32    -32    
-240   -224   
16     128    
176    -32    
0      176    
-112   64     
176    -256   
-32    64     
112    64     
-48    128    
448    16     
-208   320    
-96    144    
16     -288   
48     64     
-208   32     
64     -32    
80     224    
-48    112    
112    32     
0      -16    
-304   -304   
576    208    
64     640    
-320   240    
16     -160   
-128   0      
16     48     
-96    -80    
208    -304   
16     640    
96     208    
-288   -336   
576    224    
-112   272    
0      -96    
-48    -96    
32     144    
-144   32     
304    -112   
-608   -608   
224    -80    
-16    144    
-112   -176   
-240   -608   
-208   -288   
208    -64    
-32    -272   
-144   -256   
288    -128   
-448   -192   
48     -208   
64     -16    
-80    496    
176    352    
-272   128    
144    128    
-96    160    
-288   -144   
48     80     
-64    160    
144    48     
208    288    
64     32     
-32    16     
-64    -16    
16     32     
-48    -96    
288    80     
144    64     
16     32     
-32    48     
144    176    
-48    144    
-64    -240   
144    208    
-96    64     
64     240    
16     176    
112    -32    
-208   -80    
-96    -368   
64     -160   
192    32     
-96    160    
16     80     
-224   -64    
320    304    
-224   176    
128    -144   
224    160    
-80    240    
192    352    
112    96     
-32    0      
96     96     
144    80     
-80    64     
64     96     
-176   -96    
96     80     
96     48     
272    256    
-32    80     
-80    -304   
160    96     
-48    -336   
144    80     
-96    64     
64     144    
96     96     
48     80     
0      80     
64     336    
144    -16    
-32    32     
48     48     
80     80     
-64    96     
400    160    
-176   272    
128    -80    
192    -80    
16     144    
160    16     
-192   32     
160    96     
32     80     
64     208    
80     16     
176    272    
-240   -112   
96     -112   
160    112    
0      -32    
48     80     
112    -832   
112    32     
-64    -64    
96     96     
-64    -160   
0      144    
144    208    
-112   80     
-80    0      
224    112    
-48    0      
-16    -16    
-32    -48    
224    -272   
0      128    
144    0      
-96    32     
96     -704   
80     48     
64     144    
128    112    
-80    -16    
144    32     
16     64     
256    96     
160    240    
-32    32     
160    192    
-16    -64    
48     64     
176    96     
16     16     
96     -144   
32     48     
16     0      
80     128    
80     -160   
-176   144    
368    -32    
-128   -96    
240    -16    
-160   -272   
176    16     
-48    -352   
144    144    
128    -96    
-16    -64    
112    -416   
16     0      
128    96     
80     48     
112    48     
16     208    
0      96     
16     -64    
16     -32    
-32    -128   
0      160    
-16    -176   
176    96     
-48    16     
112    -32    
-64    -320   
128    80     
-96    -32    
192    160    
144    0      
160    64     
48     -16    
96     -48    
48     16     
64     -48    
64     -64    
16     80     
112    208    
112    32     
96     128    
-192   32     
224    96     
-192   80     
128    48     
0      80     
-128   -480   
16     -944   
128    -48    
-192   -128   
336    -128   
32     -576   
112    -128   
16     96     
32     -96    
272    336    
80     16     
-32    -512   
256    160    
-64    -416   
176    -64    
-32    -240   
192    -272   
192    -96    
160    -80    
144    -112   
-64    -576   
96     -112   
352    192    
80     48     
-64    112    
64     -80    
80     -80    
0      16     
16     -192   
80     144    
-80    48     
16     -32    
-272   -32    
0      -144   
-48    -192   
-16    -224   
320    64     
32     32     
48     -48    
400    -1216  
-240   144    
-80    -64    
-48    32     
96     -16    
32     -16    
-32    -208   
240    144    
-240   -128   
48     -48    
-80    -208   
240    -16    
16     -48    
-112   -416   
32     -112   
208    -1392  
-96    96     
-112   -16    
80     112    
128    -80    
128    16     
-96    32     
416    256    
-384   32     
128    48     
-416   80     
160    32     
-80    -16    
0      -224   
-80    256    
160    -64    
-64    240    
-80    -96    
144    -16    
-64    144    
240    240    
-64    592    
128    -416   
16     208    
192    256    
-32    48     
16     -320   
-544   64     
-96    -256   
-16    0      
48     -256   
48     144    
64     -1136  
-48    32     
80     96     
-48    32     
64     80     
-112   -112   
352    480    
-160   16     
-976   -544   
48     -256   
-64    160    
-272   -64    
272    48     
48     -592   
-96    16     
112    -1216  
64     64     
32     16     
80     32     
-128   0      
80     -80    
-192   -32    
256    128    
-384   -144   
128    -80    
160    48     
64     -160   
80     -16    
48     -208   
80     48     
64     -160   
80     32     
-464   -16    
224    -48    
-400   128    
-32    -96    
80     64     
96     304    
-64    224    
-176   -224   
-416   -112   
0      -192   
80     112    
-48    -112   
32     64     
-96    -240   
-144   -176   
-80    -128   
16     -96    
-48    -80    
-48    48     
16     0      
16     -48    
-144   368    
128    -112   
-48    -192   
-384   -512   
64     112    
-16    64     
-464   -48    
80     -272   
-496   96     
-96    80     
-768   48     
0      128    
-80    -48    
176    112    
48     64     
-128   -112   
-688   -32    
80     96     
128    -16    
-144   128    
-384   -224   
-192   112    
-16    768    
160    576    
-80    -80    
48     80     
-96    32     
-144   128    
0      144    
0      176    
32     64     
144    112    
-368   -208   
80     -896   
352    416    
-64    368    
-96    -176   
0      -128   
48     -272   
240    592    
-336   384    
-272   -240   
-816   -736   
256    512    
-688   176    
16     -32    
-272   -256   
96     144    
-160   -208   
-32    96     
96     176    
128    48     
16     -96    
64     96     
-416   -1024  
208    704    
144    560    
-128   0      
112    208    
-80    176    
-144   -128   
-352   -624   
224    -192   
-16    80     
192    400    
-80    112    
80     160    
-16    32     
-32    -48    
384    192    
-224   128    
48     32     
-400   -560   
176    -64    
-368   -96    
-64    -32    
-1248  -16    
208    176    
-64    48     
-48    144    
192    -48    
-144   48     
144    -16    
-64    64     
64     320    
112    80     
-32    -32    
128    112    
-240   -128   
-272   -80    
112    176    
-496   -32    
-80    -176   
432    -48    
64     192    
64     64     
-64    -16    
272    80     
48     32     
-16    192    
32     48     
-64    -16    
96     32     
-160   -224   
128    80     
-48    48     
-288   -80    
96     160    
160    32     
-224   112    
96     64     
-96    0      
160    128    
-128   32     
64     96     
0      64     
-144   -96    
16     32     
144    208    
-416   -80    
160    96     
-272   32     
-192   -144   
224    112    
48     112    
80     -16    
-64    80     
192    96     
-256   -64    
320    96     
-128   -32    
64     48     
-208   16     
128    -32    
-160   -96    
32     80     
-112   32     
-176   64     
80     128    
144    160    
-256   -48    
48     16     
32     160    
-48    0      
64     112    
16     64     
0      0      
-96    48     
112    128    
-192   -16    
176    224    
-48    -32    
-32    16     
208    352    
16     -32    
32     16     
-48    -16    
160    160    
-80    64     
144    96     
-240   80     
336    176    
-32    -64    
-144   0      
80     16     
0      112    
96     144    
0      -96    
-96    32     
144    64     
-160   128    
272    80     
-16    32     
256    256    
-192   160    
-144   -32    
160    32     
-80    16     
128    96     
-176   -96    
128    32     
0      -128   
112    -208   
0      176    
224    64     
32     128    
48     -64    
16     144    
352    192    
-288   208    
0      16     
144    192    
-16    -48    
64     48     
0      16     
224    -368   
-48    80     
64     128    
64     48     
560    416    
-416   48     
0      -112   
368    -80    
64     144    
64     144    
16     -16    
64     96     
-16    -48    
32     192    
-48    80     
-96    -576   
288    160    
-64    128    
144    192    
160    112    
-176   -112   
144    0      
-32    112    
80     96     
96     80     
-224   16     
144    16     
64     -96    
-144   160    
128    80     
-176   48     
288    112    
-256   112    
48     -80    
112    96     
16     -80    
352    -48    
-32    144    
112    112    
16     48     
16     80     
96     96     
-80    112    
96     48     
16     32     
0      -32    
-176   -64    
272    112    
-144   112    
160    80     
-96    128    
144    64     
112    144    
-256   128    
64     64     
-16    16     
80     112    
-32    80     
0      -192   
80     80     
-16    -432   
0      64     
0      -832   
48     64     
-32    80     
176    16     
-320   -64    
448    -208   
-96    -304   
112    160    
-64    -32    
-32    0      
352    64     
-32    32     
256    400    
-208   -64    
208    80     
-32    -304   
96     128    
-144   -512   
-80    -320   
272    64     
-96    272    
-208   96     
96     128    
-64    -32    
-144   -256   
272    128    
48     80     
48     144    
-16    -32    
128    -32    
16     -256   
272    192    
-320   -48    
160    16     
288    368    
-224   336    
-224   160    
256    80     
80     16     
48     48     
-96    80     
112    0      
-128   0      
288    -208   
-112   160    
448    -736   
-176   512    
128    -240   
-64    80     
-32    -656   
16     -128   
64     -32    
144    16     
160    16     
176    160    
0      128    
176    -224   
-64    -64    
144    -80    
32     240    
-208   -304   
240    -64    
624    704    
-608   -720   
112    -288   
16     192    
48     64     
80     80     
-112   -208   
240    -896   
-128   368    
-16    -832   
-16    0      
160    112    
-64    512    
0      -320   
192    80     
128    304    
-112   80     
64     48     
176    672    
48     -224   
-144   -1024  
176    -672   
112    -400   
-16    -64    
96     -112   
16     112    
80     80     
16     160    
192    -208   
-32    128    
32     -176   
128    -48    
64     304    
208    496    
-32    16     
48     -864   
64     80     
160    -32    
-96    -176   
128    -48    
-64    -288   
304    -96    
-32    32     
64     -64    
80     96     
48     -64    
128    64     
-96    16     
208    -352   
-32    -16    
-64    -64    
-64    48     
128    160    
-240   -400   
176    -128   
32     -352   
64     -80    
288    -496   
-80    368    
192    224    
-32    32     
480    -16    
-288   -144   
160    -112   
128    192    
-64    32     
-128   -32    
-288   -80    
-48    -192   
96     -32    
-64    -496   
-16    -144   
224    16     
-64    144    
80     -224   
-192   128    
272    -96    
-32    96     
128    -144   
-80    -416   
-64    -304   
336    352    
-528   144    
-16    -144   
-176   -416   
-32    -256   
128    32     
0      -32    
96     -160   
80     -1216  
-80    -32    
112    -416   
192    -160   
144    32     
64     -128   
-128   -144   
192    -16    
-128   96     
112    -32    
32     224    
-336   208    
176    -400   
240    80     
-32    864    
-80    -720   
256    208    
0      240    
-96    -192   
80     160    
112    736    
-304   192    
-64    -784   
-48    -64    
112    48     
-160   -160   
96     96     
-896   -80    
32     -48    
64     16     
176    -432   
304    544    
-304   -208   
64     -288   
-224   336    
272    416    
-176   368    
64     112    
-96    -336   
-80    -512   
-144   -432   
-96    -272   
-320   -144   
-368   -960   
304    -256   
240    -96    
64     224    
0      16     
0      0      
192    96     
-80    -48    
112    32     
-608   -448   
160    -128   
16     -80    
48     128    
-64    -32    
-16    48     
256    -96    
-32    -32    
112    -320   
-112   -336   
0      -176   
0      -112   
-432   -16    
144    -32    
-160   16     
-96    -80    
-96    64     
-64    -288   
-112   192    
208    -336   
-272   0      
144    -320   
-192   32     
128    -192   
128    240    
-272   32     
176    16     
-112   -64    
-144   64     
-144   -256   
128    96     
32     0      
0      -64    
-48    -16    
144    -64    
-16    48     
-1520  -288   
144    -176   
-160   64     
64     128    
-48    128    
-528   -128   
-272   0      
-128   80     
64     96     
-736   144    
-512   64     
80     -224   
-48    -16    
-144   -64    
96     112    
-16    -48    
144    80     
-144   -208   
48     -64    
-32    16     
-240   64     
-48    -16    
-48    32     
0      16     
-144   64     
-112   -96    
48     64     
-96    0      
-64    -80    
224    32     
-224   -128   
128    -32    
-208   -160   
-112   -16    
48     128    
16     32     
-112   96     
-64    -32    
-80    48     
0      48     
80     32     
-352   0      
-80    -16    
32     16     
16     48     
-224   -144   
208    192    
-192   64     
16     0      
32     128    
-80    -64    
48     64     
-32    -48    
48     -160   
-160   -64    
64     160    
-256   0      
-48    32     
64     -128   
-32    128    
16     -48    
-48    96     
416    432    
-464   176    
48     112    
-176   -144   
80     64     
-64    128    
-96    -80    
-192   0      
224    -16    
-736   -192   
64     32     
-1520  -64    
176    144    
-32    -128   
112    96     
16     144    
-96    96     
-32    144    
240    80     
-192   -32    
272    320    
-176   144    
16     128    
-256   32     
-80    -48    
112    96     
-272   0      
224    256    
-192   144    
-192   -16    
16     160    
16     32     
160    176    
64     64     
64     32     
-48    0      
80     32     
-128   -16    
32     80     
16     96     
-64    -208   
-240   -336   
32     112    
208    32     
-256   0      
176    96     
64     -16    
0      144    
16     48     
-192   48     
-48    32     
-144   96     
176    48     
-32    96     
-112   -16    
32     64     
-160   -128   
96     80     
0      64     
-224   80     
432    144    
-48    112    
112    64     
-32    48     
-80    48     
224    16     
-16    96     
-64    80     
240    96     
64     176    
-144   224    
-144   96     
0      -48    
96     48     
64     96     
64     96     
-48    96     
-32    96     
176    192    
-64    48     
-16    96     
64     96     
-48    160    
-80    -208   
-96    -192   
-16    160    
160    -128   
-32    -304   
112    -112   
80     160    
96     320    
-80    112    
48     -48    
-16    96     
64     80     
-80    64     
32     0      
-96    -80    
16     80     
48     80     
112    96     
400    768    
368    80     
-144   64     
48     192    
-128   -16    
240    -160   
-16    -80    
16     -32    
336    176    
-176   272    
48     144    
144    496    
304    336    
-48    240    
-128   80     
80     -272   
-16    -128   
416    -112   
-176   224    
176    64     
192    48     
80     128    
32     16     
-96    16     
128    -64    
-64    -48    
320    32     
-176   144    
96     64     
-160   176    
224    96     
48     80     
128    96     
-32    16     
304    320    
-208   96     
-112   -480   
112    464    
-48    432    
80     -512   
144    -32    
96     544    
-96    -16    
-64    -272   
-48    -400   
-32    208    
-112   -336   
256    144    
-64    192    
-128   16     
192    -80    
208    224    
-160   -112   
208    96     
272    464    
-192   112    
112    0      
-112   64     
64     0      
48     96     
224    80     
-128   32     
64     48     
80     112    
-16    144    
96     -16    
-32    256    
-32    -32    
288    544    
-64    160    
-160   -240   
80     -304   
-16    -464   
144    80     
32     -112   
-80    -320   
368    592    
128    592    
192    752    
-96    608    
-80    0      
48     320    
-48    480    
-16    528    
-96    -464   
112    -80    
-144   -192   
-16    -464   
-112   -304   
-32    -848   
208    32     
0      -512   
224    64     
-416   0      
352    144    
-48    80     
48     96     
32     0      
96     128    
64     48     
80     96     
-64    -32    
48     -80    
80     64     
112    -96    
-208   128    
224    -64    
-160   -208   
352    352    
-144   112    
-144   -416   
64     -32    
32     -32    
32     64     
96     368    
192    736    
208    448    
-304   -128   
416    144    
-64    128    
48     272    
0      -352   
-16    -96    
32     -592   
48     112    
32     -32    
96     -96    
0      -304   
-64    -144   
112    48     
192    -192   
176    432    
80     144    
96     80     
16     -80    
128    -128   
-224   -944   
-112   -896   
416    -256   
-32    1184   
-208   -272   
192    64     
0      64     
-16    208    
96     -64    
-80    -384   
144    288    
-32    -320   
224    944    
-144   -480   
224    80     
176    80     
-16    0      
192    -16    
-16    -16    
80     64     
48     272    
0      -64    
64     0      
480    704    
-208   288    
-96    240    
80     -192   
128    208    
-80    -304   
112    -112   
144    64     
-160   -16    
-64    64     
112    144    
32     144    
32     144    
0      -16    
112    -1456  
176    -128   
48     -128   
128    -1136  
352    352    
-512   16     
240    -96    
64     336    
96     0      
-64    304    
176    -80    
16     -416   
48     -80    
-16    -576   
272    -96    
-432   176    
-112   -400   
240    -80    
80     -416   
160    -64    
-48    -832   
96     -144   
160    -320   
112    0      
-16    64     
144    -160   
-160   -32    
256    112    
-192   -80    
-32    -16    
-208   -272   
16     -80    
160    112    
96     64     
112    -96    
-80    -272   
80     -224   
-16    -496   
96     -16    
80     96     
0      48     
80     0      
352    336    
-224   -80    
80     96     
32     0      
160    112    
-640   -48    
112    -16    
160    -96    
-112   -192   
80     0      
48     -16    
224    -48    
0      -1392  
-272   -16    
352    -320   
0      64     
-128   -208   
48     32     
-192   0      
160    -16    
48     112    
-80    -64    
48     0      
256    32     
-144   32     
-64    16     
64     -32    
64     -2112  
176    64     
-304   -144   
320    0      
-192   -96    
96     -240   
-80    -80    
16     16     
-64    0      
-176   -16    
-224   -64    
-32    -160   
-160   -96    
112    -128   
-128   -64    
0      -240   
128    64     
-32    64     
-16    64     
-256   -32    
272    -112   
-448   -48    
176    128    
-112   -32    
128    80     
-400   16     
112    -64    
64     -144   
128    0      
112    -32    
-80    -96    
-48    -96    
112    -64    
304    272    
96     0      
112    176    
-272   144    
224    -112   
-336   112    
112    -112   
-16    16     
144    0      
-80    32     
256    -80    
48     96     
-48    -352   
-80    -64    
176    -848   
64     -96    
-256   144    
64     80     
64     112    
-144   -32    
-32    64     
32     176    
-112   0      
48     -160   
-80    -64    
144    -80    
0      0      
-32    -128   
448    224    
-368   176    
224    80     
0      128    
-288   0      
48     0      
-16    -16    
-80    -16    
80     16     
-32    96     
160    192    
-752   96     
64     -144   
16     32     
128    -240   
160    16     
32     80     
-496   48     
-144   32     
-880   0      
-32    0      
48     64     
-48    0      
-16    32     
-128   0      
112    0      
-96    32     
-640   -48    
0      64     
-32    -64    
-560   0      
16     176    
-336   16     
-272   16     
-544   -64    
80     48     
-800   64     
-48    0      
-16    -112   
-112   112    
96     48     
64     352    
32     -144   
-160   48     
-16    -240   
-272   -192   
-48    0      
80     -400   
48     -112   
-64    224    
0      160    
-352   336    
48     192    
144    192    
-96    0      
-80    -48    
48     32     
-128   -128   
64     48     
80     272    
-80    256    
176    64     
-112   272    
352    368    
-544   0      
48     256    
-592   -64    
-112   -112   
-720   -16    
80     -16    
-80    -64    
0      64     
64     -32    
-64    128    
-16    -32    
176    864    
-208   -32    
16     -448   
-48    256    
-112   256    
48     -288   
16     64     
-32    144    
-400   0      
160    400    
-208   -208   
16     80     
-32    16     
-16    128    
-16    -16    
-32    0      
-144   240    
16     -112   
96     48     
-64    112    
16     176    
64     240    
-64    160    
-128   272    
-352   -304   
-592   -80    
16     544    
176    384    
-144   -176   
0      -16    
64     176    
-240   -112   
176    64     
-32    144    
96     112    
-64    16     
-304   -288   
336    16     
-480   -96    
48     -80    
-384   80     
0      -32    
160    -160   
-288   -96    
448    288    
-240   192    
336    80     
-32    160    
176    -80    
144    -256   
-128   432    
208    -272   
-128   208    
-48    -128   
64     80     
-352   32     
-208   64     
-16    -752   
368    608    
-128   512    
-32    -656   
208    544    
-112   240    
-80    -32    
-480   -832   
-32    -544   
336    880    
-368   -96    
208    -448   
128    448    
176    336    
-368   -560   
144    144    
80     32     
0      80     
-32    112    
16     0      
-144   -128   
-128   144    
224    96     
-224   16     
-48    -32    
16     -48    
-64    160    
32     432    
-16    -80    
-240   -384   
160    -368   
160    528    
-144   128    
128    -176   
-32    32     
-32    192    
80     -272   
-96    -416   
336    560    
-304   64     
-288   -496   
192    -288   
-176   688    
240    32     
-32    0      
16     288    
16     -320   
0      352    
352    624    
-352   -208   
-96    -864   
112    -832   
144    80     
-96    672    
416    736    
-304   96     
16     64     
176    112    
144    64     
-128   -96    
208    96     
32     96     
96     112    
-16    48     
112    48     
16     80     
208    192    
-256   -96    
-96    -144   
256    -80    
192    288    
-80    0      
48     -48    
32     -144   
96     80     
-48    48     
144    240    
-32    400    
-64    -48    
32     32     
96     192    
-256   -176   
32     176    
0      176    
-48    16     
48     96     
-240   32     
96     224    
80     -48    
0      -64    
16     48     
-16    -80    
128    -384   
80     240    
80     176    
-32    288    
144    464    
-64    -128   
-80    -304   
16     -128   
-16    64     
64     -320   
-96    -480   
160    -32    
-32    80     
160    272    
-96    112    
-16    16     
-144   240    
-16    32     
288    32     
112    48     
16     128    
-32    256    
-112   -96    
144    208    
-64    192    
-80    -288   
176    0      
-96    80     
64     160    
-16    144    
-112   128    
-32    96     
-80    -48    
48     -16    
0      80     
-80    -112   
48     176    
-16    144    
272    -32    
0      -96    
128    -336   
32     48     
-32    16     
112    96     
96     80     
16     0      
-128   48     
48     112    
-48    -64    
-160   176    
96     -32    
-32    144    
160    96     
16     -160   
-64    -176   
272    -464   
0      48     
208    -368   
-128   48     
160    64     
-80    32     
96     192    
-16    64     
0      16     
48     192    
0      48     
256    352    
-176   160    
-112   -384   
160    -368   
-192   -400   
336    16     
32     0      
192    336    
-48    80     
128    112    
-160   -224   
64     16     
176    272    
80     64     
-336   -144   
-48    -96    
80     192    
48     -128   
48     128    
208    128    
352    288    
128    -368   
144    64     
16     -416   
-112   -96    
160    160    
80     48     
80     80     
176    144    
-288   -112   
304    -176   
128    144    
-112   -16    
64     -16    
-16    -112   
272    160    
-144   -304   
64     208    
112    112    
0      96     
-128   32     
176    48     
16     112    
0      16     
-32    -64    
272    96     
-64    80     
-64    -512   
16     176    
80     -304   
-48    0      
-48    -64    
304    304    
-96    -144   
32     80     
144    48     
48     112    
64     96     
-16    112    
144    112    
80     32     
0      112    
144    -96    
32     144    
0      -32    
16     96     
208    192    
-144   224    
144    144    
224    128    
-96    -48    
64     -2016  
32     32     
-624   -64    
-96    -624   
32     48     
0      -336   
-48    48     
224    96     
80     144    
-208   80     
-64    -400   
64     32     
112    0      
-288   -720   
160    32     
32     80     
-64    -48    
-224   -224   
16     -352   
80     -96    
80     -128   
176    48     
112    -64    
-32    -192   
48     -1952  
-48    -80    
-80    -16    
48     -80    
144    0      
-112   -112   
64     -256   
-48    48     
80     16     
-128   32     
-48    -112   
256    48     
-144   -112   
128    -560   
-32    -144   
176    -416   
16     -96    
-16    -96    
80     -16    
144    -144   
64     112    
-32    32     
176    64     
-144   192    
-16    128    
-128   64     
16     -128   
-112   -16    
160    -368   
400    160    
-80    144    
0      48     
-64    -272   
-224   -160   
64     -160   
-48    -256   
64     -48    
192    48     
-112   -32    
112    -80    
-400   -112   
128    -96    
-80    64     
64     -16    
288    272    
-16    64     
144    112    
-48    -1712  
176    -320   
0      -176   
48     176    
96     80     
-48    64     
-96    -272   
0      -224   
-80    112    
64     112    
-656   112    
-144   -528   
-16    256    
-80    -176   
192    384    
144    -208   
-48    32     
48     -48    
-176   240    
176    -96    
-112   176    
16     -48    
80     32     
144    -32    
48     32     
-48    48     
-32    -288   
-720   96     
48     -144   
-128   80     
80     -336   
112    80     
112    0      
48     -176   
-96    320    
144    -144   
-144   -64    
272    -160   
-528   -256   
96     -448   
-112   240    
0      -96    
-208   -80    
48     -112   
-16    16     
128    -848   
224    416    
-656   -208   
272    -224   
-48    -64    
128    192    
-208   -96    
48     80     
-96    64     
64     240    
0      -128   
288    -16    
-560   -352   
112    -384   
0      480    
352    -448   
112    128    
-16    112    
272    48     
-256   256    
352    -96    
-192   272    
-128   -560   
144    16     
-32    432    
-208   -448   
320    160    
-160   336    
-768   -224   
-192   0      
-304   32     
32     96     
64     0      
-176   -80    
256    496    
-432   -160   
96     272    
64     -128   
-112   -224   
16     -48    
-64    48     
-1280  -80    
224    112    
-368   -480   
-32    416    
128    -160   
48     160    
-304   128    
-96    -624   
128    592    
-176   1296   
-80    -224   
-1088  -640   
16     -80    
48     -32    
-224   464    
-144   -320   
-80    -64    
-80    384    
48     -80    
-64    336    
-352   -336   
16     896    
-224   -528   
48     1344   
-64    -464   
-144   96     
-448   48     
240    320    
-608   -800   
128    -256   
-32    272    
304    320    
-272   240    
80     -80    
-256   112    
48     -32    
-112   16     
16     0      
320    256    
-432   256    
-80    -336   
-496   128    
192    -80    
-944   -384   
384    208    
-256   -32    
32     -160   
-224   -64    
80     224    
-112   112    
0      320    
144    -192   
-160   240    
-16    64     
-48    0      
112    32     
-208   64     
96     112    
-416   -560   
48     -256   
-112   432    
-176   -144   
0      -176   
208    192    
-112   80     
64     -48    
80     -80    
-208   -176   
224    160    
-128   32     
-16    64     
160    32     
-32    80     
-256   -64    
48     80     
-1600  -64    
80     64     
128    736    
96     432    
-96    96     
-128   80     
32     -64    
-80    336    
240    160    
-192   96     
128    96     
-208   -160   
0      -96    
-144   -96    
64     16     
-288   -16    
-32    -320   
128    -128   
112    112    
-240   64     
64     0      
64     32     
32     112    
16     64     
0      96     
-16    -16    
-272   -256   
96     0      
0      -48    
64     176    
0      32     
-128   -560   
160    112    
-144   0      
128    64     
64     96     
48     64     
-128   192    
256    80     
-256   48     
96     48     
-256   -48    
208    64     
-192   -96    
368    192    
-176   -96    
240    304    
-208   80     
-80    -48    
-80    -48    
192    80     
-48    64     
-128   96     
32     64     
144    64     
-192   80     
-160   48     
-112   176    
-64    -16    
16     160    
0      160    
0      144    
-64    32     
96     64     
160    128    
-48    112    
0      -80    
160    -48    
-96    112    
-16    112    
160    48     
-128   0      
96     48     
-208   0      
64     112    
32     -32    
112    176    
0      176    
-48    -96    
48     0      
128    -48    
16     64     
192    240    
208    -96    
-192   -112   
192    160    
-224   -64    
304    224    
-256   176    
128    224    
144    -64    
0      48     
176    144    
-96    176    
16     272    
-160   16     
176    192    
32     -144   
-368   -144   
-16    -144   
-176   16     
-64    192    
-64    240    
-112   128    
32     192    
-16    64     
-336   -32    
112    496    
-112   240    
-112   128    
-64    -32    
48     -80    
304    0      
144    352    
80     -96    
160    -96    
160    320    
768    304    
-128   128    
352    48     
336    144    
-80    80     
48     32     
336    192    
-112   64     
160    64     
-96    144    
0      64     
-96    160    
-96    -64    
112    -32    
-96    -192   
384    224    
128    128    
0      -304   
96     48     
-80    112    
144    176    
64     144    
128    48     
-64    -16    
-32    -64    
288    -48    
64     192    
64     144    
224    336    
-432   -144   
112    -288   
144    128    
128    -48    
-96    0      
144    96     
-32    80     
112    96     
-32    16     
144    0      
176    112    
112    144    
48     112    
0      -64    
96     32     
-144   -16    
96     32     
176    128    
48     112    
-32    64     
64     32     
128    64     
0      144    
16     80     
-48    80     
-64    -48    
80     -368   
160    224    
-64    -128   
-96    -80    
288    160    
112    -80    
-128   112    
-32    -240   
32     32     
-16    -512   
176    224    
208    192    
-64    -16    
0      -112   
-16    48     
80     -208   
-208   -304   
224    -432   
-112   128    
336    336    
-112   -48    
32     64     
64     -48    
304    112    
16     -432   
96     80     
48     -272   
0      96     
-144   -224   
80     -432   
160    -16    
272    144    
-272   -784   
304    192    
16     448    
48     -64    
0      -128   
192    80     
0      32     
-48    -448   
208    -96    
16     32     
48     16     
32     -64    
224    192    
-16    400    
176    -96    
80     -16    
-240   -160   
224    -16    
32     -288   
64     240    
-192   -1216  
320    -48    
-144   -304   
-32    -48    
160    -128   
64     272    
-96    112    
144    -32    
0      64     
48     304    
32     608    
-208   -496   
-112   -992   
32     -384   
224    464    
-64    -64    
0      48     
144    -272   
0      80     
16     -592   
-64    -64    
208    -64    
112    240    
-16    128    
64     80     
64     -80    
48     32     
96     80     
-16    -16    
48     96     
16     -80    
144    -32    
-32    -80    
192    48     
-48    -176   
176    -352   
528    416    
-192   -432   
16     160    
-624   32     
240    -864   
-192   -672   
352    -1584  
-32    208    
288    -656   
80     304    
208    288    
16     -256   
-192   208    
432    -32    
-288   -96    
-176   -192   
-96    -320   
0      48     
-544   96     
-48    -144   
16     -352   
-32    -192   
400    -304   
0      -48    
800    576    
-640   -656   
-16    -800   
32     -336   
32     112    
80     -16    
-48    -288   
192    -112   
-16    -320   
-160   208    
64     240    
64     -128   
96     -256   
16     -80    
0      -496   
-96    -352   
-64    -1408  
208    304    
-80    96     
64     176    
-112   -336   
-112   -256   
320    -80    
16     0      
208    -112   
-32    160    
-208   -80    
-64    -544   
208    -224   
128    208    
-32    -320   
448    128    
-48    624    
240    192    
-128   -64    
160    -144   
-288   160    
-256   -384   
80     16     
-192   64     
192    -208   
-496   496    
-144   -720   
-224   -144   
-48    160    
192    192    
-80    -160   
16     64     
160    -896   
208    432    
-32    480    
-64    -368   
160    -16    
160    96     
-80    -80    
-48    0      
288    224    
-224   144    
-48    128    
64     -48    
144    288    
-192   -32    
16     384    
192    16     
-16    400    
128    96     
-80    -32    
-208   -160   
272    -144   
-224   -112   
-112   -176   
-464   -64    
64     -96    
-1136  -240   
128    -288   
-1808  -560   
-48    -624   
128    -32    
0      -240   
96     0      
-64    -1184  
96     -96    
-128   -432   
208    -192   
32     -128   
-96    224    
-112   96     
144    304    
-96    -48    
-64    -400   
-112   192    
48     -80    
-32    176    
208    -128   
0      96     
144    0      
-48    -192   
-144   -288   
192    -368   
-48    -496   
48     -688   
-320   -176   
224    -256   
-80    -32    
208    160    
-32    160    
0      0      
64     128    
-240   -176   
-48    48     
-96    -112   
48     48     
112    0      
-80    -80    
272    288    
-80    208    
-112   64     
-32    -96    
112    0      
0      64     
240    352    
-1632  -352   
144    64     
-608   -160   
-80    -80    
32     -16    
160    144    
-160   272    
-1248  96     
16     -32    
-48    -64    
-16    -112   
176    64     
-32    16     
-656   -144   
64     80     
-32    16     
-160   144    
-272   16     
-240   -32    
0      96     
-272   16     
-32    0      
-160   -16    
-32    -32    
-384   16     
64     96     
80     -96    
-128   64     
-16    -64    
160    96     
-128   -32    
144    80     
-32    16     
32     -16    
-112   48     
0      -32    
-176   0      
-240   -64    
0      64     
-432   80     
16     48     
-32    -96    
64     128    
-64    16     
-32    384    
208    496    
176    352    
-176   -320   
-112   -560   
32     -32    
96     320    
48     320    
-160   -48    
112    160    
-304   0      
48     80     
-592   16     
176    80     
-96    32     
336    96     
-192   -160   
-64    16     
0      64     
-32    48     
-16    32     
-32    96     
-48    48     
-224   -128   
160    64     
-128   -32    
48     112    
-336   0      
-16    -32    
-32    -112   
144    32     
-144   -624   
-96    16     
64     -16    
32     352    
-576   48     
64     -176   
-320   112    
-224   -96    
-48    -16    
-16    64     
64     16     
-432   -112   
16     32     
-2096  -16    
592    448    
-80    112    
112    -80    
80     96     
64     64     
-96    176    
-128   128    
32     48     
48     80     
-16    112    
-144   -160   
-128   80     
-16    -48    
-80    64     
-400   0      
224    144    
-160   288    
-192   64     
32     80     
-64    336    
272    -48    
-224   32     
208    80     
-96    -64    
48     16     
-256   16     
32     -48    
-176   128    
320    64     
-272   -32    
-192   112    
-16    48     
-288   -64    
80     -96    
48     112    
32     112    
-96    80     
-128   16     
96     16     
-32    -48    
-240   -16    
240    96     
-160   80     
32     96     
-208   -48    
-160   80     
240    -16    
-96    0      
176    16     
160    176    
-80    64     
144    80     
-112   16     
16     -32    
80     -48    
-128   -96    
160    48     
32     48     
16     96     
-16    80     
176    128    
-144   112    
48     -112   
-16    16     
144    32     
0      48     
112    64     
-96    160    
-16    144    
-64    0      
-64    112    
0      -64    
-224   -80    
112    16     
-32    112    
176    80     
-96    32     
112    288    
80     464    
0      128    
-128   304    
16     272    
16     -240   
-48    192    
64     -96    
-176   -144   
336    496    
-336   16     
112    16     
80     -128   
48     176    
80     752    
-272   -592   
272    16     
-160   128    
192    32     
-80    80     
-64    96     
320    80     
-112   64     
32     0      
-16    80     
0      -32    
-32    96     
272    208    
-400   96     
176    -176   
320    176    
-240   -160   
272    -320   
-144   288    
-32    112    
128    16     
-112   80     
160    640    
-16    -80    
-64    272    
-64    64     
64     -16    
-128   -48    
96     -112   
-80    0      
0      16     
48     -96    
16     -64    
96     256    
-64    -160   
96     0      
-144   16     
144    48     
-208   128    
80     208    
-16    240    
-240   -1600  
208    -224   
-80    96     
96     96     
-192   -208   
-128   -992   
128    -480   
128    0      
-240   -352   
160    -208   
0      288    
48     192    
80     96     
-48    0      
16     32     
-32    -160   
192    128    
-112   48     
256    0      
-112   80     
112    0      
32     144    
224    112    
-64    48     
208    160    
-16    592    
224    288    
144    208    
-32    208    
64     352    
96     -320   
208    272    
-144   48     
128    96     
-48    1152   
608    736    
-240   144    
80     112    
-416   -544   
304    -208   
-336   -560   
368    -192   
64     -352   
176    -112   
784    384    
-32    112    
208    -64    
-128   -1488  
240    80     
32     176    
208    112    
32     176    
576    864    
-432   -256   
-128   -800   
320    -608   
256    848    
192    64     
64     -224   
288    320    
16     -32    
-128   48     
80     -128   
32     -32    
0      128    
-304   -816   
64     -704   
-64    336    
128    336    
96     -208   
32     80     
-272   -480   
-112   96     
96     -160   
144    544    
80     176    
-176   -480   
-304   -1104  
160    -416   
-32    -1312  
96     -144   
176    -208   
-48    -192   
48     -16    
-64    256    
384    240    
288    -64    
96     144    
48     96     
192    -160   
-80    -368   
352    208    
-128   -48    
-96    48     
-192   -384   
-96    64     
256    0      
-64    48     
16     96     
80     160    
-16    144    
176    464    
80     160    
64     -64    
224    176    
-80    0      
256    576    
64     64     
-16    -32    
144    0      
352    224    
-224   96     
-48    208    
176    0      
-368   -128   
320    96     
16     128    
64     -64    
-112   -192   
272    176    
-112   -128   
64     80     
192    48     
-176   64     
384    -192   
-32    -496   
-16    -160   
112    -368   
192    0      
-752   -224   
64     -16    
32     -48    
-48    -496   
112    -16    
-144   -448   
0      -96    
80     176    
16     -144   
-16    -1344  
64     80     
112    -80    
-32    64     
128    0      
80     -64    
-1056  -288   
192    -512   
128    -64    
160    -560   
-16    0      
0      16     
80     16     
176    -656   
-48    -96    
16     -144   
112    64     
-48    64     
80     192    
-128   -16    
256    64     
-560   -16    
64     -176   
-32    -208   
160    -112   
64     80     
16     -320   
0      -160   
160    -1520  
-80    -96    
96     -112   
-16    160    
224    48     
-112   32     
-192   -64    
160    -64    
64     -16    
-32    80     
-752   -16    
-16    -48    
224    -16    
64     -144   
-80    48     
144    112    
192    112    
64     -112   
128    176    
176    -128   
-48    32     
64     16     
96     -16    
-64    -96    
80     -272   
-16    16     
144    -96    
48     -16    
64     -16    
-256   128    
176    0      
-32    -16    
-16    -1952  
16     64     
112    16     
64     0      
-96    128    
576    352    
-608   16     
192    -160   
-496   16     
304    -64    
-528   -48    
208    -96    
-160   80     
80     -384   
-16    -48    
256    -400   
-16    64     
-64    -48    
336    16     
-192   -128   
80     -272   
-208   -256   
-16    32     
-144   256    
224    240    
-96    192    
-16    16     
224    64     
112    -80    
-64    48     
128    -80    
-16    128    
0      -48    
32     -96    
16     -128   
-256   -16    
16     224    
-320   128    
96     32     
-64    -128   
-192   -16    
16     16     
-32    96     
64     -144   
144    128    
-64    -144   
48     144    
-112   -64    
112    96     
0      -32    
48     -32    
-32    -176   
48     0      
-112   144    
-272   -192   
192    160    
-48    -112   
128    -64    
32     0      
176    112    
-896   -496   
-560   0      
-16    16     
64     48     
80     32     
480    480    
-240   416    
-112   64     
48     -32    
240    -48    
-96    16     
192    0      
112    80     
-240   -96    
-64    48     
-112   -160   
-304   16     
-48    64     
-192   -16    
96     48     
-816   -32    
-176   -16    
352    128    
-304   80     
-16    -144   
208    112    
-352   -32    
112    32     
-304   -112   
64     64     
-112   160    
96     48     
-48    128    
64     -112   
-432   -16    
480    96     
-352   64     
-1120  -80    
-272   96     
128    0      
-144   -80    
-224   -352   
352    240    
-304   -32    
-64    96     
-96    -80    
-32    -64    
-80    -48    
80     16     
-64    64     
-192   -80    
208    48     
-160   96     
0      32     
-624   -112   
336    192    
-320   -48    
64     160    
16     -80    
-208   160    
112    160    
-416   112    
192    -64    
32     48     
96     16     
80     16     
-128   -288   
-592   -352   
16     -272   
-720   192    
32     432    
-208   -144   
64     16     
-48    -128   
-272   48     
96     -160   
-48    240    
-16    80     
32     176    
-96    -112   
64     176    
-240   -192   
-64    336    
16     192    
-592   112    
-48    -112   
-176   -32    
80     32     
0      16     
-112   -112   
96     -272   
-64    288    
48     304    
-144   -272   
-16    -96    
144    240    
-144   -64    
0      48     
-32    -48    
-96    32     
48     128    
-1152  -80    
0      64     
-16    80     
16     80     
16     96     
0      16     
16     64     
-48    32     
48     96     
-192   -240   
176    -64    
16     192    
32     16     
-288   224    
240    80     
-1104  0      
64     64     
-80    48     
-32    16     
-96    32     
-160   64     
-80    32     
-112   0      
64     144    
-160   80     
128    400    
-192   -64    
-16    112    
-80    -64    
80     144    
-304   80     
-64    32     
-16    192    
32     -64    
0      -48    
160    -64    
-96    16     
112    64     
96     112    
-128   80     
48     64     
-192   80     
272    176    
-160   576    
96     336    
320    -80    
288    352    
16     160    
64     32     
144    160    
48     48     
-16    64     
-48    -128   
0      128    
-176   -80    
96     160    
-144   -48    
160    144    
-112   -32    
16     144    
112    16     
16     480    
144    176    
-96    624    
80     -16    
-160   -160   
-32    0      
-128   -288   
80     144    
80     -80    
-144   0      
-160   -48    
-80    -784   
64     -992   
384    1104   
-64    160    
144    -368   
240    448    
-112   16     
256    0      
-144   16     
-80    48     
288    560    
-16    480    
192    -112   
0      128    
64     0      
-128   32     
144    -176   
-80    -16    
-64    272    
144    -80    
0      -224   
80     -224   
-64    -80    
128    80     
-80    -64    
128    -32    
64     112    
128    240    
-192   48     
16     0      
-160   -320   
224    -688   
96     -48    
256    192    
0      32     
256    144    
64     368    
128    416    
-48    96     
320    352    
-304   16     
64     48     
-400   96     
464    64     
-160   32     
176    144    
-80    128    
240    192    
-464   -80    
496    -112   
-368   -16    
656    368    
-96    96     
64     -32    
128    80     
384    480    
-560   144    
176    64     
-240   192    
224    96     
-416   -256   
320    128    
-32    -880   
-64    64     
-128   0      
160    32     
-128   0      
160    112    
-96    144    
0      160    
112    160    
48     256    
-256   48     
112    176    
0      -32    
32     -576   
-224   -16    
176    -592   
48     48     
-16    16     
-64    -64    
240    128    
0      112    
80     64     
0      96     
64     -48    
0      144    
32     -144   
32     144    
144    192    
-112   -416   
176    64     
-16    -224   
-16    64     
32     80     
64     208    
144    192    
-96    48     
160    -16    
-32    48     
-64    32     
-96    48     
-16    64     
-80    -32    
48     96     
16     -48    
96     80     
-64    -64    
-96    48     
-80    -208   
192    160    
-80    -288   
96     128    
80     16     
144    64     
-144   16     
192    160    
-16    240    
-128   32     
256    80     
-48    -80    
192    48     
-64    -304   
192    112    
160    96     
144    272    
-224   0      
-64    112    
144    -112   
224    80     
-256   -48    
80     48     
16     -16    
80     -64    
-64    -80    
352    -192   
-64    272    
176    -128   
-192   32     
512    -32    
-304   160    
144    64     
80     0      
0      32     
240    48     
-32    80     
224    128    
48     224    
0      -80    
-32    80     
144    -32    
0      16     
80     48     
208    112    
-32    -16    
112    192    
-96    -752   
80     -16    
64     112    
48     112    
-48    96     
0      128    
64     128    
128    -112   
-64    80     
160    -128   
112    112    
0      -160   
-16    112    
-128   -160   
144    80     
80     -240   
64     144    
64     112    
64     -368   
-80    0      
48     144    
144    -272   
-32    -64    
176    32     
-32    -176   
192    96     
16     -80    
48     64     
-112   -32    
224    256    
0      96     
272    -1280  
-304   16     
368    -304   
-208   -160   
-464   16     
48     -192   
96     -112   
128    -544   
-16    0      
80     -1280  
-16    0      
112    176    
272    144    
-144   96     
96     32     
0      -208   
64     16     
96     -32    
-48    -16    
-1024  -128   
-64    -208   
256    -144   
-176   -224   
32     -32    
-96    -192   
160    0      
-64    -3216  
32     -112   
-128   -416   
-48    -32    
96     -64    
32     64     
-48    32     
-32    -80    
-496   -112   
192    -32    
-320   32     
96     -80    
16     64     
32     -192   
16     -64    
-144   -1312  
288    240    
-192   384    
-160   208    
-112   -128   
160    0      
16     -160   
-64    -368   
448    128    
-368   80     
-16    64     
-304   -48    
256    0      
-80    -272   
144    0      
-16    -288   
112    192    
112    192    
-16    -64    
192    48     
-160   128    
-304   -240   
-80    -368   
-48    -128   
464    -32    
-736   -48    
352    -32    
-288   -16    
400    144    
-240   144    
176    -448   
-304   32     
496    -1136  
144    96     
160    -16    
-160   96     
112    128    
-432   -256   
-32    32     
-160   -160   
-304   368    
96     480    
-640   336    
48     96     
48     -32    
80     -320   
-64    -64    
304    -672   
-32    160    
224    112    
-32    -16    
288    160    
-112   -256   
64     176    
-32    128    
0      -96    
160    368    
-144   -144   
-64    -208   
-320   -112   
48     -256   
48     96     
-48    -128   
144    80     
-128   16     
240    0      
-240   -320   
288    448    
-288   176    
-304   -608   
304    -80    
-176   0      
32     16     
112    48     
48     48     
0      -448   
-32    192    
32     -464   
144    -368   
-256   -96    
400    48     
-240   352    
192    -64    
-64    -96    
-32    64     
-128   -96    
112    64     
-352   304    
-144   240    
-160   -400   
-16    -544   
80     -48    
-304   32     
-1552  -144   
-240   64     
80     -32    
-16    0      
64     112    
48     16     
32     -64    
-128   0      
144    32     
-80    32     
-32    -48    
32     80     
-32    -192   
240    112    
-192   464    
48     384    
-32    304    
-192   32     
-96    48     
-1008  -48    
-80    -80    
64     128    
-16    -16    
-48    -224   
-32    -48    
-320   -48    
-144   16     
-144   -192   
-48    32     
0      96     
-16    96     
-16    -32    
-144   16     
-96    160    
-192   16     
48     112    
-864   192    
96     656    
128    272    
-80    -384   
-240   -304   
-48    -16    
32     -96    
176    288    
-32    224    
-48    432    
704    944    
-416   912    
160    208    
-480   96     
160    -336   
-368   -160   
96     -80    
-1008  -32    
64     128    
32     -16    
64     48     
-160   -96    
0      224    
-320   -912   
32     -16    
-96    160    
0      -32    
-48    192    
-16    64     
-208   -1168  
-96    -208   
-112   944    
-656   -688   
48     -32    
96     224    
240    304    
-144   -32    
-32    -128   
96     592    
-176   32     
-16    -320   
64     -144   
-64    96     
160    368    
-144   64     
-256   -240   
112    -192   
-256   -112   
128    192    
-64    128    
112    128    
-16    64     
-16    512    
176    288    
-160   0      
176    144    
-16    -16    
-144   -64    
-80    -64    
64     240    
-96    16     
48     352    
-128   0      
16     -32    
-1536  -48    
160    336    
-224   224    
-144   112    
128    -16    
176    32     
-224   -64    
144    -320   
-368   -32    
384    192    
0      288    
96     224    
-208   64     
-64    128    
32     208    
-608   -48    
32     -112   
0      64     
112    48     
-16    32     
-80    -32    
48     32     
160    144    
-80    32     
-64    32     
112    112    
-224   -288   
288    -48    
160    -16    
48     96     
-96    64     
32     -64    
128    128    
-160   32     
272    -208   
-400   384    
528    -112   
-288   240    
240    240    
-208   128    
48     192    
-208   48     
-80    112    
-224   -16    
272    240    
-160   80     
-32    -64    
-96    -32    
336    160    
-336   144    
64     48     
-48    16     
-32    160    
-32    16     
-160   -16    
48     0      
0      -64    
80     -16    
-144   16     
128    112    
112    64     
-96    32     
144    48     
-128   -32    
-96    -64    
144    144    
-96    16     
48     0      
-16    48     
48     80     
-16    112    
32     96     
64     256    
-32    0      
-32    112    
32     48     
144    96     
-64    -32    
176    -48    
112    96     
128    32     
80     64     
0      32     
-16    48     
32     0      
-256   -224   
176    -64    
-96    144    
272    32     
-16    80     
80     96     
112    64     
-80    16     
128    64     
-128   48     
208    224    
32     -48    
-32    -80    
112    192    
96     64     
-144   224    
80     208    
144    80     
-32    32     
-16    64     
-96    -144   
432    -32    
-192   288    
144    80     
-112   0      
48     -48    
96     96     
-80    32     
0      96     
-80    0      
112    0      
-80    128    
320    0      
-128   128    
-80    -32    
80     0      
112    -16    
-96    80     
64     112    
48     48     
-16    -16    
144    80     
-80    32     
32     128    
-80    128    
128    112    
-80    0      
48     -320   
192    144    
-96    -176   
-80    256    
112    112    
-32    96     
32     96     
48     16     
-96    -32    
48     48     
-48    112    
48     176    
-64    32     
160    48     
-32    48     
-64    -496   
128    96     
96     -640   
96     32     
-64    160    
80     64     
-128   112    
160    64     
-240   32     
80     80     
-48    80     
96     112    
32     48     
48     48     
16     -32    
-80    -48    
208    -80    
0      -192   
-32    -112   
112    -96    
0      96     
144    32     
-96    48     
240    48     
80     96     
160    384    
400    592    
-496   32     
32     -176   
176    224    
-16    -96    
-160   -384   
-144   -656   
176    -64    
0      -448   
160    -32    
-144   16     
80     16     
-160   192    
208    48     
-128   -160   
128    64     
80     0      
160    144    
-240   -176   
128    -208   
176    208    
64     -224   
0      -32    
32     -832   
160    80     
192    -272   
96     80     
32     -48    
16     16     
64     -128   
304    384    
-240   48     
112    -32    
-224   32     
-48    -80    
-112   -48    
-144   -368   
144    -384   
-128   -560   
128    304    
-64    -336   
-16    144    
144    -48    
-64    160    
48     144    
64     160    
96     144    
192    -272   
320    592    
-144   -48    
-80    -96    
0      -400   
-96    272    
96     -64    
96     208    
-96    -256   
288    192    
-112   336    
-64    64     
160    -240   
-48    -112   
48     64     
64     80     
176    224    
-80    -80    
160    -64    
176    -144   
160    272    
144    352    
-80    320    
176    -688   
464    576    
-400   -96    
240    -1296  
-32    144    
-112   -272   
80     -656   
-32    272    
304    -1968  
-80    -64    
144    224    
-336   -96    
672    592    
-512   -160   
160    -848   
80     64     
160    128    
-160   128    
96     -272   
96     -128   
-1632  -80    
176    -256   
96     -144   
-48    -1136  
64     -176   
-64    -240   
80     -192   
272    192    
-192   -368   
96     16     
-208   -160   
-80    48     
208    80     
160    -80    
16     688    
-352   -160   
-112   32     
208    -16    
-288   -416   
192    48     
112    112    
-112   -128   
240    -448   
-32    -160   
144    -224   
-16    80     
112    -48    
64     240    
32     192    
-80    -368   
16     -256   
32     -224   
-288   -224   
192    -144   
-48    -128   
448    -112   
-368   -64    
144    -704   
-160   48     
-112   -32    
48     64     
112    96     
16     48     
-224   -80    
64     -176   
-96    -80    
0      -80    
-288   192    
144    336    
64     160    
144    576    
112    560    
-160   -144   
16     112    
-128   -512   
32     -240   
-16    -112   
144    192    
-224   -384   
96     -16    
64     96     
0      144    
-528   -720   
128    -16    
-32    208    
-304   -64    
512    -352   
-128   384    
192    80     
0      -1424  
32     304    
208    16     
-64    -208   
96     0      
144    144    
-64    -352   
-16    -864   
-352   160    
-96    -528   
-32    96     
192    208    
-256   -448   
384    -208   
0      304    
48     -1168  
192    -128   
-64    -32    
48     48     
48     -16    
144    -128   
-384   -320   
-32    384    
-176   -320   
192    -592   
-288   -416   
240    32     
-64    400    
272    -48    
-224   -384   
304    -112   
-48    560    
0      256    
240    -160   
-304   0      
48     -48    
-288   -320   
16     -64    
16     128    
-96    400    
144    208    
-192   -272   
-16    128    
144    -320   
-32    -64    
112    -288   
32     -112   
0      0      
112    112    
-128   112    
160    160    
-112   -48    
64     160    
-64    80     
-32    -256   
-240   -144   
192    -208   
-176   -336   
-240   -288   
144    48     
-1232  -16    
-976   -288   
160    176    
-1424  80     
144    -64    
-192   96     
64     0      
64     -32    
-176   -96    
176    -96    
-240   -16    
-368   -112   
544    432    
-416   -64    
240    160    
-240   128    
304    384    
-144   224    
-144   176    
-128   -128   
-400   -160   
-96    -64    
-16    16     
-128   -240   
-336   16     
-80    48     
-256   80     
48     144    
-96    -96    
272    288    
-224   320    
224    80     
-240   112    
144    112    
-224   96     
-320   -96    
-96    144    
-608   80     
-32    -16    
-288   -64    
416    176    
-448   -128   
144    272    
-160   32     
64     144    
-144   80     
-112   -32    
160    192    
-144   -240   
-32    -128   
-224   -192   
-176   -208   
-464   -288   
-48    -96    
-320   -48    
192    0      
-96    -32    
-208   0      
-32    -304   
64     -48    
-96    -128   
144    368    
-224   -80    
-176   32     
-96    64     
128    32     
-80    32     
-240   64     
-32    0      
-752   16     
-64    112    
-96    -64    
-32    -16    
48     112    
0      16     
-48    128    
48     96     
176    128    
-288   -112   
128    16     
-192   -80    
80     48     
-272   0      
32     80     
-32    -32    
-16    96     
80     16     
-80    96     
96     0      
-96    0      
-16    -192   
-32    16     
160    32     
-288   0      
0      64     
-192   -80    
80     128    
-64    80     
0      128    
-368   -144   
160    112    
-2112  -160   
-112   -32    
-144   160    
144    48     
-144   48     
80     32     
-128   -16    
48     64     
32     64     
336    160    
-192   320    
-128   32     
32     48     
-96    -16    
144    192    
-1328  -320   
192    64     
-32    128    
144    64     
-112   80     
64     80     
16     128    
-64    64     
16     64     
-144   0      
176    128    
-192   32     
64     176    
-192   -64    
160    0      
16     112    
64     112    
-32    80     
-64    16     
0      48     
32     48     
-32    48     
80     128    
-32    32     
-112   -192   
240    -32    
-192   -48    
64     176    
-80    16     
-48    -80    
48     -48    
208    144    
-16    240    
-48    112    
64     64     
48     112    
80     256    
320    240    
-240   208    
0      304    
80     336    
96     144    
-16    -16    
-224   16     
80     -144   
-96    64     
96     -32    
32     144    
80     160    
-112   -32    
48     -64    
-80    96     
176    96     
-160   80     
208    -48    
-64    560    
160    496    
64     64     
0      -16    
-32    -48    
0      32     
144    80     
-96    336    
112    -416   
80     128    
16     144    
-160   -704   
256    544    
-32    -48    
-48    48     
-16    -288   
-176   -64    
64     -96    
96     -96    
256    -112   
176    368    
48     112    
80     -16    
144    144    
-96    48     
48     0      
128    256    
0      48     
-32    -16    
32     -288   
160    224    
16     192    
48     -960   
-16    64     
48     208    
0      -64    
0      0      
-16    -112   
-96    -160   
320    416    
-16    400    
144    32     
-80    -32    
144    160    
48     -176   
208    16     
-16    -64    
-80    48     
16     192    
-32    -656   
208    304    
-48    48     
-64    0      
0      48     
-160   -352   
-16    -128   
16     -16    
-208   112    
240    80     
-336   368    
-208   288    
560    -112   
-352   -336   
272    128    
48     320    
176    -128   
80     192    
560    528    
-608   -16    
256    -544   
208    448    
-64    416    
48     -16    
-144   80     
224    64     
-64    400    
224    -208   
288    336    
64     -320   
32     272    
64     -144   
-64    -192   
320    512    
0      304    
-80    -80    
-48    176    
128    -176   
560    496    
-432   -112   
-32    -160   
176    -64    
-48    -32    
-96    -320   
32     32     
80     -144   
-48    112    
0      144    
112    240    
192    -48    
-192   16     
176    64     
16     64     
32     48     
112    432    
-240   80     
160    -496   
112    304    
-368   -48    
304    384    
-208   -656   
-32    48     
144    -832   
-16    -160   
224    -96    
-80    272    
112    -16    
176    176    
352    384    
-320   416    
0      -64    
304    160    
-144   48     
96     -144   
96     80     
-336   -800   
496    256    
-240   432    
368    320    
-16    -320   
-144   -48    
128    -368   
-32    336    
-144   -320   
48     -16    
192    384    
-64    -160   
32     128    
144    -1040  
-32    80     
80     -336   
112    112    
32     -160   
0      96     
-32    -16    
128    240    
80     -192   
112    -288   
-64    -400   
144    -128   
272    480    
-112   -544   
336    144    
-32    -48    
128    416    
208    16     
-112   -112   
208    16     
-80    240    
112    -480   
256    544    
-288   -416   
80     -112   
16     -304   
-16    -560   
112    128    
80     80     
272    352    
-32    176    
32     320    
160    128    
0      240    
32     -32    
160    144    
-48    288    
80     -576   
336    256    
-48    -256   
32     -80    
-96    -32    
48     -1056  
304    80     
128    -832   
48     -368   
96     -112   
160    -320   
224    128    
-240   -32    
64     0      
64     0      
160    -560   
-160   48     
64     -544   
0      -64    
-912   128    
256    112    
160    -48    
80     -160   
-32    -144   
448    80     
-336   128    
224    192    
-96    48     
192    16     
32     32     
64     -16    
240    608    
-128   112    
368    -32    
-64    0      
64     -448   
112    -48    
96     -416   
-32    48     
112    -560   
112    64     
112    -720   
208    -16    
-48    32     
64     0      
32     112    
224    144    
-224   -96    
112    -224   
-208   -80    
-48    -320   
-16    -96    
64     -144   
128    80     
-32    -64    
192    -144   
0      -592   
0      96     
16     16     
-64    16     
64     64     
176    0      
-96    0      
64     16     
-16    368    
624    256    
-816   64     
288    -64    
-128   -64    
192    -160   
-128   -544   
80     -208   
64     240    
176    0      
80     16     
48     48     
272    128    
-80    112    
-48    -96    
-80    -32    
160    -64    
-32    176    
176    48     
16     320    
-96    -48    
-160   16     
-176   -224   
-16    112    
112    -128   
-192   176    
-80    -80    
16     -112   
16     -16    
-80    -272   
256    -368   
-80    -336   
-80    -160   
32     -336   
32     -208   
208    80     
-144   192    
128    -32    
-144   128    
144    -480   
-320   -96    
336    96     
-192   128    
-48    -32    
-128   16     
48     64     
0      -48    
-128   0      
48     96     
-96    16     
48     -32    
48     64     
112    -112   
-48    64     
128    -96    
16     -144   
-160   80     
112    -80    
-16    0      
-16    -32    
96     0      
48     -32    
-32    48     
0      16     
304    -64    
0      -304   
0      80     
96     16     
-176   -48    
-80    -368   
64     112    
128    16     
-80    32     
-80    0      
112    16     
0      -48    
16     16     
-16    48     
144    -144   
-656   -240   
160    -208   
16     96     
-448   -128   
64     96     
-48    64     
-80    -32    
-112   -32    
-256   128    
16     64     
-64    96     
-64    16     
0      0      
48     -16    
-80    16     
32     144    
-208   -128   
-32    32     
224    -48    
-80    48     
-16    -16    
-272   16     
-144   96     
160    96     
-96    64     
-560   64     
-96    -240   
-64    -352   
352    96     
80     112    
-16    96     
32     64     
0      48     
112    -320   
-144   -96    
0      -272   
-32    272    
-32    -96    
-112   -128   
160    336    
-160   -16    
-48    16     
-1200  16     
-16    -16    
64     48     
48     224    
-128   -432   
-32    -320   
-32    -400   
64     144    
-32    64     
-16    176    
-48    144    
64     -96    
-160   144    
-16    -32    
-176   -160   
-144   0      
16     -112   
-128   -48    
-16    -16    
144    -176   
80     320    
208    -64    
-128   480    
64     -32    
-144   -48    
-32    48     
-96    -208   
-32    480    
48     -128   
-160   32     
-272   -32    
-80    48     
-496   -80    
96     80     
48     0      
-48    -64    
128    48     
-384   -32    
304    -400   
-64    368    
0      192    
-32    -128   
64     16     
16     144    
-160   240    
-320   -320   
208    -368   
-464   432    
-16    256    
-16    -400   
-32    -96    
-16    144    
16     272    
-48    112    
288    368    
-224   240    
-288   -32    
160    -496   
0      32     
208    288    
-272   -304   
320    64     
448    448    
-224   0      
-800   -128   
192    -176   
-160   -96    
-160   -352   
144    592    
176    256    
-288   -256   
48     64     
-32    48     
-112   -80    
-96    -112   
256    -160   
-16    240    
-80    64     
-208   32     
400    32     
0      224    
-208   32     
64     -32    
-176   96     
144    -256   
16     384    
-304   -256   
-128   -736   
352    688    
-64    576    
-320   -416   
128    -480   
-336   144    
32     272    
80     -80    
-32    592    
-144   -848   
448    -80    
-336   816    
576    0      
-480   -448   
144    -80    
-16    192    
64     0      
240    624    
-528   -240   
-112   -1136  
192    384    
48     240    
128    80     
128    128    
-32    80     
176    288    
16     320    
-160   96     
-192   -544   
240    208    
-160   512    
-208   -16    
144    -96    
-128   -96    
64     16     
-16    -320   
128    160    
16     -144   
32     -128   
0      192    
272    96     
-96    224    
48     96     
32     176    
-48    32     
-192   -48    
0      32     
144    -352   
-32    272    
-48    288    
-32    -48    
176    528    
0      224    
16     32     
16     208    
144    528    
-96    -96    
-96    -112   
-48    464    
-112   -336   
64     112    
64     208    
-144   -96    
128    96     
-80    96     
304    240    
-272   96     
32     -160   
-112   -176   
336    560    
-80    240    
96     80     
96     -48    
0      -16    
0      112    
144    512    
-208   -384   
80     -16    
-112   48     
0      -352   
288    480    
-304   -272   
96     80     
224    48     
-160   80     
-32    0      
-16    160    
-160   16     
144    128    
-208   -48    
128    112    
-240   48     
128    96     
-208   -128   
144    -144   
128    -48    
-80    -192   
64     -80    
-112   -464   
32     -272   
192    -16    
64     64     
0      -16    
128    0      
112    160    
-16    96     
-16    -16    
32     -64    
96     -128   
112    -48    
48     96     
-48    80     
112    160    
-112   0      
0      128    
176    32     
-96    96     
-64    -80    
-32    16     
-64    -496   
144    144    
0      0      
-48    80     
176    96     
16     -320   
48     80     
-16    -560   
112    128    
48     112    
48     416    
112    224    
-208   16     
128    32     
160    192    
0      80     
64     160    
64     80     
48     -176   
-144   160    
224    -304   
-48    96     
112    -272   
-48    32     
96     -64    
32     16     
16     80     
240    288    
0      224    
-176   128    
128    -336   
112    -224   
304    96     
-288   -48    
304    96     
-144   64     
384    320    
-400   -48    
112    -112   
-128   -352   
128    80     
-112   208    
64     240    
-96    16     
64     96     
-128   288    
368    464    
-128   368    
240    -48    
-64    160    
48     -64    
112    80     
-160   -32    
288    192    
-112   -624   
240    -32    
-176   -704   
192    176    
-64    0      
-224   -272   
80     -320   
240    112    
96     48     
-48    16     
96     80     
32     -112   
80     144    
208    80     
112    16     
48     -48    
-48    304    
416    -16    
-64    176    
208    32     
-64    0      
-96    16     
176    -16    
48     144    
-16    -448   
64     144    
0      64     
-64    -32    
112    32     
160    96     
80     -32    
128    112    
64     16     
-64    -48    
144    160    
192    -112   
-32    32     
-32    -224   
160    -96    
-112   -256   
240    256    
-48    -176   
112    144    
144    -160   
80     144    
368    -240   
-432   128    
256    32     
0      -528   
208    0      
16     -480   
16     -64    
80     -64    
112    -288   
-144   -16    
256    -272   
-208   -48    
144    -112   
96     80     
16     112    
16     -64    
-208   -192   
240    0      
112    -656   
-96    32     
-240   -16    
-144   -96    
-128   64     
-32    32     
48     64     
112    -32    
48     16     
144    -336   
224    112    
-80    224    
160    48     
80     -48    
64     80     
192    64     
-176   48     
-112   -112   
0      -112   
-512   -96    
48     -112   
96     -80    
80     -352   
0      -240   
176    -16    
192    32     
112    -720   
-112   16     
-16    -368   
-80    -384   
96     -192   
176    192    
-112   -80    
192    208    
-608   -80    
-16    -720   
-224   -400   
320    16     
176    96     
-32    -144   
48     -272   
224    -272   
-240   -208   
80     -256   
128    48     
16     -32    
-32    -288   
-32    0      
-16    -80    
-144   16     
-48    -64    
48     80     
-16    -32    
80     16     
32     -288   
-64    -16    
64     -288   
208    32     
-80    -192   
-64    -48    
-176   -64    
160    -272   
-144   16     
112    240    
-208   -448   
64     432    
-304   208    
128    -208   
-368   -80    
0      0      
192    -16    
-96    -48    
128    -176   
0      -96    
64     112    
-64    -96    
16     -320   
112    -32    
144    96     
-384   -128   
176    32     
-544   16     
0      96     
-368   208    
-64    -240   
48     112    
96     -32    
-32    208    
128    -560   
-48    112    
-48    336    
-224   -256   
-208   -272   
0      -112   
-128   48     
64     32     
-48    112    
128    -32    
-112   32     
96     16     
-32    80     
80     -256   
48     80     
80     -672   
48     -48    
-96    48     
96     0      
-192   48     
112    -48    
-128   96     
0      16     
-64    -48    
-16    -416   
-144   -160   
144    -240   
-32    160    
128    -160   
64     176    
-144   144    
-384   128    
16     304    
112    400    
-352   64     
-48    16     
0      144    
-128   48     
-16    32     
-304   -464   
-256   -336   
-112   -304   
-336   -128   
-80    704    
-48    144    
-16    -288   
-32    16     
-272   304    
-1232  128    
80     64     
-48    560    
-80    272    
-128   -480   
96     656    
-704   -352   
176    -48    
-176   304    
32     -368   
-16    -688   
16     448    
96     -48    
-112   272    
-112   304    
-400   0      
112    -192   
-192   32     
-112   48     
-16    -16    
112    -624   
-272   208    
-16    48     
80     -368   
80     128    
288    48     
-128   528    
176    64     
16     -192   
128    256    
0      64     
-256   -176   
144    -80    
192    240    
-288   -128   
-16    128    
192    160    
128    128    
32     -144   
208    80     
-112   128    
-160   -272   
304    32     
-352   576    
512    -208   
-192   -336   
96     720    
64     480    
-176   224    
48     96     
48     112    
-528   112    
0      208    
-48    64     
144    32     
-240   -48    
0      160    
16     208    
48     256    
-224   128    
224    240    
-288   240    
-64    160    
32     128    
-288   192    
-272   48     
-496   -176   
80     80     
-80    -144   
160    48     
32     -64    
112    80     
16     -48    
-96    -16    
32     -64    
16     128    
-48    0      
64     112    
16     48     
-224   -96    
16     112    
-240   128    
48     208    
-80    -96    
16     -16    
-16    -32    
-32    -256   
-96    32     
-16    64     
-16    176    
-112   112    
64     224    
-272   -32    
-32    144    
-288   -752   
-16    -304   
128    96     
32     112    
-96    64     
48     0      
64     96     
0      64     
-48    160    
64     112    
16     144    
144    208    
-352   224    
32     48     
-224   80     
96     336    
-16    320    
-192   32     
48     96     
-16    64     
16     -48    
224    64     
-64    160    
32     -48    
-96    96     
64     -384   
32     -288   
432    112    
-224   304    
-64    16     
-224   -368   
256    128    
-64    96     
-256   64     
64     16     
16     128    
-16    -80    
-48    16     
-48    -32    
-16    64     
-16    -16    
-16    48     
64     96     
-64    48     
48     160    
-224   0      
64     160    
-160   0      
-48    80     
128    160    
80     96     
-192   64     
0      0      
64     128    
64     64     
0      64     
48     96     
64     96     
-368   -80    
256    128    
-256   -112   
32     64     
176    96     
-48    64     
112    144    
96     16     
-192   -80    
320    -48    
-176   80     
80     192    
112    48     
176    176    
-176   128    
80     32     
32     128    
160    16     
-32    48     
96     80     
-32    -16    
-16    -144   
32     -160   
96     0      
80     144    
32     64     
64     192    
16     80     
80     96     
-144   0      
-96    -176   
352    -64    
-16    256    
-96    144    
16     80     
128    176    
80     112    
-32    80     
96     112    
0      -48    
64     64     
-48    -128   
224    32     
-112   160    
304    176    
-368   16     
192    112    
-32    80     
-224   0      
176    144    
0      -16    
224    144    
-96    -160   
192    -32    
16     256    
224    192    
-256   32     
192    80     
-48    -80    
16     112    
-80    64     
0      48     
432    608    
0      -16    
240    80     
-48    64     
96     -64    
128    352    
176    48     
-160   -48    
224    160    
192    288    
64     0      
-16    96     
96     144    
32     -160   
-64    112    
208    112    
-16    -176   
-96    16     
0      96     
176    0      
-64    -16    
64     176    
176    80     
64     144    
-80    128    
96     32     
-144   -192   
336    64     
-96    96     
256    -96    
-368   112    
256    -688   
-16    128    
96     -576   
0      80     
-144   -64    
112    80     
48     112    
112    32     
-80    80     
32     240    
32     128    
-80    -16    
208    48     
-32    -64    
-16    -112   
32     -32    
160    128    
-272   -368   
112    128    
160    0      
-112   176    
-32    -816   
128    48     
240    144    
-304   80     
288    16     
-16    48     
352    192    
-16    -192   
176    192    
80     -112   
48     112    
48     -272   
-80    -64    
224    -848   
-96    176    
192    240    
-96    96     
-16    -192   
96     224    
-16    -128   
-112   48     
112    192    
16     112    
288    272    
-112   320    
-32    -176   
160    32     
96     544    
64     -528   
-64    688    
0      -224   
32     0      
208    512    
0      -240   
144    208    
-224   -1344  
176    128    
16     -240   
-96    352    
64     -336   
-128   -368   
80     0      
80     96     
-96    -32    
0      96     
-32    64     
352    128    
-224   -48    
192    64     
-32    80     
96     -80    
32     112    
240    -96    
-144   -80    
160    -208   
-32    208    
112    16     
-16    -16    
64     -256   
-32    112    
-32    -128   
48     368    
160    176    
-144   -624   
96     -48    
-48    -208   
272    -784   
-96    -320   
128    96     
32     -48    
32     48     
80     -64    
-16    160    
176    -304   
-64    -1184  
48     0      
-80    -528   
256    -272   
0      -832   
80     -672   
128    -112   
-48    -192   
80     0      
80     48     
-96    64     
-128   -224   
-32    -576   
-16    0      
-176   -176   
32     -16    
128    -32    
-48    -160   
80     32     
-288   -64    
32     16     
-192   -128   
176    256    
64     0      
240    -128   
-80    -208   
144    -2448  
-64    -64    
144    -32    
-80    48     
32     -320   
64     144    
48     -272   
-16    -208   
0      -16    
64     -48    
-320   -48    
112    -80    
96     -16    
176    32     
-384   -208   
704    -608   
-64    464    
416    48     
-96    48     
16     -272   
272    -64    
192    128    
128    192    
-80    -272   
192    -112   
-320   -16    
144    -480   
-128   48     
16     80     
0      -48    
160    16     
-352   -720   
-16    -720   
304    -336   
128    112    
-208   432    
304    64     
96     -448   
0      32     
-64    -176   
-464   -272   
-160   -464   
-352   -16    
-240   -48    
64     160    
-432   -576   
400    416    
-272   -112   
-96    -192   
-48    -208   
176    176    
-160   144    
-80    80     
112    -64    
-64    -160   
32     -96    
-160   0      
-176   -64    
-96    -16    
80     -96    
64     -240   
112    -96    
-96    -384   
128    -32    
64     -80    
-304   -448   
176    -240   
16     -64    
16     32     
-80    32     
224    96     
-256   192    
64     144    
-320   112    
-208   -96    
-80    -272   
160    0      
-80    -160   
-112   32     
16     -1248  
48     -48    
-560   16     
32     -80    
-176   48     
96     464    
-144   224    
32     560    
-64    208    
-176   -64    
288    -64    
128    -64    
-192   128    
80     -336   
128    96     
-256   16     
192    320    
-32    48     
128    32     
-112   64     
112    112    
-96    32     
0      -16    
-80    16     
128    64     
-64    208    
48     -112   
48     64     
48     -256   
0      64     
-16    0      
-608   16     
192    208    
-1664  16     
32     64     
16     -80    
-16    64     
144    48     
32     32     
96     -112   
-112   64     
-544   -208   
-96    -16    
-320   -224   
-32    64     
32     48     
-752   -336   
80     32     
-704   -16    
16     -48    
0      64     
16     64     
96     16     
-224   64     
-48    16     
96     64     
-272   -160   
144    224    
-64    -160   
-128   -144   
-48    -144   
-48    -64    
32     16     
-48    96     
-128   96     
48     208    
-240   -176   
-768   16     
64     16     
-208   -48    
-96    0      
64     -256   
192    304    
-256   16     
-128   112    
32     16     
-144   160    
240    0      
-192   48     
80     -32    
-320   16     
176    368    
-432   368    
-240   0      
64     -96    
176    80     
-16    -80    
-96    -96    
-32    80     
-48    32     
-96    128    
80     16     
-48    -16    
-112   0      
-96    16     
-176   -128   
-144   -16    
-176   80     
-144   64     
80     -16    
-128   64     
-80    -160   
64     80     
32     128    
-176   48     
240    192    
96     176    
-224   112    
-16    16     
-64    -80    
64     -80    
-32    16     
-96    16     
-176   144    
-192   32     
64     96     
-320   -16    
64     144    
-112   128    
-16    0      
112    144    
-144   16     
0      192    
208    176    
-48    240    
16     240    
64     240    
-416   -48    
32     144    
-480   -96    
144    80     
-32    32     
128    -64    
64     96     
-32    -64    
-208   80     
-64    -32    
112    64     
-96    0      
64     48     
-112   -32    
-240   32     
-16    -144   
-16    -64    
-272   -16    
0      64     
0      80     
-80    -32    
112    128    
-16    32     
32     48     
48     32     
-16    96     
-96    -16    
144    112    
-48    192    
-96    96     
-96    -16    
-32    96     
64     -32    
-160   48     
112    96     
-144   64     
64     32     
80     96     
480    464    
-304   432    
-144   32     
-32    -16    
80     96     
32     112    
-160   80     
-144   -32    
160    112    
-208   -128   
144    176    
-128   96     
112    96     
-32    64     
16     32     
-16    48     
112    128    
-208   -16    
-32    0      
128    176    
-64    -16    
160    160    
-368   64     
704    512    
-672   400    
-128   -48    
-96    -48    
528    224    
-176   112    
128    320    
-80    144    
96     32     
64     32     
176    96     
96     80     
-112   0      
128    96     
96     64     
240    128    
-128   256    
32     112    
-32    -48    
-16    -32    
128    0      
160    80     
-64    -16    
192    32     
176    128    
16     80     
-144   48     
16     48     
-80    -160   
-160   -240   
0      -256   
-80    48     
-160   -112   
-16    -32    
-32    32     
-144   224    
-112   400    
48     -48    
-192   48     
160    48     
-208   16     
80     16     
-16    272    
160    320    
-208   -144   
16     -352   
592    240    
-352   -368   
224    400    
80     32     
64     144    
-16    96     
0      -224   
-176   -304   
256    496    
-80    -112   
80     -272   
-96    352    
128    -16    
-16    -16    
80     -96    
16     192    
0      176    
256    416    
240    208    
-256   16     
80     256    
160    -48    
-128   224    
192    144    
-96    64     
-128   48     
128    -256   
0      144    
64     64     
-48    -272   
112    64     
192    144    
-128   64     
112    48     
-16    32     
64     64     
208    80     
-160   192    
160    96     
-320   -576   
256    96     
-80    16     
48     -320   
-96    -224   
96     -368   
16     176    
-16    -32    
112    128    
48     256    
160    48     
176    192    
16     224    
-48    -80    
192    -176   
48     -80    
176    128    
-32    16     
96     32     
96     160    
-16    -336   
64     -96    
0      -224   
64     144    
-128   0      
144    144    
-48    288    
64     -16    
-96    -48    
48     -160   
112    -64    
-16    400    
80     32     
96     128    
128    240    
32     -448   
48     96     
80     -384   
-48    0      
192    -1280  
32     160    
-112   -368   
32     48     
224    128    
-112   128    
32     -16    
-64    96     
208    112    
-96    -224   
128    304    
-256   -64    
112    -448   
112    -224   
-160   416    
48     -848   
64     48     
-32    368    
0      -160   
128    96     
-160   192    
-144   -656   
320    -112   
-256   -736   
-16    256    
144    208    
-16    0      
-16    144    
80     -1008  
288    368    
-64    32     
-80    -48    
144    16     
-48    -112   
64     80     
128    176    
96     96     
-16    -160   
144    144    
160    -384   
112    96     
352    304    
-80    592    
-112   112    
-64    80     
0      -128   
32     96     
-48    160    
-32    224    
112    96     
-48    16     
160    224    
-48    -432   
-384   -416   
272    -304   
-64    144    
-48    -80    
80     240    
320    144    
16     -32    
-192   -240   
288    112    
64     160    
48     432    
-64    0      
144    -1056  
64     -320   
-96    -320   
192    -688   
-64    -16    
176    48     
240    -112   
-336   336    
208    -304   
-192   32     
112    32     
288    -1280  
-560   112    
528    96     
-624   32     
-160   -32    
-256   -64    
272    -80    
32     160    
128    -16    
-96    -80    
160    32     
160    304    
-144   16     
96     176    
-80    -192   
192    -224   
96     256    
-336   32     
80     0      
-496   -32    
240    -128   
-112   -192   
368    -64    
208    -96    
-112   -16    
176    -96    
-32    -1072  
240    0      
0      0      
16     -48    
96     -128   
-32    16     
128    -272   
192    -112   
208    0      
96     -32    
-176   64     
80     -64    
-16    -64    
144    -208   
80     -96    
64     -224   
96     0      
176    320    
-96    32     
64     -48    
-64    16     
64     -64    
112    64     
-128   -80    
-32    -32    
-240   -176   
160    -480   
128    -112   
-16    96     
224    -16    
-192   -176   
48     -80    
16     -624   
-32    48     
32     -80    
32     240    
144    176    
-128   256    
96     160    
-144   -80    
-32    160    
-272   32     
-240   -48    
80     -48    
96     128    
144    0      
-160   -160   
240    -352   
-336   0      
480    112    
-96    80     
-48    -144   
176    16     
80     80     
32     -48    
176    256    
-208   -48    
16     -32    
112    -64    
-576   -80    
16     -304   
80     80     
128    -304   
0      128    
176    208    
-32    -240   
16     -112   
160    -176   
-320   -64    
240    -32    
-240   80     
16     -16    
-160   -80    
80     -224   
-368   16     
128    -352   
-32    48     
112    -176   
0      224    
16     -816   
144    48     
-128   32     
0      -96    
-112   -48    
160    96     
-224   32     
32     -32    
-192   -96    
-48    -16    
160    160    
16     -96    
-48    160    
144    -208   
-32    64     
-240   176    
176    -32    
80     16     
80     48     
-512   -288   
464    -96    
64     176    
-272   -64    
96     48     
-80    -32    
-48    320    
192    -112   
-64    -16    
-992   -192   
16     160    
-192   144    
-368   64     
-48    80     
-320   32     
-384   16     
240    32     
-208   0      
144    -16    
-96    -320   
-256   -192   
48     160    
-544   -128   
80     112    
-368   -144   
-32    48     
-96    240    
-112   16     
-80    16     
-208   -128   
-80    -32    
-464   128    
-224   -32    
224    -32    
-96    32     
-256   -16    
144    208    
-400   96     
32     224    
-160   -80    
0      32     
112    144    
-384   -176   
-240   -560   
-304   -496   
272    240    
-336   96     
64     256    
-832   -176   
16     96     
-416   -656   
-80    -128   
176    -16    
32     80     
32     128    
48     0      
-320   64     
144    64     
-32    272    
-112   -32    
-160   80     
-128   32     
128    224    
-112   48     
80     96     
-64    -144   
-128   -224   
16     -304   
128    208    
16     96     
-192   64     
-352   -512   
16     -240   
192    112    
-96    0      
-112   -80    
-160   -16    
160    -48    
-176   -80    
272    64     
-224   -96    
48     144    
-176   -32    
-80    -16    
0      0      
176    112    
208    320    
-176   224    
96     320    
-32    -16    
112    -256   
-144   -240   
176    -64    
-208   80     
112    272    
-672   -464   
48     80     
16     -32    
-144   0      
64     96     
-192   96     
32     208    
-80    -32    
-64    224    
-16    -336   
64     400    
-48    -112   
64     96     
-192   -80    
80     64     
-560   -16    
96     128    
48     48     
-16    64     
0      -16    
-32    208    
-32    -32    
128    80     
160    208    
-96    -288   
-80    48     
-112   608    
0      -128   
-272   -384   
208    160    
-96    192    
-16    -48    
48     96     
48     560    
96     0      
-128   32     
32     -144   
-112   -176   
64     64     
-80    -32    
320    384    
-272   -48    
-80    -32    
112    96     
-32    496    
-80    -224   
-64    -64    
48     384    
-256   -80    
432    112    
-272   48     
64     48     
-32    48     
32     80     
-240   -96    
-48    48     
16     16     
0      48     
-112   32     
-16    0      
80     256    
-272   368    
-64    -224   
112    -432   
64     -16    
64     176    
-80    128    
32     96     
48     112    
32     -16    
32     32     
-224   -272   
144    -144   
-128   288    
-16    -272   
208    112    
16     160    
96     32     
160    176    
-80    112    
-64    -80    
16     -48    
-48    32     
112    112    
-64    64     
64     16     
-80    -208   
208    112    
-144   0      
80     -128   
192    -496   
-128   -400   
464    352    
-304   480    
272    320    
-608   -1152  
464    192    
-16    752    
48     64     
-64    -16    
96     128    
-208   0      
176    -64    
-160   -96    
48     208    
288    176    
-144   128    
48     -192   
32     64     
-16    0      
144    32     
160    368    
-144   -144   
-128   -96    
144    -160   
-208   16     
96     176    
16     144    
-16    -288   
-80    256    
192    -80    
-240   -288   
224    -464   
-304   -272   
192    -224   
128    336    
-16    352    
96     176    
16     112    
96     112    
224    128    
-176   48     
272    32     
-144   -112   
448    -976   
-128   256    
64     0      
-48    -32    
304    224    
48     192    
-224   128    
16     -48    
-128   32     
464    672    
-96    32     
-32    -224   
256    0      
64     -208   
-112   64     
-48    -496   
112    64     
144    224    
-320   -80    
-128   -416   
256    -576   
160    -208   
32     -48    
32     -144   
176    16     
-160   80     
96     96     
-208   -48    
80     -112   
-112   -48    
32     -368   
80     32     
144    32     
-16    48     
0      16     
96     112    
112    336    
-144   32     
64     -176   
96     -144   
-240   -368   
192    -160   
-16    -96    
-32    -192   
176    -112   
208    -672   
112    0      
-224   -896   
96     -16    
496    0      
-272   -16    
304    -544   
144    80     
-64    -80    
-144   -32    
0      64     
192    176    
-64    64     
32     -128   
-16    160    
-32    -432   
-48    48     
224    -16    
-32    96     
-48    128    
-64    -48    
224    48     
-80    160    
96     160    
-160   48     
48     48     
16     16     
-16    16     
64     -96    
112    0      
160    -48    
48     96     
240    -208   
192    80     
32     -464   
160    192    
-64    -512   
96     176    
160    16     
-48    144    
64     16     
-64    -48    
112    144    
-32    -208   
128    -16    
0      -64    
288    64     
0      -400   
112    48     
-16    -176   
48     64     
80     -16    
48     128    
176    288    
208    144    
-208   -16    
144    -176   
112    112    
-64    16     
112    112    
16     -288   
432    464    
-464   -176   
64     -224   
336    -880   
-144   224    
128    144    
-176   80     
160    -32    
-64    32     
112    176    
176    -176   
-96    64     
112    -48    
208    64     
112    -208   
96     160    
48     0      
16     -192   
-144   -384   
128    -1088  
128    48     
-64    -1104  
128    96     
-848   16     
-96    -512   
48     -80    
112    -1136  
-80    -192   
304    416    
-128   144    
48     224    
-32    48     
-208   -288   
272    -448   
96     -1088  
-80    64     
-16    -240   
16     32     
-192   16     
32     80     
80     -16    
-48    -352   
208    -48    
-32    -112   
-32    0      
128    -368   
-96    -112   
64     -272   
128    80     
16     -272   
-64    -16    
192    -160   
80     -256   
-224   0      
-80    -208   
-112   0      
32     -16    
64     -16    
32     -128   
-48    -128   
64     -176   
128    -128   
16     48     
-16    112    
-112   0      
176    96     
80     -16    
-32    -176   
-32    -176   
-48    -96    
-336   112    
256    -16    
16     -48    
-32    -352   
96     -160   
-112   -464   
16     -224   
48     -464   
-336   16     
144    -32    
-32    -224   
-272   -128   
272    272    
-112   96     
16     -16    
-80    16     
32     -64    
16     -128   
-32    -192   
256    -144   
160    -80    
160    128    
144    -1264  
64     -80    
240    -176   
48     -32    
32     -128   
144    -64    
-144   -16    
192    144    
-144   -80    
-176   -688   
-352   -176   
-304   -912   
-128   -352   
144    -432   
-80    0      
176    -144   
32     96     
0      16     
176    -48    
-80    -224   
-64    -224   
-80    144    
48     16     
-144   32     
-16    -48    
-16    256    
-272   -368   
112    -544   
80     -96    
80     96     
-304   -992   
256    -144   
192    -752   
48     -48    
-128   -128   
144    80     
-240   160    
0      -240   
-304   -16    
48     -32    
-176   96     
128    288    
64     -192   
32     -224   
272    48     
-144   -96    
368    416    
-784   272    
240    128    
-224   400    
-176   48     
-96    -304   
48     96     
-144   32     
16     -96    
-96    80     
-112   -32    
-272   -128   
-48    -80    
240    176    
112    160    
-32    144    
-384   -320   
80     -128   
-64    272    
64     -320   
-112   -16    
48     96     
-176   64     
160    -32    
-16    240    
0      -544   
288    368    
-1872  -176   
144    -32    
-736   -224   
-640   -368   
16     -96    
-448   0      
208    80     
144    -16    
-160   -64    
112    32     
-176   -48    
0      128    
-272   -432   
80     -432   
176    416    
16     48     
-32    176    
-144   128    
-272   80     
144    400    
-32    -160   
-256   -48    
272    304    
-320   192    
-624   224    
32     80     
-256   -272   
0      -416   
-240   176    
112    208    
-48    -288   
-32    -16    
112    -144   
-112   400    
256    -64    
-304   32     
-16    -304   
-176   -320   
96     640    
-176   208    
-112   -32    
-848   -32    
64     32     
80     -80    
-272   48     
112    -80    
80     80     
0      80     
-48    32     
-48    -48    
-16    48     
-16    96     
-240   64     
208    32     
-192   48     
-16    480    
-384   -64    
-160   -80    
176    592    
-112   384    
-160   -672   
128    -128   
-16    528    
-16    -128   
32     272    
-192   224    
176    -128   
-320   -400   
96     320    
-208   -96    
192    80     
-464   320    
128    112    
-304   -144   
48     48     
160    64     
-160   -144   
160    128    
16     112    
64     32     
0      48     
-32    128    
-160   48     
-48    -688   
288    160    
-48    208    
-304   -48    
0      -288   
-1104  -464   
64     -128   
32     432    
16     -128   
-96    0      
-32    176    
208    -16    
-272   80     
-192   -32    
208    448    
-16    400    
16     128    
112    128    
-176   144    
176    0      
-576   -480   
240    -384   
-32    -240   
240    16     
-96    32     
128    80     
-80    96     
144    128    
-64    80     
80     160    
48     80     
-368   -112   
192    -80    
-320   -96    
288    160    
-352   0      
16     48     
64     112    
112    160    
-80    144    
64     128    
-80    0      
32     32     
-128   -48    
16     128    
-32    16     
-368   -64    
144    96     
-192   32     
-16    -368   
-208   -176   
64     192    
-96    -256   
256    16     
-160   160    
192    80     
-96    16     
96     -16    
80     0      
32     112    
-96    -112   
192    160    
-80    0      
-176   -128   
384    256    
-128   128    
32     96     
112    224    
-32    64     
-192   16     
176    144    
32     -32    
160    -144   
352    144    
80     96     
240    288    
-256   256    
144    256    
-336   0      
176    240    
160    80     
-208   144    
80     224    
32     160    
64     96     
48     -112   
-64    -96    
48     -128   
176    -192   
96     -96    
160    -16    
-64    -128   
240    -48    
80     0      
16     16     
-16    96     
16     -48    
-16    48     
144    -96    
80     0      
176    176    
0      32     
96     32     
-64    80     
-48    -224   
16     240    
-16    48     
-96    80     
-96    -16    
-176   -32    
224    128    
-160   96     
-80    80     
-160   96     
64     64     
-96    128    
64     144    
-32    112    
-64    -32    
-80    -32    
-64    -80    
96     48     
-96    304    
48     -80    
-80    48     
208    112    
-240   64     
0      32     
176    96     
-80    -16    
0      64     
192    -16    
-208   64     
-16    -96    
-80    -48    
192    224    
224    48     
-112   80     
224    192    
-352   -1936  
256    16     
-64    64     
112    80     
144    128    
-48    64     
144    0      
-96    32     
48     64     
48     64     
48     32     
0      112    
-64    -320   
16     -416   
64     240    
144    112    
-48    0      
48     80     
64     32     
64     32     
112    16     
-64    80     
112    144    
-288   -80    
224    16     
32     80     
32     64     
0      -80    
-128   -32    
128    144    
80     -192   
-48    64     
208    -176   
32     80     
160    128    
-160   128    
224    96     
-64    208    
32     -256   
-64    240    
48     96     
64     96     
32     32     
48     16     
64     144    
-48    -496   
176    112    
48     -608   
-32    240    
-64    -160   
144    -112   
0      -224   
0      144    
-32    32     
0      272    
-240   -32    
192    -352   
96     -48    
80     -256   
-128   -192   
128    -464   
192    176    
240    -80    
-112   336    
208    -832   
-160   96     
16     -144   
-96    0      
128    80     
96     48     
-16    48     
48     -64    
-48    -128   
-16    -336   
80     480    
64     -144   
48     -16    
-16    -352   
48     -64    
16     -528   
176    512    
-16    -160   
-48    112    
-128   -256   
336    176    
-176   336    
272    -288   
0      960    
32     -384   
112    -336   
0      48     
192    -656   
192    320    
256    48     
-16    -160   
160    64     
96     48     
-128   -192   
288    256    
-192   128    
208    -176   
-16    -384   
256    848    
-192   -320   
208    0      
-48    -128   
32     -16    
80     -240   
-64    -192   
224    272    
-256   -16    
272    -112   
-256   352    
0      16     
64     384    
32     16     
48     16     
112    272    
-16    -96    
16     -80    
144    -272   
-192   352    
-48    -256   
-16    -208   
-160   -304   
-192   -2272  
64     16     
0      -1024  
112    592    
-1248  -512   
368    64     
32     224    
416    -176   
-384   -304   
-224   -1120  
128    -48    
16     416    
448    96     
-384   -720   
352    -80    
128    0      
128    192    
64     -592   
-176   -112   
-16    -32    
-144   -416   
112    -208   
-128   -400   
-320   -96    
192    -752   
144    240    
496    -544   
-496   32     
304    -640   
-144   304    
240    -32    
-112   80     
160    -32    
-80    -16    
-288   -208   
128    128    
-96    832    
144    -704   
208    80     
-64    -16    
-224   -880   
192    -640   
48     -96    
-112   32     
-48    48     
384    384    
-368   -128   
-32    -112   
-112   160    
48     -32    
32     48     
-656   -80    
256    16     
-288   -192   
368    96     
-96    -96    
160    -672   
-48    96     
96     80     
48     48     
64     -272   
112    96     
-368   -80    
400    -48    
-176   608    
480    464    
-1312  -1424  
576    -464   
-224   784    
176    -1040  
96     368    
-16    -64    
384    288    
-144   96     
48     -448   
-80    -160   
0      256    
352    208    
-352   112    
48     -128   
64     -416   
-720   -128   
32     -96    
-912   -576   
208    -16    
48     96     
96     -144   
-32    352    
80     -576   
0      0      
80     -208   
48     -288   
16     240    
320    16     
-128   -48    
48     -32    
-192   0      
144    48     
-80    32     
64     32     
64     -96    
416    -64    
-240   -240   
0      -256   
-96    -144   
448    -416   
-80    240    
-448   -864   
240    16     
-544   -32    
128    -16    
288    384    
-80    -240   
16     -48    
-16    48     
64     224    
-80    -368   
64     -128   
96     -112   
-16    64     
-48    0      
64     -64    
-80    -128   
112    -80    
48     -32    
-16    224    
32     96     
64     96     
-288   112    
64     -64    
-176   -64    
112    -48    
80     64     
-48    -400   
80     32     
128    -64    
-176   32     
144    80     
-128   48     
96     -48    
-16    -80    
-96    -144   
-16    -80    
32     64     
48     -64    
48     112    
-272   144    
272    144    
-688   -272   
-96    0      
-176   32     
-192   80     
-96    -160   
416    32     
-192   144    
208    48     
-32    -64    
-16    128    
208    112    
-224   -224   
208    -192   
-320   -240   
160    144    
-32    128    
-208   16     
0      32     
-64    16     
48     48     
32     64     
-160   80     
-1424  80     
96     128    
32     48     
-32    80     
16     16     
-176   48     
112    -80    
-48    48     
16     112    
192    48     
-80    -16    
64     192    
-112   16     
-256   176    
112    224    
-160   176    
48     48     
-848   -32    
80     192    
-144   -208   
-80    -112   
320    112    
-272   16     
256    320    
-304   160    
32     304    
176    1248   
272    720    
-64    272    
-64    208    
-400   -48    
224    128    
-656   -272   
256    -144   
192    -224   
304    -16    
256    -64    
32     96     
256    -128   
-16    -128   
32     0      
-32    48     
176    240    
-208   -160   
-64    -128   
-352   -128   
0      -16    
-544   96     
176    48     
48     -48    
48     16     
-16    -192   
-112   -48    
0      96     
256    144    
-144   0      
-576   0      
128    -16    
-96    16     
128    112    
-288   16     
96     144    
32     0      
-128   112    
-672   -16    
32     0      
112    16     
16     128    
0      96     
48     48     
-64    64     
96     96     
48     48     
-112   0      
48     96     
96     48     
64     64     
-224   -32    
128    64     
-608   -96    
-64    -96    
208    -48    
0      32     
32     96     
288    336    
-496   192    
16     -128   
-96    128    
112    16     
-16    96     
-320   -144   
128    16     
-528   -224   
112    48     
-112   -32    
144    144    
-16    144    
-112   96     
-16    80     
-80    48     
48     96     
112    128    
144    112    
-176   -16    
-32    0      
0      0      
64     96     
-48    48     
16     48     
32     64     
48     48     
-16    32     
96     208    
-80    64     
-16    0      
192    192    
-208   48     
176    176    
-272   80     
64     48     
-240   112    
-64    112    
288    224    
-288   144    
224    112    
-64    64     
-64    0      
48     80     
160    384    
-16    144    
-144   16     
48     160    
80     160    
128    368    
48     544    
-224   192    
112    -32    
-192   -80    
-48    -96    
-48    0      
48     224    
112    208    
-64    80     
96     80     
-160   -64    
-48    -208   
96     208    
-48    16     
0      32     
96     -16    
-32    112    
48     144    
-208   -288   
160    208    
-112   -16    
16     -128   
304    576    
-176   -80    
288    112    
16     800    
272    16     
0      352    
224    16     
0      -464   
80     48     
48     208    
32     -48    
96     128    
48     208    
-16    32     
32     0      
-112   48     
-64    48     
0      -16    
0      -144   
-48    240    
176    112    
-80    80     
-32    -64    
0      96     
-96    -16    
16     112    
-32    -176   
-80    -272   
272    528    
-16    160    
48     80     
32     80     
-80    -48    
80     32     
-80    -112   
-128   96     
64     -272   
-80    256    
304    224    
-64    -192   
80     -176   
48     64     
64     48     
704    448    
-448   336    
192    176    
-336   -96    
-16    -64    
624    160    
-368   352    
-128   -112   
272    32     
-112   416    
16     0      
-320   48     
208    -464   
-128   176    
256    -688   
32     80     
288    224    
32     304    
288    -192   
-32    32     
96     16     
320    368    
48     -48    
160    -160   
-16    112    
-192   -176   
192    -384   
-320   -256   
48     16     
96     32     
64     384    
32     -144   
-256   -272   
96     -400   
48     432    
-144   64     
240    432    
144    144    
-368   -384   
-16    -256   
48     32     
112    416    
-112   -384   
192    64     
48     -16    
80     256    
-192   -224   
256    16     
224    0      
80     -48    
80     144    
-32    160    
-336   -512   
256    48     
192    352    
288    1136   
-320   128    
304    -480   
160    352    
-16    -352   
16     -32    
96     -752   
160    -144   
128    -240   
-128   416    
128    -1744  
256    480    
144    624    
-48    -224   
112    -160   
80     128    
64     240    
0      -208   
-96    -272   
448    -128   
-64    352    
48     176    
64     -128   
-64    -1088  
240    560    
-96    416    
208    -176   
80     -336   
80     64     
64     320    
48     -144   
80     112    
144    -208   
-16    0      
128    -192   
-208   -64    
64     -368   
0      64     
16     -416   
-48    -192   
-16    -384   
0      16     
16     304    
208    160    
-32    -48    
-64    -288   
-64    -32    
80     208    
128    272    
-48    -176   
0      256    
32     -512   
48     112    
32     -272   
-64    144    
32     240    
112    -1328  
-96    208    
96     -288   
-96    -960   
176    -96    
32     -384   
240    -48    
-160   -160   
32     -272   
208    144    
-32    -16    
-96    -208   
144    -32    
144    -592   
-112   224    
-32    -240   
-112   -128   
-544   224    
96     -16    
96     16     
-48    -128   
176    48     
-224   -512   
96     -32    
208    96     
-48    48     
-16    96     
0      16     
144    -288   
-336   224    
176    64     
0      -160   
-16    -16    
48     -112   
-112   -176   
80     -128   
176    -64    
0      -16    
96     -64    
-64    96     
-144   -256   
96     -528   
48     -16    
192    112    
-64    16     
48     -32    
96     80     
192    -16    
-64    -112   
-176   -144   
144    32     
-48    320    
-16    -16    
-16    -96    
192    -256   
-48    16     
160    -64    
-16    -16    
144    0      
64     96     
208    96     
-192   -32    
0      -16    
64     -80    
-352   16     
48     -64    
32     -16    
112    -448   
352    64     
-112   -176   
-96    80     
64     48     
144    -80    
96     -112   
-32    -80    
-48    -128   
80     -80    
112    96     
-32    304    
-160   -64    
96     -256   
416    -128   
-192   -320   
0      -48    
-112   -176   
272    256    
-176   -1408  
80     16     
224    -16    
32     -32    
48     -80    
0      -80    
192    208    
-96    -48    
-480   -16    
64     64     
-1056  48     
16     -16    
0      -64    
352    -144   
-240   -64    
192    -176   
0      224    
176    16     
-208   32     
48     80     
-96    -112   
16     -96    
-32    -64    
0      128    
304    256    
-272   160    
16     32     
272    448    
208    -48    
0      16     
-48    -304   
208    64     
-400   0      
-16    32     
64     -176   
32     -256   
-448   -208   
-16    16     
48     112    
128    32     
-144   -80    
224    -128   
-48    -64    
112    -352   
16     128    
192    -176   
0      48     
-176   128    
176    -48    
-176   -32    
48     32     
-48    -32    
-112   144    
-96    -80    
-64    -112   
-64    -112   
128    -208   
-208   112    
128    -48    
-48    96     
-160   32     
-1312  -48    
-80    -32    
208    -80    
16     48     
80     32     
-48    48     
-128   -96    
240    16     
-80    -32    
32     32     
-480   -80    
144    -80    
-160   32     
-64    64     
-272   -80    
-720   -96    
0      0      
-160   32     
-144   -16    
-480   -80    
-208   -48    
144    16     
-208   0      
80     64     
-208   -192   
-96    -112   
16     96     
-224   -144   
0      80     
16     16     
-16    -176   
0      -16    
-128   -32    
-96    32     
-256   48     
-128   0      
-1072  32     
144    112    
80     64     
-96    256    
-272   -64    
224    64     
-288   -192   
80     0      
-48    96     
0      32     
0      144    
-112   -32    
0      128    
-16    48     
32     176    
-432   144    
160    96     
-816   112    
-384   -688   
176    -144   
192    1136   
-256   -432   
128    -304   
-16    400    
-48    -160   
-80    48     
-64    -16    
-64    48     
-16    48     
0      96     
-320   -48    
-64    32     
-672   -112   
48     96     
-256   -752   
208    -176   
0      256    
-208   -304   
32     672    
-96    -336   
-32    176    
-144   112    
80     -64    
-96    144    
-32    -96    
32     192    
-144   -128   
-64    48     
-352   -64    
352    -528   
-96    624    
160    240    
-128   -208   
-48    -48    
128    176    
-16    144    
32     64     
-192   -144   
-48    -176   
144    368    
-256   0      
32     -48    
-320   -128   
-32    48     
-1728  -240   
128    48     
16     480    
-112   240    
-64    384    
144    384    
-192   0      
-304   -352   
128    -208   
-160   16     
0      48     
-160   -16    
128    64     
-224   -96    
16     96     
-576   -32    
-64    64     
64     64     
-80    48     
80     48     
-80    48     
32     80     
112    112    
96     432    
-32    304    
272    128    
-96    256    
144    96     
-112   -80    
80     -48    
16     -64    
-208   -320   
-224   -496   
336    -240   
-112   112    
16     224    
208    240    
-80    240    
48     240    
48     48     
208    112    
-160   -160   
-160   -128   
16     -160   
144    400    
352    272    
-48    160    
368    304    
-80    192    
-144   64     
416    -256   
-16    128    
-272   -192   
128    -512   
96     560    
32     48     
-272   -64    
256    208    
-192   -48    
128    -256   
112    48     
32     160    
128    608    
272    272    
-464   -240   
176    -256   
-208   224    
-16    -96    
-32    0      
112    176    
-16    480    
0      -416   
-96    -480   
400    272    
-224   -96    
-32    -368   
144    224    
48     256    
-64    -16    
144    304    
-176   16     
-48    768    
-32    256    
-16    128    
32     224    
-48    736    
224    624    
-208   192    
-400   96     
96     336    
-144   128    
176    592    
512    496    
-208   32     
288    -96    
-16    -128   
176    -32    
-320   -112   
288    80     
96     224    
-224   288    
-224   -16    
48     16     
-144   -32    
-160   256    
112    176    
-96    112    
96     32     
16     144    
-48    32     
-160   16     
400    160    
48     112    
-32    -48    
-160   -128   
224    -160   
-64    48     
144    0      
-48    -96    
128    64     
240    144    
-32    80     
240    288    
208    320    
-288   112    
128    48     
64     48     
48     128    
-64    -112   
-176   -32    
128    -144   
-208   -112   
64     -528   
160    -192   
0      128    
272    96     
-192   0      
160    96     
0      64     
80     112    
160    240    
-128   144    
-192   -80    
32     -64    
48     -96    
192    96     
-80    -16    
176    -320   
-16    80     
112    -320   
-16    -16    
-32    64     
64     48     
-32    -64    
48     -160   
-96    176    
288    128    
-32    -16    
80     112    
0      16     
-176   -144   
192    0      
48     -16    
-48    480    
80     -288   
64     160    
224    112    
80     48     
-112   64     
80     32     
-32    16     
-32    32     
48     80     
32     144    
-144   0      
0      -208   
160    240    
-32    48     
16     272    
96     -208   
16     48     
112    -1328  
32     -32    
-48    -224   
128    48     
96     48     
-16    80     
-16    64     
144    112    
112    64     
-128   80     
128    128    
-160   48     
176    64     
16     -352   
16     16     
0      -320   
-16    64     
128    176    
-16    112    
176    176    
-224   80     
-64    48     
128    16     
-80    96     
288    80     
-80    64     
-16    -208   
96     32     
48     -64    
48     -32    
80     -64    
-336   -208   
208    -304   
112    48     
-64    48     
128    80     
-128   0      
112    32     
-80    96     
256    64     
-64    176    
0      -128   
64     32     
16     -160   
32     128    
0      -96    
-64    16     
-32    -304   
96     160    
0      176    
16     80     
112    -32    
208    -48    
48     48     
80     -224   
-16    96     
48     -160   
16     160    
176    -32    
-48    -16    
64     -288   
-48    80     
0      16     
-32    112    
96     80     
-32    -176   
64     64     
-80    -416   
-128   -2240  
224    64     
-80    -1312  
16     -48    
64     304    
288    -128   
-64    144    
160    -32    
0      -816   
32     0      
176    -112   
96     80     
-176   -368   
400    -192   
-2016  96     
96     -64    
16     -48    
96     -576   
208    -32    
-208   -176   
32     -208   
256    160    
-160   -192   
192    -224   
-128   192    
144    -384   
-96    160    
96     0      
-32    -64    
-128   -48    
64     0      
224    128    
-224   -144   
96     -80    
176    160    
48     48     
112    240    
32     -80    
112    -128   
16     48     
80     -224   
112    64     
-16    32     
112    -192   
-336   48     
112    -144   
-256   -96    
32     -176   
192    48     
-160   -16    
128    -80    
-128   -800   
256    -208   
64     -112   
48     128    
240    368    
-480   32     
-80    32     
0      -144   
448    -16    
-64    32     
-304   -48    
240    96     
-16    0      
80     -320   
0      -128   
48     -592   
32     -112   
-48    -304   
-64    -96    
-48    -48    
32     240    
-144   -64    
160    32     
-192   -16    
48     -112   
-208   -112   
208    -16    
-480   -144   
80     -112   
-80    -176   
176    -160   
-176   -16    
128    -416   
-192   -480   
80     16     
-16    160    
-208   -80    
-32    -160   
-144   64     
32     -64    
48     160    
304    -432   
-560   320    
160    -208   
-80    48     
160    -96    
-32    48     
128    -272   
-48    128    
-176   -336   
432    80     
-288   -240   
288    672    
-512   64     
16     -352   
-592   -112   
560    64     
-544   0      
48     -48    
96     32     
0      -176   
16     80     
144    -64    
0      32     
64     48     
32     32     
-192   32     
-48    -112   
48     112    
-32    96     
-80    64     
-112   208    
0      16     
112    -48    
-32    80     
-16    -144   
-192   -144   
352    -528   
-48    32     
32     80     
288    48     
-96    -64    
192    -16    
-64    128    
176    -48    
-144   96     
80     -80    
-64    -32    
80     -48    
0      112    
64     112    
80     128    
-144   -144   
-416   128    
-192   0      
-1648  -112   
-48    16     
-384   -240   
176    -208   
48     176    
32     528    
0      480    
-192   112    
-608   80     
464    608    
-672   0      
176    -32    
-32    -16    
-16    16     
0      -32    
80     32     
-224   -96    
32     112    
-48    96     
48     -96    
-208   32     
-208   16     
64     80     
32     -16    
-48    -96    
-304   -704   
16     -272   
0      160    
-48    -16    
-80    80     
96     112    
-144   48     
-224   -192   
48     16     
-1296  -16    
-176   -16    
448    656    
-208   496    
-48    -608   
128    -160   
32     -80    
-48    816    
192    288    
-320   -464   
0      -240   
-368   576    
128    16     
-112   -336   
48     80     
-336   -32    
48     32     
-352   -32    
256    288    
-160   -320   
-32    -144   
112    16     
32     32     
256    1312   
80     80     
-144   -352   
-32    64     
96     32     
-48    -336   
16     -16    
160    560    
320    432    
-576   240    
240    80     
-80    16     
0      -64    
-48    16     
64     48     
-64    16     
-128   -16    
96     64     
-96    480    
240    256    
-128   224    
-32    96     
-288   -80    
192    144    
-944   0      
336    320    
-320   -32    
80     16     
16     48     
-304   -208   
176    -128   
-16    112    
128    16     
176    192    
-288   192    
-80    -64    
-48    112    
-48    -80    
176    -32    
-288   -272   
256    112    
-1552  -80    
-112   16     
64     -32    
-64    0      
208    96     
160    208    
0      96     
416    416    
-448   272    
16     48     
-256   144    
160    16     
-96    96     
-224   -128   
64     80     
-736   0      
-112   64     
48     160    
32     80     
-48    80     
-48    32     
-160   0      
0      32     
80     160    
-288   32     
192    32     
16     144    
-208   -64    
48     -144   
96     192    
64     16     
48     48     
256    208    
-224   80     
-48    -448   
-16    -176   
112    192    
-48    192    
-176   32     
-16    16     
48     80     
-80    16     
-208   16     
-64    0      
80     80     
-144   112    
160    64     
0      112    
0      64     
96     64     
0      112    
0      32     
16     80     
80     48     
-192   -48    
160    -16    
-128   -96    
16     -64    
240    176    
-48    96     
48     -32    
32     -16    
112    128    
16     128    
32     160    
-288   0      
432    32     
-144   -48    
64     0      
-80    -16    
48     128    
0      80     
-16    -128   
-96    -64    
128    64     
-112   128    
160    64     
0      32     
352    240    
-256   112    
-96    16     
96     -16    
-112   -48    
144    64     
-160   -48    
128    16     
-48    -176   
64     -160   
48     144    
128    0      
16     112    
96     -16    
32     144    
336    192    
-240   224    
-16    32     
112    208    
48     -64    
80     48     
0      32     
224    80     
-144   16     
96     160    
32     -32    
544    416    
-368   32     
0      96     
448    80     
-16    112    
-32    80     
96     0      
32     48     
80     0      
-16    192    
-64    -32    
-48    80     
160    128    
16     -816   
16     192    
272    128    
-176   -112   
224    0      
-48    48     
80     128    
112    80     
-80    112    
160    0      
96     112    
-128   144    
48     -160   
-128   112    
176    96     
-192   48     
96     -80    
112    224    
-16    -64    
384    -32    
-64    112    
176    176    
48     32     
64     96     
64     80     
-144   -64    
96     64     
-48    -32    
96     128    
-176   -48    
288    -128   
-144   128    
144    -384   
-80    144    
192    96     
96     96     
-160   176    
32     32     
48     64     
32     144    
-16    16     
16     80     
96     64     
-32    48     
0      48     
-48    -320   
80     48     
0      -224   
160    -16    
-320   -208   
304    -592   
-80    -256   
256    288    
-160   -64    
-32    -48    
240    0      
192    256    
112    192    
-208   -112   
192    32     
-64    -64    
240    144    
-336   -800   
48     -240   
336    -1200  
16     192    
-224   -48    
144    32     
48     16     
-128   -144   
192    64     
96     144    
32     112    
-80    -32    
32     -80    
144    0      
256    144    
-192   -80    
48     -16    
448    320    
-336   464    
-80    0      
48     96     
64     16     
80     80     
-96    160    
224    288    
-48    176    
144    96     
-160   160    
432    192    
-288   96     
-80    -352   
16     0      
80     32     
-96    80     
64     -288   
176    80     
224    48     
80     96     
48     0      
64     16     
192    192    
16     -256   
0      0      
-80    -336   
208    336    
-224   -832   
-272   -768   
448    384    
-192   176    
144    -32    
-32    128    
-48    -48    
128    320    
-144   -128   
192    272    
-16    368    
112    -80    
-32    -176   
224    144    
16     192    
-144   -368   
96     224    
-144   -304   
112    -720   
112    352    
192    -224   
160    -288   
-80    64     
112    -608   
-48    -192   
144    -480   
-32    -112   
128    -480   
64     -48    
160    64     
176    32     
-192   224    
-96    -240   
160    -368   
16     0      
-144   0      
144    -32    
-208   -368   
224    -336   
-752   -96    
160    -144   
0      48     
80     -192   
128    -80    
-16    -1312  
32     -160   
80     96     
-80    -96    
112    -528   
96     96     
48     -448   
192    -128   
80     -176   
176    -48    
-16    256    
-48    0      
64     -96    
-112   -560   
96     -288   
16     -176   
0      -16    
48     -624   
96     208    
32     -80    
-368   -32    
80     -176   
176    112    
-160   -16    
64     -32    
-320   -80    
16     144    
32     -32    
-128   -80    
96     0      
-48    -304   
192    -16    
-96    -2032  
-16    -64    
-64    -48    
32     256    
80     -128   
-64    576    
112    576    
112    192    
-48    544    
32     80     
-896   -144   
-48    64     
160    -80    
64     -128   
320    176    
-144   -208   
-96    48     
64     -192   
0      32     
112    -112   
112    -16    
48     -16    
16     -64    
272    512    
-16    544    
-496   -336   
80     -736   
208    1056   
-96    16     
16     -544   
176    528    
-128   -464   
224    96     
192    832    
64     320    
-64    -432   
-128   -96    
-32    32     
32     -112   
32     32     
-144   -48    
32     -176   
-1072  -64    
64     -32    
96     576    
0      -496   
160    96     
240    112    
32     416    
16     416    
32     96     
144    32     
-16    -208   
-224   -336   
16     -256   
-368   -480   
336    -592   
-64    0      
320    256    
-176   208    
128    -48    
64     96     
96     -144   
-144   -320   
-272   -112   
496    -320   
-320   -128   
352    -16    
-144   32     
240    32     
-288   48     
128    112    
-48    -16    
-176   -384   
640    176    
-224   -80    
368    -16    
-64    -160   
288    0      
-32    -16    
176    -64    
-272   -176   
560    32     
-608   -64    
448    -144   
-256   64     
384    -16    
-416   -32    
80     -80    
48     192    
-672   -128   
-224   -64    
80     -160   
-160   48     
192    -112   
-960   96     
224    64     
-336   80     
64     0      
128    48     
-64    16     
-176   -144   
0      -80    
-224   48     
64     64     
-144   96     
368    80     
-160   32     
-112   64     
-176   -160   
-64    0      
-16    192    
-320   64     
-160   64     
-80    -16    
16     16     
48     0      
48     32     
-144   -48    
176    112    
-112   -144   
-96    -48    
-176   -96    
-176   -80    
16     0      
-208   0      
-128   0      
-288   32     
0      32     
-1136  -48    
224    208    
-224   16     
128    128    
-32    -128   
160    160    
-160   -304   
192    64     
-16    48     
128    96     
-32    64     
0      112    
-16    -64    
-192   -48    
-80    80     
64     16     
128    192    
-992   -96    
272    160    
-160   -64    
128    80     
-16    80     
64     64     
-32    -32    
0      208    
-128   32     
-144   112    
-16    64     
32     80     
-128   48     
-144   16     
-32    48     
-704   -48    
-80    -32    
96     -304   
0      80     
160    160    
-224   32     
-32    0      
-16    48     
-160   -128   
-224   -64    
496    160    
-240   64     
0      -96    
-64    -16    
-32    64     
-688   -48    
16     -80    
32     -32    
-32    -128   
-16    0      
112    80     
-128   -80    
48     -64    
32     -16    
48     64     
-48    96     
-32    0      
-160   16     
-144   -112   
-96    -80    
-80    64     
160    -64    
-384   -32    
-32    0      
112    64     
-16    32     
-16    64     
48     48     
112    112    
-240   -64    
-16    0      
-64    112    
128    432    
-144   64     
0      96     
-64    0      
16     64     
240    160    
-288   32     
160    80     
-80    64     
-16    48     
-48    -80    
0      64     
-16    -48    
-144   48     
208    48     
144    176    
-336   16     
80     64     
-368   -160   
80     80     
176    -32    
-96    0      
112    128    
48     48     
-112   144    
176    48     
-208   -112   
176    48     
48     16     
-80    -192   
0      -48    
64     0      
192    160    
-192   32     
-32    32     
112    32     
48     48     
-48    -64    
256    96     
-96    16     
160    96     
-144   -144   
208    64     
208    320    
144    -192   
-80    224    
-32    320    
192    304    
-32    48     
-16    -224   
-48    -192   
144    160    
0      112    
-32    112    
-48    16     
48     128    
176    224    
-160   48     
-64    -32    
-32    0      
-176   -528   
96     176    
80     208    
48     -128   
48     32     
176    288    
144    256    
-80    64     
112    240    
128    -112   
-48    48     
-144   -400   
176    -64    
32     -112   
144    -48    
224    256    
-96    128    
96     352    
272    -304   
-16    -48    
64     16     
48     96     
32     48     
-80    48     
48     240    
240    208    
-112   128    
80     160    
-32    128    
48     -176   
-48    128    
48     80     
-144   160    
240    96     
-160   -192   
192    128    
-48    464    
-16    -624   
256    -336   
-32    592    
16     160    
-240   -512   
192    192    
-208   176    
-80    -96    
16     64     
-208   -64    
0      32     
320    -96    
-128   80     
-48    320    
-32    -192   
208    80     
-48    192    
-48    -320   
224    -128   
16     272    
112    -16    
256    160    
-288   32     
48     128    
160    80     
-96    -64    
80     48     
48     -32    
96     224    
-272   -160   
-16    160    
-224   -48    
288    -384   
176    480    
-112   32     
-16    384    
48     384    
-16    -176   
496    544    
-576   96     
48     -896   
16     -432   
-192   -1008  
80     -112   
160    -128   
0      -16    
192    64     
-32    464    
16     -96    
128    272    
-80    304    
288    400    
-32    512    
0      32     
16     80     
0      -48    
272    96     
-320   -320   
368    144    
-64    144    
48     64     
0      -16    
96     96     
16     32     
80     96     
16     16     
96     128    
192    160    
-144   -80    
-64    80     
144    272    
-80    -112   
80     -128   
128    400    
48     -48    
64     128    
112    -96    
-144   -240   
-192   -736   
112    -288   
240    -32    
-384   80     
256    -112   
-96    -64    
256    144    
-32    48     
32     32     
32     -80    
64     192    
0      -128   
176    224    
-48    -112   
-144   64     
240    384    
-48    112    
-128   -432   
80     208    
96     -80    
80     128    
352    512    
80     800    
-128   656    
0      -1376  
304    -96    
-16    224    
-32    64     
32     -112   
64     144    
240    320    
-144   208    
64     -64    
-176   -256   
336    -80    
-16    -96    
-48    80     
0      -272   
0      32     
64     -32    
16     176    
160    -64    
-64    -64    
32     -144   
0      224    
128    -416   
144    -400   
-48    -48    
-80    -608   
160    -1120  
96     -304   
16     80     
256    48     
320    208    
-16    -48    
96     112    
128    -192   
-16    48     
16     64     
-80    -464   
80     48     
-80    -272   
-32    -208   
480    144    
-240   -304   
224    -352   
64     32     
256    48     
-144   -160   
80     -112   
32     192    
64     0      
-80    -368   
192    -96    
208    32     
-176   144    
48     -448   
-80    -496   
-176   112    
48     -304   
-64    16     
64     -352   
112    -32    
-32    -1792  
112    -336   
-48    64     
192    32     
16     64     
112    160    
-48    -128   
-160   -96    
-304   -192   
16     -144   
-224   160    
64     160    
48     80     
-48    -48    
80     -96    
-64    -128   
48     -192   
-128   16     
144    -352   
0      -288   
-320   -80    
32     -144   
0      48     
-16    -80    
0      16     
-192   -48    
16     -176   
368    -96    
-112   80     
400    96     
64     288    
-304   352    
16     -256   
304    240    
16     16     
112    96     
208    -96    
-96    -112   
48     -96    
128    -128   
-112   48     
-16    -112   
128    -32    
-64    -80    
160    -96    
-96    -208   
-64    -272   
-208   -656   
112    0      
32     64     
-128   32     
-16    32     
-128   -96    
144    -32    
-32    48     
-96    -16    
128    -96    
64     -16    
320    48     
144    192    
-304   -208   
80     -192   
16     -176   
256    128    
-112   -464   
112    64     
32     -48    
-32    -128   
-16    0      
32     128    
-96    80     
0      32     
-400   32     
32     -48    
-688   48     
96     -96    
-16    -128   
320    -128   
-272   96     
128    -1152  
16     64     
32     80     
192    -48    
-384   96     
144    32     
-192   -32    
128    16     
-80    -48    
-48    -96    
96     288    
128    -208   
-112   -80    
160    -80    
176    192    
-80    -384   
-16    48     
-48    -16    
80     96     
96     144    
-336   -32    
-144   -144   
-32    -240   
-112   16     
0      0      
176    272    
-288   0      
96     144    
208    -240   
-160   128    
192    -144   
96     112    
-96    -32    
160    32     
0      -16    
16     32     
-96    64     
48     128    
-48    32     
32     64     
-208   -32    
-128   -256   
64     80     
-192   -32    
-32    160    
0      96     
-144   0      
32     -32    
-672   -16    
-80    -80    
-96    -32    
64     80     
80     -32    
-48    48     
-144   -112   
96     96     
96     -96    
-64    176    
64     48     
-192   144    
-176   -48    
-112   16     
-96    16     
-176   32     
-16    16     
-160   128    
-112   240    
208    304    
-496   -32    
160    -96    
-16    112    
-64    -112   
112    16     
-112   -416   
-80    -336   
256    48     
-160   224    
304    320    
-208   288    
48     48     
-224   16     
-64    -96    
-176   -48    
16     -16    
16     64     
-48    288    
96     128    
-176   -80    
272    240    
-384   224    
0      -176   
-112   208    
48     64     
-80    -16    
-48    64     
-208   -96    
64     48     
-432   -16    
0      80     
-48    48     
80     32     
0      464    
112    -512   
-208   -80    
224    544    
-288   -544   
-112   16     
-96    112    
-32    256    
-16    160    
-224   -16    
48     -32    
-128   80     
-48    64     
-864   -224   
240    192    
-32    208    
-96    144    
-48    -32    
-112   96     
64     -160   
-80    -16    
0      16     
48     -96    
-128   -224   
448    -176   
-16    304    
144    176    
80     -480   
-208   -176   
160    336    
16     96     
144    64     
-144   128    
-32    0      
32     128    
112    224    
64     64     
-128   192    
144    0      
-32    272    
-32    96     
-272   -176   
32     272    
-272   96     
-32    576    
352    -464   
-160   208    
80     -144   
-416   -128   
96     592    
-208   -208   
-64    -32    
-128   112    
-128   16     
-112   -16    
-224   160    
-352   -112   
192    784    
-464   -32    
16     -800   
240    576    
-416   96     
80     -320   
-224   96     
736    480    
-432   832    
-112   -768   
304    32     
-160   704    
32     -256   
-272   -256   
400    416    
-240   -32    
-64    0      
80     128    
16     256    
-16    80     
384    160    
-544   -80    
256    176    
-96    48     
-96    16     
48     -96    
-32    32     
32     -32    
0      240    
48     208    
80     304    
-208   -464   
192    176    
-16    288    
-16    -16    
64     112    
0      400    
192    320    
-416   -464   
176    144    
-16    480    
-128   416    
32     -752   
-64    240    
-144   -16    
-48    -112   
176    512    
-48    -304   
-48    -432   
224    448    
48     992    
48     784    
-128   -128   
144    -784   
-160   -448   
480    0      
-432   144    
272    48     
-112   176    
160    16     
-112   64     
160    112    
-48    -32    
80     144    
-32    64     
96     64     
-112   0      
384    128    
-368   224    
256    272    
-80    -192   
160    0      
0      144    
0      288    
-48    0      
176    -96    
-208   -112   
128    -224   
-112   272    
96     64     
144    96     
48     240    
112    0      
-64    -48    
48     80     
96     -64    
-48    0      
80     192    
144    320    
144    48     
-112   -368   
16     80     
-32    -128   
96     -144   
-96    -208   
32     -240   
224    448    
256    736    
-304   -128   
96     480    
64     64     
0      144    
-32    -272   
-16    -64    
96     80     
-32    -48    
48     368    
-64    160    
-80    160    
80     80     
256    336    
160    160    
32     192    
-16    256    
0      192    
48     128    
-48    160    
-176   0      
224    48     
-112   96     
64     -48    
16     176    
-160   16     
0      80     
-112   -32    
112    64     
-48    64     
-16    96     
-48    80     
32     160    
128    -64    
16     -96    
32     48     
64     32     
0      16     
96     -336   
64     32     
16     -912   
-112   80     
16     96     
-64    -80    
-80    160    
112    -16    
-96    64     
176    128    
-48    -80    
-96    -128   
272    0      
0      -16    
208    128    
-176   -224   
176    48     
-48    -320   
112    64     
48     -352   
16     64     
0      224    
16     32     
224    288    
-208   112    
16     64     
-48    -144   
-208   -80    
352    -192   
-64    192    
176    64     
-112   192    
160    -336   
-80    32     
80     -976   
144    176    
-80    -176   
-256   0      
32     112    
128    144    
144    96     
96     272    
272    96     
160    -352   
160    80     
224    -64    
96     176    
-128   -928   
208    48     
0      -256   
192    144    
-112   -64    
320    320    
224    208    
-368   -80    
-16    -96    
192    -16    
64     240    
-80    -240   
16     64     
96     -256   
48     -32    
96     -208   
144    112    
-64    -64    
64     64     
32     48     
16     160    
32     96     
240    80     
-192   -64    
336    -112   
128    272    
64     -160   
0      -80    
336    -256   
-144   192    
272    -112   
-96    16     
160    -96    
112    160    
-112   -384   
96     48     
-48    -32    
432    64     
-48    -656   
160    -112   
16     -224   
112    -240   
-80    -192   
-96    -272   
144    -160   
32     -16    
272    160    
-32    -144   
160    -208   
-32    0      
160    -848   
144    32     
-80    -80    
32     -688   
-16    -224   
96     -16    
64     0      
-160   -1680  
288    96     
0      -128   
160    -96    
-48    80     
-16    -64    
224    -160   
16     160    
0      48     
16     48     
-720   -160   
64     -128   
256    -48    
80     -64    
128    -80    
112    64     
96     0      
-48    -1104  
-160   -144   
368    352    
16     80     
-32    -32    
-160   -32    
48     -128   
160    128    
-400   -176   
304    176    
-688   112    
48     80     
80     -16    
176    64     
64     64     
-32    -96    
64     64     
80     -16    
112    0      
48     -400   
-32    -80    
224    -48    
112    0      
-64    80     
272    112    
-208   208    
-32    160    
32     224    
48     32     
224    224    
-112   80     
64     -80    
64     -352   
-32    -32    
-32    -80    
96     160    
64     -32    
-16    -48    
-32    96     
48     16     
-496   -240   
-112   -320   
-384   -128   
64     128    
160    560    
-32    160    
-304   -240   
-48    -1136  
64     -80    
64     144    
-32    384    
32     -112   
48     -272   
-176   80     
144    400    
-160   -208   
-128   32     
80     -144   
48     -64    
-400   32     
128    -224   
-256   -288   
384    32     
-80    -336   
112    224    
16     208    
0      -16    
-16    16     
-96    -80    
-48    -96    
-80    32     
16     -496   
-240   384    
208    -176   
-832   -48    
-32    -368   
-16    -32    
96     -272   
224    144    
128    16     
160    448    
-112   112    
96     352    
-160   -304   
48     -336   
-224   128    
-48    -256   
-400   -144   
640    240    
-800   -576   
304    -48    
16     304    
128    -176   
16     32     
80     -480   
32     -176   
0      -128   
64     64     
112    224    
96     272    
-240   64     
-16    32     
352    -32    
-272   304    
-784   -224   
336    -176   
-48    336    
320    -272   
80     416    
-64    -144   
-384   464    
-368   -16    
-784   -496   
48     368    
-64    -208   
-208   -240   
192    80     
-48    176    
272    -64    
-480   144    
-592   -16    
-96    96     
-640   -1056  
144    528    
32     -160   
-160   192    
-144   -112   
-976   -64    
-128   -112   
80     -80    
-112   64     
64     192    
240    -208   
-192   128    
-16    -64    
-224   -128   
-48    240    
-160   -1184  
688    32     
-16    1152   
80     160    
32     -208   
112    -224   
-80    -352   
-240   544    
-80    -240   
-112   -304   
-272   144    
0      -416   
-144   256    
304    -576   
-176   560    
192    -672   
-96    880    
48     -256   
-192   128    
176    144    
0      864    
-112   -96    
-336   -704   
64     32     
-752   432    
96     256    
0      -32    
208    176    
-48    -16    
96     64     
-240   160    
-64    -384   
-80    512    
96     -304   
0      320    
-48    16     
32     -208   
-304   -144   
-64    48     
-368   -96    
336    -320   
0      0      
-176   -144   
384    160    
-192   96     
224    -128   
-16    128    
128    0      
-80    64     
80     80     
-128   -32    
224    720    
-96    -592   
-48    -288   
80     576    
128    80     
-592   -128   
48     128    
-96    -288   
48     128    
16     -64    
-80    -16    
128    64     
32     16     
-80    32     
0      32     
16     64     
-32    80     
64     64     
-192   -128   
-32    224    
-640   128    
-96    128    
96     112    
-48    -32    
16     -128   
-240   -128   
176    32     
-208   -112   
144    304    
-64    208    
-96    240    
-160   64     
16     -80    
-144   384    
80     256    
-128   64     
176    112    
-80    48     
-96    -32    
112    64     
-80    48     
0      112    
80     192    
-48    208    
112    192    
-176   96     
-96    -32    
-144   -16    
64     16     
80     128    
-96    32     
48     112    
16     0      
0      -16    
160    48     
-96    80     
96     64     
0      48     
0      80     
-160   0      
16     128    
112    -96    
-256   176    
176    -224   
-32    112    
-176   16     
0      208    
32     32     
-32    -16    
-16    -16    
0      128    
-272   -80    
96     -144   
-144   16     
-80    32     
-48    64     
-64    16     
64     32     
-240   -80    
16     160    
-176   -64    
-176   -32    
64     64     
256    240    
-192   48     
32     -32    
224    176    
16     48     
-32    32     
-48    144    
192    0      
-32    -96    
160    80     
48     -80    
48     144    
288    240    
-32    176    
144    96     
16     -128   
256    -16    
-256   208    
208    208    
-64    144    
-32    144    
-256   -144   
-48    -240   
176    64     
-160   240    
-32    16     
-144   -16    
176    48     
96     -64    
-48    64     
128    208    
-464   320    
144    336    
-64    208    
-96    64     
80     176    
-416   -176   
-96    -96    
-192   -32    
-16    272    
-240   -48    
-64    -208   
-432   -256   
-64    -160   
-160   112    
80     368    
-384   96     
-96    -272   
-32    -96    
-240   -96    
512    -80    
-96    -144   
128    -48    
224    192    
224    64     
-128   16     
0      -352   
368    96     
-352   128    
160    -80    
-192   -48    
336    96     
-80    64     
128    192    
-112   80     
-144   -128   
160    -240   
176    -48    
256    64     
-224   64     
48     48     
288    -176   
144    96     
48     48     
176    32     
144    128    
-112   -64    
64     112    
320    64     
256    176    
-416   128    
64     -112   
0      160    
144    16     
-96    -192   
80     80     
-16    -80    
48     32     
0      16     
96     -80    
128    48     
128    144    
128    96     
64     32     
128    112    
-112   128    
96     80     
96     112    
128    112    
-32    32     
160    48     
-32    -64    
64     64     
48     -496   
32     48     
80     80     
-32    0      
144    224    
144    -32    
-256   -240   
192    64     
32     48     
128    64     
-112   64     
-32    -64    
0      96     
144    -160   
160    -48    
-48    -288   
0      16     
-112   -48    
112    -224   
-64    -720   
-192   -336   
80     112    
288    320    
-32    80     
-128   112    
112    128    
128    -112   
32     96     
128    -144   
64     112    
48     -48    
80     48     
-208   -1136  
288    176    
-48    -384   
384    48     
-48    160    
64     208    
-32    -512   
128    128    
112    0      
80     -96    
-112   -96    
336    160    
-96    192    
64     -496   
48     320    
320    80     
-208   48     
272    96     
32     16     
48     192    
-32    288    
0      48     
-96    -976   
384    -256   
-32    480    
96     -64    
80     -48    
96     160    
192    -384   
-64    -64    
192    -48    
0      336    
32     -272   
-112   -896   
224    -96    
256    944    
80     592    
16     -80    
16     -224   
160    48     
16     176    
128    -192   
-16    176    
368    208    
-96    288    
0      -128   
16     16     
128    -16    
-16    -1264  
144    144    
-16    -416   
80     -480   
-112   -80    
368    -176   
160    96     
32     352    
0      -16    
208    288    
-48    96     
-32    -112   
48     -96    
-16    -1280  
768    592    
-464   592    
-128   0      
-400   -704   
128    -928   
-144   -400   
-96    -288   
176    -128   
-48    -480   
224    32     
-112   -208   
304    272    
176    400    
224    48     
-96    -544   
-224   -176   
80     64     
336    608    
-400   0      
-224   176    
128    -368   
-32    -192   
416    656    
48     464    
96     -272   
288    -1216  
-208   -48    
128    -16    
-144   -112   
80     48     
144    -144   
32     -112   
176    224    
-224   144    
-176   -160   
-496   64     
-96    512    
320    -384   
-64    -320   
192    128    
96     -368   
-96    400    
240    112    
-256   -208   
96     112    
-160   48     
160    -48    
208    288    
-368   192    
112    -128   
-16    32     
240    -144   
-544   -1024  
384    -16    
-96    192    
64     0      
-160   -128   
240    -944   
-240   32     
272    -544   
96     240    
-336   -480   
272    336    
-240   112    
0      -320   
-192   -272   
32     32     
-624   64     
-128   208    
-144   -48    
-80    -656   
96     400    
240    192    
-144   -144   
16     -144   
128    112    
96     112    
-176   -352   
-32    16     
112    80     
-192   16     
-160   -160   
-144   16     
16     64     
-400   96     
-64    0      
-16    -128   
416    160    
128    192    
32     -800   
192    -32    
48     288    
0      32     
-32    96     
144    -16    
-240   96     
192    -80    
64     -224   
-224   -672   
-752   -240   
112    -448   
112    0      
576    416    
-208   448    
48     -544   
-96    -320   
-352   -32    
256    -128   
-144   128    
48     -304   
-160   -96    
80     -304   
-160   -96    
0      -176   
160    16     
128    -32    
-96    48     
256    64     
384    224    
-496   96     
144    -416   
-352   -400   
432    -16    
-208   160    
32     -80    
-64    -16    
96     -96    
-16    32     
48     160    
64     240    
32     -160   
-32    16     
-976   -208   
0      80     
16     80     
-1120  240    
0      144    
-880   -64    
16     -80    
288    0      
-336   16     
80     112    
0      -16    
-16    32     
48     144    
-368   -256   
-32    96     
-160   256    
-272   224    
-48    96     
-80    224    
-208   -32    
-224   16     
144    -48    
-336   -48    
-48    -64    
80     48     
128    32     
-48    -128   
80     32     
-384   -96    
112    64     
-64    -80    
80     96     
-16    128    
-256   48     
16     112    
-288   0      
0      48     
-464   64     
64     0      
144    -64    
-48    -16    
336    -48    
-16    128    
192    -48    
-80    80     
240    144    
-416   -48    
-48    0      
-48    16     
-32    -48    
144    0      
-80    0      
0      0      
96     -48    
-1056  -288   
-80    -592   
0      -336   
112    448    
96     512    
-96    128    
-112   -64    
64     96     
-160   -16    
144    -32    
-128   80     
112    48     
-160   -48    
32     48     
-416   -48    
16     144    
-112   64     
-32    64     
0      80     
0      -64    
-128   16     
-64    0      
16     -64    
-48    80     
112    16     
-160   -16    
-96    64     
96     176    
-176   128    
-32    208    
48     432    
256    336    
-720   -224   
144    -96    
224    -144   
-336   176    
272    16     
-224   48     
96     144    
-128   0      
-64    32     
16     16     
16     64     
112    32     
-464   -672   
16     -176   
-48    304    
-576   -224   
-64    48     
64     -32    
-48    128    
96     128    
-112   0      
0      -80    
240    272    
-48    32     
0      112    
16     64     
-16    16     
80     160    
-240   -160   
-144   -96    
16     112    
-464   -304   
544    176    
-240   128    
0      -32    
-160   64     
224    144    
-240   48     
160    192    
-384   32     
384    80     
-240   208    
-288   48     
-80    32     
-64    96     
160    -16    
-80    80     
64     -64    
-192   48     
32     32     
-80    48     
144    -48    
-160   -32    
208    96     
-272   0      
64     48     
-64    0      
-96    -96    
0      -48    
96     192    
-304   -96    
32     144    
16     -32    
32     80     
80     32     
32     64     
112    0      
48     -32    
-48    16     
-32    0      
-32    64     
-64    96     
80     80     
-96    0      
384    304    
-192   96     
272    144    
64     288    
128    240    
-176   240    
144    64     
-144   -16    
-16    16     
128    64     
48     32     
192    48     
-128   128    
192    176    
-224   -32    
-64    -352   
-32    144    
96     -128   
-128   -96    
96     288    
-32    160    
48     80     
16     -192   
-144   -112   
416    288    
-224   336    
64     -32    
-16    -176   
48     112    
80     816    
-288   -624   
320    -16    
-192   176    
160    32     
-96    80     
-80    80     
416    144    
-160   64     
128    64     
-16    64     
-16    16     
16     144    
224    176    
-320   -112   
160    128    
272    144    
-256   -496   
320    -32    
-48    336    
-16    192    
80     48     
-32    112    
64     384    
64     -240   
-80    192    
-96    16     
64     -144   
-176   16     
160    -208   
-80    64     
96     -2032  
16     0      
16     0      
112    32     
16     0      
160    -32    
-176   48     
144    80     
-224   96     
96     208    
-64    112    
-240   -128   
144    -480   
-64    128    
80     80     
-176   -704   
-80    -1168  
240    -384   
80     0      
-224   -592   
96     -448   
128    192    
-64    192    
160    80     
-64    112    
16     64     
-32    160    
32     16     
-128   -112   
272    48     
-96    64     
80     -16    
-16    96     
224    112    
-80    -96    
160    16     
96     736    
304    448    
64     336    
80     368    
-48    384    
160    112    
176    368    
-128   -80    
64     48     
80     576    
704    1120   
-192   -1824  
64     32     
-320   80     
320    -96    
-288   -304   
336    -144   
-160   -384   
128    -144   
528    -96    
96     816    
240    400    
-176   -256   
128    -320   
128    -128   
112    224    
32     -272   
640    912    
-448   -1392  
-256   -864   
352    -640   
112    848    
192    -160   
160    48     
208    400    
96     80     
-208   -48    
64     -224   
-48    -208   
-240   -112   
-96    -1024  
224    -1216  
-32    464    
64     -352   
240    112    
-112   -208   
-368   -400   
-64    384    
160    368    
48     544    
0      192    
-416   -1184  
-160   -720   
144    -64    
16     -64    
32     -64    
192    -576   
-64    -128   
32     -528   
-96    224    
432    96     
304    224    
48     80     
32     256    
144    -160   
-48    -208   
400    192    
-112   -48    
-48    64     
-128   -352   
-80    80     
208    -496   
-80    32     
96     -1296  
96     192    
-64    96     
176    464    
16     144    
80     64     
240    208    
-48    80     
272    640    
96     144    
-32    -16    
160    -64    
336    240    
-176   -64    
-80    64     
192    -224   
-48    -192   
304    32     
80     -432   
32     48     
-976   -48    
288    -176   
-144   -16    
16     -560   
176    -64    
-240   -1360  
448    64     
-16    208    
32     -176   
80     80     
144    -400   
80     -1120  
32     16     
80     -320   
-32    160    
-64    112    
-128   -80    
32     -112   
48     -192   
16     -96    
-48    -224   
112    -16    
128    -48    
-48    -48    
96     128    
32     80     
-64    -240   
240    32     
16     0      
224    64     
-144   -48    
64     -112   
-192   -16    
192    80     
-64    -32    
64     16     
144    -16    
-32    -1440  
48     0      
-112   -112   
320    112    
32     112    
64     80     
-112   -144   
160    -176   
-112   -16    
96     -208   
-624   0      
144    96     
-96    -48    
112    -208   
32     48     
176    -576   
-32    0      
-64    -208   
144    -80    
320    80     
-224   96     
80     -160   
-16    -32    
128    48     
48     48     
-448   -80    
160    -240   
192    -80    
176    -96    
0      32     
208    -112   
80     -16    
112    -336   
48     80     
48     -128   
224    32     
16     128    
-32    -80    
-16    64     
112    32     
-416   -240   
16     -320   
-240   0      
0      -48    
-64    0      
160    -112   
112    112    
-32    -208   
128    32     
16     -48    
96     64     
48     32     
96     -16    
-176   -80    
128    48     
64     0      
-16    0      
-304   -32    
96     0      
-576   48     
-144   -400   
48     144    
224    -816   
-112   176    
128    -16    
48     64     
-224   -112   
176    -64    
-448   -32    
64     -96    
-48    -160   
112    96     
-224   -96    
80     64     
-448   -48    
176    -112   
-80    96     
352    192    
-368   112    
-272   32     
-112   -96    
-16    48     
96     -32    
-112   -16    
144    32     
-144   112    
128    16     
-128   -32    
128    -96    
-576   -48    
288    -16    
-48    128    
192    -176   
-80    80     
160    176    
-240   48     
-16    -16    
-64    48     
-32    240    
208    -128   
-160   0      
112    -176   
-336   -192   
96     -48    
-32    128    
-528   -128   
-160   32     
-576   -240   
-192   -208   
16     -432   
-96    0      
224    224    
-368   144    
16     48     
16     304    
16     144    
16     48     
-80    -144   
-496   -64    
48     160    
-896   -208   
32     32     
-48    -64    
-48    -48    
-96    -96    
-208   64     
16     -64    
-96    -32    
176    256    
-1328  -96    
-144   64     
240    128    
16     16     
-272   -352   
320    96     
-224   -288   
256    112    
-96    -144   
-96    -192   
48     -64    
-48    16     
-176   -400   
-400   -240   
240    80     
-320   144    
16     288    
-416   80     
-96    -48    
32     -48    
64     112    
-16    -32    
-64    176    
-112   48     
0      32     
-64    144    
96     32     
-240   -16    
144    64     
-64    16     
-128   -96    
16     0      
-528   -96    
-16    -64    
-176   -144   
160    -128   
80     96     
128    112    
-96    336    
80     192    
224    320    
-272   272    
224    304    
-368   -352   
240    -176   
-160   192    
-32    176    
-192   96     
-32    -48    
224    224    
-160   -96    
-16    -128   
-112   -48    
-32    80     
-112   -128   
400    208    
-400   -112   
336    0      
-384   -400   
256    336    
-336   -64    
144    192    
-112   -16    
128    160    
-1584  144    
0      96     
-272   -336   
224    176    
-128   432    
-160   -112   
144    -64    
-80    256    
-16    224    
-48    -32    
32     64     
32     80     
-32    64     
-48    -16    
80     96     
-224   -32    
16     112    
64     48     
16     32     
64     96     
288    208    
-272   384    
-32    0      
304    48     
-288   48     
80     80     
-32    -16    
-16    112    
-144   -128   
-32    160    
-256   0      
-16    16     
-64    144    
16     64     
-16    -32    
80     -16    
-224   -192   
96     -32    
-96    32     
64     80     
-48    -32    
-128   -128   
144    144    
-112   -208   
192    144    
-96    208    
-240   144    
96     -48    
-192   128    
48     16     
16     80     
-144   96     
80     16     
-304   -128   
224    -800   
0      -32    
-32    176    
-304   -224   
80     -272   
128    192    
-32    96     
48     16     
16     96     
80     128    
-32    16     
48     144    
16     32     
-16    16     
-32    80     
144    32     
-96    64     
64     64     
-96    -336   
-64    144    
224    176    
112    752    
0      288    
0      0      
-16    256    
288    -32    
96     416    
-32    208    
-176   48     
-32    944    
288    -752   
-288   -944   
256    672    
-176   368    
-176   -368   
-64    80     
224    192    
-32    0      
-240   -336   
320    -384   
192    176    
160    240    
-176   48     
192    -16    
-32    352    
-16    80     
256    -224   
-384   -112   
112    304    
-32    -96    
0      192    
192    -16    
-176   -192   
192    -64    
-64    -32    
-16    96     
-96    -48    
112    16     
80     160    
128    352    
-64    368    
128    -304   
-112   -288   
176    16     
-112   -224   
112    -320   
128    -64    
112    96     
32     48     
96     -80    
-64    32     
-128   -496   
48     0      
96     128    
-112   16     
-176   48     
448    352    
-432   -192   
336    336    
112    208    
-192   0      
496    -48    
-112   96     
304    96     
-144   112    
-48    -208   
96     208    
-16    16     
48     16     
-16    -32    
-128   64     
128    240    
-128   0      
-32    -256   
128    64     
-128   -528   
176    96     
-32    128    
-32    48     
128    128    
64     176    
-256   96     
64     192    
144    64     
64     96     
-224   -96    
224    32     
-32    16     
-112   -288   
-48    -64    
240    112    
0      96     
128    -32    
-32    80     
64     -16    
-48    112    
160    -64    
16     112    
96     96     
-128   -192   
80     -64    
0      80     
-48    64     
16     -128   
64     208    
96     -176   
-48    64     
160    -1648  
-80    32     
0      80     
-64    80     
0      80     
48     112    
16     16     
32     80     
64     64     
-80    112    
-16    48     
-48    32     
192    208    
-128   -176   
112    144    
64     -144   
208    64     
-112   64     
192    176    
-32    240    
-96    80     
208    32     
-48    176    
192    32     
-96    -48    
160    128    
160    -192   
224    368    
-288   -176   
0      64     
240    -448   
192    64     
-160   -1024  
96     80     
-96    -80    
112    112    
-32    32     
272    -64    
-208   -32    
256    -96    
-160   128    
416    64     
-320   144    
288    -176   
-128   96     
80     -224   
128    16     
-32    -304   
224    32     
-16    112    
112    96     
-48    160    
256    176    
-80    0      
64     -96    
192    128    
0      16     
144    144    
-96    -32    
16     80     
128    -64    
16     32     
-96    -80    
16     176    
64     64     
0      48     
-48    48     
240    -416   
-48    -112   
64     -160   
96     128    
80     208    
-64    -32    
144    -352   
16     128    
208    80     
-160   96     
0      0      
48     -432   
48     16     
144    -624   
-128   32     
-1424  -80    
256    -448   
80     0      
64     -608   
-64    -320   
240    -464   
-48    -160   
224    80     
-176   32     
80     -592   
-160   -48    
128    -240   
-16    48     
80     -112   
-48    -112   
-208   -80    
64     -592   
64     -144   
256    -80    
16     -16    
64     -736   
48     32     
-16    128    
64     -128   
128    -256   
192    128    
112    -32    
-64    112    
48     -32    
96     -16    
-368   -32    
-16    -64    
160    -160   
32     -80    
48     0      
128    272    
128    0      
16     -1328  
-48    -144   
176    -112   
-304   112    
192    -48    
-160   -16    
160    -64    
-48    0      
64     -96    
-128   -16    
-576   -112   
96     32     
16     -176   
-240   -432   
64     -208   
192    -48    
64     -64    
80     -16    
80     448    
-320   -272   
320    -64    
-128   -144   
160    -240   
-192   32     
96     32     
-96    32     
112    -64    
-16    -96    
-96    -304   
240    176    
80     -32    
144    32     
208    -272   
-112   176    
208    144    
-448   96     
160    112    
-256   -32    
-96    -16    
-112   -208   
-64    -96    
48     -16    
-1136  128    
-272   48     
-48    96     
16     -144   
272    32     
-96    -528   
144    176    
144    -96    
-96    -112   
-288   -464   
48     -320   
-256   -160   
96     16     
-224   48     
-64    -64    
144    128    
-48    144    
128    64     
-32    -304   
288    112    
-32    -512   
80     224    
48     -864   
128    -112   
-144   -160   
272    -208   
-80    192    
208    -112   
0      160    
176    -64    
-48    80     
160    -144   
-48    -16    
64     -224   
80     160    
-272   -272   
256    -592   
48     624    
432    208    
-400   -96    
0      80     
-176   -464   
192    -32    
-48    288    
-128   48     
-96    48     
96     16     
-800   -288   
240    -288   
-176   -208   
256    176    
-16    272    
-48    -32    
-192   80     
-16    -48    
16     -16    
48     48     
-32    208    
0      400    
128    -336   
-208   -224   
96     128    
-32    256    
-880   80     
96     64     
-1216  -192   
0      0      
-128   -48    
-192   48     
64     64     
-192   80     
-48    -16    
-16    0      
-128   -16    
16     48     
-160   96     
368    64     
-48    320    
80     240    
144    384    
-320   -128   
48     -64    
-80    -96    
160    -80    
-64    32     
-112   304    
-160   -32    
-1456  -176   
48     96     
-16    32     
0      144    
-128   -144   
-64    32     
-112   -240   
0      16     
-32    -64    
32     64     
-48    32     
-80    -208   
80     -224   
144    384    
-16    368    
0      48     
80     192    
-336   160    
32     -240   
-160   -240   
96     -192   
-640   -1008  
368    -224   
-192   -144   
224    96     
-64    352    
-96    0      
-16    96     
-64    48     
64     -32    
-96    80     
80     -32    
-496   16     
16     -16    
96     784    
-80    -32    
48     -96    
-112   80     
80     -32    
-64    32     
256    1152   
-464   -384   
416    -288   
64     560    
-64    -16    
-128   -224   
-64    -224   
-320   32     
208    224    
-128   -560   
240    -160   
112    208    
-96    368    
144    -272   
-96    -64    
48     160    
160    352    
-208   208    
-48    272    
-16    -48    
-176   -112   
-192   -48    
-320   -176   
224    -416   
-640   -160   
96     0      
64     16     
-240   -48    
112    48     
-16    -80    
144    -96    
-96    -112   
288    -48    
-208   112    
128    160    
-176   0      
32     -144   
-160   -112   
144    176    
-128   112    
-336   -96    
672    704    
-272   896    
-144   448    
-448   -80    
-144   -176   
32     -16    
-240   48     
-48    -48    
-240   -32    
192    96     
-176   64     
-160   -128   
-64    16     
-144   0      
-288   0      
80     112    
112    160    
-128   80     
-48    0      
176    192    
-176   -32    
0      -128   
-64    -16    
224    64     
-192   -32    
-96    -16    
80     -48    
432    608    
-640   -176   
80     336    
48     128    
-160   -32    
-48    -128   
144    -128   
-96    32     
-48    -48    
32     32     
-176   -32    
80     48     
-272   0      
0      0      
-112   48     
304    176    
-288   160    
32     48     
-208   -64    
288    208    
-32    112    
-32    16     
-16    32     
112    176    
-192   -16    
-48    0      
256    112    
-80    0      
0      32     
-80    -64    
-80    -48    
-32    -16    
144    -16    
-48    160    
160    32     
0      80     
112    64     
-32    80     
32     32     
0      48     
80     128    
48     176    
0      48     
160    64     
-96    -48    
112    0      
-48    144    
176    32     
32     112    
48     48     
96     96     
-128   -96    
-80    -144   
160    -80    
-128   272    
256    16     
-96    128    
-32    0      
32     64     
-64    -16    
192    48     
-192   16     
272    304    
-48    -144   
-32    -128   
48     192    
208    192    
-192   224    
64     208    
96     64     
-192   -112   
-64    64     
-272   -288   
432    -48    
-96    256    
192    128    
-112   -16    
16     -96    
96     112    
64     96     
-96    80     
-80    -48    
176    -32    
-64    112    
352    272    
-176   32     
0      48     
160    16     
160    144    
-64    48     
0      -896   
-32    16     
-48    -64    
272    240    
-112   112    
-32    128    
32     64     
16     64     
-32    48     
208    256    
48     208    
-96    80     
-128   112    
144    -112   
-96    80     
16     -368   
32     32     
16     0      
-32    48     
64     80     
-32    112    
0      64     
16     -32    
80     16     
-64    0      
112    128    
-48    176    
192    144    
-192   -48    
176    144    
-80    -288   
240    128    
-144   32     
-16    64     
64     112    
80     64     
16     16     
-32    -48    
224    -80    
0      0      
144    32     
-240   64     
96     16     
96     64     
-48    144    
160    -80    
-16    80     
112    -1424  
112    224    
-112   304    
272    288    
-80    32     
112    48     
272    176    
-64    240    
304    496    
-320   208    
176    256    
16     160    
208    192    
-192   -416   
272    224    
-448   -1200  
224    -64    
32     -688   
112    160    
-144   96     
16     80     
320    128    
-112   176    
48     -16    
96     -64    
128    16     
192    -192   
176    -96    
64     -208   
96     32     
32     -304   
128    144    
0      272    
-128   -64    
224    128    
-384   48     
16     -288   
-48    96     
304    304    
-96    160    
112    448    
208    544    
0      48     
224    -112   
-80    0      
-80    -64    
80     48     
64     -256   
32     -16    
-16    -48    
48     -144   
-112   -304   
160    -320   
160    32     
272    -208   
320    416    
-16    -144   
128    -96    
-16    -272   
-48    -48    
192    -192   
32     -128   
32     -848   
144    176    
144    176    
128    272    
-96    -96    
192    -240   
0      -224   
48     144    
96     64     
-208   -240   
16     -640   
-112   16     
32     736    
400    -720   
-288   528    
80     -336   
112    -112   
-96    176    
-32    -544   
-48    272    
-496   16     
64     -544   
-128   -400   
-448   -336   
672    -208   
-272   16     
-48    48     
-16    -48    
192    0      
-112   112    
-16    -80    
320    -304   
-192   48     
128    48     
64     -304   
-208   16     
256    96     
-288   16     
48     -416   
416    -16    
-80    -496   
352    -128   
-224   112    
64     288    
128    -496   
-176   -384   
240    -464   
-16    0      
-32    160    
512    400    
-464   80     
144    -384   
384    -48    
-96    32     
112    -176   
16     -16    
144    32     
32     -496   
0      -80    
-80    -288   
112    -128   
240    304    
-160   304    
192    112    
-16    0      
-64    16     
-128   -304   
-464   -32    
-32    -16    
48     16     
48     -112   
64     -64    
48     -432   
-192   -32    
96     240    
16     80     
64     16     
16     48     
-192   -144   
-48    -32    
-64    -400   
16     128    
-384   -736   
48     -608   
80     -304   
80     -288   
-160   144    
160    -64    
-160   -80    
208    -1472  
0      224    
-16    -160   
208    -48    
-160   -48    
272    704    
-144   64     
-16    -576   
48     -32    
-16    320    
-208   32     
304    -16    
-432   112    
176    -48    
80     -32    
-16    48     
16     128    
-16    -352   
256    384    
-64    416    
336    80     
-48    176    
64     -176   
160    32     
-64    336    
-16    48     
96     -160   
16     160    
80     64     
-16    48     
32     -400   
32     32     
-48    192    
64     32     
-272   -992   
240    400    
-288   304    
-160   224    
112    -128   
-128   -400   
80     96     
-80    528    
176    48     
96     -528   
-144   224    
-32    -192   
48     80     
224    192    
0      224    
32     144    
64     -240   
-112   -80    
336    320    
80     336    
16     112    
-176   208    
-16    16     
144    128    
-96    -112   
240    48     
160    32     
192    -112   
-16    112    
-400   -256   
-48    48     
176    64     
16     64     
-48    48     
128    208    
16     64     
-48    128    
-64    -224   
176    256    
-384   -352   
352    48     
-288   -96    
-112   -96    
-240   80     
-592   0      
-16    80     
-928   -16    
176    48     
-64    -48    
-512   -768   
224    -384   
-144   -144   
512    -144   
-256   -192   
-144   -288   
-112   64     
-32    144    
-224   112    
-48    144    
-32    208    
16     192    
-64    192    
80     112    
-592   -160   
-16    -80    
16     -112   
480    272    
-400   -576   
-32    32     
-80    -160   
-32    144    
128    80     
-448   -32    
80     48     
-288   -48    
80     -64    
-176   -32    
16     32     
-208   -48    
-160   -80    
304    16     
0      176    
176    80     
-176   128    
16     160    
-64    560    
-176   368    
-32    112    
-192   -288   
-320   -192   
112    -32    
0      176    
0      48     
-128   32     
224    32     
-1360  -96    
128    256    
-32    48     
-224   240    
64     32     
-160   80     
-96    32     
0      96     
-176   48     
-96    16     
112    48     
-16    80     
-64    -16    
-160   48     
-16    48     
-304   -16    
16     112    
48     0      
0      -80    
160    112    
-192   96     
16     224    
-80    32     
48     80     
112    48     
-192   -32    
16     0      
16     64     
-208   -32    
-16    -16    
-64    -48    
160    96     
-768   176    
-240   112    
224    48     
-192   -16    
160    64     
-32    64     
96     16     
-112   16     
-32    0      
-224   32     
272    48     
-176   -80    
144    48     
-160   32     
192    48     
-1056  -112   
48     64     
48     0      
-48    32     
128    0      
448    544    
-432   336    
-48    16     
128    96     
96     96     
-128   -32    
-160   -192   
320    -48    
-208   128    
64     80     
-272   48     
80     176    
96     208    
-112   80     
0      -32    
-64    -16    
160    96     
-48    96     
48     144    
48     80     
128    -16    
-176   16     
64     96     
-176   -16    
0      80     
80     80     
96     64     
-48    -16    
32     64     
-64    -32    
-48    -128   
256    -32    
0      112    
-32    128    
-96    16     
-112   -144   
-160   -176   
288    208    
-112   240    
0      176    
48     48     
32     48     
80     256    
304    320    
-240   352    
128    416    
96     272    
192    144    
-112   -32    
-224   -48    
80     -64    
-112   224    
160    240    
-32    128    
48     96     
-128   -96    
0      -96    
-80    96     
208    128    
-144   96     
288    96     
-160   688    
64     160    
32     -160   
-32    96     
64     16     
-96    32     
240    160    
-336   80     
144    -336   
16     192    
-16    -32    
0      -336   
240    480    
-32    -176   
-96    -80    
32     -160   
-32    144    
-16    -32    
80     -224   
320    368    
-64    224    
32     -96    
80     32     
208    96     
-160   0      
320    48     
32     176    
-96    144    
16     -240   
144    352    
144    352    
48     80     
96     64     
-160   -80    
64     -96    
-16    -64    
240    240    
-240   48     
80     352    
352    416    
-192   -16    
192    -80    
16     48     
160    -48    
208    -64    
48     336    
80     192    
-368   -368   
64     -624   
288    640    
-64    320    
-48    -208   
176    288    
224    -288   
-240   224    
16     256    
144    -144   
-96    368    
240    96     
48     880    
160    -768   
-32    160    
96     16     
-208   -208   
144    -368   
-16    -96    
16     -144   
-80    -288   
-96    -1568  
352    544    
-112   240    
160    -272   
-256   160    
144    96     
-32    96     
-352   64     
544    0      
-240   -368   
432    -16    
-256   -64    
208    16     
16     16     
48     432    
-96    -512   
256    144    
-160   224    
144    112    
64     48     
-80    -496   
-224   656    
112    -32    
-48    -48    
-80    288    
80     -64    
-208   -112   
-16    128    
-16    -240   
176    144    
48     -512   
-64    64     
128    -2096  
-48    48     
64     -432   
-32    448    
48     -528   
32     -176   
-144   80     
-48    -352   
-48    384    
32     -448   
-96    224    
96     -16    
48     -96    
96     208    
80     -160   
272    144    
-144   112    
624    -80    
-576   -576   
96     304    
-112   -160   
64     -32    
0      288    
16     -272   
128    496    
0      256    
-128   -48    
240    -576   
-224   -192   
240    -304   
208    288    
-48    96     
160    192    
-16    592    
-64    -192   
-64    16     
240    80     
-48    64     
16     96     
112    -112   
80     48     
16     -976   
32     96     
-80    -256   
192    -192   
-144   -368   
320    48     
-160   -560   
304    688    
0      -32    
112    48     
160    96     
80     32     
80     352    
144    -544   
32     -32    
224    48     
-176   144    
160    0      
96     32     
-272   -864   
48     -128   
-16    -416   
48     16     
160    240    
96     -448   
224    352    
-64    -144   
0      -2048  
176    112    
-32    -48    
112    48     
176    128    
-64    96     
64     128    
336    160    
-16    544    
80     432    
-112   80     
16     192    
352    -464   
64     -480   
-1664  -384   
64     -528   
224    -112   
144    -432   
-208   -144   
64     -432   
32     -240   
160    96     
32     0      
112    -144   
-96    160    
128    -32    
-96    160    
208    -128   
-16    -208   
-144   16     
336    0      
-192   80     
192    -240   
-192   -64    
192    -32    
48     -80    
0      128    
416    208    
0      -224   
288    192    
-288   0      
144    -160   
80     64     
64     0      
-16    112    
96     -32    
112    48     
192    -48    
64     -80    
16     -272   
48     -64    
128    -672   
176    96     
-208   -64    
80     -32    
176    128    
-112   -16    
80     16     
-16    -96    
-192   0      
112    0      
-752   -112   
-64    -112   
176    -16    
32     -96    
-80    -160   
112    -864   
-16    -112   
160    -416   
-16    80     
352    432    
352    144    
-528   -192   
240    -64    
-576   -304   
128    -368   
-80    -288   
192    416    
64     48     
80     -208   
-128   -48    
16     -208   
304    208    
32     -432   
-48    0      
-32    -160   
160    -128   
-112   144    
320    0      
160    384    
-96    80     
-208   -32    
-144   -272   
-1024  0      
112    32     
-416   160    
80     -32    
-32    48     
96     -384   
-144   -208   
288    -336   
32     -320   
-16    -80    
-48    -112   
0      -304   
192    0      
-240   128    
176    144    
-368   64     
128    16     
-272   -304   
304    -160   
-224   160    
32     -864   
-192   64     
48     48     
16     32     
-96    96     
64     48     
-240   -48    
144    64     
-144   16     
144    80     
-112   80     
96     16     
96     0      
-192   -112   
144    32     
160    -48    
0      16     
192    80     
112    16     
-112   16     
-48    -64    
128    96     
32     96     
-144   128    
64     96     
-288   -144   
240    -208   
32     144    
176    -48    
-80    64     
-320   32     
-1216  0      
-48    -80    
-1456  -32    
-16    16     
144    48     
-112   -16    
48     0      
-80    -32    
-112   -240   
32     -48    
-1216  -160   
96     80     
-208   -96    
0      64     
48     32     
-112   -48    
0      -80    
-144   64     
144    128    
-320   128    
-48    -48    
128    176    
32     16     
-848   -64    
80     48     
-48    48     
64     96     
-176   -112   
112    112    
-144   16     
-32    -80    
496    352    
-208   240    
-256   144    
-448   -128   
-32    0      
-528   -240   
-64    16     
-176   128    
112    208    
0      208    
16     0      
-16    -160   
224    240    
-160   -208   
-48    -80    
80     112    
16     112    
-16    64     
-176   -240   
-32    -96    
-464   96     
16     448    
-128   256    
32     -192   
-16    48     
16     -240   
-80    -16    
-32    304    
-16    -224   
32     288    
208    144    
-176   432    
32     80     
64     112    
0      96     
-112   144    
-16    -208   
-272   -32    
-64    -416   
-224   -192   
96     96     
0      96     
336    320    
-368   -224   
0      -16    
112    144    
-192   32     
96     32     
-80    64     
64     64     
-112   16     
160    80     
-608   -80    
192    112    
-160   352    
64     -288   
-64    -128   
-16    128    
-16    64     
-336   -160   
-16    -176   
16     144    
144    480    
-416   -432   
-48    -208   
-256   304    
176    368    
-368   0      
-96    -64    
-1232  -128   
-208   -176   
272    -176   
-144   -64    
224    480    
80     336    
-336   -192   
368    -144   
-256   304    
-128   -96    
272    -320   
-80    16     
160    -16    
-48    80     
592    656    
-416   624    
-144   -272   
112    -432   
-16    -32    
16     48     
192    96     
176    192    
-80    144    
208    -80    
-32    96     
288    64     
-48    272    
304    -208   
-128   32     
160    112    
16     -288   
128    400    
16     112    
-144   -448   
464    496    
-160   784    
176    0      
-368   -672   
128    -208   
-48    512    
64     352    
-240   -368   
80     96     
-336   -160   
256    1136   
-256   -64    
-32    -320   
448    -112   
144    800    
-64    304    
96     -80    
-112   176    
-16    -768   
592    192    
-176   1056   
128    -176   
-64    -80    
0      176    
80     -32    
-144   -16    
80     -240   
144    -448   
400    496    
-112   368    
272    -176   
96     -240   
160    192    
64     336    
32     0      
64     208    
-80    304    
80     -128   
128    240    
-352   -208   
-64    320    
224    -32    
-128   48     
-16    64     
64     -352   
96     144    
-256   -512   
144    352    
16     176    
-112   -304   
96     -80    
144    160    
-304   -240   
112    -64    
256    256    
-352   64     
224    -96    
-144   144    
80     432    
64     -288   
144    352    
48     128    
0      -208   
16     144    
176    192    
-32    -224   
128    32     
96     -64    
96     128    
80     464    
-32    496    
272    -32    
-304   -208   
96     -80    
-32    304    
-16    480    
-112   -144   
32     -176   
112    272    
-16    208    
-64    32     
-80    -304   
32     160    
-144   -160   
32     -48    
-32    32     
112    -32    
80     -16    
-128   48     
320    80     
-128   192    
256    96     
-96    80     
112    32     
96     32     
-240   160    
-64    80     
0      80     
288    272    
-256   304    
-32    224    
32     -96    
112    16     
48     32     
-32    32     
32     0      
48     176    
-48    240    
-80    224    
-176   0      
144    80     
16     32     
-16    64     
176    0      
48     144    
-96    -80    
-16    96     
16     96     
160    240    
176    304    
-224   -16    
80     112    
176    64     
-16    32     
64     0      
-16    48     
48     0      
48     112    
-32    -160   
-272   -240   
144    -416   
208    64     
-112   112    
160    64     
-16    -112   
80     64     
64     -112   
80     64     
-32    16     
112    160    
80     0      
0      -128   
160    64     
-32    -160   
128    128    
80     -144   
-32    -16    
320    -1728  
240    0      
384    464    
-272   272    
32     0      
144    16     
64     112    
192    64     
-208   -112   
368    -176   
96     496    
-48    -16    
0      128    
144    -112   
64     -32    
112    -832   
96     208    
64     -656   
-64    -16    
144    -304   
-64    -128   
80     -128   
-32    -16    
128    112    
240    32     
-144   32     
304    -224   
-16    176    
272    -448   
-48    32     
208    -352   
352    464    
-320   80     
32     48     
-80    -48    
80     80     
-16    48     
-144   -80    
0      16     
-144   -304   
112    48     
-32    -192   
-192   -464   
32     -64    
112    272    
-304   48     
48     320    
-16    -208   
-64    160    
80     208    
-16    144    
80     16     
-80    -176   
16     16     
128    -144   
80     0      
112    -32    
16     32     
-176   -256   
272    32     
-112   -128   
368    0      
-96    -16    
112    224    
-112   80     
48     -128   
-240   64     
352    -224   
-336   -672   
528    -96    
-208   -1024  
368    -32    
16     16     
160    -176   
176    80     
32     -160   
144    -1488  
288    144    
-176   -32    
80     240    
-96    -176   
0      -416   
-1504  -240   
208    -96    
80     -32    
-16    32     
112    -48    
192    -960   
-112   -144   
176    240    
-192   -96    
208    -304   
-80    128    
192    -112   
-64    32     
-16    -368   
208    -96    
-192   -48    
160    -48    
-48    -80    
32     -544   
80     64     
224    -16    
16     16     
144    96     
-112   16     
208    -96    
112    0      
0      -80    
-32    80     
-32    144    
0      -16    
-112   -176   
352    48     
64     -16    
-64    -48    
0      -64    
224    -96    
-32    -304   
48     -416   
112    -16    
-48    -144   
144    192    
-80    -48    
0      -304   
-96    -400   
336    160    
48     144    
-80    -48    
-304   -64    
240    256    
-176   -64    
96     -144   
-64    -144   
-64    -352   
-48    -176   
48     -368   
32     96     
112    128    
16     16     
32     80     
-32    -192   
-96    0      
64     -80    
-48    64     
48     64     
48     -384   
192    -352   
-176   160    
-128   -608   
224    432    
32     -256   
-128   176    
160    -320   
128    464    
-224   -288   
128    -352   
0      -48    
16     208    
-48    -80    
-64    -32    
-976   -240   
0      -192   
-432   128    
48     -368   
112    80     
144    -112   
16     -64    
-272   -224   
208    -80    
-160   64     
112    496    
-400   0      
-144   -288   
-32    64     
32     0      
-288   64     
112    -48    
112    224    
80     224    
-240   -128   
128    -464   
-48    160    
-64    96     
80     48     
-144   144    
96     -80    
-208   -48    
96     -96    
-128   32     
160    16     
80     80     
80     -64    
16     32     
64     -256   
16     64     
16     -448   
128    0      
-160   96     
-32    16     
-224   -240   
128    -432   
-208   -128   
176    -64    
-208   -80    
160    176    
0      112    
-192   -128   
128    160    
-960   448    
240    192    
-944   -288   
-432   224    
32     48     
-464   -32    
-144   -48    
-224   -400   
64     -176   
80     32     
-208   224    
176    432    
-160   -368   
-304   -288   
-48    160    
-432   176    
336    272    
16     320    
-512   448    
-336   192    
-448   -224   
-64    624    
-208   -16    
-32    -432   
-48    -224   
80     -272   
240    224    
-208   352    
208    -192   
240    544    
-368   32     
48     48     
224    -128   
-96    240    
32     -48    
-272   -384   
432    80     
-192   336    
-16    -432   
-672   96     
32     352    
176    656    
-208   112    
272    -448   
32     224    
48     16     
-272   -320   
-160   -368   
208    352    
160    144    
-128   -64    
96     304    
64     144    
32     -112   
-96    -16    
112    144    
-80    64     
448    528    
-256   720    
-144   64     
464    -448   
-224   464    
480    848    
176    16     
-160   -368   
-32    -240   
0      0      
64     128    
-96    -208   
0      -208   
32     -48    
-448   432    
176    272    
-64    -64    
-64    -192   
-16    16     
240    128    
-288   96     
48     112    
-80    144    
32     32     
-208   144    
160    144    
-160   208    
-64    48     
128    160    
-592   -16    
320    320    
-144   112    
240    256    
-224   256    
16     96     
32     224    
112    80     
-96    16     
128    160    
-128   176    
-48    16     
-128   -48    
96     176    
0      -80    
-352   -64    
144    64     
-560   -96    
-128   -128   
64     32     
-96    -16    
-16    112    
-16    256    
80     80     
-128   528    
64     96     
-96    16     
32     80     
-80    64     
128    128    
-176   -64    
144    80     
-1360  -208   
48     -32    
-48    -64    
48     -64    
0      -16    
144    176    
-64    320    
176    16     
-64    16     
-64    128    
-96    128    
-160   32     
80     64     
-304   -256   
320    144    
-176   144    
80     32     
-240   208    
208    160    
-256   -448   
368    -176   
-16    240    
-304   -160   
192    -80    
288    32     
-16    112    
-160   96     
64     144    
-112   -48    
64     112    
-16    192    
128    80     
-128   48     
96     32     
48     96     
16     48     
-64    32     
32     80     
112    160    
-128   112    
-16    64     
-64    32     
64     112    
-192   0      
32     16     
112    112    
128    128    
-80    64     
112    128    
-112   16     
-112   -128   
272    -64    
-240   96     
144    64     
-96    -32    
48     112    
64     48     
-176   -208   
240    -64    
160    80     
-144   64     
80     192    
192    32     
64     80     
-176   -80    
256    -64    
-48    48     
0      -16    
0      -16    
0      -32    
64     0      
-48    -48    
176    144    
112    128    
64     128    
48     128    
48     144    
16     64     
272    208    
-288   160    
48     -144   
48     -32    
144    256    
32     208    
-64    0      
16     48     
16     -48    
-16    -480   
80     144    
-112   -112   
208    144    
-48    80     
176    -64    
-48    224    
208    128    
-352   16     
144    64     
144    272    
-240   112    
16     -48    
-96    -112   
192    -160   
-80    -400   
128    -48    
64     272    
224    224    
-240   16     
128    16     
-64    48     
0      48     
-32    64     
0      32     
448    592    
0      96     
160    -240   
-16    128    
16     -96    
192    336    
160    64     
-80    -432   
144    128    
192    288    
80     0      
32     16     
80     160    
96     -16    
-96    96     
112    -144   
32     96     
-128   -16    
64     176    
192    0      
0      -336   
32     144    
192    -1008  
48     112    
-64    144    
160    32     
-96    -96    
320    64     
-112   192    
304    64     
-400   64     
304    80     
-32    96     
112    112    
0      64     
-112   -416   
96     80     
96     -320   
112    96     
-96    -864   
-80    32     
112    80     
0      16     
208    48     
-16    80     
64     -144   
32     144    
144    128    
-336   -128   
128    128    
160    16     
-96    144    
112    -320   
80     96     
272    -256   
-384   48     
320    80     
16     16     
304    144    
64     48     
160    160    
128    112    
80     160    
32     -128   
32     16     
192    -96    
-80    224    
64     -80    
48     48     
112    -896   
80     64     
48     64     
-160   -96    
64     -192   
48     144    
-96    -240   
128    80     
112    336    
-208   -608   
224    384    
-64    -368   
-32    -64    
352    -48    
-224   -64    
96     -128   
-16    320    
64     144    
464    992    
-624   -368   
144    176    
-96    -416   
64     -240   
176    480    
-176   -416   
240    64     
-128   -240   
112    112    
-112   -144   
224    128    
80     16     
-96    64     
128    -464   
32     96     
64     16     
48     112    
96     400    
64     112    
32     -160   
16     -512   
160    208    
-64    -16    
144    96     
-96    -112   
112    -176   
-16    -384   
128    -128   
128    128    
80     -848   
-96    -32    
336    -128   
-208   -96    
112    0      
64     -432   
-16    -144   
96     -640   
32     32     
144    128    
-32    -112   
-16    288    
-32    192    
112    -496   
-112   -80    
-32    -176   
-48    0      
32     -96    
-64    -288   
-256   -80    
288    144    
96     496    
48     144    
304    272    
144    -848   
80     144    
160    32     
-160   16     
224    -144   
-96    64     
176    -16    
-272   -224   
128    -128   
-144   -192   
-272   -48    
-112   -96    
240    -48    
-80    -208   
176    -64    
0      -240   
-112   -160   
272    -176   
-16    32     
16     0      
-128   96     
144    80     
-48    -16    
176    208    
-144   64     
48     -48    
160    512    
480    448    
-368   96     
176    -96    
32     -16    
-64    96     
80     -176   
-96    240    
96     -448   
-48    384    
352    288    
-96    -336   
256    320    
208    176    
-48    0      
-96    -320   
-848   -240   
752    64     
-512   -144   
304    128    
-64    -32    
80     -1184  
-272   -368   
96     256    
32     96     
-32    -320   
208    64     
-128   48     
208    96     
-192   -208   
352    -96    
-144   256    
48     -80    
304    -176   
0      -224   
-32    -48    
144    -176   
224    272    
-224   -688   
192    0      
-272   -240   
128    -480   
-352   -304   
288    96     
0      -16    
32     48     
-192   64     
224    432    
-1104  256    
-48    -144   
112    -64    
-224   -192   
176    128    
96     16     
160    -16    
-208   -288   
448    -480   
-304   -80    
656    96     
-336   240    
256    0      
-272   128    
144    -80    
-32    -16    
160    -112   
96     -64    
96     -112   
128    0      
80     -368   
368    -16    
-160   48     
416    400    
-272   416    
96     160    
-416   -80    
128    -64    
96     96     
-304   48     
-64    -48    
144    -96    
368    144    
-368   -288   
0      0      
-32    -224   
288    128    
-144   48     
64     16     
-192   16     
112    -32    
-112   32     
160    112    
-208   96     
112    16     
-64    80     
-176   -176   
64     96     
-432   -112   
112    208    
176    160    
-256   48     
-64    48     
-672   -32    
-208   64     
-144   -64    
-80    64     
80     -16    
0      96     
-112   -304   
-176   -64    
176    -32    
-16    -32    
-144   -224   
128    304    
-80    -80    
-176   -32    
-144   64     
48     32     
-128   192    
-592   160    
-176   32     
176    16     
-208   -32    
-336   -160   
32     48     
-192   -240   
112    16     
-16    -64    
-96    -80    
208    64     
-304   48     
48     48     
112    -32    
-64    16     
144    112    
-48    48     
-304   64     
128    -80    
-32    240    
256    -16    
-288   -32    
400    144    
-416   -224   
48     0      
-16    48     
0      112    
-32    0      
128    48     
48     128    
-256   32     
-32    0      
-112   32     
64     64     
-80    32     
160    96     
112    -96    
-96    80     
80     96     
-112   32     
0      80     
-48    0      
64     0      
-80    32     
48     -80    
-128   -16    
176    64     
-256   32     
32     32     
-928   -96    
112    16     
-272   -416   
128    48     
224    224    
-240   0      
96     16     
-16    -96    
16     192    
96     80     
224    240    
-240   48     
-80    -80    
304    -160   
-96    192    
-480   -64    
96     112    
-16    48     
-48    208    
176    336    
-256   0      
96     112    
32     80     
-48    144    
48     0      
48     128    
16     0      
0      -32    
-112   -64    
-16    -144   
-624   -160   
80     0      
176    -16    
192    192    
-96    48     
-16    -16    
-32    48     
-80    16     
256    304    
-240   272    
-32    96     
-64    32     
16     -112   
-48    48     
48     96     
-288   -64    
112    96     
-48    112    
-16    -48    
-80    64     
48     48     
-64    64     
128    32     
144    160    
-32    112    
16     16     
-176   0      
176    16     
-32    112    
64     32     
-144   16     
-48    32     
-64    -128   
288    -336   
112    32     
176    144    
-64    16     
-48    48     
384    176    
0      64     
32     0      
128    176    
32     -16    
128    0      
-96    64     
64     -32    
-112   16     
128    96     
-112   32     
368    160    
-208   128    
64     0      
-96    32     
144    80     
-48    -64    
-208   -208   
176    -496   
192    112    
96     128    
-176   32     
192    -32    
-32    -96    
160    -112   
144    112    
112    96     
-64    16     
32     48     
112    -16    
128    64     
-160   48     
64     80     
0      -144   
-128   -32    
192    112    
304    224    
-16    176    
-112   128    
144    32     
-240   16     
128    48     
-64    -32    
176    64     
-176   96     
416    400    
-288   448    
272    416    
-208   -48    
224    144    
-176   32     
-32    176    
-176   -224   
-192   -336   
192    208    
-112   112    
80     64     
80     128    
-64    176    
16     -144   
48     -16    
176    144    
48     464    
80     -128   
32     528    
128    -544   
-64    -256   
144    176    
144    32     
256    304    
-320   -96    
144    -48    
96     544    
128    -128   
-128   144    
80     144    
-48    0      
32     160    
-16    96     
128    288    
144    480    
112    224    
-400   -96    
272    16     
-112   304    
128    144    
0      48     
128    336    
-304   -80    
320    32     
32     144    
0      32     
48     48     
-64    -160   
304    112    
-144   48     
128    -224   
-16    48     
64     -288   
240    192    
-192   80     
64     96     
-256   -288   
144    -128   
64     112    
160    320    
-288   -432   
0      0      
-128   16     
-48    32     
112    32     
144    -288   
160    128    
-112   -2384  
160    -256   
0      -112   
176    -64    
80     0      
-16    32     
64     -176   
16     144    
128    16     
48     64     
-96    144    
-16    -32    
-48    80     
-80    -96    
-32    64     
32     -432   
192    336    
-256   112    
144    16     
-192   -384   
128    -192   
64     0      
-32    -112   
112    32     
0      224    
16     16     
-16    -144   
-32    96     
80     144    
192    304    
-160   -720   
-80    -272   
160    -560   
-160   80     
32     -16    
-16    128    
176    96     
-48    112    
48     16     
80     608    
32     80     
-112   -464   
-64    -144   
96     -48    
64     256    
80     128    
32     304    
128    -512   
-16    176    
-160   -112   
304    -640   
-256   -288   
-96    -112   
80     288    
-256   -224   
48     240    
0      -272   
336    256    
-128   96     
-96    -224   
176    -64    
0      192    
48     -128   
128    224    
176    -112   
48     272    
48     144    
208    -64    
80     0      
352    304    
-32    608    
-144   128    
-32    144    
32     -400   
-48    -96    
0      -224   
-48    144    
144    16     
-32    16     
80     -432   
160    240    
-432   -192   
288    0      
-144   80     
-64    -112   
16     -656   
240    -112   
64     -80    
-176   -368   
256    176    
64     96     
0      48     
16     -272   
128    -608   
-16    16     
32     -384   
128    192    
-16    -352   
64     -208   
688    272    
-784   0      
208    -416   
-64    -1552  
144    96     
144    224    
-368   32     
368    272    
-336   -288   
48     -64    
-64    -96    
32     -16    
96     96     
112    -64    
-64    -224   
192    -96    
160    -320   
-96    96     
112    -224   
32     -128   
160    -1376  
192    -80    
-288   -16    
208    -16    
176    -80    
64     32     
-64    -96    
144    192    
32     80     
-224   -64    
-704   -224   
224    -144   
64     224    
96     -48    
16     -112   
176    -272   
-112   -320   
192    -176   
32     -64    
336    -112   
32     176    
80     -176   
112    -96    
-160   -16    
176    -16    
-64    -16    
16     -144   
80     -16    
112    -144   
16     -16    
48     -368   
112    -48    
-32    -736   
32     176    
0      -128   
-112   48     
32     32     
160    -112   
-96    0      
-80    -48    
-176   128    
-64    -256   
-848   -128   
-32    -96    
112    48     
-16    -144   
-464   -224   
176    -896   
-176   -32    
160    -224   
-32    80     
-80    80     
32     96     
-48    -16    
0      -256   
-240   -64    
0      -48    
-144   -64    
64     112    
288    32     
-80    320    
320    -112   
-32    -480   
176    208    
80     176    
-16    48     
128    0      
224    -272   
-80    128    
96     -208   
-304   -32    
240    256    
-48    48     
0      -96    
-144   -80    
48     -320   
160    160    
-160   -96    
32     16     
-16    -544   
32     256    
-32    -32    
96     0      
-96    -16    
0      -16    
-96    0      
288    80     
-480   48     
0      -64    
-192   -80    
32     -176   
-48    48     
144    -192   
32     80     
112    -256   
96     -64    
-112   32     
48     64     
80     32     
-16    -16    
-160   -48    
256    0      
-64    16     
96     0      
32     -16    
-64    -160   
176    64     
-208   -128   
-32    64     
32     -48    
-160   128    
192    96     
-272   16     
64     48     
112    -16    
-368   -176   
336    -64    
176    128    
-192   -48    
48     112    
-16    -176   
160    48     
-528   -144   
96     128    
-128   -32    
96     -48    
64     0      
-272   32     
288    368    
96     112    
-128   -32    
16     -80    
64     48     
112    -64    
-96    48     
-176   -384   
-112   -16    
-176   -176   
128    240    
-256   48     
-80    -16    
32     -32    
-112   144    
16     64     
-432   -16    
-32    -128   
208    -208   
-96    -96    
-32    -32    
-144   80     
-64    -32    
192    304    
80     112    
-144   336    
-320   96     
48     -192   
-64    -32    
128    224    
-48    32     
320    368    
-64    832    
-608   304    
-128   64     
-112   -128   
-112   -96    
192    -208   
16     -32    
112    48     
-64    16     
160    144    
-240   -96    
-160   0      
64     32     
-208   64     
-80    16     
-160   64     
-816   -80    
-16    288    
-48    240    
-32    80     
-16    32     
-144   64     
-32    80     
144    -96    
-128   192    
64     112    
-144   -64    
0      -256   
-256   -336   
96     -272   
32     80     
0      -32    
112    80     
-464   -32    
-96    64     
-32    -112   
128    336    
160    -48    
-240   176    
-176   -64    
-96    -80    
48     240    
16     256    
-16    208    
-16    -208   
256    272    
-192   48     
496    272    
-544   96     
240    96     
-32    112    
192    -64    
80     96     
-32    -368   
-48    288    
-224   -208   
96     -80    
-224   80     
64     16     
0      32     
-80    64     
-336   -128   
64     112    
-128   -80    
208    144    
0      192    
-48    80     
-64    176    
-176   -192   
-48    -224   
544    528    
-336   -96    
80     -272   
304    64     
-288   192    
32     16     
48     0      
368    528    
-512   368    
160    -304   
-32    -288   
-48    128    
32     -32    
16     192    
-16    -80    
80     192    
64     240    
-80    -256   
464    672    
-400   560    
64     32     
48     -64    
64     240    
-144   -128   
-144   0      
176    160    
0      -16    
80     80     
-112   -32    
160    144    
0      16     
0      64     
-80    -48    
16     96     
192    112    
-80    480    
-112   112    
32     16     
-256   -448   
96     160    
48     256    
-16    112    
272    272    
-96    224    
16     144    
0      192    
-144   -464   
160    -384   
-48    144    
128    -336   
-48    -32    
16     -16    
80     80     
32     256    
32     128    
-80    224    
64     32     
-64    -48    
-16    32     
112    112    
-80    32     
-16    -128   
-48    128    
80     32     
-368   -320   
-64    -432   
112    -352   
-160   144    
304    448    
-288   368    
256    -1136  
-112   -112   
368    464    
-176   48     
128    112    
-32    16     
176    96     
-128   80     
176    -96    
-176   80     
16     256    
128    144    
-112   -176   
240    224    
-96    240    
-80    -64    
160    272    
240    416    
-112   -160   
16     176    
160    -176   
-16    80     
-48    48     
96     16     
80     -16    
64     112    
96     96     
0      176    
240    -208   
-144   -272   
-96    -224   
112    0      
0      224    
-32    96     
0      144    
-80    0      
288    160    
-96    32     
384    400    
-448   16     
192    -64    
96     112    
160    -256   
-96    144    
-144   -16    
144    -32    
48     -96    
256    208    
-336   -256   
-16    -48    
256    128    
-16    240    
16     304    
96     96     
80     32     
112    176    
-80    -64    
336    -368   
560    720    
-240   448    
-80    240    
80     176    
0      160    
96     112    
176    112    
32     128    
80     32     
64     32     
192    160    
-320   16     
32     0      
-32    96     
32     -160   
64     128    
-144   -368   
144    64     
176    256    
144    176    
96     512    
304    416    
-128   -128   
144    96     
336    16     
-112   80     
-48    80     
0      -96    
368    144    
432    -96    
-688   -16    
400    -160   
-144   208    
16     -1264  
64     224    
96     -32    
48     160    
-192   -48    
112    16     
-32    -64    
64     64     
32     176    
224    -192   
-112   64     
144    -288   
0      32     
320    -320   
176    112    
176    -432   
-48    -16    
176    80     
128    80     
-96    64     
64     128    
80     192    
96     240    
-192   192    
-176   -272   
160    -32    
160    -144   
224    112    
128    -336   
-112   80     
160    -240   
-144   16     
224    -128   
160    176    
144    80     
-16    -16    
224    144    
-176   -160   
192    192    
-192   -144   
160    112    
48     -80    
16     64     
240    -512   
-80    128    
-64    -496   
144    -96    
128    112    
112    96     
-80    32     
80     80     
-64    32     
32     -80    
144    112    
-144   -400   
176    64     
368    400    
-400   224    
240    -192   
-48    128    
208    -96    
0      80     
-48    -208   
64     400    
-32    48     
32     -1088  
128    -1104  
16     128    
32     48     
-16    -80    
64     -576   
208    48     
176    144    
-160   -208   
240    320    
160    -48    
-272   192    
112    64     
160    -848   
80     16     
64     16     
64     -512   
-80    0      
224    -608   
0      -96    
-16    -704   
288    -208   
64     -64    
16     16     
32     144    
176    -144   
48     -640   
-32    -48    
80     -144   
-32    64     
-192   -96    
-96    -336   
304    -96    
112    -64    
-64    -80    
208    -48    
80     32     
128    -1056  
-16    -176   
208    -256   
-160   -48    
128    -80    
32     128    
128    -48    
32     64     
-48    -48    
176    -160   
-592   0      
64     -112   
112    -16    
48     -96    
80     -160   
80     -688   
112    -96    
-80    64     
80     128    
272    64     
-32    0      
-32    -352   
160    -384   
-128   -128   
160    112    
-368   -128   
16     112    
336    320    
96     -96    
-48    -416   
224    -192   
16     288    
16     -624   
288    -112   
-32    128    
176    304    
96     48     
16     96     
-48    -16    
0      -48    
-48    -80    
-128   -144   
-496   -160   
-144   16     
-128   -96    
-80    -224   
96     272    
16     -256   
-112   -96    
0      -400   
112    -64    
-96    64     
192    -144   
32     -464   
32     -288   
48     -944   
-32    -320   
-112   -176   
176    80     
-176   352    
80     -64    
0      16     
-80    -352   
192    0      
176    112    
112    288    
-48    144    
0      -96    
-32    192    
112    0      
-464   -496   
-80    -304   
160    240    
-64    -384   
-768   -592   
128    -128   
32     240    
80     -336   
-112   -32    
224    -240   
-16    -192   
0      -192   
160    80     
-208   -160   
352    448    
-336   -32    
80     64     
-368   32     
48     -96    
160    -32    
16     144    
176    0      
80     432    
256    160    
96     -320   
32     -176   
-64    -16    
320    -80    
-32    192    
112    144    
-96    -144   
160    -176   
128    160    
-16    64     
192    400    
-176   -336   
304    -96    
-1120  -16    
-112   -192   
16     -96    
256    272    
-64    16     
32     288    
-48    240    
-176   -320   
32     32     
48     368    
-64    -272   
112    96     
-208   -144   
-1216  -448   
320    304    
-1088  -224   
-16    32     
80     48     
0      64     
0      32     
-160   -96    
-16    -240   
-976   -48    
-48    464    
64     48     
-240   80     
320    112    
-112   272    
-224   -16    
-80    -416   
-80    16     
48     272    
-32    -144   
-96    -80    
-48    -368   
-464   -144   
192    400    
-368   224    
0      -48    
-16    -128   
16     16     
-64    128    
272    352    
-144   -192   
80     288    
-224   -256   
384    96     
-256   832    
0      -80    
80     32     
-160   16     
-128   64     
-416   16     
416    80     
-1696  -192   
-128   -64    
-80    -80    
144    96     
-64    -112   
112    96     
-16    64     
128    96     
-144   128    
-32    64     
-32    112    
-16    -416   
-16    -80    
208    1152   
-160   160    
-448   -880   
480    368    
-320   576    
96     -320   
32     272    
32     -96    
32     -112   
-144   -336   
176    288    
-64    32     
64     -128   
-112   192    
112    -224   
-256   0      
272    48     
-352   128    
-32    128    
-1008  -48    
-32    192    
-64    -64    
-80    48     
-80    208    
64     0      
-256   -480   
-32    464    
-64    128    
-176   -48    
0      -320   
48     64     
-96    208    
64     192    
-96    -208   
-304   48     
96     384    
-208   -112   
224    336    
304    512    
-32    624    
0      176    
-48    -48    
-16    -32    
32     -64    
-224   -208   
112    112    
-256   608    
-16    240    
-64    160    
-224   -112   
-48    32     
160    32     
-32    -80    
16     -48    
-144   0      
112    96     
-64    48     
96     336    
128    80     
-112   0      
112    -64    
32     80     
-112   -48    
16     48     
-80    -64    
-64    -96    
128    48     
-32    96     
208    160    
-288   -112   
128    128    
128    48     
-32    48     
0      0      
144    336    
-320   64     
-96    96     
48     64     
-112   192    
192    -144   
-240   224    
304    48     
-80    96     
16     48     
80     16     
16     -32    
-48    -176   
160    80     
288    384    
-416   272    
176    256    
-144   -32    
32     0      
128    16     
64     -128   
-32    128    
-96    160    
-112   -32    
-64    32     
-96    160    
-64    336    
48     112    
-112   112    
48     80     
0      16     
-176   -80    
448    128    
-336   -80    
0      64     
48     -32    
-208   -128   
64     64     
-128   -80    
-64    112    
-80    80     
-112   240    
-96    80     
-160   48     
-112   96     
-144   16     
-112   16     
16     112    
32     112    
48     160    
64     224    
272    352    
16     112    
-96    160    
240    288    
-48    256    
-224   112    
-112   64     
272    -16    
-112   -32    
64     64     
-208   16     
240    96     
0      32     
288    -16    
-80    80     
32     48     
192    64     
16     -32    
144    48     
32     64     
336    160    
-128   0      
400    432    
-320   32     
112    80     
-112   80     
256    112    
144    128    
-208   -1328  
32     96     
80     80     
-176   -128   
288    80     
144    96     
-96    0      
64     128    
16     0      
32     -16    
-112   16     
208    96     
80     96     
-96    80     
-64    48     
96     -1568  
-64    16     
96     144    
-32    64     
80     112    
144    48     
-112   80     
64     96     
-16    80     
-160   -448   
288    0      
16     192    
32     -48    
-128   -128   
128    32     
64     -112   
-16    16     
208    -416   
-32    96     
32     -48    
-48    -144   
224    112    
16     160    
16     -192   
-48    32     
80     96     
-48    144    
112    16     
-80    -320   
48     -64    
64     -96    
-80    144    
16     -1360  
112    240    
-16    96     
-160   112    
80     240    
272    208    
-80    -256   
144    192    
-96    0      
64     176    
-64    32     
96     -32    
144    224    
-160   -224   
16     -160   
160    -736   
128    -16    
32     -432   
288    304    
-112   -96    
-240   -240   
256    -512   
64     96     
-96    -224   
48     -48    
32     -64    
-48    -32    
176    128    
32     -240   
48     0      
16     -272   
48     144    
96     -144   
-80    16     
272    -208   
16     96     
-16    -32    
-96    -240   
240    384    
64     176    
64     96     
32     -224   
128    64     
-32    -64    
288    192    
-160   112    
112    16     
32     -320   
-208   -576   
192    256    
-144   160    
-16    -352   
272    944    
-144   352    
-112   -976   
176    400    
-352   -1120  
176    400    
-64    -208   
64     144    
64     -96    
80     176    
-176   -2656  
176    -80    
144    480    
-96    112    
48     -384   
192    160    
32     416    
96     -208   
16     176    
96     -16    
128    496    
32     -208   
-128   -64    
80     272    
-224   -176   
-112   80     
-32    -224   
16     0      
-32    -576   
96     -96    
80     -1008  
80     -288   
288    128    
-144   -448   
240    48     
144    -976   
192    -208   
-32    192    
400    -160   
-64    80     
-192   -336   
352    -1088  
368    560    
-128   -448   
-32    -160   
-400   -336   
208    176    
272    864    
-80    -192   
0      -368   
16     -512   
336    96     
-80    -144   
48     -48    
112    96     
-32    -48    
368    -304   
-368   32     
-16    0      
-32    240    
-144   -48    
128    352    
-128   128    
-240   -176   
-64    -736   
320    -16    
-112   208    
112    -432   
0      -128   
80     -240   
32     208    
96     -288   
64     416    
-176   -560   
400    -848   
-384   608    
-80    -240   
-960   -144   
16     512    
-16    16     
-48    -288   
-48    -128   
-96    -768   
-48    -576   
-16    288    
16     320    
208    -160   
-176   48     
16     -48    
112    112    
-384   -112   
64     160    
-176   -320   
80     112    
32     -80    
96     -128   
-80    -80    
128    128    
-16    112    
-96    -656   
512    240    
-112   224    
-240   -480   
-384   -1344  
400    704    
0      592    
-64    -544   
96     560    
-112   -464   
-464   192    
352    -224   
-464   -560   
400    336    
-48    384    
160    -480   
-80    112    
176    -368   
96     272    
-240   -48    
208    96     
-320   -336   
336    64     
-416   336    
96     -48    
-576   208    
80     -336   
-976   128    
128    -80    
80     -64    
-80    32     
0      80     
464    -832   
-80    16     
-32    -16    
112    80     
-16    0      
-16    -16    
-64    -32    
64     32     
-400   -288   
304    384    
-288   368    
144    192    
-128   192    
-64    -592   
192    528    
192    304    
-64    64     
-336   432    
96     48     
-128   -128   
64     144    
96     640    
64     32     
-256   16     
288    -64    
-432   64     
80     -192   
48     128    
32     64     
0      192    
-176   80     
96     -112   
-32    -112   
192    -16    
-96    32     
-112   -80    
16     -48    
-80    -208   
-112   32     
32     0      
-576   -144   
224    0      
96     -96    
-1008  -208   
128    16     
-272   32     
304    -176   
-96    -80    
-208   -16    
-160   -48    
112    32     
-80    -16    
48     16     
0      256    
-640   80     
-176   32     
48     16     
-144   48     
-112   -112   
-512   -208   
464    112    
-736   96     
128    32     
-368   -160   
-208   48     
-1168  -64    
-272   -112   
304    -256   
-16    0      
0      32     
16     224    
-144   -176   
0      32     
-80    -160   
96     64     
16     144    
-224   64     
-144   96     
32     80     
-144   16     
-208   80     
64     240    
-272   32     
224    112    
-368   -240   
160    128    
48     -128   
32     48     
304    336    
-192   192    
-192   128    
-16    160    
-80    112    
32     32     
-80    80     
80     128    
-32    -48    
-144   -48    
208    208    
-432   -112   
144    128    
-352   64     
-96    32     
144    80     
-16    -352   
0      -304   
-368   -224   
272    96     
-48    -176   
-16    -112   
176    -176   
176    256    
-400   144    
80     144    
400    -64    
336    192    
32     -128   
-16    160    
64     -16    
-48    -208   
-208   -352   
80     288    
-112   224    
-96    224    
-48    272    
-48    -32    
64     80     
-384   -96    
80     96     
-672   -48    
224    80     
48     -112   
-352   -160   
-352   0      
144    -64    
0      48     
128    48     
-192   16     
128    128    
-96    64     
-112   80     
112    96     
-144   -160   
192    32     
-608   32     
80     96     
64     64     
-128   -16    
336    176    
-64    32     
0      -16    
-64    32     
128    32     
-112   -16    
80     96     
48     16     
-16    48     
-272   -192   
224    -48    
-384   -80    
160    160    
368    192    
-464   144    
48     -16    
-176   96     
96     -16    
-96    48     
-80    48     
80     32     
-144   -48    
-80    -80    
128    48     
-128   -48    
80     112    
-304   48     
48     112    
-64    64     
48     96     
80     96     
112    64     
-144   16     
32     48     
48     64     
16     64     
0      64     
-208   -64    
96     96     
0      48     
-16    -16    
48     48     
-16    64     
-16    64     
0      -80    
-96    0      
192    64     
-192   32     
208    144    
-176   272    
-64    128    
256    144    
-368   0      
256    32     
-208   64     
240    64     
-320   -144   
48     -368   
0      48     
192    304    
-320   16     
208    -16    
-128   -144   
-336   -560   
-112   -384   
-80    -272   
-48    -48    
16     -32    
16     192    
-192   48     
16     -224   
-112   -64    
64     -144   
16     -16    
240    432    
-80    -64    
16     64     
64     96     
16     256    
-48    -112   
160    -64    
160    416    
-160   -64    
16     224    
240    304    
-464   -448   
464    288    
-160   272    
176    -544   
-224   160    
208    -112   
-32    -64    
208    400    
64     128    
112    -48    
48     160    
96     -64    
-64    -128   
256    192    
-80    -48    
0      48     
192    96     
80     176    
-48    224    
48     0      
112    -48    
64     112    
32     64     
16     80     
64     64     
-48    0      
160    320    
-96    80     
-176   -416   
32     -144   
112    -528   
128    80     
112    176    
16     160    
144    336    
160    320    
80     176    
16     -176   
16     128    
112    112    
96     96     
144    160    
32     16     
80     112    
416    272    
-96    -304   
448    272    
-272   272    
128    208    
144    400    
0      80     
-96    -128   
96     192    
64     176    
-80    128    
48     -96    
320    -64    
-240   128    
224    -144   
32     176    
16     112    
-128   320    
96     -432   
-112   288    
128    400    
-256   208    
128    -64    
16     496    
128    96     
-48    -112   
-336   16     
384    -192   
-144   -320   
-80    144    
496    384    
-48    -64    
-32    -432   
16     -2448  
208    112    
-32    -128   
48     480    
208    352    
16     288    
-96    -160   
112    432    
-128   432    
32     64     
-48    224    
-96    -272   
-144   352    
48     -96    
-64    32     
-176   -672   
304    16     
0      480    
-80    240    
80     -512   
-144   -704   
48     32     
32     416    
-112   -144   
-16    256    
272    128    
-176   288    
176    64     
-176   -48    
688    400    
-80    992    
-320   -496   
128    -1136  
192    352    
16     48     
0      -384   
32     -32    
80     96     
48     96     
48     -352   
-128   -208   
176    -416   
224    528    
128    192    
-64    -528   
-16    -304   
320    736    
-192   384    
-32    -208   
0      -112   
80     80     
0      112    
64     80     
-64    -32    
48     -656   
112    16     
384    -16    
-240   -416   
224    -48    
272    176    
-352   -752   
208    -368   
224    192    
176    304    
32     -16    
112    -96    
48     -224   
224    -32    
32     160    
144    -112   
96     96     
224    144    
-144   -176   
240    -144   
-112   -80    
176    -384   
-128   -96    
16     -464   
208    -64    
-160   -96    
288    -624   
-256   144    
-1376  -144   
80     -576   
192    -16    
-80    -112   
-48    16     
96     -768   
-16    -256   
48     0      
224    -352   
160    176    
-16    -32    
80     -688   
304    160    
-96    -368   
80     160    
-528   0      
0      -288   
224    -112   
-48    -608   
208    -64    
0      -560   
240    32     
-80    -224   
192    192    
-16    80     
32     128    
208    0      
112    16     
-96    -128   
336    160    
-176   16     
80     -112   
0      -80    
128    -176   
96     16     
-96    -240   
-32    -64    
432    -128   
-144   32     
-128   -16    
-144   112    
80     -96    
0      96     
32     48     
32     -16    
176    176    
-80    96     
-960   0      
-48    0      
208    80     
-80    -16    
-16    0      
80     -720   
0      -112   
-32    -304   
64     272    
32     -48    
64     -64    
144    -144   
0      -16    
-112   16     
0      -96    
-224   0      
144    64     
-224   64     
80     -208   
-64    -160   
-32    -288   
16     -64    
-32    -960   
112    48     
-64    -16    
192    288    
-192   64     
-112   -128   
-320   -64    
208    16     
-96    16     
240    -16    
-544   32     
96     0      
-32    0      
-64    -112   
128    192    
48     -688   
-80    -48    
208    -208   
-64    32     
112    112    
64     112    
16     -80    
112    -96    
48     -32    
-112   -272   
-560   -304   
224    80     
80     112    
32     -32    
64     128    
176    -384   
64     96     
144    -384   
80     0      
192    176    
-176   -32    
-96    224    
-32    -128   
384    512    
-352   96     
144    96     
-80    64     
240    32     
-192   -432   
-16    -144   
224    -256   
96     64     
-144   -176   
80     -64    
64     240    
-160   16     
-240   -48    
144    -32    
-144   16     
-64    -240   
-96    16     
240    -144   
48     -160   
304    -16    
-16    64     
128    -96    
128    112    
-32    -16    
-80    96     
16     -16    
32     -80    
96     64     
16     -64    
16     96     
112    -48    
16     32     
112    -96    
-112   80     
-80    -64    
192    128    
-368   -112   
16     48     
-48    64     
176    -32    
-64    -64    
-112   112    
208    96     
32     32     
-208   -64    
400    -64    
-128   32     
64     -80    
32     64     
-16    -32    
-48    64     
-160   -64    
-400   -160   
32     16     
32     48     
-192   32     
48     96     
-288   -48    
-1552  -192   
112    96     
144    16     
-32    32     
-192   -48    
0      -64    
-16    -320   
-48    -32    
64     0      
0      48     
16     48     
0      80     
128    160    
-288   -48    
-48    -240   
-160   96     
208    96     
112    -16    
80     96     
-160   -112   
192    64     
-288   -112   
128    96     
0      96     
-16    32     
-32    0      
-176   -64    
-16    48     
-208   -48    
256    832    
80     464    
-512   -848   
-656   -64    
224    704    
-320   -304   
208    208    
-144   -32    
48     32     
-32    48     
-16    0      
-16    16     
-144   16     
0      16     
-16    48     
-32    80     
-176   32     
-176   -192   
-112   -928   
32     496    
-288   -448   
272    272    
0      -208   
32     176    
96     160    
-64    -48    
-80    144    
-64    -208   
96     176    
-48    192    
-144   -16    
400    208    
-544   -448   
-16    -96    
-16    416    
-640   16     
32     0      
16     -192   
-16    160    
0      80     
80     64     
-80    -224   
112    80     
32     448    
48     96     
-64    176    
0      320    
128    112    
-352   -208   
240    -304   
-368   -112   
112    -112   
-32    32     
240    368    
240    368    
-160   64     
96     -16    
-144   16     
-16    16     
-112   80     
192    48     
-336   16     
144    48     
-304   -48    
176    64     
-448   -80    
176    64     
32     80     
16     48     
144    96     
-384   -320   
16     48     
-240   64     
144    -160   
48     128    
96     80     
-144   96     
320    80     
-80    384    
368    640    
-128   272    
-128   192    
160    -32    
-224   -48    
-128   -224   
64     -96    
-32    -16    
288    -144   
-80    112    
128    -64    
128    272    
-96    16     
96     32     
224    -48    
-112   176    
-32    32     
-80    -128   
80     48     
-240   96     
112    -32    
192    544    
-16    512    
-64    -304   
-16    80     
-48    -16    
64     64     
16     96     
-32    64     
-208   -208   
448    -96    
-352   -96    
288    -32    
-144   224    
0      64     
112    176    
48     176    
-176   224    
-320   -528   
432    224    
144    480    
112    736    
-208   -192   
272    576    
-144   -80    
-64    -144   
0      64     
-32    -64    
-288   592    
416    -320   
-224   -112   
48     -128   
-144   80     
32     -448   
64     -400   
-112   -144   
192    544    
176    176    
-256   -80    
-16    -672   
80     -512   
16     -448   
224    -304   
16     16     
144    48     
32     224    
160    64     
128    48     
-240   -48    
112    48     
-112   80     
-16    416    
-160   384    
32     384    
-96    160    
-32    -64    
176    240    
-176   176    
-176   48     
336    80     
80     112    
-48    -80    
80     -48    
192    -224   
16     80     
176    -16    
-48    -64    
64     32     
272    128    
32     80     
240    -608   
256    400    
-384   112    
64     32     
16     32     
144    192    
-80    -112   
-176   -144   
48     -320   
-64    32     
-32    -496   
272    -128   
32     192    
256    -80    
-128   16     
128    -880   
0      0      
64     80     
176    240    
-80    112    
-80    -32    
64     -80    
96     80     
112    -48    
-48    0      
96     96     
64     144    
-16    48     
-16    -336   
-48    64     
128    -160   
-64    -80    
160    32     
-80    224    
224    64     
-16    16     
32     80     
80     64     
-160   -208   
176    32     
48     128    
-240   128    
384    -16    
-48    48     
288    0      
-16    -128   
32     16     
48     -400   
-32    -16    
-16    -32    
48     112    
32     80     
-80    80     
96     64     
208    240    
-96    160    
32     256    
128    160    
80     -48    
80     64     
64     -192   
-96    -80    
144    -304   
96     112    
-96    -304   
96     128    
80     80     
240    240    
-288   112    
48     112    
-128   -48    
160    -16    
48     48     
-16    -112   
16     64     
-32    -160   
160    112    
-16    -400   
176    192    
-144   48     
0      64     
160    16     
-32    -64    
64     48     
80     96     
-128   80     
208    48     
48     128    
80     -96    
-32    64     
32     -480   
-160   -48    
352    64     
-304   192    
160    32     
-160   128    
96     0      
16     96     
96     64     
-32    112    
16     144    
240    -192   
0      192    
48     -96    
-64    144    
32     -192   
-32    64     
64     -288   
16     112    
0      -1008  
144    144    
176    48     
64     80     
80     128    
-96    -1456  
64     -944   
16     48     
208    112    
-96    -176   
112    160    
16     -112   
16     128    
-48    -64    
96     112    
-48    -256   
48     240    
-16    -256   
-128   -816   
112    192    
-1040  -144   
32     -368   
64     144    
304    -496   
-64    48     
160    -336   
-16    -80    
32     16     
144    -64    
112    128    
-192   -48    
432    -96    
-304   160    
112    -192   
-48    32     
-64    16     
192    -304   
-224   -96    
48     -304   
224    -112   
-112   -1488  
160    -48    
-112   400    
144    -64    
16     176    
64     16     
-80    -272   
-16    -48    
64     -64    
240    208    
-448   -64    
48     -96    
0      -64    
32     -32    
112    -96    
16     -160   
64     112    
80     -432   
64     -112   
224    -160   
-16    48     
256    -240   
-208   192    
160    32     
-256   -80    
64     -176   
208    -96    
-1040  -160   
80     -224   
80     -80    
48     -176   
64     16     
160    -464   
-96    240    
-112   -16    
128    192    
192    0      
208    208    
-144   -32    
-48    -128   
-64    16     
16     -16    
-320   0      
96     -80    
64     -80    
192    -128   
64     -128   
-64    -576   
-192   0      
-48    -48    
48     0      
208    -32    
0      -16    
-144   -16    
80     -144   
64     0      
-16    0      
48     -48    
96     -80    
-416   -96    
-176   -192   
-16    -96    
-160   -512   
144    448    
-48    -208   
-160   -80    
16     -32    
-96    16     
-64    -192   
0      16     
336    -64    
-48    64     
-112   -128   
-32    -32    
48     -64    
-48    -96    
-144   64     
-144   -160   
16     304    
-16    -816   
48     496    
192    -848   
-48    -512   
-16    -32    
-112   352    
592    -16    
-416   -176   
64     64     
0      -64    
-112   16     
64     -64    
80     32     
16     -240   
32     112    
48     -256   
128    64     
-224   48     
272    -128   
-160   -64    
-16    -144   
-304   32     
32     16     
-48    -32    
-16    144    
-96    -16    
-160   -320   
16     -320   
160    -32    
32     160    
160    -128   
64     192    
-32    112    
112    48     
64     -112   
16     -48    
16     0      
0      -48    
96     80     
-32    -48    
-272   16     
-192   -304   
-64    -48    
-512   -16    
64     80     
-160   -144   
-336   -32    
16     -16    
-992   96     
-16    144    
-208   432    
256    512    
-112   272    
-144   592    
160    288    
-400   -192   
-128   -32    
-64    64     
-160   -112   
112    112    
304    16     
-576   320    
48     -32    
96     112    
16     -32    
-64    48     
-192   48     
-128   32     
-176   0      
-16    -368   
48     -208   
-368   -80    
240    -112   
-48    -144   
112    32     
0      -160   
-32    0      
96     80     
16     48     
-160   112    
-32    320    
-416   -352   
-368   -512   
224    272    
-304   240    
-16    64     
-112   -656   
-112   -336   
304    128    
-304   -176   
384    -352   
-128   -32    
384    320    
0      -16    
64     64     
-272   -160   
48     224    
-128   -256   
128    448    
-704   16     
-128   -16    
-240   -208   
128    -1008  
48     160    
112    400    
-16    -176   
64     96     
176    352    
-352   -64    
-32    -448   
64     -176   
64     128    
32     208    
-80    96     
-176   64     
144    176    
-208   -32    
-64    160    
128    -112   
-256   -208   
176    -384   
-176   -208   
192    -112   
-32    48     
128    144    
-304   -112   
32     64     
-240   -160   
-144   96     
-272   0      
-96    48     
-1264  240    
-208   208    
-64    16     
-48    -16    
-176   -64    
16     -64    
128    176    
-224   -32    
-80    16     
64     -96    
-176   256    
-176   80     
-160   64     
112    -16    
32     160    
-224   16     
-64    128    
-64    -32    
-16    -16    
-160   -224   
96     -48    
0      64     
208    -96    
-176   112    
96     -32    
64     240    
-16    16     
16     16     
-144   -112   
160    128    
-480   -96    
0      96     
-16    -32    
112    -80    
32     64     
48     80     
176    32     
-112   32     
-80    32     
272    48     
-208   64     
-48    0      
48     176    
-192   -64    
-112   16     
112    112    
336    272    
-160   -16    
-48    -16    
-160   -48    
0      -48    
64     80     
-32    48     
80     112    
64     48     
16     96     
-256   -128   
192    -48    
-128   144    
176    64     
-64    64     
48     112    
64     -16    
-48    16     
96     96     
64     64     
192    192    
-176   128    
144    128    
80     240    
-336   160    
64     -32    
96     224    
-48    64     
32     48     
-96    -16    
-48    0      
464    480    
-656   112    
304    96     
-48    16     
144    112    
-64    32     
32     112    
0      112    
96     128    
-144   32     
224    96     
-272   0      
112    64     
-176   160    
112    -80    
96     80     
-16    80     
192    208    
-288   -32    
144    96     
48     144    
-80    -208   
-112   -32    
144    96     
-336   48     
96     16     
-112   -48    
112    112    
-32    288    
144    80     
80     64     
64     192    
-64    32     
-64    80     
48     64     
-144   -80    
32     -32    
0      16     
144    48     
-464   -144   
512    0      
320    496    
-320   96     
32     128    
96     112    
80     112    
32     16     
-64    64     
32     -16    
16     -128   
320    160    
-160   48     
-64    16     
48     16     
-160   64     
272    -272   
-48    224    
-32    -1072  
-96    112    
144    96     
-16    32     
-32    144    
-160   128    
208    16     
-32    128    
112    48     
-208   112    
80     176    
48     0      
80     64     
288    272    
-416   240    
48     -1232  
0      32     
208    128    
48     48     
-80    -32    
240    208    
112    128    
80     96     
0      -128   
336    288    
-224   80     
192    112    
-48    48     
208    -96    
0      96     
-80    -336   
192    80     
48     128    
16     -16    
-16    32     
80     80     
-32    -160   
80     48     
-16    -48    
64     48     
96     96     
80     80     
192    96     
-16    -128   
720    640    
-320   592    
-80    224    
-64    -1344  
144    48     
320    288    
-240   288    
-144   -64    
-128   80     
336    48     
16     160    
160    16     
-272   -192   
416    80     
304    -48    
-96    32     
-32    -208   
208    208    
80     -416   
112    -16    
160    -352   
96     208    
-48    128    
16     80     
112    32     
160    256    
-64    96     
-80    80     
160    48     
224    112    
-288   -368   
-16    -480   
48     0      
-80    -352   
32     96     
-64    -128   
80     -48    
-16    -176   
144    -64    
-80    -64    
112    144    
-176   224    
0      112    
192    224    
-16    -352   
128    -32    
-128   -224   
160    112    
48     -80    
-128   64     
112    -304   
0      128    
-48    48     
-32    -64    
-96    -208   
192    240    
320    192    
-192   -368   
336    896    
-32    176    
32     -176   
-64    -192   
80     80     
-16    80     
304    272    
-288   -720   
272    352    
-288   48     
288    -64    
-320   -240   
32     224    
-64    -1968  
-16    -528   
64     -240   
80     96     
-112   -160   
368    32     
-16    464    
64     -240   
336    -32    
-176   144    
160    -96    
0      -128   
112    -96    
-176   -80    
-1440  -400   
-64    -608   
208    -176   
64     -144   
-208   -160   
-32    -1088  
0      -256   
-32    -32    
64     -144   
-16    -176   
48     112    
80     -16    
-208   0      
224    -112   
-80    -224   
-528   -16    
112    -176   
-16    -16    
32     16     
112    -16    
96     -112   
128    48     
48     592    
112    112    
304    -32    
-48    16     
304    -192   
-176   192    
48     64     
48     -16    
-304   -336   
144    -432   
64     -144   
160    16     
-128   -160   
144    -16    
112    32     
-80    -112   
48     16     
224    -48    
-144   64     
80     -32    
16     80     
-64    240    
48     -64    
-224   -112   
96     -112   
-464   -272   
192    -176   
-112   -48    
176    -176   
-48    128    
80     -160   
-240   -16    
-256   -128   
224    256    
160    112    
144    560    
-96    112    
48     -80    
-176   0      
128    -112   
-96    -32    
400    336    
-336   304    
-32    -96    
112    -160   
32     -304   
128    -16    
32     -768   
176    80     
-32    -16    
0      -432   
160    432    
-16    528    
-432   -1008  
32     -752   
224    496    
-208   64     
-736   -656   
160    416    
-96    -480   
160    -512   
176    800    
-32    -224   
64     80     
32     -160   
48     -112   
-16    -448   
96     -48    
-48    128    
32     -96    
-336   -48    
80     -240   
-224   -16    
160    64     
144    192    
-16    -80    
112    48     
112    -208   
112    640    
16     352    
-48    -64    
64     0      
-160   144    
352    96     
32     64     
-160   16     
-48    -16    
32     64     
336    112    
-144   128    
240    -224   
-640   16     
560    -304   
-176   32     
80     48     
-64    32     
144    0      
112    16     
-112   112    
224    80     
-80    16     
368    480    
112    -80    
160    -64    
-176   112    
-80    -304   
112    64     
-176   -112   
-992   -80    
160    192    
-1840  -176   
80     96     
224    16     
-48    80     
144    80     
-144   16     
-48    -112   
64     32     
-1184  -192   
-128   176    
-240   -256   
384    384    
-256   -176   
-288   -112   
-16    -32    
-320   -16    
-192   -16    
-320   -48    
240    64     
16     144    
-144   -80    
48     0      
-256   -208   
-32    -96    
128    144    
-224   -64    
-48    64     
-208   80     
-192   -128   
-128   128    
-496   -160   
16     112    
-544   32     
0      32     
-480   -32    
-32    96     
16     -48    
32     16     
-64    -32    
224    224    
-128   -112   
16     160    
-48    -16    
-64    64     
64     16     
-112   0      
144    96     
-448   -96    
96     112    
-352   80     
0      16     
-32    -80    
64     112    
-112   -128   
112    96     
-144   -160   
16     32     
48     -16    
-224   -48    
208    176    
64     96     
-112   0      
-64    -16    
96     0      
-96    48     
176    80     
-608   -48    
128    80     
-112   -48    
96     144    
-160   -128   
112    256    
128    16     
-128   0      
-16    32     
-64    0      
-16    64     
96     48     
-64    -32    
-64    48     
-176   48     
80     -16    
-144   -48    
176    48     
96     64     
-48    0      
272    368    
320    336    
-608   0      
240    96     
-48    0      
-144   -16    
-80    48     
80     48     
-144   -64    
-160   -16    
-144   16     
0      -16    
-1728  -64    
192    -48    
-48    80     
-32    -32    
-32    192    
192    48     
-16    32     
32     -32    
80     96     
64     368    
16     96     
-144   -16    
96     112    
48     160    
-112   96     
-304   48     
-160   32     
-80    -32    
-96    32     
96     48     
16     80     
-32    64     
-48    -288   
80     144    
-192   -80    
-256   128    
64     16     
-80    128    
-32    96     
-48    144    
-464   -32    
80     32     
64     -16    
-32    0      
-48    64     
96     32     
-208   -128   
0      -80    
128    64     
-96    64     
224    160    
-272   -96    
0      192    
-224   -32    
0      96     
96     64     
144    160    
-128   48     
144    96     
-224   16     
64     64     
96     256    
208    192    
-128   48     
-80    -32    
240    80     
-96    -32    
48     112    
-96    96     
64     -48    
-96    64     
224    128    
-128   16     
272    240    
-288   192    
-128   -576   
-96    0      
240    96     
-64    -368   
-160   -320   
64     16     
16     176    
16     368    
-176   0      
80     0      
144    96     
-16    0      
-64    32     
-128   -96    
144    0      
128    144    
-128   32     
432    608    
-432   336    
-128   -160   
-64    144    
-96    96     
-144   -144   
-160   -144   
48     -80    
0      -16    
128    336    
176    160    
368    608    
-304   432    
96     368    
-192   144    
-240   -80    
96     0      
-96    80     
0      368    
-96    96     
-16    112    
-80    64     
-16    48     
0      128    
96     48     
-144   -32    
128    -80    
-16    176    
240    0      
112    160    
-32    128    
-32    96     
-48    16     
-128   0      
96     -96    
48     400    
80     -368   
16     176    
176    880    
-256   -416   
-48    -272   
256    592    
-192   16     
112    -64    
0      208    
288    112    
32     128    
-128   -272   
-16    224    
160    64     
-80    -464   
80     224    
-48    -800   
96     -16    
0      288    
80     336    
-16    -112   
96     64     
-16    80     
176    64     
-224   80     
272    128    
-96    -16    
0      64     
176    64     
0      -96    
48     256    
-96    -224   
416    352    
-112   400    
-112   -384   
0      -272   
-48    96     
48     64     
-48    112    
128    176    
32     656    
-224   192    
32     112    
32     288    
160    -608   
112    224    
-80    -560   
-128   -240   
112    -704   
-96    16     
32     -144   
64     -32    
48     -336   
96     336    
144    352    
-32    144    
-144   -192   
-16    -400   
-144   96     
112    -240   
16     80     
48     -464   
64     112    
16     -704   
64     96     
32     -208   
0      64     
0      48     
0      64     
320    80     
-240   112    
256    -32    
-96    272    
-32    -192   
-64    -480   
176    16     
32     0      
128    128    
176    -96    
160    608    
-176   496    
0      160    
-48    -176   
16     432    
112    96     
-112   -16    
32     -96    
48     -80    
0      80     
0      -320   
64     -16    
-144   -464   
192    -112   
176    -64    
-144   -112   
128    16     
32     240    
-64    -48    
64     240    
-96    -336   
-64    -384   
224    -352   
64     480    
528    1232   
-112   -928   
48     -16    
-48    -96    
240    -48    
-96    -80    
208    -16    
-48    -48    
176    208    
176    768    
-144   -368   
96     112    
-80    -32    
-16    48     
32     -352   
-32    -80    
48     -160   
160    128    
-48    -224   
96     208    
48     112    
96     32     
240    -528   
-48    -64    
-32    -384   
64     -816   
144    32     
16     -32    
336    -768   
288    64     
-32    256    
112    80     
144    144    
-16    -48    
48     128    
-144   -352   
48     96     
-112   -192   
-16    -560   
448    384    
-160   -592   
176    -160   
-16    128    
192    -96    
-176   -128   
144    16     
32     16     
48     272    
-96    -272   
224    -32    
208    48     
-192   -416   
16     -128   
-16    -368   
192    96     
32     -64    
-80    -352   
-912   -80    
112    -80    
-144   -272   
240    -416   
-32    -32    
240    -64    
-16    0      
16     -32    
48     -64    
16     -80    
-160   -16    
-32    -64    
16     144    
-144   96     
64     144    
-208   160    
64     0      
48     -112   
80     -288   
-80    -352   
144    -848   
16     -208   
0      -1168  
128    16     
96     -80    
16     -48    
64     0      
80     64     
-112   48     
272    -64    
-496   -96    
464    112    
-16    352    
-416   512    
0      416    
256    208    
-96    144    
224    -272   
0      -160   
-80    -800   
32     -80    
160    48     
64     96     
32     112    
224    -144   
-224   -80    
176    -336   
-160   -16    
192    -144   
-176   32     
272    48     
48     80     
-16    0      
-96    112    
-80    96     
208    64     
-16    80     
192    -112   
-160   -144   
128    -32    
64     32     
192    160    
-368   32     
176    -64    
-320   0      
240    -256   
-192   -96    
160    -352   
144    80     
-96    -304   
32     80     
-96    128    
128    192    
-224   -16    
32     48     
-240   32     
-32    112    
-176   -64    
-16    -240   
-304   0      
-240   -48    
32     -208   
64     -32    
144    96     
128    -176   
-112   112    
80     -16    
-32    -48    
-112   160    
128    -64    
-256   0      
176    112    
-80    -176   
-48    -288   
112    176    
192    16     
-96    64     
0      -176   
224    80     
96     -256   
304    144    
-448   112    
-48    -160   
-48    -48    
144    48     
-208   -16    
160    176    
-464   96     
144    176    
48     32     
-80    -64    
192    112    
-752   -160   
-32    16     
-1024  -48    
-304   32     
16     64     
-560   112    
-96    112    
48     16     
-80    0      
-16    -16    
-48    -32    
112    96     
-80    16     
-832   -32    
48     80     
-112   -48    
96     16     
96     80     
-48    -64    
-32    48     
-144   0      
0      0      
-96    48     
-16    16     
96     48     
-16    16     
0      48     
-32    96     
16     96     
-48    48     
16     0      
80     144    
48     32     
-48    -32    
64     160    
-208   208    
128    336    
-400   0      
304    0      
-656   -16    
-64    -80    
272    -208   
0      -176   
-176   -416   
352    176    
-240   -16    
192    336    
-304   288    
0      -80    
-240   -176   
96     -48    
-16    128    
-48    -32    
0      112    
-448   80     
112    224    
-336   -32    
336    352    
-256   192    
-96    -320   
48     64     
-112   128    
64     -32    
-32    16     
32     0      
-112   -96    
48     48     
-208   -64    
80     128    
-64    64     
112    640    
-592   -144   
-128   -192   
80     0      
16     -80    
-208   -48    
16     112    
-112   32     
208    192    
-176   160    
-48    -192   
48     160    
-80    0      
64     96     
-96    -32    
32     144    
-816   176    
0      -112   
0      -96    
-32    0      
48     -112   
16     208    
16     32     
-176   64     
144    -448   
160    112    
144    368    
144    64     
-128   -128   
64     -176   
0      400    
-64    -144   
112    96     
-240   32     
112    48     
-240   256    
0      -224   
-112   16     
-16    -80    
272    -80    
-80    336    
-32    -80    
-128   -96    
80     64     
-208   736    
112    432    
-224   208    
112    -112   
-768   96     
-160   -80    
0      560    
-208   -144   
-48    192    
-112   80     
64     32     
-160   96     
-80    176    
-384   -576   
288    672    
-128   304    
16     -480   
-32    448    
-128   80     
192    -208   
-256   -464   
672    -240   
-64    1152   
-80    -160   
-48    -384   
-48    464    
128    192    
-240   -240   
144    160    
-224   -48    
80     32     
16     -32    
-112   -96    
80     64     
400    128    
-400   80     
320    96     
0      48     
16     64     
32     224    
144    384    
-224   16     
-96    -224   
-240   -496   
240    368    
-80    256    
0      -288   
-160   16     
144    144    
-208   -288   
-16    -112   
208    192    
-320   256    
224    -352   
-112   -528   
48     896    
48     -272   
96     256    
-64    64     
-112   -384   
176    240    
160    784    
-432   -208   
128    -608   
-80    -736   
304    576    
-16    1248   
-48    -256   
64     128    
160    64     
48     160    
-176   0      
-48    -16    
16     -16    
-64    144    
16     16     
-16    32     
96     80     
-32    80     
0      96     
96     288    
208    0      
-320   -160   
160    160    
-48    224    
-48    48     
-112   -144   
144    112    
-144   64     
144    176    
32     464    
128    64     
-64    -96    
48     48     
128    -208   
80     208    
48     144    
80     80     
64     -32    
80     144    
192    256    
-160   -176   
-64    -64    
64     -32    
16     128    
-288   -576   
64     -272   
96     208    
80     448    
48     416    
-16    -32    
0      -496   
96     -112   
-144   -144   
32     -320   
-16    -32    
128    -64    
0      160    
176    -48    
48     112    
96     -96    
192    -80    
-144   144    
272    -1024  
-240   -144   
256    -16    
-144   224    
80     128    
112    80     
0      128    
304    208    
-192   -128   
208    80     
32     144    
112    96     
176    128    
80     -176   
192    64     
0      -2032  
80     16     
144    144    
-48    176    
160    304    
-304   128    
-144   -160   
224    0      
-48    0      
96     32     
-192   16     
240    32     
48     -64    
128    -304   
144    96     
16     -1344  
384    208    
-144   208    
160    80     
-96    160    
112    32     
-160   -160   
128    -16    
112    112    
16     48     
-64    160    
112    -80    
32     96     
32     -48    
64     32     
32     -256   
128    80     
-48    -448   
112    160    
0      -112   
192    64     
-528   -560   
288    -256   
16     -80    
-64    -48    
64     208    
112    192    
80     80     
-112   -256   
160    208    
-48    -16    
-16    0      
160    -608   
256    16     
16     -256   
48     112    
-48    80     
128    368    
-240   480    
-48    96     
-80    0      
-208   -352   
176    64     
208    16     
-48    128    
112    -224   
-160   -16    
176    -512   
64     80     
-176   -160   
368    16     
-16    -128   
192    0      
-176   -224   
256    96     
144    192    
80     144    
64     176    
112    -320   
0      16     
64     -144   
208    160    
96     -48    
-160   80     
176    -272   
-32    32     
432    144    
-336   96     
80     -32    
144    -96    
384    208    
-352   -208   
224    96     
-48    -112   
144    144    
-64    -192   
-32    16     
208    -32    
32     208    
32     -432   
-128   -1328  
160    96     
112    -224   
32     80     
32     0      
64     -432   
352    240    
-288   -1392  
160    80     
-80    -64    
16     -80    
208    144    
-96    -144   
224    -1600  
16     128    
112    -80    
256    288    
-112   0      
272    -688   
-592   -144   
256    -768   
144    -32    
32     -192   
48     16     
160    -576   
32     -208   
32     -16    
48     -112   
112    0      
0      48     
144    96     
-128   96     
48     16     
32     -176   
-992   -128   
96     -176   
48     -160   
80     -336   
80     -176   
-16    -528   
16     -176   
240    -464   
96     48     
80     0      
-224   -64    
208    -64    
0      -176   
-176   -144   
240    96     
-384   0      
-16    -80    
144    -176   
128    64     
64     -80    
64     -48    
176    48     
32     48     
64     240    
64     -240   
32     32     
112    -128   
-112   -224   
-96    -48    
272    -432   
-48    -336   
48     -368   
80     -320   
208    -160   
-64    -16    
176    32     
64     144    
48     -208   
-96    80     
80     160    
80     112    
0      -144   
112    -16    
-112   240    
144    64     
-400   -256   
16     -688   
-832   -496   
160    32     
-224   224    
64     16     
-112   -32    
16     -512   
160    16     
256    320    
-32    176    
-160   -160   
224    -368   
-96    432    
208    -96    
-96    -16    
-112   48     
-48    -16    
-112   -160   
-1520  496    
-112   -592   
176    448    
16     -432   
96     -80    
-80    -224   
80     0      
0      160    
144    16     
0      256    
-112   160    
112    -240   
48     96     
-80    64     
48     16     
-96    -64    
240    -16    
-272   -80    
-96    -352   
16     -480   
96     -880   
352    -144   
256    320    
32     0      
272    -272   
80     192    
-128   176    
16     -208   
-80    416    
-224   -320   
-224   -416   
80     96     
32     144    
64     -208   
320    272    
16     -64    
272    256    
-272   -128   
16     -80    
-624   -208   
480    64     
-320   336    
-176   -384   
352    -32    
-160   272    
-224   -160   
288    -64    
-16    0      
-704   -112   
-112   -368   
-288   -560   
32     560    
176    240    
-1408  -48    
32     160    
112    -96    
96     0      
-80    -64    
96     64     
112    -16    
0      16     
128    656    
-128   -240   
-64    144    
80     -224   
-80    128    
-32    16     
-48    80     
-288   208    
-304   -368   
-176   -80    
-144   320    
144    -144   
64     160    
-288   -320   
0      -144   
608    928    
-576   -48    
-112   -1040  
96     -256   
368    384    
128    368    
-160   224    
96     -432   
336    400    
-16    288    
208    -64    
-656   192    
448    160    
-304   144    
528    96     
-432   272    
32     -784   
-80    320    
-16    -112   
-368   -368   
48     -544   
32     832    
192    496    
-320   -256   
16     -544   
-48    112    
-448   -64    
-224   16     
304    64     
0      -16    
-144   192    
-112   -208   
144    -208   
-208   -192   
-128   128    
144    192    
-128   544    
16     -240   
-96    528    
-144   192    
-192   -144   
-112   -112   
208    -96    
-576   -192   
320    624    
-464   -448   
144    -32    
-144   0      
32     128    
-80    96     
-96    16     
144    512    
-144   304    
-128   -480   
144    272    
-96    240    
48     -48    
96     208    
-288   96     
208    432    
-256   -16    
64     0      
-112   64     
-80    16     
16     80     
-48    16     
32     64     
-208   32     
80     96     
-128   -256   
-80    -48    
-144   32     
288    64     
-784   0      
160    -64    
-272   -160   
96     -192   
-96    64     
112    48     
-208   16     
-112   -32    
208    48     
-32    112    
208    304    
-608   -96    
-128   16     
-80    -48    
112    96     
-144   -32    
-32    80     
-864   64     
-32    80     
0      32     
208    256    
-112   112    
0      144    
112    80     
80     -48    
64     -16    
-112   -16    
256    128    
-208   0      
64     64     
-112   -16    
176    0      
-128   128    
-16    -48    
-64    64     
176    80     
-48    192    
48     80     
-304   0      
400    80     
-272   -112   
144    -176   
32     336    
-128   160    
-160   112    
16     -32    
-64    16     
64     80     
16     -96    
224    -256   
128    160    
272    144    
-128   80     
0      48     
-48    -32    
128    80     
32     48     
0      0      
-112   -32    
96     0      
-352   -160   
64     192    
144    32     
96     96     
-128   80     
96     48     
-16    176    
16     32     
-32    32     
128    80     
-80    16     
48     144    
-64    112    
-112   112    
-112   64     
64     32     
-128   -272   
-128   -112   
256    288    
-176   -16    
64     0      
-64    -32    
240    -96    
96     0      
-80    96     
96     -32    
-144   -144   
320    80     
-16    160    
112    96     
-48    32     
208    208    
432    368    
-80    192    
272    240    
128    160    
192    256    
176    80     
80     -16    
128    -16    
208    48     
-80    -208   
160    -352   
320    -144   
112    -16    
224    96     
48     16     
304    -240   
-176   -656   
128    -320   
128    -144   
-592   -288   
208    -144   
-272   48     
-192   48     
64     32     
-160   160    
-80    -112   
48     176    
80     -288   
80     -80    
-160   0      
224    112    
64     96     
80     208    
32     80     
-256   -256   
-16    -128   
160    48     
-48    128    
224    80     
-400   -272   
112    48     
16     160    
-160   -800   
-48    96     
-176   256    
112    0      
-64    32     
-64    -48    
208    80     
-32    112    
80     32     
-16    80     
160    272    
-64    144    
32     16     
16     32     
160    96     
-64    -224   
48     -16    
48     -1104  
0      96     
-32    64     
-32    64     
96     192    
224    176    
-144   96     
16     96     
48     32     
64     80     
-128   0      
48     -16    
128    80     
112    0      
80     112    
-16    -192   
208    160    
-80    -816   
64     16     
-80    -240   
32     64     
96     -16    
0      80     
-64    -32    
240    144    
80     32     
-128   -160   
64     48     
-16    -208   
48     80     
-128   -528   
128    16     
-128   -704   
400    -80    
-128   -80    
240    16     
208    224    
-128   48     
64     64     
112    112    
-16    48     
48     -112   
16     128    
32     -32    
176    512    
96     -208   
-256   -288   
80     -624   
-64    144    
208    -704   
-112   -256   
208    144    
-80    32     
32     144    
16     112    
64     224    
-96    256    
112    -32    
192    192    
-112   64     
-48    -272   
128    -96    
-64    -304   
80     144    
48     -80    
160    112    
-192   -32    
48     -208   
32     704    
48     -1184  
32     176    
0      48     
-64    -80    
64     -224   
-16    -48    
256    64     
-272   -16    
-192   -704   
-64    -640   
160    -32    
176    864    
48     256    
64     -80    
96     -48    
-80    -16    
96     32     
48     -80    
160    144    
-80    80     
64     32     
128    -96    
-16    64     
64     -256   
48     112    
0      64     
160    112    
-144   -336   
96     -1104  
-80    -64    
80     0      
-16    -1136  
64     -160   
-80    -1712  
-128   -400   
336    -416   
-48    -192   
352    240    
-272   -368   
640    720    
-80    912    
-96    128    
208    224    
144    208    
-176   -192   
48     -352   
208    -656   
-160   -368   
240    -352   
80     -160   
320    -160   
-80    -112   
176    192    
80     48     
128    -16    
-48    -32    
224    32     
-64    0      
-384   -224   
-80    -784   
-1056  -720   
80     0      
48     160    
0      416    
368    240    
-16    -192   
96     144    
-272   -432   
-320   -384   
144    -352   
144    -32    
112    -272   
224    208    
16     0      
464    208    
-496   272    
16     -352   
-64    -128   
-64    -448   
160    -192   
16     -96    
48     240    
-48    -864   
96     320    
48     -192   
-112   -144   
320    112    
-176   0      
48     -96    
-16    1008   
0      -464   
-144   -320   
-112   -144   
80     -144   
48     -144   
160    -16    
304    368    
-304   -608   
400    576    
-48    224    
160    -256   
160    176    
384    224    
-144   32     
144    -96    
-32    -112   
176    144    
-208   128    
-160   -320   
32     -432   
80     256    
-176   16     
272    -432   
-144   0      
112    -688   
272    80     
176    -96    
96     -192   
-288   16     
336    -144   
-144   -48    
-16    -272   
-48    -16    
80     -208   
-640   112    
48     -336   
-272   -112   
224    -320   
-128   96     
128    -288   
-32    32     
-16    -160   
-16    -176   
-448   -112   
0      80     
-192   240    
288    320    
-96    192    
-48    16     
-576   -16    
-16    -816   
-64    -160   
240    -208   
-16    240    
144    -496   
112    192    
-304   48     
96     256    
-80    64     
80     304    
304    176    
-272   32     
-112   -80    
16     -224   
-96    -48    
80     -176   
-64    -304   
-80    -352   
-80    -240   
320    -384   
-64    -176   
-16    -32    
16     -80    
0      -160   
64     -80    
-48    -64    
96     -176   
48     -96    
48     64     
80     48     
-704   64     
96     80     
-1056  -224   
80     160    
-64    192    
-672   -64    
-32    32     
-416   -144   
-32    64     
-1760  96     
-256   0      
160    -32    
80     176    
-96    -128   
-128   16     
16     128    
-80    160    
-208   -176   
320    400    
-256   16     
-112   0      
128    -32    
-352   -96    
-160   -128   
-432   -16    
112    16     
-32    80     
-16    -32    
-48    0      
112    48     
-96    -160   
112    128    
-64    16     
-112   64     
96     112    
-144   -32    
0      192    
-224   -32    
-48    -16    
-48    -48    
-64    16     
-768   -16    
-192   16     
112    -80    
-112   80     
112    96     
-112   48     
0      -96    
144    48     
-144   64     
16     16     
-112   96     
-48    64     
224    208    
-240   336    
-112   -112   
-208   -592   
-160   -384   
32     144    
80     432    
-144   112    
48     240    
-16    32     
96     -96    
-64    192    
32     64     
-144   32     
224    176    
-304   80     
-64    -32    
-48    16     
-96    48     
64     48     
-464   -16    
176    96     
-112   -80    
192    48     
-64    0      
16     -16    
96     80     
-80    96     
112    32     
-160   16     
0      32     
0      288    
224    128    
-192   -80    
80     16     
-48    16     
-320   96     
256    -112   
-48    112    
128    80     
-112   32     
-48    48     
80     -32    
-112   -48    
192    80     
-80    -64    
-304   176    
-48    16     
-496   -256   
160    16     
-208   -80    
80     240    
160    48     
-64    -16    
80     32     
48     -32    
144    -48    
-112   112    
80     16     
-32    64     
-32    0      
256    48     
144    192    
-352   -64    
416    32     
-544   192    
336    -48    
-336   176    
32     32     
-144   -96    
48     32     
48     128    
80     -32    
-256   80     
352    -80    
-32    0      
16     80     
176    64     
-304   32     
176    64     
-48    80     
128    128    
80     96     
-96    -32    
96     160    
80     160    
-160   16     
128    32     
-16    32     
32     0      
208    176    
-480   64     
80     16     
-176   0      
176    -64    
32     48     
-128   32     
80     80     
0      32     
64     160    
208    224    
-240   160    
-192   32     
32     112    
-32    32     
-112   -16    
112    0      
304    176    
-384   -48    
160    64     
96     0      
-80    16     
144    -96    
192    128    
144    0      
-144   112    
192    96     
-32    112    
-32    80     
48     -16    
64     -16    
-32    0      
368    480    
-320   -176   
224    208    
-16    128    
32     -80    
128    -96    
-16    96     
96     208    
-176   -32    
-64    -48    
224    -320   
-112   160    
-16    288    
400    320    
-576   -752   
560    448    
-208   304    
-112   -512   
-16    128    
48     96     
0      0      
-192   96     
208    16     
-144   96     
64     48     
96     128    
16     48     
-208   -80    
320    -112   
-128   544    
16     -128   
192    -224   
-96    688    
192    -192   
-80    80     
144    80     
112    -64    
-272   -208   
80     -256   
96     0      
-48    64     
-48    64     
16     16     
128    64     
64     80     
64     32     
0      48     
112    -1184  
-192   -64    
112    80     
-64    128    
128    240    
-64    112    
64     32     
-32    0      
32     -144   
0      112    
-112   128    
304    96     
-96    176    
-48    48     
48     528    
-48    384    
48     112    
128    -352   
176    624    
80     256    
144    32     
-96    64     
192    -16    
-32    32     
224    112    
32     48     
192    160    
-336   16     
160    -96    
-144   80     
16     -32    
80     144    
192    -128   
-96    352    
-112   -192   
-32    -320   
-48    -144   
48     -80    
-80    -240   
-80    64     
-160   -128   
304    0      
-176   96     
-160   -288   
-736   -1040  
176    -704   
-208   160    
-16    -720   
-144   208    
144    -1280  
-96    384    
272    80     
64     144    
-192   560    
-48    -64    
-352   -384   
176    -128   
80     288    
-160   80     
48     64     
272    -112   
-560   -208   
224    -1184  
-48    544    
256    368    
96     336    
-96    -560   
128    112    
-96    16     
32     -64    
224    160    
144    304    
-160   224    
128    112    
400    672    
-304   832    
112    -96    
-176   -240   
-16    80     
-64    -480   
560    480    
-240   48     
80     -64    
-16    -304   
256    -48    
192    352    
64     992    
16     480    
16     -800   
160    64     
16     0      
48     384    
0      240    
352    160    
-352   -864   
80     -176   
16     -64    
112    -144   
176    256    
-80    400    
-352   -160   
288    -272   
-160   112    
352    32     
-192   -16    
128    0      
-80    128    
0      -80    
16     -48    
96     -208   
32     -208   
240    -208   
64     80     
64     32     
16     256    
-176   -736   
112    -112   
0      224    
240    16     
-192   -112   
224    -320   
-32    112    
320    80     
-112   128    
32     192    
112    48     
-64    -128   
144    -960   
64     16     
-32    -368   
96     -32    
384    80     
-32    -96    
-80    64     
400    -1280  
-32    -128   
160    112    
48     16     
304    208    
-256   -160   
160    -624   
-144   -64    
64     -464   
80     -16    
-80    128    
64     -16    
128    -32    
-16    -112   
32     -112   
32     48     
-48    -64    
144    -176   
128    -112   
64     -352   
176    176    
144    -160   
-160   48     
128    16     
0      32     
-128   -48    
48     -256   
-1056  -144   
96     -48    
144    144    
-96    -96    
32     -80    
224    -64    
-96    -128   
96     -1328  
-32    64     
64     80     
-48    224    
192    0      
0      -160   
-208   -16    
48     -128   
-400   -32    
80     48     
80     -96    
-64    -208   
96     -96    
48     -272   
128    16     
96     -1008  
-128   -32    
32     -16    
144    48     
16     -160   
96     0      
-112   -160   
16     -128   
-144   -32    
128    0      
-480   -128   
80     -96    
176    32     
-16    -32    
96     64     
96     -64    
160    400    
32     -256   
-80    16     
96     -16    
32     -16    
32     -16    
-48    -96    
16     32     
64     0      
48     -16    
48     -80    
-128   64     
16     -80    
-192   -208   
192    -400   
-16    192    
192    -272   
0      96     
48     32     
64     32     
-32    32     
-32    -224   
-320   -64    
-16    -48    
96     48     
-80    48     
-144   -64    
176    -176   
-176   -96    
48     -336   
144    64     
-128   -896   
16     -448   
-64    -48    
64     -96    
-256   96     
16     -16    
-224   -96    
32     112    
-16    0      
128    -32    
16     -128   
272    0      
-208   64     
64     -160   
144    -64    
0      -336   
192    -32    
-208   -16    
160    -96    
-160   16     
144    80     
-64    0      
224    -80    
-144   -64    
176    -16    
-384   16     
128    -96    
-32    128    
80     64     
-336   176    
-32    -48    
-592   -16    
-384   -96    
384    -112   
-80    224    
112    -64    
-256   -144   
176    0      
-160   32     
64     16     
-192   -16    
-192   -48    
-256   -336   
-288   -688   
0      -80    
128    208    
-272   144    
112    48     
-144   96     
48     80     
-1040  64     
-16    -96    
32     0      
-48    96     
-80    -64    
80     80     
-64    -96    
0      48     
-304   -240   
-304   16     
144    -48    
-128   128    
144    208    
-608   -96    
-176   48     
-592   64     
-16    16     
-160   -208   
240    32     
-720   -240   
144    128    
-160   -208   
-64    -112   
112    -144   
-32    80     
-144   -336   
-304   -272   
304    112    
-208   96     
-64    240    
-496   16     
32     32     
-464   64     
-96    80     
-48    -80    
-64    160    
-176   -144   
96     80     
-32    224    
48     0      
-256   -32    
208    32     
-128   -32    
-48    -96    
128    64     
32     96     
-80    -96    
-304   -128   
160    -160   
-16    80     
240    112    
-64    208    
160    320    
240    384    
-288   320    
160    352    
-400   -336   
176    -288   
32     32     
64     272    
48     192    
0      -96    
-64    176    
-64    160    
-160   -96    
32     224    
48     -160   
-96    -64    
320    144    
-384   112    
448    96     
-400   -304   
272    384    
-288   -96    
112    128    
-176   -64    
96     112    
-80    176    
-48    144    
-1152  -624   
320    320    
-256   224    
-64    -208   
336    32     
-96    432    
64     112    
-32    -32    
64     48     
-32    48     
0      96     
64     64     
64     80     
-32    -32    
64     128    
-112   -48    
80     48     
32     96     
400    304    
-240   416    
-64    0      
336    64     
-304   160    
80     -16    
0      16     
16     112    
-16    -48    
-128   144    
80     0      
-48    96     
-224   48     
144    112    
32     16     
112    0      
-192   -192   
64     -128   
-80    64     
-80    80     
112    -16    
-112   -80    
112    -96    
-32    0      
-80    -224   
-112   112    
-32    208    
-144   112    
32     160    
-96    -64    
80     80     
-144   -80    
80     32     
0      112    
320    608    
-64    80     
-48    256    
-208   400    
16     -32    
16     96     
-112   48     
32     -64    
-144   64     
-64    16     
-16    144    
160    64     
-32    96     
16     32     
-80    32     
80     64     
0      64     
-112   0      
192    112    
-304   -176   
-112   -144   
-192   -496   
64     -192   
0      160    
-48    -176   
48     224    
32     -160   
128    16     
64     224    
208    384    
288    1248   
-624   -64    
-32    -960   
-48    160    
-48    368    
-48    144    
-48    144    
80     -128   
48     192    
-208   -48    
176    -416   
272    160    
-160   -32    
-16    112    
-16    -304   
-16    416    
448    448    
-352   -128   
-32    160    
-48    192    
-16    368    
176    272    
-176   -32    
304    128    
-64    144    
-16    48     
-112   -80    
224    64     
80     128    
32     -64    
-48    640    
240    336    
-288   -112   
144    0      
-144   -32    
144    -80    
96     -144   
64     -432   
-80    -80    
304    48     
-144   128    
432    336    
-448   224    
144    -48    
-192   -16    
96     -64    
48     -48    
-16    -192   
-272   144    
480    -16    
-432   -352   
496    160    
-48    -320   
-128   48     
-128   -240   
592    128    
-48    224    
336    128    
-224   192    
672    256    
-704   -32    
224    0      
16     48     
256    144    
-96    64     
112    144    
-48    64     
144    -80    
144    128    
-32    -176   
48     48     
192    112    
224    48     
-208   48     
144    96     
144    272    
-256   112    
48     -96    
128    48     
0      16     
-112   -352   
160    112    
0      -192   
0      16     
-32    -1296  
176    96     
-176   176    
96     32     
32     192    
224    192    
-208   -96    
176    144    
-48    32     
64     112    
64     -32    
-96    -64    
64     288    
-112   -192   
224    -80    
144    -688   
176    48     
112    -192   
96     176    
-32    96     
32     80     
-32    32     
96     64     
192    320    
0      -32    
32     112    
272    144    
80     48     
80     16     
-112   64     
96     -48    
-32    96     
224    -256   
144    96     
-160   -112   
288    80     
-160   32     
144    0      
-48    64     
-48    -96    
16     16     
144    16     
160    80     
-160   -336   
-16    32     
128    -112   
-32    128    
48     48
[truncated: 326,011 more chars]
