# Supplementary material for: A Fault Diagnosis Method for One‐Dimensional Vibration Signal Based on Multiresolution tlsDMD and Approximate Entropy
Source: Hindawi journal article supplement (doi:10.1155/2019/3262818), 2019-01-01
Supplement: f1 [file 3262818.f1.zip › 3262818.f1/gear signals/wear gear signal/Data4.txt]

48     32     
-16    -752   
336    16     
0      224    
-144   -32    
-16    -496   
96     -416   
128    -208   
64     304    
64     -256   
-80    -192   
32     -176   
288    -112   
-160   -128   
-160   64     
256    272    
16     336    
64     -64    
112    -96    
-80    32     
224    -128   
-288   -400   
272    -352   
-32    -304   
272    -304   
-32    -48    
240    -704   
-32    80     
224    128    
-112   80     
160    48     
-32    48     
-32    16     
112    -96    
-320   -48    
272    48     
-288   -48    
144    0      
96     -80    
176    -144   
-64    64     
128    -288   
-80    -32    
96     -480   
-176   -96    
176    -16    
-32    48     
-224   48     
144    32     
-144   48     
-48    -320   
-192   -192   
160    96     
-256   -256   
400    -144   
-272   112    
384    -64    
-176   48     
112    -416   
-64    -16    
224    80     
-128   -48    
256    128    
64     -96    
-208   32     
496    176    
-320   16     
176    -32    
-272   144    
48     48     
-368   -64    
176    -80    
32     -64    
208    -176   
288    112    
96     -304   
192    192    
-320   64     
128    -176   
-224   -80    
144    96     
80     0      
-224   -16    
-496   112    
96     -32    
-496   112    
128    -336   
0      0      
96     -464   
176    -16    
64     -1488  
160    -192   
-288   48     
16     -16    
48     -32    
64     96     
-80    48     
-16    -208   
-320   -176   
160    -240   
112    -16    
336    80     
-64    64     
112    -176   
-224   64     
-112   -160   
64     160    
-96    -32    
-368   0      
-48    -64    
-64    -80    
-48    16     
-144   -80    
-272   64     
-112   -32    
32     80     
-64    -64    
-48    160    
-880   -224   
-64    0      
-96    -16    
-1056  -176   
112    0      
-576   304    
-112   -208   
16     16     
96     32     
-208   0      
-112   32     
304    48     
-192   80     
-832   -224   
112    -64    
-496   -80    
-128   -96    
-48    0      
192    160    
144    -16    
-592   16     
48     48     
-416   -32    
192    16     
-16    64     
0      16     
-80    -96    
-16    80     
-160   -192   
-16    80     
-48    0      
-32    112    
-16    96     
-176   32     
-16    -224   
-272   -176   
-32    208    
96     48     
0      32     
-16    -48    
-64    16     
0      -160   
32     -80    
-16    -96    
96     160    
-224   96     
0      16     
-32    80     
-192   0      
80     32     
-304   176    
144    336    
-448   0      
-160   -96    
-960   -320   
-16    48     
160    -16    
-128   144    
144    -32    
-80    192    
112    240    
-304   176    
0      64     
48     -80    
-32    16     
-48    128    
-48    96     
-64    16     
0      32     
-368   32     
-32    192    
-176   -384   
208    -64    
0      -80    
-160   64     
-32    80     
-32    288    
-128   -96    
-176   -832   
144    -80    
-32    -208   
-176   -80    
128    -112   
64     176    
-208   -160   
-32    80     
-1808  -240   
-144   16     
96     -112   
-192   -80    
176    32     
-112   -144   
64     160    
-144   0      
176    64     
-240   144    
64     528    
16     192    
-64    -144   
-432   -320   
0      -16    
-800   16     
192    368    
48     -80    
-192   -112   
-16    -160   
144    272    
-80    352    
352    176    
-176   608    
128    -368   
224    -96    
-128   192    
208    -704   
16     496    
256    48     
-448   32     
176    -240   
80     32     
-160   -208   
176    400    
-224   -272   
176    -64    
-32    -160   
224    768    
-224   -304   
112    32     
-208   32     
32     -32    
-32    -32    
-48    -208   
128    272    
-288   -32    
240    -96    
-320   160    
-32    -32    
0      192    
64     64     
-80    32     
32     192    
-224   -32    
-64    -160   
-64    -160   
-192   352    
-112   -240   
-64    -208   
-384   -96    
-224   -128   
208    96     
-128   48     
288    800    
-176   -304   
416    -128   
-64    368    
368    400    
-240   272    
-224   -912   
0      -464   
272    416    
176    288    
-336   48     
384    -64    
-32    224    
304    192    
0      -80    
-256   -128   
304    -112   
-176   256    
-112   -96    
48     -96    
-416   -352   
240    -112   
160    80     
400    608    
-512   64     
240    -400   
-96    464    
208    -48    
64     224    
80     96     
-96    -64    
32     96     
80     144    
16     784    
112    -448   
112    96     
-128   384    
-304   -704   
96     160    
-32    64     
-144   128    
-48    48     
368    432    
-288   -112   
64     -64    
-144   416    
32     -64    
32     176    
-176   128    
240    16     
-416   -240   
288    176    
-192   0      
176    80     
-32    128    
64     80     
16     64     
48     64     
144    64     
-336   128    
336    -32    
-128   320    
160    464    
-1008  -1424  
544    -272   
-128   1056   
0      -352   
-160   -768   
304    192    
400    592    
-480   544    
304    -80    
-48    -112   
160    1072   
192    320    
-272   -192   
32     -32    
-16    -80    
-112   96     
16     112    
-32    -464   
240    320    
-48    80     
144    -336   
-64    192    
48     -848   
80     32     
0      -64    
80     -144   
64     336    
352    96     
-32    0      
16     48     
0      80     
144    112    
-16    48     
64     80     
-48    0      
336    160    
-160   -160   
-112   -96    
32     64     
160    384    
-112   176    
-96    -400   
192    576    
80     192    
160    272    
256    336    
16     -272   
-16    160    
80     480    
16     144    
-128   -224   
144    -48    
32     -256   
-32    32     
112    -2560  
32     96     
0      32     
112    80     
96     -336   
0      96     
160    48     
32     112    
-128   0      
96     48     
-64    -80    
96     -16    
48     128    
-192   -544   
176    144    
112    -320   
-80    32     
160    -64    
-128   144    
0      -256   
0      -32    
-48    -16    
-64    64     
112    80     
80     80     
16     96     
128    96     
160    144    
-80    -80    
272    112    
-160   -208   
80     112    
-144   -624   
624    -80    
-256   208    
400    352    
-224   48     
144    256    
48     48     
-272   -272   
256    -64    
-48    -416   
192    32     
32     -208   
16     48     
-16    -144   
48     96     
96     -64    
128    160    
-112   96     
-16    144    
48     96     
-16    80     
144    144    
80     -288   
-176   16     
352    -128   
-224   48     
304    -192   
112    112    
64     -128   
432    320    
-368   -1280  
176    48     
-32    32     
112    160    
0      80     
48     128    
192    208    
-32    -96    
208    128    
192    96     
-144   144    
96     -176   
-112   128    
-112   -160   
304    -176   
80     -432   
160    -48    
-128   -112   
272    -1392  
-80    -224   
-1312  -224   
368    -448   
144    208    
240    240    
32     -128   
464    64     
288    16     
64     16     
96     16     
112    -48    
-48    -736   
-160   -720   
32     160    
112    -304   
-208   320    
64     112    
176    16     
96     0      
-48    -240   
64     -96    
64     -960   
192    -64    
48     144    
-240   -208   
-32    64     
-80    -128   
112    -16    
-16    80     
-48    -32    
272    -144   
-320   -16    
128    -80    
0      -48    
0      -320   
128    16     
-144   -112   
240    16     
-48    -1408  
-48    -224   
288    -144   
-176   176    
224    -16    
-16    96     
240    0      
-96    -144   
64     0      
208    -80    
-416   -16    
208    16     
-48    -80    
96     -208   
160    -16    
96     -1168  
-80    -16    
64     80     
-80    64     
80     -48    
0      0      
-144   0      
48     -48    
-160   32     
0      -16    
-304   0      
0      -176   
0      -96    
0      0      
80     32     
-160   -32    
-48    -32    
176    -672   
128    96     
80     -48    
-32    96     
-80    -32    
32     0      
16     80     
16     0      
-176   0      
112    -128   
-896   -80    
32     -208   
32     128    
-32    -112   
0      -16    
64     -352   
-32    -64    
80     48     
224    0      
-256   -128   
144    -48    
-192   -240   
48     -112   
-208   -160   
32     48     
16     0      
32     -64    
-144   0      
240    -48    
-16    64     
-16    -320   
112    -64    
-224   -144   
48     -288   
112    112    
-16    96     
-48    112    
64     80     
-256   48     
112    -80    
-48    224    
16     144    
-592   -32    
112    -496   
-64    32     
112    32     
48     -32    
64     240    
-64    -32    
-16    -128   
64     112    
16     256    
32     -176   
-64    0      
-208   -400   
80     -240   
-32    144    
-208   -608   
-160   80     
64     -80    
144    224    
112    464    
-672   -448   
144    -208   
-240   80     
128    32     
48     -80    
48     64     
64     32     
-16    -160   
16     32     
80     -128   
-320   -96    
-48    -432   
96     80     
-960   -160   
208    -16    
-32    32     
-96    0      
112    64     
-624   32     
-208   -384   
208    -96    
-368   -64    
256    -192   
-48    208    
-336   160    
64     112    
-288   -96    
240    304    
-480   -16    
80     96     
16     144    
-448   240    
-32    -208   
-272   0      
-16    96     
304    32     
48     576    
480    560    
-96    368    
384    144    
-448   -16    
144    -304   
128    688    
-160   32     
-16    -240   
0      224    
-128   160    
-192   0      
64     -48    
96     -128   
-496   48     
144    32     
0      160    
-128   352    
-208   -144   
-16    64     
-96    48     
-64    352    
-176   64     
96     -32    
-48    560    
-16    128    
-112   -288   
-272   160    
320    -240   
32     -240   
-208   368    
-144   176    
-112   128    
-64    -560   
-16    -64    
160    -96    
-112   80     
48     448    
80     0      
-208   0      
64     -192   
-160   608    
-32    288    
16     112    
-304   -16    
32     160    
-576   176    
-64    32     
-48    -64    
-16    -112   
96     80     
-32    48     
-176   -352   
0      -224   
-64    -256   
64     848    
-48    240    
-160   -256   
-96    240    
160    112    
-336   80     
-32    16     
-320   -48    
-832   416    
-720   816    
16     -1280  
128    240    
112    576    
-64    -336   
-16    -112   
-64    -160   
-64    16     
16     144    
-96    -464   
-80    544    
352    272    
-224   80     
48     32     
-688   -256   
64     656    
64     96     
-336   -160   
32     -224   
-160   -48    
16     0      
-176   -144   
48     -32    
-128   -48    
32     -112   
-48    -32    
368    48     
-400   -672   
192    176    
-288   -144   
-64    -400   
176    0      
176    400    
128    80     
-48    64     
16     -48    
64     -448   
272    304    
80     416    
64     80     
-144   -112   
320    352    
-448   -336   
240    16     
-240   -128   
192    240    
-112   96     
80     -64    
256    544    
-240   -240   
112    -384   
-192   -16    
80     144    
32     160    
112    -64    
-96    -112   
32     96     
-16    0      
192    -128   
-192   -80    
208    32     
-128   80     
160    32     
0      96     
272    368    
-208   96     
96     192    
-48    112    
-112   64     
208    -16    
-160   32     
224    64     
-80    48     
256    176    
-176   16     
96     80     
64     144    
64     144    
160    96     
-96    -32    
-128   -128   
96     16     
16     80     
-32    32     
-16    80     
0      -16    
16     32     
-112   -352   
16     -32    
448    352    
-272   192    
-96    -16    
144    96     
32     64     
-48    208    
-48    32     
80     64     
144    336    
-80    32     
144    128    
-48    -96    
128    128    
-48    64     
-48    80     
128    32     
-48    32     
0      64     
-144   192    
208    80     
-32    96     
176    192    
48     112    
0      64     
-80    -80    
96     112    
-272   80     
256    80     
96     144    
-96    -96    
-112   -112   
128    0      
-96    64     
-32    80     
-128   -16    
0      352    
-64    112    
-160   -96    
-48    -32    
-32    64     
160    32     
48     -192   
48     -16    
-96    144    
256    320    
-64    64     
-64    32     
208    64     
-48    128    
208    -16    
-304   64     
208    -16    
-16    112    
80     0      
32     16     
160    144    
-160   -112   
-272   -416   
272    128    
-16    -64    
0      80     
48     144    
176    0      
32     96     
144    80     
0      48     
208    176    
-192   160    
64     368    
-192   -128   
544    688    
-592   240    
48     -352   
-32    16     
96     -160   
-192   16     
-48    -64    
192    80     
48     32     
-64    -32    
48     -80    
240    400    
-208   -64    
0      80     
48     -16    
0      112    
-96    -176   
80     -176   
224    128    
-128   -256   
272    224    
16     -2752  
64     64     
144    112    
80     48     
96     128    
112    64     
0      -112   
192    128    
-32    -96    
144    144    
160    96     
64     32     
96     112    
-16    -112   
-16    48     
224    -112   
80     176    
-32    -176   
-16    48     
-16    -128   
112    -96    
0      48     
208    144    
-64    64     
-80    -48    
320    192    
-64    -144   
128    48     
16     -80    
176    64     
16     -256   
160    112    
32     -400   
0      96     
128    64     
-112   96     
80     128    
-112   -32    
144    -64    
208    64     
128    96     
16     -128   
32     80     
32     -176   
192    48     
16     -272   
96     32     
80     -368   
112    64     
32     80     
256    336    
-272   -48    
48     -176   
96     128    
208    -224   
96     32     
96     -192   
176    48     
128    -128   
-48    96     
0      -352   
48     96     
16     32     
16     112    
48     96     
64     176    
-16    272    
240    96     
192    -192   
-256   -672   
272    1264   
-128   -464   
240    16     
32     64     
-32    16     
16     -96    
96     80     
80     -16    
64     -864   
-64    16     
96     -800   
-64    32     
-1104  -16    
-64    -112   
-64    -560   
288    -704   
-96    -32    
160    -1184  
-16    256    
176    -32    
80     160    
96     -304   
0      -64    
48     -208   
0      -80    
64     96     
16     -144   
-96    112    
64     -448   
-48    -464   
288    -16    
-208   -48    
64     -896   
288    48     
-112   -32    
176    -64    
-32    -144   
112    -64    
0      -480   
176    400    
32     144    
48     -96    
-448   -80    
-16    -80    
128    -160   
-96    -176   
224    160    
208    304    
224    240    
-32    -1328  
224    64     
48     -496   
-112   -16    
48     -144   
16     80     
32     -32    
80     -32    
-240   -224   
112    0      
-640   48     
224    -64    
-48    32     
160    0      
32     16     
160    -432   
-16    16     
-192   -640   
80     176    
64     -16    
96     320    
16     224    
-64    -80    
-96    -16    
144    -32    
-272   -96    
176    -368   
176    -160   
-320   -368   
128    -192   
-80    -80    
80     144    
320    464    
-144   208    
352    272    
-320   -16    
32     -176   
160    -112   
-144   -32    
16     176    
-576   128    
-32    -272   
-1040  64     
192    0      
-96    112    
-240   -272   
176    80     
-256   -576   
64     -400   
0      208    
64     32     
-16    -32    
176    160    
-160   64     
-32    -144   
-400   -32    
368    336    
-560   176    
-32    480    
320    -128   
80     -528   
112    128    
48     -432   
160    -128   
16     -96    
432    624    
-416   -192   
64     -912   
-144   64     
144    -128   
-160   -304   
112    96     
48     160    
48     -80    
-176   -416   
496    -208   
80     592    
320    -48    
-224   -48    
112    -48    
240    480    
-480   512    
176    -128   
-80    0      
-16    208    
512    528    
-80    640    
-416   448    
80     32     
-496   80     
176    -304   
-64    -32    
128    -384   
64     208    
80     128    
320    160    
-48    -32    
-48    -304   
96     -384   
64     -96    
112    32     
160    -32    
-160   -32    
-128   16     
208    144    
-288   -32    
-16    48     
-528   -256   
-224   -64    
-64    -144   
-672   -224   
128    16     
-656   -112   
0      -32    
-64    48     
32     80     
304    368    
-368   208    
-224   288    
96     16     
-112   -192   
224    80     
-304   -160   
-144   -272   
-48    -128   
112    -16    
-48    -304   
-208   -480   
-192   -160   
-880   0      
-160   16     
-16    -16    
32     64     
-144   32     
-16    80     
-144   -96    
80     144    
-96    -96    
32     16     
48     32     
-96    -32    
-96    -96    
-192   16     
112    64     
-448   16     
176    32     
-160   -48    
64     64     
-176   -288   
224    48     
16     32     
-224   -32    
64     96     
-160   32     
16     -16    
-224   -224   
32     16     
208    288    
-224   208    
32     96     
-288   32     
-528   -192   
32     80     
-64    -112   
144    80     
0      -48    
160    0      
-96    80     
96     48     
-128   -16    
112    48     
80     288    
0      192    
-96    96     
-128   32     
-128   48     
-496   -96    
144    80     
-80    -112   
0      112    
64     -144   
-48    48     
-80    48     
-144   16     
240    144    
-32    96     
16     224    
-48    -48    
-32    -16    
-64    -64    
48     64     
-16    64     
-48    -16    
-432   -80    
112    96     
208    128    
80     96     
-80    0      
208    160    
-64    48     
-96    80     
176    48     
-208   -64    
128    -32    
-48    64     
32     16     
16     128    
48     16     
-704   -144   
304    -32    
-176   -16    
192    -48    
-192   64     
128    80     
-80    64     
64     48     
96     176    
-112   -64    
96     -128   
-80    0      
176    128    
-336   -160   
96     64     
-64    96     
16     96     
16     176    
-16    -48    
-80    96     
-64    96     
-64    -16    
112    32     
-80    160    
144    -48    
-48    64     
0      48     
-48    32     
32     80     
128    32     
176    48     
-16    80     
80     64     
-64    -32    
16     96     
-64    -48    
16     112    
16     160    
112    144    
32     80     
-256   96     
80     -48    
-160   96     
0      -32    
48     192    
-192   64     
-48    -32    
128    80     
-256   -64    
304    -64    
32     144    
96     112    
-64    -16    
-80    0      
176    112    
0      144    
-128   -48    
352    272    
-192   -32    
0      -112   
-64    176    
112    -112   
-48    -16    
112    128    
208    192    
-160   32     
64     16     
304    -48    
-16    64     
-16    80     
48     80     
0      32     
0      48     
-272   -160   
160    64     
0      144    
144    128    
80     16     
304    320    
-352   48     
-16    64     
96     112    
192    96     
-16    112    
96     -64    
-32    208    
144    224    
-240   224    
0      144    
64     -16    
-96    -160   
320    -16    
80     144    
208    0      
-336   160    
352    -80    
-64    96     
0      -64    
64     80     
-16    -48    
144    112    
-208   0      
240    224    
16     320    
32     256    
-144   112    
32     -352   
-48    32     
64     80     
-48    -16    
112    144    
16     144    
48     64     
80     -64    
176    32     
-32    144    
-64    128    
-16    32     
128    224    
320    336    
-368   -448   
64     112    
0      288    
256    16     
-240   -48    
224    224    
-96    0      
-80    352    
160    -336   
-112   400    
128    -112   
-48    144    
64     -528   
32     144    
144    -592   
-96    192    
192    336    
0      -144   
-192   -528   
176    -48    
128    368    
-112   240    
-48    -80    
320    80     
-208   48     
128    48     
48     96     
48     -112   
112    128    
32     -400   
48     48     
32     64     
64     128    
224    112    
-112   208    
-48    -48    
80     -64    
-80    -144   
208    160    
-64    32     
48     160    
48     112    
-32    -32    
352    400    
-192   -16    
-16    -128   
176    -1072  
128    -112   
-64    -224   
144    -16    
128    160    
-32    208    
-96    -16    
128    128    
-80    64     
16     -48    
-16    32     
64     48     
-48    128    
64     48     
0      64     
64     -528   
80     160    
-96    -160   
224    -144   
-96    176    
176    272    
-304   304    
336    -96    
-272   -352   
368    -16    
-48    224    
96     -336   
80     48     
32     -336   
96     0      
64     -304   
-16    -16    
64     -416   
160    208    
96     -16    
32     144    
-32    96     
112    80     
48     128    
-48    -384   
-176   -560   
16     -784   
96     256    
176    -48    
-80    80     
288    -16    
-112   80     
16     -448   
96     80     
-16    48     
-16    -16    
272    944    
-256   320    
80     -528   
208    -256   
64     288    
32     624    
224    16     
-144   -800   
144    -112   
-80    640    
240    160    
-208   -672   
112    176    
-176   -64    
128    272    
-304   48     
336    -32    
-32    -1152  
-48    -144   
224    -80    
64     16     
320    1280   
144    -32    
-64    -352   
160    -48    
144    128    
-16    -368   
112    -976   
272    640    
400    384    
-48    400    
-368   48     
0      -352   
32     -96    
-48    -1056  
128    -80    
48     -224   
-48    -144   
144    64     
-112   288    
272    192    
-64    96     
48     -304   
-96    0      
288    -160   
-144   -112   
112    272    
-272   -160   
96     -128   
96     -336   
-64    -224   
240    -816   
80     0      
128    -80    
304    160    
-176   32     
0      -32    
48     -48    
112    0      
240    -64    
-112   -224   
-112   0      
272    -96    
32     -64    
112    -176   
-64    -80    
272    128    
224    160    
64     -720   
464    368    
-304   160    
96     160    
-176   64     
144    80     
-96    32     
-96    -320   
-80    -80    
64     -112   
144    80     
80     0      
64     32     
-32    -112   
48     0      
-80    -160   
-208   96     
-48    64     
-176   80     
112    16     
96     160    
-256   -48    
96     -208   
-240   0      
128    -16    
0      -48    
320    80     
-128   -160   
-112   -304   
-320   -208   
224    -416   
144    224    
-240   -80    
-16    64     
144    -48    
208    0      
-128   0      
32     -112   
-192   -64    
32     112    
-256   0      
-16    -96    
-560   -16    
176    -16    
192    80     
-80    -32    
64     64     
96     -544   
-64    0      
112    -208   
-96    -128   
-64    -64    
144    -224   
-64    144    
224    0      
-176   -80    
96     -64    
64     80     
-64    -32    
-528   -80    
176    -320   
-192   144    
416    -160   
-144   32     
48     0      
-64    -48    
-208   0      
256    -96    
-768   -128   
208    -112   
-176   0      
32     -16    
96     -128   
-32    64     
48     32     
-112   -304   
32     16     
272    -304   
-80    192    
-16    -32    
288    240    
-352   0      
80     80     
-48    -64    
80     96     
-64    0      
48     96     
-1056  -256   
64     -256   
32     64     
-64    -160   
176    128    
-608   -96    
-1344  96     
272    144    
128    48     
-128   48     
48     16     
528    400    
-464   32     
-64    -352   
256    -368   
-208   96     
96     16     
80     16     
-176   -64    
48     32     
-64    -256   
-672   192    
-288   -32    
48     80     
-272   48     
-128   192    
-48    64     
-112   -64    
-64    -224   
32     -16    
48     112    
-192   -64    
144    80     
-272   -112   
128    -16    
-144   160    
-64    0      
-160   16     
144    16     
-176   48     
-80    48     
-112   32     
-912   -304   
64     -208   
48     176    
160    144    
-144   -80    
112    80     
-32    -80    
-16    16     
16     0      
-96    -16    
96     112    
-224   -96    
144    -48    
-224   16     
96     16     
-128   16     
192    96     
-304   -80    
-80    48     
16     -96    
64     96     
-96    -16    
-64    0      
16     48     
64     80     
-176   32     
-32    -64    
-48    80     
-16    -48    
48     128    
48     -96    
-160   -192   
-704   -624   
-48    48     
288    160    
-64    32     
112    -32    
-48    -64    
16     48     
-16    -96    
-64    80     
0      16     
-128   0      
288    80     
-224   464    
80     144    
32     80     
-208   -160   
-144   -16    
128    -48    
176    192    
-80    176    
-16    -80    
48     0      
112    48     
-96    16     
-240   -48    
256    16     
-160   -160   
112    80     
-368   -144   
352    192    
-736   208    
208    272    
-1472  32     
16     80     
0      32     
-64    192    
64     208    
80     256    
-160   144    
-144   16     
-48    -160   
-288   -336   
16     -32    
-80    -32    
144    304    
-256   144    
0      112    
-1008  -128   
-16    16     
32     -48    
80     48     
16     16     
176    240    
-112   -64    
64     -48    
144    352    
-288   144    
-80    -608   
-208   928    
304    208    
-352   -112   
240    96     
-64    32     
32     416    
-128   368    
-48    -112   
128    624    
-80    48     
-192   -320   
16     192    
128    256    
-64    -128   
-176   -224   
-48    -128   
-128   -160   
-64    -560   
80     -144   
128    64     
-16    -224   
32     -16    
144    80     
-32    16     
48     80     
-144   -192   
288    64     
-112   80     
-48    -112   
32     48     
-400   -144   
80     -160   
-128   -240   
64     0      
-96    96     
160    64     
-80    96     
48     80     
-32    32     
176    64     
-160   80     
112    112    
80     64     
-128   -32    
64     96     
-16    48     
32     80     
-32    -160   
-16    16     
-48    -208   
208    -288   
32     16     
144    240    
-32    352    
-80    288    
80     32     
-272   -272   
80     -128   
-48    -32    
32     32     
-144   32     
160    208    
-128   0      
-160   -48    
80     -32    
144    128    
-32    64     
-48    64     
16     80     
-80    224    
32     48     
-192   -16    
64     160    
-112   -80    
144    128    
-192   -48    
208    64     
-112   192    
32     64     
48     -32    
32     800    
256    896    
32     448    
96     448    
0      -16    
-48    -48    
-96    48     
48     -96    
-16    -48    
208    352    
-384   -144   
16     -192   
0      144    
0      176    
80     -32    
32     96     
160    96     
-64    16     
384    656    
-112   272    
-176   -288   
208    -96    
32     944    
-112   -352   
96     -48    
16     512    
-96    -576   
192    448    
192    944    
64     144    
-128   -384   
-16    -176   
-32    224    
96     -160   
32     320    
32     32     
-64    80     
16     32     
32     0      
192    704    
-32    -48    
320    80     
176    560    
96     -784   
80     224    
-48    -48    
64     -192   
-32    -352   
16     -112   
-48    -128   
-176   -448   
256    -496   
-80    128    
304    304    
-112   272    
96     208    
0      -160   
80     176    
-144   -704   
-64    -112   
352    -16    
-208   -16    
304    128    
-32    80     
208    -96    
-272   80     
112    96     
-16    -16    
-224   -272   
288    -288   
-240   272    
416    -224   
-192   112    
304    -48    
0      32     
112    -2608  
112    48     
352    32     
-368   112    
240    -192   
-16    176    
176    128    
-64    96     
-144   -80    
272    0      
-48    48     
32     -64    
288    16     
32     -192   
0      -128   
-144   -784   
240    160    
-288   -672   
160    112    
-64    80     
272    224    
-224   320    
-32    64     
112    64     
64     -32    
352    176    
64     0      
0      80     
128    16     
-64    0      
144    -288   
144    160    
208    96     
-64    96     
-80    32     
112    64     
48     96     
128    128    
16     144    
80     64     
32     96     
80     -624   
-96    32     
48     -80    
32     -16    
0      -96    
-32    48     
48     -496   
48     96     
48     112    
368    160    
-240   48     
160    240    
-32    48     
144    -240   
48     64     
96     -80    
-16    80     
176    -48    
-16    32     
80     -160   
304    208    
-112   -240   
-16    64     
96     80     
208    -1184  
-272   0      
208    0      
-80    -1840  
208    -32    
32     -192   
176    48     
-16    64     
320    224    
-272   64     
160    -144   
-32    144    
112    48     
-32    -48    
-48    64     
0      -240   
160    -400   
-1280  -208   
48     -368   
-128   16     
496    -112   
-336   -48    
80     -384   
144    80     
-240   256    
96     144    
192    -176   
-112   64     
208    -176   
16     -48    
96     -448   
96     0      
-272   0      
96     32     
-64    -32    
224    -128   
-112   -160   
224    -480   
-160   -64    
208    240    
-32    -48    
32     -48    
48     0      
-80    -96    
320    368    
-352   144    
-32    -16    
176    64     
80     -128   
128    96     
128    -272   
112    0      
48     -96    
144    48     
48     -1168  
16     -64    
144    -16    
-96    -256   
272    -288   
-48    144    
192    -16    
-96    -112   
-112   -32    
112    -176   
-144   48     
112    -48    
-160   -16    
112    -144   
-192   -112   
304    -496   
-304   16     
32     -16    
32     0      
80     -48    
112    64     
-176   16     
-192   0      
272    32     
-48    48     
-48    -16    
48     48     
-448   -80    
240    -64    
-16    -80    
32     -240   
240    96     
208    16     
-160   144    
16     -64    
80     -192   
16     -32    
48     16     
0      64     
32     32     
0      48     
256    48     
-256   -16    
0      -112   
96     64     
160    64     
-64    -384   
-48    -784   
112    80     
80     -16    
32     -384   
-48    -112   
112    112    
0      208    
0      -80    
-288   -224   
0      -32    
-240   32     
16     -48    
32     -32    
80     -192   
64     64     
208    -32    
-64    96     
256    352    
320    -176   
-112   48     
80     192    
-256   -144   
192    -192   
-176   -144   
80     -48    
0      -208   
-80    80     
80     48     
192    -320   
256    240    
176    16     
-16    144    
-208   -240   
192    -96    
288    240    
-240   336    
96     64     
128    -48    
64     144    
176    64     
-80    16     
128    -256   
-160   96     
240    -240   
-272   0      
-272   -224   
-1088  48     
32     -160   
-1648  -64    
80     112    
-32    160    
-160   -96    
-192   -336   
592    800    
-304   272    
-240   -560   
-1312  -160   
32     544    
-16    -400   
64     160    
32     112    
-80    -80    
-96    0      
0      48     
-160   336    
-160   -160   
-80    -80    
128    112    
-208   -208   
-608   -128   
16     256    
-256   48     
-128   48     
240    -32    
-272   16     
-80    0      
-80    64     
-64    48     
-64    0      
80     64     
-432   -16    
-64    0      
-1664  -160   
112    -48    
160    192    
80     560    
0      144    
-64    -16    
224    -176   
-224   -64    
48     80     
16     80     
32     496    
336    608    
-304   368    
16     240    
-288   -176   
-656   -32    
32     432    
-128   128    
-64    48     
-208   -320   
128    -240   
-144   -272   
-112   -160   
160    -176   
-112   144    
112    80     
-96    16     
-96    -48    
-224   64     
224    96     
-208   64     
48     48     
-432   -48    
48     96     
-32    -48    
32     112    
48     64     
-16    16     
32     112    
-352   -16    
416    144    
-224   48     
128    208    
-128   -336   
192    -96    
-16    272    
16     144    
-944   -96    
64     176    
-112   -224   
256    -16    
-160   16     
-256   -160   
240    112    
-288   96     
176    16     
-208   112    
16     -48    
-48    -80    
-64    -176   
0      -128   
64     320    
-240   240    
224    464    
-320   16     
-32    464    
-144   -224   
112    -144   
-256   80     
48     -80    
64     288    
32     704    
288    1088   
-352   128    
-320   -1184  
16     288    
48     192    
-128   -80    
256    48     
-816   144    
-16    352    
64     -48    
272    544    
-288   -608   
-112   272    
128    96     
0      -48    
96     144    
-48    0      
144    176    
-128   -96    
48     -48    
0      -32    
-16    208    
96     128    
-240   -352   
112    16     
-112   64     
-16    -128   
-128   96     
0      48     
-80    0      
-176   208    
-128   -32    
-32    112    
-176   -160   
48     176    
-272   -176   
160    64     
128    144    
48     48     
0      80     
48     -128   
-144   272    
32     -128   
-80    -128   
48     0      
144    16     
-144   -64    
48     224    
0      144    
-48    208    
-112   -96    
80     -112   
144    320    
0      16     
-64    -80    
-16    -32    
80     144    
64     128    
64     176    
-48    -16    
64     160    
-304   64     
240    80     
48     128    
128    80     
-176   32     
16     112    
96     -32    
128    -48    
16     192    
336    160    
-208   208    
112    64     
96     96     
-64    -32    
128    96     
-96    -64    
48     -48    
-144   -288   
192    -224   
384    224    
-80    64     
-32    96     
-16    -32    
64     -16    
176    320    
80     144    
-32    -32    
240    208    
-80    -16    
-96    -128   
400    304    
480    160    
-224   48     
160    128    
112    64     
-128   -16    
256    64     
32     160    
48     32     
-16    -16    
224    80     
-272   48     
96     128    
-192   80     
112    -48    
-272   32     
144    128    
-16    0      
-128   -288   
112    0      
128    -48    
208    128    
64     48     
48     112    
-176   32     
16     80     
112    32     
-64    48     
-112   -16    
384    176    
-16    -192   
176    96     
-240   32     
64     -208   
0      -48    
80     32     
128    0      
0      240    
192    96     
-176   0      
224    144    
-64    80     
80     128    
176    160    
16     80     
112    288    
-304   -112   
144    64     
352    -176   
-128   -416   
80     -272   
64     160    
80     -16    
-80    96     
128    96     
-48    -32    
-80    16     
144    16     
176    256    
-208   32     
48     112    
128    128    
-32    96     
144    -192   
96     48     
-64    -528   
-32    48     
16     16     
272    16     
0      112    
-48    64     
-80    -144   
272    144    
-16    128    
160    176    
192    -48    
-128   -208   
320    208    
-64    -192   
-80    64     
160    -416   
-96    112    
80     -1344  
80     16     
144    -48    
0      -16    
32     -64    
112    32     
64     112    
32     160    
32     32     
80     -16    
176    144    
-96    0      
160    112    
0      -144   
80     80     
0      -224   
-32    160    
0      -400   
48     112    
16     80     
96     64     
-96    -32    
64     64     
160    128    
48     -32    
96     128    
-48    -16    
32     224    
96     -320   
-80    128    
80     -112   
-16    144    
96     -240   
0      192    
192    48     
-128   16     
16     -48    
0      128    
-80    160    
-16    -512   
160    -128   
-64    -272   
320    304    
0      -112   
320    256    
-48    -128   
272    96     
-160   -32    
96     144    
-64    -16    
32     96     
224    240    
-80    -176   
224    -96    
-48    -128   
448    320    
16     -144   
144    528    
176    -48    
0      16     
112    -160   
-16    -16    
-48    -176   
96     -208   
0      32     
64     -32    
-80    -896   
224    320    
-432   -1552  
256    -480   
16     800    
16     240    
160    -160   
-80    -112   
304    192    
16     -48    
288    -1504  
16     -64    
64     -48    
192    112    
-16    -384   
64     -400   
256    -48    
96     48     
176    -144   
48     96     
96     -64    
-112   -1328  
128    -400   
-128   -64    
64     -112   
-272   -112   
96     544    
-80    -256   
-288   -400   
-32    -416   
-192   144    
-80    0      
-208   -64    
240    160    
0      -432   
64     -32    
32     -576   
-144   80     
336    464    
-224   -16    
192    352    
-208   144    
-48    -160   
176    192    
-32    64     
368    208    
-672   -592   
240    -272   
-192   -176   
128    -16    
432    192    
-144   -832   
352    48     
-144   -1264  
-160   -176   
272    0      
-64    -96    
320    -176   
624    656    
-592   -144   
160    -704   
0      448    
144    80     
-304   -192   
224    176    
32     80     
-128   320    
128    -976   
-16    -384   
240    592    
-32    -688   
-48    16     
176    144    
240    656    
-80    64     
32     -160   
-64    80     
160    -144   
-432   -64    
240    32     
80     80     
-160   -96    
160    16     
-16    -608   
32     16     
112    -528   
64     144    
-64    176    
384    304    
-448   -272   
16     -656   
96     128    
32     272    
-16    272    
32     -80    
-1328  64     
32     -16    
-672   -32    
64     16     
176    416    
-64    -1488  
-80    32     
-96    -112   
48     -240   
80     320    
-176   112    
-64    -80    
160    128    
544    848    
-304   864    
-64    -48    
-176   -464   
-48    -272   
-256   -672   
256    336    
272    -336   
-80    -128   
-640   80     
208    16     
-144   96     
64     16     
-144   64     
32     -64    
-80    0      
48     32     
-192   -32    
512    144    
-160   336    
-112   -688   
80     224    
16     -176   
48     -96    
-32    -16    
-96    -224   
-32    -112   
64     48     
-64    224    
96     -128   
-48    0      
128    112    
-592   -112   
-80    -48    
128    160    
-784   -288   
80     144    
-192   160    
-512   -16    
-176   -96    
-208   -32    
-64    0      
-208   -624   
64     144    
144    0      
32     336    
144    304    
-416   48     
-1168  -736   
0      -304   
-272   -256   
-144   -496   
80     -32    
-144   -48    
-48    144    
-320   -176   
32     -160   
-384   -192   
224    16     
-96    0      
-192   -560   
16     -464   
224    32     
-176   -144   
96     16     
80     -64    
-144   -64    
64     32     
-192   -32    
64     48     
-112   64     
96     -16    
-272   -64    
-64    64     
-416   -112   
-224   16     
64     -16    
64     80     
-48    -96    
-32    0      
-224   -144   
80     240    
-144   -160   
112    112    
-32    96     
-16    64     
-48    32     
-48    80     
-32    0      
-528   64     
160    112    
-16    -128   
-48    192    
0      -96    
16     48     
-32    160    
96     224    
-240   160    
96     0      
-288   16     
96     32     
-208   48     
-16    0      
-16    192    
-144   -32    
96     96     
-416   -128   
64     -16    
-16    -224   
224    32     
-128   96     
496    544    
208    304    
-224   128    
272    208    
16     0      
80     -128   
-80    96     
128    144    
-224   0      
-32    -32    
-320   64     
80     176    
-192   112    
-48    -32    
-80    96     
-64    80     
-128   -192   
-160   -368   
80     -48    
0      -32    
48     128    
-64    96     
-16    160    
-144   -128   
16     64     
64     48     
-48    16     
-208   64     
336    144    
-256   224    
-144   144    
-96    144    
208    144    
-112   32     
-176   176    
48     128    
-208   -96    
-64    32     
176    64     
0      32     
-192   -208   
176    64     
240    208    
-288   0      
16     48     
0      224    
64     -112   
-96    96     
-32    32     
-48    272    
80     -80    
-192   32     
160    64     
-112   32     
96     48     
-384   -160   
80     144    
32     48     
-112   -48    
112    48     
32     160    
-64    48     
0      80     
64     160    
-128   112    
112    432    
176    192    
-80    32     
-32    -80    
80     96     
-64    48     
-96    32     
-80    80     
-16    48     
-32    112    
176    304    
-32    160    
-288   -16    
224    320    
-192   -16    
80     64     
-336   64     
192    96     
-176   -16    
64     32     
-160   -112   
16     32     
64     48     
48     64     
144    224    
32     112    
-96    0      
-32    64     
-16    64     
-160   -32    
16     -32    
-64    -48    
-144   -32    
-32    -112   
-16    96     
176    160    
-176   112    
80     16     
192    0      
-176   -16    
128    -48    
-48    48     
208    160    
48     -16    
-80    -32    
-16    48     
64     16     
208    176    
-96    80     
240    256    
-96    192    
-80    96     
48     48     
-48    16     
-64    -16    
48     -80    
-144   -400   
160    -272   
64     16     
-112   80     
-80    160    
0      48     
16     -48    
-80    -112   
-16    -160   
96     0      
48     80     
16     64     
16     48     
48     -48    
-16    -32    
32     32     
-112   32     
-144   -176   
32     -432   
128    128    
48     176    
64     80     
-64    -48    
48     -304   
-64    112    
112    192    
-64    128    
96     0      
-240   -624   
160    432    
16     112    
-176   -336   
288    -128   
0      80     
176    96     
-320   288    
352    16     
0      128    
-160   -240   
80     -32    
48     -144   
80     224    
192    32     
-80    192    
16     176    
368    256    
-192   160    
96     -160   
-128   368    
208    176    
-160   -16    
-32    -16    
128    -256   
224    -320   
48     -80    
-128   -1872  
112    96     
224    672    
-224   -160   
80     -64    
-144   96     
112    32     
-80    16     
272    256    
-272   80     
560    -112   
-160   176    
32     96     
80     -208   
64     144    
160    -112   
-160   -176   
208    -128   
224    128    
144    -64    
208    304    
-64    208    
288    -192   
32     224    
0      112    
256    -96    
32     -80    
160    -144   
64     32     
-144   -352   
368    192    
-272   576    
-32    -304   
160    224    
-128   -208   
160    0      
-32    16     
352    336    
-208   128    
112    96     
96     48     
512    400    
-576   -608   
-48    144    
192    -144   
80     32     
16     96     
-128   -560   
160    80     
192    -768   
0      128    
-48    176    
224    -112   
-208   32     
16     -16    
416    48     
-48    560    
-208   -992   
368    -848   
96     528    
16     304    
32     -144   
-272   -304   
384    -208   
-176   384    
-96    48     
160    -304   
-128   224    
160    -464   
-288   -320   
256    -224   
-448   -464   
512    -960   
-16    496    
48     -64    
144    -80    
64     304    
176    704    
16     -48    
-160   -368   
-224   -160   
352    -16    
-112   288    
352    16     
-160   48     
144    -1072  
-32    32     
48     -240   
64     128    
176    -32    
240    144    
0      240    
208    -208   
-16    -176   
-32    -128   
-16    -1456  
256    -304   
64     0      
-160   -464   
432    192    
-128   -464   
224    -288   
48     -720   
112    -80    
80     0      
144    -32    
-16    96     
256    480    
-96    -1600  
144    -96    
-80    224    
336    -96    
-176   -160   
0      -48    
-496   -288   
48     -480   
0      -112   
-32    -176   
32     32     
208    -688   
-112   -160   
96     64     
48     32     
112    -16    
80     64     
-16    -240   
32     96     
80     128    
-16    -48    
-80    192    
48     -16    
64     96     
-16    -144   
192    -64    
-96    -224   
256    144    
48     -128   
-128   224    
-48    -64    
-288   -112   
368    320    
-48    272    
-144   -48    
112    80     
-96    16     
0      -80    
128    -128   
64     -112   
48     -80    
96     96     
64     32     
208    -144   
-160   128    
32     -80    
-32    192    
144    -80    
16     -64    
64     32     
0      32     
-48    -32    
-32    -256   
48     -144   
-80    -16    
208    48     
-48    -128   
80     64     
-64    -608   
320    320    
-192   -224   
-64    160    
-16    -176   
192    -80    
48     64     
32     64     
-208   -64    
80     -48    
-336   32     
48     80     
-336   288    
208    -304   
-224   -272   
96     -576   
-32    32     
48     -144   
48     16     
-96    48     
96     -192   
-80    0      
-96    -48    
-64    144    
96     96     
-208   48     
80     -160   
-768   -48    
-48    -96    
80     -32    
128    32     
176    144    
80     -320   
96     128    
-80    -96    
224    -112   
-384   -16    
192    16     
-288   80     
272    336    
-144   208    
-224   80     
64     -96    
-16    144    
80     112    
-224   32     
96     16     
64     -144   
32     80     
-16    112    
-192   -64    
32     -80    
144    0      
-96    -144   
-112   -336   
-544   -320   
320    -80    
-160   -224   
112    -256   
96     -16    
64     -496   
-96    -64    
112    -560   
0      -16    
112    64     
-64    -144   
-336   48     
96     64     
-320   32     
-16    176    
-560   -16    
64     176    
-144   240    
-944   -224   
352    -80    
-1680  -288   
256    48     
32     112    
-80    112    
128    0      
-480   112    
-64    -80    
-32    16     
0      -96    
32     16     
160    112    
-64    -64    
144    112    
-256   -112   
128    144    
-256   32     
16     96     
144    64     
-240   -80    
160    -128   
-48    -112   
-80    64     
-16    64     
112    0      
16     208    
-576   64     
-208   -176   
0      0      
-112   -432   
128    160    
-192   -32    
-80    -16    
-80    48     
0      -16    
-48    48     
0      80     
-128   112    
144    112    
-144   128    
-656   -32    
-96    16     
-16    -16    
176    176    
-32    -144   
16     16     
-48    -64    
0      48     
-16    -16    
-176   -16    
48     128    
-16    48     
48     80     
-128   0      
-32    48     
-112   64     
-288   16     
32     -80    
128    288    
64     16     
0      128    
-160   16     
80     0      
80     64     
0      32     
-48    32     
-224   -32    
-48    112    
80     -48    
-80    48     
208    320    
-224   240    
-208   144    
-208   256    
0      -144   
-272   16     
-32    0      
112    64     
-32    64     
-288   0      
-48    16     
-48    16     
32     80     
32     64     
128    -64    
-224   -96    
-80    -16    
-224   528    
-160   -448   
-32    -32    
192    528    
-112   336    
0      16     
0      80     
-32    0      
-48    160    
-48    -288   
64     96     
-112   64     
-32    -160   
-272   -368   
-16    480    
-432   -224   
128    48     
96     -160   
16     -16    
80     80     
288    544    
-416   -496   
224    192    
64     64     
-48    16     
80     16     
-96    48     
96     240    
-256   -208   
208    128    
256    608    
80     544    
-144   -576   
-96    -992   
160    80     
160    720    
128    96     
-48    -32    
32     48     
-80    0      
80     -16    
-336   -400   
144    64     
64     192    
144    128    
-176   -48    
-16    48     
32     80     
0      96     
320    256    
-96    144    
-128   0      
-144   16     
-16    -144   
-80    0      
-32    16     
-160   32     
80     496    
160    176    
80     112    
-592   -112   
-560   -1136  
480    -320   
-288   448    
288    176    
16     368    
224    336    
-256   176    
288    208    
-80    32     
-80    272    
64     -96    
0      -208   
-32    -208   
-256   -16    
16     192    
-144   -16    
336    -112   
-416   -112   
272    -16    
-208   240    
64     672    
32     -80    
-32    -448   
112    144    
0      64     
-192   -32    
128    -112   
-416   -32    
144    16     
80     512    
-64    384    
-64    -32    
-128   -320   
112    16     
-256   -16    
320    -272   
144    384    
-32    208    
64     64     
-128   240    
16     -272   
-224   -288   
64     208    
-176   -304   
112    128    
-96    128    
32     -240   
112    -336   
48     352    
-208   144    
-112   176    
240    832    
-160   -192   
-48    -32    
16     -48    
48     176    
80     -272   
432    128    
-192   320    
192    80     
-16    480    
96     -688   
272    304    
240    320    
0      448    
48     -112   
144    48     
32     -64    
240    384    
-192   64     
144    -544   
48     192    
-80    160    
176    -512   
-48    32     
80     48     
192    -112   
80     -176   
48     -96    
-240   176    
304    -64    
0      -96    
-32    -160   
16     -256   
48     -144   
-32    144    
-144   -160   
-160   112    
96     -384   
32     144    
144    112    
16     96     
64     80     
48     208    
336    480    
-112   704    
64     496    
160    128    
48     0      
-112   128    
-144   208    
-48    -320   
-80    512    
32     -176   
0      80     
240    -1840  
-128   -448   
-64    144    
288    272    
64     368    
64     -112   
176    80     
-16    -48    
-64    144    
32     32     
96     64     
0      304    
48     416    
160    240    
128    976    
304    -240   
-144   224    
96     -368   
-144   -80    
0      -16    
-32    64     
-32    96     
64     -96    
-112   0      
256    256    
80     128    
48     -208   
48     144    
-96    -304   
96     -224   
0      -448   
112    80     
32     -832   
-80    112    
64     32     
128    -112   
16     32     
192    128    
-16    -48    
48     144    
128    176    
-192   -304   
32     -16    
176    -80    
-80    -208   
0      -144   
192    192    
-128   -336   
192    176    
-48    -832   
32     176    
-32    144    
32     176    
80     -16    
32     176    
112    112    
80     -48    
64     32     
32     -112   
112    64     
48     -96    
-32    32     
64     -32    
144    112    
224    128    
-176   96     
96     16     
96     64     
96     -16    
-48    -240   
176    32     
-32    -240   
64     16     
64     -144   
-80    128    
208    -96    
48     80     
48     16     
96     112    
-208   0      
208    176    
240    480    
-16    96     
-16    -128   
48     -336   
32     -416   
48     -128   
16     16     
192    -64    
-128   80     
64     -176   
64     80     
240    -208   
-176   -400   
208    16     
32     -1296  
-48    64     
-32    -416   
0      -144   
96     -64    
0      -304   
96     16     
-176   -1648  
272    0      
96     96     
-32    112    
48     -80    
-112   -192   
80     -368   
0      -112   
32     -320   
-80    16     
16     -48    
304    224    
-800   -192   
336    -416   
-224   80     
-16    -144   
-48    -112   
48     -576   
64     -176   
0      128    
0      -144   
-112   16     
592    288    
-80    -64    
128    -128   
-192   -64    
144    -16    
-560   144    
-96    112    
64     -16    
64     -48    
0      -64    
-48    -160   
-64    -80    
144    96     
-112   48     
80     -16    
48     -16    
-48    -112   
112    -48    
-304   -224   
464    80     
-208   -48    
208    -80    
144    16     
176    -176   
-160   -160   
176    32     
-352   -48    
320    -432   
-208   -32    
80     -176   
0      128    
-64    -80    
160    96     
-256   32     
96     0      
-96    80     
144    -48    
-656   -48    
128    -224   
-32    208    
32     -80    
-96    32     
96     -848   
-144   48     
-48    -384   
272    208    
-96    16     
64     128    
-192   0      
96     -176   
-272   -48    
192    32     
-416   -32    
160    176    
-944   128    
112    176    
176    16     
208    -272   
80     32     
144    -224   
112    64     
-176   64     
-32    -80    
-64    -48    
-128   -208   
0      -96    
-128   -144   
-240   64     
32     -112   
-720   96     
176    -288   
-144   192    
112    -80    
-32    0      
96     -608   
128    -128   
-192   80     
208    32     
-48    -160   
96     96     
-240   -208   
64     -256   
-592   32     
96     -64    
-384   -48    
288    -272   
-304   -432   
256    112    
-16    176    
-96    -16    
-32    -640   
-96    176    
48     256    
-80    -16    
96     0      
0      48     
16     -32    
80     80     
-224   -32    
176    64     
96     -32    
32     112    
288    -272   
16     80     
-320   -288   
-592   112    
-64    304    
-352   160    
64     640    
-128   -208   
-32    -176   
96     0      
-144   48     
-16    -128   
160    16     
-352   16     
112    -48    
-176   -80    
-32    272    
272    144    
-192   256    
112    32     
-1200  32     
-128   32     
-1792  -16    
-144   144    
176    16     
-48    176    
208    -112   
-80    -32    
-48    -320   
64     -32    
32     -80    
416    384    
-320   432    
-16    -144   
32     -32    
368    656    
-64    784    
-272   256    
96     368    
208    496    
-400   -112   
-176   -272   
80     32     
-176   -96    
80     16     
-128   0      
0      16     
-192   -32    
112    0      
-48    0      
64     48     
112    192    
-160   -48    
-256   64     
160    176    
-272   -288   
112    -400   
-32    80     
112    -144   
-32    -240   
160    -144   
-32    -48    
-128   -192   
-16    80     
-352   -544   
544    -976   
-48    -176   
272    160    
-64    -64    
288    368    
-32    352    
432    496    
0      496    
-240   128    
192    0      
-528   -576   
448    -160   
-192   384    
-112   352    
336    -144   
-80    256    
-160   -64    
-32    -368   
80     -176   
48     544    
592    672    
-1104  -288   
-16    -480   
-160   288    
-112   -16    
-80    32     
-96    128    
80     96     
48     64     
144    432    
192    608    
48     1216   
-48    -240   
32     -400   
16     112    
-16    96     
-1120  -240   
32     -160   
128    -352   
-272   -640   
-208   -272   
64     80     
144    1408   
176    304    
-176   160    
-80    48     
-80    208    
48     432    
32     368    
-544   -368   
160    64     
-752   160    
16     144    
16     80     
112    208    
-112   352    
240    272    
-176   -112   
32     96     
64     16     
80     -96    
176    -128   
-80    -64    
112    32     
-224   -16    
112    -32    
-208   -128   
32     -112   
-80    -16    
160    48     
-80    -32    
-48    -144   
80     -192   
80     112    
128    144    
-112   0      
-32    -176   
-160   -64    
240    144    
-320   64     
304    304    
-400   -48    
0      -16    
112    16     
16     0      
-32    -48    
32     48     
-64    -80    
-128   192    
192    384    
-448   -48    
-64    64     
240    96     
-80    176    
-256   0      
96     240    
-112   -160   
-48    32     
96     96     
0      16     
-16    48     
192    64     
-144   0      
48     -16    
176    -16    
64     64     
144    288    
-112   80     
-48    32     
-112   -48    
208    192    
-240   32     
64     64     
64     96     
32     64     
112    96     
-32    96     
96     288    
0      96     
128    80     
16     336    
80     16     
-240   -80    
192    128    
-160   -144   
32     32     
144    176    
320    192    
-208   0      
160    48     
16     16     
64     64     
-32    64     
112    32     
-16    32     
-112   -64    
-16    64     
-112   -48    
144    48     
-96    32     
-16    224    
96     16     
-16    128    
160    64     
-224   48     
32     16     
144    0      
64     96     
0      0      
-224   0      
112    16     
16     112    
32     128    
80     128    
16     96     
224    480    
-240   192    
0      80     
160    32     
0      32     
-16    80     
128    96     
112    96     
-208   48     
48     112    
96     64     
-16    32     
-80    -64    
240    128    
-128   -240   
160    -192   
-96    48     
0      32     
-64    64     
224    80     
-128   128    
-144   16     
96     96     
112    144    
96     48     
-240   -288   
400    160    
-208   96     
-80    -192   
224    96     
-48    -32    
-64    -64    
272    -768   
-64    -64    
208    -32    
64     144    
-64    0      
48     80     
160    -48    
0      176    
-128   16     
-32    128    
144    32     
-112   64     
272    32     
-128   -240   
240    32     
64     -672   
-32    48     
-48    -16    
64     64     
32     144    
128    144    
-48    -80    
-64    16     
144    64     
-32    128    
80     -32    
32     48     
144    96     
-32    64     
96     32     
0      -1280  
224    160    
-80    -880   
144    272    
-128   48     
144    -48    
-80    16     
128    144    
-16    0      
16     64     
192    96     
-32    -144   
-48    -352   
-64    -336   
112    112    
0      -48    
-96    80     
112    -512   
16     112    
16     48     
48     80     
144    64     
32     80     
48     16     
96     80     
144    112    
64     -80    
0      48     
288    240    
-96    -32    
64     -208   
96     176    
-176   -304   
224    128    
64     96     
-80    64     
-96    -48    
272    48     
-208   16     
480    -352   
-384   112    
464    -288   
-224   -48    
272    -160   
-144   -16    
272    -512   
336    64     
64     -192   
-16    208    
-112   -96    
176    -16    
48     64     
208    160    
-64    128    
192    112    
-96    128    
176    -144   
176    224    
-176   -112   
80     112    
80     -288   
64     128    
32     -192   
-32    80     
144    32     
-128   -2672  
160    -176   
-48    -2768  
192    -752   
-144   80     
208    128    
-112   208    
0      -960   
96     160    
288    304    
-64    0      
-48    -320   
0      -112   
80     352    
64     0      
-64    -816   
-16    48     
-528   16     
160    -448   
-16    64     
176    -576   
-96    -32    
96     -800   
-160   64     
176    -224   
16     -112   
160    160    
-96    -112   
160    -240   
-32    80     
80     -144   
-32    128    
-336   304    
-48    -80    
-48    -160   
80     32     
176    -80    
-48    64     
128    -32    
80     -176   
80     -80    
0      32     
64     16     
144    0      
16     48     
48     -64    
-16    -128   
-160   16     
48     -144   
-592   0      
64     -64    
64     32     
64     176    
160    144    
32     -896   
-16    144    
192    -160   
-112   64     
80     16     
0      -32    
160    -96    
48     -144   
-208   64     
96     -16    
-272   -80    
96     -32    
16     -96    
-64    -288   
160    -336   
48     -304   
48     -32    
-144   -1136  
32     16     
48     -192   
-48    -16    
-32    -64    
48     80     
-16    112    
208    -16    
-144   -96    
96     -48    
-480   -16    
192    -48    
32     16     
0      -96    
80     -128   
-224   -928   
144    144    
-160   0      
0      -256   
-160   -48    
80     -16    
-80    -80    
96     0      
-48    -32    
96     64     
-432   -80    
128    80     
-64    0      
192    -48    
-64    16     
16     -400   
112    48     
-240   -176   
384    -400   
-64    16     
416    240    
-112   352    
112    112    
-176   -48    
-80    -16    
-112   96     
-32    192    
-288   112    
656    400    
-496   1136   
-320   -960   
336    -704   
112    0      
-32    -208   
-144   -160   
144    144    
-256   0      
80     -16    
-176   -416   
-176   -352   
32     256    
-16    -112   
160    80     
48     -144   
176    496    
-176   -256   
192    -224   
16     224    
-48    -64    
-16    96     
-80    80     
128    48     
-64    16     
48     -16    
32     -144   
-32    -64    
-112   -208   
16     144    
80     -32    
432    720    
-1072  352    
128    -80    
-192   -48    
-1264  -48    
-224   -368   
-256   -192   
32     -96    
64     -48    
-352   -176   
176    -160   
-224   -240   
80     -400   
-192   224    
-320   -80    
-208   48     
0      -144   
-96    96     
624    352    
-416   272    
400    384    
-736   -160   
48     -16    
-720   96     
-176   0      
-368   -208   
256    -16    
-240   48     
96     -112   
-560   -320   
592    48     
-128   128    
112    48     
-96    80     
96     16     
-96    48     
-256   32     
-80    32     
-496   -128   
16     16     
144    32     
16     80     
176    -64    
-208   64     
80     -64    
16     -16    
192    -96    
-16    80     
64     48     
-224   -144   
208    176    
-560   0      
128    80     
-160   16     
64     0      
-864   0      
-240   -208   
-32    -160   
16     144    
-240   -240   
224    0      
-16    64     
144    32     
48     48     
32     160    
-128   128    
-128   48     
-32    -64    
16     16     
16     -32    
-272   -64    
192    128    
-144   16     
0      0      
16     0      
48     -48    
-16    64     
-128   -112   
96     16     
208    128    
-96    -64    
-64    16     
-96    112    
-96    -112   
-16    144    
-64    16     
-32    80     
-288   96     
32     64     
-256   -144   
80     -16    
-208   64     
48     80     
-48    128    
-48    48     
-192   128    
144    80     
-192   16     
-48    16     
48     96     
-32    -48    
-16    -32    
-240   -64    
-96    112    
-112   -256   
-48    -32    
160    64     
-64    144    
-80    96     
64     208    
64     48     
-176   0      
272    112    
-80    -80    
-16    48     
-272   -176   
96     32     
-208   -16    
144    176    
-160   144    
-48    48     
144    112    
-96    16     
128    160    
-80    64     
0      160    
-80    32     
64     160    
-48    -32    
80     96     
-80    -64    
32     128    
-112   -64    
144    64     
-80    48     
-80    64     
112    -16    
-64    -96    
240    240    
-272   80     
80     -48    
-48    0      
48     48     
-176   -16    
176    144    
-96    0      
64     96     
-160   32     
-112   48     
176    32     
-64    32     
-48    16     
16     112    
64     64     
-64    -48    
176    16     
-128   -64    
160    64     
-288   -80    
368    16     
80     176    
48     112    
-16    16     
-112   -48    
112    -32    
-80    -80    
80     -16    
16     0      
-128   48     
96     64     
-112   96     
128    112    
-48    32     
-96    0      
224    240    
-320   144    
112    160    
-224   48     
192    -16    
0      192    
128    32     
-16    80     
48     0      
32     112    
240    304    
-208   240    
-16    48     
16     112    
-192   -112   
288    192    
-240   -48    
96     96     
48     48     
144    160    
-96    -32    
144    144    
32     160    
32     32     
-320   64     
560    16     
80     48     
80     -128   
-160   32     
336    256    
-176   320    
-16    80     
0      -80    
0      80     
48     -176   
48     96     
192    112    
-16    128    
64     16     
16     80     
128    80     
256    240    
-16    432    
-208   160    
-272   -144   
512    -16    
112    160    
208    -480   
-144   16     
256    224    
96     64     
80     16     
-80    -96    
256    224    
-48    112    
96     480    
192    448    
-32    160    
-160   96     
0      -96    
-16    -16    
-160   16     
-96    -1072  
128    -400   
112    -16    
176    -16    
128    112    
80     160    
-32    80     
160    112    
48     160    
16     160    
-112   176    
-32    -80    
160    -144   
-32    128    
-32    -208   
0      -48    
0      64     
176    320    
32     432    
96     16     
-208   0      
-32    -32    
32     112    
32     -48    
48     96     
32     48     
208    320    
-144   320    
-80    -464   
368    592    
-384   80     
48     -480   
112    -752   
32     176    
-48    304    
64     -16    
96     96     
80     112    
-16    64     
144    176    
-208   -32    
160    -80    
16     48     
192    0      
64     128    
16     -160   
16     48     
128    -192   
160    208    
-96    -224   
0      -192   
80     -272   
144    192    
-16    320    
-112   208    
-80    -16    
176    128    
32     48     
-64    48     
240    80     
-16    -96    
-16    64     
160    48     
16     64     
80     -240   
-32    80     
64     32     
240    128    
-176   400    
208    432    
96     240    
-80    32     
48     144    
-48    -224   
48     48     
48     -624   
48     48     
-16    -208   
-16    0      
16     -432   
-144   48     
80     32     
32     96     
-16    80     
64     144    
-32    -80    
64     -368   
48     144    
48     -144   
112    128    
80     16     
176    448    
48     368    
-64    -16    
-64    -2544  
-32    -16    
32     48     
80     64     
32     -16    
144    336    
880    992    
-192   1088   
304    976    
64     576    
192    384    
64     -240   
32     -64    
64     -176   
0      208    
112    32     
96     -144   
-224   128    
656    32     
-608   -272   
-416   -768   
0      -1216  
256    32     
-32    -336   
208    0      
-320   -624   
464    -976   
-16    992    
16     -96    
-16    -144   
160    80     
112    -560   
-16    256    
-16    -320   
208    256    
-448   336    
0      224    
96     -224   
-240   -624   
192    208    
-16    -576   
-16    -80    
160    -96    
80     -192   
64     -176   
48     96     
144    -352   
80     80     
-16    96     
240    224    
-32    -64    
144    -32    
0      0      
-96    -160   
48     16     
32     -32    
16     32     
-16    -432   
176    -144   
64     -112   
-16    80     
208    224    
-128   192    
32     64     
144    -128   
208    -32    
-224   -400   
-688   -784   
-128   -352   
496    272    
0      112    
128    80     
32     -576   
128    96     
240    304    
-176   32     
336    -80    
-80    144    
304    -16    
-80    0      
-144   -112   
128    96     
-128   32     
16     -32    
128    32     
96     -48    
-32    -160   
384    -48    
256    144    
-80    -304   
96     80     
160    -80    
-80    96     
-272   -240   
768    -112   
-560   128    
656    -112   
-384   160    
496    -96    
-272   32     
112    -144   
-16    48     
-48    -64    
32     32     
320    -16    
-96    48     
160    0      
48     -176   
240    96     
-240   32     
32     80     
32     -64    
-208   64     
160    -144   
-144   -32    
80     -48    
-672   32     
176    -256   
-80    32     
112    -416   
160    80     
-96    -464   
224    -16    
-224   32     
-128   -96    
-160   128    
112    -128   
-352   -16    
112    32     
-96    96     
0      32     
-16    0      
112    16     
96     80     
48     -144   
80     32     
32     64     
0      -112   
-64    -32    
352    -48    
-192   16     
144    -16    
-32    16     
-160   -16    
64     112    
-304   -288   
-288   32     
80     -256   
80     80     
144    -64    
80     64     
64     32     
-80    -128   
16     32     
64     48     
-96    48     
144    -16    
-96    80     
176    -176   
-304   -112   
-16    -272   
-64    192    
-624   -16    
-16    144    
-496   -240   
-32    64     
240    208    
-944   64     
-80    64     
-112   64     
32     48     
-64    48     
0      48     
-96    32     
-208   -208   
-208   -160   
128    160    
-144   240    
16     64     
-528   -224   
96     0      
0      256    
-160   64     
-16    64     
-112   -32    
-48    -80    
-160   96     
-272   48     
-32    80     
64     48     
-112   -64    
96     96     
80     112    
32     112    
-80    16     
-80    -16    
32     32     
-176   48     
-96    -32    
-128   -32    
-112   -32    
-192   32     
32     48     
-896   32     
-16    64     
-208   -160   
192    32     
-176   -176   
128    128    
-96    144    
144    96     
-256   16     
128    96     
-160   112    
192    112    
-176   -64    
48     64     
16     112    
-640   -128   
48     112    
-224   -224   
288    -48    
-112   -16    
160    96     
-288   64     
-64    -96    
112    80     
-160   32     
176    64     
-128   0      
160    160    
-80    112    
-160   304    
-112   48     
-144   -48    
96     96     
304    336    
-240   160    
-16    16     
-240   -96    
64     -64    
0      256    
112    96     
-272   16     
208    96     
-544   32     
48     -304   
-96    80     
-112   64     
-48    128    
-1216  16     
224    48     
-96    48     
80     -16    
32     64     
-80    -288   
272    -112   
96     -48    
48     96     
-48    80     
-80    64     
32     48     
48     288    
-80    144    
0      128    
-320   304    
-96    480    
-128   400    
80     64     
-128   224    
96     672    
192    432    
-256   -288   
288    112    
-304   16     
112    208    
-304   -48    
128    80     
-224   -112   
32     48     
-464   -112   
-16    -192   
192    192    
160    608    
-48    -16    
0      -480   
-96    -320   
256    16     
-176   16     
48     128    
160    96     
-176   288    
336    400    
-368   -144   
272    64     
-400   -240   
240    -48    
16     128    
-16    208    
288    -48    
-320   -224   
416    16     
32     976    
-224   80     
144    -576   
-48    416    
-144   -416   
96     304    
-176   96     
48     -128   
64     464    
-80    176    
-48    -192   
-112   -304   
-240   192    
592    -144   
-192   1056   
-16    -208   
-160   -448   
-48    0      
-80    144    
-48    48     
-32    96     
-96    -32    
-80    144    
176    96     
-176   16     
48     32     
112    192    
-224   80     
384    240    
-256   416    
320    -80    
-16    368    
-96    400    
80     -336   
-320   -160   
304    -208   
-320   304    
-16    -80    
176    -48    
-16    176    
-48    48     
304    224    
-176   144    
64     128    
16     48     
-16    64     
32     16     
-128   0      
80     64     
-64    -16    
208    160    
-256   -112   
-32    -128   
0      32     
16     112    
80     176    
-320   304    
400    80     
-448   -48    
432    96     
-16    80     
-80    64     
16     48     
96     112    
-96    -16    
48     96     
48     64     
0      96     
-320   64     
464    -80    
-144   192    
208    0      
-32    656    
64     272    
96     224    
16     448    
80     48     
-176   208    
272    240    
-304   -208   
80     -80    
112    112    
0      -1168  
-128   -224   
32     -576   
176    480    
-32    736    
96     -544   
-16    224    
272    128    
-192   -32    
160    256    
80     16     
-48    -16    
48     -16    
96     80     
-16    -288   
-32    -1536  
-32    240    
-64    -320   
272    192    
112    336    
-208   -496   
368    96     
32     368    
-48    -160   
192    -64    
32     48     
80     224    
64     -80    
64     -288   
-32    -192   
-64    48     
0      -224   
96     -1952  
-144   -496   
112    -64    
16     448    
160    416    
-160   -224   
192    160    
-64    480    
-32    208    
272    -32    
96     48     
32     -144   
-160   -256   
80     -224   
96     176    
-64    -336   
192    320    
-160   80     
-48    224    
128    -224   
-64    -64    
48     -160   
0      -16    
144    16     
80     224    
32     160    
112    192    
16     -16    
-16    112    
48     112    
-112   -464   
-64    -32    
128    -304   
-128   -256   
-112   -208   
160    64     
-128   128    
-96    -112   
288    192    
-160   32     
336    64     
-192   -32    
176    16     
-32    -128   
-16    -16    
176    -464   
-192   96     
64     -160   
448    208    
-64    -48    
400    96     
-176   96     
416    368    
-48    272    
64     0      
0      48     
-96    -352   
32     0      
96     -272   
-48    -128   
64     112    
-80    128    
64     -640   
0      96     
128    112    
160    336    
-160   160    
224    48     
-192   96     
336    -48    
-112   80     
240    -304   
48     96     
32     48     
96     192    
-240   -32    
336    144    
-400   -32    
384    240    
-288   176    
144    128    
-192   0      
16     -1008  
144    -864   
-112   -528   
256    -64    
-208   -288   
-64    0      
48     -16    
-144   64     
32     -32    
208    -16    
64     0      
-64    96     
96     -64    
64     -656   
-240   -256   
-976   -64    
-80    -384   
144    -80    
64     80     
144    -128   
48     64     
208    -192   
48     128    
144    -32    
-16    -16    
48     -32    
0      -256   
0      128    
160    -240   
-80    16     
64     -16    
80     -176   
-96    -128   
160    -160   
16     -32    
160    -400   
48     96     
288    320    
-64    16     
0      0      
80     -16    
80     -96    
224    112    
-48    32     
16     -80    
-80    16     
96     -32    
-112   -96    
-32    -240   
-16    -128   
96     -64    
160    -128   
0      -736   
224    32     
-224   -224   
240    288    
-192   -96    
128    96     
-80    -16    
112    -16    
-80    32     
-144   0      
-768   0      
-96    0      
-176   -288   
224    -224   
192    112    
-144   -576   
0      -32    
160    -1056  
0      352    
-16    -32    
96     128    
-48    -112   
272    32     
-192   -48    
32     -64    
-80    32     
80     -32    
-48    96     
-80    -384   
-64    -96    
80     -208   
80     96     
-96    -992   
80     64     
32     48     
48     80     
-80    -48    
48     -96    
-16    -32    
-48    -64    
-48    0      
128    -80    
-1184  48     
-48    -128   
-592   -32    
144    -192   
48     80     
160    16     
-16    96     
-128   0      
32     32     
96     48     
-16    -48    
-48    -80    
0      -16    
-544   -432   
256    -304   
-768   -304   
-32    -96    
176    32     
-16    -64    
352    144    
-144   -176   
176    144    
48     -720   
112    -64    
16     80     
224    80     
-320   -208   
112    -272   
-336   112    
352    32     
-256   -192   
160    -512   
-16    -128   
96     -224   
192    256    
0      -224   
64     48     
-48    -112   
464    464    
-384   -96    
-16    -224   
-256   480    
128    -544   
-208   80     
0      240    
-16    176    
112    -432   
-992   -176   
192    -48    
-160   144    
-176   -544   
16     48     
16     208    
-1200  16     
-144   64     
304    160    
-192   48     
-128   -112   
176    128    
64     -144   
-176   -480   
128    -16    
32     240    
-1088  -176   
224    304    
-192   32     
-112   -192   
-192   -160   
-368   -416   
160    -144   
-528   224    
64     304    
-112   0      
-80    32     
32     128    
-240   -96    
-208   -256   
176    288    
384    672    
-336   -384   
-48    -576   
-208   192    
-80    -112   
-144   16     
-192   -80    
-448   -384   
240    64     
-480   -208   
-64    -32    
-288   -768   
1024   448    
-480   848    
304    -448   
-96    -80    
240    416    
-272   272    
16     64     
192    -48    
-224   528    
192    -464   
-384   -48    
16     288    
-544   -144   
176    192    
-560   -48    
304    448    
-560   -112   
48     -32    
-272   144    
192    80     
-32    544    
-480   -160   
336    -400   
-208   704    
-32    16     
-176   -272   
-192   272    
-80    -160   
64     624    
-304   -432   
-16    160    
-176   -80    
-48    -192   
160    -208   
-48    0      
144    144    
-80    32     
-32    16     
-272   -16    
-32    96     
80     48     
-64    64     
0      0      
-80    -112   
-112   272    
0      32     
-16    -192   
384    368    
0      -512   
-128   400    
80     -80    
-144   -320   
-64    224    
176    128    
-80    336    
-80    -32    
-144   -128   
16     -96    
-32    784    
64     -128   
-64    -128   
-256   304    
16     -96    
-64    32     
160    32     
-80    -208   
64     688    
16     240    
-112   -160   
-16    -128   
-160   -784   
0      352    
192    176    
-48    128    
80     192    
-64    80     
-496   -64    
-160   48     
96     0      
-144   16     
16     32     
0      48     
80     48     
-112   32     
304    96     
-416   -32    
16     -288   
-400   -208   
448    -16    
-336   416    
64     -96    
-560   -32    
-96    80     
160    240    
-224   192    
32     -128   
-80    32     
48     208    
0      32     
-144   112    
32     -224   
64     -128   
-160   -272   
32     -32    
80     48     
176    288    
-272   16     
176    464    
128    192    
-128   96     
80     352    
32     80     
-32    112    
-128   80     
112    80     
-32    80     
-80    448    
32     528    
-384   160    
160    0      
240    256    
-112   -80    
-48    -112   
-48    -96    
-64    -64    
-112   0      
112    80     
80     80     
-96    -96    
16     32     
-16    80     
-80    80     
-208   32     
256    208    
-256   80     
-64    112    
-160   16     
96     16     
-64    0      
224    224    
-80    144    
16     80     
112    48     
-48    112    
0      112    
336    288    
-416   256    
-112   -32    
-112   176    
96     -96    
0      -96    
32     96     
96     144    
-80    128    
-16    96     
80     96     
-144   -32    
96     48     
-112   32     
64     48     
-112   64     
96     160    
0      -80    
64     16     
-16    -32    
80     48     
-64    32     
80     32     
208    288    
-176   112    
16     0      
176    112    
-16    96     
80     48     
112    112    
-32    16     
96     112    
-208   0      
416    560    
-416   144    
16     128    
160    48     
16     0      
368    -96    
-224   -208   
128    -96    
16     224    
96     96     
-112   0      
96     192    
-32    96     
-96    128    
32     112    
128    160    
80     64     
-112   -32    
128    176    
-144   144    
80     320    
144    240    
352    224    
224    160    
0      64     
-176   64     
80     160    
-16    16     
32     -96    
64     80     
-208   -272   
-416   -144   
256    -512   
96     128    
-16    144    
-16    96     
-80    128    
176    0      
-128   -80    
128    96     
-80    -176   
48     -48    
32     160    
384    128    
128    80     
336    80     
-320   96     
112    -64    
64     112    
288    -1392  
-160   48     
176    160    
0      80     
64     -80    
48     16     
-32    -64    
368    112    
-48    112    
128    -128   
-64    -16    
256    -80    
-240   80     
80     32     
80     96     
-48    -528   
96     -48    
224    272    
160    96     
-16    0      
-32    -160   
-16    64     
176    80     
-288   64     
128    -80    
-160   96     
64     -128   
128    0      
-48    0      
128    32     
-144   -1232  
224    32     
0      -208   
112    80     
16     -16    
-64    96     
96     80     
-48    32     
176    64     
-48    32     
16     176    
-32    -192   
64     48     
64     -176   
128    176    
96     -224   
-16    64     
-48    -320   
176    48     
-160   0      
144    -16    
-16    -48    
176    176    
-16    48     
144    -80    
32     -96    
-128   96     
176    -80    
304    -80    
-160   64     
-112   32     
128    112    
32     -176   
320    320    
-96    224    
48     272    
-192   -96    
288    256    
-16    192    
48     -32    
16     448    
48     48     
-96    208    
112    0      
0      -32    
48     -176   
288    352    
-80    -672   
112    192    
-144   -144   
-16    176    
128    -256   
-1312  112    
80     -768   
96     -144   
32     16     
32     -128   
112    -80    
224    -80    
0      -320   
-64    -240   
256    112    
-144   -480   
144    -224   
-96    -80    
304    16     
96     48     
-960   -16    
-96    -656   
224    -32    
64     160    
48     -144   
160    144    
-16    0      
96     80     
80     32     
32     64     
-64    -32    
160    -64    
96     240    
16     -48    
-96    -784   
-224   128    
0      176    
96     -160   
-80    -368   
176    -336   
64     16     
0      -48    
32     -96    
208    192    
16     160    
-32    -64    
80     -320   
112    -80    
64     -256   
-16    -128   
48     -240   
208    528    
-48    288    
-176   -240   
16     -464   
64     48     
96     272    
-208   -288   
192    -32    
-48    144    
304    304    
-48    -112   
48     224    
-160   176    
96     -608   
-272   -160   
256    128    
-688   96     
0      -112   
32     112    
16     272    
-192   144    
96     -864   
-448   0      
128    -2160  
-320   -80    
-80    32     
-80    48     
-16    144    
-112   320    
-304   -368   
80     -304   
-144   816    
32     0      
-528   -864   
144    -544   
192    496    
-48    208    
-32    -384   
320    -1424  
-16    208    
288    -128   
400    656    
-752   -1024  
272    80     
-80    0      
-32    656    
-304   -416   
208    -256   
-1040  -128   
96     0      
-880   1136   
-160   -592   
16     -528   
-80    272    
-48    48     
32     -96    
128    -128   
-176   64     
112    320    
80     400    
32     -560   
-464   -240   
304    336    
-336   96     
16     -96    
-32    -192   
192    208    
-240   -416   
144    -192   
-128   -112   
240    112    
-192   -32    
-176   0      
192    -48    
-224   -32    
192    224    
-96    80     
656    208    
-656   -64    
368    -368   
128    176    
96     -208   
112    -64    
48     -432   
240    368    
-80    -64    
320    240    
-128   368    
160    -240   
-48    -320   
128    288    
-176   -320   
144    176    
0      240    
96     -336   
-16    128    
32     0      
144    400    
-304   32     
-1104  -432   
96     -336   
-1632  128    
160    48     
-64    16     
-64    -48    
32     -288   
240    -32    
128    400    
-16    -288   
-992   -272   
-32    112    
-80    80     
224    448    
-320   -224   
-32    16     
-96    256    
-176   -64    
0      32     
-208   96     
336    64     
-256   -32    
48     80     
-48    -48    
-112   -160   
-128   -16    
176    112    
-352   -240   
272    -112   
-224   -208   
-64    -288   
-160   -480   
-128   -144   
144    -16    
-464   -16    
64     -64    
-176   80     
-16    128    
-16    0      
-80    -48    
0      -128   
208    -80    
-256   -128   
48     96     
-64    128    
16     160    
-48    128    
32     64     
128    -48    
-144   32     
-64    0      
-432   -144   
176    48     
-48    32     
144    144    
-80    -144   
64     96     
-80    -96    
16     48     
-208   32     
32     128    
208    192    
-416   80     
-48    80     
-304   -64    
0      80     
-64    64     
-64    64     
-768   -32    
-240   64     
288    -80    
-112   32     
48     -96    
-48    48     
64     48     
32     32     
-64    0      
0      -16    
-16    32     
-176   352    
240    304    
-272   -208   
128    -416   
-512   -96    
400    128    
-288   -80    
256    64     
-112   112    
128    272    
-160   -128   
256    -96    
-128   160    
160    96     
-80    32     
48     16     
64     16     
352    256    
-272   176    
32     176    
0      192    
-1168  112    
80     208    
-176   -48    
-48    32     
-16    96     
-272   32     
16     -112   
80     -16    
112    128    
-176   112    
80     144    
-240   -48    
-128   48     
-112   48     
224    176    
-688   -80    
-128   64     
128    192    
-64    80     
-16    32     
96     112    
320    528    
-736   144    
144    -96    
-176   -144   
64     -160   
48     -16    
-16    -64    
-64    -112   
48     32     
-32    -32    
-48    0      
-32    80     
176    112    
-32    112    
-80    64     
-112   0      
-16    64     
208    384    
-64    -16    
128    208    
-64    -32    
96     128    
-256   -32    
16     112    
-240   -208   
224    128    
-112   -16    
-80    144    
16     0      
-224   -96    
448    32     
-48    144    
224    48     
-160   80     
112    16     
48     112    
-224   32     
-144   -80    
160    64     
80     128    
304    192    
160    160    
-176   -16    
-32    48     
160    64     
352    224    
-384   160    
96     96     
-96    0      
176    48     
32     -80    
80     112    
32     32     
-16    16     
32     80     
16     -48    
-96    96     
-64    32     
32     -80    
48     16     
144    96     
-128   32     
-48    48     
-64    -80    
304    256    
-80    208    
-112   208    
-176   96     
16     16     
-32    16     
144    176    
96     128    
0      80     
-96    16     
96     16     
128    176    
-96    416    
64     224    
-96    -96    
-48    144    
0      -80    
48     80     
448    512    
-80    272    
80     16     
-16    224    
192    272    
-48    240    
16     0      
32     240    
208    416    
96     176    
16     272    
-32    16     
144    96     
-192   -96    
32     80     
-80    112    
112    64     
-32    80     
0      32     
32     80     
-16    80     
80     112    
384    304    
-224   112    
-64    -80    
112    320    
-112   -496   
144    304    
128    272    
-80    -96    
0      -64    
208    160    
-32    -48    
48     192    
16     64     
96     224    
48     224    
-64    -128   
64     80     
-32    16     
80     128    
-160   -80    
192    -48    
16     112    
-48    -160   
80     80     
32     -896   
-128   112    
96     128    
-32    0      
16     112    
96     64     
-16    240    
160    80     
-80    0      
208    368    
-240   -96    
-48    -336   
64     -192   
-16    -160   
0      64     
64     -96    
80     144    
64     -400   
-16    144    
16     32     
-16    64     
112    144    
-16    128    
48     80     
0      80     
48     32     
-144   -144   
96     112    
-48    -176   
-32    80     
96     -224   
-32    -96    
64     -688   
64     64     
0      -336   
0      80     
-32    64     
-48    128    
48     96     
160    240    
128    464    
-96    272    
-80    240    
64     160    
-192   -112   
80     -128   
-272   -192   
-336   -352   
224    -64    
-416   -1504  
160    576    
-16    272    
-48    -80    
128    -48    
-240   304    
176    128    
48     0      
-192   448    
-32    320    
-192   -144   
304    -96    
-240   144    
192    -384   
112    320    
64     -432   
128    -352   
0      432    
176    16     
176    368    
16     368    
-64    48     
160    -512   
144    64     
-64    -240   
-176   80     
208    -1024  
144    288    
-32    -128   
224    -224   
48     -144   
544    352    
-144   592    
304    96     
-16    -176   
144    304    
80     64     
-144   -288   
224    64     
240    48     
0      -80    
96     -16    
208    240    
96     -48    
128    -16    
144    -704   
0      112    
64     -64    
272    -48    
-304   608    
464    -368   
0      -592   
336    816    
176    384    
-144   -16    
208    -96    
112    0      
112    256    
-48    -160   
64     -576   
64     -208   
48     176    
128    464    
48     -96    
0      -208   
-1856  -160   
288    -224   
-224   32     
112    -64    
80     144    
240    -992   
-144   -64    
144    144    
16     -64    
96     -80    
192    208    
-32    -32    
208    384    
0      -48    
192    208    
-368   240    
16     0      
144    416    
224    192    
-80    -160   
160    -160   
-160   48     
-32    -880   
-128   -112   
272    240    
0      32     
-32    -208   
144    64     
-272   -160   
-16    -224   
32     -64    
0      -176   
48     -32    
0      80     
80     -96    
32     352    
16     240    
16     -208   
48     -16    
64     -16    
48     48     
-64    -128   
96     80     
-16    -80    
176    -32    
-32    -144   
128    -336   
-1168  -192   
224    -96    
-112   208    
144    -192   
0      -96    
48     -496   
-96    -16    
-96    -1936  
64     32     
16     -224   
240    176    
-256   80     
112    -48    
-416   64     
208    -32    
-320   -464   
256    -272   
240    160    
-320   -160   
48     -288   
368    -240   
16     160    
48     -160   
0      160    
32     -32    
80     0      
-80    160    
128    -48    
-192   -64    
112    -80    
-48    80     
64     0      
-528   -48    
16     -208   
64     96     
-32    -16    
-16    64     
160    -608   
128    96     
-80    64     
48     80     
112    16     
128    48     
-432   32     
128    48     
-240   0      
-112   -112   
-96    -112   
-128   -160   
80     0      
144    -160   
-16    64     
176    -304   
-80    -80    
144    -128   
272    -48    
-304   48     
112    80     
64     48     
272    112    
-416   -16    
208    -64    
-80    96     
112    32     
-32    16     
160    -112   
-32    32     
-32    -272   
192    -80    
16     80     
128    112    
-16    80     
128    32     
-112   -16    
320    80     
-384   96     
128    -112   
128    -80    
192    256    
32     192    
-272   -160   
16     32     
-192   -96    
-528   -64    
80     80     
-1392  -160   
112    48     
80     -48    
160    -112   
-48    176    
144    80     
-240   -32    
-48    -48    
-784   -32    
-352   144    
-256   -224   
-160   -112   
352    112    
-144   0      
64     -80    
-240   176    
112    64     
-528   48     
160    64     
-16    80     
-64    0      
-288   -48    
0      48     
160    288    
-80    64     
192    -48    
-80    112    
16     -128   
16     192    
-48    64     
-160   -16    
80     128    
192    272    
-64    -64    
-336   -128   
-32    112    
-32    -128   
-64    112    
112    16     
32     208    
-208   -176   
80     160    
112    80     
-208   -64    
16     112    
128    64     
32     32     
-96    112    
-48    -16    
-336   -160   
192    16     
-1168  80     
192    0      
-432   -16    
240    96     
-112   -48    
-32    48     
-32    80     
-176   32     
96     0      
-160   80     
80     -32    
-96    0      
32     240    
16     160    
-208   0      
-96    -16    
48     96     
-272   -352   
96     64     
112    144    
-208   -16    
-16    96     
160    144    
-160   176    
-160   -256   
0      32     
208    144    
-288   32     
144    112    
-128   16     
-144   96     
-32    48     
128    48     
80     64     
48     96     
-64    -32    
-144   -144   
80     64     
-160   128    
32     208    
-80    80     
-112   -160   
64     160    
-208   -272   
-208   -112   
-256   -272   
32     224    
-1248  32     
-48    432    
-16    -32    
0      16     
192    896    
-304   -464   
-16    464    
64     -112   
-64    -160   
160    480    
-192   48     
0      144    
192    368    
-336   -624   
-48    368    
-224   -176   
-32    176    
-32    240    
-224   -160   
256    96     
-144   80     
16     96     
-208   32     
384    144    
-288   -32    
32     32     
-32    16     
48     112    
-32    16     
160    208    
-64    272    
-32    112    
48     -32    
48     320    
112    176    
-112   160    
32     32     
-176   -16    
32     112    
0      144    
-80    240    
128    240    
-32    0      
-192   -112   
112    -64    
-64    0      
64     0      
-32    32     
0      64     
-16    64     
64     96     
0      64     
16     32     
-48    16     
-144   -320   
96     -128   
-144   0      
32     160    
-224   -16    
48     128    
-48    144    
64     32     
352    496    
0      416    
-16    304    
-112   432    
32     64     
144    -16    
32     144    
-224   -48    
208    48     
-288   48     
272    32     
-176   224    
224    96     
16     112    
0      16     
32     112    
-16    112    
64     80     
-48    80     
64     128    
-48    192    
240    304    
-160   16     
16     -32    
-144   -112   
144    -128   
0      224    
0      -224   
-48    -64    
-144   32     
-256   -160   
208    -448   
16     -112   
112    144    
-48    32     
-32    192    
48     -192   
208    -128   
32     400    
32     -96    
256    32     
96     496    
-80    -144   
96     -112   
16     128    
-32    32     
528    704    
-528   -272   
-32    416    
96     -16    
0      -224   
-240   240    
160    480    
64     -16    
-192   32     
192    -128   
-80    288    
48     0      
64     -32    
144    208    
-48    192    
-80    -128   
224    192    
-96    208    
80     32     
-64    -32    
272    -16    
-272   -320   
240    336    
-48    64     
16     -176   
176    304    
-160   -656   
176    -96    
0      64     
192    48     
-16    80     
176    -16    
-64    64     
272    320    
-48    192    
-208   336    
128    112    
-80    144    
-16    112    
336    320    
-320   288    
64     -592   
-240   -96    
224    80     
48     208    
96     48     
-192   16     
-32    96     
96     176    
-80    192    
112    144    
96     224    
-64    176    
-80    -208   
-80    -240   
-192   -400   
48     -480   
160    112    
0      -720   
-128   48     
-176   -160   
208    64     
80     80     
-144   64     
-272   -64    
320    -32    
-144   48     
144    -112   
-144   112    
160    -176   
32     176    
16     -192   
32     176    
128    -256   
-160   -16    
32     32     
48     64     
-16    0      
96     192    
48     48     
0      64     
-80    32     
16     -64    
112    48     
-112   0      
48     256    
-80    -80    
80     128    
112    -848   
-128   80     
0      -960   
176    176    
-80    80     
-16    96     
144    48     
-176   64     
64     112    
-128   48     
176    96     
0      -560   
32     -48    
-112   -608   
-48    -48    
144    -496   
0      96     
-48    -336   
192    96     
64     48     
-64    80     
96     96     
80     128    
112    208    
-112   48     
16     32     
224    16     
-288   176    
192    -112   
-32    96     
-16    -160   
336    0      
-160   16     
128    -96    
-320   16     
480    176    
-224   -80    
320    -48    
16     128    
32     0      
160    -16    
80     176    
-192   0      
-16    -64    
256    112    
-128   -80    
0      144    
240    -96    
-192   -1056  
64     16     
48     -544   
32     -16    
-288   -16    
48     -1424  
-16    -224   
176    -1888  
-96    -32    
112    16     
16     -32    
128    96     
32     -192   
-16    64     
112    96     
112    -176   
-48    48     
-16    16     
240    -192   
-1792  -208   
128    -176   
208    0      
-112   32     
112    -192   
32     112    
48     -368   
-32    48     
432    144    
-400   -288   
160    80     
112    64     
80     -16    
0      -128   
80     -304   
-320   -144   
224    -96    
32     -80    
0      -48    
256    48     
32     -528   
48     16     
16     -512   
48     64     
144    112    
32     368    
176    0      
144    48     
-368   -160   
48     -160   
-32    32     
48     -32    
-368   -64    
64     -96    
-224   -352   
160    -608   
112    -64    
0      -336   
-32    64     
48     -128   
48     80     
80     -32    
0      -16    
-32    32     
128    80     
-192   96     
-48    -160   
-480   32     
16     48     
-64    -96    
48     16     
-32    32     
192    -576   
16     128    
160    -1456  
-112   112    
32     -96    
128    32     
384    400    
-192   224    
-192   -16    
128    -48    
-16    0      
128    64     
-528   64     
48     16     
112    16     
48     -528   
192    192    
-96    -1520  
192    96     
0      80     
96     0      
-96    -16    
208    48     
-320   -128   
48     -32    
-160   64     
64     -160   
-416   64     
-144   -176   
-176   336    
-512   -32    
0      -80    
-16    -800   
496    224    
-448   -112   
304    64     
-240   48     
80     -16    
-176   -16    
320    128    
-96    0      
-16    -48    
-304   -80    
208    -64    
208    144    
-96    112    
48     64     
-32    -352   
48     -32    
-80    16     
160    -16    
-208   -96    
240    -16    
160    112    
112    32     
-272   32     
112    -16    
-304   -448   
-32    -304   
-16    -224   
0      -128   
-32    128    
-256   -528   
-48    -112   
112    560    
64     192    
-224   -208   
-16    32     
-32    -32    
-80    -96    
-32    32     
-144   192    
-48    -256   
-336   -528   
240    144    
-1360  -176   
320    368    
-464   -240   
-112   384    
0      -224   
-128   -240   
-112   352    
-1008  192    
-128   -208   
192    32     
-16    240    
16     16     
-80    -80    
-48    -224   
0      128    
-144   -160   
-128   -160   
208    -48    
-144   -48    
96     -160   
-528   -208   
32     0      
-160   48     
-48    80     
-672   -64    
256    128    
48     48     
-112   16     
64     -112   
64     96     
160    48     
-144   96     
144    32     
-240   -32    
-48    0      
-80    -16    
-224   16     
384    16     
-320   80     
-1440  64     
-272   -16    
-736   -256   
-32    224    
0      48     
-64    64     
-64    -192   
16     0      
-112   -160   
-112   112    
-16    48     
80     -48    
-96    0      
128    128    
-208   256    
-192   96     
0      -32    
-752   0      
64     112    
-96    -48    
160    144    
16     -16    
-128   128    
80     0      
80     80     
64     -48    
0      48     
-96    160    
48     -48    
-48    256    
-144   -80    
-64    -160   
-208   32     
144    -176   
128    -176   
32     176    
32     0      
0      32     
160    160    
-144   -32    
-112   80     
-64    -32    
96     -224   
-160   0      
96     32     
-160   16     
160    112    
-352   -32    
128    16     
16     -112   
128    704    
-48    16     
-144   -336   
192    160    
-144   96     
-16    -256   
96     192    
32     144    
-16    -144   
512    640    
-672   512    
96     -352   
-688   0      
432    -352   
-720   176    
144    -16    
176    432    
-128   -160   
-112   96     
144    352    
0      32     
16     48     
16     96     
-128   -128   
-80    160    
-272   -128   
128    272    
-256   192    
-32    160    
-560   64     
-192   384    
224    432    
48     240    
80     64     
16     16     
-80    -384   
-80    -192   
160    32     
-208   -64    
128    80     
-320   -112   
432    400    
-64    112    
-16    64     
-16    48     
48     -96    
-48    -128   
-64    -112   
80     16     
320    160    
-144   96     
-16    -16    
-64    -48    
112    96     
-64    96     
-64    -80    
96     96     
-288   -80    
64     -80    
-144   64     
496    528    
32     -32    
64     -48    
128    272    
-128   -80    
-128   128    
320    16     
-144   80     
224    -96    
-64    160    
208    -96    
-336   160    
144    48     
-128   64     
112    144    
64     128    
48     208    
16     96     
-128   48     
96     16     
-16    80     
64     288    
160    64     
-256   0      
64     128    
-192   -64    
96     -16    
-112   16     
64     16     
-32    64     
-240   -64    
256    48     
-80    32     
-32    -80    
32     -64    
128    64     
0      80     
-64    32     
-288   64     
112    16     
0      48     
0      48     
64     112    
0      48     
48     128    
-96    64     
16     96     
16     64     
0      96     
32     48     
16     32     
128    0      
48     160    
-80    32     
32     80     
-16    144    
32     -784   
-16    -112   
144    400    
-32    32     
-64    144    
272    48     
-16    48     
48     112    
32     64     
176    224    
-192   240    
32     192    
64     128    
128    144    
16     -304   
96     -528   
32     -48    
48     80     
96     176    
80     32     
-16    80     
128    128    
-48    112    
672    432    
-688   176    
160    0      
-16    80     
0      128    
112    96     
-288   0      
-112   -144   
192    16     
32     -128   
96     -48    
16     160    
0      144    
-16    64     
-64    0      
-16    0      
-32    -64    
144    16     
48     64     
-128   -16    
432    480    
-224   144    
-64    -144   
144    128    
16     -368   
32     96     
-48    64     
192    272    
48     64     
-32    48     
0      -48    
192    160    
-192   32     
48     160    
64     -32    
-48    -32    
144    208    
-112   -16    
112    112    
0      -208   
80     48     
-48    -496   
0      0      
128    32     
-128   32     
64     -16    
96     0      
-32    32     
32     48     
-160   -144   
416    -176   
-144   160    
64     0      
224    96     
0      -48    
192    112    
-64    -48    
-48    48     
144    144    
144    160    
112    144    
32     48     
96     80     
48     128    
-32    64     
208    -160   
-80    80     
160    -96    
-80    176    
224    32     
32     192    
-48    -400   
48     64     
0      -1920  
144    64     
-128   -96    
192    -32    
-32    48     
160    64     
144    112    
160    -256   
-176   48     
288    32     
-80    160    
80     -176   
16     80     
-128   -96    
192    -176   
128    -96    
192    224    
32     0      
32     -64    
16     -80    
272    528    
32     448    
-144   -368   
144    32     
112    -208   
32     144    
-16    -144   
160    688    
528    352    
-256   128    
96     -224   
64     0      
-96    -64    
208    -32    
-80    32     
-16    -336   
-48    -288   
208    -144   
-16    -112   
-32    -256   
176    112    
48     -112   
64     64     
192    192    
64     -208   
144    -64    
224    -1584  
224    96     
304    -32    
192    176    
-96    0      
176    -96    
-32    64     
96     -336   
-224   160    
224    -80    
-80    -208   
96     80     
208    -160   
0      -320   
0      176    
96     -112   
-64    48     
-176   -304   
-48    -240   
-720   -144   
48     -112   
-112   112    
64     16     
16     64     
80     -608   
-32    -144   
192    496    
128    -208   
-112   -48    
80     -144   
-48    144    
16     -96    
-288   -176   
-48    -416   
32     0      
-160   256    
288    -256   
-112   -32    
272    48     
0      -608   
192    -48    
-64    -928   
80     -32    
96     16     
-96    48     
32     -304   
16     32     
-32    -16    
16     64     
-208   -176   
-128   -48    
512    656    
64     -112   
-64    -208   
48     -320   
64     96     
16     -160   
96     112    
32     -48    
-32    -112   
64     -400   
160    -176   
-16    272    
176    64     
-176   144    
160    -48    
-704   0      
0      -256   
-80    -112   
32     96     
80     -480   
48     -512   
64     0      
0      -2336  
-48    48     
448    64     
-224   16     
80     -32    
48     -80    
-48    -80    
-112   -16    
-512   -64    
96     -16    
-560   -16    
96     -32    
-80    -144   
432    -208   
-256   -112   
-64    -1824  
336    -176   
-48    128    
288    48     
-192   -48    
-48    -192   
-224   -272   
64     16     
-64    -176   
240    -160   
-320   432    
0      -32    
96     240    
224    -48    
-80    48     
160    -192   
32     -96    
112    -80    
-112   -400   
-384   96     
-32    64     
0      192    
0      0      
-32    -80    
112    96     
-272   32     
80     -144   
240    336    
48     384    
176    752    
-160   -464   
16     -400   
-224   -384   
144    1056   
-48    336    
-224   -528   
144    -48    
-64    -80    
-240   -80    
64     -64    
48     192    
-112   -64    
192    -16    
-32    -208   
-32    -112   
-640   -352   
-448   96     
-32    32     
-16    240    
-32    -272   
-16    -80    
128    -64    
-144   96     
80     256    
48     -16    
-80    -48    
-1168  192    
176    96     
-880   -128   
224    400    
-240   160    
-256   288    
320    672    
-112   656    
-96    224    
-1072  -144   
-64    -16    
112    -48    
32     0      
64     -144   
176    128    
-64    -256   
176    -48    
-192   -112   
240    224    
-160   48     
80     16     
-64    -80    
-272   80     
-80    272    
-576   -272   
368    -64    
-320   208    
160    240    
-416   -272   
48     -112   
128    -144   
16     112    
0      -208   
80     -16    
0      160    
240    208    
-96    208    
-80    64     
16     16     
112    -32    
-48    -32    
-336   0      
-64    -32    
-48    -80    
48     240    
112    160    
-176   96     
128    64     
16     32     
-112   64     
-80    32     
-112   -112   
32     -208   
192    16     
64     112    
-432   -96    
-144   -160   
192    -32    
112    0      
464    320    
-256   160    
96     -16    
-32    96     
256    128    
384    256    
-656   -64    
112    80     
-160   128    
-80    -32    
-304   -224   
-192   -32    
-240   -48    
112    96     
-640   48     
-192   32     
-48    -176   
-128   80     
160    64     
32     112    
96     48     
-32    96     
96     160    
48     16     
-64    0      
112    -32    
-48    160    
-32    -32    
0      128    
-208   -32    
128    160    
-16    160    
-144   224    
-176   -32    
208    0      
112    48     
80     0      
96     64     
-240   -16    
208    16     
-112   16     
208    -96    
-64    48     
192    80     
-432   -128   
320    256    
-1328  0      
64     176    
-32    64     
-112   64     
80     48     
-176   -48    
352    176    
16     160    
-160   -128   
176    -176   
192    64     
-176   -32    
64     96     
-160   -16    
0      32     
-48    0      
112    48     
-64    -288   
0      16     
352    720    
-480   224    
176    80     
-144   0      
96     -16    
-48    0      
0      16     
-112   -16    
32     128    
-16    -16    
80     -64    
0      224    
48     112    
-32    128    
48     16     
176    160    
192    192    
-240   -144   
64     176    
128    0      
-336   -16    
112    176    
48     80     
80     112    
-144   -80    
-32    -16    
-64    160    
128    192    
-32    80     
-16    -160   
224    -144   
64     208    
-32    -16    
-80    32     
160    48     
-80    64     
48     64     
-176   -64    
64     96     
112    -96    
-80    -48    
208    80     
96     80     
-80    -32    
128    -48    
16     80     
80     112    
-32    80     
128    -48    
-144   -64    
48     16     
32     128    
-16    0      
112    112    
64     64     
80     16     
64     48     
112    64     
0      48     
16     112    
0      -16    
80     48     
80     64     
-144   64     
112    112    
16     -80    
112    32     
-128   -128   
64     -560   
-32    112    
176    128    
-144   -160   
128    160    
320    224    
-160   -112   
112    176    
208    448    
-112   272    
-32    -16    
96     48     
-144   128    
208    128    
-96    32     
48     -1104  
-48    16     
0      -16    
64     0      
-80    32     
80     64     
-128   112    
64     -32    
-80    128    
128    144    
-208   0      
-48    -176   
48     -16    
-16    240    
-16    112    
64     -192   
-48    -192   
0      -192   
128    -304   
-112   -160   
256    -80    
80     -80    
-64    -112   
96     32     
0      112    
-128   -352   
400    112    
-32    336    
80     96     
-80    96     
32     -304   
176    224    
16     -368   
-224   -32    
144    144    
-144   -112   
96     -144   
-80    320    
240    336    
-48    112    
64     -240   
96     304    
-48    32     
112    112    
48     192    
0      -112   
96     336    
208    -496   
-32    -48    
144    80     
-112   0      
144    144    
-160   176    
576    112    
-208   -48    
32     16     
-176   -464   
320    80     
32     192    
160    192    
16     -128   
176    208    
-48    -288   
64     208    
-112   32     
0      80     
224    -128   
-224   -208   
128    96     
64     400    
-192   -240   
304    224    
32     416    
-16    -352   
48     144    
-64    -352   
96     -112   
96     16     
-160   240    
512    -816   
-288   288    
32     208    
192    272    
-144   176    
336    16     
-352   32     
288    96     
-64    128    
80     -128   
144    80     
32     -240   
192    304    
176    432    
0      208    
-144   -848   
-96    -192   
16     176    
192    -128   
-144   16     
144    128    
32     48     
-368   -352   
336    -160   
-96    -240   
192    112    
160    288    
96     560    
80     0      
48     128    
240    160    
-192   320    
48     144    
-48    -416   
112    -112   
96     0      
272    512    
-416   -240   
48     -592   
160    -16    
80     224    
-288   -112   
96     -16    
208    -96    
-80    64     
64     -128   
112    96     
64     -416   
48     -144   
-16    -32    
80     -2480  
-16    16     
-112   -112   
208    -736   
48     -128   
32     -560   
16     128    
-288   -128   
304    -816   
0      480    
304    304    
-208   -704   
128    0      
144    -48    
-64    -112   
224    -16    
240    -240   
-416   -128   
176    -496   
112    144    
0      -592   
144    144    
-16    176    
96     96     
-32    -80    
192    -176   
48     112    
160    -80    
112    -80    
0      64     
16     -64    
96     80     
-1680  -112   
-128   -656   
256    -512   
-32    -128   
48     160    
112    -560   
-48    -336   
112    -336   
-32    224    
96     -368   
-128   16     
64     -128   
208    64     
-288   -16    
-192   -176   
-304   192    
48     192    
48     48     
144    32     
80     160    
240    -464   
-192   -544   
272    -2048  
-112   -208   
288    -80    
-48    64     
240    -48    
-48    -48    
160    16     
0      -64    
32     80     
16     16     
-112   160    
-32    -80    
-96    -80    
224    -176   
-272   -32    
192    -688   
48     128    
176    96     
-144   48     
160    -16    
-48    -128   
-112   -64    
-192   -96    
304    112    
-144   -64    
-464   -80    
32     -224   
-272   -80    
-160   -352   
128    -112   
192    -80    
-48    -80    
192    -1680  
-224   240    
240    -16    
-192   80     
48     48     
0      -48    
-48    0      
-144   -192   
-208   -32    
-192   32     
-768   240    
416    320    
-224   64     
208    -208   
96     208    
-16    -1312  
-176   -32    
224    192    
16     -128   
160    -160   
336    16     
272    96     
176    256    
-320   240    
160    160    
-304   -16    
192    -288   
160    -48    
-128   -144   
144    224    
80     0      
144    128    
48     -80    
32     -144   
-128   -192   
192    -208   
-48    -32    
176    16     
-96    -32    
160    -32    
-128   64     
48     -272   
-48    96     
32     -224   
-80    128    
144    -512   
80     -96    
-128   32     
32     16     
32     0      
0      160    
-112   -96    
224    256    
-128   48     
-208   0      
-304   -112   
-96    -272   
176    96     
112    0      
-96    80     
-336   80     
-1008  -48    
-112   64     
-304   16     
-48    48     
-48    -32    
-144   -48    
-176   -96    
192    80     
48     352    
16     -272   
-112   16     
176    128    
-416   -160   
0      80     
80     160    
-368   80     
-32    16     
-80    -128   
-240   0      
-1040  -16    
-192   -32    
64     16     
240    16     
-96    -16    
176    0      
-816   -384   
272    128    
-272   -352   
96     16     
176    32     
-32    96     
112    16     
-96    -16    
-80    32     
-144   96     
-80    32     
-352   112    
-112   -272   
-32    -304   
-16    240    
64     -80    
16     48     
-16    -32    
0      32     
80     48     
0      -96    
-144   32     
-32    32     
-368   -112   
112    0      
64     160    
-128   0      
0      -48    
-176   -32    
112    240    
48     16     
-96    64     
224    -192   
-32    32     
112    96     
-288   64     
208    112    
-112   144    
0      80     
-176   128    
16     112    
-384   -64    
0      -16    
-1008  64     
80     144    
-64    -48    
208    112    
16     64     
-128   144    
-96    -304   
128    -48    
16     -96    
-96    144    
-48    16     
-96    240    
-224   48     
-48    -576   
176    -160   
-160   -96    
-96    -32    
64     -224   
16     176    
192    48     
-160   320    
208    64     
-144   192    
96     0      
-192   -64    
112    16     
-48    -112   
80     112    
-112   0      
112    48     
-400   -416   
48     480    
80     192    
-32    32     
-96    -160   
-32    -160   
48     96     
64     352    
-32    48     
-224   -32    
-112   -224   
80     -432   
0      496    
-80    -560   
32     672    
-64    -48    
0      -176   
176    -96    
-80    -32    
352    -448   
0      112    
48     192    
-32    0      
96     256    
-240   -48    
192    -432   
-112   624    
144    128    
-224   -112   
-80    -288   
48     640    
-48    -80    
144    144    
0      32     
144    432    
-192   32     
-16    -128   
400    192    
-144   192    
368    32     
-32    160    
-112   -208   
160    144    
-176   -32    
48     -32    
-80    -112   
-48    80     
288    320    
304    208    
-64    368    
-128   336    
176    -48    
-144   64     
-176   112    
128    -48    
-464   -608   
80     384    
-288   112    
-64    -256   
-16    -64    
128    -144   
368    1024   
-64    512    
-64    -272   
-144   -16    
272    -64    
-288   400    
368    -208   
-112   32     
112    224    
0      96     
-48    144    
352    0      
-64    224    
0      32     
368    240    
-176   448    
224    32     
-384   -432   
288    -480   
80     720    
192    -48    
-176   96     
48     -64    
-80    -208   
112    224    
-64    -112   
160    304    
-656   -864   
368    224    
144    288    
-16    -128   
384    480    
-16    336    
48     96     
32     -16    
224    80     
-208   -80    
224    -192   
208    544    
-112   -32    
-96    -32    
320    80     
-16    -48    
16     -1136  
352    32     
-64    240    
96     -224   
64     112    
160    128    
-16    16     
96     96     
160    128    
208    384    
-208   -64    
-48    400    
64     0      
-336   -832   
528    -672   
-144   800    
160    -144   
-48    -384   
176    1136   
-64    -304   
-208   144    
-48    -160   
208    -336   
112    560    
-336   304    
32     -352   
-128   -144   
96     96     
80     -32    
-48    112    
80     -64    
80     -256   
96     576    
-48    -16    
416    176    
-224   80     
128    -176   
-16    288    
-192   80     
224    96     
-96    304    
-112   16     
-64    -64    
32     48     
32     48     
0      -464   
96     128    
0      -1120  
32     80     
-48    80     
-96    -528   
256    -32    
192    16     
-160   160    
304    32     
240    352    
-48    928    
-32    192    
96     80     
-224   16     
-16    -368   
144    592    
240    96     
-368   -208   
352    176    
-128   112    
48     368    
224    96     
-64    -16    
128    224    
208    224    
-160   208    
-64    144    
96     -352   
-128   -16    
96     -80    
0      -48    
144    -240   
16     0      
48     -336   
96     160    
128    -128   
96     112    
-224   -112   
224    -16    
-160   -112   
272    96     
-32    -48    
144    -192   
96     48     
224    -224   
80     0      
0      -352   
16     96     
224    -32    
-224   96     
224    32     
-144   64     
112    64     
144    160    
-16    32     
-48    -208   
-80    0      
0      48     
-320   192    
400    224    
-224   48     
80     -304   
-32    -192   
112    -160   
128    48     
-32    -96    
144    48     
-64    64     
96     128    
-32    112    
-16    -928   
112    176    
112    -240   
48     48     
64     -80    
160    96     
-48    -96    
128    96     
-80    -560   
96     96     
112    -304   
-160   112    
32     64     
-48    96     
80     96     
176    -80    
-32    80     
192    32     
96     128    
112    128    
-96    192    
-48    -80    
16     64     
-112   -48    
320    192    
0      -16    
208    -1824  
0      -32    
-48    -1568  
-240   -1968  
192    -272   
48     -544   
16     -240   
-80    -496   
208    -80    
-48    112    
32     144    
160    192    
0      80     
-128   -368   
-272   128    
112    64     
-64    192    
-16    -16    
-128   -560   
288    64     
256    -32    
16     -224   
240    -720   
64     -256   
-208   -1232  
16     -48    
16     96     
128    -64    
128    -304   
-256   0      
-64    -384   
192    64     
-112   144    
-48    0      
-1456  0      
80     -112   
192    -48    
-112   -256   
192    -80    
112    -352   
-64    -64    
80     -384   
0      -48    
256    -144   
64     144    
16     -48    
32     -80    
-224   -144   
128    -112   
-832   64     
-96    -176   
-80    48     
144    -112   
80     64     
-80    -128   
128    16     
-64    -2208  
-96    160    
112    0      
64     176    
-224   -256   
288    -496   
-176   48     
208    -160   
-160   32     
48     80     
80     -80    
64     128    
-48    -80    
-16    -80    
-64    -32    
80     -784   
32     0      
128    -16    
48     48     
176    -128   
144    48     
-160   -160   
-64    -16    
112    144    
-80    -16    
-1312  16     
96     -48    
-48    -80    
224    -32    
-64    -48    
96     -272   
32     144    
112    -1184  
-16    48     
-96    48     
336    112    
-192   96     
32     80     
16     48     
-112   -112   
160    -144   
32     -240   
32     0      
-48    -48    
-112   144    
224    -432   
-160   64     
192    -1648  
64     560    
16     64     
-176   -32    
192    -16    
-48    32     
-688   128    
160    352    
-96    608    
160    304    
-176   160    
48     -176   
-80    48     
-16    -560   
176    416    
80     16     
0      16     
-112   32     
16     -272   
0      -48    
-48    -80    
-80    192    
16     -128   
64     48     
112    208    
144    -240   
144    -400   
-16    80     
-64    -208   
432    96     
-208   400    
240    -480   
-64    656    
288    -112   
0      512    
224    32     
0      -480   
96     -64    
48     176    
80     -208   
-272   -32    
144    80     
-48    112    
32     -192   
-128   48     
-192   -16    
-1200  -96    
-16    96     
-944   176    
16     16     
32     -16    
-192   0      
144    -48    
-240   16     
-544   -80    
-64    -128   
-160   144    
192    480    
-320   -320   
16     32     
-192   -32    
32     -176   
-64    0      
-64    -128   
64     -48    
-352   -16    
240    192    
-32    -128   
272    -80    
-48    80     
128    64     
96     -64    
-144   -176   
-368   -640   
-80    -208   
-464   -384   
96     -240   
-224   192    
-32    -416   
64     -48    
-784   0      
-176   -32    
-672   32     
112    32     
0      192    
400    208    
-160   -256   
0      32     
-16    -160   
80     -64    
32     112    
-32    64     
-64    -128   
0      -48    
-48    336    
-320   -192   
64     -224   
-384   304    
16     368    
-96    -208   
-80    160    
-160   -64    
48     -96    
-32    128    
208    240    
96     352    
-208   -160   
-96    96     
16     -176   
-208   -32    
16     272    
48     272    
-176   -16    
-112   -240   
-576   224    
112    32     
48     -48    
-128   -304   
-96    -96    
-48    128    
-112   0      
-16    208    
144    -32    
-112   0      
272    624    
-208   48     
-48    -352   
-816   -1280  
272    336    
-640   288    
0      -16    
96     -96    
-48    416    
-32    208    
-16    304    
-16    -112   
672    976    
-432   1072   
192    -1040  
-16    -48    
0      224    
-48    -32    
-160   -224   
-16    0      
-272   -48    
128    -128   
-128   -336   
16     -192   
256    320    
112    400    
-80    -400   
-96    -288   
240    704    
-224   672    
-16    -208   
-48    -272   
32     -64    
-112   -48    
144    80     
-448   -144   
48     -304   
96     144    
352    96     
-272   -416   
160    16     
240    224    
-432   -480   
96     -544   
224    208    
208    320    
-32    224    
64     16     
-96    -480   
320    48     
-48    208    
64     80     
80     32     
272    320    
-288   -288   
144    -16    
-112   -128   
112    64     
-64    0      
-16    -160   
368    528    
-464   -256   
192    -224   
-416   -128   
112    80     
-112   32     
192    -32    
-16    -80    
-32    80     
-16    -32    
128    -368   
-128   -16    
352    112    
-144   96     
128    48     
-48    48     
128    256    
-224   48     
64     176    
0      112    
-64    128    
144    -16    
-112   64     
128    0      
64     112    
208    160    
-144   48     
64     128    
80     224    
-32    112    
160    80     
-80    16     
-48    -32    
128    80     
32     112    
32     16     
-48    64     
96     64     
64     224    
-80    -96    
16     16     
448    208    
-256   160    
-160   32     
112    80     
96     96     
-64    64     
-16    96     
-96    -64    
272    288    
-128   112    
144    112    
-32    32     
176    128    
-112   80     
-48    48     
80     48     
16     64     
-32    80     
16     240    
80     16     
-16    -96    
208    112    
-144   128    
0      -608   
48     0      
32     32     
64     176    
-32    96     
80     -16    
-112   -64    
-112   64     
160    16     
-48    -16    
-16    -16    
-112   64     
160    176    
-64    224    
-96    112    
-144   -704   
160    144    
32     48     
256    160    
-160   128    
32     240    
112    64     
-48    64     
80     128    
-16    -112   
-160   -112   
208    -64    
-176   48     
240    144    
64     128    
64     -416   
96     48     
144    112    
-192   -112   
-96    -192   
208    144    
112    208    
-64    112    
64     64     
144    48     
16     48     
176    80     
32     32     
192    48     
-224   96     
112    80     
32     -48    
528    688    
-304   416    
64     64     
-144   48     
192    48     
-240   -80    
32     -240   
240    112    
80     -16    
-128   -96    
64     -80    
208    48     
-176   64     
32     -192   
144    48     
-48    -256   
-80    -64    
48     48     
208    128    
-176   -176   
320    224    
-64    32     
112    80     
32     32     
96     32     
144    160    
80     -112   
48     32     
96     0      
16     -16    
144    -320   
64     96     
112    -448   
96     128    
16     16     
-48    32     
144    32     
144    128    
-16    0      
32     96     
160    80     
-80    -80    
96     160    
240    -48    
16     64     
-160   -352   
448    64     
-48    96     
192    32     
32     -672   
128    32     
-64    16     
160    144    
-32    -32    
128    -208   
176    112    
-144   -384   
144    224    
-128   -800   
48     -128   
160    64     
176    112    
64     -240   
0      80     
-48    -176   
192    -96    
-48    -96    
208    96     
-16    80     
144    -192   
32     96     
240    144    
-208   -16    
16     -336   
48     160    
240    -80    
128    16     
32     -240   
160    48     
112    16     
0      112    
0      96     
64     16     
48     368    
0      -256   
48     -48    
16     80     
0      96     
288    816    
288    560    
-512   -944   
192    384    
160    432    
-128   -208   
128    304    
-16    -144   
48     80     
80     -272   
80     -992   
48     -192   
0      -688   
80     -64    
64     -336   
0      -256   
0      112    
80     112    
112    -592   
-64    144    
-208   -464   
272    144    
16     -352   
16     144    
-128   80     
16     -80    
64     96     
-48    -320   
112    -16    
16     48     
-96    -128   
464    -480   
-464   -352   
272    0      
-48    192    
48     -192   
80     16     
64     -368   
64     176    
64     64     
144    192    
-832   -176   
64     -192   
128    304    
128    -48    
-16    128    
112    224    
208    96     
-160   -720   
80     -432   
176    -176   
32     -224   
16     -160   
224    160    
240    480    
-128   -64    
-608   -80    
-16    -160   
128    -32    
0      -32    
336    80     
-256   -208   
240    -96    
-16    -2064  
128    -16    
-48    0      
160    80     
-16    -16    
96     -64    
400    400    
-384   128    
-208   0      
-80    -96    
-1072  -112   
80     -48    
144    -176   
-96    -384   
144    -192   
-48    16     
-16    160    
400    96     
-96    320    
112    112    
16     -32    
-272   -144   
160    -80    
-192   -192   
448    -304   
-672   -112   
0      -320   
-272   -48    
0      176    
320    160    
240    -704   
192    384    
-64    64     
-240   -224   
400    -192   
-176   80     
-128   -256   
336    160    
32     464    
80     -256   
-1024  -32    
80     -64    
-16    -112   
192    -80    
112    176    
-48    -288   
272    224    
-144   -1728  
-32    -448   
0      240    
-160   144    
160    16     
16     96     
-304   320    
-256   -288   
256    -224   
32     64     
224    624    
-144   -288   
208    336    
96     -16    
-80    -80    
-16    -496   
112    -16    
-144   880    
320    -112   
-336   -272   
96     -176   
-80    208    
224    256    
96     -208   
-96    -192   
16     448    
208    16     
-304   16     
176    -672   
288    -336   
-16    -400   
-48    -432   
-240   -160   
368    0      
-160   144    
256    48     
32     -32    
-192   -144   
-96    -64    
-16    -96    
-192   304    
-112   384    
32     432    
-368   -80    
0      -48    
96     128    
-304   80     
-256   0      
80     80     
16     64     
48     -32    
-96    -192   
224    -224   
-192   -16    
-368   -112   
-64    -64    
160    32     
288    160    
-336   0      
-32    208    
192    304    
-400   16     
16     64     
80     32     
32     128    
-992   -224   
-400   -272   
208    -400   
-160   0      
-128   -400   
256    -96    
144    96     
160    144    
-160   -128   
-16    -32    
-32    -16    
32     64     
16     80     
-48    -128   
-192   -112   
32     -224   
-32    0      
-1168  0      
-112   -64    
0      0      
176    112    
-224   -160   
128    16     
-144   80     
112    48     
-176   -112   
96     -112   
-16    96     
112    64     
64     48     
-176   16     
16     16     
-288   -432   
0      -192   
16     -32    
-304   96     
176    -144   
0      144    
240    64     
-16    0      
-128   -64    
-48    -64    
-32    16     
-48    -48    
-48    112    
32     112    
-96    48     
-224   -16    
64     112    
-544   -16    
0      176    
160    48     
-32    -48    
-16    -16    
48     -32    
-96    -64    
-80    -32    
96     96     
-160   16     
16     64     
-208   -112   
144    272    
-656   -112   
-32    80     
-688   -128   
128    208    
-16    32     
-112   -16    
-16    0      
-112   48     
144    160    
32     96     
48     96     
-80    16     
-32    16     
112    48     
0      -48    
-144   -16    
176    64     
-400   -16    
272    192    
-32    96     
48     32     
-144   64     
240    32     
-384   64     
208    176    
-368   0      
0      48     
-96    80     
-16    32     
96     32     
-176   -112   
-16    16     
-336   -112   
368    48     
-128   224    
-16    80     
-32    80     
32     32     
-160   64     
-80    -112   
-112   -32    
64     0      
-16    128    
48     -48    
48     96     
-64    48     
-176   48     
-48    -48    
-16    208    
80     80     
-96    -48    
96     64     
-32    0      
0      144    
-32    112    
48     80     
-16    48     
16     96     
-80    -160   
-208   -64    
-32    -16    
-48    -128   
-16    16     
-16    112    
304    32     
-144   112    
144    16     
-128   32     
32     0      
96     48     
160    208    
-336   -64    
352    176    
-400   80     
112    80     
-96    48     
96     96     
176    176    
-256   -48    
16     32     
96     64     
-80    -80    
128    112    
-176   160    
80     16     
-32    192    
-64    -16    
-80    48     
-112   -48    
32     96     
64     128    
-208   64     
48     32     
160    96     
-16    80     
96     64     
0      64     
64     160    
0      16     
0      -16    
96     32     
-64    32     
256    -48    
-208   144    
176    128    
-352   -48    
80     -32    
96     96     
-208   32     
112    -32    
16     -80    
32     32     
32     80     
160    272    
128    464    
-528   0      
80     80     
80     80     
288    160    
-32    80     
-16    32     
256    528    
-32    80     
80     80     
48     32     
48     48     
32     -48    
-80    -16    
-32    -32    
-192   48     
-48    304    
0      -32    
160    112    
-16    -224   
-16    32     
-48    16     
224    -288   
-48    112    
0      16     
32     16     
128    80     
-176   -48    
112    16     
-128   -416   
48     608    
-80    112    
-272   -224   
32     176    
-256   48     
-80    -320   
16     48     
336    -80    
-64    16     
176    -32    
-32    144    
144    64     
-16    0      
208    144    
-64    0      
-80    304    
16     -32    
-112   544    
240    240    
-64    -320   
-112   -336   
32     256    
240    -208   
-224   48     
176    -672   
0      80     
16     80     
32     96     
32     48     
16     48     
0      -208   
32     96     
0      32     
-176   80     
256    -64    
-112   -80    
16     240    
-112   -112   
16     -32    
80     -32    
-16    64     
32     80     
-96    -48    
64     -384   
208    256    
64     160    
176    -32    
-48    160    
208    208    
96     176    
144    -208   
112    16     
112    32     
-48    32     
96     -288   
-16    96     
-16    -16    
16     64     
-144   -48    
160    64     
32     48     
32     80     
-16    -16    
304    128    
-128   272    
48     -48    
-96    128    
400    144    
-240   320    
48     176    
-32    16     
-112   -848   
160    192    
-96    0      
144    96     
32     144    
288    176    
-256   144    
96     -16    
80     0      
-16    32     
96     16     
-16    32     
144    80     
-48    -96    
336    480    
112    640    
-176   320    
176    -32    
96     112    
224    80     
32     128    
208    208    
112    160    
16     64     
-112   -304   
64     -528   
-144   -448   
320    672    
-48    352    
-80    -64    
-80    -336   
144    32     
32     592    
240    304    
288    -32    
304    -544   
48     -1232  
448    -368   
-16    480    
224    -288   
80     192    
80     -96    
48     480    
-48    -272   
16     -144   
-128   -208   
128    -2064  
288    1008   
-128   432    
48     -16    
-896   -96    
-16    -160   
32     -240   
144    -352   
-96    80     
96     400    
128    336    
32     208    
64     -32    
-32    48     
16     -176   
-224   -304   
208    176    
80     -144   
-16    -112   
-480   -208   
128    0      
64     48     
160    -176   
96     0      
80     -288   
272    208    
-256   -2832  
160    -64    
-48    -96    
-32    -64    
304    64     
-400   112    
96     -16    
-112   -192   
-208   144    
112    -64    
-1376  0      
-96    -176   
-16    -288   
-400   -480   
208    -112   
-32    48     
-80    0      
-64    -256   
32     0      
208    -32    
-80    112    
-16    128    
-48    96     
-64    320    
16     -16    
-784   64     
-32    -32    
64     -16    
0      -176   
256    -32    
96     -16    
112    -64    
0      -384   
96     96     
16     -64    
160    64     
32     48     
48     -64    
-64    0      
320    32     
-128   -32    
16     -96    
-464   176    
80     -224   
48     -16    
32     -176   
16     -96    
-32    -528   
96     240    
-112   -272   
256    -304   
-32    80     
224    -16    
-224   16     
224    -64    
-48    0      
0      48     
-288   -32    
32     -288   
-592   -192   
320    -32    
0      48     
80     -192   
128    80     
96     240    
16     16     
-112   0      
160    -128   
-128   -80    
64     64     
-64    -144   
-208   -256   
-144   -96    
112    -176   
-224   -64    
80     32     
-112   0      
80     -160   
112    64     
32     -1328  
208    48     
128    -144   
-224   -112   
208    32     
-224   16     
-16    0      
-32    -32    
-64    -144   
288    -128   
-176   128    
288    80     
-128   64     
0      -272   
64     64     
48     144    
80     80     
-240   -80    
176    48     
0      -96    
-176   -32    
-112   -48    
16     -32    
-240   -176   
192    -16    
-400   -48    
48     -176   
-48    64     
64     -256   
-32    48     
240    96     
-720   32     
-192   -48    
192    -80    
-128   -64    
48     0      
-32    96     
16     224    
0      128    
-1456  -48    
-80    16     
-512   352    
128    48     
-224   -464   
-64    -48    
-16    16     
-576   -48    
48     64     
-128   -48    
32     48     
192    112    
-96    208    
96     -16    
-240   48     
-160   -32    
-368   112    
176    -48    
-144   -16    
128    -224   
0      0      
-192   32     
112    -64    
-336   -32    
160    -96    
80     112    
-192   0      
48     0      
-16    -144   
48     64     
-224   -80    
-64    80     
-32    -32    
-208   -288   
32     48     
-64    128    
-224   -16    
128    80     
0      112    
16     80     
-192   -48    
32     -32    
32     16     
-704   48     
0      -128   
16     96     
64     80     
-64    -16    
0      80     
-96    -32    
160    112    
48     96     
-16    -32    
-16    112    
16     0      
-64    32     
-112   64     
32     16     
0      -48    
48     128    
0      -144   
80     176    
-112   -208   
-16    16     
-240   -544   
-176   -464   
224    112    
-352   80     
-16    -64    
-144   -96    
112    80     
16     256    
-32    128    
-576   -176   
112    96     
-1088  -32    
-352   -176   
-32    -496   
80     96     
272    240    
16     16     
-80    0      
32     96     
32     -80    
-80    -80    
112    192    
16     96     
-128   48     
-240   -176   
192    16     
64     112    
112    208    
-64    48     
80     -48    
16     688    
272    224    
-416   64     
64     -48    
112    48     
-16    96     
-96    128    
-160   96     
-64    -144   
64     208    
144    176    
-48    528    
112    224    
-32    -80    
-48    32     
-16    -160   
-112   -16    
112    144    
-208   32     
-192   64     
-80    64     
-160   32     
-48    64     
-48    16     
-240   112    
144    16     
-192   -448   
-128   208    
-288   -112   
400    -656   
-32    112    
48     128    
-96    80     
0      -80    
0      -352   
64     128    
-48    -192   
-16    -208   
48     160    
-16    160    
-48    -32    
-80    -256   
-48    464    
80     288    
-32    -32    
448    432    
-352   400    
-48    -256   
176    80     
-208   352    
80     -48    
0      32     
-64    32     
80     32     
-96    176    
-16    16     
48     80     
48     112    
16     -48    
48     144    
48     368    
-80    240    
-16    -32    
224    80     
-80    64     
80     64     
0      48     
0      -16    
-64    80     
-112   64     
144    80     
-48    80     
32     64     
16     80     
32     80     
368    192    
-288   208    
96     80     
208    480    
-64    384    
-176   -96    
208    -128   
-112   -272   
224    -48    
-112   128    
96     448    
0      272    
80     32     
-64    112    
-16    224    
96     48     
0      96     
176    80     
-32    48     
-112   48     
32     48     
128    96     
-144   -112   
208    -16    
-160   -32    
96     112    
64     0      
64     160    
-48    48     
96     160    
-96    96     
0      -208   
32     -128   
-208   96     
288    -128   
-16    -304   
-112   -272   
-144   -464   
160    32     
64     208    
48     -1168  
48     112    
48     112    
-192   -320   
16     -208   
128    80     
-128   80     
32     -48    
-64    -16    
176    160    
0      64     
48     96     
64     32     
-80    -512   
176    48     
-16    1024   
160    -288   
-112   -96    
32     544    
32     -240   
16     208    
64     464    
112    256    
80     -768   
-48    208    
96     144    
-16    128    
112    48     
-112   160    
128    96     
-16    -96    
-32    64     
112    144    
192    432    
-32    176    
288    656    
-16    192    
112    -32    
-80    -192   
-96    -368   
32     -448   
-48    -208   
96     32     
-80    -240   
32     -256   
80     -1040  
-96    112    
304    -80    
0      320    
48     144    
-112   80     
128    48     
-256   -112   
288    16     
160    192    
-160   80     
272    144    
16     64     
208    64     
-304   96     
128    -16    
-80    -16    
-128   -304   
400    -48    
-240   336    
384    112    
-304   -96    
320    128    
-32    0      
144    80     
64     16     
352    112    
-320   96     
288    -240   
-128   48     
416    -80    
-64    80     
-16    -1056  
144    144    
16     -1248  
-112   16     
304    0      
-64    192    
192    -128   
-288   192    
192    0      
-272   -128   
160    80     
64     -48    
96     144    
-192   -80    
32     0      
176    -192   
64     64     
96     64     
288    96     
-80    80     
112    112    
-80    -128   
384    -16    
32     128    
128    -16    
-144   128    
48     -160   
48     64     
48     -512   
32     64     
-32    -32    
144    112    
0      64     
32     64     
-32    -64    
-64    0      
96     -112   
-160   32     
0      64     
-16    -160   
160    96     
-64    -80    
240    288    
-144   -112   
32     144    
160    -80    
176    192    
-16    -1376  
224    96     
48     64     
96     -1104  
48     64     
128    -576   
32     -496   
128    -64    
0      -1344  
96     -208   
176    256    
-160   -64    
112    128    
160    -128   
32     48     
64     -224   
112    -704   
16     -64    
48     16     
64     0      
-224   64     
176    -672   
80     16     
-64    -32    
32     -16    
80     -144   
144    64     
0      112    
176    -224   
96     48     
48     80     
-112   -48    
-80    128    
0      -176   
-64    -192   
-496   -224   
416    -160   
-32    0      
96     -112   
128    32     
-32    -688   
-48    -192   
160    -2992  
-32    -64    
128    -80    
-80    112    
224    48     
-304   128    
304    -192   
-80    -64    
-192   0      
96     0      
-1488  -16    
-16    -48    
0      -112   
192    -336   
176    32     
112    32     
-48    -64    
112    -192   
0      48     
48     -176   
-16    80     
-64    64     
160    16     
-80    64     
48     -80    
-976   -48    
-256   -176   
176    -48    
-64    -112   
128    32     
-80    -160   
-208   -96    
160    -1568  
0      128    
144    -48    
0      112    
144    128    
-128   0      
-96    -80    
80     64     
-256   32     
144    -48    
-1632  -128   
48     -16    
240    16     
-336   -352   
272    0      
-176   -224   
32     64     
128    -16    
-96    -208   
48     80     
80     240    
-288   -16    
80     -128   
176    -32    
224    128    
-448   112    
32     -112   
-800   -176   
96     -544   
128    48     
128    -336   
-48    0      
240    -320   
96     -80    
32     32     
-16    -320   
-160   32     
272    896    
-48    400    
-176   -320   
-80    160    
96     -64    
144    -32    
176    -96    
48     224    
-32    -48    
48     112    
96     -1024  
96     -80    
-720   -32    
96     128    
-128   16     
0      -144   
-160   -16    
-208   -912   
-592   -768   
336    -256   
-112   208    
16     -112   
-160   128    
192    -336   
-96    112    
-144   -240   
240    -336   
48     16     
-80    -336   
-192   -128   
160    -128   
-64    -32    
32     240    
-240   -32    
-112   608    
496    816    
-1200  48     
-256   80     
-160   -160   
-896   -48    
64     80     
-1392  -32    
208    96     
-1440  -48    
0      128    
-128   -160   
176    -144   
-80    -48    
112    64     
-688   -256   
208    224    
-304   -352   
80     -320   
-48    176    
-144   64     
192    -496   
-64    448    
-48    256    
-816   -544   
192    112    
-928   96     
-32    -48    
80     -48    
-240   -64    
-112   176    
288    -160   
-320   -112   
0      304    
-64    -112   
128    48     
-80    96     
-64    -256   
128    -144   
-144   176    
272    32     
-16    48     
-304   32     
240    48     
16     48     
-176   -64    
80     48     
0      -32    
32     256    
-192   16     
-144   16     
-208   -288   
80     -432   
112    144    
-112   400    
112    320    
-672   144    
-96    0      
-240   -32    
-352   -464   
224    -512   
-208   -384   
-64    -432   
-80    80     
32     -144   
48     -288   
-16    -192   
-144   16     
-16    128    
-32    80     
-128   64     
32     256    
128    416    
-224   64     
64     -16    
-16    -80    
112    0      
-336   -240   
224    144    
-48    16     
-32    48     
-16    48     
16     64     
-64    16     
-16    16     
32     64     
80     96     
272    176    
-608   -80    
240    80     
-976   80     
256    80     
-32    448    
48     320    
64     16     
-32    48     
-96    -32    
-128   -224   
-144   -304   
16     -160   
208    80     
-304   32     
144    -128   
-496   -48    
272    160    
-656   48     
48     80     
48     144    
-112   320    
0      32     
80     144    
-272   -208   
-144   -336   
32     128    
0      -416   
-16    64     
-176   16     
176    160    
-112   208    
400    336    
-704   -608   
-144   -912   
112    208    
-16    560    
32     -144   
96     176    
-128   224    
96     -64    
-128   -176   
64     -16    
-272   -336   
352    176    
0      144    
128    -64    
144    144    
-368   -144   
128    16     
-128   -128   
64     112    
0      272    
-32    144    
48     -48    
160    304    
-64    736    
-192   272    
160    208    
48     192    
-16    -96    
-32    -160   
160    272    
-160   -16    
-96    192    
144    112    
64     144    
0      -16    
-80    -16    
32     64     
0      -16    
0      0      
32     -80    
320    480    
-624   -96    
224    80     
-192   176    
96     256    
-80    240    
176    288    
0      -16    
-32    -64    
-48    -160   
160    -112   
-48    256    
-96    64     
192    0      
48     32     
224    112    
-288   -48    
80     96     
-16    -16    
144    96     
-64    80     
32     -432   
-176   -192   
128    128    
-64    48     
16     16     
144    16     
-80    0      
256    192    
-160   -48    
128    64     
-224   -208   
64     32     
-192   -48    
48     80     
32     112    
-16    -16    
64     80     
368    304    
-304   240    
64     208    
32     160    
80     176    
-80    16     
16     16     
128    160    
-192   -16    
16     64     
64     80     
256    0      
-160   32     
-64    256    
272    64     
-64    128    
-128   16     
32     80     
-176   0      
192    144    
224    240    
-144   48     
32     80     
240    128    
-176   64     
-80    160    
80     128    
48     64     
16     -32    
-224   -80    
144    32     
-128   -48    
80     -96    
176    16     
48     160    
128    96     
-160   64     
80     -32    
-144   -16    
-96    -320   
16     144    
-144   -1104  
112    256    
80     -48    
32     128    
-80    16     
-32    80     
192    48     
-224   -48    
160    112    
32     80     
16     -112   
32     144    
0      0      
96     -272   
80     192    
256    -144   
-144   96     
0      -64    
80     -80    
192    272    
304    48     
96     112    
-144   48     
32     128    
-16    192    
-32    0      
96     80     
128    144    
-112   -16    
208    176    
32     -240   
-80    32     
-80    -896   
224    48     
64     96     
16     160    
-32    -224   
96     144    
-208   48     
112    192    
64     288    
0      -16    
96     -32    
48     -208   
80     144    
48     -240   
-16    176    
512    32     
-288   224    
192    -544   
176    240    
-432   -144   
144    48     
48     48     
112    80     
32     32     
16     -80    
176    208    
112    0      
32     64     
16     -128   
-64    -128   
176    -96    
144    80     
0      -1264  
32     80     
112    96     
144    128    
-48    112    
-16    48     
-32    32     
32     -96    
112    160    
0      -192   
176    96     
16     -112   
-32    80     
160    -240   
176    240    
16     -64    
-112   96     
16     -32    
160    96     
-64    48     
80     80     
-16    112    
0      -16    
96     208    
80     176    
128    80     
-192   -256   
192    128    
-128   -416   
64     128    
64     -432   
224    -48    
-128   176    
112    304    
-192   240    
112    192    
160    160    
96     -96    
32     48     
48     -208   
80     96     
48     -192   
112    320    
80     288    
240    160    
-48    128    
304    -1728  
-256   48     
192    -160   
-16    80     
-32    -160   
48     -784   
48     -208   
16     -672   
-32    -160   
128    32     
-80    32     
112    32     
192    736    
-128   -128   
32     -640   
80     -176   
224    560    
176    -320   
48     -96    
-496   -64    
0      -320   
176    208    
-16    -736   
32     -80    
80     -416   
16     -48    
0      -48    
16     -128   
-32    -16    
-64    -176   
240    32     
0      176    
64     96     
48     32     
-416   64     
240    224    
-336   -368   
240    64     
-128   448    
240    160    
-176   -400   
176    -1168  
0      -16    
-160   -272   
352    176    
-32    -64    
272    96     
-208   -352   
-32    -288   
240    16     
-192   -176   
-608   -16    
-16    -32    
64     -112   
144    -80    
176    32     
288    -48    
-64    320    
176    -48    
176    144    
256    -80    
368    192    
-240   208    
480    -288   
-112   192    
112    -96    
-512   -144   
256    64     
-208   -528   
480    -368   
-128   944    
-32    -784   
48     -288   
144    -288   
-240   -240   
48     -192   
-272   -192   
96     672    
144    224    
-400   -720   
368    176    
-128   240    
144    32     
-1376  -640   
160    352    
32     -64    
0      -272   
32     32     
32     -736   
-96    -16    
128    176    
272    -16    
-336   -32    
208    -64    
-96    80     
80     -32    
-96    160    
96     -112   
-416   -448   
256    -288   
-272   640    
-128   -272   
128    -224   
-32    -576   
112    128    
80     -272   
-32    -368   
80     336    
16     -192   
-672   -592   
432    160    
-320   192    
176    96     
-784   -128   
-96    -128   
128    -352   
0      96     
288    432    
-400   -656   
16     -1040  
-144   -880   
272    -256   
-112   96     
560    464    
-336   160    
80     16     
0      -32    
192    -48    
-320   -144   
208    32     
-48    96     
112    -48    
-16    112    
-48    -208   
0      80     
208    160    
-320   -128   
-16    -352   
272    112    
16     288    
0      -176   
-96    -80    
112    -192   
112    208    
48     80     
112    272    
-32    -192   
80     0      
-1104  -288   
-256   64     
-160   0      
-128   208    
-176   80     
-1088  -48    
-128   112    
-112   -96    
-16    -144   
144    -144   
-240   -272   
-128   -112   
80     -272   
-96    128    
0      320    
144    336    
-192   432    
-160   -304   
-432   -672   
-96    -48    
-336   -336   
-208   -208   
-48    0      
-192   128    
240    176    
-208   -64    
-112   -192   
-96    -192   
-16    -240   
64     256    
-240   -256   
48     -560   
-224   -208   
128    -64    
-144   -16    
-112   -144   
144    80     
-592   64     
-80    80     
-272   -96    
0      96     
0      48     
-144   -16    
16     -112   
-96    48     
-80    -112   
-48    -16    
-128   16     
-16    32     
-64    16     
224    96     
48     288    
-528   -128   
32     -96    
-384   32     
192    64     
-176   -64    
96     64     
-144   -192   
-128   80     
-64    64     
-320   -320   
224    96     
-48    80     
16     -48    
48     128    
0      64     
-336   176    
64     32     
-16    0      
288    112    
-176   -16    
128    16     
-80    -80    
112    48     
80     64     
-48    80     
64     80     
-144   -32    
48     -32    
-320   -48    
608    784    
-720   368    
-16    -64    
-176   48     
-16    96     
-1232  -192   
-160   -144   
144    -32    
32     96     
80     96     
64     0      
-144   0      
-224   64     
64     144    
-48    -80    
288    256    
-160   80     
144    0      
-336   -448   
176    32     
-432   -32    
64     160    
-128   64     
112    -16    
0      80     
96     80     
-192   -48    
256    240    
144    144    
-288   -160   
16     -112   
80     16     
16     96     
-176   -96    
48     64     
-64    -192   
96     16     
112    48     
48     80     
-144   -48    
-48    160    
240    144    
-144   96     
112    80     
16     -80    
-208   -112   
128    -128   
96     320    
16     16     
-64    -96    
416    -64    
-192   160    
192    48     
-16    0      
96     48     
160    160    
-80    112    
-48    -32    
16     16     
320    160    
-32    0      
0      -32    
48     176    
-32    0      
0      -16    
-208   -80    
112    -192   
32     0      
240    128    
-16    96     
32     64     
96     -32    
-16    160    
144    48     
-160   16     
-16    -48    
-32    -144   
48     112    
-128   -48    
-208   -352   
64     176    
64     32     
-16    64     
-16    80     
-96    80     
128    128    
-16    176    
-64    112    
112    112    
-176   -48    
32     -64    
48     32     
64     64     
-32    -16    
64     80     
176    208    
-112   208    
-224   16     
272    240    
-64    144    
-144   48     
16     -32    
-16    80     
160    128    
-352   -128   
368    224    
-352   128    
16     144    
-48    -32    
128    128    
0      208    
-80    80     
64     112    
32     -96    
64     -16    
80     -160   
32     -128   
80     -16    
96     64     
-80    64     
256    224    
-176   192    
-144   48     
128    96     
16     32     
240    128    
-176   128    
-32    96     
224    400    
32     304    
-96    128    
80     144    
32     48     
-16    96     
-48    64     
48     192    
-128   -80    
-192   -608   
128    -96    
-64    -144   
112    416    
-64    320    
112    96     
-16    48     
112    -48    
16     176    
-48    224    
48     -112   
80     -96    
-96    -16    
192    784    
-112   -144   
-176   -384   
32     112    
-64    -1008  
16     240    
16     -32    
-16    -320   
160    416    
0      -240   
80     240    
16     128    
-64    144    
48     48     
-80    -96    
-48    -80    
128    -48    
-64    -320   
48     16     
160    128    
96     -96    
-48    32     
16     128    
192    48     
144    416    
112    240    
-48    208    
-32    96     
64     -112   
-112   -432   
224    240    
-64    112    
80     -144   
48     144    
304    -192   
-224   -240   
160    -16    
-336   32     
128    -64    
192    160    
-16    -112   
48     -32    
16     -16    
320    368    
-16    320    
-32    -16    
-240   0      
-32    -256   
320    96     
-272   -208   
-64    -192   
112    -128   
-80    144    
160    -64    
-16    352    
-80    -96    
240    448    
-336   -464   
272    -224   
48     304    
-48    -160   
32     96     
32     -16    
-16    176    
208    -368   
-144   192    
160    -32    
-112   128    
-112   -1600  
-128   672    
352    -256   
-192   416    
-32    -48    
144    0      
32     -16    
208    -64    
-144   -80    
80     -64    
336    176    
-144   64     
80     -64    
256    -128   
-240   -272   
448    -192   
368    1424   
-224   32     
16     -272   
336    -576   
0      -32    
400    400    
-112   176    
272    -336   
256    96     
-80    144    
288    64     
-144   -96    
768    240    
-288   368    
560    640    
-320   -304   
256    48     
240    -272   
-128   208    
-208   -528   
208    -336   
96     576    
-208   96     
384    32     
-80    -32    
208    -224   
-192   160    
256    48     
-16    208    
-192   -176   
64     -848   
-32    -528   
208    -1008  
-256   -176   
-368   176    
96     32     
-112   -112   
112    -656   
224    32     
-48    176    
80     -96    
336    336    
-256   -304   
208    288    
-176   -96    
96     -832   
-80    -32    
112    -80    
48     -64    
-560   -336   
416    -32    
32     704    
96     -480   
288    -64    
-128   64     
0      0      
128    240    
-144   0      
128    -256   
0      160    
16     64     
192    80     
-128   -64    
128    -240   
-560   -64    
96     -208   
-80    96     
80     -80    
288    -32    
-224   -752   
48     -336   
144    -1152  
-112   -224   
288    208    
-288   -48    
176    -80    
-48    96     
-96    -128   
80     -96    
-320   -272   
304    -16    
-1200  112    
16     -96    
-112   -336   
0      -352   
256    16     
0      -832   
-48    32     
0      -48    
16     128    
32     -80    
-16    64     
96     176    
-96    64     
-128   -48    
144    -80    
-752   -128   
192    -160   
-64    -48    
224    128    
-256   -64    
64     -272   
80     48     
240    -368   
-240   96     
160    -192   
32     -16    
160    80     
-80    64     
32     16     
-112   -160   
-192   0      
-48    -160   
-256   -160   
112    240    
-48    48     
0      -448   
208    -48    
32     -848   
112    0      
16     -192   
464    -320   
-96    176    
400    48     
-288   80     
80     -128   
-496   -80    
144    -16    
-160   64     
16     -112   
-224   -64    
128    -496   
-160   -48    
64     -144   
144    16     
128    80     
-144   -16    
16     -32    
48     112    
-80    -32    
-16    0      
-16    48     
-96    -32    
-320   48     
-32    -144   
0      96     
16     -80    
0      80     
-48    -272   
-176   -112   
-160   224    
-176   -176   
-96    -80    
-64    -176   
336    80     
-80    64     
-160   -64    
96     -208   
-48    48     
160    -32    
-160   192    
80     -144   
-48    16     
256    -128   
-592   144    
-256   80     
160    64     
80     80     
240    144    
96     128    
176    -16    
-32    -96    
224    -48    
-80    -192   
144    -352   
368    -80    
-864   -432   
128    16     
-912   -272   
-48    -368   
-224   -384   
32     -160   
64     -96    
-816   -208   
64     -48    
-304   -32    
-224   48     
32     48     
-80    80     
-176   -288   
176    224    
-48    -144   
48     -64    
-176   -16    
144    48     
16     128    
-400   112    
-16    80     
-608   -352   
-64    -96    
-1248  -64    
-48    144    
240    32     
-416   -160   
-96    -208   
128    192    
-240   -128   
-32    112    
-224   128    
16     -80    
-160   -32    
-336   -240   
304    48     
-288   80     
96     0      
-64    0      
96     48     
-368   -112   
112    48     
-96    -144   
128    112    
-96    -144   
0      -16    
-16    -32    
-80    16     
-96    32     
-128   80     
32     128    
144    128    
-224   -16    
-176   -32    
-96    -32    
-16    -48    
16     96     
-16    0      
80     80     
-48    -64    
-16    48     
32     160    
0      -16    
-48    64     
16     192    
-144   -48    
-272   -112   
64     64     
-368   -64    
0      80     
80     -32    
48     -16    
-144   -208   
16     80     
-48    80     
-16    64     
-112   0      
-64    128    
-80    416    
208    -48    
-208   -64    
112    -144   
192    80     
-112   -16    
16     80     
-400   -32    
0      96     
-944   -112   
64     112    
32     32     
32     736    
64     368    
-128   160    
288    832    
-96    32     
-256   -464   
32     -192   
192    288    
-128   96     
48     128    
-48    112    
80     448    
-448   -192   
96     16     
96     320    
-128   -80    
32     -368   
-112   256    
144    -16    
-192   0      
-48    160    
48     -112   
-128   32     
96     624    
-224   -32    
-112   -64    
-16    48     
-416   64     
-32    -32    
16     -64    
-64    368    
16     -208   
-272   -208   
64     240    
80     1104   
-16    704    
-272   -640   
-128   -448   
-208   48     
0      208    
-96    -32    
80     48     
-16    96     
-80    48     
64     -16    
-16    0      
0      -16    
-32    160    
96     80     
-80    48     
16     64     
-16    32     
48     368    
32     144    
-32    144    
-16    224    
208    144    
-128   96     
-16    64     
480    560    
-288   336    
96     96     
48     -48    
-48    640    
304    -160   
-704   -816   
144    -512   
-208   -224   
-96    -368   
80     -96    
-48    192    
-48    304    
304    336    
176    336    
-96    304    
-64    96     
-144   160    
208    -64    
32     -192   
-16    64     
-64    208    
448    160    
-288   80     
224    -16    
96     544    
-144   720    
80     96     
-80    -144   
48     -80    
96     112    
32     176    
304    -80    
-368   -144   
176    112    
176    400    
160    320    
-32    -32    
64     -144   
48     368    
-336   -160   
80     -128   
112    192    
-176   128    
384    368    
-48    240    
48     -224   
128    80     
0      80     
160    -80    
16     176    
32     448    
-32    -224   
-48    80     
-192   -16    
224    -784   
48     -48    
192    400    
-16    112    
80     48     
-32    224    
64     240    
-208   -368   
-160   -16    
-64    -192   
336    16     
-224   336    
0      -224   
-64    -160   
240    0      
16     32     
160    384    
48     -480   
16     -432   
352    384    
16     640    
-16    -112   
160    -32    
16     80     
-160   80     
-32    0      
128    176    
144    320    
144    304    
-80    -80    
32     -80    
0      176    
208    -656   
48     400    
80     160    
144    48     
-160   448    
192    272    
-304   48     
256    32     
64     192    
272    176    
-256   16     
208    32     
96     -192   
-368   -720   
144    -368   
-16    -672   
32     -240   
-160   -48    
96     -48    
64     592    
240    32     
-128   32     
-16    80     
-80    -64    
80     368    
-96    -192   
64     -128   
80     -256   
176    -64    
-96    -112   
272    -624   
32     -80    
80     -256   
16     32     
-192   -256   
256    320    
-96    -416   
-48    -704   
-64    -208   
176    -128   
0      16     
16     -64    
112    128    
-48    64     
144    128    
-16    160    
-112   128    
96     -560   
16     64     
208    -288   
-80    -48    
352    272    
-48    304    
32     160    
0      48     
80     -16    
32     -48    
320    352    
-368   0      
144    128    
128    -128   
0      0      
96     -416   
240    128    
-48    -752   
-144   144    
64     0      
-32    80     
48     -64    
128    32     
64     64     
48     -432   
16     80     
256    0      
-176   144    
128    -16    
-32    48     
0      -112   
128    160    
16     320    
112    112    
-16    -48    
144    112    
16     48     
80     -240   
0      144    
128    144    
160    96     
-96    -16    
128    16     
48     -208   
160    80     
-32    -128   
160    80     
-112   -160   
128    16     
48     48     
-48    -1280  
144    112    
48     -240   
48     0      
96     -32    
-208   160    
224    224    
272    544    
-32    -80    
0      -224   
64     -352   
64     240    
48     144    
0      -1680  
160    144    
-96    -1152  
48     0      
-464   -16    
176    -48    
-128   -144   
224    -96    
-16    -48    
-16    -288   
-48    0      
32     112    
64     -16    
16     -352   
64     96     
-160   -384   
272    80     
64     -192   
-32    64     
-368   32     
-48    -464   
64     -192   
0      -800   
16     -320   
-32    -96    
192    80     
288    -304   
-592   -112   
288    -208   
-320   192    
-48    -48    
-64    32     
32     16     
112    -128   
-448   0      
64     -176   
32     16     
512    256    
0      32     
208    -176   
80     -48    
112    -1712  
-112   -112   
-32    -16    
80     96     
112    80     
-80    64     
-160   -112   
-176   -64    
-112   -32    
-96    0      
-688   0      
224    48     
-144   160    
-80    -112   
48     -32    
144    -16    
272    -64    
-192   32     
304    80     
0      -176   
96     -176   
-160   0      
16     -224   
32     208    
208    -80    
-416   -48    
-64    -48    
-96    0      
-144   -208   
48     -112   
128    -304   
80     160    
0      -1696  
-128   48     
240    0      
16     -32    
-192   16     
144    -144   
-160   32     
0      -64    
-416   -64    
0      -16    
-176   -96    
-80    -96    
160    -112   
192    -208   
-96    64     
240    -544   
-144   64     
96     48     
48     128    
-64    128    
160    -64    
-32    16     
16     16     
-96    0      
240    96     
-192   80     
-96    -272   
-1072  -160   
64     -368   
-64    -320   
-64    -352   
-32    96     
0      0      
-16    32     
-272   16     
-96    -16    
-144   16     
128    -80    
-32    0      
160    -144   
-256   0      
368    448    
96     80     
80     96     
-96    240    
96     -16    
-48    0      
-320   -64    
48     -80    
144    416    
-384   -368   
-32    -336   
96     112    
-80    176    
48     48     
0      -672   
-96    240    
160    144    
-48    -160   
240    64     
-1808  -480   
272    48     
-128   48     
-64    16     
48     16     
32     64     
-80    32     
48     0      
16     -96    
-128   -368   
64     272    
-512   -144   
96     -192   
-80    448    
0      -32    
-32    128    
-176   32     
-144   -64    
-112   -304   
32     -112   
-832   -112   
-32    32     
16     -304   
-128   -48    
32     -144   
-32    128    
80     -160   
0      160    
0      -240   
176    -128   
0      112    
144    -80    
-144   160    
144    96     
-240   -80    
-16    16     
-64    -96    
-528   -176   
112    -384   
-16    112    
16     224    
-80    -528   
-48    -464   
32     -192   
96     -288   
192    -320   
96     -32    
64     176    
-64    144    
16     -80    
-64    0      
-32    128    
32     64     
-48    32     
-480   -32    
288    48     
-224   -16    
176    0      
80     32     
-96    16     
224    208    
-128   208    
0      48     
-32    -112   
240    -64    
-352   -144   
160    0      
-80    96     
-64    -96    
-672   -144   
176    128    
-400   240    
224    -544   
-48    -384   
-224   -80    
128    -192   
-144   -48    
224    32     
-112   48     
176    48     
336    576    
208    672    
-368   -208   
96     -368   
-368   -336   
240    384    
80     -32    
112    32     
32     576    
-80    -384   
-128   -256   
464    784    
-48    1120   
-320   -176   
144    -144   
64     192    
-48    16     
-192   -16    
-128   48     
80     144    
80     96     
-944   -416   
368    800    
144    896    
-144   -48    
96     -16    
112    208    
-384   -240   
-80    656    
-32    48     
160    192    
-336   -368   
-176   -352   
-144   336    
128    784    
48     528    
-544   -144   
-128   48     
-48    192    
240    592    
-160   144    
-112   -320   
-64    -192   
-48    32     
64     16     
0      -48    
-112   192    
16     80     
-48    -16    
-336   -160   
224    112    
16     400    
112    80     
-32    176    
0      32     
0      48     
32     -96    
-128   -112   
32     -208   
-64    32     
192    16     
-112   -80    
-144   -224   
144    -208   
16     80     
96     192    
-32    64     
-144   -224   
128    32     
176    160    
-192   128    
320    320    
-288   80     
0      16     
160    48     
-32    -16    
-80    -16    
-16    -32    
16     -32    
-160   144    
288    448    
-496   48     
-80    32     
256    80     
-112   112    
-112   64     
0      160    
192    -16    
-144   -64    
96     64     
-80    -48    
16     80     
128    32     
-80    48     
-208   -160   
208    16     
64     64     
112    240    
-64    64     
-64    32     
32     32     
144    208    
-240   32     
48     64     
80     80     
-16    32     
144    128    
-144   0      
128    240    
-16    128    
96     48     
-48    304    
48     -16    
-144   -48    
96     80     
48     -80    
-112   -64    
176    144    
272    224    
-160   32     
96     32     
32     96     
0      16     
0      80     
144    48     
-32    32     
64     32     
0      32     
16     64     
80     -32    
-32    48     
-32    96     
144    32     
-32    112    
208    80     
-240   64     
0      0      
112    -64    
16     -208   
32     16     
-144   32     
144    64     
-48    64     
64     112    
48     112    
64     48     
224    192    
-160   224    
-112   16     
80     64     
64     -48    
16     16     
80     -144   
64     -144   
-48    64     
64     -128   
96     80     
-48    16     
0      80     
192    32     
-272   -32    
368    -32    
-128   160    
48     16     
-160   160    
256    64     
-64    128    
64     80     
-96    -336   
224    256    
-128   -928   
0      128    
128    64     
64     80     
16     176    
176    192    
-160   48     
48     48     
0      -272   
0      128    
208    -64    
0      128    
-48    -32    
-32    -144   
224    48     
0      0      
0      96     
64     224    
-48    144    
160    176    
128    80     
-48    80     
272    112    
-32    32     
176    16     
-96    -16    
96     64     
0      128    
128    48     
-64    48     
160    -128   
-80    48     
128    -480   
-48    64     
80     0      
0      112    
256    144    
-16    96     
-32    -48    
496    448    
-448   48     
192    -224   
-112   192    
160    -208   
-128   16     
128    -288   
32     80     
80     -672   
-16    80     
112    -1104  
-304   -16    
160    -16    
144    240    
16     48     
-80    32     
240    160    
0      80     
80     112    
-80    -208   
96     -48    
96     -112   
96     128    
48     -16    
-16    64     
32     -320   
128    80     
16     -32    
-48    192    
272    -48    
0      16     
208    208    
96     -752   
-16    80     
160    -32    
208    192    
-320   -32    
288    304    
-320   -336   
208    128    
-176   176    
-32    160    
160    32     
224    256    
-304   240    
-80    -256   
224    16     
160    -64    
128    256    
16     -16    
144    16     
-64    -240   
128    32     
160    -240   
96     128    
48     -608   
144    -96    
-64    128    
192    -1072  
-432   -16    
160    -192   
16     80     
160    0      
-32    -112   
112    -32    
-16    48     
0      16     
32     64     
-32    32     
96     -816   
-64    -64    
0      -944   
80     -176   
-64    -384   
224    -736   
-240   272    
288    272    
0      0      
0      -624   
160    -64    
32     -2336  
176    -192   
176    304    
-64    -16    
112    32     
64     16     
-32    -96    
320    -64    
-96    208    
256    -32    
-672   -176   
336    -128   
-32    -96    
80     -512   
16     48     
16     -672   
-32    -384   
272    192    
-208   -288   
288    -448   
-208   128    
176    -16    
80     -64    
64     16     
-16    -64    
-96    0      
80     0      
0      -16    
32     -32    
128    0      
64     -112   
96     -32    
64     -544   
144    -16    
64     -160   
-64    -32    
192    -320   
32     192    
-112   80     
304    -64    
-480   128    
160    -48    
-496   16     
96     -64    
0      -128   
208    48     
-224   48     
128    -368   
240    64     
16     96     
176    192    
160    160    
-96    -48    
-96    -16    
-96    -80    
48     -32    
144    128    
-240   -80    
176    -176   
-384   -144   
-16    -320   
-208   -32    
0      -176   
112    64     
-128   -768   
80     64     
-96    -64    
64     64     
-16    0      
144    976    
0      512    
-80    -80    
112    64     
64     464    
-272   0      
48     -48    
32     144    
96     -160   
-144   -48    
128    -672   
128    64     
48     144    
0      -80    
32     0      
0      -64    
-112   32     
-32    -96    
144    320    
-208   32     
160    304    
-128   -368   
-48    -272   
112    -384   
-32    -96    
128    -400   
-80    -112   
-240   -48    
160    -112   
-1120  -1184  
32     -640   
320    928    
-592   480    
32     -688   
-80    144    
-224   160    
-64    -416   
160    208    
304    -208   
-80    576    
128    128    
-32    -224   
-64    48     
-64    32     
64     0      
-144   -288   
64     256    
48     304    
-128   -144   
16     -96    
-304   -208   
64     -192   
64     272    
-1088  128    
48     48     
-640   -144   
-464   48     
48     96     
-112   -32    
-16    -48    
-144   0      
32     368    
-128   160    
-144   32     
0      48     
-64    448    
-400   192    
-48    112    
-64    -112   
160    160    
-80    32     
-240   384    
-528   192    
16     -16    
-16    80     
-256   0      
-288   -96    
384    -16    
-368   -304   
176    -128   
112    -16    
-400   80     
96     -16    
-416   -208   
96     16     
128    400    
-80    16     
192    112    
-112   160    
256    96     
-656   -96    
16     16     
-16    64     
0      64     
-48    0      
96     112    
-240   -96    
144    144    
48     112    
-160   144    
0      160    
176    176    
208    0      
-336   -32    
112    64     
-16    176    
-288   -16    
16     -32    
192    32     
-128   -80    
32     -96    
-48    -112   
80     96     
-112   0      
-16    96     
112    96     
-272   176    
80     -16    
-64    64     
80     48     
-176   -64    
16     80     
48     16     
-112   16     
-64    -96    
-112   32     
80     160    
-112   0      
176    -32    
160    144    
80     16     
32     64     
16     192    
-112   64     
-32    80     
-16    32     
0      0      
32     128    
80     -16    
-160   0      
224    192    
32     -32    
96     192    
-128   48     
-48    -16    
32     64     
80     176    
144    128    
-192   -48    
64     48     
-160   32     
-48    -16    
-112   -32    
-144   -96    
-160   0      
128    304    
-336   -80    
-368   48     
-128   -64    
48     128    
0      80     
-64    112    
192    -48    
-144   32     
-240   -48    
224    -128   
-48    -48    
16     16     
-112   144    
-80    0      
-16    96     
-48    80     
144    64     
-80    -16    
96     48     
-176   -32    
112    -96    
0      80     
176    112    
-224   144    
16     80     
112    160    
-128   -16    
144    96     
-112   -16    
48     128    
-48    128    
96     144    
112    64     
32     32     
96     96     
-32    48     
-32    -32    
176    80     
-32    80     
-128   16     
176    0      
-112   -80    
240    240    
-320   48     
128    -48    
32     80     
48     16     
-96    96     
128    96     
16     80     
-32    48     
0      80     
-64    32     
16     0      
-96    -64    
-16    64     
-64    32     
128    64     
-80    -96    
96     80     
-64    32     
80     96     
-160   -80    
256    0      
144    176    
16     96     
-64    16     
-80    -64    
112    -48    
-96    -112   
128    -16    
48     64     
-80    176    
128    128    
-144   128    
96     64     
-16    0      
16     16     
224    272    
-160   224    
80     112    
-192   32     
160    -48    
48     192    
96     16     
16     128    
-80    -16    
96     128    
288    320    
-208   272    
16     128    
0      96     
-16    -32    
160    128    
16     48     
-128   0      
128    64     
0      112    
-32    -32    
-32    128    
144    160    
-160   -64    
-144   -2064  
576    368    
176    176    
304    208    
-272   304    
160    64     
-176   48     
-64    -16    
224    -48    
-128   80     
272    0      
-64    112    
160    80     
-96    112    
96     0      
-80    -112   
128    -32    
240    240    
-192   112    
-80    16     
80     112    
432    448    
32     240    
-128   64     
160    16     
-160   -32    
240    16     
-64    -144   
176    -16    
64     240    
112    16     
-352   96     
208    80     
-32    96     
96     -48    
-48    64     
400    224    
-192   192    
112    112    
16     80     
128    -576   
80     -112   
160    -64    
80     0      
-32    96     
192    -16    
-16    96     
-160   -784   
-32    96     
128    -80    
16     160    
80     -96    
32     160    
-64    -320   
96     0      
-144   -224   
80     272    
128    128    
-112   192    
48     16     
32     -160   
128    128    
48     -16    
80     64     
64     -64    
176    336    
-352   -368   
240    -144   
-16    736    
80     80     
192    -80    
-160   32     
32     32     
-48    -288   
288    192    
128    64     
-32    176    
112    144    
-96    -32    
112    -512   
-16    -224   
-32    -176   
144    128    
-16    16     
80     144    
-32    -64    
0      -96    
128    -128   
448    288    
-144   592    
32     0      
48     96     
-16    -48    
176    -16    
-48    -144   
176    96     
-64    32     
128    96     
96     -16    
64     128    
-16    64     
96     96     
64     80     
32     64     
64     112    
160    160    
-160   -272   
16     -304   
144    -64    
208    112    
64     192    
64     48     
112    96     
-80    -112   
128    96     
160    256    
-208   96     
112    32     
112    -160   
32     64     
160    -96    
16     128    
112    -128   
128    128    
-64    -304   
48     32     
32     -1328  
16     48     
32     -96    
-16    -336   
80     -272   
144    192    
48     496    
64     -48    
144    208    
-176   -224   
240    -48    
-128   -352   
80     -544   
-80    -960   
112    128    
384    -48    
96     -240   
160    176    
16     -288   
160    -896   
-32    0      
128    -448   
32     48     
-48    -64    
304    304    
48     992    
-48    -272   
80     -112   
176    80     
-32    -224   
192    128    
0      1168   
-80    -608   
-32    -800   
224    48     
-512   -192   
128    -624   
96     48     
128    -272   
-48    -176   
80     -2544  
-80    176    
112    544    
48     -48    
-256   -544   
32     -32    
16     16     
-32    112    
0      160    
208    -64    
-576   -240   
128    -96    
144    -96    
176    -64    
-128   -400   
224    -48    
176    -16    
48     -240   
208    -16    
-48    -208   
-64    128    
-48    48     
64     48     
-240   -80    
240    -224   
-480   -48    
192    -96    
-112   -112   
80     -192   
32     32     
208    -80    
320    112    
-224   -1296  
32     -720   
48     -672   
320    112    
48     144    
128    -48    
64     -80    
32     0      
-32    -48    
-112   -192   
-416   64     
-80    32     
224    0      
48     -80    
-128   -176   
96     -864   
-48    16     
208    -112   
-80    160    
112    -96    
64     -48    
176    368    
240    176    
-304   -16    
112    16     
-128   128    
-176   16     
16     -352   
784    128    
-368   -176   
480    -288   
-176   144    
368    -352   
-320   96     
192    64     
-16    -96    
-128   16     
64     64     
160    224    
-64    -112   
-128   48     
80     -256   
-336   0      
-32    -32    
-336   112    
176    -112   
-176   32     
224    -848   
16     112    
-64    32     
-32    32     
48     -48    
-64    0      
-880   -48    
272    -96    
-272   0      
240    32     
-192   192    
-160   -160   
32     128    
192    -432   
-96    48     
128    -176   
-16    -112   
-128   48     
0      48     
-48    64     
80     16     
-256   -80    
80     -48    
-80    0      
-32    0      
-1088  0      
336    -176   
32     96     
112    -176   
112    48     
-192   -112   
32     128    
-304   -16    
96     80     
80     -80    
-80    -32    
160    64     
64     16     
48     16     
-16    -208   
-176   48     
144    -48    
-48    64     
-112   -128   
64     112    
80     80     
-144   -64    
-160   -16    
-288   80     
160    96     
-256   48     
-48    -16    
-32    -96    
192    64     
112    48     
-80    64     
-336   -80    
80     16     
-96    -96    
112    112    
-192   64     
-112   -176   
128    -96    
-208   112    
192    272    
-416   48     
-144   -64    
144    -16    
-64    48     
-16    -16    
0      48     
-128   -64    
16     -16    
32     0      
-160   16     
-112   80     
-64    32     
0      80     
-64    16     
128    48     
-272   80     
-176   0      
-480   176    
128    96     
-80    0      
48     96     
-112   -192   
-32    32     
-48    -208   
-80    80     
-32    112    
-48    32     
64     -16    
-192   -64    
-176   -32    
-128   0      
32     208    
-80    -16    
-176   80     
-288   -112   
-160   144    
112    -80    
-240   32     
0      32     
0      128    
48     64     
48     64     
-112   -48    
-16    -160   
-112   0      
144    -64    
-128   64     
-160   -176   
160    48     
-1232  -32    
208    64     
-128   -64    
240    128    
80     144    
80     336    
304    464    
-528   -80    
112    32     
176    288    
-48    256    
-128   -160   
-256   -208   
-32    -144   
32     128    
208    -64    
-144   96     
160    -80    
-224   176    
176    -96    
-160   -96    
144    80     
80     64     
64     288    
-256   -144   
16     -80    
32     96     
-32    48     
-224   -240   
-32    -272   
-240   -32    
176    64     
-64    -128   
-80    -48    
-32    0      
16     -160   
224    304    
-240   32     
32     -32    
-352   -112   
-32    -112   
-240   -96    
-192   -224   
-16    -448   
-64    -176   
16     352    
-160   -128   
16     112    
48     -96    
-16    112    
64     112    
-16    96     
16     48     
64     112    
128    320    
-304   -192   
-64    -384   
64     224    
-48    432    
192    336    
-176   32     
-16    64     
224    -16    
-304   -64    
48     -256   
-96    -256   
128    208    
-48    64     
144    336    
-80    160    
-176   -128   
176    -48    
-48    176    
192    288    
-352   256    
-48    -816   
512    -176   
0      880    
-112   -128   
144    224    
32     32     
48     80     
-160   208    
-64    -320   
336    96     
-32    224    
-160   320    
768    288    
-768   -112   
176    -496   
-16    240    
160    304    
80     96     
-128   32     
16     112    
-16    -16    
-128   48     
304    112    
-96    48     
-48    16     
0      80     
-112   144    
80     -16    
-160   -288   
208    128    
-80    -16    
-224   -320   
240    80     
-144   432    
496    96     
-352   80     
128    -320   
-144   16     
-48    -112   
-208   -352   
128    192    
-144   -160   
-64    112    
128    80     
-32    -16    
96     128    
-48    96     
80     112    
80     144    
96     160    
-48    0      
176    432    
32     448    
32     448    
-32    240    
-96    -192   
304    32     
-144   64     
256    0      
-160   -1424  
32     96     
96     64     
80     96     
-16    64     
96     64     
-16    64     
48     80     
-112   -32    
464    256    
-352   128    
304    112    
-384   -128   
224    -288   
-96    -192   
-176   -224   
64     -128   
-96    -112   
-48    -128   
-16    -288   
64     16     
144    192    
-96    32     
80     48     
272    368    
-176   672    
-112   -32    
-16    -688   
48     592    
192    -80    
-144   16     
160    320    
112    -368   
-144   256    
256    32     
80     352    
-128   -16    
-16    -240   
128    752    
16     -80    
64     480    
160    288    
-352   -432   
96     224    
208    400    
-176   -208   
128    48     
32     -1312  
48     240    
32     -112   
96     -160   
176    128    
96     336    
-320   -80    
256    -688   
-48    336    
256    512    
-128   288    
0      -368   
128    -320   
368    320    
-128   384    
-16    -352   
224    48     
0      272    
80     32     
-80    -336   
48     400    
64     112    
-80    16     
96     -208   
304    288    
-288   288    
16     -96    
-96    256    
48     48     
64     208    
80     -16    
64     64     
16     -224   
48     112    
160    -16    
-336   0      
160    -32    
-32    144    
-48    32     
48     64     
16     112    
64     240    
80     304    
-32    -32    
240    80     
-64    -272   
64     -160   
-80    -160   
128    96     
16     -336   
64     160    
16     16     
96     272    
-144   -16    
48     192    
0      -16    
-48    -592   
0      240    
288    -864   
-48    96     
320    -400   
16     -16    
336    -112   
48     144    
112    -368   
80     48     
32     144    
96     208    
-48    64     
32     48     
160    48     
-112   -256   
288    80     
-336   -384   
208    -176   
-176   -256   
-64    -112   
32     -272   
112    48     
208    -32    
80     -16    
128    144    
160    272    
80     304    
-64    -128   
144    -288   
64     -128   
-272   -80    
-16    -144   
-32    64     
64     -80    
-128   -256   
-128   -320   
208    176    
-80    160    
176    64     
96     384    
-336   -160   
144    -368   
48     -240   
112    -528   
128    80     
144    -272   
-32    -16    
-96    -64    
416    -336   
16     144    
272    -176   
48     -128   
80     48     
96     -192   
0      0      
-464   0      
128    -256   
-848   -32    
144    32     
16     0      
32     32     
64     -16    
-16    -320   
32     -176   
32     96     
176    192    
-16    -32    
112    80     
32     -208   
32     208    
224    48     
-208   -48    
-80    16     
0      -128   
160    -80    
96     -144   
-32    48     
160    -208   
64     48     
-16    -864   
240    80     
-32    -112   
-80    0      
32     -160   
96     -208   
-32    176    
304    16     
-528   -48    
272    -208   
-96    -80    
160    -96    
-112   -32    
112    -208   
160    32     
-176   -1536  
-80    16     
-80    -128   
-112   224    
176    -48    
208    80     
-208   80     
64     -176   
-128   -272   
16     -64    
-560   -48    
128    96     
-48    0      
240    48     
-64    16     
32     -192   
112    96     
64     -64    
64     144    
-80    -32    
-80    -192   
-16    -16    
144    -176   
-128   -16    
112    -64    
0      80     
80     -176   
-320   -32    
16     -288   
48     48     
-16    -400   
48     64     
160    -1200  
144    192    
-208   16     
32     -48    
32     -80    
96     -48    
128    144    
48     0      
-848   -96    
0      -192   
-880   -64    
-48    -160   
16     -16    
48     -256   
-192   -432   
272    -848   
16     -416   
-176   -96    
208    0      
-96    80     
320    160    
-432   -16    
144    64     
-96    -96    
112    -64    
-144   -16    
256    16     
-96    -32    
128    -448   
-128   144    
384    -512   
-272   -240   
80     -464   
64     -80    
0      192    
208    64     
-176   0      
128    0      
-128   -128   
448    400    
-240   64     
16     -272   
128    656    
80     -560   
-16    112    
-48    240    
240    240    
-16    -160   
336    -304   
16     96     
-112   80     
-288   -384   
32     -112   
48     176    
48     64     
-256   16     
-192   -128   
-48    96     
-448   -208   
240    80     
144    320    
-288   -400   
-112   -160   
-688   176    
-192   -112   
32     144    
16     224    
128    96     
-208   -112   
-384   -256   
48     -240   
-192   -288   
176    144    
-240   64     
-64    -32    
64     272    
-512   320    
-64    -144   
-496   -224   
224    176    
112    592    
-272   -240   
224    -272   
0      160    
96     -96    
-192   128    
0      -16    
624    -16    
-448   -112   
192    -288   
-464   -112   
272    -880   
368    544    
-144   416    
-176   -144   
-16    -16    
-192   416    
-736   -64    
400    -112   
-96    464    
32     400    
-400   -528   
208    112    
-160   192    
-80    144    
64     -32    
-384   -368   
448    480    
-272   -16    
80     672    
-448   -240   
16     480    
-192   32     
32     -304   
-96    176    
32     368    
-112   -320   
16     160    
-32    -80    
112    496    
-208   128    
16     -160   
-160   64     
-288   -112   
160    -160   
-112   -16    
128    144    
-160   48     
112    160    
-688   -96    
48     144    
96     -80    
-144   48     
48     48     
-64    -112   
112    336    
-208   64     
64     -160   
368    464    
-160   -272   
32     656    
-80    -64    
-240   -416   
-16    288    
-288   -64    
-32    96     
96     0      
-64    80     
-32    32     
160    832    
-80    96     
-176   -16    
208    304    
-16    -240   
-48    256    
-48    -32    
-16    -560   
-176   336    
352    416    
-448   96     
272    32     
-112   -432   
64     -160   
0      128    
-80    -208   
224    16     
32     112    
128    48     
-192   16     
-16    16     
-128   16     
0      48     
-48    0      
96     128    
-144   -16    
384    336    
-160   400    
-240   160    
-128   -144   
-64    -352   
80     80     
-112   96     
-32    -32    
-128   112    
48     16     
-16    432    
-64    224    
-48    -176   
-16    176    
-128   0      
-128   128    
160    576    
16     -176   
-80    -224   
80     -32    
16     -176   
128    48     
-112   80     
192    496    
16     144    
-16    64     
112    288    
32     96     
0      128    
-160   0      
96     144    
32     96     
-176   224    
176    640    
-416   -64    
272    -48    
240    240    
-144   -32    
-16    -96    
16     -96    
-112   -112   
-48    48     
16     96     
80     96     
-32    -64    
16     64     
80     128    
-128   64     
-128   48     
176    144    
-160   128    
-64    64     
-128   48     
16     -32    
-112   -48    
32     96     
-112   80     
32     -32    
112    96     
16     160    
-16    112    
352    304    
-352   224    
-96    -32    
-144   208    
256    -64    
16     -80    
-32    48     
48     112    
-32    160    
-64    112    
64     112    
-192   -16    
128    -32    
-96    64     
16     16     
-96    80     
96     128    
32     -16    
16     -16    
112    80     
16     0      
0      16     
80     16     
192    288    
-304   0      
176    32     
48     -144   
16     -2096  
80     80     
128    80     
32     128    
80     112    
-32    128    
368    384    
-496   144    
256    128    
-32    -16    
144    32     
128    -304   
-256   -624   
288    128    
16     448    
-48    -640   
112    32     
368    288    
-160   -48    
-32    -80    
64     -16    
128    128    
32     80     
256    368    
-80    224    
16     -16    
-16    -64    
112    -80    
160    -16    
112    64     
240    -48    
192    32     
16     144    
-32    160    
-96    64     
144    112    
-208   144    
320    240    
-240   160    
-16    -112   
-64    -48    
144    0      
208    0      
176    48     
96     32     
-16    -256   
528    448    
-528   -1008  
160    16     
-208   160    
400    16     
-144   -16    
16     64     
-48    -288   
-96    0      
112    32     
128    96     
-128   32     
0      -112   
128    112    
-176   -320   
224    176    
16     -368   
96     176    
96     368    
80     48     
112    -64    
112    80     
32     96     
32     80     
144    96     
80     224    
-176   112    
80     -80    
128    48     
176    128    
192    80     
-128   -48    
208    96     
160    -1136  
-80    64     
144    192    
-32    128    
48     64     
32     160    
96     160    
-64    144    
32     96     
112    -80    
112    112    
160    -16    
16     64     
32     -304   
-112   -16    
112    -1056  
112    0      
16     96     
160    96     
48     32     
0      80     
-32    -32    
192    112    
192    192    
-64    16     
96     64     
-48    -304   
16     80     
-32    -272   
96     96     
-32    -16    
128    -16    
576    384    
-80    304    
-224   208    
128    32     
16     16     
96     -176   
0      64     
0      416    
192    272    
-48    128    
80     -32    
96     192    
176    240    
48     -32    
16     272    
48     -640   
96     288    
32     112    
48     -304   
96     -992   
128    528    
48     -2128  
-96    -112   
272    96     
-256   -432   
96     160    
32     -80    
-48    208    
32     -112   
0      -2016  
256    304    
-240   -288   
-96    -48    
16     -192   
16     -256   
32     -272   
32     -720   
32     -160   
48     -496   
-32    144    
48     -544   
16     -96    
32     -192   
0      -48    
144    64     
-80    -48    
96     -16    
0      80     
-192   -32    
32     -192   
-496   -16    
96     -176   
-112   -80    
128    48     
-112   -128   
96     -1648  
64     0      
-32    144    
80     -80    
-48    -416   
-80    -16    
64     0      
-96    16     
-144   -512   
192    208    
-592   208    
96     -336   
-176   -320   
-128   -400   
240    -256   
-64    -608   
336    224    
-64    80     
160    240    
-112   -464   
416    -112   
-128   144    
160    -112   
224    304    
128    368    
-144   144    
48     144    
224    0      
0      16     
-240   -720   
352    -80    
0      272    
16     -336   
240    256    
48     -64    
80     96     
416    192    
-144   64     
-32    64     
0      -160   
272    -192   
112    192    
-64    -80    
208    32     
-128   160    
176    -416   
0      32     
560    288    
-528   -320   
80     -640   
-80    96     
352    464    
-128   112    
-144   -400   
48     -192   
-96    368    
0      96     
-816   -288   
0      -1056  
256    288    
208    -288   
-416   176    
-128   -1008  
288    -80    
-144   -1792  
320    256    
144    704    
-448   -656   
112    -832   
128    432    
112    112    
192    32     
-368   -32    
192    48     
128    288    
16     320    
-288   -560   
272    -224   
64     432    
-48    -144   
192    -128   
64     -240   
96     -80    
-192   -368   
352    16     
-160   -80    
112    -320   
-112   160    
272    -288   
-688   320    
80     -112   
128    240    
-16    -96    
-176   -64    
-160   32     
144    -544   
-160   288    
-96    256    
-256   -96    
208    352    
-240   208    
-32    -96    
-80    -48    
144    464    
-464   -48    
-144   -288   
32     464    
-192   -544   
48     32     
144    272    
-624   -128   
240    0      
-624   512    
176    208    
-160   32     
-64    -48    
-128   -576   
368    336    
64     608    
-96    256    
-1152  -352   
-64    -192   
-176   -224   
128    576    
-208   -176   
-368   -416   
0      192    
-128   144    
256    448    
-528   -272   
64     16     
208    64     
-208   -48    
32     -112   
-80    96     
-352   -112   
144    96     
-48    -80    
-48    80     
-160   -144   
-272   -112   
-144   -32    
96     0      
-16    -176   
-160   -240   
-16    -160   
-672   -656   
-96    -192   
-16    -240   
64     48     
-32    -176   
144    48     
80     176    
-80    32     
-48    -80    
-48    -112   
-32    -192   
64     64     
0      0      
-48    32     
-16    80     
-864   -32    
16     192    
96     48     
-96    96     
-112   -96    
-48    48     
32     -112   
-96    32     
-32    0      
-80    32     
208    80     
-64    64     
16     32     
-160   16     
96     112    
-288   -16    
112    416    
80     112    
-224   48     
128    -128   
48     96     
-64    80     
-32    96     
48     160    
-32    16     
-224   112    
96     -32    
-128   32     
32     32     
-48    64     
-144   -48    
80     80     
-336   -96    
400    368    
-352   96     
-16    0      
48     -384   
176    32     
64     288    
-448   32     
160    -32    
-80    80     
336    304    
-400   192    
-32    -112   
-208   -32    
96     160    
-368   -80    
96     80     
0      64     
-64    32     
48     288    
112    256    
-64    304    
-16    -16    
-16    112    
-16    16     
112    64     
-272   32     
304    144    
-352   -112   
176    64     
-464   -48    
256    256    
-80    -64    
-224   64     
272    -32    
144    96     
0      16     
64     80     
0      -16    
-32    80     
-96    64     
-160   0      
-32    -48    
-208   0      
480    576    
-368   -240   
192    -160   
112    128    
-32    16     
-48    0      
48     64     
0      -48    
-64    -16    
32     272    
32     96     
-176   -64    
48     128    
144    128    
64     32     
112    96     
160    256    
-336   128    
288    144    
-272   96     
112    -48    
-160   16     
224    80     
-208   -112   
272    -16    
-224   80     
576    144    
-448   64     
416    128    
-272   -16    
-160   144    
64     80     
-32    96     
144    64     
-48    48     
-160   0      
112    -96    
-80    16     
32     32     
272    272    
-336   96     
112    144    
-64    32     
128    96     
-224   -16    
-112   160    
144    -48    
-96    32     
208    176    
-176   -80    
-80    48     
16     80     
64     96     
128    112    
-16    16     
144    96     
80     160    
160    32     
-80    -32    
80     32     
-16    112    
128    112    
64     0      
0      48     
-48    160    
112    192    
48     160    
-16    -16    
-48    -80    
224    224    
0      160    
-144   112    
-80    0      
208    48     
16     -112   
80     368    
-64    288    
-32    128    
48     -64    
144    144    
64     -112   
-144   112    
160    432    
-208   208    
-112   -112   
-96    -272   
32     -32    
48     -16    
16     -144   
-32    -32    
16     -2096  
16     96     
80     80     
-32    208    
128    144    
-16    32     
112    -16    
128    64     
32     64     
32     64     
16     48     
96     112    
-48    32     
32     80     
80     464    
176    48     
-144   -144   
224    464    
-160   32     
-160   -32    
160    -272   
-64    496    
-112   -336   
-32    -16    
64     80     
-96    288    
128    -80    
-32    16     
176    -208   
-80    224    
0      -112   
96     0      
48     96     
64     192    
32     -32    
96     144    
-16    224    
-16    32     
-144   -272   
144    16     
-16    -96    
32     176    
16     48     
16     -176   
32     96     
-16    -64    
48     -160   
80     -1312  
192    480    
64     240    
-64    -16    
48     -32    
-32    0      
-16    32     
16     112    
80     64     
0      80     
48     80     
96     -32    
48     112    
112    -112   
32     96     
48     -272   
32     112    
96     -336   
-32    48     
16     -256   
112    112    
320    384    
-80    256    
112    128    
16     176    
32     128    
128    -256   
32     16     
192    -192   
-400   -400   
448    -624   
16     16     
112    -1184  
368    -160   
64     -48    
256    288    
96     112    
160    512    
464    144    
-352   -256   
160    -144   
448    -192   
176    480    
256    -112   
-96    -112   
304    -864   
-48    32     
-176   -384   
224    -400   
320    -272   
32     256    
-288   -464   
400    160    
-48    416    
224    -416   
64     576    
-192   -80    
160    -176   
-80    16     
16     -192   
-208   -192   
224    272    
48     192    
32     -64    
112    -16    
512    480    
-304   144    
160    -208   
448    496    
-192   -128   
304    96     
-496   -752   
176    -208   
160    224    
-128   32     
176    -288   
-96    400    
224    128    
-80    -128   
-32    -16    
144    -1744  
-176   -368   
128    -704   
336    -16    
16     144    
80     -352   
-64    -224   
96     288    
-352   -752   
672    128    
-384   512    
-64    -592   
240    -928   
192    -784   
352    272    
-64    16     
80     -32    
80     -48    
208    -288   
176    144    
-144   -272   
272    -400   
48     -144   
208    -32    
80     528    
16     -96    
-224   48     
80     -96    
96     -32    
-160   -64    
-176   80     
144    -16    
-128   -96    
80     -288   
-1120  -160   
0      -320   
-32    -96    
0      -256   
-128   -160   
0      -1120  
-32    -272   
112    -128   
-16    -192   
-16    64     
112    112    
0      -272   
-16    -32    
-160   64     
64     -64    
-528   -176   
48     48     
224    -96    
32     -400   
336    -64    
144    -192   
96     112    
64     0      
112    -32    
176    0      
0      -208   
208    -496   
160    -80    
240    32     
-176   -48    
96     160    
-112   -224   
32     32     
160    -128   
-80    96     
96     64     
-96    16     
240    -784   
128    48     
32     128    
224    416    
-96    336    
160    208    
48     160    
64     48     
-176   -96    
-48    -352   
-464   -128   
-112   -16    
208    -32    
-160   -176   
-32    -288   
-80    -768   
560    -48    
-160   32     
-64    -144   
16     -192   
272    -80    
-192   64     
-32    0      
-64    32     
0      -64    
-224   96     
176    128    
64     -144   
96     -96    
176    -16    
48     -112   
96     80     
0      -944   
160    -80    
-48    16     
112    32     
-160   32     
32     -32    
-112   64     
144    80     
-144   -32    
112    -48    
-160   -32    
32     -112   
0      80     
112    48     
112    16     
32     -1360  
64     16     
-288   -16    
-160   -16    
144    48     
16     112    
-304   -128   
304    -368   
-544   0      
208    -48    
-144   96     
96     -80    
-192   48     
256    -112   
-32    64     
-32    -16    
16     -16    
-32    -32    
32     16     
0      -48    
32     -80    
-144   -48    
-16    -48    
-96    80     
96     16     
48     160    
-160   16     
16     64     
-1136  16     
32     48     
-304   -112   
144    -16    
80     288    
-1424  -96    
-80    0      
96     -144   
-16    -16    
32     -32    
-128   -32    
-144   -112   
-32    176    
-144   -256   
208    128    
-208   -144   
208    16     
-128   32     
-208   48     
96     272    
-832   -96    
-112   -128   
-16    -192   
0      112    
-96    160    
128    -16    
-192   -48    
288    112    
-272   -176   
208    272    
48     -48    
80     80     
-112   32     
-272   -384   
-32    -64    
-224   32     
64     0      
-48    80     
-80    -304   
-560   32     
112    224    
-336   -176   
-80    -256   
64     48     
64     128    
-128   32     
-208   80     
96     16     
-256   48     
80     32     
176    128    
0      16     
-112   -16    
288    176    
-352   -32    
16     48     
48     -32    
16     -64    
96     16     
16     64     
-304   128    
-80    -144   
96     96     
48     -16    
0      96     
-16    32     
-16    0      
-176   -48    
176    48     
-512   64     
16     80     
16     16     
160    128    
-256   -272   
-48    -32    
144    48     
-64    128    
32     32     
256    256    
-368   96     
80     48     
-160   16     
96     80     
-48    -16    
96     -80    
576    448    
-1328  16     
144    96     
0      -80    
144    32     
256    64     
-64    -80    
160    32     
96     16     
96     96     
32     80     
-16    96     
96     176    
-64    80     
-320   -160   
-16    -16    
-432   -80    
368    272    
-112   -32    
-96    288    
-80    144    
16     176    
0      0      
-112   -48    
-32    -560   
192    32     
-176   0      
-256   -544   
240    32     
-480   -256   
416    432    
-304   16     
-32    -496   
144    192    
-128   16     
288    544    
-448   432    
208    -176   
-112   -16    
0      -96    
240    336    
-208   112    
-80    -96    
128    80     
-112   16     
32     64     
-64    32     
48     32     
-176   64     
112    32     
-32    64     
48     64     
-32    16     
160    96     
-32    240    
16     -64    
-48    -96    
48     224    
-16    160    
0      48     
-48    64     
-160   -272   
-96    -64    
128    -176   
112    208    
64     240    
-192   -48    
272    208    
-272   160    
32     64     
-96    48     
-48    32     
-80    0      
48     128    
-192   -112   
0      64     
-48    240    
-96    416    
80     -80    
-128   0      
-64    176    
16     0      
-16    96     
-144   -48    
176    48     
336    464    
32     720    
-144   224    
272    384    
64     416    
32     208    
96     -16    
-192   144    
208    80     
-112   64     
144    32     
-320   -64    
304    80     
-96    144    
144    64     
-160   80     
144    80     
-144   64     
112    96     
-32    160    
-128   80     
400    240    
-80    320    
-64    32     
-64    -16    
128    64     
48     160    
144    64     
-80    48     
-48    -16    
-352   160    
304    -480   
-352   -352   
224    48     
-192   -32    
-32    160    
0      -160   
176    -112   
112    224    
-80    128    
240    -16    
16     400    
-16    80     
-32    -224   
64     16     
-176   48     
688    624    
-624   -208   
96     368    
16     -112   
176    -912   
-240   320    
208    448    
48     -64    
-48    0      
176    432    
-144   32     
80     48     
-64    -32    
256    432    
-304   160    
192    -80    
48     288    
-16    144    
32     16     
-32    -672   
208    -64    
-128   -48    
272    368    
16     160    
96     240    
32     368    
-128   192    
128    -80    
-16    112    
64     -96    
0      64     
0      -208   
-112   -304   
288    304    
16     64     
-208   320    
224    -176   
-96    144    
-48    64     
272    336    
-288   208    
16     160    
-208   -176   
304    80     
0      176    
112    176    
-224   48     
48     48     
144    160    
-16    0      
96     96     
80     -848   
-96    144    
-112   -304   
-80    -112   
-160   -544   
16     -288   
160    128    
-80    160    
-192   0      
-32    -48    
176    128    
112    32     
-192   48     
-272   -496   
352    -32    
-128   -320   
144    80     
-160   -128   
176    0      
-32    112    
48     80     
-32    112    
160    48     
-160   0      
64     -16    
80     96     
-16    -128   
64     176    
48     -208   
0      64     
-16    -224   
64     96     
64     -720   
-64    32     
32     240    
-16    16     
80     128    
176    64     
-112   32     
-16    -32    
176    128    
-32    -464   
-16    128    
32     -256   
-112   16     
144    -128   
-80    80     
80     -192   
16     112    
-16    -96    
-48    -32    
-16    160    
208    144    
-192   16     
-48    -944   
224    112    
0      -256   
16     16     
80     -96    
80     96     
112    -96    
-160   272    
32     0      
160    144    
-304   -160   
240    112    
-160   -48    
-64    -128   
336    -80    
-16    64     
48     -32    
-160   -16    
384    176    
-160   -256   
336    80     
-80    -80    
112    80     
160    -352   
208    -832   
-256   96     
-16    -1552  
240    16     
-368   -64    
16     -256   
160    -48    
-160   -800   
96     -80    
48     -656   
144    -96    
32     144    
80     -16    
0      80     
112    0      
-64    -144   
64     80     
32     0      
64     80     
-320   -96    
0      -288   
176    -16    
80     -64    
-128   -112   
112    320    
144    16     
-112   -32    
128    -96    
144    -400   
-128   -48    
112    -240   
80     160    
-32    -192   
144    0      
192    240    
-432   -16    
-400   -16    
64     16     
112    -48    
-16    -48    
128    -144   
-48    -288   
336    -32    
-32    -144   
112    176    
240    128    
-16    128    
128    -80    
0      -208   
32     -16    
80     -16    
-16    240    
144    0      
112    0      
-128   -128   
32     -144   
128    -192   
-32    32     
48     -560   
48     80     
-192   -112   
192    -80    
-160   -112   
64     -192   
-112   64     
64     0      
-16    0      
144    -32    
96     -128   
96     -192   
-64    -16    
-32    -208   
-32    -64    
272    -368   
16     160    
-112   -192   
-48    32     
-192   16     
208    48     
-112   32     
160    16     
-496   -48    
48     -80    
-976   -48    
432    368    
-192   320    
-80    -80    
112    112    
96     -272   
16     64     
-64    -144   
64     -16    
144    112    
48     -80    
96     96     
-48    -128   
-96    32     
96     -64    
-256   32     
64     32     
64     80     
-16    -336   
-48    64     
176    -624   
48     32     
240    -736   
-208   176    
560    320    
-480   160    
-272   -128   
16     -48    
320    80     
-192   -112   
128    224    
32     -64    
16     -160   
48     -368   
256    128    
32     -128   
0      96     
48     80     
160    64     
48     64     
-176   0      
-112   -112   
48     -224   
32     -128   
224    0      
16     32     
-80    -64    
48     64     
288    -32    
0      208    
-80    -80    
-32    96     
-272   -432   
-176   -320   
-112   -272   
-96    -64    
-48    -64    
0      -240   
-176   -160   
-32    304    
-64    432    
-128   -208   
16     96     
64     -96    
-48    16     
-528   -112   
-240   304    
176    272    
-512   -288   
48     -560   
-448   288    
-80    -352   
48     368    
80     -176   
16     224    
48     -192   
-176   -384   
0      112    
-400   -64    
48     -192   
-208   -176   
-112   240    
192    -144   
-160   80     
16     112    
-64    64     
-144   16     
-208   144    
16     -208   
-32    -384   
32     368    
16     -64    
-112   256    
32     -80    
-96    16     
-80    80     
144    48     
-96    80     
-144   -48    
-112   -16    
48     0      
32     80     
-464   32     
112    48     
-112   -32    
16     48     
112    -80    
-128   256    
112    -80    
-336   -112   
240    -32    
-160   64     
-112   -112   
-288   -224   
-32    32     
-80    112    
-80    144    
32     144    
-80    32     
-688   -80    
240    176    
-144   144    
64     128    
64     -240   
96     -112   
32     96     
0      16     
-32    48     
-16    112    
-96    -112   
96     -80    
-48    -80    
-64    -16    
-208   -48    
0      0      
-16    160    
-192   -176   
48     112    
-160   -176   
192    224    
-128   464    
48     64     
112    400    
16     112    
32     -144   
-48    32     
64     96     
-208   -128   
176    48     
-144   -48    
96     240    
-448   208    
32     64     
-48    48     
-16    32     
0      80     
48     48     
-64    64     
-176   0      
-176   -512   
112    -32    
16     448    
-96    208    
16     0      
-160   -112   
-80    160    
-224   -320   
-48    256    
-208   -368   
448    -672   
32     864    
224    -112   
-160   480    
-16    -144   
0      160    
-32    -128   
160    32     
-64    192    
0      -208   
-240   32     
64     336    
-112   -176   
-16    256    
144    48     
0      224    
-144   -176   
64     -128   
0      64     
80     48     
-32    -160   
-304   -464   
-32    -192   
-192   -96    
32     64     
80     320    
-112   288    
-128   80     
-32    32     
-48    48     
80     0      
-448   -432   
48     -224   
48     144    
32     16     
32     128    
160    112    
224    352    
-320   0      
112    176    
48     -144   
160    64     
128    160    
-96    96     
-16    -48    
192    240    
-128   176    
-32    0      
32     272    
256    96     
-624   -432   
560    48     
0      352    
-192   -128   
-48    96     
0      -144   
-48    144    
0      -16    
-80    176    
64     -48    
16     112    
128    32     
-32    96     
32     48     
-48    48     
176    96     
-192   -160   
80     32     
-32    0      
-64    112    
-48    64     
-224   -176   
240    48     
-192   112    
16     64     
48     48     
160    144    
-128   32     
-128   80     
304    128    
336    192    
-448   32     
176    64     
-256   -16    
192    224    
-336   64     
144    160    
0      160    
96     144    
-224   64     
0      64     
16     80     
48     96     
144    160    
-128   16     
144    48     
96     96     
32     96     
48     48     
176    112    
48     64     
32     256    
176    -16    
32     0      
160    160    
112    64     
48     192    
32     272    
-16    -64    
0      -32    
112    112    
-96    -48    
96     96     
48     16     
112    128    
-96    -96    
240    -1920  
48     -80    
128    -48    
32     0      
-32    80     
-96    -128   
-80    16     
96     144    
-16    -48    
-32    80     
-96    -288   
144    144    
-32    -112   
128    16     
-240   16     
-112   -240   
304    144    
-112   80     
112    80     
-80    176    
16     -128   
-32    96     
32     112    
48     -80    
192    240    
-96    80     
48     96     
0      16     
-96    -224   
80     80     
160    -64    
128    16     
-48    16     
416    288    
-224   80     
-96    144    
240    -32    
-32    64     
0      64     
48     96     
96     272    
80     112    
-80    48     
48     -48    
192    128    
-96    -112   
0      128    
112    -576   
-80    48     
96     96     
-96    96     
64     96     
32     96     
-16    -112   
-32    -16    
-80    -96    
0      -32    
-96    32     
96     -112   
48     -16    
16     -160   
32     32     
-112   -368   
464    -112   
-128   -672   
80     192    
112    16     
16     48     
176    96     
-96    48     
-80    0      
208    64     
112    176    
112    16     
0      16     
96     -16    
64     160    
16     -32    
144    32     
-96    -384   
144    64     
-128   48     
288    144    
32     176    
16     80     
-16    16     
48     -32    
112    32     
-32    -336   
176    32     
32     32     
64     -16    
192    -192   
64     128    
-80    -304   
144    16     
-64    112    
112    96     
-96    16     
80     352    
96     -64    
16     -320   
224    272    
48     -80    
-96    -224   
128    16     
528    448    
112    -128   
-160   144    
64     16     
-128   -144   
384    64     
-224   224    
272    -528   
32     -2608  
160    -1200  
112    128    
-16    80     
16     48     
368    208    
-128   -16    
32     64     
-48    -64    
288    224    
-224   -128   
16     128    
-32    -32    
64     -480   
-128   -32    
-112   64     
-80    -112   
48     -256   
48     -384   
112    -352   
416    -2768  
96     -48    
240    224    
-288   -192   
128    48     
128    -80    
144    96     
224    304    
-176   112    
-64    80     
-160   0      
128    0      
80     -240   
80     -272   
0      -96    
-176   -224   
112    112    
-272   -384   
-272   -368   
0      16     
80     -96    
-48    -432   
32     0      
-48    -32    
160    -320   
-64    -96    
-16    -304   
-560   -256   
16     -144   
176    -16    
32     -128   
208    160    
-96    -1296  
144    -336   
80     288    
-336   -48    
144    144    
0      64     
-112   -80    
64     -48    
-448   -128   
80     -112   
-656   0      
160    32     
64     96     
-16    -240   
0      -64    
144    144    
-160   -576   
448    -464   
-32    752    
-32    -144   
-32    -320   
-128   -128   
160    96     
16     208    
160    240    
-48    528    
112    224    
-32    144    
208    -288   
-256   -272   
224    -48    
-16    -64    
144    16     
160    320    
-16    0      
576    352    
-416   640    
288    -48    
48     128    
160    272    
-192   -112   
-272   -144   
160    80     
-16    -16    
-32    48     
-80    -48    
240    128    
16     -208   
0      112    
48     -32    
64     32     
224    112    
-96    400    
-144   160    
32     -192   
-592   -352   
160    32     
-240   192    
80     -32    
-208   112    
-64    -336   
-80    80     
80     -592   
-80    -320   
112    -80    
-48    64     
32     -400   
0      -128   
-208   0      
48     0      
-96    256    
16     144    
-48    -32    
32     -80    
16     -96    
-48    -160   
96     96     
-32    -160   
-48    -32    
-64    144    
64     -176   
-736   -384   
64     -784   
176    -16    
96     224    
80     608    
-224   -256   
176    -992   
80     368    
208    512    
-96    -240   
112    128    
128    -96    
-1168  -80    
-240   -192   
-608   -48    
-240   32     
0      128    
48     -96    
-96    -208   
0      32     
-32    -304   
-176   -48    
0      0      
192    16     
-464   -448   
176    0      
-336   -160   
64     112    
-112   -128   
144    -64    
-160   96     
64     -80    
-336   -352   
96     -304   
-80    -96    
-32    -272   
-32    304    
112    144    
64     176    
-528   16     
-80    32     
-96    96     
-80    -64    
-32    112    
-96    -96    
-144   304    
-16    -16    
-208   -48    
-368   -96    
32     80     
128    176    
-48    16     
-64    -80    
416    400    
-448   224    
192    -80    
-288   -112   
224    64     
144    128    
-400   -96    
16     -16    
-448   32     
48     96     
-352   -80    
-496   -816   
-1376  -576   
208    112    
-112   -240   
-32    -16    
160    48     
80     208    
64     96     
-128   -80    
144    -80    
-256   -80    
-32    16     
48     112    
-240   16     
64     96     
-176   -16    
-496   48     
48     208    
-176   48     
48     -160   
400    -192   
144    -96    
-96    -96    
-48    80     
-64    -32    
-80    -192   
80     224    
64     16     
-96    -32    
-384   -144   
0      -64    
-304   -160   
-112   48     
80     -160   
160    0      
144    48     
-144   32     
-48    80     
-176   -80    
192    128    
16     96     
96     16     
-224   80     
48     32     
-192   0      
48     240    
-336   -128   
80     112    
0      0      
-96    48     
144    -16    
-96    48     
160    96     
-32    16     
-80    -80    
-96    64     
16     64     
96     208    
-272   128    
-112   80     
-112   80     
-144   32     
208    160    
-480   -112   
176    64     
-208   112    
-64    16     
-16    80     
48     32     
-80    64     
-16    48     
-48    16     
-96    64     
128    80     
-224   32     
224    192    
-448   -48    
80     192    
-16    272    
-352   -16    
80     16     
48     48     
96     48     
32     16     
32     80     
96     160    
-304   -32    
176    160    
64     -16    
-464   -144   
304    -144   
-256   48     
352    48     
-176   112    
64     96     
64     48     
0      64     
-48    64     
112    128    
-160   32     
-16    48     
-16    16     
16     80     
0      64     
-80    80     
208    144    
-160   48     
48     80     
80     112    
0      32     
112    -80    
-80    128    
96     32     
32     80     
0      -64    
48     -48    
-128   -96    
-32    -16    
352    480    
-528   48     
80     144    
-16    32     
112    48     
-64    48     
-16    64     
112    0      
-48    160    
160    192    
-208   208    
64     96     
32     80     
-96    48     
128    80     
-96    160    
-128   -32    
112    160    
-80    -16    
-80    192    
144    144    
16     64     
96     64     
-64    128    
48     0      
-32    48     
32     144    
144    192    
32     96     
-64    32     
0      32     
-48    64     
144    144    
-32    80     
96     48     
-32    32     
-96    256    
128    160    
208    160    
-224   96     
-16    64     
0      96     
128    224    
176    64     
-304   0      
192    272    
112    32     
-112   -368   
32     -16    
112    352    
-240   -80    
176    0      
-144   16     
-96    0      
16     32     
32     112    
160    128    
-128   80     
96     208    
-80    -32    
144    0      
-80    -112   
112    -112   
32     112    
48     176    
112    352    
176    192    
-176   -64    
256    128    
112    432    
-128   448    
352    704    
-320   624    
240    464    
-176   80     
-32    16     
32     -48    
32     16     
-64    -16    
224    -240   
80     128    
-96    -160   
48     -48    
-48    -16    
96     80     
16     -64    
-16    128    
64     288    
224    176    
16     128    
128    512    
32     480    
80     -464   
-32    16     
80     64     
32     112    
-64    160    
240    208    
-48    80     
-144   48     
112    -32    
-16    -128   
208    128    
-48    144    
96     96     
-48    224    
-176   -176   
528    -400   
-288   96     
192    -352   
32     320    
96     -896   
-16    -96    
176    112    
-32    160    
-64    -112   
-64    112    
48     256    
64     -128   
-352   -80    
0      -224   
128    80     
304    368    
-384   -48    
208    -176   
240    592    
-176   -656   
-96    -16    
-32    -576   
288    -48    
32     288    
-176   256    
176    -544   
160    384    
-144   48     
64     -176   
64     256    
80     -288   
16     -112   
-224   -848   
288    112    
-144   -48    
128    64     
48     -528   
80     320    
-112   240    
32     -64    
128    -272   
-208   -80    
384    176    
-80    -784   
64     96     
192    0      
-48    288    
32     -352   
112    -144   
144    352    
128    336    
48     672    
-16    304    
-64    -432   
112    -160   
16     64     
224    192    
-48    80     
0      -320   
-32    -320   
112    -48    
112    128    
320    240    
-496   -256   
64     -816   
128    112    
16     -192   
-48    32     
16     -16    
192    -768   
-32    48     
-112   -320   
48     -208   
112    0      
48     -704   
64     -32    
48     32     
32     -128   
-112   0      
96     -240   
64     -48    
32     -48    
48     -384   
-272   -48    
304    -1088  
-80    656    
-848   288    
-272   -544   
208    -96    
48     48     
-32    -256   
240    0      
224    80     
-208   224    
112    -256   
208    320    
-32    48     
176    -416   
-48    224    
224    -112   
-48    -224   
32     -208   
128    128    
96     -240   
160    -80    
64     -80    
64     -384   
112    -16    
96     -64    
-64    224    
208    -640   
32     176    
112    128    
176    288    
-112   -272   
112    -288   
-304   272    
96     -368   
-800   -160   
48     -272   
224    16     
-96    -176   
-336   -608   
208    -416   
128    64     
48     -32    
96     64     
16     208    
160    128    
-304   -208   
192    -720   
-256   -336   
160    -112   
-1056  32     
224    32     
32     16     
224    192    
16     -48    
64     -96    
128    16     
-176   -560   
304    -80    
-128   48     
240    144    
-112   -16    
144    -112   
64     48     
192    48     
-240   176    
96     32     
-736   -128   
128    -320   
-112   -112   
0      -176   
160    64     
-160   -560   
192    64     
-48    16     
64     -416   
-240   -256   
176    192    
-224   -240   
400    -48    
-608   -16    
336    -112   
-672   -96    
176    -112   
-32    -96    
176    32     
0      -48    
320    -704   
80     16     
-64    -64    
368    16     
-64    -16    
240    64     
16     64     
32     -16    
-448   -48    
192    96     
-80    -112   
240    -176   
288    80     
160    -176   
176    240    
-96    80     
96     160    
-256   48     
208    256    
64     48     
-288   112    
176    160    
48     0      
48     80     
96     -112   
-64    -64    
144    -160   
112    -176   
160    -160   
128    192    
128    -144   
208    -128   
176    128    
48     -176   
-224   128    
48     0      
-192   128    
144    64     
-160   64     
144    144    
-112   48     
64     -304   
-352   192    
-192   -176   
256    112    
-320   -144   
-832   -48    
-400   -48    
-128   -48    
48     48     
48     80     
-176   48     
-48    96     
-160   -64    
-48    -48    
-160   -48    
-1328  -64    
32     128    
-336   -16    
-192   192    
-32    -176   
-432   144    
-80    -128   
-112   48     
48     32     
-64    0      
-48    80     
144    112    
-368   80     
80     -80    
-96    -64    
-208   -96    
256    304    
-352   -160   
-80    80     
160    0      
-80    48     
16     -224   
-544   0      
320    144    
-464   -80    
-48    16     
-1456  -80    
-112   64     
240    16     
-128   32     
-48    -32    
112    208    
-80    -112   
32     144    
208    160    
-256   64     
48     112    
112    80     
16     32     
-96    80     
-16    32     
-256   -32    
-64    -48    
-384   -80    
32     96     
-176   80     
32     192    
-112   -96    
80     144    
192    224    
-416   192    
176    256    
-272   48     
80     64     
-208   16     
16     48     
80     16     
-96    80     
-816   -176   
-64    64     
352    224    
-240   224    
-176   -80    
112    -16    
-224   -96    
-64    32     
-80    0      
-48    112    
-80    16     
32     -48    
48     64     
-224   112    
-176   32     
-160   32     
144    16     
0      32     
96     0      
208    80     
-432   96     
-64    288    
160    96     
-80    0      
48     96     
-48    -80    
-144   -128   
16     -304   
-304   -224   
16     -48    
112    160    
0      48     
112    0      
-64    32     
-32    80     
-64    80     
352    224    
-112   576    
64     -160   
-176   -240   
80     32     
-16    144    
-128   144    
-144   16     
96     -288   
-144   48     
96     128    
-608   304    
-512   256    
240    -256   
-16    544    
-192   -592   
128    -112   
256    464    
-112   48     
288    848    
-240   -64    
80     80     
-80    -144   
144    192    
-192   -144   
352    464    
-448   -80    
160    -224   
-48    256    
80     384    
-32    -320   
32     -192   
16     176    
-48    -64    
-32    176    
64     -64    
-128   368    
-96    -112   
-128   0      
-96    304    
-208   -128   
32     480    
-48    -96    
-48    32     
64     128    
-32    0      
32     96     
192    256    
-656   -240   
176    -304   
64     48     
144    368    
-128   -80    
144    224    
-112   16     
64     608    
112    -400   
208    -240   
64     496    
0      -144   
-224   -320   
-112   -656   
16     320    
96     656    
-64    144    
-96    -304   
272    -16    
-176   176    
48     -64    
64     -80    
-144   224    
64     224    
-32    352    
-208   -176   
64     -48    
-288   -224   
64     -64    
272    592    
16     272    
-208   -208   
-208   -736   
240    432    
-32    -32    
96     112    
-48    -16    
112    -304   
-272   384    
432    -96    
112    624    
-320   -416   
176    16     
64     320    
-144   -192   
0      352    
192    464    
-144   160    
-96    64     
-240   -160   
192    48     
-272   -240   
256    576    
64     48     
-160   176    
-16    48     
-64    -32    
-16    32     
-112   0      
32     -80    
0      -48    
32     176    
-96    -48    
-80    64     
-80    -224   
16     16     
-16    400    
256    -48    
16     656    
-320   -304   
-256   -1216  
176    -80    
240    928    
-256   -448   
416    384    
-272   -32    
256    0      
336    304    
-432   -608   
432    480    
-48    400    
80     -160   
-16    -688   
176    -256   
64     272    
-112   80     
256    64     
-240   -96    
320    224    
-48    432    
16     -16    
-48    368    
16     -352   
128    304    
80     112    
48     -384   
-32    416    
128    -1104  
240    112    
16     48     
32     48     
48     80     
80     80     
-48    64     
80     64     
-32    -48    
-80    -528   
112    32     
-112   160    
256    560    
-224   -384   
-112   -336   
432    368    
192    560    
-80    -672   
112    384    
-32    -256   
176    0      
-32    336    
160    416    
-16    -128   
-48    112    
128    144    
-96    -48    
96     48     
48     16     
0      240    
80     272    
64     208    
-64    -1376  
112    -32    
128    -288   
16     -64    
-128   -64    
160    -64    
-112   144    
96     192    
-64    80     
-160   -96    
272    176    
-64    -240   
128    -48    
96     -336   
-80    64     
-80    -496   
112    64     
-64    -304   
-64    32     
16     32     
64     128    
-112   -48    
288    64     
-32    112    
64     -16    
192    80     
-96    -288   
48     80     
-112   -448   
512    -256   
-64    -64    
496    480    
-384   -112   
176    48     
48     0      
-48    144    
80     48     
-16    0      
160    -16    
32     -304   
128    16     
16     48     
80     96     
112    -64    
176    128    
-64    -16    
32     112    
-48    -256   
-16    0      
160    64     
-16    -32    
0      48     
144    -80    
-192   64     
432    -288   
-16    96     
128    -64    
272    144    
-304   0      
208    -80    
-224   -144   
192    48     
48     48     
80     192    
160    112    
48     -832   
128    208    
-432   64     
16     -320   
-160   -192   
160    -688   
-208   -608   
352    -544   
-32    -400   
336    -128   
-128   -384   
208    -208   
0      -64    
-16    -48    
448    224    
224    288    
176    -512   
-1200  -144   
528    -112   
288    224    
176    -512   
16     -32    
128    -880   
-64    -352   
-96    -128   
112    256    
192    144    
-80    208    
160    -160   
-112   32     
112    -96    
-16    -96    
-48    -32    
144    16     
160    -48    
48     16     
-144   -192   
112    -320   
112    0      
48     -336   
-64    -48    
48     -96    
-160   -32    
-16    -112   
144    80     
-112   64     
32     80     
-464   -16    
-144   0      
64     -64    
-32    -32    
48     -48    
64     -176   
112    128    
272    -272   
96     32     
176    -128   
-192   64     
144    0      
80     112    
-64    64     
368    96     
-384   128    
16     -80    
112    16     
-144   -336   
272    -16    
16     -32    
-192   -80    
32     -624   
-32    -112   
160    -96    
112    144    
160    208    
-32    -32    
-144   0      
64     -32    
-208   -80    
32     -16    
48     -16    
-128   -48    
-576   -128   
64     -272   
64     0      
176    -336   
64     112    
-48    -384   
-16    0      
48     -96    
80     -16    
-144   -32    
112    0      
-160   0      
64     -16    
96     16     
-48    -16    
-624   -48    
80     0      
-32    -80    
112    -48    
160    48     
-144   -256   
144    48     
-144   -160   
224    -16    
-272   0      
176    64     
64     0      
192    -16    
-576   128    
320    0      
-256   -64    
64     -112   
64     -112   
-208   -496   
32     -48    
256    -336   
-80    352    
-48    176    
48     96     
-144   -16    
128    -240   
-128   192    
0      160    
-16    128    
128    96     
-160   -32    
160    -64    
48     48     
144    -32    
-144   -32    
112    -432   
80     272    
64     176    
256    -128   
-256   32     
-32    -48    
-128   -560   
112    400    
-320   -784   
-48    16     
-144   -336   
224    0      
192    784    
-176   -384   
112    -112   
-160   -96    
-144   80     
48     -96    
-1216  16     
176    64     
112    32     
96     176    
112    -48    
-96    -32    
80     -384   
-16    48     
-784   32     
80     32     
-96    -32    
80     96     
32     80     
-224   -32    
-176   -256   
-80    -384   
-160   80     
240    48     
-48    64     
480    0      
-96    48     
64     32     
192    352    
-256   -32    
240    112    
-144   -192   
80     304    
-16    16     
16     80     
32     48     
0      64     
-80    384    
272    368    
-144   48     
-256   336    
-352   272    
-32    16     
96     416    
-48    -48    
0      16     
-48    0      
-80    48     
-112   64     
-16    -128   
240    -128   
-288   48     
192    160    
-192   64     
-96    160    
-32    128    
128    128    
96     160    
-160   288    
-128   -368   
176    144    
0      624    
144    176    
-288   -112   
-208   16     
240    -352   
-320   -112   
-192   144    
368    272    
-96    320    
-112   -432   
-64    -288   
-288   -96    
0      16     
16     352    
224    336    
-48    224    
-48    -256   
0      400    
-112   480    
-16    -16    
-224   128    
64     32     
-224   256    
-64    -48    
-160   -80    
-96    -80    
-256   -128   
64     272    
-80    -208   
128    -304   
-96    -448   
112    768    
-80    352    
-112   -240   
-96    224    
224    176    
-304   208    
112    -32    
-320   -112   
800    512    
-640   832    
-240   -1184  
96     -96    
160    416    
-192   -176   
0      -496   
-80    128    
16     80     
16     64     
-32    -352   
-208   -112   
192    -128   
-80    496    
96     304    
-288   -624   
80     160    
48     656    
-208   416    
-432   -528   
-32    0      
0      160    
48     272    
0      96     
-80    -96    
-32    -352   
64     0      
288    -16    
-176   -432   
144    128    
160    144    
-272   -640   
-48    -400   
256    352    
192    288    
0      192    
112    0      
128    -304   
192    -32    
80     96     
112    48     
64     -32    
224    336    
-256   -144   
272    80     
-256   -160   
224    128    
-352   -176   
0      -320   
272    160    
-208   -144   
256    -96    
-224   64     
48     32     
32     112    
208    48     
-64    -16    
-48    144    
-96    -128   
0      -336   
-64    96     
368    192    
-224   16     
64     -112   
64     -80    
272    208    
-256   -128   
128    144    
-80    48     
-16    160    
208    64     
-144   80     
224    80     
-96    32     
256    112    
-208   32     
288    336    
-112   256    
0      160    
144    48     
-16    32     
-64    80     
176    80     
-16    112    
64     32     
-32    112    
64     32     
144    336    
-256   -48    
-16    160    
272    -16    
-32    112    
-128   160    
-32    48     
80     48     
32     0      
0      144    
-32    32     
272    160    
-128   144    
96     64     
-144   0      
208    112    
-224   16     
48     128    
-160   -64    
48     -1216  
-64    64     
112    224    
0      -48    
112    -16    
128    32     
-80    96     
16     64     
-16    16     
32     16     
96     128    
-48    128    
32     -96    
-32    -96    
-240   -64    
144    -176   
-32    -16    
176    32     
-112   64     
160    192    
-32    208    
-160   128    
-160   0      
144    144    
80     112    
240    320    
-160   208    
-80    48     
112    48     
-160   0      
192    0      
48     -176   
0      -1296  
176    -48    
0      176    
208    80     
64     128    
128    48     
80     32     
112    80     
-352   -256   
144    -32    
0      96     
272    224    
-96    80     
160    -208   
-16    64     
176    -816   
48     48     
80     -32    
176    128    
-208   96     
320    336    
-160   -16    
352    32     
-288   80     
112    32     
-144   -32    
144    128    
-48    160    
144    -192   
48     80     
208    -48    
-128   16     
320    96     
48     80     
-64    48     
144    32     
-112   0      
128    112    
-80    256    
240    128    
-64    128    
-80    -64    
160    80     
-192   -64    
224    112    
-96    -48    
32     0      
144    -1584  
-16    160    
80     -256   
-224   80     
48     16     
208    48     
-96    112    
176    112    
16     64     
80     -160   
-16    64     
0      -112   
96     48     
96     -176   
128    160    
240    -48    
-320   176    
112    80     
144    96     
128    48     
-48    64     
64     -144   
128    144    
224    96     
32     -112   
-16    96     
32     224    
80     96     
-32    -368   
112    48     
48     -48    
-32    64     
80     80     
112    240    
-272   16     
48     16     
112    128    
80     32     
-16    80     
112    -208   
-32    96     
112    -128   
240    48     
-32    -144   
96     128    
112    0      
-64    -160   
240    -1088  
0      272    
-48    112    
-80    -32    
240    96     
192    64     
-32    224    
80     -32    
96     96     
112    -128   
96     128    
128    -32    
-48    32     
240    0      
48     -16    
-240   -736   
96     -2352  
0      -416   
96     384    
112    -464   
64     -32    
16     -240   
16     -448   
144    -192   
48     32     
48     112    
64     -16    
16     144    
48     -80    
48     -304   
80     64     
96     -64    
112    208    
48     800    
-16    -656   
-240   272    
-352   -32    
160    -368   
32     -224   
112    -160   
80     -720   
80     -48    
224    208    
-112   -96    
320    -208   
-112   192    
240    -208   
80     432    
-128   80     
-64    -224   
-192   0      
80     336    
-64    0      
0      -320   
0      -112   
144    0      
-32    256    
-16    16     
112    -400   
64     64     
16     48     
128    -112   
-16    272    
-96    112    
256    176    
-416   -272   
128    -384   
-928   -432   
48     -528   
64     -96    
16     144    
160    48     
0      -192   
-96    32     
-16    -64    
48     16     
32     224    
112    -176   
-144   0      
32     -64    
-400   -80    
0      32     
-816   -32    
64     0      
48     -48    
176    464    
400    80     
-224   -800   
128    32     
-144   32     
144    144    
-64    16     
-80    -304   
32     -128   
64     80     
-240   96     
544    320    
-272   336    
176    16     
272    32     
96     -240   
-208   -96    
-144   -464   
-48    -16    
128    -304   
-64    16     
-32    176    
32     -144   
-192   -176   
-144   32     
192    -144   
-80    0      
-224   -176   
288    48     
-384   80     
224    32     
0      464    
-48    -400   
192    48     
16     -288   
80     -16    
-208   32     
128    0      
64     -32    
-176   -400   
-240   -160   
400    -240   
-496   128    
304    -48    
-80    32     
64     -64    
112    256    
208    -240   
-96    -272   
0      -160   
128    544    
-48    -336   
144    352    
-160   192    
48     -224   
0      -16    
-112   -80    
640    672    
-512   -384   
0      -320   
-48    -144   
144    -32    
48     -336   
-400   -544   
384    -320   
288    240    
-208   96     
224    -32    
-416   -544   
-192   -832   
-16    -336   
-176   -112   
96     -32    
-96    112    
288    144    
-1056  0      
-128   -80    
-528   -224   
128    -32    
48     48     
176    352    
112    336    
-752   240    
-128   128    
-80    -96    
-128   -64    
256    224    
224    128    
-192   -192   
-144   -32    
-624   -160   
-32    112    
-80    176    
144    208    
-176   16     
-144   112    
48     64     
96     -48    
-240   -16    
-128   -288   
-48    -224   
-48    -96    
-48    192    
64     -16    
-160   0      
32     176    
-128   208    
0      192    
96     48     
-192   208    
96     352    
224    128    
-112   -80    
96     160    
-160   16     
-48    16     
-368   -32    
-176   -96    
-304   -64    
144    96     
272    128    
48     112    
-160   -112   
32     16     
-32    128    
96     64     
-208   32     
16     80     
-32    64     
-400   -64    
-128   16     
-400   160    
176    32     
-304   -112   
128    112    
-64    -160   
-48    64     
304    288    
-352   160    
96     96     
16     -320   
-112   -48    
-16    -64    
-144   48     
96     112    
-48    32     
32     208    
48     96     
-448   0      
-208   16     
16     -128   
128    128    
32     96     
0      -32    
80     -208   
16     -144   
-16    -32    
0      -32    
-32    80     
-16    96     
160    224    
-464   0      
48     80     
-368   -80    
32     32     
16     0      
-48    16     
0      -96    
-48    64     
176    48     
-224   16     
16     112    
-64    16     
-32    48     
-16    0      
16     112    
0      64     
-64    -48    
32     -160   
128    144    
-832   64     
112    128    
-288   48     
176    48     
-96    112    
80     160    
32     64     
96     144    
-128   80     
400    304    
-464   160    
32     96     
16     0      
-48    0      
128    16     
0      240    
128    96     
-160   -48    
32     -32    
64     16     
208    144    
-160   32     
16     144    
64     0      
32     80     
-48    112    
-128   -32    
32     -16    
-32    -96    
0      48     
64     -32    
-16    96     
80     128    
-144   0      
64     160    
-112   64     
-16    -16    
-16    112    
0      80     
64     16     
0      144    
-48    -16    
48     160    
-128   -48    
-96    48     
336    352    
-224   416    
-144   32     
-16    -16    
96     48     
-96    -144   
-16    112    
16     80     
-16    48     
-80    32     
112    80     
-192   48     
144    240    
-224   -32    
-48    64     
224    32     
-112   80     
96     128    
-32    0      
-48    -80    
288    16     
32     208    
48     64     
160    96     
-96    128    
-48    -48    
-96    112    
112    80     
16     0      
32     96     
160    160    
-160   32     
32     16     
192    -48    
-32    32     
112    112    
-48    16     
64     64     
-16    48     
-192   -96    
208    64     
-48    80     
192    128    
32     32     
320    272    
-368   48     
80     112    
32     112    
256    64     
0      128    
112    -80    
-64    176    
208    256    
-240   256    
-32    128    
128    64     
-240   -128   
288    -128   
144    208    
224    32     
-304   160    
320    -48    
-32    96     
16     -32    
-16    48     
64     16     
160    96     
-48    80     
224    192    
-64    224    
-16    112    
-224   -32    
48     -800   
48     96     
16     112    
-64    -48    
96     112    
32     80     
48     48     
80     -16    
240    144    
-32    128    
-32    128    
64     80     
-32    -144   
384    512    
-288   -32    
64     -1088  
-16    384    
176    800    
-96    -336   
160    416    
112    144    
-128   192    
112    -144   
-16    256    
128    -16    
-96    80     
144    96     
-32    64     
288    144    
-192   64     
288    64     
-224   -96    
-48    -2064  
224    352    
144    416    
-176   -208   
64     112    
352    80     
-384   160    
192    64     
-16    80     
64     80     
48     96     
48     -80    
32     48     
48     -256   
32     112    
256    -352   
-96    240    
-80    -1664  
64     -64    
-112   -608   
160    160    
-16    -128   
64     64     
32     32     
32     128    
272    464    
-128   -96    
16     -176   
128    48     
128    -80    
32     -336   
96     48     
32     -928   
-16    144    
-48    -1920  
112    112    
-48    96     
80     128    
-16    -48    
64     208    
-48    144    
96     -16    
80     128    
112    -16    
112    160    
-80    -384   
128    -16    
-32    -768   
80     -256   
-336   -224   
432    -160   
-288   -464   
208    -176   
-16    192    
80     80     
96     64     
48     192    
128    64     
-80    -448   
64     -256   
32     -368   
112    96     
160    -80    
-16    176    
96     64     
-48    80     
80     48     
112    192    
-176   16     
64     -128   
16     256    
176    -64    
-80    96     
288    -80    
-80    176    
0      -176   
112    96     
64     -48    
-304   -288   
576    400    
16     704    
-16    -96    
128    -128   
48     -16    
176    544    
272    -848   
-256   -192   
0      -144   
-224   400    
256    352    
-336   -416   
192    176    
-192   -320   
160    -528   
-224   16     
320    -128   
-32    -240   
-64    -128   
224    -240   
160    -64    
240    224    
144    -384   
-64    -752   
208    112    
96     -128   
-16    -448   
96     128    
288    352    
336    -80    
-48    64     
112    -288   
112    80     
-16    -352   
16     -48    
-144   48     
-48    -192   
0      -16    
144    -112   
64     512    
224    -304   
-32    32     
0      144    
-80    -64    
272    -16    
-144   32     
352    80     
-336   32     
16     0      
64     -16    
-272   -176   
224    -208   
64     96     
208    -176   
192    32     
-160   96     
160    -16    
16     -1104  
16     0      
352    176    
-352   -96    
272    -96    
160    -176   
-48    32     
64     -128   
-208   -80    
288    -160   
0      48     
80     -208   
448    288    
-272   224    
48     32     
-80    -192   
128    16     
-48    -80    
-256   -96    
176    -80    
64     64     
-144   80     
80     96     
-384   -96    
-64    -48    
-1008  -16    
-48    112    
256    96     
-48    16     
-192   32     
112    -400   
96     192    
-160   -288   
112    -48    
48     80     
144    -16    
-32    -48    
320    48     
-288   96     
-128   -592   
-192   -112   
176    96     
176    208    
-256   -208   
-48    -48    
128    -448   
208    144    
-112   -528   
16     0      
-96    -96    
-80    144    
-64    -80    
0      -32    
-528   0      
144    16     
-80    32     
-16    -80    
-80    -64    
96     -192   
-128   -80    
128    -224   
-48    0      
-48    -672   
272    -48    
-240   144    
192    -64    
-176   -32    
128    -16    
16     96     
32     -16    
-320   -176   
336    -224   
-368   32     
336    -64    
-64    64     
176    -112   
-16    16     
-48    -176   
288    -32    
64     48     
112    0      
0      0      
0      48     
112    -192   
-128   16     
0      96     
-80    -16    
16     0      
224    -64    
0      192    
-688   -144   
272    336    
-320   80     
304    80     
0      32     
112    32     
-112   0      
32     -32    
-176   -272   
128    -128   
0      48     
-128   -176   
80     176    
-608   -288   
-64    160    
-32    -112   
-112   160    
-32    48     
-160   208    
224    16     
-512   48     
-16    -320   
-304   -176   
16     128    
240    112    
-112   0      
-624   -64    
-48    80     
-176   -64    
160    304    
-160   -112   
48     -64    
-272   32     
192    16     
-208   16     
-64    -16    
-48    0      
-176   16     
112    128    
-1456  -80    
112    -16    
-416   -48    
64     -80    
-48    0      
-16    48     
-64    -144   
-128   -96    
-48    0      
0      128    
-96    80     
0      -144   
-96    -160   
-176   160    
32     80     
-704   -112   
-32    -32    
-64    -16    
64     48     
16     -48    
-16    32     
48     -128   
-64    16     
48     -64    
-112   80     
80     32     
-64    32     
112    48     
-208   0      
-64    -32    
-144   48     
48     64     
-352   0      
64     64     
-144   -128   
128    128    
-96    96     
0      -16    
64     160    
32     16     
112    144    
-80    -16    
64     32     
-160   16     
-176   112    
352    112    
-32    112    
-608   0      
-160   -48    
80     -128   
0      -160   
128    128    
0      48     
-112   -48    
128    16     
-112   640    
112    192    
-128   -48    
48     -112   
-48    0      
64     -48    
160    176    
-416   64     
0      -48    
48     -112   
192    112    
-96    16     
-256   -32    
208    -16    
-32    -80    
160    48     
-112   32     
288    176    
-272   288    
128    128    
-464   96     
0      144    
-80    32     
192    256    
128    208    
80     192    
-176   112    
-192   -32    
-64    -160   
-192   -272   
96     0      
16     16     
32     224    
-288   96     
0      112    
64     -32    
128    64     
-96    -32    
128    80     
-32    16     
64     80     
-112   32     
-32    32     
192    336    
-144   400    
-144   -256   
-160   672    
160    208    
-336   -80    
112    96     
-192   48     
304    448    
-512   -32    
112    160    
-192   320    
192    -96    
-320   -128   
128    112    
-112   144    
48     -304   
-16    80     
-16    144    
-80    -144   
288    128    
32     480    
48     -48    
256    80     
-192   144    
64     0      
32     -112   
16     80     
-144   -144   
240    -272   
-16    160    
144    64     
-112   -208   
-96    -352   
304    -256   
-192   160    
64     -144   
80     -16    
-32    144    
-160   -48    
112    96     
16     80     
32     16     
-208   80     
160    80     
-48    16     
16     64     
32     80     
0      64     
432    272    
-320   272    
32     320    
-160   208    
352    224    
-112   64     
320    -32    
-96    -144   
64     16     
0      208    
-160   96     
192    64     
48     48     
144    112    
-464   -336   
320    -240   
32     224    
80     192    
-32    112    
32     -16    
32     96     
32     48     
-128   16     
112    -128   
-48    48     
112    320    
16     144    
0      64     
32     16     
-32    128    
32     80     
-160   -192   
32     -384   
-112   -208   
384    -304   
64     336    
-128   144    
-16    -80    
96     -16    
-80    64     
-16    16     
64     64     
80     64     
-224   -256   
-48    -192   
160    112    
-112   16     
48     144    
-32    96     
192    -1104  
16     96     
64     96     
176    272    
-176   -544   
32     -240   
192    1392   
160    400    
-240   -592   
192    544    
-64    -80    
16     -112   
16     320    
32     -176   
144    -640   
-64    64     
224    112    
0      -576   
144    192    
-128   336    
64     48     
48     64     
-32    128    
80     144    
160    64     
0      176    
160    64     
-176   -304   
112    -336   
-32    -304   
-64    -464   
80     -128   
-16    -1200  
208    304    
-128   48     
336    336    
-192   288    
-64    16     
64     -256   
112    240    
-112   -64    
-176   48     
144    16     
-192   -80    
800    320    
-208   64     
16     144    
32     -720   
144    32     
96     -1856  
-192   144    
96     32     
-128   128    
-96    -160   
80     -224   
-144   256    
320    224    
-224   96     
192    -48    
48     80     
80     -144   
240    240    
16     -80    
-96    256    
-32    -832   
0      64     
128    80     
80     112    
-112   -32    
272    96     
-96    48     
192    144    
64     0      
144    32     
-128   -48    
64     -160   
32     176    
-48    -192   
0      32     
32     -240   
256    224    
-48    384    
-144   80     
48     16     
0      16     
400    0      
-64    80     
64     80     
96     -32    
96     96     
0      -336   
208    64     
304    -112   
0      48     
-16    -32    
64     80     
128    48     
96     144    
0      48     
96     112    
16     32     
96     -160   
-112   96     
144    -16    
16     144    
128    -96    
-96    32     
128    -112   
-32    48     
240    32     
256    32     
-160   -160   
160    -992   
-144   -32    
96     -784   
112    -1776  
-64    48     
-48    -1392  
112    -176   
-48    -1712  
160    -160   
224    208    
-80    -48    
48     80     
64     -16    
80     -784   
-160   48     
144    -576   
-112   80     
208    -176   
16     -192   
256    48     
-48    -32    
336    96     
-256   -688   
160    -112   
-16    -160   
96     -64    
0      64     
-32    -128   
0      -368   
160    80     
64     -256   
16     -128   
-320   -32    
464    -208   
-128   -48    
64     -464   
112    160    
-208   -96    
80     224    
368    -512   
-192   -64    
176    -128   
112    0      
64     -128   
48     96     
16     -128   
48     16     
-416   -224   
240    -160   
-352   -96    
16     -112   
16     -160   
80     -80    
80     -224   
-16    -144   
128    -192   
-80    -1168  
240    208    
-160   -48    
32     112    
224    -240   
80     -16    
-128   48     
144    -32    
-64    16     
-16    -32    
-976   -80    
144    0      
-96    -160   
32     -272   
80     128    
272    -48    
-80    112    
48     -144   
80     48     
48     -32    
304    112    
-288   128    
240    -16    
-304   16     
64     -144   
-160   -112   
144    -80    
-128   -32    
-96    -80    
320    -48    
128    -880   
-64    128    
96     -480   
-192   16     
304    48     
80     16     
-160   -80    
144    -96    
-96    0      
0      48     
-336   -32    
-144   -224   
-224   16     
128    0      
-112   -144   
-64    -608   
176    0      
208    -1136  
-80    144    
-64    32     
80     16     
-112   -32    
32     -80    
64     0      
-64    32     
96     48     
-128   -80    
0      0      
144    -368   
272    -112   
48     96     
80     256    
192    -32    
96     48     
-32    -256   
-32    -288   
96     144    
16     -16    
-144   128    
-16    -96    
-176   32     
224    -64    
-288   48     
16     -96    
112    96     
-80    -352   
336    544    
16     -592   
64     -272   
-160   -96    
304    224    
64     224    
-32    32     
128    304    
80     0      
-336   -96    
-64    -224   
288    0      
48     -112   
48     -96    
112    -224   
-32    112    
48     -192   
-320   -384   
-32    -160   
-304   64     
-16    112    
48     -16    
-208   -64    
64     160    
208    176    
32     192    
64     208    
-320   -16    
48     -144   
-448   -80    
176    0      
-128   -32    
64     -32    
-16    -48    
-784   48     
-368   64     
-432   -816   
208    160    
80     448    
-80    -368   
-32    -304   
112    192    
-240   -160   
16     96     
-48    -128   
-272   32     
0      160    
96     -368   
-64    128    
-208   144    
16     16     
-288   128    
-112   -432   
-416   32     
-160   240    
-96    -160   
176    16     
80     -64    
-208   48     
80     -96    
-32    32     
-160   0      
96     16     
-32    80     
-48    128    
-144   -32    
-16    144    
-320   -464   
-192   -144   
128    496    
-128   128    
64     208    
-16    96     
16     16     
-16    128    
-464   -592   
96     -224   
-240   -304   
160    -176   
-144   240    
96     -176   
-352   -368   
208    -16    
-592   240    
48     400    
112    208    
-96    336    
160    208    
96     320    
-96    128    
-64    0      
64     240    
-64    0      
-272   32     
256    80     
-224   -64    
-192   -16    
0      48     
-16    16     
48     80     
-1152  -48    
32     64     
-16    -48    
256    176    
-320   -16    
128    48     
-80    272    
80     -144   
-64    304    
16     352    
-16    64     
48     64     
0      16     
-208   -400   
-144   -512   
-432   -400   
288    80     
-368   96     
128    -208   
-128   64     
208    128    
-112   160    
-16    32     
16     160    
16     336    
32     112    
160    288    
-208   -16    
-352   -464   
160    416    
-192   -512   
16     -48    
0      192    
128    -16    
0      288    
496    752    
-384   496    
-176   -416   
0      -880   
240    592    
-48    80     
-48    64     
-96    64     
-112   64     
112    256    
-160   -160   
-48    -112   
-176   -672   
384    592    
-64    -32    
-16    0      
-48    80     
144    112    
-48    192    
-80    0      
-48    -96    
-160   32     
32     80     
-176   -400   
160    -480   
-176   -48    
32     -112   
32     208    
176    368    
80     288    
-32    0      
128    -64    
80     -176   
16     -48    
-64    -128   
112    144    
-80    16     
-48    32     
-128   16     
144    112    
-208   144    
-128   -176   
208    -96    
-192   224    
160    -48    
-96    -176   
80     -144   
96     -64    
16     16     
-64    96     
224    208    
-32    320    
-160   0      
-144   -224   
96     128    
112    128    
-128   16     
192    144    
128    64     
80     64     
32     80     
64     -32    
400    608    
-144   576    
-144   -16    
-32    -16    
48     0      
160    176    
-288   64     
-96    80     
176    80     
-144   32     
240    176    
-64    144    
48     48     
-96    80     
112    64     
-64    32     
-16    144    
48     64     
-224   -128   
-192   -32    
64     -32    
32     -272   
64     -656   
-96    128    
272    -48    
-112   48     
0      80     
-32    80     
-128   80     
288    144    
-256   -160   
-448   -32    
224    112    
-192   96     
-128   48     
128    128    
-160   0      
80     -2064  
16     16     
16     64     
-64    48     
304    48     
-96    32     
288    48     
0      48     
352    176    
-176   208    
-112   112    
224    192    
0      112    
-80    144    
-48    112    
-160   -256   
96     96     
-48    96     
336    160    
-176   16     
64     112    
112    64     
16     0      
-208   0      
-16    96     
-96    32     
144    128    
-96    -64    
-848   -320   
-128   96     
208    -128   
-64    32     
112    -1664  
32     80     
64     96     
32     48     
0      144    
-16    32     
-48    -192   
128    240    
-112   -368   
-80    32     
192    0      
-64    -272   
-64    256    
288    -160   
16     64     
-16    -1408  
112    80     
144    -16    
-96    144    
48     32     
176    192    
224    192    
-144   224    
32     48     
112    32     
-32    -32    
16     0      
-32    96     
16     32     
0      -176   
-112   -544   
208    336    
16     -592   
-48    48     
128    80     
48     -176   
-144   -32    
48     -32    
-128   32     
240    16     
-64    -64    
48     32     
160    128    
-16    -192   
80     48     
-16    -80    
48     16     
32     -288   
16     80     
32     -192   
80     160    
-112   96     
0      112    
0      48     
160    -112   
0      96     
96     -64    
-16    64     
112    -96    
192    176    
48     -208   
80     80     
128    -304   
64     32     
80     80     
16     64     
64     112    
48     -16    
-16    -48    
112    -448   
80     256    
-64    -96    
128    144    
16     16     
160    48     
128    -272   
96     -48    
32     -384   
32     80     
144    96     
32     144    
336    192    
-144   128    
-176   0      
128    176    
128    64     
-112   -336   
32     -112   
-64    -416   
-32    -16    
80     -208   
96     192    
48     -16    
32     144    
16     -16    
-32    -864   
16     -288   
-64    -560   
32     -432   
-128   -288   
304    -320   
-304   -240   
192    -768   
-112   32     
96     160    
96     48     
0      176    
-16    16     
32     -1424  
160    -48    
-48    -944   
32     -784   
-192   144    
192    320    
64     -240   
-48    -400   
192    272    
-144   -576   
160    -256   
-208   -560   
16     -272   
96     208    
-96    16     
48     -48    
-112   64     
128    80     
-96    -112   
-192   -224   
144    112    
-80    -128   
-32    -400   
32     -32    
144    -320   
64     32     
352    -304   
16     320    
-64    -560   
192    -352   
112    256    
320    336    
-176   -144   
368    -64    
-176   -32    
-96    -208   
-352   64     
0      -160   
480    -112   
-80    208    
144    0      
160    -544   
-256   -144   
192    -96    
64     144    
160    0      
-464   -288   
288    -800   
112    -112   
192    16     
-112   32     
208    64     
-48    -352   
-640   0      
-32    -96    
96     -144   
32     -160   
-80    80     
-64    -240   
-128   160    
-256   -496   
400    -464   
-112   704    
-352   -256   
128    -224   
64     592    
-496   -144   
64     -272   
-976   -640   
384    576    
-368   32     
64     -560   
192    128    
352    -320   
-368   -48    
208    96     
96     224    
-112   0      
0      -112   
-48    -96    
32     -240   
-448   80     
496    80     
-672   -48    
224    0      
-448   80     
192    48     
-32    480    
224    -464   
-240   -320   
144    -1040  
192    352    
-80    240    
160    -256   
-96    -112   
64     48     
-80    -240   
-48    -368   
192    512    
-80    -208   
-480   -608   
480    -64    
-272   496    
256    -240   
0      -32    
0      -448   
208    -304   
-640   448    
208    48     
-576   -880   
176    -1040  
80     48     
336    496    
-208   752    
464    576    
-640   -192   
320    -240   
32     48     
160    -128   
-48    -16    
-16    32     
-16    32     
-96    -16    
-16    32     
0      0      
80     96     
160    96     
-352   -192   
144    -144   
48     128    
176    336    
80     -320   
0      64     
-560   -144   
64     256    
-48    160    
-1072  64     
-272   -144   
-864   96     
-80    80     
-128   -368   
-48    160    
160    -64    
-144   32     
-48    0      
-32    224    
-240   -272   
-96    -208   
80     -32    
-144   -112   
-112   80     
240    208    
-64    464    
-32    64     
0      -48    
-224   -448   
-176   -448   
160    416    
64     144    
-64    160    
144    208    
-112   160    
0      176    
32     -112   
-16    80     
-80    -48    
0      272    
64     160    
-272   -112   
144    384    
-400   448    
-224   304    
-224   -32    
-96    -128   
0      16     
0      -16    
-48    -144   
64     16     
-176   -32    
128    32     
-112   -96    
-128   48     
96     48     
-32    144    
160    208    
-16    96     
48     96     
-384   -96    
48     48     
-64    -208   
0      32     
80     160    
-32    64     
-16    64     
-16    0      
-48    32     
-32    144    
-32    80     
48     0      
-48    96     
-256   128    
208    -48    
-320   -48    
32     64     
240    -16    
-64    96     
160    0      
-256   0      
208    32     
-112   -16    
256    64     
-112   96     
96     16     
32     96     
32     -16    
-32    -32    
-16    32     
32     32     
-96    0      
-208   16     
144    -112   
-400   -128   
-16    240    
-16    176    
-288   160    
-16    16     
-144   -64    
48     64     
-48    0      
32     -32    
-16    128    
32     112    
96     64     
176    16     
-400   -80    
112    -48    
-160   -224   
0      -208   
-208   48     
-48    80     
-96    80     
64     144    
48     144    
-240   80     
32     48     
-144   -32    
16     128    
272    32     
-240   48     
48     80     
160    128    
240    224    
-144   -16    
-16    96     
208    112    
-16    144    
-16    144    
48     176    
80     -32    
-48    32     
64     -16    
48     32     
-272   -48    
176    208    
-208   -64    
320    176    
-304   80     
32     -32    
128    16     
336    272    
-432   112    
176    48     
-80    96     
64     80     
-128   48     
-144   -48    
208    144    
-80    160    
64     176    
-256   -64    
96     112    
32     48     
-32    48     
32     64     
16     144    
320    272    
-304   160    
112    160    
-192   -128   
-64    0      
112    96     
-96    32     
112    48     
64     96     
80     48     
192    224    
-96    96     
256    160    
-144   -80    
224    -32    
320    144    
-96    0      
16     64     
80     48     
64     64     
-16    -48    
80     48     
-48    16     
32     80     
80     160    
-48    96     
16     160    
64     112    
32     64     
64     16     
32     -112   
80     -96    
128    80     
-80    -48    
80     80     
48     -64    
144    160    
-48    64     
-208   -64    
160    96     
64     -112   
16     -16    
144    128    
-144   16     
-48    -16    
96     -32    
48     128    
32     48     
-32    160    
144    176    
-112   176    
176    256    
-64    -144   
64     -1280  
112    80     
-96    -176   
-80    80     
368    -80    
64     112    
0      144    
-96    -16    
128    112    
-48    -80    
-80    -176   
80     -16    
-32    -48    
16     96     
80     32     
64     -816   
-32    0      
80     -16    
0      320    
192    384    
-16    176    
48     -96    
-224   -448   
32     -144   
64     208    
-48    160    
-16    208    
-112   -240   
224    -96    
192    400    
16     -16    
-128   0      
0      -624   
176    384    
144    160    
224    240    
-336   64     
176    0      
-240   -144   
400    432    
-160   -288   
272    544    
-144   -112   
-16    -368   
-32    16     
-16    -400   
48     96     
-16    -1056  
48     128    
-128   272    
80     -80    
-16    32     
144    0      
0      128    
96     272    
192    288    
-32    240    
-48    -32    
-144   -352   
16     -64    
224    -448   
80     48     
192    -784   
0      96     
112    16     
-16    176    
-96    -368   
48     32     
48     416    
-400   -144   
80     -96    
192    192    
0      64     
240    -48    
64     240    
304    96     
-128   208    
-16    -384   
-400   -160   
256    -1072  
32     560    
-160   -16    
224    -96    
-144   272    
-80    -128   
128    160    
32     192    
-144   64     
96     -144   
-176   -608   
256    -288   
208    208    
-16    144    
64     288    
-112   -272   
208    80     
-32    96     
112    128    
0      -64    
144    128    
192    592    
-304   352    
224    -112   
-32    -480   
-112   192    
176    -176   
48     224    
-96    32     
-96    -272   
192    0      
48     304    
96     -192   
128    240    
-144   -112   
112    -128   
672    992    
-368   -208   
-160   -848   
-16    -768   
560    304    
48     512    
144    368    
-96    -640   
464    176    
-32    80     
192    -160   
0      64     
352    112    
192    656    
160    -1152  
-16    -384   
-80    -880   
144    352    
256    -32    
-240   0      
-48    -976   
208    288    
144    544    
-368   -336   
384    -144   
0      -96    
128    0      
-256   -1280  
208    -80    
48     -112   
-192   -144   
112    608    
0      -544   
160    304    
-192   -1664  
96     48     
-32    32     
-144   176    
240    -144   
208    144    
-48    240    
32     -32    
320    432    
-352   -208   
-480   16     
-48    272    
128    -64    
0      -736   
48     -112   
48     -976   
-144   -304   
400    -1008  
48     624    
224    256    
-64    -448   
0      -112   
-128   112    
96     -128   
-160   160    
-96    16     
96     144    
-432   32     
144    0      
-128   -96    
144    32     
32     16     
96     -160   
0      -96    
80     -144   
144    -144   
-208   -304   
176    -112   
112    160    
-32    -112   
192    304    
-128   -32    
-80    -48    
16     -48    
0      -96    
176    -160   
-64    -272   
224    -608   
-48    112    
-160   -1456  
48     -416   
64     -64    
144    112    
-288   -96    
144    -144   
-160   16     
0      64     
-48    -16    
64     -16    
-1088  -32    
16     -192   
-80    -192   
80     -736   
0      32     
176    -832   
0      96     
48     -32    
0      16     
-80    -16    
80     16     
-32    176    
-128   -32    
0      80     
160    -48    
-1104  -32    
16     -192   
-432   -32    
272    -128   
-528   64     
288    -208   
-224   368    
208    0      
96     -176   
-48    -16    
128    144    
80     112    
64     0      
-224   32     
304    112    
-80    96     
112    -192   
0      -48    
32     -192   
96     208    
64     -384   
64     80     
80     -1072  
-16    112    
96     64     
-16    -32    
-816   -176   
112    -32    
-320   112    
-64    -80    
-112   64     
112    -112   
208    -96    
48     -176   
64     160    
80     -256   
-80    128    
352    -320   
-144   48     
48     16     
0      16     
128    160    
-304   48     
-112   -256   
0      -48    
-48    96     
64     -192   
80     336    
48     -48    
-176   -32    
112    -80    
80     144    
-144   0      
-1056  -16    
16     32     
80     -64    
-112   0      
144    -144   
64     -64    
112    -192   
112    -96    
80     -144   
176    48     
96     32     
16     -112   
-80    -224   
352    224    
-208   192    
-528   256    
-16    208    
-608   32     
-288   -96    
160    112    
368    496    
-112   80     
208    336    
-352   288    
-240   352    
-112   -32    
-272   -16    
-272   -176   
-128   -48    
112    0      
-240   128    
224    -48    
16     144    
128    -16    
-1136  48     
32     0      
-32    0      
32     16     
176    80     
-160   128    
16     -16    
-320   -16    
240    160    
112    128    
-144   224    
-304   32     
-48    32     
-208   -32    
-80    -160   
-272   48     
192    224    
-1104  96     
-96    208    
192    -160   
-80    64     
-16    -144   
0      64     
-32    0      
48     48     
16     64     
-64    48     
-16    -48    
-128   -112   
-128   48     
-336   96     
-176   48     
-176   -208   
-32    16     
112    -96    
-176   96     
0      16     
32     192    
-64    112    
-144   -32    
80     16     
-16    48     
48     64     
16     80     
-32    -128   
-144   112    
-80    80     
-304   -336   
80     32     
-208   16     
80     112    
-128   -16    
0      -32    
192    128    
-32    160    
-112   192    
-80    48     
80     48     
-80    0      
-16    -288   
-144   -112   
-176   -416   
176    -128   
32     80     
-288   32     
160    336    
16     48     
-208   16     
96     48     
-128   32     
64     48     
-80    80     
-16    48     
-432   -144   
144    -128   
-352   0      
-16    -640   
-304   32     
432    176    
-464   -336   
160    -48    
-160   -144   
-64    144    
-48    16     
-16    -144   
48     384    
16     0      
112    32     
-80    272    
48     352    
0      -224   
-112   368    
-96    16     
32     240    
-48    112    
-256   16     
-112   -608   
176    432    
48     -64    
0      96     
-48    112    
-192   -32    
64     144    
-64    -176   
224    352    
-384   16     
-176   -512   
-320   -848   
240    384    
16     944    
-64    288    
0      -288   
80     -32    
-112   96     
16     80     
16     96     
112    176    
-64    400    
32     16     
32     0      
-208   -64    
96     64     
-112   16     
48     112    
112    80     
-160   -224   
32     -112   
-112   80     
128    128    
-16    160    
32     48     
-16    208    
-64    -320   
192    -512   
-96    -96    
144    96     
64     512    
704    960    
-528   448    
112    -144   
-144   208    
16     32     
-336   -240   
112    -144   
80     -80    
48     112    
256    64     
-16    384    
176    272    
-48    304    
176    144    
112    64     
32     112    
-160   224    
352    416    
-288   32     
-48    -464   
128    -304   
96     272    
192    672    
32     480    
-144   464    
160    160    
-128   32     
352    160    
-544   -320   
256    -224   
112    240    
176    464    
336    336    
-96    192    
400    144    
-128   128    
-160   -320   
96     -80    
-208   64     
416    96     
48     496    
112    480    
-32    -288   
80     80     
-64    -16    
272    96     
0      320    
48     64     
-176   48     
-16    80     
32     -768   
192    -16    
16     288    
48     160    
96     32     
-32    192    
-64    160    
-80    -384   
-192   -128   
32     -272   
384    320    
-256   -1648  
48     -256   
-160   -160   
320    80     
16     336    
96     272    
-16    -240   
144    -48    
128    880    
-80    32     
0      -720   
208    192    
-144   -64    
-48    -32    
192    240    
-128   -208   
80     224    
112    176    
352    352    
-160   336    
64     464    
144    240    
64     480    
48     112    
-16    32     
-80    -128   
320    32     
-48    -48    
-80    -80    
96     48     
96     -224   
-48    -80    
80     -1104  
-96    -336   
-16    -16    
80     32     
-64    288    
144    208    
-48    -64    
32     -64    
-32    -720   
240    48     
368    64     
-192   144    
-48    176    
16     64     
320    272    
-112   -928   
128    464    
-80    288    
64     224    
112    -112   
-32    144    
64     -96    
-80    -48    
-224   -272   
112    -272   
64     -32    
160    -128   
-176   64     
272    -256   
16     -96    
64     -832   
96     64     
80     -304   
64     16     
-80    -144   
160    160    
-176   48     
80     144    
80     0      
-64    -80    
352    112    
-16    128    
144    96     
-128   -288   
32     -80    
32     -288   
240    144    
-144   144    
0      64     
-16    48     
96     176    
112    -16    
48     16     
64     -48    
64     -240   
-16    80     
128    -208   
192    128    
-128   -160   
208    112    
32     -208   
-16    32     
144    -592   
-48    -48    
96     16     
-64    64     
-16    0      
144    128    
0      112    
64     -64    
32     128    
64     -176   
48     96     
208    -64    
16     16     
80     -160   
-32    48     
176    -192   
48     176    
16     16     
-32    -64    
144    32     
0      -2400  
208    -240   
96     -16    
-128   -496   
112    -64    
-16    48     
16     0      
48     128    
-112   -112   
320    48     
-80    -368   
-80    -400   
96     0      
96     -16    
-128   128    
-528   -128   
176    -96    
-96    0      
-64    -64    
144    -48    
64     -432   
144    -192   
-64    96     
304    16     
-16    48     
112    -64    
128    -144   
0      64     
80     -512   
-96    96     
0      -16    
-48    -16    
256    80     
-112   -80    
-16    -112   
272    -144   
0      -16    
112    -512   
80     48     
288    16     
-256   192    
64     -224   
-16    48     
-224   -528   
416    64     
-288   80     
128    -224   
-384   -16    
144    -272   
96     -64    
-80    -96    
192    128    
-176   48     
32     -304   
0      -352   
-96    272    
224    80     
-96    -32    
112    -48    
96     -64    
-256   -144   
64     -48    
-1104  -240   
0      16     
-48    64     
240    0      
16     0      
48     -336   
32     -80    
-128   -1360  
160    -96    
256    64     
-64    0      
64     -272   
-96    192    
272    -32    
-16    -16    
32     80     
-64    48     
0      -16    
144    -48    
192    -192   
-160   -32    
352    80     
176    -240   
0      96     
144    -64    
-16    96     
-192   -112   
112    -96    
80     48     
240    32     
-336   16     
176    -160   
-480   0      
112    -80    
-608   -16    
16     -64    
-64    -80    
224    -224   
96     144    
272    16     
-96    -48    
-112   80     
96     0      
-96    16     
96     -48    
144    -64    
-96    -240   
-192   -64    
96     32     
-384   16     
112    -80    
96     64     
-64    -528   
16     208    
208    -1104  
144    80     
-400   192    
80     288    
-240   32     
-48    -96    
-224   16     
208    -96    
-32    64     
-48    64     
240    96     
-144   -192   
80     160    
48     -208   
-160   -96    
-16    -400   
112    16     
32     -160   
-48    -240   
32     -80    
-32    -64    
48     144    
-16    -48    
-80    -480   
-32    -144   
288    544    
-32    -272   
-208   -112   
-528   -544   
-48    640    
-128   -592   
-192   0      
-144   32     
32     -16    
128    80     
128    80     
-336   0      
304    0      
-192   -32    
-272   -128   
0      80     
-592   -80    
128    400    
-512   80     
-272   -224   
16     368    
-272   80     
16     -384   
-144   96     
-48    112    
-352   -16    
80     176    
48     464    
-32    80     
-32    112    
128    112    
-96    176    
256    224    
-224   112    
-48    16     
-160   96     
-208   -32    
224    32     
-480   320    
64     -128   
-528   -112   
64     -32    
144    -16    
96     224    
144    -32    
48     176    
336    208    
-272   288    
-48    -176   
32     -32    
432    544    
-48    320    
-192   112    
48     320    
0      368    
-640   -80    
-64    -32    
-640   -64    
-112   176    
-128   -288   
-48    -16    
-64    -192   
-112   -16    
240    32     
-96    48     
192    48     
80     208    
-128   -32    
-400   -16    
160    64     
-208   -288   
80     -176   
-432   32     
112    32     
-112   -368   
272    0      
32     16     
-16    -80    
96     96     
-544   -784   
608    -992   
-224   -288   
480    192    
-48    -96    
432    272    
-96    96     
368    416    
-608   208    
-96    240    
80     48     
-432   -432   
320    -400   
-240   0      
96     480    
64     176    
-96    -128   
-16    -80    
0      -144   
16     -352   
288    640    
432    688    
-576   -144   
-288   -656   
-96    384    
-976   80     
-32    -96    
-48    256    
-80    144    
160    96     
640    544    
144    944    
0      752    
-80    -496   
64     -112   
80     64     
-176   -400   
32     176    
-208   -64    
192    -224   
-464   -448   
-112   -80    
144    272    
48     1280   
160    -112   
-160   -192   
0      32     
-96    224    
64     336    
64     272    
-240   -144   
32     -64    
-176   240    
-288   -32    
80     112    
-176   144    
-176   432    
272    256    
-112   -96    
32     144    
0      -16    
0      -80    
64     -192   
-48    16     
80     0      
-16    96     
-64    -128   
-80    -80    
-256   -288   
-48    16     
224    80     
-80    -80    
-16    -144   
64     -208   
64     128    
112    128    
16     80     
64     -144   
-16    80     
256    144    
-272   96     
128    128    
-160   16     
0      -48    
208    128    
64     80     
-80    0      
112    128    
-64    -64    
-176   128    
16     64     
-144   -192   
-16    128    
352    208    
-224   64     
-32    144    
-16    224    
160    112    
-176   -32    
128    -80    
32     48     
-160   -16    
144    48     
-112   -64    
80     128    
192    128    
32     112    
-64    48     
-96    16     
-128   32     
80     64     
48     352    
-160   96     
-176   0      
160    80     
16     80     
64     80     
-32    32     
128    32     
32     64     
128    96     
-160   -48    
0      -128   
-80    -32    
16     96     
192    0      
-224   -80    
224    80     
128    176    
-64    16     
80     192    
112    112    
-16    96     
64     48     
80     96     
-80    48     
0      48     
96     16     
48     48     
96     224    
80     224    
-224   -128   
192    16     
-16    128    
96     -832   
-32    80     
32     32     
192    176    
32     112    
144    96     
-208   -16    
288    128    
16     96     
-32    80     
32     32     
80     128    
0      16     
-128   -96    
96     80     
240    -1776  
-16    32     
-16    64     
16     384    
160    80     
-96    64     
0      80     
160    96     
-32    16     
80     96     
32     48     
448    112    
-352   144    
96     -112   
-160   112    
160    -544   
-80    112    
16     112    
-144   64     
240    144    
32     16     
144    -32    
-144   16     
112    -128   
96     176    
-112   -128   
80     -32    
80     48     
-144   -96    
304    432    
80     -224   
-64    160    
48     -848   
112    48     
224    112    
-80    128    
0      -576   
-32    112    
-48    -96    
160    112    
-160   -240   
112    32     
96     240    
-224   -96    
112    112    
-96    -128   
48     128    
-16    -480   
0      48     
64     -48    
128    128    
-240   32     
304    160    
-48    0      
256    128    
-96    80     
-32    -144   
-112   -48    
160    -64    
64     192    
-192   -304   
336    0      
-64    -464   
144    16     
0      64     
192    208    
-16    -160   
112    80     
-32    64     
160    112    
-64    0      
384    176    
-160   352    
-48    -64    
-32    -16    
144    -176   
-128   -112   
32     -560   
64     48     
112    96     
32     256    
-32    -64    
64     32     
32     48     
96     96     
144    64     
64     -176   
112    240    
240    -400   
-256   160    
16     -192   
48     -48    
-64    -16    
128    80     
-96    -1664  
32     96     
128    208    
16     80     
176    112    
112    48     
-80    160    
464    32     
-208   112    
96     -128   
-32    528    
240    128    
-176   -64    
48     -144   
256    -32    
-80    -224   
16     112    
-112   48     
96     -608   
-16    32     
-1664  -176   
160    -1216  
-128   -320   
176    -1264  
128    -32    
240    144    
-160   -128   
320    240    
-112   -128   
0      144    
48     -32    
-16    -96    
272    240    
-208   -64    
128    32     
-1008  -176   
128    -432   
144    -240   
-48    -480   
32     -80    
112    -64    
128    144    
-64    464    
-128   -144   
16     64     
-80    128    
-80    128    
128    -128   
-48    -256   
48     -240   
-96    -32    
-16    -96    
176    208    
-32    -208   
48     448    
0      -144   
48     -208   
-48    -528   
-48    32     
128    0      
-32    176    
-96    -432   
320    16     
-32    528    
0      -288   
-48    -272   
176    64     
-336   -192   
96     -832   
-32    -176   
16     -208   
96     80     
96     -64    
-16    -32    
48     -400   
-192   64     
64     -208   
0      80     
32     48     
32     32     
-128   -16    
96     32     
-336   -176   
192    0      
64     64     
144    -48    
16     288    
112    -272   
-16    48     
80     -432   
48     0      
128    48     
32     192    
-48    96     
-16    -112   
-80    80     
80     -32    
-176   0      
192    160    
-208   0      
48     -160   
-192   -64    
32     -224   
-96    -48    
48     -224   
-128   128    
272    -352   
-16    -32    
240    16     
-112   -128   
16     16     
64     -48    
-112   -16    
192    -32    
-1312  -96    
784    496    
-448   576    
112    112    
32     352    
304    160    
-144   112    
96     -224   
-16    32     
64     -112   
48     96     
-48    64     
-64    0      
-112   32     
48     -48    
-512   -80    
112    16     
-64    96     
224    -80    
-144   112    
64     -816   
48     -272   
16     -576   
32     144    
128    224    
48     -16    
0      160    
-32    -128   
-80    80     
128    176    
368    992    
-16    1232   
-288   160    
288    -1456  
176    128    
240    224    
32     256    
224    96     
-256   0      
-112   -160   
128    -368   
-416   -528   
192    -208   
-256   176    
320    80     
-192   -272   
368    144    
-288   272    
-240   -512   
256    64     
-1024  32     
48     128    
-32    336    
-800   80     
-144   -80    
-16    -48    
-64    48     
96     48     
-64    -32    
0      64     
-208   -176   
-224   272    
-160   192    
-144   -176   
-32    32     
-80    -32    
144    0      
-272   -160   
-480   -320   
-80    64     
-464   -208   
-64    160    
272    32     
320    224    
0      -32    
-64    -112   
-224   -144   
160    48     
-304   -240   
528    368    
-400   80     
-224   -96    
-80    -208   
-272   112    
288    128    
-656   0      
-160   -400   
-672   -16    
-80    -96    
-32    -64    
-224   -64    
288    16     
48     96     
-96    -320   
-16    96     
112    128    
-32    0      
64     128    
48     16     
-144   -112   
-48    -48    
-16    -80    
-128   -192   
112    64     
-480   -16    
0      96     
-16    -144   
256    144    
-64    16     
-80    32     
16     48     
272    256    
-400   0      
32     16     
-64    48     
-48    -32    
-112   32     
80     -80    
16     80     
-560   32     
-176   -64    
224    -32    
-32    96     
80     -64    
80     96     
48     128    
-176   0      
-16    -80    
-32    -32    
16     112    
-64    -32    
-64    32     
16     48     
-16    -64    
-464   -224   
112    112    
-208   -80    
80     96     
0      -96    
16     64     
144    80     
-256   -160   
-48    32     
-48    80     
48     -16    
-32    112    
128    48     
-240   -176   
-80    -80    
16     112    
-256   96     
-32    32     
-112   80     
80     176    
16     176    
-64    96     
-160   -240   
112    -16    
144    144    
-64    48     
16     64     
144    16     
-64    -160   
-16    160    
-96    32     
304    96     
-800   80     
48     64     
-160   96     
112    -32    
-288   -80    
224    32     
-96    0      
-96    48     
80     96     
-384   -32    
288    128    
-320   112    
16     48     
-224   -32    
224    0      
-288   -48    
0      -32    
16     112    
-16    64     
-16    128    
-32    16     
176    -64    
128    112    
-64    16     
-32    80     
96     80     
-96    -48    
64     128    
-224   -64    
80     80     
16     128    
32     128    
-16    144    
-16    -32    
128    -160   
256    304    
-144   64     
-16    96     
-48    64     
112    64     
64     32     
-224   -32    
112    112    
112    64     
-240   80     
112    64     
-48    96     
48     48     
-16    48     
320    192    
-320   192    
16     112    
-160   96     
400    96     
-400   48     
192    16     
-64    -64    
48     80     
-16    48     
96     176    
80     224    
32     160    
96     192    
-128   -16    
-64    48     
160    0      
80     64     
32     64     
96     160    
-112   -64    
144    -32    
0      0      
288    96     
-96    80     
160    0      
16     96     
112    48     
32     112    
48     32     
-80    -96    
128    -256   
48     32     
32     -32    
176    192    
-192   -64    
192    32     
-32    96     
96     112    
-80    0      
128    112    
-96    32     
144    0      
64     80     
240    32     
-240   -16    
272    96     
64     -16    
-64    -240   
-16    48     
288    -48    
64     -16    
48     128    
-112   -416   
160    160    
80     -1504  
32     32     
144    80     
-16    112    
80     64     
-80    112    
64     96     
128    32     
176    64     
224    64     
-400   -352   
192    -96    
32     -32    
80     -32    
64     64     
-176   -288   
128    112    
-160   304    
-32    -32    
64     -96    
224    0      
-80    96     
16     48     
-32    112    
80     80     
-160   -192   
368    -64    
-144   32     
144    -224   
-112   304    
64     -384   
-160   128    
112    80     
16     64     
32     80     
128    112    
-64    192    
176    192    
-224   -32    
-48    -112   
-16    112    
64     -64    
96     -16    
144    -128   
160    304    
-176   -32    
192    32     
-32    -2128  
144    -48    
128    48     
32     80     
32     -80    
48     32     
32     96     
96     304    
48     -240   
272    432    
-288   304    
352    -432   
32     -96    
96     16     
-16    304    
144    -224   
-16    144    
0      -208   
128    96     
-144   -208   
96     -208   
-64    -128   
64     304    
-16    368    
-32    -224   
80     -16    
32     -80    
64     32     
64     -48    
128    512    
-112   -304   
-80    -384   
48     -592   
176    16     
-144   336    
256    0      
-64    48     
-48    144    
144    32     
-16    32     
-48    32     
176    -64    
0      96     
0      -448   
64     48     
96     -160   
32     128    
-48    -64    
288    320    
32     480    
64     272    
-64    368    
192    -32    
-64    16     
32     -160   
128    160    
-96    -64    
-16    -144   
240    -224   
32     16     
80     -16    
96     48     
64     32     
192    144    
-96    0      
96     -16    
96     16     
144    48     
128    96     
48     -240   
80     176    
224    144    
176    704    
-144   80     
80     -176   
48     -128   
-48    48     
-48    -1008  
-48    192    
240    32     
16     -336   
160    1376   
-16    1040   
-176   208    
128    288    
-192   -1040  
0      -224   
-80    -32    
192    -16    
-16    208    
-96    -192   
240    240    
112    64     
-16    464    
80     -448   
-64    -320   
-32    -464   
-1104  -80    
128    -224   
528    656    
-704   -912   
432    -144   
-48    464    
16     -304   
112    -144   
16     96     
-96    192    
16     112    
-16    -368   
96     352    
368    352    
-192   -208   
-496   -512   
272    96     
64     128    
112    -80    
240    48     
-288   -320   
32     -432   
-32    -944   
96     96     
-80    96     
32     -160   
144    0      
-128   224    
-32    -48    
-64    -176   
-176   -112   
288    112    
-528   48     
32     -112   
96     -112   
128    -384   
48     32     
128    144    
80     80     
-128   -368   
32     32     
160    -192   
32     192    
-336   64     
16     -512   
-608   -512   
256    -304   
-608   96     
-112   -160   
-368   -48    
48     128    
-272   -48    
-112   -512   
160    48     
-128   -896   
96     32     
-80    0      
176    48     
-224   -48    
0      -256   
-224   -144   
64     -80    
-176   -48    
16     -96    
-544   96     
-176   -176   
-208   -64    
176    -256   
-160   -16    
48     -672   
112    80     
736    416    
-976   -48    
384    0      
-384   64     
144    -128   
-288   -16    
-96    -64    
0      0      
-800   -160   
80     -144   
0      -16    
-64    -304   
-80    96     
80     144    
32     160    
-80    16     
-64    -80    
-176   0      
-176   -192   
208    64     
48     32     
-32    0      
-80    -16    
192    176    
-288   -96    
128    48     
224    -160   
-48    96     
96     -560   
-96    16     
-144   -32    
96     64     
0      -48    
16     144    
-32    -48    
0      -48    
-208   -64    
32     -64    
-80    -80    
0      -160   
96     160    
96     -96    
144    48     
128    -384   
144    160    
-16    96     
-112   112    
64     48     
0      -16    
-64    0      
176    0      
-96    16     
240    336    
-192   112    
-192   -16    
272    80     
-640   -112   
32     64     
-592   -16    
-208   96     
64     64     
-1136  -128   
128    0      
-1360  176    
-112   112    
0      48     
96     0      
-64    -128   
-96    -112   
-208   -128   
80     208    
-48    0      
240    320    
-304   -48    
-224   0      
160    96     
-608   -32    
-144   32     
-272   -16    
32     32     
144    -48    
176    352    
-160   96     
-272   -112   
-32    -272   
16     176    
112    -96    
-208   -48    
112    48     
-272   48     
0      64     
80     16     
-96    0      
-16    -16    
-16    0      
-256   48     
-208   -16    
-112   -128   
0      32     
-176   -160   
240    112    
-80    -80    
-128   -48    
48     80     
-144   16     
0      80     
0      48     
-32    96     
-48    48     
-144   32     
-160   -32    
-32    16     
-912   96     
-112   112    
16     -16    
64     64     
128    -192   
-144   -112   
80     64     
-48    0      
-48    48     
-96    -16    
-208   48     
-112   -32    
-16    64     
-128   0      
112    32     
32     192    
-160   192    
-192   -80    
80     0      
240    80     
-16    128    
-32    -80    
48     96     
48     16     
-112   32     
96     -32    
-64    32     
384    48     
144    176    
-288   160    
-144   -16    
0      -32    
-16    -176   
-176   -528   
-32    -224   
96     -32    
-32    -192   
-16    -80    
-32    144    
-80    -80    
176    208    
64     192    
-48    -80    
-208   -80    
144    -16    
-80    -16    
-256   0      
-176   -32    
48     144    
64     48     
96     304    
-128   128    
-96    144    
64     0      
96     64     
0      -16    
-288   -192   
16     -128   
0      64     
-416   -176   
128    -48    
-224   192    
-240   -288   
-272   -96    
-192   -384   
32     -448   
-96    32     
192    496    
-112   -32    
-64    128    
112    -32    
-176   32     
80     112    
-96    48     
176    160    
80     160    
240    416    
-256   -208   
-64    -320   
16     -112   
-32    400    
208    384    
-32    224    
-32    32     
160    48     
-256   224    
-80    -176   
176    -80    
-64    176    
16     64     
-96    176    
128    272    
-176   -32    
192    -128   
0      176    
208    368    
-96    496    
-32    -160   
272    -688   
160    656    
-256   80     
192    128    
48     144    
-96    -64    
-64    304    
-320   -176   
416    -208   
-32    352    
16     464    
480    336    
-512   320    
80     -688   
16     400    
192    288    
144    176    
-176   128    
-32    32     
32     32     
-304   -64    
320    128    
-128   0      
16     96     
16     112    
0      192    
48     -32    
-80    -320   
176    80     
-48    176    
-192   -240   
64     -64    
-80    368    
352    64     
-400   48     
32     -624   
-48    -112   
-32    -16    
112    64     
-16    352    
-160   -336   
-80    192    
144    192    
0      -32    
32     96     
-64    -16    
-16    32     
64     176    
48     128    
-16    0      
128    448    
64     544    
32     416    
16     256    
-128   -144   
240    80     
-32    96     
208    16     
16     64     
-80    16     
-16    32     
80     96     
32     96     
48     48     
48     96     
-16    -64    
-144   -288   
432    288    
-384   -784   
368    128    
-464   -48    
160    -688   
-16    -272   
-160   64     
160    -80    
-64    224    
32     112    
112    -240   
-64    -272   
128    128    
-128   -80    
16     -208   
240    80     
-16    -272   
-128   16     
0      -656   
144    624    
112    128    
-176   144    
240    288    
80     -16    
-176   -448   
256    208    
-32    32     
-64    -96    
16     -144   
176    736    
32     -112   
112    272    
112    272    
-304   -496   
96     352    
176    352    
-128   -16    
160    64     
64     112    
-16    176    
32     -80    
-16    -144   
240    224    
64     368    
-288   -592   
320    -400   
-80    432    
320    624    
-176   -304   
64     -240   
144    -48    
464    720    
-192   -16    
16     -64    
224    64     
-64    304    
96     16     
-48    -48    
48     464    
32     -80    
-112   -80    
112    -336   
320    352    
-208   48     
-16    96     
-96    -544   
16     208    
0      112    
80     176    
48     0      
64     128    
-96    32     
224    -80    
-352   0      
208    -128   
-80    96     
-16    -336   
48     64     
16     -736   
-16    176    
48     176    
-32    48     
224    128    
-128   112    
144    -128   
-96    192    
240    48     
-80    -112   
96     160    
96     -304   
48     208    
-32    -656   
-96    208    
-32    -416   
48     -464   
48     16     
416    80     
-96    192    
416    208    
-80    96     
208    -48    
48     272    
16     -336   
80     -48    
128    -48    
80     192    
-32    -208   
-16    224    
160    -48    
-128   64     
240    -256   
-112   352    
192    -96    
-192   -112   
-32    -192   
-48    -112   
160    -784   
160    -32    
64     -208   
32     -48    
320    192    
-16    32     
0      -64    
16     80     
320    176    
-288   0      
112    -2320  
16     160    
160    192    
-224   96     
-400   368    
96     -960   
-16    128    
208    -1184  
80     64     
-224   80     
128    112    
-32    64     
64     -176   
336    176    
176    240    
96     -48    
-80    176    
80     -16    
128    -240   
-784   -16    
208    -256   
-32    -96    
128    -560   
112    -48    
64     -688   
160    -320   
208    -80    
192    -48    
-32    -128   
-48    80     
80     -48    
-48    -32    
32     -176   
16     -32    
128    96     
-128   48     
96     -16    
-64    -48    
48     0      
304    -128   
-128   -144   
96     -432   
-96    -80    
192    -48    
48     144    
32     -48    
160    192    
-160   -64    
-16    -96    
176    112    
32     32     
-400   -64    
64     -192   
48     -80    
144    -368   
192    32     
-192   -96    
144    -112   
-128   16     
112    64     
-96    16     
96     48     
-64    -64    
-32    -32    
32     -32    
-96    -96    
-912   352    
64     -64    
-64    -128   
48     32     
160    32     
-256   -496   
-64    -192   
224    -480   
96     128    
-48    32     
336    176    
-208   208    
80     48     
-160   -16    
80     -144   
-160   32     
-32    80     
-896   -16    
16     64     
48     -160   
16     -320   
80     64     
48     -240   
144    96     
-16    16     
16     -48    
48     -48    
-80    -96    
-16    -32    
32     -176   
-16    32     
48     80     
-240   16     
64     -176   
-48    -48    
224    -288   
160    80     
-32    176    
16     208    
-48    -48    
32     -176   
48     0      
-128   32     
-368   -112   
240    -64    
-80    176    
-80    -160   
-288   -16    
112    -256   
128    -32    
-112   -384   
112    -48    
48     -464   
112    -16    
-16    48     
48     -192   
-96    -224   
96     -96    
-80    192    
144    32     
-416   -384   
224    64     
-400   368    
80     48     
176    -48    
-48    -240   
144    80     
-1040  -384   
144    416    
-256   -320   
-96    -64    
-144   448    
224    -624   
-160   464    
16     -64    
-64    176    
112    -336   
-16    -96    
-576   -16    
-288   -80    
-512   -544   
-48    208    
-48    -16    
-80    -32    
-64    96     
-400   240    
-288   -144   
-592   -64    
64     0      
-16    -272   
-64    -240   
80     128    
-80    144    
-320   -256   
208    240    
-368   -112   
192    16     
-192   -112   
-80    -224   
32     -320   
-80    96     
-64    288    
-112   -16    
32     192    
-32    160    
-128   -96    
-64    -160   
80     160    
112    544    
-288   -288   
-16    -448   
-32    304    
-80    -96    
48     -112   
-240   16     
-176   -432   
448    96     
32     96     
48     96     
-688   -800   
960    320    
-848   992    
224    -384   
-16    48     
256    416    
-208   224    
-128   16     
192    -144   
-288   560    
176    -432   
-432   -112   
208    304    
-176   -112   
112    192    
-288   -192   
-80    16     
-528   304    
64     -80    
-112   624    
32     -128   
-224   544    
-320   -224   
128    -400   
-16    592    
-16    144    
-32    -288   
-112   160    
-64    -160   
32     464    
-176   0      
-32    112    
-240   -128   
-64    96     
48     -208   
-64    -96    
48     96     
-64    32     
128    208    
-240   32     
-32    96     
64     -32    
-192   32     
48     0      
-80    -16    
144    64     
-32    384    
-320   -208   
400    384    
-96    -208   
320    368    
-176   240    
32     -208   
-48    272    
-240   -224   
48     -16    
64     224    
-128   16     
-80    176    
144    368    
-480   240    
128    -176   
-48    320    
-80    -64    
-416   0      
-144   208    
128    -624   
-128   128    
384    416    
-464   208    
288    96     
-80    -96    
128    -224   
-144   128    
-32    -496   
-16    -176   
144    240    
32     0      
-96    128    
0      16     
-16    80     
-32    48     
0      48     
80     112    
16     64     
352    336    
-224   80     
-208   16     
-208   -80    
-208   -128   
64     -416   
-32    416    
-176   -112   
-16    96     
32     -32    
160    352    
-112   464    
80     -80    
-48    16     
144    80     
-64    128    
80     720    
32     224    
-112   48     
96     160    
-192   -240   
128    -208   
-224   -48    
-48    -144   
-80    64     
240    48     
0      -112   
32     80     
0      16     
48     -64    
32     32     
48     128    
-288   -448   
-96    -784   
192    -400   
-368   -80    
240    -144   
-352   240    
96     288    
144    336    
-48    176    
48     176    
-80    16     
112    16     
64     192    
-64    80     
-32    48     
128    48     
64     32     
-80    16     
-80    -64    
-32    80     
128    96     
-160   48     
64     96     
-400   -160   
384    0      
-128   128    
-96    -16    
16     16     
80     0      
-96    -96    
112    -368   
0      128    
192    224    
-336   16     
208    320    
16     96     
-64    48     
128    96     
80     0      
48     80     
160    208    
-224   32     
144    112    
-144   112    
112    0      
-48    96     
-96    80     
96     192    
-80    128    
-64    -128   
192    176    
-96    48     
0      -64    
304    80     
-128   64     
112    48     
112    80     
-16    80     
80     -16    
-32    -16    
128    32     
-16    96     
-176   -144   
272    -272   
-272   -752   
224    32     
-112   -240   
-160   16     
0      144    
0      544    
240    288    
0      160    
-224   32     
-304   0      
-80    -224   
240    64     
0      -128   
-48    0      
80     112    
0      -160   
-16    192    
16     -1248  
96     16     
-16    -144   
-80    -32    
16     0      
128    96     
-128   64     
16     112    
96     96     
-32    208    
48     96     
256    256    
48     320    
-192   128    
16     32     
160    -400   
-80    80     
96     112    
-80    96     
176    240    
-176   48     
16     208    
128    464    
32     -192   
16     144    
-16    0      
-48    -112   
272    32     
80     -32    
48     32     
-176   -832   
192    96     
-16    -560   
64     64     
32     -32    
48     -16    
48     -112   
-80    128    
80     0      
80     144    
-192   -48    
0      128    
96     64     
-96    -80    
128    48     
48     -96    
-96    48     
-32    -16    
112    80     
64     -960   
208    288    
-336   48     
48     112    
128    80     
0      48     
144    64     
-48    16     
224    176    
-16    48     
80     112    
96     128    
112    144    
144    -224   
-192   80     
208    -256   
-128   48     
48     16     
80     144    
48     112    
144    48     
-176   0      
272    -400   
-96    144    
80     -48    
-160   16     
96     -256   
176    112    
-144   32     
96     208    
32     -272   
32     96     
160    192    
-96    64     
48     0      
-16    -64    
304    224    
-256   64     
-112   368    
-96    -160   
144    144    
144    -224   
80     96     
32     0      
0      -80    
96     -400   
0      -32    
288    112    
-144   -2272  
16     -80    
-32    -16    
0      -976   
112    -240   
64     -1504  
-32    -192   
144    144    
80     176    
-32    -96    
48     -464   
80     -608   
192    368    
-112   -512   
128    496    
112    -208   
-48    -800   
0      208    
96     -416   
80     64     
-112   -1248  
48     0      
160    416    
-64    -144   
144    208    
96     112    
96     -96    
160    208    
64     -176   
80     16     
48     32     
16     0      
-800   368    
64     -544   
96     -48    
0      0      
160    0      
-16    -96    
32     -80    
96     -288   
48     -32    
16     -112   
128    176    
-48    -336   
224    608    
16     112    
80     -416   
32     -16    
352    32     
96     368    
0      -176   
96     -128   
288    -64    
-16    144    
-64    -752   
128    0      
32     224    
64     368    
384    208    
-272   160    
-112   -96    
-304   -464   
-240   -352   
224    16     
-416   288    
-32    -16    
144    -432   
112    -464   
64     -64    
-112   -320   
-208   32     
224    -160   
-208   -96    
-112   -400   
256    496    
-32    288    
-80    80     
-96    -144   
96     -96    
-432   -128   
-160   -208   
320    -288   
-112   96     
128    -16    
-64    -176   
48     192    
48     288    
16     112    
-96    -144   
112    -144   
128    384    
144    192    
-560   -608   
-96    -896   
64     224    
96     656    
-208   336    
32     -256   
48     -48    
192    -16    
-128   80     
48     -320   
64     -320   
640    512    
-672   768    
256    -480   
-192   -528   
-384   400    
-160   288    
224    -32    
-64    176    
-640   -1360  
288    -112   
48     880    
112    -368   
64     32     
48     -192   
32     144    
96     144    
-288   -304   
-432   -640   
160    528    
16     432    
-464   -160   
32     -368   
16     -80    
-144   208    
-64    -496   
336    256    
64     192    
128    96     
16     80     
240    -128   
96     336    
-16    -336   
48     112    
-160   -256   
16     -240   
-160   -64    
288    -448   
-224   400    
80     -256   
-192   -608   
336    304    
-128   -256   
96     -112   
272    -464   
-1760  256    
192    -256   
-880   16     
192    512    
-176   -144   
-96    -224   
48     288    
-176   -240   
80     -288   
176    544    
-1072  -240   
352    144    
-816   -608   
144    16     
-160   144    
48     672    
-256   240    
-224   -176   
-96    -304   
-992   -96    
-64    352    
208    208    
-320   -496   
-272   -96    
96     400    
-192   32     
320    128    
-560   -528   
208    176    
16     -96    
-144   -144   
0      48     
-432   -144   
-48    48     
-320   -32    
-96    128    
-1072  80     
-96    80     
16     -160   
-48    0      
48     -160   
80     -32    
-64    -288   
-96    64     
-48    -32    
80     16     
-32    -112   
0      -112   
-80    -32    
-32    16     
-64    -16    
-256   -16    
-64    96     
-112   -16    
-16    -64    
16     -96    
80     112    
16     -96    
64     160    
-32    176    
-96    144    
-16    32     
48     112    
144    160    
-192   96     
-96    128    
128    -32    
-96    112    
-560   -16    
-16    16     
-16    -64    
128    80     
48     -32    
-48    112    
-16    -112   
160    -240   
-16    -64    
48     96     
-32    48     
-240   -144   
0      -32    
0      96     
176    144    
-544   -128   
272    112    
-336   0      
208    160    
-160   32     
-160   32     
96     112    
-80    48     
-16    48     
96     32     
-320   -96    
-144   96     
-464   336    
448    -16    
-208   -32    
-176   -208   
-224   144    
112    -208   
-64    -176   
112    16     
-112   208    
128    48     
-112   48     
80     32     
-128   0      
80     80     
-96    -32    
352    96     
-208   96     
160    80     
-272   -224   
144    0      
-208   16     
0      -32    
64     240    
224    16     
-128   64     
-80    -64    
-32    16     
128    112    
-32    48     
32     272    
304    112    
-32    -144   
48     32     
32     -16    
16     144    
80     80     
-64    64     
96     32     
-128   -16    
-64    -144   
544    64     
-256   32     
208    -96    
-96    -80    
16     -80    
0      16     
-224   -128   
48     64     
-176   -32    
128    240    
80     176    
-128   112    
32     32     
128    80     
144    64     
-48    -16    
208    -32    
-128   144    
64     -16    
-464   48     
288    128    
-240   -48    
144    160    
32     48     
-208   -112   
16     160    
336    48     
-240   144    
288    48     
-448   0      
208    128    
-224   48     
64     32     
-64    64     
-112   16     
160    256    
80     160    
-48    128    
-64    -32    
-32    -128   
-128   32     
32     64     
64     48     
16     32     
-144   -48    
224    80     
48     160    
-128   32     
80     64     
32     80     
16     32     
-288   -32    
64     -16    
16     -16    
0      80     
48     0      
-16    112    
-16    -128   
48     0      
32     112    
-80    48     
128    144    
-32    64     
48     0      
16     16     
208    144    
144    144    
96     224    
-128   144    
64     96     
16     80     
-64    160    
-48    64     
-48    48     
128    128    
240    320    
16     16     
-112   -16    
48     144    
0      48     
64     128    
-128   96     
128    -96    
128    0      
0      128    
-160   256    
144    224    
64     80     
160    256    
160    256    
-160   64     
80     112    
32     160    
48     112    
128    -176   
64     0      
112    112    
64     -176   
80     112    
80     -1968  
80     96     
80     96     
-16    112    
-96    -160   
-16    -416   
64     -32    
304    400    
-208   -400   
192    112    
192    336    
-256   272    
208    -256   
256    160    
0      160    
-48    -208   
32     96     
-48    400    
32     160    
-112   -80    
80     80     
32     192    
-16    208    
80     -192   
-32    -144   
48     96     
-48    -144   
160    0      
-80    -176   
192    112    
128    -288   
80     176    
160    -160   
0      32     
240    304    
-48    128    
16     -32    
112    96     
16     304    
144    -240   
-160   -416   
112    -272   
160    64     
96     -192   
96     112    
-64    -320   
240    144    
-64    -944   
144    112    
0      80     
64     112    
48     48     
96     96     
-32    16     
80     128    
64     48     
0      32     
80     -32    
96     48     
416    416    
-144   -80    
128    128    
80     80     
-16    176    
160    -144   
0      0      
192    -32    
-384   -400   
416    -272   
128    128    
160    -16    
400    -256   
128    240    
224    -592   
96     144    
160    144    
384    16     
-272   -832   
256    -80    
288    96     
208    496    
96     144    
64     -48    
224    -128   
-48    32     
-48    -32    
176    -816   
352    -224   
-64    -224   
-160   -304   
320    80     
48     416    
160    -128   
-48    448    
-160   -224   
208    -96    
-64    208    
-16    -240   
-192   -112   
192    160    
-96    128    
128    -240   
224    224    
448    384    
-336   48     
192    -384   
400    608    
-240   -288   
112    -144   
-496   -912   
416    -224   
-112   496    
-32    -1568  
112    -2272  
-80    272    
272    -144   
-48    -176   
-96    -1744  
256    -16    
-160   -16    
-48    -256   
320    272    
-96    16     
112    16     
-96    -128   
-240   -960   
-464   -912   
816    -96    
-608   224    
176    -784   
256    -608   
176    240    
336    272    
-80    48     
16     -384   
128    -112   
128    320    
192    80     
-128   -384   
176    -272   
64     -448   
112    -64    
-32    224    
32     16     
-1232  -272   
64     -464   
160    -144   
-64    -256   
-112   -96    
160    -224   
96     0      
16     -432   
0      -48    
128    -96    
-208   64     
160    -32    
-144   -16    
0      -176   
-160   -192   
-384   -208   
96     -288   
-176   -16    
112    -64    
32     -112   
-112   -512   
-80    -128   
-112   -576   
0      -128   
128    112    
240    256    
96     96     
208    0      
-192   0      
96     -64    
32     -48    
48     -64    
-352   -160   
32     112    
304    0      
160    -32    
-32    -96    
-240   -16    
208    144    
0      -32    
-96    80     
128    -320   
80     -176   
96     96     
144    48     
-112   -224   
224    -16    
-448   -304   
64     -544   
-544   -224   
80     -192   
48     -80    
-32    -496   
32     112    
272    -592   
-336   176    
112    -80    
-32    -80    
96     112    
192    352    
-192   64     
-240   -48    
-224   -144   
176    -48    
-240   384    
-16    -64    
32     -64    
144    -368   
80     -16    
48     -1120  
0      176    
80     32     
16     -112   
80     16     
-48    80     
-192   -32    
48     -48    
48     -32    
-16    16     
-144   32     
64     -208   
-48    0      
48     -304   
32     80     
32     -272   
16     -64    
16     -32    
128    -96    
-368   0      
16     -16    
32     32     
-96    -16    
-16    -112   
160    -176   
-240   128    
304    -128   
-112   16     
96     -96    
112    48     
-256   -192   
496    64     
-304   48     
-16    -96    
-48    48     
192    64     
-80    -128   
-64    -144   
32     -160   
-96    -64    
-96    16     
48     -80    
32     16     
-752   -112   
-48    176    
144    80     
-208   48     
48     112    
-464   32     
32     48     
-64    48     
144    32     
-208   80     
192    96     
-176   16     
32     96     
64     64     
-16    48     
-560   -320   
0      -16    
32     -48    
-112   48     
-144   80     
-80    48     
-16    288    
-1120  -208   
32     112    
-16    16     
-64    48     
64     16     
80     80     
-176   -32    
80     48     
-352   -304   
240    0      
96     352    
-208   32     
16     48     
-368   -32    
-144   16     
32     64     
-288   176    
-720   16     
-112   48     
-672   -288   
352    -288   
-208   -112   
192    32     
-112   -96    
-32    -80    
400    32     
-192   304    
96     144    
-464   -224   
256    0      
-80    128    
96     -64    
-64    112    
32     0      
-144   -96    
112    192    
144    208    
-320   32     
176    144    
-16    208    
-288   32     
-80    0      
64     80     
-64    -96    
32     144    
-112   32     
16     128    
-528   -144   
208    208    
-1088  -96    
-144   176    
48     -32    
64     128    
-112   80     
-112   16     
-128   208    
-48    16     
-48    -64    
48     -16    
32     112    
64     256    
48     160    
-336   -48    
32     0      
-256   32     
-144   -48    
48     -176   
-112   80     
-48    64     
-160   80     
176    176    
-208   144    
-272   -80    
112    -48    
80     16     
-112   80     
48     288    
-240   48     
320    160    
-336   -48    
80     48     
-16    -80    
-48    48     
32     32     
-48    96     
160    112    
-224   -16    
176    128    
-240   48     
-80    0      
32     80     
48     -48    
-112   0      
-32    144    
-96    -80    
320    544    
-96    416    
32     112    
128    288    
80     144    
-32    256    
-48    160    
-240   -368   
-64    240    
112    544    
-48    -336   
144    64     
-608   -1136  
192    384    
-160   -288   
16     512    
-32    96     
-176   -288   
96     176    
-16    -16    
-144   64     
16     48     
-48    112    
368    112    
-256   32     
80     -16    
-16    80     
-16    16     
48     128    
304    176    
-320   -272   
144    -144   
0      64     
128    544    
-64    -16    
48     -144   
16     144    
32     48     
-80    320    
160    192    
-272   224    
96     288    
-80    -256   
112    -32    
-160   -272   
0      -80    
48     -64    
-32    -32    
32     48     
-16    144    
176    112    
-112   32     
32     32     
-256   -272   
32     -496   
-32    -64    
48     80     
-48    32     
16     192    
48     112    
-32    192    
-48    128    
160    112    
-48    -48    
64     160    
-224   -48    
32     -48    
128    0      
0      112    
48     48     
112    32     
-64    144    
80     -64    
0      288    
192    112    
112    112    
-16    64     
64     112    
-16    128    
80     32     
-64    96     
32     16     
96     192    
208    208    
-16    64     
-128   -128   
-16    -144   
96     -272   
48     -240   
160    -32    
16     128    
-224   0      
-16    -368   
-64    -464   
112    -192   
64     16     
-80    32     
96     -32    
-128   -304   
320    -16    
-160   144    
96     -128   
48     -64    
-16    -240   
16     -144   
-96    -96    
112    16     
-80    80     
608    592    
-528   -160   
64     320    
16     -96    
176    64     
-272   288    
240    480    
48     -96    
16     32     
208    400    
-128   -368   
0      16     
16     -1056  
144    400    
-80    80     
16     0      
240    80     
80     0      
64     96     
48     32     
176    -224   
-112   -16    
240    416    
-160   -224   
96     256    
48     -144   
-32    256    
128    -944   
-80    32     
144    0      
-16    -16    
32     -320   
-96    -192   
288    16     
-112   64     
-128   64     
176    160    
-112   112    
-64    -48    
352    496    
-336   256    
32     192    
-272   -448   
240    64     
48     16     
176    48     
-224   64     
32     96     
96     112    
48     192    
32     48     
112    256    
-160   144    
-80    -144   
-64    112    
-160   -336   
80     -144   
64     64     
48     112    
-128   -512   
-176   -80    
160    -48    
176    272    
-208   16     
-208   176    
256    -112   
-48    160    
144    96     
-128   48     
192    80     
-32    -64    
80     80     
0      256    
160    112    
-160   -400   
80     96     
-16    -16    
-16    80     
0      48     
48     64     
-16    16     
-16    80     
32     48     
80     -192   
-96    48     
48     -16    
-48    -32    
96     -64    
128    64     
-80    -144   
-16    48     
144    208    
-32    144    
-80    32     
160    -16    
-176   -176   
144    -336   
-112   96     
64     -112   
64     112    
32     -144   
-80    -80    
16     -80    
176    144    
-112   -208   
0      96     
208    32     
48     128    
-32    48     
112    -144   
32     80     
96     -64    
-160   192    
64     -112   
208    240    
-256   32     
208    112    
-64    -192   
-32    -48    
320    -208   
-176   192    
96     -144   
-224   -688   
352    64     
-192   -656   
320    -320   
-32    -64    
0      -176   
208    -80    
128    -208   
-160   -80    
0      112    
192    -112   
-48    16     
32     64     
224    -208   
-208   64     
160    -80    
32     64     
-48    -80    
32     -336   
-160   -80    
32     -240   
112    -32    
-48    -880   
80     -48    
0      -496   
160    48     
-16    80     
16     -32    
176    48     
-32    0      
-96    -112   
128    320    
32     112    
-128   -144   
-448   -48    
80     -320   
-16    -160   
64     -528   
32     64     
-96    -224   
208    0      
384    448    
-464   -80    
144    -112   
-64    80     
96     -80    
0      80     
-144   -160   
-32    -128   
-336   16     
-112   -96    
-112   64     
192    160    
-16    64     
128    48     
-48    -240   
112    -464   
0      112    
240    128    
128    144    
64     -128   
-112   -192   
-128   -80    
160    -112   
-112   0      
64     -16    
16     48     
-176   -144   
208    -128   
-48    -416   
32     -48    
64     -160   
48     80     
32     -32    
160    128    
16     -32    
96     -80    
-144   -112   
48     -80    
-128   -32    
272    96     
-1040  128    
-144   -128   
-688   -192   
-32    -96    
208    -32    
-16    -240   
112    128    
-32    -512   
16     64     
32     32     
368    336    
-288   304    
-96    32     
-160   -64    
80     48     
-16    288    
-240   240    
-544   16     
48     -48    
80     80     
192    -336   
-144   128    
240    -512   
-80    16     
64     0      
16     32     
288    192    
-224   80     
-144   -48    
80     64     
0      32     
16     -144   
-128   64     
448    0      
-224   224    
-112   -368   
-160   48     
368    -80    
-112   80     
0      80     
-112   -64    
-480   -16    
48     -64    
64     112    
160    32     
-176   48     
32     -208   
160    0      
192    -224   
-112   304    
176    0      
-160   96     
-128   -48    
304    -64    
32     48     
-144   -160   
96     -96    
208    64     
80     144    
-32    96     
-112   -16    
-240   -496   
-208   -80    
-192   -288   
0      -16    
-208   0      
-32    -160   
-208   -96    
-544   416    
-16    384    
-944   -144   
48     96     
-96    -16    
-112   -16    
32     64     
-32    304    
-544   16     
-272   -352   
48     -448   
208    304    
-64    -368   
-128   464    
32     -160   
-224   -80    
48     96     
-224   -160   
-48    176    
-368   48     
64     -320   
-64    256    
-192   0      
16     -128   
16     64     
-128   -48    
0      -16    
-272   -384   
32     -160   
-80    -320   
128    -272   
-48    256    
112    96     
-192   32     
-224   80     
-208   -288   
-80    192    
48     128    
-160   -64    
112    96     
-160   -144   
256    128    
-144   64     
80     64     
16     48     
-112   -16    
16     64     
-224   -80    
48     160    
-48    48     
-112   432    
-288   240    
-304   -16    
16     -96    
32     320    
-48    224    
208    48     
32     288    
-144   0      
-144   0      
-64    -80    
256    224    
-192   256    
144    272    
-176   224    
-128   48     
-208   -48    
-80    32     
-720   -64    
32     80     
-32    -64    
224    32     
-80    224    
-16    64     
-128   80     
16     16     
-64    80     
-64    -112   
192    64     
-48    320    
-64    432    
-384   -176   
80     48     
-496   176    
80     -112   
-16    -128   
-32    32     
96     112    
-112   -144   
128    -96    
16     -80    
128    416    
32     336    
-48    -32    
-144   -32    
0      48     
-48    32     
16     64     
-512   -32    
-128   -48    
-96    -464   
304    96     
0      512    
0      176    
-64    -48    
48     -16    
-176   16     
112    -112   
-80    224    
-272   -448   
624    -144   
-144   752    
368    96     
-368   208    
-48    -112   
64     224    
-80    -192   
176    192    
-64    128    
64     -208   
-64    384    
-16    192    
64     -80    
64     176    
80     32     
64     192    
-272   -304   
128    16     
-128   112    
80     48     
-112   -336   
-272   -592   
48     -208   
-32    0      
16     0      
224    352    
-112   256    
16     160    
0      64     
-176   -16    
128    80     
-512   -576   
64     -224   
-80    32     
64     48     
48     192    
240    256    
304    480    
-224   0      
-32    96     
272    -32    
112    112    
16     128    
-160   48     
-144   -144   
160    208    
-240   -64    
128    80     
0      416    
272    128    
-368   -496   
192    224    
32     96     
-208   -80    
-32    112    
320    80     
-480   112    
256    64     
-400   176    
224    16     
-240   96     
288    0      
0      160    
80     64     
-80    96     
160    64     
80     128    
0      240    
32     112    
-176   0      
112    0      
160    176    
-256   176    
96     64     
-96    32     
256    64     
-288   -160   
336    -496   
80     -48    
96     128    
288    240    
-256   0      
128    48     
-48    112    
0      16     
-96    -64    
16     160    
-16    96     
320    336    
-192   80     
64     16     
0      -64    
80     -480   
16     80     
64     32     
96     128    
128    96     
32     0      
176    128    
96     96     
0      64     
-32    112    
-16    -96    
224    176    
-48    -80    
64     64     
-80    -16    
80     -16    
96     192    
48     208    
144    -80    
-192   64     
160    96     
64     64     
16     80     
-16    80     
112    256    
128    16     
-32    304    
96     64     
-144   48     
304    160    
-304   -1104  
112    96     
0      64     
80     112    
176    112    
-112   32     
144    144    
-304   -80    
304    80     
-64    64     
-32    -16    
192    80     
-16    48     
-16    -208   
240    336    
-192   -432   
16     32     
144    -880   
32     0      
112    -32    
0      96     
48     -32    
0      80     
128    64     
48     -144   
32     -16    
176    80     
-192   16     
336    32     
48     128    
-32    -32    
144    80     
16     -304   
80     144    
64     112    
16     32     
48     -400   
48     240    
-48    80     
160    272    
0      16     
16     -32    
80     -16    
128    -16    
176    240    
-48    -96    
208    144    
-96    -832   
208    192    
0      -1072  
-32    160    
176    32     
-48    80     
-80    160    
144    48     
32     -48    
96     128    
-368   -288   
432    -48    
128    208    
-304   -160   
208    80     
-96    -304   
-16    320    
208    112    
-32    16     
-16    -400   
0      144    
-160   96     
176    128    
32     80     
112    -224   
-160   144    
208    -576   
-96    32     
112    -64    
-48    -240   
96     -240   
80     160    
-48    -48    
96     128    
-80    -416   
80     96     
-96    224    
96     112    
16     16     
48     -464   
0      64     
256    -224   
-208   -16    
256    -48    
16     112    
96     0      
304    336    
-384   0      
-48    0      
48     -16    
48     176    
-80    -176   
64     -320   
448    144    
-112   -16    
-80    -400   
16     128    
-160   80     
224    -160   
-96    176    
288    -224   
-464   -208   
224    -288   
0      176    
-16    48     
192    -528   
-112   128    
-48    -608   
0      -208   
160    -48    
112    -80    
-112   -80    
192    -912   
48     -192   
128    64     
48     -32    
192    224    
-224   144    
-48    -224   
-96    -128   
-48    -208   
272    320    
-816   176    
64     -160   
-624   0      
304    -336   
128    -64    
224    64     
-320   48     
96     -960   
128    176    
-48    112    
0      -96    
240    -64    
-160   80     
16     -336   
-32    -112   
32     -256   
-16    -208   
-256   -48    
272    96     
144    16     
16     112    
96     -16    
128    -224   
304    240    
-176   0      
96     -48    
144    -64    
0      32     
80     -80    
-48    -80    
240    -16    
-80    -160   
-224   192    
16     -400   
-64    368    
176    96     
-192   192    
176    16     
48     -32    
192    -1008  
-32    48     
32     0      
80     192    
-80    -192   
-16    -80    
-128   32     
-32    -448   
16     176    
352    592    
-752   -496   
320    -416   
96     368    
-64    -320   
-224   -400   
224    -352   
-112   176    
-32    -336   
-48    -464   
-80    -64    
176    256    
-208   208    
-16    208    
-32    -304   
-64    -64    
64     -64    
112    -256   
-1568  16     
-400   -480   
112    -464   
96     -272   
-32    96     
288    -320   
-240   144    
80     32     
32     -64    
48     112    
16     -96    
-80    32     
240    -48    
-352   32     
128    -208   
-96    48     
80     -96    
32     64     
-112   -272   
160    -112   
-112   -1072  
-16    416    
-240   -48    
-64    0      
-128   -48    
-112   -352   
-304   -224   
32     -256   
-128   -160   
272    512    
96     496    
192    -256   
-64    416    
80     -48    
32     48     
16     -320   
144    -96    
-48    -96    
176    -176   
-64    80     
256    -48    
-144   64     
32     16     
112    32     
32     224    
-160   -112   
128    -80    
-32    176    
384    496    
-240   400    
544    176    
-816   -560   
400    0      
-96    1296   
-48    352    
-32    -368   
0      64     
80     -16    
16     112    
-80    -80    
48     176    
-64    -80    
-16    -48    
-144   -192   
64     112    
-32    64     
-304   -192   
-64    0      
-80    112    
-208   -256   
-864   -256   
-96    112    
400    128    
-224   96     
-496   -272   
96     80     
-176   80     
-32    144    
-112   -112   
-176   -96    
304    256    
-176   400    
128    416    
-64    288    
0      96     
-224   -144   
-112   -80    
-80    -96    
-32    48     
-208   16     
16     96     
-272   -416   
176    112    
-64    -64    
-256   16     
-64    48     
-32    -16    
288    304    
-80    112    
16     160    
-96    -160   
-176   288    
-784   240    
-400   -16    
64     -240   
160    16     
-80    -160   
-16    0      
-48    0      
176    240    
-80    128    
-464   -224   
16     64     
160    64     
-160   -272   
-64    -160   
144    48     
-368   0      
112    112    
-240   -80    
-32    -96    
-144   -64    
224    96     
-144   48     
-112   32     
80     64     
-32    48     
96     -16    
-112   -64    
-80    128    
-48    -112   
256    -160   
-272   -96    
128    -16    
-1088  0      
-64    224    
64     -48    
112    256    
128    176    
-448   -16    
-192   144    
288    -192   
-144   -80    
160    64     
-128   -48    
16     -144   
16     48     
-96    -32    
64     176    
-720   16     
272    48     
112    112    
-16    96     
-304   112    
-32    32     
16     48     
208    176    
-368   112    
-32    48     
-160   -32    
144    32     
-128   32     
-80    -80    
208    112    
-336   0      
16     144    
-16    128    
32     32     
80     0      
-144   64     
-112   64     
-224   -16    
64     16     
0      48     
-128   32     
32     -32    
-96    64     
-160   48     
-64    48     
-112   -112   
64     144    
144    16     
-144   32     
128    32     
0      48     
-32    16     
64     64     
-208   16     
144    112    
-96    -48    
-240   -96    
240    80     
-320   -48    
144    96     
-176   -48    
64     64     
64     0      
-320   -192   
256    -48    
-128   224    
352    560    
-208   -160   
-32    112    
128    0      
0      16     
-192   -32    
64     64     
0      16     
-128   0      
-96    -208   
128    0      
160    256    
-160   80     
-32    -16    
352    304    
-176   208    
-144   -96    
192    48     
-48    80     
128    32     
80     144    
-16    128    
-208   32     
128    176    
-32    32     
128    256    
-160   32     
-64    288    
80     80     
-64    -336   
144    32     
-48    80     
-224   112    
32     16     
0      32     
32     64     
-16    32     
-16    80     
-32    -144   
0      -16    
0      -32    
-48    112    
96     128    
-112   -80    
32     32     
80     112    
-144   -32    
-112   80     
112    -64    
128    48     
-32    64     
-48    32     
-64    -32    
-64    144    
-32    32     
64     64     
32     48     
-48    64     
192    112    
-224   -16    
112    16     
-160   48     
208    128    
48     80     
-144   32     
112    -128   
0      32     
-240   -352   
112    -368   
96     128    
-176   0      
304    -16    
352    560    
-400   272    
144    -32    
-176   64     
96     320    
112    336    
-304   -272   
176    176    
-16    240    
-48    128    
144    160    
0      -48    
80     -16    
16     -80    
128    -32    
144    -80    
128    96     
160    64     
80     -144   
208    48     
64     128    
-16    -288   
144    32     
-112   -192   
192    144    
-80    0      
-96    -544   
-80    -128   
-96    -688   
-160   -480   
112    -224   
-32    -16    
64     160    
64     176    
-80    -80    
112    64     
-32    -176   
-80    64     
176    272    
-16    80     
144    128    
-48    -96    
160    336    
-272   -880   
112    -384   
32     128    
96     96     
-288   -592   
240    -112   
64     112    
32     -64    
0      -32    
144    272    
-160   144    
-48    -400   
-160   96     
96     -208   
32     304    
-80    -176   
128    -96    
-16    208    
224    -16    
-160   -240   
400    528    
-464   -112   
400    272    
-288   416    
-64    -192   
-48    -64    
64     0      
-64    32     
-48    32     
48     96     
-64    -496   
80     -96    
-48    -1088  
176    240    
112    352    
-16    240    
-128   -320   
64     112    
32     176    
16     -336   
16     160    
48     144    
64     336    
-32    -128   
16     -16    
176    -416   
112    608    
-208   -240   
240    144    
-192   80     
16     -288   
0      96     
0      240    
320    144    
-256   -336   
192    96     
16     -336   
-16    48     
-32    -416   
-64    -176   
384    32     
16     336    
368    96     
-128   -144   
-32    496    
128    48     
-80    -160   
208    -144   
64     320    
96     304    
-144   -160   
-32    -672   
-48    -336   
64     -144   
192    624    
-32    288    
32     112    
-32    -320   
0      112    
80     96     
16     384    
352    144    
-64    -1504  
-48    -448   
304    592    
112    -1248  
-32    -160   
-96    0      
80     -112   
304    256    
-48    -160   
-256   80     
144    -80    
96     288    
-32    48     
80     64     
16     16     
-480   -128   
32     -528   
16     16     
160    32     
32     16     
-64    -480   
80     -512   
384    -240   
-80    1152   
-64    -32    
-64    -816   
304    384    
-80    352    
208    -480   
-48    400    
-672   -288   
176    64     
0      -432   
176    400    
-64    -64    
272    96     
-208   112    
128    32     
-208   -128   
96     64     
208    208    
-16    -176   
240    192    
64     -128   
112    -128   
112    144    
64     128    
-768   96     
-32    -1056  
384    96     
0      144    
-32    64     
0      -432   
-48    -384   
144    64     
160    512    
48     -304   
-112   0      
48     144    
304    -32    
-304   48     
-176   -240   
-16    368    
48     256    
224    16     
96     -64    
64     96     
208    -224   
-224   -640   
272    -2448  
-96    -224   
304    -16    
-48    48     
160    112    
-32    96     
0      128    
0      -64    
-80    80     
48     32     
-208   48     
112    -80    
-160   -64    
240    -32    
-32    -32    
208    32     
112    176    
192    272    
-48    224    
16     96     
-16    -144   
-64    -80    
-112   -240   
112    144    
16     -32    
-224   48     
128    -32    
-1040  -16    
-48    -448   
-16    -112   
208    48     
-80    -128   
320    -2112  
-208   -16    
288    -64    
-128   16     
-32    112    
0      -80    
-128   64     
48     -272   
-448   16     
32     -320   
-480   192    
384    -48    
-16    32     
256    -272   
96     64     
32     -1072  
-64    -272   
-16    160    
16     -80    
144    -160   
320    96     
-64    -48    
144    128    
-224   128    
80     80     
176    48     
80     192    
352    192    
-304   64     
240    320    
-144   272    
160    96     
48     16     
16     -32    
-176   -96    
208    -208   
-160   16     
176    -16    
80     96     
-96    -96    
-240   -32    
-128   -144   
0      144    
48     -208   
-16    64     
48     -144   
-224   32     
-64    80     
-992   -96    
-96    -80    
-48    96     
-96    -64    
256    128    
-176   48     
-48    -80    
-336   -112   
-1008  -272   
208    128    
-352   -80    
-128   112    
-256   32     
-192   0      
-160   64     
0      64     
-64    64     
-448   16     
-48    -16    
-160   -144   
128    16     
-480   160    
32     -96    
-160   32     
240    128    
-336   -96    
-304   -48    
128    96     
-256   32     
-32    48     
160    -48    
-208   32     
-400   -64    
-32    -32    
288    96     
208    48     
-144   -32    
272    224    
-400   -224   
288    112    
-176   48     
-80    -32    
128    64     
-128   0      
144    16     
-240   -48    
-96    32     
-128   -112   
-48    64     
-912   -16    
-160   -224   
48     -272   
0      256    
0      -176   
-64    32     
176    48     
0      48     
112    112    
112    96     
-304   48     
-64    80     
-352   -288   
96     -96    
32     112    
-256   -16    
64     -48    
-608   -112   
48     -32    
64     -96    
-176   32     
320    192    
-16    80     
0      64     
-80    0      
128    48     
-112   0      
-80    -144   
144    -208   
192    160    
-624   48     
16     112    
-1792  -80    
16     16     
64     0      
48     16     
-80    16     
-176   -16    
224    208    
-32    240    
-144   16     
-112   112    
32     48     
-160   -192   
-112   0      
48     592    
-16    80     
-208   112    
64     80     
-32    352    
-144   48     
176    240    
-176   176    
96     304    
16     352    
0      176    
-32    32     
48     144    
0      96     
-16    112    
64     96     
-144   64     
-112   -480   
-80    -176   
32     160    
-48    288    
-64    0      
80     16     
-32    48     
0      0      
32     240    
-48    64     
-128   -48    
-64    -624   
176    256    
-96    -144   
64     -560   
304    880    
-192   288    
16     -400   
192    688    
48     -816   
-32    192    
48     -16    
-64    64     
16     80     
-96    208    
-64    -176   
80     -224   
16     560    
-144   176    
-336   -528   
-176   -176   
-80    256    
112    -32    
64     240    
-80    -128   
272    400    
-208   -16    
272    -176   
80     368    
256    -112   
288    464    
-176   -160   
160    80     
-160   144    
32     48     
192    176    
-144   80     
32     80     
-48    -96    
-48    -48    
32     16     
0      160    
-32    96     
-64    80     
800    656    
-400   752    
-528   -688   
-64    -464   
-32    368    
-32    -32    
-80    -336   
80     -608   
192    64     
-176   576    
192    112    
16     48     
64     16     
-80    160    
-224   48     
16     -192   
208    160    
-64    -32    
80     320    
48     -288   
-80    -272   
160    -208   
144    -64    
-160   320    
192    464    
-224   96     
272    -592   
-256   336    
16     -128   
176    160    
-336   -64    
496    48     
-256   32     
144    192    
-64    560    
-16    -624   
176    496    
-240   112    
304    -400   
128    368    
96     160    
224    160    
80     144    
80     0      
-48    128    
304    -352   
-144   416    
64     -32    
144    128    
16     144    
0      -208   
96     48     
144    32     
-48    -288   
160    16     
80     224    
-64    32     
160    48     
0      -16    
80     160    
-96    448    
48     -320   
96     672    
-16    0      
-96    -1072  
448    -496   
128    832    
-208   -320   
128    96     
-16    240    
-80    160    
192    688    
-32    -384   
-144   0      
560    432    
-384   176    
112    304    
192    -272   
-144   128    
160    96     
-16    -304   
16     -224   
-48    -336   
144    288    
-64    96     
176    528    
-96    0      
80     128    
-128   -48    
-16    -288   
128    288    
96     112    
-304   32     
240    -64    
48     32     
0      -576   
64     112    
48     -656   
16     48     
-112   -32    
96     -320   
-48    -176   
112    176    
-64    16     
160    480    
-96    -560   
48     -320   
0      192    
96     -304   
32     80     
64     256    
-80    -160   
48     -624   
224    352    
-32    -1584  
176    -16    
-64    -160   
240    176    
-64    32     
-48    -48    
-16    0      
-128   -208   
16     80     
336    160    
-144   64     
64     48     
112    304    
128    -272   
-48    32     
16     -192   
48     80     
16     -656   
208    -80    
-64    80     
240    112    
96     160    
-80    -144   
0      80     
176    -224   
48     0      
32     -128   
96     80     
-80    -480   
-16    16     
272    144    
-240   128    
64     80     
128    96     
-80    64     
128    96     
16     32     
432    16     
-544   240    
112    -160   
-272   -256   
256    -368   
80     96     
-144   -224   
368    -128   
-80    -1120  
176    96     
-64    96     
128    272    
-64    96     
112    80     
64     128    
32     16     
32     144    
160    0      
96     128    
-16    0      
160    176    
-112   0      
128    224    
144    -576   
-208   0      
304    160    
-256   -672   
192    64     
-32    16     
-112   -352   
352    -160   
-112   -80    
272    -144   
32     64     
112    -192   
128    32     
80     -144   
144    16     
-160   -320   
144    -880   
-208   -128   
368    -240   
-80    240    
208    128    
-528   48     
224    80     
-112   -240   
-48    -112   
16     80     
-160   -240   
-48    -480   
-304   -112   
-96    256    
-272   48     
112    -48    
-304   -48    
-16    -48    
-128   -192   
-48    -80    
0      -320   
-240   -288   
352    -240   
32     64     
80     -528   
128    224    
-240   -752   
128    0      
32     -16    
160    64     
160    16     
-192   64     
64     -48    
176    -144   
32     -160   
48     48     
192    64     
-16    -80    
96     -64    
0      -400   
80     -32    
96     -320   
-112   0      
96     32     
-384   -160   
256    -176   
48     96     
-224   -48    
112    80     
-240   -224   
48     64     
-592   0      
-112   -176   
-688   -48    
48     16     
128    64     
-80    -96    
64     48     
-16    -944   
-144   96     
144    -112   
80     144    
-288   -240   
448    -192   
-176   96     
192    -112   
-320   0      
144    -32    
16     48     
-16    128    
-176   -32    
0      -272   
96     -16    
48     -496   
16     -64    
160    112    
96     96     
32     -16    
128    -80    
-96    -160   
-80    -48    
112    80     
-112   16     
-464   0      
96     -144   
-1952  -96    
224    -144   
-80    48     
64     -464   
80     96     
48     -1392  
80     -160   
-96    96     
272    -16    
-176   -16    
-32    64     
16     32     
-112   16     
80     -16    
112    -176   
-480   -128   
112    -192   
0      160    
176    -112   
80     176    
-32    -688   
96     288    
64     176    
-160   32     
256    -160   
-144   -16    
-208   -96    
128    -144   
-112   208    
192    272    
-112   224    
80     16     
32     144    
-32    -464   
192    336    
-112   352    
-64    0      
-96    -80    
160    -64    
-160   -80    
-64    -192   
-48    208    
32     -32    
-64    -80    
96     96     
-144   160    
-1856  -656   
-48    144    
-1248  -256   
64     -784   
112    512    
-336   -608   
176    32     
-96    -112   
48     208    
208    480    
-192   -368   
80     -208   
-112   64     
-512   -112   
-80    -80    
-640   -32    
-96    96     
-272   -64    
-64    112    
-176   -48    
-432   -64    
-80    -256   
-384   -112   
64     144    
-432   64     
64     32     
0      -48    
-64    48     
-80    -112   
64     -16    
-288   -560   
224    128    
-32    208    
-144   0      
16     48     
-336   32     
32     32     
-112   0      
-144   160    
-416   -352   
-272   32     
-1152  64     
-208   48     
48     -96    
-16    80     
-64    -32    
688    544    
-384   528    
16     208    
-128   176    
16     416    
448    384    
-176   336    
-112   0      
-240   -32    
-112   112    
-288   32     
-144   208    
192    -176   
-160   96     
112    -32    
-48    144    
112    144    
32     272    
320    192    
-272   0      
160    0      
-176   96     
112    -128   
112    -16    
-144   272    
-576   -320   
-112   -272   
-144   -240   
16     -192   
-144   96     
112    288    
-96    -32    
-272   -16    
-144   -368   
-64    -128   
-240   384    
16     -16    
224    320    
-320   -48    
64     64     
-592   -368   
336    32     
-1536  -128   
80     64     
160    64     
0      -32    
96     368    
64     -240   
192    208    
0      -176   
16     112    
-32    160    
-224   -352   
32     -256   
48     96     
128    592    
-256   208    
-416   -272   
240    304    
-16    16     
16     192    
64     -304   
16     64     
96     -192   
-48    1056   
-64    -1376  
-112   -400   
288    656    
-336   -48    
32     -400   
16     160    
48     288    
-416   -48    
-272   -352   
320    32     
-112   288    
64     816    
16     -16    
-208   -320   
160    288    
-16    880    
64     80     
16     -432   
-64    64     
192    416    
-144   304    
80     160    
-192   -128   
-128   0      
0      -16    
-256   48     
112    -144   
-96    192    
0      -112   
-32    -512   
112    80     
0      368    
32     336    
48     64     
-48    -80    
-176   -16    
80     496    
16     288    
-80    208    
16     192    
32     128    
-32    -128   
-64    112    
160    128    
-256   16     
48     96     
80     64     
-32    80     
-64    -288   
0      16     
32     -48    
-48    32     
208    80     
-112   -64    
32     224    
208    160    
-112   160    
32     320    
112    240    
-176   -128   
160    -64    
80     256    
-192   112    
-320   -224   
48     -240   
0      -64    
80     32     
96     176    
-64    272    
144    144    
32     80     
80     16     
0      32     
144    48     
48     192    
112    368    
0      80     
-48    -48    
48     48     
304    320    
-304   96     
32     64     
160    96     
16     0      
-16    160    
0      96     
80     512    
112    160    
-112   -16    
208    -176   
160    192    
-208   16     
16     80     
112    -16    
64     16     
80     160    
-64    -64    
96     16     
0      144    
0      144    
32     80     
96     64     
64     32     
-16    96     
32     80     
0      96     
208    -32    
-112   48     
-32    -208   
-48    -16    
160    64     
16     -272   
32     48     
64     112    
128    16     
-16    80     
32     -32    
-16    64     
160    256    
0      176    
160    -48    
-32    -112   
48     32     
-80    -112   
160    -288   
160    224    
80     -16    
112    176    
-96    64     
96     48     
80     336    
176    288    
-224   0      
208    64     
128    144    
-320   -16    
64     -192   
-112   -112   
320    192    
-448   -80    
336    64     
-288   -48    
144    80     
-192   -128   
288    208    
-160   80     
-80    32     
240    176    
128    208    
-64    -560   
-64    128    
48     32     
-96    -32    
64     32     
16     -128   
160    80     
160    -112   
-320   48     
32     -832   
288    48     
80     224    
48     -32    
-48    -96    
320    272    
-272   -80    
-16    128    
80     -16    
144    144    
-48    48     
-128   -32    
272    128    
-112   -64    
32     16     
144    -160   
128    208    
-144   -480   
32     192    
240    128    
-32    48     
144    128    
80     48     
16     16     
-16    -144   
32     -32    
-32    -96    
0      80     
-48    -128   
208    64     
-16    -224   
0      176    
-16    -672   
-64    64     
96     64     
80     96     
-48    0      
48     -16    
-16    -48    
80     -160   
16     112    
0      128    
320    128    
-192   -80    
160    80     
16     -112   
-112   -144   
176    -256   
-16    112    
-144   -32    
0      64     
176    16     
16     96     
0      64     
32     -32    
-16    16     
224    -192   
32     112    
96     -128   
-16    48     
144    -240   
-16    64     
48     80     
64     64     
0      64     
-32    -64    
128    128    
-176   96     
48     -112   
128    0      
0      -128   
-144   -176   
224    144    
160    64     
-48    256    
-64    0      
240    112    
-160   -176   
16     -1968  
-32    -16    
48     -1808  
48     160    
-240   0      
96     -96    
32     -160   
80     -1024  
32     -64    
112    -112   
352    688    
-144   352    
16     -144   
288    -928   
-48    192    
16     -704   
80     48     
144    144    
-64    64     
-160   -32    
32     -288   
16     -64    
96     -160   
48     -16    
48     48     
64     16     
96     -400   
-320   -1184  
240    400    
112    768    
-352   -800   
208    288    
16     -192   
-16    48     
-608   -64    
64     -224   
-704   -32    
128    -256   
272    256    
-80    -512   
256    -192   
-160   -800   
240    -416   
48     96     
32     144    
112    -272   
16     96     
48     -160   
80     0      
-112   0      
112    0      
-560   -240   
272    -96    
16     432    
0      -112   
32     64     
48     80     
-144   -208   
16     32     
-128   -336   
-16    -80    
-128   160    
-16    32     
224    240    
-192   416    
144    112    
-96    -16    
80     -208   
-464   -48    
224    -64    
-368   0      
272    16     
-80    48     
224    -1040  
-208   48     
192    -32    
-96    64     
32     80     
16     -64    
-224   -80    
32     -320   
-96    -192   
48     -208   
-448   -176   
-32    -208   
80     80     
96     -272   
-208   -32    
208    -416   
-32    432    
-16    368    
528    224    
-320   32     
176    -224   
-208   -208   
48     -176   
-240   -80    
-224   -144   
-384   -112   
0      -16    
-16    -80    
-32    -48    
32     96     
-144   -304   
-112   240    
176    -608   
0      -16    
-272   -336   
112    -96    
-320   16     
80     -304   
-64    432    
64     320    
-160   -208   
-16    -288   
96     64     
-64    -80    
96     176    
-32    -224   
16     -16    
-304   0      
416    -80    
-432   -112   
384    48     
-80    64     
48     112    
-160   32     
176    -32    
-336   -608   
48     256    
-160   736    
64     -112   
96     144    
-64    -32    
16     -96    
-32    0      
-32    -32    
528    624    
-288   -224   
144    -192   
-32    -48    
-144   -208   
80     -400   
-304   -272   
368    -16    
336    528    
-704   -160   
240    16     
-880   -688   
-1200  -688   
128    -224   
-512   -64    
0      112    
-912   192    
272    224    
-208   304    
-256   -128   
160    48     
32     -48    
48     -144   
352    496    
160    240    
-32    400    
-144   48     
-304   -64    
32     -48    
-352   208    
144    96     
-688   -144   
32     80     
-992   -16    
-80    64     
-144   -32    
-16    96     
-416   -256   
-64    192    
-48    -80    
-16    -32    
-32    -96    
-80    -288   
-176   -16    
96     128    
-128   144    
-32    0      
32     16     
-272   -128   
-144   -112   
-544   48     
208    48     
-144   -192   
-16    -48    
48     -32    
48     16     
-32    16     
-96    0      
-48    64     
16     128    
-64    128    
-64    96     
128    112    
-400   -64    
-16    32     
-1168  -32    
112    80     
-48    -112   
-16    64     
64     -176   
-176   -32    
112    0      
-64    16     
64     32     
-256   -64    
272    32     
-96    80     
-224   -48    
-32    0      
-64    32     
-496   144    
-64    -64    
-144   -32    
464    496    
-544   -48    
112    80     
-176   96     
-32    32     
-16    144    
-64    -32    
48     64     
-32    128    
112    -16    
-128   64     
128    96     
-256   -48    
64     80     
-1120  144    
112    160    
-32    64     
80     96     
-16    112    
-208   16     
176    128    
-160   -32    
-32    112    
176    96     
-16    64     
-80    80     
-80    -96    
-16    -176   
80     160    
-624   176    
-48    -48    
64     48     
-32    16     
16     32     
16     32     
-64    0      
96     32     
-16    48     
160    16     
112    160    
-256   -112   
256    256    
-320   -64    
64     144    
-304   -16    
-176   48     
80     -16    
-32    64     
-64    32     
144    240    
32     128    
-176   32     
352    48     
-176   16     
144    -48    
-240   112    
240    208    
-160   80     
160    80     
16     32     
-80    -32    
16     -240   
-32    32     
176    176    
-64    64     
64     48     
-48    96     
-48    64     
-128   32     
32     -96    
-96    80     
32     112    
-128   -32    
144    32     
-64    144    
16     -48    
-32    48     
160    128    
-96    48     
128    96     
48     0      
96     -32    
32     144    
64     80     
0      32     
64     208    
-80    288    
-272   16     
128    160    
80     176    
64     -48    
-192   128    
144    64     
-160   48     
48     48     
80     144    
-176   112    
80     112    
-64    0      
-96    96     
192    -112   
-16    112    
32     80     
-16    32     
-32    -32    
368    128    
-16    224    
-48    0      
272    176    
0      192    
-48    -80    
-64    144    
96     16     
-112   -64    
112    128    
96     160    
-96    80     
32     16     
272    -64    
-32    32     
80     112    
0      32     
64     64     
-48    64     
-96    -48    
192    80     
-96    80     
96     96     
0      -32    
384    320    
-416   32     
32     96     
144    112    
160    112    
-32    80     
256    16     
-144   192    
240    304    
-288   224    
0      112    
0      -48    
-160   -256   
496    112    
0      80     
208    80     
-384   -48    
416    -384   
-32    112    
-80    0      
16     80     
160    48     
128    160    
-112   96     
160    144    
-48    96     
64     192    
-80    112    
208    -80    
-160   80     
32     -32    
-208   -80    
192    -208   
32     128    
48     -144   
96     160    
304    176    
-96    160    
32     288    
-32    64     
96     240    
384    480    
-176   16     
-64    -448   
-128   112    
304    560    
-208   -240   
224    160    
96     176    
-80    -176   
64     -256   
32     512    
96     48     
-48    112    
128    112    
-16    -48    
256    128    
-304   -144   
464    256    
-496   -384   
176    -368   
144    592    
112    48     
-256   -416   
352    160    
96     96     
-272   -480   
224    80     
16     240    
48     96     
96     32     
16     48     
0      0      
48     112    
32     64     
80     -112   
80     224    
0      -112   
-128   80     
-96    -256   
128    112    
32     -176   
32     128    
-32    16     
-80    -112   
176    -208   
0      96     
0      0      
224    192    
16     -144   
144    -224   
80     80     
160    -80    
-64    128    
48     -336   
16     96     
80     -96    
32     144    
-32    -1264  
48     192    
-176   64     
112    224    
16     144    
96     96     
48     64     
-64    -400   
208    -192   
48     96     
176    480    
-48    464    
176    96     
-96    -64    
432    432    
-128   -112   
192    0      
32     48     
96     96     
48     0      
144    32     
-32    -64    
112    -208   
112    192    
144    -160   
16     160    
0      -160   
48     80     
-32    -224   
-80    -160   
-80    -576   
16     -304   
0      112    
144    -1040  
-96    16     
352    -16    
-80    -288   
64     -144   
112    -208   
0      -176   
-64    128    
464    576    
-272   368    
144    -384   
112    -128   
80     -112   
48     -144   
224    400    
-128   -896   
-48    -112   
-368   288    
96     -688   
0      -240   
80     -752   
-64    -96    
240    -672   
-256   -240   
160    432    
144    -400   
-80    112    
176    112    
32     -112   
32     864    
160    -560   
-32    -464   
112    320    
16     -368   
96     -400   
80     -32    
320    432    
208    176    
0      -240   
32     -1232  
80     -96    
-32    -400   
32     48     
176    16     
-64    -16    
16     -64    
128    -32    
-480   368    
192    192    
128    128    
-32    96     
-16    -80    
208    0      
-208   -160   
320    -240   
-240   -80    
160    -48    
32     160    
-64    -192   
192    -112   
-48    48     
176    -112   
160    64     
-128   144    
0      0      
16     -80    
192    64     
256    -176   
-208   -208   
192    -496   
288    96     
112    288    
64     16     
-64    -64    
208    32     
-16    16     
144    -32    
288    256    
-288   208    
-208   -32    
-80    80     
-288   -80    
-48    -112   
-288   -96    
224    -208   
32     96     
-16    -1584  
-64    64     
128    -112   
-32    16     
-64    80     
0      128    
-64    48     
-96    -112   
-176   80     
48     -32    
-528   48     
16     176    
48     0      
16     -224   
96     112    
80     -224   
256    144    
-96    48     
-96    112    
-96    -64    
128    48     
144    0      
-304   -96    
-144   48     
96     0      
-16    48     
-32    -32    
-304   -32    
-128   -304   
80     160    
80     -240   
-16    0      
-112   64     
144    -64    
-48    16     
-80    -64    
-176   0      
48     -64    
-80    16     
128    -32    
-320   -48    
16     -208   
32     -240   
-16    -16    
256    160    
32     -320   
128    32     
-144   16     
-48    -112   
-352   -128   
192    -128   
-320   128    
400    80     
-208   -64    
192    -64    
-224   -96    
16     -48    
320    192    
48     -112   
192    32     
-960   -320   
-1568  16     
32     -192   
-16    80     
96     144    
32     48     
-80    -16    
208    -96    
-128   96     
112    -32    
256    384    
-448   96     
96     192    
-304   -208   
48     112    
-176   -176   
-224   0      
-96    -224   
-80    -32    
16     64     
-976   -160   
-16    112    
0      16     
-144   80     
224    32     
-208   96     
-352   -80    
64     240    
-256   -352   
-240   144    
176    -176   
-192   -16    
32     144    
112    96     
-160   -16    
-64    48     
-128   64     
-608   48     
96     224    
80     -64    
0      -96    
-480   -224   
416    96     
-240   -16    
224    192    
-48    64     
-112   16     
64     80     
-64    -32    
176    16     
-272   160    
-32    -80    
-256   48     
-112   16     
-1008  -80    
-48    -16    
16     -96    
112    160    
-16    0      
64     -112   
-144   -176   
-32    96     
32     48     
-192   -32    
64     32     
48     64     
-48    0      
-528   -96    
-80    -16    
-1472  -96    
-128   -32    
160    -144   
-112   96     
16     -176   
-112   64     
80     64     
-16    16     
-144   0      
80     80     
16     112    
-112   64     
-96    -16    
-160   -80    
96     128    
-288   -16    
64     48     
-96    32     
80     48     
32     144    
16     -112   
-176   -208   
96     -384   
-160   -16    
304    176    
-112   80     
-176   -96    
0      -128   
80     96     
224    32     
-256   64     
80     16     
-1984  -96    
320    144    
-416   -160   
112    -48    
192    208    
80     80     
-240   -96    
96     -16    
64     48     
-256   -16    
128    0      
-32    -32    
176    160    
-368   -128   
-112   -96    
-544   -96    
80     64     
0      144    
-64    -16    
448    464    
-400   448    
-48    288    
-80    128    
48     112    
-16    80     
0      208    
16     160    
32     160    
-96    128    
-96    192    
144    256    
-272   144    
-32    16     
-64    -16    
-32    64     
-128   -96    
64     96     
208    80     
208    64     
-48    64     
16     48     
-96    -32    
96     112    
-80    256    
32     0      
-224   -192   
192    272    
-64    -96    
-400   -960   
224    240    
-112   176    
128    144    
-112   0      
-208   -256   
160    0      
-320   -64    
80     -80    
-112   176    
128    224    
-144   112    
128    64     
0      272    
-48    -64    
-48    64     
96     16     
-96    352    
240    -320   
-112   -128   
0      288    
144    -256   
16     288    
0      144    
112    -48    
-128   48     
48     416    
144    192    
-48    192    
160    112    
-32    160    
48     464    
16     592    
48     96     
-128   80     
144    160    
-144   0      
128    112    
-192   -48    
-32    96     
96     0      
-64    80     
80     80     
32     64     
0      48     
32     112    
-144   -16    
80     32     
32     -272   
-16    -80    
-96    64     
48     64     
-208   32     
64     -160   
32     64     
48     64     
288    240    
-48    480    
144    352    
-208   32     
592    160    
-288   80     
80     96     
128    96     
0      -16    
-16    96     
16     64     
16     96     
16     144    
-48    -352   
80     176    
16     176    
-48    64     
-48    128    
-16    112    
96     112    
48     128    
80     -32    
-64    -16    
192    224    
-240   -352   
-240   -720   
64     -368   
-192   -400   
-80    -544   
128    240    
16     -416   
32     144    
0      160    
48     -160   
64     -208   
96     64     
96     80     
80     48     
-48    16     
80     96     
-32    64     
48     96     
-48    64     
-160   -800   
144    -160   
704    688    
-480   224    
16     -624   
432    336    
-288   160    
96     -336   
64     448    
80     -112   
-384   -704   
272    208    
-144   80     
64     192    
16     80     
208    368    
32     96     
-48    -160   
96     160    
0      0      
-144   -400   
48     -352   
128    144    
-32    -16    
-16    32     
16     -112   
-96    -336   
-80    -320   
192    160    
192    336    
64     96     
96     128    
-128   -64    
384    336    
-112   -928   
240    -96    
16     -80    
144    -32    
-48    -80    
272    416    
-192   -64    
-160   608    
384    288    
-240   -32    
160    0      
-32    -208   
288    -16    
48     -112   
112    16     
128    144    
-256   -208   
528    -384   
-80    208    
208    0      
-192   64     
192    32     
-16    144    
16     112    
-272   16     
544    32     
-96    64     
272    -80    
-96    -176   
256    112    
-112   -16    
48     0      
80     -128   
224    160    
-448   16     
304    96     
-96    160    
224    -80    
-80    176    
320    272    
-144   32     
176    -128   
16     80     
336    224    
-128   224    
80     -528   
48     64     
80     -176   
-208   144    
112    80     
-32    96     
-16    -128   
-272   -272   
208    80     
48     -48    
-112   32     
128    -16    
64     80     
16     -240   
0      96     
64     -128   
-16    96     
96     -208   
0      16     
144    144    
80     -352   
-16    -96    
176    -80    
48     -1456  
272    48     
-96    -1216  
272    32     
-224   96     
112    32     
192    192    
0      96     
-16    -240   
32     0      
-16    -528   
112    144    
16     -96    
-48    16     
-608   -112   
-160   -176   
144    80     
112    -352   
0      -144   
-32    -416   
176    -80    
144    32     
32     -32    
48     -112   
0      96     
-32    -432   
-64    80     
80     -96    
16     192    
-304   -80    
-48    -144   
112    -80    
128    -192   
96     0      
144    16     
0      -80    
-80    -800   
-176   -320   
320    -256   
-64    -32    
112    48     
128    80     
-32    -48    
224    112    
192    288    
-480   -160   
240    80     
112    -160   
-160   -32    
32     -96    
144    -32    
0      -1600  
-160   -80    
208    96     
-48    16     
-48    32     
160    -64    
-224   0      
112    -176   
-16    16     
224    -64    
-144   -16    
48     -192   
176    0      
112    64     
32     -48    
64     -384   
48     32     
112    32     
-144   64     
-16    -128   
112    -16    
-256   -144   
32     48     
0      -32    
64     32     
-400   -64    
224    -128   
-64    112    
64     -96    
-160   16     
288    -48    
-128   96     
96     -768   
48     80     
48     -64    
224    -48    
16     -80    
144    32     
-144   32     
160    -112   
-352   -176   
0      -208   
-64    96     
-64    32     
192    96     
96     -272   
-272   144    
160    -352   
-16    64     
0      0      
208    272    
-288   48     
160    -128   
-112   -192   
16     -80    
-368   -32    
128    -80    
-64    -80    
-16    -160   
128    48     
16     -320   
-48    64     
64     -480   
32     112    
-224   64     
144    32     
-288   -16    
192    112    
-320   32     
-32    -352   
-272   -528   
352    80     
-192   0      
-64    -336   
-32    112    
0      -112   
-96    -32    
80     -192   
48     -80    
160    48     
64     -32    
-176   80     
-16    -112   
96     96     
192    144    
-272   64     
528    640    
-304   896    
-16    240    
-144   32     
0      -16    
-80    -160   
-192   -224   
-1024  -208   
-128   64     
-80    384    
64     224    
224    448    
-416   400    
80     48     
-432   16     
16     -400   
64     -32    
-608   -480   
-192   -208   
32     -208   
-32    0      
-128   48     
-240   64     
-96    64     
224    80     
-272   -48    
-448   -112   
-176   96     
288    32     
-80    128    
80     96     
-160   96     
-16    32     
-176   -16    
-128   -192   
128    512    
96     -144   
-208   -384   
208    672    
-240   -128   
-192   -432   
-256   304    
-272   176    
-800   -176   
48     176    
96     -16    
160    144    
-144   -336   
64     -96    
160    160    
-80    0      
-32    0      
-176   208    
16     -224   
-128   304    
32     336    
-32    -208   
-48    32     
-64    16     
80     32     
-304   -80    
160    144    
-32    -96    
-32    80     
96     64     
-112   -32    
144    80     
-160   16     
272    224    
-128   720    
-160   -320   
224    -272   
-240   64     
-48    -192   
-128   144    
-352   -32    
304    336    
-320   368    
144    128    
208    304    
16     16     
0      112    
-128   16     
-80    -80    
-16    -208   
-80    64     
-96    -176   
32     0      
0      -128   
0      192    
-320   176    
-32    112    
-96    -224   
400    80     
-256   32     
-16    -16    
32     80     
-32    -32    
16     64     
-96    32     
-16    48     
-208   -48    
-16    32     
-80    16     
0      48     
16     -32    
-320   112    
-1312  -112   
-272   288    
-64    -368   
-112   -352   
128    128    
-16    128    
64     208    
-16    512    
-96    192    
-240   -80    
16     -176   
-272   -80    
144    384    
-160   -112   
-64    16     
-1008  -80    
-96    144    
-16    -32    
-112   -256   
64     176    
-128   -128   
144    192    
-16    352    
64     -144   
-32    720    
-64    -256   
-128   0      
0      64     
-240   -416   
48     -96    
256    304    
48     960    
208    400    
64     -688   
-32    352    
-144   64     
128    -160   
-48    192    
304    192    
-256   160    
64     96     
-256   432    
256    -224   
-144   128    
-48    96     
-16    -32    
-32    112    
0      144    
-48    176    
96     -64    
-64    -96    
80     208    
-80    112    
48     -592   
-32    -384   
-64    -192   
-112   -256   
304    400    
-64    224    
-16    96     
288    96     
208    -16    
-16    16     
48     -80    
144    128    
-64    64     
-48    48     
-208   -112   
128    80     
-64    176    
-112   -160   
384    80     
-272   160    
80     -352   
-96    -112   
192    -48    
-80    -192   
128    112    
-32    176    
176    320    
-176   128    
32     -112   
144    96     
-160   144    
16     -160   
-96    -160   
48     -96    
96     176    
-48    128    
-16    32     
160    96     
0      192    
112    144    
-128   64     
144    192    
-48    80     
16     64     
-48    32     
48     -48    
-96    48     
-16    128    
-96    208    
32     112    
80     80     
48     112    
48     48     
-112   48     
32     -16    
-32    -96    
304    160    
-112   160    
0      208    
-112   192    
176    224    
-112   -112   
176    208    
-224   -128   
-64    -80    
192    176    
-256   64     
48     16     
304    512    
-560   128    
-128   64     
128    16     
80     48     
80     64     
16     -48    
0      160    
-64    -128   
32     96     
-16    16     
112    -112   
176    16     
0      -1536  
160    32     
-112   16     
368    -32    
-192   0      
224    96     
16     32     
-64    64     
-32    -16    
-96    48     
176    48     
-48    80     
192    128    
32     -224   
96     128    
240    -96    
176    304    
-256   96     
112    0      
-16    128    
256    96     
-96    -16    
192    80     
-16    -16    
112    64     
-80    80     
48     48     
80     112    
16     -96    
32     112    
32     80     
-48    112    
-32    -176   
0      112    
80     -112   
-144   -16    
32     -240   
48     -80    
16     176    
288    0      
-176   16     
48     -144   
64     48     
144    -80    
0      32     
-32    -416   
160    320    
112    -992   
-128   16     
112    -64    
208    160    
-80    -16    
-16    96     
80     32     
112    112    
288    208    
-352   -16    
80     48     
80     -48    
96     112    
-48    -160   
240    288    
-304   -96    
176    192    
80     -304   
-112   48     
160    112    
192    144    
-80    -16    
160    112    
176    96     
-80    -112   
64     128    
16     -240   
16     64     
0      -32    
-48    32     
32     -256   
64     96     
-32    0      
32     144    
-16    48     
32     96     
96     -16    
128    128    
16     -48    
80     -288   
112    96     
64     -48    
16     80     
48     -32    
128    112    
80     -304   
-96    144    
0      -368   
160    192    
-48    -48    
128    64     
-16    0      
160    -48    
48     16     
96     16     
-48    208    
144    240    
-208   80     
288    32     
80     48     
-112   -144   
240    -80    
384    272    
-160   -464   
160    64     
-32    -1200  
48     208    
-96    80     
224    -304   
-160   0      
64     -608   
64     -48    
48     -48    
64     -144   
0      144    
80     176    
112    112    
-32    112    
80     -368   
-96    560    
352    -352   
0      0      
-1104  -144   
96     -64    
32     -112   
80     -336   
224    -144   
32     80     
-16    -80    
176    160    
-80    -416   
128    608    
208    32     
-112   -384   
288    480    
-160   -352   
224    128    
-288   -96    
176    -480   
240    192    
96     -16    
96     -176   
160    -192   
112    80     
-16    -368   
16     -288   
176    -112   
48     160    
96     -80    
16     352    
0      80     
-96    -208   
-32    64     
80     32     
16     336    
176    -288   
-320   -352   
336    64     
-80    160    
64     -1248  
-208   -176   
48     -64    
48     -48    
48     64     
144    -16    
-352   -96    
64     48     
-32    32     
-32    -16    
-640   -208   
240    -96    
240    208    
-128   -192   
-64    -112   
-176   -912   
32     112    
208    336    
-48    320    
32     -144   
-240   -304   
224    -32    
16     112    
-160   -80    
160    144    
96     0      
80     -80    
-512   48     
48     -640   
16     -560   
416    800    
-368   48     
448    -1840  
-64    512    
304    -80    
-160   -176   
96     -384   
176    448    
-112   240    
-112   -544   
-160   -272   
144    192    
-640   432    
400    -464   
-224   288    
112    -128   
-32    -112   
96     -768   
-80    -176   
368    176    
-144   -16    
48     96     
224    -32    
-368   0      
80     -16    
-144   208    
16     208    
-176   128    
208    -192   
-80    -320   
176    192    
-16    160    
-16    -224   
272    288    
-512   96     
32     -192   
-272   -320   
288    512    
-16    -64    
-128   -624   
224    -48    
-144   272    
192    -80    
32     -160   
112    368    
-80    -704   
208    592    
-80    464    
560    240    
-704   -560   
-128   -1152  
112    0      
96     672    
-240   272    
368    0      
-80    144    
64     -144   
-528   -64    
96     -288   
-96    144    
-496   -128   
0      128    
-272   -80    
-160   -48    
-64    48     
-1344  160    
480    64     
-352   112    
-48    -144   
-48    192    
-64    96     
-16    -176   
80     -80    
-160   -16    
144    -80    
-272   64     
144    384    
-16    -144   
-224   -16    
64     -240   
-112   0      
16     176    
-224   -48    
48     -64    
-912   -16    
176    400    
-144   -112   
-80    -144   
-16    -96    
16     96     
-320   -816   
-112   -16    
48     -16    
-144   144    
128    480    
-160   288    
-112   -288   
-64    -96    
-256   -112   
-592   -384   
-80    -144   
96     -160   
-48    128    
0      -240   
48     96     
-64    -304   
160    64     
-176   80     
128    -208   
-304   -224   
112    -32    
-224   112    
16     80     
32     64     
-48    160    
208    192    
-272   -160   
176    144    
-16    32     
112    112    
112    -48    
16     16     
128    -64    
-112   -160   
16     -16    
32     64     
-80    160    
160    208    
-288   192    
-416   -128   
144    -80    
-992   -48    
64     80     
-160   -32    
208    0      
-64    -112   
80     -80    
32     80     
-208   -208   
368    80     
-240   112    
128    0      
-208   64     
-48    -16    
-208   -80    
-48    64     
-368   96     
-80    32     
-32    80     
48     16     
64     80     
-272   112    
48     -32    
16     80     
112    96     
0      80     
-32    -16    
32     32     
160    48     
-272   320    
352    -16    
32     64     
16     -32    
-944   -208   
32     80     
128    64     
80     64     
176    240    
-96    16     
-80    -144   
112    -32    
144    112    
-16    208    
-64    32     
-192   80     
352    384    
-288   352    
144    208    
-192   -32    
-208   -32    
96     0      
64     -16    
48     16     
-32    112    
-160   -64    
128    80     
-304   32     
-96    48     
96     -48    
-352   -176   
112    -48    
-304   -128   
304    128    
-64    32     
112    16     
-64    160    
48     144    
-192   -48    
96     96     
48     48     
-64    112    
-80    96     
-32    0      
32     96     
112    -80    
-240   96     
16     176    
-192   32     
0      -112   
80     64     
16     80     
-176   16     
128    128    
-32    48     
0      160    
16     48     
-64    32     
-16    176    
-272   144    
-112   -96    
0      80     
16     64     
-32    16     
128    32     
96     -144   
-240   -144   
192    48     
-64    160    
-64    16     
-48    32     
48     48     
32     80     
-64    32     
176    80     
-48    -224   
-96    -80    
112    48     
16     -144   
0      -144   
80     240    
288    80     
-16    16     
48     96     
32     64     
96     128    
0      128    
80     112    
48     64     
48     -64    
-144   -80    
160    160    
32     160    
-16    80     
0      112    
80     240    
144    208    
176    176    
-64    160    
96     64     
-96    64     
96     0      
96     128    
48     64     
-96    48     
-32    272    
144    -416   
-32    -64    
16     32     
160    176    
48     160    
32     96     
-144   -48    
48     -32    
-144   -96    
144    -48    
-64    -64    
-48    16     
-128   -16    
128    112    
-48    208    
144    -32    
-272   48     
112    112    
192    -48    
128    112    
80     0      
256    272    
-32    384    
128    192    
-32    160    
-16    64     
96     176    
-64    -64    
80     160    
-16    128    
128    -448   
-16    -208   
160    -912   
48     320    
112    480    
16     160    
16     0      
80     -16    
-16    64     
288    320    
-240   176    
0      -208   
-16    80     
400    400    
-160   560    
64     -432   
112    -80    
-64    -400   
368    160    
-144   96     
352    -112   
-160   -32    
-128   -16    
80     -288   
16     304    
176    -16    
0      272    
16     -96    
64     -112   
112    -16    
-272   -496   
544    80     
-128   -128   
0      64     
-16    -1952  
144    -32    
0      80     
-96    -144   
-16    176    
384    448    
0      528    
304    464    
-384   48     
-48    -464   
224    64     
64     304    
0      32     
32     -192   
-336   352    
352    -976   
-80    192    
112    -240   
-32    -128   
-80    16     
96     112    
-224   -128   
16     -64    
-192   -128   
80     64     
16     208    
400    -16    
-384   -256   
32     -480   
192    544    
-80    -608   
-16    -64    
240    -576   
64     224    
-176   128    
336    64     
80     432    
192    400    
-16    16     
-96    -320   
112    -112   
80     -496   
112    112    
-192   -400   
192    48     
48     -48    
128    112    
-384   -272   
448    -384   
-128   688    
224    -160   
-112   112    
64     96     
0      -80    
-224   -192   
176    -80    
272    320    
-320   -80    
80     64     
192    192    
0      -112   
-112   384    
-48    -416   
16     -224   
192    1264   
96     640    
-320   -704   
-32    -416   
0      -1392  
0      160    
32     32     
-112   -352   
64     544    
-16    -368   
32     432    
-144   -352   
80     816    
-48    -320   
96     976    
0      -528   
-64    -640   
-16    -128   
336    176    
-352   -784   
336    -80    
48     512    
352    48     
-176   64     
0      -224   
-16    32     
96     -112   
96     -384   
32     80     
560    16     
-352   112    
160    -800   
48     -128   
-400   -32    
32     -528   
176    592    
0      -640   
96     240    
-48    32     
304    -32    
-160   -48    
16     -16    
384    -128   
-80    512    
160    -336   
-64    -48    
80     -64    
0      0      
-112   112    
-96    -640   
224    496    
96     -16    
-160   -608   
96     -208   
304    176    
-80    288    
112    64     
160    -32    
-160   256    
304    -80    
-144   64     
80     -32    
48     16     
-528   -80    
64     -48    
240    -96    
144    80     
-144   -128   
128    -384   
48     -240   
96     -400   
-176   64     
336    128    
48     272    
288    224    
-80    -48    
48     32     
-128   -304   
-112   -224   
160    -208   
80     48     
128    96     
-240   -688   
192    -448   
-176   -32    
-128   -592   
16     0      
176    -192   
96     192    
32     32     
64     48     
-128   -96    
-112   -96    
-64    -48    
144    -128   
-160   64     
16     -192   
-1472  -48    
224    -80    
-160   -16    
128    -160   
80     80     
96     192    
-48    336    
16     -48    
-48    -112   
80     48     
-160   -48    
64     -48    
-144   -192   
96     48     
-64    -80    
384    304    
-272   48     
0      -16    
128    -144   
192    96     
-64    -208   
16     64     
0      0      
112    -64    
-592   96     
32     64     
-624   32     
144    -96    
-80    96     
0      48     
0      96     
-48    0      
96     64     
32     -192   
48     -16    
176    -352   
96     0      
-192   32     
160    128    
96     -32    
-48    -32    
-176   -96    
64     -224   
0      64     
0      -96    
112    96     
-208   -416   
112    32     
64     -272   
0      96     
-16    -448   
-176   48     
-48    -272   
-624   -304   
-16    -48    
16     32     
224    256    
-464   112    
272    96     
-32    32     
-80    -48    
-368   -96    
-96    -16    
-64    -112   
32     64     
208    272    
-832   -128   
-192   -48    
-384   -112   
-128   -48    
64     32     
-144   96     
-48    0      
-80    112    
-208   -32    
-304   16     
-144   336    
48     304    
-192   112    
16     96     
0      16     
-48    96     
-64    368    
-128   288    
-32    48     
96     192    
112    208    
-224   -80    
160    -80    
112    80     
-240   0      
48     -80    
336    192    
-432   -144   
48     16     
-192   64     
96     32     
-176   96     
-144   -16    
16     -32    
-256   -32    
272    0      
-144   16     
96     48     
-48    -16    
-64    192    
48     -48    
112    128    
-96    -192   
0      -16    
-16    -16    
144    -128   
80     208    
208    96     
192    368    
-528   32     
80     64     
-128   128    
192    80     
-1760  -96    
112    128    
-128   -96    
96     48     
-64    0      
80     -128   
128    80     
-48    48     
-48    16     
-112   -144   
0      -32    
-208   -48    
112    128    
-32    16     
32     144    
-528   -112   
112    96     
48     -80    
16     160    
-48    48     
-96    48     
-96    -80    
64     32     
64     160    
32     -80    
-96    -48    
272    176    
-48    0      
-416   -64    
32     96     
-288   -48    
16     160    
64     96     
96     128    
-128   16     
-48    16     
-16    112    
96     96     
-128   -16    
128    -32    
-144   16     
64     16     
48     64     
-304   16     
288    176    
0      96     
-96    128    
-208   -112   
-144   0      
112    48     
80     16     
-208   48     
336    624    
368    336    
-240   -96    
160    -64    
-208   16     
96     96     
-112   -80    
192    64     
-288   -32    
16     16     
-16    -256   
0      160    
-80    0      
32     -112   
80     -80    
80     400    
-32    -80    
48     -80    
-288   64     
160    -160   
80     272    
-64    256    
-128   -272   
80     -64    
-64    -112   
16     48     
112    0      
176    224    
-176   128    
128    -80    
-48    208    
96     336    
-192   48     
-128   -832   
32     -480   
64     592    
-80    256    
-128   -128   
-80    0      
64     48     
-32    32     
-48    -96    
-80    -64    
160    -16    
64     224    
-96    48     
80     48     
-48    16     
48     80     
-96    -16    
-32    80     
-112   -32    
80     96     
-32    -160   
-32    -96    
128    -16    
-32    -64    
112    32     
576    512    
-336   464    
-16    112    
-224   -64    
208    -368   
-80    -752   
224    -272   
0      48     
96     -176   
144    128    
368    480    
16     336    
-192   288    
368    192    
-320   96     
-64    -16    
-288   -144   
32     -96    
160    0      
0      -128   
-64    -80    
-80    48     
320    -272   
-128   32     
752    656    
-112   720    
-112   496    
32     -80    
-112   -176   
64     -272   
-240   -208   
224    -256   
176    -96    
352    304    
32     448    
-80    160    
32     -80    
32     -64    
-160   -480   
32     -1984  
-144   -208   
320    192    
16     400    
160    208    
16     224    
-96    64     
96     -528   
112    96     
128    16     
16     -48    
80     320    
-112   96     
80     -48    
128    128    
-320   -720   
752    176    
-416   384    
416    -48    
-112   32     
240    224    
-400   64     
64     -384   
128    624    
16     -32    
80     80     
-112   432    
-16    -320   
-32    240    
64     288    
0      -16    
-112   -128   
0      -1888  
144    32     
160    576    
-160   384    
0      -464   
160    128    
48     192    
16     -80    
-224   -112   
304    304    
-256   272    
80     -80    
80     48     
400    -256   
-192   288    
96     -608   
96     144    
80     352    
80     64     
-32    -16    
-48    -32    
224    32     
-32    0      
-32    -16    
144    80     
144    48     
-80    -128   
128    0      
-80    -656   
-128   -368   
176    -512   
-16    32     
64     -864   
-80    -48    
48     -368   
64     -240   
192    -32    
144    16     
-192   224    
-80    32     
32     304    
112    -224   
-96    -160   
80     -48    
48     112    
-64    -192   
240    112    
-48    -848   
112    32     
-48    -1024  
-176   -304   
112    -176   
-64    -352   
-16    -576   
-144   -16    
256    -64    
32     -144   
64     -48    
96     -160   
80     160    
112    -16    
-80    0      
32     -272   
-16    16     
64     -304   
240    64     
-144   -64    
448    224    
-96    112    
128    -96    
-80    64     
96     -432   
64     48     
288    0      
-288   160    
112    -240   
64     144    
48     -32    
144    32     
176    48     
64     240    
-144   96     
64     80     
32     320    
144    -240   
48     16     
80     -432   
16     -80    
0      -320   
240    64     
-112   -96    
96     64     
-80    -160   
0      96     
80     -176   
16     32     
80     112    
32     208    
96     -688   
48     -160   
224    160    
-32    -112   
112    192    
16     -176   
64     32     
96     -80    
32     96     
16     -464   
112    -1040  
96     64     
-64    -32    
128    48     
0      -304   
48     -272   
144    -64    
-80    -464   
112    16     
48     -208   
0      336    
304    208    
16     -32    
-64    -384   
-32    -336   
128    144    
176    240    
176    208    
-288   -96    
-336   -240   
-32    -176   
-1184  -16    
112    -144   
0      -112   
48     32     
208    -128   
-32    -1632  
112    -32    
-64    64     
96     0      
-48    16     
0      32     
-16    -224   
-64    -80    
144    -16    
-144   -80    
-208   48     
-32    48     
-32    -160   
48     -160   
208    96     
-112   -112   
-16    80     
176    -656   
0      -16    
-288   -144   
128    -32    
-96    -144   
0      0      
-16    -32    
96     0      
-256   0      
80     -128   
-640   -80    
-128   -256   
496    -240   
-48    64     
336    16     
-80    -640   
144    32     
96     0      
-96    192    
16     16     
80     -80    
-144   -16    
-128   -112   
-192   -32    
80     16     
-400   -80    
32     16     
-96    -128   
0      -368   
128    16     
-256   -1024  
528    128    
-176   -144   
272    16     
-64    112    
224    -96    
-352   -160   
192    -80    
-192   -96    
288    48     
-464   -96    
80     -96    
-2032  0      
-16    -160   
128    80     
-144   -96    
128    96     
64     -96    
128    80     
-176   16     
192    -192   
-48    160    
64     16     
-240   32     
16     16     
-208   16     
-32    -224   
-464   160    
48     -176   
0      32     
48     -192   
112    48     
-32    -224   
224    80     
-608   0      
144    80     
-128   80     
32     128    
16     -80    
224    -80    
-208   -64    
128    -48    
-32    0      
-144   -80    
-96    80     
48     -368   
-176   -32    
96     -944   
-112   -96    
-80    96     
-64    -64    
-112   112    
144    0      
-320   48     
16     32     
48     -16    
112    16     
64     -16    
-96    -112   
320    448    
-80    -128   
16     224    
-128   112    
-832   0      
-112   64     
-912   -48    
-80    -16    
352    160    
-416   -368   
224    16     
64     304    
-80    32     
-256   -432   
-960   -224   
-144   352    
16     -224   
112    48     
-128   48     
-304   -64    
240    128    
-448   -16    
160    32     
-912   -32    
-16    48     
48     16     
-112   -48    
-64    -384   
64     640    
-272   -224   
-64    -80    
-80    672    
16     -496   
-160   224    
96     -144   
-128   -16    
-272   48     
256    -192   
-288   320    
112    32     
-688   32     
0      112    
96     208    
-144   464    
64     -32    
32     272    
-128   -160   
-128   -176   
48     32     
80     160    
0      256    
144    -80    
-112   -144   
-256   -32    
48     -32    
-672   80     
416    384    
-224   368    
80     -32    
64     -336   
640    752    
-80    576    
-192   64     
-16    32     
224    240    
-128   160    
-144   -80    
-64    -32    
-96    -16    
-16    0      
-176   64     
64     48     
-816   -96    
240    112    
-112   -112   
96     80     
144    176    
32     48     
-256   32     
192    192    
-304   -352   
80     -416   
-128   -32    
80     -48    
-96    -272   
128    -112   
48     64     
-384   -272   
80     112    
-480   -704   
560    -976   
-80    -240   
464    176    
48     -64    
384    192    
-96    160    
368    416    
-96    368    
-112   176    
128    80     
-560   -368   
448    -128   
-768   -112   
144    352    
256    176    
-16    -64    
-112   -192   
-48    -256   
64     -112   
400    672    
400    768    
-480   48     
-144   -880   
-304   -64    
48     304    
-320   -80    
-64    144    
-256   -32    
160    48     
672    336    
-208   704    
-96    0      
-80    -528   
80     96     
144    48     
-64    -288   
-16    384    
-176   -400   
128    -224   
-112   -400   
-144   272    
224    448    
-128   432    
80     -480   
-112   -192   
-16    256    
-80    96     
128    144    
32     -336   
-256   -304   
192    176    
-304   448    
-16    176    
-16    272    
96     384    
-64    144    
176    32     
-240   48     
128    192    
-80    -240   
304    -128   
-128   48     
160    -80    
16     -16    
32     64     
-64    48     
64     192    
-144   288    
-112   32     
32     96     
-144   80     
496    528    
-464   384    
160    192    
-256   32     
128    96     
-272   80     
112    -16    
32     32     
32     48     
160    80     
-208   160    
112    128    
-176   32     
96     32     
-96    48     
176    160    
-128   16     
128    96     
304    128    
-320   208    
80     0      
-208   0      
96     0      
16     0      
-48    -224   
80     64     
208    144    
-128   0      
176    160    
32     -48    
128    192    
-32    96     
-16    32     
-112   32     
32     64     
176    0      
48     96     
16     48     
-64    80     
-64    -208   
-64    -16    
80     96     
-96    16     
32     112    
-16    64     
112    368    
-128   0      
112    128    
16     -32    
192    128    
208    256    
16     112    
112    112    
-96    176    
80     112    
0      112    
240    0      
-224   -48    
208    112    
-144   -80    
112    -800   
16     128    
-16    0      
112    64     
0      128    
16     128    
48     160    
-32    -96    
-96    -64    
240    272    
16     96     
16     80     
-32    96     
-80    80     
32     192    
16     -432   
0      96     
16     80     
112    96     
-128   32     
-48    96     
80     80     
-48    48     
-16    -16    
32     -160   
-64    -80    
48     144    
-176   -112   
96     64     
16     -48    
128    -208   
-32    48     
96     -1168  
96     64     
48     96     
-32    64     
48     112    
96     64     
-256   320    
336    96     
-64    0      
160    32     
-112   160    
160    -64    
0      48     
176    48     
-160   80     
112    -304   
-160   -16    
160    192    
96     176    
-128   176    
160    224    
96     240    
-64    112    
176    64     
-80    96     
48     240    
240    -96    
-32    -32    
-48    -304   
-32    96     
208    0      
48     112    
16     -192   
80     96     
-128   -80    
240    192    
32     48     
-16    96     
192    64     
64     96     
160    0      
0      -112   
96     256    
64     32     
80     112    
-64    -288   
224    112    
-128   -432   
144    112    
-64    16     
112    80     
-16    64     
304    160    
-80    48     
96     48     
464    432    
-384   48     
240    -96    
-96    -64    
144    32     
-128   -624   
144    144    
-32    -32    
128    96     
0      80     
128    144    
-224   128    
208    176    
112    144    
112    -128   
-144   48     
304    -112   
-64    224    
128    -256   
-144   0      
80     -496   
144    112    
80     -48    
48     80     
48     64     
80     112    
32     -32    
144    0      
-160   96     
288    -176   
32     64     
48     -112   
208    32     
0      -80    
80     144    
48     -64    
-112   -16    
128    144    
32     -32    
-144   -16    
240    224    
-384   -16    
320    -848   
-112   -656   
48     -416   
32     -1232  
304    -48    
160    144    
48     272    
80     96     
80     -112   
112    48     
48     -48    
224    -64    
-16    192    
96     -224   
64     176    
-160   48     
128    -512   
-224   -272   
128    -400   
0      -144   
-16    -144   
160    -32    
-112   -848   
160    -208   
-80    -208   
96     -16    
-96    -96    
272    544    
-64    160    
-112   256    
-144   -16    
192    -32    
-1664  -240   
-112   -416   
32     -128   
48     0      
112    -112   
-32    -640   
96     -416   
-96    176    
128    -192   
96     -96    
32     208    
-64    -144   
64     -80    
-304   96     
224    -352   
-240   -64    
208    80     
0      -288   
176    -32    
-32    16     
176    -592   
144    480    
-272   -528   
-80    -336   
256    112    
-16    464    
192    -368   
160    16     
-32    448    
160    32     
-432   -144   
80     16     
128    -112   
256    -80    
-32    -64    
80     16     
32     -32    
48     -1072  
-32    48     
64     -144   
0      80     
16     -32    
192    416    
-128   96     
-16    -160   
-272   112    
336    -256   
-480   0      
144    16     
32     80     
80     144    
-48    -176   
192    -544   
48     96     
80     32     
32     -32    
-48    32     
16     -288   
-32    -192   
96     -80    
0      -80    
64     64     
-176   32     
80     160    
-1312  16     
416    -192   
-256   336    
240    -208   
-16    -16    
176    -480   
96     -160   
-160   48     
288    0      
-176   112    
64     16     
-624   -1056  
-32    -864   
32     -48    
-240   -256   
-416   -560   
-48    -304   
16     176    
80     -240   
-48    160    
128    -608   
64     -96    
-16    -64    
96     32     
-96    16     
144    48     
-160   -32    
-32    48     
-208   -64    
-240   -288   
-560   -272   
-16    -288   
288    0      
64     32     
96     352    
160    -288   
0      96     
16     112    
-64    96     
128    320    
592    944    
-464   1120   
-256   -416   
160    -1184  
256    256    
64     416    
-272   -16    
256    96     
-1424  -256   
96     -80    
-96    -304   
-480   -480   
160    128    
-912   32     
144    32     
-16    -224   
144    368    
-144   80     
0      -336   
-592   64     
-128   96     
128    -80    
-80    176    
-416   -352   
-48    -16    
16     112    
-208   160    
-32    48     
-16    -48    
-48    80     
-816   -64    
224    288    
-256   144    
48     -176   
-288   -128   
64     32     
-192   -480   
-160   -160   
-16    -128   
-112   0      
-208   -96    
-64    -144   
-144   -176   
240    -352   
-112   160    
96     64     
-224   -48    
-160   -64    
-192   144    
560    272    
-448   288    
304    240    
-496   -160   
64     16     
112    80     
-208   16     
-416   -384   
224    0      
-64    -16    
0      -96    
-816   -256   
400    80     
-896   16     
80     -16    
-96    -48    
224    144    
-112   -160   
96     144    
-48    -16    
-112   -128   
112    0      
48     -48    
-64    -128   
0      32     
16     0      
-64    16     
48     -32    
0      96     
64     160    
-352   -16    
112    112    
96     80     
-416   -112   
112    112    
48     48     
96     64     
-160   0      
208    96     
-256   48     
-16    16     
-112   16     
208    272    
-112   -32    
64     96     
-448   0      
0      -16    
32     -176   
224    32     
-32    96     
-96    192    
-96    32     
-112   -64    
-32    16     
16     -32    
112    48     
0      32     
32     64     
-176   -48    
16     -48    
-272   -48    
176    144    
-144   -96    
-96    48     
-16    16     
-16    48     
48     64     
128    48     
-64    -32    
-64    -112   
256    208    
-464   -64    
96     48     
-256   -80    
96     224    
-48    112    
0      112    
0      -240   
-16    -48    
224    176    
-160   16     
112    128    
176    32     
144    96     
-256   48     
-16    96     
272    208    
-432   160    
96     64     
16     128    
48     -16    
-368   -176   
112    -16    
-32    48     
-160   16     
160    192    
-192   32     
192    224    
-192   80     
-160   0      
-32    -48    
32     -112   
32     112    
-144   32     
0      128    
-336   -240   
-16    -16    
64     16     
208    160    
80     112    
-48    -32    
-16    64     
-32    -32    
-64    0      
48     80     
-144   64     
16     112    
144    128    
-176   -32    
48     80     
32     64     
256    -80    
80     176    
-96    16     
32     144    
32     -96    
-32    16     
-16    0      
-48    32     
32     96     
240    160    
-384   -64    
32     176    
-112   -32    
112    96     
16     80     
208    128    
-128   32     
-16    64     
-112   -96    
288    80     
-320   112    
112    80     
64     64     
-64    16     
80     144    
-128   160    
144    176    
-32    208    
80     96     
48     -80    
-112   -80    
128    -32    
32     80     
16     80     
160    192    
-48    -96    
256    -48    
0      -48    
192    32     
-144   48     
208    80     
0      80     
96     32     
-64    160    
80     80     
-96    -80    
224    -144   
64     -48    
96     16     
128    208    
-112   -16    
0      16     
80     144    
-64    32     
0      32     
48     160    
48     32     
48     -16    
64     -1040  
224    80     
-416   -496   
144    -160   
32     -96    
64     -512   
32     0      
416    368    
-16    176    
-96    272    
32     -32    
-16    16     
48     -144   
-80    32     
176    96     
-48    -128   
128    80     
-48    176    
0      112    
176    144    
144    224    
144    80     
-368   -432   
64     -160   
288    96     
-144   144    
144    192    
-336   96     
80     -64    
-176   256    
32     -144   
96     32     
480    -496   
-240   416    
-80    208    
64     160    
224    80     
-64    -96    
352    -208   
0      32     
-16    -336   
16     496    
64     208    
-128   16     
112    192    
32     -192   
-112   80     
-32    -448   
-32    80     
240    224    
-208   112    
-64    -256   
16     256    
-16    -224   
144    80     
16     192    
304    304    
-288   384    
144    -192   
32     -32    
160    -64    
144    80     
64     -320   
48     112    
64     -480   
16     112    
16     192    
400    -32    
-144   704    
-80    -368   
-48    -272   
96     288    
272    48     
32     192    
-32    -16    
0      -48    
48     16     
96     -432   
112    0      
128    -304   
48     240    
64     -160   
-192   -208   
48     -80    
64     80     
16     0      
96     16     
16     240    
16     -32    
-80    -352   
240    -752   
-48    336    
240    -176   
96     32     
192    -576   
-32    0      
-16    64     
224    144    
-112   -16    
96     80     
96     0      
-48    -192   
48     80     
112    -96    
80     80     
0      -112   
-64    -32    
480    0      
-288   192    
112    -752   
-64    -304   
16     -352   
128    16     
-64    0      
256    176    
-96    240    
-48    -112   
160    -304   
64     -160   
320    80     
-144   -112   
176    -80    
144    -96    
80     112    
192    0      
32     -128   
64     144    
160    -832   
-32    96     
48     -48    
224    -240   
-224   -240   
-128   -2592  
80     -352   
96     -624   
0      -64    
64     304    
32     352    
192    480    
-272   -224   
400    32     
-144   -272   
32     -288   
-368   -528   
-144   -352   
64     -128   
-48    80     
176    -80    
-80    -80    
32     -272   
112    16     
16     -208   
192    -1008  
176    176    
192    160    
-128   -144   
288    112    
-128   -64    
-208   -1088  
-160   48     
112    704    
-1584  -672   
240    0      
48     400    
0      -176   
-32    -64    
240    -1136  
16     352    
48     -16    
-32    -352   
64     32     
176    448    
-160   16     
176    -480   
-208   -80    
-80    -256   
0      48     
144    336    
80     0      
16     -368   
64     -192   
272    48     
-272   -256   
160    -96    
-80    128    
-16    -16    
144    80     
-112   -288   
176    -112   
-112   -32    
208    160    
-848   144    
80     -224   
208    -144   
64     -160   
176    32     
160    160    
-48    16     
16     -416   
224    32     
128    704    
416    768    
-144   144    
176    -208   
32     -96    
176    -64    
-16    -64    
96     -48    
-144   96     
-96    -128   
160    -96    
0      -48    
32     0      
0      -528   
0      96     
96     32     
96     192    
32     0      
48     64     
-16    64     
-224   -320   
-112   -64    
160    32     
-160   0      
96     -16    
-1264  -112   
32     -176   
-416   128    
800    -352   
-320   320    
352    -576   
-144   16     
224    16     
176    64     
80     144    
176    128    
-112   64     
0      -80    
128    -16    
64     -64    
-192   32     
-224   -144   
304    160    
48     -64    
128    32     
368    -224   
-208   -16    
-176   64     
0      -32    
-32    -64    
64     112    
48     48     
32     -96    
-304   -64    
112    -176   
-112   0      
208    -112   
0      80     
80     -240   
32     128    
-176   0      
0      -32    
-64    32     
80     80     
0      -16    
208    -48    
-224   -96    
192    48     
-128   96     
-80    96     
-400   16     
-1296  -144   
64     128    
-944   -400   
-80    32     
80     176    
-64    0      
-48    64     
-80    16     
-288   -240   
160    64     
-48    0      
-32    -16    
16     96     
-576   -80    
160    176    
-272   -128   
48     64     
-32    64     
-560   -32    
64     -192   
-160   48     
32     64     
-304   64     
-48    112    
-1120  -16    
-64    -32    
64     0      
32     96     
-352   -688   
240    32     
-64    0      
-96    32     
80     -64    
-96    -96    
0      112    
-112   -16    
-48    80     
-336   64     
48     16     
0      -80    
-80    0      
-240   -64    
-336   -160   
48     -176   
80     64     
-48    -96    
112    144    
16     48     
-176   16     
128    32     
0      64     
16     80     
0      48     
16     96     
-192   -240   
-48    -32    
-112   -16    
128    224    
-160   32     
176    128    
-16    80     
96     32     
-16    80     
-96    -16    
80     192    
16     32     
32     80     
-48    -48    
-80    176    
160    0      
-144   80     
-224   32     
-128   32     
-496   -96    
-128   112    
224    -128   
-208   -80    
208    64     
16     48     
160    96     
-112   16     
-64    -80    
-192   -64    
-336   112    
80     32     
0      0      
-144   -48    
-144   112    
-832   -336   
224    48     
-192   -96    
16     32     
48     0      
-144   -48    
336    160    
-336   144    
112    192    
0      112    
-16    32     
192    80     
-112   -192   
0      -544   
-48    -112   
-368   -144   
-128   -128   
256    224    
-192   -80    
480    288    
-416   80     
0      -80    
-80    -48    
208    -32    
32     0      
-96    -96    
32     -208   
-64    48     
-112   64     
-16    64     
-480   -144   
-48    64     
64     144    
-48    -16    
-16    16     
-96    -48    
64     0      
48     112    
32     176    
272    112    
-64    320    
224    64     
-64    -112   
80     -48    
48     -272   
-208   -288   
176    32     
-256   80     
224    64     
-16    48     
256    64     
-16    112    
160    192    
-64    128    
-64    160    
64     144    
-80    320    
208    32     
-256   -192   
80     0      
-176   128    
16     256
[truncated: 236,011 more chars]
