# Supplementary material for: A Fault Diagnosis Method for One‐Dimensional Vibration Signal Based on Multiresolution tlsDMD and Approximate Entropy
Source: Hindawi journal article supplement (doi:10.1155/2019/3262818), 2019-01-01
Supplement: f1 [file 3262818.f1.zip › 3262818.f1/gear signals/wear gear signal/Data6.txt]

-176   16     
48     -112   
128    112    
-144   48     
64     144    
-80    -48    
-160   0      
16     -160   
-128   16     
384    0      
-256   144    
192    -432   
0      80     
-64    0      
-80    32     
-48    176    
-32    80     
-160   -304   
80     96     
-256   48     
256    192    
-368   304    
-48    -80    
48     -176   
-48    -272   
0      -112   
-16    -208   
96     400    
-96    -48    
-48    -48    
-128   -112   
-64    16     
-224   64     
96     0      
-192   48     
-48    -48    
0      -64    
64     128    
-32    16     
-32    -352   
48     160    
32     64     
368    368    
-192   432    
320    -192   
80     624    
64     -192   
-208   0      
96     -480   
48     0      
240    528    
-32    0      
-320   -80    
16     32     
-336   -64    
32     48     
48     -96    
-160   -16    
-128   80     
-80    32     
-32    128    
-1312  -192   
48     -80    
128    16     
-32    80     
0      -96    
-64    -16    
-256   -176   
96     80     
48     176    
144    -64    
-304   -192   
-128   48     
48     -176   
-192   32     
96     208    
-96    208    
-128   -16    
576    80     
-224   48     
368    -272   
80     224    
176    240    
96     96     
0      -64    
176    32     
-208   -288   
64     0      
-64    -112   
-96    16     
64     144    
-592   -176   
224    192    
-672   -32    
-256   0      
144    0      
-160   64     
32     96     
32     0      
160    -320   
-224   -64    
144    160    
-144   -16    
80     176    
-160   240    
32     96     
-144   288    
-144   304    
-640   -48    
160    48     
-624   656    
240    384    
-432   -288   
-112   -16    
192    -368   
-16    -48    
-48    320    
432    352    
-96    256    
-160   -352   
-96    -528   
224    320    
-64    48     
-80    224    
160    272    
-272   144    
-112   -48    
-112   272    
-16    208    
-48    128    
-112   96     
16     32     
-288   288    
-80    -160   
-176   128    
-96    -64    
160    160    
-16    64     
-240   -512   
48     240    
-288   -352   
-176   656    
-176   -80    
-112   -16    
-96    544    
400    -96    
-512   -240   
224    -64    
-288   112    
944    576    
-880   0      
272    -1056  
0      736    
-352   112    
96     -464   
-208   128    
-48    -192   
-944   96     
64     80     
-32    -208   
-96    608    
256    -96    
-240   32     
64     16     
16     80     
-48    432    
-48    -352   
-240   -176   
-16    -64    
-16    176    
-48    -48    
-48    -192   
-576   -208   
-48    48     
-48    -32    
80     -96    
160    -272   
48     -304   
80     384    
-160   -192   
64     128    
160    448    
16     0      
16     -160   
160    64     
-176   -224   
272    224    
80     720    
64     224    
0      -64    
128    112    
-80    -304   
-96    -48    
192    112    
-112   240    
288    240    
-192   80     
176    304    
-272   -352   
16     -160   
16     -64    
-48    192    
0      32     
32     48     
240    160    
-128   176    
64     112    
160    432    
-112   320    
-16    208    
-112   -32    
64     16     
96     288    
-144   64     
-16    -144   
-224   -96    
304    144    
-192   144    
256    208    
-272   48     
-48    64     
80     128    
16     144    
-16    16     
-64    96     
208    0      
-304   48     
96     96     
-144   48     
-32    32     
192    192    
-80    -32    
-64    80     
-32    -16    
32     32     
64     112    
208    -64    
-192   336    
-16    64     
-368   -96    
160    -48    
0      48     
-16    48     
16     80     
-16    32     
48     160    
48     112    
-160   -160   
160    32     
64     112    
-16    32     
-96    0      
0      64     
-64    64     
0      112    
96     128    
-16    16     
16     -80    
64     96     
320    240    
-64    256    
32     208    
224    352    
48     176    
80     128    
-48    16     
-96    192    
224    320    
-32    -16    
64     -32    
-48    32     
144    48     
144    64     
32     -128   
0      -320   
80     -96    
144    144    
192    192    
-112   112    
-224   32     
-144   -288   
64     -144   
-64    -64    
32     144    
128    64     
64     48     
-16    96     
208    224    
16     -96    
208    -64    
-96    96     
96     -592   
-16    64     
80     16     
-80    -16    
272    304    
208    0      
-48    32     
16     -48    
48     208    
16     112    
-32    96     
192    224    
-32    160    
32     -16    
-64    32     
208    -288   
16     -64    
144    -176   
-240   -64    
208    -144   
112    336    
48     -432   
-208   -96    
112    -144   
96     -32    
144    208    
-144   64     
160    48     
-64    -208   
-112   32     
208    -64    
64     144    
-64    -512   
-48    -48    
256    -64    
0      48     
-208   -240   
128    96     
-192   -32    
96     112    
-96    96     
-64    -240   
96     192    
-112   -176   
64     64     
80     -144   
-128   48     
176    -736   
-256   48     
144    -16    
-16    96     
32     16     
128    80     
128    176    
0      224    
0      128    
16     -48    
64     0      
-128   -224   
48     -32    
64     240    
-48    80     
80     -192   
368    272    
-320   -64    
96     80     
-16    128    
160    48     
-80    0      
48     96     
-80    64     
208    -240   
0      144    
64     -160   
80     128    
-16    -112   
0      -192   
80     -16    
0      192    
-144   192    
96     112    
16     16     
208    48     
-224   -160   
144    -288   
80     176    
32     48     
16     64     
0      -64    
160    320    
-32    -448   
-224   32     
240    0      
112    96     
-80    -448   
-32    16     
32     -48    
96     -224   
160    208    
0      -32    
64     96     
112    -112   
16     -1008  
112    -112   
96     272    
512    880    
-256   384    
-176   -800   
624    352    
-288   288    
224    -1168  
-48    0      
112    32     
32     -752   
-368   -80    
-16    -448   
16     -160   
80     -768   
32     -16    
32     -1312  
96     -48    
64     96     
448    160    
-432   -560   
240    -192   
112    -16    
-16    -512   
32     224    
-64    -160   
-784   -32    
0      80     
112    -112   
64     -112   
160    -176   
96     -96    
96     -48    
0      48     
-16    400    
80     -864   
-32    144    
160    224    
32     -16    
-272   -128   
112    -128   
-112   48     
224    128    
-240   0      
160    -624   
144    208    
16     -272   
48     176    
144    -1152  
-32    80     
0      96     
-128   -352   
-80    -256   
-128   -48    
-160   -160   
208    112    
-480   384    
144    288    
-1888  -80    
96     -240   
-32    -16    
176    -64    
-144   0      
224    -144   
-96    32     
144    -560   
-112   48     
144    -16    
-64    16     
16     64     
32     48     
-224   -48    
32     -224   
-224   -288   
48     -144   
-160   -240   
-32    -96    
16     0      
128    -304   
64     320    
208    -384   
-64    224    
96     256    
352    -32    
-208   -80    
112    -224   
64     -176   
0      -64    
16     16     
-144   -80    
208    256    
-64    32     
-272   80     
-64    -512   
-32    0      
64     -992   
-272   0      
176    -256   
-16    -512   
-96    320    
400    -80    
-48    80     
176    592    
-304   -96    
144    -320   
-400   80     
-48    -160   
48     -272   
-32    -32    
96     208    
-16    -496   
-336   -448   
-96    -128   
320    -16    
-448   208    
240    48     
-80    64     
32     32     
-160   16     
288    -192   
-176   -240   
48     416    
128    960    
48     -512   
112    400    
-96    -80    
80     -176   
-128   80     
-64    -128   
560    464    
-384   -512   
144    -176   
0      -80    
-64    -336   
112    -512   
-256   -176   
336    176    
208    448    
-896   -448   
176    -128   
-1040  -720   
-768   -288   
80     224    
-272   608    
-64    480    
-224   272    
224    288    
-208   192    
-192   -80    
240    256    
-32    144    
64     -208   
288    512    
-624   -96    
-80    -32    
-80    -144   
48     -16    
0      128    
32     160    
96     112    
-752   -16    
-16    96     
192    80     
0      64     
-48    -16    
-48    208    
-448   -144   
16     256    
-32    176    
0      -48    
-48    -144   
-256   -432   
-64    -64    
-176   80     
-48    192    
-288   16     
0      48     
16     -64    
-128   16     
-384   176    
256    144    
-80    32     
16     144    
48     -32    
-160   -176   
-48    -32    
-16    16     
-64    128    
-32    128    
-176   48     
-112   96     
64     48     
-112   0      
-64    -16    
-128   -64    
112    128    
-96    -128   
-48    64     
-16    -224   
-208   -16    
128    32     
-64    0      
96     80     
-144   32     
240    32     
-208   32     
-96    -16    
-16    16     
-48    64     
-544   64     
-32    -96    
-80    48     
464    496    
-480   16     
144    80     
-224   64     
16     -64    
-80    32     
-80    -112   
48     -16    
-128   32     
144    48     
-128   64     
160    112    
-336   -112   
48     112    
16     80     
80     208    
-32    96     
80     160    
-64    64     
-160   16     
80     0      
-160   -32    
-48    48     
96     96     
-48    112    
-224   -48    
-64    32     
-368   -32    
80     80     
-448   96     
80     48     
32     0      
112    32     
16     64     
64     64     
-80    -32    
128    80     
16     96     
112    160    
112    96     
-272   -96    
352    208    
-96    112    
240    256    
16     -48    
-16    -32    
64     -112   
-96    0      
-16    0      
240    240    
-48    336    
-48    256    
112    -16    
-80    48     
128    -32    
-272   32     
176    224    
-160   144    
128    128    
80     144    
-144   -176   
80     -304   
-16    -16    
144    128    
112    112    
32     48     
-144   96     
-32    112    
-64    160    
-32    -64    
-144   64     
-16    144    
-304   -144   
144    48     
-112   144    
144    -32    
-32    48     
96     96     
-112   -48    
144    128    
112    -16    
80     16     
64     96     
16     64     
64     16     
-64    0      
64     -48    
-160   64     
32     160    
64     160    
112    144    
-208   112    
144    32     
-192   80     
32     16     
32     144    
-160   48     
48     32     
96     64     
-176   -32    
144    -48    
128    128    
-80    32     
48     48     
16     80     
160    368    
48     48     
-112   -48    
224    176    
-144   -160   
192    16     
-80    128    
80     0      
-144   -48    
192    112    
-64    16     
16     64     
80     144    
304    160    
80     144    
-128   96     
64     48     
32     112    
0      32     
48     16     
0      160    
-112   0      
-48    80     
208    48     
-112   64     
-48    -128   
48     64     
320    160    
0      256    
48     32     
352    256    
-208   208    
-64    144    
-80    96     
48     96     
16     -48    
64     -128   
128    256    
128    16     
-16    80     
-112   -240   
96     -992   
0      112    
-208   -32    
112    0      
176    96     
80     176    
-144   96     
32     112    
64     16     
64     208    
32     240    
368    464    
-176   -80    
64     112    
-160   80     
160    -96    
-48    160    
48     -1264  
160    384    
64     16     
-80    128    
-128   176    
160    208    
96     336    
224    368    
-96    352    
32     -336   
64     208    
240    224    
16     336    
32     -272   
144    -48    
-96    -832   
64     -96    
0      112    
48     80     
48     80     
32     64     
96     144    
0      48     
48     96     
-64    128    
384    576    
-288   -320   
-32    -496   
48     -192   
96     -96    
-144   -160   
384    112    
-160   -336   
80     80     
64     96     
32     96     
16     -112   
80     96     
-48    0      
80     80     
0      64     
304    96     
-224   112    
112    -288   
96     128    
-16    -192   
80     80     
-16    -448   
128    64     
48     -336   
32     128    
176    496    
-80    128    
-32    -176   
96     160    
128    -16    
-32    0      
16     0      
-32    112    
0      64     
-16    96     
160    144    
-64    -16    
80     144    
0      -1472  
16     144    
16     112    
96     160    
32     112    
128    96     
80     112    
-64    -112   
128    -80    
-16    96     
32     -176   
-288   -448   
368    -160   
-304   -608   
80     -320   
48     112    
48     64     
48     32     
32     176    
-32    -16    
-48    -64    
16     -240   
80     -96    
144    160    
128    -64    
16     144    
64     -160   
0      64     
96     16     
16     64     
-208   -1168  
32     -480   
80     176    
176    192    
-96    96     
256    32     
-96    96     
-16    -192   
96     112    
16     -48    
-176   -352   
336    704    
-128   416    
48     -448   
240    64     
0      -144   
144    -528   
176    304    
-272   -1184  
16     -352   
-32    672    
192    -128   
-320   -544   
80     -736   
-192   -176   
-16    -32    
-144   -48    
288    368    
-16    -480   
-16    -768   
144    128    
48     -304   
320    1120   
224    144    
-64    -208   
-656   -144   
144    -336   
0      -320   
112    112    
384    816    
336    -432   
-48    288    
208    176    
-16    -64    
-80    -304   
-16    -64    
144    0      
-128   -32    
-192   -176   
176    -176   
-256   512    
176    144    
-32    80     
-16    -128   
32     -32    
224    -384   
-208   -96    
336    -1408  
-336   -32    
160    0      
64     80     
-32    -192   
208    -64    
-176   32     
128    -128   
16     -128   
48     16     
-32    -16    
-96    -256   
176    -16    
464    -608   
-496   -48    
256    -32    
-32    -16    
192    32     
-32    96     
-64    -240   
176    -32    
-32    0      
192    64     
192    64     
-240   128    
-1648  -16    
-48    32     
96     -48    
-48    -80    
-224   32     
256    -256   
0      96     
32     -1104  
32     80     
80     -48    
-16    -32    
32     96     
0      96     
-48    32     
-96    -240   
-432   32     
16     -80    
-64    -16    
96     144    
-96    32     
32     -320   
64     96     
64     -1488  
144    -16    
48     -16    
0      400    
-240   -32    
128    -208   
-16    -80    
-272   32     
-544   0      
144    -16    
-560   32     
64     32     
32     -16    
-96    -208   
64     160    
208    -704   
-32    0      
-80    48     
128    -80    
-112   0      
-32    32     
-16    32     
16     48     
32     96     
32     160    
-112   64     
128    -112   
-160   0      
96     -48    
224    208    
16     -160   
96     -160   
-80    -16    
16     -32    
320    432    
-496   96     
144    80     
112    0      
-48    96     
112    -96    
-96    32     
144    48     
80     96     
-16    -80    
192    48     
-144   -416   
288    -176   
-288   144    
240    -80    
-32    0      
0      48     
16     48     
-240   -144   
-32    -48    
112    64     
-288   -336   
112    -256   
64     64     
-1824  -192   
32     16     
-96    16     
160    64     
-128   256    
160    48     
-80    -48    
-528   160    
-320   -192   
32     48     
0      16     
-128   -16    
16     -16    
-320   -96    
48     0      
-576   16     
416    80     
80     64     
-208   224    
-32    -32    
-368   -32    
64     32     
-720   -32    
-64    -16    
-160   -80    
-16    -112   
272    112    
-272   96     
192    -96    
-160   48     
-32    -64    
208    32     
-16    96     
-48    32     
-240   0      
240    128    
-224   -80    
-160   -48    
-16    208    
-464   96     
-16    -16    
0      -80    
-128   176    
0      -112   
-64    -64    
96     -16    
-112   -48    
-160   128    
0      48     
-256   16     
224    112    
0      112    
-96    48     
64     48     
0      -32    
64     16     
-176   0      
208    -32    
-112   128    
192    112    
-96    112    
-32    0      
-176   -16    
144    128    
80     96     
-16    -16    
16     144    
-64    32     
-48    48     
-240   32     
0      32     
-864   -16    
80     128    
16     -96    
48     160    
-64    0      
0      32     
-176   -496   
-144   -464   
256    128    
-368   16     
0      -64    
-192   -144   
112    128    
-64    256    
-48    176    
-272   -128   
96     96     
112    -64    
-464   -240   
32     -400   
96     96     
336    272    
80     80     
-144   -48    
16     80     
0      -80    
0      -160   
112    80     
48     112    
-96    160    
-256   -176   
144    -16    
-512   64     
96     160    
-64    16     
16     -112   
16     704    
336    400    
-336   208    
-16    160    
16     96     
32     96     
-16    336    
-256   336    
-96    192    
-48    64     
-32    -32    
16     -32    
-208   -720   
80     -528   
32     16     
96     32     
-32    112    
16     208    
-208   -32    
-112   0      
-112   -80    
-112   32     
-48    32     
128    336    
-176   0      
80     32     
144    112    
-176   336    
-208   -992   
496    -256   
-320   192    
400    80     
-128   112    
0      0      
-96    -48    
48     272    
64     -272   
80     128    
208    720    
-304   -144   
64     -32    
48     176    
64     320    
96     64     
-32    -64    
160    176    
-272   -32    
-16    -432   
-64    48     
-48    32     
16     96     
16     176    
-48    80     
64     320    
96     176    
-336   272    
176    -32    
-176   16     
176    256    
384    416    
-208   368    
-96    16     
112    16     
0      32     
96     80     
-16    80     
80     112    
-96    -64    
-144   64     
192    96     
-32    96     
32     64     
32     80     
64     80     
64     80     
-160   -272   
64     -192   
-80    32     
288    -64    
-240   -112   
32     32     
-16    192    
96     160    
64     224    
-32    -96    
256    -16    
-96    16     
16     64     
-272   16     
416    496    
-112   320    
-96    -96    
80     -64    
80     -16    
-32    80     
32     64     
48     96     
240    96     
-112   32     
48     16     
96     -144   
32     80     
80     -48    
-48    80     
112    32     
32     176    
256    416    
-224   256    
112    -32    
96     384    
16     672    
368    624    
-16    208    
32     -736   
96     32     
16     16     
96     48     
-64    112    
192    560    
16     272    
-64    32     
48     256    
-128   80     
96     0      
-64    80     
-32    64     
160    48     
64     192    
128    128    
-192   -512   
528    -1264  
-16    720    
0      -368   
224    -64    
-48    416    
160    -48    
-208   0      
368    928    
-176   240    
224    -64    
-144   -240   
208    192    
-176   -288   
16     -64    
96     48     
32     -368   
48     96     
-80    0      
-48    -256   
96     48     
48     -336   
48     -64    
0      0      
48     0      
144    544    
-96    400    
-16    48     
16     48     
-32    16     
480    544    
-496   -176   
80     64     
-176   -1328  
80     -144   
48     -96    
-32    96     
32     -16    
128    208    
640    144    
-432   0      
272    64     
-176   32     
128    32     
-160   -128   
96     144    
16     16     
-144   144    
416    176    
-592   -64    
224    -96    
-112   112    
-16    -64    
80     112    
16     80     
96     80     
384    336    
-416   -256   
272    288    
-368   -176   
176    32     
-32    -384   
144    80     
144    -560   
-16    0      
-80    -624   
496    192    
-400   16     
368    144    
-304   224    
320    -16    
-192   -64    
304    -240   
-16    112    
32     -224   
48     0      
176    -96    
-144   96     
0      -416   
-80    0      
288    -128   
-192   64     
272    96     
96     80     
208    272    
-288   -128   
-48    96     
112    -304   
224    96     
0      -16    
-48    128    
48     -224   
32     64     
64     -80    
112    80     
48     -720   
80     112    
-32    32     
240    -848   
64     112    
128    -48    
80     224    
0      -48    
32     64     
192    -208   
0      48     
32     -272   
64     48     
-112   -32    
80     112    
-16    -192   
-32    -912   
-80    -32    
48     -656   
64     -240   
80     -48    
64     -208   
-48    -160   
128    -1184  
0      -128   
-16    80     
208    16     
-144   96     
0      -48    
80     -624   
-48    32     
144    -48    
-112   64     
144    -368   
-16    -160   
-304   -16    
0      -544   
16     -112   
128    -400   
-48    48     
32     -352   
-32    0      
400    416    
-304   144    
112    -112   
-96    -32    
112    64     
96     208    
-400   -272   
-48    -224   
32     -112   
-192   -224   
112    -128   
96     96     
144    96     
48     -368   
128    -112   
48     -512   
-48    -16    
0      80     
320    96     
-128   -64    
304    272    
-352   64     
224    48     
-336   48     
96     -16    
-592   16     
32     -32    
208    112    
-128   -96    
-64    -96    
48     -64    
16     64     
192    112    
80     32     
80     -176   
144    -96    
32     16     
64     -48    
-32    16     
160    32     
-400   -240   
112    -336   
64     -32    
336    -64    
-160   32     
208    -192   
80     16     
0      -1760  
48     80     
-112   16     
112    -80    
-176   96     
272    -112   
-80    -48    
0      -176   
-864   -96    
112    -160   
-240   32     
48     -48    
-208   32     
512    -320   
-80    160    
128    -2896  
16     80     
-64    48     
208    64     
-128   -48    
16     -32    
192    -16    
192    192    
-432   96     
16     48     
-32    -48    
112    -176   
32     128    
80     -272   
16     112    
16     -160   
192    208    
-80    48     
-16    -80    
64     16     
128    144    
-208   -352   
48     -128   
-32    144    
256    -256   
-64    -336   
112    -368   
160    192    
176    240    
32     192    
80     -560   
48     -32    
-400   0      
32     -96    
-112   -80    
32     -64    
-48    16     
192    80     
-336   -32    
272    -208   
-496   -720   
64     -192   
176    320    
32     -16    
64     -80    
-1040  -288   
-96    -80    
-128   -464   
-96    -256   
128    80     
192    -256   
16     -48    
192    -16    
-128   208    
-128   -32    
256    224    
-736   496    
-32    160    
-368   -64    
32     -32    
16     48     
-176   64     
64     48     
-96    -64    
-112   192    
-208   -192   
-432   -112   
96     -176   
0      240    
288    -192   
16     112    
288    128    
-64    160    
-192   -800   
96     480    
336    480    
-576   -464   
128    -16    
-16    272    
-112   -16    
-528   -192   
-64    128    
64     -16    
-96    112    
-96    -240   
80     -32    
80     384    
-160   -112   
-80    -192   
160    288    
48     -32    
-48    16     
-80    -112   
96     96     
-288   48     
240    96     
-144   0      
-256   32     
224    48     
-224   -32    
32     32     
-48    -16    
0      80     
-16    16     
-96    -112   
128    -48    
-64    64     
112    416    
-144   240    
-64    48     
208    -64    
-128   32     
-576   -96    
16     16     
144    384    
512    656    
-64    272    
240    496    
-144   128    
-112   -48    
32     336    
-64    256    
-16    224    
-112   0      
32     -176   
-176   -112   
-208   -240   
-48    -400   
-96    176    
-192   48     
64     64     
-128   -192   
-192   32     
208    80     
-32    96     
48     48     
-16    64     
32     80     
16     80     
0      64     
-80    32     
32     64     
-48    64     
-208   96     
48     32     
-64    160    
-16    144    
-144   -336   
192    -64    
64     336    
48     160    
-64    128    
-32    176    
-192   -432   
112    -320   
-176   -192   
48     48     
64     32     
-160   -32    
-176   -112   
-112   112    
-784   -144   
-16    -16    
80     112    
144    304    
0      240    
0      416    
128    256    
32     -16    
-160   480    
-128   -432   
160    -96    
-400   -96    
112    64     
-208   224    
128    1056   
256    928    
-416   -304   
-32    -784   
80     512    
-16    -80    
-96    0      
192    128    
-144   64     
80     224    
-64    -144   
256    32     
-224   -368   
-32    384    
-16    96     
80     -16    
96     208    
-80    64     
160    48     
-144   -192   
64     -64    
80     160    
80     256    
-112   -272   
-64    -176   
-48    -16    
16     192    
-96    96     
-96    208    
-48    -16    
-208   -112   
-48    0      
-48    48     
-32    80     
-32    32     
80     176    
-32    0      
80     32     
-32    96     
96     144    
-96    64     
-96    -256   
32     160    
-64    -48    
-16    -144   
96     64     
128    112    
-64    96     
-32    128    
128    160    
-32    176    
-48    96     
48     -192   
208    192    
-32    160    
-64    64     
32     32     
0      0      
64     144    
16     144    
-64    -16    
80     144    
-64    544    
176    32     
-64    80     
256    80     
-176   -32    
224    160    
144    256    
16     144    
-192   80     
224    192    
-16    16     
128    -832   
48     -32    
64     16     
128    -16    
96     192    
-32    144    
-64    224    
32     96     
112    144    
-176   -32    
-48    96     
-16    160    
-256   -112   
240    32     
160    64     
144    -256   
160    208    
-48    96     
-80    -416   
400    -368   
128    -400   
32     -176   
144    96     
-32    32     
192    144    
-192   80     
112    240    
80     80     
128    128    
-176   -128   
80     -144   
32     144    
-192   160    
-48    128    
80     304    
272    352    
-96    272    
96     192    
-64    64     
0      64     
48     -48    
128    160    
176    32     
-128   32     
144    48     
112    -240   
-32    16     
48     -2240  
144    -96    
144    176    
192    80     
0      112    
48     48     
-48    192    
384    224    
-288   32     
160    96     
-16    -16    
-64    -128   
48     64     
-64    -192   
16     32     
0      -416   
160    96     
128    -64    
0      368    
-48    176    
-240   160    
336    272    
160    16     
-288   96     
208    144    
0      -16    
-64    -64    
48     208    
272    80     
-240   96     
64     -320   
80     16     
80     -1248  
80     160    
32     128    
16     208    
-16    48     
240    224    
16     64     
208    320    
-224   128    
0      -128   
128    -16    
160    0      
-144   64     
-48    -48    
-64    128    
96     -656   
240    128    
-272   -416   
256    128    
224    64     
-96    -80    
160    96     
96     80     
-64    128    
96     -80    
32     256    
0      -112   
0      64     
-48    -272   
144    -32    
80     -272   
-32    48     
-32    96     
80     112    
16     96     
128    96     
80     144    
0      -160   
80     32     
64     -224   
32     128    
-32    -80    
16     96     
64     32     
128    144    
-160   -144   
48     176    
144    80     
16     48     
64     96     
48     64     
96     -32    
48     -96    
96     144    
-112   -48    
208    320    
-224   -48    
320    96     
48     -144   
16     32     
96     -192   
-128   -368   
16     -480   
384    128    
-176   352    
304    64     
-336   -864   
48     -96    
-128   -880   
176    -32    
-48    -48    
144    -144   
96     112    
0      176    
192    320    
-144   -144   
384    -1056  
-272   368    
192    80     
-80    224    
112    -176   
96     -544   
48     -16    
64     -496   
112    -32    
64     -688   
96     -144   
128    -400   
80     80     
80     400    
144    -656   
-32    64     
336    752    
-288   -592   
-64    -128   
-176   32     
176    336    
-1024  160    
-176   -432   
96     -112   
-16    -368   
0      32     
0      -768   
240    160    
96     448    
-192   -384   
64     -112   
-144   80     
128    -288   
32     32     
-48    -96    
80     -144   
-832   -464   
528    208    
-32    128    
288    -176   
80     -416   
256    -304   
32     176    
96     -80    
112    208    
-176   -96    
192    112    
-32    0      
528    -272   
-240   256    
48     -176   
-208   -336   
336    272    
-528   -48    
112    32     
-80    336    
48     -208   
-144   320    
256    -976   
-384   -160   
80     -464   
-64    272    
-336   384    
144    -656   
-208   240    
-96    80     
-192   -304   
80     80     
-1280  -304   
-16    -272   
-64    656    
-112   -464   
-16    -560   
32     144    
-16    160    
64     -816   
-128   64     
560    96     
-528   -96    
-96    -544   
80     -208   
-272   80     
176    -256   
-432   -96    
320    240    
-544   528    
112    160    
128    96     
-96    -256   
80     64     
240    -528   
-480   32     
272    96     
-80    80     
-80    -16    
80     -64    
-480   -160   
128    -160   
-80    0      
112    224    
-48    240    
-32    -544   
-48    -304   
176    -144   
16     80     
160    -224   
176    48     
-16    128    
-64    -48    
-752   96     
-64    80     
-336   -400   
256    -208   
-112   -80    
48     64     
-336   32     
64     96     
32     -112   
192    -384   
48     656    
240    960    
-16    -160   
-400   -704   
112    -624   
-48    -416   
352    144    
-512   112    
368    144    
-112   80     
32     -176   
-640   0      
160    -80    
16     96     
-592   0      
64     112    
-16    0      
-272   -32    
16     -32    
-352   304    
208    -80    
16     -128   
144    64     
144    48     
-80    32     
64     -240   
112    0      
-272   -288   
224    144    
-432   48     
128    32     
176    176    
-736   -272   
96     80     
-48    96     
-112   112    
-912   -144   
-224   -144   
304    400    
0      80     
-224   0      
-64    32     
-144   -128   
-32    -336   
-144   -288   
-160   -112   
-64    16     
144    336    
128    368    
-288   192    
16     304    
-64    16     
-32    -64    
-240   64     
32     16     
-96    -16    
128    208    
-176   16     
-32    112    
-112   192    
-112   -16    
336    160    
-32    112    
48     96     
-112   48     
16     16     
-304   64     
-144   128    
-96    96     
-48    80     
-112   -48    
16     176    
-112   -112   
0      -16    
-80    16     
-112   -208   
32     16     
-176   -16    
-80    -16    
-160   -32    
176    192    
64     144    
-112   -128   
-160   -64    
-16    64     
-48    -32    
16     112    
-80    -112   
80     -48    
-112   96     
-80    80     
-208   -272   
-48    96     
144    32     
-128   112    
160    160    
-160   -16    
-32    48     
-80    48     
32     192    
-496   32     
-64    208    
-16    16     
-144   16     
96     32     
-112   0      
64     160    
-192   -48    
-176   -96    
-16    0      
-256   -96    
192    144    
-112   528    
-304   464    
176    384    
-288   48     
0      -144   
-32    -368   
16     -64    
16     304    
0      160    
112    -48    
-192   -80    
-208   -16    
32     176    
80     -112   
112    -16    
64     -32    
144    48     
208    -128   
-48    -64    
224    32     
80     208    
-144   -64    
144    64     
64     64     
0      80     
-80    -16    
224    320    
224    288    
-432   -304   
96     -112   
224    144    
-144   160    
-64    112    
-48    16     
112    -112   
80     0      
112    80     
32     96     
-176   -64    
-16    32     
80     -96    
48     96     
16     48     
160    96     
-304   -128   
224    48     
-96    112    
32     80     
-224   -128   
464    16     
-128   128    
96     0      
32     48     
80     96     
128    192    
-160   96     
64     32     
-32    16     
176    240    
-256   -144   
112    80     
-128   64     
64     64     
-16    128    
-160   112    
112    112    
112    16     
32     -32    
16     16     
16     48     
144    32     
-64    80     
48     96     
-80    64     
-32    64     
128    128    
96     128    
-144   96     
-224   -576   
-32    32     
208    192    
-320   112    
96     64     
-112   32     
96     -48    
-128   -32    
-16    96     
-16    32     
-16    -16    
16     -128   
128    -16    
-64    48     
64     80     
-32    96     
-80    32     
-16    -16    
0      16     
0      176    
0      144    
-176   16     
192    80     
-96    128    
80     80     
32     -48    
-80    48     
32     160    
-240   112    
192    -736   
160    192    
-144   96     
-16    224    
144    96     
112    64     
-16    32     
176    32     
-128   64     
0      -144   
-48    -64    
0      80     
-48    48     
-64    112    
-384   -544   
224    -272   
64     64     
208    272    
-128   304    
48     208    
112    352    
48     352    
-16    272    
144    160    
32     112    
-128   32     
80     112    
16     -80    
-32    -32    
-128   -128   
16     -1408  
-176   -272   
112    32     
16     416    
96     288    
48     64     
96     112    
96     16     
-96    320    
112    208    
-64    -320   
64     48     
-128   -80    
160    672    
-128   -288   
-112   -528   
176    48     
-16    -1984  
128    64     
-192   -160   
272    192    
-80    -80    
-96    -48    
16     -192   
64     176    
32     128    
144    112    
-176   -112   
96     80     
176    -64    
-128   32     
288    144    
-64    -80    
96     96     
-96    -160   
-16    -80    
224    -400   
160    256    
144    112    
-64    256    
144    544    
144    368    
-400   -384   
16     -208   
-144   48     
144    -64    
512    656    
-384   32     
48     -400   
560    -1568  
-64    336    
64     48     
128    48     
-16    80     
176    64     
-192   -208   
304    -352   
96     128    
160    -112   
-48    384    
176    -352   
-80    -320   
80     -112   
0      160    
64     -704   
48     -176   
96     160    
96     96     
-96    48     
320    528    
-224   544    
-112   32     
208    32     
-128   -176   
160    96     
-128   -288   
400    32     
-144   -208   
224    176    
-80    0      
208    208    
-272   -720   
32     432    
80     -128   
64     160    
176    352    
0      -80    
112    272    
128    -1168  
176    240    
-128   304    
96     -176   
48     -160   
-96    -16    
320    -688   
16     384    
208    -1008  
160    288    
144    0      
-96    720    
-64    -304   
-272   -656   
192    416    
-48    -208   
-176   -64    
224    -96    
-176   160    
160    -640   
-96    -128   
64     -576   
-288   -304   
400    -736   
208    -400   
-208   96     
80     -2128  
64     -1216  
352    752    
-176   -992   
160    -192   
-320   -1056  
608    -128   
-176   144    
-16    -144   
144    96     
-112   -144   
-16    144    
48     -192   
80     96     
80     -224   
224    -96    
0      112    
176    -64    
32     -400   
16     -16    
-32    -656   
336    -464   
64     -1616  
-160   -256   
432    320    
-176   0      
272    -224   
16     208    
112    -208   
32     96     
16     48     
-16    -16    
-96    400    
-48    -864   
96     -96    
-48    304    
240    -240   
-64    -48    
-16    64     
-48    -1216  
16     -144   
112    -304   
-32    96     
224    0      
64     -48    
-96    0      
96     -80    
-480   -16    
64     -144   
64     -16    
432    448    
-240   272    
192    -80    
-160   -176   
112    -1040  
0      0      
32     -176   
-16    208    
176    64     
-64    -96    
32     -16    
64     0      
-576   80     
-80    -176   
-816   -32    
480    176    
-64    -16    
-64    -720   
-448   -64    
112    -736   
-48    16     
112    -48    
32     0      
-208   -96    
16     -144   
-16    -112   
176    112    
-208   -16    
0      48     
-208   208    
80     -16    
-560   -80    
176    -80    
-16    48     
48     -64    
16     16     
144    -624   
-80    128    
128    32     
-80    -48    
160    48     
-80    48     
272    192    
-464   -192   
-48    16     
-288   -96    
-16    -64    
128    -176   
48     -64    
64     -160   
32     0      
32     -1968  
64     176    
-64    192    
32     144    
-208   16     
48     -64    
-176   -32    
176    32     
-272   -16    
144    32     
-64    112    
-32    -160   
80     144    
80     -256   
-128   -112   
112    -816   
192    128    
-48    -16    
64     16     
-96    -64    
256    80     
-16    96     
64     112    
48     32     
112    304    
-192   160    
32     16     
-208   112    
112    -48    
208    304    
-368   128    
128    -432   
-192   96     
64     64     
64     48     
112    240    
64     288    
-272   -112   
-80    -128   
64     -144   
112    48     
0      48     
144    176    
-272   -96    
-16    176    
32     16     
-1216  -48    
0      192    
-1040  208    
-64    208    
176    240    
-16    80     
-16    -432   
-16    -240   
384    -32    
0      144    
64     -48    
0      -64    
-112   -352   
-352   -256   
192    224    
-304   -48    
-256   -496   
288    192    
-752   224    
-1056  48     
-288   64     
-336   -128   
-80    64     
-272   16     
80     -48    
-240   64     
240    -16    
16     -48    
-80    -32    
-48    48     
-32    80     
-112   48     
-176   0      
32     -48    
-480   -144   
48     80     
-1392  0      
368    208    
-128   32     
16     176    
-304   -144   
16     80     
-64    96     
-192   -128   
144    -16    
112    128    
-224   32     
-96    160    
-48    -32    
-64    0      
0      80     
-320   96     
-160   112    
16     -64    
0      32     
16     -80    
-64    16     
-48    -80    
32     16     
-64    64     
-160   32     
-96    0      
96     192    
160    144    
-192   48     
-16    48     
-48    -32    
32     48     
-1184  -80    
32     48     
64     -16    
64     48     
80     96     
-96    112    
48     16     
-144   80     
144    368    
-160   48     
-160   0      
-64    -16    
-32    48     
-272   -80    
80     32     
-400   -144   
-64    -176   
32     0      
-48    96     
16     80     
-144   240    
32     336    
192    736    
-16    112    
-48    -256   
96     -32    
16     -48    
-80    48     
-32    -16    
16     80     
-432   -16    
32     112    
-32    48     
-208   112    
192    272    
16     96     
-32    48     
64     720    
192    272    
-464   -224   
64     112    
16     112    
64     336    
-144   16     
176    160    
-80    272    
-176   -192   
176    224    
-80    -32    
-96    -64    
128    -304   
-192   288    
64     -80    
-240   -32    
96     -32    
80     64     
-112   80     
208    992    
-304   -704   
-32    272    
-256   -160   
-48    -32    
80     224    
-32    48     
48     176    
-16    -80    
-64    112    
128    992    
-160   368    
-320   -944   
-64    -576   
16     288    
-80    368    
-224   -160   
128    64     
-176   48     
-16    -96    
-64    -32    
192    -80    
80     240    
-64    144    
32     48     
0      48     
80     112    
16     80     
-160   -16    
-16    -256   
128    80     
-32    -48    
64     -144   
64     48     
64     -80    
80     48     
-240   -240   
-144   -368   
48     -48    
-512   -432   
848    -272   
0      864    
672    992    
-64    400    
112    288    
48     144    
0      -96    
-80    -224   
-96    -128   
-128   -160   
-256   -336   
112    -16    
-112   256    
256    176    
-16    304    
-80    32     
0      64     
160    16     
-208   160    
304    -48    
-256   -432   
-224   -720   
256    240    
-80    480    
240    208    
0      32     
48     176    
336    368    
-160   176    
368    -128   
-96    -448   
80     -80    
64     240    
64     256    
-80    -48    
32     240    
-144   336    
160    -688   
-64    -208   
192    -128   
-208   16     
272    304    
0      352    
0      -48    
192    256    
16     -16    
192    144    
-144   336    
64     256    
176    -224   
672    784    
-672   -784   
208    -96    
0      112    
16     176    
-224   48     
208    16     
-80    544    
0      -208   
368    112    
-256   -208   
80     64     
-336   112    
144    96     
-288   -128   
96     64     
-160   -80    
160    -64    
-144   368    
-176   -736   
96     448    
64     240    
-32    240    
-64    -16    
16     -16    
-80    224    
-160   -112   
48     464    
-80    224    
112    -80    
-160   -160   
16     0      
128    -48    
-80    64     
96     -736   
16     -160   
400    192    
176    224    
0      112    
208    224    
0      288    
80     336    
0      240    
224    272    
-224   16     
32     -176   
352    -304   
-288   -432   
48     64     
96     -560   
144    -16    
240    272    
64     624    
-16    -112   
112    16     
-32    -96    
160    -64    
-48    -128   
224    144    
-80    176    
64     -432   
-176   -16    
176    -224   
80     128    
112    -896   
-16    112    
128    -2352  
240    240    
-208   320    
544    608    
-272   48     
272    272    
-128   160    
80     160    
240    272    
16     96     
96     96     
64     144    
48     272    
208    -256   
-160   32     
80     -96    
0      128    
160    112    
-160   16     
16     -80    
176    80     
96     16     
240    320    
-192   64     
-80    -128   
432    48     
-160   -320   
-32    -32    
96     -96    
-32    176    
-16    48     
16     96     
224    112    
16     -32    
112    -80    
64     64     
32     32     
16     -64    
112    144    
48     -336   
80     224    
32     -48    
80     96     
16     -64    
96     64     
-96    -144   
64     96     
-32    -144   
16     64     
128    112    
64     96     
32     -1008  
0      -192   
-32    96     
224    -112   
0      64     
32     16     
-32    96     
96     -256   
-48    80     
0      -112   
96     -624   
-16    0      
304    128    
48     160    
-80    -240   
16     -16    
48     -112   
208    96     
16     272    
16     -848   
80     -400   
-48    -352   
-16    32     
112    496    
-64    144    
80     96     
112    96     
80     -496   
-144   -48    
-416   -160   
-16    96     
160    64     
-64    -16    
-112   -128   
208    -112   
32     0      
0      192    
-16    -16    
240    64     
16     128    
112    -144   
16     128    
-272   -176   
240    176    
-96    32     
80     -48    
32     -96    
80     -240   
-128   -576   
128    -672   
0      -240   
112    -320   
0      368    
368    80     
-128   128    
320    48     
-32    -32    
144    80     
96     -16    
-112   0      
48     -96    
-336   -32    
496    512    
-608   192    
192    -176   
-128   -96    
208    -368   
0      -96    
48     -2144  
80     16     
144    32     
64     144    
-48    -128   
224    64     
-160   0      
80     -64    
-144   32     
48     16     
-592   240    
224    208    
-160   -80    
720    464    
-752   -16    
336    -432   
-128   176    
160    -48    
-64    32     
160    48     
0      -144   
192    16     
-288   -64    
224    -80    
160    32     
176    96     
176    -96    
-112   -144   
240    -144   
32     144    
64     -224   
96     144    
112    -720   
-32    144    
0      16     
-128   -48    
176    32     
-16    -16    
-192   0      
256    32     
-1056  -80    
112    -368   
-320   -48    
160    -128   
0      144    
-48    -320   
0      80     
96     -1040  
0      16     
-256   48     
-16    64     
-144   16     
112    96     
-160   -48    
0      16     
-128   80     
32     -224   
112    -272   
144    -144   
112    -32    
-48    -368   
224    112    
192    -416   
192    16     
-48    272    
16     -224   
-128   -80    
144    -64    
-96    32     
48     -64    
0      -16    
288    336    
-320   768    
48     -48    
144    336    
96     -368   
96     -192   
16     384    
-496   -208   
32     64     
-336   592    
-128   -240   
80     -112   
-192   -208   
416    320    
-384   384    
256    -416   
-32    64     
-432   -32    
80     80     
-112   -80    
336    32     
-352   64     
144    0      
-128   48     
-288   -16    
32     64     
-96    96     
-96    -32    
64     -112   
-64    -240   
-1200  -96    
-176   -224   
320    -288   
-80    480    
64     0      
48     -64    
-16    240    
-208   64     
-224   -336   
-32    176    
-96    96     
-816   -208   
160    -160   
-112   -256   
80     -64    
-16    -48    
80     0      
0      16     
-48    48     
-16    -352   
-304   -64    
64     96     
-80    32     
48     192    
32     16     
-48    80     
-416   -80    
-240   -528   
-1088  -128   
-80    208    
-48    -112   
-288   -544   
-224   -1104  
0      -112   
16     -304   
-16    -352   
48     16     
128    240    
-112   96     
80     32     
-192   16     
192    80     
-96    48     
-96    112    
-48    32     
-96    16     
128    112    
112    -80    
-160   112    
48     -16    
16     160    
416    608    
-304   448    
-32    64     
-128   144    
176    304    
-192   96     
16     208    
-512   -80    
80     -176   
-896   656    
-224   1184   
-128   160    
48     -128   
96     48     
-288   -496   
-256   -176   
-128   -448   
-304   -256   
80     112    
-240   64     
16     832    
-176   208    
-448   -448   
208    -80    
-832   192    
-128   -48    
192    224    
-368   560    
-336   352    
256    -496   
-400   -928   
320    400    
-144   416    
-64    -240   
-128   128    
-208   -32    
64     -48    
128    16     
-80    32     
-256   -432   
-208   -992   
304    -480   
-128   672    
48     288    
64     -32    
64     448    
80     -480   
416    464    
-48    352    
80     544    
32     -32    
-272   -560   
64     -896   
-64    176    
144    224    
-336   -32    
0      -160   
96     -144   
-64    464    
288    240    
-224   -144   
-272   -176   
16     16     
-128   -80    
-160   -304   
-80    -304   
-96    -96    
-96    -48    
80     0      
32     208    
144    400    
-288   160    
192    144    
-16    96     
144    112    
-32    160    
112    208    
0      256    
-48    96     
-144   -16    
-64    32     
192    16     
-384   -288   
224    96     
-352   0      
-32    16     
112    240    
112    144    
0      16     
-48    -16    
16     -144   
-48    0      
112    64     
-64    112    
48     144    
-144   64     
256    208    
-176   -96    
208    -64    
16     -336   
48     16     
48     144    
-224   0      
48     32     
96     128    
-112   -16    
64     96     
144    80     
-96    -112   
160    144    
16     -16    
64     64     
16     96     
112    208    
-160   96     
0      -16    
80     -48    
160    144    
112    112    
64     80     
0      208    
96     64     
-64    64     
-80    32     
96     128    
-48    48     
80     -80    
-176   -160   
96     208    
32     -64    
176    -160   
16     128    
272    128    
-96    -64    
48     -48    
64     16     
-32    80     
0      208    
48     48     
48     144    
-64    48     
128    96     
48     80     
32     -432   
64     -16    
-80    48     
80     48     
32     64     
-16    192    
-128   -48    
64     -16    
16     112    
112    48     
-144   -96    
176    112    
48     -320   
-160   208    
-32    80     
112    -32    
32     -16    
-80    64     
128    128    
-48    96     
16     48     
48     128    
64     256    
64     48     
32     64     
32     -32    
16     80     
176    192    
-192   80     
128    128    
144    -80    
-16    96     
0      32     
64     48     
64     80     
-240   -48    
368    -112   
-48    224    
192    112    
32     32     
176    -32    
-96    160    
112    32     
48     -240   
-16    64     
-160   -352   
256    96     
-32    -640   
48     64     
160    112    
96     160    
64     256    
80     176    
-64    -176   
-32    -32    
16     48     
64     -112   
-16    -16    
112    -112   
-48    16     
32     -80    
112    48     
144    -320   
0      112    
176    336    
-128   16     
-64    -80    
192    -32    
-96    112    
224    144    
-80    32     
192    32     
-16    112    
96     -32    
16     64     
160    -48    
-80    0      
192    32     
-80    96     
112    -464   
-16    128    
256    224    
-256   256    
16     -32    
-48    112    
-32    288    
176    -336   
48     112    
96     32     
-16    -48    
128    -208   
48     144    
-16    -512   
-96    32     
192    -208   
-48    -16    
-16    -416   
32     128    
160    192    
128    112    
128    192    
32     -48    
64     208    
0      -32    
-16    -64    
48     -464   
32     144    
-16    -96    
80     64     
112    0      
16     80     
-176   -80    
336    240    
-240   80     
-80    -128   
368    224    
-272   48     
96     32     
48     -144   
48     64     
-80    80     
208    96     
64     160    
256    0      
-272   -176   
672    320    
-384   80     
128    16     
-64    528    
208    80     
-192   -1008  
48     -448   
224    -528   
-16    -112   
-16    80     
-80    -80    
16     48     
32     -160   
80     -16    
64     -352   
-112   -64    
112    -80    
128    0      
80     176    
-320   -48    
272    32     
-48    -80    
48     -224   
0      0      
80     208    
240    112    
-128   -320   
-80    176    
-48    -128   
96     -304   
128    -240   
-32    112    
208    160    
16     368    
48     -16    
-176   -528   
128    192    
160    64     
-80    176    
-176   -448   
80     240    
-16    -1888  
128    -208   
16     80     
-16    64     
96     -128   
-96    208    
192    -224   
-128   64     
112    -208   
-128   112    
-320   160    
16     -96    
32     0      
-112   -160   
240    80     
-80    -64    
160    -64    
96     -32    
-112   112    
-96    -352   
64     -16    
48     -112   
128    96     
-128   48     
32     32     
-432   -48    
-16    32     
-144   -80    
0      48     
80     80     
48     -16    
48     -32    
64     -864   
16     80     
128    320    
16     144    
0      -48    
-48    160    
160    -160   
-128   -208   
-160   -48    
48     -112   
-144   112    
16     -32    
256    -32    
128    -304   
-48    0      
80     -368   
-48    80     
64     -16    
0      -80    
-16    32     
160    -80    
-176   16     
176    64     
-128   144    
-96    -48    
96     0      
-176   80     
-1024  -48    
-32    -480   
192    32     
64     -560   
0      96     
352    -288   
-16    96     
64     16     
-448   -672   
112    -160   
-80    -16    
64     -160   
-96    -128   
16     0      
32     16     
64     160    
16     -128   
-16    112    
128    -208   
64     160    
64     -464   
16     -80    
48     16     
-112   16     
96     64     
16     48     
272    256    
-144   464    
128    192    
-160   16     
-256   -144   
96     -256   
-16    32     
176    -304   
-176   32     
16     -160   
192    -112   
-720   -480   
-352   -1408  
448    368    
-416   832    
-64    -544   
64     48     
-176   176    
-32    -208   
-304   48     
256    -144   
-224   304    
-1312  -128   
-48    80     
-16    0      
-16    96     
96     128    
-672   -304   
32     80     
160    352    
-144   -96    
80     64     
-160   -144   
-240   -288   
80     -32    
-112   -144   
48     -128   
-96    16     
-112   128    
-80    128    
-368   -48    
-16    176    
-1040  -688   
-112   -144   
-560   208    
-144   64     
144    0      
-176   288    
112    128    
0      288    
-16    -64    
112    240    
48     -80    
224    400    
-480   -16    
-112   0      
112    112    
-112   96     
-208   -80    
160    160    
-400   -416   
-16    -112   
16     -176   
-448   96     
96     64     
-256   -112   
144    0      
272    432    
-224   16     
416    32     
-192   144    
480    176    
-512   0      
240    96     
-464   -16    
48     -48    
-192   32     
128    96     
-176   0      
160    160    
32     80     
-128   160    
0      96     
160    96     
64     48     
-144   32     
0      80     
96     144    
-352   112    
48     16     
32     64     
-176   112    
-80    0      
-112   -96    
48     96     
-96    -128   
-16    96     
112    64     
-16    128    
96     -32    
-64    -16    
112    224    
-352   -16    
48     144    
-48    64     
-32    112    
-240   -272   
-112   -16    
-1696  48     
16     32     
0      -160   
144    208    
192    64     
32     32     
-64    64     
-64    64     
-48    48     
16     112    
-48    0      
192    288    
-144   -32    
-208   -48    
240    176    
-176   -48    
160    96     
-128   96     
48     32     
-96    16     
32     64     
48     -96    
-32    64     
176    64     
-224   16     
64     -16    
-160   -48    
-144   32     
-160   -144   
32     32     
-352   0      
32     160    
-48    48     
-64    0      
-160   112    
144    64     
48     80     
64     16     
-160   208    
192    -16    
-208   -48    
128    32     
-80    0      
32     -80    
-80    176    
-16    -80    
-128   48     
32     64     
160    96     
-144   96     
224    0      
64     80     
112    -32    
-240   -48    
160    128    
-48    80     
16     48     
0      -192   
-48    -16    
272    176    
-368   144    
-160   -16    
96     112    
128    96     
48     128    
0      -48    
112    112    
64     0      
-48    112    
64     96     
32     32     
-80    0      
80     16     
-192   48     
-144   32     
96     96     
-16    0      
160    -48    
0      -32    
48     64     
80     32     
-64    128    
-96    32     
400    192    
-128   96     
-16    16     
-240   -48    
80     80     
-352   -128   
384    48     
-32    -80    
240    -16    
-144   192    
192    32     
32     112    
64     128    
16     64     
-32    112    
16     32     
-48    16     
48     64     
-96    -112   
64     16     
160    32     
-176   64     
192    128    
-160   0      
-48    64     
80     80     
-80    160    
64     80     
-192   96     
64     -48    
-32    160    
-16    16     
0      96     
0      32     
64     112    
112    304    
-240   112    
96     96     
-16    128    
-128   -16    
336    128    
-80    128    
80     48     
-64    -16    
144    128    
-192   32     
128    0      
16     176    
-80    96     
-368   -160   
352    -528   
-16    -512   
32     -288   
-80    -192   
480    416    
-208   464    
224    416    
-320   -112   
80     0      
-16    -128   
80     64     
96     32     
64     208    
0      -80    
0      -304   
176    128    
208    144    
128    480    
-160   256    
-352   -256   
352    -272   
128    -16    
384    272    
-208   64     
256    240    
64     112    
96     -32    
-112   64     
96     0      
-64    -160   
208    576    
176    176    
16     240    
-272   0      
80     96     
-208   -112   
-160   -48    
-144   -416   
288    -64    
32     752    
304    368    
-16    112    
48     32     
0      -160   
32     -192   
160    -272   
0      -192   
48     224    
-16    -912   
288    224    
-80    -64    
32     48     
16     -48    
0      -48    
48     48     
-16    512    
48     0      
-16    16     
-48    112    
96     -32    
16     112    
16     -96    
96     96     
32     16     
224    352    
-160   -560   
112    -16    
64     304    
352    928    
-80    224    
-176   -224   
64     -352   
-96    16     
144    96     
96     -240   
-16    224    
64     16     
-112   16     
144    -1072  
-64    -64    
128    -976   
32     144    
16     48     
16     48     
96     32     
128    96     
-80    80     
208    32     
-32    -48    
160    -48    
160    368    
-144   64     
80     -64    
64     -80    
96     48     
-128   -208   
272    112    
80     48     
-32    112    
80     80     
80     96     
64     80     
-16    -208   
96     128    
272    128    
-128   400    
192    272    
208    352    
-16    288    
64     192    
-48    -112   
64     32     
-32    48     
96     48     
64     16     
-96    48     
80     176    
-96    16     
144    -80    
32     -176   
-16    112    
48     -112   
0      -64    
32     -144   
96     80     
0      -160   
128    464    
16     144    
192    -1696  
112    768    
-640   128    
0      -432   
-48    -144   
48     -1120  
-16    -336   
112    -656   
128    192    
784    976    
-128   992    
256    1072   
96     352    
80     -160   
128    -176   
-16    -256   
112    80     
-384   176    
112    -128   
64     -64    
-160   -64    
640    624    
-496   -208   
176    -432   
144    -608   
96     -16    
48     -176   
32     80     
-176   -192   
224    -832   
80     560    
-48    272    
-640   -416   
176    -128   
-864   176    
80     192    
-64    -128   
128    -384   
-160   48     
144    -1200  
-48    -224   
-304   -624   
-32    128    
-32    192    
-112   112    
240    -96    
128    -160   
-112   -128   
112    48     
-432   48     
208    -80    
-128   -64    
224    32     
96     -48    
32     -176   
176    64     
-80    -512   
0      160    
-16    112    
16     48     
-160   32     
256    -176   
-64    0      
176    48     
-16    0      
-16    -224   
64     32     
176    -16    
352    128    
-208   -464   
384    -640   
112    -624   
192    240    
32     -64    
32     -16    
192    32     
-80    80     
128    96     
-192   -160   
352    -64    
-144   -32    
192    32     
-64    -32    
0      -32    
64     -352   
48     -48    
96     -704   
-80    64     
32     16     
192    -128   
192    192    
352    -96    
-416   16     
-16    -96    
-160   -128   
112    80     
-592   -352   
864    -160   
-496   0      
624    -400   
-240   128    
512    -48    
-112   192    
224    320    
64     -80    
-192   -80    
16     -128   
160    224    
80     -64    
64     144    
80     -64    
48     112    
-176   -128   
16     16     
-16    -80    
-64    176    
128    -208   
-64    128    
-208   48     
-192   -160   
-144   -160   
0      80     
-176   64     
160    48     
-320   -48    
176    -32    
-304   16     
-96    -144   
-576   96     
112    -144   
0      48     
-16    -144   
32     96     
-128   48     
96     96     
-32    176    
176    64     
-80    -16    
128    64     
32     -48    
-112   -96    
144    -32    
112    64     
48     64     
-1648  -176   
16     32     
-352   -160   
-736   -64    
-272   -208   
96     -144   
-160   144    
-816   -16    
-96    48     
64     16     
64     112    
16     48     
112    80     
-96    -144   
48     272    
-96    -272   
-80    -128   
-16    48     
48     208    
-240   176    
-160   32     
-80    -48    
-224   -128   
-96    64     
-784   -256   
192    -208   
-48    144    
64     48     
-496   -304   
64     -48    
32     -32    
-48    64     
0      48     
-32    64     
-16    0      
-224   -16    
288    48     
-176   80     
-64    -32    
-32    -64    
32     -48    
-960   -16    
-48    96     
-32    -80    
48     48     
32     -48    
48     96     
-16    96     
-176   0      
64     80     
-112   -32    
80     -48    
80     96     
-96    96     
-400   80     
80     80     
-624   -16    
64     96     
0      -96    
-32    32     
32     -80    
-144   64     
-80    64     
-32    16     
192    128    
-48    80     
-80    80     
32     -32    
112    32     
-208   -96    
16     128    
-112   -48    
-80    128    
64     -96    
-112   144    
-48    -144   
-16    64     
48     64     
96     80     
256    256    
-304   144    
-80    0      
-48    -32    
272    128    
80     224    
-208   32     
32     48     
16     96     
-464   -96    
32     16     
-80    -144   
416    -144   
32     -64    
-208   176    
-80    48     
-384   -384   
192    -80    
-64    448    
208    320    
-128   96     
-48    144    
-448   -144   
368    144    
-656   -128   
496    -32    
-32    192    
32     112    
-96    32     
-32    -64    
-64    -128   
-48    288    
160    144    
-208   -64    
-80    48     
112    272    
-48    400    
-272   -16    
-112   160    
-464   0      
-112   80     
0      176    
-48    96     
-144   -224   
224    288    
112    -64    
-80    -192   
80     160    
-80    48     
240    544    
-224   432    
-16    256    
-16    -208   
0      192    
48     -96    
-224   144    
128    0      
-96    -16    
64     48     
-48    -16    
32     80     
-96    -48    
-16    464    
64     336    
-112   16     
-48    -336   
-64    -272   
-32    80     
144    240    
-224   -80    
80     160    
128    336    
-240   144    
32     -32    
-112   64     
176    -208   
-176   144    
240    256    
-208   -192   
16     96     
32     64     
112    608    
-64    64     
32     -528   
96     240    
256    -16    
96     208    
-48    0      
176    -336   
304    272    
128    608    
-112   128    
-112   -400   
496    -32    
-128   448    
208    688    
496    144    
-192   384    
-32    -208   
192    48     
144    160    
80     0      
-32    -16    
160    80     
-144   128    
176    80     
32     80     
32     48     
0      144    
32     64     
-208   208    
96     -352   
0      96     
240    -80    
-240   -592   
32     16     
208    304    
64     256    
32     96     
-32    -96    
112    64     
32     -128   
-80    0      
48     -208   
-32    32     
64     16     
16     64     
144    128    
80     80     
32     304    
0      176    
-32    -32    
48     -224   
48     32     
128    32     
-32    -112   
32     64     
128    -32    
-128   144    
176    -16    
-384   32     
288    112    
0      112    
0      96     
32     80     
16     64     
48     112    
0      80     
64     80     
64     -48    
16     384    
48     144    
288    576    
-352   -192   
16     -48    
-32    96     
-32    -352   
32     -80    
0      -736   
-64    -176   
16     -288   
96     176    
-80    80     
128    -16    
-16    -48    
384    976    
-112   240    
-128   -496   
224    -112   
-48    464    
-32    -48    
272    -224   
-368   176    
64     -192   
192    80     
-80    448    
128    -32    
128    224    
144    816    
0      144    
352    640    
-112   -16    
48     -432   
368    432    
-80    400    
176    48     
144    -208   
32     304    
-32    -32    
0      80     
0      -336   
112    64     
64     352    
-32    -96    
-144   -288   
176    592    
80     240    
0      480    
64     256    
-32    64     
48     80     
-48    -400   
144    16     
-208   -544   
160    224    
-48    -112   
-32    112    
256    -480   
-144   240    
48     112    
-160   -96    
16     -96    
352    160    
16     192    
48     -48    
0      224    
-32    -80    
112    32     
32     -160   
144    32     
176    -368   
-80    -32    
320    -800   
-144   -16    
224    80     
112    224    
-32    224    
80     160    
160    368    
-144   -16    
16     160    
32     -128   
144    192    
-208   -16    
448    -64    
-96    96     
176    80     
-48    -48    
48     144    
160    80     
-112   160    
128    -48    
32     160    
-80    336    
288    -240   
-160   -48    
208    -128   
-96    128    
0      -112   
-128   384    
32     -112   
-144   -32    
48     32     
112    48     
-80    -48    
144    192    
-64    -160   
-16    32     
192    256    
128    80     
480    464    
-128   -32    
240    144    
-64    -32    
256    176    
-80    -96    
-64    32     
64     -192   
48     -384   
-128   16     
-160   -832   
176    192    
-304   0      
-48    -368   
32     -64    
64     -560   
0      32     
-64    -1648  
112    96     
-112   -176   
-96    -320   
-48    -16    
-112   -48    
-80    -496   
96     -64    
144    -32    
48     -80    
-80    -96    
-48    -464   
-96    -176   
224    -192   
-16    -160   
144    448    
-64    0      
-224   -2544  
64     -96    
96     -176   
-112   48     
16     -128   
-80    32     
48     -80    
-80    -48    
-432   -192   
16     -64    
-272   -32    
112    128    
16     16     
16     32     
256    64     
-224   -256   
80     -32    
0      -112   
80     112    
128    -144   
-112   -16    
208    -144   
-16    -64    
32     16     
0      0      
-32    48     
96     -48    
128    -160   
-80    -144   
208    -64    
-240   -608   
160    80     
48     -1376  
128    64     
80     192    
0      96     
-240   -112   
240    0      
-144   -48    
96     -96    
-480   32     
208    -96    
-944   -64    
144    -80    
-64    -80    
64     -48    
96     16     
320    -432   
-160   208    
-32    0      
16     -16    
64     80     
144    192    
-384   -112   
224    -80    
-288   64     
144    -80    
-560   -16    
208    16     
-208   32     
64     -96    
-16    128    
-96    -192   
128    128    
-32    80     
64     32     
64     48     
64     -224   
-96    80     
160    -80    
-176   32     
80     48     
80     80     
112    32     
-368   0      
112    -144   
0      112    
80     -208   
144    32     
64     -448   
144    0      
-256   -16    
-128   -208   
-16    -16    
192    0      
-176   48     
32     -112   
-368   -80    
16     -304   
160    0      
448    64     
-176   384    
176    112    
-16    160    
-80    96     
-64    -16    
-208   16     
96     32     
-176   32     
144    64     
-80    48     
160    48     
-224   -160   
64     -96    
-96    240    
192    -64    
-16    112    
-896   -272   
-208   544    
176    384    
-288   144    
16     -64    
-176   -112   
-160   -32    
208    32     
-192   176    
240    -560   
-16    176    
-176   -240   
32     -176   
304    496    
-144   -176   
-128   -448   
-432   -112   
16     272    
-144   16     
-32    -272   
-1040  192    
-112   272    
-32    -144   
32     16     
160    16     
-144   -32    
-32    -64    
80     160    
-464   -80    
64     -304   
176    560    
48     336    
0      16     
-80    48     
-192   -112   
-160   -144   
-16    64     
64     208    
-208   96     
144    368    
112    288    
-496   -288   
192    -48    
-64    -32    
176    -64    
192    64     
-160   144    
16     176    
-496   -464   
192    -400   
96     624    
-16    272    
-240   -96    
112    272    
-464   -48    
-144   272    
-48    240    
64     -176   
-32    48     
32     80     
-80    848    
-176   -1152  
0      -256   
-128   272    
-160   128    
0      -176   
-176   -288   
-352   -80    
-128   -368   
-736   -240   
304    528    
-272   -144   
144    -128   
-304   -160   
-16    96     
-128   112    
-272   -192   
160    272    
-176   -192   
0      -32    
-64    -128   
-192   -224   
112    448    
0      288    
-160   -112   
384    160    
-608   96     
96     0      
112    -304   
-448   -688   
144    560    
48     560    
-160   -32    
-144   208    
64     48     
-224   48     
-48    80     
-64    -32    
160    96     
-128   32     
0      96     
-384   -96    
32     64     
-80    -16    
160    288    
0      -256   
-48    -288   
-272   80     
-80    -256   
-80    -128   
-112   80     
48     0      
-96    192    
0      64     
-96    112    
16     -64    
-416   -272   
-64    288    
144    208    
-176   -624   
32     -144   
-112   416    
48     -336   
-16    272    
64     64     
288    384    
-304   624    
-160   -400   
-64    -688   
-176   64     
400    256    
-208   512    
144    192    
176    288    
-96    304    
64     -64    
-192   -16    
272    112    
-96    96     
32     80     
-32    16     
16     32     
-96    -48    
48     144    
-208   -112   
224    -128   
-192   112    
272    304    
64     400    
80     288    
-144   -224   
160    240    
-48    32     
80     32     
-96    -272   
-32    -224   
176    288    
-112   16     
64     -16    
-80    -16    
-176   -496   
-48    -112   
96     16     
-64    80     
192    272    
80     336    
0      80     
16     -80    
-80    -160   
96     128    
48     144    
0      32     
16     80     
352    256    
-256   128    
96     144    
512    608    
-192   400    
464    640    
-464   240    
48     144    
-16    -112   
128    -16    
96     48     
-64    -80    
128    96     
32     0      
-80    0      
112    224    
-224   -32    
16     -16    
128    112    
176    208    
-208   144    
32     64     
48     16     
176    128    
-160   96     
0      176    
-288   0      
160    -160   
-16    64     
-128   -80    
32     112    
80     64     
-32    -80    
256    -272   
-64    176    
240    128    
-272   48     
192    240    
-64    208    
48     48     
64     32     
128    32     
-80    48     
192    128    
-272   192    
96     16     
-64    0      
32     -16    
0      32     
-80    -16    
176    64     
0      -96    
64     -32    
272    -32    
64     0      
-32    -48    
176    -80    
16     32     
144    288    
-64    128    
80     -32    
-16    176    
-208   -112   
48     160    
-64    128    
-128   -112   
96     -304   
-48    496    
368    464    
-176   224    
144    112    
48     288    
-32    -32    
160    -32    
16     112    
-288   -224   
-256   -240   
144    -352   
16     192    
144    224    
0      80     
112    112    
-80    -80    
192    -160   
0      -32    
-48    -80    
224    272    
64     64     
208    192    
16     -48    
-272   -176   
144    32     
144    80     
-48    224    
160    -816   
160    368    
-224   400    
160    192    
96     64     
224    288    
-128   16     
-80    -160   
-128   -144   
-16    -144   
64     112    
-288   -256   
368    -144   
-80    -560   
304    16     
-112   -768   
240    80     
-96    -272   
176    144    
192    96     
-64    48     
16     -32    
192    240    
-16    48     
16     0      
224    176    
48     -16    
144    224    
80     -96    
192    128    
-192   -160   
176    160    
-208   208    
64     128    
0      16     
48     48     
0      144    
208    208    
48     80     
-48    -48    
96     -64    
-80    -112   
160    240    
-304   64     
96     80     
16     -208   
16     48     
112    -288   
-16    96     
96     48     
-80    48     
176    16     
64     80     
32     80     
32     144    
-80    96     
160    -144   
-16    80     
240    32     
48     144    
-64    -368   
64     0      
0      -64    
208    48     
0      176    
96     128    
-48    16     
-96    64     
192    80     
-96    -192   
128    16     
80     -160   
80     112    
144    -272   
-16    128    
128    -400   
-176   16     
256    -400   
368    192    
-272   48     
-96    -304   
144    80     
-96    32     
192    -1568  
0      144    
48     -1408  
-288   -288   
288    112    
-96    -112   
128    80     
48     432    
64     352    
-128   144    
80     0      
-32    -128   
64     -160   
240    336    
-576   -128   
96     -128   
-64    -240   
16     -608   
240    304    
144    -48    
-48    -144   
160    16     
0      -208   
16     -64    
160    -368   
64     -640   
-16    112    
16     -80    
0      -208   
-432   32     
-16    -16    
16     48     
112    -336   
96     0      
112    -64    
224    -16    
-32    -576   
-80    -304   
224    -32    
0      64     
48     -96    
112    96     
48     -32    
16     -128   
80     48     
-64    -80    
-656   -80    
128    -384   
32     576    
-32    -96    
48     -240   
-80    -944   
112    336    
80     288    
96     -16    
160    48     
-112   560    
-304   -256   
48     -448   
96     336    
16     288    
-496   112    
208    176    
80     -48    
-192   -464   
80     -496   
48     -672   
128    432    
-288   -2768  
144    -256   
-128   32     
-96    -48    
-80    -432   
144    -16    
-112   -368   
16     32     
288    208    
272    720    
-1552  64     
256    -208   
-80    -160   
0      -144   
256    48     
272    -464   
-16    144    
208    -176   
64     16     
288    80     
64     112    
112    -176   
240    -32    
-128   16     
224    -240   
-304   336    
128    80     
-528   -336   
512    32     
-80    960    
368    -192   
-352   -432   
176    -464   
-112   32     
160    448    
-288   -192   
-80    -448   
-96    -48    
48     1056   
-128   -528   
-528   -368   
832    -160   
-96    736    
64     -144   
-48    -112   
32     -480   
528    32     
224    1152   
-96    -144   
144    -416   
192    272    
-112   -32    
96     48     
-144   -224   
384    -32    
-144   224    
240    336    
128    -176   
288    -400   
64     320    
272    32     
-48    256    
224    -144   
-128   368    
192    -192   
-16    160    
128    96     
-64    176    
-224   16     
80     -144   
-128   96     
80     -256   
128    416    
16     32     
96     528    
-432   -208   
-816   -96    
-192   -32    
-1536  0      
-208   -400   
-48    -192   
-48    208    
0      -288   
-288   208    
112    -64    
-240   -160   
-16    -272   
96     320    
-48    -512   
288    368    
-752   -176   
-32    -272   
16     0      
16     176    
144    464    
-624   -96    
-48    -560   
192    -16    
128    192    
-16    128    
48     192    
-256   -288   
-64    -240   
-240   -32    
-48    272    
-176   -128   
48     32     
0      112    
-144   80     
-128   272    
-576   -160   
272    336    
-752   208    
16     0      
-160   128    
-80    64     
-32    32     
-16    16     
-96    -80    
32     16     
0      32     
-128   -16    
0      64     
0      -176   
-160   -160   
16     -32    
0      -240   
-272   -96    
-16    80     
-576   96     
16     96     
32     0      
144    144    
-16    -16    
-32    0      
-16    -96    
0      -144   
64     96     
-64    80     
-16    48     
96     208    
-224   64     
-192   48     
32     -160   
-464   -80    
48     80     
-144   32     
-48    -48    
96     -16    
-96    16     
-128   48     
80     0      
-32    64     
64     64     
-16    128    
-48    112    
-32    -16    
176    -16    
64     112    
-336   0      
208    96     
-32    16     
-16    64     
0      96     
160    192    
-224   -16    
64     32     
-16    96     
-32    80     
-32    64     
-240   -64    
96     112    
-48    80     
-32    128    
96     336    
-144   32     
-640   -272   
-64    -96    
224    112    
-32    112    
-160   -128   
96     32     
-48    48     
176    176    
-368   112    
-48    -112   
96     80     
48     160    
-240   -80    
-272   -144   
-32    176    
-352   -32    
96     272    
176    192    
-304   -304   
64     -176   
-176   -256   
96     -176   
-16    -112   
32     192    
112    320    
-32    240    
-112   192    
-272   224    
-80    32     
-192   -16    
-64    256    
176    144    
96     208    
16     -32    
16     48     
96     144    
160    112    
112    144    
208    160    
-64    -112   
64     128    
272    544    
96     -16    
-272   -144   
480    256    
-32    128    
64     16     
-16    96     
64     -16    
-48    16     
48     128    
144    48     
-128   -80    
16     128    
0      16     
128    96     
-32    48     
336    288    
-336   160    
256    -64    
-288   96     
176    -48    
-48    64     
224    96     
32     -16    
128    -112   
-96    128    
496    16     
-368   160    
352    48     
-384   16     
32     128    
-96    96     
-144   -16    
0      32     
-64    64     
0      288    
192    64     
-80    96     
144    80     
-112   -160   
-160   16     
0      -16    
-64    80     
-16    48     
-32    80     
-16    128    
32     144    
-352   -64    
144    80     
-64    32     
48     32     
-80    64     
32     -48    
80     -48    
-48    0      
112    32     
32     96     
64     -176   
-80    -96    
144    144    
-144   64     
160    144    
16     48     
48     48     
112    176    
160    144    
128    160    
-48    160    
-112   112    
128    208    
96     128    
-96    176    
-32    144    
-128   -32    
144    80     
208    352    
0      -16    
-16    80     
-16    96     
80     96     
-16    128    
-64    144    
96     128    
96     -112   
-32    64     
-80    368    
64     320    
32     48     
-16    -192   
192    128    
-192   -96    
64     32     
96     240    
32     -496   
64     144    
80     32     
112    96     
128    64     
0      128    
112    32     
32     96     
64     -48    
32     112    
0      48     
160    464    
160    32     
-32    -208   
-160   -240   
224    -128   
0      112    
0      576    
64     -240   
288    448    
-128   352    
80     48     
-48    208    
96     352    
-80    48     
80     240    
-32    -96    
48     48     
16     32     
160    16     
-112   -256   
128    0      
-16    -1024  
64     80     
-128   -112   
160    144    
80     48     
80     160    
80     -48    
16     48     
80     64     
-176   -80    
32     16     
176    -128   
112    496    
112    -448   
-128   -416   
80     -560   
176    32     
64     240    
128    144    
-64    96     
272    144    
-128   64     
112    112    
-32    0      
96     112    
80     96     
48     -80    
32     80     
32     -16    
80     80     
0      -80    
64     48     
128    -320   
208    272    
-80    -160   
208    48     
64     224    
-64    192    
176    80     
-16    -112   
272    96     
-352   -896   
480    96     
160    304    
272    352    
400    -48    
16     272    
240    -416   
-176   -16    
416    -144   
64     -288   
-144   -400   
816    64     
0      864    
144    32     
-32    -144   
224    -48    
272    64     
-464   -560   
848    -240   
304    352    
512    496    
-256   -464   
320    768    
-112   -112   
336    64     
-208   304    
-384   -672   
192    -128   
-64    256    
32     -80    
32     48     
48     192    
144    -64    
-240   -144   
224    192    
256    256    
-240   -336   
80     -992   
32     544    
-160   -912   
-240   -112   
-816   -432   
0      160    
288    432    
-336   -496   
192    -176   
-32    -2000  
128    -288   
160    -48    
-16    -176   
-48    352    
416    304    
-464   -608   
208    128    
-48    -176   
48     -304   
-464   -32    
0      -144   
144    64     
336    848    
-592   -592   
-16    -1280  
256    576    
-32    640    
48     160    
96     -608   
-16    96     
240    112    
-224   112    
160    -160   
-96    -368   
-32    -64    
176    288    
144    432    
192    16     
112    -112   
16     -240   
-16    144    
208    -1168  
16     -160   
0      80     
-368   256    
160    112    
-64    80     
-48    64     
64     96     
-688   -112   
80     -64    
-1872  96     
0      112    
128    272    
96     -16    
112    32     
-80    32     
-384   48     
224    -64    
32     224    
176    144    
16     176    
96     128    
-224   -32    
-16    -32    
96     -272   
-160   -128   
272    -80    
240    -96    
112    -128   
112    -80    
208    -496   
112    192    
96     -1360  
192    -272   
32     0      
288    -80    
-80    -32    
112    -32    
-80    32     
80     0      
48     240    
-96    -144   
-1456  0      
-112   -128   
256    256    
160    -80    
32     288    
128    -208   
-48    256    
128    80     
176    80     
-96    -16    
64     0      
-128   -160   
144    -144   
-336   48     
224    -160   
-400   32     
80     -160   
-272   -32    
576    -368   
-304   128    
48     -1312  
80     -80    
176    192    
-176   -16    
-48    -16    
176    16     
-544   -112   
96     48     
64     96     
-16    -32    
-80    80     
160    -128   
32     160    
112    -144   
-32    128    
176    -208   
-80    128    
-64    160    
112    48     
-128   -48    
32     -48    
48     32     
32     0      
0      48     
-48    32     
-160   48     
16     -160   
-64    176    
128    -128   
-96    -128   
176    -16    
96     -96    
-304   -16    
224    -80    
-224   0      
32     -64    
-64    -96    
-208   160    
80     64     
224    112    
-368   -32    
-96    -112   
96     -80    
-304   -48    
80     64     
-256   -224   
-64    -48    
-64    80     
-128   96     
-96    160    
-464   496    
-288   160    
128    64     
-64    32     
112    -32    
0      32     
-272   -64    
192    208    
-32    80     
-144   160    
144    -80    
-176   32     
-64    64     
-224   -80    
48     -80    
-304   -80    
-128   16     
-576   -48    
-48    48     
160    192    
-128   80     
144    -96    
-80    64     
256    -128   
-160   64     
80     16     
144    176    
-176   48     
-144   -96    
-192   -144   
-480   16     
-160   288    
-528   -80    
-80    64     
448    48     
-240   0      
96     32     
96     96     
80     -112   
-80    80     
-208   -352   
-80    -32    
-144   0      
-32    16     
-192   48     
-48    -304   
-16    144    
288    368    
-352   16     
-560   -448   
128    128    
-64    -64    
-48    96     
-112   32     
80     -16    
-96    112    
64     96     
32     176    
32     -64    
32     176    
240    272    
48     0      
-176   -64    
32     16     
-288   -192   
64     160    
160    96     
-352   208    
176    16     
-144   64     
240    -32    
-112   96     
144    48     
0      64     
64     48     
208    224    
-304   160    
-176   -48    
32     48     
-16    48     
-96    32     
-416   0      
240    224    
-240   128    
128    32     
208    304    
-288   96     
80     80     
160    80     
0      80     
-80    -80    
176    -80    
608    464    
-512   304    
0      112    
144    0      
-208   -16    
160    -64    
-48    -48    
176    64     
128    80     
32     64     
80     96     
-64    128    
128    176    
-112   112    
48     0      
-112   -96    
256    144    
48     112    
-160   -144   
-560   288    
-128   256    
-16    -96    
48     -176   
-144   176    
80     -512   
160    496    
-336   -560   
-16    -224   
160    496    
-128   -304   
96     224    
-160   288    
-256   -704   
208    16     
-128   112    
224    416    
-224   688    
-80    -320   
64     -48    
-96    160    
320    128    
-288   240    
128    48     
64     16     
-16    80     
-96    -48    
80     96     
64     48     
-112   96     
176    96     
-48    64     
48     96     
-80    -32    
128    -16    
-80    192    
144    -48    
-144   -208   
128    160    
-160   16     
80     144    
-96    -32    
80     -96    
-80    -32    
80     -208   
16     112    
96     192    
-208   16     
368    160    
-224   160    
64     96     
-48    48     
-64    -16    
-16    48     
0      64     
96     96     
-80    0      
16     192    
-352   -32    
48     -240   
-112   48     
-16    192    
32     32     
48     128    
-96    64     
112    48     
352    544    
-16    448    
48     304    
-16    336    
80     112    
64     0      
48     80     
-64    32     
176    48     
-96    144    
208    32     
16     320    
128    80     
144    112    
-96    16     
112    144    
-16    112    
112    64     
-144   80     
48     -16    
32     112    
48     64     
-64    -160   
80     -80    
-96    -160   
160    -176   
0      80     
32     -192   
80     48     
-272   96     
256    -480   
-32    160    
304    352    
-208   -32    
48     176    
48     -304   
144    -224   
208    144    
-224   0      
224    -320   
0      112    
16     48     
80     -272   
0      128    
0      80     
64     48     
64     384    
-144   -304   
128    272    
80     -208   
176    832    
-160   -32    
64     -80    
64     -208   
-96    96     
208    256    
-224   -144   
176    16     
-160   0      
224    480    
-384   16     
272    64     
64     688    
-160   0      
96     -128   
176    336    
-16    -80    
-144   -16    
272    -112   
0      112    
336    160    
-64    320    
80     48     
-96    48     
-16    -48    
64     128    
32     -192   
-112   -272   
-16    -160   
304    144    
-320   -304   
144    -144   
32     96     
-32    -48    
-32    144    
352    -288   
-288   224    
128    48     
-192   336    
-16    -64    
32     -96    
48     0      
0      16     
-128   -16    
0      -96    
32     160    
32     32     
80     64     
0      -208   
112    464    
-48    160    
64     688    
32     -784   
-160   16     
80     0      
96     112    
-80    192    
16     80     
80     0      
-32    -32    
320    352    
-16    -80    
240    128    
-64    -256   
112    144    
96     -288   
0      80     
16     -432   
96     96     
128    16     
0      112    
80     64     
-48    80     
-32    48     
96     -48    
112    96     
224    -144   
-224   -32    
96     -144   
64     128    
16     -96    
160    16     
208    64     
144    64     
128    96     
144    96     
-16    16     
64     48     
80     128    
192    -160   
-128   160    
80     -80    
-32    64     
224    32     
16     128    
0      -80    
192    272    
16     -64    
32     -16    
48     80     
16     -96    
64     80     
32     -256   
80     -160   
48     -144   
64     -48    
48     -48    
0      -32    
96     -256   
128    112    
-144   -336   
208    32     
16     0      
80     -544   
288    320    
-352   -416   
224    -304   
-1136  -80    
352    -96    
-464   -96    
288    16     
-64    -16    
80     -1504  
0      -112   
-48    16     
-128   -320   
224    -128   
304    240    
-16    -384   
0      32     
80     -560   
176    32     
-320   0      
-32    -32    
160    16     
16     -512   
16     -48    
64     -848   
160    16     
32     192    
96     80     
-16    32     
80     64     
-96    -192   
32     112    
96     48     
-64    -64    
-144   -32    
464    160    
-320   -128   
-32    -160   
224    -80    
32     -128   
144    80     
-64    -1168  
80     -96    
-128   -304   
208    -16    
-80    -32    
32     368    
80     64     
-32    0      
-272   -176   
-16    -208   
-1792  -224   
32     -128   
32     -96    
-16    48     
96     128    
-96    -192   
-64    128    
144    -16    
32     48     
288    32     
-32    160    
128    304    
-160   -48    
-144   16     
64     -144   
-224   -16    
128    0      
-160   32     
192    -176   
-368   -64    
16     -288   
176    -128   
-128   -1600  
352    48     
128    128    
-80    -64    
-32    48     
64     128    
-128   32     
80     -32    
-304   16     
192    -112   
-1008  96     
-16    -208   
48     80     
96     -16    
112    -16    
176    -640   
0      32     
-128   -32    
16     -64    
64     128    
48     32     
16     -16    
-160   -48    
208    528    
96     144    
-128   -16    
64     64     
64     32     
-16    160    
80     144    
48     -192   
112    64     
-224   0      
176    96     
-272   16     
48     16     
-32    16     
48     -16    
-112   32     
144    304    
0      32     
64     0      
144    32     
-48    -304   
208    -32    
-160   -272   
576    -128   
-416   48     
160    -32    
-320   -128   
384    160    
-96    32     
16     -160   
-80    128    
96     16     
-272   16     
112    -192   
-256   80     
-112   -352   
-16    0      
-832   -80    
64     112    
-208   -64    
-128   128    
-16    96     
-16    -48    
-112   -64    
176    80     
-144   -224   
-16    -128   
160    32     
-832   -32    
-80    240    
-144   -160   
144    336    
-320   368    
-336   288    
144    384    
-448   192    
16     -48    
0      384    
-128   64     
192    -272   
-32    80     
48     -96    
96     48     
-64    -176   
80     272    
16     -432   
-64    -208   
-16    -16    
-80    192    
304    -80    
-400   384    
224    64     
-320   -112   
-192   -240   
-624   -272   
-32    432    
-128   -48    
32     -64    
112    128    
-64    128    
0      -144   
-64    -48    
96     16     
-32    -80    
-16    64     
-112   -288   
16     0      
-32    -16    
-160   -48    
-16    -96    
160    208    
-384   48     
192    32     
0      -64    
-128   96     
96     -48    
-48    32     
32     48     
-128   48     
176    128    
-144   0      
-48    -16    
-32    16     
16     80     
160    160    
-128   -64    
-240   -64    
192    208    
-160   -144   
160    64     
192    208    
-128   320    
64     32     
-160   -96    
-64    -96    
-96    -96    
48     144    
0      -32    
-208   -128   
0      -272   
-128   -16    
-160   80     
48     96     
-160   -144   
96     112    
64     160    
-64    16     
80     80     
-288   144    
48     208    
-96    64     
16     48     
-176   0      
-32    0      
-48    80     
-192   144    
-16    0      
-160   -128   
-368   -496   
80     16     
-80    -176   
-112   -208   
16     256    
16     64     
-48    64     
-48    80     
-112   144    
128    80     
-128   64     
-256   -320   
80     48     
-352   48     
80     48     
-1104  -64    
-32    80     
-32    64     
-16    0      
160    592    
-208   192    
16     -320   
-160   -48    
32     176    
-160   -144   
128    -16    
-112   240    
96     96     
-96    -64    
352    880    
-16    -240   
240    560    
-320   -624   
96     48     
48     -16    
-64    48     
16     416    
80     -224   
64     304    
-64    336    
48     -48    
-112   96     
0      -112   
-32    16     
64     -32    
112    96     
16     320    
336    288    
-32    112    
64     48     
16     80     
-112   96     
112    48     
96     96     
-144   -224   
128    -288   
-80    -192   
80     80     
-96    48     
-64    64     
496    528    
-432   160    
112    96     
-256   -64    
0      -112   
-144   -32    
80     -144   
160    96     
-32    0      
-368   -16    
80     48     
-176   -16    
160    112    
-160   48     
-16    -80    
128    64     
112    208    
0      -96    
-80    -48    
736    608    
-880   16     
208    96     
-144   208    
32     -64    
96     192    
-160   48     
64     176    
-96    -16    
-16    80     
80     -64    
-64    96     
96     64     
64     16     
48     32     
48     48     
128    96     
-64    80     
112    128    
112    32     
32     80     
192    160    
-384   -144   
368    192    
112    128    
192    16     
-80    -32    
320    96     
224    224    
-192   -48    
0      -144   
208    -128   
-16    272    
128    64     
48     48     
96     48     
-112   -64    
0      -192   
176    -720   
272    0      
96     208    
80     96     
96     64     
-48    48     
112    80     
128    96     
16     80     
48     48     
96     128    
32     0      
-64    -80    
48     16     
-160   -48    
128    -16    
16     48     
-80    -96    
32     16     
32     -112   
48     112    
32     160    
160    176    
-80    64     
80     0      
-64    112    
80     80     
-48    48     
32     240    
160    224    
-160   -80    
224    224    
-144   64     
192    320    
-192   112    
112    -48    
64     80     
128    112    
48     48     
-80    32     
80     -240   
-192   64     
256    192    
96     112    
-144   -96    
208    -208   
112    144    
-48    -112   
224    288    
-160   -112   
16     16     
80     64     
80     0      
32     -48    
32     144    
96     -32    
16     96     
128    112    
-96    -336   
160    16     
112    -48    
-96    48     
352    64     
48     112    
-64    -64    
144    64     
-16    -432   
128    112    
96     -32    
0      112    
16     0      
80     272    
-96    32     
112    0      
96     96     
-32    -192   
64     48     
112    -160   
112    144    
64     -672   
16     32     
0      -1248  
272    240    
-64    64     
0      144    
64     16     
32     96     
-80    272    
192    -64    
144    48     
48     -128   
-384   -64    
528    -528   
64     160    
-192   -112   
144    64     
-112   -160   
48     304    
128    176    
-96    0      
0      96     
-16    96     
32     160    
16     -304   
96     112    
80     -208   
-176   192    
208    -64    
-144   32     
112    0      
-80    -256   
64     32     
32     144    
-96    64     
192    144    
-64    96     
64     -176   
-64    336    
128    -176   
32     96     
16     -176   
32     -32    
256    32     
-208   -16    
272    -208   
-48    80     
144    64     
208    288    
-288   256    
32     -240   
-144   -48    
80     -32    
192    -560   
-240   -208   
-224   -1648  
48     -608   
352    272    
-112   -128   
144    304    
-256   -304   
160    -224   
-416   -576   
-48    -480   
224    80     
32     -80    
192    -208   
-160   -64    
-208   16     
240    32     
32     -16    
-48    -48    
-64    -1968  
368    80     
208    208    
-16    96     
160    -288   
-16    32     
-160   -336   
80     16     
256    224    
176    96     
-688   16     
-272   -160   
96     0      
-16    -256   
320    -96    
-96    -496   
-64    0      
-48    -256   
48     -304   
144    -384   
-176   -48    
176    -96    
-160   16     
-80    -32    
32     112    
-80    16     
96     80     
-320   -432   
496    -16    
32     176    
96     16     
64     352    
224    -64    
-48    -112   
80     -192   
128    384    
32     96     
-112   192    
32     320    
48     -176   
-176   256    
-48    -320   
-464   48     
-80    -384   
0      -496   
320    208    
-240   160    
224    -304   
-112   48     
240    -64    
-80    96     
112    48     
64     -16    
-128   -32    
32     -208   
-256   -224   
64     -48    
-224   -32    
16     -80    
-1712  -320   
192    -144   
-16    160    
-32    -560   
0      16     
80     -1184  
96     176    
96     64     
32     48     
-96    32     
112    -96    
-32    -16    
16     192    
80     144    
-16    80     
-1136  80     
64     192    
-16    -112   
0      -144   
112    272    
-48    -576   
128    -48    
-48    80     
16     32     
-80    48     
336    32     
-256   80     
112    -48    
-432   0      
160    -208   
-432   32     
128    -48    
80     96     
0      -128   
48     96     
16     -832   
192    0      
-304   -256   
32     0      
240    176    
0      64     
112    -112   
48     -112   
-256   -224   
144    -192   
-112   32     
64     -224   
352    224    
-96    64     
-64    -80    
208    224    
112    208    
-80    -48    
80     0      
-144   -224   
128    -16    
-128   160    
128    112    
-48    48     
-32    48     
-32    112    
112    16     
32     224    
-1184  -288   
80     128    
-336   144    
-672   816    
-16    112    
-1680  -576   
144    -256   
-48    352    
96     368    
-192   -992   
192    -192   
0      224    
-64    48     
-896   -128   
160    176    
-80    32     
144    -16    
-144   208    
-160   -16    
112    320    
-384   -144   
112    32     
-416   -48    
-112   -80    
48     -112   
-112   128    
240    -192   
-224   304    
32     -400   
-48    -96    
-48    -80    
32     160    
0      -96    
-64    32     
64     128    
-80    128    
224    -112   
-160   16     
-288   -384   
-672   -144   
-112   112    
-64    64     
-32    96     
-80    -16    
352    192    
-256   -160   
224    288    
-512   48     
144    -112   
96     80     
80     96     
-112   160    
-304   0      
96     -32    
-304   -112   
352    464    
-496   -272   
144    80     
80     48     
-80    96     
48     64     
80     -32    
16     144    
160    64     
-224   -48    
128    -16    
16     -16    
-320   0      
96     160    
-80    96     
-96    48     
-944   16     
128    176    
-32    -16    
-32    32     
0      -32    
192    -64    
-80    -80    
80     48     
-112   16     
48     32     
32     80     
80     256    
48     224    
-240   176    
-112   -208   
-112   -400   
256    -80    
-176   -160   
176    96     
-112   128    
-16    -48    
32     176    
128    208    
-208   -16    
-288   0      
224    -112   
-144   128    
-240   0      
-128   -96    
224    32     
-304   48     
-48    112    
-768   224    
-240   0      
16     48     
16     128    
64     128    
-320   80     
208    112    
-272   80     
352    288    
-544   64     
-128   176    
-288   -208   
128    160    
-160   -96    
48     80     
-432   -64    
-32    0      
16     48     
32     192    
144    144    
144    144    
-192   112    
-192   -48    
-256   -16    
96     32     
96     64     
-192   16     
160    48     
-320   -32    
-32    64     
-112   0      
32     -16    
48     160    
96     112    
-96    32     
16     32     
32     64     
-160   -16    
176    176    
-224   96     
192    176    
-192   -80    
-160   -48    
0      -64    
-176   112    
112    48     
80     80     
128    112    
64     64     
-336   -192   
192    -96    
-48    208    
304    496    
-64    48     
-160   0      
304    32     
-160   -64    
48     96     
-128   -16    
176    160    
-96    48     
48     -112   
64     0      
128    320    
-144   112    
-48    -32    
400    336    
-176   256    
-240   -144   
80     -32    
-48    176    
32     0      
208    272    
-80    64     
-48    128    
64     112    
-16    16     
128    208    
-144   0      
-16    240    
80     0      
-128   -320   
192    -80    
-80    128    
-288   64     
144    64     
-96    0      
128    144    
-128   -64    
64     64     
-32    -144   
32     16     
0      48     
-64    144    
112    144    
-208   -160   
96     64     
16     80     
-48    80     
-128   16     
176    -48    
0      -48    
48     -1952  
-80    16     
80     80     
-32    48     
-48    32     
144    48     
16     16     
-112   32     
176    96     
-176   48     
80     16     
-176   32     
272    96     
64     112    
-208   0      
96     -80    
64     176    
-208   -80    
176    0      
16     96     
-144   -16    
160    -64    
144    240    
-304   32     
256    80     
-256   288    
176    352    
32     64     
-176   -176   
288    192    
-48    -320   
80     80     
160    464    
16     80     
80     32     
-80    -64    
176    -48    
144    0      
192    128    
128    48     
96     -256   
208    96     
0      -80    
96     -112   
112    -16    
-64    -208   
176    304    
-112   -272   
-160   -272   
64     -16    
-304   -736   
160    -144   
64     -128   
-48    -304   
224    256    
-32    -32    
32     144    
160    32     
-112   -64    
48     528    
96     0      
80     32     
128    -304   
-16    80     
-48    -304   
64     -80    
176    416    
-80    352    
-128   -528   
240    496    
224    624    
-128   -208   
0      -80    
224    128    
-128   112    
80     -256   
32     544    
-64    -144   
384    432    
-336   -1360  
64     -288   
32     -336   
160    64     
96     16     
48     208    
-304   -400   
-16    512    
-144   -64    
-208   -608   
128    112    
-48    32     
16     160    
-112   -352   
-64    64     
-80    -320   
16     -320   
208    128    
96     384    
16     -64    
0      368    
144    -384   
32     -64    
32     560    
-80    -368   
112    -96    
48     560    
0      -208   
64     -368   
-32    -16    
-32    -416   
496    432    
-192   224    
64     224    
16     -16    
48     48     
0      304    
0      -240   
-48    112    
368    -16    
-208   112    
128    -496   
-48    96     
-32    -224   
-16    -128   
272    224    
160    448    
-64    -688   
480    288    
-336   -272   
-128   -128   
64     -208   
32     -208   
48     -128   
32     -48    
-48    -96    
0      -176   
96     -48    
-176   -432   
16     -192   
208    16     
96     240    
-32    -32    
64     -1904  
208    416    
-224   80     
240    -496   
-128   -32    
288    -368   
80     176    
96     -112   
0      -240   
96     144    
-32    16     
288    96     
32     -32    
-176   96     
80     0      
32     112    
-208   96     
32     16     
64     -512   
-176   -144   
16     -208   
0      -64    
256    -96    
-16    112    
-64    -880   
240    -304   
32     208    
224    176    
-224   -624   
176    -144   
112    208    
-48    48     
-144   -208   
48     -32    
-480   -224   
160    -32    
16     128    
-16    272    
32     -544   
128    48     
-96    -144   
160    -912   
-32    48     
80     192    
144    -48    
-144   -240   
96     256    
-96    -80    
80     -48    
96     80     
192    -224   
-16    -80    
80     -144   
240    640    
-64    -256   
208    -224   
48     -192   
48     576    
160    256    
-112   80     
160    -144   
-64    64     
176    96     
-16    -64    
-112   -80    
32     -208   
-144   -32    
-32    -176   
0      -32    
48     -16    
-144   -16    
160    -656   
-48    192    
496    304    
-272   112    
96     240    
-48    96     
128    48     
-160   -272   
-160   -160   
0      80     
-112   80     
32     -16    
-912   0      
96     -144   
-144   16     
192    -368   
-176   64     
144    -400   
-64    96     
-96    32     
32     -32    
16     48     
32     -64    
80     -48    
-80    -48    
288    128    
-208   -176   
-208   32     
48     -64    
32     -32    
-48    -384   
320    -48    
-16    -448   
192    112    
-32    -160   
-160   64     
432    -160   
-416   -64    
144    -16    
-48    -48    
-304   64     
-48    -96    
-352   64     
-128   -80    
-48    -288   
192    -512   
-240   -160   
384    -336   
-192   -64    
-32    -48    
64     128    
80     32     
-64    96     
-144   48     
-128   32     
-416   -80    
-144   -80    
-432   128    
240    128    
80     192    
176    -176   
-48    176    
-112   -224   
272    0      
80     336    
-64    256    
-80    96     
80     -48    
16     0      
-32    -48    
-224   -48    
-48    -288   
-208   -112   
-720   -112   
-160   -80    
-496   -240   
-16    224    
112    -16    
-192   -32    
-176   -144   
-928   -192   
-160   0      
-192   -32    
-112   48     
32     -144   
32     -336   
304    -16    
64     176    
-752   -144   
0      48     
48     -128   
112    80     
16     48     
-160   -48    
48     0      
-96    0      
16     48     
208    96     
-48    80     
176    48     
64     -16    
-352   -240   
272    -32    
-32    -64    
32     -176   
64     112    
80     80     
-64    80     
-112   -80    
0      -16    
-160   -48    
80     48     
-64    48     
0      -16    
-128   -32    
-176   -192   
-416   32     
64     128    
-144   -64    
112    128    
16     16     
112    48     
-224   -80    
-112   -32    
128    48     
-208   0      
64     64     
-256   -64    
16     32     
-144   -64    
-80    -32    
-96    -16    
96     48     
-320   -800   
160    -32    
-16    128    
-16    128    
-96    32     
-64    48     
-48    64     
-176   -48    
144    160    
-128   48     
-64    -80    
-16    -224   
176    128    
-1056  48     
16     32     
-208   -304   
80     96     
-112   0      
144    96     
80     -48    
-176   -128   
48     144    
-256   96     
32     112    
16     176    
-16    96     
-464   -144   
96     48     
-128   64     
-32    -96    
48     96     
-64    16     
16     192    
-32    48     
-48    48     
16     144    
-208   0      
112    -144   
208    -64    
-48    -16    
-96    32     
128    192    
-128   240    
-400   -512   
288    -656   
-624   16     
-112   -192   
-32    -64    
32     0      
-112   -16    
160    32     
-16    -112   
96     -48    
16     -176   
-160   32     
48     -16    
-192   -48    
208    16     
-144   48     
32     48     
16     112    
256    656    
-32    224    
-32    -208   
48     -112   
-16    -32    
112    48     
144    224    
-176   -80    
-16    -80    
16     32     
-128   32     
144    704    
-192   -256   
304    912    
-320   -336   
-224   -400   
-128   320    
-384   -848   
80     336    
-48    240    
-32    144    
-208   -48    
-48    80     
-96    -80    
128    48     
-144   320    
0      -304   
-224   -272   
368    224    
-288   528    
208    -288   
-80    272    
96     -64    
-48    80     
-96    -320   
224    0      
-32    336    
-64    -592   
80     368    
128    -192   
48     128    
-16    144    
-16    -192   
64     224    
64     160    
16     16     
-160   -80    
320    0      
-80    -144   
-176   -176   
64     -80    
192    64     
48     160    
-224   -240   
576    192    
16     848    
16     208    
0      -48    
64     304    
96     768    
0      -112   
-160   -656   
64     -64    
128    240    
-80    512    
128    -64    
-352   192    
32     80     
-192   -96    
192    -48    
-208   -256   
48     192    
240    32     
-160   -112   
-32    -224   
320    -448   
-352   320    
384    432    
-144   640    
16     -528   
16     128    
-96    -32    
176    224    
0      464    
144    -32    
-96    384    
-48    -720   
448    416    
-368   112    
0      -288   
48     64     
96     0      
144    -16    
96     -64    
288    224    
176    160    
-16    -80    
-208   128    
304    -208   
80     512    
-80    -96    
224    -576   
128    320    
-16    -32    
96     -128   
208    32     
48     112    
128    48     
-80    64     
96     48     
16     64     
16     64     
112    96     
-16    128    
48     -192   
160    368    
-64    -272   
64     -672   
288    -896   
464    608    
-384   656    
-128   -1168  
272    -112   
-112   576    
288    768    
64     -432   
-288   -48    
624    864    
-448   192    
144    -128   
176    -64    
-112   -16    
128    208    
16     -1296  
-32    -272   
-16    0      
176    384    
160    128    
-64    448    
-48    16     
64     112    
-208   112    
64     -160   
16     352    
-112   -64    
-80    48     
64     -240   
80     32     
0      -160   
80     112    
48     -1904  
32     80     
-112   0      
-64    -528   
176    -80    
240    112    
-96    368    
208    0      
16     144    
0      720    
-32    416    
224    272    
-144   320    
-128   -432   
208    336    
304    416    
-288   160    
288    -1360  
-144   80     
-16    160    
224    96     
-64    -64    
128    192    
256    288    
-256   -48    
48     192    
48     -224   
-96    -48    
48     -48    
112    64     
96     -656   
112    144    
48     32     
80     160    
160    144    
32     80     
-112   176    
96     48     
-80    48     
256    -160   
32     112    
0      -144   
96     128    
192    -272   
64     80     
112    -144   
80     144    
-16    -176   
48     144    
144    48     
-288   64     
144    -160   
128    -80    
64     80     
-400   -64    
400    -32    
48     -256   
128    112    
32     -96    
-96    48     
112    96     
-96    416    
176    192    
64     16     
48     -176   
160    -1232  
80     96     
80     16     
48     -1408  
-32    -80    
64     -2000  
32     -128   
96     64     
80     -32    
-16    32     
240    -176   
128    -1120  
48     272    
240    192    
-96    -64    
144    -304   
160    -112   
96     -304   
160    -1360  
-128   -448   
224    -1536  
-80    -96    
80     -880   
96     -96    
-96    128    
48     -160   
-128   -512   
304    192    
-192   -256   
176    64     
-176   240    
64     416    
-208   912    
208    512    
-192   -16    
-80    -96    
112    -16    
208    -224   
32     -272   
192    -64    
208    -288   
288    -112   
192    128    
112    0      
240    -80    
0      -192   
96     -288   
-48    0      
192    128    
-80    -80    
32     -384   
-176   -128   
80     -656   
16     160    
208    -608   
-48    -80    
64     0      
160    96     
-176   -192   
48     -256   
144    80     
-144   -128   
-592   112    
336    -128   
-80    -32    
192    -80    
-160   -16    
128    -160   
-144   32     
-96    -224   
208    128    
64     -128   
80     64     
64     -32    
0      48     
64     0      
-16    32     
-256   80     
112    -192   
-304   -96    
48     32     
176    -48    
112    32     
144    48     
128    -336   
-16    16     
-48    -352   
224    -48    
112    0      
112    32     
368    368    
-352   80     
-48    -80    
0      0      
0      0      
-16    -48    
0      64     
112    -160   
-128   -112   
48     -352   
48     48     
128    -784   
32     64     
-80    112    
16     -144   
-272   -16    
-16    0      
-320   112    
112    -16    
-432   -32    
-16    -64    
-192   -128   
80     -128   
-16    48     
32     -160   
80     96     
144    -512   
-112   -144   
-176   -176   
176    0      
-272   80     
80     -16    
-64    48     
96     -96    
-96    64     
176    -64    
-528   -128   
192    -112   
0      -80    
16     -32    
96     96     
-80    -16    
176    -64    
-288   -80    
-144   -112   
224    80     
-16    -48    
-192   -80    
176    -160   
-288   -112   
240    160    
192    640    
-48    224    
160    320    
-784   -80    
-16    0      
32     -80    
-48    304    
-64    160    
144    96     
-32    96     
-48    -192   
-32    16     
160    -96    
32     272    
-32    -64    
-128   -96    
-800   -16    
-16    80     
-320   -512   
16     112    
-368   -688   
192    320    
-208   -128   
-192   -512   
-320   352    
-64    0      
-32    384    
48     224    
-96    -240   
-208   -208   
-112   224    
-320   -160   
160    48     
-336   64     
32     16     
-48    48     
64     0      
-64    -16    
-480   -368   
80     96     
-48    64     
112    144    
-960   0      
-16    16     
-80    -96    
208    96     
-160   -128   
128    -256   
112    0      
-128   336    
112    -16    
-128   80     
48     128    
-48    -80    
-16    -64    
256    96     
-416   -192   
96     32     
-544   112    
-96    -176   
-16    -16    
48     -96    
48     176    
-192   128    
0      384    
288    80     
-192   176    
304    -80    
-368   -208   
64     480    
-64    -32    
-208   -32    
-128   64     
-32    -16    
320    -80    
48     -64    
-64    144    
-80    352    
-32    16     
-96    -64    
-16    224    
-272   -192   
96     -48    
-288   -32    
128    16     
-352   -176   
64     -48    
-368   -96    
32     -528   
-816   -256   
0      96     
352    -48    
80     176    
-112   176    
-16    -272   
-16    -224   
-144   -80    
192    384    
-160   336    
32     -48    
-144   0      
96     -16    
-48    -272   
-48    -144   
-576   80     
-32    -384   
80     -304   
32     144    
32     0      
-304   336    
176    -160   
-176   176    
-144   -64    
112    208    
-80    32     
112    -240   
176    176    
-176   512    
144    768    
-224   -464   
80     0      
-80    64     
112    -80    
-288   -160   
144    -160   
-144   208    
-112   -288   
-320   -368   
-256   -1104  
608    1168   
-592   144    
176    -496   
-64    464    
176    96     
-192   240    
112    192    
48     -16    
-176   640    
-48    -608   
48     80     
-208   -112   
128    144    
-96    192    
144    -384   
-176   160    
-64    144    
208    400    
-128   0      
32     144    
-160   208    
0      304    
144    128    
-112   112    
112    288    
16     368    
128    448    
16     -128   
80     64     
144    528    
-112   -96    
-96    -112   
0      208    
48     48     
96     320    
48     256    
-352   -656   
144    -64    
96     144    
0      128    
96     192    
112    320    
-48    112    
32     32     
32     32     
176    192    
-320   32     
128    288    
-48    160    
-48    192    
192    -32    
-64    96     
-32    112    
64     32     
16     0      
-16    0      
304    224    
-256   16     
272    192    
-416   144    
96     64     
-96    -64    
144    176    
-80    208    
0      336    
96     64     
-48    0      
272    48     
-336   16     
96     80     
-128   80     
64     144    
-96    -48    
48     48     
-256   -336   
32     -48    
-32    96     
0      128    
-160   -48    
208    -48    
-64    96     
48     96     
-32    128    
48     -16    
-16    128    
16     -368   
64     -160   
64     144    
-176   352    
-32    0      
160    -48    
-32    96     
192    96     
-192   32     
32     -768   
128    160    
-256   96     
160    64     
-16    32     
128    -16    
-112   48     
160    64     
-80    48     
64     64     
-16    32     
288    256    
-256   160    
64     80     
128    -32    
0      -928   
80     144    
160    192    
64     80     
304    224    
-80    240    
32     176    
32     -80    
-16    -128   
96     0      
-64    -96    
176    32     
48     0      
304    288    
0      256    
-32    -64    
192    -32    
336    -528   
-128   144    
-80    192    
-96    256    
288    384    
-192   272    
64     32     
176    32     
-96    -128   
144    0      
-64    -192   
272    128    
-144   -16    
-48    0      
64     160    
-112   -1072  
0      64     
-96    16     
320    -16    
-208   -16    
144    32     
-96    -208   
208    176    
-336   -32    
112    144    
-96    -32    
16     -64    
-32    64     
48     -176   
368    208    
0      -576   
128    128    
128    -256   
400    272    
-224   -16    
384    96     
-48    -16    
0      48     
-80    64     
240    16     
-80    -192   
112    -176   
48     96     
224    144    
80     144    
-128   -80    
224    176    
-112   -400   
192    -16    
-48    -672   
96     64     
16     32     
-32    176    
112    32     
-32    96     
80     96     
64     -144   
-176   144    
32     -800   
-80    16     
128    -96    
128    48     
-288   -368   
112    48     
-112   48     
128    144    
0      48     
96     48     
0      -48    
64     160    
16     112    
48     -16    
-112   64     
352    -16    
-128   128    
80     -112   
32     80     
112    -288   
16     160    
-16    -128   
-144   32     
64     -32    
144    128    
-32    0      
-32    -96    
96     -32    
-64    -96    
224    80     
48     -32    
112    144    
-48    -128   
112    -80    
32     -16    
32     112    
-16    -96    
32     -672   
-64    -128   
160    176    
-144   -1280  
32     -16    
160    -320   
16     -208   
-128   -2432  
144    -288   
288    416    
-32    192    
-128   144    
112    64     
-160   -544   
48     80     
-16    -112   
80     128    
144    -80    
16     48     
0      -16    
48     -160   
96     0      
-64    -112   
208    -16    
0      -720   
-304   -976   
416    592    
-192   336    
96     -992   
96     224    
64     48     
160    -80    
-32    80     
64     -272   
48     -96    
80     -336   
96     48     
48     -304   
32     48     
48     -400   
48     -32    
-176   -848   
240    -128   
16     288    
0      -160   
64     640    
48     -224   
-256   -32    
-48    -48    
-240   -192   
-80    64     
112    -48    
16     128    
-80    -288   
240    -416   
-320   -288   
256    -624   
-64    576    
272    240    
-64    160    
-16    -64    
208    80     
-112   0      
128    -32    
-240   -96    
256    -48    
-912   272    
32     -352   
32     -256   
32     -272   
-32    -64    
128    -16    
192    0      
32     304    
48     -16    
0      48     
112    80     
-256   -256   
96     -176   
-144   0      
224    -64    
-464   80     
80     -96    
-240   -80    
304    160    
-272   32     
320    -464   
-48    96     
224    -1344  
-112   80     
112    16     
-48    80     
0      0      
608    416    
-464   592    
16     16     
-160   -64    
144    112    
-144   32     
80     -192   
-160   -256   
96     -560   
-128   -16    
-48    -1008  
352    32     
-112   224    
112    112    
-16    64     
-144   -96    
-96    -16    
-112   -160   
192    -192   
-80    -144   
-256   -224   
288    -176   
-48    272    
384    32     
176    96     
288    208    
16     64     
-496   -240   
688    -144   
-352   176    
-48    -384   
272    -112   
96     496    
-144   -176   
-96    -128   
-336   144    
-48    -224   
144    -64    
96     -64    
16     192    
192    384    
-64    -96    
-496   -240   
144    16     
-320   176    
160    16     
-224   128    
48     144    
-448   -80    
192    -496   
-208   -192   
624    640    
-304   -96    
-256   -208   
48     304    
-160   -64    
-240   -80    
-32    112    
-208   672    
144    -32    
-176   -144   
32     16     
-16    128    
-48    256    
32     -448   
-160   -288   
128    288    
64     -48    
-352   -416   
96     -720   
48     -512   
80     -176   
80     208    
-400   96     
-16    112    
-1184  368    
96     176    
-32    -160   
-32    112    
96     64     
-112   80     
-144   288    
160    48     
-32    -144   
-64    0      
-80    112    
80     -48    
-272   32     
-192   16     
-144   32     
-624   -32    
-144   80     
-976   256    
-320   224    
-80    -96    
288    160    
-112   64     
-128   64     
-112   -128   
192    -80    
16     -160   
-64    -208   
128    64     
-80    64     
-48    64     
16     0      
16     288    
-288   80     
-352   48     
32     144    
176    432    
-352   176    
-64    96     
32     64     
-176   -32    
96     48     
-80    -96    
80     16     
16     -48    
-16    32     
0      16     
-304   64     
-544   16     
-128   96     
-32    64     
-48    48     
64     32     
80     -16    
-48    112    
32     0      
-96    80     
352    112    
-368   0      
48     48     
-192   16     
-192   -16    
64     112    
-144   -176   
256    80     
-640   112    
-16    -224   
144    -288   
-48    256    
64     0      
-176   48     
224    64     
-144   0      
96     64     
-160   -48    
208    96     
-112   64     
0      32     
96     64     
-80    128    
-432   -192   
16     16     
112    96     
-112   48     
16     112    
-16    16     
32     -32    
64     48     
-64    48     
32     112    
48     80     
-32    64     
-16    96     
-64    160    
96     32     
-224   -112   
208    96     
-64    48     
0      0      
-32    48     
-32    16     
-48    -48    
-80    16     
64     48     
-48    256    
224    80     
-272   -176   
112    16     
-128   -112   
128    144    
16     0      
48     -64    
-80    32     
-48    48     
-16    -32    
-112   -112   
128    -320   
-112   0      
352    -32    
-112   -128   
48     -96    
-240   -240   
48     -112   
-80    -48    
112    208    
16     144    
-96    0      
80     -96    
32     16     
96     160    
-16    80     
176    32     
-16    96     
32     176    
-96    112    
48     0      
-96    96     
-16    128    
-112   -64    
192    96     
-112   64     
96     -32    
-48    96     
80     64     
-64    -32    
144    112    
96     -16    
80     0      
-16    80     
32     64     
32     32     
0      32     
64     -48    
-160   48     
80     176    
64     80     
112    128    
-208   160    
240    80     
-224   80     
80     0      
-32    144    
-144   96     
48     64     
48     64     
-224   -32    
288    -80    
32     144    
16     32     
0      -96    
0      32     
352    208    
16     192    
-48    0      
320    256    
-80    128    
-32    -80    
-16    160    
96     -48    
-80    -80    
128    128    
80     128    
-144   80     
-16    -128   
304    -144   
0      48     
16     112    
-32    32     
32     64     
-16    48     
-144   -96    
192    96     
-80    112    
80     96     
0      -32    
336    304    
-384   48     
32     96     
160    128    
176    -480   
-32    96     
160    -32    
-96    192    
256    272    
-240   256    
32     160    
32     16     
-192   -128   
400    32     
64     128    
208    32     
-288   160    
432    0      
-32    64     
-16    -224   
96     96     
32     96     
160    48     
-32    64     
272    208    
-16    272    
-48    192    
-160   -16    
-48    -480   
32     0      
80     32     
-144   -176   
-176   -288   
48     48     
80     -304   
32     -272   
224    -1472  
-80    0      
16     80     
-48    -32    
-16    -48    
32     -288   
-176   -416   
48     640    
-192   -208   
0      32     
-224   -288   
208    320    
0      192    
32     -112   
160    288    
-64    -1136  
80     144    
48     80     
64     112    
32     0      
160    96     
-208   -192   
320    112    
-240   -544   
112    336    
112    592    
144    176    
-208   176    
368    -80    
-160   16     
16     -240   
80     80     
32     -1504  
80     112    
64     -48    
16     32     
16     0      
64     112    
32     80     
-16    -16    
208    208    
-144   -16    
-16    -176   
-80    -176   
192    128    
16     -112   
32     192    
-32    -416   
-112   -128   
224    -432   
-64    96     
-16    -96    
288    160    
-32    -96    
80     -240   
96     144    
144    -144   
-32    176    
32     -80    
32     32     
112    -48    
0      160    
16     -208   
32     144    
-144   64     
128    224    
32     96     
112    64     
16     32     
-64    -816   
224    -128   
48     64     
240    784    
32     512    
128    240    
-16    160    
384    672    
-144   -16    
192    -16    
-16    48     
112    64     
96     0      
368    448    
-208   464    
48     -192   
192    128    
-16    -176   
112    80     
-96    -272   
144    96     
-64    -160   
-160   -368   
144    -560   
0      448    
192    128    
192    -608   
0      -64    
160    -880   
32     -176   
160    80     
112    -96    
-176   -32    
240    464    
-208   -240   
-256   -624   
336    112    
-96    400    
0      -128   
-64    -1216  
96     -368   
368    -112   
-128   224    
160    -400   
80     -448   
416    368    
48     -240   
80     -32    
80     -448   
80     -96    
48     -1040  
128    384    
144    256    
-160   -160   
32     96     
-128   -1072  
144    -176   
64     128    
-48    16     
112    -160   
-224   208    
-112   -192   
192    -544   
-64    -512   
96     -480   
-16    -464   
48     -176   
0      -528   
-176   96     
-64    32     
-160   64     
192    -32    
-32    -32    
112    -144   
-112   -128   
112    -128   
16     80     
160    -16    
-160   -208   
-80    -304   
176    -96    
-256   -144   
176    128    
-80    160    
16     80     
0      48     
48     -16    
160    -80    
-368   -256   
144    -176   
128    192    
-176   -112   
224    144    
256    -96    
-320   224    
48     -16    
-192   -32    
240    -64    
-16    160    
80     16     
-16    48     
-192   -208   
160    -112   
-112   -368   
96     -160   
-128   0      
48     -128   
-656   -32    
112    -128   
-1232  128    
80     0      
0      -16    
-16    -832   
144    80     
80     -2160  
0      96     
-112   -64    
160    -176   
48     0      
-32    -16    
-32    -16    
-32    -32    
-512   -80    
384    192    
-784   32     
64     -112   
0      128    
0      -192   
-160   32     
128    -336   
272    176    
0      -80    
32     0      
-640   -112   
-80    -160   
112    96     
-64    -48    
16     64     
112    80     
-400   0      
16     -224   
112    -64    
112    -112   
80     112    
80     -416   
32     -16    
-400   -80    
16     -96    
-64    32     
48     16     
176    192    
-144   16     
16     80     
208    208    
-672   32     
144    -272   
16     112    
112    -64    
64     64     
-192   -80    
-240   0      
176    304    
-512   80     
192    32     
-112   32     
48     32     
48     48     
-128   -48    
128    -80    
-32    80     
-256   64     
80     96     
-560   -64    
128    48     
-112   288    
96     -48    
-32    -16    
-32    96     
112    96     
-64    -112   
96     48     
80     -16    
-336   -384   
-32    -128   
48     48     
-240   0      
0      16     
-112   -208   
-128   48     
-16    272    
-96    0      
0      0      
64     176    
-272   -144   
-1024  -32    
-96    0      
-160   -64    
0      16     
-48    -48    
32     0      
-416   176    
304    112    
-144   -416   
-80    160    
-64    -16    
-144   32     
96     32     
-32    -32    
-64    -16    
-80    48     
-80    -32    
-160   208    
-272   96     
224    96     
-304   96     
80     -96    
0      -48    
144    16     
-48    96     
-192   32     
96     32     
-304   -80    
48     -112   
128    240    
-48    112    
64     16     
-240   -16    
-32    144    
-112   -144   
-80    -16    
160    64     
-160   -208   
80     48     
-128   112    
-192   -32    
0      48     
48     96     
-32    32     
-48    32     
-240   -144   
-16    -16    
-704   -144   
80     -96    
-1392  64     
144    112    
-80    16     
-16    16     
-176   -32    
176    128    
48     64     
32     16     
-16    160    
80     96     
-48    0      
-64    48     
0      32     
-80    -32    
112    144    
-176   -32    
80     144    
-112   -160   
-16    -16    
-64    -400   
-288   -480   
272    96     
-336   96     
48     -48    
-96    -112   
96     128    
16     320    
-48    160    
-160   -64    
112    112    
112    48     
-368   -144   
16     -320   
-96    96     
352    272    
128    64     
-128   -64    
0      80     
-32    -32    
-96    -160   
64     64     
96     128    
-112   128    
-176   -144   
128    -16    
-16    16     
160    160    
-80    48     
128    32     
112    640    
368    352    
-432   112    
64     96     
64     32     
96     96     
-32    272    
-176   192    
-16    208    
112    64     
-64    16     
80     -160   
96     -432   
-64    -224   
80     48     
112    208    
32     160    
-64    128    
-208   16     
-48    16     
-48    -32    
-64    0      
16     64     
80     400    
-80    -208   
32     208    
80     224    
-400   -272   
304    -816   
80     336    
0      208    
368    0      
-144   96     
128    64     
-64    32     
80     400    
-32    -176   
144    400    
112    544    
-208   -368   
160    256    
-32    240    
80     160    
64     -96    
0      -32    
32     0      
-256   -192   
32     -384   
-160   -48    
-80    -144   
32     32     
32     192    
0      64     
-16    304    
160    16     
-288   144    
160    -16    
-176   0      
160    272    
288    224    
-128   64     
16     0      
96     32     
-48    16     
96     128    
48     64     
80     96     
-128   -32    
0      80     
32     0      
-112   64     
64     64     
48     64     
48     80     
32     80     
-240   96     
224    -32    
-128   64     
0      -256   
-128   -224   
96     112    
-16    384    
144    192    
-32    160    
-128   -160   
176    -688   
16     32     
-16    16     
-128   -96    
240    -112   
-80    112    
-32    96     
16     -16    
64     112    
96     80     
32     64     
16     96     
160    80     
-80    0      
320    192    
0      160    
96     80     
-64    16     
224    80     
-64    64     
112    80     
16     -128   
-32    -160   
512    576    
-112   992    
-48    432    
-32    288    
-32    -48    
0      -16    
48     16     
-48    -528   
96     -32    
-112   -656   
192    -160   
64     -16    
64     112    
16     112    
-32    128    
64     32     
-64    160    
80     16     
192    272    
-464   240    
128    -640   
240    64     
48     896    
-144   -240   
304    -1040  
-32    720    
-64    -272   
288    192    
96     704    
-384   -176   
16     -448   
16     80     
80     144    
16     -16    
128    432    
32     64     
-48    32     
80     0      
128    32     
176    -96    
-80    368    
64     560    
-128   368    
80     -128   
-32    -48    
-176   -272   
0      -400   
-16    -256   
176    0      
-16    80     
160    -112   
-336   -64    
432    -160   
80     128    
160    -288   
-16    192    
-64    -304   
176    80     
80     96     
112    0      
-576   224    
448    224    
-160   0      
192    48     
-32    64     
224    -96    
80     80     
128    -272   
144    112    
-304   -272   
640    32     
-192   160    
272    80     
-144   32     
192    112    
-112   112    
-16    128    
-224   48     
512    -224   
-64    272    
224    -720   
-192   80     
352    144    
-144   16     
-48    -80    
192    176    
96     -208   
-288   176    
192    0      
208    336    
-32    -16    
-48    96     
176    32     
-48    -240   
-48    64     
32     -256   
416    176    
-32    -64    
80     32     
32     -64    
-16    -64    
-32    -256   
64     48     
-192   -176   
80     -128   
-128   144    
160    -848   
0      -592   
-32    -240   
128    -672   
32     16     
48     48     
32     -112   
64     64     
96     -64    
0      32     
-48    -112   
288    -96    
-64    176    
80     -752   
-160   32     
48     -720   
96     -544   
48     32     
64     -48    
-128   -96    
160    -656   
0      -144   
192    48     
144    16     
0      80     
144    96     
192    32     
-64    48     
144    -144   
-32    48     
-576   -208   
192    -16    
-112   -16    
-48    -224   
96     -96    
0      -192   
32     -16    
272    -592   
16     -96    
128    -192   
48     -48    
112    -64    
-48    -80    
144    -320   
-32    160    
144    48     
-16    80     
80     -64    
64     -32    
176    0      
112    48     
64     32     
176    240    
224    -32    
-208   -400   
-16    32     
64     32     
16     -80    
64     -272   
-96    -336   
256    16     
-112   -32    
-128   -16    
192    80     
-208   64     
-32    -16    
144    32     
-32    -96    
-96    -112   
-96    176    
176    144    
-144   80     
224    -16    
-192   -80    
48     -176   
-80    -48    
64     -96    
-320   32     
32     -160   
-432   -288   
208    -112   
96     -48    
-16    -240   
0      -144   
80     -336   
64     96     
0      -48    
-16    80     
0      64     
-48    80     
-160   -48    
64     0      
-224   464    
128    16     
-1632  -96    
240    -144   
-1136  -32    
192    16     
-48    -16    
144    -96    
64     48     
-48    -448   
128    -128   
-128   128    
96     16     
-48    112    
176    16     
176    96     
-112   -160   
-32    64     
208    -80    
-496   0      
304    -256   
-128   64     
96     -384   
-16    32     
0      -432   
272    -96    
-432   16     
32     -16    
-128   -48    
32     -208   
-128   -112   
208    48     
-64    144    
-64    -16    
64     -48    
192    -288   
64     112    
-16    -288   
336    144    
-144   32     
208    32     
-288   -176   
224    16     
144    -80    
240    -192   
-112   192    
64     192    
112    192    
64     16     
-368   -224   
-32    -448   
256    240    
-768   -16    
64     128    
-160   -32    
128    16     
112    144    
-64    48     
0      112    
128    32     
32     528    
496    816    
-272   240    
-16    -400   
16     -48    
288    0      
144    192    
-256   -80    
192    544    
-144   400    
-272   -32    
0      480    
-112   160    
-176   80     
-1648  -208   
208    -96    
-96    -272   
192    -688   
-560   -384   
64     -144   
176    -32    
16     176    
-192   -304   
-224   -32    
144    144    
32     -80    
192    208    
-32    160    
16     192    
-320   16     
-16    80     
144    16     
-96    -80    
-160   -192   
400    640    
-496   -208   
-64    -416   
272    592    
-240   384    
176    -400   
32     128    
-32    224    
-192   -208   
-144   0      
-112   16     
0      272    
-816   -160   
128    -288   
32     144    
-128   -64    
0      -352   
160    432    
-64    16     
144    -128   
256    160    
-192   32     
-176   48     
160    32     
-208   -96    
-32    112    
160    80     
-816   -96    
16     16     
-128   -80    
64     192    
-96    16     
-64    96     
-176   -256   
160    -400   
-144   64     
-16    -16    
80     -64    
0      -192   
32     -240   
-208   -80    
-256   -608   
-64    -144   
176    256    
-112   384    
-32    656    
-144   16     
-16    -32    
-16    304    
16     288    
16     64     
48     -16    
-96    -16    
-128   -96    
-32    -320   
-144   -208   
144    96     
-256   16     
208    -48    
-960   48     
352    160    
-112   48     
-96    48     
-16    0      
0      64     
64     64     
-16    64     
-32    0      
-176   -80    
0      32     
-224   -32    
144    160    
-176   -144   
48     -16    
-496   -128   
32     -320   
-16    -128   
-48    96     
32     0      
144    128    
32     320    
208    448    
32     288    
-368   -160   
496    160    
-208   256    
96     208    
-240   -48    
48     -16    
-144   -64    
-80    -96    
224    -192   
48     176    
176    -16    
32     400    
-48    288    
192    112    
-80    400    
112    -128   
-64    112    
-160   -144   
192    32     
-448   -160   
432    928    
0      864    
-464   -608   
128    -64    
-48    240    
-160   -176   
192    -80    
-32    208    
32     320    
32     48     
368    576    
-352   -480   
-160   192    
160    176    
0      -80    
128    192    
48     80     
128    208    
-64    -96    
32     -64    
64     48     
64     224    
144    176    
-144   -224   
128    64     
-48    128    
-32    48     
-160   96     
80     16     
-112   16     
-64    96     
-32    96     
-64    48     
32     48     
64     160    
16     0      
96     16     
80     160    
64     96     
16     80     
-80    -224   
-32    208    
-32    -112   
16     -80    
-64    16     
64     80     
-64    80     
-32    112    
128    192    
-48    176    
-64    -16    
64     -160   
128    224    
-80    80     
-48    80     
-16    16     
96     144    
-16    64     
80     144    
-112   -160   
16     -320   
-224   0      
288    48     
0      176    
192    80     
-144   48     
144    256    
96     208    
176    144    
-112   176    
48     96     
-32    208    
96     128    
128    64     
80     48     
176    -304   
80     144    
80     144    
-48    128    
0      -16    
176    256    
-224   -16    
80     112    
-144   80     
-48    32     
80     80     
256    192    
-96    144    
208    320    
-128   16     
48     -1152  
320    -208   
304    -368   
-192   -144   
112    96     
-16    16     
32     96     
-32    64     
32     128    
112    144    
-16    80     
176    80     
-128   144    
192    48     
-288   96     
80     -1184  
-48    288    
192    -992   
-48    240    
64     176    
16     144    
-16    -48    
128    32     
0      -48    
144    160    
-144   96     
96     48     
80     64     
-96    -112   
-16    -128   
320    -272   
144    144    
144    -128   
0      128    
112    48     
-96    32     
256    -304   
32     48     
-16    144    
176    -80    
-192   0      
224    160    
-144   48     
48     -80    
128    80     
160    -48    
288    368    
-352   -480   
112    -160   
32     -2160  
160    80     
112    16     
-32    0      
160    -32    
-32    144    
-64    0      
-32    0      
80     176    
0      -112   
176    48     
-48    -112   
192    368    
0      -160   
-80    -48    
144    -256   
144    80     
16     -16    
144    48     
-128   -48    
224    -96    
208    240    
-16    80     
16     144    
128    16     
0      64     
192    160    
-16    -96    
96     -160   
192    144    
-112   -288   
224    80     
0      96     
-48    160    
-16    16     
16     0      
176    0      
-96    -384   
64     64     
96     -384   
96     80     
208    -144   
32     112    
0      -112   
144    32     
-16    -416   
48     80     
-32    48     
96     112    
48     48     
-16    64     
48     -48    
-48    -160   
0      -48    
0      -16    
0      64     
176    32     
-80    64     
-32    -160   
96     0      
96     -240   
112    0      
0      0      
128    -800   
-48    48     
0      -1440  
0      -720   
-16    -128   
48     -272   
112    96     
160    -528   
-176   -112   
272    0      
416    320    
-224   -64    
48     -160   
48     176    
32     240    
112    -128   
80     160    
-528   -80    
48     -352   
64     0      
96     -32    
64     -48    
-80    -1584  
112    48     
64     160    
-144   -160   
96     -80    
-128   -16    
528    16     
-192   192    
256    -288   
96     -32    
-192   -160   
144    128    
-304   64     
48     -112   
-32    -96    
160    -224   
48     -208   
224    688    
-64    -256   
-128   -640   
560    864    
-368   -64    
80     -96    
-160   -128   
128    -224   
128    192    
0      64     
-864   -16    
96     -224   
128    96     
-16    -240   
32     -224   
224    0      
192    80     
16     -1888  
-112   320    
176    32     
-96    144    
16     144    
64     32     
-192   32     
224    -528   
-384   -32    
320    304    
-544   64     
208    -224   
-144   48     
64     -144   
-96    -112   
16     -960   
128    -16    
-256   144    
144    -80    
-128   48     
32     0      
-256   -400   
32     96     
128    0      
-64    -176   
-688   32     
-80    -480   
-160   480    
208    176    
16     272    
-272   -288   
-64    -160   
-32    528    
-32    -208   
-64    160    
-32    112    
64     -160   
224    288    
-288   80     
-176   -768   
-48    528    
240    384    
-400   -432   
-64    16     
-16    64     
80     -384   
-16    -48    
528    64     
-32    400    
16     192    
16     -96    
-240   464    
80     80     
-752   -464   
-64    -656   
-240   -272   
48     80     
0      64     
-176   -160   
288    112    
112    -192   
-288   112    
336    -704   
-32    32     
80     64     
160    224    
-352   -32    
-112   -112   
-96    -288   
-32    -64    
96     704    
80     336    
-128   -272   
64     -192   
-16    -80    
-16    -288   
208    96     
-16    64     
-48    -64    
-80    -112   
304    336    
-160   224    
80     0      
80     -16    
-64    80     
64     -208   
128    -160   
-352   96     
-672   -720   
-192   -464   
32     544    
128    928    
-80    352    
-464   144    
64     -144   
-800   16     
-144   -96    
0      64     
80     0      
-96    -32    
-96    0      
-64    -224   
48     80     
-208   -48    
48     96     
-448   -160   
112    64     
-416   -80    
160    512    
-144   -32    
-208   -368   
64     240    
-224   240    
-32    48     
144    -112   
-272   -144   
-64    -352   
-32    336    
0      -48    
160    48     
0      224    
0      -112   
-64    -16    
0      48     
160    -16    
-320   -160   
160    304    
-784   256    
128    192    
-416   64     
16     48     
-48    64     
64     -32    
-192   -272   
-16    -128   
0      64     
208    384    
-208   352    
-112   512    
-32    112    
-96    240    
-48    -16    
-624   -80    
80     0      
-672   208    
-32    320    
-240   -64    
-64    128    
48     -224   
128    512    
128    224    
64     112    
-48    48     
-48    32     
0      96     
-192   64     
-128   64     
176    64     
-176   32     
-176   80     
48     160    
-768   -32    
-16    112    
-144   -80    
64     48     
-32    112    
-208   -32    
-32    0      
-144   32     
176    -16    
96     -48    
-64    112    
112    0      
-112   64     
-336   -64    
-32    16     
-1040  -64    
-144   64     
64     128    
-64    -80    
-336   32     
160    -80    
-208   16     
192    64     
-64    0      
48     64     
80     176    
-112   112    
16     32     
-224   64     
-64    48     
-400   -16    
128    128    
-16    80     
-64    32     
-112   80     
-128   160    
112    144    
-176   -128   
384    208    
-128   672    
-48    496    
48     336    
-272   0      
-128   -224   
-96    -272   
-128   0      
-16    304    
32     -16    
48     -112   
-80    128    
-64    128    
144    160    
0      -176   
176    64     
48     -64    
192    160    
80     -112   
160    80     
32     32     
160    224    
-256   -128   
-16    -16    
80     144    
16     64     
-112   -16    
416    144    
-48    80     
-400   -48    
64     288    
224    320    
-32    240    
-448   -192   
240    -96    
-224   -144   
64     0      
64     32     
160    32     
0      128    
48     48     
64     224    
-112   48     
112    48     
224    16     
-96    0      
160    -96    
128    240    
96     -16    
80     64     
-48    -208   
48     240    
272    112    
-160   -16    
96     -32    
96     64     
-32    80     
16     64     
-48    -80    
336    32     
64     80     
0      0      
32     144    
-16    16     
-80    -224   
-176   -176   
32     -128   
0      112    
176    192    
-16    32     
192    112    
-80    0      
144    144    
192    16     
-144   0      
64     -16    
-192   -80    
80     96     
64     64     
112    432    
16     0      
-176   -64    
256    96     
-16    64     
-96    64     
144    224    
-16    96     
-32    64     
48     128    
-80    64     
48     224    
16     144    
48     16     
64     0      
192    48     
176    96     
-32    -96    
-144   32     
240    -112   
16     32     
64     128    
-112   32     
112    64     
80     96     
-16    240    
224    -16    
-176   -16    
288    128    
-208   -112   
0      -96    
112    -48    
48     -1232  
-16    64     
16     112    
96     96     
-64    176    
176    240    
192    352    
16     80     
16     64     
160    64     
-96    -128   
304    560    
-80    112    
-112   -48    
-64    -192   
-16    -752   
-112   -176   
80     -160   
-32    -16    
80     128    
16     64     
64     0      
32     16     
32     192    
80     240    
-64    192    
-16    352    
16     352    
112    352    
-96    -144   
-128   -288   
144    32     
-160   -752   
128    176    
-48    0      
96     -208   
112    16     
112    304    
-144   -64    
32     -352   
160    -32    
48     384    
240    176    
-320   -240   
80     16     
-96    -624   
256    432    
16     -896   
208    384    
16     0      
-16    32     
-32    -176   
0      160    
48     128    
96     176    
-48    208    
-32    288    
128    224    
0      -464   
128    192    
0      16     
96     192    
160    192    
-224   -256   
-160   -1184  
-16    -464   
32     -208   
400    -48    
176    608    
208    96     
128    -80    
160    144    
-32    96     
-16    -160   
192    512    
-128   -128   
-48    -176   
80     -16    
48     80     
80     -192   
320    336    
-64    304    
144    176    
-256   -160   
-96    -112   
-304   -16    
192    48     
-96    192    
-96    -96    
320    48     
-160   -480   
-160   112    
80     -160   
48     -160   
-80    -48    
-32    -304   
240    -64    
256    528    
144    224    
-32    128    
112    48     
-208   -80    
224    48     
-128   16     
128    64     
-32    -160   
160    96     
-96    576    
432    -528   
-80    -816   
64     -160   
-80    -112   
304    272    
128    192    
-160   496    
-224   -1232  
416    -224   
-144   -96    
64     -272   
224    160    
-304   -96    
0      -272   
592    656    
-528   -352   
-16    -688   
336    -752   
240    608    
432    -16    
-352   -112   
-736   -208   
432    -432   
-128   -32    
480    -1408  
-352   -160   
688    -784   
-400   -288   
848    368    
-720   80     
-16    -1152  
208    384    
-48    -176   
-368   -768   
368    -288   
32     816    
-192   0      
-176   -192   
368    -192   
-288   -32    
544    32     
-272   -144   
224    -112   
48     -592   
-96    128    
64     -192   
-32    240    
-64    -624   
-128   160    
272    -128   
-240   208    
288    -80    
80     320    
-304   48     
32     -576   
96     64     
64     -400   
-176   -96    
288    -240   
-160   -176   
80     144    
-64    32     
96     32     
-80    112    
384    448    
-224   656    
-144   -512   
224    -96    
-1392  224    
112    -448   
176    -272   
16     80     
112    -32    
176    32     
-16    -16    
112    -2560  
-160   48     
80     -48    
32     96     
16     48     
32     -16    
-208   -16    
80     0      
-432   -128   
-96    -32    
-1056  176    
144    32     
-224   128    
80     -512   
-128   -144   
144    -1552  
-32    64     
320    112    
-160   64     
-48    80     
208    -128   
-128   -80    
432    304    
-560   96     
-16    80     
160    80     
96     -144   
0      -32    
-16    -368   
64     112    
0      -448   
32     64     
288    176    
-160   -32    
-128   64     
112    -224   
16     -48    
16     -80    
-208   -16    
304    16     
-400   -112   
64     -96    
32     0      
96     -336   
32     144    
64     -224   
-96    80     
192    -1520  
0      192    
-64    64     
-256   0      
352    48     
-240   -128   
160    -240   
-16    32     
-192   -16    
64     0      
176    32     
-16    -80    
64     96     
288    -64    
-16    160    
16     160    
128    -16    
208    64     
0      0      
-128   0      
160    16     
32     48     
16     -128   
64     80     
112    128    
-416   32     
272    -96    
-128   96     
-48    -336   
80     80     
16     64     
-400   144    
-288   144    
0      80     
-96    272    
-64    -32    
0      112    
-80    -80    
-112   32     
112    -160   
-96    80     
-1296  -112   
368    576    
-672   -352   
-208   -80    
64     -16    
-416   96     
-64    -32    
-496   112    
192    -80    
-16    64     
0      32     
-128   96     
-64    32     
-368   -48    
48     -64    
-16    -352   
16     -224   
-192   -416   
-288   -144   
-160   -96    
-160   -48    
16     240    
32     160    
240    304    
-480   48     
-224   64     
192    176    
-128   288    
144    96     
160    32     
512    80     
128    176    
32     496    
320    464    
-320   -112   
272    192    
80     208    
-96    -48    
80     32     
-416   -48    
-112   -16    
-1424  -48    
320    32     
-16    48     
144    112    
-560   -144   
240    48     
-16    16     
96     0      
64     80     
-32    288    
32     128    
-192   0      
256    64     
-304   -160   
-352   -96    
0      80     
240    144    
-224   -80    
-80    16     
112    112    
-32    0      
-128   32     
32     -16    
144    -112   
-192   48     
176    32     
-144   -16    
0      -32    
48     80     
0      48     
-48    64     
32     96     
-688   -16    
272    224    
112    -16    
-16    48     
176    144    
-192   -80    
0      -64    
-144   -16    
96     80     
-176   -32    
16     -16    
0      0      
80     112    
-320   -48    
-80    96     
-1312  -48    
16     32     
240    80     
144    -16    
-80    32     
-64    -16    
192    128    
-16    96     
-176   128    
-16    80     
-16    64     
-224   -48    
80     96     
-48    160    
0      96     
-336   -16    
0      32     
64     144    
-256   -208   
160    -400   
-224   0      
240    160    
-64    16     
32     80     
-64    0      
208    128    
-112   -16    
96     112    
-48    16     
32     160    
-272   -80    
-16    -400   
192    -208   
48     -96    
-416   -992   
272    -160   
-32    496    
48     144    
-176   -208   
96     64     
-64    80     
-176   -240   
112    -224   
-16    176    
0      160    
-16    -64    
160    144    
-144   384    
240    -80    
64     176    
-128   64     
64     160    
16     32     
-32    32     
16     -656   
96     576    
-32    -96    
80     96     
-64    80     
192    -48    
-96    64     
176    -16    
-32    304    
32     -80    
-224   -1024  
144    -480   
256    752    
32     832    
-64    -32    
-32    -272   
128    208    
-128   64     
80     16     
-144   80     
352    384    
-112   304    
-16    -80    
-48    -16    
64     -16    
-48    80     
80     80     
-32    64     
-32    -48    
16     -160   
96     -16    
160    176    
-176   112    
16     64     
96     128    
32     96     
-208   -384   
32     -112   
64     0      
480    640    
-80    752    
-96    720    
304    -176   
48     -32    
-80    -32    
-288   -240   
160    -176   
-192   -64    
208    80     
-144   -16    
160    272    
208    352    
144    336    
0      240    
-240   -64    
80     96     
192    464    
-96    64     
-288   304    
208    -128   
-160   -224   
288    352    
112    608    
96     112    
256    208    
-256   -176   
208    288    
-160   96     
64     96     
128    -208   
-48    -48    
176    368    
-32    224    
-256   48     
352    64     
-192   272    
320    -256   
-240   0      
240    144    
128    224    
-80    48     
208    128    
-160   -160   
80     192    
-96    -32    
128    160    
384    400    
-256   -64    
160    -192   
-96    272    
-240   -944   
80     272    
96     320    
-112   -32    
32     48     
176    -208   
0      256    
48     -400   
240    224    
-336   -304   
304    144    
16     96     
224    -160   
-176   -192   
128    -112   
-80    -96    
416    288    
-368   -256   
160    -336   
64     752    
0      -768   
96     -112   
-160   -304   
176    48     
0      144    
128    128    
80     112    
16     -176   
-32    -208   
-32    32     
48     480    
256    400    
-160   160    
224    -80    
-96    0      
-48    -64    
160    112    
-176   -528   
256    -16    
-192   -96    
112    -256   
-80    -128   
128    -80    
-32    -64    
0      96     
80     336    
32     368    
240    480    
80     16     
-16    176    
0      128    
16     -336   
-272   -656   
160    -48    
-32    96     
224    128    
80     208    
-96    16     
112    272    
-64    176    
64     304    
336    0      
-256   176    
48     0      
-32    48     
64     -528   
128    272    
-208   -864   
32     -112   
32     32     
224    384    
-128   176    
32     32     
-64    80     
0      112    
80     128    
-32    96     
48     -96    
-16    -256   
240    240    
80     -352   
-16    112    
32     16     
-96    64     
112    -240   
-32    80     
32     80     
-32    160    
-128   32     
144    0      
224    64     
-48    128    
224    80     
32     -144   
32     112    
80     16     
-192   -144   
112    -32    
64     176    
-80    -384   
48     48     
128    80     
-64    -48    
240    128    
-800   0      
80     -960   
-64    -112   
160    -1920  
48     -192   
48     112    
144    16     
128    112    
48     -96    
32     -16    
48     -320   
64     -864   
-16    0      
16     64     
176    128    
-208   0      
-176   32     
208    -128   
0      -432   
176    -48    
-16    -112   
160    -128   
-32    0      
48     -224   
112    -448   
-80    112    
112    -96    
32     112    
48     -16    
96     -320   
-608   192    
208    192    
144    272    
-96    -656   
64     -368   
112    -192   
144    336    
160    -2896  
-112   -80    
176    96     
-64    48     
32     -16    
16     80     
272    80     
-160   -128   
32     -176   
192    -128   
-1168  80     
48     -112   
-16    -144   
80     -192   
0      -16    
80     -384   
-32    -80    
224    -32    
128    80     
-16    -16    
96     32     
-192   -192   
80     -112   
-128   -224   
32     -336   
-1008  -96    
144    -96    
336    464    
-528   -112   
256    -112   
-112   -128   
-128   -64    
-16    -1424  
48     112    
128    -224   
-64    80     
32     16     
-64    96     
400    464    
-16    -128   
-16    -112   
288    -32    
-704   16     
64     144    
-80    192    
16     -352   
48     -16    
48     -1040  
-112   -96    
-32    32     
160    0      
-144   -16    
64     -128   
-96    -128   
-96    -128   
-192   48     
-96    -128   
-304   256    
64     -176   
-192   -64    
192    -272   
16     -16    
16     -272   
64     128    
-48    -160   
208    -96    
-112   -112   
-128   -144   
-112   64     
-112   -16    
-160   80     
-80    48     
-560   -48    
64     -64    
96     32     
-48    -48    
192    48     
32     160    
48     160    
-240   16     
16     -16    
-256   32     
-32    -32    
128    256    
64     -64    
-144   -16    
64     -96    
-96    -80    
0      -48    
240    112    
-144   -48    
176    208    
-32    -256   
16     192    
96     -32    
176    -80    
0      0      
144    80     
-128   -144   
-96    0      
-272   256    
32     32     
-208   96     
144    112    
-128   -16    
80     -272   
-32    0      
-432   -368   
-288   -16    
-112   192    
-288   112    
-144   -32    
-256   0      
-32    64     
-176   32     
16     -608   
48     -160   
-16    -560   
-768   -112   
176    496    
-336   -288   
144    176    
-112   -112   
-112   -560   
-64    208    
32     336    
-80    176    
-1040  -208   
240    -240   
-192   432    
224    -16    
-96    -32    
144    32     
-352   -128   
192    144    
-96    -80    
-160   96     
224    80     
-128   16     
-32    16     
-336   0      
-16    64     
-304   -32    
320    256    
-976   288    
0      432    
-272   480    
-256   -352   
-64    -576   
0      16     
-32    -208   
336    240    
-176   480    
0      -16    
-16    -96    
128    160    
16     384    
192    224    
-224   80     
128    48     
-208   -48    
-368   -48    
224    176    
-176   240    
112    32     
-160   -128   
48     0      
-32    48     
80     80     
96     112    
16     112    
368    352    
-304   144    
-64    -160   
-96    -112   
240    288    
-304   -160   
0      0      
48     176    
0      48     
-192   -384   
-32    48     
144    32     
-144   208    
0      16     
-112   -80    
32     96     
-176   -48    
128    0      
-192   32     
208    32     
-64    112    
-144   32     
-560   -160   
32     -224   
192    96     
64     464    
0      336    
80     208    
208    304    
-64    112    
160    96     
0      240    
176    64     
128    400    
624    752    
-224   1072   
288    272    
-272   256    
-192   96     
-48    16     
-240   -336   
-192   -192   
-192   -352   
-352   -272   
32     288    
288    576    
-304   48     
32     -224   
-64    176    
-176   16     
-64    -16    
96     304    
-288   720    
160    -256   
-512   -1280  
16     -400   
0      704    
-208   -80    
-32    -16    
-96    96     
48     -32    
0      -16    
-96    -96    
336    16     
-336   80     
-192   -944   
-176   -272   
80     304    
-112   16     
32     -144   
0      16     
288    -352   
128    288    
144    352    
-16    352    
-48    144    
-144   -1104  
0      -320   
80     -32    
-160   176    
-144   -224   
64     -256   
-16    -64    
64     176    
208    480    
-320   224    
80     128    
-48    192    
-160   -224   
-16    -352   
16     -128   
96     128    
176    96     
-48    32     
352    208    
-384   -16    
208    32     
80     48     
128    112    
0      144    
32     224    
-80    272    
-128   64     
-64    32     
-32    128    
432    336    
-384   144    
128    160    
-320   -80    
64     112    
-112   192    
48     128    
32     0      
64     32     
64     -64    
-112   80     
80     112    
-64    128    
64     96     
16     160    
208    208    
-240   -128   
176    0      
16     -352   
-16    96     
-16    64     
-208   16     
80     48     
112    96     
-112   -16    
64     96     
208    144    
-48    -32    
160    128    
128    48     
0      32     
-16    80     
112    224    
-240   48     
16     64     
128    -16    
64     96     
80     80     
-16    48     
0      144    
48     112    
0      96     
-80    32     
16     48     
-96    32     
48     -96    
-112   -112   
144    240    
-64    -128   
240    -64    
0      160    
208    400    
-80    -16    
64     48     
80     -16    
0      128    
16     128    
-64    32     
48     144    
-48    32     
128    112    
16     160    
16     160    
32     -48    
-112   -192   
96     16     
80     -848   
16     224    
-128   -16    
176    32     
-16    96     
96     64     
-128   -48    
128    80     
160    128    
-144   320    
-192   -192   
64     160    
-16    -96    
-112   -80    
96     80     
-32    -32    
16     48     
48     96     
-64    64     
64     16     
96     96     
48     144    
0      64     
176    64     
-128   176    
-48    32     
224    112    
0      64     
32     -32    
48     64     
112    -176   
-272   32     
368    -368   
-32    144    
80     64     
48     48     
144    -32    
-96    128    
112    112    
176    -16    
-96    16     
-48    64     
112    160    
160    -128   
-112   80     
144    -48    
80     80     
64     96     
144    208    
96     144    
-112   -80    
80     -128   
112    -32    
-32    112    
96     96     
-16    16     
-16    -48    
160    96     
80     -80    
80     48     
-96    -128   
240    -16    
-112   -496   
336    80     
-144   -688   
128    64     
64     64     
160    128    
32     64     
64     112    
-112   -64    
80     -144   
240    128    
-128   -32    
144    80     
-48    -128   
80     48     
-80    -784   
32     -64    
96     112    
144    112    
-192   -336   
192    128    
-64    192    
144    16     
16     144    
64     -176   
-48    48     
64     -16    
176    144    
-112   -192   
80     80     
256    336    
80     208    
-64    -512   
48     48     
80     -32    
-16    -64    
0      -112   
80     -224   
176    128    
-48    16     
64     64     
32     -128   
80     144    
-96    -160   
16     64     
208    48     
-304   32     
320    -80    
112    -1136  
-144   -96    
272    -288   
-128   64     
-400   0      
32     32     
144    -208   
16     -240   
-32    -272   
-112   320    
352    -32    
-416   -16    
336    -64    
-48    128    
96     -240   
-128   -176   
240    112    
-48    -176   
-64    272    
-704   -32    
64     -704   
208    0      
48     -272   
112    112    
-48    -208   
-96    -16    
96     208    
48     96     
144    80     
-176   -16    
320    -48    
-32    0      
-48    -80    
128    -224   
-16    -32    
-32    -352   
-48    -224   
144    -384   
192    128    
240    -304   
-32    240    
176    -1536  
160    64     
-192   0      
224    176    
-224   -416   
240    -32    
32     304    
-64    -240   
48     -48    
-32    -112   
-768   256    
-80    -304   
144    -32    
48     -96    
16     48     
16     -736   
32     96     
-128   -208   
208    144    
-144   -160   
224    192    
-240   0      
96     -160   
32     96     
48     16     
-240   336    
112    -80    
-48    -64    
192    -32    
-160   224    
256    -144   
-208   272    
32     -2256  
-96    80     
128    -16    
160    -64    
-224   -32    
48     0      
-80    -16    
64     -192   
-352   -48    
16     -64    
-784   -48    
32     0      
48     -16    
128    -288   
-80    32     
32     -400   
0      -160   
0      -384   
224    208    
-96    64     
32     -48    
-128   96     
64     32     
-240   -144   
48     -64    
-416   32     
-48    -48    
-992   0      
-32    -320   
128    256    
96     -176   
-32    64     
80     16     
96     64     
-144   144    
48     64     
-144   96     
160    160    
16     16     
80     -64    
-96    -16    
64     -144   
-16    80     
-48    -112   
32     80     
-16    16     
240    256    
-160   336    
64     -32    
-256   -208   
352    64     
-48    112    
128    -16    
48     176    
32     -128   
-272   -48    
96     -176   
-224   128    
-16    -128   
64     128    
32     -320   
144    128    
-16    -32    
80     80     
-16    0      
80     624    
32     16     
-160   272    
-192   -384   
-32    -320   
-224   -16    
96     -208   
16     368    
-256   -336   
-160   -176   
-1008  -640   
256    -1008  
304    640    
-32    1200   
-96    -656   
-1424  -176   
48     240    
48     -208   
192    160    
-176   0      
320    448    
-112   272    
-64    64     
64     -240   
144    80     
32     80     
-112   -336   
160    144    
-160   448    
-192   -160   
-48    -80    
-48    80     
-592   16     
-128   48     
144    96     
-192   160    
32     -32    
96     80     
16     -64    
-144   96     
-32    -48    
-64    -464   
96     -112   
112    576    
80     288    
-128   32     
352    352    
-320   176    
0      32     
-352   -144   
160    -48    
-256   48     
96     128    
176    512    
-16    -48    
-64    -48    
32     32     
-48    -16    
-256   -224   
176    224    
0      -32    
-352   -96    
-112   -160   
-288   128    
-48    0      
-128   96     
112    -224   
-32    176    
-112   -208   
-80    -112   
-224   -80    
240    96     
-64    -48    
256    16     
-80    96     
-96    0      
-80    -16    
-32    -16    
0      16     
-208   -112   
176    144    
16     -144   
-176   -80    
128    128    
-192   -32    
-16    96     
144    -16    
256    96     
-48    128    
-16    80     
48     48     
48     240    
-256   -32    
112    128    
0      0      
96     48     
-784   -48    
192    -48    
-144   0      
-16    32     
-128   64     
96     160    
0      16     
-64    -16    
272    144    
-128   64     
0      48     
-32    -112   
64     48     
-208   64     
32     -16    
-1104  -32    
48     64     
80     16     
16     0      
16     48     
32     -16    
0      48     
-32    -128   
-32    80     
240    64     
-240   -32    
-176   -48    
16     96     
-272   -96    
32     160    
-224   -48    
-16    16     
48     48     
96     160    
-208   48     
176    16     
-208   80     
176    144    
-48    176    
-48    80     
-112   48     
176    64     
-48    -16    
-48    32     
144    112    
96     48     
-64    -80    
144    96     
-128   48     
16     -272   
-16    112    
208    96     
-192   144    
48     48     
-48    176    
208    112    
-272   -80    
304    176    
-160   -128   
-96    128    
64     -48    
-80    112    
0      48     
0      192    
-48    48     
-96    64     
144    32     
-112   0      
80     304    
-80    144    
-96    32     
-48    -192   
208    128    
-208   -16    
-64    32     
192    128    
48     80     
-48    0      
144    112    
0      16     
-48    96     
128    96     
-32    96     
144    160    
-160   -16    
320    128    
-176   96     
80     64     
-224   96     
160    144    
64     128    
-32    80     
48     48     
48     64     
-144   48     
128    -16    
-96    96     
96     64     
80     128    
192    48     
-144   208    
-80    80     
-96    208    
160    -32    
64     80     
224    80     
-80    48     
-16    0      
-16    -64    
160    48     
0      16     
0      0      
160    160    
-272   160    
96     80     
-16    160    
16     0      
48     64     
16     16     
240    320    
-160   192    
128    208    
-80    48     
192    64     
80     112    
144    64     
64     80     
-80    32     
80     96     
208    304    
-112   304    
-48    64     
48     0      
-16    -64    
208    -32    
48     80     
32     96     
128    48     
64     144    
-112   -32    
96     160    
80     144    
-48    0      
-256   64     
544    -16    
80     0      
0      -240   
-176   -304   
336    224    
-208   -640   
128    176    
0      -80    
-48    80     
96     -128   
16     64     
240    96     
-48    176    
16     144    
32     80     
80     0      
272    288    
48     496    
-192   0      
-272   -176   
528    -464   
96     80     
304    272    
-192   64     
208    240    
176    80     
96     80     
-48    -48    
112    48     
0      96     
128    512    
224    464    
64     256    
-224   32     
128    112    
-176   -416   
-128   16     
-144   -928   
224    -320   
144    112    
256    320    
64     176    
80     160    
-64    -112   
112    112    
112    -160   
-32    64     
48     192    
0      -288   
272    96     
-128   -400   
96     16     
-32    -240   
16     -144   
176    464    
64     112    
48     -32    
-192   80     
32     0      
64     112    
0      32     
32     -32    
80     64     
304    96     
-208   224    
64     32     
384    416    
-464   -224   
48     -704   
-16    -2160  
160    144    
16     640    
288    352    
-32    144    
16     160    
48     16     
80     128    
-32    0      
160    -144   
32     256    
160    256    
48     48     
-32    -368   
16     32     
112    48     
224    288    
-144   144    
-144   -512   
96     -224   
144    224    
48     272    
-96    -176   
-176   0      
288    48     
32     64     
-80    -224   
224    112    
-128   -208   
64     80     
96     -320   
32     64     
16     -16    
16     192    
0      -80    
0      -320   
48     -416   
32     -32    
-128   -576   
-80    -496   
112    64     
-32    -128   
64     112    
80     144    
64     96     
-128   -224   
176    -720   
16     64     
-32    -1120  
32     80     
-528   -48    
96     112    
-32    32     
32     -1104  
80     -16    
-80    480    
64     48     
128    96     
48     48     
-144   64     
-32    -384   
32     -624   
32     -80    
48     -272   
176    -64    
-144   192    
0      272    
32     144    
176    -144   
-400   -640   
144    -1456  
-304   -464   
272    -512   
-144   -240   
224    -272   
-64    16     
160    -32    
64     32     
64     16     
0      -128   
-800   -880   
128    -112   
0      320    
-32    112    
144    -64    
112    -128   
-144   -656   
736    -960   
-304   672    
368    -928   
160    240    
80     352    
-112   -128   
96     -208   
-32    -192   
-16    -16    
-112   -272   
-352   -384   
256    80     
32     288    
176    -16    
32     -352   
32     -816   
144    208    
-96    256    
16     352    
48     -160   
-16    48     
-224   -64    
-160   -176   
128    -272   
16     -48    
-192   -32    
112    -176   
-128   -48    
128    -192   
-320   -128   
176    -352   
-64    -64    
368    -1472  
-144   192    
224    -80    
-32    -16    
0      -96    
-64    32     
-64    16     
80     80     
-528   -160   
544    624    
-1104  688    
-288   352    
-48    -192   
-32    -112   
256    208    
-448   -672   
208    -32    
-256   -112   
352    128    
-256   96     
64     -144   
-144   -16    
192    -32    
-288   -16    
112    -32    
128    128    
-128   -48    
-48    -16    
288    -32    
-288   112    
-32    -784   
-80    144    
240    96     
0      -160   
-272   48     
0      -144   
128    368    
-640   -176   
144    176    
-96    80     
-16    -16    
-96    -192   
-80    -32    
32     -160   
-48    176    
96     -96    
-96    128    
-128   -16    
-144   -48    
-112   -80    
-16    64     
0      16     
-32    16     
-112   -128   
-144   -336   
-32    -128   
160    -208   
96     224    
-32    -64    
48     304    
-1888  -208   
-192   -80    
96     0      
-112   48     
48     0      
-64    48     
48     0      
112    -48    
-80    -64    
32     48     
176    32     
-640   -32    
144    80     
-288   -96    
0      0      
-608   -304   
-128   48     
-48    80     
-48    16     
96     32     
-176   96     
-112   96     
-64    0      
48     0      
0      0      
0      32     
-384   -48    
-64    16     
-144   -64    
-80    16     
-208   128    
240    48     
-64    112    
64     32     
-160   32     
-112   48     
-16    -96    
-320   -48    
144    112    
16     80     
-32    -16    
-112   0      
224    112    
-176   -160   
-80    -160   
48     64     
-16    16     
-80    96     
-128   96     
-208   -224   
-192   48     
352    144    
-480   80     
-112   -32    
256    -112   
32     48     
112    -112   
224    448    
-144   64     
-192   -96    
128    -144   
-32    112    
-64    -32    
-288   -96    
144    32     
-240   80     
0      64     
-240   -32    
-96    16     
-384   -208   
144    80     
48     -32    
-64    96     
64     -144   
-96    -64    
-48    -144   
160    96     
-48    32     
32     64     
80     80     
-32    48     
-32    32     
-96    -48    
-64    64     
-144   96     
-64    96     
0      16     
-16    80     
160    144    
-224   64     
80     144    
-80    0      
208    0      
-96    -80    
112    64     
-176   -96    
-64    96     
-48    48     
-80    128    
-176   16     
32     96     
-320   -64    
96     48     
272    256    
-240   192    
-64    64     
-112   -48    
320    96     
-32    160    
-192   -48    
112    64     
-16    32     
-192   -96    
128    -32    
-576   -272   
464    -48    
-1168  -160   
-256   208    
-80    64     
-192   -240   
128    -176   
-240   -112   
32     128    
-16    96     
0      -80    
-48    -48    
192    176    
-352   -224   
400    192    
-128   128    
80     80     
-48    48     
144    64     
64     48     
-368   96     
208    96     
-48    96     
48     80     
320    608    
-64    544    
-144   240    
32     80     
-160   -32    
80     48     
-176   -112   
80     -16    
64     -112   
-304   -384   
240    -320   
-304   -128   
32     -80    
-192   0      
-64    -352   
0      -48    
-32    432    
192    496    
-160   208    
16     32     
0      80     
-96    -96    
64     32     
-32    -144   
80     -32    
-160   -272   
-160   -560   
-96    -160   
208    176    
-48    576    
96     304    
-32    -16    
-112   -112   
80     64     
-32    0      
-112   -128   
-64    16     
-144   -64    
32     -80    
0      368    
192    -16    
-176   -112   
48     192    
-64    240    
-16    32     
64     -272   
-192   -416   
624    432    
128    544    
-128   -464   
-32    432    
0      -384   
80     192    
0      224    
-64    -464   
352    192    
-16    448    
-160   -80    
-160   -688   
480    -96    
-128   -368   
96     480    
48     16     
272    224    
-192   64     
272    48     
-80    80     
-80    -16    
224    128    
128    112    
-64    96     
112    32     
-32    64     
16     64     
-16    -16    
16     -32    
-32    464    
-112   -64    
128    304    
192    688    
-48    -64    
-112   -32    
-144   -496   
128    80     
64     192    
32     96     
64     256    
-48    128    
80     96     
112    256    
-112   160    
112    16     
-128   -16    
144    48     
-64    -64    
128    -640   
-16    48     
80     80     
128    304    
-16    192    
224    208    
-16    128    
208    144    
-64    -112   
160    192    
160    112    
-240   64     
160    64     
80     96     
16     80     
32     -64    
96     80     
32     -1328  
48     80     
288    224    
-176   -192   
64     -32    
-80    -272   
464    16     
112    352    
144    -48    
192    144    
16     144    
192    288    
96     320    
0      368    
16     160    
16     -128   
64     96     
32     208    
-304   -528   
176    -432   
320    272    
-304   352    
240    -240   
-48    80     
-32    240    
176    -80    
-16    32     
80     64     
32     -240   
32     80     
16     16     
-112   -208   
192    -1296  
-144   -128   
48     -224   
-96    96     
-32    192    
16     -256   
-176   -48    
64     288    
-208   -160   
64     -16    
192    128    
160    32     
-144   64     
-96    -720   
192    -16    
640    592    
-432   -192   
96     -1440  
-16    -416   
80     -48    
48     288    
16     272    
-176   -208   
48     48     
352    240    
-272   -16    
64     -48    
112    112    
48     -464   
176    -64    
16     -96    
304    256    
-160   -320   
-176   -128   
224    -144   
160    160    
112    -48    
128    64     
96     160    
0      -352   
0      96     
48     -64    
32     64     
-128   -160   
352    112    
-96    -64    
128    0      
96     160    
16     0      
16     -320   
192    -112   
96     -48    
112    -96    
0      64     
224    -288   
-160   208    
160    -32    
-80    32     
112    -64    
16     64     
0      -48    
80     -32    
64     -64    
0      96     
128    -432   
-352   -2384  
416    -48    
-48    -96    
160    -896   
-96    -128   
32     -720   
-16    128    
32     128    
128    16     
112    208    
64     0      
112    240    
256    96     
80     -256   
-128   -224   
112    -400   
400    -128   
-496   -256   
-16    -32    
224    64     
16     16     
224    64     
-304   -1152  
96     -16    
-176   -16    
160    -160   
64     112    
80     -80    
336    -112   
-272   -112   
224    -144   
80     48     
-16    128    
-112   -160   
-16    -176   
-16    -176   
-64    208    
176    16     
48     -32    
-16    -608   
80     160    
128    32     
-16    144    
0      -48    
320    192    
-48    240    
-16    96     
-416   128    
64     -256   
-112   -112   
192    -64    
-160   0      
32     -352   
16     -32    
192    -624   
-112   96     
16     80     
32     64     
32     64     
64     48     
-32    -16    
80     -48    
-256   -64    
160    -64    
-544   -176   
80     -224   
32     -32    
96     -240   
32     -128   
-16    -1024  
48     80     
-160   -32    
288    96     
-64    -64    
192    16     
-144   -48    
16     0      
32     96     
-48    -48    
-80    128    
192    -48    
48     -32    
208    -128   
-96    48     
64     -448   
-80    80     
176    -688   
0      176    
128    -144   
-32    64     
144    80     
0      -16    
96     32     
32     -48    
-144   80     
128    -48    
-96    48     
160    80     
-192   -96    
176    -144   
160    256    
96     -688   
-160   -128   
224    16     
224    -144   
-224   48     
48     0      
-288   48     
-16    -16    
-32    160    
-112   -48    
16     32     
48     -96    
80     0      
64     -432   
128    128    
80     -224   
128    32     
-144   64     
80     16     
-48    48     
0      -64    
-16    -16    
80     -16    
-80    -32    
112    48     
-176   -128   
32     -384   
272    0      
-16    -16    
-48    144    
96     0      
48     -160   
-128   -80    
208    48     
-112   176    
0      32     
64     80     
112    48     
32     272    
432    208    
-352   224    
144    224    
64     400    
240    112    
0      -16    
-320   -144   
-304   -256   
-192   64     
-144   -48    
-80    128    
224    160    
-224   -112   
48     -208   
-224   48     
240    0      
-304   16     
-272   -112   
-96    720    
-48    304    
-16    -96    
-48    -48    
-80    -32    
-64    16     
224    128    
-176   240    
-80    -624   
-48    256    
48     -320   
-48    -80    
320    656    
-128   -288   
-144   -256   
0      -64    
-64    176    
-16    16     
48     -112   
160    368    
32     256    
-224   -80    
16     16     
-32    0      
-160   -16    
32     -16    
80     128    
-128   16     
96     -256   
128    448    
64     384    
-64    -288   
-32    64     
-144   -80    
0      -176   
-64    96     
160    208    
-272   128    
-240   448    
160    208    
-256   -144   
64     -64    
-320   -128   
96     -80    
96     -208   
32     256    
-32    96     
-304   -400   
176    -432   
160    688    
-128   112    
-48    -80    
80     320    
16     32     
-32    304    
-160   240    
32     -272   
-1184  0      
208    192    
0      688    
96     -1088  
96     -96    
-192   320    
-208   80     
-80    -384   
-128   -288   
288    144    
-80    -192   
64     288    
80     336    
-480   -208   
64     144    
-240   112    
224    80     
-416   -192   
512    32     
-352   512    
192    -352   
-384   208    
-48    -176   
224    48     
-272   576    
96     -640   
-192   -64    
-48    64     
144    -272   
-160   432    
-544   -352   
192    688    
-256   -208   
-320   -192   
-16    368    
0      32     
-16    112    
-96    -32    
-16    64     
-80    32     
112    16     
-176   64     
64     64     
-64    32     
0      80     
-112   -96    
112    -176   
-320   352    
32     208    
320    64     
-48    448    
32     304    
-96    -112   
16     128    
-96    -32    
-48    96     
-48    -16    
192    288    
-176   160    
-112   -192   
-160   192    
112    544    
-16    336    
160    -32    
-80    256    
-80    -176   
-16    96     
-128   -368   
-16    -96    
208    304    
-176   512    
160    -80    
-224   -432   
-160   -480   
-32    16     
-96    -208   
224    -32    
96     128    
0      64     
0      64     
-48    16     
64     96     
-32    80     
48     80     
96     112    
0      32     
256    128    
-160   272    
-176   -48    
-192   -48    
32     -256   
-16    240    
-64    64     
-64    -64    
-16    224    
80     144    
32     512    
-48    32     
-16    -96    
-96    112    
128    160    
-144   112    
176    352    
16     -176   
-32    -144   
-80    -208   
-32    -80    
144    128    
-48    192    
128    448    
32     128    
-48    48     
0      144    
64     64     
-80    16     
-128   32     
64     112    
32     176    
-384   96     
176    352    
-336   0      
320    -224   
256    192    
-176   80     
-32    32     
0      48     
-32    32     
-144   -16    
112    96     
80     96     
16     -32    
16     64     
112    96     
-176   16     
-64    96     
240    96     
-96    96     
-80    112    
-144   48     
176    32     
-64    -144   
368    16     
-160   16     
112    144    
-96    64     
80     96     
-80    48     
304    96     
-368   48     
-64    -416   
-80    304    
144    -16    
-16    -48    
48     -16    
112    144    
0      96     
-64    176    
32     176    
-176   80     
112    -160   
64     240    
0      -16    
-80    128    
144    160    
176    -160   
32     80     
160    352    
224    160    
16     288    
-16    112    
224    224    
-160   208    
16     -32    
112    -80    
112    -128   
192    96     
-32    0      
32     48     
16     -16    
-32    -112   
320    272    
-448   -736   
272    -432   
16     -32    
400    128    
288    112    
-64    0      
32     176    
-16    112    
-16    0      
224    240    
240    192    
-464   -432   
-80    -128   
96     -288   
176    160    
0      -80    
224    304    
-144   400    
-80    16     
-16    -80    
80     -48    
80     48     
144    144    
112    160    
272    144    
-64    0      
32     -256   
-32    -32    
48     -80    
-192   -240   
32     -336   
32     112    
64     -1856  
-16    80     
160    32     
192    304    
192    320    
16     80     
0      16     
544    448    
-400   160    
208    80     
160    176    
112    0      
112    144    
-176   176    
80     48     
-80    -304   
320    160    
-96    -32    
32     -32    
-16    80     
128    48     
-160   -144   
160    48     
224    32     
32     80     
32     -96    
144    -304   
128    64     
-112   -128   
144    112    
0      -16    
64     -16    
48     -464   
176    64     
144    80     
48     64     
48     112    
128    160    
0      -48    
32     -320   
176    64     
-240   -320   
176    128    
-16    -128   
16     128    
96     -384   
32     32     
48     -976   
0      112    
224    128    
96     160    
64     32     
48     -112   
-32    -224   
144    -48    
-32    16     
176    32     
-64    160    
144    48     
-80    16     
160    -320   
80     96     
-32    -176   
192    -784   
-96    112    
48     -544   
144    -256   
-64    -144   
256    -464   
-112   -16    
160    32     
176    32     
32     32     
-80    -256   
112    0      
96     64     
32     -384   
112    224    
-64    -48    
-224   -256   
112    -720   
96     -112   
-64    160    
-160   -400   
240    -16    
112    -48    
-80    -432   
96     -1184  
0      -96    
96     80     
80     192    
-32    -80    
-96    -336   
96     -352   
96     32     
-208   80     
368    208    
-288   128    
48     -256   
128    -176   
-16    -224   
16     0      
128    -416   
176    320    
80     -208   
96     160    
144    96     
-80    80     
80     352    
48     144    
-48    176    
-112   -192   
-320   -32    
64     -96    
320    128    
-112   64     
-96    -432   
288    48     
-48    0      
48     -1664  
-48    16     
48     -96    
0      96     
192    64     
-160   208    
-176   -256   
176    -80    
-48    496    
-160   -48    
-272   -272   
-96    32     
128    320    
64     64     
-144   -192   
96     -176   
-96    640    
-48    -192   
-32    -352   
144    224    
96     144    
-176   160    
112    64     
192    80     
-240   -48    
160    -352   
-176   -592   
288    256    
-144   16     
64     -192   
-96    -224   
-16    -16    
48     -1584  
240    64     
-176   -368   
-112   -144   
96     -160   
416    560    
-176   432    
256    -144   
-640   -304   
-32    -240   
-64    -48    
160    -48    
-96    -192   
288    -208   
48     192    
240    -544   
80     80     
64     16     
256    160    
-64    32     
16     -288   
144    32     
80     320    
-352   -384   
400    -368   
-128   848    
528    544    
-320   32     
16     -832   
-128   -64    
384    80     
-288   80     
112    -336   
-64    0      
128    960    
-336   -48    
-176   -592   
576    -128   
48     816    
32     208    
-32    -80    
-32    -112   
176    -160   
544    640    
-208   512    
176    -528   
224    48     
-144   32     
16     -176   
-288   -208   
224    -176   
-16    -16    
288    528    
-80    16     
336    -464   
-160   96     
416    -128   
16     336    
-464   -272   
176    656    
-96    -192   
-240   240    
-48    80     
-192   -32    
-352   48     
-128   64     
-128   -112   
16     16     
-80    -160   
-432   64     
-80    144    
96     464    
0      -96    
-176   -96    
32     176    
-160   -304   
-464   -432   
80     144    
16     -192   
-224   -160   
144    368    
-240   96     
224    -336   
160    160    
-320   -16    
128    0      
16     352    
-16    -48    
96     -336   
-352   -288   
384    64     
-192   352    
272    112    
-320   -288   
112    0      
-400   -32    
-144   48     
-864   144    
128    -80    
-448   -432   
176    336    
-288   48     
128    -48    
-160   -224   
-224   -128   
272    48     
-112   288    
-112   -48    
-80    160    
-176   96     
16     96     
32     48     
-160   96     
176    96     
-1616  16     
192    48     
-208   -128   
96     112    
-32    64     
128    176    
-64    240    
-32    64     
240    368    
-416   192    
48     240    
-160   112    
128    224    
-80    64     
16     48     
-1040  -112   
96     -16    
-16    16     
176    272    
-272   176    
0      0      
-80    32     
-112   -128   
-16    -128   
0      16     
48     192    
-304   16     
-64    80     
-208   -112   
128    192    
-512   -96    
112    96     
48     -48    
80     112    
-48    48     
-128   80     
-80    -32    
128    32     
-16    64     
-256   112    
192    48     
-16    -16    
-96    48     
32     32     
32     112    
48     64     
64     -16    
-352   -176   
-400   80     
272    64     
-112   64     
112    48     
-16    96     
64     16     
-16    -16    
-16    16     
-16    -208   
192    160    
-160   336    
432    160    
-368   -288   
304    96     
-256   96     
192    176    
-112   64     
208    112    
-176   -16    
160    32     
-272   96     
64     112    
-240   272    
-160   96     
-80    -16    
-128   0      
-192   208    
48     288    
-64    512    
240    128    
-48    80     
64     112    
112    80     
-112   16     
176    16     
0      240    
176    -48    
-128   80     
176    80     
0      64     
-384   -384   
208    -272   
192    112    
64     64     
-16    128    
48     128    
80     208    
32     144    
224    272    
48     -48    
48     96     
0      384    
336    32     
-288   -96    
432    208    
-112   64     
112    160    
-96    32     
16     -16    
-48    -96    
-32    144    
80     64     
-160   -144   
80     112    
112    80     
96     96     
-32    32     
240    384    
-432   -32    
272    176    
-208   -16    
144    0      
-32    48     
224    96     
-128   -112   
384    96     
-192   32     
432    176    
-160   80     
240    160    
64     48     
-384   112    
160    96     
-144   64     
192    64     
-144   16     
-128   -32    
160    -80    
-48    -32    
48     64     
256    320    
-272   224    
32     144    
64     112    
0      0      
-48    80     
-176   112    
224    -16    
-80    -32    
176    176    
-256   -272   
-64    -800   
96     64     
0      112    
96     128    
0      48     
128    112    
16     112    
224    64     
-144   -32    
144    64     
-80    96     
160    112    
16     -32    
16     80     
-48    112    
96     -224   
144    208    
-32    0      
-32    -32    
224    240    
96     224    
-128   144    
-64    80     
160    0      
96     64     
144    368    
-16    240    
-80    64     
80     0      
112    176    
16     -128   
-64    144    
192    480    
80     0      
-32    96     
-48    432    
192    480    
48     128    
32     64     
160    80     
-224   0      
112    96     
64     208    
80     -80    
0      96     
80     -352   
32     96     
64     -512   
32     128    
64     48     
16     96     
48     32     
0      96     
-32    0      
160    464    
96     32     
-32    -16    
-192   -560   
192    128    
160    256    
-208   32     
272    -80    
112    112    
32     32     
-112   -352   
112    32     
-160   -48    
48     144    
-16    -160   
80     144    
80     80     
-64    192    
48     -176   
16     -192   
64     176    
32     -160   
160    64     
32     144    
144    208    
-16    -1072  
144    -16    
160    -656   
64     128    
64     144    
-16    32     
112    112    
-64    336    
80     -80    
64     -256   
160    320    
208    128    
64     176    
112    -464   
80     48     
48     -688   
96     80     
32     -272   
160    144    
-160   96     
64     80     
-96    32     
160    80     
-16    96     
128    -16    
0      96     
112    -448   
96     80     
-80    -272   
-16    -64    
112    336    
16     80     
-96    -336   
176    96     
-48    16     
208    128    
-16    -32    
224    -16    
-304   -256   
16     -400   
-48    -64    
-256   -448   
208    48     
-176   96     
688    336    
-384   336    
32     416    
448    -320   
-816   -336   
144    -352   
-128   -336   
16     -1584  
160    -128   
-272   -2528  
592    64     
-480   -64    
-208   -528   
64     48     
-96    -128   
224    -192   
32     144    
-176   -352   
128    80     
192    128    
80     -112   
64     -144   
-32    -800   
272    -192   
192    -160   
0      32     
-96    32     
16     -240   
0      -816   
-48    384    
48     -400   
-96    -160   
-16    64     
48     -336   
-96    -528   
240    -528   
-64    -16    
208    -80    
-192   -208   
448    -112   
-48    336    
-64    -80    
0      -352   
256    -1008  
-240   -144   
304    128    
-144   -64    
64     128    
-64    96     
-16    -128   
-208   -192   
-16    -912   
-144   -240   
80     496    
80     -592   
-320   -832   
-48    -48    
96     352    
-48    -400   
64     -64    
-64    384    
224    256    
-112   192    
32     -48    
-304   -704   
-80    -160   
16     80     
208    496    
-512   192    
336    48     
-112   96     
64     64     
112    -64    
336    288    
-48    0      
-32    -272   
112    -16    
16     -208   
144    80     
160    -112   
128    -32    
32     -112   
112    -144   
-192   -112   
48     32     
-160   -112   
96     128    
144    32     
64     -128   
-240   208    
144    -112   
-32    144    
16     64     
80     64     
64     -112   
-16    -368   
-192   -112   
16     -128   
-80    64     
-96    -16    
-48    96     
-64    16     
-1136  -64    
-288   -640   
-64    -256   
144    -208   
48     48     
-16    -1104  
112    80     
-80    -16    
80     80     
32     128    
96     -16    
96     48     
288    224    
-480   16     
176    64     
-480   208    
256    304    
-32    272    
-64    16     
16     176    
0      -720   
16     -368   
64     -160   
64     32     
48     32     
64     0      
-336   -80    
144    -144   
160    -240   
80     -224   
-96    80     
-192   -544   
240    64     
224    -64    
-192   32     
112    -144   
48     -16    
-64    -80    
80     -32    
-304   64     
80     -64    
-304   -96    
80     -80    
-32    64     
32     32     
-608   64     
-16    -112   
144    192    
-160   -160   
-16    64     
224    16     
-352   48     
-128   48     
-400   -16    
-16    48     
160    80     
-64    32     
176    128    
-112   80     
-48    -160   
-448   -160   
-688   -160   
240    208    
-736   -80    
80     64     
128    48     
-656   -208   
320    16     
-288   48     
-208   112    
-736   64     
16     48     
128    -128   
-176   -240   
160    -144   
-32    16     
48     -112   
48     0      
0      -112   
128    80     
-16    192    
-112   288    
64     224    
-176   96     
-32    128    
-80    32     
-64    0      
-1952  80     
-416   144    
-16    -192   
80     -96    
176    208    
48     240    
-176   -256   
-48    -16    
16     -16    
16     -32    
0      144    
-112   -144   
64     64     
-96    0      
96     -96    
-320   144    
208    176    
-304   0      
160    96     
16     192    
-240   112    
96     0      
-160   -160   
272    144    
-112   -48    
176    -48    
-192   144    
176    128    
-416   -64    
224    96     
-432   0      
64     96     
-1168  -96    
32     48     
272    368    
32     80     
144    48     
-80    32     
16     -80    
144    320    
-32    16     
-208   -64    
128    112    
192    256    
-16    -16    
-64    -96    
80     128    
-928   -176   
-64    96     
128    16     
16     192    
-208   16     
64     176    
112    144    
-256   -96    
64     128    
112    64     
64     64     
16     208    
16     0      
-240   -112   
224    32     
-256   112    
112    -16    
-336   48     
160    80     
0      160    
-64    80     
-64    48     
-144   144    
96     -16    
-16    0      
80     32     
-80    96     
112    288    
-96    144    
-176   64     
-96    -32    
112    144    
-624   -272   
32     -64    
-48    96     
-112   64     
-80    48     
176    192    
-176   144    
-368   -144   
96     -128   
-48    -80    
0      128    
-16    304    
-160   192    
-32    0      
-192   32     
32     32     
64     0      
-32    0      
32     16     
-48    64     
80     64     
-128   -64    
144    112    
-128   144    
-144   -32    
128    -64    
32     -224   
112    320    
-144   368    
-128   -192   
448    512    
-368   -48    
240    0      
16     672    
-96    -624   
0      256    
160    -96    
-256   -80    
32     352    
-48    160    
112    -240   
-64    -112   
-144   -768   
-48    512    
224    96     
-240   128    
80     32     
-256   -416   
208    288    
-48    48     
-112   32     
-32    64     
16     96     
176    96     
-256   -32    
208    80     
-192   0      
96     112    
0      112    
144    -16    
-128   -144   
160    48     
-80    288    
160    0      
-112   -32    
128    -16    
-48    80     
32     208    
-16    96     
16     128    
-128   144    
64     16     
-16    112    
368    80     
-240   -16    
176    96     
-32    32     
48     80     
16     48     
48     112    
64     64     
-64    48     
-16    0      
0      -48    
144    96     
16     256    
48     48     
96     -1152  
-80    96     
16     16     
96     144    
-160   32     
-160   -400   
-32    -400   
-48    64     
-288   -336   
-16    -288   
112    -64    
-160   128    
208    -16    
0      96     
-80    192    
32     -864   
224    176    
0      112    
288    48     
-96    80     
96     0      
-16    80     
32     80     
-32    48     
-48    -160   
80     80     
80     -144   
-16    -272   
176    112    
64     16     
64     16     
160    16     
64     224    
160    176    
-496   -224   
768    -16    
-176   592    
384    384    
-128   0      
-16    -16    
224    -144   
240    368    
-16    160    
-32    -288   
208    -32    
-160   -272   
128    -256   
128    -688   
-16    160    
-16    32     
144    128    
-144   -512   
-32    208    
304    -208   
176    160    
-352   384    
272    -80    
48     -288   
112    80     
-112   32     
80     -416   
-128   -128   
240    -448   
-256   96     
176    176    
-272   48     
448    560    
-304   48     
-32    -128   
32     -16    
272    304    
-128   160    
-16    -48    
96     -224   
16     -16    
352    16     
-144   -32    
288    -112   
-96    192    
16     -832   
16     176    
96     48     
-160   160    
96     -96    
32     -80    
-256   -352   
240    -160   
-48    80     
-16    -192   
-16    96     
48     -304   
-96    48     
112    -112   
-96    320    
-80    -752   
16     -128   
16     -256   
64     64     
-112   16     
-32    0      
-96    16     
16     64     
48     32     
48     -80    
128    480    
-16    176    
112    672    
32     -272   
-208   -16    
160    -272   
64     112    
-16    208    
64     64     
96     -32    
-48    80     
224    224    
32     -480   
224    112    
0      -144   
128    208    
128    -96    
-32    64     
32     -128   
80     96     
224    64     
-48    144    
80     16     
-32    80     
-80    -32    
128    16     
80     16     
256    176    
-176   32     
96     -304   
-48    48     
16     -192   
160    64     
176    -112   
112    64     
80     -32    
96     64     
-64    -208   
80     48     
48     112    
208    -432   
-208   -160   
112    -80    
32     -192   
176    -208   
64     -16    
64     -16    
160    288    
48     16     
32     80     
144    -128   
-96    -1520  
160    128    
112    -32    
32     48     
96     -528   
0      -176   
80     -64    
16     -480   
32     -112   
240    32     
-240   -96    
208    -688   
16     32     
-48    80     
272    288    
-304   80     
304    48     
-256   -16    
368    96     
-656   -160   
256    -80    
-800   -96    
-16    -80    
144    64     
-80    -96    
-96    -560   
240    -1024  
128    48     
-192   -80    
128    32     
128    -80    
-352   288    
112    -224   
-96    16     
-112   -48    
0      48     
64     -32    
80     32     
128    -48    
-48    64     
48     -96    
-16    -432   
48     64     
-32    -112   
64     160    
112    -144   
-80    96     
-48    -128   
304    -96    
-160   -128   
-112   -128   
32     -32    
0      -96    
-624   144    
128    16     
-48    16     
-48    -80    
0      64     
48     -336   
-352   64     
448    -64    
-64    0      
48     -80    
16     -16    
-80    -112   
16     -80    
-304   -112   
-96    -288   
-544   -288   
32     -32    
-160   16     
160    -224   
-64    -112   
224    -640   
-80    160    
160    -480   
-112   192    
-96    112    
0      48     
0      -80    
160    48     
-224   32     
208    32     
32     64     
-48    -208   
64     -144   
-80    -288   
224    112    
80     -144   
-64    96     
176    -160   
80     160    
-112   -48    
128    -128   
96     64     
208    96     
-128   128    
64     -64    
-304   96     
48     -128   
96     -80    
96     -16    
144    64     
-96    16     
16     16     
96     -768   
80     64     
-112   0      
-144   -64    
-288   272    
144    32     
-144   0      
32     -144   
-448   -160   
-240   -256   
128    -64    
112    -64    
48     -16    
-16    -448   
112    192    
112    -608   
-64    96     
128    64     
16     48     
-80    0      
-144   48     
96     -112   
96     80     
16     48     
-112   -48    
-32    96     
-32    -16    
416    480    
-320   -176   
-16    -64    
0      -16    
-48    176    
128    112    
-1520  32     
-128   160    
128    -128   
-160   80     
96     96     
-128   96     
-80    -80    
32     0      
-416   -112   
224    208    
64     -32    
64     224    
32     96     
-160   -96    
-144   -64    
-592   0      
-208   -256   
-592   -64    
96     80     
96     144    
-240   128    
144    32     
-48    400    
-32    464    
80     400    
128    224    
-192   176    
-48    32     
16     160    
-208   -384   
16     0      
32     112    
-288   80     
48     -16    
-1168  -128   
-32    -64    
-32    -416   
256    176    
-16    432    
112    160    
64     96     
-16    -384   
32     96     
-192   -368   
176    -16    
288    624    
-240   176    
-48    -32    
32     96     
-576   64     
-48    0      
32     16     
0      16     
-16    -144   
48     96     
-32    96     
-176   96     
240    -144   
-272   -48    
80     -144   
-128   -112   
64     -80    
-336   -16    
192    192    
-368   -48    
16     96     
-1216  -48    
-48    80     
-112   -176   
48     80     
208    80     
-144   96     
96     48     
-96    32     
-48    32     
160    32     
-304   96     
192    80     
-336   -112   
144    0      
-16    144    
-384   -128   
-48    -48    
-32    96     
0      128    
-32    64     
0      144    
-16    64     
0      0      
256    192    
-160   224    
16     64     
16     -128   
112    -16    
-320   -32    
128    80     
-544   -48    
192    176    
-112   -240   
160    -80    
-48    48     
0      80     
-128   0      
64     96     
-80    96     
-32    -144   
32     112    
-240   -128   
96     48     
-320   80     
80     128    
-144   144    
112    64     
64     -48    
0      64     
32     64     
-80    -64    
96     -96    
48     -32    
112    448    
80     400    
-64    -128   
-112   16     
32     80     
16     48     
16     64     
-96    32     
-160   -400   
192    -96    
336    640    
-144   416    
80     -176   
-16    0      
-16    80     
-32    -144   
112    96     
-144   208    
-64    16     
464    800    
-320   224    
432    624    
-224   -160   
-112   -80    
-64    176    
160    -16    
64     512    
-144   -272   
144    32     
0      224    
0      32     
160    192    
-96    -80    
-16    112    
-16    -112   
-336   -256   
144    240    
-112   320    
128    80     
-224   -416   
-48    -304   
192    -32    
0      64     
16     0      
208    96     
-224   -48    
112    48     
-32    80     
-96    16     
64     0      
-160   336    
384    352    
-176   176    
48     -80    
32     -64    
128    -112   
160    80     
-128   160    
224    176    
32     -32    
144    16     
16     64     
48     112    
-160   -64    
144    176    
-48    224    
-192   0      
64     -16    
128    96     
-352   80     
640    16     
-112   320    
48     -32    
-144   16     
-176   -16    
352    48     
-400   -64    
416    64     
-272   0      
352    32     
-304   128    
176    -304   
-128   48     
96     32     
0      80     
-176   -48    
128    32     
-64    112    
-16    96     
-16    80     
-240   -96    
272    64     
-304   160    
48     112    
-96    128    
112    -32    
-176   0      
-160   80     
224    96     
-80    -144   
80     64     
-16    112    
0      0      
144    128    
-128   16     
128    16     
-32    32     
-208   -32    
-160   -96    
80     112    
-32    16     
-32    0      
128    80     
-80    128    
0      16     
0      80     
16     64     
0      96     
48     32     
16     0      
192    64     
32     304    
0      96     
-96    -16    
176    -80    
144    -48    
-96    -192   
240    112    
32     -2208  
-96    160    
272    16     
-32    48     
96     160    
96     96     
48     -32    
-48    96     
-32    48     
160    80     
48     128    
240    16     
48     320    
80     -160   
-16    0      
64     -384   
32     16     
-16    80     
160    144    
-64    -112   
656    432    
-656   80     
192    16     
-112   0      
160    192    
64     0      
-144   -160   
-48    32     
160    -288   
64     48     
64     -112   
-32    80     
112    -1824  
-32    80     
-80    -80    
32     80     
-112   -112   
160    32     
48     96     
16     64     
192    144    
-48    112    
-64    48     
32     -16    
112    64     
32     -144   
-80    48     
240    -784   
48     96     
-32    -144   
64     144    
256    224    
-144   128    
0      48     
-64    -208   
0      64     
176    160    
-176   128    
112    -32    
32     96     
160    -272   
-144   96     
128    -192   
144    128    
-64    -176   
224    208    
-192   16     
48     16     
-80    16     
48     -496   
144    -240   
-96    0      
224    240    
32     -96    
32     80     
336    64     
-256   80     
-16    -96    
304    96     
96     -224   
256    256    
-128   -16    
160    80     
16     112    
80     32     
96     16     
-16    -176   
144    32     
-144   -256   
288    48     
80     16     
16     96     
-16    -32    
80     176    
112    16     
0      -160   
112    0      
48     -656   
80     -400   
176    0      
128    -272   
-80    -16    
192    -528   
-80    48     
128    96     
-80    48     
48     368    
128    -208   
-16    -336   
240    208    
64     16     
-272   -272   
-192   16     
432    -240   
96     -144   
-48    80     
80     96     
-192   -560   
352    -80    
-256   -512   
400    -672   
32     -416   
80     -48    
128    16     
-208   80     
48     16     
288    160    
-320   -16    
48     -48    
-560   -64    
336    192    
-240   112    
32     80     
16     -96    
64     -128   
32     -160   
352    -32    
-64    48     
32     -112   
48     112    
96     -384   
368    -576   
32     -48    
256    64     
-320   -128   
48     -144   
176    0      
128    -240   
176    64     
-192   -368   
144    -48    
0      -16    
32     128    
64     -144   
64     0      
16     -32    
80     320    
112    352    
-320   -112   
-800   -320   
16     -256   
-320   -288   
16     -256   
80     144    
-64    -240   
256    -416   
32     -624   
80     -400   
224    48     
-96    -32    
160    96     
-16    112    
192    160    
-16    -16    
-352   -448   
16     80     
-240   64     
112    -80    
-16    32     
128    -32    
-32    48     
64     -368   
64     64     
144    -656   
160    288    
32     240    
80     -176   
-144   -112   
192    0      
-144   240    
96     -288   
-288   -64    
-16    -112   
-864   -64    
-32    -320   
0      -144   
176    -352   
-16    112    
208    -800   
-96    96     
-112   -96    
240    -224   
-480   -128   
160    -208   
-144   -144   
176    -64    
-272   16     
48     -16    
-160   -128   
-16    304    
112    112    
64     -144   
160    -128   
336    -400   
-160   48     
-48    0      
208    112    
-64    -16    
32     64     
-96    32     
176    48     
-224   -16    
80     -16    
-64    32     
320    48     
-224   16     
160    16     
352    288    
-272   160    
0      64     
0      -32    
80     48     
208    160    
-32    192    
-48    16     
112    160    
16     224    
-48    -320   
-32    64     
-432   -128   
-112   -16    
-624   -208   
16     80     
-48    160    
64     112    
-64    352    
-288   -64    
-304   -48    
-96    -112   
-96    0      
64     128    
-64    32     
-48    -160   
-16    128    
-608   -160   
-80    672    
-48    -368   
-448   -432   
208    -176   
-128   416    
48     0      
-192   -896   
144    -16    
-592   272    
-80    48     
32     32     
96     144    
-208   0      
-16    -160   
-64    160    
-48    64     
112    240    
-128   -64    
96     48     
-288   32     
-144   -64    
-208   -32    
0      240    
224    240    
-272   256    
-912   -256   
-112   -32    
-80    -48    
-48    304    
160    -112   
0      144    
96     176    
-224   192    
208    -48    
-16    192    
-288   -320   
-16    -112   
-112   48     
-160   -32    
-128   32     
-256   -48    
240    128    
-128   0      
352    384    
-432   -224   
128    -48    
144    112    
32     112    
-64    128    
-128   48     
144    48     
-48    0      
16     96     
-192   -368   
-144   192    
96     128    
-112   48     
-144   -64    
272    64     
-208   -32    
144    0      
-96    -32    
224    96     
528    640    
-384   400    
16     192    
-192   96     
-16    48     
-64    64     
288    176    
-32    96     
-16    64     
-608   -144   
320    112    
-240   -144   
112    16     
96     32     
-64    -48    
144    160    
-304   80     
-48    48     
-96    128    
368    128    
-144   288    
192    208    
-400   -224   
96     16     
-48    -96    
-128   16     
-48    48     
-144   -16    
224    80     
240    96     
-544   80     
32     128    
-208   -16    
-32    80     
96     144    
-16    -32    
16     80     
-192   -48    
96     -16    
-160   0      
96     96     
96     240    
-48    -96    
-64    -64    
336    -64    
-32    -80    
464    96     
144    32     
80     32     
-64    -16    
64     192    
80     -16    
-160   96     
128    96     
-160   -16    
-64    16     
-160   96     
-128   -112   
-16    -32    
96     64     
176    64     
0      16     
-48    64     
0      -16    
-48    48     
32     -160   
112    176    
112    112    
0      112    
-16    -16    
-192   32     
176    128    
-240   96     
80     96     
32     48     
-64    16     
224    16     
-64    112    
32     -224   
48     -192   
48     112    
208    64     
-112   32     
-16    80     
-16    32     
-32    -16    
96     16     
-80    32     
256    96     
48     96     
-144   224    
160    32     
-176   128    
128    0      
16     32     
32     0      
-16    96     
-112   -16    
128    176    
-112   -64    
16     112    
112    160    
0      80     
-112   16     
48     -208   
336    96     
-352   -16    
176    128    
-144   -96    
-96    32     
-80    112    
160    144    
-112   0      
16     48     
112    96     
32     304    
176    336    
-80    160    
80     -16    
-128   -240   
240    128    
144    16     
-64    48     
80     0      
48     160    
176    240    
-160   112    
-32    -16    
0      -848   
32     240    
144    80     
16     -16    
128    80     
-48    16     
64     80     
112    32     
32     16     
-128   80     
0      64     
144    112    
16     144    
-32    112    
64     32     
16     -320   
-112   96     
160    96     
144    112    
-112   48     
48     0      
-64    160    
224    144    
-176   80     
144    32     
-32    112    
-112   64     
80     -112   
416    192    
-256   160    
64     -192   
-16    80     
144    288    
320    224    
-304   128    
208    224    
208    -32    
-112   -176   
96     240    
128    336    
-288   -272   
224    176    
-272   -64    
-32    -32    
-16    64     
80     -48    
144    48     
-16    -1584  
176    160    
32     0      
192    64     
176    336    
256    224    
0      160    
80     256    
80     16     
48     -144   
-112   -240   
16     -192   
-80    0      
-128   -400   
176    288    
-432   -688   
272    32     
-208   -32    
-16    64     
96     -32    
-16    0      
-48    224    
160    96     
-224   -352   
128    80     
32     240    
144    16     
0      48     
208    -48    
-224   96     
144    -736   
32     -176   
320    -32    
-432   -416   
64     -672   
176    336    
64     240    
-80    -96    
112    16     
-96    272    
-64    -240   
-32    -112   
-64    -96    
48     -192   
112    480    
128    -336   
16     48     
208    -240   
-160   0      
368    512    
-384   -48    
384    0      
-64    720    
-208   -176   
0      -144   
32     128    
-48    -480   
32     240    
48     -160   
-112   224    
16     -512   
0      0      
128    -384   
208    240    
16     480    
-256   -256   
0      -96    
32     464    
-128   -320   
112    -192   
16     416    
208    32     
-48    336    
-144   -464   
384    -144   
80     560    
-80    304    
144    -160   
48     176    
-96    32     
208    96     
-272   0      
480    336    
-208   -192   
144    48     
16     -1024  
-80    -144   
-64    -352   
240    48     
224    432    
32     416    
528    208    
-208   -256   
-144   -16    
128    -96    
16     -928   
48     -64    
64     -32    
-64    -112   
-32    -128   
64     -384   
-176   -512   
32     -2752  
192    96     
96     240    
32     16     
16     256    
208    208    
-256   -336   
208    -80    
-112   -48    
192    32     
64     304    
112    80     
0      -416   
80     16     
-32    48     
304    -176   
48     -32    
-192   -576   
144    -208   
32     -160   
0      32     
64     -32    
64     96     
64     -48    
0      -112   
-64    -64    
224    -160   
-704   0      
64     -272   
240    96     
144    32     
-64    -240   
0      -1072  
144    -80    
32     256    
32     -176   
-16    -224   
48     160    
112    -48    
-32    160    
48     448    
-128   -272   
-288   -176   
224    144    
-80    -96    
192    0      
0      -80    
-32    -272   
-128   -304   
96     -336   
-192   128    
80     -144   
-80    32     
16     -144   
64     -144   
-128   64     
432    368    
-480   -352   
144    -208   
-848   32     
96     176    
96     208    
64     -96    
64     -160   
-48    -320   
48     16     
176    -144   
112    16     
-112   112    
112    -192   
64     -384   
-96    -256   
160    16     
-64    -160   
-176   208    
-128   160    
-176   112    
-112   -480   
-176   -368   
288    -576   
-192   176    
144    -1328  
-96    128    
32     176    
-48    -48    
-48    64     
-48    -176   
-208   32     
-192   -240   
112    16     
80     16     
-1136  -64    
16     -352   
-160   0      
64     -288   
-48    160    
96     -896   
32     160    
-144   -64    
32     -96    
80     0      
-256   -32    
304    48     
-128   48     
112    48     
-128   -128   
32     -144   
-48    -80    
240    160    
-160   -368   
176    224    
-176   64     
-176   -144   
-176   64     
-32    -64    
-80    112    
-128   -48    
16     -16    
-128   -176   
-160   96     
144    80     
-304   576    
288    -64    
-192   0      
48     -320   
64     112    
-160   48     
-32    64     
-160   80     
-144   48     
-336   64     
-112   96     
16     192    
48     48     
32     96     
48     16     
-160   -16    
-352   -16    
16     240    
-576   -64    
-160   -32    
-176   -128   
-112   32     
-128   -16    
-240   -32    
-240   -96    
-560   224    
-112   304    
-160   -80    
-96    240    
-288   32     
-80    -48    
-480   -144   
128    240    
-80    48     
-64    224    
272    320    
-112   -32    
-128   32     
128    240    
-128   256    
-400   112    
64     -16    
240    -80    
-16    32     
-128   -64    
-48    176    
0      -112   
96     80     
256    64     
-208   64     
-112   -16    
-64    -32    
-96    -80    
-112   16     
-48    32     
176    208    
-240   16     
-768   272    
-224   80     
-240   -160   
-48    48     
240    -16    
192    160    
-272   64     
16     128    
96     32     
-240   -144   
192    16     
224    96     
-112   80     
64     16     
-144   -64    
-304   -96    
-32    -16    
32     -16    
384    144    
-224   96     
-80    32     
-64    -16    
-80    -16    
48     112    
-192   16     
96     96     
48     80     
-96    128    
-112   80     
-96    32     
-272   -240   
336    64     
-1120  32     
160    32     
-144   -96    
-64    -48    
-48    64     
-48    -64    
160    0      
-48    128    
128    32     
-272   48     
208    128    
-112   80     
0      -16    
-128   64     
240    240    
-704   80     
176    96     
-272   -288   
128    -144   
48     16     
-32    32     
-16    64     
128    80     
0      96     
32     512    
-48    192    
64     -80    
32     -80    
0      -32    
0      176    
-208   -64    
0      160    
48     48     
144    256    
-80    -32    
-240   -160   
208    -32    
16     48     
80     16     
256    304    
-48    112    
-512   -432   
304    0      
-224   -176   
240    128    
-528   -192   
112    160    
-96    -96    
-16    -192   
-96    -304   
96     -192   
48     -16    
32     224    
0      0      
-176   -176   
240    64     
-208   0      
-32    16     
0      352    
176    512    
-160   -96    
-32    -224   
48     32     
-48    -32    
144    16     
192    288    
-192   -208   
128    32     
48     80     
0      192    
16     464    
-48    0      
272    864    
-288   -448   
-112   -128   
-320   128    
-448   -768   
128    192    
16     304    
-32    176    
-64    0      
-32    144    
-112   -80    
80     -128   
16     560    
-16    -320   
-96    -256   
400    176    
-400   496    
192    -256   
-64    192    
48     -16    
80     112    
-160   -256   
352    -128   
-112   320    
-64    -432   
96     304    
48     -256   
144    96     
-48    192    
-48    -192   
48     224    
-112   32     
64     64     
-128   -32    
384    80     
-112   -96    
-128   -128   
16     -96    
160    64     
48     144    
-128   -240   
576    112    
64     880    
16     112    
-112   -144   
80     320    
48     640    
0      0      
-128   -704   
128    -112   
96     272    
-16    464    
144    0      
-304   208    
128    80     
-144   -16    
112    -64    
-192   -304   
48     48     
176    160    
64     144    
64     192    
144    -1760  
-400   -112   
336    192    
80     800    
-64    176    
144    -352   
-112   336    
-32    16     
208    240    
-288   384    
384    16     
-304   -112   
288    160    
-240   656    
16     -80    
96     -1328  
-144   496    
256    -480   
-48    -96    
96     272    
144    48     
192    64     
64     368    
-176   112    
144    -272   
96     160    
-64    -80    
128    -48    
-16    -16    
-16    112    
64     -240   
-96    96     
112    144    
-96    96     
16     64     
64     80     
-48    32     
-80    -80    
176    -144   
240    384    
-176   -432   
96     160    
112    1136   
-16    576    
-320   -784   
688    -448   
-272   1104   
-128   -2624  
32     -144   
-112   -256   
16     592    
112    144    
-224   -688   
352    -80    
-112   -16    
32     464    
256    -144   
0      64     
128    112    
336    176    
-240   128    
-144   -288   
80     -112   
32     -208   
32     -1952  
112    224    
176    -16    
240    400    
-368   -240   
144    64     
-64    48     
160    64     
80     112    
176    64     
0      80     
64     -16    
64     48     
48     -464   
16     192    
-16    32     
-32    224    
-128   -640   
0      64     
80     192    
-160   -224   
128    -416   
-16    -288   
16     -176   
160    48     
112    192    
-256   -352   
256    -288   
16     -176   
176    256    
0      -496   
-16    80     
48     64     
48     80     
-176   0      
208    160    
0      32     
0      -512   
96     48     
96     -64    
80     -32    
-32    -16    
96     16     
-16    -240   
32     64     
-48    -2560  
-16    240    
192    48     
-128   192    
304    48     
-64    48     
64     144    
-16    240    
80     176    
-96    0      
80     160    
-112   -48    
16     96     
-128   -112   
240    0      
-208   -64    
288    96     
-48    16     
64     -1296  
-16    96     
256    -256   
-96    -464   
-144   -32    
432    -272   
-256   -80    
320    -1472  
-96    -96    
352    432    
-208   208    
-48    96     
-32    -304   
0      -1104  
96     48     
64     -160   
-96    16     
-304   -80    
80     -240   
64     -112   
144    -384   
-80    -128   
16     -64    
16     -160   
-80    128    
272    288    
-192   272    
48     -48    
-16    -352   
-160   16     
208    -48    
-176   -224   
-32    -304   
112    -144   
-320   48     
192    -32    
-32    -80    
112    -304   
96     64     
192    -336   
176    -96    
-160   96     
192    -224   
-16    144    
256    288    
432    800    
64     672    
-64    160    
128    -496   
-960   -64    
48     128    
-144   96     
32     -240   
-240   -336   
-160   -528   
-256   -112   
48     272    
-224   128    
-80    -48    
-32    -160   
48     -192   
128    0      
-176   224    
0      -160   
-48    -352   
128    -80    
0      -240   
80     0      
16     -80    
144    -336   
16     64     
-80    -800   
288    96     
0      -16    
-128   -112   
336    224    
288    80     
-160   96     
48     -80    
16     80     
240    -144   
-592   -48    
192    -272   
224    48     
-48    -32    
176    192    
-112   0      
16     112    
-32    80     
80     16     
224    192    
-448   16     
128    32     
48     -48    
0      -48    
-112   -96    
-272   -16    
80     -48    
-976   -32    
160    -160   
48     -80    
-64    -416   
64     112    
-144   -448   
192    336    
224    32     
0      32     
-80    48     
112    -48    
-128   32     
-16    -16    
0      -16    
240    -48    
-320   -16    
-96    -176   
64     64     
96     -128   
96     64     
48     -480   
160    32     
96     192    
-176   -48    
-32    16     
96     -96    
0      -32    
144    16     
16     80     
160    -48    
-176   0      
16     -176   
144    112    
-32    -208   
32     0      
-112   80     
48     -96    
-208   -80    
32     16     
112    16     
-16    0      
64     240    
304    -80    
-528   -32    
208    -288   
-80    -16    
-160   -112   
48     80     
-496   -128   
0      -256   
80     32     
224    16     
96     112    
-688   -160   
-208   -208   
176    -464   
-240   -384   
128    48     
-16    80     
-960   64     
80     96     
144    64     
-96    -336   
-272   -176   
-400   -48    
16     -208   
-128   144    
-144   144    
-80    -48    
-48    80     
-1504  144    
-16    48     
80     -192   
32     208    
-128   128    
0      0      
32     -16    
-80    -352   
160    -240   
-320   80     
-64    -800   
128    -80    
-192   -272   
32     32     
-240   416    
-256   -16    
-128   -208   
64     144    
-256   -32    
-112   -192   
16     160    
-224   -64    
144    80     
-176   64     
0      64     
-96    -288   
-96    -208   
48     112    
-144   80     
80     16     
-48    112    
0      64     
-416   0      
32     48     
-448   -640   
336    -80    
-96    208    
48     160    
80     144    
-176   48     
64     0      
-80    -16    
-112   224    
48     -336   
-48    144    
240    176    
-80    -32    
-272   -128   
0      -16    
48     16     
672    464    
-432   368    
-16    112    
-384   160    
-48    96     
416    240    
-256   160    
32     96     
-32    16     
-224   96     
-208   -112   
-256   128    
32     -128   
80     240    
-912   176    
-128   112    
112    -128   
80     80     
208    -32    
-176   16     
176    -16    
64     64     
32     16     
48     64     
-448   -528   
-128   -480   
256    -48    
-320   240    
-160   96     
-96    -48    
0      176    
-160   -144   
-32    -368   
272    240    
-32    480    
-208   0      
144    176    
-112   -32    
-384   -320   
80     0      
144    128    
-448   16     
-256   -608   
176    144    
-480   48     
96     -176   
-160   -176   
80     144    
96     16     
112    32     
-32    208    
-112   -224   
192    288    
0      592    
560    464    
-592   -384   
96     -288   
-176   304    
-16    -80    
-272   -64    
112    64     
-144   320    
256    -112   
-480   -480   
752    -624   
-80    1504   
256    -352   
48     -320   
144    416    
16     144    
-160   -64    
48     80     
-96    -80    
336    272    
-272   -608   
-32    -112   
272    32     
112    368    
-16    -176   
-192   -368   
240    704    
-256   592    
-32    -64    
-256   -544   
160    -48    
-240   -112   
192    96     
-224   -32    
144    -160   
96     400    
320    208    
-368   -240   
192    -80    
240    352    
-304   -16    
32     -576   
240    16     
64     224    
-80    144    
80     208    
-128   -240   
224    -512   
-128   -96    
144    64     
-48    32     
528    544    
-256   48     
176    176    
32     -192   
80     112    
-80    -96    
-96    -272   
576    304    
-272   128    
272    128    
-256   -112   
144    112    
48     48     
144    48     
16     -144   
-64    64     
80     -128   
16     -416   
0      32     
304    224    
-128   112    
64     -144   
128    -64    
320    368    
-160   128    
-176   80     
144    80     
-96    64     
288    112    
-96    112    
128    32     
16     96     
192    144    
-112   0      
96     256    
64     288    
-48    128    
144    48     
-128   -48    
-48    64     
176    -48    
0      112    
96     80     
-16    -1008  
112    64     
128    336    
-208   -128   
32     48     
384    144    
-176   176    
-80    64     
-16    96     
128    80     
-32    32     
32     160    
-16    -16    
336    -32    
-128   144    
176    -704   
-96    48     
160    96     
-64    32     
0      96     
80     80     
16     64     
-32    16     
128    32     
48     64     
64     -192   
16     0      
16     -16    
-32    -176   
-32    96     
-64    -576   
176    48     
-192   -928   
144    -48    
0      176    
16     256    
-32    48     
48     48     
80     64     
16     96     
96     -160   
32     208    
-192   96     
-144   -160   
112    48     
48     -176   
192    208    
-208   -736   
192    80     
-16    80     
-16    16     
160    -80    
48     64     
160    112    
-16    240    
192    144    
64     96     
112    80     
176    112    
128    176    
16     -48    
-160   128    
416    -192   
0      160    
160    208    
-48    32     
208    48     
-48    96     
192    16     
32     80     
64     48     
16     -80    
-160   -112   
128    -320   
160    64     
-32    -640   
-192   96     
256    64     
-352   32     
48     -336   
144    272    
32     64     
-144   112    
0      256    
112    336    
-16    64     
-176   -320   
128    16     
144    -112   
-192   64     
48     -288   
80     320    
176    0      
-80    160    
0      -752   
96     48     
-208   80     
208    96     
-112   32     
32     48     
176    64     
16     48     
112    160    
-224   -80    
144    112    
112    -16    
-32    160    
160    16     
16     48     
64     -128   
32     64     
-48    -80    
96     80     
80     64     
160    240    
144    368    
-304   -112   
128    128    
32     -48    
160    96     
48     -48    
-80    -48    
128    -32    
192    112    
48     16     
-32    96     
32     96     
48     -800   
-16    160    
-1232  -112   
80     -640   
-32    -48    
32     -208   
144    176    
-176   64     
-96    -288   
64     96     
208    0      
32     240    
128    144    
-112   -96    
80     272    
288    -176   
-112   -32    
16     48     
176    -64    
-112   -240   
288    144    
-48    -16    
-32    -320   
48     -16    
208    32     
144    208    
16     128    
112    16     
80     -192   
-208   -48    
48     -32    
128    -96    
-192   -112   
208    16     
128    -304   
-272   -912   
352    -560   
176    368    
-144   32     
208    -992   
80     496    
48     -144   
-464   -48    
128    -112   
48     64     
48     0      
64     48     
-256   -32    
64     -64    
-1280  -48    
112    -16    
80     0      
-48    -176   
272    80     
32     80     
416    96     
-176   -656   
96     -416   
80     80     
64     64     
32     -128   
80     48     
64     -16    
-80    -64    
128    -48    
0      -16    
96     80     
16     -352   
320    784    
16     240    
160    144    
64     -736   
32     16     
-80    16     
64     16     
-112   48     
192    -48    
-208   352    
96     -352   
-256   -112   
128    -176   
-48    -48    
64     -192   
-96    0      
352    160    
-240   96     
272    -352   
-160   0      
0      -288   
64     -240   
-144   32     
224    -128   
-128   160    
192    -16    
-224   -48    
144    -96    
-528   144    
208    -48    
-192   32     
192    -96    
-32    48     
96     -192   
32     128    
160    -448   
16     -32    
144    640    
320    320    
-48    -16    
352    -16    
-528   192    
112    -64    
-224   -64    
128    -224   
-48    -272   
208    -496   
-176   -304   
-32    -320   
304    304    
-368   80     
144    208    
112    176    
-240   -16    
-32    -48    
-336   -16    
128    -128   
-144   -176   
80     0      
-144   96     
-304   208    
-32    -288   
48     464    
144    16     
-336   -112   
-256   -192   
-592   -80    
-416   -448   
48     -240   
-16    464    
16     -48    
-16    0      
80     160    
-160   -64    
-64    -160   
32     160    
-960   416    
-368   320    
-656   -176   
-96    -304   
208    80     
-720   32     
112    64     
-304   64     
0      368    
-32    -208   
-304   -400   
-32    -576   
-320   496    
-80    -336   
-48    32     
48     272    
80     -16    
0      -208   
16     -128   
336    592    
-192   400    
272    64     
-304   96     
320    528    
-896   352    
-16    192    
256    64     
-64    240    
-80    208    
560    400    
-688   -96    
-144   -32    
-320   -464   
-272   -336   
112    -224   
-16    -96    
0      -272   
-64    80     
176    64     
160    -80    
0      -16    
-448   -208   
208    96     
-96    48     
224    224    
-16    -16    
96     48     
-192   96     
128    80     
0      64     
-144   -32    
-96    -32    
-272   -64    
160    80     
-256   -80    
160    112    
-384   -176   
96     32     
-192   0      
80     208    
272    352    
-432   192    
-64    192    
16     -96    
0      -32    
176    0      
-224   32     
112    -16    
80     -32    
-96    -96    
64     -48    
-368   -336   
-144   0      
-64    80     
-128   128    
-32    -128   
48     32     
-48    80     
-32    64     
-144   32     
0      -32    
16     -160   
-144   32     
128    112    
-272   -32    
96     0      
-384   -32    
240    176    
-160   -64    
144    128    
80     16     
-112   16     
112    -256   
-96    32     
112    192    
-256   0      
-16    48     
-80    48     
-112   -112   
112    -144   
-48    224    
48     64     
-96    -80    
-928   128    
16     64     
-112   -112   
16     -64    
48     -32    
80     -32    
-80    -16    
176    32     
-160   80     
0      48     
48     48     
-96    64     
-48    240    
-176   32     
96     144    
-432   -32    
0      64     
-64    48     
80     -64    
48     48     
-64    48     
64     112    
-32    48     
-48    32     
16     112    
208    272    
-64    -32    
32     160    
16     0      
0      64     
-16    -32    
16     64     
96     128    
-96    -48    
80     16     
0      32     
32     304    
160    64     
-32    -32    
48     112    
48     16     
-144   32     
288    80     
-112   -48    
32     16     
-16    32     
16     -48    
-80    -96    
160    -432   
-208   -80    
336    0      
-112   -32    
112    -32    
-144   -64    
-16    -144   
16     -32    
-64    80     
128    208    
-144   -32    
112    -32    
48     48     
64     112    
0      64     
160    32     
64     112    
32     160    
0      144    
80     0      
-48    144    
-144   64     
16     -16    
144    64     
-48    112    
80     -48    
-64    96     
48     32     
-80    -32    
160    112    
192    0      
80     32     
48     64     
16     64     
-16    -32    
-32    -32    
64     -272   
64     176    
-16    144    
64     96     
16     256    
-272   96     
240    96     
-192   96     
144    16     
-32    128    
-144   64     
-32    -16    
176    80     
-224   -96    
272    128    
48     112    
16     96     
-96    -32    
0      80     
128    320    
144    80     
-16    16     
224    176    
-96    -128   
128    0      
-16    160    
144    0      
-32    48     
128    96     
112    112    
-96    0      
80     96     
272    80     
64     160    
-96    112    
48     -32    
80     96     
-64    16     
48     0      
0      128    
-48    32     
-16    112    
304    96     
-128   48     
-16    -80    
-48    144    
320    112    
0      192    
64     -208   
352    240    
-288   -272   
0      224    
-192   128    
-16    96     
80     -64    
-48    -288   
480    192    
32     64     
16     80     
-176   -96    
336    -64    
-16    144    
-192   -160   
96     -160   
176    32     
96     -128   
-32    128    
224    -496   
80     288    
-16    272    
-96    144    
32     -336   
-64    -16    
144    16     
-16    0      
128    96     
80     192    
64     128    
0      -320   
240    48     
-64    -128   
0      144    
-48    -480   
32     112    
112    32     
-240   -592   
80     544    
-128   16     
192    -64    
-160   -128   
160    464    
80     80     
-80    80     
224    -16    
-48    176    
96     -192   
-16    128    
80     -768   
-16    48     
144    0      
-128   -32    
352    240    
-256   -608   
-64    -96    
192    432    
80     224    
-224   64     
384    96     
-32    -96    
-80    64     
96     -112   
16     80     
48     -224   
128    144    
0      -144   
32     48     
-16    48     
80     112    
32     -80    
80     240    
-176   48     
48     -240   
-96    -80    
144    288    
-48    128    
0      -112   
32     96     
-32    16     
336    272    
-256   -144   
80     -160   
144    272    
176    -64    
-96    -80    
208    80     
80     144    
-32    16     
32     48     
48     -144   
64     144    
-16    16     
32     192    
64     -192   
-96    112    
64     -512   
32     96     
96     16     
64     32     
-112   -192   
240    -1968  
48     -944   
224    624    
-112   512    
176    -48    
-48    160    
464    480    
-160   208    
224    -320   
0      128    
80     -112   
160    -544   
336    272    
-224   32     
128    80     
-272   160    
48     -304   
96     -16    
-80    -240   
176    64     
-32    -272   
-144   -448   
80     -240   
-96    112    
192    16     
128    -80    
112    -288   
208    -128   
48     -192   
112    96     
-128   16     
-144   -128   
240    512    
-336   -720   
-256   -784   
304    -112   
-64    208    
32     352    
-80    -528   
16     -576   
352    224    
-112   -144   
176    -304   
32     -352   
432    384    
-80    -64    
112    64     
272    -160   
112    -96    
80     -368   
96     368    
144    80     
-112   32     
-16    80     
16     -1120  
64     144    
160    160    
96     32     
80     64     
272    224    
-288   -160   
128    -592   
-816   -352   
128    -416   
0      32     
32     -80    
16     192    
64     -272   
16     0      
-32    -2400  
128    80     
-96    -240   
304    -224   
-240   -64    
192    -96    
-304   -32    
160    0      
-544   -128   
80     16     
-672   -112   
-64    -176   
-448   0      
-144   -128   
224    336    
-240   -224   
16     48     
96     -16    
-144   96     
-64    -128   
256    176    
-256   16     
32     -32    
-384   -272   
176    80     
-960   96     
-64    -64    
-640   -32    
32     -112   
224    160    
-48    -288   
-32    144    
-32    -432   
-64    32     
80     -32    
288    80     
-48    64     
-48    -48    
-192   -80    
272    -128   
-208   0      
144    16     
-224   64     
128    0      
-32    80     
192    -272   
48     48     
80     -352   
96     -64    
64     96     
192    -32    
-336   -64    
144    64     
-64    -240   
0      -64    
-16    80     
0      -96    
-128   0      
32     -240   
-144   -272   
352    -608   
-64    192    
160    128    
-48    96     
16     32     
112    -48    
-320   0      
192    0      
-80    -64    
48     -64    
208    144    
-16    -112   
-144   32     
176    -112   
96     96     
32     -16    
-352   64     
96     32     
-1760  -144   
-64    64     
32     -272   
-208   -144   
208    32     
-48    -224   
-144   -64    
-80    64     
-1136  -272   
64     112    
-144   -80    
-16    112    
80     -32    
-240   -400   
32     16     
-336   16     
-320   48     
-128   -48    
-112   64     
128    -64    
-96    -48    
-128   -32    
32     0      
-608   -128   
128    48     
-256   -112   
208    -16    
64     208    
-272   -32    
-32    48     
16     -32    
128    176    
-112   48     
-160   16     
-80    384    
-48    16     
0      48     
256    64     
-112   16     
-16    48     
-272   -192   
96     -96    
16     128    
-48    -64    
-32    48     
128    192    
48     80     
-304   -32    
128    0      
-336   -16    
112    144    
-832   -192   
400    -144   
-224   0      
-128   224    
144    -128   
-16    32     
64     96     
-96    32     
16     112    
-144   -16    
32     0      
-304   -112   
-288   -96    
144    16     
-128   -64    
-16    -64    
-16    96     
-272   -112   
128    176    
32     -64    
64     48     
-208   -64    
192    208    
-32    48     
96     -80    
-32    80     
64     64     
-112   32     
256    -16    
-64    144    
-368   32     
-128   32     
64     288    
288    96     
-16    -16    
96     64     
-176   0      
-208   -64    
112    80     
-112   144    
-16    128    
-128   32     
32     64     
-320   80     
208    -32    
-400   32     
176    16     
-832   16     
144    112    
-64    -80    
-96    64     
-48    16     
64     -32    
16     48     
32     96     
-32    48     
0      16     
-80    16     
-80    -16    
-144   128    
-128   -16    
16     160    
-576   -48    
64     768    
352    576    
-304   -64    
208    32     
-64    96     
16     96     
-32    -32    
16     -32    
-32    -16    
0      128    
-32    -16    
-176   32     
352    32     
-256   144    
-432   -144   
-256   32     
48     64     
0      272    
-80    -32    
80     -64    
32     192    
-96    80     
-176   32     
192    80     
192    176    
-320   112    
160    176    
-512   -80    
272    208    
-304   -144   
16     -432   
-80    -224   
464    112    
144    16     
-64    48     
-80    -96    
-16    -128   
-16    -80    
240    -80    
-96    32     
112    128    
80     544    
-16    352    
-64    192    
16     -32    
96     -48    
128    0      
-48    -32    
32     96     
208    112    
-112   112    
160    192    
-112   -32    
32     -304   
160    416    
-304   -128   
48     -192   
480    720    
-240   512    
-96    -352   
144    48     
32     80     
96     48     
80     224    
-48    320    
224    -80    
-16    384    
-208   -672   
-64    -208   
64     480    
16     -96    
64     -208   
32     160    
-96    400    
96     96     
32     192    
288    560    
-208   288    
112    32     
0      128    
-96    64     
80     -48    
-32    -32    
64     -80    
-160   -160   
176    -32    
0      192    
-32    -64    
48     -48    
-160   -304   
128    -96    
160    128    
64     80     
-32    112    
-32    64     
112    112    
-16    80     
-64    32     
240    64     
48     128    
-80    0      
112    96     
48     80     
80     -128   
-16    64     
144    304    
48     272    
144    64     
-192   128    
176    192    
16     64     
32     96     
96     112    
-160   16     
160    176    
-144   64     
96     -128   
128    128    
208    -304   
-192   -208   
240    80     
80     304    
-16    64     
-48    32     
160    96     
48     80     
-128   48     
48     -64    
-240   -416   
320    224    
-192   176    
112    -96    
-128   160    
240    -736   
-32    64     
96     0      
-48    -256   
64     -160   
480    592    
-192   640    
48     272    
-224   64     
-16    -128   
16     -48    
64     64     
0      16     
64     -160   
-80    32     
192    -544   
96     16     
112    -496   
96     128    
0      112    
112    64     
-160   320    
144    64     
112    192    
-224   576    
64     -336   
208    -272   
224    1312   
-176   80     
160    -288   
144    624    
-128   -80    
288    -736   
80     784    
-288   -464   
-32    -464   
-16    -16    
112    128    
0      -16    
160    368    
-16    144    
-48    -80    
96     128    
160    -64    
256    432    
-176   304    
144    368    
-128   240    
192    208    
-48    -560   
-64    -80    
-16    -432   
32     -336   
96     -144   
0      64     
96     -64    
-400   -576   
400    -64    
176    48     
128    160    
0      -144   
-64    64     
208    -64    
0      160    
304    0      
-576   -32    
320    80     
0      128    
96     80     
-64    0      
160    80     
224    0      
16     -32    
144    -768   
-272   -432   
304    -48    
-128   64     
-96    -144   
48     80     
112    -144   
-112   96     
-16    48     
-208   -32    
144    112    
48     -16    
16     -80    
16     -48    
144    64     
16     -160   
176    96     
-96    -80    
272    160    
-256   -144   
96     112    
-224   -1312  
400    0      
-64    208    
144    -368   
-96    64     
-576   48     
-32    -608   
0      48     
-16    -1648  
32     -16    
64     144    
272    160    
-368   112    
64     -48    
112    240    
64     -16    
16     -288   
-160   -128   
240    -16    
-64    -16    
-560   -32    
48     -288   
0      -128   
-16    -192   
0      -16    
-48    -400   
80     -240   
48     128    
48     -96    
96     -480   
96     -64    
240    -336   
16     80     
256    -208   
-144   0      
16     144    
-224   -16    
64     96     
288    -16    
-96    16     
-32    -368   
64     -128   
-64    -592   
-16    80     
192    96     
-240   48     
192    -64    
-128   48     
-32    -16    
112    -16    
96     32     
-32    16     
-64    0      
224    -288   
-112   0      
112    -400   
16     48     
-16    64     
0      -144   
64     16     
48     208    
208    -48    
-80    80     
80     16     
96     32     
0      -16    
96     -112   
-896   -16    
-64    -144   
-128   -464   
144    -304   
128    -16    
-48    -160   
80     -112   
32     -2336  
-32    208    
384    160    
-336   32     
112    176    
112    -96    
-400   -176   
96     -256   
-112   -16    
-32    -64    
-992   -112   
128    -48    
-32    -176   
-80    -208   
224    -32    
-144   -944   
224    0      
32     80     
160    -80    
-48    0      
80     -144   
80     64     
-48    80     
96     176    
112    -96    
-208   -48    
64     -160   
-480   -16    
48     -96    
80     96     
32     -240   
0      96     
96     -224   
144    -16    
-112   -64    
192    -176   
-384   144    
48     -48    
-512   0      
304    -16    
-304   0      
96     64     
-32    32     
64     -16    
192    80     
32     -384   
16     0      
-80    16     
144    64     
-352   -112   
96     16     
16     144    
-80    48     
112    80     
48     -48    
-208   208    
16     0      
64     32     
144    -112   
48     144    
-192   -240   
160    128    
-240   16     
80     96     
16     192    
240    160    
-304   -32    
16     -160   
144    64     
96     48     
-16    96     
96     16     
-160   64     
-912   -176   
240    160    
-400   -176   
-416   208    
-288   192    
-1696  -544   
-128   -16    
64     48     
-192   -416   
-64    -304   
-32    -64    
160    224    
-272   192    
-1056  -304   
80     16     
-128   -80    
48     64     
-96    -32    
-160   -80    
32     -32    
-144   96     
-240   0      
160    640    
-480   240    
-112   -128   
-192   64     
-192   16     
-176   -144   
-176   -160   
128    48     
-160   -224   
240    160    
80     64     
0      208    
-384   176    
16     192    
-192   224    
-256   -64    
48     -144   
-544   -304   
-48    528    
-96    96     
-160   96     
0      -32    
48     128    
-32    -48    
-64    -64    
-112   -96    
-96    -160   
-80    -128   
176    -96    
160    64     
-192   -32    
-128   64     
-224   -48    
-64    256    
16     224    
16     -368   
496    128    
0      1200   
0      -176   
-368   -480   
176    528    
-176   80     
64     -16    
-144   96     
-16    0      
176    80     
16     -176   
0      240    
-96    160    
-192   -192   
112    48     
-272   16     
128    -80    
-80    48     
-80    64     
240    48     
-192   -16    
128    48     
112    96     
-112   64     
-192   96     
208    96     
-48    16     
-64    16     
-400   -144   
96     64     
-176   0      
-16    112    
240    528    
96     208    
-128   96     
-176   -144   
-160   -16    
80     192    
-112   48     
528    544    
-288   640    
-224   272    
-112   48     
-400   -288   
240    -112   
-784   160    
-64    288    
-32    80     
-32    -64    
-32    -32    
0      -16    
-32    48     
16     -112   
32     144    
-144   112    
48     -32    
-144   -16    
304    48     
-336   48     
240    128    
-160   16     
-112   -16    
16     80     
-16    32     
48     64     
-16    32     
48     64     
0      48     
240    176    
-288   -96    
-48    112    
0      240    
-144   -32    
0      -224   
144    336    
32     160    
16     16     
112    208    
-96    -32    
-160   -384   
0      -64    
176    -112   
-480   -32    
176    128    
-48    96     
64     96     
-128   32     
48     80     
-144   -48    
-16    80     
112    224    
240    368    
-48    432    
-128   96     
96     128    
-48    -32    
-144   -336   
32     80     
96     32     
48     192    
576    912    
-240   864    
-144   64     
16     -976   
304    272    
-32    160    
64     96     
-96    16     
64     160    
128    224    
-144   -128   
-48    112    
-112   -624   
400    608    
-144   -48    
64     -48    
-160   32     
208    112    
-192   96     
0      -32    
-16    64     
-32    128    
16     160    
-128   -512   
144    -480   
-64    16     
160    -48    
-80    -32    
176    112    
-80    160    
64     112    
-16    -96    
224    -16    
64     16     
-16    16     
80     80     
16     64     
-64    128    
0      112    
96     64     
48     192    
-80    48     
96     -192   
-128   272    
112    32     
-16    -112   
80     -112   
160    32     
80     112    
-96    32     
144    16     
128    304    
-176   144    
-48    -128   
96     96     
160    160    
-80    80     
16     48     
112    64     
48     32     
64     112    
-80    48     
416    -336   
-384   176    
160    -272   
-160   0      
144    16     
0      -128   
-48    -64    
176    32     
176    32     
160    208    
-32    -64    
16     32     
-128   -272   
144    208    
-112   -32    
-48    -224   
96     32     
384    -560   
-192   -176   
176    128    
144    96     
112    272    
80     32     
64     64     
80     96     
-208   32     
-80    -144   
-176   -112   
0      -160   
16     208    
176    528    
-48    544    
-144   -224   
-224   -16    
144    96     
-160   -16    
112    32     
96     -16    
0      -16    
-32    64     
160    192    
-128   -112   
-32    144    
304    144    
-96    96     
144    -352   
-128   -96    
224    -480   
-32    128    
80     -272   
144    160    
96     192    
64     160    
-192   -32    
80     0      
0      16     
-80    144    
48     64     
-320   -272   
112    208    
224    -192   
-16    128    
16     -256   
-16    96     
320    -384   
-256   16     
80     -224   
144    32     
64     144    
64     176    
-16    16     
176    32     
32     144    
160    -144   
-112   112    
16     -192   
96     32     
240    256    
192    -16    
-32    -480   
-48    144    
48     -368   
-48    176    
64     64     
112    80     
32     112    
-64    32     
160    80     
128    32     
-80    48     
-64    -1072  
176    32     
64     -336   
16     208    
64     -384   
64     96     
-112   -208   
112    144    
112    240    
144    64     
-80    -144   
144    16     
144    176    
48     -208   
32     336    
448    64     
-256   144    
256    -16    
48     112    
-272   0      
192    112    
-80    32     
80     32     
32     -16    
112    192    
80     64     
64     48     
80     -528   
64     48     
-16    96     
160    -96    
144    96     
128    80     
-80    80     
128    64     
32     16     
32     -128   
48     -1056  
-64    96     
0      -352   
16     64     
-1008  -16    
64     -1280  
16     -256   
64     -848   
128    -32    
80     352    
80     16     
-32    144    
16     -16    
96     128    
-80    80     
64     -144   
-96    80     
160    64     
32     160    
-816   48     
-96    -240   
0      -80    
64     80     
-112   64     
16     -736   
208    -416   
-64    80     
272    160    
-16    -352   
288    128    
0      -192   
272    48     
-96    -176   
64     -144   
-208   -80    
0      -48    
224    320    
-96    -144   
144    -400   
48     -320   
304    224    
80     -2112  
0      16     
240    -64    
-32    96     
160    -16    
-16    128    
-192   -112   
32     -48    
-416   -48    
32     -32    
-240   -208   
240    208    
-432   -928   
336    -48    
-64    560    
-160   -1200  
320    -96    
-32    192    
240    48     
-16    -64    
224    -96    
-48    -160   
64     96     
80     0      
-16    -96    
-848   -80    
96     32     
-16    -208   
224    48     
176    416    
96     -336   
-48    80     
112    -1696  
-128   -80    
112    -32    
-128   112    
16     448    
-256   -480   
-112   -272   
64     144    
-256   208    
144    -192   
-976   16     
208    -16    
32     -112   
48     -160   
-96    -128   
-80    -592   
288    128    
-256   48     
208    416    
-16    -144   
16     80     
-64    160    
96     -112   
-304   -304   
-400   -656   
-400   -224   
-144   -48    
-624   0      
208    -32    
16     -368   
272    -240   
-192   -96    
32     -192   
240    288    
-192   -208   
368    -48    
544    672    
-544   -352   
-192   -560   
192    528    
-112   -48    
112    -144   
240    224    
0      -32    
-160   304    
192    -784   
64     208    
-112   336    
-32    -400   
-96    0      
240    192    
-80    416    
96     -128   
-224   -112   
192    -48    
-32    96     
-48    -160   
128    176    
384    -160   
-240   80     
176    -304   
0      -80    
0      -64    
80     32     
64     112    
48     192    
176    272    
-336   -336   
-96    -496   
192    416    
-64    320    
64     -176   
32     208    
-1296  -160   
-16    128    
-272   -336   
-48    336    
160    528    
-320   -480   
-144   32     
-1024  -96    
-48    -80    
288    384    
-192   128    
80     32     
0      32     
288    768    
-288   1040   
-240   -64    
-96    -224   
-80    -208   
-352   -416   
176    208    
-416   128    
-112   0      
-256   64     
176    48     
-432   48     
0      64     
32     48     
0      32     
-48    -80    
32     96     
-208   -16    
592    272    
-288   240    
-240   -448   
32     176    
-128   224    
-16    16     
-96    -32    
-128   -128   
-592   -240   
-144   16     
80     208    
80     -80    
-48    -64    
80     288    
-224   -368   
32     48     
-32    32     
-96    0      
-16    -96    
240    416    
-224   208    
-192   -80    
-80    -48    
-112   0      
-80    -64    
-336   -416   
64     -64    
-32    -16    
224    400    
-64    304    
-64    0      
320    320    
-240   -32    
160    48     
-224   -192   
96     -32    
-208   -32    
240    128    
-112   176    
144    192    
16     96     
-176   80     
448    32     
-384   176    
80     80     
-144   80     
96     96     
-80    64     
-80    48     
128    96     
-176   -64    
48     0      
48     208    
16     32     
112    64     
-256   -96    
192    16     
-160   -128   
144    80     
112    112    
-192   64     
160    160    
-288   96     
-112   -48    
208    32     
-128   64     
160    32     
-160   64     
-96    -144   
16     -96    
-32    -128   
128    128    
-288   -192   
416    144    
-224   48     
144    64     
-192   64     
32     80     
-80    48     
48     208    
32     240    
-144   -64    
48     224    
-32    16     
96     192    
-128   16     
128    16     
-816   -48    
32     -192   
160    -48    
144    176    
112    144    
16     -16    
-176   80     
96     304    
16     304    
48     304    
144    -48    
-32    -144   
32     -224   
-144   0      
160    448    
-112   32     
16     -128   
160    176    
160    176    
32     208    
-64    -48    
32     112    
-240   -16    
-320   32     
-112   80     
-96    -48    
-224   64     
144    144    
-48    -32    
32     0      
96     144    
-128   -32    
336    176    
-256   112    
64     176    
240    -224   
-64    -48    
112    -112   
-64    208    
288    176    
-48    112    
-80    -80    
-16    48     
-32    48     
48     128    
-112   64     
16     -64    
128    -80    
96     240    
-64    176    
-224   48     
368    128    
-320   144    
128    240    
-336   0      
160    -16    
-208   80     
32     80     
-192   -32    
144    176    
-16    112    
-112   112    
128    48     
16     112    
128    304    
-304   128    
96     80     
-16    48     
144    96     
-112   32     
176    176    
224    128    
-256   16     
208    96     
-144   16     
-32    48     
80     48     
0      80     
160    80     
-32    112    
176    64     
128    48     
-192   -32    
320    160    
-144   -224   
160    -176   
192    272    
80     -256   
0      32     
16     96     
112    32     
16     -16    
80     112    
96     96     
-32    -16    
48     16     
-80    -80    
-16    96     
96     224    
-64    48     
96     128    
-128   -320   
96     -816   
208    144    
-64    -96    
112    32     
176    96     
112    160    
96     48     
-208   -48    
208    16     
32     48     
96     112    
160    176    
-144   0      
48     96     
64     80     
64     80     
32     128    
112    -144   
96     48     
-16    96     
112    -16    
-128   -224   
112    48     
112    96     
-96    -48    
-160   -64    
128    -576   
80     -160   
224    48     
32     192    
240    240    
48     352    
-64    -192   
48     96     
0      -400   
0      128    
32     112    
96     80     
-64    -384   
96     -16    
-48    -128   
256    16     
-176   -256   
0      -448   
-128   -64    
160    -32    
-32    208    
80     -96    
-64    16     
80     -560   
144    352    
176    240    
-32    -96    
-80    -384   
224    320    
-144   128    
288    -64    
-64    -144   
96     -80    
64     80     
320    352    
-128   -304   
-16    192    
128    -160   
48     -128   
80     128    
32     368    
48     176    
32     16     
208    144    
-192   96     
176    160    
-64    0      
16     64     
64     128    
64     -128   
16     -160   
-80    -528   
-64    -32    
64     -1040  
0      272    
416    -160   
-96    592    
80     128    
144    -448   
192    144    
96     112    
32     32     
-64    -32    
144    96     
-288   -560   
208    384    
-80    -144   
-80    32     
112    -160   
48     144    
-64    240    
-112   -320   
-96    -160   
-48    48     
256    144    
-272   176    
-80    -400   
240    -224   
0      336    
64     -448   
-64    64     
96     -128   
-80    16     
208    -64    
96     208    
304    400    
160    288    
0      -48    
80     128    
80     -80    
-48    -32    
64     -160   
0      -80    
192    -992   
-80    -128   
16     96     
-352   -704   
656    48     
-224   -80    
160    -512   
112    96     
32     -816   
80     160    
-128   -656   
48     -208   
-400   112    
-64    -368   
288    80     
-48    32     
-48    -192   
176    448    
-656   -832   
16     -656   
176    272    
336    352    
-464   -224   
272    -480   
80     -176   
48     400    
0      -352   
-288   -448   
160    192    
-144   -208   
112    -240   
-64    -576   
224    -368   
-112   -608   
64     1040   
128    -288   
-80    48     
144    320    
96     736    
-112   -240   
144    -320   
448    -112   
-960   -128   
176    48     
-16    -16    
-80    -32    
96     -176   
64     -112   
-32    -416   
320    -2080  
-112   320    
48     0      
-224   272    
144    -112   
-192   -240   
-128   128    
112    -368   
-560   -368   
112    224    
-1632  -32    
80     -176   
-96    16     
48     -416   
32     128    
96     -272   
0      176    
16     64     
32     64     
304    304    
-544   -688   
128    -400   
144    496    
-144   -320   
96     -64    
-240   32     
-32    -400   
-576   -96    
16     -256   
144    144    
112    -560   
-208   64     
192    -1504  
-16    96     
80     32     
48     0      
-80    16     
80     -256   
-192   496    
48     96     
-80    32     
192    16     
-480   -32    
-48    -64    
240    0      
32     -304   
64     96     
48     -880   
48     64     
160    176    
48     -80    
-48    -64    
208    -368   
-112   -32    
96     48     
-272   0      
160    -32    
-304   16     
48     0      
80     -16    
32     -80    
32     64     
-64    -336   
32     16     
96     -32    
48     16     
112    0      
-96    48     
144    160    
-112   -16    
0      32     
96     -80    
-64    0      
-32    128    
240    16     
-112   -16    
160    96     
-144   -160   
160    -144   
-416   -112   
544    16     
-272   80     
624    256    
-416   64     
-48    -144   
0      -112   
112    -192   
-144   -112   
0      -144   
-96    112    
0      -336   
-80    -96    
-1712  -320   
-448   64     
-32    48     
-368   144    
-32    32     
-80    0      
-160   -16    
112    32     
-80    64     
32     -48    
160    0      
-224   -64    
-80    80     
-288   32     
64     32     
-64    48     
-224   -48    
-16    -32    
-272   -96    
-112   -240   
-352   -16    
-16    32     
224    64     
144    128    
128    64     
-48    -224   
288    -176   
-32    -96    
-128   16     
144    160    
-208   32     
-144   -128   
-224   -144   
256    48     
-368   80     
-112   -112   
-96    -96    
-560   112    
-48    -48    
-144   -96    
336    416    
-528   288    
96     480    
-48    144    
-112   32     
128    -32    
-400   -128   
-112   -96    
-96    64     
-48    256    
-160   96     
-128   -224   
-560   -160   
-112   -96    
-240   48     
48     368    
-464   -32    
0      -48    
-272   96     
-384   0      
368    -112   
-256   -64    
128    16     
160    128    
128    144    
-112   64     
-80    16     
-144   -16    
-304   128    
-256   -256   
-80    32     
416    64     
-224   64     
96     160    
-240   48     
-48    0      
-96    -96    
64     32     
240    128    
-352   -32    
-64    -160   
208    -16    
-112   0      
32     96     
-144   -32    
400    304    
-480   -80    
64     -16    
128    -80    
48     -208   
-80    160    
-48    80     
-144   0      
32     48     
32     64     
-32    64     
0      112    
-112   64     
160    160    
-176   80     
-112   96     
-576   0      
64     32     
112    224    
96     80     
-160   16     
-16    -80    
0      96     
-32    -112   
-64    0      
80     64     
0      96     
-128   -16    
64     112    
-256   -48    
192    272    
-896   -32    
-112   -48    
224    320    
64     176    
-64    64     
-160   0      
208    48     
64     48     
-16    64     
-80    -48    
-112   -32    
-160   0      
304    160    
-192   -16    
368    400    
-160   272    
224    32     
-112   80     
-96    -320   
-144   32     
-96    64     
288    128    
-208   32     
-16    64     
-112   16     
32     64     
-64    16     
80     112    
336    336    
-32    288    
-192   32     
64     304    
-288   -896   
176    32     
80     576    
-112   208    
16     -64    
-32    176    
-16    16     
-128   -160   
112    -128   
0      96     
-32    112    
-192   -48    
64     16     
-80    320    
0      -144   
176    80     
-32    -16    
144    128    
-16    64     
176    336    
-304   -672   
192    400    
16     0      
16     0      
-96    144    
32     64     
-176   32     
-32    -64    
112    240    
480    704    
-128   272    
-208   -832   
0      -960   
128    96     
112    592    
176    128    
-96    0      
-32    0      
64     48     
0      0      
-144   -192   
208    96     
128    256    
128    80     
-128   0      
128    64     
-80    64     
112    96     
64     96     
32     48     
-144   0      
-112   -16    
-144   -208   
48     32     
-112   0      
-128   0      
224    96     
0      160    
256    80     
-624   -608   
-16    -32    
288    608    
-320   544    
192    128    
96     304    
-32    240    
-96    96     
160    -64    
-128   -256   
64     -272   
-16    -624   
224    32     
-160   -32    
48     112    
160    352    
32     64     
-96    0      
16     96     
80     -16    
-336   -144   
-96    -640   
80     -432   
32     224    
48     352    
-112   320    
240    176    
-80    64     
160    -32    
-224   0      
-352   -160   
144    -224   
32     16     
192    240    
-144   176    
320    128    
288    448    
-352   112    
-32    -320   
-112   -64    
112    0      
160    64     
32     352    
-64    -432   
48     32     
-64    144    
112    -80    
-80    192    
192    320    
-208   16     
192    64     
-176   384    
192    -608   
-192   -144   
192    112    
176    224    
-16    -256   
224    224    
192    112    
-304   -208   
288    496    
-48    -304   
256    288    
-16    240    
272    64     
48     -48    
112    16     
16     -32    
160    352    
208    80     
-16    -480   
240    0      
0      304    
-64    -304   
224    -32    
-128   -976   
16     -16    
272    -368   
112    128    
144    96     
-272   48     
304    -256   
-64    -288   
64     -160   
16     -480   
64     16     
112    -16    
-272   -96    
-96    -128   
0      -64    
80     -208   
192    192    
16     -2624  
48     192    
16     256    
528    528    
-304   352    
112    288    
128    -64    
96     112    
-32    96     
-32    224    
-48    32     
-64    240    
32     96     
48     -224   
192    112    
-128   -384   
-16    112    
224    224    
48     144    
16     -48    
224    160    
-64    -16    
0      128    
48     48     
128    32     
0      176    
0      16     
112    256    
112    144    
288    128    
-160   -368   
80     192    
0      144    
32     304    
-16    16     
32     -208   
80     240    
-144   -112   
272    64     
16     -128   
160    32     
-16    -224   
-32    128    
64     -272   
-16    80     
64     -128   
64     -2000  
-176   144    
144    -2304  
-48    -112   
16     32     
176    -96    
-16    -240   
112    -624   
208    96     
-288   112    
32     -112   
144    112    
-160   -352   
96     -608   
160    96     
-80    -1184  
208    96     
-16    -272   
112    48     
-352   48     
96     -560   
32     -160   
32     -96    
144    16     
128    -784   
80     0      
32     16     
112    -96    
64     96     
32     16     
0      -112   
224    160    
144    -32    
-144   -32    
-400   -176   
0      -48    
128    -144   
-16    -128   
128    -80    
-80    -80    
64     -240   
80     -1968  
-80    -80    
208    -32    
80     144    
80     64     
64     128    
-192   368    
176    352    
-176   16     
-96    -640   
-272   -368   
160    336    
192    416    
192    -320   
-112   -128   
176    112    
0      16     
80     0      
64     176    
224    -192   
-112   96     
144    -16    
32     -80    
-16    80     
16     0      
-592   48     
32     -160   
32     -16    
96     -304   
-224   -96    
224    -304   
-32    0      
80     256    
0      80     
-96    -240   
80     -272   
-48    -192   
0      -304   
-128   -64    
256    -208   
-80    384    
-528   -144   
-592   -48    
-144   80     
-128   -48    
-48    -416   
-48    96     
128    -1744  
-64    96     
-48    -48    
-48    96     
256    528    
192    -16    
-288   -224   
352    48     
-656   0      
0      144    
-320   96     
144    16     
80     112    
48     -96    
48     16     
-144   -448   
160    48     
-96    48     
96     0      
176    160    
-176   144    
-448   -16    
240    32     
-176   400    
480    -112   
-304   96     
320    -272   
-176   0      
208    -96    
-208   80     
96     -608   
-160   240    
-208   -32    
-320   32     
-352   32     
0      -16    
-288   -48    
208    -112   
-112   48     
128    -32    
-272   -16    
-16    -208   
144    96     
64     -176   
-128   48     
288    -240   
-48    -64    
-64    0      
80     64     
-192   64     
256    -48    
-128   16     
160    -32    
-64    80     
-48    -64    
112    112    
-32    -32    
96     32     
-1136  -160   
-32    48     
-368   -240   
256    -80    
-16    64     
-192   16     
160    144    
-128   64     
-240   -368   
16     -144   
0      -144   
0      -336   
-48    0      
-48    -96    
-64    -16    
-128   -96    
160    80     
-208   16     
-64    64     
112    48     
-128   -32    
48     -96    
-272   0      
144    720    
224    144    
80     496    
-80    112    
-224   -272   
-240   -432   
-32    176    
-128   -144   
368    560    
-368   -128   
-112   -496   
-64    -32    
-16    32     
-96    416    
-64    -528   
-240   272    
-80    160    
-240   -32    
32     -64    
-160   -16    
64     -16    
16     128    
-16    0      
80     32     
-48    64     
-96    0      
-80    16     
80     0      
-336   -144   
48     -256   
-32    -208   
-592   -624   
240    432    
-256   208    
64     112    
-48    -32    
-128   16     
80     -112   
-96    -112   
-32    160    
-112   48     
-48    -256   
-128   -112   
64     -144   
-160   32     
32     0      
-176   -32    
-32    -48    
-416   -272   
96     128    
80     -32    
-64    112    
80     96     
-144   16     
16     48     
-32    32     
-224   -176   
160    -320   
16     208    
16     112    
-112   -304   
-48    -608   
32     -144   
-80    -336   
208    -160   
-80    -160   
144    144    
-96    192    
128    -64    
-32    16     
-16    176    
-80    32     
-48    48     
-48    128    
160    0      
-112   112    
64     -48    
144    160    
-288   -48    
272    224    
-32    224    
64     304    
128    80     
240    64     
-224   80     
0      96     
0      96     
64     112    
-272   -32    
80     64     
-208   672    
240    320    
-160   64     
-384   -128   
-192   16     
208    -32    
-256   -240   
224    -144   
0      -256   
208    96     
688    416    
-64    704    
224    128    
-240   -288   
144    -272   
208    224    
-96    112    
144    272    
432    720    
-512   -368   
-64    -912   
368    -224   
0      880    
176    -144   
144    48     
160    320    
-16    16     
-272   -160   
0      -48    
-256   -304   
-224   -464   
0      -736   
304    480    
-224   304    
32     -16    
304    448    
-336   176    
-256   -256   
-48    544    
224    656    
-224   80     
-80    -32    
-464   -1184  
0      144    
96     256    
16     240    
-80    -80    
-80    -80    
80     272    
48     336    
-192   -208   
224    -368   
160    16     
96     0      
-48    -32    
-80    -80    
112    48     
64     0      
-96    -64    
96     80     
0      464    
0      192    
96     224    
16     64     
16     64     
144    128    
-96    32     
80     -32    
-32    0      
176    32     
-32    -48    
-160   -208   
256    -432   
112    144    
-48    32     
32     96     
-64    -192   
160    128    
96     208    
-176   96     
256    224    
-256   -96    
48     0      
160    80     
-16    64     
-32    16     
64     176    
-48    16     
-192   96     
-80    80     
-144   -176   
-144   0      
384    -656   
-160   112    
-96    64     
128    176    
160    96     
-64    16     
96     -16    
0      16     
-96    32     
160    96     
-176   -48    
64     112    
224    32     
112    128    
-16    176    
-16    -384   
-16    96     
64     64     
128    320    
-192   64     
0      128    
256    80     
0      64     
16     48     
-32    80     
32     64     
16     144    
80     96     
-128   64     
96     -32    
-112   -800   
48     80     
96     -1104  
-64    32     
176    128    
224    208    
-160   -48    
96     160    
48     48     
32     64     
0      48     
128    96     
-112   32     
96     64     
16     96     
64     -144   
128    112    
0      -576   
-48    128    
128    -16    
48     160    
80     64     
-160   112    
32     112    
144    -48    
32     0      
32     16     
-176   48     
96     -32    
-16    112    
80     32     
48     96     
0      -368   
224    192    
-192   144    
32     80     
16     -16    
144    64     
-48    -32    
144    -64    
-32    64     
-32    80     
64     64     
112    0      
-64    64     
-16    -96    
176    64     
-336   -256   
448    -16    
-144   -800   
176    96     
-224   48     
320    48     
-208   -64    
112    112    
-144   32     
272    288    
-160   32     
64     0      
256    112    
-192   -224   
160    208    
32     -64    
16     48     
96     -288   
48     64     
48     192    
208    80     
-48    -32    
-64    -16    
112    64     
208    64     
32     128    
0      -128   
64     160    
-32    -560   
176    224    
176    -80    
-80    80     
288    32     
-16    80     
128    -80    
0      48     
96     176    
32     112    
80     64     
-48    -64    
176    112    
-80    -192   
112    160    
-16    -112   
80     64     
-32    -208   
272    96     
-16    -192   
64     80     
336    -400   
-288   240    
112    -192   
-32    -112   
96     48     
-96    -176   
64     112    
80     16     
192    160    
-80    -48    
160    128    
-224   128    
256    160    
64     48     
48     64     
-64    -48    
144    -608   
32     48     
48     -1472  
64     -736   
112    -32    
80     -112   
80     112    
64     -1312  
-96    -112   
48     96     
272    112    
-208   32     
224    192    
224    -80    
-208   -208   
432    -96    
-336   32     
64     -160   
176    -400   
-352   112    
-368   -528   
224    -128   
-432   -624   
464    16     
-352   -624   
128    80     
48     80     
528    224    
-256   -144   
-320   80     
-32    -208   
-128   -224   
128    -160   
112    48     
-304   -32    
-176   32     
128    -16    
0      -224   
64     -144   
144    144    
-96    -144   
80     -80    
16     -16    
80     -32    
0      80     
0      -80    
224    144    
-160   0      
208    -64    
-432   32     
144    -32    
-528   112    
16     -176   
48     0      
-32    -208   
416    320    
-176   48     
144    448    
-96    -48    
80     -224   
256    -288   
64     128    
16     240    
96     -176   
96     176    
16     64     
-992   -160   
16     96     
160    -240   
-112   -320   
496    128    
-320   -272   
368    144    
-176   -208   
256    304    
-48    -96    
112    64     
0      48     
64     -48    
-16    144    
96     256    
-544   -208   
192    16     
-208   192    
112    32     
48     112    
-32    -160   
48     112    
64     -272   
128    96     
-112   48     
0      -48    
48     64     
80     -32    
-32    0      
32     -32    
-112   16     
16     -32    
-128   64     
320    112    
-912   112    
112    -400   
128    -80    
-48    -864   
128    240    
-64    96     
64     -128   
-256   0      
32     -64    
-256   -48    
80     -64    
-176   96     
-16    -64    
-48    -48    
112    -224   
-128   -80    
208    -288   
-80    96     
96     -672   
64     64     
-208   96     
80     80     
-208   -288   
144    128    
16     96     
-192   16     
64     -80    
-80    -16    
-752   48     
96     -112   
-160   112    
128    -64    
-352   -320   
432    -1008  
176    -112   
-48    -48    
-112   -544   
64     -144   
128    96     
-32    80     
112    64     
-128   -32    
112    -96    
-96    16     
-496   -48    
64     64     
-336   -112   
112    112    
64     16     
-288   -32    
48     16     
-32    240    
-16    416    
-1040  672    
-112   256    
-32    -128   
-128   -96    
-64    -128   
176    144    
-96    48     
-176   -144   
-400   -448   
160    -864   
112    -240   
480    848    
-208   304    
16     -304   
80     -176   
-224   16     
224    32     
-128   240    
256    416    
16     496    
64     272    
16     -336   
64     112    
-48    -32    
-240   -272   
272    -32    
-48    512    
-80    32     
112    -176   
-48    16     
-128   -64    
-112   176    
-48    208    
-112   176    
-80    -160   
112    48     
112    48     
-176   96     
0      -96    
-96    -336   
304    144    
48     528    
128    272    
-176   16     
352    384    
-176   288    
48     192    
-736   -48    
144    96     
-288   -144   
96     48     
-224   272    
368    80     
-128   64     
128    16     
-160   48     
80     -32    
-384   -80    
400    -224   
-416   -176   
768    160    
-304   160    
0      -96    
0      112    
304    192    
-528   224    
224    -80    
-176   272    
112    0      
-432   32     
336    0      
-64    96     
16     48     
-176   -16    
96     -48    
-240   -48    
144    96     
-304   64     
64     240    
-128   64     
16     176    
-288   -48    
96     -16    
-48    128    
32     0      
-176   160    
192    16     
-112   0      
0      16     
-240   -80    
96     -96    
-16    176    
16     16     
80     160    
-368   -64    
272    256    
-1216  32     
-80    32     
48     128    
-96    80     
128    64     
-64    96     
64     32     
-48    -48    
80     -48    
352    256    
-224   144    
-192   -112   
-32    16     
-240   -32    
-128   16     
80     64     
176    160    
80     64     
-80    64     
128    80     
-80    96     
-80    96     
48     144    
80     144    
-272   48     
112    32     
-176   48     
192    80     
-48    32     
128    96     
0      176    
16     32     
-48    -16    
-128   96     
192    48     
-112   48     
128    -32    
64     0      
320    80     
-368   -16    
192    112    
-128   96     
192    16     
-48    16     
208    224    
-208   64     
-32    48     
128    160    
-160   -160   
-80    0      
304    48     
-80    176    
64     -112   
-288   128    
304    144    
-336   128    
144    32     
32     16     
-96    0      
64     -112   
-32    112    
80     64     
0      176    
256    160    
-128   80     
16     80     
64     16     
-96    -144   
160    144    
-96    224    
64     128    
16     16     
64     48     
-176   -16    
-32    96     
48     80     
-80    64     
0      144    
176    80     
-112   -32    
-16    -80    
80     96     
128    336    
-96    -32    
16     -144   
48     128    
64     0      
-112   128    
-32    96     
0      128    
48     64     
176    96     
-32    0      
-144   64     
224    64     
48     96     
64     64     
-96    -64    
272    -48    
-208   16     
224    32     
-288   96     
0      -272   
-112   96     
112    112    
-16    80     
48     32     
-64    -48    
80     -96    
48     -80    
48     -80    
288    144    
-192   -64    
160    144    
-48    -144   
-32    48     
64     -96    
64     -208   
240    208    
-16    80     
64     112    
0      0      
80     112    
0      80     
-16    48     
80     32     
0      96     
-64    32     
128    336    
96     144    
32     128    
-16    32     
160    -448   
-192   112    
160    -1456  
-112   0      
160    32     
-64    112    
272    48     
-192   128    
16     -128   
112    160    
240    224    
-320   64     
-16    -112   
112    -80    
48     48     
-48    -80    
48     224    
-288   -240   
352    64     
-32    0      
32     -16    
-80    80     
16     144    
-16    -208   
80     64     
0      48     
-112   -16    
-64    208    
0      -112   
80     48     
304    128    
-224   304    
64     -480   
-384   48     
240    -624   
-176   16     
-64    -16    
32     -112   
112    -48    
112    224    
192    192    
-224   192    
-112   128    
32     -64    
352    128    
-144   -96    
208    176    
144    -400   
-144   -48    
-112   -1136  
-32    -256   
-64    -656   
80     128    
80     112    
-48    48     
192    192    
-48    160    
192    144    
-48    -128   
240    80     
-32    -176   
64     192    
48     -544   
160    224    
-16    -352   
272    224    
16     -176   
208    224    
32     96     
112    48     
-16    96     
48     96     
32     96     
16     144    
80     16     
-256   -128   
288    -464   
192    160    
464    1008   
-336   48     
32     -480   
-32    -528   
112    336    
48     48     
-16    240    
144    176    
48     -96    
-64    224    
304    -128   
-288   144    
160    -304   
-48    0      
96     -144   
64     80     
-16    -176   
48     -16    
-64    -128   
128    64     
208    624    
176    -720   
-144   -2192  
112    -80    
-80    32     
288    16     
16     64     
48     -48    
112    80     
-64    -32    
32     64     
96     16     
32     -240   
32     80     
80     96     
32     48     
32     -48    
-288   -624   
192    -272   
-144   -64    
208    16     
16     -336   
64     -128   
96     -400   
-48    -96    
160    -16    
0      32     
144    192    
64     16     
48     -160   
-80    128    
-80    32     
64     16     
-448   -32    
-48    -112   
160    -48    
16     -144   
32     -144   
80     -288   
80     32     
-64    -144   
256    -176   
256    256    
32     416    
208    -64    
144    224    
-32    160    
0      -368   
-288   -320   
112    -400   
-304   -112   
416    256    
-96    288    
400    608    
-96    352    
144    -416   
-208   -16    
224    80     
-32    -16    
-32    48     
224    -80    
-64    80     
208    528    
-576   256    
-192   -400   
-992   -80    
-96    16     
160    -32    
624    80     
-592   -48    
160    -1760  
128    624    
64     144    
-48    -336   
112    16     
-64    96     
-96    48     
0      -272   
-16    96     
368    416    
-480   96     
128    -304   
208    -496   
96     176    
112    64     
224    48     
-256   -48    
48     -832   
-80    16     
48     144    
-128   -112   
-48    -112   
112    64     
-144   64     
224    -128   
-480   -112   
32     -272   
-592   16     
160    80     
-16    80     
208    -112   
-80    -64    
64     -1040  
48     96     
-128   16     
-160   -48    
128    48     
48     32     
-256   -16    
-240   -32    
-288   -704   
-432   -704   
272    -16    
-288   -16    
-16    0      
-128   -320   
176    192    
-80    -704   
-32    80     
-80    -32    
-32    -48    
-48    80     
-112   -128   
-64    -32    
0      -32    
-48    32     
-112   48     
144    0      
80     -80    
-64    128    
272    -208   
-176   -128   
176    -80    
160    80     
-64    -16    
144    -96    
-96    80     
-80    -512   
-16    240    
32     -176   
-80    0      
160    192    
-64    -64    
-16    -320   
32     -176   
112    -176   
144    0      
144    160    
-240   64     
-16    32     
48     -64    
-80    -112   
32     16     
336    112    
112    -32    
256    128    
80     80     
-192   192    
-848   -96    
192    160    
176    -160   
96     96     
112    112    
-752   -64    
32     -32    
144    -32    
48     64     
48     32     
48     64     
-288   -16    
16     -48    
-352   -64    
160    128    
-160   0      
64     32     
0      0      
-272   64     
32     32     
-224   16     
-64    32     
-384   0      
-32    -64    
-544   -112   
-112   16     
112    0      
32     16     
16     -80    
48     144    
80     -176   
32     -336   
-176   -240   
224    112    
-432   16     
80     80     
-112   -16    
64     80     
-80    -80    
-224   16     
384    224    
-560   80     
-32    -288   
-160   -144   
96     128    
-64    32     
112    224    
-112   48     
-48    -64    
32     16     
112    96     
-320   -512   
112    16     
-16    64     
-208   48     
144    80     
-128   -80    
32     160    
-448   -48    
64     128    
-144   192    
112    128    
-48    -272   
144    16     
-48    16     
-224   -80    
96     -96    
96     128    
48     64     
-48    112    
64     96     
-304   -32    
-16    0      
-336   0      
80     64     
32     -32    
32     96     
-144   -192   
-224   -48    
96     48     
-48    -48    
-96    160    
32     16     
-32    144    
-192   -80    
-80    48     
-224   16     
80     160    
-256   -80    
80     64     
-112   -112   
32     128    
112    144    
-192   80     
-16    -64    
0      16     
64     -32    
-144   16     
208    -32    
-128   0      
224    128    
-176   48     
208    112    
-160   0      
16     32     
0      48     
80     256    
80     224    
32     160    
-64    80     
-96    160    
-80    208    
-16    -48    
16     96     
48     80     
-128   96     
-32    -48    
-176   -288   
-160   -496   
448    32     
-64    160    
96     -32    
-80    -32    
352    432    
-160   448    
-96    192    
0      112    
96     192    
-48    -32    
96     288    
-272   -176   
0      -96    
96     224    
-112   80     
-80    128    
0      16     
368    176    
-176   160    
96     0      
32     16     
0      -112   
256    -112   
112    -144   
64     64     
-112   -48    
96     160    
16     64     
112    384    
-48    208    
64     272    
-304   320    
-48    -128   
-128   288    
112    96     
-96    272    
192    720    
160    160    
-352   -496   
384    16     
-352   -32    
176    176    
-256   0      
112    128    
-32    144    
-48    128    
160    128    
-16    192    
224    528    
80     496    
0      -48    
-80    -448   
16     -240   
176    64     
-128   64     
80     128    
160    208    
-176   256    
336    352    
-80    48     
112    64     
-144   -208   
288    128    
-32    192    
16     64     
288    -48    
-192   -128   
448    528    
-128   928    
-80    -688   
288    -48    
-288   160    
64     -224   
0      80     
-112   -160   
80     64     
16     688    
0      -128   
-64    -304   
64     80     
-272   448    
704    272    
-352   448    
-48    0      
-32    -528   
-32    96     
-176   208    
48     -208   
-64    -448   
-48    32     
64     112    
80     80     
-96    48     
48     48     
-64    -96    
32     144    
400    320    
-304   -224   
96     144    
-448   -176   
-304   -480   
208    -112   
288    224    
32     528    
80     176    
-192   16     
128    64     
-160   -48    
176    80     
-64    -96    
-128   -144   
112    48     
-64    80     
16     48     
0      128    
64     112    
80     288    
112    176    
-112   -336   
176    96     
-32    -848   
32     128    
96     48     
-128   -208   
448    48     
-352   128    
368    176    
-16    80     
-96    -16    
144    96     
32     80     
16     -128   
32     64     
32     -272   
64     96     
-48    -592   
432    192    
-224   240    
288    192    
-256   -16    
240    -176   
-64    -64    
-96    144    
0      -128   
-64    -48    
-192   -192   
64     -480   
16     -32    
176    0      
-112   -32    
80     -272   
336    384    
0      -608   
-192   48     
272    -224   
-96    400    
240    -192   
-176   32     
32     160    
272    -144   
-144   176    
176    32     
80     160    
-96    -32    
48     224    
48     656    
80     240    
32     -480   
112    32     
-240   -48    
96     448    
-64    32     
0      -16    
0      112    
64     -16    
96     112    
112    -112   
-32    96     
192    128    
-48    160    
-16    -944   
256    544    
-112   288    
384    480    
-192   -48    
16     -208   
48     48     
400    176    
-192   -176   
48     -368   
256    96     
-144   -272   
224    144    
-48    -112   
144    320    
16     -32    
-16    -64    
128    -336   
128    -80    
-80    144    
48     48     
-64    208    
112    192    
32     144    
32     -256   
48     48     
-96    -384   
64     32     
48     -96    
-96    96     
128    -16    
-16    16     
176    32     
48     80     
-16    176    
240    -208   
80     160    
-48    -704   
160    -672   
192    240    
-256   -2160  
80     0      
48     -48    
64     -112   
48     144    
0      -320   
240    208    
-256   -80    
192    -704   
96     560    
-272   -272   
-352   -16    
32     -48    
176    -32    
32     48     
240    48     
208    -96    
144    -432   
208    -16    
-16    -1088  
16     -112   
64     -304   
-48    -208   
176    -32    
192    224    
0      112    
-256   -80    
-192   -96    
96     64     
-160   128    
-48    -144   
-32    -128   
272    -224   
80     0      
128    -368   
-48    96     
336    64     
-128   80     
64     -112   
160    128    
48     176    
80     64     
-208   -176   
304    -80    
-816   0      
112    -272   
304    -256   
32     -272   
240    16     
160    -224   
176    -160   
-112   -464   
-128   48     
32     -144   
-80    -32    
32     -288   
80     -64    
-144   -352   
368    64     
-240   16     
400    -16    
-256   16     
272    48     
160    -80    
176    -32    
64     -128   
96     -240   
192    80     
160    -32    
128    80     
128    0      
16     -32    
-64    16     
128    80     
-176   96     
32     176    
208    96     
-128   -112   
-336   48     
-192   -176   
64     -32    
32     -80    
48     48     
144    -416   
-16    160    
-32    -48    
-192   -240   
-16    -32    
224    -64    
-16    0      
0      -80    
192    48     
32     -64    
-944   -48    
128    160    
-48    48     
224    -192   
-48    -80    
-32    -864   
80     -192   
-144   -32    
176    -96    
-160   32     
128    32     
-352   -208   
96     -64    
-288   -160   
-80    32     
320    496    
64     176    
-16    -48    
16     -128   
224    176    
-272   -576   
80     -320   
-96    160    
240    64     
-208   80     
320    80     
-176   192    
96     0      
-112   16     
96     -112   
-272   32     
16     -144   
48     112    
-32    -208   
-64    -64    
-64    64     
96     64     
-160   48     
128    32     
-304   -16    
16     48     
-32    -64    
-16    32     
-32    16     
-32    -160   
-160   -176   
208    -208   
64     80     
-1328  -144   
-64    32     
128    -112   
-80    -16    
-64    144    
-688   192    
-96    0      
16     32     
240    240    
-160   144    
-288   400    
-688   288    
16     400    
-96    64     
-208   0      
176    -32    
-48    -96    
32     224    
-160   160    
-32    224    
-224   48     
80     64     
-320   -176   
80     0      
32     0      
80     80     
-112   16     
320    432    
48     560    
-160   -48    
0      -256   
-192   32     
-80    -112   
-32    48     
-80    288    
-176   -368   
-160   -16    
-352   208    
-80    -624   
-1376  384    
-144   16     
-96    -144   
64     -272   
0      -16    
-96    80     
-240   -464   
-48    -16    
32     464    
-80    80     
-32    -64    
-176   -64    
-80    64     
128    -112   
-288   240    
-64    144    
-64    -48    
-96    -256   
48     512    
-64    64     
-16    -32    
112    160    
0      -160   
-64    -32    
-48    0      
-96    48     
208    160    
-96    320    
-80    400    
-16    -80    
-48    96     
-144   80     
-2192  -400   
96     -48    
-48    -16    
112    336    
80     -336   
-176   -352   
80     624    
-176   64     
-32    -32    
-80    128    
-16    -352   
352    160    
-176   256    
112    -144   
-80    96     
-608   640    
-352   960    
-288   -656   
272    -64    
240    384    
-208   224    
-256   -208   
208    -112   
-352   112    
-176   -400   
352    -48    
-176   240    
-80    80     
-128   -224   
320    -144   
-352   80     
496    48     
-208   -432   
-176   544    
-144   -672   
16     304    
48     -144   
112    -128   
-16    704    
-160   -224   
48     -64    
-32    336    
-16    -208   
-192   272    
-240   -448   
608    -208   
-16    432    
-48    -176   
352    16     
16     416    
96     80     
224    80     
-48    32     
16     32     
-320   -80    
192    64     
-112   16     
16     48     
16     32     
256    320    
-560   -416   
16     -416   
64     144    
48     -336   
192    240    
80     -272   
48     256    
-16    64     
-32    -144   
176    288    
-32    80     
-160   -80    
160    112    
-272   96     
-16    -560   
-128   -128   
352    336    
-176   -192   
112    256    
0      -96    
-32    176    
224    768    
16     -432   
-368   -512   
512    -16    
-64    288    
96     560    
64     208    
-64    32     
0      240    
-128   -16    
80     48     
-48    64     
16     64     
80     48     
-16    16     
-16    80     
16     48     
0      112    
-16    32     
-160   -240   
16     -64    
112    224    
240    496    
-352   144    
64     -272   
176    160    
-16    48     
64     -16    
-96    -144   
128    0      
112    304    
-128   64     
176    -64    
-208   -64    
96     -288   
176    480    
48     416    
112    272    
-144   112    
-48    -48    
0      -128   
-80    -160   
144    -16    
160    96     
-48    48     
48     -32    
16     80     
-16    48     
-64    -112   
144    64     
-144   -128   
128    -624   
-160   -416   
384    -432   
-96    160    
-16    112    
96     144    
80     224    
0      176    
0      160    
128    96     
-96    0      
96     112    
0      96     
96     176    
-112   -32    
48     -16    
192    -64    
32     -704   
144    80     
32     64     
192    16     
32     112    
352    304    
-240   64     
96     64     
176    80     
64     80     
32     0      
-16    144    
-272   304    
272    96     
32     80     
320    -160   
-96    176    
16     48     
32     80     
-16    0      
112    -64    
64     80     
16     -48    
240    0      
-96    128    
144    -416   
-48    48     
160    16     
80     -16    
-32    32     
128    -224   
-80    -16    
-224   -2672  
32     0      
32     128    
-64    96     
-32    -48    
80     96     
-64    -304   
-64    16     
-64    -64    
288    128    
32     96     
128    -144   
64     64     
80     192    
384    624    
-368   -320   
176    -64    
-176   -144   
80     80     
0      -160   
-16    192    
32     -64    
224    0      
96     96     
32     320    
176    256    
64     0      
-64    16     
-32    -80    
96     16     
16     -48    
192    240    
320    -2464  
-176   96     
-80    16     
-176   0      
16     80     
48     288    
-176   240    
112    160    
-32    80     
96     -80    
-16    -176   
144    -400   
96     -256   
32     16     
-96    -64    
64     -608   
32     224    
-64    -384   
160    368    
-96    64     
96     96     
-432   -560   
416    144    
-160   224    
-144   -16    
-160   64     
112    -192   
80     64     
-32    0      
112    128    
-112   -32    
128    128    
0      80     
112    128    
-80    64     
144    128    
-32    -80    
-128   112    
96     32     
64     -432   
0      64     
144    -48    
96     80     
80     0      
-16    80     
144    -96    
-80    -48    
-80    -32    
96     192    
-80    -48    
64     -32    
32     224    
368    32     
-16    -1504  
-16    -80    
240    112    
0      -176   
-16    -16    
96     -96    
96     32     
-176   -912   
112    128    
-16    16     
32     -256   
0      64     
-16    -592   
160    80     
48     -48    
128    -416   
48     -64    
224    -736   
48     80     
-16    160    
16     -192   
32     64     
144    -32    
-48    -336   
0      128    
240    64     
-128   32     
-224   0      
16     -144   
-80    64     
96     -224   
144    176    
-128   -112   
-176   48     
64     -160   
224    -32    
144    48     
80     48     
48     -128   
176    192    
-144   -64    
-48    192    
80     272    
-96    -336   
-256   208    
-64    -32    
-64    -688   
32     -960   
112    16     
48     -336   
80     96     
64     80     
-32    -320   
80     48     
-32    368    
192    96     
-16    48     
-160   -208   
128    -192   
-160   16     
-16    -112   
208    -64    
64     32     
96     400    
128    224    
48     80     
-32    -912   
208    208    
-80    -48    
128    -80    
-128   -64    
304    -256   
-80    112    
96     -32    
-224   0      
-96    -176   
-720   -208   
-80    144    
128    64     
112    -192   
-96    16     
64     -496   
32     80     
32     -16    
208    288    
48     -320   
336    432    
-480   -192   
160    -624   
0      -112   
32     96     
96     272    
-32    -432   
-368   -144   
224    48     
-288   -80    
144    -400   
416    288    
0      -416   
48     128    
64     -256   
64     -560   
-208   -112   
80     -304   
-256   192    
528    352    
-560   240    
0      -128   
-768   -288   
208    96     
-144   144    
-80    -224   
-32    16     
160    -768   
144    0      
-32    320    
-32    400    
-80    -256   
-208   -144   
-48    16     
-48    -112   
-96    -64    
-32    0      
-112   208    
-176   176    
240    96     
-112   -352   
-176   -64    
-176   -1200  
-112   -64    
-272   16     
256    304    
-608   192    
64     -528   
-160   -288   
320    736    
32     -96    
-288   -608   
80     -288   
304    336    
-80    256    
-32    -560   
272    -256   
80     336    
144    96     
-208   -224   
-208   -832   
-112   592    
80     -176   
-160   16     
-64    -400   
112    -48    
-64    -80    
128    416    
-912   336    
-64    -960   
-672   -112   
-176   256    
-32    -80    
-80    32     
-32    64     
-640   272    
16     240    
-112   -128   
80     -400   
96     352    
-32    336    
-352   -448   
16     -128   
-32    -192   
-160   -208   
-80    -288   
-128   64     
-224   -256   
320    368    
-304   -144   
-64    80     
-48    32     
-432   -16    
-32    112    
-208   -208   
128    32     
-672   -736   
352    240    
-64    -48    
208    16     
80     176    
-320   192    
64     -112   
176    176    
-224   352    
128    -192   
-160   0      
176    496    
-96    -304   
-1952  80     
-32    192    
16     -384   
96     288    
0      128    
-128   -272   
160    112    
-64    -128   
80     208    
-32    416    
0      128    
-96    -288   
-256   -16    
-160   0      
160    592    
-704   96     
112    -224   
32     192    
80     320    
-176   -192   
-32    96     
16     -160   
48     304    
-144   -128   
-160   -80    
-224   192    
128    -64    
-48    48     
-160   0      
32     16     
-224   -48    
128    96     
-2064  -112   
80     112    
16     -32    
-128   272    
-64    288    
80     272    
48     176    
-208   192    
-144   112    
48     -80    
-16    -48    
32     64     
-64    32     
-224   -128   
96     160    
-704   48     
-32    176    
-112   -64    
192    80     
-48    0      
-208   0      
256    240    
-112   80     
-48    144    
-16    96     
80     96     
-64    112    
64     128    
-336   -96    
80     144    
208    0      
-48    80     
96     -32    
-128   64     
80     48     
-128   80     
0      32     
-160   -272   
48     -64    
64     -32    
-256   0      
64     16     
64     -48    
-64    16     
160    96     
-112   16     
96     32     
-16    112    
176    64     
16     64     
160    96     
48     64     
0      80     
64     64     
-64    -16    
144    -336   
-80    -320   
384    208    
-400   208    
208    160    
-160   -64    
0      176    
144    64     
-48    -48    
288    -96    
128    448    
-240   0      
-48    64     
64     -16    
80     0      
0      208    
160    80     
-112   -160   
-128   -256   
128    -128   
-96    96     
96     192    
-48    80     
144    208    
32     -64    
-160   -160   
224    -224   
64     48     
192    -64    
-96    80     
208    48     
-64    160    
-256   160    
-176   -96    
16     80     
-48    16     
64     64     
-160   -144   
0      -80    
-112   -160   
144    80     
-64    80     
-304   -608   
256    96     
0      320    
-208   240    
-112   176    
0      128    
16     176    
64     224    
-16    48     
48     -48    
-96    32     
-64    48     
128    112    
48     16     
80     128    
-16    16     
-160   -160   
64     -192   
112    64     
272    -32    
-16    224    
-48    48     
0      112    
-48    48     
-160   192    
176    -16    
-256   16     
512    64     
-224   48     
432    128    
-272   -16    
144    64     
16     80     
160    96     
0      48     
208    48     
-256   128    
112    -944   
-176   112    
0      0      
64     -96    
176    128    
96     128    
-96    80     
16     48     
-32    -128   
96     128    
128    144    
-112   96     
32     192    
-144   112    
192    128    
-64    -352   
64     128    
112    48     
128    144    
128    48     
176    208    
-112   144    
112    160    
128    48     
80     96     
32     80     
-80    96     
-144   -288   
-48    -128   
48     -48    
16     -288   
64     80     
144    0      
-64    -64    
128    16     
128    80     
96     80     
16     144    
16     -160   
-32    -240   
16     -80    
176    240    
-96    -64    
128    80     
-128   16     
-96    -1168  
-80    64     
160    -2624  
80     -112   
-128   -224   
64     -320   
176    128    
-256   -224   
96     -48    
144    144    
-48    -48    
-16    32     
144    144    
-48    -96    
96     96     
0      -48    
144    128    
-48    -288   
80     80     
32     -336   
80     112    
-48    -96    
112    -176   
-32    -256   
0      -48    
-224   -304   
176    560    
0      0      
-160   -144   
240    -80    
-64    288    
-32    -256   
96     -400   
96     -144   
-96    -448   
288    -16    
-144   144    
80     -48    
-48    16     
112    256    
-48    -224   
64     -96    
128    192    
16     -96    
-16    -48    
176    0      
-32    256    
80     -16    
-80    16     
-96    -320   
96     160    
32     112    
0      48     
80     64     
144    352    
-16    80     
-128   -992   
208    208    
-80    256    
64     272    
80     96     
-32    96     
64     -144   
0      80     
96     -64    
-64    48     
160    128    
48     112    
80     32     
32     80     
0      64     
48     -144   
112    128    
48     -192   
16     80     
-32    -272   
-16    -272   
160    -352   
-16    48     
160    -144   
64     32     
-48    64     
160    208    
-304   128    
240    -1296  
-192   176    
400    0      
-208   -400   
-48    48     
32     -32    
-48    -352   
-160   -48    
-48    -176   
208    304    
48     160    
-112   160    
192    -80    
80     -736   
288    -80    
-448   96     
32     -608   
288    96     
16     64     
160    320    
-208   -112   
336    64     
-96    128    
-16    -176   
-80    -304   
112    -272   
224    -112   
96     224    
-48    112    
224    -144   
-144   272    
-320   -16    
144    -32    
320    -432   
-32    144    
80     -112   
32     -400   
304    -96    
-64    -128   
288    -208   
208    416    
384    448    
-128   368    
-160   -448   
368    -288   
-160   240    
176    16     
-624   -160   
32     -80    
80     256    
176    -160   
32     16     
128    -160   
96     64     
304    -288   
-16    192    
208    -144   
-128   48     
592    320    
-480   -288   
432    -304   
16     496    
-112   64     
384    -672   
304    -560   
192    -336   
48     144    
64     -208   
272    -128   
16     -1056  
288    176    
-96    48     
240    112    
0      -208   
64     -288   
-192   -176   
64     -128   
-640   -272   
32     -320   
-496   -48    
-48    -224   
-224   -144   
48     -176   
192    16     
-64    -304   
0      128    
208    -64    
-224   96     
128    128    
-112   -160   
80     -16    
-176   -128   
-176   -64    
112    -112   
-352   16     
32     32     
-1664  -224   
-192   -400   
-32    48     
-160   -272   
288    -32    
128    -288   
112    96     
48     128    
224    16     
-144   32     
16     -64    
-160   -64    
48     -112   
-144   -32    
64     -112   
-192   64     
208    -112   
-32    80     
-96    -208   
144    128    
48     -1232  
-64    -208   
-512   -128   
144    48     
-128   144    
96     112    
-288   -96    
352    64     
-288   -224   
144    -416   
-96    -144   
144    -128   
112    16     
-32    -272   
16     144    
32     144    
-208   64     
32     -80    
64     48     
-96    -112   
176    -272   
-112   -16    
256    336    
-224   32     
80     32     
-320   192    
176    112    
-112   0      
-1824  -160   
240    32     
-16    80     
-672   80     
0      -112   
-624   -112   
-16    16     
208    32     
-96    16     
112    48     
-16    16     
112    64     
-144   48     
-208   -240   
16     80     
96     -16    
-304   -16    
16     144    
-144   -16    
16     112    
-320   -48    
-208   -48    
320    0      
-112   -48    
96     0      
272    288    
-576   -256   
144    32     
-64    -112   
48     112    
16     -112   
-96    0      
112    224    
-128   -48    
-336   -112   
144    16     
-80    32     
16     144    
48     384    
-208   176    
-160   112    
-192   -80    
32     224    
-32    32     
128    144    
-128   -64    
-48    -192   
-32    -272   
-48    0      
32     64     
-176   32     
16     80     
-352   16     
-240   -96    
-144   -176   
48     48     
-96    32     
-80    144    
-64    -144   
144    144    
-16    240    
-160   128    
16     80     
-128   48     
96     48     
-224   -64    
-32    -176   
-240   144    
-32    0      
-720   32     
160    80     
-192   -16    
-112   160    
32     -288   
-80    16     
256    112    
-336   80     
-160   -304   
208    96     
-32    144    
0      48     
16     0      
-64    0      
208    80     
-80    48     
112    112    
-896   272    
-320   304    
-64    -144   
-112   96     
48     0      
112    0      
-304   224    
96     144    
-288   16     
224    16     
-144   144    
-64    -96    
-48    128    
-160   -32    
64     32     
-496   -32    
144    176    
-32    160    
128    16     
-64    112    
0      96     
128    0      
-144   16     
64     32     
80     112    
-112   96     
-16    32     
-368   -16    
-80    -128   
-208   -32    
-96    -96    
80     160    
64     80     
-80    80     
96     32     
176    144    
-224   112    
32     16     
48     0      
112    96     
32     272    
-304   192    
64     192    
-240   -80    
272    112    
-80    96     
-144   -192   
96     96     
240    -16    
-16    96     
80     64     
176    208    
112    48     
-192   -288   
-64    -160   
432    80     
-144   176    
208    272    
-144   64     
96     0      
-128   -32    
-64    -128   
-16    48     
48     0      
80     80     
-64    112    
80     16     
64     0      
64     -16    
96     32     
-112   112    
-256   -256   
160    160    
-112   224    
112    320    
32     128    
-32    128    
208    32     
16     384    
-304   -160   
448    -16    
-400   144    
192    80     
128    256    
0      -16    
96     -224   
-304   0      
-112   -528   
224    704    
-112   -144   
96     368    
48     -96    
256    -80    
-80    256    
-64    48     
272    64     
-64    96     
112    0      
-80    96     
208    48     
-160   64     
32     -16    
48     112    
0      64     
-64    -16    
128    -80    
-80    48     
160    96     
-288   -272   
128    -32    
-48    -48    
-16    48     
32     -32    
-16    -128   
-128   -80    
176    -96    
-208   -32    
256    112    
-352   -64    
352    320    
-176   256    
48     80     
64     48     
32     32     
48     64     
32     128    
112    64     
-32    64     
0      208    
64     624    
96     272    
-160   -64    
48     48     
0      80     
-16    -16    
-80    32     
160    112    
112    96     
48     32     
0      32     
192    -80    
128    320    
48     256    
128    16     
-144   64     
176    144    
-144   -16    
80     64     
-144   -112   
192    -672   
-96    144    
128    32     
-80    96     
144    0      
-48    144    
80     80     
64     208    
-176   0      
400    112    
-112   176    
-16    112    
-96    0      
128    -64    
80     144    
224    -272   
-112   144    
64     64     
-128   416    
320    -96    
-352   -208   
176    16     
-80    48     
-144   240    
64     -48    
16     -192   
160    128    
-96    224    
272    -16    
48     352    
-16    -64    
16     -160   
32     -560   
-96    144    
592    448    
-464   32     
16     96     
16     -80    
80     -112   
-256   448    
160    272    
0      -64    
32     80     
160    384    
-96    80     
48     -352   
0      -32    
224    -272   
-112   128    
-32    -1536  
176    144    
-80    112    
144    112    
-80    -16    
272    48     
-192   32     
272    336    
64     208    
48     -128   
80     400    
-112   16     
160    -32    
-48    -256   
128    0      
16     -720   
64     -256   
-48    -144   
368    416    
-128   208    
-80    240    
144    208    
-112   32     
-32    96     
464    48     
-400   336    
112    -80    
-320   96     
240    -240   
0      176    
128    -384   
-208   16     
-32    96     
96     144    
-64    176    
80     144    
80     192    
-128   -96    
-32    112    
-64    -48    
-160   32     
112    -256   
32     80     
64     -192   
-112   32     
-224   -144   
240    64     
128    208    
-144   112    
-112   176    
288    32     
-16    128    
192    -48    
-128   176    
240    -48    
-48    128    
80     -128   
0      112    
224    96     
-128   128    
64     -48    
-16    80     
-48    32     
112    -2288  
80     80     
240    -736   
-160   -368   
64     48     
0      -1664  
-32    -80    
128    -592   
112    -96    
144    112    
144    80     
16     48     
-112   -160   
160    -592   
0      64     
128    80     
-224   -240   
-336   -112   
160    -128   
-16    -144   
80     -448   
32     -16    
64     -512   
-48    32     
32     192    
176    -176   
-144   16     
48     -208   
240    -160   
96     -80    
80     -128   
-16    16     
-32    -112   
112    64     
-480   -32    
208    32     
-160   -192   
-96    -16    
192    -96    
-224   -896   
32     -176   
96     -432   
336    384    
-208   -48    
32     208    
160    -176   
-48    -96    
128    -80    
-144   -64    
48     -32    
112    96     
272    176    
-96    240    
-192   -112   
48     -720   
192    -16    
64     -144   
-160   -176   
128    64     
-32    96     
-224   32     
112    -80    
-80    -64    
112    64     
-192   -16    
-48    -464   
64     -160   
112    -80    
-112   0      
128    32     
-208   16     
112    -512   
64     48     
-32    48     
-176   -112   
272    -80    
64     112    
-176   192    
80     0      
-560   -112   
256    -32    
-1072  0      
96     -64    
-208   288    
352    48     
-400   -336   
224    -624   
-96    48     
-32    64     
0      144    
192    160    
-96    128    
0      112    
176    -48    
-160   0      
144    -112   
-256   -32    
80     32     
-784   32     
-16    -192   
80     16     
-64    -688   
160    -112   
64     -1152  
-32    -176   
-96    -32    
128    -32    
-128   -128   
32     -32    
16     32     
-80    -32    
64     288    
80     -48    
-432   48     
160    -416   
32     48     
128    -272   
80     32     
128    -608   
128    64     
-160   16     
80     -16    
-48    -64    
176    128    
-208   -96    
0      -176   
-176   -16    
-16    -64    
-192   32     
16     -80    
160    80     
16     -240   
80     48     
-128   112    
80     -32    
-304   -272   
-64    -192   
16     80     
-48    -48    
-128   0      
352    48     
-272   176    
0      -32    
-128   144    
-656   -16    
-48    -80    
-256   -304   
-832   -32    
-160   32     
-160   0      
-64    48     
-256   -16    
-192   48     
-48    32     
-224   -48    
48     32     
-144   -16    
-400   -112   
-352   -368   
-32    -288   
-48    224    
-288   -112   
-384   -16    
-96    112    
64     16     
-336   -112   
-176   96     
-112   32     
-560   32     
-48    -32    
32     64     
-96    112    
-240   -112   
-144   -64    
0      -304   
192    0      
-176   96     
0      160    
16     192    
-304   -16    
112    176    
-336   112    
-80    64     
-240   -208   
256    32     
-1248  -32    
96     320    
80     -144   
-32    -224   
0      -480   
160    -272   
288    48     
-80    -256   
-16    -592   
144    288    
32     112    
48     48     
-32    48     
-304   112    
-128   -80    
-624   -160   
64     384    
0      384    
-176   0      
-112   176    
-64    -544   
-352   304    
112    -400   
48     272    
-144   464    
0      -368   
128    0      
-144   352    
-128   -128   
-16    -240   
-64    240    
48     144    
48     48     
32     0      
-32    0      
80     320    
-208   128    
80     192    
112    192    
-16    96     
-128   -144   
16     -48    
-16    16     
0      112    
240    128    
-416   -48    
160    112    
-1360  -64    
160    112    
-256   32     
96     96     
16     48     
-96    32     
-16    48     
-128   -16    
32     80     
-16    32     
-144   -80    
256    -176   
-80    128    
-320   -64    
144    64     
-272   -128   
48     112    
-16    48     
240    48     
-96    208    
0      0      
-48    48     
-64    32     
32     -16    
-32    -80    
48     -64    
0      48     
-32    96     
-144   0      
112    80     
-224   -16    
96     -16    
-128   -32    
128    -32    
-16    80     
128    -32    
-64    96     
32     16     
224    192    
-144   64     
0      -240   
-64    96     
80     112    
32     -48    
-48    272    
-144   -80    
-112   0      
48     80     
-16    32     
144    0      
-192   160    
-16    -176   
32     -208   
32     128    
-16    48     
0      0      
-80    32     
-16    96     
-64    48     
224    144    
112    192    
-256   -448   
-112   -432   
384    224    
32     320    
160    208    
48     272    
-48    224    
-80    -160   
16     0      
-272   -480   
-128   -640   
-64    160    
352    -176   
48     384    
64     -48    
144    272    
-80    -112   
144    -112   
-16    336    
80     -272   
128    -16    
-80    272    
80     -80    
-64    224    
48     96     
-128   272    
192    64     
-512   -352   
64     -80    
-80    112    
128    240    
208    0      
-64    -48    
64     80     
-64    96     
-64    320    
192    272    
-16    144    
16     0      
144    64     
-256   -224   
304    -480   
-160   -288   
336    160    
96     208    
64     288    
-240   256    
-96    192    
224    80     
-160   -16    
144    144    
-80    112    
0      96     
0      0      
128    96     
0      128    
0      16     
432    256    
-224   240    
-176   -128   
304    -208   
-224   224    
304    -16    
-16    80     
176    48     
320    48     
-352   32     
736    144    
-464   64     
512    128    
-368   0      
160    48     
0      -16    
112    -320   
-48    -48    
80     48     
272    48     
80     80     
80     64     
16     48     
48     -16    
160    -96    
-96    128    
384    -256   
-32    112    
-16    -112   
-224   -256   
96     160    
16     -240   
-176   32     
176    192    
-64    16     
96     80     
96     160    
16     160    
96     80     
112    160    
64     48     
48     0      
192    96     
-32    -32    
16     -112   
80     112    
-48    0      
176    64     
-176   -1136  
48     112    
-80    64     
-48    112    
48     64     
144    208    
-224   -224   
-32    64     
-16    32     
32     112    
-48    48     
192    192    
-64    80     
112    -432   
-112   32     
192    -1648  
-32    144    
48     192    
48     80     
-48    32     
64     -144   
-144   -160   
144    32     
-192   -112   
192    64     
-80    -32    
224    -96    
192    320    
-96    -176   
48     32     
16     -160   
176    96     
-32    -160   
144    80     
-272   -64    
560    48     
-48    48     
-32    128    
0      0      
48     16     
128    48     
144    -48    
112    256    
80     -144   
-176   32     
224    16     
32     144    
16     -1056  
160    16     
-80    -1504  
272    208    
-272   176    
0      32     
0      112    
-80    64     
80     64     
112    224    
160    128    
0      -144   
16     80     
256    -16    
-256   160    
-16    -608   
144    48     
16     0      
-80    16     
160    32     
32     96     
112    112    
64     -288   
-16    64     
80     -64    
176    80     
-64    -304   
-48    16     
224    -384   
16     80     
48     -448   
96     48     
-96    -96    
240    80     
32     96     
64     0      
112    -368   
-112   112    
208    160    
-288   -64    
160    96     
64     -80    
-288   -48    
400    -128   
224    176    
-240   -48    
112    -656   
-144   64     
256    -464   
-176   112    
-288   128    
-176   -400   
144    -96    
48     -928   
48     -144   
336    -400   
-144   80     
-32    80     
-32    -48    
208    32     
-80    -128   
48     -144   
-112   -80    
80     -288   
32     112    
16     -80    
-64    -192   
240    80     
-176   -128   
224    -32    
96     96     
32     64     
272    464    
-336   128    
-64    -224   
112    0      
96     64     
32     -64    
-96    -192   
96     -384   
-256   -416   
144    -80    
-352   64     
48     128    
-144   -96    
96     144    
-352   -816   
-192   -832   
256    -112   
32     -320   
-64    112    
224    176    
-304   64     
192    32     
-48    32     
-176   -80    
-48    -112   
-208   112    
304    112    
-96    16     
224    -352   
0      -160   
48     -624   
-80    -80    
112    352    
-32    112    
-144   -80    
-304   -496   
-144   -320   
240    64     
-176   -176   
112    -128   
-16    -16    
336    -64    
16     -80    
288    96     
-272   -112   
32     -32    
-48    112    
32     -944   
0      -32    
224    -16    
224    256    
-160   352    
112    176    
192    -176   
336    -256   
-96    -64    
176    -192   
-432   48     
112    160    
-208   -512   
112    -80    
-96    32     
-32    -592   
-16    192    
0      32     
112    160    
-80    -16    
64     352    
-256   -480   
80     64     
-400   0      
-16    -48    
-112   0      
-32    -32    
-304   32     
-32    -112   
80     32     
48     -448   
64     144    
32     -1456  
-16    -128   
-96    -112   
160    176    
-160   -32    
-32    -368   
-48    480    
160    96     
-80    -128   
96     -160   
-336   -80    
-16    -48    
48     208    
208    384    
192    96     
-144   160    
112    16     
-160   64     
64     0      
-96    -16    
336    208    
-176   112    
-16    -16    
80     240    
-48    144    
-96    -128   
-64    -80    
96     288    
-80    -144   
416    128    
-320   16     
-464   -128   
16     32     
160    48     
-112   32     
16     -32    
-32    16     
0      -176   
-80    48     
-80    -112   
432    192    
-944   16     
-80    -320   
32     -640   
-320   16     
112    176    
-240   80     
-80    -32    
-80    -176   
-144   16     
-240   -128   
-128   -272   
64     288    
-144   96     
-240   192    
224    256    
-208   -80    
144    48     
-320   -240   
-144   -64    
-144   -304   
-144   16     
-96    80     
-240   208    
-16    144    
-1552  -208   
80     112    
64     112    
-16    80     
112    16     
-80    32     
64     384    
144    192    
-176   -128   
64     -464   
-48    704    
0      336    
-336   -560   
128    -80    
-160   64     
-288   32     
-64    112    
-592   64     
-192   112    
-48    -176   
-32    48     
0      32     
64     176    
-80    96     
-32    160    
-112   96     
-32    -240   
-64    -64    
400    288    
-240   304    
64     96     
-80    0      
-656   -192   
-48    384    
96     0      
-64    176    
144    208    
-256   432    
304    192    
32     400    
-176   16     
-32    32     
-80    -16    
-48    -16    
-64    16     
-224   -96    
208    64     
-128   32     
272    288    
-1344  -208   
96     0      
176    48     
-128   64     
-80    0      
-176   -64    
144    80     
-32    176    
-192   -160   
128    -352   
-240   304    
192    128    
-240   -64    
-96    -144   
320    112    
-1472  -160   
224    16     
-48    -64    
272    128    
528    704    
-288   560    
-128   128    
-64    64     
0      64     
0      32     
208    32     
0      32     
144    96     
-128   0      
176    192    
-624   -32    
-48    80     
96     128    
-64    -16    
128    176    
-304   -128   
32     -32    
-160   -32    
368    128    
-176   272    
208    272    
-240   -112   
96     48     
32     -16    
-128   96     
-496   -64    
-128   -48    
272    144    
304    176    
-720   -144   
-32    112    
-112   112    
-176   64     
128    128    
16     -32    
0      0      
-272   -80    
112    -16    
-224   -48    
80     160    
32     208    
-96    -112   
-80    -96    
288    -16    
-16    -80    
384    -176   
80     -128   
224    -80    
0      -48    
128    160    
16     -64    
-112   64     
48     64     
-160   -64    
-32    -48    
-128   80     
-144   -48    
-48    -64    
48     32     
176    16     
32     112    
96     144    
-32    64     
32     112    
-32    -80    
80     160    
192    192    
48     176    
-64    -80    
-160   64     
208    80     
-336   96     
112    64     
-64    64     
0      32     
112    -80    
-160   80     
48     -176   
-96    -96    
-48    112    
272    64     
-96    32     
-16    64     
-176   -80    
-48    16     
80     32     
0      160    
208    96     
0      -32    
-64    176    
128    48     
-176   96     
96     16     
48     48     
112    64     
-16    96     
-80    -16    
96     160    
-160   -48    
32     112    
160    176    
-16    96     
-128   -16    
96     -240   
352    96     
-352   0      
176    96     
-16    0      
-64    16     
32     176    
160    112    
-80    32     
48     80     
144    128    
48     192    
208    304    
-96    128    
96     16     
-160   -224   
224    128    
160    0      
-32    48     
64     16     
48     160    
160    240    
-144   160    
-32    32     
32     -32    
64     272    
192    64     
16     0      
128    80     
-48    48     
48     96     
144    64     
80     32     
-128   32     
-32    32     
160    96     
32     96     
0      128    
16     16     
16     -32    
-80    64     
144    -496   
176    128    
-144   32     
144    32     
-48    224    
272    144    
-192   64     
96     32     
32     16     
-96    32     
144    -160   
416    320    
-432   160    
-16    -176   
128    80     
-48    80     
144    -256   
64     -1792  
-80    -16    
400    128    
-112   -144   
-112   -496   
304    320    
-288   160    
112    48     
-64    -32    
-32    80     
0      16     
-32    -144   
144    144    
-32    -160   
-16    144    
16     -464   
-64    -32    
48     160    
80     336    
112    80     
-48    48     
32     144    
208    272    
-176   208    
272    336    
112    336    
-32    336    
208    480    
-16    832    
64     592    
32     -48    
32     112    
0      -560   
128    160    
-160   -144   
256    208    
64     112    
-128   -144   
16     -96    
-64    -48    
96     112    
0      -320   
64     128    
0      -304   
176    192    
0      -208   
176    624    
-48    96     
80     -352   
-80    -80    
96     256    
-16    16     
48     -16    
256    368    
16     -144   
-112   128    
64     -704   
112    -208   
144    144    
16     64     
48     -16    
48     208    
-144   -720   
688    224    
-480   -96    
400    -304   
-16    448    
224    336    
16     0      
224    -128   
-112   16     
-128   -176   
0      -16    
128    448    
-80    -144   
-112   -192   
-176   -48    
48     -320   
384    592    
-384   16     
160    -816   
288    656    
-512   -208   
-16    -2400  
-64    -176   
288    -160   
80     320    
-176   432    
128    -736   
128    96     
-128   0      
64     -16    
96     -112   
0      -784   
80     -96    
-192   -592   
288    48     
-832   -16    
144    -80    
96     0      
112    160    
-80    -80    
80     -1328  
112    -544   
-160   -48    
304    128    
48     -400   
0      208    
224    -320   
-16    240    
64     -112   
32     -432   
112    336    
128    32     
160    352    
80     160    
-96    -272   
48     -352   
16     -48    
256    -912   
-160   -96    
48     -176   
-48    -208   
112    -128   
16     80     
336    208    
-416   -400   
0      -464   
112    -96    
-32    -208   
-96    -112   
128    -112   
160    16     
-112   -48    
112    -352   
16     -192   
128    -192   
-96    112    
80     0      
32     32     
-80    32     
-176   -64    
208    -160   
48     -176   
-352   336    
96     32     
-304   -320   
384    -448   
0      640    
96     48     
-64    -608   
144    -80    
160    288    
0      -16    
64     368    
160    48     
-288   -624   
176    192    
64     192    
96     16     
-64    240    
32     0      
-128   -80    
-144   -128   
208    96     
-80    80     
240    -912   
112    80     
96     32     
160    -64    
-48    128    
48     -96    
-96    -608   
368    -96    
-144   176    
32     -64    
-240   -336   
-16    -480   
112    -192   
96     192    
-64    -80    
-32    -880   
16     64     
240    -160   
-128   144    
-320   -80    
288    256    
-64    192    
80     32     
-256   -64    
112    80     
160    -16    
-144   -240   
240    -224   
-48    -368   
256    48     
-32    -320   
240    80     
-16    112    
288    128    
-16    64     
144    0      
-144   -32    
32     -32    
-48    16     
-80    -16    
208    144    
-32    -192   
176    32     
112    -192   
192    160    
-16    -96    
96     112    
-96    32     
64     -96    
-496   -176   
304    32     
-272   16     
32     48     
-64    16     
16     -16    
-304   -96    
128    -192   
96     224    
-64    -208   
224    -96    
-1104  0      
-208   48     
-208   80     
-688   80     
-48    16     
48     32     
0      0      
240    -144   
-256   80     
192    288    
64     400    
-1568  128    
208    32     
-192   -32    
-112   -112   
-352   -160   
144    224    
-80    -64    
-128   -80    
224    64     
336    208    
-48    208    
-1360  -96    
80     -48    
80     -80    
32     80     
-240   -96    
80     176    
112    -352   
64     -144   
-80    -64    
0      48     
80     96     
32     96     
-48    112    
176    192    
-16    224    
-480   16     
112    144    
32     48     
192    -80    
-160   -16    
-64    128    
-144   -32    
128    368    
-112   112    
-64    48     
96     -32    
32     -16    
-176   144    
-32    128    
176    -48    
-64    -112   
0      -64    
-352   -112   
-48    80     
0      16     
48     112    
-128   -16    
-112   112    
32     48     
-160   -32    
0      16     
-48    -16    
0      128    
-224   -32    
-160   192    
32     16     
-32    208    
-368   -160   
0      96     
16     -96    
-16    48     
0      16     
176    192    
-320   112    
-16    48     
-80    -128   
-176   32     
224    288    
-320   80     
-192   0      
96     -32    
-112   64     
-208   -272   
-208   80     
-352   96     
-192   96     
160    80     
-16    -48    
-48    112    
144    32     
-80    32     
64     80     
0      192    
0      16     
-64    112    
208    272    
-304   176    
-80    16     
144    112    
-704   0      
-80    80     
32     64     
-96    32     
-48    -64    
160    32     
-32    64     
-16    304    
-96    144    
-96    -96    
160    240    
96     160    
-336   128    
48     48     
-128   144    
-288   80     
-336   160    
32     48     
64     0      
48     96     
-160   -176   
-48    -48    
160    16     
-192   16     
-160   0      
192    224    
-320   -48    
80     64     
-240   -224   
96     112    
-208   -80    
-48    -64    
112    -16    
144    368    
-80    320    
0      240    
80     96     
-80    0      
112    -192   
544    368    
-336   672    
-208   112    
160    464    
80     176    
-48    368    
16     80     
-96    96     
208    256    
-224   112    
128    320    
32     32     
112    -16    
-16    112    
-48    192    
-48    -80    
96     128    
48     224    
-112   -224   
-64    -288   
64     96     
32     224    
144    144    
-112   80     
-96    -16    
96     -352   
-80    176    
112    192    
256    400    
-368   -400   
64     32     
-208   144    
-16    -672   
224    480    
64     336    
96     160    
112    1232   
-160   -368   
48     32     
112    0      
96     80     
48     0      
352    544    
-384   -64    
176    -224   
-128   288    
112    448    
0      -560   
16     112    
-80    0      
-128   16     
96     80     
160    -96    
48     576    
64     -240   
-64    192    
-144   208    
-176   -112   
-16    576    
-16    -208   
-80    0      
160    96     
-112   -64    
144    224    
192    208    
-272   80     
256    16     
48     128    
336    304    
-16    112    
224    96     
-128   32     
64     528    
96     -368   
80     -576   
80     -80    
64     192    
-416   -656   
-96    -400   
176    480    
96     704    
-80    48     
-96    -192   
224    -64    
-80    0      
-32    128    
32     48     
0      160    
320    400    
-240   256    
-176   48     
96     64     
-320   -112   
304    704    
112    368    
-272   -16    
-176   -640   
176    160    
-144   544    
112    -208   
0      144    
-144   -240   
176    16     
-48    0      
80     256    
-240   -624   
432    -304   
-128   688    
-96    -128   
96     -96    
48     -944   
-48    16     
-64    -160   
64     32     
48     272    
-80    -192   
-144   400    
16     -128   
80     -48    
-64    64     
64     -16    
112    256    
-96    80     
32     -16    
48     144    
0      -224   
-112   48     
48     -464   
16     96     
96     128    
-240   -32    
224    -208   
144    320    
-64    -464   
48     320    
192    1296   
-80    608    
-176   -944   
512    464    
-496   128    
240    -752   
-80    656    
-144   -1216  
240    752    
-64    -320   
32     -592   
160    464    
80     48     
-128   320    
176    0      
112    -96    
-64    64     
416    224    
-256   -144   
-32    -192   
-64    112    
176    -304   
16     224    
64     64     
160    -416   
208    384    
-304   -416   
128    128    
-144   32     
160    80     
-16    64     
160    0      
16     96     
48     -192   
64     48     
64     -384   
160    672    
48     -224   
-256   -96    
-64    -384   
0      32     
96     480    
-80    -176   
128    -288   
16     -176   
-16    -256   
80     -240   
272    368    
-256   -480   
224    -336   
-16    -64    
160    208    
48     -112   
16     32     
64     -720   
16     64     
-144   -64    
208    112    
0      -16    
0      -128   
64     80     
64     -176   
64     -16    
-16    -64    
64     -32    
-16    -176   
48     64     
-32    -208   
32     224    
112    -80    
-32    304    
304    96     
-112   -512   
64     0      
-320   192    
32     -208   
-80    -32    
160    -144   
-128   -64    
0      288    
48     -32    
48     16     
-128   -48    
272    144    
-128   48     
160    -368   
80     112    
432    320    
-576   160    
-160   0      
-32    -544   
144    -96    
176    -160   
-32    -80    
432    -1408  
-96    -64    
64     160    
-16    80     
64     288    
-32    -32    
112    -96    
-64    32     
64     -80    
64     -16    
-304   0      
128    -128   
16     -16    
160    -128   
-144   -32    
64     -416   
144    64     
-224   -2160  
304    48     
-240   48     
32     160    
32     -176   
-144   128    
400    112    
-32    224    
-256   128    
112    96     
-1648  80     
-32    192    
-80    -48    
176    48     
-64    -32    
64     -496   
64     80     
240    0      
208    224    
608    416    
-368   352    
64     -240   
-64    -352   
-48    -288   
-112   -160   
-288   -400   
-48    -144   
-144   112    
-48    64     
-240   32     
96     -176   
-432   -48    
-96    -1104  
-32    144    
64     64     
32     -64    
-176   -224   
224    -416   
-16    128    
176    400    
0      304    
-112   160    
-2000  -176   
80     -112   
-112   -144   
272    -32    
-224   32     
32     -624   
96     -64    
512    -64    
-224   -176   
-32    -64    
-112   32     
80     32     
112    48     
-224   80     
192    48     
-720   -80    
16     -48    
-400   -160   
128    0      
144    80     
-128   -368   
160    64     
32     -176   
-160   208    
128    96     
-176   96     
-464   0      
-64    -48    
32     48     
-80    -32    
-64    48     
112    -16    
-448   -112   
112    -320   
64     192    
-304   -400   
336    112    
-32    80     
96     -48    
-304   64     
160    -112   
-80    32     
-80    -80    
-96    -128   
96     -32    
32     -16    
-32    -272   
48     -160   
128    -192   
112    80     
64     -96    
144    112    
80     96     
-160   48     
-16    64     
-16    -32    
-64    -16    
112    48     
0      64     
176    16     
-624   -96    
-16    -128   
96     96     
-864   -176   
64     -16    
-416   16     
-528   -32    
-176   -64    
-768   -32    
80     -16    
-320   0      
176    240    
304    32     
-384   16     
224    -96    
-176   0      
0      -80    
48     80     
16     -64    
-128   -304   
176    -16    
-336   -32    
32     -80    
-224   -208   
-112   -304   
-112   -240   
-192   -16    
-288   336    
-48    144    
128    176    
0      0      
-80    -176   
32     -128   
-112   0      
-16    112    
96     -256   
128    368    
-160   16     
0      16     
16     160    
-208   160    
-96    -128   
-608   -112   
16     288    
-144   48     
-16    64     
-128   16     
64     -720   
0      240    
-272   -464   
208    -640   
144    192    
-16    -256   
208    288    
-176   288    
-128   -288   
-32    -80    
128    208    
-128   -80    
224    0      
-32    160    
-80    -128   
112    112    
-160   -64    
-16    32     
-80    -176   
-144   -384   
-64    144    
-112   -16    
-64    32     
32     80     
-64    64     
-144   48     
16     48     
-512   -432   
144    -384   
-16    -64    
16     144    
96     224    
-96    192    
80     64     
112    96     
-112   256    
128    -48    
-320   -48    
400    -32    
-128   64     
-32    -48    
-48    96     
-176   96     
624    528    
-720   352    
-16    176    
-48    -80    
32     352    
416    528    
48     432    
-32    128    
112    0      
16     112    
-112   -48    
-64    128    
-176   -176   
-272   -48    
48     -80    
32     176    
-464   16     
128    160    
272    208    
-160   32     
80     16     
160    160    
-16    48     
240    -32    
-32    368    
-336   -80    
-176   -224   
-112   -240   
48     -128   
-464   80     
304    240    
-672   -64    
-272   128    
-160   -384   
128    -192   
-80    400    
80     128    
208    192    
-256   64     
48     80     
-272   -192   
496    48     
-192   32     
128    48     
16     -16    
64     208    
48     384    
208    -112   
256    176    
48     -64    
16     112    
-112   48     
-240   -320   
144    -96    
192    288    
304    816    
-320   -48    
208    -192   
160    272    
-112   -112   
-16    -80    
64     -176   
144    16     
-48    -32    
-144   224    
208    -1200  
112    848    
-16    384    
-48    -320   
128    -48    
-112   240    
48     144    
-176   -64    
0      -144   
256    400    
-32    240    
32     496    
32     -224   
0      64     
80     720    
-112   128    
128    -496   
160    -48    
16     464    
176    336    
-128   128    
80     80     
0      0      
64     224    
-80    -80    
-272   -48    
208    48     
-176   352    
16     16     
16     -416   
288    656    
-64    384    
-16    48     
16     -96    
-48    -240   
-192   -96    
192    576    
-80    272    
48     304    
-96    48     
-96    -32    
32     -384   
-64    80     
288    128    
-192   32     
0      80     
128    64     
-112   128    
80     -240   
-64    32     
144    0      
-48    64     
48     0      
-48    16     
48     256    
208    208    
-48    112    
96     464    
32     128    
-48    96     
80     0      
320    224    
-144   176    
-32    32     
96     -80    
-64    0      
208    160    
-112   -96    
48     32     
224    96     
32     -64    
64     48     
-32    0      
224    32     
-64    80     
192    0      
48     -16    
48     32     
0      64     
272    176    
-336   -96    
128    32     
64     96     
80     -208   
0      144    
-32    -432   
224    192    
112    96     
-160   0      
144    -144   
224    272    
-128   16     
-32    0      
-48    -256   
176    96     
48     144    
-112   -112   
288    -128   
0      -224   
64     80     
-32    -32    
176    96     
16     -256   
96     112    
64     80     
-32    80     
0      -160   
112    -32    
-80    128    
-32    112    
208    -32    
96     32     
48     96     
16     -64    
-64    0      
144    -176   
128    0      
16     16     
16     288    
80     256    
-32    176    
-64    32     
0      144    
-96    -128   
192    0      
64     80     
16     -80    
-80    64     
112    -96    
80     32     
176    -16    
-32    -16    
-16    -640   
80     112    
-192   -1760  
144    192    
-16    208    
32     352    
-16    -48    
-64    80     
80     16     
-128   -64    
112    112    
-48    -32    
320    272    
-288   -128   
-48    128    
-128   -1088  
64     -32    
-16    -432   
160    96     
-80    80     
64     160    
-32    128    
128    64     
32     0      
-128   48     
64     16     
-80    -768   
160    -240   
-32    -208   
160    160    
16     -32    
128    -48    
-32    -208   
240    160    
-64    208    
48     16     
-48    80     
208    176    
-80    32     
-64    -416   
240    128    
-96    -256   
176    80     
-160   -112   
256    -16    
16     -128   
112    64     
128    -336   
-32    144    
192    32     
48     112    
-48    16     
208    -160   
32     -512   
224    -208   
80     48     
-112   -80    
304    64     
-32    -80    
112    32     
-64    -208   
48     64     
192    96     
80     16     
-48    64     
32     -384   
-208   -128   
-560   -80    
16     -112   
112    0      
16     -368   
32     48     
80     304    
64     -112   
32     112    
128    -80    
32     0      
16     48     
176    16     
-48    64     
-16    -208   
160    112    
-976   -48    
96     -144   
-48    -96    
208    80     
224    -16    
64     -976   
48     -128   
80     112    
16     -128   
128    -48    
80     -80    
-64    -272   
64     64     
64     -240   
64     -16    
-16    192    
-176   -80    
16     -304   
192    -32    
208    -48    
64     -352   
48     48     
128    -1296  
224    -32    
-80    -112   
-16    128    
80     -112   
32     96     
-64    16     
48     0      
0      112    
32     32     
-544   1056   
192    -48    
-432   -1056  
368    864    
-32    48     
176    -784   
-32    304    
-32    -128   
0      64     
112    0      
64     112    
-32    -16    
-16    -48    
-96    -80    
80     -304   
-288   0      
-48    -112   
0      176    
48     -496   
80     -192   
64     -1472  
128    512    
48     -1776  
96     64     
144    128    
0      -144   
-176   -16    
64     -128   
-64    144    
96     48     
-176   -64    
272    144    
-2480  -736   
288    -432   
-144   -272   
96     -368   
208    112    
-64    -400   
144    144    
-32    -144   
176    -240   
-112   -208   
208    464    
16     176    
64     96     
-272   -80    
16     -80    
-192   64     
-144   -208   
240    128    
224    176    
144    240    
-32    48     
304    144    
0      -176   
96     -64    
-464   -112   
112    48     
-384   -16    
96     -32    
-272   -304   
176    0      
-368   32     
176    -64    
-64    48     
128    -224   
32     128    
144    -64    
48     64     
-336   -256   
112    32     
-64    32     
160    176    
-96    96     
-32    -80    
-192   -32    
192    64     
-128   144    
240    -208   
-96    -288   
-368   -528   
208    -128   
-576   -96    
144    112    
192    320    
-1200  48     
64     176    
-272   176    
128    0      
32     0      
16     -32    
-160   128    
-64    176    
-592   -144   
80     352    
-368   -48    
-64    16     
-448   -176   
-160   -240   
-480   -352   
-992   -544   
0      96     
-1600  240    
-80    16     
96     0      
-208   -16    
-32    -160   
-160   112    
368    272    
-560   224    
80     -304   
144    96     
256    0      
-48    48     
32     16     
-48    48     
-16    288    
-32    -64    
-352   -432   
-368   -656   
-320   464    
-352   -416   
16     16     
16     240    
176    32     
-128   -96    
160    64     
384    704    
-224   400    
352    80     
-176   160    
592    720    
-448   176    
96     -32    
80     -16    
-112   304    
0      224    
448    208    
-464   -224   
-32    -64    
-400   -704   
-304   -288   
112    -192   
112    96     
-96    -32    
-192   16     
304    96     
80     -64    
-32    -48    
-48    0      
304    512    
-336   336    
160    192    
-80    -176   
208    -16    
-160   0      
208    144    
-224   64     
128    96     
-80    16     
-16    -32    
-240   -256   
0      -32    
96     32     
-160   160    
32     128    
-176   -112   
80     -80    
-160   -304   
-80    0      
192    240    
-80    144    
32     16     
-16    -48    
80     -32    
-64    16     
64     240    
272    80     
-80    32     
-144   128    
96     32     
-624   -144   
80     112    
-784   96     
0      144    
48     96     
-224   0      
32     64     
112    48     
128    176    
16     16     
-128   32     
32     64     
-144   48     
-176   -32    
32     32     
-352   -32    
224    112    
-1152  -48    
96     64     
-128   208    
240    -16    
-80    0      
32     80     
0      64     
-128   32     
288    336    
-368   0      
112    64     
384    144    
-416   128    
240    -48    
-224   144    
-16    -16    
-160   64     
112    80     
48     112    
128    144    
-160   -32    
0      32     
16     48     
-32    32     
48     48     
112    -16    
0      -16    
0      32     
-176   -80    
32     144    
0      96     
64     240    
-208   48     
64     64     
48     16     
-64    -16    
32     64     
-64    -48    
-16    -112   
48     144    
208    80     
-304   -16    
144    128    
-208   -64    
16     48     
96     64     
80     176    
112    144    
-48    -48    
160    -96    
16     144    
64     160    
256    192    
-128   96     
112    0      
-48    128    
0      64     
96     96     
32     112    
-80    144    
464    400    
-368   336    
144    208    
-144   -32    
80     128    
80     16     
0      192    
144    128    
-144   0      
-48    -64    
64     16     
128    112    
-32    112    
-64    112    
64     -48    
128    160    
-96    96     
-32    -32    
0      0      
144    0      
-64    32     
48     -32    
-80    16     
64     160    
-272   -96    
112    160    
-32    96     
32     64     
96     144    
48     96     
64     16     
32     192    
96     128    
32     128    
96     96     
-64    80     
336    384    
-336   384    
-80    -16    
0      -80    
160    112    
-176   -208   
144    144    
-16    80     
16     16     
-16    80     
80     48     
-16    96     
64     224    
-208   0      
48     32     
144    64     
-128   48     
176    144    
-48    0      
-16    -112   
144    -144   
-32    -176   
176    96     
16     192    
160    368    
-224   64     
48     48     
0      160    
80     112    
-64    64     
112    96     
-144   -16    
160    144    
-128   -16    
48     0      
224    160    
-32    -80    
64     64     
32     -992   
-32    112    
128    48     
48     112    
224    80     
-48    80     
352    96     
-352   176    
0      32     
-160   48     
144    -96    
96     128    
-144   -112   
80     -192   
144    -16    
-48    -288   
96     96     
96     80     
32     304    
-208   -112   
160    192    
160    -592   
224    272    
16     0      
0      80     
192    176    
-32    -80    
0      96     
64     -272   
0      32     
192    -128   
-80    -16    
-80    -736   
-112   32     
-128   320    
80     0      
128    -112   
16     96     
-16    32     
80     32     
48     -48    
-16    -304   
96     48     
32     -272   
64     -64    
-128   -224   
112    0      
-160   -1648  
64     352    
-80    368    
-160   -192   
-32    16     
-128   112    
16     16     
48     112    
272    -144   
-48    336    
176    -160   
0      192    
96     64     
16     -368   
144    -32    
-16    -128   
-96    -16    
272    -256   
-112   240    
272    672    
-16    272    
-128   -144   
-48    -80    
384    192    
-240   -416   
128    80     
32     -304   
0      64     
48     -208   
96     112    
32     -112   
48     96     
32     -208   
64     80     
-176   -48    
336    160    
-144   176    
-16    0      
-96    272    
112    -48    
96     144    
-16    -80    
0      208    
-128   -240   
224    -256   
160    160    
32     208    
256    -800   
-48    208    
224    64     
64     -368   
144    -32    
80     -80    
64     128    
0      -112   
128    -400   
0      32     
32     240    
16     -16    
-96    16     
144    -96    
96     128    
-32    -16    
96     -272   
240    240    
-112   -240   
96     -352   
-240   160    
400    16     
-192   96     
272    -48    
144    128    
-112   -2096  
208    -16    
-16    96     
128    -112   
96     -288   
320    256    
-272   144    
80     16     
64     -352   
0      -64    
-896   -176   
-48    144    
208    0      
-64    32     
208    128    
144    240    
-192   16     
272    -448   
128    -32    
192    -48    
-48    -48    
176    -64    
48     176    
-48    0      
-96    0      
144    112    
-400   -608   
32     -320   
224    48     
-96    144    
-112   -544   
0      -640   
80     -480   
384    464    
-16    -304   
352    -224   
0      320    
400    176    
-96    160    
224    -112   
-400   0      
48     48     
-1440  -176   
-32    400    
256    -144   
-224   -208   
-80    -256   
288    -960   
32     656    
160    -320   
-48    -48    
144    224    
144    144    
-176   -240   
32     -496   
-32    -208   
160    48     
-192   144    
32     16     
-640   240    
64     -48    
-272   -160   
64     -144   
112    80     
-96    -1120  
160    -304   
-16    -48    
224    -128   
16     0      
176    -192   
-256   -48    
128    96     
-192   0      
-16    -32    
-64    80     
-96    -112   
336    288    
-208   -96    
32     64     
64     -464   
-112   144    
16     -112   
208    -256   
-272   -48    
112    -32    
-192   -128   
112    80     
-240   80     
-80    -224   
-384   -64    
0      -112   
128    80     
-64    -48    
-80    32     
80     -784   
-208   -240   
-96    -144   
224    80     
-176   16     
-48    64     
-80    -128   
256    64     
-160   32     
80     -32    
-176   -32    
176    16     
-32    64     
144    -144   
-112   0      
112    -448   
96     -16    
-80    112    
256    -16    
-48    64     
-16    -16    
144    -112   
-144   -112   
-16    48     
64     80     
-80    32     
-64    -32    
-64    -80    
-96    -400   
32     96     
-560   -160   
-624   -16    
-80    0      
-80    64     
-224   -16    
48     -32    
-112   -80    
32     -80    
96     96     
112    -48    
-496   16     
-624   -128   
16     80     
-640   -80    
80     112    
0      32     
-192   16     
-16    16     
176    16     
-288   -128   
-464   48     
128    48     
-496   16     
96     -16    
-112   -96    
32     96     
-112   -160   
-48    80     
96     64     
160    -64    
-352   -32    
16     16     
-320   48     
64     32     
-96    96     
-336   -160   
112    -48    
-1088  16     
112    160    
-128   -112   
0      80     
-16    -48    
96     240    
112    -32    
-320   -192   
16     32     
-16    -144   
-240   80     
0      32     
-80    48     
-336   -176   
32     -32    
-240   -144   
-16    96     
16     -112   
16     80     
-80    -112   
192    160    
-112   -160   
-112   -48    
48     -48    
32     64     
-48    32     
64     80     
-112   160    
-80    160    
-32    112    
-240   0      
96     544    
-544   16     
-272   -384   
176    -112   
-16    32     
-208   16     
144    96     
-48    16     
-112   48     
96     144    
-144   112    
64     96     
-256   32     
336    192    
-432   96     
192    32     
-496   -192   
224    -64    
32     -64    
-96    96     
128    16     
-240   16     
64     -160   
160    112    
-64    32     
64     0      
-80    -64    
192    112    
-16    160    
-320   -16    
32     96     
-720   -448   
320    16     
-800   192    
-144   32     
16     16     
-112   32     
128    96     
-160   48     
32     48     
48     48     
112    96     
-304   -160   
224    -16    
-240   -16    
176    80     
-256   16     
32     -16    
-224   -112   
-64    80     
48     80     
16     -16    
112    96     
16     48     
0      112    
48     112    
-16    32     
0      96     
-160   112    
-48    48     
-64    144    
-64    32     
-256   160    
336    288    
-112   80     
144    128    
-112   32     
-176   16     
128    -80    
0      -96    
16     -32    
-112   80     
16     16     
-240   -64    
688    624    
-352   544    
-448   -208   
-64    -128   
240    96     
-144   160    
-48    64     
272    256    
-208   192    
-112   -16    
-96    -32    
208    80     
112    192    
-368   32     
112    48     
-144   -80    
208    256    
-496   -352   
336    -352   
272    -128   
272    80     
48     80     
16     48     
48     -16    
-48    48     
16     0      
128    0      
64     -96    
-112   -144   
272    16     
64     288    
-80    224    
-16    -32    
112    112    
176    48     
-176   -16    
-32    96     
160    0      
-144   32     
96     144    
-16    80     
32     -288   
192    256    
-352   -48    
16     -272   
528    560    
-256   432    
-96    -336   
144    16     
48     80     
160    144    
-112   32     
144    64     
48     144    
-160   -224   
-16    -464   
96     112    
0      464    
-80    -192   
160    -16    
128    400    
-96    272    
80     48     
160    640    
96     304    
-208   -288   
272    368    
16     80     
-112   64     
112    32     
0      48     
32     112    
16     336    
160    96     
-16    144    
64     0      
-32    -368   
32     384    
112    400    
80     96     
-48    64     
32     96     
-16    16     
-32    64     
-128   -16    
48     96     
160    48     
-32    112    
-16    -80    
48     96     
-96    0      
48     -160   
-240   -144   
320    -2032  
-32    -48    
96     64     
-80    256    
192    112    
-288   -16    
208    -16    
32     16     
0      64     
272    240    
-192   288    
80     176    
48     112    
448    256    
-144   416    
16     -1216  
80     -64    
16     64     
-16    64     
80     48     
-16    112    
80     112    
16     160    
32     80     
-144   -64    
48     -80    
-336   -64    
176    80     
-80    -144   
160    80     
-48    -304   
112    416    
112    576    
-480   -656   
176    -416   
64     -112   
64     -336   
48     112    
128    144    
-48    160    
48     48     
32     0      
400    320    
-288   96     
32     80     
112    -160   
80     64     
96     -560   
0      112    
176    -240   
-96    48     
112    288    
128    784    
-16    544    
-480   -1536  
176    -224   
208    640    
-208   112    
272    48     
-16    240    
80     -64    
224    816    
144    144    
-80    -304   
-48    -688   
-48    48     
112    -96    
64     144    
48     80     
112    208    
0      0      
64     -80    
144    688    
-96    -272   
224    -16    
144    -16    
160    384    
80     80     
48     176    
80     -288   
-16    -224   
-16    -160   
32     -80    
-256   -368   
352    -432   
-112   128    
272    160    
-128   192    
64     -112   
128    128    
0      -208   
-96    -208   
-192   -256   
496    -48    
-320   192    
416    160    
-96    112    
288    240    
-320   112    
160    112    
-32    0      
-176   -272   
640    80     
-336   -32    
560    64     
-144   32     
272    128    
16     32     
144    80     
-32    -48    
496    -976   
-480   16     
384    -352   
-48    -480   
224    -96    
-64    -544   
48     -208   
160    -64    
0      -96    
-48    64     
336    -160   
-32    208    
48     -320   
-112   -1008  
224    16     
-80    -288   
112    48     
144    -32    
224    -16    
-1264  144    
-48    -48    
160    32     
64     -208   
192    176    
144    -448   
96     -112   
128    80     
-112   -208   
160    -464   
-64    144    
208    48     
-16    96     
-112   48     
-128   32     
-448   64     
160    32     
96     48     
48     -272   
64     -16    
176    -1088  
-160   0      
96     -480   
16     -48    
64     64     
-32    32     
64     -112   
-16    32     
-32    0      
240    -48    
-224   16     
160    80     
-144   -80    
96     -256   
96     32     
0      -496   
-112   -48    
256    -672   
-112   -80    
64     -192   
256    208    
-112   -176   
-80    32     
-64    48     
16     -32    
-224   32     
144    -96    
-1680  -48    
224    -112   
-48    -128   
272    128    
-32    96     
304    -80    
-272   32     
144    -1072  
-48    64     
64     -80    
16     0      
-48    64     
-32    -112   
16     -16    
176    -112   
-656   -112   
-48    0      
144    32     
-160   -16    
-48    -64    
144    -352   
-304   288    
192    -1264  
144    64     
-112   0      
112    -32    
0      -48    
80     -224   
-96    -16    
-48    32     
-320   32     
-48    32     
-608   0      
-128   -240   
240    64     
-240   -304   
240    272    
-48    -576   
-16    144    
16     -16    
0      0      
48     336    
-160   240    
-208   16     
176    96     
-48    0      
112    128    
-32    -80    
144    -128   
96     48     
112    -80    
80     48     
64     -144   
128    -64    
-160   -256   
208    -448   
32     80     
256    16     
-208   16     
240    16     
64     -64    
0      32     
32     16     
-128   -16    
160    96     
-64    -32    
272    96     
-32    -192   
64     -96    
-128   0      
80     -80    
80     64     
16     -48    
-400   0      
448    -80    
-160   64     
160    -32    
-32    64     
-32    -128   
208    32     
-624   -272   
48     160    
64     32     
-256   240    
-176   176    
-96    128    
-64    -16    
-752   16     
-96    -16    
144    48     
-80    96     
-512   16     
160    192    
-592   -160   
-16    112    
-16    -144   
160    272    
-48    -96    
-208   224    
-176   192    
-272   -304   
-80    -80    
-448   -128   
80     80     
256    336    
16     256    
0      -64    
-32    112    
-112   -160   
16     16     
32     -176   
-64    -96    
-32    -16    
-16    16     
-112   80     
144    -112   
144    -560   
-96    -80    
-64    144    
-800   -16    
-80    -144   
-80    -80    
-16    16     
-176   -496   
-160   -160   
80     -64    
80     -256   
80     -48    
64     -80    
96     272    
-160   16     
320    304    
144    736    
-192   112    
-48    112    
-64    -96    
96     -16    
128    96     
-16    -80    
112    -48    
-128   144    
80     -160   
-352   -128   
0      -176   
32     80     
144    -80    
-16    -16    
160    208    
-64    320    
-464   -464   
0      16     
-160   992    
-448   -192   
64     -544   
176    448    
-112   96     
192    -208   
0      272    
-16    0      
-96    -32    
-112   48     
128    32     
-112   320    
-16    -144   
-160   -208   
144    192    
-480   -304   
144    176    
16     48     
-48    80     
-112   -64    
368    64     
-304   16     
-64    0      
160    80     
-48    48     
-80    32     
96     64     
-80    0      
-112   -96    
96     112    
-160   -80    
224    400    
-576   688    
-48    -32    
-128   -432   
96     -192   
-64    32     
16     32     
96     96     
208    576    
400    672    
-224   288    
32     64     
-416   -432   
160    48     
-80    400    
48     240    
-112   -80    
-176   -208   
96     -304   
-128   -144   
-80    -176   
160    -112   
-80    192    
112    96     
0      -16    
-64    -96    
-176   96     
144    16     
-96    128    
-16    -16    
16     64     
32     80     
32     96     
16     48     
16     80     
16     48     
48     128    
-240   80     
368    64     
-144   144    
32     224    
-64    -288   
96     -240   
112    288    
-64    96     
0      64     
64     208    
-112   -160   
256    0      
-112   16     
-96    -48    
288    160    
-224   64     
160    -16    
-128   160    
-16    0      
80     48     
-48    -48    
192    96     
-64    144    
160    336    
208    576    
80     448    
-144   272    
-112   -288   
112    -208   
-128   48     
112    32     
32     224    
32     848    
256    1008   
-192   304    
-400   -704   
208    304    
0      64     
-96    -32    
208    -64    
-32    32     
64     256    
0      -96    
336    336    
-160   -432   
-16    480    
32     0      
144    80     
0      16     
112    208    
112    176    
-48    -112   
48     -16    
112    208    
0      160    
-80    -240   
-96    -480   
176    -80    
16     16     
-32    32     
-96    224    
-48    -16    
-80    0      
-176   32     
-16    64     
-144   -128   
0      -640   
96     176    
-32    -16    
80     16     
96     144    
112    128    
0      112    
-16    -208   
-96    176    
-16    -80    
-128   -176   
160    96     
96     64     
-16    112    
-96    32     
112    -320   
-64    192    
-16    32     
112    -112   
192    288    
0      48     
-16    0      
64     0      
48     128    
80     160    
-32    112    
32     48     
-32    64     
-192   240    
288    112    
-48    48     
256    80     
-128   -304   
144    208    
144    160    
64     16     
16     112    
240    160    
-16    176    
144    144    
64     -144   
48     64     
64     16     
64     176    
64     160    
-80    96     
64     112    
144    -1248  
-192   -48    
32     80     
-96    128    
-48    64     
176    176    
208    224    
-112   224    
112    256    
-96    0      
0      -368   
368    -176   
336    -240   
-208   -256   
48     112    
0      -640   
-64    16     
48     -2272  
112    176    
160    -128   
-16    112    
272    256    
-240   144    
80     112    
-176   16     
48     -112   
-112   16     
96     160    
64     240    
0      128    
-16    96     
0      80     
144    -48    
80     80     
-32    80     
16     64     
-96    -16    
96     128    
-32    64     
-64    112    
272    176    
144    -192   
64     80     
-16    -128   
48     80     
80     -656   
-32    -48    
160    -192   
0      208    
144    32     
-144   80     
224    144    
-48    96     
80     112    
288    176    
-64    96     
176    -48    
-240   -160   
112    -144   
400    128    
-272   -608   
96     48     
112    -240   
16     0      
-64    160    
160    112    
-80    -48    
-16    48     
128    0      
176    -144   
-64    80     
48     176    
96     160    
-32    -160   
144    -16    
112    -128   
16     0      
64     -48    
-80    -64    
208    -144   
304    320    
-144   128    
-32    -720   
160    48     
-64    -144   
160    -176   
0      -176   
96     -160   
128    -80    
-208   -112   
272    -64    
64     144    
-144   80     
80     48     
-48    -288   
224    -960   
-112   -16    
48     -496   
128    -192   
144    16     
176    32     
32     -112   
16     -1152  
144    -224   
0      160    
80     -48    
0      96     
64     -288   
96     -336   
-48    80     
32     -80    
-80    96     
64     -112   
16     -272   
-832   -64    
176    -160   
-64    -96    
-16    -160   
96     -96    
144    -480   
128    -48    
16     112    
0      -96    
32     16     
-208   -16    
96     -128   
-80    -208   
-16    -240   
-80    -112   
-544   -16    
-176   -112   
224    64     
384    304    
-112   448    
-128   -256   
160    -304   
-16    -1776  
304    -304   
96     80     
-32    224    
-16    64     
80     -16    
-176   -16    
-16    -112   
32     -176   
-64    -176   
176    256    
-256   -192   
272    -304   
0      -96    
368    -32    
16     -256   
224    160    
176    -48    
-16    32     
64     32     
224    -16    
-48    48     
-32    -80    
32     176    
-48    -672   
-96    544    
144    -32    
-208   -528   
512    608    
-304   96     
112    -176   
-256   -96    
176    -1712  
192    352    
80     176    
144    -32    
0      0      
128    -80    
-256   -32    
16     -432   
-176   144    
160    -64    
-384   -304   
-32    160    
0      -32    
-64    -528   
32     176    
144    -1968  
-96    144    
240    -288   
-64    192    
208    416    
-160   -32    
64     -240   
-128   64     
-16    -80    
176    -48    
-16    128    
224    -304   
-256   240    
208    -336   
-64    96     
80     -352   
16     -560   
-240   128    
176    -160   
-48    -192   
0      16     
-128   208    
208    736    
-64    496    
48     -192   
-272   16     
-64    -368   
-80    480    
-16    -208   
48     192    
-80    -128   
112    -208   
-16    224    
-176   -48    
-208   -464   
272    800    
-64    64     
176    -464   
-320   336    
-80    -320   
-736   -160   
48     -96    
560    432    
-208   144    
240    -80    
-928   96     
-768   288    
-176   -192   
288    -416   
-208   480    
0      -144   
48     32     
-16    144    
-80    -80    
320    128    
-160   48     
-1136  32     
400    48     
-1312  -144   
112    0      
-80    0      
-192   -288   
-192   -16    
-64    176    
32     512    
-592   80     
-48    -416   
48     144    
64     272    
48     -80    
-32    192    
64     192    
-368   -16    
32     -304   
64     272    
48     768    
64     -576   
-192   16     
-384   -112   
-240   -208   
-672   256    
-160   -112   
192    -288   
160    48     
-624   848    
16     960    
-208   -96    
48     -448   
-400   -768   
528    -128   
-528   96     
80     48     
16     144    
-16    0      
-144   48     
0      64     
-16    0      
-560   32     
-96    16     
-16    -112   
-48    32     
208    -16    
-240   288    
240    336    
-192   -320   
144    -32    
-144   256    
-64    96     
-16    -32    
112    -64    
-368   -272   
208    -32    
-576   224    
112    -16    
352    -48    
0      176    
128    -112   
-16    80     
32     96     
16     -144   
-144   -208   
224    496    
16     304    
160    160    
-224   -80    
-48    -16    
-144   -208   
-224   -160   
-96    -208   
-400   -32    
208    592    
80     288    
-240   -80    
80     304    
32     32     
-48    -144   
-16    16     
-16    -48    
-48    32     
64     192    
-80    160    
-64    16     
-80    256    
-96    32     
144    -32    
48     112    
48     -64    
-112   112    
32     80     
128    176    
-144   144    
-96    80     
16     112    
-112   64     
-48    144    
-160   0      
48     32     
-256   -32    
-16    -96    
-352   -112   
0      112    
-784   0      
-80    0      
240    144    
48     224    
-176   -80    
48     16     
-80    80     
128    48     
-112   80     
-80    -32    
-48    -16    
-224   -32    
32     112    
-448   -288   
224    144    
16     64     
-16    48     
48     144    
-16    32     
32     144    
112    160    
80     144    
208    64     
-112   112    
-48    32     
-16    80     
-64    -16    
112    64     
-96    32     
-144   -16    
-112   112    
-32    -80    
-128   -128   
592    704    
-336   672    
-48    352    
16     288    
-352   -64    
0      -160   
-224   -224   
64     224    
0      96     
64     -32    
-96    -80    
-80    128    
-32    48     
176    16     
80     -48    
128    128    
48     -16    
32     128    
48     0      
-16    0      
112    176    
32     96     
0      64     
-96    -48    
96     160    
16     32     
-32    32     
416    144    
-32    96     
-128   80     
32     336    
272    288    
-64    96     
-256   -128   
256    -112   
-48    96     
-48    -48    
112    112    
48     -64    
96     80     
80     80     
96     240    
-128   64     
160    -16    
240    -16    
-112   -32    
208    -112   
192    208    
352    16     
112    80     
-32    -112   
64     96     
224    144    
-176   -16    
64     -1104  
176    96     
-48    48     
32     64     
-64    -96    
336    48     
0      48     
96     48     
16     128    
96     64     
-208   -224   
-48    -80    
-64    -192   
48     96     
96     64     
0      -560   
176    128    
-80    0      
112    144    
192    32     
-144   64     
112    -32    
-80    -80    
32     32     
96     80     
-32    320    
144    112    
-128   -256   
208    96     
-400   0      
-128   -592   
176    208    
-48    144    
-48    112    
96     144    
-80    48     
-16    64     
112    144    
-16    -32    
176    16     
112    0      
240    224    
-64    64     
-192   64     
304    160    
-48    -272   
-16    80     
-80    -2064  
112    96     
112    96     
-176   96     
304    96     
-160   128    
96     112    
-16    80     
48     -16    
80     112    
-80    -64    
0      -32    
48     64     
112    -80    
0      96     
144    -704   
224    352    
0      112    
16     80     
160    112    
-16    176    
224    688    
48     272    
-176   48     
-32    -192   
-128   -240   
-96    -208   
176    -112   
-32    -48    
96     208    
-16    -48    
64     16     
16     -1232  
64     304    
48     192    
16     304    
-16    432    
64     400    
48     240    
-112   -224   
-112   -224   
144    0      
-144   112    
112    -176   
-64    48     
48     -416   
144    -96    
176    -144   
-80    224    
-64    -416   
288    64     
-144   224    
192    160    
-192   96     
64     112    
-112   -96    
416    -256   
-32    384    
160    -464   
144    400    
-32    -192   
32     96     
-16    -992   
80     -48    
-80    48     
80     0      
16     16     
32     0      
64     48     
80     -352   
-16    32     
16     -240   
240    208    
112    320    
96     352    
-80    144    
32     144    
64     -544   
-64    -320   
400    -48    
-16    448    
48     16     
48     32     
224    -208   
-304   -384   
192    224    
-112   496    
0      -336   
240    -112   
0      128    
128    -384   
96     -32    
304    -80    
96     384    
144    400    
-304   208    
192    -240   
224    -496   
400    -48    
-160   64     
256    -816   
80     -16    
32     608    
192    -48    
-112   96     
192    64     
-160   96     
144    -240   
48     -1552  
-96    -336   
-80    -208   
48     32     
144    112    
64     -240   
-48    80     
96     -160   
80     -48    
64     -1056  
-256   608    
432    0      
-160   208    
16     32     
64     -368   
16     -272   
144    -64    
-160   -64    
-16    -32    
144    48     
-96    64     
-240   -128   
224    -176   
-240   -464   
656    48     
304    1312   
-144   -544   
-112   -720   
592    -64    
-112   96     
496    -16    
-320   176    
320    -288   
256    256    
-400   -16    
304    32     
-1360  -304   
720    464    
-288   -80    
736    832    
-512   -416   
400    -128   
224    -16    
-32    96     
-288   -192   
256    -496   
16     384    
-144   112    
528    240    
-240   32     
272    -128   
-304   16     
192    0      
-496   208    
-240   -240   
144    464    
-112   -656   
352    320    
-336   -352   
144    128    
-64    -176   
-144   448    
272    -336   
224    64     
-176   352    
144    -160   
192    336    
-224   -240   
-496   -64    
0      112    
-144   -96    
-32    -112   
32     64     
80     -224   
-224   -176   
384    -1920  
0      736    
160    144    
-48    -416   
-80    192    
-16    160    
-128   -48    
-80    144    
0      128    
48     64     
-112   80     
176    48     
-80    0      
112    -192   
16     96     
96     -1440  
0      112    
32     48     
96     -464   
-192   -208   
288    -64    
-432   160    
0      32     
128    384    
-48    240    
-288   -48    
48     -80    
0      -16    
96     -240   
-144   -176   
256    -288   
32     80     
-240   -176   
80     -480   
-336   -80    
144    -32    
-288   0      
192    48     
-208   128    
16     -144   
-336   -16    
32     -336   
64     128    
0      -144   
80     -16    
144    -368   
16     48     
96     -128   
48     32     
-112   112    
80     0      
-96    16     
80     32     
32     192    
-192   -80    
80     32     
128    -32    
80     96     
-720   -112   
80     64     
0      -48    
-816   -48    
96     32     
-416   224    
96     48     
208    -32    
-192   -144   
160    -96    
-16    -80    
112    -128   
0      -160   
176    -240   
64     176    
-32    -112   
-16    160    
16     48     
-240   128    
32     64     
64     16     
-160   -48    
-592   -48    
-80    -48    
-32    -128   
-208   -96    
176    -80    
176    256    
-224   -160   
48     128    
32     -240   
112    -48    
-16    80     
16     16     
-64    16     
-96    304    
32     192    
-240   208    
-224   64     
16     80     
96     48     
-736   -336   
272    -144   
-416   -64    
128    64     
64     -48    
112    160    
64     160    
-384   -96    
32     -176   
-96    -64    
208    128    
-192   240    
16     64     
-416   0      
-112   80     
272    -16    
-48    64     
288    128    
208    288    
80     256    
96     128    
-16    64     
-176   -336   
160    -64    
144    -48    
80     -128   
320    -144   
-96    -224   
-672   -208   
-208   -128   
384    -112   
-144   -528   
-64    -560   
256    -48    
-672   -144   
112    -208   
-192   48     
-208   64     
-16    48     
-80    96     
0      -112   
-240   176    
80     -80    
-224   -80    
144    16     
-432   80     
256    96     
-144   32     
-48    48     
-192   -304   
-160   -176   
128    80     
-336   96     
304    112    
-256   16     
-96    80     
-144   32     
-96    64     
-224   32     
-208   -16    
-320   -176   
64     128    
-176   -192   
96     144    
0      48     
64     64     
-32    48     
96     80     
-112   80     
80     32     
-32    32     
32     48     
-112   0      
-128   -96    
96     48     
-304   -48    
-32    96     
-48    48     
32     208    
192    128    
-176   16     
-80    0      
32     16     
48     32     
-32    80     
0      64     
16     0      
96     48     
-96    48     
128    208    
-96    -64    
16     128    
160    336    
-160   16     
-112   16     
32     48     
0      96     
-16    64     
64     16     
16     -64    
-80    -144   
-128   -32    
-16    160    
-32    64     
16     368    
-112   208    
208    688    
-80    176    
16     -240   
64     -64    
112    -32    
-96    64     
176    64     
-32    80     
-64    0      
-16    96     
-112   -16    
0      80     
64     624    
160    544    
-64    240    
128    912    
80     64     
-368   -400   
128    112    
144    304    
32     160    
-32    96     
160    160    
-96    192    
-112   -160   
80     96     
96     144    
-176   -112   
272    -224   
-192   384    
176    -96    
-192   -16    
128    32     
16     112    
-96    96     
144    864    
-272   -448   
48     80     
-96    80     
32     -64    
0      240    
48     48     
-96    192    
64     -256   
-96    32     
160    784    
192    1328   
-80    448    
-192   -480   
-16    -432   
-96    64     
-48    16     
112    64     
0      16     
0      -16    
-208   -128   
224    -48    
-128   64     
48     -1008  
-16    160    
128    96     
-64    64     
144    96     
-64    112    
128    208    
64     288    
96     -16    
16     32     
112    0      
48     16     
96     48     
320    352    
-192   288    
-112   -16    
-368   -288   
480    -640   
-80    -448   
416    96     
112    96     
192    0      
96     128    
320    224    
-96    96     
-144   32     
-80    -128   
-336   -416   
80     -80    
-336   -96    
256    -752   
80     0      
112    160    
-192   -32    
560    -112   
-208   128    
432    96     
-64    -16    
-272   -544   
-80    -560   
-208   -368   
192    -96    
16     16     
48     -48    
400    384    
-160   -416   
224    -80    
-16    -1328  
112    -144   
-80    112    
32     48     
128    336    
-64    160    
96     304    
112    160    
-64    -384   
304    -144   
-480   -272   
304    -16    
96     400    
128    224    
192    96     
-16    -112   
-48    -224   
0      0      
80     384    
288    96     
640    752    
-624   -208   
208    -272   
-128   144    
-16    96     
-16    48     
80     -272   
-32    432    
64     -336   
480    288    
-368   -512   
80     -176   
-48    -1072  
16     -16    
-112   80     
-16    -32    
-160   -112   
64     352    
-144   240    
-224   -528   
64     160    
272    480    
-176   -16    
16     -208   
96     80     
64     96     
-208   -240   
32     -384   
-48    240    
0      96     
-144   -192   
-64    -192   
96     -64    
-80    -16    
-48    -16    
64     0      
416    160    
192    304    
32     -48    
288    112    
-176   128    
64     144    
-128   -128   
224    144    
-240   80     
144    64     
336    -160   
-208   -240   
16     -48    
112    -624   
192    112    
448    -192   
-160   576    
-48    96     
-16    -32    
16     -176   
272    -48    
-16    -272   
16     -224   
-48    -208   
112    -80    
-176   16     
128    -32    
64     112    
112    -96    
-64    80     
192    -80    
304    272    
-208   96     
368    -80    
-240   -432   
336    192    
-176   144    
176    192    
128    272    
48     -448   
-16    16     
176    -384   
128    -592   
48     -48    
-32    -672   
0      -16    
32     -1584  
128    -64    
-64    240    
32     48     
64     80     
144    16     
288    -32    
-240   0      
112    176    
192    -64    
-464   -32    
64     -96    
-80    -112   
0      -32    
320    208    
-160   -160   
96     -128   
224    -832   
-112   -160   
-32    48     
160    -64    
-64    -224   
160    -32    
32     -272   
144    32     
-80    -16    
128    -64    
-704   -16    
128    -144   
-16    -96    
112    -112   
80     64     
-48    -128   
112    16     
32     -544   
48     176    
-80    -208   
0      0      
144    -80    
-32    -64    
96     32     
-48    -32    
-192   48     
-112   -144   
272    144    
-192   32     
80     16     
288    -656   
16     -32    
80     -848   
-64    48     
144    64     
224    48     
-112   -112   
16     -672   
-64    -320   
96     160    
64     608    
-48    80     
-1200  -80    
176    -96    
-80    -32    
96     -352   
-112   32     
128    -512   
-144   16     
176    48     
-288   112    
-64    -112   
-80    -64    
-64    0      
64     144    
-96    48     
80     32     
-784   -144   
160    -80    
-128   -96    
128    -32    
-16    -16    
32     -112   
144    144    
0      -1104  
0      160    
48     400    
272    208    
-144   -112   
160    -96    
288    -48    
-320   -64    
0      -96    
16     32     
-496   112    
-16    -160   
-16    112    
176    -288   
-48    32     
288    -2352  
-304   -720   
112    0      
-48    144    
-256   -176   
64     -96    
-144   -64    
112    32     
-144   16     
-48    -96    
-112   -80    
256    -80    
16     -64    
0      -320   
64     64     
48     -624   
16     80     
80     -144   
-32    -64    
-80    80     
-288   -592   
144    144    
0      80     
-224   32     
16     32     
-32    0      
-48    -128   
112    272    
-240   -208   
144    160    
64     128    
-320   -128   
64     96     
48     -16    
128    96     
0      16     
64     -32    
-48    32     
16     16     
-96    -16    
160    96     
48     0      
176    160    
-512   -80    
112    80     
16     16     
-192   -208   
-64    80     
-1360  80     
-288   80     
32     0      
32     -16    
0      -144   
-16    -48    
32     -48    
48     64     
64     -80    
-128   144    
-208   -224   
-304   -16    
-64    16     
-48    48     
-16    16     
416    480    
-256   160    
-432   80     
-16    208    
112    192    
-176   160    
48     96     
-80    48     
-224   -208   
208    176    
-112   -112   
-80    0      
-80    48     
96     128    
-64    64     
-288   -640   
-192   -368   
-48    -288   
-160   -432   
-1040  -16    
96     368    
96     32     
80     16     
-336   -528   
336    0      
16     672    
-32    0      
80     48     
-384   -560   
128    576    
-288   -288   
96     -208   
-208   48     
48     96     
-336   64     
-272   32     
352    -32    
-128   80     
0      -96    
32     96     
32     64     
0      80     
112    144    
-192   256    
32     -160   
336    288    
-64    256    
-32    -560   
-128   144    
-144   -48    
128    16     
-480   48     
160    512    
0      192    
-96    80     
48     112    
64     208    
-176   144    
32     160    
-64    -16    
-32    48     
-16    -16    
-160   -48    
128    272    
-320   -128   
64     16     
-752   -80    
96     80     
-96    -16    
-112   80     
-112   176    
-96    -48    
176    240    
-224   32     
160    -96    
-352   64     
48     96     
-64    -272   
-192   112    
-352   -272   
-48    -192   
-592   -32    
-96    16     
96     192    
-144   176    
-16    -32    
0      64     
144    112    
-96    -64    
-32    32     
-32    0      
-96    -16    
-96    96     
272    112    
-288   -224   
144    -256   
-160   304    
336    384    
-48    208    
112    112    
-96    272    
144    0      
64     224    
-96    64     
-96    64     
0      112    
480    976    
-240   496    
-16    -64    
-400   -64    
320    -80    
-384   16     
240    -32    
-16    144    
-16    -336   
192    -400   
160    224    
96     432    
80     192    
-176   -304   
144    -80    
128    160    
-192   -320   
560    480    
-400   400    
-528   -512   
-144   -1136  
304    -304   
240    656    
80     272    
176    16     
144    208    
-144   64     
16     -144   
-176   -176   
-192   16     
-304   -592   
32     -624   
-96    288    
-96    48     
176    192    
128    560    
-448   -640   
-64    160    
-48    -96    
272    560    
48     272    
32     -336   
-368   -688   
128    -96    
16     224    
160    16     
80     -224   
-176   -240   
112    -96    
0      112    
400    464    
192    160    
32     176    
64     288    
208    -96    
-192   -112   
256    128    
-144   112    
-144   80     
-208   -288   
-160   -64    
160    -64    
-96    0      
-160   -64    
-48    -16    
16     32     
128    320    
64     112    
64     96     
176    144    
-64    144    
32     576    
64     272    
-32    32     
208    64     
208    160    
-256   -32    
0      48     
160    -96    
-96    -752   
240    192    
64     208    
-16    64     
-64    32     
208    128    
-176   0      
48     80     
320    240    
-144   48     
160    240    
160    144    
-112   -96    
176    112    
96     32     
112    -752   
-16    32     
32     96     
-112   144    
96     176    
-80    80     
-64    64     
48     128    
0      32     
-80    64     
0      -32    
144    128    
-160   0      
144    128    
48     112    
-64    -592   
208    16     
128    80     
96     64     
80     96     
-32    96     
32     48     
192    256    
-144   -48    
0      144    
176    64     
-160   160    
48     96     
-128   -16    
256    144    
48     16     
32     96     
-64    -864   
32     16     
48     96     
112    64     
-80    48     
144    160    
-80    32     
96     48     
-48    80     
192    144    
-112   -16    
-32    -160   
128    -32    
272    0      
-176   112    
96     -128   
0      80     
128    64     
80     80     
-144   -496   
176    48     
192    64     
112    80     
-96    16     
224    64     
16     16     
112    -48    
128    64     
0      -208   
144    0      
160    -432   
-80    64     
48     -1552  
64     144    
-96    -208   
112    32     
112    16     
-16    96     
-32    -16    
144    112    
160    144    
-32    -48    
432    272    
-288   -128   
160    192    
32     -352   
176    192    
-112   -112   
176    112    
16     32     
-16    176    
48     -48    
160    144    
208    112    
-176   80     
224    144    
176    -224   
-80    256    
80     -544   
-64    80     
-80    0      
240    352    
-176   -128   
48     -32    
96     -144   
176    160    
-144   -16    
96     144    
-32    0      
144    -288   
0      112    
272    -96    
-336   192    
272    80     
-288   208    
128    -48    
-32    48     
-80    -272   
96     160    
-32    96     
80     80     
112    48     
0      -1792  
16     -128   
192    -144   
16     -528   
112    -48    
-16    80     
128    -176   
0      80     
32     48     
-224   0      
304    160    
-48    -528   
112    -96    
80     -224   
128    64     
-32    -656   
128    -208   
48     -112   
0      48     
96     -64    
480    -80    
-160   352    
-128   160    
144    -240   
176    64     
-32    -112   
48     -656   
64     0      
80     -320   
-144   64     
0      -32    
32     -176   
96     16     
48     -64    
128    -160   
48     -288   
0      -64    
256    64     
-208   64     
-32    -16    
160    64     
-112   32     
48     0      
-32    -96    
32     -128   
64     240    
64     -32    
-32    112    
208    -304   
-192   16     
592    -112   
-272   80     
128    -320   
48     512    
304    288    
-304   -144   
0      -208   
160    -224   
64     32     
0      -32    
-208   -64    
-16    -80    
-688   -112   
0      -160   
304    16     
-80    -176   
64     -176   
112    -528   
384    -48    
-144   -1264  
256    160    
0      0      
16     176    
64     32     
48     144    
80     192    
-112   0      
-464   144    
-128   -320   
-560   96     
64     112    
16     240    
304    96     
-96    240    
160    -304   
-304   -368   
48     -160   
176    448    
-192   192    
-64    -224   
-16    368    
0      -256   
48     -176   
48     48     
-256   64     
32     -336   
-48    224    
192    -400   
-128   32     
288    -320   
-192   208    
176    -560   
48     160    
-96    128    
-16    -64    
112    416    
-64    -64    
80     -32    
112    112    
-384   -80    
-80    -256   
-176   48     
48     -144   
64     144    
0      -592   
48     32     
128    -1440  
16     0      
-48    32     
16     80     
-64    48     
48     -16    
-192   -64    
80     0      
-48    32     
96     416    
64     112    
48     -192   
-80    256    
256    -352   
-160   128    
-144   80     
32     -32    
-16    80     
16     -80    
-112   64     
96     -48    
-80    -32    
96     -16    
-128   48     
0      -144   
-96    -240   
64     -128   
96     80     
-32    -64    
128    80     
-48    96     
-1488  -80    
64     -96    
-96    96     
32     32     
80     -64    
128    -16    
80     -16    
-256   -48    
192    -80    
-64    32     
-496   -128   
-304   -768   
-96    -736   
-304   240    
-192   -48    
-144   -320   
16     0      
-736   128    
0      0      
128    112    
-48    48     
80     16     
-48    16     
-256   -112   
64     112    
176    0      
-96    80     
-288   -128   
-256   16     
-48    -64    
48     288    
224    480    
96     880    
96     352    
-208   -96    
48     160    
-144   -192   
48     352    
0      224    
112    -64    
-608   -624   
-528   -1136  
336    -256   
-176   1056   
128    208    
-256   -272   
-64    -288   
-336   -240   
-32    208    
-336   112    
-32    320    
-1056  464    
-208   -16    
64     -224   
-112   96     
160    48     
-336   -256   
-32    -416   
240    400    
0      80     
-48    -160   
-96    -32    
-96    -144   
64     0      
-16    112    
64     -80    
-240   0      
160    208    
-176   0      
144    48     
-16    64     
-240   -416   
-144   -48    
-80    192    
-144   96     
-64    48     
-176   288    
-16    240    
32     288    
-96    32     
-64    192    
-256   -144   
96     272    
-1216  -144   
96     208    
208    32     
-16    48     
-176   -16    
416    192    
-240   -320   
-144   -64    
352    32     
-592   176    
160    16     
-240   0      
80     0      
-64    288    
-32    0      
112    96     
-80    160    
432    224    
-384   -48    
192    160    
-48    32     
64     16     
32     48     
112    112    
-160   48     
64     96     
80     176    
-128   128    
-64    64     
240    208    
-96    -48    
-64    48     
64     64     
160    144    
-352   64     
112    48     
80     96     
-48    64     
-64    -16    
-32    16     
-16    64     
-112   0      
16     112    
32     32     
-32    176    
-96    -128   
-80    32     
320    256    
-256   48     
112    160    
-32    48     
-32    48     
48     -80    
-112   -32    
128    160    
-96    -32    
16     -80    
128    224    
-32    -48    
80     96     
-224   32     
-64    48     
0      80     
32     128    
-48    -48    
160    272    
-16    -32    
-48    32     
288    96     
112    48     
112    96     
-224   16     
96     96     
-192   -80    
160    128    
112    0      
16     96     
192    48     
-144   32     
112    32     
-32    48     
-80    32     
-96    -80    
32     48     
0      16     
0      160    
-176   -48    
32     48     
-192   80     
112    128    
128    128    
32     32     
0      272    
272    80     
-192   -16    
192    80     
-48    -16    
112    -112   
-144   112    
208    -16    
-48    112    
32     96     
144    144    
-144   128    
128    64     
48     64     
96     -64    
-112   -112   
224    192    
-48    48     
80     112    
16     -64    
-16    64     
144    16     
-80    112    
-64    32     
0      112    
160    80     
-48    80     
16     16     
192    96     
0      16     
48     80     
160    160    
32     192    
-80    80     
-160   -288   
192    -16    
-32    352    
0      112    
32     16     
96     0      
-112   64     
160    160    
112    -560   
-112   0      
112    128    
160    112    
32     64     
32     80     
-16    32     
-80    112    
-16    288    
160    192    
-16    48     
-48    -16    
144    -176   
-16    160    
-64    0      
128    -368   
96     64     
144    160    
-112   192    
112    240    
-80    160    
-32    80     
320    144    
-176   0      
144    64     
-16    -160   
64     128    
-32    96     
-160   -48    
80     -16    
-128   -528   
192    128    
-192   80     
0      48     
-64    96     
80     128    
-16    80     
0      48     
-192   -272   
80     -48    
48     0      
32     48     
32     96     
-64    -192   
-48    32     
176    -208   
0      160    
48     -1184  
64     144    
-16    32     
-16    128    
-128   80     
544    592    
-432   688    
-160   288    
16     512    
160    320    
-192   -352   
32     -384   
192    -160   
-16    112    
240    240    
-256   64     
112    112    
-176   144    
160    32     
-16    -16    
144    96     
-96    0      
-112   -32    
-16    -304   
0      -16    
480    544    
-448   192    
0      112    
-32    -96    
128    48     
176    -352   
-80    64     
368    -192   
-128   192    
112    32     
-176   -64    
64     -400   
160    -128   
16     -80    
80     -16    
64     176    
-240   192    
240    160    
80     160    
-48    400    
0      -896   
0      128    
-32    -64    
16     112    
80     16     
0      16     
96     -144   
80     -16    
256    64     
192    64     
-48    144    
80     -288   
96     368    
16     -416   
-48    192    
80     -592   
176    96     
32     -160   
32     160    
16     112    
128    80     
-64    96     
112    80     
32     80     
-16    -400   
-112   -64    
96     160    
-48    -544   
112    128    
240    688    
-16    -32    
-64    -32    
96     -64    
80     64     
-16    64     
32     -32    
112    96     
16     -144   
320    -48    
-320   144    
80     -672   
-16    -368   
96     80     
80     -144   
-16    128    
48     -240   
-144   -176   
128    -304   
224    32     
96     448    
-144   -192   
112    -48    
-960   -32    
224    -96    
64     0      
64     160    
48     -16    
32     -96    
-64    -144   
112    368    
16     -176   
48     80     
32     16     
96     -80    
16     64     
-272   -256   
352    -304   
-416   -128   
176    -48    
-192   256    
96     -208   
96     -48    
-48    -144   
160    -96    
32     -208   
144    256    
128    -144   
48     -16    
160    -16    
0      32     
32     -112   
80     -64    
-272   16     
96     0      
-176   -48    
0      -160   
48     -128   
48     -576   
-64    -288   
144    -528   
288    160    
160    480    
-128   80     
160    16     
0      160    
96     -304   
-64    -80    
-48    -320   
-512   -992   
-960   -608   
-48    -80    
352    112    
16     320    
112    48     
112    -32    
96     64     
80     -1296  
-32    128    
144    -80    
96     176    
-48    -16    
224    608    
-192   0      
48     -304   
-96    80     
64     -96    
112    288    
192    816    
-96    -560   
368    -400   
208    592    
-48    -192   
32     -144   
-16    -128   
16     192    
-48    -96    
80     -272   
64     -320   
160    448    
-64    288    
128    -592   
-512   -16    
80     16     
-640   304    
-240   -112   
-32    16     
-32    -432   
80     128    
-112   -1440  
-128   -192   
112    -352   
-32    32     
16     -32    
80     16     
-224   -48    
176    -64    
-96    -112   
112    -272   
-304   -48    
240    -192   
-32    160    
128    -96    
-128   80     
-48    -1040  
96     -208   
32     96     
32     224    
-368   -64    
480    48     
-496   320    
16     -16    
-464   -160   
-16    -112   
80     -80    
-208   -64    
0      -144   
-240   -368   
368    176    
-416   176    
224    -48    
-240   16     
288    64     
-272   -48    
96     -48    
-144   -64    
32     -48    
-64    32     
208    48     
-832   144    
112    -80    
-224   176    
-1264  -112   
16     32     
64     176    
-736   -48    
480    192    
-1344  -64    
384    -64    
-384   144    
192    -64    
-288   64     
-112   128    
-528   -64    
16     208    
-576   -96    
32     16     
-176   -160   
-320   0      
-64    -16    
-416   -16    
-128   -16    
-160   48     
0      -16    
-720   -80    
80     -112   
64     -192   
32     0      
-80    -128   
144    144    
-192   -32    
80     48     
-16    -224   
-96    48     
-16    0      
-208   48     
48     64     
64     80     
-176   -64    
-544   32     
32     -96    
-144   -96    
-32    32     
-112   -48    
48     16     
-208   -128   
80     128    
-32    -16    
-32    96     
16     48     
160    256    
-224   80     
-176   80     
64     48     
-80    -80    
48     -32    
-272   64     
-16    80     
336    464    
-304   128    
-176   -96    
16     48     
16     112    
-16    16     
-112   32     
128    64     
16     96     
-240   -48    
16     -144   
96     400    
-16    160    
-496   48     
-48    -160   
-64    -224   
-48    16     
32     -64    
32     144    
-80    80     
304    448    
-656   112    
-16    -96    
0      48     
-160   0      
16     160    
-96    -16    
96     32     
-64    -144   
176    64     
-2368  -64    
144    160    
-176   64     
80     128    
144    144    
-224   80     
48     128    
-112   96     
128    48     
64     64     
-16    16     
-112   48     
48     0      
-144   -32    
32     64     
-144   -16    
176    176    
-208   64     
-16    32     
16     -176   
0      -64    
48     96     
80     48     
48     48     
-80    0      
48     144    
-64    -16    
-16    32     
-48    -64    
80     192    
-16    -128   
-32    -384   
96     64     
-96    0      
96     -16    
-80    128    
208    16     
-128   16     
64     80     
-240   0      
208    64     
-144   16     
32     48     
-48    48     
32     80     
-64    -160   
0      64     
32     64     
-112   96     
272    96     
256    224    
-240   160    
96     96     
-176   32     
224    128    
-96    224    
-96    144    
-48    80     
-384   -144   
368    16     
-112   32     
-16    320    
-16    336    
176    496    
192    240    
-64    224    
-48    304    
-208   64     
128    -64    
128    272    
64     -160   
-192   -32    
128    128    
-64    32     
0      112    
-144   48     
176    64     
16     32     
-96    80     
-224   -48    
-192   -624   
-176   -448   
176    -32    
-112   -64    
16     -16    
-64    32     
0      32     
64     176    
-208   48     
384    128    
-48    256    
304    368    
-64    320    
128    16     
352    496    
-144   48     
-80    -272   
-64    -240   
64     80     
208    128    
-32    128    
96     128    
0      160    
64     192    
-112   64     
112    384    
0      416    
32     384    
-48    256    
-144   -336   
-80    -368   
-32    0      
96     352    
0      80     
-240   16     
192    400    
112    176    
-48    336    
-112   32     
-96    -128   
144    -96    
-64    272    
240    208    
-256   -176   
0      144    
64     0      
224    784    
-240   48     
16     -704   
-112   464    
320    -304   
-48    288    
-48    -32    
160    -240   
416    -752   
-64    320    
-144   -240   
112    -96    
416    656    
-112   96     
128    1008   
320    -208   
-144   -320   
-64    -112   
176    48     
208    160    
32     32     
64     -144   
192    96     
-144   -32    
192    80     
48     48     
32     -16    
112    0      
-48    176    
-64    0      
96     -272   
0      -80    
320    -288   
-80    -464   
64     432    
272    512    
-48    -112   
208    48     
-144   -304   
128    32     
-32    -128   
-16    0      
304    -32    
-112   192    
128    64     
-16    -32    
32     16     
128    64     
-32    160    
112    208    
-48    64     
96     -304   
64     256    
176    -384   
-32    0      
48     -560   
112    -176   
32     176    
-16    0      
-80    -240   
48     80     
48     64     
80     64     
-16    64     
64     112    
32     96     
16     -96    
64     96     
160    -48    
-32    416    
112    128    
352    688    
-272   464    
-32    -48    
96     112    
32     144    
0      -128   
64     -48    
-96    -112   
-80    -432   
64     80     
-96    -112   
240    160    
-320   -608   
592    48     
-16    -400   
112    144    
48     -1424  
0      496    
64     112    
128    144    
-208   176    
192    80     
-80    48     
0      64     
48     208    
-112   -464   
304    16     
16     288    
336    144    
32     48     
-32    48     
320    -496   
-48    352    
128    96     
96     -16    
-112   128    
80     32     
-48    208    
32     -160   
16     -32    
96     -64    
16     208    
-240   -976   
192    384    
208    336    
-112   432    
176    -176   
-64    -192   
176    48     
-128   400    
240    144    
0      -128   
-48    320    
0      32     
-80    112    
272    -64    
-64    368    
64     -112   
32     -160   
64     -96    
288    304    
160    80     
16     -1200  
64     128    
-48    -864   
144    48     
-1264  -144   
160    -608   
176    -48    
-64    -816   
176    -80    
64     48     
144    0      
144    192    
-32    -144   
-16    -256   
176    272    
-64    160    
96     176    
80     -144   
96     224    
-1072  -256   
432    -144   
-256   32     
240    -32    
-80    80     
112    -208   
144    0      
-160   -96    
336    -32    
-144   -336   
-224   -480   
288    -304   
-16    -224   
320    -224   
-144   -608   
-736   -400   
-112   -32    
160    224    
-96    96     
16     64     
160    -160   
32     -112   
112    -1840  
64     -80    
-112   -400   
-80    -16    
96     -224   
432    240    
-176   -128   
208    -16    
-176   48     
224    208    
-784   -16    
-208   -272   
128    0      
-16    48     
-16    -16    
-128   80     
240    96     
16     -832   
-160   192    
128    -160   
0      96     
-32    96     
-96    128    
-48    112    
-176   -304   
-272   -240   
-48    -192   
-352   128    
-96    -192   
144    48     
112    -16    
-176   -96    
96     -1552  
48     -80    
-176   -192   
256    -160   
16     48     
0      368    
-256   -48    
-336   -176   
-304   -80    
48     -80    
-432   48     
-16    -16    
-96    -64    
32     -352   
-144   -32    
-128   -400   
16     32     
48     48     
96     80     
-128   -16    
16     -128   
0      128    
-192   96     
0      32     
16     16     
-192   -48    
192    -80    
-96    -144   
224    -208   
32     144    
160    -16    
16     112    
96     -896   
176    -112   
0      -128   
-32    -64    
48     48     
-240   64     
32     48     
32     -96    
144    48     
96     0      
16     64     
-64    -224   
224    80     
32     -240   
80     -32    
-432   96     
224    -16    
-192   16     
208    32     
-208   -32    
96     0      
-64    0      
160    -288   
-176   16     
16     16     
-1072  -32    
112    -96    
208    336    
-240   -208   
32     96     
-128   16     
192    -16    
-128   -64    
240    -96    
-160   -96    
112    -16    
-80    176    
-112   64     
128    64     
-160   48     
0      32     
-1520  -96    
-48    64     
-928   -64    
-176   16     
-32    64     
-496   32     
-96    -32    
-272   48     
-96    80     
80     80     
64     224    
112    160    
-128   96     
-272   -96    
208    80     
-224   -128   
32     320    
-48    80     
-464   -144   
-80    -192   
-112   -48    
-160   16     
-208   -160   
112    -80    
-944   -272   
64     -192   
32     -528   
-208   -144   
-256   -304   
-80    144    
112    64     
-208   32     
16     -80    
-128   -128   
0      -64    
-80    -16    
240    240    
-128   160    
-32    -48    
-352   16     
304    48     
-672   -160   
48     -688   
16     -16    
16     288    
80     -64    
48     224    
-64    48     
-176   -144   
272    160    
-96    464    
-160   -144   
96     624    
-80    -208   
-336   -208   
-128   224    
-560   336    
48     -16    
144    -208   
160    336    
-256   -32    
-240   -544   
-16    16     
64     208    
0      128    
-16    0      
128    304    
-144   -96    
-288   -160   
128    48     
128    288    
-496   -544   
0      16     
-16    96     
-80    -32    
112    144    
-80    112    
224    48     
-224   -64    
-128   -144   
-128   -368   
32     -160   
-16    352    
0      48     
96     192    
224    240    
-576   -128   
16     112    
-560   -240   
416    656    
-208   304    
-272   -560   
80     -144   
-64    96     
192    128    
-288   128    
80     -496   
384    0      
112    256    
0      64     
-480   -800   
768    -320   
0      1232   
-416   528    
-144   -416   
192    16     
-288   320    
192    240    
-16    176    
-240   176    
128    -400   
-224   -32    
48     272    
-48    -64    
-64    -16    
-128   48     
-16    304    
-304   320    
-256   -368   
-272   736    
32     -16    
-48    384    
-448   0      
256    -496   
-32    656    
48     160    
16     -256   
-224   224    
-32    -176   
32     480    
-144   -48    
-16    0      
-96    112    
-192   -192   
128    -112   
-80    -16    
128    144    
32     112    
128    160    
-272   48     
96     80     
32     32     
-128   32     
128    80     
-80    144    
176    256    
-336   -144   
192    -128   
240    416    
128    -368   
-160   624    
240    -256   
16     80     
-112   240    
160    -256   
-112   336    
32     -16    
-80    -48    
128    144    
-16    768    
256    -160   
-208   -288   
-16    528    
128    -288   
-112   224    
192    -32    
80     0      
-16    816    
-32    -32    
-80    -336   
-96    176    
-48    -512   
16     320    
320    176    
-16    144    
-64    400    
160    48     
80     32     
-112   64     
144    32     
-32    96     
-16    16     
-16    80     
128    48     
-32    96     
0      -240   
-48    -224   
-32    -224   
-256   -128   
432    288    
-176   528    
-16    -272   
-48    224    
64     80     
160    224    
-352   -128   
144    -208   
-112   144    
144    160    
48     -48    
-112   96     
16     -400   
0      -144   
16     -112   
-32    -80    
224    384    
64     320    
-80    80     
144    208    
128    32     
-128   48     
64     288    
96     48     
-48    48     
-48    176    
48     96     
16     192    
-80    784    
144    512    
-432   352    
272    32     
96     16     
-16    -720   
-80    -144   
0      -80    
16     -64    
-128   -32    
160    48     
16     64     
-16    16     
16     48     
144    64     
-160   -112   
-32    240    
96     80     
-96    -176   
-32    64     
-64    -48    
176    64     
-112   -64    
416    64     
-176   96     
80     112    
112    80     
32     112    
-48    128    
176    -80    
-160   -144   
-16    32     
-128   208    
272    -64    
32     32     
16     -160   
128    144    
-80    48     
0      128    
48     128    
-80    32     
256    32     
0      80     
96     -32    
48     64     
160    112    
192    80     
0      96     
256    64     
144    192    
0      16     
-16    96     
80     -32    
-96    112    
128    128    
48     64     
64     -256   
208    96     
16     -16    
80     0      
0      -48    
48     16     
128    0      
-368   -592   
320    -352   
-128   -160   
416    112    
176    80
[truncated: 368,011 more chars]
