# Supplementary material for: A Fault Diagnosis Method for One‐Dimensional Vibration Signal Based on Multiresolution tlsDMD and Approximate Entropy
Source: Hindawi journal article supplement (doi:10.1155/2019/3262818), 2019-01-01
Supplement: f1 [file 3262818.f1.zip › 3262818.f1/gear signals/wear gear signal/Data7.txt]

-240   96     
192    -384   
320    256    
-208   256    
-16    -288   
304    112    
-48    352    
80     -48    
64     -400   
64     288    
32     -32    
288    320    
-144   288    
-32    208    
176    -64    
-160   48     
112    208    
64     -112   
-48    128    
352    -144   
-176   96     
64     -336   
48     64     
96     0      
48     96     
-128   -336   
208    96     
-96    0      
64     48     
16     80     
-32    -192   
352    144    
-144   -64    
368    176    
-64    -48    
112    192    
-32    -384   
224    -208   
128    -16    
112    160    
64     16     
48     176    
144    272    
-48    112    
96     128    
0      320    
160    -96    
-192   -240   
176    -16    
144    32     
-48    144    
176    -48    
-16    160    
0      -208   
32     16     
-16    -48    
160    -544   
112    80     
48     64     
64     -80    
-16    -288   
240    -640   
-128   -48    
160    -1152  
32     112    
96     64     
64     -384   
-208   80     
0      -320   
96     48     
-32    128    
128    -96    
-304   -160   
96     -720   
240    -144   
-288   384    
-192   0      
224    0      
16     -48    
160    -64    
-96    -160   
208    -48    
-32    64     
16     -480   
-64    -352   
224    432    
32     192    
-32    112    
-112   -80    
64     -256   
-496   -288   
144    208    
80     32     
288    336    
-32    448    
240    -864   
-160   16     
-64    -640   
288    96     
-176   -304   
160    464    
64     -192   
96     96     
-112   432    
80     -128   
-144   -128   
48     -64    
144    -144   
48     -416   
112    -208   
48     -160   
320    304    
48     -272   
-480   -240   
128    0      
-96    256    
64     112    
48     48     
-128   -192   
144    -352   
-320   -208   
64     -32    
-304   0      
-32    32     
512    480    
-224   752    
-16    192    
-64    -368   
0      -80    
-96    -320   
32     -176   
320    16     
0      -16    
-352   0      
16     -336   
-224   -80    
192    -32    
-256   64     
16     -144   
224    -16    
144    -160   
-64    -192   
-112   -272   
752    656    
-912   -1504  
256    80     
-128   176    
64     -176   
48     112    
-144   -48    
48     128    
-64    -96    
-320   0      
96     -304   
-912   -48    
192    -64    
32     0      
0      -192   
64     112    
208    -256   
-112   96     
32     48     
96     -48    
-64    64     
208    112    
-288   -64    
352    80     
-160   112    
176    -128   
0      -48    
384    32     
320    160    
-64    -112   
112    -16    
224    -512   
48     128    
-48    64     
-80    -160   
0      -16    
-80    -96    
0      -80    
192    0      
96     16     
48     128    
64     64     
144    -144   
-128   96     
112    -192   
64     80     
96     -224   
96     -112   
0      144    
112    -32    
-272   -48    
-32    -144   
-256   -96    
128    48     
-48    0      
-64    0      
-64    -16    
-1680  -352   
16     160    
-832   -128   
224    144    
-192   32     
32     16     
-144   80     
-576   0      
-144   0      
112    208    
80     160    
-128   192    
160    160    
-112   0      
32     208    
-1072  -64    
128    -32    
-16    -32    
128    128    
0      64     
-352   -48    
96     80     
-480   -144   
352    16     
-272   96     
-64    -80    
48     -32    
64     112    
-48    -64    
256    320    
-336   -80    
-16    32     
64     16     
-96    -80    
-112   -240   
-96    64     
144    16     
-208   96     
128    144    
-144   -80    
96     -32    
-1296  32     
-80    -192   
64     -240   
96     64     
0      16     
-32    48     
-16    -96    
64     80     
-144   -96    
160    16     
48     48     
-80    16     
-176   0      
16     -48    
-96    64     
96     0      
-96    96     
-48    -32    
176    -32    
-64    16     
0      32     
0      80     
192    112    
-208   128    
-16    32     
-48    48     
-240   -48    
208    80     
-64    128    
-48    80     
-160   96     
192    512    
-1088  -32    
-208   -112   
272    -144   
-16    48     
-96    -48    
288    -64    
-160   16     
-176   0      
96     -32    
-192   -160   
160    -16    
-160   64     
48     16     
-384   -176   
304    112    
-288   -128   
16     80     
32     80     
-48    384    
32     16     
-144   -48    
144    -16    
-16    16     
-48    64     
-112   0      
160    -16    
0      -64    
96     96     
-128   80     
208    144    
-272   -96    
224    224    
-592   64     
-192   16     
64     0      
-192   -256   
80     -176   
112    -48    
80     64     
-80    16     
32     -32    
-176   32     
64     784    
-128   464    
-48    -112   
-128   32     
144    -64    
0      128    
-32    -32    
80     624    
320    0      
-80    -144   
80     64     
0      -48    
-224   0      
144    128    
-112   16     
-48    -96    
-256   -32    
224    -32    
-272   -256   
-48    16     
112    0      
80     48     
64     48     
224    384    
32     -48    
16     -208   
208    -160   
176    32     
368    352    
240    144    
-64    224    
-32    0      
-64    32     
32     -32    
-16    448    
464    496    
-320   368    
144    224    
-64    128    
-112   112    
48     128    
96     0      
-80    64     
-128   0      
16     352    
-160   0      
-400   -208   
48     80     
-16    -192   
-96    -96    
112    16     
-16    224    
96     -208   
160    -112   
-160   32     
288    -368   
-208   272    
144    -128   
-160   128    
-48    -112   
208    496    
-224   16     
160    176    
-192   176    
160    -32    
32     112    
32     48     
-32    80     
64     80     
48     64     
80     96     
48     160    
0      32     
32     32     
-64    -160   
288    224    
-208   400    
0      -624   
128    16     
-80    208    
16     176    
-32    -32    
128    -144   
112    128    
-96    48     
352    128    
-64    512    
-32    464    
144    80     
-144   -144   
256    -160   
-192   96     
176    -1760  
16     176    
-80    32     
464    -48    
-112   976    
192    416    
64     176    
80     320    
0      -112   
-144   64     
256    112    
-32    64     
48     32     
-32    48     
-48    48     
64     -320   
0      96     
64     48     
32     112    
240    144    
-32    496    
-32    304    
-16    -176   
-48    -416   
176    144    
-48    224    
64     64     
32     64     
-32    -16    
16     112    
80     16     
-64    -384   
160    -304   
16     96     
80     -160   
0      16     
160    112    
48     112    
48     272    
0      192    
80     224    
-48    48     
16     -96    
16     32     
48     80     
16     -224   
-16    -16    
-32    -1168  
0      -16    
-304   -176   
48     -464   
224    -224   
-80    448    
80     752    
-272   160    
352    -400   
16     848    
144    224    
-96    -272   
128    96     
-16    -288   
96     32     
-64    -816   
272    -32    
-80    96     
-80    160    
192    -432   
-80    48     
208    32     
-48    -96    
80     192    
32     160    
192    80     
-176   -320   
112    -16    
160    -48    
64     112    
0      -96    
256    -208   
-64    -672   
144    0      
-224   -432   
336    -352   
64     -32    
0      -48    
-160   -304   
160    32     
80     160    
0      48     
-48    80     
-32    16     
192    112    
-80    -592   
272    192    
-352   128    
160    80     
-96    -48    
240    0      
-16    96     
-16    128    
-32    -112   
64     -272   
592    672    
-592   96     
144    -176   
32     -224   
160    208    
144    -16    
-144   0      
224    32     
96     208    
0      64     
256    32     
-256   -608   
-96    -432   
224    64     
16     48     
-48    -48    
288    -16    
80     176    
144    -224   
32     64     
80     -80    
240    16     
32     -128   
160    32     
-48    -752   
144    0      
64     32     
240    -640   
-112   -1552  
128    0      
-48    -2192  
288    -304   
256    0      
-80    -176   
144    144    
-32    -16    
64     -16    
64     -80    
192    192    
-96    -96    
-176   -752   
128    64     
192    128    
-288   -352   
80     -160   
224    -624   
80     -144   
-64    -112   
224    224    
-64    48     
32     -224   
32     64     
224    -160   
-112   -304   
112    208    
-192   80     
336    160    
-32    128    
128    224    
-528   64     
32     32     
144    48     
48     -80    
176    96     
144    -704   
-48    -16    
-48    176    
80     112    
256    288    
-160   112    
48     -16    
-112   128    
-224   -112   
224    0      
-240   -64    
304    -32    
-144   -16    
32     -192   
64     -112   
160    -176   
-32    -32    
48     -1504  
-64    -96    
64     -16    
64     64     
-48    -160   
224    96     
-320   16     
144    112    
-112   208    
-272   -80    
128    -96    
-16    -32    
176    -16    
96     -32    
16     80     
144    -112   
-320   -32    
336    -16    
-32    80     
-80    -64    
288    -160   
-96    128    
272    -96    
-288   -32    
112    -96    
-192   16     
80     16     
-16    48     
176    32     
-112   48     
64     -288   
-16    -16    
64     16     
256    272    
-96    368    
16     -80    
-128   -80    
16     -192   
-192   -80    
192    -64    
-80    -144   
16     48     
-656   -32    
32     -176   
-64    -160   
112    -768   
-112   -128   
208    -1552  
352    384    
-480   288    
32     -176   
-192   -16    
192    16     
-432   -32    
48     64     
-160   -208   
16     0      
-64    16     
-128   -128   
80     0      
48     48     
-16    112    
128    -384   
-48    -192   
-144   -16    
64     64     
-400   64     
80     128    
112    96     
-32    -112   
32     0      
16     -128   
-16    0      
-32    -96    
128    224    
128    -16    
-112   -16    
176    -272   
-144   -176   
0      -80    
-48    -16    
-16    32     
144    48     
-448   -64    
128    96     
-144   0      
-128   -448   
-32    -192   
128    -48    
-176   32     
-704   -224   
416    576    
-480   320    
32     -128   
-224   -112   
128    272    
0      128    
-224   -416   
80     176    
96     256    
-144   64     
144    128    
-144   64     
-464   -256   
-16    -96    
-32    -224   
160    -64    
144    112    
16     0      
48     -208   
-256   176    
-32    128    
-48    -112   
80     112    
-64    -80    
96     144    
-304   -128   
-192   -368   
-224   -288   
-224   -736   
32     160    
-16    160    
-128   96     
64     304    
-144   -192   
-256   -112   
208    160    
-80    32     
-112   384    
-2192  -160   
-80    -32    
-208   -96    
-48    112    
-192   -272   
-128   -320   
192    64     
-144   272    
-272   -624   
0      96     
272    640    
-208   -192   
16     -80    
80     256    
-144   80     
-208   -144   
96     352    
-384   -16    
368    208    
-272   240    
112    -128   
48     80     
-32    48     
112    0      
-48    160    
-272   -64    
-144   -112   
-96    448    
-544   -624   
48     -48    
-272   144    
48     128    
-736   -64    
-80    32     
-96    -32    
0      -240   
176    96     
32     320    
-160   -144   
16     336    
48     -416   
-80    -48    
-272   416    
-80    -384   
80     176    
-320   368    
112    -272   
-768   64     
-192   -144   
0      -352   
448    704    
-432   48     
80     -128   
64     144    
0      48     
64     448    
-144   32     
-16    48     
304    80     
-144   80     
-80    -64    
48     48     
-160   -112   
208    304    
144    576    
-48    384    
-176   -320   
144    -272   
128    -64    
-256   -96    
0      80     
112    -176   
-80    240    
128    224    
-224   -432   
-208   16     
128    -48    
-432   112    
128    672    
-16    48     
64     -256   
-80    -16    
-64    160    
208    176    
-320   -48    
224    -128   
-304   48     
224    -16    
32     512    
-48    -64    
-256   -528   
128    0      
-208   48     
240    192    
128    32     
-320   48     
112    -32    
-32    128    
-16    64     
16     96     
0      64     
-16    0      
-64    16     
-96    -32    
208    -16    
-160   -64    
16     -144   
176    112    
112    352    
-128   32     
-144   -912   
304    288    
-16    800    
-16    -352   
-32    -352   
-16    160    
-160   -96    
64     192    
64     480    
-80    160    
-208   -288   
160    176    
-368   -96    
144    240    
-96    64     
0      368    
80     -256   
-64    -32    
-96    256    
16     -80    
-16    48     
0      32     
80     -128   
-128   -32    
384    352    
-448   -160   
112    -176   
64     160    
64     320    
80     368    
64     -32    
-32    -176   
-48    192    
-16    64     
160    32     
96     -48    
-112   -16    
112    -128   
-32    -448   
-64    64     
112    112    
-32    80     
224    256    
-128   224    
48     80     
-144   -528   
-128   -320   
224    -128   
-112   256    
80     80     
-160   128    
48     224    
-80    224    
16     160    
-64    -32    
80     128    
-176   -736   
224    48     
96     48     
-112   112    
32     80     
-128   48     
16     80     
-32    288    
32     112    
-32    96     
-112   -112   
48     -32    
272    96     
-240   16     
192    -224   
-160   -1936  
192    80     
-176   -128   
304    -80    
-32    16     
80     192    
-32    -320   
-32    240    
144    176    
-368   112    
176    80     
32     64     
64     112    
-32    64     
96     64     
-160   -672   
80     -48    
144    64     
-208   384    
336    192    
-240   80     
192    -112   
64     128    
96     112    
-128   176    
-64    0      
-112   160    
-288   48     
-176   112    
160    304    
112    80     
112    176    
112    -144   
-144   32     
176    -16    
128    256    
-96    256    
48     112    
-112   -32    
16     16     
-80    0      
-64    -32    
-224   -176   
-80    16     
-80    368    
-160   -256   
-64    240    
-96    -1168  
-128   -48    
160    32     
80     192    
32     144    
-48    320    
240    256    
-64    128    
-192   -48    
240    176    
-96    144    
-112   80     
112    32     
176    -272   
64     32     
96     -112   
48     160    
80     -848   
112    112    
304    96     
-160   112    
48     -48    
224    80     
0      -32    
112    96     
32     96     
240    -16    
-128   32     
352    160    
-160   128    
64     -272   
-32    80     
208    -1712  
160    128    
-176   -1376  
32     112    
128    64     
-128   -112   
224    32     
192    144    
-32    176    
160    -96    
-16    0      
96     -336   
-80    -32    
144    -288   
224    128    
-64    -944   
-16    64     
-16    16     
112    80     
48     128    
-16    80     
32     112    
160    224    
-80    144    
208    64     
-144   80     
32     80     
304    96     
-64    -16    
192    48     
-48    -16    
80     64     
16     0      
-32    32     
112    -32    
0      144    
320    128    
-192   -16    
176    144    
16     -96    
96     128    
176    32     
224    160    
-96    -80    
128    128    
-192   -160   
240    0      
-32    -176   
192    -1088  
-96    -16    
144    -480   
96     -288   
256    384    
-96    -144   
-48    -384   
112    -912   
224    -224   
0      144    
64     -128   
0      144    
80     -160   
128    -816   
192    192    
-208   16     
112    384    
-16    -240   
144    -224   
32     -224   
96     -176   
80     480    
32     -640   
-32    80     
336    -240   
-176   144    
128    240    
48     -48    
-64    -288   
64     256    
144    208    
-32    320    
-256   -160   
-32    -272   
-1040  0      
128    -272   
144    -80    
-48    144    
96     96     
-128   -976   
-16    -176   
64     16     
0      112    
16     -112   
112    80     
-64    -352   
16     -128   
-192   -112   
32     128    
-384   272    
96     -528   
64     352    
0      -304   
128    -464   
48     400    
-80    64     
304    -96    
-112   -16    
-32    -224   
32     -64    
-32    -16    
-32    -144   
0      80     
32     368    
-96    -512   
-16    -48    
336    544    
-432   -368   
208    -640   
64     160    
96     -48    
96     -96    
-224   -80    
384    208    
-464   304    
320    -352   
80     480    
128    -320   
384    352    
-336   0      
208    -208   
-448   32     
16     -96    
192    80     
-112   -96    
-32    -48    
-224   -832   
320    48     
16     -1328  
112    256    
-160   96     
-48    -96    
592    368    
-416   32     
-480   -448   
-272   -416   
-32    -96    
-144   -128   
-128   -544   
400    64     
224    416    
-48    -208   
-32    0      
320    -816   
-64    272    
288    -80    
-48    -176   
192    112    
48     64     
-128   304    
512    -144   
-96    128    
176    48     
464    272    
-384   272    
320    -176   
-272   -816   
432    -16    
-64    288    
320    -448   
-96    176    
-32    -288   
-160   -160   
-64    272    
-160   -48    
128    -96    
-576   -624   
240    112    
-176   208    
256    -496   
112    704    
-16    -240   
144    16     
-96    -208   
176    16     
-288   -256   
560    96     
-64    368    
16     -304   
-96    112    
176    -96    
-64    0      
32     112    
288    144    
-16    -32    
144    80     
-384   -144   
192    32     
-80    0      
-816   32     
0      48     
-544   -80    
-160   -128   
-144   224    
144    -416   
-48    -336   
672    848    
-784   944    
160    -928   
48     384    
16     304    
-176   -800   
-336   304    
112    -896   
-48    448    
256    256    
-880   -480   
-128   32     
-112   -176   
-288   224    
192    16     
-96    80     
16     -96    
128    688    
224    -240   
-160   -160   
80     -192   
-64    -272   
48     288    
-80    -16    
-64    144    
48     400    
-16    -256   
-112   80     
16     0      
-544   64     
-192   -32    
-128   -112   
80     112    
-96    -32    
48     96     
368    512    
-496   64     
128    -64    
80     -144   
-320   -576   
176    112    
464    608    
-432   -144   
96     48     
-672   -256   
-160   -352   
-64    -80    
112    336    
176    -176   
-272   -352   
256    0      
-352   48     
-16    32     
-32    0      
0      16     
96     128    
208    48     
-256   -112   
-16    80     
-176   -144   
-32    112    
-352   -112   
96     -32    
-64    -208   
144    80     
-32    0      
80     112    
144    208    
-144   64     
16     160    
-112   64     
-144   32     
112    0      
48     176    
-112   128    
176    240    
-224   -32    
80     128    
16     -144   
32     112    
-32    -192   
80     96     
80     48     
-256   -16    
208    48     
-80    48     
-32    64     
-400   16     
368    -96    
-224   0      
112    224    
-496   -32    
-16    128    
96     208    
16     432    
96     192    
0      16     
-16    -128   
16     0      
32     96     
-16    32     
-32    16     
0      32     
0      -48    
-176   -96    
112    64     
-176   -80    
32     96     
208    112    
80     128    
-16    240    
192    96     
-160   -80    
192    -208   
112    32     
32     -64    
160    -96    
-352   -144   
224    112    
-240   -32    
80     96     
-16    -16    
-80    128    
64     64     
-224   -96    
320    208    
-240   -32    
192    112    
-48    272    
16     496    
48     1184   
112    576    
-368   -256   
-144   -160   
0      -48    
272    432    
-160   -80    
80     -144   
192    -208   
240    16     
304    128    
64     80     
240    -32    
-32    -96    
64     -32    
-144   16     
176    256    
-128   128    
64     -48    
-400   -240   
32     -144   
-80    112    
128    64     
80     -16    
64     32     
192    112    
-96    -64    
-32    96     
304    160    
-48    160    
-624   128    
256    64     
-16    32     
224    176    
-224   16     
32     144    
112    80     
-176   64     
176    112    
96     112    
64     80     
96     48     
-64    96     
128    64     
16     144    
-80    160    
240    32     
-224   -16    
32     96     
-192   -64    
192    16     
32     96     
48     32     
96     48     
-144   16     
224    96     
32     80     
-32    16     
432    464    
-512   272    
0      -64    
48     128    
48     -32    
-48    96     
-128   -240   
240    -256   
-144   32     
32     0      
96     96     
160    128    
16     144    
-16    96     
-32    96     
16     64     
32     96     
64     112    
128    64     
-176   -32    
32     0      
112    112    
-16    -128   
48     96     
-80    80     
80     80     
128    112    
-16    32     
128    112    
0      32     
-16    0      
80     48     
-80    32     
256    96     
-208   -48    
192    144    
-144   256    
-32    -208   
304    192    
-272   64     
208    48     
-112   112    
96     -80    
-224   -192   
128    -320   
-80    0      
336    368    
-304   80     
304    112    
-80    -48    
-176   -512   
-32    -320   
-32    -496   
32     -64    
96     -2176  
-32    112    
-16    80     
80     -192   
-112   -64    
128    0      
-48    160    
128    288    
-32    -144   
32     128    
16     64     
0      240    
-16    -16    
160    -176   
112    384    
-80    -848   
-48    144    
304    400    
-368   -592   
400    96     
-128   128    
-48    -736   
-112   32     
144    -96    
64     176    
160    480    
16     0      
128    -144   
64     -48    
64     -80    
48     -752   
192    192    
32     -1216  
32     96     
176    -32    
96     208    
-80    208    
112    32     
64     -80    
16     112    
80     80     
16     -64    
96     64     
32     -96    
128    304    
48     -64    
-240   -400   
16     -800   
112    -32    
112    80     
112    144    
0      96     
192    352    
64     240    
128    144    
-48    -32    
16     64     
112    96     
176    -144   
160    176    
64     16     
16     256    
384    0      
-96    -32    
432    160    
-160   272    
64     208    
160    544    
-16    48     
-32    -1072  
128    128    
96     -160   
-32    160    
80     -112   
272    -96    
-144   -80    
288    176    
32     64     
-32    224    
-112   160    
176    160    
-32    96     
160    96     
-160   16     
224    64     
-64    448    
224    -192   
-112   -208   
-144   -272   
320    -176   
80     -416   
-128   480    
528    -80    
-96    -800   
-64    -448   
144    -1616  
224    352    
-32    -688   
32     -240   
272    64     
-32    112    
32     -304   
-160   -1808  
128    -112   
-32    144    
-112   160    
128    240    
-112   48     
-48    0      
-176   48     
144    -144   
-208   272    
-96    -352   
208    -352   
-16    336    
304    -16    
-240   384    
128    -432   
-80    -64    
-80    -224   
144    -112   
-176   -528   
128    208    
-272   -448   
208    304    
-832   -1424  
784    176    
-480   816    
192    -416   
-544   -96    
144    -64    
-64    160    
128    240    
64     -48    
80     288    
-80    0      
224    -400   
-208   -368   
112    -16    
80     448    
80     -256   
-112   -672   
-16    16     
224    432    
-128   128    
48     48     
96     32     
-80    -224   
240    16     
-80    -608   
192    -64    
32     -320   
224    528    
112    -32    
-128   -272   
336    448    
64     400    
-224   -64    
32     -112   
-16    -176   
32     -240   
-1152  288    
-144   144    
160    112    
80     -48    
32     144    
-80    -944   
-16    32     
208    -176   
-96    176    
16     0      
-112   32     
16     288    
-176   -256   
16     -144   
80     -128   
-640   -96    
0      -64    
192    16     
224    64     
-160   144    
96     -320   
208    368    
-96    -1024  
208    448    
-304   208    
64     32     
-32    144    
80     -48    
-208   -304   
-80    -208   
208    128    
-176   64     
-112   192    
-240   -240   
-48    64     
112    -224   
16     128    
32     -1392  
-32    48     
224    0      
-192   64     
-544   0      
-16    -16    
-288   -96    
192    224    
-128   -80    
-80    -16    
-464   -128   
112    -304   
48     96     
272    -272   
-272   400    
16     -656   
-192   -240   
-208   -112   
80     112    
-144   -32    
64     16     
-80    -16    
112    112    
-128   32     
-80    -304   
96     -32    
160    -16    
-112   112    
160    -64    
-64    96     
0      48     
-608   0      
32     48     
32     -48    
-64    -96    
192    224    
32     160    
-160   -96    
0      -64    
96     -48    
32     0      
-304   -32    
-48    0      
-576   -192   
256    336    
-48    -80    
-544   -80    
-128   0      
160    96     
16     48     
-1424  -160   
-240   -96    
0      -304   
96     -96    
320    80     
-240   32     
-592   -240   
-80    -224   
-160   -416   
-16    -64    
-64    96     
256    96     
-80    -48    
-48    224    
48     160    
-720   -112   
16     16     
-80    48     
96     16     
-240   -96    
112    48     
-240   -240   
256    208    
-16    -176   
-32    16     
16     -32    
0      64     
-144   64     
-80    16     
80     128    
-112   96     
-16    64     
-1120  64     
272    144    
0      32     
112    64     
-208   128    
400    -16    
-192   0      
256    48     
-240   -16    
-80    -128   
-144   -64    
160    112    
-208   -176   
32     -192   
-48    16     
-240   288    
96     96     
-208   -144   
192    128    
-160   -192   
208    -48    
-48    48     
-16    -32    
-16    32     
-112   96     
128    32     
-128   128    
-16    32     
-80    16     
-336   64     
-80    -96    
0      0      
-560   -32    
144    64     
-384   -32    
48     0      
-128   64     
96     112    
0      64     
-16    16     
16     48     
-64    -48    
-16    48     
-128   32     
-160   48     
224    0      
-112   128    
-288   0      
-16    80     
0      -256   
-16    80     
-48    80     
-224   -32    
48     16     
32     -16    
-64    48     
-112   -48    
16     -32    
-208   -48    
160    112    
-96    -16    
64     112    
-576   -208   
160    -32    
-16    48     
-160   80     
-16    64     
-32    32     
-64    -160   
16     0      
-144   0      
-16    48     
128    128    
-48    32     
-128   64     
16     16     
144    272    
-400   208    
-64    96     
192    128    
-208   64     
64     48     
-112   16     
48     80     
32     144    
0      64     
48     112    
0      80     
-160   16     
32     272    
32     112    
176    496    
-496   -704   
176    -256   
240    1216   
-272   -64    
32     -496   
48     480    
96     -128   
-80    64     
64     48     
-128   32     
0      0      
-96    32     
48     64     
-128   0      
64     112    
-176   -16    
-144   -32    
288    912    
-176   -208   
112    -32    
-96    592    
64     -224   
0      96     
-96    32     
32     -16    
-144   80     
64     160    
-64    192    
-160   -224   
192    128    
-208   -128   
304    -192   
-64    752    
192    240    
64     96     
-80    160    
176    96     
-112   0      
176    80     
-128   96     
208    368    
-192   80     
80     -240   
-112   -80    
32     16     
48     16     
160    96     
112    48     
0      464    
16     0      
16     160    
48     112    
-160   -48    
176    64     
-160   48     
240    128    
-240   32     
128    96     
-144   -80    
336    240    
-320   32     
352    80     
-96    96     
208    0      
-80    96     
128    80     
-32    80     
80     80     
624    480    
-464   400    
16     176    
-128   -80    
240    112    
96     80     
32     -400   
32     -32    
48     -144   
-48    32     
112    256    
288    336    
-176   480    
208    240    
-128   128    
-96    -80    
96     -64    
-32    -112   
400    -160   
-80    16     
112    -48    
208    -432   
48     112    
192    144    
352    32     
-16    352    
-64    144    
-96    48     
128    32     
-192   64     
224    112    
64     48     
208    480    
-16    144    
0      -128   
-80    -112   
144    -448   
144    96     
-96    -32    
-16    -112   
576    32     
-240   272    
224    192    
-128   0      
0      128    
96     144    
16     0      
-160   0      
-128   -240   
304    336    
480    784    
-240   176    
16     -256   
64     -592   
64     -32    
-32    32     
48     -64    
32     -48    
-192   -224   
272    -320   
-80    48     
-32    -640   
-272   -416   
256    -176   
-48    320    
32     288    
32     -400   
80     -208   
0      -400   
128    336    
-80    272    
432    528    
48     768    
112    560    
-80    0      
256    336    
0      48     
-32    -32    
64     320    
128    80     
-80    112    
-144   -128   
176    -96    
-16    -352   
64     48     
-64    -720   
272    -16    
-192   32     
128    96     
-144   32     
144    128    
-96    96     
352    352    
-160   256    
32     -16    
368    160    
-48    -16    
-80    32     
-32    -368   
176    -128   
192    -304   
32     48     
112    32     
-64    96     
-16    16     
64     0      
0      208    
304    112    
-320   112    
64     -736   
160    416    
-336   -16    
64     80     
144    -48    
0      80     
160    -160   
0      16     
112    16     
96     -16    
0      -64    
160    208    
-224   144    
192    -48    
-80    64     
208    0      
-64    64     
112    -32    
176    80     
48     -64    
112    32     
-32    -96    
432    224    
-416   112    
304    352    
-128   -48    
48     -1632  
144    -272   
-64    -176   
256    -16    
0      64     
-64    -256   
320    -304   
0      320    
96     -64    
-144   112    
272    16     
-64    -128   
112    64     
-48    -656   
320    96     
-64    -64    
16     -160   
144    -32    
-80    -80    
-112   -288   
32     -912   
160    -16    
-48    128    
32     16     
48     16     
32     -96    
208    -160   
-80    32     
96     -272   
96     48     
-80    -48    
48     80     
192    176    
48     -160   
16     -208   
208    -16    
-32    -80    
64     -128   
64     32     
80     80     
16     0      
0      0      
96     16     
-32    80     
256    -48    
-96    -32    
-32    -144   
304    -128   
48     -208   
192    48     
48     -128   
-64    80     
64     -240   
32     -144   
-80    -704   
32     -384   
-80    -144   
240    160    
-32    160    
80     48     
-128   -48    
-48    -128   
-224   -176   
48     32     
112    48     
32     128    
96     96     
48     -48    
-80    -144   
32     96     
160    80     
80     0      
-64    80     
-96    0      
160    64     
-224   32     
-64    0      
-288   -16    
224    80     
-1216  -48    
160    -64    
48     64     
0      -192   
16     -32    
128    -240   
192    48     
64     -48    
96     80     
-64    -16    
112    -32    
-112   -128   
176    -432   
0      -32    
0      -16    
-208   -64    
240    160    
-384   48     
128    0      
-80    64     
112    -560   
16     128    
-48    -192   
0      -128   
144    96     
-112   -112   
128    224    
224    0      
-320   -96    
112    -64    
-96    -16    
16     240    
-144   -32    
0      -352   
112    80     
-32    -832   
128    64     
80     -160   
112    64     
-192   16     
160    -32    
-80    -80    
64     -16    
-80    32     
288    192    
32     96     
-128   16     
112    -16    
96     -96    
-64    32     
192    -48    
-96    144    
-112   -32    
0      -48    
-96    48     
-240   -208   
96     -112   
48     48     
192    64     
-32    112    
-48    -16    
240    80     
-976   48     
-96    -208   
48     -48    
-384   -112   
80     0      
-16    -80    
-256   128    
32     -80    
-80    -16    
96     -176   
32     144    
-192   32     
-144   -208   
-64    -48    
-224   -80    
-48    160    
-176   -32    
0      112    
-160   -208   
-112   96     
-32    224    
192    304    
-304   96     
16     16     
-64    32     
-528   64     
-192   32     
0      64     
16     304    
0      32     
-96    224    
-192   112    
64     192    
-240   16     
256    432    
-208   400    
0      -480   
0      336    
-96    288    
-112   0      
-32    0      
-64    128    
-64    272    
64     -304   
-32    112    
64     64     
-80    -96    
64     80     
32     192    
32     -48    
-96    304    
-128   -32    
192    256    
-544   -800   
144    -192   
0      368    
-128   96     
-800   -64    
400    0      
-464   -128   
112    48     
-48    -144   
64     96     
64     80     
0      80     
-32    16     
-144   32     
-16    80     
192    64     
-128   144    
-80    176    
64     16     
-448   -176   
144    144    
-80    -144   
80     64     
0      -80    
-64    128    
192    496    
-272   -16    
-16    -240   
0      160    
80     -16    
-32    16     
64     32     
-256   32     
-64    0      
-464   -64    
96     112    
-1200  0      
80     112    
0      -256   
-96    64     
-32    80     
-144   -48    
16     80     
80     48     
0      112    
-96    16     
-48    0      
-128   -16    
-16    -448   
-544   -448   
416    -144   
-976   -480   
16     -416   
96     64     
-272   112    
64     48     
-48    128    
64     16     
-64    -96    
-32    -304   
0      112    
48     64     
96     64     
-16    144    
0      0      
-48    96     
-176   -16    
-32    80     
-32    -64    
48     -112   
64     352    
96     112    
-112   48     
224    128    
-112   96     
-80    -48    
96     96     
-64    96     
-208   -48    
304    432    
-128   528    
-80    -160   
0      -160   
16     -32    
16     592    
224    528    
-288   -176   
-176   -224   
-208   96     
32     -288   
-48    -64    
32     16     
-272   -64    
160    -16    
-448   -336   
176    528    
0      -592   
-48    144    
224    160    
16     144    
112    848    
144    -448   
-96    -416   
272    384    
64     -144   
0      -144   
80     384    
160    480    
208    240    
-176   -336   
96     -64    
80     48     
-128   -32    
16     128    
64     176    
-144   -64    
-16    -32    
176    144    
64     448    
96     208    
-64    80     
-16    144    
-96    -32    
96     32     
-352   -160   
368    192    
-400   112    
96     112    
-16    192    
-128   -112   
128    -128   
48     144    
112    96     
-144   -208   
32     64     
144    112    
-144   0      
64     192    
496    432    
-736   112    
48     48     
96     48     
192    144    
16     160    
-96    64     
128    32     
0      -80    
160    16     
96     -208   
-48    48     
-96    32     
32     16     
-48    64     
112    80     
-256   144    
96     112    
48     48     
-48    0      
48     48     
32     64     
-32    64     
-32    32     
96     32     
32     48     
-32    64     
16     16     
0      96     
-96    -96    
272    272    
-256   144    
96     -192   
16     144    
-16    16     
-32    -64    
96     64     
160    560    
-112   -32    
32     48     
-16    -80    
-192   -64    
0      48     
32     48     
0      -96    
160    144    
16     144    
-96    -992   
144    32     
64     160    
96     64     
0      96     
48     96     
96     0      
-16    64     
80     80     
48     80     
208    144    
-144   208    
112    128    
192    224    
-448   80     
128    -560   
96     144    
32     160    
96     48     
-64    16     
96     128    
352    368    
-608   80     
288    64     
-128   112    
112    16     
0      128    
-80    -112   
128    -256   
0      96     
48     -272   
64     64     
-64    -416   
112    64     
-80    336    
144    32     
-96    -272   
96     128    
128    0      
-256   64     
32     -16    
48     144    
-256   -272   
208    -96    
-48    16     
16     -48    
-32    16     
32     -560   
32     96     
160    -2336  
64     80     
-48    -32    
96     48     
0      64     
16     96     
0      48     
48     240    
64     192    
128    96     
-144   80     
256    336    
64     112    
-416   -1152  
416    16     
0      -176   
-160   32     
112    96     
-16    96     
48     80     
240    240    
-128   176    
-112   -128   
96     176    
176    -176   
-256   80     
192    160    
-256   96     
192    -192   
128    96     
16     -112   
-32    -16    
-48    32     
128    -48    
176    32     
16     112    
112    48     
-96    -336   
352    64     
32     -64    
-64    192    
-48    -176   
-128   64     
320    -144   
-32    160    
64     -288   
-64    0      
-48    16     
208    112    
-80    176    
48     96     
-16    -32    
96     -240   
-144   128    
272    -176   
-64    128    
208    -64    
-112   80     
96     -192   
48     -64    
16     -48    
64     128    
80     -32    
96     -336   
32     112    
-1792  -144   
112    -1840  
0      -176   
112    -416   
-144   0      
0      -752   
64     -32    
-16    144    
272    688    
384    688    
-336   -224   
208    -208   
-16    112    
192    96     
-176   32     
-368   -16    
0      -128   
128    128    
32     -16    
-144   -48    
368    -560   
-208   -320   
128    352    
-192   48     
-48    80     
112    208    
-48    -576   
32     -176   
128    -144   
48     192    
-240   64     
176    -64    
-16    0      
-112   -144   
192    144    
-336   -96    
256    16     
-16    -432   
0      -128   
-144   -576   
528    -16    
192    -96    
-48    48     
-64    -96    
112    -112   
-272   -80    
288    -112   
-608   128    
512    352    
-112   480    
-32    -176   
-16    -144   
0      -320   
48     -288   
192    -1728  
32     0      
208    -96    
176    176    
16     64     
112    64     
-400   -240   
160    48     
-448   48     
-192   -224   
288    -96    
480    896    
-592   -1136  
144    -240   
80     112    
48     -528   
192    240    
-144   48     
208    -192   
-176   192    
-96    -672   
-96    -224   
272    224    
-160   384    
0      -240   
-48    48     
96     64     
-560   -80    
80     -96    
112    528    
160    -480   
-128   -144   
160    208    
176    -368   
-160   96     
128    144    
0      16     
-16    144    
-32    352    
160    32     
-704   16     
256    -80    
-528   240    
176    432    
80     256    
80     -272   
-240   112    
272    -496   
-112   -64    
0      48     
0      -32    
-80    64     
160    -16    
-224   16     
144    -16    
-176   16     
16     48     
64     32     
-144   -208   
208    -160   
48     -80    
80     -80    
48     -16    
96     48     
112    48     
-48    192    
-48    160    
16     -96    
-224   -224   
80     -272   
32     -64    
32     0      
-112   -64    
112    -32    
80     112    
-144   -320   
160    -16    
80     128    
0      16     
-224   0      
96     -32    
-128   144    
112    32     
-192   80     
96     80     
-176   -144   
128    -208   
-608   -80    
-512   -336   
-48    80     
-192   -80    
32     -32    
-128   720    
-288   672    
-64    336    
-496   528    
-80    96     
16     -96    
-144   0      
96     -128   
-80    -64    
208    96     
-208   64     
-432   -64    
0      32     
-320   -144   
-320   -96    
-48    96     
-128   0      
-64    16     
368    624    
-48    720    
-352   352    
-224   -896   
160    320    
32     384    
-192   -384   
272    672    
-192   -224   
96     176    
176    912    
16     64     
-208   -352   
0      -48    
-112   64     
-64    -128   
-144   112    
-352   96     
-48    112    
-240   -16    
80     128    
48     448    
-48    -96    
-32    -80    
-16    112    
64     80     
16     144    
64     0      
0      -96    
-32    -320   
0      -32    
-48    -80    
-176   -432   
336    -528   
-240   64     
256    272    
-352   64     
96     288    
-16    -16    
-96    112    
-64    -176   
-288   -128   
384    -48    
-384   48     
304    80     
-80    80     
208    208    
-368   64     
80     96     
-288   -192   
-176   -224   
512    -112   
-256   224    
432    -80    
-192   64     
208    96     
-208   -64    
0      16     
-96    -128   
416    144    
-432   -32    
352    -64    
-320   -32    
240    16     
-608   -112   
48     64     
-976   48     
48     32     
-144   -64    
384    32     
-144   128    
128    -160   
-336   128    
304    176    
-160   112    
64     32     
16     64     
16     64     
-176   160    
-80    -48    
144    208    
-96    16     
-16    224    
368    96     
-128   128    
64     64     
-272   -32    
176    -80    
-48    -32    
48     96     
-176   -16    
-16    176    
-160   -16    
48     144    
96     112    
64     96     
-240   -80    
0      -32    
80     80     
-112   0      
-64    -16    
-16    -48    
-160   48     
-80    -16    
-48    16     
32     80     
-16    128    
304    176    
-208   176    
-112   96     
0      48     
16     -32    
0      64     
80     96     
-32    64     
192    48     
-48    -16    
64     -16    
288    272    
-176   48     
-48    112    
112    112    
-112   -96    
-144   80     
32     -32    
-112   112    
224    48     
-32    32     
256    128    
-80    64     
288    256    
-320   48     
160    32     
-112   96     
80     32     
-64    48     
-48    48     
-176   -48    
112    128    
0      32     
-48    -16    
-128   96     
416    16     
-288   112    
-16    -64    
144    272    
-256   240    
96     208    
192    96     
-144   16     
-16    -64    
96     16     
-80    -80    
96     144    
-240   -48    
112    48     
-176   -32    
256    16     
-96    -48    
160    112    
-224   -64    
208    256    
-80    -16    
-64    160    
64     -64    
-160   64     
304    416    
-336   224    
16     160    
64     -32    
48     64     
32     192    
112    48     
112    80     
0      32     
112    48     
16     -16    
-48    16     
-16    80     
-32    32     
224    -64    
-64    128    
0      32     
32     64     
80     128    
272    224    
-208   192    
208    96     
-176   96     
0      32     
-96    -48    
128    -32    
48     80     
-160   -96    
256    0      
48     32     
-48    192    
-64    -144   
-224   48     
448    128    
0      -1040  
80     32     
80     112    
0      128    
80     112    
64     16     
-128   -32    
304    80     
160    272    
-80    240    
-160   0      
144    -32    
112    80     
0      0      
64     96     
16     -368   
16     176    
128    176    
64     32     
-64    96     
192    96     
80     400    
-80    -416   
-32    -560   
96     112    
192    -176   
32     -384   
80     -128   
144    -64    
176    336    
-16    -128   
112    128    
-48    -1024  
64     96     
-48    48     
80     -96    
48     -112   
-16    0      
96     32     
144    128    
320    816    
448    80     
-128   -16    
80     -96    
-64    16     
272    -544   
80     -16    
32     -496   
400    320    
-16    208    
64     96     
160    704    
416    368    
-64    128    
-96    80     
48     -192   
112    144    
320    288    
-128   96     
176    240    
256    96     
80     96     
0      -224   
-96    0      
160    -672   
-64    -48    
208    64     
-128   -96    
-16    -208   
-32    -80    
144    384    
-16    -208   
80     64     
32     32     
272    464    
-288   -592   
192    352    
48     144    
-240   -32    
368    -416   
0      464    
112    48     
-32    -32    
-48    48     
-16    64     
-80    240    
-128   -400   
320    -48    
-48    96     
-144   -64    
288    -304   
112    288    
-96    -192   
112    -48    
384    112    
-256   160    
192    32     
-144   80     
16     -32    
96     176    
192    96     
-112   -80    
80     48     
64     64     
16     128    
96     -144   
48     176    
160    0      
160    672    
-112   48     
-144   -480   
224    -176   
64     144    
96     160    
64     -384   
288    -1712  
208    368    
112    544    
240    -176   
-368   48     
160    -288   
-16    160    
0      -240   
-16    -256   
32     -112   
80     -592   
-16    -176   
-16    -272   
96     16     
-1712  320    
176    0      
-16    -128   
-16    -560   
-48    -16    
240    32     
-144   -128   
112    64     
0      -272   
80     -224   
128    96     
80     -16    
48     96     
48     -16    
80     96     
-416   -160   
192    -16    
0      -48    
96     128    
16     -32    
64     -800   
0      -272   
16     -912   
64     0      
224    320    
80     512    
144    272    
-32    112    
-272   -304   
512    16     
-416   160    
208    80     
-48    -48    
48     -128   
64     -176   
0      -432   
224    -320   
80     -528   
144    -128   
128    304    
-112   208    
304    -96    
-96    416    
208    -192   
-80    -32    
-112   -96    
192    -32    
-720   -432   
432    464    
288    928    
-416   -576   
192    -192   
64     32     
-128   -224   
208    -1632  
0      80     
32     80     
16     64     
304    544    
-208   -224   
-96    96     
144    32     
-96    -80    
80     -80    
-288   48     
128    176    
-160   -112   
32     -608   
144    96     
32     -464   
32     -224   
-192   -656   
192    -112   
-144   -160   
128    32     
-224   336    
64     -144   
-208   32     
-64    -64    
-752   -80    
32     -192   
-16    -80    
96     -288   
-48    -48    
176    -448   
112    160    
64     0      
64     16     
-64    -160   
-288   176    
-32    -208   
-80    -64    
-112   32     
96     32     
-64    -112   
0      80     
112    160    
-64    80     
48     -144   
144    -224   
64     336    
160    -176   
-32    -160   
16     -128   
32     32     
-128   128    
64     64     
-208   -80    
0      -32    
-352   -400   
240    -32    
48     112    
144    -96    
-80    80     
64     -160   
96     48     
128    -16    
32     32     
16     0      
-80    96     
32     0      
128    0      
-112   -96    
176    16     
-96    -32    
144    -64    
-464   80     
48     -208   
144    304    
-32    -112   
64     48     
-240   64     
-768   0      
32     176    
336    128    
-240   256    
224    368    
-192   -32    
64     -432   
208    -160   
416    -544   
-224   -48    
-496   16     
48     -16    
-240   16     
-176   16     
0      224    
-720   -48    
-16    80     
-816   32     
-160   192    
48     64     
-352   160    
128    128    
-160   288    
-48    96     
-112   112    
0      -112   
-16    48     
-112   -192   
32     -96    
-16    80     
-80    16     
-144   0      
-544   0      
32     112    
-1376  -128   
-160   -224   
320    -336   
64     64     
-16    -112   
0      80     
48     -80    
-112   64     
224    128    
-240   -32    
32     176    
112    -80    
-192   -16    
176    64     
-224   -16    
-32    0      
32     -16    
-496   0      
288    272    
-368   -16    
80     0      
-224   64     
32     112    
144    96     
-208   -48    
192    80     
-64    80     
-80    48     
-160   -64    
112    192    
-304   -32    
112    -144   
-32    32     
272    352    
-48    -128   
-96    -48    
160    -176   
0      80     
64     112    
80     80     
-96    16     
0      -192   
96     176    
-128   64     
-32    80     
-48    48     
-112   -80    
-160   -128   
-16    128    
112    -48    
-144   -16    
32     -96    
352    112    
-128   -64    
80     96     
16     48     
-160   64     
128    112    
-48    240    
-16    144    
-96    0      
-64    -144   
-80    -144   
64     144    
-272   0      
32     96     
64     96     
16     48     
48     64     
16     64     
-32    -80    
-16    0      
96     16     
-32    80     
-32    16     
-144   16     
80     80     
-48    32     
-96    144    
-384   128    
128    160    
-80    -48    
-96    -48    
16     64     
64     0      
32     64     
96     160    
-112   208    
32     320    
-336   48     
144    -16    
32     80     
-240   -112   
96     -64    
-240   -384   
-128   -400   
304    80     
-160   256    
304    400    
-176   336    
-48    -192   
-128   -96    
48     -64    
-64    96     
96     80     
32     176    
-48    256    
32     32     
-176   -160   
288    304    
-336   -64    
96     -608   
-48    576    
16     80     
-32    0      
48     208    
-80    -64    
96     96     
-48    32     
16     96     
-32    -48    
-16    16     
-272   -112   
256    -240   
-96    224    
96     192    
-80    -192   
-16    368    
-192   -144   
256    432    
-128   -32    
-192   -192   
160    304    
-112   16     
48     96     
-176   -128   
224    240    
-144   16     
-112   -176   
96     352    
-32    192    
-80    48     
16     80     
-16    -112   
16     16     
240    -144   
224    784    
-128   -128   
240    -384   
96     224    
256    208    
-160   272    
224    -144   
32     144    
-176   16     
0      160    
32     -48    
496    16     
-48    128    
112    224    
240    320    
-352   272    
16     -32    
112    0      
112    64     
-544   -352   
160    -816   
-288   -448   
464    -240   
-80    656    
-64    80     
256    -464   
-112   480    
96     -144   
32     -112   
-48    320    
-32    -80    
64     272    
-288   304    
-160   -512   
192    -112   
288    800    
-368   -208   
208    192    
-48    208    
-112   48     
-256   -352   
112    -208   
272    672    
-432   -256   
304    -272   
0      448    
416    192    
-416   -368   
208    112    
48     -64    
-16    80     
32     48     
-32    -288   
-48    -48    
-80    272    
336    80     
-416   -32    
208    96     
-16    176    
96     160    
32     80     
64     -80    
-96    -176   
288    304    
-96    464    
32     -464   
96     112    
-160   -416   
112    -224   
48     112    
48     224    
-48    272    
32     -480   
224    -16    
192    1264   
-272   -528   
128    48     
32     -144   
-112   -32    
256    384    
-160   128    
64     -528   
-128   -1168  
528    336    
112    1104   
128    848    
0      -208   
-192   -464   
-160   -176   
352    48     
-48    0      
0      96     
48     80     
80     144    
48     96     
48     -144   
48     128    
48     -48    
64     96     
-96    -352   
256    208    
128    384    
-256   208    
-64    -336   
208    144    
-48    160    
112    96     
-32    64     
64     -144   
-128   -496   
288    -16    
96     368    
-80    -112   
64     448    
-208   -464   
112    16     
16     -352   
-80    80     
-96    -112   
288    96     
-176   384    
-128   224    
32     224    
64     -240   
192    304    
-128   -336   
80     0      
32     -640   
112    0      
16     -176   
208    576    
336    400    
-160   240    
240    368    
-96    16     
112    0      
0      16     
224    144    
-48    112    
192    336    
176    96     
-160   64     
496    112    
-352   320    
-16    80     
0      144    
64     -368   
96     96     
-32    128    
256    144    
-144   -160   
144    112    
144    160    
96     -256   
192    96     
0      -160   
240    80     
48     -272   
64     48     
112    -16    
16     144    
144    -640   
-256   112    
-96    -80    
240    -416   
-144   64     
-368   32     
-144   -208   
144    -144   
16     -992   
176    -160   
96     112    
64     -208   
400    128    
-208   -80    
160    48     
-144   -576   
176    -992   
-32    96     
-16    -128   
160    144    
-1312  -80    
208    64     
144    64     
112    -656   
-48    64     
64     -624   
64     -32    
144    -80    
112    -144   
160    240    
64     -16    
0      64     
208    864    
384    512    
-96    -208   
-64    -240   
144    -528   
80     -368   
192    -112   
160    240    
0      -416   
-32    -256   
160    -2656  
144    144    
16     176    
-32    -16    
-16    -128   
-176   16     
-16    -128   
-176   -288   
-400   64     
-80    -96    
64     96     
0      -96    
32     -48    
80     -160   
32     0      
48     -80    
160    80     
-464   48     
464    144    
80     0      
-48    384    
-32    128    
96     -32    
192    96     
-112   -256   
-528   -96    
-96    -256   
112    0      
144    -64    
-64    32     
64     -304   
-352   128    
64     -2096  
-128   -64    
80     0      
0      -96    
-256   0      
64     240    
-432   -160   
-320   -400   
-400   -144   
48     -16    
-1424  -80    
48     -48    
32     -64    
0      -192   
16     -16    
-16    -1088  
96     80     
-192   16     
32     -80    
-144   32     
112    -224   
-192   -144   
192    -112   
-112   -240   
-80    -144   
-16    64     
32     96     
-192   -16    
-96    -176   
160    160    
0      48     
16     64     
144    -240   
16     -192   
-80    -96    
176    0      
288    256    
-208   80     
-64    32     
208    0      
-208   16     
32     -144   
32     80     
144    112    
64     80     
64     -48    
128    128    
-240   -16    
-16    -16    
-592   0      
64     48     
-144   16     
0      -48    
-64    128    
192    16     
-240   -48    
-16    -176   
96     32     
-32    -112   
32     16     
16     -352   
32     48     
-320   16     
96     48     
16     64     
-64    -48    
-208   -64    
192    32     
-144   -64    
48     64     
-96    0      
64     16     
-64    64     
-1504  -112   
0      240    
-832   -16    
-1440  0      
0      48     
-368   208    
512    656    
-1648  688    
-160   336    
0      160    
16     -192   
0      -336   
48     -240   
-224   -288   
192    64     
-208   -144   
64     32     
-16    -128   
-192   176    
-32    192    
-176   32     
144    208    
-944   208    
128    416    
144    400    
112    -208   
-64    -224   
-144   0      
-464   -208   
-48    224    
96     -256   
-96    -224   
-32    16     
-32    272    
288    272    
-432   -496   
96     368    
-224   -16    
32     128    
-32    96     
-128   -48    
-576   -544   
-112   496    
-80    -256   
48     416    
-16    192    
160    -96    
32     160    
-224   -128   
32     192    
-144   -176   
16     -128   
160    576    
-272   -368   
-240   -160   
-16    16     
-336   64     
-32    352    
0      160    
160    352    
80     224    
0      128    
-464   -16    
-368   -544   
-80    -384   
48     336    
0      208    
-272   16     
-224   -176   
-112   -400   
256    48     
-160   224    
0      224    
-176   -464   
-64    -48    
-176   -144   
-224   -64    
-32    -32    
-176   -32    
16     224    
48     272    
-64    -144   
-160   -400   
208    224    
-144   592    
-32    -80    
-400   -32    
192    272    
-848   -112   
0      240    
208    128    
96     368    
16     -48    
-208   -144   
-240   -240   
48     -128   
16     -64    
192    128    
-208   80     
96     80     
-16    128    
-80    -80    
-480   -368   
112    -256   
-288   912    
224    -160   
-32    64     
-176   160    
-96    -336   
-304   -32    
256    32     
320    448    
-432   -304   
-64    16     
-64    224    
48     -48    
-304   448    
-32    32     
-192   160    
-320   800    
-16    48     
-480   -816   
-16    144    
160    144    
-288   544    
128    -224   
-160   -32    
-128   464    
48     -192   
-80    432    
-16    64     
-144   640    
80     -16    
-80    1264   
-144   -544   
-128   16     
-16    160    
176    -48    
-224   -576   
240    208    
-80    480    
240    112    
-320   288    
64     -48    
-288   64     
192    128    
-240   32     
176    0      
512    432    
-400   -80    
32     -208   
16     -64    
304    0      
-224   -464   
336    480    
-176   -48    
32     176    
-80    368    
192    80     
-304   -112   
-96    208    
96     -256   
-64    208    
16     -48    
0      48     
208    48     
-96    80     
48     144    
-224   -608   
176    336    
96     496    
-160   -336   
48     -32    
336    208    
-208   0      
208    240    
-16    160    
-128   224    
240    160    
-128   0      
80     32     
16     32     
-48    96     
-16    32     
128    112    
32     32     
-112   -160   
48     96     
-64    224    
112    160    
32     256    
96     112    
0      496    
224    288    
-112   128    
128    64     
-128   -16    
16     -64    
208    112    
96     176    
48     128    
-208   -496   
160    -240   
208    192    
-176   16     
48     48     
144    96     
96     224    
0      96     
48     160    
112    96     
-128   32     
80     32     
64     -64    
32     112    
-64    -192   
16     16     
160    144    
-192   80     
64     16     
96     112    
64     96     
-32    48     
144    32     
-64    80     
144    96     
-176   16     
112    48     
-144   -96    
544    32     
-336   112    
624    144    
-368   96     
16     80     
0      32     
32     -32    
16     0      
0      -656   
32     176    
-176   -96    
32     -128   
-64    32     
-96    96     
-16    16     
64     128    
-48    -48    
-32    80     
-96    -208   
112    80     
-176   -32    
48     -192   
240    176    
-80    -272   
0      16     
208    240    
0      48     
-32    48     
32     112    
112    -16    
64     -16    
48     -16    
192    48     
-16    -32    
272    240    
80     208    
144    64     
64     -144   
288    -352   
-64    224    
112    352    
80     48     
-144   64     
-144   -128   
-144   -656   
336    144    
-304   144    
32     96     
-176   -80    
144    -160   
48     -128   
-64    -144   
208    256    
-352   0      
192    352    
-16    -480   
-48    -128   
128    -576   
-256   -192   
-96    -224   
0      240    
-64    224    
48     128    
-160   -272   
-192   16     
48     144    
-176   80     
0      272    
-416   -96    
48     192    
-208   384    
-224   160    
368    -1136  
-320   224    
96     64     
176    64     
176    128    
240    128    
-80    96     
144    -96    
-128   144    
64     -288   
-48    80     
448    48     
-160   112    
96     -96    
-80    96     
160    -112   
-160   224    
-16    144    
272    96     
-256   0      
304    -16    
144    48     
-48    0      
96     128    
176    -176   
400    288    
-400   -112   
64     32     
32     -352   
0      -208   
96     64     
0      128    
-96    -16    
32     96     
48     -32    
48     80     
64     128    
-48    0      
192    160    
-32    16     
-96    112    
48     -144   
64     112    
128    128    
160    64     
-64    -144   
48     -1200  
16     112    
112    -336   
32     0      
-128   128    
48     -288   
64     -48    
64     -656   
64     -80    
176    128    
-208   32     
144    0      
0      80     
240    208    
-80    80     
0      -32    
112    80     
176    32     
96     -544   
-736   -16    
-32    -32    
-16    -16    
192    -464   
0      -112   
304    -96    
-160   -64    
80     -224   
32     -176   
112    -32    
-208   144    
16     96     
176    96     
-176   -80    
80     -128   
-384   0      
32     16     
-16    16     
64     -16    
-144   -128   
320    -352   
-208   -128   
-80    -1040  
-112   -240   
368    -256   
-272   48     
128    -160   
-96    -64    
-176   -112   
0      -192   
-240   -240   
176    368    
-752   48     
128    -272   
-32    128    
48     192    
64     -288   
-80    -400   
-16    80     
32     240    
32     0      
-128   -144   
-64    -448   
48     528    
64     -224   
-48    64     
16     128    
-1136  -208   
64     -240   
-48    -96    
240    192    
-320   -128   
-208   -896   
16     -496   
256    -1568  
144    896    
32     176    
48     -160   
-32    -48    
64     48     
-80    -32    
0      -112   
-576   -16    
-16    256    
-1552  -80    
96     0      
16     -48    
96     -128   
-16    80     
96     -448   
80     96     
-64    -48    
64     -128   
-96    112    
176    16     
-48    80     
-32    -32    
112    80     
240    144    
-144   -112   
64     -112   
112    64     
80     288    
496    352    
-400   -880   
48     -96    
-112   96     
48     -240   
-160   16     
224    80     
-272   96     
464    288    
-144   336    
-48    160    
-352   64     
16     176    
256    -32    
48     -336   
-64    -64    
-144   96     
320    -176   
-432   0      
768    320    
-176   640    
-64    592    
-48    -96    
-144   -176   
80     -272   
-192   -320   
-16    -272   
176    -336   
480    352    
208    400    
-224   208    
48     -304   
-64    -208   
-224   -272   
0      -368   
-160   -160   
432    368    
-80    400    
400    -16    
-368   -80    
0      -320   
128    -560   
176    144    
32     112    
-960   -224   
-208   96     
-1008  -672   
-416   224    
400    -96    
112    480    
-224   656    
-1632  -384   
-96    96     
-32    -128   
-80    32     
-96    -336   
-16    448    
-304   -96    
624    208    
-656   -272   
-80    -288   
-160   256    
48     192    
-208   256    
-192   -64    
-368   -64    
-128   -112   
-160   464    
-736   -448   
-64    -256   
192    384    
-96    80     
-96    -96    
48     64     
-224   -32    
0      -256   
-112   -16    
-224   0      
16     160    
-240   -400   
-176   -240   
48     -224   
-144   -144   
-176   -288   
96     48     
-224   -144   
304    160    
-48    32     
352    176    
-256   128    
16     112    
-176   96     
128    192    
-192   144    
64     400    
432    48     
-416   -48    
-96    -112   
-208   -160   
32     128    
-128   352    
-64    672    
-160   80     
128    -32    
-96    -304   
160    -128   
-48    -48    
96     -96    
-48    32     
-48    -240   
-160   0      
80     -48    
-16    80     
16     -16    
-96    80     
160    64     
288    256    
-368   112    
368    0      
-320   -48    
272    192    
-224   256    
64     112    
112    320    
-64    48     
-80    64     
0      224    
112    224    
-16    -32    
-48    -16    
-560   -32    
64     80     
-736   -48    
-48    272    
32     144    
-32    0      
160    32     
80     96     
-272   48     
-96    128    
176    -64    
-192   80     
112    80     
-208   -64    
-32    144    
-80    240    
-176   192    
-96    -64    
144    288    
-80    -96    
-144   16     
176    32     
-128   -64    
16     -32    
16     96     
144    48     
0      48     
-16    -80    
-80    64     
96     48     
-224   -48    
96     112    
-288   96     
-128   96     
64     80     
-96    16     
16     160    
-112   32     
48     0      
48     0      
-48    32     
32     64     
-112   64     
128    48     
-128   96     
112    192    
-208   48     
0      32     
176    32     
-48    16     
96     0      
-64    32     
112    112    
176    -32    
-224   -224   
-64    -624   
0      -16    
80     608    
96     432    
-128   -96    
-192   -176   
176    64     
-80    64     
32     -48    
-16    144    
112    64     
-32    48     
16     16     
-208   96     
160    112    
-224   16     
64     64     
32     96     
48     96     
16     144    
-128   0      
16     32     
-48    96     
304    144    
-176   16     
80     64     
112    208    
-32    144    
-64    224    
208    368    
192    336    
-240   -64    
224    64     
-192   -208   
-128   272    
80     112    
-208   -80    
80     144    
-96    32     
48     112    
64     64     
64     96     
0      -64    
-400   -448   
528    -48    
-96    304    
-48    -16    
-112   0      
-112   -160   
160    64     
128    128    
-48    80     
32     -16    
304    336    
-176   48     
64     96     
0      96     
96     32     
128    208    
-80    -32    
-112   -64    
144    112    
-432   -240   
480    112    
-192   208    
48     16     
-160   96     
176    192    
-224   16     
192    224    
-384   32     
352    144    
-32    224    
-304   16     
-16    48     
0      128    
256    32     
-16    112    
64     -160   
-144   -784   
112    64     
-112   192    
256    64     
-80    32     
256    144    
-128   80     
112    96     
80     64     
0      -176   
32     64     
96     208    
-176   -16    
128    160    
-16    -96    
0      -368   
144    64     
16     -624   
144    64     
192    64     
-112   112    
16     144    
-64    80     
-16    80     
80     80     
-16    176    
384    368    
-240   32     
272    128    
80     256    
128    112    
-96    256    
192    16     
-112   16     
16     32     
144    128    
96     96     
64     80     
-48    64     
176    128    
-80    -80    
-96    -496   
-144   -224   
112    -208   
-112   -352   
96     64     
48     368    
112    -480   
80     -32    
-304   -1088  
352    0      
80     560    
48     80     
64     -416   
-224   -544   
176    352    
-128   -48    
-16    -368   
32     48     
176    96     
-112   -128   
-128   112    
400    -144   
-96    80     
0      -80    
32     96     
64     -464   
32     112    
192    224    
-272   368    
128    -304   
448    336    
-32    464    
64     -704   
-112   208    
48     -112   
144    32     
0      -32    
240    496    
-16    48     
-16    208    
-16    -1072  
160    224    
-128   144    
112    336    
-32    0      
64     144    
80     48     
-64    -128   
256    320    
-64    -240   
32     64     
-16    -432   
32     112    
16     -608   
-16    144    
0      64     
-32    64     
176    240    
-80    48     
96     -192   
-128   176    
112    0      
224    -400   
32     160    
-240   -160   
-80    -160   
16     -240   
-80    48     
160    0      
-32    176    
16     -128   
32     112    
160    112    
-16    -976   
48     -64    
16     -80    
-48    -528   
48     48     
256    -992   
-192   -336   
112    -288   
80     208    
272    288    
16     144    
80     112    
-64    -192   
192    -816   
144    256    
-32    -464   
0      48     
-432   128    
576    864    
-224   192    
-48    -1488  
-208   -288   
304    -976   
-176   32     
304    128    
32     112    
16     -256   
80     -496   
128    -784   
48     320    
240    144    
-176   -96    
-384   -160   
128    80     
-64    -480   
368    -96    
160    544    
-464   -64    
-48    -592   
48     -1920  
192    -112   
160    208    
160    272    
256    -16    
-16    176    
-32    -192   
-208   -352   
-288   160    
-208   -704   
-16    -592   
-80    80     
-48    48     
16     -320   
240    416    
-304   -1232  
-112   -480   
-48    -320   
400    496    
96     208    
256    336    
-496   -976   
176    -320   
-304   240    
144    -240   
-1200  -512   
-64    -352   
272    -320   
-16    -432   
304    480    
272    32     
-96    224    
96     304    
256    -80    
-160   -288   
224    208    
-208   96     
-112   64     
-240   -144   
-128   96     
-336   -144   
-96    -128   
-48    -80    
-16    -64    
112    64     
144    192    
144    208    
112    -256   
176    160    
-48    -64    
176    416    
32     96     
-32    -32    
32     16     
336    48     
-192   80     
-96    -80    
112    -48    
-16    -128   
272    48     
128    -32    
-32    96     
-32    -1248  
208    192    
-64    48     
-16    32     
80     64     
-304   -336   
304    64     
-16    -16    
-224   -128   
112    16     
-144   64     
48     -256   
16     -32    
-32    -304   
-64    192    
128    -144   
-176   80     
-144   0      
96     -48    
-416   -16    
32     -16    
-32    16     
80     -16    
-288   -80    
96     48     
-128   0      
-80    -224   
224    0      
0      -16    
224    96     
16     -96    
-32    0      
-160   0      
192    64     
-384   -32    
96     64     
48     16     
-176   128    
96     48     
-128   -144   
48     112    
16     -32    
16     32     
-224   -288   
112    48     
-992   -160   
-192   -64    
-208   -32    
176    96     
-192   -16    
96     -16    
-96    48     
208    48     
-256   -64    
16     -64    
16     -48    
-624   -32    
-128   160    
-128   -256   
-48    96     
-752   -288   
-176   32     
-112   144    
224    144    
144    144    
-224   -32    
32     128    
256    0      
-144   16     
224    80     
0      16     
-288   -176   
32     -144   
-48    -48    
160    144    
-144   80     
0      96     
0      208    
-48    96     
-144   -64    
-464   -48    
112    96     
-576   48     
48     80     
48     112    
400    288    
-496   -16    
176    32     
-160   -16    
192    16     
-112   96     
-32    -80    
-160   32     
-64    -16    
-16    -48    
64     -80    
-144   80     
32     112    
-112   64     
-208   -320   
96     -80    
-144   -112   
-48    128    
160    32     
32     -32    
-64    80     
-32    96     
0      96     
16     112    
32     96     
-48    96     
-96    48     
-160   -128   
112    32     
-128   -240   
192    48     
-48    0      
-128   0      
64     64     
-288   64     
-80    64     
-96    -32    
64     -32    
64     112    
64     48     
-384   -64    
192    128    
-320   -64    
240    80     
-272   32     
128    64     
-128   64     
176    48     
-32    16     
32     -96    
0      -224   
32     336    
-16    112    
-96    -128   
0      48     
-48    80     
-16    64     
-144   16     
160    64     
-320   -16    
-64    -432   
-368   -336   
128    80     
-64    160    
-80    48     
48     144    
0      96     
32     144    
-112   32     
80     -16    
32     64     
64     48     
16     16     
128    112    
-272   -80    
0      0      
160    0      
-272   -96    
176    32     
128    144    
-176   80     
160    -16    
0      160    
-64    80     
-112   -16    
0      -112   
64     144    
96     -64    
-240   96     
240    -144   
-320   -48    
160    16     
-256   -208   
32     -480   
48     -80    
240    160    
96     240    
32     416    
64     80     
48     -16    
-96    -32    
-32    16     
-32    0      
-16    192    
-48    -16    
208    224    
-208   176    
64     64     
-96    -48    
48     0      
32     32     
-64    64     
144    96     
-208   -128   
144    -96    
-192   -272   
48     64     
-176   0      
304    480    
-160   160    
-96    128    
144    -16    
-32    -128   
48     -192   
-96    -96    
112    400    
0      224    
48     -96    
-128   -240   
128    112    
-256   -48    
208    -48    
-128   224    
208    48     
-272   -144   
32     48     
-144   -160   
96     64     
192    -32    
-96    256    
144    -256   
32     240    
0      -112   
64     96     
288    352    
-400   -384   
240    112    
-224   288    
176    128    
-32    -80    
176    432    
160    80     
64     160    
0      -128   
16     96     
48     112    
144    64     
16     48     
64     64     
16     112    
-64    64     
48     32     
-48    16     
96     80     
-112   -48    
224    -304   
-32    144    
-32    144    
192    -112   
-192   160    
160    32     
-32    80     
112    64     
-32    -96    
176    224    
-112   160    
96     48     
192    -160   
-32    -304   
208    144    
48     192    
-96    96     
32     48     
-144   -48    
192    48     
48     80     
-48    -96    
192    112    
-400   -160   
64     -48    
-112   -144   
48     272    
32     32     
-160   -368   
112    112    
-80    352    
112    128    
16     96     
448    832    
64     176    
-32    288    
-128   304    
160    16     
-96    64     
32     64     
0      -112   
80     176    
-128   -48    
0      -64    
128    64     
-32    -448   
32     32     
-48    48     
144    96     
-112   80     
64     96     
-16    -96    
-160   -336   
-256   -544   
96     -288   
-64    -64    
48     208    
16     -64    
96     -192   
-48    -320   
272    -416   
96     384    
272    1376   
336    512    
-848   -768   
288    -512   
-240   240    
128    640    
-96    112    
96     128    
16     -336   
-320   -288   
320    -448   
96     -96    
336    432    
-208   -336   
128    144    
-32    -1376  
32     352    
192    -480   
-288   -96    
48     288    
0      -80    
0      160    
192    0      
-144   -112   
240    80     
32     192    
32     80     
-32    64     
64     -208   
96     112    
-112   -208   
288    160    
160    -672   
48     -112   
96     -16    
-64    -224   
240    -192   
144    128    
128    160    
192    112    
32     32     
-80    -288   
-192   -544   
144    -304   
96     192    
-112   -128   
-16    112    
368    48     
-448   48     
240    192    
208    192    
-192   176    
496    32     
-80    96     
240    -208   
-16    304    
-240   -400   
208    192    
-96    -80    
128    80     
-128   -256   
64     144    
-96    -736   
-32    80     
16     -16    
176    112    
-112   64     
112    -368   
-16    128    
-48    -96    
144    128    
96     160    
-256   48     
160    -48    
176    80     
96     -112   
-208   16     
208    -208   
64     -80    
-96    0      
-32    -688   
272    80     
-112   -48    
176    -400   
32     0      
48     -288   
48     0      
48     48     
-32    -224   
160    192    
-96    -224   
160    -32    
-48    32     
64     -400   
0      16     
112    -544   
352    112    
-800   16     
32     -64    
32     -96    
0      -80    
-128   -160   
64     -736   
112    0      
80     96     
16     -16    
128    80     
0      96     
-32    -272   
160    128    
0      -48    
-112   80     
-544   -64    
-16    -192   
192    -32    
32     -320   
96     -32    
-16    -224   
192    96     
-112   -1296  
16     16     
192    -32    
-112   80     
192    -96    
-32    16     
96     -192   
-32    -208   
-688   16     
-192   -160   
-336   -144   
160    -32    
160    64     
-128   -80    
-16    -16    
224    -576   
-320   -176   
48     -16    
128    80     
112    16     
-240   -240   
-64    -16    
256    48     
-592   -16    
272    64     
-592   -48    
176    224    
-96    -208   
-64    -176   
16     -192   
96     16     
208    80     
-80    -640   
48     112    
-64    -240   
16     -320   
16     -32    
160    176    
0      128    
32     -128   
-192   16     
-32    -208   
-736   48     
80     -64    
-256   0      
64     -64    
144    112    
-96    -752   
16     0      
80     0      
240    0      
-80    16     
16     -112   
-64    32     
144    -112   
-192   -80    
48     -96    
-160   -16    
48     48     
208    80     
-112   -304   
-80    160    
160    -528   
96     80     
-48    16     
96     -32    
-16    -80    
-48    -32    
0      -224   
96     0      
-256   48     
-16    16     
64     48     
0      0      
80     128    
-64    -160   
96     32     
48     -224   
112    32     
-144   -64    
-80    -192   
112    -16    
0      -16    
64     32     
128    64     
-96    -144   
336    -48    
-128   -96    
288    -160   
-128   0      
224    -96    
-16    80     
128    80     
96     -80    
-176   16     
48     -96    
16     -64    
112    -64    
-64    -32    
80     128    
-240   -96    
0      -96    
0      64     
-96    -224   
32     32     
-656   32     
96     -16    
-800   -432   
-768   -32    
48     -32    
-432   -864   
-16    -464   
-96    -128   
-96    -640   
96     -48    
224    464    
80     112    
-144   320    
-64    -96    
-96    -128   
144    -240   
-80    64     
112    48     
-448   64     
112    64     
-128   128    
-64    144    
-784   16     
48     112    
96     -80    
-416   -512   
96     -208   
160    80     
-256   64     
192    240    
-464   -64    
0      48     
-272   240    
-16    32     
64     128    
368    384    
-368   320    
-416   208    
80     -16    
-48    -48    
-144   -176   
336    -224   
-16    16     
-112   -496   
64     752    
-64    192    
-176   64     
48     48     
-48    -112   
-80    16     
-64    -128   
-64    48     
192    256    
-336   48     
-176   -96    
-80    96     
-160   -240   
128    112    
-80    80     
368    224    
-160   496    
-64    -144   
64     16     
-16    -96    
48     32     
-64    64     
80     64     
-16    32     
0      80     
0      288    
32     -128   
-1168  304    
-160   480    
96     -544   
208    -400   
32     352    
-96    256    
48     -64    
-240   128    
-32    16     
32     80     
-96    -80    
-192   -384   
-240   -336   
-368   -176   
144    560    
-128   112    
112    32     
0      -16    
80     32     
-48    80     
144    384    
-176   176    
-144   -144   
48     -384   
80     -112   
-144   448    
128    64     
-64    112    
-112   48     
16     32     
-80    64     
-64    32     
-192   -48    
-32    16     
-48    80     
0      0      
96     80     
-16    80     
-80    16     
48     240    
128    528    
-80    176    
-64    288    
16     48     
-32    -64    
-208   -16    
80     96     
-624   48     
-16    96     
144    192    
48     -64    
-64    -16    
16     32     
-80    112    
128    192    
-64    64     
-64    -80    
80     0      
-112   -32    
80     96     
-160   -48    
96     176    
32     32     
288    480    
32     672    
64     144    
80     80     
32     144    
-80    64     
-128   -320   
48     -272   
-16    -32    
-128   816    
304    1056   
-176   752    
224    544    
-208   48     
80     0      
-96    -48    
112    128    
-48    64     
-96    64     
192    128    
112    144    
80     784    
128    288    
-304   -176   
112    64     
-160   48     
112    64     
512    800    
-672   -272   
160    -288   
32     656    
-48    48     
64     -416   
48     320    
-144   64     
16     288    
-128   -256   
128    176    
224    528    
-176   128    
-32    -400   
288    112    
-240   208    
64     -80    
240    288    
-288   -112   
48     -144   
-48    96     
80     272    
-128   192    
-96    -144   
96     448    
-64    368    
64     80     
-64    -80    
-96    -112   
336    256    
112    240    
32     96     
112    48     
-16    -128   
16     16     
80     96     
-16    128    
-272   -112   
176    96     
48     64     
64     192    
-448   16     
-64    -656   
-528   -608   
272    -800   
-272   160    
-32    64     
-144   -144   
160    176    
-144   32     
-128   0      
112    32     
-96    224    
144    112    
-272   32     
320    176    
-224   -32    
80     96     
-128   -272   
96     -32    
80     80     
-32    -64    
128    192    
-128   240    
-80    192    
64     80     
-32    48     
176    144    
-32    96     
352    -80    
-736   192    
368    -240   
-368   160    
368    192    
-272   -48    
32     208    
-64    -496   
112    32     
96     -112   
144    -32    
-96    32     
16     112    
-16    112    
64     96     
-192   -304   
304    112    
64     0      
48     -16    
192    80     
-64    -176   
224    0      
128    -880   
256    80     
-48    96     
144    112    
-176   0      
-16    64     
160    -160   
-96    160    
144    16     
304    192    
-384   -128   
160    112    
128    -16    
48     -192   
48     80     
32     -176   
80     80     
-144   144    
32     48     
48     32     
-32    -48    
-48    -16    
272    256    
-256   64     
-32    112    
-16    48     
16     -96    
80     64     
208    48     
48     80     
384    192    
-368   112    
208    -1056  
-208   96     
144    128    
-32    32     
-80    -16    
160    128    
-32    96     
-16    32     
-16    -64    
160    272    
-32    160    
16     -176   
-128   -96    
128    -240   
-112   32     
64     -128   
96     192    
16     -608   
304    256    
-560   208    
176    16     
-112   48     
128    128    
96     176    
-128   -128   
192    80     
176    -16    
16     -192   
-16    -128   
352    336    
-368   48     
112    64     
144    -80    
-64    224    
-128   16     
32     96     
144    64     
-48    -32    
-32    32     
112    -160   
96     80     
80     -64    
144    80     
-16    -16    
256    256    
-160   96     
-48    48     
128    -1136  
48     0      
112    144    
96     48     
48     32     
32     -224   
128    -240   
64     -112   
112    112    
64     0      
80     96     
-208   -304   
160    16     
80     -176   
128    160    
-96    -128   
128    -304   
112    160    
48     -80    
-16    0      
-272   -144   
288    -560   
64     48     
-16    -720   
96     -48    
-32    -64    
-112   -304   
192    -64    
144    -112   
96     -64    
-80    -16    
224    -336   
0      112    
32     -592   
-96    -416   
-16    16     
-64    -96    
336    352    
-272   -176   
-176   208    
128    -736   
48     -32    
208    256    
-64    48     
272    -336   
32     -160   
128    -192   
-160   -48    
0      80     
-48    -144   
224    304    
-144   -288   
-32    -304   
48     -336   
208    -112   
16     -16    
-112   -112   
256    -208   
-96    -112   
112    0      
-48    16     
-144   -176   
-64    176    
80     256    
16     64     
-128   48     
32     -48    
-1328  16     
48     16     
224    368    
224    176    
0      96     
352    -128   
-176   -192   
176    -128   
0      -352   
-64    -336   
320    -16    
-352   160    
320    -32    
-288   -176   
304    -64    
-208   80     
160    96     
48     -16    
-48    -208   
96     -304   
0      -288   
192    -160   
-32    -112   
128    336    
-48    176    
-48    -160   
16     -208   
80     32     
-32    80     
144    -144   
-320   -64    
256    -240   
-928   -144   
192    -192   
-176   160    
160    -144   
-16    -16    
-32    -928   
16     96     
-400   336    
208    -416   
-272   -448   
320    432    
-112   32     
144    192    
-432   -256   
224    -128   
0      320    
48     -64    
-96    -432   
272    80     
416    624    
-400   -176   
96     224    
-176   -480   
-128   -192   
240    -128   
-144   384    
-128   32     
-16    -96    
112    112    
208    48     
-208   -32    
-48    -48    
128    64     
16     -240   
160    128    
-176   -208   
16     -320   
208    -144   
-176   240    
288    -240   
-256   32     
-32    320    
-16    -192   
-288   -16    
112    -800   
-128   -160   
-16    -336   
336    144    
-96    336    
112    -64    
144    -32    
-112   96     
0      0      
48     -16    
-48    -32    
16     48     
-64    -96    
-64    -80    
144    16     
96     304    
-224   -32    
304    -208   
-16    144    
-288   -32    
-208   64     
80     -144   
-336   96     
-144   -32    
-464   48     
-16    16     
-832   64     
0      48     
64     -32    
-112   48     
48     -48    
-48    32     
-384   -144   
528    400    
-256   224    
-16    -688   
-64    256    
112    304    
-128   192    
96     112    
-48    64     
-176   0      
-16    -256   
288    176    
0      96     
48     -16    
64     96     
192    352    
-336   352    
-160   -880   
0      -256   
-112   768    
16     -528   
0      -144   
272    144    
-368   -464   
-192   192    
32     -64    
-432   -16    
144    0      
240    400    
-128   800    
16     -144   
16     272    
-144   -384   
112    -144   
256    608    
-80    64     
32     -128   
-16    -16    
48     32     
-192   48     
32     0      
16     304    
48     144    
-1872  -32    
-32    -144   
16     592    
160    512    
-16    144    
-64    -176   
-96    -16    
-96    128    
-240   0      
80     -352   
-48    -208   
-208   -192   
240    -32    
-128   32     
-144   48     
-1088  -48    
-176   -144   
96     80     
-240   320    
-32    -192   
240    -304   
-64    -224   
80     80     
-112   -48    
0      48     
-32    0      
0      112    
80     64     
-176   -144   
96     48     
-32    32     
-80    272    
64     -48    
-192   -80    
0      16     
32     112    
-192   -400   
-64    -208   
112    0      
-112   128    
-160   -144   
160    192    
-144   64     
192    64     
-112   96     
0      -80    
32     128    
-528   -192   
64     48     
-272   48     
-48    -128   
496    256    
80     352    
-16    256    
-384   208    
160    128    
-224   -176   
32     -160   
-144   -32    
-96    -32    
-256   -128   
64     160    
16     80     
-16    352    
-96    208    
112    112    
-32    -64    
0      -96    
-208   80     
64     128    
32     -96    
-96    -16    
112    -16    
-160   0      
384    96     
-192   -112   
240    112    
48     128    
-144   176    
48     176    
-144   256    
16     128    
-256   -192   
16     144    
-96    144    
160    0      
-192   -272   
144    208    
32     272    
-96    128    
-80    -64    
80     96     
-112   208    
-64    128    
-64    64     
-64    80     
-48    208    
16     288    
0      304    
-272   64     
144    -224   
-144   32     
160    -16    
32     16     
-16    96     
-80    0      
80     128    
-16    112    
16     32     
16     80     
80     64     
-128   48     
0      144    
144    80     
-160   0      
32     16     
16     -48    
16     32     
16     32     
64     96     
112    0      
-48    160    
336    144    
-192   32     
16     80     
16     16     
112    96     
80     96     
-96    96     
32     112    
96     64     
-112   64     
192    128    
-224   -80    
16     48     
0      0      
48     -64    
-16    208    
176    144    
-304   16     
304    224    
-304   96     
192    48     
-224   80     
144    32     
96     112    
-208   0      
208    112    
-224   -48    
-128   -64    
272    -48    
112    128    
48     160    
-32    32     
-80    -160   
0      0      
80     16     
112    128    
-16    128    
224    192    
-144   144    
0      144    
96     96     
-32    -160   
96     -256   
-64    0      
-32    32     
32     128    
-16    -32    
-112   16     
80     48     
16     160    
64     64     
16     16     
-96    16     
96     32     
-112   -48    
32     32     
48     -16    
96     -192   
16     160    
0      -1488  
0      32     
32     64     
208    16     
96     80     
-128   176    
-32    224    
112    96     
-64    -144   
224    176    
-192   112    
-272   32     
240    80     
64     -16    
-80    160    
0      -272   
144    80     
80     -112   
-128   -208   
112    -48    
16     96     
-96    -48    
176    256    
32     -112   
16     -112   
16     -64    
48     144    
96     144    
-32    -16    
288    880    
-176   32     
112    16     
80     -928   
-48    -80    
112    -224   
-80    64     
256    416    
-208   -384   
64     208    
-144   -176   
192    -144   
-64    352    
0      32     
-32    -96    
96     -192   
0      -288   
64     -32    
-144   -544   
32     48     
0      -160   
16     96     
0      -32    
0      160    
192    240    
-64    -144   
-112   32     
208    -16    
0      -176   
32     -432   
16     256    
0      -144   
-32    144    
256    -16    
-128   48     
256    32     
-208   -160   
80     -96    
-32    32     
48     96     
80     256    
32     80     
208    0      
128    192    
-80    -1024  
-32    224    
-64    -224   
368    464    
-16    448    
-288   -272   
32     -368   
-96    -80    
240    32     
-160   208    
64     -464   
336    -192   
336    128    
-16    -176   
-464   -704   
1104   -384   
96     1296   
400    400    
-208   -240   
96     -464   
-80    240    
144    16     
96     368    
-272   64     
192    -528   
-176   16     
-16    272    
48     -1584  
336    -128   
-128   192    
480    256    
-464   0      
160    -144   
-272   304    
192    -192   
112    496    
-464   -224   
448    -448   
-128   672    
64     -720   
224    -448   
-256   -80    
96     -416   
-128   320    
496    -1072  
-96    368    
-128   -224   
112    -592   
176    240    
32     16     
224    160    
16     128    
144    16     
-192   48     
160    32     
80     -208   
-640   -32    
80     48     
192    256    
-240   -64    
-96    -576   
128    -1984  
208    160    
352    -208   
-256   80     
384    -128   
-48    -112   
-32    -32    
256    -96    
-192   336    
-48    -128   
-256   -112   
144    32     
32     576    
384    -416   
48     -128   
-192   288    
272    -224   
-112   32     
192    -160   
80     48     
-32    512    
144    -64    
-80    -336   
-48    160    
-112   -800   
-64    272    
240    -304   
272    208    
-96    352    
208    -32    
48     -128   
16     -48    
96     -592   
-32    80     
32     -16    
16     80     
160    48     
16     -32    
-224   -176   
176    96     
-352   -112   
-96    -304   
80     -176   
-64    320    
64     16     
-48    -384   
176    -112   
160    64     
-16    416    
0      -640   
0      -96    
160    96     
80     -64    
-160   80     
224    320    
16     0      
-48    -160   
-64    -176   
64     -192   
-192   0      
-64    -128   
176    416    
64     -176   
-16    64     
80     -368   
48     48     
-48    0      
-112   -80    
112    112    
16     144    
-576   128    
176    176    
-448   -32    
336    -368   
-192   96     
-80    -80    
-48    -16    
48     -176   
32     16     
-112   -304   
96     48     
-32    16     
32     -128   
-32    64     
128    -16    
-496   16     
-96    -80    
-16    0      
-48    0      
-96    80     
-128   -80    
192    16     
-48    -352   
256    240    
-80    -64    
16     80     
-64    48     
32     96     
-176   -16    
368    112    
-608   32     
32     32     
-240   176    
288    -128   
-784   -96    
80     -112   
112    160    
-96    -32    
16     128    
-384   -48    
-1088  -32    
160    16     
-1584  -16    
-32    -48    
-32    -16    
128    128    
144    80     
16     96     
128    -144   
0      32     
-160   -96    
0      144    
144    128    
-144   224    
-32    -48    
-16    -160   
32     -64    
-48    16     
-112   -64    
-112   -32    
-80    -112   
32     -16    
80     96     
-736   -704   
224    -448   
-128   -48    
432    208    
144    -32    
-224   16     
0      240    
-176   -112   
48     32     
192    272    
208    176    
-256   -192   
-96    -112   
-1520  -32    
112    112    
-192   96     
224    320    
-288   80     
-16    -64    
-160   -352   
-64    32     
48     48     
-64    48     
224    160    
144    -16    
-16    -80    
-272   -144   
-128   -64    
-224   0      
-128   0      
-176   224    
32     352    
-96    -80    
-32    336    
96     80     
112    80     
128    112    
-48    -176   
0      16     
528    496    
-512   272    
-16    -48    
-16    96     
128    0      
-48    80     
-2112  -96    
64     64     
-208   -240   
304    144    
-80    64     
-16    -32    
-32    112    
112    -32    
-208   -144   
48     32     
112    16     
32     160    
0      -96    
-96    -48    
80     64     
-512   -32    
128    128    
-112   -32    
48     -16    
80     -32    
16     0      
128    144    
-144   -16    
0      64     
112    112    
-48    -32    
-80    48     
16     -16    
-384   -64    
144    80     
-224   -64    
48     128    
64     -32    
-48    -48    
32     -16    
-64    32     
160    64     
-16    112    
32     16     
-48    112    
-64    80     
-64    -48    
-128   -96    
16     16     
-64    176    
112    64     
-48    -16    
192    -64    
-32    96     
16     48     
160    128    
-112   64     
80     96     
112    160    
-112   64     
208    96     
-112   112    
144    0      
16     208    
64     0      
-272   -256   
48     -176   
160    192    
-32    48     
0      112    
-64    96     
-272   -352   
80     -80    
16     -176   
32     160    
-144   -256   
160    -16    
16     -176   
-192   -352   
96     -160   
-192   -208   
32     16     
64     160    
-64    144    
-144   -320   
-32    112    
80     192    
-144   80     
352    416    
-256   -256   
-64    -176   
16     176    
-64    0      
-192   -16    
208    80     
-96    432    
64     304    
96     272    
96     192    
-48    336    
-16    96     
80     160    
16     -64    
-112   -80    
0      96     
0      64     
256    288    
-192   80     
-144   -256   
288    240    
-192   32     
112    16     
-16    112    
0      16     
-16    80     
144    112    
-208   320    
32     -256   
16     640    
0      0      
-176   -112   
0      -16    
-16    144    
-224   272    
64     -192   
-48    -32    
192    544    
-176   240    
-272   -336   
64     -96    
240    432    
-96    432    
-192   64     
160    32     
-160   -288   
304    -160   
-144   -112   
288    272    
112    288    
-64    -608   
240    16     
-160   176    
-32    -176   
352    -272   
80     128    
128    -32    
-64    16     
464    320    
160    720    
-80    320    
320    64     
-32    208    
-16    32     
144    -112   
256    -336   
400    320    
-16    64     
32     80     
256    64     
160    208    
144    -240   
304    -160   
144    192    
144    272    
-16    16     
96     -64    
128    -80    
208    672    
-80    784    
176    -192   
192    80     
-64    -32    
-32    0      
-96    112    
16     16     
-96    -192   
-16    128    
-64    1024   
96     -880   
-336   -496   
560    672    
-288   160    
176    -48    
-160   -32    
80     -432   
704    320    
-64    -1616  
-112   -592   
192    -112   
208    336    
112    16     
64     80     
-16    -176   
336    160    
80     384    
48     480    
96     -288   
272    -256   
48     352    
256    16     
-32    128    
176    -176   
-64    496    
176    -16    
16     336    
128    64     
-64    112    
-144   -288   
0      16     
-16    0      
80     16     
32     368    
-112   -112   
80     592    
192    0      
-128   -96    
16     -32    
-64    176    
-48    -2448  
-32    240    
112    192    
0      -112   
-64    96     
144    320    
-256   -144   
96     -320   
144    496    
-32    -368   
208    256    
-160   192    
80     -240   
80     -128   
-48    288    
224    -208   
-96    208    
112    -560   
-176   -368   
288    96     
-64    432    
192    224    
-48    16     
32     -352   
-32    -192   
112    512    
-32    0      
0      -176   
32     16     
144    464    
-112   144    
48     16     
240    -80    
-144   0      
-32    -64    
-80    16     
-48    -64    
128    -96    
-32    208    
-32    96     
-48    32     
112    -240   
-16    -16    
128    -80    
112    -64    
16     -272   
64     112    
-16    -960   
64     -16    
-32    16     
160    144    
-80    32     
192    64     
112    80     
64     -160   
16     96     
48     -224   
-16    -176   
144    -128   
16     128    
64     -176   
128    320    
-176   208    
0      -608   
64     -16    
64     -448   
80     -448   
-128   -48    
-48    -928   
176    -128   
32     -1312  
-48    -16    
96     -16    
16     -32    
128    64     
64     -48    
96     -304   
-16    -80    
336    0      
-48    32     
-80    80     
160    -416   
288    -96    
32     -144   
32     -16    
224    80     
-256   -112   
176    0      
-80    -192   
96     128    
-48    -96    
-32    0      
176    128    
-16    -16    
-32    80     
272    96     
-256   -448   
-192   -208   
-16    240    
256    224    
-208   -224   
48     -160   
32     0      
112    -48    
16     -352   
32     32     
-96    -16    
240    16     
48     -256   
64     -16    
-256   -64    
80     16     
-304   -80    
288    -96    
-160   -224   
48     -368   
-64    -208   
64     -448   
224    -32    
-48    48     
272    224    
-48    -64    
32     64     
-48    128    
-80    -16    
-16    64     
-192   48     
-16    96     
208    -208   
-480   -208   
64     -80    
192    -176   
224    -176   
304    -160   
80     -368   
112    -48    
-16    -48    
-48    -192   
432    -128   
-96    96     
272    208    
96     208    
64     96     
224    112    
-256   0      
112    80     
-144   -16    
80     -160   
144    80     
32     -128   
-32    -32    
96     -560   
48     16     
0      16     
128    -304   
-96    64     
-128   -128   
-272   0      
208    96     
-224   32     
96     -96    
-352   192    
-272   -272   
160    160    
64     -240   
-32    96     
144    -352   
-368   48     
192    -16    
-208   -160   
0      -32    
-80    -48    
-240   -64    
320    112    
-464   64     
96     -96    
-96    0      
-96    -256   
32     -32    
0      -96    
48     64     
80     -256   
-112   -16    
144    -16    
80     80     
-80    32     
0      0      
16     96     
16     -32    
-176   32     
144    96     
-176   80     
112    16     
-96    144    
112    -128   
-128   288    
128    -272   
-64    0      
-48    80     
32     16     
-16    64     
48     -112   
16     -160   
16     -144   
160    64     
64     -128   
-64    -32    
-272   -144   
-192   0      
0      -192   
144    96     
-80    32     
-544   -48    
-32    -192   
-352   -96    
16     96     
0      -128   
-16    16     
64     -144   
48     80     
32     112    
-256   80     
-352   -416   
128    -128   
-336   -400   
-64    80     
-32    -160   
-224   -144   
-112   -16    
16     32     
80     80     
-96    160    
-32    224    
-192   96     
-144   -16    
-144   -64    
128    80     
-144   0      
48     80     
-80    -32    
-32    32     
384    352    
-512   192    
128    112    
-160   -368   
272    416    
-128   288    
-208   -544   
-528   -320   
64     432    
-224   -448   
240    -32    
-96    -240   
224    128    
-224   -416   
-64    -48    
-32    96     
-16    80     
0      64     
-32    32     
-96    64     
-192   240    
-128   -160   
-688   -16    
-32    80     
336    144    
-16    48     
-224   -352   
160    112    
-16    160    
-16    64     
48     -32    
-16    0      
144    192    
-384   -112   
160    -144   
-160   288    
240    512    
48     224    
16     80     
-960   -64    
48     32     
-32    -80    
32     64     
80     48     
16     48     
-16    64     
-112   0      
-48    32     
-16    -16    
-48    64     
32     96     
-16    96     
-64    -48    
96     0      
-304   -80    
176    336    
128    400    
-128   80     
-32    -304   
-48    64     
-48    -32    
-48    -16    
-32    64     
-112   -192   
-352   -256   
0      -160   
-272   -32    
-528   -352   
-16    -160   
-464   -32    
544    352    
-224   336    
0      272    
192    -32    
-736   -544   
0      -368   
-160   32     
16     96     
32     -32    
-256   -32    
544    336    
-304   304    
-256   -32    
-208   -144   
-64    -64    
64     -240   
-112   -112   
-352   -288   
16     -96    
144    304    
176    128    
-64    32     
-96    48     
144    32     
224    112    
-96    48     
-96    128    
-176   -144   
-32    48     
-384   784    
-80    -576   
-48    -192   
-80    720    
-32    -432   
-144   32     
192    -624   
-208   -112   
64     336    
-240   -176   
496    80     
-112   400    
-16    160    
-32    -48    
192    160    
-320   96     
0      144    
96     -32    
-48    224    
224    192    
-80    0      
-192   -352   
224    -944   
-176   240    
96     624    
272    -672   
-288   -288   
-208   256    
-64    208    
-96    128    
-16    -32    
-80    176    
112    416    
-128   416    
16     -48    
-256   -496   
-128   -240   
96     96     
128    448    
-80    176    
112    80     
-32    16     
0      112    
16     -112   
224    144    
48     -48    
-128   80     
144    -96    
-64    -64    
64     -176   
128    80     
16     -64    
112    -224   
80     -64    
64     -288   
80     80     
-48    -352   
-16    -80    
160    48     
-176   32     
112    -16    
208    160    
80     96     
-16    -192   
64     112    
192    256    
-112   224    
-112   96     
-144   128    
-32    48     
32     96     
48     112    
48     -16    
-160   -160   
400    240    
-288   80     
160    80     
-112   128    
208    0      
32     96     
80     16     
-16    96     
-48    -128   
16     96     
96     160    
-48    32     
-112   16     
0      144    
64     -272   
-144   -1648  
128    0      
-80    16     
144    64     
48     112    
16     80     
160    176    
-80    128    
96     0      
-112   144    
320    -320   
-176   -144   
400    272    
-496   432    
112    32     
176    -32    
-192   224    
0      64     
64     80     
48     32     
-112   80     
32     16     
48     128    
-64    -80    
16     160    
48     -144   
-112   112    
80     48     
-432   16     
96     144    
-96    -16    
96     128    
-80    -1296  
96     144    
112    112    
176    224    
-144   112    
112    96     
64     -288   
128    112    
-16    -48    
144    144    
0      48     
-112   48     
192    192    
-16    -336   
-80    160    
224    -192   
-112   128    
176    -592   
176    48     
-256   16     
304    -64    
-208   -64    
128    112    
-128   16     
256    160    
-176   -16    
96     -208   
96     64     
192    -272   
-32    32     
64     -464   
48     -48    
-16    -2080  
-16    -272   
96     -112   
96     96     
-16    32     
160    208    
80     112    
112    176    
-80    -64    
-80    -208   
400    -16    
48     176    
-32    96     
64     176    
176    192    
96     -544   
-16    128    
64     48     
176    112    
0      48     
96     -144   
160    96     
-48    -32    
208    160    
-128   -384   
176    128    
80     -32    
-96    -48    
144    -32    
112    48     
64     -64    
0      -176   
208    -48    
16     208    
96     48     
-144   32     
112    32     
64     -208   
0      112    
80     -192   
-32    32     
320    448    
96     160    
176    16     
32     80     
48     -80    
64     368    
176    -400   
-64    -80    
288    128    
48     272    
144    0      
96     16     
64     -704   
32     -160   
-48    96     
128    -80    
-16    48     
64     -48    
0      128    
160    -256   
160    -832   
32     128    
208    -592   
64     96     
-32    -64    
176    -384   
-64    -208   
288    -80    
-80    -128   
352    -1408  
-208   -48    
224    160    
80     16     
96     64     
16     -160   
-96    -608   
48     0      
160    -176   
64     64     
-336   -208   
-96    -192   
-48    -160   
144    -128   
224    -48    
-64    -16    
224    -160   
-64    -560   
208    -64    
-304   64     
176    48     
144    32     
-80    144    
240    -192   
-96    80     
112    80     
-336   -192   
176    -144   
64     -64    
224    32     
192    -384   
208    80     
112    -144   
160    144    
-16    160    
-112   -48    
192    -64    
-144   208    
32     112    
96     -112   
-16    -80    
160    112    
-32    256    
-224   -224   
192    -400   
-32    -400   
16     -256   
144    -64    
48     144    
-112   -1520  
224    608    
-192   -240   
-48    256    
304    16     
-128   -144   
112    176    
-64    240    
-256   80     
336    720    
-528   -624   
-144   176    
96     -368   
32     320    
96     208    
-128   -688   
112    48     
-48    -96    
112    96     
-208   48     
480    80     
-224   -32    
64     -144   
16     16     
64     -32    
48     48     
336    320    
-592   192    
96     -304   
64     -336   
64     256    
160    160    
-64    -1088  
96     112    
-192   -144   
112    48     
-16    16     
-48    144    
-16    304    
-48    -80    
-176   -80    
80     -224   
-736   -96    
96     -352   
-64    16     
32     -128   
16     96     
128    -80    
32     16     
0      -16    
-48    -80    
-304   -464   
96     -208   
-80    0      
64     128    
-336   -32    
96     -16    
16     -48    
96     -32    
288    464    
0      160    
32     192    
-80    144    
64     -144   
16     16     
48     64     
-48    16     
192    -16    
-192   96     
208    -112   
-160   176    
224    32     
-32    96     
64     -48    
48     128    
-64    -240   
0      80     
-304   16     
-96    32     
-64    128    
192    176    
-192   16     
16     -176   
-208   -224   
208    -192   
-64    192    
144    -112   
-96    96     
-144   -208   
-64    -224   
-816   -656   
32     -176   
80     80     
-80    32     
64     -80    
-416   -224   
112    -256   
16     -80    
-16    -176   
192    -48    
-48    432    
-272   -352   
-160   -128   
-240   -192   
-32    96     
528    560    
-656   -272   
-64    128    
144    48     
-80    320    
-224   624    
32     -48    
-272   -256   
-48    208    
32     128    
-160   -256   
-80    32     
0      32     
368    320    
-80    352    
-80    128    
-32    -512   
144    112    
80     80     
128    176    
-16    80     
-192   -112   
128    112    
-32    80     
-608   48     
-192   304    
-80    -192   
-16    -64    
-64    -64    
64     96     
-16    -96    
-176   -480   
-112   -224   
288    112    
-304   -384   
-32    -64    
32     48     
-64    80     
-128   128    
272    384    
-336   384    
160    224    
-272   352    
-16    -128   
64     -64    
160    -32    
-192   -80    
-64    64     
48     112    
-16    128    
-144   64     
48     144    
-192   80     
0      352    
-224   176    
-64    512    
-384   64     
-96    0      
32     -176   
-32    64     
-272   80     
96     0      
144    96     
-176   64     
-112   256    
32     -16    
-16    64     
-16    64     
-48    160    
0      16     
-16    96     
-656   -80    
64     96     
144    112    
-112   80     
96     80     
-96    0      
-32    80     
32     0      
32     32     
160    176    
-192   128    
80     128    
-64    -16    
-192   -48    
64     128    
32     0      
112    80     
96     128    
-16    16     
-128   -48    
48     -176   
0      96     
112    96     
-272   -80    
80     32     
-16    64     
64     -32    
-16    144    
-112   32     
128    240    
-64    32     
32     96     
80     48     
-144   -112   
32     144    
16     32     
-32    -32    
48     0      
16     16     
-96    -80    
0      -16    
-160   -160   
176    112    
-416   -224   
240    48     
-160   0      
-160   48     
160    272    
-336   16     
336    192    
-304   112    
256    48     
-384   -64    
192    144    
-16    0      
-48    64     
80     96     
-48    64     
-160   -368   
272    -32    
-112   48     
-208   0      
160    96     
96     0      
-64    288    
80     -16    
-80    48     
64     16     
0      112    
32     16     
64     128    
48     16     
-16    208    
-80    32     
-48    16     
16     112    
-144   -64    
80     144    
64     80     
-112   48     
-96    0      
352    224    
-256   -32    
-128   0      
320    0      
-128   112    
0      96     
32     96     
-32    -32    
-112   -64    
320    0      
-96    128    
-96    288    
272    32     
-64    -32    
96     -16    
16     16     
-32    -16    
64     -16    
-16    32     
-112   32     
112    224    
-80    288    
48     96     
112    -48    
0      0      
224    32     
-48    144    
272    368    
-240   160    
-64    0      
96     80     
112    32     
48     32     
-144   16     
224    96     
-96    32     
144    160    
-64    -64    
-176   -432   
288    -48    
64     144    
-64    16     
96     112    
16     128    
-16    96     
32     32     
-96    -16    
192    16     
16     144    
-80    48     
32     176    
160    368    
80     -16    
112    48     
0      -16    
32     64     
-16    144    
144    176    
-32    112    
64     -48    
-112   80     
416    528    
160    224    
-48    32     
64     32     
32     48     
96     592    
64     192    
48     -192   
192    48     
0      -784   
160    192    
-16    32     
32     96     
80     64     
64     128    
-48    0      
96     400    
-16    -288   
64     80     
48     0      
-32    -256   
208    -48    
-160   -160   
496    -240   
0      -2384  
176    112    
-208   0      
256    144    
128    -80    
96     -96    
16     176    
96     176    
-224   64     
144    208    
-16    48     
16     -80    
-64    -32    
-32    -256   
208    80     
-48    -768   
128    224    
160    -1136  
-48    16     
-48    -208   
160    96     
-160   -160   
0      0      
96     48     
96     128    
-112   192    
272    352    
-80    624    
272    400    
-32    112    
224    32     
-160   0      
16     -976   
-32    -16    
-176   -592   
128    240    
-16    32     
16     128    
144    64     
16     96     
96     48     
96     -512   
240    208    
32     288    
80     112    
192    -144   
64     -368   
64     48     
-64    -416   
128    -368   
272    784    
-192   -240   
32     -128   
64     336    
64     -144   
-160   -208   
176    -48    
48     144    
-16    -176   
32     48     
128    -96    
48     208    
160    160    
-144   496    
144    -112   
-112   208    
208    -160   
-64    64     
304    240    
-272   -128   
208    112    
96     -112   
16     80     
32     -224   
-48    80     
272    48     
-112   96     
128    32     
48     32     
48     32     
288    -976   
-176   16     
32     -896   
-64    -1200  
0      -208   
208    -496   
32     -112   
-80    -624   
-48    -368   
32     64     
-96    -368   
128    48     
32     96     
160    -384   
-128   -32    
112    -256   
-224   -112   
176    -160   
96     16     
0      -80    
80     -144   
32     0      
208    -208   
-16    -112   
64     -96    
-48    -176   
32     80     
-144   -112   
96     -208   
32     128    
160    -32    
-176   96     
-112   -288   
176    -256   
-656   304    
144    112    
80     144    
176    -112   
-32    -112   
48     -800   
64     -64    
-112   0      
240    208    
80     224    
-112   -368   
48     -144   
176    176    
-208   -32    
80     -160   
-256   0      
240    48     
-64    32     
176    -16    
-16    320    
-32    -1552  
-64    -592   
-96    128    
32     48     
80     208    
112    256    
80     80     
96     -224   
-256   -80    
-96    -560   
288    -320   
-128   16     
-544   -352   
176    192    
-224   -192   
96     176    
48     -256   
256    -352   
-160   144    
-32    -640   
128    208    
-48    48     
144    -96    
32     160    
144    -32    
-208   160    
48     -112   
-720   -256   
128    -128   
176    544    
16     288    
-160   112    
-16    -576   
16     96     
-48    -144   
48     0      
-16    144    
112    64     
-208   -96    
192    128    
-272   -64    
-352   -480   
-304   -192   
-80    16     
-1088  0      
112    128    
240    112    
32     -224   
-192   -208   
352    96     
-16    192    
-64    32     
-16    -16    
32     48     
16     0      
-256   -208   
208    80     
-192   144    
176    48     
-416   -224   
-368   -64    
80     -192   
-128   -112   
80     160    
176    -112   
-432   16     
32     96     
-560   48     
160    16     
-176   48     
176    -16    
-96    64     
16     -64    
-64    -48    
-48    -16    
192    -32    
-64    256    
112    16     
-144   16     
192    -592   
240    48     
-480   160    
208    -32    
-240   48     
336    -64    
-128   -96    
432    -288   
96     -80    
112    0      
352    208    
-144   -144   
160    176    
-1536  -160   
-16    -48    
-96    -80    
0      96     
-16    0      
-208   272    
-48    0      
48     16     
-128   -48    
144    48     
-128   32     
-416   -16    
96     112    
48     -64    
16     -32    
-176   -64    
112    128    
-64    48     
16     64     
-16    -32    
-192   48     
0      48     
-1440  -48    
-80    -16    
32     -32    
80     176    
-208   64     
160    -48    
-368   -160   
192    112    
-80    -64    
-32    0      
-64    64     
-32    256    
48     176    
-384   128    
80     64     
-480   -32    
208    96     
-1328  0      
64     -16    
-176   -144   
80     80     
16     -48    
-32    80     
144    96     
-384   -208   
336    -176   
-192   128    
96     -16    
-16    48     
64     112    
-144   96     
208    208    
-400   64     
0      -48    
-16    48     
144    48     
-112   -224   
112    176    
176    80     
-208   32     
160    144    
-144   -32    
240    112    
16     64     
64     -112   
-192   -208   
64     96     
-416   32     
-64    48     
-544   64     
144    128    
-208   -288   
64     -80    
32     48     
-80    -16    
-128   16     
160    16     
-48    128    
-80    -16    
-96    48     
-128   -96    
176    -32    
-208   0      
48     32     
-320   -80    
320    224    
-320   -128   
-16    48     
16     64     
-80    64     
160    224    
64     96     
-64    48     
-32    64     
-240   384    
352    96     
-144   -160   
32     -16    
48     80     
-416   -48    
336    176    
-96    64     
-192   16     
144    16     
-144   -96    
96     80     
-176   64     
48     16     
-64    -64    
96     208    
80     144    
-144   32     
-144   -16    
-192   -96    
-192   -128   
112    160    
80     48     
16     80     
-96    80     
-32    64     
-16    288    
48     64     
48     48     
-32    96     
64     -64    
-16    -16    
-32    80     
-16    -96    
-64    32     
128    16     
32     -96    
-64    0      
144    288    
-144   -16    
32     0      
272    432    
-128   272    
-352   -752   
-112   -256   
288    96     
-256   -320   
368    144    
-256   128    
128    80     
-144   352    
192    704    
144    336    
-64    -32    
128    128    
-32    -80    
-160   32     
176    32     
48     240    
-96    16     
-80    144    
336    208    
160    160    
-80    96     
112    128    
-32    32     
-224   -256   
208    128    
192    304    
64     256    
-176   80     
-368   -320   
-112   -128   
64     -48    
64     -48    
0      64     
-160   32     
96     -144   
-240   -416   
224    -384   
-192   -208   
240    80     
-16    -64    
32     -64    
48     192    
160    176    
160    336    
-240   -80    
288    0      
112    208    
96     -16    
-64    0      
288    272    
-160   80     
96     -32    
-208   -304   
32     368    
-144   -160   
-144   160    
16     192    
-16    64     
64     320    
-96    -32    
192    528    
-288   -176   
208    -160   
-32    96     
-16    48     
32     -96    
0      32     
112    80     
-48    96     
32     32     
32     64     
64     160    
0      144    
-48    -32    
48     -112   
176    160    
-160   32     
-80    -368   
16     544    
176    224    
-64    -128   
64     -608   
192    16     
-32    288    
16     208    
272    528    
80     176    
-96    112    
64     -432   
-192   -64    
320    336    
-256   160    
384    64     
-96    -32    
-16    32     
240    128    
16     592    
144    -128   
-96    -160   
64     144    
-16    -96    
192    64     
-176   128    
128    64     
-48    80     
128    96     
32     -16    
-48    80     
80     48     
-64    -304   
80     96     
-112   -384   
480    416    
-192   -752   
-160   -288   
288    -400   
-32    192    
176    112    
-48    -32    
0      -128   
80     -192   
-32    -64    
48     -160   
-32    -240   
160    96     
-48    400    
96     -160   
160    432    
-16    -496   
48     0      
96     240    
32     -32    
-144   -176   
80     -96    
-96    -112   
112    16     
-64    80     
96     112    
112    -112   
192    160    
-16    32     
96     -192   
48     -688   
-80    -464   
464    416    
-224   448    
272    112    
-560   -880   
528    720    
-160   624    
176    -48    
-96    16     
96     64     
-80    48     
192    -240   
-144   -128   
112    -160   
128    -48    
-32    -704   
48     96     
-32    -432   
32     -208   
96     48     
64     128    
-48    -240   
16     -48    
16     -192   
-32    176    
128    144    
-96    -144   
-128   -176   
64     -48    
0      80     
16     -192   
-112   -416   
0      288    
192    16     
16     0      
32     352    
64     224    
80     32     
112    32     
224    96     
-176   0      
208    -80    
-96    -144   
512    -64    
-160   192    
96     -16    
-80    64     
224    0      
96     48     
-96    32     
64     208    
-192   16     
576    192    
-176   160    
80     -144   
192    32     
48     -64    
112    144    
-96    -224   
112    16     
112    -144   
-144   32     
112    -240   
128    -288   
32     -48    
0      -400   
32     -160   
-32    -592   
16     -448   
80     -16    
-32    -256   
80     32     
-80    352    
-96    -240   
80     96     
240    -32    
0      -64    
-32    0      
64     -736   
112    -176   
112    -208   
80     96     
-512   -80    
-256   -320   
192    128    
16     -64    
320    48     
-192   -816   
48     0      
-32    -144   
144    128    
464    80     
-432   -80    
144    -16    
32     176    
112    48     
-32    48     
-160   0      
128    16     
-656   -96    
48     -240   
64     -96    
48     -112   
-32    192    
144    -976   
48     -176   
352    -304   
-144   -128   
416    32     
144    -64    
64     -128   
112    -64    
0      160    
80     -112   
-432   48     
64     64     
64     -32    
0      -48    
-80    -48    
-80    -176   
16     -160   
80     -256   
128    -16    
64     32     
96     208    
-256   -112   
112    -48    
0      -80    
112    80     
128    112    
80     48     
-112   -144   
-32    -64    
144    -16    
-208   0      
176    32     
-48    -224   
48     80     
48     -160   
-48    112    
224    192    
-336   32     
-80    64     
288    -48    
-400   -48    
48     -176   
-704   -64    
80     -48    
-416   16     
224    192    
208    -64    
-432   -1200  
432    96     
-16    -16    
160    -80    
-176   80     
160    -80    
-16    0      
-48    16     
-16    -48    
176    160    
-720   16     
32     -128   
96     -32    
64     16     
32     64     
0      -208   
272    112    
-144   -544   
96     -240   
-64    128    
144    -176   
-160   -128   
80     -32    
-16    -16    
32     -16    
48     -48    
112    -192   
-112   -224   
224    -272   
336    272    
-336   48     
32     48     
-112   128    
176    -48    
-304   -32    
64     -96    
-288   -304   
48     0      
16     -16    
-128   -48    
-128   -160   
0      112    
-96    96     
-48    -288   
48     32     
80     -144   
16     112    
-160   0      
-16    -112   
128    -32    
16     96     
-96    0      
112    48     
-64    48     
-32    -160   
-128   -64    
48     -208   
-96    64     
-304   -48    
-64    64     
-528   -176   
-208   -64    
144    48     
-464   0      
-80    0      
-208   -96    
-64    16     
-48    208    
112    112    
0      -48    
96     112    
-224   -16    
-368   -704   
160    -384   
-80    128    
-448   -208   
128    -304   
-96    -224   
224    400    
48     -160   
-176   -288   
96     -96    
-1680  -144   
96     80     
32     160    
-32    224    
-112   48     
-32    224    
-96    -208   
80     176    
-176   32     
-80    -144   
80     192    
48     240    
-240   -192   
112    128    
-96    -112   
-96    0      
208    528    
-176   -48    
-48    192    
64     -704   
-16    -96    
144    192    
-16    -16    
32     112    
0      32     
-96    -112   
-192   -176   
320    -32    
-80    112    
48     48     
32     -16    
16     -64    
-272   544    
192    128    
-272   -496   
160    160    
32     320    
80     -368   
-160   -208   
32     352    
-32    -96    
-16    -112   
0      48     
128    16     
-32    -512   
96     464    
-256   -496   
-368   48     
-96    256    
-64    16     
-96    96     
-112   64     
112    -144   
-240   576    
208    -544   
-144   672    
336    240    
-192   -192   
-160   32     
-32    -64    
16     16     
16     16     
144    192    
112    448    
-416   -208   
256    -128   
-176   112    
336    368    
-112   128    
144    -256   
272    32     
-224   320    
-96    -368   
320    80     
0      288    
112    128    
80     432    
-368   -80    
144    -480   
-688   528    
-64    224    
32     -64    
-48    -16    
160    -224   
16     208    
224    -32    
-352   48     
240    32     
-144   48     
96     48     
-48    0      
-48    -256   
-352   -432   
80     192    
-304   320    
-144   176    
144    -272   
16     624    
64     176    
-272   -400   
64     16     
80     64     
-48    304    
144    -16    
-160   -272   
-16    -64    
176    -128   
-96    288    
48     160    
-176   -128   
96     -48    
-16    -64    
336    400    
-352   -16    
64     112    
-144   64     
128    -416   
80     624    
-32    272    
64     16     
-80    -96    
-16    48     
-272   48     
352    64     
48     32     
-48    -48    
-48    96     
32     16     
0      32     
16     48     
16     96     
192    144    
-48    224    
-240   -112   
128    224    
-272   -448   
0      -64    
272    928    
-32    528    
-272   -768   
400    -80    
-80    928    
-48    -176   
80     112    
112    48     
-32    -144   
-112   -304   
176    208    
-128   80     
112    -144   
-16    240    
160    -224   
-144   16     
272    -80    
0      288    
-144   208    
80     -16    
-80    176    
-80    80     
0      96     
-64    304    
112    128    
-208   -384   
-144   0      
224    336    
-144   192    
16     -288   
48     -352   
-80    -32    
384    176    
-128   0      
48     80     
48     256    
-192   -96    
112    96     
208    240    
-112   384    
-32    304    
32     80     
0      0      
64     -112   
-208   -112   
128    -32    
-304   128    
80     -32    
128    -16    
16     -16    
-16    48     
64     96     
32     80     
-48    -16    
0      -16    
-48    128    
48     48     
-112   304    
240    0      
0      48     
96     -48    
-16    -176   
-96    0      
16     112    
64     64     
32     -64    
80     32     
-48    48     
176    0      
64     -32    
-144   96     
352    0      
-144   80     
192    32     
-16    -32    
144    144    
-176   -1328  
144    112    
-192   -144   
368    48     
-144   304    
48     48     
48     112    
0      0      
80     -112   
-32    32     
-80    -176   
128    48     
320    528    
-224   320    
112    384    
32     -416   
48     -16    
256    128    
144    80     
-16    112    
-96    144    
-48    -64    
-64    -32    
-160   0      
96     240    
112    32     
-64    48     
112    0      
32     -64    
0      -80    
336    32     
-112   64     
-144   -1056  
80     -16    
-176   -32    
48     96     
-80    112    
0      128    
-112   64     
-64    368    
-128   224    
-256   -64    
16     320    
-160   16     
-16    -112   
0      -64    
144    208    
16     -672   
-16    208    
320    -96    
-32    48     
-96    -48    
256    192    
-128   128    
-96    144    
64     -32    
336    -160   
-32    0      
96     -240   
32     80     
112    -336   
112    112    
256    -128   
-112   64     
48     -112   
272    112    
0      0      
112    64     
-16    16     
144    16     
96     -96    
288    144    
-80    48     
0      -112   
128    128    
160    -32    
112    32     
-32    -16    
-16    16     
96     -16    
-48    -112   
144    16     
160    96     
-176   -80    
144    176    
48     64     
-96    -544   
64     112    
80     -112   
240    112    
-176   -160   
48     80     
112    -224   
-64    32     
112    -368   
-48    80     
64     64     
112    32     
-64    32     
48     -80    
64     -752   
-160   -528   
272    0      
16     48     
112    80     
-96    -176   
64     32     
64     -16    
-16    64     
144    144    
64     -912   
0      -48    
32     -240   
192    80     
-608   48     
64     -304   
-32    32     
128    32     
-64    -16    
144    -32    
0      -288   
32     -48    
48     80     
-64    160    
80     32     
144    -144   
-80    64     
-176   -272   
128    -96    
-160   96     
0      -240   
96     80     
-48    -128   
32     32     
32     -464   
48     -128   
128    128    
-128   -16    
160    -288   
208    -160   
112    -192   
-64    64     
256    80     
-80    160    
-288   -160   
144    -800   
144    -144   
-160   -256   
160    -16    
-16    32     
-16    64     
160    -32    
176    128    
-32    112    
96     -48    
-48    -240   
208    32     
-80    160    
144    -144   
-416   -112   
96     -112   
-176   -432   
288    -336   
112    224    
112    64     
32     -48    
208    -640   
-144   -16    
112    -64    
-32    336    
0      -16    
96     144    
-240   -400   
48     -496   
-96    416    
-336   -592   
48     96     
32     752    
80     -352   
448    64     
-528   -352   
176    -608   
-144   16     
144    48     
32     48     
80     16     
48     96     
-320   -576   
352    128    
-208   544    
-80    -144   
176    -704   
64     400    
-368   -64    
32     -208   
160    128    
112    -208   
128    688    
96     -448   
-80    16     
32     176    
-336   -272   
64     336    
-16    -48    
0      144    
48     -96    
-208   -176   
208    64     
-112   -112   
112    0      
-48    -64    
112    -160   
192    96     
144    -416   
176    272    
-144   48     
144    592    
272    16     
160    -256   
-288   -304   
128    -400   
-384   -240   
-96    -384   
-128   96     
16     432    
48     128    
-16    -336   
208    32     
-32    -176   
-112   96     
208    16     
-112   160    
112    240    
-96    336    
-320   -224   
16     -192   
-240   -288   
128    -80    
144    560    
64     -16    
-208   -272   
-224   -768   
432    288    
-880   -112   
-1008  0      
-160   352    
-1232  -368   
-368   0      
448    -192   
128    720    
-112   -96    
-240   -272   
480    -80    
-352   144    
-320   -96    
112    144    
-192   80     
-160   0      
-128   -256   
-464   0      
-368   -400   
-304   416    
-160   48     
-560   -48    
-80    240    
-160   -208   
-128   0      
-112   -208   
48     160    
-272   -112   
112    48     
-336   -32    
-32    16     
0      32     
-144   -16    
48     208    
-128   -256   
224    448    
-336   144    
-16    -64    
-1824  -1488  
480    736    
-688   -80    
480    -288   
-176   560    
176    -208   
400    560    
-656   48     
304    -384   
-144   160    
-16    432    
352    272    
-336   -144   
64     48     
-80    -224   
-352   -48    
-176   80     
32     -448   
80     368    
-48    16     
144    288    
-96    -64    
16     -80    
0      64     
-64    -288   
-64    -96    
-160   256    
320    48     
-64    -32    
-96    0      
-208   32     
32     48     
-1232  -80    
16     32     
-80    -160   
-96    -416   
-48    208    
192    368    
-384   -32    
432    352    
-176   112    
-304   -496   
32     -208   
144    -80    
-128   -192   
192    272    
-48    192    
-320   -304   
-128   -272   
48     -144   
0      -208   
32     -96    
32     0      
-128   64     
16     32     
16     -64    
16     -96    
96     -48    
32     16     
-96    256    
-192   -48    
-16    32     
-32    0      
-16    80     
48     -160   
32     -800   
96     16     
-64    -96    
-192   -16    
320    112    
-368   64     
48     112    
-112   48     
112    16     
-160   -32    
-128   -80    
-32    112    
0      -16    
48     64     
-496   -112   
-240   208    
416    48     
-224   96     
112    96     
-112   32     
0      48     
16     -64    
160    240    
144    240    
-96    -112   
272    -272   
-208   48     
16     -64    
-176   -80    
128    -192   
-32    16     
112    176    
16     256    
-48    64     
-48    0      
-32    32     
96     80     
80     144    
-96    112    
-48    96     
-16    64     
-16    112    
-80    48     
176    224    
-112   16     
240    160    
-96    16     
32     176    
144    144    
-32    16     
368    320    
-224   144    
-112   208    
32     176    
-48    144    
-192   -160   
16     112    
80     96     
-16    -16    
48     -32    
240    160    
-240   32     
176    240    
-176   336    
-48    208    
80     608    
96     -224   
-224   -512   
-320   -240   
320    144    
-64    80     
16     -176   
128    -256   
208    64     
224    128    
176    144    
192    80     
192    -48    
64     -96    
112    144    
16     80     
128    144    
-160   -192   
-16    -96    
-160   144    
16     48     
32     384    
224    128    
-16    -48    
-48    -16    
192    64     
-160   -48    
112    32     
224    144    
-192   -48    
-512   16     
272    -64    
16     32     
64     64     
-96    80     
96     112    
-16    64     
-96    96     
160    80     
-32    -80    
176    80     
-16    208    
32     80     
48     32     
-80    -48    
336    144    
-16    64     
64     48     
16     80     
192    80     
-128   32     
96     112    
176    80     
-96    16     
96     16     
80     -144   
48     0      
272    176    
96     -272   
-128   32     
64     144    
-160   80     
96     80     
-32    -48    
80     112    
-80    -32    
-16    -96    
16     64     
-16    -16    
-48    -48    
16     16     
-48    112    
16     64     
-128   96     
-64    -16    
160    80     
0      16     
16     128    
-64    -64    
-32    32     
80     96     
16     -336   
80     80     
-16    -2224  
96     64     
-112   64     
80     0      
192    144    
-128   80     
112    32     
32     80     
16     -16    
112    112    
96     0      
-96    -64    
160    32     
-80    -384   
112    48     
-80    -192   
96     128    
96     144    
336    272    
-352   240    
448    320    
-256   -400   
112    32     
112    -48    
-224   -112   
128    48     
208    160    
0      400    
128    96     
16     144    
-48    -160   
192    64     
-32    -1552  
0      272    
64     -16    
112    -80    
-48    -80    
80     144    
128    48     
80     160    
-112   -160   
144    -48    
-48    256    
48     -304   
176    48     
64     -320   
-288   -656   
208    -400   
-176   -304   
176    -192   
-224   480    
192    320    
0      416    
-48    -176   
0      -192   
160    32     
-112   176    
128    -16    
144    192    
16     224    
96     -160   
-16    48     
240    -240   
16     80     
-16    -496   
160    192    
64     48     
96     160    
80     -48    
16     80     
128    96     
80     160    
-48    -32    
0      -832   
128    -80    
-32    128    
240    304    
-16    32     
128    144    
-32    -96    
32     48     
224    32     
-272   -128   
256    -96    
-368   -32    
0      80     
-32    -304   
96     96     
112    -32    
-112   128    
96     528    
368    304    
-32    -176   
608    336    
-304   448    
32     576    
80     208    
-112   -112   
208    -48    
-80    112    
352    -1776  
-128   -32    
16     -160   
144    -112   
-32    224    
256    48     
80     240    
-80    32     
-64    -848   
144    48     
480    144    
-144   144    
-240   -432   
-32    -128   
-224   -384   
144    -1024  
-32    -304   
48     -176   
272    -128   
128    -848   
-144   112    
384    -112   
-144   -336   
80     -304   
208    272    
240    -48    
-256   -32    
-48    96     
272    -208   
-992   128    
144    -208   
-192   16     
272    -288   
-48    16     
-80    -160   
-48    240    
48     -96    
-48    48     
-240   -112   
304    -176   
-144   144    
32     -416   
256    48     
-96    496    
352    528    
-32    -96    
-128   -96    
32     -112   
-80    -256   
16     -512   
48     -224   
-64    -176   
-304   -240   
-304   -640   
-320   -1072  
688    1168   
-544   0      
128    -640   
64     384    
0      -192   
-64    192    
-16    144    
80     -304   
-32    608    
-16    -448   
-96    -288   
-128   -1040  
0      144    
48     272    
80     -272   
-112   -368   
64     144    
64     480    
32     -64    
-160   64     
96     0      
-336   -16    
272    192    
-288   64     
160    -128   
48     0      
208    48     
112    0      
-128   -1056  
288    544    
144    464    
-80    -112   
-48    -208   
176    -208   
-16    -80    
368    352    
-368   448    
176    64     
-192   80     
144    -16    
-128   -352   
48     -336   
224    16     
-64    -224   
224    112    
-272   -80    
128    16     
-208   -368   
144    -112   
-240   -96    
32     -48    
-240   -112   
16     -176   
-256   96     
-112   80     
48     128    
240    224    
-64    224    
176    -112   
-208   -128   
-96    96     
-32    144    
-16    32     
48     -224   
-272   -160   
288    96     
-208   96     
176    48     
-16    -32    
-48    -64    
160    112    
80     -256   
0      96     
-64    -272   
352    208    
-160   288    
64     80     
-16    0      
16     -48    
-48    176    
240    0      
-160   80     
112    -32    
-240   80     
144    -144   
240    416    
-1104  -48    
-80    112    
80     -128   
-560   48     
-176   96     
-1520  -128   
-80    -16    
16     -128   
-32    144    
0      -48    
160    48     
-80    16     
96     16     
-832   -224   
208    64     
-176   -112   
96     112    
-32    -16    
-128   16     
-112   -16    
64     96     
-48    -32    
-256   -272   
0      -80    
80     -80    
-224   -80    
-768   -176   
-32    16     
48     -32    
-128   16     
-16    -304   
-112   -48    
-128   160    
-144   -32    
-32    16     
48     32     
-64    128    
96     0      
-128   208    
-1920  64     
-240   0      
112    -16    
48     128    
224    160    
-144   208    
96     16     
-176   -32    
-176   -64    
160    144    
-80    -176   
-80    -128   
64     -32    
-32    96     
64     80     
-160   32     
112    48     
48     -48    
144    112    
-304   -272   
64     -96    
32     128    
160    272    
-112   80     
80     32     
-16    0      
48     -48    
0      -48    
16     -64    
160    160    
-272   80     
272    384    
-992   -96    
432    352    
-400   160    
48     16     
-112   0      
128    32     
-160   112    
-80    -48    
16     -32    
0      -208   
-48    -16    
-32    -16    
192    240    
-336   32     
64     0      
-688   -128   
16     128    
-128   -128   
64     16     
128    160    
-272   -112   
208    192    
-240   0      
96     16     
32     80     
48     -16    
0      128    
32     32     
-256   -192   
208    80     
-144   -128   
80     64     
80     -48    
80     48     
32     48     
-144   0      
-80    0      
176    80     
112    96     
-48    48     
-80    -16    
-80    -64    
96     -112   
-48    16     
208    112    
-128   32     
-16    96     
192    288    
-48    -48    
32     0      
96     80     
144    48     
-64    32     
112    80     
-16    -32    
-48    48     
32     80     
-64    64     
-32    80     
-48    -32    
-128   -128   
272    240    
32     48     
0      80     
16     80     
48     48     
48     192    
160    -64    
-192   32     
0      48     
-32    64     
-32    16     
160    192    
-448   -128   
64     -224   
32     -80    
144    48     
-80    -112   
16     96     
128    32     
144    48     
-208   0      
16     32     
0      64     
96     96     
-16    -48    
-80    -64    
-32    -80    
-160   -112   
0      -160   
16     640    
144    400    
-352   -1056  
224    304    
-160   480    
112    -368   
-32    144    
112    80     
80     96     
-16    80     
64     64     
-96    -64    
96     144    
-96    48     
16     80     
16     48     
144    832    
16     -640   
-208   -144   
112    912    
0      -496   
-16    240    
-48    -144   
64     48     
-112   80     
-32    144    
-112   144    
0      -176   
-112   176    
112    16     
-48    16     
160    560    
-160   0      
112    -128   
16     128    
64     64     
128    224    
0      -16    
48     0      
-96    -80    
240    400    
-96    240    
32     -432   
-128   -96    
0      -432   
32     -80    
80     96     
176    64     
128    592    
48     208    
-64    192    
96     224    
-192   -112   
-208   -240   
128    -128   
-32    80     
-16    0      
0      112    
-32    -64    
0      -512   
32     80     
160    192    
144    64     
-16    32     
-32    0      
48     48     
-32    80     
48     80     
-16    -16    
176    144    
-32    288    
320    0      
-32    224    
96     32     
32     -480   
96     32     
112    64     
-208   -176   
-336   -432   
416    -240   
-160   -96    
192    112    
256    80     
128    256    
-64    304    
240    160    
96     288    
-592   32     
-144   -16    
-32    -96    
240    96     
192    -896   
-32    208    
304    -32    
-64    160    
96     80     
304    208    
224    48     
-32    -64    
112    -128   
144    -176   
48     -208   
-48    16     
192    112    
-64    -240   
64     64     
160    -448   
48     208    
-368   -64    
624    80     
-352   -256   
112    48     
-288   -64    
64     32     
16     -160   
16     160    
144    112    
0      320    
-112   -112   
48     -176   
224    -464   
0      -80    
-32    16     
32     -2544  
64     112    
-96    240    
-48    -288   
-224   -176   
224    80     
-208   -352   
256    192    
192    608    
-32    16     
192    -192   
-112   -304   
32     96     
176    -192   
-16    544    
384    544    
32     256    
-176   96     
64     -320   
-112   -304   
48     -80    
16     -80    
48     224    
-64    224    
-96    144    
256    0      
-128   -1008  
16     -400   
64     -640   
-32    64     
48     -256   
-96    -224   
256    -128   
160    32     
48     -16    
96     48     
80     -112   
0      0      
0      416    
128    144    
-80    48     
96     -96    
48     144    
192    -128   
-176   16     
-144   -224   
80     -176   
192    -128   
96     240    
0      0      
-80    80     
272    256    
-160   80     
144    304    
304    -144   
-48    176    
160    240    
160    128    
-16    -64    
144    128    
80     -48    
0      32     
16     80     
-128   32     
96     64     
96     16     
208    -96    
0      -192   
-64    -752   
160    -80    
-96    -368   
176    -48    
-64    80     
-48    -112   
160    128    
0      -128   
48     0      
-16    240    
336    -368   
-208   16     
-688   -144   
48     -112   
-176   -176   
336    208    
-304   -16    
144    48     
384    -16    
-400   288    
240    -224   
-224   160    
224    32     
-112   -16    
0      112    
128    0      
96     112    
-192   -96    
80     -192   
-560   32     
0      -176   
80     48     
64     -512   
112    -32    
0      -768   
80     0      
0      160    
48     112    
160    160    
-304   16     
112    0      
48     16     
-176   -64    
32     48     
-368   -144   
64     -304   
112    -16    
176    -64    
-96    -80    
112    -432   
80     -32    
64     -560   
112    32     
32     -64    
128    128    
-16    -144   
256    -80    
-48    64     
48     32     
-64    32     
-48    32     
-304   -48    
96     16     
112    0      
112    -64    
-16    32     
-32    -224   
400    352    
-96    208    
16     272    
96     0      
32     64     
32     -112   
-64    48     
96     176    
-112   32     
-32    -32    
112    -16    
-208   -112   
48     -432   
0      16     
176    -208   
144    96     
16     80     
48     160    
-80    0      
64     -224   
-160   -176   
64     -32    
-112   48     
-16    -32    
-224   -64    
16     -176   
-880   -144   
-32    -416   
144    112    
-48    -304   
144    128    
112    -816   
160    -192   
-32    32     
144    -32    
-272   -48    
112    112    
-128   144    
-96    64     
0      64     
128    96     
32     -48    
-176   -16    
192    80     
-144   -80    
112    64     
80     -480   
-160   0      
-80    -16    
176    16     
-208   -16    
352    -144   
-128   32     
48     -80    
-80    0      
80     -32    
0      368    
48     -48    
-80    -16    
384    -64    
-208   -144   
80     -112   
0      80     
0      -64    
-48    -96    
-80    0      
80     -48    
-208   -48    
96     0      
240    64     
64     112    
-208   48     
-432   -208   
48     112    
-640   -176   
64     16     
-48    96     
-336   -16    
-96    48     
144    64     
-272   -64    
96     -176   
0      32     
368    96     
-16    224    
-864   -176   
352    256    
-656   -48    
-64    144    
-208   -80    
-144   64     
16     -64    
-208   -176   
112    256    
-288   -64    
-128   -16    
-224   -256   
144    48     
-16    32     
-288   -144   
-112   -160   
208    64     
16     32     
-48    112    
16     48     
-16    32     
-64    240    
-176   128    
144    64     
-304   -96    
48     -16    
-144   -32    
80     48     
-1808  16     
-160   48     
0      192    
160    64     
-192   16     
-16    240    
32     144    
0      208    
352    464    
-224   336    
80     -480   
-32    320    
64     224    
-16    32     
-32    0      
-112   48     
-144   272    
80     -368   
-16    144    
-16    -64    
16     160    
0      16     
16     96     
96     -16    
-64    288    
-64    32     
352    368    
-368   -496   
-16    -400   
112    368    
-48    192    
-256   -48    
-1168  -128   
-288   128    
0      -144   
16     64     
-16    32     
-32    48     
16     64     
-64    32     
-16    0      
-48    48     
192    128    
-240   128    
-96    96     
-16    -80    
-64    16     
-1120  -64    
48     0      
0      -64    
80     -32    
16     160    
144    496    
-112   144    
-64    -224   
32     96     
32     -48    
96     80     
-64    32     
-128   112    
-160   -128   
-32    144    
32     -16    
-48    96     
64     96     
-64    -112   
-64    32     
48     32     
-32    -16    
64     -16    
64     48     
32     96     
-48    80     
-32    320    
64     -64    
-272   -640   
-352   -832   
64     -368   
-96    -256   
-352   -496   
128    -128   
-112   96     
80     144    
0      208    
-32    64     
-256   -96    
144    -144   
-16    -16    
-208   -112   
64     48     
-144   -16    
208    80     
-544   -96    
48     64     
112    128    
80     784    
272    688    
16     -16    
16     16     
-64    0      
-128   64     
48     48     
-48    192    
32     112    
144    96     
-96    -32    
-144   -128   
192    -528   
-32    160    
176    368    
96     176    
-224   -384   
-48    -576   
176    64     
-320   352    
-256   -128   
208    240    
-48    320    
-144   -80    
0      128    
-224   0      
144    304    
-128   -192   
208    368    
-64    32     
-64    112    
192    0      
-336   -912   
-112   -64    
240    560    
-256   -128   
-32    -128   
192    448    
-256   -192   
-160   -576   
-224   -416   
224    128    
-32    368    
-32    80     
192    192    
64     -16    
96     64     
432    224    
-96    208    
48     112    
-240   -528   
-32    -192   
96     -64    
-128   -64    
80     48     
0      -16    
80     144    
-128   0      
320    0      
64     32     
208    0      
80     112    
64     368    
48     96     
32     16     
224    208    
-320   -80    
-16    -16    
80     80     
176    -32    
-288   -304   
448    -1456  
64     224    
48     0      
-48    16     
208    64     
16     64     
-96    160    
32     0      
-144   -96    
16     -96    
0      -288   
176    208    
-80    -32    
-16    16     
176    144    
224    -864   
-240   128    
64     64     
-16    -16    
224    64     
-112   48     
96     96     
80     112    
16     -64    
0      -16    
64     160    
-32    32     
-16    112    
96     64     
64     -48    
80     0      
224    48     
64     80     
32     128    
-32    -96    
160    -48    
352    592    
-176   304    
-16    -16    
16     -48    
176    -96    
240    208    
-224   -32    
64     -160   
32     128    
48     -352   
112    128    
16     -1936  
-80    32     
144    112    
-112   16     
128    112    
0      16     
-16    32     
112    96     
0      64     
32     80     
64     224    
160    32     
64     144    
-16    -256   
336    96     
-16    -528   
-96    96     
80     -384   
-80    16     
96     -400   
96     16     
-272   64     
672    208    
-400   80     
288    96     
-128   96     
48     -80    
240    368    
-144   80     
-80    48     
64     -192   
-16    80     
128    -448   
-176   -48    
160    -464   
112    160    
0      48     
32     48     
-80    48     
256    -48    
-128   80     
-64    -144   
288    416    
64     -160   
-64    64     
288    -224   
32     128    
-32    -640   
-16    0      
48     -192   
128    192    
32     -96    
0      16     
160    160    
80     32     
-48    48     
192    -16    
48     96     
144    80     
-368   -64    
480    -288   
-80    64     
-336   -368   
400    -80    
80     160    
-32    80     
16     32     
64     80     
96     112    
192    -48    
-48    192    
-64    -96    
64     128    
224    -16    
-272   96     
192    -48    
-192   48     
208    -64    
128    96     
-96    -16    
112    112    
-176   16     
128    -304   
208    -816   
64     -32    
96     -240   
-16    -240   
288    96     
-16    -48    
-80    192    
32     16     
-256   -384   
288    -240   
64     -352   
-176   0      
64     -1248  
-64    80     
144    0      
-80    128    
32     -176   
128    -16    
96     -32    
-80    -704   
176    -48    
64     112    
112    64     
-48    -560   
-96    -112   
272    -192   
32     64     
48     -160   
48     144    
-80    32     
32     -112   
-192   -16    
64     -496   
80     -16    
112    -192   
16     32     
112    -16    
-128   -128   
96     128    
-400   -800   
80     -448   
304    160    
-16    160    
-16    -272   
-512   -288   
288    -256   
-672   80     
144    64     
-208   -112   
176    -240   
96     16     
-224   -304   
-16    -336   
0      64     
304    240    
208    16     
-144   -64    
64     -144   
16     -192   
-176   -240   
112    0      
224    144    
-96    80     
-16    -240   
128    -192   
160    0      
160    128    
-192   -48    
128    -272   
-160   528    
416    160    
-336   224    
0      96     
16     -32    
-16    0      
16     48     
-112   304    
-16    -80    
464    224    
64     -160   
64     320    
-80    -448   
112    -656   
144    -96    
16     -160   
-48    -80    
96     288    
-160   0      
-144   32     
0      -32    
-16    -96    
-80    -128   
16     -16    
-992   144    
96     -384   
208    -128   
32     -144   
-240   528    
304    -1648  
-96    80     
80     16     
-32    0      
-32    160    
128    -128   
-96    -144   
96     144    
-368   -608   
272    -112   
-176   96     
0      144    
-912   -208   
0      -192   
176    416    
16     -96    
384    368    
-96    448    
-32    -336   
128    -48    
-96    304    
-96    -144   
0      0      
-64    48     
96     -64    
-256   48     
208    -224   
-16    48     
128    0      
-64    -224   
0      -304   
352    96     
-624   384    
16     -288   
128    0      
-64    48     
112    16     
32     32     
-240   -80    
96     -176   
-304   0      
192    -32    
-336   0      
64     -96    
16     112    
-1632  -304   
480    240    
-464   304    
176    16     
-160   160    
176    -224   
-176   -32    
288    48     
-176   -112   
64     0      
-64    144    
-96    192    
176    240    
-1168  -48    
384    96     
-896   -480   
272    -336   
48     144    
-80    32     
64     48     
-624   -80    
0      32     
80     -16    
-16    80     
96     -176   
-80    -80    
64     176    
32     256    
64     -80    
80     48     
-144   -64    
-160   -80    
-176   -112   
-96    -272   
-96    -144   
-96    1120   
80     912    
-912   160    
-80    -176   
-128   -224   
-160   -32    
-288   -112   
32     -64    
0      -80    
192    384    
-272   32     
-16    0      
-112   32     
-64    48     
16     16     
-32    112    
80     64     
-32    0      
128    400    
-1808  528    
-208   176    
-304   -1344  
176    656    
48     464    
-176   -608   
256    656    
-160   64     
-48    -32    
192    752    
80     480    
-176   -176   
-16    -64    
-272   -144   
-16    -112   
-80    -144   
64     112    
96     16     
48     16     
-32    -64    
96     592    
-144   192    
32     -16    
-48    16     
64     96     
-64    0      
112    96     
-32    256    
-160   -16    
-192   -224   
96     0      
-128   144    
480    192    
80     176    
-224   -128   
16     16     
-16    16     
320    144    
-192   16     
272    272    
-768   -256   
96     -432   
-64    -240   
80     16     
0      144    
-96    0      
176    80     
-992   0      
224    240    
0      96     
-112   320    
480    -96    
-96    112    
304    96     
-304   -80    
160    112    
-80    48     
16     96     
-208   48     
464    48     
-224   144    
192    -16    
-480   -192   
256    80     
-128   -32    
-160   0      
128    64     
80     96     
-368   80     
128    -32    
112    320    
0      -48    
-112   16     
16     -80    
-64    96     
-240   -64    
0      0      
-96    160    
-96    144    
48     -16    
16     0      
-32    -144   
-32    64     
80     64     
-192   112    
64     112    
-304   80     
96     128    
-176   64     
-32    -64    
80     128    
48     128    
80     96     
16     32     
32     96     
32     48     
-32    0      
-80    48     
256    272    
-144   160    
48     240    
-208   0      
0      112    
-16    16     
80     112    
0      -48    
-224   -64    
160    16     
-96    -16    
128    -16    
96     64     
-48    80     
32     16     
160    48     
-96    32     
32     80     
32     48     
-224   -16    
80     80     
272    112    
-416   -128   
112    -160   
96     64     
-16    144    
240    64     
-48    32     
64     0      
-16    96     
48     128    
-80    -96    
96     128    
0      80     
144    32     
-112   0      
160    48     
-48    64     
144    48     
0      0      
32     16     
-16    352    
304    128    
-272   -80    
224    112    
96     112    
-64    -48    
368    320    
208    208    
-400   96     
96     -16    
80     128    
-96    48     
-64    80     
96     80     
96     112    
-128   64     
160    128    
-16    16     
-80    80     
144    -16    
48     160    
64     32     
-16    64     
272    144    
-80    48     
80     80     
128    80     
192    400    
48     160    
-80    16     
96     128    
112    240    
-192   64     
-48    64     
64     64     
-96    -32    
48     112    
32     0      
128    160    
-96    32     
-112   -528   
224    16     
-80    -1328  
-176   128    
208    112    
-112   48     
144    192    
-48    128    
48     112    
160    96     
16     0      
96     0      
-80    64     
160    96     
-176   -160   
64     -160   
144    144    
-112   -176   
208    160    
0      0      
-160   192    
0      16     
-16    48     
80     48     
160    240    
-272   -128   
160    -16    
-96    -96    
32     48     
-16    160    
160    -80    
0      -32    
0      -256   
208    192    
0      -112   
-48    80     
96     208    
32     160    
-112   32     
64     112    
-80    -16    
128    192    
-208   16     
48     -112   
-192   -544   
256    0      
-128   16     
-144   -448   
-48    32     
-112   -528   
-32    -48    
112    32     
-32    80     
96     -96    
48     112    
80     80     
16     64     
48     96     
144    64     
-80    160    
64     96     
128    1008   
-176   528    
112    176    
16     -336   
128    208    
-176   -1344  
0      32     
64     288    
-80    656    
32     464    
80     224    
-96    432    
-48    304    
-32    304    
272    -96    
-48    176    
-64    -272   
-96    -448   
-48    -352   
240    -32    
-192   -672   
48     80     
80     16     
352    288    
-288   0      
240    16     
144    464    
80     -256   
-288   -112   
224    -592   
32     720    
112    -64    
-64    -256   
80     -160   
96     528    
-144   -384   
16     -672   
0      208    
352    304    
-304   -352   
400    96     
-96    128    
112    -96    
192    144    
16     -256   
112    240    
144    128    
-288   -416   
160    48     
224    240    
-48    -176   
32     224    
48     64     
-32    -1984  
-208   -192   
-1200  32     
0      16     
-96    -112   
192    64     
192    -192   
-48    16     
160    -256   
48     32     
-48    -96    
80     -160   
144    160    
160    -208   
96     80     
-208   -960   
32     -176   
96     176    
80     80     
160    256    
-32    -560   
64     96     
-48    -1776  
192    -656   
-48    -256   
-144   -192   
176    -400   
-96    64     
176    -416   
64     128    
16     384    
144    16     
-352   192    
112    208    
176    64     
-224   48     
-48    -256   
80     -192   
128    -32    
-208   -432   
272    -96    
-112   -256   
96     64     
32     -16    
-32    16     
64     -16    
32     -64    
-208   -32    
32     -16    
-368   -16    
0      16     
-48    48     
336    -80    
-96    -32    
16     -736   
-16    96     
256    736    
32     288    
80     -256   
-80    -48    
-128   -336   
48     -576   
256    96     
16     496    
48     96     
32     -288   
144    -160   
48     -336   
16     80     
32     -352   
112    176    
192    -160   
-208   256    
112    -128   
-32    288    
-48    -160   
384    32     
-528   368    
144    -672   
32     0      
-80    -128   
-96    0      
-80    208    
64     1216   
240    480    
-528   -736   
80     -2240  
80     528    
48     -288   
-48    -80    
144    112    
-64    -32    
0      160    
48     -16    
16     48     
-80    -448   
-256   416    
64     -48    
128    -16    
112    -128   
48     272    
224    -80    
-48    -144   
64     -128   
112    32     
48     240    
112    -368   
-496   -656   
208    -272   
-144   -64    
80     -16    
-256   336    
112    -160   
-16    0      
-96    -272   
-128   32     
80     -336   
0      80     
-320   96     
-16    -192   
64     -80    
160    0      
-144   -16    
48     16     
144    80     
-416   80     
-176   -256   
-32    -288   
176    80     
64     -64    
80     80     
-48    32     
80     96     
-176   64     
144    -272   
0      16     
48     304    
48     -80    
96     -80    
80     -160   
-32    -16    
-64    112    
48     -16    
112    16     
-304   48     
-160   -576   
-320   -368   
-976   128    
-48    64     
-544   16     
-16    32     
-160   -160   
224    -48    
64     112    
128    -16    
-208   -64    
48     32     
48     96     
80     144    
-80    -16    
-80    -80    
48     -320   
-192   -144   
-112   -256   
208    144    
-64    176    
-1072  0      
-224   -128   
-64    -192   
32     128    
-32    32     
-304   -256   
-64    -160   
-32    -208   
-16    -208   
160    624    
176    656    
-240   352    
-192   0      
16     -16    
-304   -128   
-64    16     
0      -128   
-176   -128   
-96    0      
192    112    
-96    48     
-336   -48    
320    80     
-144   0      
176    -96    
-208   -96    
144    -112   
-160   32     
48     -128   
128    64     
-96    128    
64     208    
-560   0      
16     -48    
-1408  -96    
-192   112    
32     32     
-80    16     
-128   -112   
96     0      
-112   48     
-160   -48    
-160   32     
208    96     
-240   112    
-128   112    
192    48     
-320   -128   
-16    -32    
-1248  -96    
160    48     
48     16     
32     -32    
-80    0      
-32    32     
48     96     
112    96     
-32    96     
224    320    
-240   80     
-48    -16    
80     96     
32     -16    
-80    48     
-128   -32    
112    128    
-192   64     
48     -16    
32     -32    
-16    320    
-112   144    
16     80     
16     0      
-80    -16    
32     80     
-240   -32    
64     128    
-160   -224   
-48    64     
-32    208    
16     112    
-608   -128   
-48    32     
64     -176   
-144   -16    
32     -48    
-112   64     
160    96     
-224   -112   
0      176    
64     112    
48     80     
-144   -80    
64     64     
-288   -192   
64     -16    
-144   -144   
-16    160    
16     224    
-160   144    
-80    32     
-16    48     
0      16     
-32    96     
0      48     
16     -48    
96     64     
-32    32     
48     112    
-112   48     
112    32     
80     96     
-32    0      
80     16     
-32    64     
-64    96     
64     80     
160    192    
-64    112    
-16    128    
-48    80     
96     64     
-64    16     
176    192    
-176   192    
224    368    
-320   64     
272    -32    
-16    64     
32     -16    
48     -16    
-96    -384   
-32    -320   
240    80     
-176   224    
224    288    
-176   320    
16     32     
-160   64     
0      -32    
-64    16     
112    -16    
48     64     
-80    336    
208    368    
-112   16     
272    320    
-80    576    
-224   -368   
224    16     
-112   256    
192    -64    
0      -32    
48     16     
64     -160   
128    64     
-16    96     
64     112    
96     96     
128    528    
32     48     
-96    -224   
48     144    
96     64     
-176   -96    
96     144    
-144   -48    
176    48     
48     304    
80     -128   
176    112    
32     96     
112    112    
-32    0      
32     -112   
96     320    
16     -64    
112    -80    
-112   -96    
-16    64     
-224   -48    
0      160    
-64    16     
16     464    
208    -288   
-192   16     
288    320    
-48    368    
32     208    
-128   -320   
64     64     
80     64     
176    -32    
64     144    
-224   96     
-96    -32    
160    160    
-144   80     
80     208    
16     48     
64     128    
16     560    
-80    -160   
-48    -176   
-512   -688   
48     -272   
-128   -240   
304    176    
-144   352    
256    -576   
272    576    
-208   192    
128    -400   
256    -160   
-48    -16    
288    -2096  
752    672    
-640   0      
48     -672   
240    384    
160    256    
16     -16    
208    48     
-64    32     
-144   496    
160    -704   
96     80     
272    624    
-48    -608   
16     -32    
160    -528   
80     496    
144    112    
0      0      
160    192    
64     16     
-64    32     
48     112    
464    80     
-192   48     
96     48     
-16    -16    
32     48     
-96    -320   
208    48     
-16    -80    
368    640    
-304   32     
-32    -656   
224    336    
32     352    
-64    -160   
240    208    
-32    256    
32     400    
80     -592   
-64    32     
640    912    
-496   -32    
144    -256   
-48    -320   
0      224    
96     -864   
-112   576    
-112   -304   
96     -576   
-144   -16    
640    800    
-64    944    
-352   -624   
256    -512   
-208   32     
32     112    
96     -224   
144    192    
16     -160   
-16    80     
144    -208   
32     96     
144    32     
0      144    
32     -16    
32     64     
-208   -288   
256    -80    
48     -64    
112    160    
192    304    
-80    -240   
0      64     
128    -160   
96     192    
-16    -32    
288    384    
-320   32     
96     -80    
16     16     
-80    -96    
192    464    
-64    96     
0      48     
-16    -320   
-80    32     
-48    64     
-32    -304   
144    -208   
-80    -128   
16     -336   
96     -144   
176    -896   
32     256    
176    192    
0      240    
0      32     
-112   -416   
0      -384   
240    -432   
-32    -96    
128    -176   
-96    144    
288    -112   
-96    32     
96     -352   
-80    -96    
112    -64    
48     -496   
-272   -192   
480    -768   
-208   32     
0      -112   
16     -752   
16     112    
112    -208   
-48    0      
96     240    
-112   48     
96     112    
0      32     
-128   32     
64     -16    
-128   -144   
48     -144   
128    -320   
32     -384   
-448   -32    
-32    -160   
288    48     
160    -288   
-144   -256   
160    -1296  
16     80     
192    96     
-80    -32    
48     -320   
16     -80    
-16    -128   
-80    80     
-224   -352   
0      112    
-336   -16    
-32    -224   
176    -160   
48     -160   
32     0      
240    128    
-48    96     
224    -208   
-176   32     
128    -256   
-48    0      
176    -48    
0      64     
-16    96     
64     48     
-304   -48    
144    -112   
-944   -112   
400    112    
-128   288    
-208   208    
304    160    
-144   -1104  
-208   -96    
-48    -208   
80     -160   
80     224    
48     64     
-80    -112   
-96    -160   
-560   -32    
112    112    
-416   -160   
208    -96    
80     -80    
320    -64    
256    -336   
160    -304   
224    16     
64     96     
-192   -96    
160    -128   
96     -48    
-144   -48    
-32    -48    
144    160    
272    128    
-432   -368   
80     -336   
-640   32     
16     32     
16     128    
32     64     
96     -128   
96     -480   
160    48     
-48    16     
-48    -144   
-32    -16    
48     -256   
128    64     
112    -16    
-32    80     
-176   -256   
128    128    
192    96     
-480   80     
0      -240   
480    48     
-64    -368   
96     32     
-64    16     
144    96     
-16    128    
-112   -16    
-384   -48    
160    -48    
160    160    
32     -128   
0      48     
16     -48    
16     0      
96     -240   
-192   112    
128    -608   
224    -80    
-144   -64    
32     -80    
-80    -16    
208    0      
-272   0      
32     32     
-96    0      
16     96     
-1296  128    
112    -16    
-160   48     
32     -448   
-64    32     
256    112    
-192   48     
16     -16    
-96    -80    
16     -80    
-32    -144   
0      32     
112    32     
-64    16     
208    -48    
-176   48     
-112   -208   
16     64     
-160   -112   
-64    -32    
-112   -128   
-288   -64    
-256   -160   
-112   -112   
-176   0      
-32    64     
-144   64     
32     -64    
64     0      
-640   -48    
32     -48    
-272   -64    
160    176    
-320   -224   
0      -48    
-32    -32    
128    32     
32     176    
-128   192    
96     304    
-208   176    
-80    272    
64     96     
-96    0      
-224   -64    
176    -112   
144    32     
-96    96     
-224   -176   
-288   0      
-32    -64    
80     -16    
-112   -288   
-32    -304   
112    0      
-128   -96    
-48    -48    
-48    -96    
80     208    
80     80     
80     128    
160    208    
-160   432    
112    176    
-16    48     
192    -368   
-128   -144   
0      112    
0      0      
-160   32     
-80    -288   
-32    -96    
-176   128    
-64    192    
-544   -64    
-176   -448   
64     208    
-112   128    
144    368    
144    64     
-80    -32    
0      -48    
-368   336    
176    -144   
-160   368    
-16    -16    
32     48     
-128   -80    
16     64     
-288   48     
-32    -144   
32     -112   
240    560    
-128   -320   
-16    -112   
-16    0      
32     48     
16     336    
-80    160    
128    272    
64     384    
80     192    
-544   -64    
-208   -400   
-64    -464   
224    336    
32     160    
-160   144    
-128   -160   
-64    -368   
176    -112   
144    272    
80     528    
-80    -48    
-272   -288   
-80    -112   
-320   -160   
-160   -128   
-160   -176   
-576   -128   
80     272    
-320   -96    
-144   -336   
80     0      
-144   576    
-32    -32    
-144   80     
112    192    
-32    -16    
-80    192    
208    144    
96     416    
96     64     
-48    96     
-304   -128   
144    -32    
32     -176   
128    32     
-32    224    
128    144    
16     80     
32     32     
-512   -304   
480    -656   
144    688    
-32    352    
-112   -304   
-144   0      
-112   0      
-336   -32    
0      -128   
480    512    
-464   112    
-112   -224   
320    176    
-208   16     
-176   112    
144    464    
-336   -208   
-224   448    
48     32     
96     480    
-480   -512   
96     -352   
64     400    
32     32     
-208   -48    
144    -112   
64     144    
-256   -320   
-80    -32    
-16    -64    
208    0      
-368   -1008  
320    960    
-240   64     
0      -144   
160    336    
144    800    
-144   -16    
96     -224   
192    0      
-256   -320   
64     256    
176    16     
-144   64     
112    0      
80     16     
-208   80     
96     -272   
0      336    
-128   -352   
-144   288    
240    144    
-288   400    
240    -64    
80     224    
-288   160    
-16    -320   
48     -32    
80     -144   
-224   64     
224    272    
-224   -240   
64     96     
-80    -16    
112    112    
-208   96     
128    176    
-32    656    
-128   -64    
-64    -336   
176    448    
-16    64     
96     -32    
16     208    
-80    96     
128    256    
-48    -64    
112    96     
-288   96     
112    144    
-32    48     
80     -896   
32     224    
176    128    
-32    64     
112    272    
240    80     
-144   -144   
288    -16    
-112   -128   
208    -64    
-224   -224   
160    -48    
-96    -176   
240    208    
-96    112    
-16    -464   
288    96     
-96    -48    
224    352    
-384   -160   
-16    160    
96     32     
48     112    
48     128    
-48    112    
-128   16     
48     64     
-32    -48    
256    288    
-144   96     
-16    -32    
144    32     
64     48     
112    -144   
-16    -16    
240    208    
-48    0      
-16    64     
32     32     
192    192    
-288   48     
192    80     
-96    32     
160    16     
-96    64     
112    -48    
-112   -16    
-32    128    
48     16     
-16    176    
128    208    
-96    192    
48     192    
96     -96    
80     144    
0      80     
32     -160   
240    -208   
64     -144   
208    80     
16     -240   
112    80     
80     -48    
80     32     
112    48     
-32    48     
-16    0      
144    0      
-144   -160   
-64    -16    
128    -16    
208    272    
-192   80     
64     -32    
96     64     
128    -128   
-32    32     
160    -320   
-48    64     
32     -1296  
48     112    
-128   -176   
96     16     
48     48     
144    80     
-416   -240   
160    -352   
-64    272    
64     32     
128    0      
208    176    
160    288    
-320   -384   
80     -32    
112    -144   
144    176    
-32    192    
-16    96     
32     0      
-48    16     
144    -128   
80     -256   
96     80     
240    -80    
64     144    
272    -400   
64     160    
-48    -416   
128    -160   
448    112    
0      352    
352    224    
-32    80     
-32    -192   
-176   -192   
64     224    
112    528    
-320   -64    
288    96     
-416   384    
-368   96     
16     160    
-304   -192   
64     128    
96     -1024  
144    176    
-352   -32    
208    80     
32     176    
224    -416   
112    -1648  
-32    -192   
16     -1344  
0      -112   
352    432    
-256   368    
-32    288    
-32    -176   
16     32     
336    -128   
-32    -352   
32     64     
80     16     
176    0      
-704   -32    
-208   -656   
48     -112   
-80    -160   
16     -256   
192    -128   
0      -96    
-80    16     
-64    -160   
96     48     
64     -32    
32     -96    
-80    96     
240    64     
-64    176    
-288   16     
32     -64    
64     48     
96     144    
176    0      
-112   -432   
48     -160   
32     -752   
96     -128   
-32    -64    
128    96     
32     -176   
-64    80     
48     -64    
32     32     
96     160    
-272   -80    
-432   -48    
160    96     
112    96     
0      -32    
0      -16    
256    -32    
128    48     
-32    112    
-128   -80    
-16    -160   
48     48     
224    96     
-32    -16    
96     208    
-144   176    
-80    400    
-512   80     
112    48     
-160   -80    
-64    -176   
144    -208   
-176   -96    
-96    -1168  
112    80     
16     0      
48     96     
0      48     
160    -240   
-496   -304   
80     -192   
-400   96     
240    512    
-1472  304    
160    -112   
80     128    
96     -160   
48     192    
160    -560   
-16    64     
240    448    
-16    -192   
128    240    
-80    -96    
64     80     
-48    -384   
96     192    
-80    16     
16     176    
32     -80    
-320   -112   
48     -544   
288    496    
-80    -464   
96     160    
128    -2080  
64     64     
-32    -208   
64     -224   
64     128    
16     160    
-320   -448   
-16    -928   
80     400    
256    912    
-16    128    
16     -496   
16     -112   
144    0      
32     80     
112    -2144  
16     112    
256    336    
-32    288    
-176   -64    
0      -64    
-128   -48    
-16    32     
96     64     
16     -16    
-192   -160   
80     -512   
192    80     
160    -80    
-48    -32    
-112   16     
176    -64    
128    -16    
-240   -256   
-192   -400   
16     -64    
-608   -400   
752    -480   
0      384    
656    768    
-768   240    
160    -128   
160    224    
432    64     
-144   112    
-176   -96    
-944   -144   
-528   -432   
176    -272   
-480   -336   
304    -256   
16     96     
144    48     
-256   -240   
-848   -352   
32     -256   
-112   -96    
608    672    
-80    352    
-240   144    
-128   -288   
-464   -304   
0      -384   
-1072  -240   
176    -208   
80     -144   
256    240    
-16    304    
-144   64     
-320   -176   
256    160    
-512   -128   
368    -32    
-416   -336   
-32    -432   
-32    96     
-400   176    
304    240    
-48    400    
240    528    
-480   -144   
16     -80    
-64    -192   
144    -144   
-112   480    
-80    128    
-48    0      
-256   -32    
352    -656   
-272   432    
272    -256   
-128   288    
-80    -144   
-16    304    
-256   -160   
-464   -528   
-368   160    
-144   -416   
208    640    
-112   -112   
-16    -16    
-80    -288   
112    112    
112    -32    
160    272    
-64    80     
32     -432   
320    528    
-144   64     
-48    240    
64     -160   
96     192    
-288   128    
16     -16    
64     32     
192    400    
-64    -80    
-128   -128   
208    208    
-80    112    
208    160    
-144   128    
32     -80    
64     -96    
-240   384    
128    224    
-208   48     
0      192    
32     288    
-432   176    
-112   208    
144    64     
384    320    
-368   -16    
-16    -32    
-16    -208   
-48    32     
-112   112    
-64    144    
-80    160    
-272   288    
-128   -16    
-176   -144   
144    144    
-448   -368   
0      112    
224    288    
-48    112    
-32    160    
176    160    
-176   -32    
-16    128    
-48    -32    
48     48     
-32    192    
-240   -288   
32     0      
-128   224    
240    128    
-240   -32    
144    -32    
-96    -112   
0      -240   
-64    32     
-48    0      
0      -96    
64     -128   
32     144    
48     64     
-192   96     
-80    0      
-48    -48    
96     96     
-32    160    
-512   -96    
-96    -16    
96     -128   
-112   96     
176    288    
-80    -16    
0      48     
64     160    
-192   -112   
-112   96     
320    432    
-288   128    
48     96     
16     208    
-96    -80    
-304   -64    
160    32     
-80    -32    
32     16     
48     64     
144    96     
-32    32     
-16    -80    
64     112    
64     48     
-80    64     
-48    16     
0      96     
-192   0      
112    112    
-16    64     
64     272    
-80    80     
-80    0      
224    32     
-96    -16    
64     80     
-80    64     
144    112    
-144   0      
80     112    
-96    -96    
32     48     
176    64     
32     160    
-48    80     
-48    96     
0      0      
80     160    
-16    320    
0      496    
96     -16    
-128   -480   
-112   -144   
-48    256    
32     336    
-128   208    
144    112    
-32    96     
16     32     
-64    -80    
-16    80     
64     80     
64     32     
-80    80     
208    80     
-48    16     
64     32     
-16    64     
80     80     
48     96     
32     112    
272    272    
-352   -48    
128    176    
80     16     
64     64     
128    112    
80     144    
128    160    
-176   112    
48     32     
-160   0      
-272   -240   
480    128    
-112   128    
-16    -160   
64     96     
144    144    
112    368    
-112   80     
176    224    
-208   0      
-64    -224   
32     -368   
32     160    
208    176    
-160   -80    
128    -16    
48     -16    
32     16     
-80    32     
0      -64    
16     80     
-112   -832   
224    64     
16     128    
48     32     
-16    64     
-144   -80    
96     -160   
240    160    
-352   -304   
544    -96    
-176   176    
384    0      
-64    128    
208    -48    
-128   -32    
224    -112   
-80    48     
272    -32    
-192   0      
96     -48    
48     128    
-80    64     
208    224    
-304   -96    
80     32     
-48    -16    
176    96     
-128   48     
96     -48    
16     176    
48     -544   
48     80     
-32    -192   
0      96     
0      64     
144    272    
32     -16    
-80    16     
-48    -144   
192    48     
-96    16     
272    176    
-176   80     
96     -128   
32     80     
-16    -144   
128    16     
224    -560   
32     48     
64     144    
112    64     
-192   80     
-112   -144   
-16    48     
32     48     
32     -112   
-80    -96    
0      0      
-48    -176   
32     128    
96     -48    
-32    16     
-32    -192   
160    96     
-64    -1280  
128    32     
-96    64     
256    608    
48     432    
192    544    
-64    512    
-32    -16    
-48    -288   
-48    -64    
64     32     
176    -176   
80     560    
-304   -1040  
96     -16    
64     -128   
224    608    
0      64     
-80    -48    
32     240    
224    96     
0      16     
-64    -32    
80     80     
304    32     
-144   32     
208    -176   
-16    64     
64     -112   
0      64     
256    80     
-256   -560   
144    416    
128    32     
-64    -752   
128    560    
64     -128   
16     224    
16     160    
0      -160   
32     320    
96     -368   
-80    80     
48     32     
16     -48    
-160   -592   
96     -272   
-112   48     
112    -896   
0      -80    
-80    -16    
128    -432   
16     -304   
80     -2512  
-96    -80    
224    112    
-112   160    
80     160    
-32    0      
-160   0      
144    -400   
-16    -560   
48     -16    
-112   -176   
-192   -768   
-672   -912   
80     -224   
-208   -512   
-32    -656   
128    -48    
-16    -16    
160    64     
-48    96     
0      -384   
16     -752   
176    160    
-16    -336   
-16    48     
96     -240   
-64    -224   
-208   -16    
304    -64    
-160   -176   
32     -480   
80     -32    
240    -192   
-64    240    
176    -2464  
-48    240    
112    16     
16     32     
256    192    
-128   144    
-304   -896   
96     -144   
-256   304    
-224   -160   
240    112    
0      -208   
64     64     
16     176    
208    240    
80     -864   
-256   -304   
64     -688   
-128   -96    
416    144    
-176   288    
-192   -64    
80     -112   
-144   -256   
-208   -784   
-960   -112   
-240   592    
288    1088   
112    96     
-64    -912   
48     -464   
48     -96    
208    -272   
192    192    
112    32     
-224   208    
64     752    
-48    224    
-432   -816   
48     -80    
-176   16     
-160   -192   
-400   -336   
720    992    
-608   -416   
112    -448   
16     -576   
352    -256   
384    784    
-80    464    
80     -176   
-96    -160   
224    272    
160    208    
-240   -96    
-64    288    
160    80     
-720   -624   
-16    -416   
-1088  -80    
128    -256   
32     368    
-64    -208   
-240   96     
288    -224   
-96    -16    
144    32     
-128   -48    
-192   64     
0      16     
16     48     
176    -16    
-464   80     
176    -208   
48     -144   
80     -128   
-112   -32    
80     -32    
-80    -352   
-224   -384   
272    -112   
-368   112    
-96    -64    
-32    160    
176    32     
-144   -48    
32     -176   
-80    -192   
48     -208   
64     64     
80     -32    
-16    112    
64     -336   
176    192    
-272   -128   
208    -64    
-48    -368   
-16    -32    
-128   0      
-208   -48    
-128   -64    
128    -48    
-160   -128   
112    -32    
208    176    
-208   -304   
112    128    
-224   -240   
-16    80     
-16    48     
-112   112    
-144   64     
-928   32     
64     -32    
80     32     
-32    32     
16     96     
-80    -160   
-416   -128   
64     96     
-80    -80    
32     96     
-432   -48    
112    64     
-96    -16    
96     16     
-32    -48    
-224   144    
16     160    
-720   48     
64     112    
16     96     
48     64     
-304   -64    
240    0      
-224   -64    
208    96     
-80    -32    
64     48     
-80    32     
-144   -96    
64     80     
-160   144    
-80    64     
-160   48     
-48    -112   
-832   -240   
16     192    
48     -80    
-16    112    
80     48     
-224   80     
-80    -32    
112    -144   
-80    16     
-48    -16    
-64    48     
48     16     
-160   48     
-192   64     
-112   16     
-448   -16    
192    288    
-256   176    
-16    80     
-32    -192   
-48    -80    
-80    32     
48     80     
112    48     
-272   32     
0      80     
-64    -32    
-112   0      
-384   -32    
128    128    
-640   -416   
112    224    
-128   -80    
-208   48     
32     -176   
96     80     
-96    80     
-128   0      
64     32     
64     32     
16     0      
-320   -32    
240    112    
-144   48     
-80    48     
-208   -64    
32     224    
-272   -48    
176    32     
32     -32    
112    96     
-16    112    
16     64     
32     112    
32     112    
-48    96     
-96    32     
-48    -16    
112    16     
-176   -208   
-128   -144   
128    176    
-464   -80    
144    64     
-176   80     
-112   96     
-64    48     
-48    -48    
32     64     
96     128    
-192   32     
144    128    
-48    -32    
64     32     
32     112    
-96    -48    
-48    -176   
-336   -80    
48     144    
-288   -160   
256    96     
-160   96     
96     -80    
0      128    
144    160    
-96    -32    
-80    0      
-48    32     
-80    32     
80     32     
352    544    
-80    688    
-208   176    
80     -160   
192    -32    
48     160    
-16    176    
32     80     
-16    80     
-80    0      
-48    -32    
16     48     
0      96     
-48    -16    
128    80     
-80    16     
-96    -96    
176    160    
-160   -16    
-96    -208   
320    224    
-176   112    
-128   0      
176    144    
-32    0      
-256   -96    
192    0      
-80    -16    
240    32     
-160   -48    
-144   -272   
64     -64    
64     96     
-176   -512   
-96    -256   
352    144    
-48    128    
96     352    
-288   208    
-48    80     
112    128    
-16    80     
144    128    
-160   32     
-128   48     
-80    -32    
-32    176    
176    48     
-144   64     
224    64     
-80    -16    
-80    -128   
160    96     
96     112    
112    32     
-112   -64    
48     -176   
224    240    
0      -80    
48     224    
-16    368    
288    432    
-144   368    
112    272    
-224   -304   
112    -352   
272    272    
112    320    
112    224    
112    -48    
96     176    
-16    256    
-80    -144   
32     96     
144    -32    
0      128    
192    96     
-176   176    
288    144    
-240   -112   
272    160    
-16    96     
48     -16    
96     128    
-32    -16    
-48    -224   
-48    480    
144    96     
-240   -352   
144    -832   
-96    144    
80     -256   
0      -48    
224    -96    
48     192    
32     80     
64     64     
48     64     
16     32     
80     64     
48     80     
64     48     
32     64     
16     -16    
0      -16    
-80    -48    
160    -304   
64     160    
-64    16     
256    16     
-144   128    
32     80     
16     16     
96     96     
32     -48    
0      176    
-64    -64    
144    -16    
160    80     
48     -112   
176    144    
304    64     
-192   256    
192    64     
-96    160    
144    64     
96     320    
-16    16     
-32    -48    
-144   112    
-112   -192   
-16    -16    
32     0      
192    16     
-32    32     
160    96     
208    0      
16     272    
96     -544   
-208   336    
416    672    
-176   240    
208    176    
-96    176    
48     0      
-32    112    
48     112    
96     -80    
-80    80     
112    -112   
80     112    
64     -32    
-16    80     
160    16     
-112   64     
80     -32    
16     64     
-16    -48    
192    240    
128    304    
208    576    
128    448    
16     -112   
128    192    
-192   -256   
16     176    
-16    -128   
176    256    
768    400    
-912   -16    
-192   -1936  
448    -416   
176    832    
96     304    
0      -112   
160    144    
-144   112    
48     -64    
64     -336   
-256   -544   
336    192    
-160   80     
320    128    
-112   -768   
384    336    
-112   256    
48     -64    
208    48     
48     160    
128    64     
48     464    
-32    16     
32     -272   
-32    208    
0      -144   
48     112    
128    0      
-112   64     
-16    -176   
176    -160   
32     -304   
176    336    
112    192    
64     112    
352    448    
-96    80     
112    128    
-80    -112   
288    176    
-240   -304   
128    112    
-192   144    
256    96     
-64    -128   
272    176    
-48    144    
128    -256   
-416   -96    
528    -704   
-336   -96    
96     320    
-32    -16    
16     -112   
144    -448   
480    368    
-544   208    
176    -64    
-192   192    
288    -80    
-320   -1424  
240    144    
-48    -288   
-32    80     
-144   -208   
160    32     
-1104  -80    
176    -112   
0      64     
-48    -112   
128    112    
48     0      
-224   -64    
80     160    
176    -64    
48     -80    
-160   -96    
112    -64    
112    80     
-160   -64    
80     -320   
-16    -32    
144    -192   
32     0      
32     -144   
112    -64    
-80    -640   
304    -192   
-32    -2960  
144    32     
208    -96    
-192   64     
192    -48    
-240   32     
-32    0      
-16    0      
-192   -144   
224    16     
208    224    
-96    16     
0      -176   
160    -160   
16     -64    
-64    -288   
-48    32     
32     0      
-16    128    
-64    -160   
224    192    
-240   -64    
144    -48    
64     32     
48     -112   
-528   -64    
-80    -64    
112    -32    
-96    -256   
-80    0      
0      -496   
96     96     
208    -2400  
-176   32     
176    -16    
0      16     
-112   -32    
-16    -96    
-128   -80    
80     32     
-416   32     
-48    -64    
-704   16     
-96    96     
160    -80    
112    -192   
96     32     
-240   -1376  
368    -32    
-96    -16    
256    128    
-304   -112   
272    -208   
-160   80     
144    48     
-32    0      
0      -16    
-112   64     
-176   -48    
224    -80    
48     -208   
176    48     
-224   -272   
192    160    
-32    80     
48     -80    
32     -112   
80     -48    
192    144    
-128   144    
-112   64     
176    -48    
-32    -32    
160    -96    
48     32     
32     -144   
208    112    
-32    -16    
-32    -192   
128    -80    
32     -144   
160    288    
-256   80     
-32    -128   
32     -48    
0      0      
-16    -32    
32     64     
80     -96    
32     64     
112    -144   
48     64     
208    -560   
-464   -48    
-176   16     
64     48     
32     64     
256    48     
-240   64     
32     96     
-256   96     
128    -96    
16     0      
-16    -32    
-32    80     
-896   -176   
0      0      
160    32     
-512   48     
32     16     
-32    144    
-288   144    
-1568  32     
16     32     
48     -112   
128    128    
48     0      
64     144    
-160   -176   
32     96     
112    -208   
64     112    
96     0      
32     80     
64     32     
-272   32     
-32    -48    
-528   -192   
-16    -288   
128    -48    
32     0      
-224   -112   
-96    32     
48     -224   
32     112    
-32    -16    
-96    0      
112    96     
-80    16     
64     16     
32     64     
112    0      
0      624    
352    624    
-160   -16    
-80    -32    
-240   -64    
272    -336   
-128   -496   
336    320    
-112   96     
64     240    
-64    96     
-112   -128   
160    0      
-80    32     
112    96     
-176   160    
16     96     
48     -80    
80     -48    
160    -16    
-320   -32    
128    -128   
-64    -48    
80     -32    
-32    -96    
-176   32     
-16    48     
-64    352    
112    224    
16     80     
96     240    
-272   336    
-400   0      
144    -80    
-544   -224   
160    -64    
144    -272   
32     224    
240    464    
-32    640    
-96    16     
-112   -96    
-16    -96    
-96    32     
-96    64     
-144   -96    
-48    352    
144    32     
-160   112    
-480   64     
-80    -16    
48     -64    
-64    48     
48     -48    
368    368    
-224   448    
-112   -192   
48     -16    
64     48     
-64    48     
32     48     
64     96     
-192   -32    
48     80     
0      256    
192    80     
-64    336    
32     640    
16     -96    
-272   -1008  
112    -48    
96     640    
-64    304    
-48    32     
-48    -160   
32     192    
-112   -128   
-112   -240   
-112   -224   
-32    64     
112    640    
-16    96     
32     0      
0      64     
64     64     
16     112    
112    432    
-144   112    
-112   -416   
-48    -288   
160    -32    
-144   480    
128    -64    
-16    80     
-80    96     
-32    16     
32     48     
-96    0      
80     96     
16     64     
-32    80     
32     48     
64     64     
-32    48     
-48    -16    
192    256    
32     592    
-16    128    
-80    208    
-64    -112   
-112   -192   
-16    64     
64     48     
-64    160    
16     112    
96     160    
32     -64    
-16    0      
0      16     
-16    144    
32     160    
0      64     
-176   -48    
144    0      
16     16     
32     80     
-16    48     
48     80     
-32    -96    
208    112    
128    656    
48     288    
0      16     
64     -32    
-48    -32    
-80    -240   
-80    -304   
96     -128   
-576   -368   
544    320    
-160   512    
432    848    
-144   400    
0      -240   
80     -48    
-16    96     
96     128    
-48    112    
112    48     
112    224    
-96    48     
-16    656    
-48    -272   
-96    -48    
64     192    
96     -16    
32     176    
400    1168   
-496   -480   
416    -112   
128    448    
48     32     
-112   -16    
32     -368   
-32    -16    
48     64     
-64    -64    
32     -560   
272    -960   
-16    592    
80     -32    
48     -272   
16     192    
128    192    
-80    224    
-16    368    
16     -80    
-48    -16    
-176   -144   
0      96     
64     -480   
144    -128   
16     -32    
176    -272   
-112   -48    
-48    -96    
16     -48    
64     -96    
-16    64     
240    192    
-48    208    
0      32     
48     64     
224    -32    
-144   32     
16     16     
0      0      
-80    -80    
368    288    
-112   592    
-176   352    
-32    32     
48     16     
208    272    
-368   0      
144    128    
-80    96     
64     160    
-80    -192   
80     112    
32     0      
-48    -208   
32     96     
144    -224   
128    224    
-112   -1744  
0      48     
16     32     
32     -176   
384    64     
176    192    
-48    64     
-48    48     
-32    -128   
176    48     
-272   -80    
576    -304   
-400   304    
576    -160   
-288   144    
400    -992   
-16    64     
96     128    
-32    16     
-32    -32    
-48    48     
176    288    
-32    96     
144    112    
64     -16    
336    176    
-192   0      
-32    128    
-16    -176   
-96    144    
-16    -208   
-16    112    
-48    -608   
-16    -48    
32     -80    
32     112    
0      -16    
192    160    
-16    32     
208    160    
-64    224    
-112   -96    
16     144    
160    -160   
-128   -16    
128    -176   
16     96     
96     0      
80     80     
-16    48     
176    80     
-16    -160   
48     -112   
144    -160   
64     96     
144    96     
240    -768   
64     128    
112    -96    
96     80     
-176   -112   
128    208    
-160   0      
160    352    
112    -48    
-128   64     
208    48     
32     64     
112    64     
112    -224   
-96    48     
176    -16    
-112   -176   
192    -48    
112    288    
96     -128   
-128   16     
144    -288   
80     0      
128    80     
0      464    
48     96     
96     -2320  
0      -288   
352    -144   
-48    64     
208    32     
128    144    
-128   -144   
224    144    
-96    -128   
96     128    
16     192    
96     -608   
-208   -240   
320    -560   
-32    0      
-912   -176   
96     -224   
208    80     
112    -128   
0      -48    
112    -1312  
-96    -112   
80     48     
80     64     
96     -96    
0      32     
64     112    
-64    -224   
80     -224   
176    64     
-16    128    
-80    16     
112    -96    
16     -16    
48     -224   
16     -192   
112    -112   
80     -416   
128    -16    
48     0      
64     -48    
-80    -48    
240    64     
-48    -32    
224    160    
-288   -16    
224    -16    
-1536  48     
208    48     
-32    -144   
128    -112   
176    -32    
160    -448   
16     -96    
96     -352   
-176   48     
-192   -144   
256    -64    
112    -112   
144    -64    
-384   -112   
176    -224   
64     32     
0      32     
-64    0      
208    -32    
-48    64     
288    -336   
-416   432    
-192   -480   
208    -32    
96     64     
112    384    
-208   128    
208    0      
32     -32    
32     16     
-112   128    
-48    -48    
160    -208   
128    80     
112    -288   
0      -256   
160    32     
160    -1216  
-16    64     
-128   -192   
80     304    
-80    -16    
-112   -48    
-176   32     
80     -192   
-592   -560   
64     -336   
-1568  -192   
96     0      
-32    96     
64     -80    
0      -16    
-96    -528   
48     -256   
96     -176   
-208   -352   
96     80     
-80    112    
-64    0      
144    288    
-96    304    
208    16     
-592   -320   
-16    -160   
96     320    
-64    -240   
32     0      
-32    -400   
64     16     
96     -1568  
-64    -112   
-288   -336   
96     48     
-224   -160   
16     144    
64     128    
32     -160   
-64    64     
160    96     
-128   48     
32     -320   
112    48     
-64    0      
144    -208   
-144   240    
304    160    
-368   -96    
176    -160   
48     48     
416    352    
-192   96     
-96    80     
-96    -512   
320    80     
-224   -80    
-32    208    
-16    80     
0      -448   
-16    144    
-128   816    
-1168  -240   
-240   -496   
96     -32    
-128   496    
608    320    
-432   0      
160    48     
-192   -336   
160    0      
-144   80     
96     -112   
0      144    
-288   -224   
-64    -16    
0      16     
-496   -16    
16     64     
-48    128    
-272   -16    
400    240    
-416   432    
432    -80    
-48    320    
-416   -64    
80     -416   
-352   -32    
432    -96    
-144   448    
-80    176    
160    304    
-160   368    
-96    -432   
240    96     
-384   160    
-864   -144   
48     112    
-112   80     
128    144    
-128   0      
16     -96    
-256   -384   
272    112    
16     416    
-208   -240   
112    -112   
-192   112    
-32    0      
-480   -160   
112    -160   
-96    144    
-176   48     
-912   0      
48     64     
-48    -112   
48     96     
-16    -112   
0      80     
0      48     
-48    32     
-240   -352   
64     -320   
-48    384    
48     160    
-368   -976   
-48    -160   
32     464    
-512   -240   
-64    48     
144    16     
-64    80     
-80    -304   
64     -16    
-128   64     
176    128    
-272   -464   
416    64     
-144   656    
64     -336   
48     -224   
-48    544    
-64    -96    
-320   48     
176    304    
-16    -32    
16     176    
0      48     
-144   -80    
-80    -112   
-32    -496   
160    128    
-48    -736   
144    336    
-112   320    
-112   -16    
-80    -352   
-96    -64    
-112   176    
-64    -80    
-448   144    
192    16     
144    288    
-272   64     
-80    -128   
64     -64    
432    816    
-288   320    
-32    -48    
-48    -416   
-80    -192   
-96    80     
80     304    
-80    -432   
-128   -224   
-80    -352   
80     -224   
-112   -32    
192    112    
-16    64     
128    48     
48     48     
-16    16     
64     64     
128    0      
-96    -48    
16     0      
-64    240    
-80    128    
32     256    
-96    176    
-128   16     
0      -64    
16     -32    
128    64     
-400   0      
128    0      
-176   0      
48     160    
-32    96     
-32    176    
-80    416    
48     384    
-256   -80    
208    80     
-128   96     
176    -160   
-208   80     
192    16     
-144   16     
64     96     
16     0      
32     208    
-16    -64    
-176   144    
16     -240   
0      -432   
96     320    
144    48     
-176   240    
320    80     
-32    -128   
208    -160   
-32    128    
32     -96    
16     48     
16     96     
32     128    
-80    304    
-160   160    
144    112    
-96    -112   
64     -16    
-336   0      
112    48     
-48    -64    
-96    48     
96     -16    
0      32     
320    32     
-48    -64    
272    128    
-32    128    
-80    272    
0      128    
-64    240    
-32    240    
-144   32     
-112   0      
-192   -16    
16     64     
-80    -240   
-48    -160   
32     32     
-144   208    
-32    160    
-80    -80    
-224   -64    
48     32     
64     -96    
48     48     
-160   -224   
-80    -96    
224    -208   
32     -80    
32     448    
-48    80     
-320   32     
-48    80     
-32    32     
-64    64     
-80    64     
16     64     
80     96     
-176   -48    
-80    64     
-64    64     
96     96     
32     96     
64     96     
-16    -80    
128    144    
-80    160    
16     224    
32     64     
-16    96     
192    112    
-192   -64    
80     80     
32     16     
-32    96     
32     -16    
-96    -144   
128    112    
176    -2160  
-224   64     
176    96     
-80    64     
112    64     
80     0      
32     80     
-16    -128   
-112   16     
128    128    
-16    80     
128    112    
-96    144    
192    -48    
-48    64     
160    -192   
0      80     
80     176    
192    192    
-112   48     
-32    -176   
-16    -272   
32     160    
144    144    
-48    32     
0      -64    
208    288    
192    240    
-128   -64    
96     32     
48     -144   
-128   -128   
256    -848   
-32    32     
16     96     
80     208    
32     -288   
144    128    
192    -48    
0      112    
-80    48     
240    208    
-48    32     
64     -48    
144    144    
16     -64    
-48    96     
96     -992   
0      128    
32     336    
-96    16     
-128   -128   
208    80     
80     32     
-112   80     
-192   -112   
160    -224   
160    144    
96     -16    
0      128    
32     -288   
0      96     
272    -560   
-176   192    
-144   112    
208    416    
-32    416    
0      240    
-144   32     
272    80     
0      -176   
-32    -144   
80     -96    
16     -144   
-16    16     
112    144    
64     -144   
-32    -240   
96     -32    
16     128    
176    80     
-304   -416   
288    192    
-32    480    
48     112    
176    -32    
-16    -592   
96     48     
-80    -384   
400    560    
-192   -336   
-48    -80    
64     544    
48     -432   
0      160    
-112   144    
80     416    
16     -112   
176    -96    
144    320    
-176   144    
-128   -592   
32     48     
48     128    
96     160    
-64    -128   
176    192    
32     48     
-16    -32    
64     -208   
336    528    
0      48     
-16    -1024  
16     -16    
-320   -176   
0      -1376  
208    48     
0      -144   
96     144    
-176   -16    
0      -368   
48     0      
16     -128   
160    48     
-32    -16    
272    -288   
224    336    
-96    -160   
16     112    
-464   -224   
80     -1136  
176    -32    
96     48     
-48    80     
32     -752   
160    -240   
-208   -112   
-32    144    
48     272    
64     208    
80     -256   
336    1280   
-80    512    
-160   -560   
-48    -544   
-240   192    
160    -32    
160    -160   
-16    144    
240    -400   
-400   -560   
368    -16    
192    240    
0      -304   
-112   -80    
-96    -80    
96     128    
-224   224    
272    -512   
208    352    
272    -336   
32     192    
0      -192   
144    -624   
240    672    
256    288    
-32    -80    
112    288    
176    -272   
544    448    
-320   448    
-128   -800   
304    144    
96     400    
-528   -672   
-32    -112   
-816   -48    
0      -80    
32     -16    
96     -96    
144    -48    
16     -320   
48     80     
48     -1504  
16     64     
128    -80    
0      528    
112    64     
-80    -32    
-288   448    
208    -112   
-256   272    
48     -96    
-816   -48    
96     32     
112    -496   
-16    -16    
80     128    
256    -272   
48     -16    
288    480    
64     -16    
48     0      
-112   384    
80     -304   
304    384    
-480   -272   
240    -464   
-160   272    
320    432    
-448   16     
-48    64     
-32    -192   
128    -480   
-224   -224   
80     -336   
112    80     
-144   48     
32     -32    
-48    80     
32     -112   
0      32     
64     -144   
-64    32     
16     -32    
32     48     
-32    -416   
224    -128   
256    -224   
272    544    
-368   -80    
64     -320   
-16    112    
64     64     
-288   -80    
-48    -400   
-176   -240   
240    256    
-1504  96     
176    -112   
-32    64     
-48    -384   
48     -240   
16     -48    
176    48     
-64    96     
160    240    
-144   112    
-112   -176   
0      -176   
256    -32    
-192   80     
32     48     
-208   64     
0      -192   
0      432    
240    -16    
-96    160    
64     848    
-256   240    
-320   528    
-848   144    
-224   -320   
272    -112   
-176   -128   
-64    -96    
-16    -144   
-64    -176   
-80    -80    
112    -32    
-16    128    
-160   -128   
112    -32    
-112   64     
-16    272    
48     96     
-144   32     
-96    -32    
-128   96     
112    48     
-848   -128   
384    -80    
-320   -32    
160    160    
-160   16     
64     96     
-176   -48    
224    0      
-272   -48    
-224   -32    
-128   272    
144    -80    
48     -32    
-400   64     
64     112    
-336   32     
-48    112    
-80    32     
-160   -16    
160    0      
-64    112    
-32    -160   
-288   -64    
96     128    
32     64     
0      96     
-48    32     
32     48     
-80    48     
-64    0      
-144   192    
-208   96     
-1024  -112   
128    -16    
-80    -112   
16     32     
16     -32    
-64    16     
32     32     
-112   64     
272    448    
-384   192    
-224   240    
144    -96    
-112   16     
384    112    
-272   -80    
-320   -496   
48     240    
-32    48     
-176   -176   
-16    16     
64     176    
-112   192    
-32    64     
-16    16     
-64    -80    
-128   -48    
80     -240   
-96    48     
-160   -96    
272    336    
-80    -96    
272    144    
96     -160   
-240   -96    
112    0      
64     144    
-112   160    
128    96     
144    352    
-272   304    
64     208    
-64    176    
160    272    
-336   -32    
-16    -144   
-416   -96    
64     -64    
-448   -64    
-144   64     
256    176    
-48    -48    
80     16     
-112   32     
48     -32    
192    16     
16     128    
-16    -16    
-80    -48    
0      32     
32     48     
16     16     
64     64     
-576   -224   
32     16     
-176   112    
64     48     
32     112    
-160   -64    
-64    112    
64     0      
0      96     
32     16     
16     64     
-80    -128   
-80    -48    
-64    -32    
96     144    
32     176    
-272   48     
-32    64     
336    128    
-128   16     
-32    -16    
0      32     
-16    -32    
-16    32     
16     32     
64     0      
-336   -224   
96     96     
-176   -96    
48     96     
48     64     
0      96     
96     0      
-16    -16    
32     112    
128    112    
-64    48     
48     -48    
-64    144    
192    80     
-144   64     
0      -16    
-16    80     
-16    -96    
80     48     
0      64     
-80    -112   
32     48     
-112   80     
80     64     
-128   32     
80     -144   
560    336    
-192   336    
-288   128    
128    32     
-16    -32    
80     -48    
-64    -16    
64     528    
176    224    
-96    288    
48     16     
64     192    
176    240    
-64    -112   
16     112    
16     80     
128    112    
0      96     
32     -16    
-48    -96    
16     224    
32     464    
-32    320    
64     -16    
128    368    
-144   -320   
-96    -176   
128    352    
-80    -48    
48     176    
192    80     
-48    368    
32     368    
112    192    
-32    176    
-16    256    
32     256    
48     64     
32     144    
-160   80     
16     128    
80     32     
320    288    
-208   -176   
-96    80     
144    144    
0      64     
-48    -32    
96     128    
-32    -32    
-64    -80    
128    96     
-112   64     
96     288    
-64    -608   
80     656    
-48    96     
-32    -176   
-16    64     
80     -16    
48     304    
48     112    
-352   -384   
240    -224   
176    496    
-96    16     
-16    -272   
96     -2736  
176    -80    
-48    -160   
112    112    
224    0      
128    272    
144    480    
-96    128    
-176   -48    
-16    -48    
80     128    
-96    192    
-144   -192   
-48    -288   
-32    -80    
112    -656   
-112   80     
-48    592    
144    640    
-112   48     
32     112    
0      64     
32     -48    
-272   -272   
-48    64     
-400   -48    
128    32     
-64    16     
208    -288   
-272   272    
0      -64    
-96    -32    
32     -976   
-16    224    
48     160    
160    208    
-560   -944   
-96    -592   
144    96     
32     304    
-32    256    
16     -192   
192    224    
32     96     
-64    128    
96     -272   
32     -336   
848    -944   
-336   832    
176    -288   
-240   -528   
0      304    
0      240    
192    64     
208    432    
-432   -768   
-64    208    
160    512    
256    -304   
-64    512    
-16    -160   
-48    192    
352    -576   
-416   -304   
-112   -384   
64     336    
144    320    
-368   304    
96     -288   
32     -64    
32     368    
-96    -560   
336    144    
-32    -96    
112    -32    
48     -496   
32     48     
64     -64    
-16    192    
48     -16    
16     272    
-64    -128   
-192   -48    
-32    -192   
112    -192   
48     240    
-80    32     
-32    64     
192    320    
-48    288    
16     -208   
96     16     
80     448    
-32    -80    
-192   -320   
96     144    
64     64     
-64    -192   
240    352    
-224   240    
144    -176   
80     64     
-96    80     
272    144    
-32    224    
144    -80    
-224   -336   
304    -256   
-80    352    
96     128    
-16    -544   
176    -32    
-304   -592   
80     -688   
-16    192    
32     -832   
-80    -208   
-160   -608   
224    -80    
-48    256    
-64    -304   
16     240    
-96    32     
240    -288   
-192   48     
288    176    
-48    -96    
176    -672   
256    -48    
-208   16     
64     -144   
64     32     
-64    -176   
-64    -16    
112    192    
32     -64    
-160   -16    
0      -16    
128    -208   
16     32     
32     -304   
-32    96     
-288   -128   
96     -48    
-336   48     
-32    -48    
16     -224   
208    -144   
48     -48    
-64    -480   
224    336    
-48    -160   
-48    32     
128    -96    
16     32     
128    96     
0      -80    
16     -48    
16     -64    
48     80     
-16    -368   
-32    -112   
32     -336   
128    64     
-128   -448   
48     32     
368    -432   
-432   112    
80     48     
16     48     
64     -48    
0      160    
-144   32     
64     -64    
-448   -192   
256    16     
-352   -64    
-96    -32    
96     0      
16     -16    
-16    -96    
32     -496   
-32    16     
-16    -720   
-144   -128   
64     208    
48     352    
-16    256    
-32    -144   
-144   16     
48     64     
-208   128    
96     -80    
-464   -272   
304    -288   
-128   208    
176    -384   
-48    48     
176    -928   
-80    160    
-80    -32    
-96    -368   
96     -272   
-176   -352   
16     -272   
-64    32     
-496   -224   
192    -96    
-1008  -160   
256    208    
-48    64     
48     -16    
-64    256    
-112   -432   
112    128    
-256   16     
208    256    
224    176    
128    32     
-192   0      
176    -16    
-144   32     
144    -32    
-96    64     
144    -16    
-80    -16    
32     -96    
464    224    
-96    -288   
144    -272   
0      -32    
176    -64    
-160   -32    
48     -112   
-176   -160   
16     -64    
-16    144    
160    0      
-112   -16    
32     32     
96     112    
96     -240   
64     80     
256    192    
-416   -32    
144    144    
-192   48     
48     -128   
-80    -112   
32     16     
-96    -224   
240    32     
-128   -16    
288    96     
-464   -208   
224    160    
-672   -208   
-288   128    
80     32     
-16    96     
80     -32    
-512   -16    
-160   -176   
-256   -96    
-48    -80    
-64    64     
240    288    
-656   96     
-32    144    
-320   -64    
64     112    
-112   -32    
-160   -128   
144    -32    
-160   48     
-176   64     
-144   80     
-240   64     
-32    96     
-96    80     
-1632  -96    
0      0      
32     -144   
128    32     
0      -80    
16     112    
32     0      
16     0      
-32    -16    
64     64     
-192   16     
48     16     
-80    32     
-128   -48    
-160   0      
-608   160    
-128   -32    
-96    -176   
320    176    
16     48     
-80    64     
-128   -208   
160    192    
-80    144    
16     96     
48     16     
-128   128    
96     96     
-176   144    
288    208    
-464   -224   
224    96     
-352   256    
48     336    
-64    176    
64     80     
0      320    
48     336    
64     64     
-96    48     
-16    0      
0      48     
-96    -64    
-112   -32    
-32    96     
-176   48     
32     64     
-256   -96    
32     64     
-48    -48    
80     128    
224    -32    
-224   -256   
-32    -320   
64     304    
-16    384    
-144   -320   
-48    -528   
80     512    
-16    -80    
-176   -272   
-48    144    
-608   -352   
32     64     
-48    -240   
112    -16    
-64    256    
-144   -48    
-32    -16    
16     96     
-64    176    
-16    208    
-64    -64    
16     80     
-16    64     
144    80     
80     -64    
-320   160    
176    -16    
80     80     
-192   80     
64     -96    
-128   0      
224    176    
-304   -176   
192    -80    
0      384    
192    624    
-16    96     
48     -16    
-128   0      
48     32     
-48    0      
96     48     
-16    48     
64     80     
-128   64     
-32    16     
-48    48     
80     32     
-80    16     
16     32     
-96    16     
64     96     
64     192    
-144   -80    
-272   -192   
-128   -256   
160    32     
-16    48     
64     48     
16     208    
144    256    
160    96     
272    480    
32     464    
80     256    
416    240    
32     240    
224    224    
-80    0      
-128   -288   
112    -512   
-112   -192   
304    192    
688    496    
-240   720    
96     144    
-208   -128   
320    32     
0      112    
-336   -272   
544    -320   
96     -176   
624    288    
-368   -192   
224    240    
0      272    
288    400    
-32    528    
-272   32     
-32    32     
-32    96     
-208   48     
-224   -336   
-224   -48    
64     80     
-288   -64    
-64    -176   
304    304    
96     352    
-192   -432   
208    64     
192    576    
-272   -480   
192    -48    
-496   -656   
352    -240   
-64    464    
48     176    
-32    -208   
-144   400    
192    192    
-96    -96    
-16    208    
96     0      
-16    560    
64     -160   
208    304    
-128   -32    
-48    192    
-32    -128   
-432   -624   
80     128    
704    1040   
-848   -576   
224    -448   
160    -224   
384    64     
128    320    
-112   -48    
16     -720   
192    176    
64     368    
192    304    
-176   -64    
176    -432   
48     -272   
144    16     
-96    240    
0      112    
-32    -16    
-48    64     
48     0      
-64    -32    
-208   -288   
16     -368   
240    144    
-96    16     
48     96     
160    48     
-208   96     
240    240    
-112   16     
256    176    
-224   -32    
-16    96     
160    192    
48     80     
-128   0      
160    160    
-208   -48    
-112   -16    
-144   -832   
240    160    
0      -16    
48     208    
112    304    
-16    32     
-48    -32    
48     -32    
-96    -128   
0      112    
-128   160    
48     96     
-80    480    
112    32     
-64    32     
32     -1040  
16     112    
128    80     
-48    0      
112    112    
96     96     
80     208    
96     -16    
208    160    
-192   80     
144    144    
-176   224    
256    304    
-48    -64    
-48    112    
-16    -704   
48     48     
32     -1008  
160    -96    
32     -128   
-16    64     
-16    80     
-160   -176   
176    -96    
224    0      
-64    48     
-16    -32    
-208   -304   
112    0      
128    192    
-48    -96    
64     144    
0      -432   
-48    0      
-16    -96    
16     80     
64     48     
32     16     
-80    16     
144    112    
16     128    
48     -48    
-64    112    
96     0      
-32    16     
64     -416   
128    144    
160    -208   
-144   96     
96     64     
128    192    
48     32     
80     64     
0      96     
80     112    
-80    144    
80     272    
160    16     
-96    160    
288    64     
-96    0      
192    96     
304    80     
-368   80     
256    -48    
-32    64     
-96    -128   
-80    0      
160    -144   
-48    96     
16     272    
144    -192   
192    144    
-32    -304   
64     128    
48     0      
48     96     
-16    -176   
-112   -128   
64     -1168  
-32    80     
128    -48    
144    16     
-144   256    
304    -16    
-96    -1872  
48     -16    
32     -416   
128    -320   
144    128    
-16    -160   
32     -16    
80     -336   
48     48     
0      -64    
128    -880   
0      176    
-96    32     
240    -192   
-48    -96    
240    -256   
-112   -192   
160    -608   
224    304    
-64    32     
-16    -272   
176    80     
-128   -96    
-128   -752   
176    48     
64     144    
96     144    
-16    -336   
-80    -448   
-48    -208   
96     -144   
96     0      
384    464    
-352   336    
0      -688   
-16    -48    
80     144    
272    272    
-400   96     
32     -96    
80     0      
352    336    
-496   -80    
32     -112   
-80    32     
112    -96    
0      -32    
128    -80    
-16    -288   
-32    -352   
112    32     
16     -592   
-208   -128   
64     128    
32     64     
-128   -96    
48     16     
-112   -80    
-16    64     
208    144    
-256   -32    
192    -112   
-240   80     
176    -64    
-160   -208   
32     -32    
32     -416   
-176   16     
272    -80    
112    128    
-32    -64    
-144   -32    
128    -224   
192    -288   
144    16     
96     160    
-544   48     
112    -64    
96     272    
160    -48    
-352   16     
224    -640   
-96    80     
-112   -736   
0      32     
-48    400    
96     32     
-432   -144   
224    -112   
-176   -48    
0      -96    
160    48     
-208   128    
-720   0      
16     -112   
0      -112   
-16    -816   
32     176    
32     -1584  
-48    -64    
112    32     
-80    -64    
-128   0      
128    -176   
-400   -384   
32     80     
-48    304    
-16    -128   
-576   256    
-160   64     
0      -176   
192    448    
48     208    
112    -368   
48     16     
-480   -304   
64     -80    
-288   416    
-64    -112   
160    256    
64     -224   
-176   -288   
-96    -256   
0      96     
64     160    
16     48     
-64    -128   
176    0      
-80    -512   
96     0      
-240   0      
464    96     
-320   -16    
64     -16    
-96    -64    
64     0      
-128   -32    
288    256    
-480   448    
80     -176   
0      -448   
-1104  -128   
176    336    
-176   224    
-160   -32    
-240   -176   
80     -80    
-128   -128   
192    -64    
80     192    
32     288    
-160   0      
256    112    
-160   160    
-784   -64    
64     128    
-192   -208   
0      -16    
96     128    
-112   0      
-48    32     
-496   112    
80     592    
-368   64     
-128   -32    
16     16     
-96    0      
128    -160   
-144   -48    
-48    -272   
352    304    
16     416    
-48    208    
352    400    
-256   16     
-16    -96    
-96    -128   
-32    48     
-176   32     
32     32     
-1072  0      
-32    -16    
-272   -224   
-48    0      
-112   -80    
16     64     
0      -112   
-128   32     
80     64     
-144   -128   
128    -96    
-368   -64    
80     -144   
-80    -96    
-144   -48    
-384   -304   
0      32     
-208   -192   
112    -192   
-48    160    
-64    -368   
-304   -400   
240    112    
-240   224    
128    32     
-16    64     
-224   -64    
-128   -224   
-160   112    
-16    -16    
-400   -352   
288    288    
-1088  240    
-48    -224   
-64    -208   
192    128    
-32    32     
-320   448    
560    -48    
-224   176    
-256   -528   
256    -336   
208    624    
-48    176    
-144   -112   
144    304    
-112   288    
-800   -224   
64     96     
-240   -144   
-16    -112   
-96    -64    
432    160    
-224   432    
-48    -48    
48     32     
-80    -64    
16     240    
224    80     
-160   0      
64     64     
-112   -400   
32     336    
160    464    
-112   32     
-160   -320   
-16    -64    
176    160    
-176   256    
32     48     
-112   144    
-80    128    
48     -160   
-176   16     
-80    -16    
-208   -80    
-192   -464   
-160   -288   
144    -32    
32     96     
-48    32     
-32    80     
-32    192    
-48    32     
-80    64     
-96    -32    
-48    32     
-32    0      
-64    -48    
-16    80     
-96    304    
-32    224    
-128   544    
80     320    
-256   48     
-64    -80    
80     64     
-256   48     
32     16     
128    112    
-48    32     
-288   240    
208    -64    
-144   32     
160    112    
-144   160    
192    160    
-176   -16    
-32    32     
16     128    
48     96     
-128   16     
48     96     
32     -16    
-96    48     
16     128    
-80    -16    
-80    0      
-64    -32    
80     96     
16     -16    
-128   64     
-176   -32    
-112   -16    
-16    96     
80     32     
-128   48     
-48    80     
64     256    
-224   16     
-16    96     
176    400    
-288   128    
-32    -80    
-64    96     
32     32     
-16    64     
112    176    
32     144    
-32    -112   
0      80     
96     32     
-64    -48    
32     32     
64     112    
-144   80     
64     144    
32     32     
-160   -48    
144    -48    
-224   48     
128    32     
16     -64    
-32    80     
224    144    
-96    80     
-144   -16    
272    48     
80     304    
208    0      
-288   16     
352    80     
-192   16     
48     48     
48     80     
-16    144    
-64    -256   
192    208    
16     80     
-144   -48    
112    32     
16     96     
-32    16     
48     32     
48     64     
128    112    
-256   -16    
160    80     
-80    16     
64     112    
-96    -192   
160    -1760  
96     96     
112    32     
64     64     
112    112    
64     32     
80     96     
-48    32     
0      16     
288    208    
-272   160    
176    240    
-128   16     
128    16     
192    -96    
-112   -384   
192    32     
-64    0      
208    0      
-208   192    
320    320    
16     192    
32     64     
64     16     
32     -32    
-32    48     
64     -64    
-64    -80    
-32    144    
96     352    
-128   -16    
16     80     
112    128    
-16    0      
208    16     
-64    112    
256    432    
-192   208    
-112   128    
16     48     
64     -32    
160    96     
-176   16     
176    -16    
80     112    
-80    -224   
320    -64    
-112   -1680  
224    128    
96     160    
-32    80     
80     112    
160    160    
-64    -160   
128    64     
-48    32     
192    240    
112    128    
80     -16    
-48    32     
-80    -416   
144    0      
80     -272   
208    208    
-112   -800   
80     16     
-48    16     
160    -32    
144    144    
-16    112    
-400   -432   
32     -176   
144    144    
0      -16    
-64    32     
96     -256   
-80    16     
112    -64    
-144   224    
-96    -1344  
16     -48    
-48    -1520  
96     112    
-160   32     
112    80     
0      80     
32     -224   
-96    176    
64     -192   
-48    32     
32     -384   
-96    -96    
128    -208   
-176   -496   
-32    -1168  
96     128    
-112   176    
64     32     
-224   -176   
208    -240   
32     48     
80     448    
16     192    
176    128    
176    160    
32     -32    
-16    -96    
240    -240   
192    144    
-32    -1136  
256    160    
-128   112    
-48    128    
64     -32    
128    176    
-128   -112   
192    -320   
224    32     
128    -16    
-32    128    
96     -160   
-240   -336   
-64    176    
32     432    
16     272    
48     592    
-112   176    
-112   -208   
16     528    
-80    -112   
-16    -384   
-64    -48    
48     -320   
16     16     
80     -1392  
64     208    
112    160    
-176   -320   
112    -192   
224    16     
144    -704   
-48    432    
128    -320   
112    160    
-128   48     
64     -672   
-64    -16    
80     -16    
48     -368   
32     -1168  
-32    336    
128    -704   
-32    -96    
112    176    
32     -48    
32     -208   
272    352    
256    176    
-160   -208   
-208   224    
224    -336   
-1680  16     
224    -160   
-80    -80    
-96    -64    
272    -48    
-48    -1776  
64     -160   
-16    -1552  
80     32     
176    -32    
-160   80     
160    -80    
32     -96    
-384   -48    
240    -16    
-608   64     
96     112    
-224   -208   
160    -144   
16     -48    
160    -432   
-176   -368   
112    -1056  
0      160    
-16    -32    
144    0      
32     32     
144    -176   
-256   -192   
224    -272   
-288   -96    
176    -256   
96     -112   
96     -304   
-16    -48    
176    0      
48     96     
112    -656   
-48    240    
32     -80    
-64    -16    
-160   -112   
-32    -48    
32     0      
192    288    
-592   32     
-16    -304   
-464   -752   
224    -304   
176    288    
64     -144   
-96    0      
48     16     
80     32     
16     -1168  
16     112    
-192   -16    
352    96     
-160   80     
-112   -256   
-144   -112   
-64    48     
-240   -32    
32     64     
-240   96     
80     -80    
-48    -96    
192    -336   
0      592    
80     -512   
-64    -240   
32     48     
0      32     
-48    -224   
64     -192   
80     272    
128    -16    
-48    528    
-48    672    
32     176    
-32    304    
-128   -128   
384    16     
-128   48     
128    -640   
80     256    
32     -336   
64     32     
-80    320    
-48    -272   
0      128    
64     -160   
-144   224    
16     -304   
-96    -288   
-128   -80    
112    304    
-64    -160   
-32    -336   
-64    -496   
0      -384   
-16    -64    
64     -48    
-112   208    
224    400    
-160   160    
32     -80    
-48    -128   
-96    -432   
304    -624   
-272   -256   
240    64     
-1008  -16    
176    528    
-304   320    
-1056  0      
0      -192   
-784   -144   
-16    224    
-224   96     
-144   -16    
224    -64    
64     112    
-656   -144   
-16    -48    
-208   -272   
64     16     
-352   -256   
224    416    
-96    -80    
80     -128   
16     192    
-336   -48    
-240   64     
-160   0      
-288   -16    
320    -112   
-144   80     
48     -112   
-336   96     
160    -160   
-96    64     
-48    -96    
16     96     
-144   112    
-48    64     
-160   16     
16     16     
-96    -16    
-96    0      
304    16     
-1088  80     
-112   0      
-96    -64    
320    192    
-224   192    
-160   176    
176    64     
-160   -256   
-48    32     
-160   0      
0      48     
0      128    
-96    80     
-96    -48    
-96    16     
-992   -224   
-208   16     
0      64     
-32    80     
32     0      
160    128    
-192   0      
-48    -144   
128    112    
-80    16     
-16    80     
64     -16    
-16    -48    
-32    0      
128    64     
-544   -144   
96     128    
112    0      
96     144    
-160   -64    
-32    -96    
-32    -32    
-16    80     
16     0      
-80    48     
32     64     
-48    16     
-192   -112   
80     -32    
-112   -48    
48     -96    
-48    48     
-672   -32    
16     -128   
-160   -96    
32     96     
32     16     
0      48     
48     96     
-48    32     
48     16     
-400   -224   
272    -240   
-224   272    
240    64     
-240   -80    
80     80     
-272   0      
272    224    
-368   96     
0      -48    
48     192    
80     -16    
-112   -144   
0      80     
176    64     
-176   80     
128    192    
-128   -80    
272    80     
-256   -48    
16     -112   
-288   -160   
96     112    
48     96     
-16    32     
48     64     
48     96     
-48    -144   
48     32     
48     48     
64     208    
-128   64     
48     112    
96     112    
-144   -112   
64     16     
-16    48     
112    128    
64     48     
0      -16    
-80    0      
176    208    
-48    32     
-48    112    
64     80     
-80    16     
-144   208    
64     -64    
128    32     
-48    0      
-368   -384   
224    -80    
112    224    
-336   80     
176    48     
-64    48     
-240   144    
304    80     
16     -48    
-208   64     
-112   96     
-208   112    
144    -48    
0      160    
-48    96     
-192   -16    
80     -80    
64     -16    
16     64     
416    400    
-272   256    
-48    16     
-32    16     
80     32     
16     32     
-32    96     
32     -128   
-144   -144   
112    64     
-32    128    
-176   96     
-16    64     
144    48     
-32    208    
80     96     
-112   32     
-32    -144   
96     -256   
64     16     
144    112    
-208   16     
32     112    
80     256    
96     32     
-112   240    
-128   176    
224    -48    
32     -32    
128    240    
80     0      
272    352    
80     816    
-128   240    
16     32     
-16    96     
-272   -112   
208    16     
-48    -128   
144    112    
-48    -16    
176    208    
-32    176    
-144   272    
48     160    
-80    128    
32     128    
-32    -16    
288    224    
-112   384    
80     336    
-144   160    
-32    -128   
160    -512   
16     -32    
288    32     
-320   -672   
-16    32     
80     -16    
96     -144   
-176   -496   
0      -320   
192    32     
-48    -16    
32     -96    
80     48     
0      48     
80     176    
80     352    
128    352    
-432   -320   
-288   -784   
-160   -224   
176    -48    
-16    192    
32     112    
0      -48    
64     -336   
208    96     
-64    -192   
224    -144   
-192   160    
160    -192   
-96    128    
-80    -288   
80     -80    
128    256    
144    112    
-128   -2144  
144    160    
16     0      
64     48     
-16    80     
64     64     
32     32     
16     48     
-64    -160   
144    128    
-16    112    
48     112    
48     -64    
-96    -176   
368    784    
-96    -832   
-48    -224   
80     0      
80     240    
64     80     
112    112    
0      80     
16     272    
-16    -544   
-16    -192   
0      -224   
128    -112   
64     448    
16     -352   
192    96     
-80    -576   
-80    -144   
224    -144   
-80    256    
80     -432   
16     -192   
-96    112    
48     -144   
160    64     
-48    192    
96     16     
-16    -80    
64     64     
112    -224   
-96    64     
144    32     
16     32     
64     -368   
-64    16     
384    368    
-128   224    
-112   -128   
208    -208   
-32    208    
208    -48    
-128   64     
80     -64    
-32    16     
112    48     
96     48     
-256   -208   
112    -432   
32     112    
-112   -320   
64     -240   
144    384    
0      64     
224    96     
-32    192    
304    -368   
-80    96     
16     -160   
128    144    
-64    -272   
176    112    
48     32     
-16    -128   
112    -256   
64     368    
512    528    
-224   512    
-112   -256   
160    -272   
-144   -880   
848    1088   
-416   784    
32     -752   
-160   -400   
128    -96    
96     176    
144    0      
-16    176    
96     112    
-32    -208   
16     144    
128    -1776  
48     320    
32     -1232  
32     -64    
160    128    
112    -80    
0      -240   
96     -1248  
-224   -240   
352    -112   
16     320    
112    0      
0      -272   
320    -240   
-80    192    
192    -112   
-224   -288   
192    -224   
32     -208   
0      -272   
-80    -528   
192    -80    
80     -688   
0      48     
0      -384   
-64    -16    
224    -496   
-112   32     
352    16     
-352   224    
176    -32    
-32    -96    
0      -112   
0      64     
-1248  -64    
64     -96    
16     -128   
336    208    
-320   -320   
80     -608   
256    -80    
-64    -352   
128    224    
96     -32    
160    176    
64     -16    
-16    -272   
224    -16    
528    368    
-448   256    
-16    48     
80     160    
48     80     
32     -16    
224    -240   
-48    -80    
112    16     
64     384    
176    304    
-320   32     
288    48     
64     -48    
-240   -48    
32     0      
-160   -160   
48     -384   
-400   -64    
224    -224   
-336   -112   
48     -256   
112    64     
64     -576   
336    288    
-80    32     
-64    64     
-192   -32    
144    128    
240    128    
-240   -208   
-208   -64    
336    64     
-80    -48    
16     -96    
96     48     
48     -16    
112    112    
0      -320   
144    208    
48     -832   
-160   -32    
96     32     
304    -96    
-240   -144   
16     -112   
-608   -160   
80     -240   
-304   16     
112    16     
-96    -16    
32     -192   
-32    32     
-64    -256   
32     -64    
80     -1600  
272    -128   
64     16     
128    0      
-560   -32    
64     -128   
32     96     
-64    -16    
-160   80     
288    -32    
-144   -64    
128    -192   
-64    112    
48     -64    
-224   48     
80     0      
192    -16    
-64    48     
128    -16    
-96    0      
128    32     
-32    -64    
32     48     
32     -32    
-144   -272   
48     32     
80     -96    
0      64     
-128   -16    
-32    64     
-64    48     
-1040  -176   
-144   -16    
64     -80    
-208   208    
512    288    
-304   64     
80     -112   
-112   0      
128    -112   
-48    48     
0      -48    
256    128    
-384   -224   
-368   -288   
-16    -16    
-704   160    
-208   32     
-304   -32    
272    240    
-448   128    
-272   -192   
192    -160   
-112   80     
-144   -176   
208    192    
-208   -272   
-16    144    
-192   -272   
-112   -32    
-64    0      
-80    -176   
-144   -48    
48     -144   
176    224    
-1312  272    
-112   80     
-48    176    
128    48     
-144   -64    
16     96     
-48    -224   
-48    176    
144    192    
-224   128    
80     48     
-160   16     
-32    32     
48     48     
-208   80     
-768   -80    
64     112    
-1072  -16    
0      288    
48     -48    
0      48     
48     -64    
-32    128    
16     0      
-112   32     
-160   96     
0      96     
-16    48     
-176   -32    
32     0      
-352   160    
160    96     
-656   -80    
112    32     
-48    -96    
-160   16     
160    -112   
368    272    
-352   176    
-64    32     
96     48     
-240   144    
48     -400   
224    -432   
-208   -128   
384    112    
-32    80     
-544   -464   
256    96     
-224   320    
-16    32     
0      -144   
-160   0      
-32    32     
-96    16     
96     128    
-48    80     
-128   32     
-80    96     
-144   48     
-160   -112   
48     304    
-48    -32    
-64    -128   
-560   80     
128    144    
-112   160    
-96    -16    
0      -112   
64     -144   
-80    -240   
288    144    
-144   352    
208    160    
80     96     
-176   64     
80     64     
-160   -48    
0      192    
-224   -112   
32     256    
0      0      
-16    112    
16     80     
160    368    
-160   -144   
96     -432   
-224   32     
240    224    
-128   -176   
144    -320   
0      224    
-176   112    
160    -64    
-320   -96    
48     80     
192    160    
-144   -560   
96     368    
-48    -144   
-80    -128   
-80    304    
-112   16     
128    112    
-176   112    
-48    16     
-64    -48    
-432   192    
80     -224   
96     192    
-288   496    
48     -144   
-144   -32    
-96    240    
-80    -48    
-208   -160   
-16    -368   
240    0      
128    416    
-176   208    
-320   -608   
256    -208   
112    320    
0      368    
-112   -384   
192    160    
-64    496    
-32    -464   
64     -32    
-64    48     
128    -240   
256    448    
-240   144    
-64    -32    
48     80     
-48    -48    
128    480    
-144   -48    
48     112    
240    80     
-144   80     
128    16     
0      64     
-16    0      
64     32     
208    448    
160    560    
-176   96     
288    -80    
160    -160   
-400   80     
144    64     
-112   -240   
-64    80     
160    128    
-192   -128   
-32    -48    
32     -368   
-272   -400   
96     -208   
256    832    
0      528    
48     128    
-112   96     
96     240    
-160   160    
48     16     
48     16     
64     128    
-160   -304   
320    752    
112    304    
-80    -48    
-144   -96    
64     -16    
288    224    
32     16     
-192   96     
48     -16    
80     144    
-80    0      
64     128    
64     48     
16     -16    
16     64     
64     320    
32     224    
32     -176   
-112   176    
80     -128   
-16    -64    
288    1408   
-336   -128   
96     -640   
112    336    
0      192    
160    -16    
-64    272    
32     -1696  
304    288    
-352   -176   
192    80     
32     144    
32     112    
64     400    
-112   96     
176    160    
-128   -64    
32     -624   
336    448    
-80    -304   
96     -96    
112    112    
-64    -864   
80     16     
144    0      
144    736    
-16    -96    
-160   -192   
64     32     
304    480    
-176   352    
48     320    
-128   -160   
320    128    
-160   -64    
80     -80    
-112   32     
112    -288   
224    368    
-192   -848   
176    96     
-64    64     
128    160    
-112   96     
32     80     
80     144    
-96    496    
208    320    
-80    48     
144    80     
-64    -176   
256    48     
-32    -240   
64     -48    
-16    -1056  
32     160    
0      -240   
-16    288    
272    80     
-16    16     
96     -64    
16     48     
-64    16     
64     48     
112    32     
48     -240   
96     64     
0      -160   
192    -16    
128    -928   
-128   96     
368    -336   
-112   96     
224    96     
-16    192    
112    176    
-112   64     
208    160    
-240   -288   
288    80     
-128   16     
48     0      
112    -192   
64     48     
32     -128   
64     -96    
224    -272   
-320   96     
432    128    
-368   96     
96     256    
288    160    
-160   -32    
224    -16    
96     160    
112    -816   
-128   144    
64     -64    
-144   64     
-128   -176   
-144   32     
64     -160   
160    288    
48     176    
192    144    
-96    176    
0      32     
224    144    
112    32     
16     272    
-32    -80    
48     32     
144    -48    
-32    0      
-112   -240   
-48    -160   
-192   -400   
160    144    
-80    -64    
-144   144    
-48    224    
-32    -336   
0      -192   
-80    -160   
-128   -80    
-16    -32    
-96    96     
48     -64    
64     16     
-64    -432   
336    112    
320    240    
0      -240   
-32    192    
208    -304   
48     32     
-1136  -192   
80     -208   
80     -64    
128    48     
96     -96    
272    -1360  
-32    -160   
80     112    
176    -32    
-192   0      
224    32     
-48    -608   
64     -272   
176    -32    
192    64     
-400   -32    
128    16     
160    -80    
176    -48    
-112   -112   
128    -80    
-48    0      
16     -224   
176    16     
-112   -80    
-16    -64    
-96    -80    
144    96     
-32    -176   
-32    48     
128    32     
-96    -192   
-496   80     
-128   -192   
128    48     
128    -48    
32     32     
48     -112   
16     16     
96     -240   
32     80     
384    400    
-368   192    
80     -64    
0      -48    
-48    -64    
-64    -112   
-304   -64    
80     -48    
16     -160   
48     -144   
32     -176   
0      -32    
-80    16     
32     -464   
96     112    
224    176    
-320   112    
64     144    
-48    16     
-112   -128   
48     -320   
-176   -32    
288    32     
-1568  32     
112    -64    
-64    0      
368    128    
-288   352    
-64    -208   
64     -112   
0      -208   
-16    0      
16     96     
-16    0      
64     80     
80     144    
-128   160    
-144   -384   
-560   -208   
96     -144   
-400   80     
-16    -32    
32     400    
-128   -240   
-96    -944   
208    0      
176    -224   
-192   -96    
272    -112   
0      96     
224    -96    
-736   144    
288    -80    
-592   80     
64     -80    
-464   -112   
176    -128   
48     -32    
16     -704   
112    128    
-320   -64    
-64    -608   
-176   176    
128    224    
-160   80     
-48    -128   
-96    -48    
80     32     
-112   -32    
128    64     
80     160    
-16    -144   
-96    -496   
208    -176   
-64    48     
-48    -848   
272    656    
-256   96     
16     -208   
192    848    
-144   -608   
-96    64     
112    -176   
-144   48     
0      -128   
80     160    
64     320    
32     -448   
-704   -160   
288    576    
-448   112    
-480   -672   
-80    16     
176    -16    
64     80     
-160   -112   
48     -464   
112    320    
-224   -160   
-1120  -608   
96     448    
128    -320   
80     304    
-224   -160   
16     -128   
-48    224    
48     128    
-176   176    
-96    -64    
-176   -96    
-784   -48    
-64    -112   
-176   -208   
-48    -144   
-224   -112   
-16    -48    
192    -336   
176    208    
48     192    
208    336    
-96    416    
0      240    
32     96     
-704   -320   
192    -416   
-752   16     
-96    96     
32     -16    
-256   32     
128    -48    
-288   48     
-96    -256   
-80    -224   
-144   -144   
32     160    
208    448    
-288   192    
-112   384    
-368   -416   
-224   -128   
48     96     
192    672    
-1584  -48    
320    -208   
-320   224    
-80    -144   
-144   -528   
64     16     
112    480    
48     -176   
32     -560   
-160   96     
96     384    
-112   -112   
-64    416    
96     160    
-176   -16    
-368   -128   
-32    32     
16     -304   
-80    -48    
192    480    
-144   -64    
-160   32     
-144   160    
-112   -128   
-64    32     
-208   -240   
128    208    
-128   96     
-192   -144   
-64    128    
-512   -160   
80     96     
-16    -64    
176    112    
-304   16     
208    -48    
-128   304    
416    704    
-960   -1024  
256    -96    
96     560    
-288   -512   
160    -464   
-144   272    
96     80     
-16    400    
-48    32     
-1280  -768   
96     656    
192    -144   
-272   544    
0      -160   
144    80     
-192   64     
64     -80    
-192   240    
272    -336   
-32    -80    
-144   -240   
192    224    
-160   64     
32     0      
-272   96     
-64    64     
96     -208   
-192   112    
192    48     
-112   80     
-96    32     
-32    48     
0      64     
-48    48     
32     96     
304    48     
-416   -336   
16     -208   
160    64     
-208   192    
96     144    
304    336    
-272   416    
-128   208    
144    320    
-160   368    
-208   -80    
16     64     
272    384    
-256   304    
-160   112    
16     48     
-336   -64    
208    80     
0      16     
-64    64     
16     128    
-80    16     
-16    48     
240    48     
-96    -16    
0      128    
16     176    
48     80     
-32    64     
-112   -192   
80     96     
-80    -48    
224    32     
32     64     
32     208    
224    176    
-192   -32    
96     128    
112    272    
32     144    
-160   32     
128    176    
-240   -64    
16     64     
-128   0      
128    0      
-320   0      
224    144    
-96    64     
32     -16    
-16    64     
272    336    
-160   0      
-160   16     
400    16     
-416   0      
352    0      
-224   64     
384    464    
-272   320    
-16    144    
-192   -96    
-32    0      
128    80     
48     176    
96     32     
0      0      
64     -16    
-32    0      
48     64     
-144   -16    
-16    -32    
48     -16    
-112   -112   
64     -32    
-16    96     
-160   16     
368    160    
-144   64     
112    112    
64     -16    
-176   160    
192    128    
-240   64     
96     16     
32     0      
96     32     
160    16     
80     160    
192    176    
-80    240    
-96    240    
-96    96     
-112   -128   
-400   -544   
-64    -1056  
-64    -608   
160    -160   
-240   -48    
416    176    
-320   -256   
48     32     
112    144    
192    256    
128    256    
32     -64    
400    80     
240    -2368  
64     -16    
96     160    
96     80     
128    0      
-176   -288   
64     -48    
-176   208    
-48    0      
0      368    
192    80     
64     32     
16     48     
32     -80    
-48    -32    
-48    -336   
288    176    
-176   16     
-448   16     
0      -16    
16     48     
64     160    
-176   96     
-48    -192   
144    64     
-176   32     
112    80     
112    112    
16     -288   
112    -32    
32     -176   
192    112    
64     -1712  
-176   112    
256    16     
-80    64     
-48    -192   
-96    48     
144    16     
128    112    
-96    16     
176    128    
-128   112    
96     96     
128    240    
-48    -144   
-16    -32    
0      -784   
-16    160    
224    48     
0      48     
-32    64     
112    96     
64     128    
-32    208    
-96    96     
128    -16    
160    128    
-32    16     
176    80     
16     -112   
160    48     
112    -160   
80     0      
-96    -464   
240    256    
-160   -16    
160    128    
-16    32     
112    80     
96     32     
-64    0      
32     64     
32     -32    
32     16     
32     -688   
16     192    
160    -32    
-64    32     
-16    -32    
160    -16    
-96    -16    
208    208    
176    96     
-112   80     
192    32     
0      -80    
144    48     
96     -320   
-112   96     
-128   -576   
208    -48    
-16    -16    
160    288    
-16    -144   
-112   -160   
304    96     
16     -224   
-80    -240   
128    -160   
48     -144   
80     -160   
240    336    
-96    -80    
48     -160   
256    -144   
112    288    
176    96     
48     -64    
-16    -192   
224    80     
-80    -160   
176    -144   
16     240    
-352   -304   
48     -880   
176    -64    
160    -16    
16     -160   
48     816    
-128   -496   
192    752    
-80    112    
192    -528   
-336   -336   
-160   -704   
48     208    
112    -576   
-224   144    
-768   -160   
80     80     
48     112    
96     -144   
0      -80    
224    -576   
48     -32    
64     -96    
112    160    
64     -144   
128    48     
80     -112   
48     0      
16     -112   
240    -192   
-160   -80    
112    -432   
80     -16    
-32    -224   
224    -144   
0      -592   
240    224    
32     -416   
32     32     
288    176    
-400   32     
240    -32    
-160   112    
48     240    
16     -16    
96     48     
80     -48    
-1488  -80    
0      -64    
368    176    
0      -528   
336    112    
-32    -864   
-384   -336   
160    -160   
112    16     
-192   -160   
80     80     
-320   -144   
208    80     
-416   -112   
304    -64    
-752   -256   
-16    -16    
80     -48    
144    -96    
128    -208   
-80    -336   
-224   -320   
320    -704   
240    256    
96     96     
64     -496   
-48    128    
240    48     
-256   -32    
16     48     
96     176    
-128   -32    
-800   -368   
128    -368   
-32    64     
96     240    
-240   496    
224    -624   
48     144    
-336   -80    
224    -80    
-304   -272   
96     0      
-256   -320   
192    96     
-112   -64    
336    -16    
-1904  112    
64     -560   
352    144    
0      -192   
96     96     
16     0      
-272   -432   
304    272    
0      -464   
112    464    
16     0      
176    -16    
288    400    
-256   -320   
-16    48     
16     -384   
112    272    
32     -288   
-80    400    
192    -1344  
160    464    
-192   496    
-64    -560   
32     304    
-64    -336   
224    96     
-128   64     
-160   -576   
608    336    
-176   112    
64     96     
16     -160   
-176   -192   
320    -16    
-112   304    
336    -272   
64     -112   
80     -176   
64     64     
-32    -288   
16     -304   
-64    -48    
16     -128   
80     16     
-240   -80    
-240   0      
-48    -592   
-32    176    
-880   -64    
-48    -608   
-288   -304   
-576   336    
-16    64     
-592   96     
-208   144    
-512   -304   
-320   -400   
192    -48    
-80    -32    
0      -112   
-208   336    
-592   -32    
-96    80     
128    -16    
32     80     
96     240    
-320   64     
16     304    
-208   16     
-176   48     
272    -32    
-80    80     
-1600  -80    
16     48     
-208   -80    
16     64     
128    32     
-144   48     
80     -80    
-272   96     
-176   160    
-176   208    
-32    176    
-176   -32    
-112   0      
-32    80     
-272   32     
-48    96     
-368   -64    
16     32     
80     128    
-32    16     
0      -16    
-192   -160   
176    96     
-288   160    
32     80     
-32    64     
-48    0      
0      224    
80     32     
-176   64     
-208   -48    
16     112    
-288   32     
224    368    
-384   128    
-80    144    
-80    -288   
32     -64    
0      240    
-112   -16    
0      32     
-48    -80    
0      176    
-144   -48    
96     16     
-128   128    
160    64     
-976   64     
32     160    
-160   -128   
48     96     
64     -336   
-32    32     
-96    16     
16     128    
-48    16     
-160   -320   
128    -96    
96     -64    
-160   -64    
-144   -128   
-128   -64    
-288   0      
-48    128    
-272   -240   
16     -208   
-144   32     
80     16     
-96    16     
-64    16     
-144   96     
112    400    
-160   144    
-176   -32    
-112   -32    
-176   -48    
176    96     
-80    -112   
96     -48    
-288   0      
176    80     
-48    48     
-128   -32    
112    112    
-112   112    
176    16     
-320   -80    
80     -48    
-48    16     
-80    48     
-144   -16    
48     112    
32     32     
-224   112    
-160   -192   
-432   -96    
-32    -96    
-48    32     
192    96     
-112   80     
-16    128    
16     112    
16     -16    
-96    -96    
-144   -128   
-32    -16    
-112   -128   
-208   -528   
48     80     
192    128    
-144   64     
288    112    
-144   272    
80     144    
-112   160    
208    224    
-288   32     
80     -64    
80     0      
-64    80     
64     64     
80     32     
176    256    
-256   128    
160    96     
192    160    
-32    -48    
224    64     
-48    32     
80     0      
16     48     
-48    -32    
144    48     
-64    128    
48     144    
32     -16    
-112   0      
176    128    
-160   80     
0      16     
0      48     
32     64     
-96    48     
-32    -16    
-16    32     
32     96     
-16    80     
176    240    
64     96     
-224   64     
48     32     
64     80     
-240   -224   
160    32     
-16    96     
-144   -32    
-80    80     
192    48     
32     96     
32     80     
-64    16     
-144   -64    
176    64     
-48    16     
144    96     
-32    64     
64     -32    
-16    0      
16     64     
16     48     
-80    32     
16     -144   
48     -16    
-32    32     
-32    0      
80     80     
-64    16     
-96    96     
80     48     
176    176    
-208   240    
-80    128    
176    160    
-192   112    
32     32     
-48    -32    
80     144    
144    176    
-80    64     
16     80     
16     80     
0      128    
48     208    
16     160    
448    1008   
-400   -80    
-288   -1056  
592    544    
-128   720    
80     -288   
0      -16    
112    272    
0      64     
64     48     
0      96     
32     16     
48     64     
48     80     
-64    32     
80     96     
32     80     
-128   -816   
-32    -288   
272    -832   
-160   80     
128    -288   
-96    -16    
-32    176    
96     80     
16     96     
64     160    
0      -240   
176    112    
48     288    
80     32     
160    80     
-112   192    
208    -432   
-48    -192   
128    208    
64     48     
-112   16     
0      64     
0      64     
64     128    
-64    448    
-128   -176   
128    -336   
-32    256    
80     96     
64     112    
32     80     
-80    128    
224    -32    
-304   -128   
208    -1664  
-112   -16    
-80    -112   
64     -224   
-64    -64    
144    32     
-48    64     
240    64     
-112   96     
128    -80    
-112   80     
240    32     
-224   176    
176    -16    
-32    64     
16     -432   
64     96     
112    -48    
48     80     
-240   -480   
32     -64    
32     16     
-64    192    
160    144    
-48    -112   
96     112    
176    160    
-64    384    
80     -208   
336    112    
-368   -816   
-80    -160   
48     32     
-96    -96    
96     0      
192    64     
48     128    
304    112    
-80    288    
352    -16    
-32    144    
176    -80    
48     -48    
400    -384   
-144   32     
-32    -112   
64     -32    
112    80     
-32    176    
80     -16    
224    464    
96     592    
32     176    
0      -16    
16     -32    
16     32     
256    80     
-80    64     
32     -288   
192    352    
112    -48    
16     272    
-64    -1264  
-64    -16    
128    48     
64     320    
-64    160    
-160   -96    
128    -2784  
96     -528   
336    -304   
64     384    
80     16     
128    64     
0      -16    
96     -64    
64     224    
-96    -128   
80     -1440  
-64    144    
64     -64    
0      464    
-240   176    
176    -784   
-32    -32    
-16    -64    
176    80     
32     -208   
80     160    
272    -304   
-144   -752   
48     -1408  
32     -224   
48     16     
-176   -80    
224    -112   
96     -160   
-1024  -112   
-112   -160   
208    -112   
-128   -720   
16     -320   
144    -1232  
-48    -48    
16     96     
-96    -272   
304    -240   
80     -32    
144    -112   
48     -32    
-208   -64    
64     64     
0      368    
192    144    
-96    -32    
128    -48    
64     -16    
160    -256   
-160   -128   
-112   -608   
32     -256   
240    -32    
-16    176    
32     -96    
-96    0      
0      16     
-16    64     
-224   304    
288    0      
-448   -80    
16     -96    
112    -80    
96     -256   
48     0      
80     -32    
-48    80     
112    -256   
-96    96     
96     80     
160    80     
-96    16     
48     -96    
-128   -16    
80     -32    
-560   -80    
-32    -64    
192    64     
-64    -64    
192    0      
-16    -464   
48     32     
-96    -320   
160    80     
80     176    
-64    -160   
-96    -32    
32     -96    
-96    -144   
208    -320   
-352   176    
112    -128   
-224   -240   
48     -192   
-80    -176   
-48    -656   
80     16     
80     -832   
112    48     
-80    -192   
240    0      
-176   16     
32     -48    
80     64     
-80    64     
-272   -288   
0      -176   
96     -80    
-128   -144   
96     128    
80     -144   
0      128    
224    -80    
16     80     
-112   -48    
128    -64    
176    16     
16     48     
-416   -128   
192    -176   
-16    -16    
-32    -80    
-144   16     
32     -16    
0      112    
80     -160   
32     96     
-48    -432   
64     -80    
-176   -176   
-32    48     
32     48     
-80    32     
-272   144    
48     64     
-656   -96    
0      16     
-656   -112   
160    -64    
-80    32     
48     -80    
-160   368    
32     64     
-272   -64    
32     -80    
32     -48    
-80    -144   
144    -48    
-144   128    
256    160    
-176   64     
0      64     
-16    -96    
-1776  -304   
32     96     
-800   -32    
-96    128    
-32    -32    
-128   48     
-16    128    
-96    16     
64     32     
144    32     
-32    16     
144    96     
-112   64     
80     -176   
-112   112    
-64    -112   
-64    32     
-80    -16    
-16    32     
-48    112    
-256   16     
-96    0      
-400   -80    
-128   48     
208    96     
-320   32     
-1056  -112   
-272   -208   
48     -208   
-80    16     
64     -96    
-64    112    
-48    -160   
-48    64     
-16    -32    
-48    80     
64     176    
-224   -32    
32     48     
80     0      
-192   -16    
-720   48     
-176   -80    
-192   -192   
304    0      
-16    128    
96     96     
96     -64    
-192   144    
-80    -160   
-128   112    
48     -48    
-144   -64    
16     80     
-16    96     
-64    16     
-208   -16    
368    80     
-1136  96     
-48    144    
-32    -240   
64     96     
-160   -32    
16     -16    
16     96     
-176   48     
-144   0      
112    96     
-336   -96    
0      -144   
-32    16     
288    96     
-96    160    
-448   -96    
192    208    
-224   -96    
-144   -48    
112    -64    
64     -16    
0      32     
208    80     
-256   0      
64     0      
-32    96     
352    160    
-400   176    
-208   -112   
64     160    
-256   16     
96     176    
-368   -48    
-16    16     
0      -16    
-64    -64    
96     -192   
112    -256   
80     48     
-128   192    
80     112    
16     -16    
48     32     
-96    -32    
-16    112    
-96    -256   
-96    -48    
-192   176    
-112   -176   
160    -16    
-160   -160   
-96    -144   
-176   -512   
384    64     
0      224    
-32    -64    
-160   16     
192    -48    
-336   176    
240    336    
-432   -224   
320    240    
-160   0      
64     112    
-32    0      
16     160    
-16    64     
16     272    
240    0      
-224   160    
-240   -16    
-80    -560   
128    64     
-144   272    
336    128    
-368   -64    
-128   112    
224    64     
-176   0      
48     80     
0      96     
32     96     
-80    -16    
32     64     
-112   -16    
16     96     
-208   96     
224    -80    
-176   -16    
96     176    
-128   -64    
-128   112    
128    -16    
-96    64     
80     16     
-80    48     
64     -16    
128    112    
32     80     
64     -32    
80     192    
16     48     
144    144    
-64    -112   
64     64     
16     -16    
-16    0      
128    48     
-48    80     
32     144    
-16    -16    
-64    -64    
16     208    
80     48     
-16    0      
-32    48     
32     -112   
96     160    
0      160    
224    720    
304    832    
0      416    
-32    480    
48     288    
-64    -160   
48     32     
-48    48     
64     -32    
64     48     
320    304    
-80    592    
-96    224    
240    32     
-80    32     
208    240    
-128   80     
0      48     
32     64     
-240   -320   
0      -656   
0      -288   
192    592    
48     176    
-64    80     
96     32     
-96    48     
-112   -112   
112    80     
-32    80     
-432   -1344  
400    192    
128    672    
-48    16     
144    -160   
-32    -96    
192    80     
240    624    
-112   432    
-224   -432   
-192   32     
512    576    
-608   160    
128    112    
-256   -128   
48     -80    
48     304    
0      -128   
80     592    
-32    -176   
32     160    
176    48     
-320   -864   
-80    -144   
304    624    
-304   -144   
0      -192   
192    320    
-96    128    
-176   -608   
-128   -624   
80     0      
-48    -1968  
-96    64     
160    80     
80     112    
64     272    
192    112    
0      -16    
48     144    
48     -240   
-176   -240   
128    -176   
48     16     
96     32     
-16    -32    
128    -64    
128    -912   
128    192    
208    128    
-32    144    
32     128    
16     -128   
-112   -224   
208    144    
-288   -176   
336    -16    
0      128    
80     -96    
-48    64     
112    144    
-208   112    
112    -352   
-80    -32    
144    -576   
-112   96     
32     -160   
-32    32     
0      -112   
32     80     
-128   96     
288    320    
-144   80     
336    -112   
-224   160    
240    -128   
0      64     
112    -336   
128    112    
144    112    
80     144    
-64    -1264  
48     80     
160    64     
96     112    
0      128    
64     96     
320    176    
80     -160   
32     64     
112    96     
80     -80    
16     -320   
48     112    
64     -432   
-64    80     
0      224    
-112   -240   
320    -288   
80     144    
144    192    
-16    160    
64     48     
160    -48    
0      160    
192    -304   
32     48     
16     -288   
224    224    
0      -64    
48     144    
128    96     
64     80     
-80    32     
64     112    
32     -176   
-16    -96    
80     144    
208    -80    
-224   -48    
160    -208   
224    176    
-400   -160   
192    48     
-64    -96    
96     192    
32     -384   
0      208    
112    112    
256    -1472  
-496   -448   
384    0      
-240   -496   
240    -32    
-48    -624   
0      -224   
96     -48    
0      -80    
96     192    
32     -160   
-80    -1520  
96     64     
-16    -368   
176    48     
-32    -64    
64     -176   
208    0      
-272   -208   
144    -64    
64     -832   
-240   -432   
64     -992   
48     -64    
-176   128    
0      -144   
16     -160   
64     96     
0      192    
80     80     
112    -176   
80     -64    
-224   -208   
-48    -272   
96     -16    
-128   -144   
48     -128   
80     -400   
80     -144   
-352   -352   
464    -80    
432    336    
-480   64     
48     -96    
96     96     
-384   -96    
96     0      
-192   -32    
-16    -16    
64     -176   
272    -48    
-48    -176   
-160   -64    
256    -224   
-128   -368   
256    208    
-96    48     
-112   48     
112    -32    
16     -192   
192    -16    
-176   192    
-288   -96    
160    -192   
-368   -32    
16     -192   
-64    -144   
112    -64    
-32    160    
-32    -128   
176    48     
-176   -128   
112    144    
176    80     
-48    -112   
32     -32    
96     -80    
-240   -64    
32     -224   
-256   -112   
176    -32    
-320   32     
80     -240   
-144   -48    
176    -928   
-64    48     
160    -1472  
-80    -32    
-16    -16    
128    112    
-48    48     
-64    16     
-32    -32    
48     -32    
-160   96     
-48    80     
-160   -48    
80     80     
112    0      
160    -128   
32     48     
128    -672   
0      48     
-272   96     
480    -16    
-48    48     
128    -16    
-528   -128   
64     -160   
80     -320   
256    32     
-272   -16    
-112   -256   
304    96     
-96    432    
240    400    
-48    -896   
112    -352   
-192   -176   
176    -112   
32     96     
-176   64     
-16    -96    
128    -192   
-48    -32    
-112   -240   
-320   -176   
160    -224   
208    80     
32     -96    
64     160    
432    288    
-336   528    
-256   336    
144    160    
-48    128    
0      0      
-224   128    
256    464    
-192   256    
80     160    
-240   -64    
416    96     
-304   -208   
-128   -1024  
-32    -128   
16     -128   
-864   -176   
144    160    
-928   16     
112    64     
-32    -112   
-112   -32    
96     -96    
-48    -16    
112    48     
-48    176    
-384   -368   
128    -96    
448    704    
-320   432    
-240   -352   
32     32     
-368   16     
-560   -48    
-192   -112   
-352   96     
16     -80    
96     240    
-192   -592   
-400   -256   
32     464    
-240   -256   
-32    -240   
16     -64    
-48    304    
48     80     
-80    -32    
272    432    
-304   368    
16     -144   
-112   128    
-48    96     
-496   -16    
-144   -64    
-272   -224   
-224   -224   
48     -192   
48     96     
-176   -144   
-32    -64    
-320   -464   
32     -432   
-48    32     
96     0      
-128   48     
96     64     
-192   64     
-368   0      
-96    -32    
48     0      
176    112    
-112   -64    
64     32     
-32    16     
-64    0      
-16    48     
-176   208    
192    560    
-96    272    
0      144    
-400   -224   
48     -32    
-208   176    
160    64     
-1152  -32    
-96    -32    
80     -496   
-96    -192   
320    -16    
-624   32     
448    16     
-176   80     
16     64     
-48    64     
-160   16     
0      32     
-32    128    
32     16     
240    224    
-416   160    
0      32     
64     -464   
0      16     
192    0      
-96    160    
112    160    
-176   48     
256    384    
-224   256    
-208   -336   
32     -1056  
128    -368   
160    256    
144    544    
-416   -32    
80     112    
64     80     
48     208    
-64    64     
-64    -224   
64     416    
-160   32     
16     -80    
64     336    
-48    64     
32     32     
-48    64     
-144   -112   
192    128    
-240   -528   
144    144    
48     928    
48     -272   
-80    80     
-48    400    
16     -128   
-32    -16    
96     416    
48     432    
224    -560   
-288   -96    
80     -16    
-160   64     
192    48     
-160   112    
160    192    
80     208    
-96    -64    
144    128    
144    656    
-80    -80    
32     96     
0      64     
-32    32     
-80    -32    
112    -16    
80     192    
16     -160   
-80    -128   
48     -32    
-256   48     
416    48     
-16    32     
-80    112    
-64    80     
80     128    
224    144    
-192   16     
224    224    
-656   -192   
48     -432   
32     -176   
-16    -48    
0      128    
-304   -144   
144    32     
32     112    
208    224    
32     80     
-240   96     
528    -112   
-96    192    
304    96     
-256   -48    
192    160    
-96    64     
32     144    
-352   0      
544    96     
-112   128    
224    -96    
-48    112    
144    80     
-128   16     
16     -48    
80     128    
112    144    
-448   -16    
192    80     
-144   112    
192    -144   
-80    224    
144    32     
-80    96     
128    64     
-32    96     
16     304    
-64    32     
0      48     
96     96     
208    224    
-352   144    
-80    64     
112    96     
32     64     
-112   -48    
-160   16     
-64    32     
-160   -752   
160    96     
32     16     
16     96     
-48    80     
-64    32     
16     32     
112    96     
0      48     
-16    16     
16     -80    
176    48     
96     48     
128    128    
96     112    
-144   -48    
80     16     
96     0      
-16    128    
128    16     
-32    64     
-64    64     
48     96     
-32    0      
-96    96     
0      48     
16     96     
16     128    
64     112    
16     64     
-16    -384   
96     64     
16     64     
-32    96     
160    176    
-208   64     
-48    16     
48     32     
-64    16     
144    144    
-96    144    
208    -80    
-208   -64    
128    80     
-48    32     
16     -256   
112    80     
-64    -2192  
16     48     
48     80     
224    256    
-208   64     
-112   64     
400    -64    
-192   144    
-48    -64    
160    288    
-272   240    
96     192    
240    176    
-144   -32    
64     -16    
96     -1056  
48     48     
0      16     
-80    -96    
96     -128   
80     -32    
-64    16     
128    96     
-176   -112   
192    -64    
-32    32     
96     -96    
0      128    
80     -272   
-48    112    
0      -576   
-32    -128   
208    -928   
96     80     
-48    16     
48     0      
0      -32    
64     96     
-80    64     
-16    112    
144    160    
-48    -32    
0      112    
-32    -128   
-288   112    
336    -304   
-128   48     
128    -432   
-96    32     
-80    -832   
208    32     
-48    112    
144    80     
32     112    
32     32     
-112   80     
0      0      
112    96     
-96    48     
144    -16    
192    -384   
-96    112    
240    -16    
-144   16     
-32    192    
-16    144    
-48    -16    
160    96     
80     48     
-256   -400   
128    32     
-48    -480   
48     80     
32     -80    
112    80     
-32    -208   
16     32     
144    16     
16     112    
-48    -272   
80     160    
0      32     
-32    112    
-80    16     
64     -128   
16     80     
-32    -192   
272    464    
-208   -544   
128    0      
0      208    
-64    176    
-64    -48    
-112   80     
-16    -192   
160    -384   
-96    -16    
80     -96    
48     -336   
112    32     
128    -496   
-48    80     
128    -1920  
32     -32    
-320   -352   
240    -848   
-48    128    
240    48     
48     -640   
176    112    
-16    -336   
208    176    
-48    -144   
-112   -880   
-224   -608   
208    -272   
32     -848   
112    -960   
48     -176   
112    -688   
80     -96    
256    224    
128    384    
16     -144   
64     480    
224    -192   
48     48     
-64    64     
-80    -144   
-48    -160   
-16    -192   
304    32     
-272   -336   
160    -240   
48     128    
192    544    
48     -720   
-32    64     
128    64     
304    496    
-208   -368   
-32    -352   
208    352    
-128   176    
80     -384   
-16    112    
64     16     
0      -160   
-48    -144   
-80    -656   
128    -32    
-48    -144   
-224   -96    
560    -288   
-176   352    
-96    80     
112    -432   
0      -32    
160    272    
-176   -48    
352    -176   
-1200  -32    
304    -176   
176    0      
-240   -224   
-80    32     
128    -752   
-96    32     
32     -128   
16     -16    
-144   -64    
-64    32     
-160   48     
320    608    
-176   112    
-64    -80    
-832   -448   
-80    -176   
320    48     
-128   0      
544    464    
-192   400    
-80    144    
16     -1328  
-256   96     
224    -544   
96     96     
-48    -16    
-112   -336   
-32    -144   
-48    -128   
-256   -192   
128    -192   
-240   -144   
112    -160   
128    256    
-64    -176   
-80    -144   
256    -1216  
-16    64     
-16    -80    
80     -32    
-128   -80    
96     -16    
-208   -32    
80     32     
-352   -80    
48     -32    
-448   -80    
-64    -304   
304    128    
-160   -208   
192    -64    
112    -176   
96     624    
-336   -64    
-16    -560   
-128   -64    
16     64     
208    -64    
208    640    
48     720    
-112   112    
-16    0      
32     -368   
80     176    
112    16     
-144   32     
-128   48     
-64    176    
32     224    
-176   -64    
-160   64     
-16    -96    
-16    -304   
368    688    
-624   -672   
368    -32    
-192   80     
-16    -64    
192    368    
-864   -272   
208    1216   
-48    -240   
-1040  -1232  
240    304    
-752   288    
-64    -304   
-144   0      
16     32     
-96    -128   
96     256    
80     -160   
272    0      
-496   -464   
-112   256    
-544   -304   
-32    -32    
48     144    
-32    192    
144    -16    
-144   -240   
0      -144   
-656   64     
16     240    
224    176    
-240   -384   
-256   -176   
32     96     
-160   -176   
-160   144    
48     -160   
-32    48     
-176   48     
-400   16     
-48    80     
-352   32     
-64    80     
-160   -64    
128    16     
-1104  -64    
-32    0      
0      -160   
384    432    
-592   -32    
304    48     
-128   208    
48     96     
-144   176    
-48    144    
-176   -80    
-80    -48    
-64    -128   
64     -128   
-144   208    
-800   -32    
224    -32    
96     96     
192    176    
-240   -48    
144    112    
80     0      
144    80     
-112   -16    
288    16     
-272   0      
64     32     
-112   -48    
16     -32    
16     -64    
-432   -32    
160    352    
-464   -16    
-48    176    
-96    -160   
-192   48     
-144   -96    
-80    32     
0      32     
-80    0      
-16    240    
224    256    
-272   176    
-80    80     
80     0      
64     -16    
112    112    
-256   112    
240    128    
-320   -112   
16     144    
-144   208    
-192   144    
-144   -64    
-96    -272   
-512   -544   
176    -304   
-240   -256   
-64    48     
80     128    
-256   -32    
128    32     
-704   96     
32     80     
-48    32     
144    80     
48     16     
16     -32    
-32    -64    
144    64     
-48    32     
-160   224    
192    160    
0      128    
96     272    
-288   0      
-80    -48    
-128   0      
-16    80     
192    128    
-128   -16    
96     112    
160    80     
144    384    
-336   80     
16     32     
-48    80     
208    96     
-352   -144   
144    96     
-16    -96    
-96    32     
-112   32     
0      224    
80     96     
-112   32     
-48    112    
16     32     
-128   144    
80     80     
-112   -256   
128    112    
-144   80     
-288   -240   
64     208    
64     -16    
0      48     
-256   16     
112    48     
-48    0      
-16    192    
192    64     
-208   48     
96     128    
80     -80    
-16    -16    
64     144    
80     80     
-64    32     
32     128    
128    128    
144    176    
144    224    
-240   -16    
96     -64    
32     80     
128    128    
-96    16     
-80    48     
-48    16     
-16    208    
272    80     
-192   -48    
112    64     
272    160    
-208   -128   
144    128    
64     16     
-64    64     
144    112    
0      272    
-32    112    
-48    0      
0      -32    
176    64     
16     144    
-80    16     
48     32     
-144   -48    
48     96     
-128   0      
64     112    
16     64     
16     96     
16     128    
-80    96     
-48    64     
-16    48     
0      32     
160    128    
-48    0      
-96    -80    
80     -16    
32     -16    
128    192    
-16    64     
-48    -272   
16     64     
-128   0      
128    80     
-112   16     
256    -16    
-192   48     
96     128    
-112   32     
-16    256    
-80    -288   
176    240    
-160   16     
304    160    
16     -128   
272    -1328  
-48    -48    
208    0      
-128   144    
48     96     
-16    80     
-48    32     
176    288    
-144   48     
112    -192   
64     0      
256    480    
144    160    
-176   -160   
176    0      
-112   -432   
32     64     
64     160    
-48    -80    
16     16     
80     64     
128    112    
-112   48     
352    512    
-336   64     
-32    -304   
208    64     
-208   0      
240    -256   
112    192    
256    48     
-96    192    
32     -528   
48     -176   
-48    48     
48     192    
-32    48     
64     16     
-32    112    
96     256    
-176   -112   
48     -176   
0      -48    
112    -32    
160    192    
32     96     
176    176    
16     -800   
-240   -384   
192    464    
-112   240    
224    320    
16     272    
-160   -304   
176    160    
-272   -176   
288    64     
-96    256    
128    -176   
32     -224   
16     -320   
240    144    
352    16     
-320   64     
-16    -512   
240    256    
112    -176   
-496   -352   
192    -928   
-160   -240   
384    -256   
96     576    
-128   496    
16     -816   
112    304    
0      192    
0      -352   
-16    96     
-16    272    
-48    -208   
-48    368    
-400   208    
272    -832   
240    224    
-288   608    
32     -80    
-32    -16    
-192   64     
368    -736   
-480   -448   
80     -256   
16     160    
-224   -240   
208    -192   
16     -144   
208    576    
-32    432    
32     176    
176    32     
-192   16     
144    112    
208    -160   
-400   32     
176    -48    
32     160    
-32    -112   
64     32     
-80    -352   
64     48     
64     -80    
208    384    
48     480    
-80    -448   
112    -352   
96     -1568  
32     -1184  
-16    -224   
144    208    
256    352    
-368   -336   
208    144    
64     512    
-208   112    
416    -480   
-144   192    
144    160    
0      -208   
128    48     
-16    -368   
-736   -544   
256    80     
96     784    
144    816    
48     144    
96     -2528  
-256   -736   
464    -176   
-368   48     
416    128    
-240   0      
256    -496   
-144   32     
128    -208   
-144   -32    
-80    32     
80     64     
48     -160   
-128   -288   
400    -288   
-288   -144   
192    -176   
-16    304    
80     64     
16     -480   
0      32     
96     -144   
-96    96     
32     80     
96     352    
-32    -80    
-48    -288   
-480   -224   
80     -448   
208    320    
144    -64    
144    64     
48     -1184  
144    -272   
304    224    
-128   -96    
-32    -192   
112    192    
0      -64    
-48    -336   
-336   -464   
176    -144   
-144   -16    
64     0      
48     112    
144    176    
352    448    
-240   -208   
-240   32     
-64    -528   
128    32     
-64    -16    
224    96     
-160   256    
160    208    
-48    80     
-64    -128   
416    576    
-384   240    
48     64     
16     -48    
16     -112   
48     -144   
0      64     
240    -416   
-32    -64    
-32    -192   
192    16     
-32    0      
112    16     
80     64     
160    64     
-112   144    
32     -32    
-400   64     
80     -112   
-16    64     
160    -64    
64     96     
-128   -128   
32     32     
16     -304   
160    -96    
-144   16     
176    160    
-160   112    
32     -96    
48     16     
-176   -144   
176    -32    
-80    48     
-352   48     
-48    -352   
-64    32     
144    -304   
-16    80     
112    -1424  
192    208    
-32    144    
128    64     
-144   0      
96     -80    
-64    -80    
48     48     
-96    -64    
-128   -256   
96     -128   
-144   -208   
528    688    
-416   416    
-176   304    
0      304    
-176   192    
-384   -160   
-80    -288   
16     -144   
96     144    
32     208    
192    -64    
-240   -144   
-160   -224   
32     256    
80     -176   
192    96     
-32    80     
240    144    
80     -240   
-848   -16    
64     -64    
96     112    
-224   -80    
224    80     
-192   -128   
32     -96    
-176   -64    
-112   -144   
224    16     
-384   -112   
-144   -144   
-480   -368   
-80    -240   
112    32     
-288   64     
16     192    
-288   224    
-64    80     
-320   0      
48     -16    
112    128    
-96    80     
-208   32     
192    144    
-656   -208   
112    96     
-496   -160   
-32    16     
-32    -16    
16     80     
-160   192    
-96    -16    
-144   32     
-480   16     
-80    0      
96     -16    
64     32     
48     -32    
16     48     
-128   -432   
32     48     
-32    96     
-176   32     
16     64     
-176   -224   
-16    -112   
-288   -304   
-64    -48    
-192   -16    
-80    128    
-352   32     
-192   -48    
-32    -96    
-32    64     
-112   -176   
160    112    
-32    -176   
-144   -176   
144    112    
-48    -192   
16     -208   
-48    224    
288    80     
0      -32    
-160   16     
-496   -128   
80     -64    
-32    -48    
112    128    
0      -80    
-80    -16    
-80    -16    
-32    32     
0      80     
-144   -16    
96     96     
-16    -96    
96     -96    
-176   -144   
-32    -160   
-304   -80    
176    64     
-256   -16    
144    112    
-160   -160   
48     208    
64     -32    
-32    -48    
192    112    
-112   64     
-48    -80    
32     -16    
0      16     
-208   -16    
-16    112    
-32    32     
-80    80     
-336   -176   
192    96     
48     64     
-48    48     
208    176    
-48    192    
112    720    
-32    336    
-112   160    
64     112    
-48    80     
-128   -96    
240    432    
-96    176    
0      256    
-16    64     
80     112    
-64    48     
-16    64     
32     208    
-144   -48    
-256   -192   
48     -208   
-96    -16    
112    464    
-48    448    
16     48     
0      48     
-144   -112   
112    96     
-480   224    
96     128    
16     -80    
-32    -48    
-112   0      
64     544    
-128   -176   
-336   -384   
192    -128   
-80    160    
160    48     
-416   160    
272    -32    
-256   80     
-128   -80    
-112   -128   
64     16     
16     144    
80     32     
-64    128    
-48    144    
320    432    
-176   -288   
-96    176    
-32    -80    
144    160    
-112   160    
64     64     
-80    416    
208    240    
-144   96     
144    -256   
-400   -288   
-224   -256   
192    -80    
0      576    
32     32     
-112   -16    
-80    16     
-112   -288   
208    -128   
80     192    
64     512    
-128   0      
-208   -176   
64     -48    
-192   -112   
-80    -32    
-176   -128   
-112   -176   
-144   -48    
272    32     
-384   -144   
-288   -336   
-32    112    
64     80     
-240   128    
160    -128   
-144   -32    
-144   0      
208    -112   
-16    160    
240    336    
128    160    
192    128    
-32    208    
176    240    
-176   48     
112    -96    
-160   208    
96     144    
-48    16     
112    64     
-208   640    
144    -112   
-48    -224   
112    96     
-64    80     
112    96     
112    192    
32     336    
-304   16     
144    -400   
176    256    
-144   368    
80     -272   
80     480    
-160   80     
544    400    
-112   496    
-32    -160   
-96    -544   
608    -176   
176    608    
-64    272    
208    -288   
288    192    
0      432    
-208   -416   
320    128    
-16    416    
288    128    
-272   -560   
784    176    
-288   -1584  
112    -624   
416    272    
208    736    
-128   880    
-160   -928   
80     -224   
-128   -32    
96     304    
208    176    
-128   0      
416    144    
-224   -32    
112    -48    
-160   160    
176    -400   
-128   432    
128    -208   
48     256    
-16    32     
80     -208   
16     -96    
96     80     
-192   -160   
416    -208   
-16    128    
-144   -96    
416    160    
-176   -128   
240    -96    
-64    -176   
112    -48    
64     -1920  
112    176    
-64    -16    
336    752    
-96    -736   
-32    -400   
192    448    
64     160    
-176   -16    
48     192    
96     -48    
96     -48    
-16    -176   
48     -80    
112    128    
224    -1184  
0      32     
96     160    
96     176    
-96    96     
80     144    
400    336    
-304   48     
16     80     
-96    -96    
-64    -16    
128    -80    
64     -96    
96     -224   
16     16     
32     -1024  
0      144    
80     16     
32     128    
112    128    
96     128    
-288   -160   
304    -64    
192    160    
-32    -16    
-16    0      
176    -128   
16     144    
16     -144   
64     144    
80     -80    
-160   16     
64     -304   
128    0      
-32    96     
80     0      
-80    112    
224    240    
-144   32     
96     -432   
112    96     
32     -272   
-64    240    
256    -176   
-112   112    
128    -144   
-128   16     
160    288    
-112   -32    
256    128    
240    80     
192    320    
0      32     
-80    0      
64     -496   
48     32     
144    0      
-32    176    
48     80     
256    368    
-128   -16    
112    160    
48     -272   
192    144    
-64    32     
32     -512   
80     96     
224    -336   
-32    -464   
128    -112   
176    32     
-96    16     
112    304    
48     -240   
-16    48     
0      -128   
80     64     
16     96     
-48    16     
-80    32     
112    -256   
-272   -16    
-1088  -240   
144    -256   
-96    48     
-96    -160   
-48    -96    
-144   -448   
-192   -352   
384    512    
-192   -80    
160    -96    
16     -16    
288    -400   
144    80     
-192   -576   
112    -352   
-80    -32    
288    96     
-64    288    
-16    -176   
80     -48    
16     -640   
224    16     
80     -96    
128    32     
224    -96    
64     96     
320    144    
112    240    
0      -240   
176    -160   
336    192    
32     160    
-240   160    
-16    -272   
32     -192   
-112   -256   
16     160    
416    464    
-176   304    
208    -144   
-240   336    
-464   240    
64     160    
-240   -80    
48     0      
-192   -96    
144    48     
-560   -128   
160    80     
48     80     
144    80     
32     -32    
32     -352   
80     32     
64     -432   
208    304    
-208   224    
-16    240    
32     -80    
-64    -176   
192    -128   
-32    -80    
-48    48     
96     48     
-288   -32    
368    -80    
-880   96     
80     -256   
32     -80    
80     -704   
32     112    
-16    32     
-64    -64    
-112   -32    
128    32     
-64    16     
32     32     
-384   -48    
144    0      
-336   64     
-64    -112   
16     0      
176    -128   
96     208    
176    -144   
-192   112    
128    -80    
64     -32    
80     -16    
-16    -48    
32     32     
-32    -64    
-560   -48    
48     -48    
-64    32     
208    224    
-208   -16    
144    -176   
304    256    
16     -224   
48     32     
-352   16     
256    16     
-128   32     
-32    -112   
-64    -112   
96     -128   
48     -96    
128    16     
-48    112    
16     -80    
-288   -16    
432    208    
-480   208    
176    -80    
80     96     
32     16     
-16    -64    
-96    -48    
-16    32     
-144   32     
48     -32    
-48    64     
32     -48    
256    288    
-400   -144   
-272   -192   
-352   -688   
224    -160   
-384   -320   
-208   -16    
-16    -112   
-992   -112   
32     128    
16     64     
-112   -176   
208    32     
-112   176    
64     -160   
-304   240    
-384   224    
-144   64     
0      0      
48     16     
-144   -112   
-352   256    
-160   48     
-448   -128   
128    -560   
48     416    
-48    -64    
-1520  -64    
64     80     
-96    -192   
-128   160    
96     -208   
48     368    
48     128    
-240   -448   
-112   -944   
48     -224   
-32    608    
48     224    
-176   -256   
-400   -32    
-96    -16    
-272   -80    
-80    -64    
-32    -48    
240    208    
-80    96     
16     64     
-64    -112   
64     80     
-32    64     
32     48     
-112   64     
-48    16     
-32    -32    
64     -64    
-96    -16    
-80    -16    
-32    16     
-384   0      
672    576    
-528   336    
-16    160    
-160   -96    
0      -240   
-160   -832   
-32    -544   
0      -16    
32     -208   
112    96     
176    512    
144    336    
-208   224    
448    208    
-688   192    
-96    112    
-240   -256   
16     0      
192    -192   
0      -112   
-80    -48    
-288   64     
240    -64    
-224   48     
432    288    
-32    432    
0      752    
96     208    
-112   112    
-464   -64    
48     -32    
-160   -192   
320    -112   
-160   32     
208    336    
160    304    
64     288    
336    224    
-80    160    
368    304    
-144   32     
-272   -400   
-176   -304   
-128   -16    
128    -80    
16     240    
-784   512    
0      384    
80     96     
-192   96     
16     -160   
-160   96     
-32    64     
-352   -112   
272    64     
-560   -432   
576    -160   
-352   256    
304    144    
-48    160    
128    -240   
-160   448    
-192   -384   
-208   -256   
0      48     
224    -176   
48     304    
16     32     
176    0      
0      -96    
0      -32    
32     -208   
0      496    
-48    -288   
112    -592   
112    688    
-144   -64    
-128   64     
208    -80    
-16    112    
-64    -128   
304    -304   
128    400    
0      -32    
-240   -96    
304    -80    
-128   -192   
-16    -80    
64     -16    
-96    -32    
96     112    
-192   48     
-48    192    
-80    64     
96     208    
-80    176    
32     144    
48     176    
16     208    
272    448    
-224   560    
16     208    
-32    64     
112    272    
-144   96     
0      400    
-112   -544   
-256   -16    
144    -96    
-80    192    
208    96     
64     176    
-32    144    
-80    128    
-48    128    
-80    240    
304    256    
-336   16     
112    96     
-80    -96    
-80    -16    
144    -16    
64     -48    
-224   -144   
-32    -672   
-16    -160   
240    -32    
-112   112    
0      0      
16     -80    
-80    -80    
64     96     
32     192    
176    128    
-128   -64    
-16    16     
-48    96     
0      48     
144    128    
-128   160    
16     96     
-32    16     
160    48     
160    304    
-176   64     
-144   16     
400    64     
-288   80     
48     -32    
64     112    
-16    64     
-96    16     
112    -64    
176    128    
-48    -128   
192    16     
64     64     
-80    96     
64     160    
96     208    
-112   -16    
48     112    
-96    -320   
176    240    
-80    48     
32     96     
0      80     
-48    112    
48     16     
48     48     
96     112    
32     96     
96     -48    
0      -32    
32     80     
-96    64     
224    128    
-160   32     
96     -32    
-80    80     
96     -1168  
-48    80     
176    160    
160    224    
-128   -16    
48     -64    
96     32     
-16    -16    
48     128    
-48    48     
64     -96    
0      -288   
-128   -272   
96     16     
144    512    
-16    -736   
208    -16    
160    96     
-144   32     
-16    -48    
96     64     
0      96     
64     208    
-32    -208   
16     112    
160    32     
48     -16    
80     144    
32     -224   
0      96     
32     -240   
48     112    
80     -1904  
-112   32     
160    64     
48     112    
-80    80     
48     96     
-80    -128   
48     -64    
-80    -320   
48     -544   
32     -32    
64     112    
272    384    
-416   -96    
128    192    
-32    -416   
-176   -64    
-16    -352   
-32    144    
64     16     
64     160    
80     32     
96     64     
-416   -352   
496    -192   
-48    288    
80     -48    
-144   -16    
-16    -304   
128    16     
128    -384   
-48    16     
32     -384   
256    272    
-32    -16    
64     144    
-16    32     
80     48     
-48    32     
208    -192   
64     16     
-16    -256   
64     -384   
-192   -176   
224    80     
-288   64     
96     128    
-96    -144   
112    80     
16     160    
80     -16    
-272   48     
384    32     
48     32     
192    176    
160    80     
-112   80     
176    32     
80     32     
160    80     
48     16     
96     16     
16     -400   
144    160    
-144   48     
256    80     
0      96     
64     96     
96     64     
-224   -384   
48     48     
176    -160   
80     112    
-64    80     
-32    64     
-80    -240   
96     48     
-16    -384   
-112   -304   
160    0      
96     -320   
-160   96     
192    -64    
80     -720   
-48    -16    
16     144    
176    16     
112    112    
-128   -224   
0      144    
128    -320   
-64    -240   
16     176    
112    -112   
80     208    
-48    -208   
144    -112   
-1200  -144   
80     -448   
96     64     
-112   -176   
64     -576   
48     -832   
-48    -688   
-48    -320   
176    240    
-48    336    
80     32     
-16    -192   
224    48     
-272   -608   
256    112    
-16    0      
0      208    
-144   -416   
224    -368   
-64    272    
64     -368   
208    -144   
-80    176    
0      -128   
368    -96    
-224   32     
144    -112   
112    32     
-112   48     
48     32     
-320   32     
32     -464   
-208   -224   
144    176    
-128   -192   
256    -224   
-64    256    
128    -176   
-32    64     
-16    -256   
0      32     
0      -240   
80     -272   
-80    -112   
80     -32    
-80    -128   
-160   -288   
48     -256   
-64    -64    
96     -160   
80     -144   
0      16     
80     -416   
-64    -80    
112    -272   
-176   80     
240    112    
-176   144    
-96    -16    
-16    160    
-304   -16    
176    -64    
-192   -32    
32     -224   
-1584  -16    
-160   -592   
96     -576   
80     -288   
-208   -16    
80     -752   
16     96     
0      -96    
64     0      
-192   -64    
80     -64    
-32    32     
96     128    
-112   -16    
-288   0      
-256   -64    
-144   -96    
48     32     
-16    -16    
288    112    
-320   16     
-144   -304   
-288   -736   
32     -416   
-272   0      
160    -192   
-384   -64    
-96    -224   
-192   -272   
192    -240   
928    752    
-512   816    
-112   -208   
48     -416   
16     16     
-208   -960   
-80    -16    
-224   -288   
-176   -336   
-192   -208   
-160   -496   
-16    560    
416    656    
-400   224    
-32    -448   
80     -144   
-80    96     
-224   -128   
256    -432   
-64    768    
352    320    
-96    -480   
-256   -960   
-16    384    
-320   176    
-16    -80    
-96    48     
-64    80     
-48    -32    
224    32     
384    128    
-304   288    
-112   -352   
-752   -304   
112    144    
112    64     
-560   -544   
-16    240    
-848   272    
224    -368   
-1024  -400   
-176   -64    
112    224    
-80    1072   
32     -112   
-224   -160   
-336   80     
-144   -32    
-32    48     
432    352    
-208   336    
-304   -288   
32     -496   
-192   -144   
48     64     
16     240    
-256   320    
-1952  112    
-208   -80    
-96    -112   
80     112    
-208   96     
256    80     
-208   -112   
-16    64     
-80    48     
16     128    
-32    160    
112    208    
-32    16     
16     -16    
64     -80    
-416   0      
224    -64    
-176   -208   
176    16     
-96    0      
336    224    
-272   16     
-240   64     
32     0      
-96    -80    
288    80     
16     192    
-48    48     
-352   0      
96     128    
-288   -48    
48     48     
-816   176    
-128   144    
208    240    
144    112    
-80    -144   
112    16     
128    -32    
96     -64    
-224   -80    
-128   48     
-224   96     
-64    48     
-16    48     
-160   32     
16     112    
-528   -112   
-80    -80    
-32    -144   
80     192    
-80    112    
96     112    
32     0      
32     32     
64     144    
176    64     
-208   32     
32     80     
16     16     
-32    64     
0      32     
-528   -208   
80     208    
-48    64     
80     -144   
-64    32     
224    112    
-112   -48    
-16    -32    
0      32     
-48    112    
-16    128    
-48    -32    
16     112    
-128   32     
112    48     
-80    32     
48     96     
-592   -80    
-208   32     
48     -16    
-128   96     
-48    96     
-192   -32    
208    112    
-80    32     
-16    48     
-144   -16    
-48    48     
-80    112    
-112   48     
-240   0      
64     144    
-48    -16    
-240   -16    
-16    16     
48     96     
-64    48     
-32    16     
-32    -112   
-48    80     
-32    16     
-160   16     
128    32     
-48    -64    
96     -32    
-160   -32    
16     64     
48     112    
-16    32     
0      48     
-80    16     
128    16     
-400   -352   
416    16     
-336   80     
-96    32     
-240   48     
288    128    
-320   16     
-48    32     
-176   -80    
320    240    
-64    -16    
-160   48     
256    80     
-176   32     
0      128    
-16    144    
32     176    
-128   0      
160    -64    
-144   0      
112    0      
-80    -48    
-16    16     
-16    0      
112    128    
-32    112    
-80    64     
-80    -16    
176    64     
-224   -80    
208    32     
-16    16     
-96    -16    
64     64     
-208   80     
32     128    
-112   32     
32     -16    
0      64     
80     80     
-208   32     
224    160    
-48    16     
208    80     
32     144    
64     48     
-160   -144   
80     -112   
64     112    
-192   -208   
384    64     
-144   208    
96     32     
64     80     
128    176    
-64    16     
64     96     
0      80     
96     96     
-16    0      
432    528    
-176   608    
-192   112    
48     -128   
160    0      
0      80     
-128   -80    
48     32     
32     112    
-32    96     
32     48     
64     80     
16     112    
-16    32     
80     48     
16     96     
-96    -16    
224    176    
-144   96     
-160   -288   
320    192    
-256   96     
-48    -240   
144    112    
64     128    
-176   80     
176    0      
-128   -32    
336    -48    
-224   -32    
240    -32    
0      32     
48     32     
-192   -560   
-112   -176   
352    160    
-112   -16    
208    128    
-240   256    
-64    -2032  
96     112    
32     32     
144    80     
-32    128    
-64    112    
-32    64     
64     288    
80     -208   
-112   48     
192    -48    
32     48     
-64    32     
128    -16    
96     128    
32     -224   
-96    -112   
224    -128   
176    288    
112    -144   
112    240    
80     288    
272    416    
-224   192    
224    272    
-304   -352   
-128   -384   
176    496    
16     -32    
192    208    
32     64     
144    272    
0      -768   
-16    -160   
48     368    
112    -32    
-32    -128   
288    208    
-256   64     
352    208    
-304   -256   
304    144    
-112   -16    
128    -144   
48     192    
64     -80    
-32    -128   
-16    96     
32     -48    
-96    -576   
32     144    
-96    0      
176    -160   
-80    -32    
256    -64    
-80    64     
160    -112   
0      80     
80     -16    
64     64     
80     -368   
48     80     
64     -160   
32     48     
80     64     
32     96     
-16    0      
64     -80    
64     160    
32     112    
224    224    
-112   -160   
80     160    
32     -288   
48     48     
16     -336   
112    192    
-32    144    
144    -80    
208    32     
64     128    
176    96     
352    352    
-224   160    
256    112    
0      128    
128    -64    
80     208    
16     -400   
64     -16    
-224   -144   
-64    -160   
64     -96    
16     160    
208    -848   
-80    192    
176    48     
128    208    
-64    -32    
128    -96    
-80    224    
432    704    
-160   80     
224    64     
-160   128    
80     -80    
-16    112    
-16    -176   
64     144    
-144   32     
176    -288   
64     96     
80     -208   
0      -112   
208    -48    
-128   -480   
80     -32    
32     -64    
224    128    
32     80     
192    224    
80     336    
64     192    
64     -848   
32     0      
-16    -368   
-224   336    
96     0      
96     -320   
32     448    
-976   -944   
144    -1200  
368    528    
16     560    
32     -800   
128    -64    
32     208    
-144   -32    
80     -208   
0      -288   
-96    -96    
64     224    
-400   -144   
240    -48    
-464   -64    
192    496    
-192   -400   
240    -288   
272    32     
-64    -368   
288    256    
-96    -192   
64     32     
-32    -80    
64     128    
0      32     
64     112    
-16    16     
-48    16     
-64    -192   
320    -112   
-896   48     
176    16     
80     48     
48     -144   
416    320    
-272   -144   
0      -176   
-48    -224   
32     -176   
-144   16     
208    32     
64     768    
80     32     
-560   -304   
320    -160   
-624   -48    
-48    -272   
-176   -192   
384    -256   
-464   -448   
816    -560   
-160   160    
176    -1056  
-80    64     
608    240    
-432   256    
-16    -112   
-176   -48    
-32    -64    
-256   32     
-16    32     
32     96     
-496   32     
-96    -64    
64     -48    
-16    -304   
160    128    
-16    -32    
32     224    
96     128    
32     96     
-272   16     
112    -16    
80     16     
112    16     
-480   32     
192    -192   
16     -32    
-32    -160   
-32    -80    
256    -16    
64     112    
128    -432   
-16    112    
-32    -48    
-32    0      
-144   -48    
-48    96     
-16    128    
80     -368   
-80    -32    
48     -128   
-320   0      
160    -16    
-32    176    
64     -256   
80     -64    
224    -624   
-48    -144   
-112   0      
16     80     
0      -16    
16     32     
-256   -32    
32     -32    
-96    48     
-48    -32    
-176   96     
-160   -64    
128    32     
160    -224   
48     80     
352    -208   
128    48     
48     32     
-16    -32    
0      -144   
-32    -256   
48     96     
208    0      
-160   32     
176    0      
-112   32     
-272   -128   
-80    -48    
-320   -272   
48     112    
128    128    
-288   32     
-112   -80    
-624   64     
48     -48    
-432   64     
32     -16    
-208   80     
224    -96    
-32    -112   
96     48     
-432   -288   
224    16     
-112   16     
128    96     
-16    32     
-64    -32    
64     48     
-144   -64    
144    -32    
-144   64     
144    96     
-1376  96     
80     64     
-144   -16    
80     80     
0      -48    
48     112    
16     -48    
-208   16     
16     80     
0      16     
0      0      
48     80     
32     64     
-96    -64    
64     32     
-416   -32    
-80    64     
96     16     
-16    96     
128    32     
-128   48     
208    -48    
-144   80     
16     16     
-224   64     
112    112    
-144   16     
-144   0      
-144   -80    
16     48     
-400   -16    
96     96     
-720   -32    
144    80     
-80    -128   
256    208    
-320   32     
-16    64     
-80    -64    
288    96     
-304   160    
-32    64     
64     0      
-16    48     
32     144    
-224   176    
128    128    
-544   48     
80     16     
128    -96    
-80    16     
128    128    
16     112    
-64    0      
-48    -48    
64     32     
144    176    
48     96     
32     160    
0      -16    
-112   16     
48     144    
-448   -96    
112    96     
-128   32     
-16    80     
-32    432    
16     272    
-80    96     
-160   -144   
176    112    
-144   112    
-48    0      
16     16     
-32    32     
-224   -96    
176    176    
-208   48     
48     96     
-224   32     
656    720    
-336   928    
-240   240    
-176   432    
96     432    
-128   -304   
-48    -368   
272    0      
-224   176    
224    256    
-336   240    
160    80     
-160   -144   
224    64     
16     96     
96     240    
48     272    
-112   -64    
96     160    
-80    48     
-80    -160   
-48    -368   
-96    -192   
400    112    
16     96     
224    224    
0      192    
-48    128    
-128   320    
48     224    
-160   160    
-144   144    
96     192    
208    512    
-240   224    
16     176    
-80    48     
-224   -64    
-160   -272   
192    -640   
16     32     
192    240    
-48    16     
80     160    
64     32     
48     112    
-32    176    
-32    -160   
-80    224    
160    -48    
-208   0      
176    176    
96     208    
-96    -16    
112    144    
80     256    
-144   -320   
-48    112    
80     128    
64     80     
-80    112    
112    96     
16     80     
16     80     
16     64     
48     304    
416    48     
-176   432    
-224   288    
-96    -672   
-64    -784   
320    512    
80     736    
-16    80     
-48    64     
-16    -112   
16     176    
-16    -16    
0      -160   
-48    -208   
-80    -272   
128    320    
-48    400    
0      -32    
80     160    
-48    64     
32     96     
32     16     
-32    176    
16     320    
192    -176   
-112   -16    
96     160    
-80    96     
96     176    
16     112    
0      0      
80     144    
-96    48     
16     128    
32     64     
0      -80    
0      16     
48     96     
48     112    
48     144    
-336   -112   
400    -208   
-192   16     
128    48     
32     288    
112    384    
80     96     
-80    176    
144    0      
-96    -32    
48     -208   
64     160    
-48    64     
192    176    
-80    64     
-32    -16    
-48    144    
48     64     
-32    144    
128    224    
-192   80     
96     80     
-16    -192   
64     240    
48     352    
16     32     
-32    -384   
-16    -2784  
-16    64     
288    256    
-64    192    
224    144    
64     576    
816    1120   
-160   1520   
144    944    
-48    256    
-48    -528   
160    -320   
32     48     
160    16     
-16    320    
112    -352   
32     128    
-176   80     
272    224    
-80    880    
-16    -416   
192    -368   
32     224    
-32    64     
96     112    
-48    1072   
-48    -336   
-32    -400   
-32    -64    
-16    208    
32     -224   
-16    -144   
64     -576   
80     96     
96     16     
-16    32     
-272   -512   
128    352    
192    560    
-208   -48    
112    -256   
48     -32    
-128   0      
272    64     
80     240    
112    -96    
64     0      
16     -352   
368    352    
-320   -656   
128    160    
16     144    
-96    288    
144    320    
80     208    
192    176    
48     48     
288    368    
-272   320    
96     16     
48     -80    
144    96     
-16    128    
176    288    
-112   -96    
48     -96    
-16    128    
-288   -96    
-48    -288   
112    80     
144    192    
-16    16     
-160   16     
208    -192   
-80    144    
-16    -432   
-48    -16    
16     -32    
64     176    
-144   -144   
240    208    
-32    -32    
16     128    
-64    -144   
176    32     
32     112    
48     -64    
176    288    
-224   -192   
-32    80     
224    -80    
-80    64     
48     64     
128    112    
656    416    
-880   -384   
400    64     
-304   -160   
224    -1232  
-192   -80    
208    -688   
-112   -224   
-32    -1472  
80     -32    
-16    112    
48     32     
-128   80     
96     -176   
-16    -944   
224    144    
-96    -144   
16     128    
-240   -112   
272    -112   
32     0      
-64    -384   
-96    -112   
-16    -336   
-64    -96    
-64    -368   
176    -192   
32     112    
-32    -288   
128    -448   
-96    -32    
-80    -80    
48     48     
48     -272   
80     -64    
-592   16     
64     0      
16     32     
64     -80    
32     144    
144    64     
-32    -272   
80     320    
176    -32    
-16    -144   
112    16     
240    -224   
32     48     
-16    0      
112    -64    
-176   32     
112    80     
-192   -32    
208    96     
80     -64    
-16    -592   
176    32     
48     96     
48     64     
80     0      
-64    80     
176    48     
-128   -112   
64     32     
64     208    
-48    -32    
-128   -192   
-560   -192   
80     -288   
160    -16    
32     48     
208    96     
80     -432   
-64    400    
320    -544   
-48    -16    
208    16     
112    96     
-224   16     
240    48     
-304   -80    
48     -160   
-992   128    
112    64     
-176   -224   
288    80     
64     -32    
-32    -496   
80     -64    
240    304    
112    112    
-16    128    
112    32     
-144   -32    
80     -96    
-48    48     
96     -32    
-96    32     
64     96     
-464   -160   
96     -224   
48     16     
176    -288   
-64    128    
144    -64    
32     160    
-48    -80    
32     16     
16     -48    
64     64     
-80    16     
80     64     
0      -48    
-128   -32    
-272   -64    
-16    -208   
160    144    
-96    -96    
144    144    
32     -112   
96     -16    
-48    -48    
64     -16    
112    32     
160    128    
-112   48     
96     48     
-144   48     
-96    -240   
96     -64    
96     -96    
48     112    
48     -128   
128    -48    
64     -192   
48     0      
-64    32     
320    128    
-224   224    
112    272    
-304   192    
-240   -64    
208    -128   
80     80     
16     352    
-16    272    
208    512    
128    -16    
-80    224    
192    -32    
-848   -16    
144    -32    
-1200  64     
176    -224   
-304   16     
16     64     
112    16     
-48    96     
-16    -96    
-272   352    
-640   -160   
-176   32     
-400   -336   
272    368    
-112   32     
-96    -96    
-160   -32    
-256   -32    
-112   0      
-1040  48     
-80    -96    
0      -128   
-144   -320   
-128   -464   
-208   -128   
-128   -256   
-64    272    
-96    -176   
16     224    
0      544    
-32    240    
-352   -240   
-256   -400   
64     48     
-256   -16    
64     0      
-576   -128   
32     32     
48     -208   
-112   -32    
-96    -336   
112    192    
-80    -208   
-96    176    
128    192    
-64    -144   
48     144    
64     192    
-192   64     
-16    -96    
160    144    
-1440  -48    
16     -256   
-256   208    
320    240    
-240   -160   
208    -48    
64     160    
320    400    
-192   -16    
-176   -48    
-16    -336   
288    160    
-96    32     
-64    288    
-64    16     
-176   -320   
-32    0      
-320   640    
144    112    
-352   -400   
-64    -80    
-80    528    
400    448    
-336   32     
112    272    
-96    -192   
-48    16     
-176   64     
-16    0      
0      144    
-144   -48    
32     128    
-208   -64    
-64    80     
-16    -48    
64     144    
-160   48     
528    352    
-464   352    
192    -48    
-192   224    
-368   48     
128    -512   
-304   -16    
336    160    
-368   416    
-80    -32    
-368   -112   
-96    304    
-128   -48    
224    208    
-240   128    
32     32     
16     64     
-32    48     
0      -16    
-80    16     
48     48     
-48    0      
96     96     
-368   -240   
-32    -288   
-96    -176   
48     -32    
-608   160    
-224   272    
48     96     
-64    80     
-64    16     
176    128    
-32    80     
-80    48     
80     64     
-96    -16    
16     112    
-96    32     
64     112    
-480   -64    
544    544    
-256   288    
-64    -688   
16     464    
160    528    
-160   -96    
160    128    
0      160    
-144   64     
64     -288   
-48    208    
128    288    
-176   -32    
112    48     
-16    448    
-288   416    
48     -528   
160    112    
-128   544    
96     -560   
16     144    
320    176    
-432   -160   
32     240    
192    16     
-144   16     
224    240    
-64    176    
112    560    
-160   -112   
288    736    
-32    160    
-64    -336   
368    64     
-96    352    
192    288    
-16    -192   
0      160    
32     -48    
-32    256    
-80    -272   
32     -128   
-80    208    
96     304    
-128   -560   
-112   -688   
176    -112   
-272   -48    
224    64     
0      192    
112    272    
-320   416    
240    368    
160    288    
-320   32     
-16    32     
32     64     
-32    -176   
160    64     
48     80     
336    144    
-64    176    
-192   64     
144    -32    
80     64     
160    -64    
128    -32    
32     16     
-16    32     
-32    176    
-32    64     
48     128    
-144   -32    
288    160    
-32    144    
112    0      
208    16     
16     16     
16     -112   
160    -240   
128    -96    
80     96     
-80    -32    
304    256    
-416   224    
256    32     
-192   160    
48     -112   
-48    -544   
32     112    
192    64     
-272   96     
320    112    
256    560    
-448   336    
128    32     
-416   -80    
192    -192   
-48    144    
272    272    
48     176    
240    112    
224    288    
-48    -832   
16     96     
64     0      
-48    -192   
112    -16    
64     144    
48     224    
-224   -112   
-16    128    
224    368    
-64    176    
16     80     
-80    80     
288    80     
80     208    
96     144    
-80    48     
304    -400   
-64    -80    
-32    -96    
192    -16    
-80    80     
144    176    
-144   -64    
272    -32    
336    160    
16     528    
192    160    
-80    -352   
128    -208   
112    -256   
144    80     
48     -576   
192    176    
-96    -1104  
80     -16    
256    32     
224    304    
-112   176    
96     176    
-48    -144   
160    80     
272    112    
144    0      
-32    128    
96     -160   
80     -48    
112    -48    
144    0      
112    -416   
240    224    
-80    0      
-16    128    
80     64     
-64    -48    
48     -32    
64     -32    
128    144    
16     -32    
32     80     
80     -160   
16     176    
400    0      
-176   64     
0      -256   
96     48     
0      64     
192    112    
-96    64     
64     48     
96     80     
64     80     
96     128    
-64    -48    
0      48     
64     -224   
112    96     
0      -272   
48     80     
-64    -784   
128    240    
-64    -32    
-16    208    
48     32     
-32    80     
144    48     
-128   -320   
144    208    
64     -96    
48     -288   
112    -112   
64     192    
-128   -176   
32     96     
208    0      
-128   160    
64     32     
-48    96     
80     -176   
16     -48    
176    -112   
-32    48     
64     240    
-16    80     
-80    64     
176    64     
-32    144    
32     -48    
64     96     
160    16     
-32    192    
96     64     
0      -416   
-16    32     
96     -688   
112    -176   
48     0      
96     -176   
-16    -272   
16     -2160  
240    -288   
16     176    
-32    -16    
80     96     
64     -224   
64     -160   
64     144    
16     0      
64     96     
112    -112   
112    48     
-32    48     
160    -256   
-80    -192   
32     -48    
160    -16    
96     -304   
192    -32    
-96    -720   
176    0      
112    -32    
112    48     
16     -16    
64     64     
-160   0      
112    16     
-880   -160   
160    -208   
-176   -16    
0      -16    
224    -64    
-128   -1024  
80     -288   
-16    -272   
32     208    
96     80     
16     -16    
80     -96    
0      176    
-80    128    
-48    -480   
160    640    
-240   -112   
160    -96    
32     -224   
208    48     
16     -176   
32     112    
0      -896   
32     416    
32     48     
-16    -224   
80     -80    
-80    16     
16     -48    
16     -160   
-400   272    
224    0      
-368   -224   
96     16     
16     240    
48     -16    
-64    0      
144    -224   
96     -112   
0      16     
96     80     
16     64     
256    224    
-80    192    
-32    352    
-48    -64    
128    64     
-176   128    
-80    -336   
64     -80    
-144   240    
112    48     
448    208    
-336   0      
-160   -848   
48     -160   
-80    16     
272    96     
-256   32     
48     -400   
96     -320   
256    -112   
-320   0      
-592   -544   
368    -688   
48     704    
272    416    
-256   -320   
64     32     
144    -624   
-192   208    
464    -16    
16     480    
-64    336    
-320   -272   
-64    -192   
-32    416    
-320   384    
-16    -112   
-96    -192   
336    272    
-80    288    
192    -368   
-400   336    
-80    -272   
224    0      
-592   464    
80     -576   
-224   -192   
112    112    
176    -400   
-128   336    
-272   -368   
256    -544   
-832   848    
-272   -160   
64     -336   
48     512    
160    208    
-768   -528   
-32    96     
-96    -80    
112    112    
-64    48     
32     32     
-48    -80    
32     16     
-112   -32    
64     224    
80     -368   
-704   -272   
-144   224    
-912   -656   
32     96     
-144   -64    
-272   -96    
0      256    
-400   -32    
32     304    
-912   -96    
112    -144   
-80    160    
528    640    
-368   -352   
-96    -192   
-272   288    
48     -304   
-112   144    
64     -112   
-160   32     
256    800    
-256   -32    
-112   -464   
-112   -176   
-416   -304   
256    0      
-144   352    
-48    16     
112    432    
-96    80     
-64    -224   
112    176    
-16    -80    
-96    64     
32     48     
-96    16     
-64    32     
-96    0      
-208   -176   
-336   -128   
128    432    
-880   -16    
-160   -320   
-320   -752   
256    224    
-160   48     
224    96     
-80    32     
-64    -48    
176    544    
-96    64     
-96    -144   
96     192    
-128   -32    
96     160    
-128   544    
-128   368    
144    288    
-256   144    
-16    96     
-96    -176   
32     -176   
-48    -112   
0      -96    
-64    0      
-32    -64    
48     112    
-64    48     
0      32     
-64    -32    
-128   0      
80     64     
32     176    
-256   336    
-32    336    
-192   -272   
224    64     
-48    48     
-144   -32    
48     80     
-48    0      
48     -32    
-16    128    
-128   112    
-176   -80    
64     0      
-192   16     
64     320    
-352   16     
16     48     
-80    -128   
0      80     
208    224    
-112   0      
272    -192   
-208   -128   
208    64     
-96    80     
96     96     
-80    96     
128    -176   
-240   -160   
16     112    
-272   208    
176    -48    
-96    -112   
96     32     
128    240    
-112   128    
-80    128    
-16    64     
-112   16     
160    -16    
16     96     
48     64     
-32    96     
-32    32     
160    96     
-144   32     
112    96     
208    112    
-80    48     
-80    16     
112    224    
-208   128    
-112   -112   
176    -16    
144    144    
16     48     
-144   0      
-80    112    
-112   -16    
-80    112    
-32    208    
-192   224    
-112   496    
336    80     
-112   80     
400    128    
-208   64     
32     -336   
80     112    
48     224    
-352   -144   
-256   -224   
128    112    
-112   224    
160    224    
-112   32     
64     16     
-160   -64    
112    -224   
-48    -16    
0      -112   
208    304    
80     32     
144    192    
32     -32    
-288   -96    
48     -64    
192    208    
-192   160    
144    160    
208    336    
-368   192    
-48    272    
16     224    
192    304    
-144   240    
-80    -144   
-80    0      
112    96     
-112   32     
-144   32     
256    144    
128    16     
-80    -80    
-64    64     
80     -16    
192    32     
80     144    
32     64     
-64    16     
96     128    
-16    32     
48     48     
48     64     
0      -64    
144    96     
-272   48     
160    80     
-16    96     
-96    32     
-32    160    
144    48     
32     112    
80     32     
32     48     
-32    -64    
-80    -32    
128    80     
80     112    
-16    176    
-176   160    
-160   16     
336    128    
-48    -32    
64     -448   
0      96     
64     32     
-32    16     
80     96     
96     48     
-96    -16    
80     96     
-80    0      
128    144    
-112   32     
64     112    
32     -80    
48     32     
0      48     
64     -1056  
48     112    
48     16     
-80    112    
208    64     
-96    48     
144    48     
-48    -32    
-64    -96    
208    112    
-48    96     
0      -16    
16     64     
-32    192    
80     80     
-112   -336   
-32    -80    
384    -928   
-48    64     
32     48     
32     192    
-128   -32    
112    144    
48     128    
160    272    
144    0      
-80    128    
16     -16    
112    96     
112    272    
144    16     
16     432    
32     -528   
112    208    
48     96     
-16    -112   
48     -32    
144    544    
-32    304    
-96    16     
96     -48    
-176   -320   
-16    -48    
16     0      
64     336    
16     80     
16     32     
320    -160   
-192   -48    
-32    -1040  
192    16     
80     -160   
64     528    
-80    -192   
80     144    
48     -96    
-144   144    
16     80     
64     96     
144    0      
-64    -16    
-16    224    
48     -320   
0      160    
64     -224   
128    96     
-32    144    
80     80     
-32    -16    
-32    240    
-48    -240   
128    864    
0      -128   
-144   -256   
160    224    
-32    -64    
-48    432    
-16    -256   
112    32     
256    224    
-208   336    
-224   -368   
144    -48    
80     480    
48     384    
-96    96     
-64    160    
192    64     
-128   -544   
160    -176   
-128   -480   
176    320    
-96    160    
16     32     
-160   -224   
0      -80    
0      32     
336    192    
-32    -32    
-208   32     
-32    -576   
208    -576   
-48    176    
176    80     
144    160    
80     96     
48     320    
96     -80    
-272   -448   
336    -224   
112    224    
96     64     
-160   -160   
80     128    
16     -48    
-96    -864   
144    -304   
80     -320   
48     128    
96     352    
-48    -176   
128    -528   
-16    -432   
-80    -160   
176    0      
80     -112   
176    48     
80     -144   
352    272    
-64    -80    
-464   -960   
224    -464   
416    512    
-352   352    
432    -864   
-192   -208   
272    80     
-208   -192   
32     368    
-160   -656   
0      -1024  
320    48     
-288   -672   
48     80     
80     -32    
64     80     
-112   224    
64     -16    
0      -464   
48     -272   
208    304    
0      64     
-112   -176   
112    -80    
-32    192    
-64    -672   
-208   144    
128    -48    
-128   32     
80     160    
-48    -352   
-1264  -48    
-48    -128   
176    -48    
224    240    
16     0      
480    -288   
-576   -544   
352    -2800  
240    144    
96     32     
240    144    
16     304    
240    240    
-176   -32    
192    368    
-240   -128   
128    -192   
0      -16    
80     176    
-32    -304   
160    -48    
48     -16    
112    -640   
48     256    
0      48     
144    400    
-16    -80    
-32    -512   
0      -320   
-96    256    
224    256    
48     -48    
-784   -16    
112    -368   
-192   -240   
256    208    
96     64     
64     -736   
0      48     
160    320    
176    320    
-96    128    
112    -48    
-32    144    
256    16     
-224   -128   
240    -48    
-80    -224   
48     -144   
-896   80     
96     -128   
-16    -128   
128    -304   
96     48     
-192   -560   
304    224    
-64    80     
16     112    
32     224    
144    80     
-32    32     
-96    48     
-64    64     
32     -16    
-384   32     
80     -96    
96     64     
112    -208   
208    304    
-48    -320   
112    48     
128    48     
-32    -304   
64     -144   
160    -80    
64     96     
144    80     
16     -48    
0      -48    
-64    112    
96     -192   
-80    48     
128    -96    
-160   96     
112    -32    
112    -96    
-176   -144   
32     0      
48     80     
80     -64    
-224   0      
224    -32    
-160   -16    
-80    -176   
-64    -32    
0      -176   
128    0      
-112   -192   
288    96     
-432   0      
448    96     
-224   0      
-176   80     
32     112    
-48    64     
-160   -32    
48     -304   
-304   -480   
32     -64    
48     688    
-144   352    
-112   112    
-352   -128   
-64    160    
16     80     
-512   -192   
64     96     
-160   80     
112    64     
-752   -128   
-96    -224   
0      -48    
-80    144    
-224   -144   
320    144    
-144   -400   
-112   -464   
-256   -336   
-256   -320   
112    -144   
-48    -32    
80     320    
-80    240    
-176   96     
-384   208    
-384   80     
208    96     
-240   32     
-48    144    
320    144    
-64    -96    
80     16     
16     -96    
32     80     
96     160    
-112   96     
112    144    
-144   -96    
-16    80     
352    448    
