# Supplementary material for: A Fault Diagnosis Method for One‐Dimensional Vibration Signal Based on Multiresolution tlsDMD and Approximate Entropy
Source: Hindawi journal article supplement (doi:10.1155/2019/3262818), 2019-01-01
Supplement: f1 [file 3262818.f1.zip › 3262818.f1/gear signals/wear gear signal/Data8.txt]

-64    -496   
240    -16    
128    528    
-16    288    
112    192    
48     16     
-144   112    
-16    336    
48     112    
16     160    
96     128    
-32    864    
-48    -960   
32     -272   
-16    -272   
-160   112    
96     -2240  
-48    -144   
272    112    
-128   -304   
192    176    
192    560    
-320   -208   
112    112    
-240   192    
176    16     
-336   -144   
432    -128   
-128   672    
160    -704   
-224   352    
48     -560   
272    -96    
-112   896    
112    -704   
-192   -304   
144    128    
128    -368   
-32    624    
-240   -560   
288    640    
-112   144    
-208   -368   
80     400    
-128   16     
16     64     
-80    -368   
0      112    
-96    -1520  
128    0      
-160   -112   
64     112    
32     48     
-48    128    
-112   -112   
80     -208   
256    448    
32     176    
-32    -256   
128    512    
-32    -416   
-96    192    
112    48     
16     -1760  
-96    304    
32     -320   
176    416    
-32    16     
-112   -16    
-208   -864   
176    816    
224    -208   
144    0      
-80    336    
16     -608   
80     560    
352    -672   
-336   -320   
256    -32    
-32    576    
128    16     
288    800    
-272   -288   
160    16     
32     -400   
64     -800   
160    320    
160    -32    
16     64     
-80    -80    
80     96     
0      -64    
48     80     
80     -64    
64     48     
272    144    
-176   -176   
-192   32     
-32    288    
48     560    
0      -736   
-96    -128   
144    -128   
-64    160    
0      -336   
192    -128   
32     464    
112    176    
-48    -416   
224    80     
-48    48     
48     544    
128    352    
96     240    
128    -80    
64     32     
96     -1056  
32     -160   
-48    80     
-48    -48    
176    -48    
16     -288   
128    128    
16     -80    
-32    -816   
64     -112   
96     -160   
-400   -704   
128    -448   
16     -1056  
-32    -144   
208    32     
-320   80     
128    208    
208    96     
-96    112    
-16    -32    
-48    208    
208    -96    
144    0      
-48    96     
-48    -48    
-16    16     
-256   -272   
64     -160   
-1312  -16    
-80    48     
48     -16    
-32    -304   
48     -112   
-256   -1040  
336    0      
-144   -16    
80     -32    
16     -48    
80     64     
208    160    
-304   288    
48     32     
-144   -400   
-192   48     
144    16     
-96    -80    
32     -336   
96     16     
32     -224   
80     48     
48     -1296  
-352   96     
80     -32    
-112   96     
16     -48    
-128   -48    
32     -96    
48     -16    
-448   -144   
96     -144   
-944   -80    
64     -192   
80     80     
160    -80    
16     0      
320    -272   
-80    80     
128    -64    
64     176    
48     144    
64     112    
-160   48     
224    224    
-432   80     
-192   272    
-368   0      
-96    96     
272    112    
-224   -176   
48     -528   
16     16     
16     208    
-96    -448   
112    144    
-16    192    
-96    16     
96     48     
96     -64    
-32    -48    
32     112    
0      208    
-112   64     
-1408  160    
208    -112   
256    16     
272    -32    
48     64     
64     -64    
128    64     
-48    -128   
-64    -144   
0      16     
-208   -192   
-592   -240   
272    -208   
-80    -176   
-32    -464   
-496   -112   
16     -48    
256    64     
-112   -80    
176    96     
160    -208   
-64    -96    
-256   160    
400    64     
48     48     
304    192    
-448   0      
160    48     
-80    -32    
240    80     
-880   -32    
160    0      
16     96     
112    -240   
32     0      
32     -512   
320    -32    
-80    160    
144    -160   
-176   -80    
272    -32    
-416   32     
144    -16    
0      64     
32     -64    
-48    0      
-64    -96    
128    112    
-848   -96    
-16    -144   
-48    64     
-480   16     
-272   96     
-368   -64    
-304   -32    
64     -80    
-64    -16    
-16    32     
-16    0      
-48    -208   
-64    -48    
-336   -112   
176    96     
-160   -32    
-208   64     
16     80     
-96    -16    
112    16     
-208   16     
80     112    
-608   0      
48     80     
64     -96    
32     -48    
-128   -112   
-48    16     
-192   -128   
32     64     
-64    0      
112    0      
-112   16     
64     144    
-176   96     
16     48     
-32    64     
-80    -160   
16     -272   
-208   -288   
32     256    
-160   -112   
160    320    
-80    64     
-192   -352   
16     -256   
-160   -304   
-96    96     
-144   -208   
80     -48    
96     32     
-176   -144   
-96    -320   
-96    -64    
-592   -32    
16     240    
-48    192    
-80    -288   
-80    -416   
96     -48    
-112   272    
272    48     
-48    336    
-32    48     
16     -192   
-144   176    
-96    -128   
64     -32    
96     240    
-144   64     
160    528    
144    160    
-32    288    
-32    160    
-80    96     
96     288    
-144   -128   
0      112    
-16    16     
272    288    
-256   144    
-192   -288   
304    224    
-160   96     
-48    -48    
48     160    
-1040  -128   
0      128    
176    48     
-240   208    
32     -128   
-16    352    
16     96     
-256   -32    
48     -32    
-112   144    
-96    304    
-96    -128   
-32    -64    
-32    304    
-176   352    
-832   -416   
128    -32    
192    320    
-96    368    
-208   96     
176    32     
-128   -224   
192    -192   
-48    -48    
192    240    
192    384    
-320   128    
176    -112   
-352   64     
-16    -144   
128    -304   
48     112    
96     -96    
-16    -16    
560    560    
-16    656    
-112   240    
256    112    
48     176    
-160   -48    
240    -80    
176    160    
384    448    
-176   48     
64     128    
16     -16    
0      112    
160    -224   
176    -144   
144    176    
176    288    
16     128    
-48    -272   
160    -160   
64     672    
-96    752    
96     112    
224    192    
-192   16     
-32    96     
-400   -176   
-32    -64    
-48    -96    
16     176    
-320   480    
448    -976   
-272   272    
272    624    
-240   -256   
160    -48    
-160   16     
32     -144   
848    736    
-576   224    
48     -928   
176    288    
224    192    
160    96     
-64    80     
112    -16    
224    480    
16     592    
-192   -256   
224    -240   
160    288    
-80    272    
144    0      
-32    -176   
32     64     
-64    -464   
304    272    
-48    -160   
112    -144   
-80    96     
176    128    
0      128    
16     144    
112    224    
-16    192    
-304   -128   
64     32     
64     -368   
32     304    
-192   112    
-32    0      
240    576    
-64    176    
-48    -112   
96     208    
96     352    
-16    0      
16     96     
-48    528    
-48    -464   
32     192    
128    144    
-160   -96    
416    192    
-272   352    
336    -288   
-304   -304   
64     -16    
-224   -128   
528    608    
-240   480    
208    192    
32     -112   
-96    -144   
48     192    
128    384    
-208   -272   
112    -320   
128    368    
32     208    
112    -1424  
-144   -272   
144    176    
16     -16    
80     80     
0      80     
-128   32     
224    240    
-224   80     
304    224    
-272   112    
112    192    
-128   16     
112    64     
48     32     
160    -48    
64     48     
-32    176    
208    448    
192    128    
-32    -16    
144    0      
64     80     
80     -64    
32     0      
80     64     
80     176    
64     144    
80     176    
48     48     
64     80     
128    32     
-48    -736   
144    32     
80     80     
16     192    
128    128    
112    48     
-112   80     
144    192    
-32    96     
-16    80     
64     96     
-112   -96    
64     128    
112    -320   
0      -48    
16     -1072  
240    256    
-144   64     
-96    144    
304    -240   
-64    80     
-160   0      
32     176    
-48    -32    
0      -64    
112    160    
192    -96    
-224   64     
160    -144   
-80    48     
128    -288   
-16    48     
32     -448   
0      48     
-288   -48    
144    368    
-112   64     
192    -144   
-80    -64    
240    192    
0      -16    
80     -16    
0      112    
-80    128    
112    -192   
288    -384   
-48    96     
144    -112   
64     128    
176    -304   
48     16     
352    320    
-176   176    
112    320    
48     96     
208    384    
64     -96    
-112   96     
48     -160   
80     96     
-224   -368   
80     -128   
48     -192   
192    160    
-144   -128   
112    80     
-80    -192   
0      32     
-16    112    
208    0      
-96    16     
96     -112   
128    96     
128    -352   
48     80     
128    -128   
320    592    
-528   224    
176    -32    
-160   144    
160    80     
-112   64     
48     -16    
192    144    
-80    -128   
272    112    
-144   -16    
-96    16     
144    -48    
-32    80     
0      -64    
-112   48     
128    96     
128    -576   
-32    0      
176    -32    
192    80     
-64    -32    
160    -272   
48     -128   
-128   -352   
144    -80    
48     -1248  
-192   32     
128    64     
-208   -176   
480    96     
-32    -80    
208    -704   
-96    80     
160    -416   
192    208    
-464   0      
64     16     
96     -80    
-32    -64    
384    -128   
160    192    
-16    -96    
48     -1552  
144    -16    
384    192    
-368   112    
160    0      
-80    80     
176    -160   
64     0      
-112   16     
112    -192   
-176   -144   
144    16     
16     -80    
32     -96    
-96    -224   
64     -1584  
48     16     
208    224    
48     32     
48     64     
-80    0      
256    80     
32     16     
-272   96     
-32    0      
80     128    
0      -48    
48     -80    
288    -128   
80     0      
-144   -288   
-16    0      
208    -1344  
-112   224    
96     -48    
-48    -64    
-64    64     
208    48     
-112   144    
288    112    
-176   -352   
304    16     
-1872  288    
64     320    
48     224    
176    192    
-16    224    
112    -128   
128    32     
-32    0      
0      -144   
32     16     
0      -32    
0      48     
-16    -112   
-112   16     
32     -144   
-192   16     
64     -48    
112    112    
64     -240   
-112   -448   
96     -592   
-48    272    
-32    160    
80     -384   
-16    112    
192    448    
-256   -368   
112    112    
-128   368    
48     -112   
48     64     
-32    16     
-240   -48    
32     -16    
-32    -224   
80     48     
64     176    
16     -1248  
16     -384   
64     16     
32     32     
-288   -112   
224    112    
-144   144    
16     176    
-112   112    
-96    -176   
-224   112    
64     -80    
-16    48     
96     0      
112    288    
64     -272   
-208   -384   
128    48     
-48    272    
-112   160    
80     112    
-112   96     
128    -48    
-112   -16    
112    -32    
-112   32     
176    32     
64     112    
160    -192   
32     64     
-64    16     
-192   -16    
16     80     
160    48     
-160   -32    
-16    -48    
-176   -256   
224    -192   
-192   48     
160    -128   
-96    -48    
-576   -112   
80     144    
-704   -272   
128    160    
-256   240    
-80    -96    
-304   -240   
-848   64     
-16    -112   
-656   -112   
-288   -144   
-32    -32    
336    384    
-400   384    
-80    288    
-352   -416   
64     -384   
192    -240   
-240   0      
32     96     
-144   160    
-112   352    
-336   288    
-336   224    
112    256    
-128   352    
-96    48     
-160   -256   
16     -432   
144    -96    
-96    -256   
-16    32     
240    -112   
432    368    
-288   208    
-192   32     
128    16     
64     288    
0      -64    
128    -304   
144    528    
-1088  -80    
176    -288   
112    496    
240    432    
-80    320    
-144   -160   
288    -144   
-80    160    
64     80     
-224   -160   
-96    80     
-32    272    
16     -16    
-368   -304   
128    -208   
-96    256    
192    -112   
48     144    
208    192    
-144   -48    
256    432    
-512   -976   
640    0      
-256   432    
-96    -304   
288    -480   
176    -208   
80     48     
-80    288    
0      -96    
-16    -272   
16     112    
-80    192    
-80    272    
176    -192   
-16    -352   
-48    -288   
-48    -16    
-48    96     
-144   -176   
-64    -48    
32     -16    
-128   -32    
-160   -192   
0      0      
0      32     
-64    16     
-240   -48    
192    48     
-288   -16    
240    128    
-160   -32    
288    80     
-288   -32    
-80    -16    
48     -80    
80     96     
-32    16     
32     48     
-144   32     
-208   0      
-128   -32    
64     -16    
144    160    
96     176    
16     192    
80     112    
-96    16     
32     0      
-16    -16    
-16    -48    
0      -16    
16     144    
32     192    
-16    96     
-112   -64    
-144   96     
-16    64     
32     112    
-128   48     
80     -64    
64     32     
16     160    
64     64     
-96    -128   
240    64     
-240   -256   
64     -256   
-144   -192   
96     -16    
-48    -80    
-80    48     
-80    16     
128    176    
-240   160    
48     -64    
48     80     
32     32     
96     0      
16     160    
208    496    
-176   96     
0      -32    
368    176    
64     336    
-272   -48    
96     80     
240    48     
-32    48     
96     128    
80     -48    
32     -32    
-16    48     
224    112    
-48    64     
48     96     
16     48     
128    160    
32     112    
48     48     
-96    16     
112    112    
-96    48     
96     192    
32     80     
48     144    
-64    64     
-128   -32    
48     64     
-48    48     
80     80     
192    128    
-256   -32    
80     48     
-176   160    
-96    96     
32     0      
-144   16     
272    112    
-80    -48    
-144   0      
144    -32    
128    -16    
-16    48     
192    288    
64     48     
-112   -16    
-32    48     
-48    32     
48     80     
64     16     
-80    -112   
16     -144   
-32    -224   
32     96     
32     96     
-16    96     
32     128    
48     144    
-224   -80    
272    32     
-96    -112   
32     112    
-112   144    
-16    64     
64     -144   
64     -1344  
-96    128    
64     128    
-160   96     
112    112    
-64    32     
32     -96    
-112   192    
32     0      
-144   80     
224    48     
16     112    
-208   -32    
192    -16    
0      64     
272    -512   
-304   112    
-80    -288   
64     128    
112    144    
-128   96     
144    64     
-144   -160   
32     -64    
96     80     
32     0      
384    512    
-336   464    
-32    -144   
-16    144    
80     -32    
240    304    
-400   240    
64     -96    
-32    16     
480    432    
-336   128    
32     -16    
128    160    
48     0      
0      64     
80     80     
-80    -16    
-128   -224   
288    128    
-80    -112   
-192   -176   
160    -352   
0      112    
-160   32     
144    208    
-112   32     
-16    32     
16     -336   
96     112    
-112   -80    
-80    112    
272    64     
-112   -80    
-16    80     
112    -192   
-64    -48    
112    -192   
176    224    
64     -1104  
-48    48     
192    128    
-112   176    
-48    -32    
96     -48    
176    112    
-160   -96    
176    16     
96     -96    
160    64     
-48    -208   
160    144    
-32    -176   
-144   -192   
288    -928   
48     80     
272    96     
-224   -48    
-32    208    
80     112    
-96    16     
-16    -112   
-16    32     
-32    -144   
96     80     
16     -496   
0      -112   
144    -80    
176    224    
-96    -352   
-80    0      
192    144    
-128   32     
176    -176   
32     -80    
48     320    
128    -96    
48     544    
80     -96    
176    256    
48     576    
48     -224   
64     112    
16     -96    
304    -288   
208    656    
-64    64     
48     48     
-384   -176   
464    -480   
-128   576    
272    -64    
64     384    
0      -176   
368    -64    
-208   96     
320    64     
0      -48    
224    96     
-224   32     
224    112    
-32    48     
48     -448   
48     64     
80     32     
-48    -1712  
32     -256   
32     -1056  
336    0      
-288   32     
96     -416   
112    -48    
-64    -16    
368    144    
-112   224    
160    -960   
16     208    
-96    -288   
176    -176   
-176   112    
0      112    
128    0      
-16    -336   
208    -144   
32     -608   
144    -16    
-64    80     
176    16     
48     -96    
-64    -96    
160    0      
160    544    
208    160    
-80    48     
-128   16     
64     -224   
48     -16    
80     -336   
48     -192   
96     -736   
48     -128   
432    -576   
16     288    
32     0      
0      48     
64     -48    
-64    144    
144    -32    
-32    -32    
-288   -192   
-64    -128   
-832   -112   
16     -16    
-32    -64    
160    -192   
-32    -48    
160    -208   
-16    -144   
-32    -112   
160    -64    
80     112    
-64    224    
48     -48    
80     288    
-80    -144   
272    224    
-352   32     
128    -32    
144    448    
336    624    
-272   176    
96     -128   
64     32     
-96    -352   
96     240    
-64    48     
144    -16    
-32    432    
272    304    
-128   -144   
288    352    
96     144    
-16    -96    
-864   -160   
48     -176   
576    368    
-368   -176   
112    16     
-48    -928   
-16    -256   
48     256    
0      256    
-16    -112   
80     272    
0      352    
-48    -128   
64     -48    
-32    -320   
-192   -192   
-16    -96    
192    400    
48     -288   
-64    -144   
48     -784   
176    80     
-48    240    
48     128    
0      128    
-64    -64    
16     112    
-144   240    
-16    -48    
-80    -32    
64     -160   
32     32     
288    80     
-128   -368   
224    256    
192    336    
-288   256    
320    -128   
-32    64     
-64    0      
80     48     
-256   32     
48     -32    
-208   -272   
224    -80    
0      208    
160    0      
-320   96     
16     -112   
176    112    
32     -80    
80     96     
16     192    
-128   64     
-176   -336   
-48    -208   
-304   -512   
112    -272   
32     32     
-48    -16    
-320   -64    
-48    -176   
-16    48     
96     80     
-160   64     
-736   -176   
352    -16    
-208   80     
-400   32     
-224   32     
192    32     
-64    80     
64     16     
-112   96     
144    64     
-224   16     
0      -16    
16     48     
-400   -112   
16     96     
-592   -224   
-368   16     
-96    96     
-128   48     
32     -16    
-336   16     
48     128    
-336   -112   
16     112    
176    64     
-48    32     
-64    -64    
144    -48    
-96    -128   
0      112    
-240   -464   
-64    32     
80     96     
-144   -48    
-112   48     
-416   -32    
-144   0      
-448   -64    
0      160    
416    48     
-240   -48    
-176   -32    
192    48     
-144   -208   
80     -64    
48     32     
32     16     
0      16     
-128   -48    
112    112    
-288   -192   
-16    32     
80     128    
-288   0      
-160   80     
-32    -112   
224    336    
-352   128    
96     48     
-48    32     
32     144    
-48    -48    
-176   48     
64     32     
-32    80     
48     -176   
64     160    
-288   -128   
-224   16     
-288   -64    
96     64     
-144   32     
192    80     
-32    0      
-32    16     
-64    32     
-32    16     
32     128    
0      48     
-160   64     
-112   16     
-144   -32    
-192   0      
-80    0      
-272   48     
128    112    
48     -16    
-48    96     
64     -176   
-48    -112   
-192   -32    
272    64     
-48    112    
-96    192    
128    144    
-160   16     
-96    16     
128    96     
80     64     
-448   -32    
448    16     
-288   -64    
-16    48     
-64    112    
128    0      
-16    -16    
32     -16    
-128   -64    
-144   -240   
32     -80    
-176   -48    
128    32     
-64    80     
160    48     
-256   64     
160    368    
-432   144    
-32    160    
0      64     
80     0      
128    32     
-160   32     
144    48     
-16    64     
-96    -96    
256    -80    
-112   -32    
80     48     
48     144    
-320   -96    
128    144    
-96    64     
-96    64     
80     0      
-32    80     
176    144    
32     160    
-48    16     
-16    128    
-48    -96    
112    -64    
80     96     
96     112    
-112   176    
-112   -64    
112    192    
16     32     
112    16     
-160   16     
64     480    
80     288    
-48    48     
96     48     
16     80     
-208   -80    
-48    -16    
128    144    
-48    -112   
0      32     
-160   80     
160    80     
-160   80     
144    96     
-48    64     
32     64     
-176   160    
208    16     
0      80     
96     48     
-128   0      
160    80     
-32    144    
256    400    
16     112    
-192   -176   
-80    -32    
144    224    
208    80     
-16    32     
-64    240    
-32    32     
-144   112    
112    160    
-80    96     
-48    48     
0      0      
-48    112    
128    80     
-48    64     
-16    176    
128    176    
-80    0      
0      -16    
144    96     
-160   -192   
-32    -32    
160    96     
112    144    
-144   208    
160    176    
16     464    
288    592    
-48    256    
304    304    
-288   -160   
32     64     
160    192    
-192   -304   
96     80     
0      128    
0      80     
48     0      
32     -16    
16     160    
32     -368   
-16    -112   
80     384    
-176   192    
400    80     
-80    16     
144    -2544  
-112   -384   
64     208    
208    640    
-112   32     
-16    -144   
144    304    
96     272    
-208   -144   
192    256    
-16    -16    
32     16     
0      -32    
144    176    
-32    112    
64     -624   
-16    384    
48     -16    
-128   176    
256    -96    
-144   96     
368    112    
-272   64     
96     96     
160    112    
-48    -64    
64     80     
-112   0      
240    -128   
-64    80     
80     -576   
48     32     
64     288    
272    176    
-208   96     
-16    160    
-128   -176   
-16    16     
160    -96    
48     80     
-128   -304   
-32    -208   
-64    16     
-80    -352   
144    112    
112    192    
144    112    
-32    -1232  
112    -128   
-16    -80    
192    -160   
96     -32    
48     96     
32     64     
64     112    
144    112    
-96    -48    
144    64     
-32    -128   
0      96     
-160   -176   
144    128    
16     144    
32     16     
16     -784   
16     -48    
352    496    
-32    784    
64     128    
96     480    
96     272    
32     -80    
32     48     
96     -96    
-144   -48    
224    -16    
16     128    
16     -160   
80     320    
32     -512   
-64    64     
-32    -176   
64     112    
48     48     
0      112    
-64    112    
-176   -464   
240    -160   
96     224    
-176   192    
80     -352   
144    240    
16     224    
64     -112   
48     -720   
-288   -192   
352    -912   
160    752    
-16    -528   
-48    640    
96     16     
16     144    
-32    128    
192    -528   
144    624    
-224   -432   
112    -64    
128    464    
-48    -128   
128    -112   
64     96     
192    320    
-176   -96    
80     -176   
112    -80    
176    160    
160    -240   
-192   -320   
-32    -400   
32     -16    
80     -208   
192    336    
-96    0      
0      240    
16     -352   
-16    -16    
32     -112   
-368   -1072  
16     -384   
-496   -80    
96     -160   
96     128    
320    192    
336    288    
-176   -1024  
-32    -80    
224    -144   
176    0      
160    256    
-144   48     
32     -240   
160    192    
-64    -448   
0      -32    
-32    240    
352    -48    
-576   -464   
592    -512   
-64    208    
-144   -1024  
-64    -16    
96     -448   
-80    96     
32     0      
-96    112    
128    -240   
-176   96     
176    16     
16     -16    
-208   32     
-32    -80    
48     -48    
-112   -480   
112    -16    
80     -368   
-96    -32    
112    -320   
-112   -304   
192    -96    
-240   32     
-64    -128   
160    32     
192    128    
64     0      
-576   -64    
320    32     
-288   32     
-272   32     
208    0      
-16    -32    
176    112    
-192   32     
192    -16    
48     -576   
128    128    
-192   -32    
64     64     
48     -64    
48     -48    
80     80     
-96    -144   
-144   48     
208    80     
32     32     
128    -128   
112    -80    
16     -368   
32     80     
224    -608   
48     32     
128    64     
128    48     
-64    16     
16     96     
-160   -208   
160    -80    
-176   64     
128    -128   
-672   -64    
128    -112   
-96    32     
0      -96    
96     -240   
-48    -864   
192    -32    
-16    -80    
144    32     
-224   -48    
112    0      
-64    64     
96     -48    
-64    -32    
-64    -128   
112    112    
0      -32    
0      544    
-496   -16    
0      32     
160    -256   
16     112    
96     -480   
-96    64     
-16    -208   
192    80     
-384   -16    
48     -192   
208    192    
32     96     
-64    32     
0      -48    
32     -16    
-80    -240   
176    128    
48     -144   
-16    64     
288    256    
-208   176    
-576   0      
96     16     
-176   -48    
80     0      
-128   16     
208    192    
-32    48     
-32    -64    
-192   -32    
240    -64    
-176   48     
112    -80    
64     48     
-208   16     
-512   176    
-272   48     
80     32     
-32    32     
144    48     
-256   -80    
80     -80    
16     32     
-96    -144   
128    96     
-800   -96    
0      80     
-304   -96    
-1120  -304   
352    -224   
-1232  48     
64     224    
-480   32     
-32    32     
144    48     
-176   0      
-64    -160   
112    48     
-16    48     
112    224    
-304   -112   
80     80     
-112   -112   
-368   32     
64     0      
-512   16     
128    16     
-288   48     
80     48     
-1424  128    
-80    32     
64     16     
-48    0      
128    -80    
-16    -16    
64     -192   
16     128    
32     -32    
176    48     
80     144    
-240   96     
112    16     
-80    96     
80     48     
-272   64     
16     384    
-832   128    
-64    -64    
80     -48    
64     112    
-288   -432   
80     48     
304    256    
192    -112   
-144   192    
32     256    
-304   -160   
208    -48    
-224   -176   
256    -320   
-32    288    
-368   272    
16     96     
-32    -48    
80     192    
272    112    
-192   128    
-48    48     
-240   -80    
160    112    
-432   64     
-80    224    
-64    16     
-32    64     
-160   -176   
160    -32    
-496   -208   
48     0      
-80    -112   
96     -32    
288    -336   
80     -32    
32     112    
-208   -288   
-96    -176   
192    32     
32     112    
80     16     
-352   -368   
160    -160   
-112   272    
-32    112    
48     -32    
-256   -48    
32     144    
48     352    
96     336    
-384   -80    
-384   -112   
-32    -208   
32     -128   
-16    80     
-128   80     
-96    -96    
176    -400   
16     304    
32     -464   
256    128    
-656   -96    
288    112    
-112   128    
192    144    
64     448    
-160   -256   
0      80     
-144   80     
-48    -80    
0      80     
64     64     
-64    80     
64     64     
-176   -64    
112    112    
-176   -144   
48     112    
-64    16     
-16    48     
0      240    
-144   -496   
512    80     
-176   384    
-32    -80    
160    -176   
-64    128    
48     272    
64     192    
224    272    
-384   288    
-48    -128   
-176   -368   
112    -48    
32     48     
128    496    
-112   -96    
-96    -48    
128    0      
208    16     
64     896    
-240   -192   
-112   -336   
112    160    
-16    48     
-256   0      
96     48     
112    192    
-48    32     
16     -16    
-80    16     
192    128    
-16    144    
-16    -16    
0      64     
-32    48     
96     16     
-384   288    
192    -160   
-432   -512   
48     320    
112    112    
-112   32     
32     -64    
-96    -160   
32     -96    
-32    -80    
96     -128   
144    416    
48     624    
32     -112   
128    384    
-16    336    
80     32     
-80    -48    
48     32     
-32    -64    
112    -208   
112    144    
160    -80    
-16    224    
-32    80     
64     -32    
16     240    
-48    48     
96     80     
-96    240    
304    448    
-224   432    
496    128    
-528   -384   
576    96     
-96    1248   
16     672    
-32    -240   
-32    -16    
80     -48    
48     176    
-32    64     
-32    224    
0      -208   
-32    176    
0      -304   
64     336    
112    -48    
-48    80     
160    240    
80     80     
-96    -128   
0      -16    
-48    16     
336    592    
-176   32     
112    -64    
304    384    
-208   208    
176    240    
0      16     
96     656    
32     384    
-176   -640   
160    304    
128    -112   
32     0      
32     16     
-16    -64    
96     112    
0      -64    
-160   208    
96     64     
-352   -144   
416    -96    
-80    16     
144    -64    
-128   96     
-16    -880   
160    32     
144    112    
64     48     
-432   -352   
416    -112   
48     272    
-144   224    
-224   -64    
-80    0      
160    64     
-128   160    
-96    16     
-16    -176   
-112   112    
352    0      
176    368    
-80    -1856  
-112   304    
64     240    
-176   16     
0      32     
64     96     
128    144    
-192   224    
240    144    
32     48     
0      112    
112    -32    
-32    32     
96     -64    
96     480    
-208   -1280  
48     144    
464    272    
-336   256    
16     160    
-16    80     
-176   -96    
96     -80    
96     80     
96     16     
-288   -16    
-80    -240   
672    112    
-240   -16    
288    0      
192    -528   
-32    112    
-96    -704   
-32    32     
192    -64    
-16    144    
80     48     
-16    48     
-64    -128   
0      16     
272    48     
-304   -112   
80     80     
-272   -304   
48     -48    
-80    -304   
80     80     
-192   -224   
64     80     
-80    16     
-16    16     
96     48     
192    96     
64     128    
-16    192    
224    192    
256    -576   
48     128    
176    48     
-192   -48    
240    16     
48     64     
-16    -128   
192    48     
-32    -16    
112    64     
224    160    
-144   64     
32     144    
128    -208   
0      160    
80     -384   
-48    96     
272    32     
16     128    
-176   -256   
256    80     
176    -320   
-112   80     
-16    16     
80     64     
-96    48     
176    -160   
112    -288   
0      -464   
0      144    
480    352    
-480   128    
256    -48    
-16    112    
160    -320   
-16    80     
-48    0      
96     -752   
32     192    
96     -368   
16     -144   
-1104  96     
32     -64    
48     -48    
48     0      
160    192    
128    -2048  
-80    -224   
128    272    
112    -96    
-256   -192   
176    192    
112    -16    
0      16     
80     -96    
-32    16     
-480   144    
288    240    
16     96     
-32    -528   
208    -416   
96     -368   
144    -48    
-16    -912   
176    -64    
16     -112   
144    128    
-64    -16    
-48    -64    
144    -208   
80     128    
208    64     
48     -80    
80     -80    
0      -128   
64     -32    
176    -160   
112    32     
-96    16     
0      -16    
160    -448   
-32    80     
-32    -64    
80     48     
48     64     
-64    16     
0      64     
160    -48    
-336   -64    
112    -96    
-16    192    
288    0      
-128   48     
96     -896   
0      -80    
-160   -288   
160    112    
336    272    
-272   192    
-128   48     
32     -112   
0      192    
208    -272   
-288   -144   
96     192    
-624   96     
-176   -512   
0      -128   
208    112    
-384   -352   
144    -736   
-80    48     
-96    -32    
32     64     
-160   32     
160    -96    
-144   -16    
192    272    
-192   -96    
48     -144   
-1008  -16    
96     -256   
128    176    
32     80     
112    -64    
176    144    
-112   0      
224    240    
160    352    
-208   176    
304    256    
-464   -416   
256    -80    
96     112    
-144   -272   
-144   32     
80     0      
-80    96     
128    -160   
-112   -32    
128    -448   
-80    80     
-336   -80    
32     -96    
-128   368    
-144   192    
-432   -352   
304    -144   
-32    480    
-272   -240   
-112   -288   
304    160    
-16    80     
-64    -384   
144    80     
-80    -320   
-128   -128   
208    -288   
-192   208    
16     -160   
32     304    
80     -80    
0      -112   
224    112    
-160   48     
576    288    
-544   160    
400    -112   
48     304    
-320   112    
240    -320   
32     32     
32     224    
-528   -96    
16     160    
-144   320    
-144   -112   
32     -448   
128    304    
144    240    
-48    288    
-592   -304   
0      -192   
-304   272    
-64    -208   
-224   -224   
-416   384    
32     112    
-112   48     
-240   -176   
-304   -288   
-16    752    
0      384    
-32    -272   
64     -32    
-160   -112   
48     96     
-160   128    
320    -48    
-224   48     
-96    -160   
-64    -64    
-112   -32    
-48    -336   
192    528    
240    512    
-304   -48    
-288   -336   
176    -48    
-224   272    
-32    -48    
64     -400   
16     384    
80     96     
-224   -304   
-64    -80    
16     -368   
-128   160    
160    496    
-16    304    
-48    -192   
-112   16     
-96    176    
176    224    
-736   48     
240    -128   
-272   -96    
320    16     
96     480    
-160   48     
-64    -640   
-16    -144   
-32    0      
32     48     
80     32     
-432   32     
48     -16    
-96    112    
-16    80     
-432   -16    
48     112    
-48    -64    
16     80     
-80    -80    
224    -16    
-128   160    
0      -64    
352    384    
-16    432    
-304   -976   
208    -128   
288    784    
-368   -48    
176    -512   
-128   240    
-160   -144   
-288   128    
-128   336    
160    400    
-192   -48    
16     64     
-32    176    
-32    -128   
64     384    
-80    96     
-80    160    
80     -128   
-160   -192   
-96    208    
-80    -288   
64     144    
-928   16     
96     -176   
-48    128    
288    416    
-288   -144   
-32    -144   
32     -48    
0      192    
192    416    
-64    -32    
-128   -112   
-128   32     
0      64     
32     -64    
128    16     
-272   -32    
64     -688   
192    -512   
-144   -256   
144    0      
-16    48     
0      192    
-32    224    
-112   176    
160    -112   
-288   -176   
144    64     
-176   256    
48     16     
-160   112    
-48    0      
-128   176    
128    208    
-80    -48    
96     96     
-112   -256   
48     16     
144    96     
-192   176    
16     80     
-112   80     
-128   0      
-16    224    
-128   48     
0      144    
32     0      
-112   32     
352    176    
-304   -64    
240    112    
-48    32     
80     80     
-112   -176   
208    -96    
48     0      
0      176    
-160   -384   
-16    288    
-80    -144   
-96    48     
224    160    
-16    64     
32     80     
-64    112    
160    160    
-464   0      
432    400    
-368   208    
-160   80     
112    48     
-192   -48    
48     -64    
112    208    
16     32     
-160   160    
-16    144    
-208   16     
-112   160    
-176   256    
192    336    
32     320    
128    176    
64     48     
-176   -16    
272    48     
16     208    
-96    96     
96     80     
-272   -208   
-16    32     
-80    -64    
-112   48     
-80    48     
-64    256    
-80    176    
-192   -16    
-16    144    
-224   -48    
-16    32     
-16    48     
160    192    
-16    112    
16     208    
208    256    
16     112    
-96    144    
304    304    
-64    304    
-256   160    
-80    16     
240    -16    
48     64     
-16    80     
-96    144    
128    64     
96     144    
192    192    
-112   80     
96     80     
96     -416   
64     16     
96     80     
16     64     
384    288    
-288   112    
352    304    
-128   192    
-32    96     
-128   96     
208    0      
176    144    
-272   48     
128    0      
144    112    
-160   -1072  
240    64     
176    112    
48     192    
112    80     
-48    0      
144    80     
-48    -48    
32     -16    
272    160    
-96    -144   
-32    80     
-48    32     
96     -64    
32     112    
-32    -160   
48     112    
176    176    
-80    144    
192    192    
-128   80     
80     240    
256    64     
-128   48     
224    80     
-80    64     
96     80     
-48    96     
-48    -144   
192    16     
-16    -32    
352    176    
-160   -656   
192    160    
-16    112    
112    96     
96     -288   
240    160    
-112   128    
160    144    
-288   -208   
160    -48    
48     48     
112    -144   
-64    48     
144    -144   
48     128    
176    -192   
-32    144    
0      -144   
0      -16    
240    -112   
16     208    
0      -16    
16     192    
-32    -80    
192    -16    
48     0      
-192   -208   
224    96     
64     -96    
128    96     
208    -544   
0      144    
-272   -688   
224    272    
-64    -32    
352    272    
-272   -176   
176    128    
-64    -176   
32     -240   
-16    -128   
160    -240   
48     32     
64     192    
-48    16     
-32    -144   
240    128    
80     -80    
-96    64     
192    496    
64     352    
-80    -128   
48     -96    
80     144    
-16    -144   
176    96     
16     -528   
-48    -208   
128    -352   
48     224    
128    576    
-48    -208   
48     336    
208    576    
-416   -1104  
128    -128   
-144   704    
96     16     
-32    992    
64     -288   
16     112    
-64    -144   
-64    -48    
96     -48    
192    640    
-32    96     
-128   -480   
368    -48    
-64    640    
-272   -432   
208    -832   
32     96     
-112   -128   
-64    -400   
112    -400   
160    240    
-16    -144   
208    -208   
112    320    
400    -32    
0      288    
64     96     
32     -144   
16     -192   
272    112    
-80    48     
-160   32     
-1344  -288   
128    -352   
-48    -128   
0      -528   
112    48     
-112   -512   
800    432    
-240   496    
-48    -64    
-176   -32    
64     -96    
-64    -400   
224    -80    
160    -160   
240    -144   
-320   160    
128    16     
224    -48    
0      288    
144    -192   
-208   -208   
224    32     
192    128    
32     160    
176    0      
-48    -128   
-16    -416   
336    160    
-16    416    
128    160    
-224   64     
16     -768   
-336   -176   
-208   320    
80     -624   
256    16     
-240   160    
448    -384   
-336   -32    
240    320    
-480   64     
208    -352   
48     16     
-160   448    
384    -64    
-208   224    
96     96     
-480   -176   
272    48     
-80    -128   
224    -368   
320    560    
-192   -320   
16     -48    
336    -432   
-16    -128   
48     112    
336    160    
-176   112    
144    -240   
-208   16     
192    -48    
-352   -48    
128    32     
-256   -32    
192    64     
-224   -192   
-208   144    
192    -544   
-112   -576   
736    768    
-400   960    
192    -1040  
16     624    
16     -208   
80     -240   
-208   96     
80     -864   
48     560    
112    32     
-272   -496   
-960   -64    
288    -32    
-176   208    
224    -32    
-144   112    
48     -1344  
224    240    
112    -192   
-64    -128   
-32    -272   
160    -176   
-256   176    
32     -240   
-160   224    
128    224    
-176   -352   
-112   -48    
144    64     
-16    -416   
-80    32     
-272   32     
96     48     
-128   48     
32     48     
336    304    
-432   -384   
-144   -352   
160    -176   
-240   -272   
224    16     
368    112    
-208   -256   
48     80     
176    -128   
-144   -208   
-144   -208   
128    128    
16     -144   
-208   -304   
160    -128   
-144   96     
-64    32     
48     80     
16     -16    
112    -176   
208    112    
-1280  -160   
32     144    
-768   -80    
-624   16     
-32    -32    
-752   -96    
-144   -64    
-1008  16     
-144   -96    
160    0      
80     112    
-224   -80    
160    144    
-1184  -128   
0      208    
-352   -112   
240    304    
-272   32     
-64    32     
-32    64     
32     80     
48     0      
64     48     
-240   64     
-32    80     
-176   64     
16     0      
-144   32     
-208   -112   
48     64     
96     176    
256    256    
-192   -96    
128    -224   
-224   16     
48     -16    
-208   -96    
96     -192   
-80    32     
-352   128    
16     224    
-448   -16    
16     48     
16     -16    
128    112    
0      -16    
-64    176    
-144   80     
64     64     
-80    80     
128    160    
48     176    
-416   -176   
224    0      
-528   -112   
160    240    
-848   64     
0      96     
352    272    
-368   304    
-144   -96    
-160   112    
16     64     
96     32     
16     96     
256    96     
-96    144    
160    160    
-160   112    
16     368    
-160   48     
-224   32     
-256   -576   
16     -1008  
-48    -400   
144    -448   
-208   -336   
336    112    
-384   -256   
32     272    
96     304    
112    288    
-32    16     
-32    32     
320    -48    
80     176    
-208   -16    
48     48     
-288   0      
64     128    
-96    240    
-48    128    
48     -48    
-256   -160   
96     -32    
-32    32     
80     112    
-192   16     
96     0      
80     32     
96     96     
-144   -80    
96     176    
-784   0      
48     160    
-64    0      
-80    80     
192    48     
-144   16     
48     64     
176    128    
-64    80     
-16    176    
-304   -32    
-176   -32    
80     144    
-80    -16    
304    256    
-512   -16    
176    96     
80     64     
112    64     
-160   32     
-16    112    
64     80     
-144   0      
128    80     
16     -48    
-128   16     
-16    96     
-176   176    
48     288    
288    128    
-576   -64    
-64    80     
80     16     
0      112    
-48    -16    
64     80     
144    0      
-32    0      
-144   -16    
16     32     
48     48     
-16    -16    
64     128    
-128   -16    
208    224    
-224   80     
128    48     
32     -32    
96     48     
64     16     
-16    64     
32     48     
-48    64     
32     112    
80     112    
-48    0      
-80    0      
32     112    
-48    -32    
-64    0      
48     96     
192    48     
-48    48     
80     208    
240    192    
-256   96     
144    32     
-32    48     
112    32     
-176   -48    
128    96     
-352   -352   
320    32     
-176   304    
272    112    
-176   -48    
-112   -224   
192    -240   
-112   -144   
144    192    
80     272    
16     176    
48     128    
-80    -192   
-32    0      
64     256    
-16    208    
64     272    
80     208    
-96    -160   
-16    96     
80     240    
0      96     
32     -80    
48     208    
0      128    
32     -128   
-112   64     
-128   -32    
224    -464   
-16    608    
-16    -592   
256    448    
208    160    
128    592    
96     144    
16     -688   
192    128    
16     240    
80     16     
-48    32     
96     192    
-96    112    
176    16     
-224   -16    
80     112    
-64    0      
144    288    
-64    208    
144    -1232  
-32    80     
48     64     
16     48     
-64    64     
32     64     
-32    -32    
144    448    
16     528    
16     96     
-16    -176   
-48    -16    
-80    -176   
16     -176   
-128   -128   
384    -864   
0      208    
368    208    
-48    112    
224    96     
32     48     
96     -16    
240    64     
-304   -304   
-64    -368   
16     -32    
-400   -192   
144    -240   
-144   -160   
272    -128   
160    -560   
-64    96     
-32    -128   
-160   64     
240    32     
64     240    
304    80     
-32    -128   
-144   -176   
32     -144   
32     -128   
64     -80    
64     112    
-32    -272   
-16    -96    
192    -208   
32     256    
240    -480   
176    560    
64     400    
-80    224    
16     -128   
64     112    
-48    -224   
96     336    
144    400    
320    272    
-384   -144   
16     -432   
32     16     
-288   -320   
112    160    
80     -384   
192    368    
-192   -1504  
-320   288    
128    0      
0      96     
-96    -128   
-64    272    
0      176    
-96    -272   
-80    352    
304    -272   
-32    304    
-112   64     
240    -432   
-224   -1072  
-16    112    
144    -208   
-128   128    
96     304    
272    272    
-352   256    
320    -96    
-240   272    
976    336    
-464   1056   
-144   -1024  
336    112    
96     288    
-32    -368   
32     -128   
32     -160   
-64    -336   
96     256    
-144   -608   
32     496    
240    336    
-96    352    
112    -16    
32     -224   
128    704    
32     -48    
-240   -272   
32     -368   
16     336    
16     160    
48     176    
16     -1088  
0      16     
-32    -144   
160    -96    
208    -176   
32     -1024  
128    -816   
32     -336   
-80    -304   
96     -144   
144    320    
32     16     
208    160    
64     -80    
256    160    
16     144    
160    -1040  
176    304    
112    80     
-32    -160   
-1472  -80    
192    -848   
-64    -64    
240    -1632  
-160   -64    
96     -480   
-96    -320   
96     -48    
160    -272   
48     32     
-48    -32    
48     -192   
320    160    
-128   -224   
64     -128   
-816   288    
-160   0      
256    304    
-288   -224   
64     80     
16     -48    
96     0      
-80    -960   
-32    -112   
224    -64    
-144   112    
352    80     
-320   32     
128    -112   
32     -144   
-48    64     
-48    -176   
-48    32     
128    -256   
-80    -16    
96     -560   
-32    64     
-80    -336   
240    96     
-32    -32    
-32    96     
16     -64    
-16    16     
-64    0      
32     -448   
-208   16     
128    64     
-560   96     
80     -272   
160    -144   
48     -160   
96     16     
-48    -112   
-80    0      
128    48     
-256   -96    
176    -64    
48     48     
-64    48     
16     32     
-112   16     
112    -112   
-1184  -64    
144    -96    
-48    64     
-16    -32    
112    192    
144    192    
-64    96     
64     -1216  
96     144    
96     16     
144    48     
-80    16     
-80    0      
64     208    
0      -224   
80     -64    
-80    -112   
-144   32     
176    -32    
80     -32    
0      -176   
-32    -80    
176    -608   
288    144    
-160   0      
-96    -48    
-288   -352   
160    -240   
-144   -176   
0      48     
144    64     
-32    -112   
-160   240    
160    48     
-144   -96    
96     -272   
-48    0      
192    -112   
48     112    
0      32     
-128   -304   
304    16     
176    64     
-192   -16    
-16    -144   
144    176    
-16    64     
-112   -16    
64     -48    
0      96     
32     -32    
0      176    
352    -80    
-112   16     
-64    176    
176    688    
32     112    
176    160    
48     96     
32     -240   
80     -64    
32     -32    
144    96     
-160   -128   
176    112    
-128   -32    
160    208    
-656   -224   
-96    -128   
48     96     
-160   -144   
128    -48    
32     -32    
-144   -80    
32     -64    
-160   144    
192    -32    
-192   32     
-576   -64    
32     96     
-1184  -240   
0      -16    
-272   -272   
16     16     
64     48     
-416   32     
-48    -32    
-1120  48     
80     96     
32     64     
-32    0      
32     16     
-48    -32    
-80    -64    
32     160    
-320   32     
304    144    
-128   112    
-80    32     
-32    0      
-336   -256   
-16    112    
-368   64     
-208   0      
-160   -32    
112    32     
-48    -48    
-128   16     
-16    -208   
-96    16     
144    -64    
64     96     
16     96     
-208   -80    
16     -128   
-96    -16    
-16    48     
-240   32     
-112   16     
-672   -224   
-32    -48    
-224   -112   
0      32     
48     -16    
16     96     
-208   -96    
96     0      
144    224    
-96    192    
-160   80     
144    160    
-128   80     
96     48     
-112   32     
-96    32     
64     128    
-528   -16    
112    128    
-80    -32    
48     128    
-160   80     
80     128    
-48    0      
-464   -848   
496    208    
-64    1200   
-288   -656   
80     -144   
-16    416    
32     -192   
-32    96     
-32    32     
-48    96     
48     -64    
96     144    
32     16     
-80    64     
0      96     
-48    64     
-288   -400   
224    864    
-288   0      
32     -176   
-160   544    
16     -224   
-64    64     
-496   -176   
64     96     
-1456  -48    
144    224    
-64    176    
0      -272   
192    128    
-400   -208   
512    -144   
-224   752    
64     0      
0      -240   
-16    96     
-32    176    
-32    80     
16     -48    
0      16     
-32    352    
-96    160    
16     -464   
-64    -80    
-16    -112   
16     -48    
144    176    
112    64     
48     512    
-112   -48    
-16    48     
-112   -64    
-192   -208   
-256   -336   
112    -64    
-288   16     
-80    80     
32     112    
-16    -32    
192    112    
-224   144    
224    128    
64     80     
32     -32    
-192   0      
128    64     
-144   64     
64     80     
288    496    
-176   640    
-16    368    
128    64     
80     288    
128    80     
32     80     
-64    -160   
-16    -224   
-176   -208   
-80    -144   
480    192    
-32    528    
32     272    
192    208    
-304   -80    
192    80     
-64    -144   
384    -32    
-96    -80    
-128   -128   
192    -48    
-64    192    
368    192    
160    64     
288    544    
-208   192    
-176   -48    
336    -160   
-96    112    
-64    -176   
128    -112   
240    368    
128    416    
-80    112    
64     16     
-16    48     
144    0      
-96    32     
0      -96    
288    288    
-144   -32    
112    352    
-256   -64    
0      48     
0      80     
32     144    
-144   144    
-208   -352   
304    -112   
304    544    
256    864    
-320   -48    
320    384    
-16    64     
0      48     
-64    -128   
112    -96    
-288   528    
336    -224   
-192   96     
-16    -272   
-224   -224   
0      -560   
80     224    
-16    368    
128    160    
96     -304   
-96    -352   
112    -128   
32     240    
336    336    
96     672    
32     432    
48     240    
208    464    
16     96     
-128   -64    
-32    192    
160    144    
-96    96     
-144   64     
176    -48    
16     -48    
-16    0      
-112   96     
256    -80    
-128   112    
-16    0      
-96    -480   
128    128    
-96    -816   
416    352    
-224   288    
80     160    
288    144    
-16    288    
-208   16     
0      96     
176    -16    
64     -112   
-64    -320   
304    80     
-160   64     
16     -80    
0      32     
80     304    
400    240    
-320   80     
128    304    
80     368    
-272   240    
-32    64     
48     112    
16     -112   
176    112    
-64    -48    
128    48     
-32    -32    
0      -144   
144    80     
-192   -240   
144    128    
-128   -112   
208    160    
-96    16     
112    144    
48     -16    
48     160    
-48    -160   
-16    96     
256    -48    
-352   -112   
176    144    
-80    -192   
16     80     
112    -304   
-48    -80    
208    -416   
-32    240    
32     -432   
112    -128   
-16    336    
112    48     
-192   32     
160    32     
-32    -16    
96     -64    
-48    -32    
240    -48    
-16    96     
48     -80    
176    112    
-64    -352   
-16    64     
16     -960   
80     96     
-96    -16    
96     128    
-48    32     
112    -16    
48     -48    
-48    -112   
160    144    
48     16     
-16    80     
16     -448   
240    272    
32     -928   
-16    176    
80     -352   
48     64     
80     0      
96     96     
80     96     
-64    -32    
112    64     
64     0      
160    240    
208    -160   
-96    48     
384    -48    
16     208    
128    -16    
208    64     
32     -64    
80     -16    
16     32     
48     16     
176    336    
64     304    
-64    224    
256    -288   
-32    16     
144    -208   
-112   96     
192    80     
-80    160    
112    -32    
112    144    
32     -320   
48     -192   
32     64     
176    -800   
112    80     
-336   -16    
16     -768   
16     -48    
64     -2464  
-48    -336   
32     96     
32     0      
48     128    
-16    -128   
48     208    
0      -480   
-32    -624   
176    144    
-16    -112   
160    -48    
-1424  0      
160    16     
32     0      
160    -368   
-48    -96    
336    128    
-160   416    
-112   96     
80     -304   
176    -576   
-96    -112   
-16    64     
80     80     
-64    0      
64     -48    
-992   -32    
-64    -80    
112    160    
-144   -272   
48     64     
176    -528   
-80    -48    
160    -2288  
-16    -112   
-16    -240   
304    -16    
48     160    
80     96     
-192   -160   
160    128    
-688   -176   
0      -32    
-32    80     
32     16     
0      -48    
144    -48    
-32    -144   
80     -1248  
160    -128   
-16    -80    
208    144    
-16    -96    
64     32     
-112   -16    
-32    48     
48     -32    
96     32     
-304   32     
-16    -208   
320    -16    
-224   48     
64     64     
-144   -512   
240    -96    
192    -592   
-128   -96    
16     -272   
96     -32    
-32    -48    
64     16     
80     192    
-64    -16    
-192   -192   
128    64     
-144   48     
224    176    
96     48     
-48    -112   
176    144    
48     -1040  
48     96     
48     48     
16     -48    
-16    -112   
-144   -240   
-176   -224   
-80    -160   
-160   384    
80     0      
-272   192    
-16    -48    
32     -96    
64     -272   
176    176    
-48    96     
16     80     
64     64     
176    80     
-352   -144   
160    96     
-208   -32    
48     688    
-96    -416   
-48    80     
-256   160    
-128   -80    
32     -256   
16     -224   
272    304    
-32    -320   
176    160    
-176   16     
128    -16    
-336   -16    
192    80     
-48    -16    
160    336    
-176   112    
-144   288    
-112   -336   
48     -576   
32     96     
160    192    
64     32     
-144   -256   
288    0      
-112   -64    
48     0      
-96    48     
48     48     
-80    0      
48     -16    
-128   -48    
-16    -96    
-112   80     
176    32     
-32    16     
-640   -80    
208    -32    
-688   -224   
-448   -32    
-96    16     
-192   192    
336    384    
-592   272    
-64    -176   
240    0      
-416   64     
160    -240   
-192   -160   
48     32     
48     208    
-352   0      
0      48     
96     48     
-272   128    
80     80     
-288   112    
16     176    
-96    0      
-128   144    
-48    48     
-16    16     
112    32     
-320   -336   
-16    -112   
112    352    
320    704    
-368   176    
176    -128   
208    192    
48     288    
32     -112   
-80    48     
-64    -16    
-176   -48    
-96    16     
-112   272    
-768   -32    
-208   80     
-224   -176   
144    -32    
-144   -16    
176    48     
-64    128    
-128   -176   
-144   -624   
-112   -528   
256    128    
-192   32     
-112   16     
-208   -112   
-96    -64    
-880   -128   
0      -16    
-32    48     
368    240    
-16    560    
-80    272    
-112   -496   
-128   -192   
16     176    
224    592    
-176   304    
-352   -432   
96     -160   
32     224    
-400   -64    
224    -320   
-304   288    
224    -16    
-160   112    
80     -128   
224    96     
-304   -528   
80     368    
-32    112    
-96    32     
368    688    
-752   -896   
-64    -352   
-80    176    
-272   -128   
32     -144   
-16    464    
-48    -64    
-144   -80    
-64    -240   
-32    -208   
0      -16    
160    64     
112    160    
32     208    
160    192    
-80    -64    
-32    80     
-16    -336   
-144   -240   
-208   -256   
16     -16    
-1184  -112   
-96    -96    
144    -80    
-112   -192   
384    32     
0      80     
112    96     
0      112    
16     240    
32     96     
80     64     
-48    32     
-80    -96    
-368   -80    
176    128    
-560   -96    
-112   -192   
448    160    
-64    160    
-48    -96    
-144   -32    
224    128    
-16    128    
-64    144    
-32    -64    
-32    -64    
-224   -208   
32     -240   
96     176    
0      64     
-80    16     
144    128    
192    80     
-272   144    
48     48     
-48    16     
176    96     
-80    80     
48     80     
-32    64     
-80    -48    
0      0      
144    224    
-368   -64    
176    144    
112    192    
-256   -192   
224    112    
48     144    
96     -16    
32     112    
160    128    
-176   -32    
240    -48    
-160   -112   
64     128    
-128   176    
64     64     
-176   -64    
-64    16     
96     144    
-240   0      
80     128    
128    128    
-192   144    
64     16     
-48    80     
-16    16     
128    112    
-80    64     
48     80     
-160   16     
160    96     
-288   -144   
64     -64    
16     64     
16     -80    
176    128    
16     96     
48     0      
64     48     
96     112    
80     96     
80     112    
-320   -208   
448    -64    
-352   64     
352    64     
-112   0      
160    112    
64     128    
-128   -80    
192    192    
128    64     
32     128    
64     64     
16     96     
224    16     
-144   112    
32     32     
-64    64     
32     0      
176    96     
-16    192    
80     -16    
320    400    
-256   96     
16     192    
96     16     
32     144    
-32    0      
16     80     
-16    -224   
64     32     
-16    0      
-80    0      
112    128    
64     -32    
-64    144    
288    144    
-128   192    
32     96     
32     160    
352    128    
-304   224    
80     -304   
-80    -112   
96     112    
192    160    
-128   -160   
192    128    
-64    0      
-32    16     
144    336    
-32    160    
240    48     
-160   96     
336    192    
-16    48     
32     80     
16     -96    
-16    112    
112    48     
64     32     
112    32     
-112   160    
16     -48    
0      -144   
-32    32     
-80    -304   
144    0      
-48    80     
128    208    
-48    144    
240    0      
-64    -176   
80     208    
176    80     
-112   32     
64     -48    
128    144    
48     0      
64     -96    
0      32     
160    -400   
32     112    
16     -336   
-48    48     
112    32     
32     80     
112    -16    
-112   -16    
48     -64    
112    176    
-32    48     
-80    -32    
48     64     
32     0      
96     112    
-64    -336   
48     32     
96     144    
64     32     
208    80     
16     144    
496    352    
-176   784    
-240   176    
160    -80    
96     48     
336    256    
-336   224    
-80    -336   
-80    -96    
384    -224   
-48    144    
32     -240   
96     64     
240    352    
304    288    
-304   -224   
80     -112   
64     128    
160    128    
192    224    
112    224    
-16    144    
-48    -512   
96     16     
96     -80    
-16    192    
48     -576   
-64    64     
208    16     
144    176    
32     -576   
-224   -192   
272    -128   
-176   64     
16     64     
-16    -704   
144    -64    
48     -448   
240    0      
-224   -240   
80     160    
-272   -352   
96     464    
160    464    
-48    96     
0      64     
-64    144    
32     -32    
96     0      
-32    64     
224    64     
48     128    
16     0      
0      -208   
-96    -416   
192    320    
224    -112   
-144   -144   
240    656    
32     432    
-64    -304   
-112   -800   
-112   32     
-1264  -64    
368    16     
-240   -160   
240    -176   
-224   16     
208    -640   
0      -240   
-80    384    
-16    -48    
-32    -336   
128    192    
64     -784   
176    208    
80     576    
16     32     
-208   -64    
48     64     
0      -144   
48     -496   
64     -128   
80     -608   
-96    80     
176    -96    
-16    0      
128    32     
-96    -208   
48     -96    
368    224    
-160   304    
0      -208   
208    -112   
-160   -112   
112    -176   
96     -176   
96     -32    
-32    -160   
-48    32     
192    -816   
-64    -80    
64     -128   
-112   80     
80     0      
272    0      
-496   -368   
128    -304   
32     -32    
-48    -64    
-416   80     
144    -112   
0      -112   
176    -432   
-32    -160   
176    -464   
-112   320    
80     32     
-128   -96    
-96    368    
208    208    
-272   -144   
192    -224   
16     -32    
-112   16     
80     32     
80     -128   
32     -160   
192    -80    
16     176    
176    -224   
112    -16    
112    -1536  
-96    112    
176    16     
-96    -16    
192    176    
-64    288    
-336   -320   
144    -1232  
-80    -704   
304    -176   
-2592  -16    
96     64     
144    80     
112    -64    
64     224    
-32    -832   
-16    192    
192    352    
-80    -64    
-16    -48    
112    304    
-240   -16    
128    -16    
32     -16    
32     -64    
-144   -368   
192    304    
-128   256    
-240   -1024  
400    80     
16     96     
-64    -304   
144    176    
112    16     
-192   -576   
288    -208   
160    816    
64     -128   
0      112    
240    -16    
-240   -64    
-64    -416   
144    -112   
48     -160   
48     96     
-16    -432   
-96    80     
-208   -32    
160    80     
-96    128    
0      32     
0      128    
96     352    
-64    416    
-64    32     
-256   -176   
-16    -64    
416    528    
-512   -96    
112    176    
-112   -208   
96     -96    
-144   -80    
112    48     
-96    -80    
224    224    
160    -432   
-336   -432   
160    -160   
-96    16     
-272   -16    
-160   -16    
192    192    
-256   64     
-96    224    
-192   416    
-912   -32    
208    16     
-976   -16    
192    48     
-1184  32     
-80    -16    
64     -80    
160    32     
-480   16     
416    16     
-368   128    
192    0      
-240   -256   
208    80     
64     112    
-304   -48    
-48    80     
16     16     
-432   32     
-16    -112   
-192   192    
192    -144   
-304   -96    
272    0      
48     112    
-352   -176   
-112   -160   
-32    -432   
64     240    
-16    64     
80     144    
-224   -112   
-224   64     
304    160    
-192   16     
192    112    
-256   256    
0      144    
-304   -64    
272    160    
0      -96    
0      128    
-112   -48    
-112   -48    
16     32     
-16    0      
16     64     
-256   -32    
144    -16    
-16    -64    
208    48     
-16    80     
192    128    
-688   -32    
160    176    
-112   16     
0      144    
192    32     
-160   96     
-96    16     
-16    -16    
-96    -32    
-128   64     
48     96     
-192   0      
-32    64     
-352   -144   
-32    48     
-480   0      
64     80     
-80    -64    
160    80     
112    0      
-80    48     
0      16     
-64    128    
-48    64     
-80    -32    
0      128    
0      144    
128    32     
-192   32     
128    96     
-16    64     
112    96     
-80    -48    
-64    16     
-112   96     
-240   -336   
208    -64    
0      32     
-16    160    
64     -48    
-48    -32    
-64    208    
352    352    
-496   48     
240    240    
-112   -64    
-192   -16    
-1376  -32    
80     48     
-64    -64    
32     -32    
64     96     
48     -80    
-208   0      
80     -112   
-160   0      
144    0      
-16    160    
0      0      
48     48     
-96    -112   
128    144    
-112   256    
16     112    
16     48     
16     112    
80     208    
-160   80     
-48    80     
32     64     
-48    0      
32     96     
48     0      
-112   32     
-48    80     
-240   -480   
304    32     
16     96     
-272   80     
176    64     
-144   16     
192    144    
-80    112    
96     128    
80     96     
112    128    
-192   -32    
-32    112    
96     32     
-96    80     
0      -112   
224    80     
-128   80     
240    64     
-320   -80    
112    192    
-64    144    
-16    64     
128    64     
-96    -160   
-96    80     
64     128    
-256   96     
-32    16     
240    336    
160    240    
-192   96     
-80    0      
208    32     
64     16     
80     128    
64     128    
-16    48     
-64    32     
160    48     
-112   64     
224    176    
-192   192    
-128   -272   
-32    320    
16     -16    
-64    -224   
0      16     
0      48     
176    208    
-16    320    
-48    80     
0      32     
64     112    
48     0      
-32    32     
-112   16     
96     16     
-96    -48    
-16    -16    
-80    -368   
-496   -960   
176    -432   
0      32     
-16    -64    
-144   -48    
48     -16    
64     192    
-176   -448   
16     -640   
32     -224   
-224   -656   
-224   -592   
144    -368   
0      -752   
-144   48     
176    208    
64     352    
96     128    
112    192    
-224   -144   
176    80     
64     160    
-48    64     
-160   0      
352    320    
-352   -16    
240    208    
224    288    
176    64     
-304   -368   
160    288    
-96    176    
-32    -96    
32     -144   
160    336    
-208   -48    
0      -576   
272    -48    
-208   448    
32     -192   
-112   -208   
160    256    
-272   -48    
64     -288   
128    64     
-112   0      
-16    48     
416    -112   
-80    304    
-224   144    
192    -64    
-16    64     
144    176    
96     0      
80     96     
-208   112    
320    48     
32     96     
-208   -496   
176    112    
16     16     
-48    64     
192    96     
96     160    
-112   80     
-80    80     
-64    -144   
96     -288   
192    288    
112    512    
-16    240    
80     -160   
80     -208   
-32    0      
-272   -624   
112    -544   
304    304    
16     112    
144    832    
-144   112    
192    160    
16     432    
144    624    
-160   -272   
112    0      
-176   -256   
-64    -352   
-48    -304   
-32    -320   
176    32     
-32    -416   
192    -48    
-368   -1072  
400    160    
-128   -160   
80     112    
0      -48    
80     160    
32     -32    
48     112    
64     80     
80     16     
96     96     
-80    -144   
96     160    
64     -336   
32     160    
64     0      
32     -560   
32     -624   
48     224    
80     160    
256    416    
-16    400    
64     144    
32     -160   
-192   -400   
448    192    
-288   -272   
288    -16    
-112   48     
112    96     
32     -176   
32     -80    
384    -496   
-16    368    
48     32     
160    448    
-48    -80    
272    384    
-192   224    
272    -304   
-144   96     
-48    -224   
256    160    
-240   -160   
480    928    
160    560    
-432   -608   
144    -144   
32     304    
-112   -192   
240    -1984  
-32    48     
-16    96     
144    -608   
288    496    
-256   -160   
-80    -112   
272    240    
16     -80    
144    80     
32     16     
208    384    
0      0      
64     -1248  
-16    -48    
112    -1088  
384    80     
-576   0      
80     16     
48     160    
128    -64    
-208   -96    
160    -2576  
80     -16    
-160   144    
-112   48     
96     -80    
16     96     
16     -80    
16     -48    
208    -144   
160    16     
-672   -32    
32     32     
224    -128   
-368   -464   
128    -432   
0      -320   
176    96     
48     144    
0      -48    
0      -96    
80     208    
-80    64     
-64    -128   
96     -96    
176    320    
-432   -96    
0      -224   
112    -256   
112    48     
80     32     
48     -208   
0      -64    
80     -784   
-176   272    
144    -176   
112    160    
112    -16    
-16    32     
-16    128    
176    -112   
-48    -80    
48     -32    
-208   144    
-176   64     
192    128    
80     -176   
48     -32    
112    -208   
-64    48     
16     0      
-96    128    
160    48     
240    -48    
-272   -160   
64     -160   
-64    112    
-80    -160   
-128   -48    
208    -112   
96     48     
128    -224   
-384   0      
16     -960   
320    -400   
240    -1760  
48     -144   
208    -80    
-48    -48    
80     96     
-32    80     
32     160    
80     48     
-576   -80    
-32    -272   
-1904  -48    
80     48     
-240   96     
-16    48     
48     240    
160    -496   
-160   0      
-48    -16    
-48    -256   
48     -16    
96     -32    
-80    96     
208    -48    
-272   -80    
272    -160   
176    112    
16     -80    
144    0      
48     -320   
80     144    
208    -672   
48     96     
-208   16     
-32    96     
-144   128    
-256   16     
-208   -48    
48     48     
-208   16     
16     -16    
-144   0      
96     -112   
-48    -32    
192    -176   
48     -96    
80     16     
-112   128    
-176   64     
304    208    
48     -80    
-240   64     
48     16     
144    0      
-176   64     
80     144    
128    32     
-240   -144   
64     -64    
208    -48    
112    96     
-1008  -64    
-368   -32    
-112   80     
-736   16     
144    144    
112    80     
80     208    
-80    0      
-32    -96    
144    -96    
0      48     
-208   -48    
-16    48     
80     -16    
-32    240    
208    64     
-560   -176   
80     112    
-32    32     
-192   -96    
-368   48     
-16    -16    
-16    -32    
32     80     
32     176    
-64    112    
-32    -96    
32     -48    
0      -368   
32     112    
-144   0      
-16    48     
0      32     
-16    80     
0      80     
32     80     
-144   -64    
112    -64    
-16    0      
-192   80     
-32    32     
-96    16     
32     112    
0      -16    
-240   -32    
-16    160    
32     -16    
0      -64    
-64    -96    
-112   -16    
-224   -64    
0      48     
-128   16     
-112   64     
-96    16     
-112   80     
112    -16    
96     32     
-224   -128   
208    -112   
256    320    
-288   -368   
80     -16    
-112   240    
160    352    
-208   256    
112    192    
-224   96     
-80    -96    
-576   -112   
48     -48    
0      -16    
-64    256    
192    464    
-176   16     
272    336    
-224   336    
-128   -304   
96     224    
-48    192    
48     16     
-16    16     
-64    -32    
64     -16    
-64    0      
16     128    
64     0      
32     48     
-16    608    
80     -464   
-208   -112   
64     288    
16     -208   
-32    352    
-160   -144   
208    448    
-80    64     
-352   -176   
208    192    
-112   96     
80     80     
-560   -64    
128    176    
16     112    
-176   -192   
80     208    
-16    208    
-32    208    
-192   -80    
-96    -112   
-112   -128   
-32    -320   
352    384    
-144   160    
192    -224   
48     -224   
-912   -368   
-48    192    
112    224    
112    32     
-192   192    
64     -112   
32     160    
432    208    
-112   256    
0      112    
-176   -320   
448    80     
80     240    
-240   -48    
0      512    
144    288    
-176   736    
224    0      
-464   16     
32     -560   
-224   80     
-272   624    
-32    -592   
-16    272    
-192   240    
-64    -208   
-128   128    
-336   -80    
-128   -208   
224    816    
-304   -96    
-80    -688   
240    320    
-256   160    
0      -80    
-208   96     
768    592    
-528   272    
-48    -768   
160    -16    
-144   688    
-112   -480   
-240   -256   
320    256    
-128   672    
80     224    
128    32     
-144   96     
112    48     
240    224    
-368   -64    
48     128    
80     80     
-128   32     
-48    -112   
-48    0      
48     96     
112    352    
0      304    
-64    -144   
16     -528   
192    400    
64     288    
0      -32    
96     320    
64     208    
32     112    
-80    -288   
-48    592    
-160   304    
-160   -912   
304    -16    
0      176    
-16    288    
16     -64    
-96    208    
176    -240   
304    576    
-96    528    
-80    208    
-16    -1136  
-64    -832   
160    544    
288    624    
-144   144    
0      96     
-112   48     
224    128    
-32    0      
96     16     
80     128    
96     128    
0      48     
16     32     
32     48     
400    320    
-464   112    
112    224    
48     -64    
224    96     
-48    176    
48     0      
-32    -272   
160    128    
-48    -16    
128    48     
144    416    
-208   80     
144    -32    
32     -96    
-160   -160   
208    352    
-208   112    
64     96     
-160   96     
-80    176    
80     16     
96     -320   
-16    -128   
-32    128    
48     -224   
208    32     
-16    240    
208    272    
-16    384    
48     112    
-112   -272   
-96    -208   
224    -336   
-128   -304   
160    -96    
-112   144    
320    -112   
-112   0      
80     -512   
0      -96    
80     0      
64     32     
-256   -224   
352    -288   
-112   48     
224    32     
-48    -32    
48     144    
48     32     
0      80     
112    96     
-192   -96    
176    64     
-16    -208   
-96    48     
112    128    
-16    96     
32     112    
48     192    
16     112    
96     32     
0      16     
272    80     
64     320    
-256   -128   
128    32     
-48    32     
208    48     
-144   -64    
144    240    
-96    160    
16     48     
-48    -160   
-224   -48    
400    64     
-96    160    
0      -96    
112    176    
-48    112    
128    48     
-96    -16    
272    -16    
128    48     
80     -544   
112    80     
64     -256   
128    160    
144    48     
32     80     
48     32     
32     48     
-96    -80    
80     80     
496    400    
-512   320    
208    400    
-208   -128   
-160   144    
-176   -624   
0      -16    
80     112    
128    112    
32     -112   
48     112    
-48    -16    
208    128    
160    -16    
32     -304   
80     48     
-48    -480   
96     64     
-96    -96    
64     176    
-32    -96    
176    112    
144    96     
-128   128    
48     48     
-64    0      
144    128    
352    192    
-192   -48    
352    128    
128    16     
224    32     
-64    -32    
128    -32    
192    144    
32     32     
80     192    
48     -16    
32     16     
32     -96    
240    -16    
32     48     
-80    -256   
112    16     
-16    -160   
448    -1616  
-336   16     
80     -48    
128    -48    
272    48     
-256   32     
208    96     
-144   -32    
224    160    
-96    48     
16     112    
112    48     
0      -176   
176    176    
-736   0      
176    -512   
16     0      
144    -256   
-32    -144   
128    -448   
208    -48    
-256   0      
208    -32    
-128   -48    
-80    64     
80     -176   
-32    32     
160    -160   
-16    64     
-256   0      
96     -112   
-80    -160   
336    16     
-64    -336   
128    -672   
96     208    
352    64     
-128   -96    
96     -208   
64     48     
112    -288   
80     128    
16     64     
48     -32    
-64    -208   
-48    -336   
96     64     
48     -208   
16     64     
32     -48    
80     112    
80     -352   
448    224    
-64    352    
112    128    
-16    -48    
208    -48    
-16    16     
-48    -80    
-304   -192   
32     32     
-848   80     
-64    -192   
80     -16    
160    80     
-48    48     
16     -144   
-48    -16    
96     -240   
-64    -112   
192    -144   
-16    -208   
-176   -112   
80     -48    
-16    80     
48     224    
16     192    
-192   256    
-496   112    
208    -144   
96     32     
112    -176   
144    192    
16     -32    
112    112    
-144   80     
80     -48    
-16    64     
48     -48    
0      192    
48     48     
0      80     
-48    -160   
160    240    
160    496    
-240   176    
0      -224   
48     32     
128    -1344  
-16    192    
32     -96    
-80    -272   
-128   -128   
80     240    
240    416    
-320   -416   
16     32     
0      -16    
-128   352    
272    0      
-112   0      
80     -560   
-160   496    
128    -912   
-32    416    
-64    112    
176    32     
-32    -16    
64     0      
-144   32     
-16    -224   
-96    96     
176    464    
-256   -384   
112    -128   
64     96     
144    -32    
-32    272    
48     176    
160    208    
-128   192    
160    -320   
-544   -352   
-128   -512   
144    48     
-80    304    
16     -64    
144    32     
-720   -208   
672    -480   
-32    688    
-336   -160   
0      -352   
-112   -192   
-160   144    
-192   64     
-864   64     
-112   96     
-64    592    
48     32     
208    48     
0      16     
-48    192    
-176   256    
-624   -496   
-160   128    
128    -96    
0      224    
-256   48     
-112   -128   
-384   -144   
48     -336   
-240   0      
-112   -48    
32     176    
-384   96     
48     336    
0      -224   
160    0      
-96    -64    
80     128    
-96    -16    
640    448    
-624   144    
-224   -704   
144    48     
80     496    
-64    16     
-688   144    
192    96     
-1360  -64    
64     -32    
-272   448    
0      32     
128    -416   
-80    208    
160    -688   
-160   -144   
192    -528   
80     144    
176    288    
-176   656    
-176   -304   
-304   -576   
64     432    
-512   -112   
-272   -208   
352    0      
-128   -16    
-16    -448   
-80    -368   
64     240    
-352   -848   
464    -368   
-32    816    
48     -96    
64     112    
16     864    
-32    176    
-16    -192   
-112   -368   
-112   224    
-496   48     
0      192    
256    -16    
-160   -16    
208    64     
-288   176    
64     -192   
-176   368    
176    -208   
-112   240    
16     64     
32     -416   
64     0      
-208   -80    
-128   -144   
48     -240   
96     160    
-128   -80    
352    400    
-192   -160   
112    64     
-128   192    
80     -16    
48     80     
64     -16    
-112   64     
-48    -192   
-16    -480   
-144   144    
-144   320    
-48    -368   
0      144    
-720   16     
-336   -304   
-96    -160   
128    -32    
-32    128    
192    128    
-16    80     
80     16     
0      48     
96     144    
-176   80     
-32    32     
144    -160   
-336   -48    
288    64     
-144   192    
16     160    
80     336    
-48    368    
-64    288    
64     128    
-96    -80    
128    0      
0      -64    
48     96     
-16    240    
-352   -160   
288    -192   
-192   -48    
80     32     
-96    0      
176    112    
-80    128    
-48    96     
0      48     
-64    -16    
16     64     
-48    -32    
16     -16    
16     -32    
16     80     
-48    -128   
16     160    
-192   -16    
48     16     
0      64     
64     80     
128    272    
-240   0      
128    112    
128    96     
0      64     
16     -16    
32     64     
-32    -48    
-224   128    
16     -16    
-80    272    
48     80     
-64    16     
32     160    
64     112    
96     96     
16     32     
16     -176   
304    -144   
112    128    
144    80     
16     96     
-80    32     
96     160    
16     0      
160    80     
16     48     
-48    48     
128    16     
-144   -80    
-224   64     
224    0      
112    256    
-240   48     
32     64     
48     96     
64     -16    
-160   -16    
96     0      
-112   0      
64     176    
96     208    
-144   256    
-144   128    
-16    48     
-128   -240   
-256   -208   
336    400    
-224   16     
144    -16    
-96    -112   
272    -48    
48     32     
-32    112    
-16    -128   
-80    -896   
192    160    
-64    256    
0      0      
-32    16     
320    160    
240    288    
-32    256    
64     176    
192    112    
176    240    
224    240    
96     80     
240    224    
0      48     
-208   -1328  
176    -176   
336    -96    
-32    -128   
240    16     
64     16     
112    -256   
0      -352   
-112   -288   
16     -304   
-208   -144   
112    -112   
-288   -336   
-16    48     
160    96     
-112   -464   
-80    -80    
304    0      
96     96     
32     -80    
-256   32     
336    144    
16     128    
112    192    
96     128    
-256   -192   
64     0      
32     32     
176    176    
64     -32    
-400   -320   
192    0      
-48    -640   
-64    64     
-128   112    
0      224    
48     48     
-128   -16    
-64    -464   
384    16     
-112   112    
208    96     
-80    -16    
192    -48    
48     96     
32     -256   
80     144    
80     -288   
-16    192    
144    496    
96     16     
-48    112    
176    208    
-112   48     
144    80     
0      0      
112    144    
-176   -96    
32     -240   
128    80     
192    64     
-16    160    
-32    -160   
32     96     
48     -464   
224    112    
16     -64    
-80    80     
48     64     
256    176    
-48    80     
-128   144    
64     96     
64     0      
0      96     
112    32     
112    272    
-32    -528   
16     64     
64     -768   
144    224    
-176   -224   
272    -144   
-160   160    
368    144    
-80    64     
0      96     
64     112    
336    -48    
0      112    
80     -224   
16     96     
16     -304   
-96    -272   
-16    -480   
192    96     
400    64     
-240   -496   
128    -160   
0      288    
64     208    
-16    -16    
128    -176   
32     -144   
0      -32    
32     -544   
128    256    
-64    -192   
96     80     
192    80     
-16    368    
112    -832   
160    128    
-144   80     
208    80     
16     96     
16     80     
16     -2720  
160    320    
-32    0      
16     -80    
192    128    
160    0      
-144   64     
208    -240   
32     -16    
32     128    
-192   -1008  
-32    -816   
256    96     
48     240    
96     80     
-48    -800   
128    -16    
112    -64    
48     -96    
48     256    
288    -48    
32     432    
-16    -336   
16     -272   
80     32     
48     -32    
16     128    
48     -96    
-128   -224   
-80    -288   
288    224    
160    160    
96     -160   
16     -32    
192    -304   
16     -80    
-304   -480   
-16    -224   
160    -80    
256    512    
208    496    
-128   736    
208    -176   
96     -192   
-384   -64    
-176   -240   
144    -192   
-80    -240   
224    32     
-128   -560   
224    288    
240    -144   
320    400    
-96    192    
-368   -160   
64     -80    
416    496    
-416   144    
-16    352    
-240   16     
0      -288   
112    64     
352    368    
96     416    
496    528    
-304   176    
288    -416   
-480   -80    
64     -464   
160    32     
16     384    
96     336    
-112   64     
-32    128    
-96    336    
-208   240    
-496   -176   
-192   -544   
320    32     
-16    80     
-48    16     
304    -160   
-160   400    
32     -400   
80     48     
32     -48    
544    160    
-224   256    
304    -240   
-304   256    
80     -1024  
-208   512    
256    -32    
-736   160    
-16    -336   
176    -48    
-64    -288   
112    -480   
224    -288   
-96    -96    
-64    256    
96     -208   
32     -80    
-80    -96    
144    176    
0      32     
64     240    
-256   -480   
-496   -128   
-32    528    
64     -336   
80     -80    
-128   -16    
176    -240   
-16    96     
-48    48     
160    336    
-80    -208   
16     -64    
-160   16     
160    208    
32     -16    
-144   -144   
128    112    
-48    -96    
-64    240    
-32    -256   
-160   32     
144    -288   
-16    -80    
-64    -128   
0      -64    
80     0      
16     -16    
48     192    
-48    320    
-224   304    
272    336    
64     336    
-48    96     
-32    160    
-464   -816   
-48    32     
-384   -176   
-336   128    
160    80     
-208   -112   
-224   16     
304    240    
-144   112    
16     144    
224    192    
-144   -48    
-112   80     
-1328  -288   
48     96     
16     0      
-96    -96    
32     0      
-256   496    
112    176    
-480   -16    
-32    -80    
-544   -64    
0      -64    
0      48     
-32    -16    
-64    -208   
-64    -32    
80     32     
128    96     
-176   -48    
-112   48     
-112   64     
-128   -208   
-96    32     
-48    -48    
-112   80     
-160   -96    
80     -16    
-1104  -96    
-272   32     
-32    -112   
64     112    
-160   -32    
64     64     
-112   -400   
-32    -80    
-96    64     
-112   -224   
-160   96     
96     112    
-96    112    
16     112    
-272   -16    
-816   -16    
-48    0      
-64    32     
144    80     
-48    -16    
112    128    
-48    -208   
-32    -48    
-48    -80    
32     64     
16     96     
-80    32     
-16    80     
-16    96     
176    112    
-320   48     
160    48     
-368   0      
160    80     
-112   -64    
128    48     
-80    0      
-32    -32    
128    128    
-112   80     
64     128    
0      32     
-80    32     
0      112    
-64    464    
80     400    
16     -64    
-560   -672   
128    -144   
64     320    
224    496    
160    384    
-192   32     
64     80     
-96    -32    
-32    64     
-48    96     
160    0      
-144   96     
256    80     
-368   -224   
48     96     
-816   -176   
16     80     
-16    -96    
32     80     
16     80     
-192   -80    
128    32     
-144   -32    
32     128    
0      112    
-144   -112   
-16    -96    
-16    -192   
-176   -272   
0      16     
112    112    
304    416    
-976   32     
192    -80    
-176   176    
-176   0      
-64    -16    
-32    96     
112    32     
-96    48     
48     16     
-240   64     
512    464    
-240   80     
160    -64    
-32    80     
112    144    
-96    176    
-128   112    
32     80     
48     96     
-32    96     
-48    -112   
-112   64     
48     16     
-176   -16    
-80    16     
144    32     
-240   160    
48     240    
-416   -128   
336    400    
64     -48    
-96    16     
224    128    
48     0      
-80    -64    
32     144    
-96    -80    
160    96     
16     0      
-224   -96    
-32    144    
-208   -48    
128    160    
-304   -16    
96     64     
64     144    
80     112    
-64    80     
96     16     
64     160    
32     96     
16     96     
-64    96     
0      96     
-128   -16    
336    192    
-128   -16    
16     112    
-144   16     
64     64     
16     48     
80     48     
-112   32     
96     144    
-144   112    
144    144    
160    96     
-48    0      
64     32     
-16    0      
-48    -64    
-80    96     
176    448    
0      176    
-192   256    
112    304    
16     144    
-64    112    
48     160    
80     -64    
64     112    
-64    128    
80     64     
-112   16     
64     160    
112    224    
-320   -256   
176    -448   
-160   -16    
192    -272   
48     336    
112    544    
-48    -144   
16     160    
48     0      
-144   -432   
96     624    
240    288    
-16    80     
-208   -224   
240    48     
-304   272    
144    -2352  
32     144    
160    144    
-32    64     
288    176    
-160   16     
-80    80     
192    112    
-96    48     
80     64     
-16    64     
64     96     
0      208    
112    -368   
-128   192    
-176   16     
176    -576   
-96    368    
208    32     
48     96     
-32    192    
448    224    
-352   80     
224    64     
-96    48     
-144   -48    
224    32     
-176   -112   
160    -96    
0      128    
0      -256   
48     160    
-16    -304   
16     -128   
-80    64     
160    96     
80     144    
96     256    
176    16     
32     128    
-48    32     
-224   -384   
176    -112   
16     208    
-80    160    
-160   -672   
-144   -224   
-48    -1824  
64     -144   
-16    -176   
112    80     
144    256    
-64    112    
96     -320   
-16    128    
208    80     
-32    80     
208    176    
-192   -96    
16     112    
0      -192   
128    16     
-96    -336   
240    112    
-160   -1280  
144    256    
-208   -320   
-16    -288   
-128   -48    
144    -80    
-160   -16    
-64    16     
32     -176   
0      -112   
784    704    
-864   -416   
-64    -704   
0      -96    
-32    -96    
-112   -384   
-16    -48    
-64    112    
0      -112   
48     272    
-112   480    
-112   416    
-272   -224   
80     -128   
112    -32    
-288   208    
48     96     
352    272    
-544   -96    
-64    -752   
64     -304   
224    1296   
304    1200   
-224   -496   
32     -384   
48     16     
-64    96     
256    -64    
96     224    
-144   144    
416    672    
208    464    
-464   176    
128    -544   
-112   64     
-48    -96    
80     -336   
624    800    
-368   -256   
48     -160   
256    -320   
144    192    
512    528    
-144   432    
80     -256   
-32    -16    
272    160    
192    304    
-320   -32    
144    -96    
48     -64    
-128   160    
192    -448   
-64    -592   
176    320    
400    -112   
-240   -880   
112    224    
64     -1376  
-208   -64    
-80    -1424  
-192   -224   
272    48     
-144   -112   
48     64     
-32    -352   
64     -1008  
80     64     
160    -128   
0      64     
208    144    
0      32     
80     432    
128    160    
-128   -112   
240    -288   
48     48     
-32    -752   
-80    -80    
320    112    
-64    -64    
240    0      
96     208    
-64    -32    
48     32     
128    -48    
-96    -208   
192    -96    
368    16     
-176   48     
224    96     
192    96     
-32    -384   
176    -32    
128    112    
128    -64    
-16    -16    
32     96     
-32    96     
48     144    
-256   -80    
-32    -112   
-144   0      
32     -64    
-80    -80    
144    -48    
96     -144   
-80    -928   
144    0      
80     -288   
-32    -112   
224    -64    
48     48     
160    -80    
0      16     
-160   16     
80     0      
16     224    
-48    -32    
-1456  -16    
160    -64    
-16    48     
64     -48    
-176   0      
288    112    
-48    144    
80     -176   
-144   -144   
144    -112   
32     96     
80     16     
16     -16    
0      64     
-48    -112   
-208   -48    
16     48     
-112   80     
-16    -32    
-80    0      
208    -544   
48     -32    
-32    -384   
112    32     
-144   32     
208    32     
-64    -32    
-64    -112   
0      32     
208    16     
-144   -32    
160    32     
-240   64     
-64    -208   
112    -32    
80     -784   
48     48     
-32    -336   
160    80     
64     32     
-48    16     
-144   32     
48     176    
16     80     
-48    0      
-224   0      
176    -48    
-880   -96    
80     -192   
48     176    
384    48     
-352   176    
160    -528   
-112   96     
144    -48    
-64    -32    
-48    -16    
-64    64     
64     32     
128    -144   
96     0      
-112   -96    
-224   144    
32     0      
-80    -16    
96     -224   
0      80     
16     -416   
176    48     
-112   -96    
64     64     
-32    48     
64     112    
-160   16     
128    64     
-160   0      
-48    -32    
-128   -96    
240    -48    
-144   -128   
16     -240   
32     64     
-192   -64    
-80    80     
-192   80     
-368   80     
-176   -48    
-128   -80    
-16    32     
112    48     
-256   0      
288    128    
-144   48     
32     -144   
16     128    
0      -144   
-112   160    
128    32     
32     32     
-32    -96    
-160   -304   
-32    272    
-256   80     
-32    -64    
144    80     
48     128    
48     -96    
-112   48     
64     -144   
-80    48     
-96    -624   
-176   -368   
240    128    
-240   144    
-208   -64    
-240   -16    
96     -16    
-32    64     
0      32     
-1104  -16    
-16    32     
-96    -160   
128    80     
80     -16    
32     48     
-80    -96    
144    128    
-192   -112   
-128   48     
48     256    
-320   -112   
80     16     
160    176    
-224   -16    
-448   -128   
240    0      
-112   -64    
528    208    
-448   48     
368    128    
16     16     
-48    48     
-112   144    
96     176    
320    112    
-240   0      
-128   128    
-256   -208   
32     -64    
-160   48     
64     256    
-1232  160    
16     192    
-32    -128   
32     32     
32     96     
-192   -48    
64     96     
112    64     
-96    128    
-16    -144   
-128   0      
-48    -16    
-144   32     
-64    -128   
96     -144   
-256   64     
-224   160    
-16    -224   
-16    304    
32     256    
96     368    
224    224    
-96    48     
-64    -336   
-112   96     
64     368    
80     16     
-80    96     
16     -192   
-144   352    
-48    -352   
48     192    
80     -32    
-144   64     
48     -80    
-176   64     
80     -48    
0      -144   
-16    288    
32     -128   
64     144    
0      48     
64     -32    
64     272    
-304   144    
-32    -80    
-48    176    
80     240    
-48    48     
96     208    
48     80     
96     112    
-64    -144   
0      128    
0      64     
112    64     
-256   -112   
0      16     
-208   -32    
80     128    
-176   -48    
32     96     
16     48     
-208   -64    
288    -256   
-128   96     
-48    32     
64     -96    
-16    128    
0      -80    
0      48     
96     16     
32     128    
-96    144    
224    -80    
-32    -48    
64     48     
80     -64    
96     160    
352    320    
-304   304    
288    80     
-160   80     
176    64     
-32    208    
80     144    
-80    0      
-96    144    
-272   -272   
96     32     
-224   -16    
128    16     
-112   112    
160    32     
144    160    
-32    64     
32     48     
0      1088   
288    752    
-192   96     
256    272    
-80    416    
48     112    
-112   -80    
48     192    
80     0      
-160   -16    
144    96     
96     80     
32     128    
-16    48     
80     64     
-96    48     
112    112    
-64    80     
464    432    
-416   32     
240    256    
-208   -240   
32     -128   
128    -32    
-64    -96    
112    160    
-112   -176   
48     -32    
80     0      
-624   -1168  
224    240    
416    1152   
-704   -368   
176    -416   
-144   368    
16     48     
-112   -144   
176    -368   
272    240    
-240   400    
48     64     
-96    -32    
-48    64     
-112   160    
112    -80    
-208   -176   
240    496    
-96    272    
-80    -16    
80     128    
-144   -80    
32     64     
80     -752   
112    192    
16     -64    
-48    -16    
112    64     
48     128    
160    64     
144    112    
-288   64     
96     224    
-144   176    
-32    112    
16     64     
0      464    
144    304    
-80    -256   
-32    48     
160    176    
48     128    
304    608    
-384   384    
32     -32    
208    32     
80     128    
-128   -96    
336    16     
-288   -208   
176    -112   
-320   -576   
-80    224    
64     -304   
-208   48     
96     -1776  
480    336    
-176   128    
384    48     
-176   176    
592    240    
-576   -288   
224    32     
-48    -96    
224    112    
-128   16     
144    0      
-64    96     
144    -16    
128    96     
-48    -1024  
0      -16    
224    80     
64     80     
16     -16    
64     112    
208    48     
-256   208    
80     96     
-16    32     
144    144    
-112   32     
288    96     
-64    -16    
16     0      
16     -96    
96     48     
192    -96    
-64    48     
144    -176   
256    224    
-240   16     
224    112    
-224   48     
128    144    
-64    0      
-32    -208   
192    48     
96     80     
-112   96     
64     -16    
144    176    
-48    -560   
-48    32     
16     -624   
0      96     
-32    64     
-48    0      
160    32     
-128   80     
144    16     
96     -160   
80     80     
176    -112   
-32    96     
32     -112   
-32    16     
64     -480   
-80    -64    
256    192    
176    112    
-64    16     
144    144    
0      96     
160    -128   
-32    80     
-64    -160   
-112   96     
272    -80    
64     144    
-176   -208   
-16    112    
48     -96    
96     144    
80     -112   
176    288    
96     64     
-64    -144   
64     -64    
368    160    
-176   -16    
-16    -32    
256    16     
-96    -160   
144    48     
64     -128   
112    224    
144    32     
32     16     
48     -224   
80     -928   
16     16     
0      -272   
240    -112   
16     128    
48     64     
0      -208   
32     -112   
96     0      
16     80     
48     80     
32     128    
112    32     
144    -384   
-64    32     
160    -384   
80     112    
0      96     
16     -32    
-336   -112   
144    -288   
160    32     
64     -768   
48     48     
32     -720   
-80    48     
144    224    
96     -16    
-48    -32    
64     128    
16     -48    
112    96     
-96    -32    
16     -96    
-112   -128   
240    -16    
0      64     
272    176    
-240   -64    
304    -800   
-272   -128   
-16    160    
48     16     
80     -128   
96     -64    
-16    -64    
-16    -96    
-256   -64    
128    64     
96     144    
-144   96     
192    -16    
-32    -128   
64     -144   
112    32     
-16    112    
96     -400   
-48    128    
240    -64    
-144   80     
48     -96    
-96    -208   
80     48     
-32    -16    
-112   80     
-64    112    
-272   192    
48     -80    
-32    -160   
224    -48    
-208   96     
48     -272   
96     32     
112    48     
-80    -48    
96     16     
-64    80     
-48    -16    
0      96     
128    288    
-352   -80    
-1072  -112   
192    848    
-352   336    
-288   -144   
144    288    
-176   -368   
240    0      
80     -1536  
64     256    
-128   48     
-64    192    
-32    -16    
64     -48    
-144   -112   
-112   -160   
-112   96     
224    128    
-576   96     
384    -112   
-288   192    
256    -208   
-368   176    
208    -256   
-160   16     
-16    16     
-32    -160   
-96    -192   
144    -80    
-80    -64    
-48    -192   
-144   -32    
208    112    
112    128    
-160   -176   
224    128    
80     -320   
-320   -528   
-32    -288   
112    176    
-864   96     
128    16     
-32    -32    
0      -128   
16     0      
-16    -256   
-96    128    
-256   -176   
-96    -160   
-32    -48    
16     -176   
192    -176   
-32    240    
-64    -288   
-400   368    
-144   96     
96     -32    
96     64     
96     64     
-208   -48    
96     -16    
-176   -48    
48     -16    
96     160    
-192   96     
128    112    
-160   336    
176    64     
-208   -496   
-624   48     
32     224    
-48    192    
-32    32     
-1120  -112   
0      160    
-80    -176   
48     -144   
-96    -288   
192    272    
-208   192    
16     112    
-144   -256   
-16    32     
16     32     
64     176    
-32    416    
-336   -304   
-64    -544   
-912   48     
144    64     
-64    -32    
160    128    
-144   -176   
0      112    
-96    -80    
-32    32     
-96    -96    
96     48     
-32    96     
-48    0      
-16    16     
-64    32     
-64    64     
-80    -64    
400    224    
-640   32     
32     -176   
-176   -608   
16     -176   
48     -48    
16     64     
192    144    
-160   80     
-64    80     
0      -112   
64     96     
192    80     
-176   32     
192    -112   
80     32     
-560   0      
160    144    
80     32     
64     160    
160    -128   
0      112    
-48    -16    
-32    -96    
-288   -624   
-112   -384   
80     240    
-32    144    
-32    16     
-176   64     
-32    272    
-224   -48    
-384   -448   
-960   -1088  
-128   -1040  
176    -656   
-192   16     
16     288    
16     176    
-96    160    
80     -48    
-96    -32    
32     48     
-64    16     
-176   -416   
512    64     
-176   656    
176    -16    
-288   -32    
-160   16     
96     0      
-240   112    
208    1040   
-272   -480   
-32    -192   
0      288    
-32    32     
-176   -224   
48     -144   
32     48     
64     160    
-144   -144   
-192   -448   
-176   416    
208    528    
-304   -336   
80     -224   
0      112    
-96    400    
320    416    
-144   32     
80     -256   
0      -64    
160    48     
-96    -256   
-144   -352   
-16    -112   
-64    -64    
-176   -144   
128    -16    
-160   -16    
-80    -160   
32     0      
-96    -160   
64     64     
-32    160    
-16    48     
-80    -144   
224    -144   
-32    -32    
48     80     
-16    112    
128    -48    
224    144    
336    160    
-144   48     
16     -128   
0      -80    
352    32     
-144   48     
176    -96    
0      -48    
288    256    
-112   48     
-128   -80    
192    144    
-64    112    
64     128    
-176   -64    
192    32     
-112   112    
128    48     
-48    16     
-32    192    
272    16     
-144   16     
80     80     
80     64     
-288   32     
-144   -64    
368    448    
-144   -160   
208    160    
16     0      
48     -176   
-128   48     
304    112    
-16    80     
32     64     
0      112    
16     112    
112    -128   
176    192    
208    112    
-32    160    
144    48     
-144   -32    
272    64     
-128   -16    
16     -48    
192    176    
-80    160    
-96    80     
16     96     
128    64     
-112   32     
272    192    
-128   48     
208    176    
-112   144    
-64    128    
-48    112    
240    -112   
-144   48     
80     32     
0      112    
48     48     
48     64     
-64    96     
112    96     
0      -96    
0      -96    
64     -144   
64     112    
96     16     
208    48     
-64    80     
144    -672   
32     16     
-128   64     
96     192    
-240   0      
192    192    
80     16     
-16    80     
96     64     
16     64     
32     0      
0      48     
0      32     
128    192    
0      128    
128    -304   
-32    64     
176    80     
64     64     
-64    240    
160    208    
128    80     
-16    64     
0      32     
-64    -96    
352    112    
0      240    
64     -32    
32     64     
128    80     
-64    -592   
128    16     
-160   -16    
-16    -80    
160    0      
16     96     
112    160    
-32    128    
16     96     
176    96     
64     144    
-16    48     
-32    16     
-16    -224   
16     -64    
240    -272   
-96    96     
-16    -1392  
16     64     
16     64     
16     48     
160    208    
128    176    
-112   -48    
0      176    
112    96     
-48    112    
-16    48     
32     -48    
0      32     
-48    0      
80     144    
-80    -480   
48     80     
96     -992   
128    48     
-112   -96    
208    128    
-32    144    
144    128    
-256   64     
192    144    
-128   128    
224    -32    
-160   48     
16     -192   
64     128    
64     -240   
64     112    
0      -288   
128    -32    
-80    -48    
208    -32    
-192   16     
64     -96    
64     -16    
-48    96     
224    64     
-80    -144   
240    112    
64     -144   
160    528    
384    256    
-352   112    
64     -128   
256    288    
-64    16     
-112   -272   
-176   -368   
256    -32    
-32    96     
112    -64    
-160   112    
64     -816   
-64    304    
176    32     
-128   -144   
48     -128   
176    48     
176    -176   
-256   -128   
96     0      
176    224    
64     64     
240    464    
64     400    
32     -48    
48     128    
112    176    
48     80     
0      80     
80     -16    
192    0      
-240   160    
160    -224   
-160   224    
-80    -304   
-48    16     
-224   -368   
176    -2512  
-48    384    
272    384    
-128   -304   
-176   -320   
160    0      
-80    -96    
128    48     
-64    -384   
112    32     
96     -80    
-64    -256   
-80    -272   
144    -512   
112    160    
0      -352   
80     32     
16     -160   
80     -96    
192    0      
-240   -1152  
16     -192   
208    0      
-144   144    
304    80     
48     224    
64     -16    
-128   -80    
320    -224   
-128   192    
192    -128   
-272   -608   
160    -160   
160    192    
-176   16     
48     -80    
80     -112   
32     -320   
-16    336    
-176   0      
-16    -688   
208    -176   
-32    464    
-16    256    
592    -160   
-624   -368   
80     -208   
-784   -224   
192    288    
112    -16    
48     -96    
80     144    
-112   -528   
32     -64    
336    -400   
16     48     
112    -16    
32     80     
80     192    
80     -176   
-144   -160   
176    304    
-192   -144   
-32    48     
160    368    
-144   -192   
-48    -240   
-96    -752   
-48    -112   
96     -768   
-64    -32    
240    416    
-80    112    
48     128    
96     -64    
-128   64     
144    -48    
-192   -32    
80     -16    
-640   -96    
80     -320   
-64    -256   
112    0      
0      144    
16     -352   
128    224    
80     -144   
32     176    
-144   -128   
80     64     
16     144    
144    -32    
-400   -16    
160    -32    
-272   0      
16     -32    
-928   -16    
48     -48    
80     80     
160    -160   
-64    -224   
32     640    
-96    -352   
480    -32    
176    784    
-80    112    
96     -304   
-144   144    
48     -32    
-112   -128   
128    304    
16     240    
176    -144   
-128   -16    
224    -192   
-176   288    
272    -736   
0      368    
-432   432    
-32    -608   
-64    -96    
-160   -208   
-160   -144   
192    -160   
-48    96     
16     -128   
48     16     
0      -176   
64     352    
112    -464   
-128   224    
-16    -720   
-64    -464   
-64    800    
80     0      
-352   -144   
80     -32    
-96    128    
32     48     
-16    -128   
224    160    
-1072  208    
-48    -96    
48     -176   
-320   752    
-288   416    
-32    64     
-800   -208   
-32    -48    
-32    -64    
32     144    
-112   -400   
-48    -80    
368    48     
-304   -96    
64     -64    
0      16     
-144   -64    
208    -160   
-288   -176   
256    288    
-272   192    
-784   -400   
112    -208   
160    96     
16     -112   
-704   -64    
-112   48     
96     -32    
-192   32     
32     -48    
32     -48    
-208   -208   
240    160    
-272   -96    
64     -96    
176    32     
48     -16    
-64    -160   
192    -224   
-32    -160   
-368   64     
-144   -80    
48     160    
-432   176    
160    -64    
-160   160    
-16    -144   
-32    64     
-96    -48    
80     -80    
-128   128    
128    -32    
128    224    
-368   208    
-16    16     
-784   -48    
240    0      
-672   288    
112    208    
-64    -16    
176    0      
176    64     
-32    -96    
48     -96    
16     -48    
-32    -112   
48     192    
-96    176    
32     96     
-256   144    
304    240    
-144   32     
0      64     
-128   0      
-288   -16    
0      128    
0      0      
-16    0      
0      144    
128    160    
-256   96     
368    224    
-32    144    
128    128    
64     -16    
32     -32    
0      16     
-432   -336   
96     -240   
-512   -16    
208    400    
32     256    
-32    80     
112    224    
0      80     
0      176    
16     96     
272    192    
-208   96     
-192   176    
-80    48     
-112   -80    
-112   -96    
160    176    
-352   0      
48     48     
-64    -112   
-112   0      
48     48     
-64    144    
-16    32     
-112   80     
80     96     
-32    64     
0      48     
-64    0      
-16    -80    
-160   -128   
32     -32    
-688   0      
128    160    
-64    16     
80     144    
-80    32     
16     112    
144    32     
-96    32     
96     -16    
-112   -32    
80     64     
160    304    
-240   64     
32     32     
-16    64     
0      0      
96     48     
0      96     
-32    -112   
-48    64     
-16    80     
64     64     
-16    32     
32     160    
128    112    
16     64     
-112   -64    
80     80     
-128   16     
96     112    
-128   -16    
384    384    
-416   224    
64     16     
128    144    
96     32     
-192   -80    
96     -80    
176    -96    
-128   32     
-32    64     
-192   48     
96     208    
64     224    
-64    176    
64     -16    
-16    -64    
96     96     
64     96     
48     128    
48     48     
96     -32    
32     144    
32     80     
-64    80     
0      48     
-32    32     
112    64     
-80    48     
144    128    
-32    -16    
-64    -128   
224    -16    
-16    112    
0      160    
48     96     
-112   -112   
32     -16    
192    160    
16     224    
-16    80     
16     48     
32     112    
64     112    
384    400    
-272   384    
48     336    
64     256    
144    128    
-96    0      
-160   16     
32     0      
-80    48     
128    112    
16     96     
80     112    
-112   -96    
16     144    
-240   112    
80     -752   
80     112    
288    112    
-144   704    
224    320    
-48    -160   
80     32     
64     112    
-96    80     
304    256    
-240   -144   
352    -64    
-176   192    
-32    -416   
96     384    
192    -80    
0      -80    
-144   -240   
80     336    
144    432    
-64    96     
192    224    
112    640    
-80    -128   
48     -48    
16     192    
32     48     
-112   -288   
400    256    
32     -32    
0      -1136  
272    192    
32     480    
-32    -16    
48     16     
-48    0      
-48    0      
208    176    
-112   224    
144    192    
-256   -64    
176    0      
-112   -32    
272    -192   
16     96     
80     -272   
288    208    
-32    -224   
32     -192   
-64    224    
-192   -272   
368    320    
32     480    
-64    0      
-32    -32    
80     48     
64     48     
-112   544    
256    -80    
-48    -160   
112    -192   
-432   -96    
480    -1376  
48     256    
304    400    
-336   64     
16     -112   
176    32     
-112   176    
608    240    
0      624    
32     304    
-272   -368   
192    -80    
-32    320    
80     -96    
-48    0      
96     -192   
32     448    
-80    -592   
64     672    
0      -128   
-48    320    
-336   416    
32     -688   
-48    176    
32     64     
32     -80    
96     560    
-80    -160   
96     32     
-176   416    
16     -1168  
-16    128    
-176   -416   
240    -400   
-64    -48    
112    176    
0      16     
80     96     
16     64     
0      96     
128    64     
32     80     
32     32     
32     -224   
160    480    
-48    -64    
80     -288   
384    528    
48     -352   
-64    592    
176    -192   
32     -64    
-16    272    
96     -128   
-32    -272   
64     -64    
-32    -288   
160    160    
32     608    
320    -208   
-96    -144   
-64    224    
192    -432   
-80    256    
112    -112   
176    352    
-80    560    
16     -144   
96     -112   
-112   -128   
-64    -224   
16     400    
288    0      
96     320    
-80    320    
176    -176   
-16    80     
-32    -160   
192    96     
-32    64     
64     -1040  
-16    96     
128    -608   
32     -1168  
16     32     
80     -96    
-64    -96    
0      -736   
400    448    
-160   528    
48     -176   
-48    16     
96     -16    
112    112    
-304   -512   
336    -80    
-352   288    
-336   -144   
0      -208   
-16    -144   
80     -576   
32     -112   
128    -96    
-64    -112   
176    448    
112    128    
-80    112    
112    -112   
208    -304   
-240   80     
16     -256   
16     48     
-496   -48    
80     208    
-256   48     
-96    -32    
256    32     
64     -80    
224    272    
-48    48     
-144   -176   
224    -176   
16     48     
-48    -160   
80     112    
80     -80    
64     -112   
64     128    
48     0      
-992   -64    
80     -144   
64     -32    
224    -48    
32     -16    
64     -112   
32     -128   
192    -2384  
128    192    
160    176    
-144   -16    
64     32     
288    -32    
-32    -64    
32     -128   
-448   -48    
-272   -192   
-272   -96    
16     -16    
400    -272   
-96    64     
-112   -144   
128    -1248  
-16    -48    
80     -32    
32     80     
-112   -128   
208    16     
-80    0      
256    0      
-144   80     
112    -80    
-864   -112   
160    -128   
32     0      
96     -48    
-64    64     
96     -352   
16     96     
-112   -560   
0      0      
64     176    
-144   0      
-64    0      
64     80     
-16    80     
80     64     
-48    80     
96     -48    
-560   -288   
464    112    
-16    304    
80     -144   
128    224    
144    448    
160    176    
-352   -400   
160    -240   
16     64     
192    -144   
-688   -144   
80     96     
-64    112    
0      -32    
-160   -16    
144    -144   
-32    -80    
-128   -608   
272    112    
-80    -928   
80     80     
-432   192    
-112   -32    
16     -112   
32     16     
-64    -32    
32     144    
32     16     
-96    -96    
288    112    
400    -176   
96     144    
-16    -48    
144    80     
0      64     
-288   -64    
-160   -48    
304    -128   
-32    64     
-128   -496   
32     -16    
-32    48     
-176   64     
16     -80    
-64    16     
-48    -224   
80     208    
-160   -48    
-96    32     
32     64     
-192   16     
-64    -16    
-384   112    
-64    96     
0      32     
-384   64     
176    -64    
-160   48     
-416   -112   
96     96     
-368   -32    
128    144    
-336   -96    
96     96     
-160   0      
-176   32     
-16    80     
-32    -48    
64     -144   
-192   128    
224    64     
-32    -32    
-48    80     
80     0      
64     0      
-96    -64    
112    96     
-112   -144   
-288   -192   
96     16     
-32    32     
0      80     
-64    32     
-48    64     
-192   -32    
-16    0      
-1088  128    
64     48     
16     32     
32     32     
-176   -64    
160    16     
-96    32     
32     0      
-128   -32    
-80    0      
144    64     
-192   -16    
-80    -32    
-112   16     
-96    176    
-640   0      
-80    112    
-192   -16    
-96    -336   
-192   -480   
384    16     
16     176    
-64    96     
16     208    
-64    -64    
-48    -352   
-80    -96    
48     -272   
-48    320    
-64    -144   
-224   -240   
176    160    
-592   -256   
80     -96    
-80    0      
16     48     
80     224    
-128   112    
32     -384   
-128   -288   
160    144    
-144   -32    
112    416    
-160   0      
-64    -80    
-192   -96    
16     48     
-256   48     
-192   -288   
16     128    
96     112    
-128   80     
-112   96     
176    128    
48     288    
192    176    
-176   80     
48     -64    
-144   64     
-64    16     
-144   320    
64     -192   
-288   -48    
-48    176    
96     32     
-32    32     
-16    96     
64     64     
32     80     
-32    48     
144    96     
-192   -304   
272    320    
80     320    
80     80     
-16    0      
352    176    
-256   320    
-16    16     
48     -16    
352    240    
-48    368    
-48    -272   
144    -96    
-48    176    
80     304    
304    352    
-208   192    
48     -80    
-288   -304   
-48    -368   
272    176    
-96    208    
-32    224    
288    -16    
32     80     
0      -64    
-160   -96    
-144   208    
160    64     
-304   -96    
-224   -256   
176    416    
-16    176    
-80    144    
-128   -32    
176    160    
-320   -80    
-96    -16    
-16    32     
-128   32     
48     32     
-48    48     
0      288    
48     416    
-16    48     
-112   -208   
128    48     
32     448    
208    448    
-576   -976   
-272   -992   
224    -272   
-176   240    
112    128    
-96    16     
272    160    
-80    336    
-64    144    
-16    96     
-48    -384   
672    416    
-288   992    
112    -80    
-368   -768   
-160   -16    
48     -16    
192    112    
160    448    
-336   -752   
-48    464    
48     416    
192    -240   
-64    416    
-112   -128   
-80    112    
160    80     
-400   -528   
-48    -128   
0      464    
-48    176    
-384   -128   
96     -48    
0      80     
-48    352    
160    -224   
96     576    
48     -48    
32     352    
-80    32     
272    32     
32     160    
-16    -16    
-16    64     
-176   -272   
0      -240   
-80    -640   
400    -16    
-240   416    
208    -224   
-80    -64    
160    80     
-48    -448   
208    0      
64     -16    
-16    32     
160    -208   
64     128    
144    320    
-112   -336   
192    400    
-80    -432   
-32    -224   
192    256    
-48    128    
-144   -400   
128    -144   
-224   -16    
240    256    
80     496    
32     -16    
-368   -592   
240    0      
-48    64     
96     272    
32     272    
224    -560   
32     112    
144    432    
96     -16    
16     -32    
144    -288   
-32    176    
160    96     
-64    -80    
224    224    
32     112    
48     176    
240    160    
-288   0      
272    32     
-160   -48    
144    160    
-96    208    
96     80     
-32    32     
192    288    
-16    112    
-48    144    
224    192    
208    144    
-48    0      
80     64     
128    80     
64     -304   
0      32     
64     -288   
80     128    
128    16     
160    336    
-96    32     
16     128    
128    -64    
-80    -160   
96     -96    
192    48     
-32    80     
144    160    
96     -16    
-32    -64    
176    128    
48     0      
16     48     
112    -608   
-112   80     
64     -384   
96     16     
-32    -48    
80     112    
304    336    
-176   80     
-112   144    
176    -96    
0      96     
-64    64     
-16    160    
-16    -176   
-80    -64    
176    -80    
96     32     
-96    -48    
144    112    
16     48     
80     64     
-80    0      
48     64     
-32    48     
-160   48     
80     416    
-64    16     
80     -192   
-80    -1024  
224    176    
0      -256   
96     144    
16     16     
-112   224    
160    -224   
224    224    
0      0      
128    160    
176    48     
192    -208   
80     32     
320    -32    
-80    176    
80     320    
144    384    
160    272    
144    272    
-128   -128   
-32    -64    
128    -16    
-240   -64    
144    16     
112    160    
208    -1392  
-128   -112   
-48    -112   
192    -288   
-32    -32    
16     64     
144    160    
0      -48    
64     144    
32     -208   
64     -800   
112    160    
32     0      
304    480    
-512   16     
224    -320   
16     48     
16     -464   
0      0      
112    -256   
176    64     
-32    0      
80     -176   
-48    0      
-96    -144   
240    -272   
-80    80     
-32    -80    
-64    0      
-128   96     
16     224    
96     -32    
-80    0      
336    -64    
-32    -336   
96     0      
64     -2272  
16     -160   
0      192    
160    32     
-384   16     
320    64     
-336   -256   
496    -128   
-192   48     
112    -16    
-608   32     
96     -208   
144    32     
-144   -288   
0      -80    
240    -48    
0      80     
384    -64    
0      160    
-80    -128   
-32    64     
176    32     
368    160    
-400   96     
128    -80    
-864   -80    
128    -208   
144    -160   
48     -192   
128    -16    
48     -272   
48     -48    
0      -1888  
-160   64     
-64    -192   
48     -144   
-80    -16    
144    80     
-192   -48    
-16    -16    
-480   -112   
288    160    
-768   224    
-96    192    
64     32     
80     -112   
0      32     
96     -320   
208    144    
32     16     
-80    32     
16     -32    
224    112    
-160   96     
80     -16    
-128   -80    
-16    112    
-160   96     
-32    -48    
0      -16    
-64    -464   
272    128    
160    256    
32     272    
48     80     
144    176    
-272   0      
64     -176   
-32    -112   
-64    32     
-368   -208   
48     -48    
-336   -64    
64     -96    
-800   32     
112    -128   
-32    48     
64     -160   
16     64     
80     -1296  
64     0      
-192   -384   
160    -96    
-144   320    
-208   -368   
128    256    
0      112    
-176   144    
112    -304   
32     480    
-64    -352   
112    80     
112    -432   
0      208    
64     -32    
-176   -96    
16     48     
64     144    
-224   96     
80     -128   
-48    -16    
64     224    
0      -112   
0      -32    
48     144    
-192   -96    
176    48     
-400   -272   
-96    160    
96     64     
-480   -48    
0      -144   
-144   0      
-112   16     
0      -272   
0      240    
208    416    
-208   208    
16     -176   
-176   16     
-544   -224   
32     64     
-336   -96    
-208   0      
-160   0      
80     0      
-80    48     
-560   0      
-96    32     
-128   96     
0      64     
64     16     
-400   -112   
-880   -336   
144    128    
112    160    
80     304    
-80    96     
-96    -96    
-32    0      
-240   -48    
-48    -48    
-144   -112   
-192   -112   
-352   -448   
32     -112   
-192   -16    
-32    -64    
-128   -128   
64     -32    
0      -96    
80     528    
608    448    
-624   0      
-96    -320   
224    -496   
128    368    
112    160    
-256   -144   
80     -192   
-224   -32    
-352   -128   
96     -304   
192    -336   
-32    -16    
-416   -432   
288    176    
0      288    
80     336    
-48    384    
-48    48     
128    -32    
-192   160    
-240   -368   
-288   0      
128    96     
-336   0      
192    -96    
48     176    
112    256    
-208   -576   
128    256    
16     384    
-240   -608   
16     -176   
-480   -336   
352    272    
-288   320    
-16    -48    
16     32     
-16    160    
-176   -16    
-16    -80    
-544   48     
544    688    
-544   -416   
128    208    
64     64     
-176   0      
-208   -32    
-176   32     
96     288    
272    1168   
-608   -480   
-64    160    
48     352    
-208   288    
32     240    
-320   -208   
0      128    
208    432    
-144   64     
16     -144   
-192   -352   
160    64     
48     384    
64     304    
128    224    
16     -32    
-144   -48    
-16    176    
32     48     
-16    80     
-160   160    
0      336    
112    160    
-112   96     
0      160    
-32    112    
-128   96     
112    160    
-144   240    
-96    112    
-32    304    
-64    160    
224    416    
-368   288    
0      176    
-368   -144   
-80    176    
112    48     
16     0      
304    384    
-368   128    
64     -32    
-144   -96    
16     0      
32     -96    
224    0      
-16    -16    
128    112    
128    128    
-80    48     
256    384    
-320   256    
96     96     
96     64     
192    80     
-80    32     
0      112    
16     16     
32     32     
-208   -16    
128    0      
-368   -176   
192    16     
-144   80     
368    112    
-144   16     
112    -32    
-32    80     
208    176    
16     48     
-48    48     
64     352    
-16    -32    
64     160    
16     112    
384    336    
-448   240    
272    352    
-528   -48    
192    208    
400    464    
-448   0      
-64    -48    
96     80     
80     64     
-192   -32    
112    160    
-48    112    
16     80     
-224   -48    
176    96     
-320   0      
96     80     
-96    64     
16     64     
-16    64     
-16    32     
80     -32    
112    112    
0      48     
112    96     
0      -16    
0      80     
32     64     
-48    0      
112    80     
-16    48     
128    64     
-48    112    
-176   192    
352    208    
-208   144    
144    96     
-64    144    
96     112    
208    208    
-352   96     
48     64     
160    128    
-272   -160   
-48    -64    
32     0      
16     112    
-32    256    
96     -1920  
176    144    
-64    96     
80     128    
0      192    
-48    32     
-64    -272   
-48    -176   
64     -16    
-48    0      
80     32     
112    176    
-128   -64    
160    -128   
-112   112    
384    -416   
-16    80     
16     -192   
160    176    
160    208    
80     256    
-16    192    
112    112    
256    176    
-32    96     
16     -144   
224    224    
-80    80     
144    -16    
-48    64     
96     -304   
48     96     
-144   -144   
176    112    
112    32     
48     192    
32     -176   
288    -32    
-64    160    
160    144    
-192   -160   
160    48     
48     -144   
0      0      
64     0      
-128   -864   
304    608    
48     -160   
128    96     
0      80     
64     32     
-48    272    
208    -64    
-192   -160   
304    144    
-80    256    
192    32     
48     144    
-32    -112   
80     16     
-64    -128   
144    64     
-64    -96    
144    16     
-16    144    
160    -112   
128    -96    
48     176    
176    80     
80     128    
-32    128    
160    64     
-80    -112   
272    -128   
-80    80     
304    32     
-240   96     
224    -192   
48     128    
48     -656   
48     96     
-144   -224   
64     48     
128    208    
160    112    
-112   0      
-64    -16    
64     96     
-48    -240   
288    32     
32     -80    
0      -160   
0      -688   
192    128    
-288   -128   
112    128    
176    128    
-112   240    
-160   -496   
176    -16    
208    112    
-208   0      
256    128    
-96    -32    
336    224    
-16    -624   
144    160    
96     -80    
64     128    
48     -16    
-32    -80    
224    64     
-48    144    
144    64     
0      144    
-16    -96    
208    208    
48     -176   
-64    -208   
128    192    
-48    0      
336    336    
-176   272    
64     -128   
128    464    
80     336    
64     -176   
48     -608   
-176   -224   
64     80     
128    -32    
16     -336   
176    -560   
-192   -976   
128    240    
96     -176   
-48    416    
80     -64    
-176   -288   
96     -80    
96     -720   
-160   80     
32     -560   
-176   64     
-624   -48    
-160   -336   
176    -144   
-32    -144   
80     -48    
16     128    
224    -96    
-224   -1680  
160    -256   
-16    -32    
128    64     
-96    -224   
176    -112   
0      -80    
64     208    
-256   144    
128    -80    
-80    -32    
48     -96    
16     -64    
224    -192   
0      -256   
128    -752   
96     -64    
16     -80    
80     96     
32     128    
-48    64     
-32    0      
32     -48    
-416   -320   
320    -128   
-528   352    
112    80     
112    -48    
32     -112   
-32    -208   
112    -496   
-160   -80    
-304   -1328  
80     80     
32     -240   
144    240    
48     208    
144    -64    
-96    -112   
256    112    
-112   -32    
80     -64    
48     -32    
128    112    
96     80     
224    -192   
-96    16     
112    -464   
-16    80     
64     -64    
-32    48     
-80    -256   
80     -96    
0      -288   
224    -176   
-48    128    
192    -64    
-400   96     
176    -96    
-80    112    
160    -16    
-288   -176   
672    -144   
-80    560    
272    144    
-80    16     
-96    -144   
288    -416   
144    288    
-16    160    
-80    -288   
176    -96    
-336   -48    
288    -496   
-656   -16    
80     -160   
-48    16     
256    -304   
-160   -400   
-64    -608   
400    -304   
-16    224    
-224   304    
32     -256   
64     -256   
-64    112    
-128   -112   
-256   -496   
-64    48     
176    144    
-288   -64    
128    80     
-32    32     
160    96     
112    -1584  
80     128    
-272   -112   
304    80     
-256   -32    
80     -80    
-112   -192   
80     -256   
112    32     
-160   -384   
16     64     
-112   80     
112    304    
48     -48    
96     192    
-144   640    
64     288    
-96    -96    
-160   -16    
-96    -96    
-64    -80    
-240   -144   
32     -32    
-48    -320   
-128   -256   
224    32     
-768   112    
-48    96     
-544   -128   
-912   32     
-16    32     
-112   32     
-128   -80    
-592   -16    
-96    0      
16     -112   
-16    32     
160    272    
-48    144    
-416   320    
48     240    
-368   -160   
-80    64     
-128   -48    
0      208    
-64    64     
-240   -112   
-144   -176   
384    192    
-176   128    
-512   -48    
-224   -16    
304    0      
-64    32     
-256   -80    
-32    -16    
32     -160   
112    32     
128    0      
-96    -16    
-208   -16    
-336   -112   
-48    16     
-160   0      
160    80     
-400   -80    
-64    32     
-2896  -48    
-48    -160   
16     -176   
160    160    
32     -192   
48     80     
96     80     
-80    0      
-96    0      
-32    128    
112    64     
32     288    
-80    -128   
-176   -96    
48     64     
-992   -16    
-16    112    
80     160    
48     16     
-64    -256   
-16    160    
16     -80    
16     96     
-48    144    
96     96     
32     96     
-176   0      
0      48     
-256   -144   
144    -32    
-160   0      
-80    112    
112    -80    
-64    48     
64     -176   
256    368    
-432   176    
192    -144   
-160   0      
208    -48    
-512   -16    
240    48     
-128   64     
0      48     
-48    80     
-320   -80    
-112   -144   
96     -240   
224    208    
16     64     
32     80     
-16    96     
128    160    
0      48     
-128   0      
112    64     
-16    96     
0      32     
32     48     
64     80     
-224   0      
96     112    
-400   -32    
80     144    
-80    0      
32     64     
48     112    
-160   -48    
-16    64     
400    336    
-352   64     
-48    80     
192    80     
-208   -48    
112    64     
-240   -96    
144    80     
-48    -128   
112    0      
-192   192    
160    240    
32     80     
-112   0      
128    48     
-32    -32    
-16    48     
-32    -96    
0      64     
-224   32     
224    496    
-272   208    
112    176    
-96    -16    
-32    0      
176    -16    
-96    64     
240    272    
-224   80     
-48    -32    
48     64     
144    80     
-32    0      
-64    64     
112    48     
-48    48     
128    160    
-48    48     
-256   -96    
240    -160   
144    128    
-112   48     
64     128    
-112   32     
16     96     
-80    16     
-80    -32    
112    -16    
80     144    
-192   0      
128    144    
-16    224    
128    112    
96     128    
-48    -80    
48     -16    
-16    144    
112    112    
-80    80     
-16    -16    
-176   0      
432    48     
64     -16    
48     48     
-160   -48    
80     112    
160    400    
16     160    
-64    -64    
192    160    
0      48     
176    128    
-96    32     
128    144    
0      64     
80     112    
-96    32     
304    224    
-48    144    
-64    -16    
80     96     
0      0      
16     -64    
-224   -256   
240    -608   
176    64     
304    272    
-96    64     
208    32     
-48    48     
80     -16    
208    0      
96     48     
16     48     
0      -32    
160    32     
176    128    
-176   96     
80     96     
-96    -16    
-208   -16    
256    -32    
192    48     
32     128    
-96    96     
80     48     
-32    240    
128    128    
-80    32     
-32    -128   
-32    0      
288    272    
-288   -2976  
-32    -320   
-112   -224   
-144   -336   
32     80     
-64    160    
-112   0      
-176   352    
96     96     
-64    80     
48     48     
144    160    
-112   48     
64     -96    
144    496    
-48    -352   
-32    -160   
592    -16    
-368   -192   
160    368    
64     -64    
96     416    
-48    96     
-16    -544   
-48    272    
0      160    
80     -144   
-80    -32    
-64    160    
112    -16    
-16    -80    
96     160    
0      -48    
-96    16     
224    80     
16     112    
32     -320   
-80    224    
272    -112   
-128   192    
32     32     
-144   -144   
96     128    
64     16     
-32    48     
80     -320   
-16    32     
224    -1008  
-80    112    
112    112    
32     64     
16     -96    
32     64     
-224   -16    
272    16     
-112   -16    
0      112    
80     -16    
-112   -64    
80     496    
128    144    
-112   144    
16     32     
160    -16    
-80    -368   
0      112    
48     -32    
48     -256   
-112   -144   
272    96     
-144   176    
-16    -80    
-64    32     
48     -128   
16     112    
0      -128   
208    144    
96     -128   
-16    112    
32     -1184  
192    64     
-48    -16    
80     64     
144    384    
48     80     
-176   -320   
-32    -656   
112    64     
-64    -416   
160    -16    
192    64     
32     128    
96     -368   
16     96     
320    -192   
-112   352    
-176   -64    
176    -256   
96     0      
192    208    
80     48     
80     -80    
-16    80     
16     80     
288    192    
112    336    
-144   -272   
-80    -288   
304    272    
80     32     
64     -80    
144    368    
0      352    
-48    -224   
48     -32    
-16    -32    
-176   -928   
128    176    
160    -800   
96     480    
48     -480   
128    304    
-96    -416   
112    16     
16     96     
160    -1040  
32     -176   
96     -512   
48     0      
16     128    
48     -16    
64     272    
160    -672   
-368   -544   
176    -304   
-48    64     
96     -32    
192    -288   
16     -144   
64     -80    
48     -64    
-16    416    
240    256    
-48    112    
-32    0      
64     -96    
-80    -480   
160    -800   
-32    -176   
384    -128   
208    144    
80     -752   
-240   32     
48     272    
224    272    
-384   -144   
192    -16    
-48    64     
160    32     
-160   -144   
144    -288   
-800   96     
0      -80    
416    80     
-176   -400   
-64    -224   
64     -1392  
-128   112    
320    -144   
-48    -16    
208    -16    
304    32     
-272   -160   
656    -64    
-592   -16    
496    48     
-896   0      
304    96     
-80    -128   
48     -64    
-48    -160   
80     -176   
-48    -96    
128    -752   
208    96     
16     -80    
16     -48    
96     -176   
80     64     
240    -16    
-64    0      
-416   32     
-112   -16    
128    208    
-32    -144   
-256   -64    
304    -64    
-144   80     
160    -864   
48     192    
160    128    
-48    0      
80     32     
96     -128   
112    -96    
128    -32    
-304   -80    
128    -80    
-448   -32    
112    16     
80     -48    
-80    -256   
80     32     
0      -944   
0      48     
16     -32    
64     16     
-176   16     
64     96     
-112   -32    
-80    0      
32     32     
144    -16    
-368   -32    
-32    -80    
-96    192    
64     -112   
16     32     
64     -160   
80     96     
16     -128   
-32    32     
128    -16    
-160   -64    
288    176    
-80    0      
-16    224    
-80    32     
16     -80    
128    -32    
80     32     
32     -128   
-64    64     
160    -32    
-128   128    
-96    256    
128    -96    
-336   -192   
256    32     
-80    96     
-16    -48    
16     112    
-32    -336   
-272   16     
112    -112   
-208   -64    
144    -144   
16     96     
-48    -320   
-16    80     
16     32     
-48    -208   
-16    -64    
128    64     
-272   16     
336    64     
-64    -16    
-16    0      
32     32     
48     -48    
112    112    
-272   -208   
-48    144    
-304   -240   
-592   128    
-160   64     
0      176    
48     96     
-736   -160   
-96    -48    
224    0      
64     96     
80     0      
48     32     
-96    -112   
256    224    
-112   -144   
-32    144    
-48    -80    
-224   32     
-64    240    
80     16     
-80    -32    
-464   -32    
-496   -48    
288    48     
-32    48     
-64    32     
-16    -16    
-224   -96    
144    256    
-16    32     
-176   48     
80     64     
-80    -16    
-16    96     
-80    64     
16     32     
-96    -32    
-80    192    
96     160    
-208   0      
-1024  16     
-224   -288   
16     -208   
128    176    
-16    0      
112    128    
-96    80     
-48    48     
16     336    
64     96     
32     48     
-16    80     
112    -64    
16     0      
-112   48     
-688   -96    
-112   -16    
208    32     
0      -128   
-96    -96    
-16    224    
-272   -48    
-32    -80    
208    400    
-224   272    
-400   -816   
-208   -400   
272    112    
-464   -240   
208    112    
-448   0      
112    64     
-144   304    
192    592    
-48    64     
-80    -16    
64     80     
80     -96    
-160   -16    
176    32     
-48    192    
-112   16     
-112   112    
256    272    
160    192    
-112   128    
112    160    
-1120  0      
-112   64     
272    400    
208    384    
64     288    
-112   192    
-416   -384   
-96    0      
16     16     
-112   128    
96     384    
-256   336    
32     -32    
-208   -288   
224    96     
-1296  96     
176    -352   
-112   -80    
112    16     
-32    112    
64     64     
32     112    
-320   -240   
496    176    
-160   112    
176    -128   
-80    560    
176    112    
-208   -96    
112    64     
-352   32     
-80    480    
-96    -32    
-64    352    
0      48     
48     272    
-64    80     
-64    32     
0      176    
-128   -464   
224    48     
-208   16     
96     96     
-64    0      
48     112    
-64    64     
-96    64     
48     32     
-64    0      
16     -32    
-16    32     
64     80     
80     176    
16     -32    
-112   -192   
256    448    
-176   240    
16     -96    
-64    -64    
96     272    
80     144    
-16    -16    
48     96     
-64    80     
64     -288   
0      -128   
-48    -16    
16     -144   
-64    192    
-16    112    
144    128    
-192   -208   
-48    -192   
-128   208    
-32    -336   
16     -288   
128    -80    
-80    64     
176    0      
176    48     
-224   144    
176    -16    
-64    128    
144    48     
-128   80     
32     64     
0      80     
16     32     
-64    32     
-128   -48    
416    288    
-192   -208   
-144   -224   
400    -16    
-112   304    
160    144    
16     -160   
-16    -32    
192    -176   
-128   0      
112    -112   
32     0      
144    688    
-128   176    
128    48     
160    528    
-80    128    
32     0      
16     128    
0      -80    
-176   -288   
80     16     
-48    -128   
128    128    
-144   144    
64     -16    
32     -48    
144    320    
0      16     
240    208    
-96    -208   
48     432    
240    208    
-96    352    
144    -208   
-336   -192   
560    1248   
-320   208    
208    -288   
-160   0      
112    32     
-64    0      
240    -448   
-160   96     
80     -1600  
96     96     
-32    -272   
80     336    
-16    -96    
32     -64    
16     240    
96     128    
0      -176   
160    192    
-96    -224   
80     176    
16     160    
-64    -256   
-144   32     
48     -368   
-16    32     
0      64     
-64    -224   
-96    96     
224    128    
16     464    
-48    432    
-16    -208   
112    32     
64     -16    
240    160    
-224   -80    
208    -112   
-144   -128   
528    0      
-192   192    
112    -400   
-64    32     
224    96     
112    32     
-112   224    
96     256    
-176   112    
576    576    
-224   160    
48     16     
288    -32    
0      -112   
128    96     
-80    -320   
144    0      
96     -1040  
-208   0      
48     -336   
160    -384   
112    -272   
48     16     
16     -112   
32     16     
-32    160    
32     16     
-80    64     
-112   -336   
144    -80    
96     -176   
-64    96     
256    -320   
0      80     
144    -992   
-112   0      
96     -192   
64     64     
32     96     
-176   -224   
-208   -336   
288    -224   
32     112    
160    -16    
-48    144    
32     32     
64     112    
64     -176   
368    256    
-224   -640   
-64    192    
288    -48    
0      32     
32     0      
-96    64     
112    112    
64     160    
0      144    
128    -64    
48     336    
-128   -80    
256    144    
16     -112   
112    32     
-32    -176   
224    224    
192    64     
-16    32     
112    -32    
48     160    
160    96     
-96    -480   
96     176    
16     96     
32     336    
-112   -96    
-80    0      
144    -352   
192    32     
128    -16    
96     16     
-128   32     
160    -1360  
-112   -32    
80     -272   
48     -672   
112    -64    
-16    -416   
320    -32    
-176   0      
192    -176   
-160   112    
176    0      
80     80     
-32    -176   
224    -368   
-32    144    
-32    -480   
32     -80    
-32    80     
128    -16    
-80    32     
64     -112   
-48    -64    
48     -1904  
112    -32    
-144   -208   
240    32     
288    320    
-288   192    
320    -240   
-176   112    
208    -128   
-16    48     
-256   -32    
32     -176   
0      -32    
112    -336   
-32    -272   
64     -112   
112    80     
64     -336   
-112   -160   
144    -208   
288    16     
-144   -256   
144    256    
96     -96    
-240   -16    
-320   96     
128    32     
-1120  -32    
32     -32    
96     0      
48     144    
288    288    
-48    -16    
48     -240   
48     -416   
64     112    
208    -48    
-48    80     
96     -32    
32     -16    
80     176    
-112   -16    
-32    -32    
128    -64    
64     96     
192    -272   
48     -80    
128    -96    
-112   -48    
48     48     
96     64     
112    -16    
-160   16     
-176   -64    
160    -16    
32     48     
0      -48    
-160   -32    
80     -128   
-864   -48    
128    -192   
112    48     
-96    -128   
128    0      
-16    -1344  
256    96     
-112   -96    
64     -32    
-48    0      
-160   32     
32     -80    
384    240    
-560   80     
-16    -16    
-80    0      
-16    176    
128    -432   
112    -480   
-80    144    
496    -112   
-128   -192   
-64    -352   
256    272    
-304   96     
112    -224   
-176   -80    
-96    -160   
-576   -96    
64     96     
112    128    
-16    48     
0      208    
16     -224   
0      -48    
160    -16    
64     -48    
32     -96    
48     144    
-624   32     
176    -32    
-288   -96    
224    128    
-64    352    
-48    288    
80     496    
-384   -272   
176    -272   
-80    -256   
-144   -112   
128    -160   
-16    144    
-144   48     
144    -16    
-256   -144   
64     80     
-96    80     
-64    0      
-112   -16    
304    368    
-400   160    
-128   -384   
272    -32    
224    528    
-304   -192   
-1232  -480   
-144   128    
-176   16     
-32    -96    
112    32     
-336   144    
-144   -304   
224    -176   
-368   96     
288    -144   
-112   336    
272    -112   
0      -16    
224    48     
-288   144    
496    -48    
-1008  192    
384    16     
-176   288    
-368   80     
-944   -272   
-112   -112   
-976   160    
-160   48     
64     -32    
16     432    
-320   176    
-96    -304   
-304   -336   
0      160    
32     528    
-176   64     
-192   -416   
128    224    
-48    16     
-256   -256   
-80    400    
-544   80     
144    128    
-32    304    
-80    -544   
80     80     
-144   560    
-112   -176   
80     112    
-224   -336   
208    96     
-256   48     
112    -16    
-48    64     
-160   32     
80     48     
-160   64     
-112   -48    
-1600  -576   
208    -144   
192    496    
272    496    
-144   272    
-176   64     
80     -144   
-80    208    
-64    -304   
-112   -128   
160    288    
-240   -32    
0      -48    
-320   -464   
-176   -528   
-128   64     
-32    400    
-16    32     
0      48     
80     256    
-80    240    
32     96     
192    128    
16     -64    
64     112    
112    880    
16     48     
-64    -80    
-176   32     
80     -32    
-144   112    
-160   32     
-160   0      
112    112    
16     144    
-96    0      
32     80     
0      48     
-16    64     
-64    -16    
144    -64    
-240   -160   
-112   -112   
352    -192   
32     624    
-112   -112   
-144   -928   
-784   400    
-240   608    
112    -560   
16     256    
-160   48     
32     -240   
-16    400    
-112   64     
-48    304    
-64    -240   
96     304    
-256   -240   
112    80     
-272   -80    
0      224    
-240   -208   
-192   -272   
80     352    
-64    -176   
16     -16    
-16    48     
16     -288   
16     112    
304    512    
-128   144    
-16    -208   
-32    -144   
32     192    
16     400    
144    192    
-160   -80    
-32    16     
-32    96     
176    0      
48     -16    
-96    32     
0      -112   
176    -320   
-128   -128   
128    -32    
-48    32     
-112   160    
-16    272    
-176   144    
64     -272   
-192   -192   
224    -32    
-224   160    
96     0      
-112   96     
32     160    
-48    128    
16     112    
-128   -80    
112    112    
-240   -208   
240    0      
160    128    
-176   32     
64     80     
-160   32     
16     64     
32     192    
96     112    
32     80     
-16    0      
112    -48    
224    32     
-256   0      
368    80     
-144   96     
192    80     
-48    128    
16     0      
-144   32     
128    176    
-288   -288   
432    160    
-128   272    
0      16     
64     96     
16     48     
0      -48    
32     -112   
0      -160   
-32    112    
480    448    
-560   272    
128    192    
-144   -48    
32     -16    
192    32     
176    48     
-32    96     
-128   192    
-128   32     
-64    32     
-128   160    
-48    368    
96     128    
-48    144    
-32    16     
0      0      
-32    32     
432    144    
-112   80     
-48    16     
32     -64    
-160   -144   
0      80     
-96    -48    
-32    144    
-16    80     
-80    192    
-80    16     
-128   -16    
-16    -96    
-80    -96    
32     144    
-32    64     
176    176    
96     176    
48     160    
192    176    
32     48     
-64    16     
208    208    
-64    208    
-384   128    
-160   -144   
128    -16    
224    144    
-128   -112   
-112   144    
96     -2272  
48     96     
192    48     
-48    96     
-16    64     
0      64     
-16    16     
16     48     
32     48     
448    352    
-400   96     
176    -192   
-144   32     
64     -192   
-48    80     
64     -96    
160    64     
-96    32     
256    144    
96     160    
32     128    
0      64     
48     112    
160    32     
144    96     
-64    -16    
-32    96     
224    176    
-176   -96    
112    176    
208    64     
-48    64     
96     -976   
0      48     
64     96     
-32    128    
48     -16    
0      -48    
16     -48    
112    0      
-192   -144   
192    -80    
32     208    
128    0      
-128   64     
208    -240   
16     48     
48     -192   
160    208    
-208   -224   
80     96     
-160   -288   
128    -128   
-32    48     
16     80     
0      -48    
96     -80    
32     -32    
176    -208   
-112   64     
304    -128   
80     128    
64     -432   
-48    112    
272    -80    
0      128    
-48    -176   
112    -48    
192    192    
16     272    
0      0      
32     64     
80     96     
16     16     
144    112    
16     -96    
-32    160    
112    -80    
192    128    
-96    -320   
-32    208    
-32    -64    
32     240    
-160   96     
192    -160   
112    -192   
80     -272   
-144   -128   
176    -160   
160    208    
160    -80    
-64    384    
160    -304   
-64    256    
0      -2640  
0      32     
112    64     
144    48     
0      96     
64     80     
-16    -336   
-64    -576   
80     448    
144    240    
16     112    
-64    -240   
64     -80    
32     -128   
128    384    
32     -272   
0      -560   
-96    -192   
224    -1184  
-80    432    
-208   -400   
128    272    
64     192    
16     -896   
144    -16    
0      -2448  
384    -16    
144    96     
80     112    
112    80     
128    0      
-240   -624   
240    -480   
-16    336    
96     -48    
-1168  -560   
224    48     
32     544    
96     -640   
16     16     
48     -688   
272    256    
-288   96     
96     -240   
320    -48    
-256   -48    
480    -48    
-352   96     
176    -400   
240    112    
-400   -32    
96     96     
-128   -176   
48     -368   
160    -128   
16     416    
320    176    
-144   -256   
32     -288   
-80    -240   
-112   192    
-256   -288   
-240   -576   
-16    -160   
-96    16     
48     80     
-16    32     
288    -112   
256    32     
160    224    
64     -128   
64     -16    
48     -464   
-112   -64    
288    32     
128    16     
176    48     
-32    112    
-256   0      
448    -48    
-176   32     
288    432    
96     160    
-304   -304   
336    -400   
128    -528   
464    464    
-272   -144   
272    -496   
48     32     
48     -112   
240    -128   
-112   80     
-144   48     
80     -112   
-64    -192   
176    352    
-352   240    
176    -224   
-1376  96     
-16    -96    
96     32     
-80    0      
-16    32     
64     -416   
208    400    
-128   -368   
192    -240   
32     224    
-16    -208   
-64    32     
256    160    
-304   32     
256    -256   
-64    112    
16     64     
48     16     
32     -96    
48     64     
48     -304   
-16    -304   
-112   176    
16     -752   
160    176    
720    736    
-688   1136   
-224   -1120  
112    -176   
-32    640    
-32    -944   
272    -64    
-384   -176   
400    -144   
-256   368    
80     -1200  
112    32     
-48    48     
64     464    
-288   -192   
128    64     
-400   16     
112    -96    
-208   256    
320    -352   
-64    0      
-32    -416   
256    256    
32     -192   
16     16     
32     80     
16     0      
-128   -240   
0      0      
0      -32    
-32    0      
-160   32     
80     80     
16     80     
32     -112   
-176   16     
368    -208   
-400   -384   
-192   -272   
96     32     
-240   -320   
-560   48     
16     -160   
-96    -464   
64     -80    
-832   -224   
-80    -272   
16     -96    
-16    80     
64     -496   
-368   -240   
144    -224   
-160   192    
-144   -160   
32     128    
16     0      
16     -96    
208    48     
-208   32     
-32    96     
-112   96     
-48    32     
-880   0      
16     -64    
16     -48    
144    112    
-80    -64    
160    96     
-16    -64    
-224   32     
224    224    
-304   64     
-48    144    
80     32     
144    240    
-432   80     
32     112    
-288   32     
64     112    
64     0      
112    80     
-256   -192   
336    128    
-112   -256   
-208   -48    
80     64     
-80    0      
-16    96     
-320   208    
192    192    
-496   -208   
304    -272   
-352   -32    
16     -16    
-912   -128   
0      208    
-80    -80    
32     224    
-48    64     
-16    112    
32     112    
-64    16     
-16    80     
-48    32     
-16    -16    
-48    16     
144    160    
32     16     
-128   64     
-480   144    
0      176    
32     160    
288    64     
-192   -400   
208    -176   
32     48     
-80    -16    
144    0      
-288   48     
240    112    
-240   -32    
16     96     
-208   -112   
-32    96     
-176   -80    
-48    -64    
-832   -64    
-80    -96    
272    224    
-48    240    
48     384    
176    1248   
304    656    
-192   128    
-32    192    
64     48     
48     112    
-192   -240   
272    -256   
48     -176   
272    208    
-736   -48    
208    144    
288    16     
-48    -80    
112    112    
96     48     
144    128    
-224   -160   
-112   -16    
-64    64     
-48    64     
-16    224    
304    144    
-96    -64    
112    64     
-352   -80    
-16    32     
192    112    
64     96     
-304   -80    
-160   112    
-16    -16    
-80    32     
48     112    
-112   48     
272    128    
-192   32     
48     80     
-96    0      
-48    -112   
144    96     
-80    192    
96     64     
-96    0      
-112   -96    
288    16     
-32    128    
32     0      
32     96     
192    96     
-112   32     
-96    -32    
176    80     
-256   -16    
112    80     
48     -64    
32     80     
224    144    
32     -272   
-192   -32    
96     128    
-80    128    
96     96     
-16    48     
-64    96     
32     16     
-128   0      
64     48     
-48    0      
-32    -80    
80     32     
-64    96     
48     96     
-208   48     
0      0      
160    176    
80     96     
-128   48     
0      96     
-128   -32    
112    128    
-80    48     
96     144    
-208   -16    
64     80     
-128   32     
16     -64    
208    192    
-128   112    
144    64     
-32    64     
-32    -80    
48     96     
64     -32    
-192   -176   
208    48     
-160   -192   
144    64     
-80    32     
80     128    
48     32     
304    256    
-288   288    
352    304    
-208   -48    
64     16     
112    16     
-224   16     
240    304    
144    528    
32     432    
32     192    
32     96     
-32    -80    
192    176    
-16    336    
32     240    
64     -80    
64     16     
48     16     
-32    96     
208    160    
-16    48     
48     -64    
64     208    
-96    144    
-80    -304   
192    -144   
112    160    
-80    -320   
128    752    
-160   -320   
304    592    
-192   480    
272    400    
-288   208    
-160   -608   
16     112    
144    304    
-256   240    
128    32     
-16    160    
64     -144   
-32    -16    
64     -2528  
208    0      
-32    144    
304    368    
64     384    
-112   80     
64     -48    
64     128    
16     0      
64     144    
96     80     
64     96     
352    432    
-112   256    
208    48     
-128   -192   
-32    -32    
-16    -128   
48     128    
96     96     
-112   0      
-80    -32    
16     144    
-288   -128   
176    80     
-192   160    
64     80     
-64    96     
-480   -608   
416    -544   
-176   -384   
304    -176   
-64    -2144  
160    16     
64     -128   
-112   16     
208    128    
96     0      
112    128    
240    160    
-128   224    
-112   -272   
-128   -48    
256    0      
16     112    
-112   -592   
-16    -80    
256    -592   
-144   112    
400    -592   
-64    176    
192    304    
368    432    
16     624    
-32    416    
368    192    
-96    16     
-64    -96    
160    -32    
128    544    
-160   240    
128    160    
-128   -80    
192    -640   
-64    -144   
192    48     
224    32     
-80    176    
320    64     
16     336    
624    256    
-16    -176   
32     64     
0      -80    
416    128    
48     -160   
16     -48    
368    -16    
-288   -16    
128    -64    
288    352    
-384   -496   
-32    -32    
80     -368   
192    368    
160    64     
176    -144   
-32    272    
192    224    
16     -96    
192    176    
0      128    
96     1200   
-160   -192   
-288   -1696  
288    688    
-240   -96    
240    0      
-112   -16    
224    -176   
128    -2256  
-288   -384   
576    -96    
-48    528    
32     240    
-48    -64    
16     -240   
224    -128   
0      544    
288    -32    
112    -288   
64     -176   
0      16     
224    -144   
112    -272   
128    -144   
32     -96    
176    -240   
-256   -368   
32     -608   
48     -192   
32     144    
-64    -320   
64     -592   
16     192    
16     -80    
80     -16    
-16    -288   
-48    -272   
-384   32     
64     336    
176    208    
0      -48    
16     -80    
32     -592   
0      0      
128    -16    
-112   64     
32     48     
64     0      
-48    -48    
96     -208   
-80    -240   
208    -80    
-128   64     
176    -96    
-64    -160   
96     -112   
256    144    
-48    -160   
160    336    
80     -560   
48     176    
96     -112   
304    176    
-48    80     
16     16     
-80    -96    
96     -16    
-32    16     
48     -176   
-416   32     
208    -144   
-16    -16    
96     -128   
32     -96    
192    -752   
-304   0      
240    -448   
48     48     
16     -112   
32     112    
80     32     
-256   -16    
-208   -160   
48     32     
16     -128   
-32    96     
48     -96    
208    64     
-32    80     
-64    -208   
-32    -16    
192    112    
64     64     
48     -80    
16     -64    
48     48     
144    -80    
-96    -80    
160    -128   
-64    80     
144    -112   
160    -112   
144    -224   
64     16     
144    -64    
32     48     
32     -128   
-128   0      
192    0      
48     -80    
-144   192    
32     240    
-224   160    
0      64     
-240   32     
-112   16     
-336   64     
96     96     
16     -64    
16     -240   
176    0      
0      -832   
-128   32     
-240   -32    
-32    208    
-64    -32    
-32    -80    
-288   -16    
32     64     
-16    -32    
128    -144   
-32    -160   
16     48     
240    96     
32     -112   
-16    96     
32     -160   
-96    96     
128    -112   
-176   -32    
-16    80     
112    -32    
-80    -32    
112    -48    
48     80     
-128   -192   
-288   -272   
288    -144   
-352   176    
-176   -224   
64     176    
272    -128   
-672   -16    
64     -16    
-1136  -96    
16     128    
-192   -32    
-112   48     
336    -64    
336    752    
-288   272    
-272   -64    
-1712  -256   
144    48     
-1008  -384   
192    -16    
112    -48    
-304   -32    
-288   -144   
-96    32     
80     224    
-272   80     
96     32     
48     32     
-128   64     
-96    -160   
-16    0      
-208   32     
-160   0      
224    160    
-128   96     
64     32     
-80    16     
0      -64    
-16    96     
32     96     
-272   16     
-96    32     
-864   -128   
144    32     
-96    0      
160    112    
16     16     
0      96     
-112   -192   
96     -16    
16     -32    
-16    0      
64     144    
80     208    
-320   144    
-192   96     
-64    -16    
-448   16     
-160   -96    
48     -192   
48     128    
48     -96    
0      80     
-96    -96    
-16    64     
48     64     
-48    32     
48     16     
16     16     
-112   16     
48     32     
32     208    
-160   112    
-32    -64    
16     -32    
144    128    
-208   -112   
160    176    
-192   64     
64     288    
240    96     
-208   -16    
64     96     
-64    32     
-128   -272   
320    336    
-128   32     
64     32     
-96    48     
-224   -16    
16     224    
-16    -16    
64     128    
80     16     
-96    -64    
-48    -32    
0      -32    
-64    -96    
64     48     
16     -160   
-288   -736   
272    -128   
-240   528    
-224   -32    
-480   -848   
96     656    
-928   -80    
-64    -96    
128    96     
-96    48     
-16    32     
32     80     
-16    64     
64     48     
-16    80     
-16    16     
-64    0      
352    432    
-320   1008   
-96    -576   
448    304    
-768   432    
32     -288   
-48    -16    
16     0      
0      64     
96     144    
176    192    
-256   -144   
336    -48    
-288   192    
208    32     
64     240    
0      448    
-288   -304   
208    48     
32     304    
-64    112    
-80    -32    
0      64     
80     128    
0      352    
-160   80     
16     -384   
-32    144    
80     64     
32     96     
-96    272    
-80    160    
-48    48     
-272   -256   
64     -144   
-144   -160   
0      -240   
64     -16    
-32    352    
144    96     
-32    240    
96     64     
16     64     
0      48     
80     368    
-144   -80    
-48    32     
-80    0      
32     -16    
48     80     
16     96     
48     96     
-64    16     
80     368    
256    0      
-192   -192   
112    -160   
-240   -80    
-48    -16    
-80    48     
-96    -128   
272    336    
-96    224    
-32    112    
176    96     
-48    144    
64     0      
-48    -16    
112    -48    
-288   -96    
-144   -256   
-224   -160   
176    176    
-288   -176   
64     272    
-80    16     
-240   -48    
-224   144    
80     80     
0      224    
-272   -368   
-16    64     
112    64     
-240   -432   
112    288    
-80    304    
0      -64    
16     96     
32     160    
-128   32     
-16    64     
-80    -48    
352    400    
-544   80     
400    48     
-192   240    
416    16     
16     112    
0      176    
128    112    
128    208    
-192   -512   
0      -64    
-144   352    
48     736    
-16    -464   
-48    240    
64     64     
144    176    
-80    -80    
448    368    
-160   176    
144    112    
240    384    
-144   -144   
240    -256   
-208   -288   
288    224    
176    496    
-240   -32    
64     -160   
-128   -592   
-224   -512   
144    -672   
-112   336    
-16    336    
48     304    
304    416    
-224   352    
-176   -48    
304    128    
48     48     
96     80     
368    528    
224    464    
-80    128    
16     -192   
112    16     
64     -112   
96     240    
272    192    
-192   48     
96     144    
64     144    
0      64     
-112   112    
32     -32    
32     32     
-16    208    
80     288    
32     -16    
-80    -352   
-16    -304   
-16    -352   
160    240    
-64    304    
32     32     
48     16     
96     0      
-48    -576   
0      192    
240    32     
-48    64     
-80    80     
-208   -240   
-16    -16    
32     -240   
64     112    
16     0      
64     176    
-96    -768   
128    192    
144    -176   
32     208    
-16    32     
-16    96     
144    96     
-80    48     
32     16     
16     -64    
-16    64     
192    32     
32     96     
80     -16    
-80    224    
352    -240   
-48    80     
-16    -640   
112    48     
-64    32     
352    384    
-304   0      
144    96     
512    416    
-432   32     
224    -16    
-176   48     
208    144    
-96    -144   
64     176    
128    -112   
96     208    
-16    -96    
32     80     
160    48     
-16    80     
48     -16    
96     96     
96     64     
48     -80    
96     80     
-16    -240   
64     176    
160    48     
-176   96     
80     48     
128    96     
-32    -144   
48     80     
-16    -32    
48     -32    
64     80     
176    176    
-64    64     
96     -48    
64     80     
32     -128   
80     80     
96     64     
112    128    
16     -112   
112    16     
0      -336   
160    112    
-16    -112   
-32    -160   
352    -32    
-32    0      
176    -576   
32     -80    
208    -1712  
-32    -32    
288    96     
-144   -160   
256    128    
-128   -16    
144    272    
32     80     
48     208    
96     176    
-80    -448   
32     -352   
-1152  -96    
304    176    
16     64     
0      32     
64     -192   
176    -480   
-96    -112   
16     -16    
-32    -272   
128    -128   
16     96     
144    -144   
48     64     
160    0      
-176   -208   
-176   48     
64     -32    
16     16     
112    -192   
80     32     
96     -176   
0      64     
112    256    
48     48     
112    64     
-16    80     
304    208    
-288   240    
-192   -128   
-48    -208   
-208   -32    
-64    -144   
176    -80    
-16    -160   
48     -160   
-32    -288   
16     -112   
96     -544   
240    208    
-336   -208   
272    176    
-48    96     
-80    48     
-16    32     
64     48     
-160   -144   
32     -384   
-400   -48    
272    32     
-96    -176   
288    272    
-192   128    
48     -416   
-32    288    
112    -768   
-128   32     
48     -96    
64     -16    
112    160    
-112   -48    
-48    -80    
256    -80    
-288   48     
128    -16    
-208   16     
128    64     
80     -48    
32     -400   
160    80     
32     -848   
128    -128   
-112   80     
208    -32    
-336   -64    
0      -208   
48     32     
-144   0      
-32    -96    
-32    -288   
-912   -112   
80     -144   
-1440  16     
112    -96    
-208   -32    
32     -208   
128    48     
192    32     
0      -80    
-272   -80    
208    144    
-160   32     
144    128    
-336   0      
48     0      
-480   -224   
-128   -304   
32     -112   
-64    16     
176    672    
48     -240   
112    176    
-160   96     
0      16     
48     64     
208    240    
-208   368    
16     -176   
0      -32    
144    -16    
-224   -64    
192    96     
32     240    
96     224    
32     -352   
-32    -80    
-64    -96    
-128   192    
32     -288   
-144   -112   
384    80     
-304   -224   
160    16     
-208   -48    
144    16     
-160   -48    
224    16     
-32    -16    
-240   80     
-192   64     
-384   336    
-32    -80    
-48    -368   
-144   -16    
-16    336    
304    -32    
-384   -16    
304    64     
-112   32     
32     48     
-80    48     
-176   -64    
16     48     
0      -32    
64     80     
-32    48     
-448   96     
112    -48    
-608   -80    
-32    48     
-208   -144   
-176   144    
-656   -64    
-144   16     
224    0      
176    336    
-480   240    
176    -48    
224    -48    
-240   128    
80     -16    
-304   -96    
128    16     
-256   48     
112    96     
16     0      
48     96     
-1392  -112   
-240   -144   
176    -96    
64     160    
-16    -96    
48     -32    
0      -192   
-112   64     
0      64     
80     272    
-224   -80    
-208   -304   
-144   -720   
-48    -576   
-240   -416   
176    -608   
48     -128   
-304   112    
80     96     
32     0      
96     144    
-144   -128   
-320   -528   
-16    -288   
144    224    
-128   64     
-32    -16    
-96    48     
-32    48     
0      80     
-96    32     
144    288    
-464   -304   
64     -272   
-128   32     
32     128    
96     192    
-48    176    
48     32     
-48    -128   
-128   -80    
-64    -176   
208    -304   
32     768    
16     272    
-160   -400   
-16    48     
336    336    
-224   768    
-288   16     
128    -512   
736    432    
-384   448    
48     -96    
176    32     
96     -16    
64     128    
256    16     
176    288    
-432   -128   
80     -272   
-48    32     
-192   160    
512    768    
-816   784    
-288   -432   
112    -192   
-208   208    
-96    -144   
-80    96     
208    576    
-272   320    
32     320    
-112   -208   
0      -48    
-32    -128   
64     -80    
-128   48     
-16    80     
-544   -256   
-64    -16    
384    544    
-416   240    
176    128    
-16    160    
144    80     
-192   -32    
144    -16    
64     -80    
-64    192    
96     48     
-112   80     
-96    16     
0      -208   
-64    -64    
96     144    
-224   -128   
304    -32    
32     144    
48     16     
-16    32     
80     128    
-160   160    
48     64     
-80    -48    
48     0      
-32    144    
-64    64     
-80    32     
112    0      
16     0      
-144   -96    
288    -112   
-48    128    
288    -64    
-304   96     
288    112    
144    224    
-256   80     
112    32     
-80    -48    
192    32     
-304   -64    
64     96     
128    144    
64     16     
-48    32     
64     64     
-48    32     
48     144    
48     0      
48     -16    
112    224    
48     -96    
64     112    
-96    32     
32     -32    
0      -64    
384    480    
-288   224    
0      0      
-64    -16    
224    16     
16     96     
-80    32     
160    112    
-144   48     
64     208    
112    160    
-272   -48    
160    16     
32     208    
32     0      
32     112    
16     64     
0      32     
0      80     
192    112    
-112   16     
96     32     
64     16     
-96    -96    
160    192    
80     32     
-16    -48    
64     16     
192    176    
16     80     
32     144    
-240   -96    
432    -16    
-208   32     
160    48     
-16    -32    
0      80     
80     96     
-144   -208   
112    64     
160    64     
-64    112    
-32    -240   
-48    -656   
304    160    
-240   128    
96     48     
32     64     
80     48     
128    48     
-48    144    
80     0      
256    320    
-160   16     
16     240    
128    -192   
32     176    
-176   -48    
16     16     
96     -144   
0      -48    
48     32     
-96    32     
176    128    
-16    80     
-16    192    
272    160    
-112   176    
-48    -128   
48     176    
80     -192   
-240   208    
224    -176   
-224   -256   
128    160    
192    -432   
-96    32     
144    112    
-48    80     
-32    96     
128    256    
64     144    
96     0      
-304   -160   
384    96     
-144   48     
256    192    
-64    64     
0      -32    
160    112    
0      -128   
256    80     
-160   -368   
-80    -16    
96     32     
16     64     
-16    -48    
-80    16     
96     48     
112    176    
-48    96     
400    240    
-400   144    
128    -96    
96     80     
16     -48    
80     16     
-16    -80    
240    128    
48     128    
64     64     
80     16     
288    304    
-192   64     
176    112    
-128   32     
160    -112   
-32    96     
-48    -96    
224    80     
48     -128   
-32    -112   
-48    -1472  
80     96     
32     -1440  
80     32     
16     64     
48     48     
80     0      
96     96     
176    48     
-32    48     
576    480    
-384   64     
160    112    
-208   -304   
96     -16    
304    -80    
-64    320    
-16    224    
-160   224    
224    16     
80     160    
240    176    
-464   -432   
400    -256   
320    -160   
32     160    
0      -224   
176    224    
64     -80    
32     -160   
128    -160   
176    208    
32     256    
-96    160    
64     -80    
208    176    
16     64     
48     96     
-80    80     
144    -416   
-256   -32    
256    -208   
-144   144    
0      -112   
80     112    
48     -80    
-32    128    
-64    16     
-64    -336   
208    336    
64     -272   
-16    64     
32     -48    
160    -576   
112    -80    
-16    -1152  
-64    -32    
144    112    
-112   -96    
-144   80     
112    -352   
-48    -1424  
144    80     
96     64     
-48    176    
128    -352   
112    -48    
-928   368    
-208   -832   
640    -528   
-320   -80    
256    0      
80     -752   
-32    -80    
32     48     
48     128    
48     -384   
112    -48    
224    592    
-176   192    
144    -272   
96     -224   
-32    176    
128    -48    
-48    -96    
192    0      
-240   -496   
96     -864   
32     0      
-32    -1680  
112    96     
64     48     
-64    112    
16     0      
336    192    
-416   144    
160    16     
-128   -32    
240    288    
384    160    
-320   64     
240    -288   
144    16     
-16    -144   
96     -16    
144    128    
0      -80    
112    64     
-128   -48    
224    -32    
-96    48     
64     16     
0      48     
80     -208   
-640   -16    
-144   -304   
96     -16    
-64    64     
192    -80    
-112   -352   
160    0      
-16    -1680  
208    128    
16     128    
-32    -208   
96     -320   
-48    -208   
-48    -112   
-384   -32    
224    192    
-144   224    
-1216  -80    
80     -192   
32     -112   
80     -240   
64     112    
64     -1472  
304    192    
-192   144    
176    -96    
-16    -80    
96     -80    
-32    -32    
96     16     
-16    -32    
160    80     
-400   192    
-192   32     
336    224    
64     736    
-48    768    
160    240    
0      0      
16     -96    
64     -64    
-416   -80    
80     -112   
-192   112    
192    272    
-112   -64    
32     -80    
-208   144    
-112   -352   
224    64     
-64    0      
16     80     
176    -464   
-16    368    
-512   96     
-160   -816   
352    256    
-144   352    
32     -400   
256    112    
-304   272    
224    -176   
-208   496    
176    752    
-304   32     
256    -384   
-64    -176   
176    -560   
-96    -160   
-16    48     
128    160    
-64    16     
160    48     
32     512    
-80    528    
-16    112    
32     432    
-16    128    
-800   48     
16     224    
-992   -80    
-96    -32    
-816   -400   
-80    -176   
112    16     
-464   -480   
-272   -384   
-1312  96     
-272   224    
-16    160    
-64    128    
224    96     
-176   -160   
288    -16    
-336   -416   
0      -256   
240    128    
-16    96     
-48    -16    
-160   64     
-176   48     
-112   0      
-240   32     
80     -48    
-1168  272    
-64    -128   
-816   -112   
224    48     
-128   -32    
-32    0      
-16    -16    
-48    -176   
-208   176    
208    -224   
-160   112    
16     64     
-64    32     
160    32     
272    144    
-480   16     
48     48     
-304   -208   
-16    176    
-160   -240   
288    80     
-80    -16    
-80    -48    
16     64     
-32    0      
0      64     
-160   112    
32     -16    
-16    64     
48     128    
16     144    
-480   64     
-480   32     
192    224    
-16    0      
-64    16     
-80    48     
-48    64     
-192   16     
128    128    
64     32     
-112   -16    
-96    48     
-224   -96    
-80    32     
-96    48     
0      64     
-592   -32    
144    -32    
-96    -272   
208    48     
32     112    
224    96     
-192   48     
176    176    
-240   96     
16     176    
192    112    
-224   112    
-16    96     
-48    0      
-48    -32    
-384   16     
96     128    
-160   -80    
80     96     
-80    -16    
48     96     
112    80     
-80    -32    
-48    64     
32     32     
112    16     
-80    80     
32     64     
-176   32     
-16    96     
-384   -160   
80     176    
-1008  144    
272    32     
-144   48     
96     48     
64     80     
0      48     
48     80     
16     96     
-64    144    
-304   -368   
128    -144   
-80    -48    
-32    160    
0      -80    
0      0      
80     304    
320    288    
-416   64     
192    208    
160    0      
-192   -32    
48     64     
112    96     
-80    -80    
-48    -112   
16     48     
96     -32    
-96    48     
112    -64    
-112   -16    
176    48     
-16    112    
96     64     
32     48     
32     -16    
96     128    
0      224    
-80    112    
64     64     
-32    32     
96     192    
-160   16     
16     144    
-96    -16    
-64    -16    
16     96     
16     -32    
112    64     
0      32     
176    -32    
-160   208    
80     48     
-304   112    
288    112    
-288   32     
-16    224    
-96    -48    
0      80     
64     -48    
-16    -48    
160    0      
-16    112    
48     64     
16     -80    
-96    48     
16     176    
16     112    
80     80     
240    48     
-448   32     
192    48     
-96    16     
96     80     
128    272    
-128   80     
112    0      
80     -48    
-80    80     
-144   -16    
112    -32    
48     -16    
-48    48     
80     176    
-16    112    
-176   -64    
128    128    
-32    64     
-80    48     
16     96     
-16    32     
64     176    
-128   48     
-48    -80    
-208   -544   
208    80     
-144   176    
-176   -160   
-128   0      
-80    64     
-160   -112   
80     16     
-48    -224   
160    -1472  
32     96     
112    160    
-64    -32    
144    96     
176    192    
-176   144    
416    800    
-160   1200   
-144   464    
-16    64     
-16    208    
-48    0      
-32    96     
-48    -160   
48     -16    
48     640    
192    192    
336    688    
-128   752    
16     576    
-48    256    
48     144    
-160   -112   
48     0      
-32    176    
-64    80     
48     144    
-64    144    
32     48     
-16    -80    
224    128    
-208   -368   
192    -80    
-48    224    
176    -112   
-48    -224   
320    272    
-192   336    
144    -64    
-160   -576   
192    256    
-192   176    
240    -304   
96     128    
144    432    
-80    -144   
-32    -1056  
320    240    
-128   64     
240    -96    
80     208    
432    112    
-80    272    
-176   -240   
0      -176   
112    384    
32     -112   
128    0      
0      288    
-64    -112   
-96    -64    
-64    -144   
320    48     
-208   80     
80     32     
240    -144   
-80    96     
64     80     
160    48     
-48    16     
160    256    
-144   112    
288    -208   
-48    112    
-16    -352   
48     448    
224    272    
80     16     
-304   -1056  
96     -432   
-64    144    
-144   -208   
320    16     
-288   560    
400    624    
160    576    
160    176    
64     0      
-32    400    
80     64     
-80    -352   
32     -224   
-48    -192   
32     -720   
32     -336   
0      -1216  
160    48     
-48    112    
16     -160   
320    16     
-32    96     
-48    64     
224    -320   
-48    16     
96     -128   
-16    80     
48     -304   
16     48     
0      -80    
64     80     
48     -16    
304    96     
-304   96     
272    -16    
-176   192    
0      -608   
64     -176   
128    -80    
48     64     
144    -32    
64     560    
64     -64    
-160   96     
32     -64    
-144   -64    
0      16     
112    -64    
-192   -96    
144    -1104  
-80    64     
16     -160   
0      -464   
80     64     
-16    -1104  
160    0      
144    544    
0      -448   
0      800    
-48    -528   
64     -560   
-16    48     
32     -528   
-48    -288   
272    -384   
32     400    
384    672    
32     -1248  
64     160    
-96    -688   
240    -240   
-16    336    
256    64     
-48    304    
48     96     
80     320    
48     -176   
16     -48    
-32    160    
16     -64    
96     48     
-1760  -96    
0      -208   
112    -224   
-48    -448   
32     -64    
-16    -224   
320    -32    
32     176    
-64    -48    
16     16     
80     144    
48     -144   
-64    -96    
192    -64    
288    96     
-448   -16    
112    32     
128    80     
-16    0      
-32    -16    
-80    -416   
128    -32    
16     -1008  
-144   -272   
528    0      
-320   128    
272    -400   
16     -16    
80     0      
-16    -112   
-48    64     
112    64     
-336   208    
16     32     
-128   -80    
112    -272   
0      64     
176    -176   
-240   32     
256    0      
48     32     
96     -32    
48     -64    
16     -32    
400    560    
-352   368    
48     -176   
-1104  -128   
192    -192   
96     16     
-160   32     
16     144    
64     -400   
32     144    
112    -2176  
-192   176    
-80    -96    
16     96     
-80    0      
-48    -32    
-208   80     
304    160    
-496   32     
16     80     
-432   -32    
192    32     
48     0      
0      -96    
224    -64    
-128   -560   
144    144    
-128   16     
96     -112   
-96    32     
-208   -496   
-128   -544   
304    -112   
-288   -192   
32     16     
-256   80     
64     -112   
176    176    
-96    -112   
0      64     
16     -144   
128    32     
-432   48     
432    -64    
-240   32     
432    80     
-368   -32    
256    -80    
-272   -192   
192    -336   
-176   -112   
80     -112   
32     128    
-208   -208   
112    48     
112    -336   
-128   0      
-128   48     
-48    16     
-144   112    
176    32     
-128   48     
-16    -16    
-96    48     
336    64     
-352   48     
128    80     
64     32     
-240   -32    
32     144    
-1504  -112   
-1248  -64    
64     160    
-704   -16    
-128   96     
-48    -144   
-128   -128   
176    192    
112    -16    
-64    -192   
-80    80     
-224   -16    
-112   80     
-224   -112   
176    80     
-112   80     
-192   -96    
128    48     
32     224    
-336   80     
-784   -416   
64     0      
112    -32    
48     144    
64     0      
-96    -80    
-464   -288   
32     80     
-32    -160   
160    144    
-192   48     
48     16     
112    96     
16     16     
-32    224    
208    48     
-224   -16    
272    192    
-288   -112   
-96    -96    
192    176    
-240   -16    
96     64     
0      0      
96     80     
-128   -64    
-96    -144   
48     0      
-48    80     
32     256    
32     80     
64     112    
-128   -96    
-160   0      
-16    -112   
16     96     
16     -16    
96     128    
-80    80     
-80    80     
-112   16     
-96    96     
-48    -16    
-80    -16    
80     32     
-96    0      
-160   -96    
-112   -112   
16     -48    
-400   16     
0      32     
-32    0      
-16    64     
-64    -16    
0      -64    
-112   -144   
48     -32    
-32    128    
144    80     
-240   -16    
144    64     
432    512    
-288   352    
-112   16     
-16    -48    
64     176    
-16    -192   
208    240    
-128   48     
-80    64     
80     80     
16     96     
16     0      
-144   -80    
112    336    
32     336    
-48    208    
-64    144    
-80    400    
-112   192    
-16    224    
112    -240   
0      -144   
16     -16    
48     -64    
160    112    
-128   -32    
-16    192    
0      112    
112    368    
0      304    
-80    -288   
-192   -96    
96     304    
-800   -528   
144    256    
-1232  -176   
192    176    
-64    320    
48     -144   
144    64     
-48    64     
112    128    
16     32     
64     48     
48     336    
-64    -96    
-64    -96    
-48    128    
-96    -64    
32     240    
-48    112    
-32    64     
-16    -176   
224    -80    
-96    176    
352    384    
-112   224    
-48    -208   
32     64     
-96    16     
96     -96    
-128   160    
192    -48    
-336   160    
112    -128   
-32    16     
80     96     
-16    -208   
32     208    
-48    64     
-80    -400   
-80    96     
-112   160    
96     512    
48     320    
48     432    
-464   -176   
176    -144   
-336   576    
-144   -176   
64     144    
-32    384    
80     -144   
128    256    
-192   0      
-96    -304   
144    736    
16     176    
128    -544   
-192   256    
-32    128    
-96    -112   
272    400    
240    624    
-144   400    
208    16     
48     288    
-160   352    
-304   -176   
160    -640   
-208   16     
80     0      
96     208    
160    192    
-256   -48    
480    256    
-400   0      
-80    112    
272    48     
-48    128    
144    96     
-16    224    
-144   -496   
-128   -224   
320    128    
80     736    
-112   240    
-48    -528   
64     320    
-96    192    
-16    -96    
0      256    
320    -928   
-384   -112   
176    -192   
32     384    
16     1088   
48     -848   
-64    112    
176    128    
-96    -48    
192    384    
-144   -288   
-64    -352   
224    320    
80     1040   
-16    800    
-144   -368   
192    -800   
-192   -272   
464    -16    
-384   112    
352    112    
-112   144    
240    64     
-176   16     
96     96     
-96    -32    
96     144    
-32    -16    
112    80     
-80    32     
320    -496   
-352   224    
352    400    
-32    -160   
160    48     
112    240    
-32    224    
-16    -160   
176    16     
-160   -48    
48     -448   
-16    352    
16     48     
352    352    
-256   -160   
144    -352   
0      160    
0      -592   
176    -112   
-96    -64    
256    448    
64     304    
176    112    
0      64     
48     144    
-16    -288   
80     -64    
-64    -192   
-48    -224   
144    288    
272    384    
-176   320    
176    448    
-32    176    
32     80     
80     48     
-16    -48    
112    64     
48     272    
0      320    
-128   80     
-64    288    
64     64     
256    240    
144    240    
16     -64    
16     144    
16     -528   
80     176    
-112   -1488  
-48    128    
176    16     
-96    80     
-16    96     
0      160    
-160   48     
0      144    
-80    -64    
112    -112   
-32    80     
-48    -160   
0      48     
16     -176   
256    -16    
128    -480   
48     176    
80     48     
0      64     
96     96     
16     16     
48     -48    
-64    96     
48     160    
32     -112   
-256   128    
192    112    
-64    144    
208    48     
0      16     
-96    -448   
288    80     
-144   -288   
160    128    
-176   32     
80     0      
-64    0      
96     -928   
-32    112    
16     -80    
80     256    
-80    -64    
192    320    
-224   -112   
96     64     
-16    -528   
-240   64     
320    -464   
-96    288    
144    112    
-16    64     
80     -272   
0      32     
128    240    
192    128    
-64    -80    
-240   -176   
64     176    
96     -64    
272    160    
0      176    
256    256    
192    -160   
144    -2256  
160    -48    
80     -944   
-112   -896   
176    -32    
128    -288   
80     32     
-96    -368   
160    -32    
368    32     
-208   -400   
112    -144   
176    144    
48     64     
-160   0      
80     -64    
0      -64    
112    -208   
144    -224   
-896   32     
-64    -272   
0      -160   
176    -560   
-48    -96    
96     -1632  
128    0      
-128   -16    
224    -224   
112    -160   
-80    16     
0      -192   
288    -80    
-128   176    
192    -16    
-1488  -80    
160    -64    
160    32     
-64    -160   
32     -80    
32     16     
400    48     
-32    -1024  
80     -96    
32     32     
112    96     
-48    -144   
-112   -128   
48     -320   
48     -240   
16     64     
32     -48    
-32    64     
32     -192   
80     96     
160    -272   
-144   -32    
16     -1088  
-16    -128   
80     -16    
80     80     
-176   -96    
288    -32    
-192   -192   
240    -64    
-336   16     
-48    16     
-1248  96     
-16    -16    
-32    -96    
96     -224   
-112   -48    
16     -528   
64     128    
80     -80    
144    -16    
128    -80    
96     128    
-48    208    
-160   64     
208    208    
32     0      
-464   -32    
-16    -128   
-944   -16    
224    32     
-160   -112   
336    -80    
-128   144    
144    -672   
-32    16     
48     0      
96     144    
-96    -32    
48     0      
-64    -160   
48     -128   
-224   -128   
96     -224   
-80    176    
48     48     
-288   96     
256    -48    
-80    192    
160    352    
48     416    
-176   176    
144    -32    
-176   -80    
-64    -272   
-320   96     
16     -32    
-160   48     
96     32     
48     -48    
0      -320   
32     112    
96     -32    
-80    32     
-128   -384   
144    16     
48     256    
112    432    
-192   80     
96     -48    
-192   -32    
128    -16    
-32    96     
-16    96     
-816   -192   
128    -208   
-16    176    
160    736    
96     -112   
-144   -272   
-48    256    
-272   288    
48     16     
-96    -64    
192    -256   
48     288    
16     -208   
-64    96     
64     -128   
-240   272    
-240   -160   
64     32     
-480   -160   
144    -112   
-144   -304   
-576   240    
144    48     
-528   -16    
-144   -96    
64     -32    
-96    -80    
240    64     
-48    336    
-416   432    
16     256    
-112   160    
-80    -240   
-576   -624   
-64    288    
-144   -144   
-32    32     
320    -16    
-608   -512   
240    128    
-64    480    
-96    -64    
112    -32    
32     32     
96     -32    
144    -112   
-64    -240   
240    192    
-80    176    
-208   80     
-128   208    
272    -32    
80     336    
-480   -32    
224    -112   
-80    80     
-96    352    
-16    112    
-80    144    
-368   32     
-208   -160   
-80    -368   
64     96     
-32    -64    
-80    112    
80     80     
-80    96     
32     -144   
-208   -16    
192    0      
-240   48     
-304   -688   
-144   224    
16     304    
-416   -400   
96     0      
-32    16     
208    48     
-96    -208   
80     -48    
-224   544    
128    -192   
-64    -112   
-160   432    
320    -384   
64     352    
80     -48    
352    496    
80     256    
-208   288    
96     -432   
-32    -480   
320    448    
-208   64     
-48    -320   
240    32     
-320   352    
256    -448   
-192   160    
464    112    
-592   -208   
448    -352   
-80    1136   
-16    -128   
144    -160   
224    800    
-32    992    
-224   -448   
32     -208   
-128   -64    
144    320    
128    128    
-208   32     
320    64     
-368   -64    
144    112    
-336   48     
160    336    
-160   16     
-112   240    
-224   32     
-32    -80    
-352   -768   
32     432    
160    -320   
-64    -32    
96     384    
80     64     
128    352    
-32    96     
-96    -256   
272    400    
-176   128    
32     32     
-96    -32    
80     16     
-208   -16    
160    -624   
80     448    
192    464    
-160   -384   
32     -32    
-16    160    
-16    16     
-128   48     
-32    96     
48     272    
-176   32     
208    112    
-240   -32    
128    80     
32     80     
32     -16    
-32    64     
-64    0      
208    -128   
-272   -272   
160    -80    
16     128    
-80    -16    
32     240    
-80    288    
-208   16     
64     176    
-224   -176   
128    16     
-48    -96    
128    48     
-32    160    
-208   -64    
144    -272   
48     96     
80     64     
-176   0      
176    112    
-176   64     
-32    160    
32     32     
48     96     
0      64     
-48    64     
-48    -16    
128    0      
48     32     
160    -64    
0      96     
80     128    
-16    0      
-80    48     
96     48     
112    160    
-208   64     
0      -16    
32     80     
112    96     
-80    16     
80     48     
-176   -48    
144    112    
-80    -48    
96     -64    
0      208    
16     240    
16     192    
160    112    
-32    -16    
80     32     
-32    -144   
240    -64    
112    80     
224    16     
64     32     
32     80     
-64    -64    
112    0      
80     48     
0      16     
64     96     
144    48     
-176   -32    
-80    208    
144    48     
-112   48     
16     -96    
96     112    
32     208    
-96    112    
-96    32     
112    208    
-144   32     
0      -160   
0      80     
-112   -64    
-80    -32    
-48    112    
-256   -96    
176    160    
144    256    
-96    -640   
208    64     
-80    -48    
192    -224   
64     -16    
160    208    
48     48     
-96    -64    
208    160    
-32    208    
-112   -16    
0      32     
336    144    
336    384    
16     272    
112    -816   
96     144    
176    336    
144    160    
160    16     
272    224    
64     16     
-176   -272   
160    -352   
352    -128   
32     -176   
272    48     
112    0      
176    -304   
-64    -336   
-48    -400   
16     -256   
-224   -240   
128    -64    
-224   32     
-16    48     
80     80     
-144   80     
-144   -112   
368    192    
48     96     
112    16     
-416   -16    
320    -112   
-32    112    
144    -112   
112    128    
-160   16     
96     144    
-16    400    
256    128    
-80    -208   
-304   -32    
144    -32    
144    160    
-160   -16    
-80    16     
128    192    
32     -32    
-96    64     
96     -128   
160    -64    
16     -96    
176    128    
16     -176   
16     -32    
176    80     
16     96     
112    112    
-16    64     
64     16     
256    176    
112    96     
16     48     
112    32     
0      -208   
0      -32    
64     -112   
192    128    
32     160    
32     112    
48     -1632  
128    48     
-16    48     
32     80     
-48    112    
16     0      
144    16     
64     -144   
160    -48    
-192   -752   
160    128    
192    -96    
16     80     
-80    -256   
-16    48     
-16    -768   
208    160    
144    16     
-16    64     
-32    80     
-80    -464   
128    -192   
128    -32    
-256   -80    
32     -80    
256    128    
80     -96    
-160   112    
176    -240   
-32    80     
144    112    
16     96     
112    96     
64     -1296  
400    384    
-352   144    
160    544    
-48    -272   
304    560    
-32    128    
16     -224   
112    -240   
48     -16    
112    208    
144    -32    
-64    96     
224    272    
-80    -80    
176    -64    
-96    -560   
64     -160   
64     -496   
64     224    
-32    -1792  
208    -224   
16     144    
48     -80    
256    80     
32     784    
80     -592   
80     224    
128    -400   
0      -48    
-192   64     
304    96     
-384   80     
160    -208   
416    48     
256    864    
144    592    
-192   -832   
144    -528   
176    160    
64     192    
80     -496   
0      48     
48     -224   
48     -64    
-144   -192   
64     -224   
-240   96     
80     -160   
32     -64    
64     -128   
64     16     
32     -48    
368    160    
-64    -1568  
-128   -64    
-48    -64    
-16    -80    
48     48     
-16    -128   
-208   -32    
112    224    
-592   112    
-32    48     
-432   -192   
-592   -1008  
624    -352   
-208   -336   
208    80     
64     -992   
128    288    
-96    144    
272    128    
48     -64    
-96    256    
0      -176   
-32    -448   
-192   -272   
-96    -128   
-352   336    
-160   -112   
352    -320   
-480   -384   
272    -272   
-112   192    
128    416    
32     0      
-64    -592   
112    -160   
48     -256   
-16    96     
-64    -176   
-224   -112   
160    32     
-256   432    
-64    -208   
-64    -208   
-240   -336   
160    -80    
-176   -304   
416    -32    
112    -224   
-48    384    
-96    -80    
-128   80     
208    -272   
-384   -352   
128    -272   
-64    32     
-208   -96    
64     224    
-416   -368   
416    -224   
-272   80     
96     -432   
-144   1184   
288    -1376  
-176   144    
144    -128   
240    272    
-192   -128   
384    -48    
-160   448    
-208   -384   
-16    272    
256    -400   
64     96     
160    -32    
192    112    
96     -464   
112    -16    
112    -400   
144    496    
16     -368   
320    -464   
-16    640    
64     -160   
32     224    
144    -80    
-80    -32    
48     -112   
64     48     
144    208    
48     0      
-176   -176   
256    144    
-176   -16    
-1440  -32    
-208   80     
256    -144   
0      -128   
-128   400    
96     144    
-160   16     
80     224    
-96    112    
48     208    
-1616  -16    
176    128    
336    -32    
-352   -224   
96     -176   
-464   -304   
-16    -192   
-320   -96    
-16    -32    
-80    688    
-80    176    
-176   0      
-48    -176   
-528   -48    
32     48     
-32    -128   
240    16     
-144   -432   
-48    -224   
-176   -64    
80     -16    
-80    32     
-32    160    
32     64     
-464   -80    
192    416    
-256   32     
32     -160   
32     -176   
80     16     
-32    -64    
112    160    
-96    -48    
-16    80     
32     128    
16     224    
-304   80     
96     -64    
-96    32     
-144   -48    
-128   32     
128    160    
-112   128    
-80    0      
0      0      
-32    -80    
-80    160    
256    288    
-336   -32    
176    160    
0      16     
-64    -96    
-48    32     
208    240    
-304   320    
-48    192    
-320   32     
-128   16     
-64    -208   
176    80     
-80    -48    
80     -16    
64     48     
128    128    
-208   80     
32     -48    
-64    -16    
-64    64     
96     160    
-16    32     
32     112    
-64    -16    
48     96     
-320   -16    
176    176    
-32    -32    
16     80     
-144   -96    
16     0      
-48    48     
-48    32     
0      144    
-32    96     
96     112    
-256   48     
48     32     
-288   -160   
16     32     
64     -96    
16     16     
-64    -192   
-64    112    
32     128    
-16    -224   
-240   -400   
128    48     
160    576    
0      272    
160    48     
32     64     
-192   32     
-96    -96    
112    144    
-160   0      
112    240    
-48    -96    
80     160    
128    128    
-112   -32    
144    16     
64     32     
-32    32     
-208   -16    
64     32     
-64    -48    
48     -16    
48     -16    
-128   -16    
64     -32    
16     192    
-16    64     
0      96     
272    368    
-224   272    
-112   112    
112    32     
-144   -192   
-176   80     
48     0      
-208   -64    
48     144    
-160   -64    
64     96     
-64    0      
48     112    
-144   0      
-160   -48    
464    -240   
-112   80     
224    16     
-80    -80    
176    80     
64     160    
-80    192    
-144   -64    
80     -16    
-64    16     
-128   0      
80     32     
32     128    
-16    16     
0      80     
-80    -96    
-16    -48    
192    176    
-320   -288   
576    64     
-288   -16    
272    0      
-96    80     
224    80     
-240   -96    
208    176    
-80    32     
208    -32    
-208   -16    
-32    -64    
-16    96     
-64    80     
144    176    
-272   64     
48     64     
-48    64     
112    80     
-208   16     
176    96     
-32    144    
80     112    
16     48     
-32    80     
16     80     
0      80     
240    272    
32     48     
-96    16     
0      -16    
112    0      
-64    48     
240    176    
-192   80     
144    160    
-144   112    
16     -496   
192    80     
176    64     
32     48     
80     80     
96     48     
-144   32     
-64    112    
16     80     
-64    48     
48     -96    
-144   -96    
-96    -64    
-80    -48    
-16    -96    
80     -800   
-64    112    
16     208    
32     32     
0      -32    
96     -16    
-96    160    
144    272    
272    -208   
-80    -128   
-96    -480   
96     -32    
-112   304    
96     0      
0      112    
336    48     
-368   -544   
144    32     
16     96     
48     336    
-80    16     
80     -320   
0      544    
32     80     
16     16     
48     -128   
-48    0      
304    192    
-160   96     
192    96     
48     16     
32     80     
16     -512   
48     80     
16     -160   
64     320    
64     192    
-80    -16    
112    608    
16     -64    
-80    -32    
160    32     
-144   32     
-176   -288   
304    -304   
-64    -32    
160    -96    
160    -320   
32     32     
208    48     
-96    304    
64     32     
128    160    
-16    -192   
64     176    
112    -64    
192    240    
-16    112    
96     -272   
32     16     
-16    -288   
80     -64    
80     -112   
384    304    
-160   832    
0      -16    
96     -160   
560    528    
0      656    
0      320    
64     96     
224    256    
48     176    
32     -48    
96     64     
16     -48    
48     16     
-32    16     
64     48     
-144   -240   
192    160    
160    -240   
16     80     
112    -16    
144    112    
-256   0      
288    256    
-224   -416   
80     -784   
-48    -176   
160    -320   
-128   -352   
240    -544   
32     -16    
-32    -512   
80     176    
-96    96     
32     -752   
64     -736   
240    -144   
-32    -176   
528    256    
16     256    
448    272    
-64    272    
48     16     
544    512    
-160   32     
96     -528   
48     -304   
128    384    
144    144    
160    32     
112    32     
160    -16    
48     -704   
112    -160   
688    1168   
-416   560    
-112   -560   
112    240    
80     224    
-48    -144   
-80    176    
-80    -64    
256    256    
144    176    
-16    608    
192    944    
128    -288   
96     -1088  
144    -128   
-16    -2112  
-176   -320   
128    1072   
-16    -368   
128    -144   
-288   -608   
32     -48    
16     800    
176    -32    
-32    32     
64     -80    
-144   320    
96     -208   
384    480    
-80    64     
-48    -208   
80     -416   
64     -384   
144    -144   
80     -800   
-96    400    
288    48     
-32    16     
-16    -272   
112    32     
48     -288   
256    48     
-112   32     
112    -80    
-176   32     
192    -64    
-128   -208   
-32    -496   
-32    -224   
288    -560   
-64    -32    
32     48     
96     16     
-16    160    
80     -16    
80     16     
64     -128   
-80    -48    
208    64     
-848   -64    
224    80     
-272   -144   
80     -48    
112    -80    
96     -176   
-16    -80    
64     -560   
-128   -48    
-32    176    
304    544    
-496   48     
48     -32    
128    16     
-32    16     
-336   -32    
144    0      
-592   -32    
80     16     
112    128    
-16    -224   
112    -64    
160    -256   
-128   32     
112    -160   
80     16     
144    16     
192    48     
-144   -32    
-16    -32    
-96    48     
80     -240   
-96    32     
160    -32    
-528   0      
80     -160   
32     64     
176    -112   
-80    96     
112    0      
32     0      
64     16     
64     -48    
-112   -48    
64     -16    
-80    128    
80     0      
-64    32     
224    -336   
-656   -112   
224    -16    
-64    -80    
128    -160   
-32    144    
48     -1200  
144    96     
-96    112    
64     -48    
48     128    
32     -16    
-256   -128   
272    64     
-528   -80    
-16    -16    
0      32     
-16    -16    
176    288    
-48    -16    
-128   144    
96     -272   
192    64     
-176   32     
32     32     
-112   96     
-16    -96    
-192   -32    
-16    -304   
-96    -48    
176    16     
-144   128    
64     -96    
224    192    
-48    -208   
-48    128    
-48    32     
64     16     
0      96     
16     0      
-144   48     
-128   64     
96     384    
32     -32    
-128   -16    
224    0      
-304   -80    
-16    -256   
48     64     
-1056  -80    
-176   64     
-64    -16    
-272   64     
160    -16    
-1072  16     
48     32     
64     -32    
-16    -48    
80     64     
128    32     
-112   -128   
80     32     
-544   16     
-32    176    
-96    -16    
48     128    
-48    16     
-240   16     
0      32     
-96    -16    
-288   -96    
-224   -96    
-192   80     
368    32     
-192   32     
128    -64    
144    128    
80     16     
48     80     
-96    -176   
-272   -48    
32     80     
16     48     
-160   96     
16     16     
-80    112    
-384   -48    
-128   32     
-1424  -192   
32     96     
-32    -32    
-240   -368   
64     -176   
16     336    
-192   -416   
0      64     
48     112    
-128   48     
16     96     
48     64     
-176   0      
-128   -240   
160    -288   
-64    -112   
-128   112    
-160   -32    
240    112    
-192   -176   
48     48     
32     96     
144    96     
-16    128    
-112   48     
-64    -16    
-112   0      
-144   48     
-48    0      
160    192    
-416   -64    
304    16     
-1504  128    
80     144    
16     -144   
-144   96     
256    144    
-64    0      
-128   -208   
80     32     
-240   -192   
144    128    
-32    -48    
-304   -208   
192    -64    
-176   0      
-64    -384   
-1488  -416   
384    160    
-64    160    
80     352    
-240   192    
-128   32     
128    64     
48     16     
16     48     
-48    128    
-48    96     
-112   48     
128    240    
-112   0      
-96    -32    
-48    -16    
144    96     
-144   176    
0      80     
80     80     
-144   -64    
48     48     
-80    160    
176    -112   
80     128    
48     144    
64     -48    
-96    -208   
-272   -240   
128    -144   
-112   80     
48     416    
-208   -64    
-160   -144   
32     -64    
-176   112    
64     -160   
-128   96     
-48    208    
-64    -64    
0      -16    
64     208    
-112   -80    
-144   288    
128    128    
-336   32     
16     -288   
-128   80     
80     0      
0      48     
-96    -64    
48     -304   
16     128    
64     112    
-96    -128   
16     96     
64     64     
-48    -112   
-192   -64    
32     -32    
-96    80     
16     96     
0      64     
16     48     
-32    64     
16     64     
-32    96     
0      48     
48     80     
-16    48     
32     96     
-224   -160   
224    32     
-48    112    
80     144    
-16    272    
176    16     
-96    96     
16     0      
-48    -64    
64     80     
0      224    
32     144    
-48    64     
-64    160    
-32    48     
-288   -80    
224    0      
-112   32     
176    32     
-160   64     
-32    -32    
-176   -192   
64     -32    
-32    -16    
288    16     
16     224    
320    320    
-32    48     
-16    16     
-64    0      
96     -32    
144    16     
-96    48     
0      -176   
-368   -592   
192    -16    
-336   16     
48     -288   
-128   16     
48     64     
-16    16     
16     160    
64     48     
32     240    
48     16     
32     96     
64     48     
-16    -160   
-64    -1280  
-16    112    
80     64     
-240   -192   
256    -384   
-32    -64    
288    160    
-32    304    
32     240    
144    96     
-192   64     
80     144    
-208   208    
224    272    
672    880    
-576   208    
-272   -816   
432    -336   
112    816    
-32    -144   
48     80     
80     256    
-192   64     
-16    -128   
48     -272   
-208   -96    
208    224    
-80    80     
224    128    
64     112    
160    400    
-224   -352   
256    -272   
336    288    
-112   -96    
256    240    
-144   0      
128    0      
-144   -64    
160    0      
-64    -336   
112    128    
-160   64     
64     -32    
64     192    
144    -544   
-432   -192   
128    -2768  
-144   0      
128    96     
-272   -208   
-64    48     
128    176    
-96    -576   
-128   192    
224    -48    
-128   -240   
208    -464   
0      64     
320    224    
-176   -336   
64     80     
224    112    
256    48     
-304   128    
672    432    
-848   112    
176    16     
-48    64     
208    112    
-192   384    
144    0      
240    288    
-48    0      
64     96     
64     -64    
112    240    
96     96     
80     96     
80     -1984  
112    112    
-112   48     
112    160    
112    208    
-64    144    
-64    144    
256    224    
272    80     
-272   -80    
144    96     
160    144    
-224   32     
48     -80    
224    64     
-48    -272   
64     -32    
-32    -256   
64     64     
-128   -32    
64     160    
48     16     
-144   144    
192    32     
64     112    
176    160    
-128   -272   
128    176    
48     -288   
16     112    
192    -176   
-112   48     
112    304    
-96    -32    
160    -128   
160    224    
176    16     
144    -96    
48     176    
-80    -32    
48     112    
32     -208   
64     32     
176    272    
32     -32    
48     80     
224    192    
16     48     
80     160    
-160   16     
144    112    
-64    -16    
160    96     
96     160    
-80    -272   
192    128    
-96    -160   
128    32     
32     -48    
-128   -48    
48     -272   
96     144    
176    80     
-128   -576   
32     16     
96     -384   
-32    -32    
160    -96    
96     -416   
128    -32    
-256   -336   
352    -160   
-32    0      
224    16     
-176   -16    
176    -192   
0      16     
144    96     
64     -144   
-48    64     
-160   -32    
-112   -192   
112    -160   
112    -128   
144    -64    
-160   -160   
240    -32    
16     -448   
48     -48    
32     -160   
48     0      
224    160    
-176   208    
-80    -48    
64     32     
-16    -112   
96     -64    
-352   -48    
144    16     
160    -80    
-64    -720   
48     -64    
48     -624   
32     -64    
128    -208   
-128   128    
-32    -224   
-16    64     
96     -144   
80     -192   
0      -16    
64     16     
-368   -64    
-16    -64    
-64    -128   
368    80     
-32    -48    
16     -96    
0      0      
96     -176   
-192   -32    
336    -192   
-32    -96    
224    -64    
-160   80     
256    48     
144    0      
-176   16     
16     -208   
-32    32     
96     -144   
0      -16    
48     -144   
-128   -160   
-32    -720   
224    112    
-144   32     
144    144    
-112   -48    
-32    -32    
-80    -64    
-96    -256   
-160   -48    
-144   32     
160    -96    
16     80     
-288   -48    
-32    -208   
32     -16    
96     -144   
256    352    
-176   -64    
64     112    
-96    80     
-64    -304   
160    64     
16     64     
-144   48     
32     -32    
16     128    
-112   -160   
-1184  -16    
80     -176   
-32    32     
-320   -432   
304    -704   
48     -928   
224    -160   
-80    -336   
480    336    
-304   624    
144    368    
-336   -176   
64     -192   
-32    -224   
80     -176   
208    80     
-32    64     
112    96     
-32    -240   
128    32     
256    -1024  
0      176    
-224   176    
-272   -192   
192    -240   
96     -144   
320    208    
-128   -64    
96     224    
128    16     
80     48     
-112   -272   
96     64     
-208   -256   
-176   176    
32     16     
304    352    
-256   96     
0      160    
-112   -16    
-224   -96    
-240   -432   
192    -512   
144    288    
272    256    
128    224    
-384   -80    
16     -96    
-624   -160   
80     -224   
48     112    
-416   160    
-64    -96    
-208   144    
-144   0      
32     -160   
80     32     
32     112    
-96    -192   
-288   224    
80     16     
-160   -160   
-80    112    
96     -80    
0      48     
-32    0      
32     0      
-64    32     
-176   336    
-336   -352   
-80    80     
-32    560    
96     176    
0      -464   
-432   -128   
80     208    
-144   -144   
240    176    
48     -112   
-144   208    
-32    160    
-176   -192   
64     -208   
-32    -64    
128    256    
-48    176    
-16    16     
-1856  48     
64     48     
48     32     
64     320    
224    112    
-192   -48    
64     -16    
80     -16    
-96    288    
16     48     
16     32     
-16    48     
-80    48     
-48    -48    
96     32     
-80    32     
112    96     
-112   32     
32     48     
-96    -80    
80     112    
144    144    
-176   272    
144    416    
-32    416    
-48    320    
-80    112    
-128   -64    
-80    -16    
-48    48     
-96    -64    
96     96     
-2128  -192   
64     128    
-336   -272   
160    144    
32     192    
-48    112    
-48    80     
-16    -64    
-112   16     
48     96     
-32    64     
64     112    
32     160    
-96    224    
128    656    
-800   144    
-16    0      
-96    -80    
48     32     
-128   -128   
-16    -272   
64     160    
640    752    
-160   1264   
80     1120   
176    592    
-176   0      
96     -224   
-272   -192   
160    80     
-176   240    
112    176    
-16    16     
-304   48     
560    592    
-528   48     
32     -560   
128    112    
80     144    
-32    160    
16     48     
-304   112    
224    -784   
-176   400    
32     272    
-208   -224   
176    112    
0      176    
64     256    
-112   32     
128    144    
-240   208    
144    640    
0      -112   
-320   -480   
176    208    
-96    240    
0      112    
144    48     
96     -144   
-256   -192   
96     144    
80     128    
144    64     
-96    96     
224    288    
48     48     
-32    -80    
160    32     
-96    -16    
0      176    
-112   256    
0      64     
-320   16     
240    -48    
-208   -96    
96     112    
0      160    
-48    64     
-32    96     
112    -16    
272    144    
-432   -448   
384    -704   
16     -432   
368    208    
-208   96     
80     48     
-48    -112   
48     224    
224    192    
-160   -80    
496    112    
-176   160    
144    64     
16     80     
16     -32    
48     64     
16     96     
16     32     
-16    144    
0      -16    
-32    16     
240    336    
256    144    
-144   64     
112    48     
144    48     
-128   80     
-144   -288   
720    64     
-448   48     
512    -80    
-256   176    
240    80     
-240   272    
176    160    
0      128    
-144   48     
-64    48     
240    288    
-128   -16    
112    160    
16     -48    
336    160    
-272   112    
32     48     
-16    80     
-128   208    
48     16     
-80    96     
16     144    
-96    32     
-144   -160   
-80    -1136  
160    160    
128    80     
-64    64     
144    0      
-128   32     
-64    -48    
96     112    
-48    32     
64     48     
0      96     
112    128    
-128   96     
64     96     
0      112    
160    -400   
32     192    
32     96     
160    16     
64     0      
176    112    
-80    96     
208    96     
32     64     
80     80     
80     240    
-64    -32    
-32    -160   
32     -80    
-160   208    
320    -176   
-96    144    
32     -16    
16     112    
32     96     
160    80     
-240   -48    
288    240    
-16    -32    
-32    -80    
-64    112    
304    240    
-288   -32    
128    -64    
112    96     
0      -368   
-96    112    
48     -2672  
-96    -192   
-80    112    
352    224    
-144   64     
-128   -112   
144    32     
80     48     
0      64     
192    336    
-128   64     
-144   -64    
288    -32    
-64    -80    
-16    -64    
-160   -208   
240    64     
-80    80     
64     128    
64     -496   
32     80     
-48    -80    
96     64     
48     64     
-32    112    
112    80     
-16    -240   
-48    -96    
208    -96    
-16    48     
16     -144   
128    96     
0      -672   
48     80     
32     336    
0      48     
96     144    
-32    80     
0      48     
48     -96    
128    144    
-112   -48    
80     160    
32     -176   
256    32     
-80    -352   
176    48     
-64    -512   
64     144    
-16    64     
48     128    
0      16     
32     64     
48     -16    
64     -64    
288    192    
-176   64     
16     128    
-64    48     
432    144    
176    112    
-192   80     
192    -16    
-64    96     
160    112    
-48    192    
-192   -176   
272    -240   
-240   -272   
208    32     
-32    176    
-240   -320   
112    64     
64     368    
304    352    
-64    -16    
32     240    
-192   -112   
368    128    
-208   -64    
368    0      
-16    144    
224    -1232  
16     160    
48     32     
-64    -336   
80     176    
144    128    
-144   -192   
-112   80     
64     -288   
-96    -272   
80     -352   
-64    32     
0      -48    
32     -480   
32     112    
48     -160   
-192   -672   
336    -48    
48     -208   
112    32     
32     -16    
64     -64    
384    320    
-240   -176   
-48    -192   
-144   -448   
96     -112   
336    336    
-96    64     
32     32     
-336   -32    
176    112    
96     32     
32     48     
112    128    
64     128    
-96    -208   
-96    -1632  
32     -336   
32     240    
96     48     
272    -32    
-96    208    
64     32     
224    -80    
-128   272    
-80    96     
-128   -288   
48     192    
48     144    
112    -128   
-64    -112   
48     -96    
48     288    
272    -160   
-64    -192   
48     -384   
-96    432    
272    -400   
32     -48    
-32    -80    
208    -48    
128    432    
-192   -208   
0      -256   
288    176    
256    528    
-48    128    
-80    -192   
160    -480   
-96    -240   
-96    48     
192    80     
16     32     
96     112    
112    96     
-48    -144   
-592   -32    
144    -208   
-352   -16    
80     -160   
112    -48    
-32    -96    
0      -176   
-16    -656   
80     -368   
32     -304   
272    272    
-144   144    
80     304    
-128   -832   
160    -144   
-304   -208   
208    -320   
-544   64     
-32    -16    
-784   -96    
-80    -240   
128    192    
0      -256   
128    128    
144    -560   
16     80     
-48    112    
80     -160   
80     272    
-16    416    
288    512    
-64    336    
-96    0      
-128   -576   
-80    32     
-48    -208   
48     32     
-16    -192   
128    112    
32     -272   
64     -256   
-496   -32    
16     -80    
-64    32     
64     16     
-352   -176   
160    -576   
-112   -112   
-112   -848   
-128   -512   
208    64     
-32    416    
272    16     
-16    240    
-80    -64    
80     -272   
64     400    
32     144    
-48    -16    
112    0      
192    512    
-352   -320   
-16    -272   
288    272    
-800   224    
-16    -704   
80     -80    
-848   -128   
-176   -304   
80     48     
-704   176    
16     -240   
-448   224    
272    384    
-336   -400   
128    128    
-176   -384   
64     -336   
416    352    
-192   192    
-80    -416   
64     -112   
-416   -16    
64     -144   
-224   -96    
48     144    
0      304    
-64    64     
-256   -288   
-1040  -32    
176    960    
192    96     
-192   -96    
-128   -352   
-160   16     
-112   -208   
-240   -320   
144    -256   
-112   -48    
-96    80     
128    -128   
-96    32     
-272   16     
-112   -80    
-48    -64    
96     128    
-1280  160    
-32    -128   
-64    -400   
16     -16    
96     16     
-80    0      
48     64     
-96    48     
16     64     
-16    64     
-112   -80    
48     112    
64     32     
-272   240    
-48    -16    
-784   -192   
-64    -160   
128    -16    
-160   -400   
-48    -304   
144    48     
-224   96     
-160   -192   
320    272    
-256   16     
272    48     
-128   96     
16     -96    
-128   32     
-160   -112   
-336   -32    
-256   96     
112    -224   
480    80     
-160   96     
176    240    
-240   288    
400    576    
-48    336    
80     128    
-96    -48    
-160   -176   
-16    -80    
-16    -16    
0      -80    
-208   160    
-48    224    
-576   192    
-48    192    
112    80     
-272   224    
144    32     
48     -176   
-112   0      
0      -96    
-80    48     
192    -80    
-16    -48    
192    144    
64     192    
-176   128    
-32    96     
-272   176    
112    160    
-320   -128   
-144   -48    
-80    48     
32     -48    
-160   -352   
-64    64     
192    304    
-208   224    
176    256    
0      256    
-400   48     
-208   -112   
16     32     
-192   0      
-32    224    
160    160    
-112   32     
-192   -96    
272    -304   
32     112    
192    48     
-80    0      
0      -48    
32     48     
0      -16    
48     176    
0      -32    
16     128    
48     48     
-160   16     
-32    96     
64     48     
-112   0      
64     0      
48     -64    
0      32     
0      64     
-48    16     
32     -16    
-128   128    
336    176    
-304   -16    
112    112    
-224   -64    
64     48     
64     112    
-128   96     
48     128    
96     48     
-128   64     
144    64     
-176   -32    
-80    -16    
-16    0      
80     -112   
48     176    
32     112    
-240   96     
336    240    
-256   96     
224    80     
-224   80     
144    64     
64     96     
-160   32     
160    112    
-128   112    
-16    320    
128    80     
32     64     
48     144    
-80    -64    
-128   -176   
-32    -64    
144    -32    
112    144    
-32    96     
272    256    
-160   256    
64     208    
16     112    
64     -112   
64     112    
-48    16     
-144   0      
48     160    
-160   -112   
-80    -16    
128    96     
-48    96     
80     64     
-80    32     
-32    64     
32     0      
-32    32     
-16    32     
0      -48    
-96    -96    
64     112    
-80    16     
16     48     
-96    96     
176    -272   
96     80     
-80    176    
-16    224    
96     96     
-32    96     
256    208    
-144   176    
-240   160    
240    240    
-80    272    
-64    176    
-80    80     
160    80     
112    -64    
-144   -416   
80     -48    
0      -80    
0      48     
128    192    
32     -128   
-64    -192   
96     -32    
-32    208    
176    128    
-256   -288   
160    -32    
-96    144    
96     288    
128    -16    
-96    -1264  
80     64     
-112   16     
400    560    
-320   -336   
0      -48    
-144   352    
160    -400   
-96    512    
16     16     
-96    -64    
144    -224   
-144   -144   
112    -160   
-256   -288   
16     -272   
-32    352    
0      -560   
0      -16    
-16    192    
208    192    
-96    -64    
-144   80     
176    224    
-32    -224   
-64    -176   
64     288    
-16    160    
0      0      
208    176    
-192   -144   
176    48     
-176   -752   
240    96     
-96    48     
96     224    
80     -64    
0      160    
-48    128    
-64    -80    
80     -256   
-144   256    
304    192    
320    256    
-384   -608   
64     -480   
48     320    
-16    -400   
160    64     
-256   -832   
368    -400   
256    64     
304    272    
-80    0      
352    368    
192    1120   
-192   -112   
320    -128   
16     192    
80     160    
-192   -112   
240    96     
-160   -112   
-256   -128   
288    -1440  
-32    208    
-128   400    
112    -400   
272    -48    
-48    192    
432    144    
-496   -352   
96     304    
-256   -512   
64     448    
112    -208   
-192   -400   
272    384    
-64    480    
64     -272   
176    384    
-320   -384   
80     112    
-272   0      
592    -656   
-80    592    
-16    96     
128    -304   
80     96     
112    96     
176    -16    
112    144    
16     -320   
0      128    
80     -96    
112    128    
-48    32     
96     128    
144    208    
-240   272    
-32    -368   
144    -176   
96     48     
256    -208   
16     -192   
160    96     
32     -48    
32     -48    
256    304    
-16    128    
-160   -160   
80     80     
32     -1232  
-144   -560   
80     -1440  
368    -160   
-144   -16    
176    -368   
-16    -384   
128    -944   
192    592    
16     -272   
-288   -544   
496    96     
-64    -64    
192    256    
-112   192    
256    0      
-64    416    
-272   -160   
160    -128   
-144   -64    
128    -400   
112    -112   
48     -192   
16     -16    
64     -144   
64     -64    
48     80     
-144   -240   
96     -160   
192    144    
48     -48    
240    576    
-752   -176   
208    -128   
-80    96     
64     16     
0      -208   
-128   -496   
320    -16    
-208   -784   
192    -288   
32     -336   
48     -32    
128    -320   
64     80     
144    -96    
-64    -224   
16     288    
64     -48    
-464   -32    
112    -176   
208    32     
-112   -128   
0      -192   
64     -944   
-48    -32    
96     112    
80     64     
-80    -64    
176    208    
-176   -32    
224    240    
-208   160    
-128   -224   
192    -32    
16     -144   
-144   -160   
64     -192   
48     -144   
96     -160   
80     96     
32     -768   
-32    48     
96     -112   
48     48     
64     96     
16     0      
32     64     
16     -96    
-224   -32    
208    64     
-1056  128    
-64    -64    
0      80     
288    48     
160    32     
80     -608   
-80    80     
-336   -160   
480    32     
0      0      
384    -160   
-160   224    
0      -48    
-16    32     
16     -176   
-80    -96    
64     0      
-224   -96    
272    -128   
-64    48     
256    -112   
48     80     
160    -1296  
160    32     
-144   32     
112    -192   
-32    32     
-160   -176   
-304   -80    
96     32     
-256   -80    
48     -288   
-304   160    
80     -208   
-128   80     
16     -224   
144    144    
208    -80    
48     -32    
-112   32     
-208   -240   
416    304    
-112   368    
64     48     
64     192    
-96    256    
32     -192   
-656   -368   
160    -112   
288    80     
176    -192   
-32    96     
-48    288    
112    96     
-80    32     
16     -32    
96     16     
16     -96    
-128   -32    
304    48     
-256   208    
16     32     
-192   224    
-736   -80    
176    48     
-224   -240   
-1232  -64    
-160   -16    
-864   -48    
-192   -192   
-176   80     
192    -80    
144    64     
-160   96     
192    -16    
32     144    
-576   -80    
-32    0      
-80    -224   
64     128    
-800   -464   
304    80     
-192   208    
32     32     
-224   32     
-240   96     
-80    -16    
-336   112    
-16    80     
-48    64     
64     48     
-352   -128   
128    112    
-208   -144   
96     64     
-96    -128   
-128   96     
64     0      
-160   -112   
-64    64     
48     -16    
-32    80     
-272   16     
-48    64     
-112   -64    
-160   -64    
0      -144   
64     176    
-32    -32    
-48    0      
-16    96     
208    48     
-192   16     
0      -16    
-48    32     
32     0      
-112   -16    
-192   32     
-16    -48    
-448   -208   
128    48     
-208   -96    
128    144    
-64    -32    
48     64     
16     32     
-48    -16    
16     48     
-48    32     
64     96     
16     160    
-160   80     
-80    -144   
-80    -64    
-128   48     
0      16     
0      48     
288    112    
-128   -64    
32     80     
-48    112    
-32    144    
32     64     
48     240    
-176   240    
-400   -272   
-160   -240   
240    16     
64     96     
-192   64     
64     96     
-432   -160   
-16    -224   
-48    48     
240    112    
-176   96     
-96    -160   
-64    48     
-48    -208   
-16    -288   
16     -144   
-80    0      
64     176    
16     208    
-192   -256   
64     -96    
-816   96     
176    352    
-48    0      
80     336    
32     -208   
-16    -224   
48     256    
80     -16    
0      160    
-16    384    
144    288    
0      336    
-64    64     
48     144    
-16    336    
16     -48    
-80    -48    
224    -48    
32     128    
64     16     
-192   48     
-48    -208   
272    272    
-112   176    
32     0      
64     64     
-112   16     
64     80     
-128   16     
-16    32     
160    64     
-48    -80    
336    432    
-352   -208   
96     -112   
16     -80    
0      64     
64     288    
-80    -320   
-48    -128   
128    144    
-592   -176   
224    -160   
80     240    
32     288    
32     32     
80     -144   
-48    -176   
16     -48    
176    -32    
160    528    
256    480    
-224   112    
-64    -256   
80     -32    
112    368    
-272   -48    
128    160    
-144   112    
272    256    
-112   32     
32     288    
-160   -144   
-16    -592   
-128   -64    
112    96     
80     320    
-64    208    
48     96     
-208   -64    
-80    64     
112    48     
-128   64     
-208   -128   
-144   -176   
-192   80     
0      0      
384    416    
-496   192    
-64    -528   
192    96     
80     1312   
224    -160   
-336   -528   
64     -400   
144    560    
-16    128    
-96    16     
208    -208   
288    384    
-48    224    
-432   -976   
256    -608   
272    880    
-384   224    
304    -608   
-144   -112   
224    -80    
-96    304    
-176   368    
-192   -672   
80     -256   
144    480    
-192   -96    
112    -48    
128    32     
0      80     
-16    304    
144    -384   
0      -224   
16     80     
208    528    
0      -128   
-128   -32    
80     -32    
-112   224    
48     -272   
-160   464    
224    -80    
-176   -368   
112    -112   
-192   144    
256    208    
-80    -96    
112    336    
-80    -416   
96     -48    
-112   -272   
-32    128    
256    112    
64     128    
80     80     
256    16     
-176   16     
160    -416   
112    144    
-256   -144   
304    64     
-192   160    
96     304    
16     -224   
112    384    
-80    -64    
176    -96    
-48    320    
160    -16    
-144   -144   
192    -320   
128    144    
256    496    
-176   160    
16     -880   
224    0      
-208   32     
144    176    
144    448    
-304   80     
48     -128   
32     352    
-32    128    
-48    0      
-96    -64    
160    -240   
48     272    
-128   -304   
32     160    
-160   -1392  
240    160    
-128   112    
80     224    
144    -80    
48     48     
192    112    
-16    144    
-16    48     
0      16     
96     224    
0      208    
96     208    
256    0      
-288   256    
0      -432   
-16    144    
144    -432   
-48    16     
112    64     
-32    96     
32     -80    
32     64     
176    256    
-176   192    
160    112    
-32    -16    
32     -48    
-48    -192   
96     16     
128    128    
-144   80     
-32    -80    
80     -16    
64     -32    
-64    112    
48     16     
0      96     
176    144    
0      32     
16     80     
16     96     
144    80     
32     -48    
-80    352    
192    64     
-48    0      
48     -416   
160    128    
-32    112    
96     160    
80     80     
176    0      
-176   144    
256    -384   
32     144    
32     -64    
32     80     
64     -112   
144    48     
0      -400   
192    128    
176    240    
32     448    
224    -48    
-16    -288   
192    64     
-240   -2096  
288    208    
-176   80     
384    32     
-256   64     
160    -32    
-192   -128   
192    256    
-240   -16    
-112   0      
-64    -192   
32     -880   
-192   240    
320    432    
-256   544    
-448   64     
-48    -400   
32     16     
128    -224   
-96    -176   
208    -48    
0      -16    
160    -96    
-128   -64    
208    112    
-32    -128   
-224   -480   
96     -192   
288    -32    
-16    80     
-112   16     
48     -144   
48     0      
0      -64    
96     80     
96     -320   
32     64     
208    608    
224    -80    
80     -208   
256    240    
-64    -160   
-48    80     
144    -96    
32     -16    
-224   -96    
64     16     
-736   32     
-80    -176   
160    112    
192    32     
128    -48    
144    -448   
272    368    
-304   -144   
320    256    
-304   16     
64     -64    
16     -16    
128    -96    
-224   -224   
288    -208   
-320   0      
560    16     
-352   112    
416    -32    
-176   -144   
-160   -400   
256    -112   
-32    -816   
160    96     
-80    -16    
-192   96     
64     -160   
-64    -80    
0      -32    
128    64     
-384   80     
96     48     
-544   -32    
80     -48    
-272   -16    
-16    80     
80     16     
-80    -464   
224    160    
-112   -192   
0      16     
-80    -32    
64     -32    
64     48     
32     -48    
-80    0      
32     -80    
-416   -64    
-80    -272   
-208   64     
-32    -112   
80     128    
80     -512   
16     48     
32     176    
160    176    
-32    144    
32     -144   
-176   -160   
272    80     
-512   144    
-160   -32    
-448   0      
128    -48    
128    -16    
224    128    
-48    256    
48     16     
80     -32    
144    224    
0      -32    
-160   112    
240    544    
-128   -48    
-96    -16    
-224   256    
288    448    
80     368    
144    64     
160    112    
-64    -176   
32     32     
160    32     
128    80     
-128   64     
64     -48    
64     -48    
176    0      
-80    80     
144    16     
-32    64     
96     0      
-112   48     
-16    -96    
-224   -176   
112    -464   
192    112    
-224   -32    
144    -176   
-192   -16    
-1616  416    
-208   -272   
368    160    
-256   480    
160    16     
-224   144    
176    112    
-224   -32    
160    112    
-64    -160   
-32    -112   
32     224    
-144   -272   
-256   -160   
80     -48    
-128   160    
32     48     
-48    -64    
16     48     
-512   -80    
-176   64     
176    -112   
-80    0      
16     144    
-48    112    
-288   -128   
144    80     
-16    128    
-224   -240   
-160   -352   
32     -160   
128    32     
-16    -80    
48     112    
-880   0      
160    64     
-64    48     
144    112    
-128   -64    
64     112    
-48    -144   
80     80     
-48    48     
-32    80     
-16    48     
-80    64     
-80    128    
-96    -48    
-64    48     
-448   -240   
128    0      
-368   16     
-80    64     
-48    32     
48     192    
128    -16    
16     144    
176    400    
48     320    
32     -128   
288    80     
-96    96     
192    48     
-272   -144   
400    -432   
-176   -384   
-304   -352   
912    416    
-368   640    
-16    -64    
-80    -224   
240    192    
32     240    
-368   -288   
752    352    
160    656    
304    320    
0      -272   
80     656    
-304   -272   
160    80     
-736   -96    
-240   -544   
-384   160    
-208   160    
-128   -208   
16     144    
64     64     
-80    -16    
-32    -32    
-32    304    
192    80     
-352   -400   
176    272    
-320   240    
-208   -592   
-240   96     
-208   -128   
-384   448    
112    416    
-304   -192   
96     48     
-192   144    
224    -288   
112    32     
-176   -16    
0      96     
304    240    
-496   -336   
32     320    
-64    -80    
-48    128    
48     -48    
-256   96     
176    1056   
224    432    
-704   -672   
192    720    
128    512    
-240   192    
-160   -144   
80     -240   
-64    288    
208    96     
-304   -272   
112    -288   
-336   -80    
480    528    
-384   448    
-48    64     
-32    -128   
128    -176   
-112   -48    
112    -112   
64     -32    
64     48     
-144   -48    
192    144    
-80    48     
-144   48     
80     112    
-224   -64    
32     96     
48     112    
-32    176    
96     96     
16     16     
144    -32    
288    256    
-208   80     
160    96     
-48    0      
48     96     
224    -128   
-16    -208   
288    240    
-208   96     
176    240    
-144   336    
-80    160    
-64    48     
64     0      
64     48     
80     96     
144    16     
-176   -128   
688    528    
-512   272    
176    48     
-192   80     
240    48     
-96    -16    
112    80     
-48    80     
-48    -192   
-112   48     
160    96     
-160   -64    
48     -128   
-128   112    
144    -304   
-224   -320   
112    -160   
-64    -32    
80     0      
112    80     
-160   16     
96     336    
-48    80     
112    64     
-16    176    
528    208    
-368   192    
400    432    
-576   256    
176    96     
304    384    
-352   80     
-48    96     
16     0      
112    80     
-240   -176   
80     96     
-16    128    
-16    -16    
-64    80     
192    48     
-224   96     
48     32     
-16    112    
80     96     
-32    128    
-112   0      
80     -48    
16     64     
80     96     
208    224    
-64    -400   
16     96     
96     128    
48     48     
64     16     
48     64     
64     80     
-80    128    
80     208    
48     -64    
-64    -64    
272    -32    
-48    96     
224    112    
160    96     
-272   -912   
320    -64    
-112   32     
-64    224    
192    176    
96     192    
16     80     
64     48     
48     0      
240    48     
-64    32     
80     64     
16     -64    
0      -336   
32     -128   
112    -208   
80     192    
32     144    
160    240    
16     112    
160    192    
-160   -16    
-48    -144   
336    -176   
96     352    
-64    128    
80     128    
-16    112    
64     -176   
-64    48     
128    -416   
32     -16    
80     -144   
-16    -128   
224    48     
-32    192    
192    192    
-240   80     
112    0      
128    256    
-304   -80    
176    112    
64     0      
176    -32    
-64    -176   
192    -304   
48     240    
208    -1200  
-240   0      
160    -176   
32     -80    
0      96     
64     64     
-80    0      
432    672    
32     160    
208    64     
-16    112    
96     -96    
176    384    
128    -64    
-112   16     
192    -240   
128    384    
80     -384   
80     32     
-32    64     
96     16     
-128   48     
208    144    
-64    128    
-80    -80    
96     176    
208    -144   
-80    -80    
128    -800   
192    96     
96     -224   
96     224    
64     -384   
-128   -96    
240    -64    
32     224    
128    -32    
-320   112    
320    128    
32     80     
48     144    
16     -480   
-128   80     
96     -112   
80     112    
144    -208   
16     208    
224    -128   
48     208    
-224   -16    
128    32     
144    128    
-96    -16    
96     -16    
32     -128   
-16    96     
-16    32     
192    208    
-96    112    
-224   48     
80     -128   
0      -64    
176    -32    
64     416    
-144   192    
224    128    
-208   -16    
-944   -48    
-16    -624   
32     -96    
48     -768   
16     48     
64     0      
-96    -304   
224    64     
-112   -48    
16     192    
80     -400   
112    208    
240    352    
-128   -736   
-128   -208   
-1104  48     
-240   -448   
272    336    
-16    -400   
64     -688   
-64    -432   
176    -336   
64     240    
-96    64     
-48    -480   
112    96     
224    -240   
128    432    
-48    -16    
288    -48    
-224   -192   
64     -32    
-144   272    
384    -144   
-240   -96    
144    -704   
-48    -48    
224    -656   
-160   32     
176    -80    
16     48     
32     -32    
0      64     
48     0      
48     -80    
-192   224    
-48    -32    
-1520  -272   
112    0      
128    -16    
48     -336   
48     -32    
80     -928   
0      -288   
16     -272   
80     80     
0      96     
224    128    
0      96     
16     48     
80     -48    
-64    48     
-80    16     
16     -80    
128    32     
-48    -128   
128    -80    
176    -368   
224    128    
-144   -848   
32     -112   
208    -64    
-80    48     
64     16     
128    -32    
-80    -64    
64     48     
192    400    
64     144    
-1152  160    
-48    -368   
-144   -64    
-16    -208   
64     160    
-16    -720   
48     128    
48     0      
208    96     
-176   96     
80     -128   
-96    64     
272    -32    
-352   32     
128    -160   
-576   -32    
176    -224   
160    96     
-192   96     
-64    -64    
0      -672   
32     -80    
-144   -592   
80     -80    
-288   -112   
32     -224   
-64    16     
96     -80    
-368   -560   
272    80     
-240   288    
96     0      
96     160    
-128   -224   
0      -192   
16     -128   
-16    -80    
-32    -256   
208    128    
-432   64     
128    -464   
-176   112    
192    -16    
32     176    
-224   64     
608    128    
-384   16     
304    -16    
48     528    
192    272    
-112   -464   
80     64     
-96    48     
-32    -128   
48     -272   
-80    -80    
0      96     
160    288    
64     128    
-160   144    
-224   0      
32     -16    
-16    96     
-160   16     
176    0      
-464   -240   
64     144    
-144   -160   
-224   272    
-80    -144   
64     -16    
208    96     
16     224    
-96    96     
-128   -240   
-80    128    
-1168  -288   
80     -352   
-160   -352   
80     -16    
-208   -256   
-48    -16    
-144   -160   
96     -240   
32     16     
432    64     
-208   224    
-352   -64    
-176   128    
144    -64    
48     16     
96     -112   
176    0      
80     -112   
32     -48    
-32    -96    
32     64     
-64    32     
160    208    
-208   288    
-240   96     
-304   16     
-560   -80    
304    128    
-288   112    
-16    16     
-96    -176   
192    -112   
-240   -96    
-64    32     
-144   16     
128    -16    
-80    -48    
64     16     
-96    16     
-48    -48    
-80    -96    
-32    16     
-112   96     
-304   80     
48     80     
-48    16     
64     64     
-192   -32    
-32    -80    
96     80     
48     128    
-176   96     
-96    -112   
-48    -32    
-80    80     
-16    64     
-144   16     
32     80     
-352   80     
-80    48     
128    -16    
288    352    
-288   32     
80     -112   
-80    48     
64     32     
-144   32     
0      80     
-48    16     
-160   -176   
128    64     
-64    0      
-128   -160   
-384   -48    
208    224    
-688   64     
96     224    
16     128    
64     112    
-128   80     
-32    -16    
192    304    
-288   128    
144    80     
-96    -48    
-16    80     
160    176    
-112   0      
-32    -240   
-112   224    
336    16     
-208   80     
288    112    
-80    32     
-64    32     
208    0      
208    384    
-288   192    
-144   112    
96     0      
-48    48     
-80    80     
48     -80    
-112   48     
48     96     
-608   -16    
16     16     
-32    16     
16     64     
0      64     
-80    -112   
-112   96     
0      32     
-144   80     
64     48     
-144   48     
-16    48     
128    112    
-320   -96    
-144   48     
-304   -144   
112    208    
-176   224    
80     112    
-192   -96    
128    -16    
-96    48     
48     48     
-192   240    
352    112    
-160   -64    
-160   -16    
80     128    
-352   96     
16     176    
128    192    
-32    192    
48     256    
128    144    
-48    144    
32     -48    
64     64     
-64    96     
16     112    
-160   48     
144    48     
-288   -144   
224    -176   
-32    32     
-16    32     
-96    112    
32     144    
32     -32    
-32    64     
192    48     
-80    48     
96     368    
160    256    
-224   -32    
48     -64    
64     64     
-48    48     
80     16     
48     -32    
64     144    
64     64     
0      -16    
144    16     
112    160    
16     -32    
-16    96     
-48    144    
-64    64     
32     0      
48     0      
112    96     
-48    16     
96     64     
16     112    
-16    64     
-304   -448   
-80    -256   
96     96     
-64    112    
-64    16     
192    80     
-112   32     
16     96     
-112   160    
-64    112    
32     -48    
-80    16     
96     96     
-128   96     
32     32     
80     112    
16     -96    
96     96     
-32    80     
-80    48     
-80    48     
-96    0      
144    32     
-432   -480   
48     -224   
112    256    
-16    272    
-384   -48    
-128   0      
192    -1920  
-112   -64    
64     128    
16     48     
-16    64     
0      -16    
80     64     
48     160    
32     64     
-112   -48    
128    0      
128    16     
-128   0      
128    96     
-16    176    
-64    -1344  
256    256    
-176   224    
-48    128    
-80    -48    
240    32     
96     64     
112    288    
16     -288   
48     -448   
-80    -368   
208    -384   
208    160    
112    -320   
144    -80    
224    -304   
128    32     
96     -112   
32     32     
32     240    
-16    16     
48     336    
64     304    
64     224    
-336   -208   
-48    224    
144    -288   
-224   288    
224    -32    
32     288    
-256   -208   
176    -400   
320    -256   
-176   336    
-32    -160   
256    0      
-48    -16    
64     32     
64     32     
64     272    
16     96     
304    320    
-144   320    
16     208    
224    96     
-176   80     
128    160    
32     -304   
-16    208    
288    -384   
-128   112    
64     80     
112    80     
16     48     
48     64     
-176   64     
160    -112   
-48    80     
48     -80    
16     112    
-32    -208   
352    144    
-224   -64    
384    224    
-64    -384   
144    176    
-96    -288   
224    -192   
112    -32    
96     128    
96     -32    
0      192    
224    240    
-80    -336   
80     96     
-32    -176   
176    304    
-192   -144   
256    240    
-16    96     
128    112    
32     -48    
80     160    
0      -96    
-16    16     
64     96     
128    -32    
144    128    
-80    -112   
80     144    
0      -160   
176    -48    
0      96     
224    496    
16     432    
96     0      
80     80     
-240   80     
-16    -192   
32     -112   
-16    -1344  
96     -96    
-160   -224   
64     -448   
384    416    
-112   16     
-144   16     
80     -176   
16     128    
80     -288   
0      -112   
144    48     
-96    -832   
240    -112   
-1104  288    
176    144    
32     -256   
0      -16    
32     32     
-16    -688   
112    -240   
48     320    
128    -144   
0      544    
80     832    
304    384    
-240   384    
32     -496   
240    192    
-480   -144   
80     -32    
64     80     
112    -320   
16     192    
80     48     
-48    -144   
16     -336   
128    -96    
64     16     
96     -224   
48     -272   
16     384    
96     160    
-80    -528   
-112   -352   
32     -288   
64     -64    
80     -128   
48     -80    
144    -144   
176    -160   
-48    -1568  
128    96     
-16    -144   
0      128    
-48    224    
-32    336    
144    -80    
176    -16    
-256   -208   
-64    -224   
-1680  64     
208    128    
-432   -64    
112    -160   
-48    -16    
208    -48    
-256   16     
64     -1344  
144    208    
64     80     
288    64     
-208   -32    
400    256    
-656   -384   
144    128    
-432   144    
0      -224   
128    160    
160    -96    
-304   48     
400    -672   
-256   96     
336    -2016  
-336   48     
352    96     
-112   -48    
-80    -144   
-48    -144   
-80    -80    
48     -160   
-80    -32    
208    0      
-704   0      
80     -288   
-80    -368   
160    -272   
256    80     
0      -368   
32     80     
64     144    
240    288    
-240   -48    
-32    -112   
272    -16    
-80    128    
144    -32    
112    112    
-16    80     
-64    -176   
-272   -48    
128    -224   
240    0      
128    -160   
32     64     
-32    -32    
0      -128   
144    64     
144    -16    
-112   -32    
96     32     
0      64     
-16    -96    
-160   32     
48     -80    
-144   32     
144    64     
-32    16     
-80    -384   
-16    80     
-32    -32    
-16    -16    
-160   -32    
288    240    
-352   -32    
128    -192   
-224   -48    
64     -32    
-64    64     
-64    -48    
96     -48    
-160   -352   
208    240    
32     -272   
160    272    
-160   96     
192    -64    
-32    48     
96     80     
-112   -64    
-48    16     
-32    16     
-32    144    
80     416    
-256   -192   
-144   -144   
-368   -48    
64     176    
-208   -16    
-144   32     
-16    -144   
-400   80     
-64    -80    
-1456  -80    
160    176    
32     32     
-48    -48    
112    -128   
0      0      
-144   -352   
-32    -32    
64     -96    
-176   192    
240    48     
-96    0      
-160   -32    
-304   -32    
-80    16     
-64    32     
144    64     
-1120  112    
-192   -16    
160    176    
-112   48     
64     192    
144    80     
-176   -192   
80     0      
80     96     
48     208    
-32    16     
16     0      
-96    0      
96     144    
-64    32     
-128   32     
-32    16     
-272   -16    
-112   224    
144    -64    
128    16     
-144   -64    
-512   -320   
432    -32    
80     144    
-304   80     
96     64     
-176   80     
-208   160    
192    176    
-128   0      
-16    96     
-640   64     
-48    176    
0      -96    
64     128    
16     -80    
-272   96     
240    128    
-176   0      
32     16     
-304   -416   
16     -48    
-128   64     
-96    48     
32     96     
-112   96     
-592   -96    
-32    320    
16     -96    
48     80     
0      -16    
32     -48    
144    128    
-400   -48    
192    -80    
-112   -16    
128    144    
80     112    
-176   208    
-64    288    
-208   -64    
-208   -48    
256    400    
-560   32     
-320   -864   
-80    -592   
224    176    
-144   48     
112    160    
-304   48     
16     80     
-176   -144   
48     304    
112    320    
-256   -128   
208    144    
-128   -160   
-176   32     
48     -16    
64     -64    
-96    16     
-144   96     
320    192    
128    192    
-16    160    
48     128    
-96    32     
-272   -112   
208    208    
64     256    
128    336    
-192   96     
-368   -160   
-416   -64    
-112   -64    
176    112    
-32    288    
-144   144    
-48    -96    
96     -144   
80     -80    
-160   144    
112    32     
-64    -48    
0      16     
64     192    
-64    -32    
48     160    
-208   -240   
480    16     
-128   16     
240    352    
32     656    
112    0      
-16    -32    
-16    16     
144    336    
0      240    
-160   208    
-64    256    
64     16     
-80    208    
-80    -64    
-64    32     
-80    112    
-80    -384   
288    16     
-192   208    
112    0      
-96    64     
160    80     
-48    128    
-64    16     
48     48     
-256   -96    
32     -16    
-144   -160   
64     16     
96     32     
32     -32    
-112   -176   
304    208    
-48    384    
32     64     
64     64     
64     272    
32     112    
-48    32     
80     128    
-128   0      
48     -416   
-80    -304   
0      0      
176    48     
-112   368    
16     -48    
80     -80    
-32    -112   
-16    -80    
-32    464    
-64    -864   
-16    -336   
32     -64    
-112   -240   
256    96     
64     80     
-208   128    
240    80     
-80    64     
144    16     
-176   112    
160    96     
-32    80     
-16    16     
16     80     
0      16     
-16    -256   
-64    -320   
272    352    
64     608    
-48    128    
256    -96    
32     48     
112    -32    
128    128    
80     128    
128    80     
288    480    
-240   96     
0      -64    
112    352    
16     0      
-48    48     
96     176    
-160   -80    
80     -48    
16     512    
0      -816   
0      0      
-32    32     
144    256    
-64    160    
16     0      
-48    -80    
64     176    
-96    -16    
-128   288    
144    -432   
-384   -96    
240    48     
-208   400    
192    -720   
-112   -1296  
304    160    
-112   208    
32     128    
-32    48     
112    144    
-16    0      
256    176    
-256   -32    
16     320    
48     176    
-32    -32    
192    176    
-64    -144   
-32    -64    
128    -320   
32     176    
160    -1072  
-112   144    
240    -160   
-16    32     
-48    80     
144    0      
-48    -144   
192    48     
-16    -176   
96     -192   
240    -240   
-96    -560   
-80    -336   
112    -224   
96     176    
0      64     
-48    128    
-48    -144   
240    160    
-144   16     
368    320    
-464   224    
160    0      
-32    -80    
176    -208   
-16    224    
-144   -144   
64     -96    
48     -256   
608    640    
-624   64     
96     -208   
32     -1968  
128    240    
128    272    
-128   16     
208    176    
96     192    
-80    0      
224    -144   
-208   -576   
-32    -352   
256    240    
32     -64    
-80    16     
272    -448   
16     176    
80     -192   
0      64     
-16    -160   
80     -48    
64     0      
-64    112    
-80    32     
96     -384   
96     128    
192    -16    
32     64     
-80    0      
-176   -192   
368    -400   
0      -96    
0      -176   
80     144    
-144   80     
-64    32     
112    80     
208    288    
-272   -16    
-272   -192   
544    64     
-224   -224   
-176   -32    
48     -272   
176    -112   
160    32     
-80    16     
192    0      
-64    96     
32     80     
96     128    
176    128    
-384   48     
272    304    
-128   -128   
496    -240   
-288   -80    
32     192    
48     -128   
160    160    
80     -224   
-64    96     
160    -112   
80     -1056  
16     48     
16     144    
96     160    
144    16     
-144   -416   
-48    -112   
-192   -384   
192    16     
144    -896   
-64    0      
176    80     
-128   -144   
0      32     
-80    0      
128    -48    
176    192    
80     0      
-96    -224   
-432   -128   
0      -96    
32     -48    
144    0      
-160   -48    
208    -496   
-176   -480   
32     -2512  
224    0      
-128   -32    
80     80     
80     -32    
64     80     
16     -352   
-112   -160   
-144   -192   
-224   304    
672    480    
-272   -16    
32     -112   
32     -128   
176    -80    
0      -336   
48     -16    
272    -128   
-208   48     
80     -272   
160    -16    
160    192    
-96    144    
-64    -16    
208    -48    
-416   -144   
-48    -384   
224    -16    
-48    -96    
192    16     
128    -16    
-176   32     
16     -304   
32     144    
0      -64    
288    304    
-160   288    
80     192    
-256   16     
-160   -368   
-32    -144   
48     -96    
-1200  16     
16     -80    
-352   -32    
112    -336   
-16    176    
48     -832   
-48    -32    
240    80     
-48    112    
-288   -48    
160    48     
-288   16     
80     -48    
-16    -32    
16     -48    
-416   -112   
128    -32    
-64    -48    
160    -160   
-32    64     
112    -224   
-16    96     
80     -32    
48     -272   
-160   -48    
144    -16    
-144   -32    
160    96     
-64    128    
-80    -96    
64     16     
32     -160   
48     48     
64     -176   
0      48     
-16    16     
192    160    
-160   0      
208    -16    
-256   32     
-336   -784   
352    -32    
-48    96     
-576   -176   
192    -496   
-368   -416   
176    176    
256    64     
-80    -176   
144    -32    
176    -320   
112    48     
-128   144    
-16    208    
80     192    
32     160    
16     16     
96     32     
-128   240    
-16    48     
32     64     
192    144    
-96    48     
224    96     
16     -80    
-1888  0      
-272   544    
16     240    
-112   1040   
128    176    
-1168  64     
-32    -48    
-16    -368   
-32    112    
144    112    
32     16     
-288   -176   
256    -192   
-400   -256   
144    96     
48     -112   
-224   -192   
176    464    
-176   512    
-336   -256   
-352   -320   
80     608    
-32    288    
-240   -304   
48     32     
-112   32     
-384   -320   
-64    -32    
352    144    
-416   -16    
256    0      
-112   48     
-288   -272   
48     176    
-176   -48    
-160   -16    
-112   80     
-80    16     
-160   -112   
-352   256    
160    -304   
16     320    
-80    336    
-80    -96    
-48    48     
-32    160    
-272   -144   
96     -224   
16     400    
96     400    
32     -112   
-192   -208   
-304   -368   
128    256    
208    272    
64     -208   
16     -16    
16     336    
96     -336   
-128   128    
-80    32     
-192   32     
464    480    
-480   -160   
-240   -560   
176    -176   
-112   48     
-224   48     
96     48     
-896   -208   
416    112    
-288   -48    
144    96     
-32    -160   
-80    48     
240    208    
-16    368    
-48    -96    
-432   -464   
80     -176   
-80    -224   
-176   544    
240    160    
0      16     
-240   208    
80     208    
-256   -16    
160    320    
176    224    
-48    432    
80     144    
-208   -576   
128    -256   
-144   160    
0      64     
64     -96    
16     -48    
224    112    
-336   224    
-64    -48    
-128   16     
-320   -448   
128    176    
16     336    
-32    0      
128    80     
-128   48     
-112   64     
160    64     
112    32     
-128   -16    
-32    96     
-128   -64    
48     80     
-224   -48    
80     80     
-224   64     
-16    208    
-192   256    
288    448    
-352   -16    
32     -208   
304    496    
-16    720    
-240   -704   
304    -192   
-144   848    
-144   -320   
128    224    
48     192    
0      -256   
-240   -192   
176    48     
-80    112    
16     -160   
80     352    
112    -144   
-32    64     
176    -48    
-48    224    
-208   144    
32     0      
-80    240    
-96    160    
-144   -32    
-32    320    
80     32     
-272   -512   
-80    176    
160    288    
-80    176    
0      -224   
32     -112   
-128   32     
336    160    
-144   32     
64     32     
-48    224    
0      48     
-112   -16    
256    368    
-208   368    
32     272    
128    128    
-32    48     
112    -32    
-208   -80    
112    16     
-272   368    
208    208    
-64    32     
96     96     
-144   -16    
240    112    
-64    -144   
32     16     
-32    96     
128    160    
-64    -16    
96     336    
128    96     
-48    16     
256    16     
32     96     
64     64     
-48    -32    
144    48     
-128   -96    
176    64     
-16    80     
288    320    
-352   -32    
240    144    
-16    16     
32     64     
80     96     
288    384    
-208   304    
-272   -48    
64     64     
-272   208    
416    -32    
-528   -80    
496    112    
-32    32     
-64    128    
112    112    
-80    144    
-160   -32    
208    144    
112    336    
-224   208    
112    32     
-336   -48    
224    32     
144    80     
176    96     
-144   -48    
32     64     
-112   48     
32     48     
-128   0      
128    112    
112    -64    
-176   -128   
128    -16    
-128   -64    
160    96     
224    160    
-240   -128   
-112   -128   
96     -48    
-144   -80    
-80    -272   
-64    112    
48     -1344  
32     208    
-64    192    
32     80     
-192   64     
32     144    
-80    48     
80     96     
-96    16     
256    64     
64     -16    
112    32     
272    128    
64     -176   
32     32     
128    -288   
96     144    
-352   96     
-32    -16    
-64    -16    
416    224    
-160   192    
-16    192    
-64    -240   
80     80     
16     -80    
16     144    
0      64     
-32    64     
16     48     
16     48     
128    112    
288    -1104  
-256   112    
-64    -352   
0      96     
16     160    
0      96     
-80    16     
144    32     
-64    -32    
176    -32    
128    176    
112    -16    
-128   80     
-32    -304   
192    16     
240    -288   
16     112    
-112   -320   
224    224    
-224   -144   
80     192    
160    -48    
-16    112    
32     96     
16     -128   
96     112    
-32    -112   
80     80     
0      -240   
32     32     
128    -288   
-160   96     
304    -560   
32     144    
32     32     
-80    96     
240    80     
64     64     
0      96     
144    128    
-160   96     
80     0      
192    96     
32     -208   
16     32     
-48    -32    
80     80     
144    -224   
96     -48    
80     -112   
0      96     
128    368    
80     208    
-32    64     
160    -272   
112    128    
80     -96    
-32    16     
224    -624   
192    96     
-128   16     
48     192    
128    -1888  
0      -16    
48     64     
80     32     
0      0      
0      -192   
320    368    
0      288    
-16    208    
-48    -160   
48     96     
-64    -400   
-32    144    
416    672    
0      96     
0      16     
-48    -2528  
96     368    
96     -1408  
176    304    
-304   208    
176    256    
16     208    
-48    96     
64     -160   
64     176    
128    64     
32     112    
160    16     
-128   16     
-48    -672   
-48    -560   
112    320    
96     96     
-96    -288   
-416   -208   
48     -192   
16     0      
64     -48    
80     176    
-48    -592   
48     -608   
128    80     
16     -400   
144    -80    
192    528    
0      -160   
160    -256   
64     288    
368    -928   
-624   16     
176    -32    
16     0      
128    160    
-128   48     
64     -624   
160    64     
48     -384   
-64    -176   
-96    -592   
240    560    
-48    32     
96     128    
-48    80     
224    160    
-208   288    
-64    -336   
240    192    
-160   64     
496    -208   
0      0      
112    -208   
240    -256   
16     48     
48     176    
-128   0      
-16    -208   
208    240    
-112   272    
160    256    
-256   144    
64     -240   
-496   -224   
-112   48     
-32    -224   
-320   -704   
-96    -128   
-112   -16    
48     -80    
0      -544   
320    160    
352    320    
-144   144    
48     -192   
32     176    
-32    -64    
-16    0      
-32    0      
96     -80    
-272   64     
-16    48     
-128   160    
432    -176   
48     240    
288    272    
288    192    
-240   -256   
368    -304   
-80    -288   
480    320    
-336   656    
448    -640   
-352   464    
0      -272   
192    -112   
-32    96     
-672   112    
32     -464   
16     -240   
224    48     
-48    432    
96     -160   
-48    64     
-112   -64    
160    48     
-304   128    
-16    -112   
-80    16     
336    336    
-800   -304   
112    -432   
32     192    
-48    -208   
32     -80    
224    -32    
-80    352    
-80    -224   
128    48     
-224   32     
224    -16    
-80    80     
112    32     
-80    -16    
-32    -336   
-272   80     
-96    -320   
240    32     
592    784    
-160   1472   
-288   -1008  
336    -256   
-288   576    
144    -944   
128    416    
-96    -464   
304    160    
-176   608    
48     -672   
32     -64    
192    128    
-80    272    
0      32     
-304   -192   
-176   144    
-64    -352   
-464   0      
128    -304   
-416   80     
-192   -256   
-32    352    
-208   -160   
64     -160   
-80    48     
-16    -400   
-64    128    
96     -112   
80     48     
-208   -112   
-48    80     
80     96     
-80    96     
0      0      
32     48     
192    -112   
-464   -352   
-16    32     
-592   -160   
480    592    
-48    352    
-448   -400   
-48    -48    
80     96     
-144   -64    
336    336    
-32    64     
-32    -16    
-48    464    
-96    256    
-208   80     
-176   -48    
0      128    
-480   0      
48     96     
-448   64     
-96    96     
32     -80    
64     48     
64     -96    
48     48     
-32    96     
-384   -64    
0      64     
-176   48     
32     112    
-64    64     
-288   -96    
-336   32     
-64    -176   
-1520  -176   
240    64     
-208   0      
-32    -112   
-32    -192   
-80    32     
-128   -16    
48     64     
0      112    
-80    32     
96     112    
-32    48     
-176   80     
80     0      
-128   0      
-48    96     
-112   -144   
480    -368   
-208   -128   
480    432    
-384   192    
144    288    
-32    176    
-144   32     
-16    -96    
-144   -32    
16     -112   
16     -16    
-32    -16    
0      64     
-432   -16    
112    0      
-16    -48    
-80    112    
-96    96     
16     -16    
-80    -16    
80     80     
-272   -288   
-112   -240   
16     -160   
-128   64     
256    128    
-256   -288   
48     80     
-80    -64    
-288   16     
304    -320   
-160   -256   
80     -96    
-32    -144   
48     -240   
224    0      
32     96     
272    272    
-256   16     
-144   48     
-208   -64    
-272   -288   
-176   -432   
-192   -432   
64     336    
-416   272    
-144   304    
192    48     
-336   320    
208    512    
-208   272    
-16    -112   
-144   -192   
32     16     
64     48     
32     96     
-80    64     
80     -16    
16     176    
96     352    
-160   352    
-48    -32    
48     -112   
-176   -352   
128    -16    
80     128    
128    160    
-224   64     
32     -64    
80     -32    
144    112    
-192   -64    
256    192    
32     64     
0      128    
-48    16     
-32    48     
192    96     
-160   48     
48     80     
176    32     
-96    80     
48     192    
-208   32     
-64    48     
80     160    
-16    0      
304    224    
-512   -32    
192    128    
64     80     
144    96     
-64    48     
-80    64     
112    96     
-96    32     
96     64     
128    80     
-112   144    
0      80     
-48    80     
-16    320    
272    64     
-144   32     
32     128    
96     48     
0      64     
-32    -80    
96     128    
208    0      
16     80     
-160   16     
64     128    
32     16     
-48    -16    
32     128    
-64    0      
192    256    
-160   112    
80     64     
80     -48    
32     32     
112    64     
0      80     
112    64     
-48    48     
32     112    
64     64     
-16    0      
16     0      
16     48     
48     -32    
32     80     
112    112    
128    16     
-16    16     
112    240    
256    192    
-192   112    
224    80     
-80    16     
112    48     
-48    16     
112    48     
-240   -368   
288    16     
-48    80     
224    -288   
-144   -64    
-112   -16    
208    -272   
-112   -256   
112    80     
64     96     
48     112    
32     64     
96     48     
-96    -240   
64     48     
112    0      
64     96     
32     128    
-112   -624   
64     128    
112    -720   
48     304    
16     32     
48     -160   
80     288    
48     304    
-48    -32    
96     160    
-112   -368   
208    -16    
-224   -64    
96     -752   
144    48     
-64    -560   
256    288    
-112   368    
-16    0      
-80    -144   
144    160    
-176   16     
-16    -32    
64     -80    
-16    160    
144    16     
-144   112    
-48    -32    
-112   -336   
-48    -80    
96     -32    
-48    176    
80     -864   
32     128    
16     -1952  
-48    112    
64     112    
-224   -352   
160    144    
32     208    
-64    -112   
128    240    
-144   208    
128    64     
48     96     
-16    64     
32     -112   
-80    -192   
384    160    
-112   -320   
112    -64    
64     64     
96     112    
592    560    
-288   688    
64     416    
48     352    
48     320    
624    80     
-288   416    
48     -64    
144    48     
128    -208   
112    112    
-144   -64    
208    -144   
-160   -416   
224    208    
-64    -16    
224    128    
112    336    
320    160    
-80    32     
208    -416   
304    336    
96     0      
48     -176   
192    -80    
-288   -96    
112    -544   
-208   16     
16     -64    
-80    32     
112    416    
64     -48    
-304   -160   
-96    -480   
256    -80    
-112   320    
128    -32    
256    96     
-144   160    
128    -128   
-144   -144   
384    -112   
0      64     
112    -32    
176    64     
144    112    
16     -832   
112    -256   
320    64     
16     80     
80     96     
-64    -32    
-240   -592   
256    96     
-16    -288   
320    736    
-128   -64    
192    80     
208    256    
-48    -384   
-128   -208   
208    -656   
128    112    
128    -128   
-96    -784   
480    -832   
128    736    
-192   -304   
208    -240   
-64    224    
96     -48    
112    224    
-64    -624   
304    464    
-64    48     
-288   -496   
240    -80    
208    -16    
-336   288    
-176   -128   
48     -464   
176    -224   
176    240    
-80    112    
192    -16    
-16    384    
112    144    
64     -432   
-48    304    
16     -32    
-48    272    
48     400    
-80    -16    
-176   -240   
176    192    
-16    304    
128    -224   
-16    -32    
0      -400   
0      64     
112    -1616  
64     -96    
176    -304   
-64    -96    
32     80     
256    112    
-272   160    
16     -80    
48     16     
-208   -144   
-32    -48    
96     80     
224    -128   
-144   -112   
144    208    
-16    -368   
-48    -16    
144    0      
48     112    
112    -80    
0      16     
-112   -48    
160    -16    
-64    -160   
224    352    
-880   16     
320    -32    
0      -16    
160    16     
16     144    
-48    -336   
272    80     
16     -944   
224    160    
80     -80    
16     -144   
96     32     
96     -16    
80     0      
-80    -240   
80     -224   
96     -224   
-464   16     
48     16     
208    32     
-128   -256   
64     16     
32     -672   
96     -16    
-16    32     
96     -144   
64     0      
176    64     
-192   64     
-96    -112   
-256   80     
64     -64    
-144   -32    
-48    -32    
128    -16    
112    -256   
16     16     
112    -672   
16     64     
16     -16    
64     -96    
16     64     
96     80     
0      96     
32     64     
-144   48     
-64    -112   
80     -80    
96     64     
-32    272    
64     128    
32     256    
-32    48     
160    80     
-544   96     
256    16     
-80    208    
48     16     
-96    -64    
176    16     
-64    80     
-112   -16    
-304   -80    
-112   -112   
80     -64    
64     -112   
32     -16    
-880   -192   
-1200  -80    
48     -176   
-112   -272   
-48    32     
208    80     
-48    -16    
-16    -112   
-240   16     
64     96     
-112   64     
-1024  -240   
16     112    
-48    -256   
-96    -32    
0      -64    
-192   -16    
192    192    
-624   64     
-32    32     
-848   -128   
-96    -128   
-32    -32    
64     64     
-400   96     
64     192    
0      80     
96     32     
-112   -224   
-176   -144   
160    0      
-160   -128   
16     -352   
-384   -32    
160    144    
-224   -64    
112    32     
-1664  176    
80     80     
-256   112    
192    144    
-416   -112   
176    48     
-112   -160   
-16    144    
176    112    
-160   -48    
144    80     
-464   16     
96     -80    
-240   -32    
16     -16    
-112   0      
-240   16     
80     -80    
32     96     
-112   -16    
208    64     
-32    -128   
256    112    
-16    32     
-144   64     
176    16     
-80    96     
64     0      
-64    32     
-32    32     
-112   160    
-16    96     
-496   -112   
0      32     
16     -64    
96     -80    
32     96     
64     32     
-64    80     
-192   -16    
352    256    
-96    48     
112    32     
0      0      
80     48     
-144   -16    
96     112    
-624   -96    
128    96     
128    16     
-144   80     
96     160    
-208   -64    
32     -208   
160    176    
160    128    
-192   -48    
-80    32     
-144   -176   
128    -128   
-96    -144   
80     0      
-176   -32    
80     96     
-256   -80    
192    224    
-240   -128   
-16    16     
-64    256    
192    96     
0      -48    
-16    -48    
-64    0      
144    32     
-80    128    
0      80     
64     144    
-160   16     
32     128    
-800   -48    
16     128    
-32    336    
144    992    
32     -336   
-384   -688   
288    1024   
-144   -128   
64     -64    
80     304    
-112   16     
-128   -96    
32     96     
-64    0      
64     80     
-32    112    
64     32     
0      64     
-32    80     
-144   80     
-144   -608   
272    -368   
-112   416    
0      -608   
-32    432    
80     -80    
-96    112    
128    208    
-144   -128   
-32    96     
16     -112   
32     304    
32     -16    
-80    32     
240    192    
-432   -672   
256    48     
-80    192    
-32    32     
80     80     
-64    64     
96     96     
-16    64     
32     -128   
-48    -208   
208    464    
-16    144    
32     112    
-48    -80    
0      0      
64     32     
-96    16     
112    320    
144    304    
128    144    
-32    480    
160    160    
32     -144   
-176   -80    
-48    -80    
80     64     
-32    96     
48     96     
-128   -128   
160    112    
-208   96     
128    32     
-80    32     
64     80     
-32    32     
160    128    
-208   -64    
-80    16     
176    368    
32     224    
176    432    
80     352    
-80    32     
-80    48     
64     0      
-80    -112   
128    -64    
-48    -176   
-96    32     
176    48     
-96    80     
-16    176    
304    384    
-112   176    
208    240    
-272   80     
128    -240   
96     64     
0      64     
-96    240    
-16    368    
-16    -32    
-112   368    
192    272    
-288   -32    
-288   -144   
16     -96    
-336   -416   
-32    -416   
16     448    
-64    -48    
96     16     
112    336    
-64    64     
-112   -96    
16     96     
480    640    
-464   288    
96     16     
48     -128   
368    144    
-32    112    
48     -80    
288    112    
0      96     
128    -48    
-240   -288   
-96    -720   
-16    880    
176    -112   
-64    32     
96     208    
144    64     
0      80     
288    192    
352    720    
-128   368    
400    -192   
-80    272    
592    -224   
-336   -368   
128    -368   
432    336    
-208   320    
160    240    
16     -320   
-480   -864   
-16    -480   
-96    -208   
-208   -144   
112    208    
224    256    
-240   0      
-160   -144   
400    -320   
128    -80    
48     32     
448    592    
224    816    
-112   368    
16     0      
64     16     
32     160    
-32    368    
192    144    
-224   -112   
112    144    
32     -96    
32     32     
-144   -256   
32     112    
80     -736   
-48    208    
64     272    
-16    -48    
0      -144   
64     -224   
-96    -32    
192    304    
-96    144    
16     -16    
112    32     
96     -208   
32     32     
80     80     
288    128    
-16    -688   
48     208    
112    -288   
48     -48    
0      0      
144    160    
-48    160    
80     128    
-128   32     
128    -32    
160    160    
144    192    
-48    48     
-64    -320   
208    144    
-112   -96    
160    64     
-112   -464   
48     128    
64     80     
112    112    
-48    80     
160    400    
176    0      
-64    -208   
144    160    
64     -144   
-16    112    
384    160    
-272   160    
96     -208   
96     -368   
-16    -80    
64     -16    
-16    144    
176    224    
-64    -80    
64     272    
48     96     
80     -80    
-160   48     
160    32     
64     112    
48     -48    
80     -32    
32     -304   
96     48     
128    0      
64     -32    
0      16     
144    -560   
-112   -32    
-32    -64    
160    -1440  
-96    -16    
48     -1680  
128    -160   
208    336    
-208   -224   
32     112    
160    -144   
48     176    
96     -64    
32     -320   
0      16     
32     -528   
192    -64    
-1184  -16    
128    160    
-112   -48    
0      -576   
112    -144   
-160   192    
16     -128   
32     112    
16     -48    
256    112    
16     144    
192    48     
-32    80     
0      -384   
-48    -464   
-144   0      
-80    -192   
160    -64    
-16    -272   
96     -48    
32     -448   
48     -96    
0      96     
-16    16     
368    224    
-64    192    
-16    32     
48     144    
-112   -16    
-48    -128   
-160   -240   
-16    -224   
-48    -112   
96     48     
192    -48    
64     -240   
128    -32    
-128   -1312  
-304   -64    
48     80     
112    112    
-64    -160   
96     112    
-304   -80    
0      16     
-176   -16    
96     48     
-592   -32    
48     96     
-64    -400   
-160   -592   
160    64     
-112   -512   
0      16     
112    160    
256    0      
0      -16    
192    -80    
-96    -32    
64     -48    
128    -16    
96     -16    
-368   -16    
352    16     
-352   0      
112    -64    
16     0      
96     -208   
320    384    
-352   -1200  
64     -16    
224    16     
-144   -192   
32     -192   
0      64     
0      0      
32     -48    
-592   -32    
-16    -144   
-400   -48    
112    -96    
192    208    
-224   -208   
112    96     
112    -1488  
32     80     
32     32     
0      -160   
112    80     
16     32     
-336   -48    
0      -16    
-16    32     
-64    -176   
-96    16     
192    80     
-112   144    
-144   -144   
64     32     
80     112    
208    128    
-240   -80    
176    -48    
-544   -16    
-32    -256   
256    208    
-352   64     
-64    -16    
-48    -112   
416    -160   
16     -16    
-112   64     
144    -208   
-176   64     
192    -144   
64     144    
-48    80     
-160   -32    
-240   32     
160    208    
-208   224    
176    128    
-48    -64    
176    -48    
-384   32     
112    -32    
0      192    
-96    176    
-112   128    
-1152  -208   
-160   176    
32     128    
-592   96     
64     272    
-128   336    
16     -80    
128    48     
-240   128    
48     64     
-32    -112   
-528   0      
112    -32    
-384   128    
192    -240   
-64    192    
-96    -32    
0      128    
-176   80     
-48    208    
-112   48     
224    192    
-336   96     
-240   128    
48     -560   
64     -64    
48     96     
208    208    
-240   -160   
-16    112    
144    48     
-112   0      
32     64     
-96    32     
-80    16     
-240   -96    
-112   0      
-736   0      
-48    32     
0      48     
32     0      
-80    -288   
-32    16     
112    -336   
-192   176    
32     16     
-80    112    
112    96     
240    320    
-416   304    
64     -112   
208    32     
-368   160    
32     -80    
-864   -240   
272    112    
-112   48     
144    208    
16     0      
112    64     
-16    96     
-160   -32    
192    96     
-96    80     
64     80     
-48    16     
96     80     
-448   -48    
144    80     
-1088  -96    
16     -112   
-160   -240   
144    -160   
-112   -192   
-80    -400   
288    -368   
144    64     
48     96     
-32    32     
112    96     
-128   0      
-64    -32    
-496   -256   
208    -80    
-288   144    
-80    144    
64     -64    
-96    80     
160    48     
-16    112    
-64    -16    
-64    -352   
-176   -608   
320    -16    
-240   144    
-80    0      
-64    -16    
-112   0      
96     -32    
-112   -128   
16     112    
-768   -48    
48     688    
64     496    
-176   -560   
48     -128   
-48    240    
304    608    
-336   48     
-256   -496   
-48    -160   
512    624    
-544   32     
320    -288   
-464   64     
256    128    
-1104  -144   
208    16     
176    192    
-240   -368   
112    176    
-176   80     
-48    48     
464    896    
-464   -112   
-112   -480   
-32    -224   
-384   -208   
0      -32    
-224   192    
160    528    
-256   224    
80     208    
-160   -288   
48     -128   
16     -112   
64     -144   
-16    144    
32     112    
96     -208   
-112   0      
512    640    
-432   272    
192    192    
-64    176    
160    144    
-32    48     
112    -16    
240    -16    
-32    208    
224    144    
-144   80     
64     128    
-32    -240   
-64    -64    
-48    32     
-224   -112   
256    -32    
80     192    
-48    -64    
0      64     
128    272    
-256   176    
96     48     
-144   -96    
144    48     
-128   96     
32     80     
-128   16     
64     16     
-80    -48    
-112   -16    
224    -48    
-32    144    
368    -32    
-288   96     
288    128    
96     176    
-128   64     
128    64     
80     80     
128    16     
-80    32     
32     48     
128    128    
48     32     
0      128    
16     0      
128    80     
64     176    
32     -32    
128    48     
128    288    
160    -32    
-16    64     
80     128    
-64    -112   
176    -48    
336    656    
-272   432    
-112   -32    
48     -112   
144    -32    
96     -1232  
-192   48     
128    80     
-16    128    
0      176    
144    192    
-176   -128   
32     64     
112    160    
-48    0      
0      80     
0      32     
-112   -48    
80     160    
32     32     
-96    -336   
144    320    
112    96     
0      112    
48     320    
320    0      
-48    32     
32     128    
160    112    
-112   16     
32     80     
32     144    
96     352    
320    80     
-384   -16    
320    -16    
-160   112    
80     -336   
112    80     
-144   -32    
144    32     
-176   16     
192    64     
32     48     
128    176    
-160   272    
0      16     
240    96     
32     112    
-64    64     
160    -384   
64     80     
-16    -560   
128    -96    
112    48     
96     64     
64     64     
96     -16    
-16    -48    
288    288    
-240   112    
32     144    
160    112    
0      -144   
144    48     
112    -128   
112    48     
64     -208   
80     128    
96     144    
384    384    
-288   -64    
-80    176    
512    112    
-16    128    
-16    0      
160    80     
-32    -16    
96     -16    
32     160    
32     -144   
-64    0      
192    64     
112    96     
-64    -64    
320    144    
-192   -64    
224    96     
-32    48     
96     128    
128    48     
-176   144    
272    16     
160    96     
-144   208    
96     -16    
-112   80     
224    -144   
-192   96     
32     -448   
208    48     
-112   -128   
448    176    
-192   64     
128    32     
80     32     
80     144    
48     80     
-16    48     
96     112    
-16    -512   
-16    160    
-160   -336   
272    240    
-64    48     
80     112    
-32    96     
160    128    
160    144    
-176   192    
32     16     
16     -368   
96     96     
0      -400   
32     80     
80     -96    
0      32     
32     16     
16     -16    
-16    -128   
0      80     
112    160    
-256   -16    
400    -272   
48     -400   
0      80     
0      -320   
-64    -208   
400    -176   
48     256    
256    304    
-272   80     
176    -240   
-16    160    
160    -112   
-256   -688   
-64    -304   
352    288    
-112   208    
-176   -1056  
144    -400   
-16    -64    
-192   -304   
288    -16    
128    -32    
64     32     
-48    288    
48     -384   
144    64     
240    48     
-160   80     
0      -80    
384    -96    
-336   512    
-48    176    
160    -96    
-464   112    
0      -176   
48     272    
272    368    
-16    144    
0      -384   
-160   -16    
368    144    
-256   -144   
-96    -640   
0      -96    
240    -16    
-128   112    
-32    96     
128    -144   
-16    0      
80     -336   
96     16     
48     -560   
144    160    
-32    -400   
144    -144   
-64    -1296  
128    208    
-96    -480   
-384   -1056  
384    208    
0      176    
-336   0      
304    64     
-624   -192   
192    112    
-464   -16    
288    -144   
-48    448    
128    128    
80     -368   
144    -320   
-32    240    
-144   -80    
112    -80    
-96    -48    
48     -480   
64     -208   
112    48     
0      -112   
80     -176   
112    112    
-16    64     
176    80     
-48    -240   
-336   208    
64     -464   
64     48     
240    336    
-192   240    
-32    160    
144    -320   
-208   -64    
-128   64     
128    -32    
-160   48     
-64    -48    
-32    -112   
-816   -32    
-32    -80    
48     0      
160    -256   
-32    80     
48     -1984  
16     64     
-48    160    
0      0      
-32    176    
-32    -176   
208    -208   
0      -64    
-64    112    
-64    64     
-80    192    
48     48     
-208   -320   
128    -496   
32     48     
112    -336   
-144   -112   
192    64     
144    0      
-208   64     
96     -16    
-16    0      
-32    -64    
-48    16     
0      48     
32     96     
16     -144   
-32    128    
64     32     
-32    -16    
112    -288   
-32    -16    
-32    16     
-112   -16    
-80    -208   
80     -192   
112    1008   
160    800    
-144   256    
112    336    
-96    -32    
-80    -464   
-112   32     
112    -368   
32     64     
-128   0      
-624   -80    
-48    -48    
-368   112    
-160   0      
80     -80    
-48    112    
192    80     
-144   16     
320    496    
-256   288    
-256   -416   
192    -176   
-304   736    
16     -272   
-32    -80    
-128   464    
-224   -416   
-224   192    
208    896    
-672   240    
-144   -208   
-32    -304   
-160   16     
-160   -288   
64     240    
-160   -96    
112    240    
-112   -112   
128    160    
48     720    
-384   -128   
160    192    
-336   432    
80     288    
-304   192    
-112   -160   
-720   -256   
-112   -352   
-160   -256   
16     -96    
-224   -480   
304    -528   
-272   -192   
240    272    
-176   304    
16     208    
32     64     
-48    144    
-240   -256   
-64    80     
272    224    
-752   64     
288    48     
-64    16     
208    224    
-592   -96    
128    96     
-240   -256   
-160   -272   
336    -176   
-288   208    
432    112    
-352   0      
192    112    
-144   0      
80     80     
80     192    
128    32     
-1712  32     
32     -64    
-48    -128   
304    112    
-32    128    
-64    -48    
176    48     
-368   0      
160    112    
-144   -80    
192    224    
-352   -32    
80     128    
-512   -32    
-48    32     
-1056  -160   
144    80     
144    80     
-16    368    
-208   16     
64     48     
-80    -32    
304    96     
-192   0      
112    16     
32     48     
64     160    
-48    -80    
-240   -80    
240    80     
-96    32     
32     96     
-64    64     
-16    -16    
16     112    
-32    80     
80     64     
-32    48     
64     112    
-160   48     
128    144    
-112   -16    
32     64     
-144   -32    
64     0      
-144   0      
208    96     
-1600  -176   
-304   -48    
80     96     
-176   -48    
80     48     
80     160    
-144   64     
-96    0      
64     64     
-96    -96    
64     96     
32     112    
-96    80     
-208   -64    
16     112    
-64    -16    
128    192    
-128   48     
32     64     
64     64     
-48    16     
80     144    
-80    48     
112    -128   
-144   0      
160    80     
-176   -48    
-16    32     
16     -64    
-32    96     
48     64     
-32    112    
400    368    
-352   256    
80     128    
-48    -32    
80     80     
80     224    
-176   -160   
-80    -64    
208    -48    
-384   -112   
144    80     
-32    80     
80     176    
48     80     
64     96     
48     160    
-64    48     
-32    224    
240    144    
-176   80     
208    176    
-208   128    
-16    -48    
-112   160    
-64    -16    
48     128    
-128   -16    
48     16     
-80    96     
16     32     
-64    176    
48     0      
160    96     
80     80     
32     32     
96     80     
48     96     
48     128    
64     96     
112    96     
192    48     
-112   -16    
32     32     
272    80     
-80    32     
144    16     
-48    -64    
144    80     
-48    32     
-112   16     
64     112    
-48    208    
160    112    
-16    80     
16     128    
-128   64     
-96    0      
288    48     
-16    64     
-32    144    
208    112    
-16    64     
96     96     
-96    64     
-96    -64    
256    32     
-48    176    
160    144    
48     112    
-176   -256   
-96    -1232  
256    224    
-96    192    
-48    16     
64     -16    
112    48     
-32    -32    
16     96     
48     48     
-192   96     
80     64     
-112   -32    
80     -352   
448    752    
-176   352    
-144   -64    
160    448    
16     528    
-96    320    
-256   -112   
64     -208   
176    -48    
-16    160    
32     96     
48     128    
48     80     
48     208    
-64    96     
128    144    
-96    128    
-48    -320   
112    432    
-256   -880   
224    96     
32     -64    
272    192    
-160   224    
48     160    
-48    240    
-208   304    
-96    112    
80     0      
-112   0      
-112   16     
48     -16    
352    -576   
-16    208    
-80    -736   
-80    -256   
-16    16     
208    16     
-176   144    
64     48     
48     32     
384    224    
-272   128    
224    112    
32     272    
16     128    
-96    288    
144    -272   
16     160    
128    -16    
-16    -112   
0      0      
176    464    
-160   224    
-48    -672   
-32    -160   
432    384    
-256   -112   
336    -80    
-16    192    
48     -64    
208    64     
0      -80    
112    400    
-32    -560   
-208   -512   
160    -1728  
176    144    
-32    -384   
16     288    
32     48     
-48    64     
-192   -32    
320    144    
-80    96     
-80    -96    
304    160    
16     -16    
32     96     
144    -304   
48     48     
80     80     
0      240    
304    -368   
-32    96     
-192   -304   
64     -64    
304    432    
192    448    
-272   128    
80     -672   
-16    -16    
-224   -720   
224    -592   
-208   -224   
512    432    
304    880    
160    800    
-128   -192   
80     224    
240    544    
0      592    
112    32     
-112   -192   
128    -80    
-64    -896   
32     -400   
64     -192   
32     304    
-64    -224   
128    192    
224    -272   
-176   128    
144    -768   
0      80     
64     16     
-32    -848   
-16    80     
32     -160   
0      -144   
32     -160   
-16    -16    
368    16     
-208   48     
128    -240   
96     160    
-80    -624   
32     -1584  
16     -176   
80     -256   
0      -64    
320    -112   
272    0      
-272   400    
-32    32     
128    -112   
-32    256    
240    96     
-176   -1120  
96     -208   
64     80     
-48    -48    
64     -336   
0      -192   
-64    -240   
48     -192   
-224   208    
-208   -320   
-1424  240    
48     288    
0      -96    
16     80     
-48    -480   
-112   -1104  
112    -800   
80     320    
448    1120   
-48    -448   
-224   -16    
-16    -32    
176    -112   
-192   -96    
144    64     
-176   176    
112    160    
256    768    
-208   -480   
112    -32    
-48    -288   
-16    -32    
80     -576   
-32    16     
48     -48    
144    48     
-32    -160   
16     -176   
-16    96     
224    480    
-16    160    
-64    -80    
-368   128    
64     16     
112    -32    
0      -128   
272    80     
272    -1104  
-64    48     
128    192    
96     128    
-16    32     
64     -48    
-192   -128   
64     -192   
-208   -32    
-16    -304   
112    304    
-176   -144   
160    -128   
112    80     
0      64     
-64    -720   
16     144    
144    304    
32     176    
-176   -160   
208    -192   
-48    208    
-224   32     
-96    -176   
-64    -16    
16     16     
32     80     
-1120  -48    
32     -224   
112    80     
-64    -304   
176    -192   
0      -320   
224    128    
-128   32     
176    96     
-224   32     
-16    -208   
-128   -112   
16     -80    
-208   80     
0      0      
-320   160    
0      80     
48     112    
-16    -48    
-48    -96    
-16    -464   
32     -288   
-496   -32    
48     -32    
-432   0      
32     -64    
-128   -96    
80     32     
-160   -48    
-48    -32    
80     0      
-112   -224   
384    96     
112    -96    
-400   224    
208    -432   
240    112    
-272   -16    
256    -48    
-112   -80    
32     -48    
-96    0      
64     48     
0      96     
176    176    
32     -64    
-32    -144   
128    -64    
-144   -160   
64     32     
-256   160    
-192   176    
-64    224    
-224   160    
-128   32     
-144   -96    
176    32     
32     80     
224    144    
-160   -80    
16     64     
-752   -112   
48     176    
-464   -48    
0      48     
-128   128    
-176   0      
-208   -96    
-96    -64    
-80    -32    
-912   32     
-96    80     
96     -64    
-80    32     
16     -160   
-48    80     
-208   0      
-32    112    
-32    -64    
-48    80     
-32    -224   
-96    -32    
112    -48    
-80    -192   
-192   240    
112    0      
-208   16     
-736   32     
-32    -16    
16     -80    
-112   80     
0      -32    
128    320    
-128   -112   
-272   16     
0      80     
48     32     
-80    -32    
-96    0      
-112   -32    
-416   -16    
48     -80    
-1040  -96    
128    320    
-112   -32    
0      64     
48     -64    
192    0      
-288   0      
-32    -64    
-112   64     
144    112    
-128   -48    
-224   64     
64     80     
-176   -32    
-16    32     
-96    0      
-16    -96    
-144   -128   
16     64     
-48    -64    
112    176    
-80    192    
-80    64     
16     32     
80     -32    
-80    64     
48     64     
-48    48     
32     64     
176    144    
-112   32     
96     64     
-592   -64    
128    48     
0      16     
-64    16     
80     144    
112    -48    
-32    48     
-80    -128   
64     0      
-64    0      
48     32     
-64    48     
64     -16    
-240   -160   
160    16     
-352   -176   
240    128    
-96    48     
32     32     
128    64     
-240   -16    
64     688    
96     80     
-224   -144   
48     48     
-224   -160   
-16    -48    
-80    112    
96     16     
-16    32     
64     112    
0      96     
-32    -112   
16     -176   
0      224    
160    384    
-224   -368   
176    16     
-160   96     
-144   192    
48     96     
-256   -80    
112    48     
64     64     
-80    96     
-192   -32    
112    144    
32     208    
-256   -288   
480    560    
-192   368    
176    -304   
32     32     
0      368    
64     -272   
32     208    
-48    -304   
-160   160    
64     368    
-128   -48    
-272   -96    
0      32     
0      208    
-32    -96    
0      48     
-176   208    
0      -224   
128    160    
-16    64     
32     64     
80     224    
-96    144    
320    352    
-528   -384   
272    256    
-304   272    
160    368    
-96    -32    
48     -64    
48     224    
-224   -80    
256    128    
-96    48     
272    224    
-176   -48    
32     -160   
160    -48    
-80    -16    
-272   -64    
80     80     
176    32     
32     80     
352    256    
208    704    
112    432    
0      144    
176    -128   
352    -144   
192    544    
-64    -208   
448    32     
-176   256    
32     -128   
64     64     
16     128    
-32    -432   
528    336    
-320   656    
-144   -608   
112    -16    
208    176    
-16    16     
-48    -16    
16     512    
48     784    
-32    -32    
112    -144   
160    592    
-176   32     
-144   -240   
144    -208   
176    208    
0      224    
80     128    
192    96     
-112   0      
-112   128    
400    80     
-128   48     
0      48     
64     96     
80     192    
-240   -160   
128    -320   
-48    -880   
368    640    
-96    672    
-96    -256   
240    -288   
32     464    
-96    176    
128    -48    
0      208    
96     432    
128    -256   
-32    144    
528    688    
-544   -128   
96     -336   
0      -416   
32     160    
336    272    
-368   272    
16     -464   
80     -144   
528    1152   
-16    1264   
-112   256    
-224   -400   
-64    -800   
-320   -688   
224    336    
320    192    
-112   112    
-96    -80    
192    128    
-112   -1600  
64     80     
-16    112    
112    128    
-16    64     
48     96     
-256   -112   
544    256    
-128   -80    
-176   -16    
80     96     
-80    176    
16     -32    
96     -144   
-112   16     
128    -208   
64     240    
144    368    
32     -80    
48     48     
112    32     
0      -64    
80     176    
0      96     
64     -96    
112    112    
160    32     
-112   -192   
-80    -384   
160    32     
0      -176   
-192   -480   
80     16     
96     112    
16     160    
48     432    
-64    -64    
48     -384   
-48    -448   
0      -96    
-112   -400   
80     -224   
96     48     
-32    -96    
128    -48    
96     -240   
176    -32    
256    -176   
-144   80     
-96    -512   
16     -192   
240    96     
-80    96     
-16    16     
128    128    
112    112    
144    32     
80     144    
80     16     
80     176    
128    -208   
128    16     
16     -80    
64     96     
-32    144    
176    128    
64     16     
64     112    
-80    16     
-80    -64    
176    288    
-64    -384   
192    144    
0      -464   
16     64     
112    -176   
32     272    
16     -16    
160    160    
256    128    
-128   -112   
0      176    
144    96     
48     176    
128    128    
176    224    
-64    112    
48     240    
-336   -160   
224    16     
-112   -32    
96     48     
16     0      
-80    80     
16     32     
144    -1376  
0      160    
64     -16    
16     -208   
-224   0      
528    -816   
112    -400   
0      -1408  
176    -320   
176    144    
160    176    
176    480    
32     -240   
-48    -944   
128    80     
192    -32    
-288   16     
-144   -176   
48     -656   
-80    -112   
-64    -720   
128    -48    
112    112    
144    32     
48     -2368  
16     -256   
-80    16     
64     64     
128    -48    
-64    -48    
192    32     
-320   -128   
-384   -96    
512    64     
-1728  192    
-32    144    
-48    0      
272    48     
-96    -272   
-64    -816   
128    64     
-80    -32    
-80    16     
304    96     
64     0      
-80    -160   
64     -128   
176    112    
-144   -16    
-176   48     
-64    -48    
128    -48    
-32    -336   
16     32     
64     -96    
112    48     
32     -992   
-48    112    
0      -48    
112    16     
16     -16    
112    32     
-16    32     
-16    -80    
-576   -128   
112    -64    
-1808  -64    
0      -96    
192    96     
-96    96     
176    352    
224    -352   
-160   -16    
112    -160   
0      48     
160    0      
-48    64     
-112   32     
32     -208   
-256   0      
192    112    
-176   112    
-160   16     
-96    -208   
-48    -224   
240    80     
-320   -480   
192    48     
0      -368   
96     -32    
-80    -48    
0      -48    
48     48     
-16    -160   
16     -176   
176    -96    
-112   112    
96     0      
-352   80     
0      -128   
-48    0      
32     -128   
192    384    
80     -320   
-144   16     
80     -16    
-48    -16    
16     48     
-112   -208   
48     48     
16     64     
-416   0      
112    -240   
16     128    
-64    -32    
-96    224    
112    -96    
96     -48    
0      -752   
128    -256   
-368   -224   
112    -240   
0      32     
16     80     
0      80     
-80    96     
-176   -96    
112    160    
-640   192    
320    288    
-96    320    
32     -160   
128    416    
-176   144    
-16    48     
32     144    
48     48     
-64    80     
48     -128   
-80    80     
-112   -192   
-224   -176   
128    -272   
-176   0      
-672   320    
-80    432    
-240   -288   
16     32     
16     -80    
-48    160    
-128   272    
-272   -144   
-64    -240   
-48    64     
32     656    
64     -144   
-192   -64    
-384   48     
-256   192    
-912   -80    
-48    -48    
-48    -400   
-64    288    
-32    -160   
32     240    
-96    64     
-48    192    
-64    16     
-16    -48    
-192   -48    
176    -160   
-80    -192   
-112   0      
208    128    
-256   -144   
-48    0      
-32    80     
128    192    
32     320    
-112   128    
-96    224    
-48    64     
16     -240   
-224   -336   
16     144    
-400   160    
-16    -160   
-624   96     
16     -64    
-144   -144   
288    480    
-368   -112   
0      -144   
176    48     
-144   48     
80     -128   
0      -48    
256    272    
-432   224    
-160   64     
-672   -144   
-48    80     
256    112    
-240   224    
-240   -400   
144    192    
-128   32     
96     256    
80     304    
-128   16     
80     176    
-336   -528   
112    -48    
128    288    
-160   64     
-240   -64    
112    112    
96     112    
-32    -112   
-64    -64    
64     32     
0      112    
-64    -112   
-32    816    
128    -256   
-208   128    
-32    64     
-80    -208   
0      16     
128    -272   
-80    272    
-256   80     
-48    -448   
80     336    
-128   -64    
496    208    
-112   432    
320    -16    
-64    624    
0      -192   
-144   -128   
432    -416   
64     304    
48     576    
-80    -480   
-112   128    
240    320    
-656   -80    
160    448    
80     -16    
272    624    
-160   -192   
528    1216   
-592   -144   
304    -496   
192    512    
-160   208    
-256   -592   
64     -304   
96     144    
-528   -240   
752    208    
-464   64     
384    128    
-48    96     
0      144    
112    -80    
-224   176    
-96    -64    
128    -16    
48     -48    
-192   -128   
112    208    
-112   528    
-16    -48    
-32    448    
48     368    
-336   -192   
16     -64    
224    32     
-320   -224   
224    336    
-224   -48    
112    -32    
-80    -32    
16     112    
-144   -16    
-48    -16    
160    704    
-128   416    
-144   -528   
256    304    
-288   96     
32     80     
64     160    
-64    192    
144    416    
-176   80     
80     32     
-64    64     
0      16     
32     64     
64     96     
80     64     
-96    144    
0      -16    
-64    -48    
-112   -48    
176    208    
240    48     
-128   112    
208    96     
-176   0      
64     -144   
-112   0      
144    96     
-48    16     
-80    16     
64     -96    
16     96     
-80    112    
-176   -112   
-16    160    
192    128    
-80    80     
80     112    
-48    96     
-32    112    
48     64     
16     64     
176    304    
-208   48     
0      96     
16     -96    
80     -32    
64     -112   
-32    128    
256    192    
-48    -16    
0      64     
48     48     
192    96     
-192   64     
128    48     
-48    48     
176    96     
-160   0      
112    96     
-208   -32    
256    112    
-144   -64    
144    -592   
16     256    
32     192    
48     144    
144    32     
64     0      
64     0      
96     -64    
128    -48    
128    112    
192    0      
112    48     
-32    80     
-32    -80    
160    16     
80     -944   
-32    16     
32     64     
176    48     
-240   -128   
-32    240    
112    16     
-64    32     
-16    32     
64     112    
-64    128    
-48    48     
-224   -368   
128    32     
-128   48     
-48    -640   
128    160    
-192   -32    
-96    32     
-64    48     
-224   -336   
48     -64    
320    480    
-176   -144   
272    48     
-64    -80    
256    -128   
32     -112   
192    272    
-16    96     
-64    -112   
144    -16    
0      64     
160    80     
-48    48     
400    288    
352    480    
-32    320    
160    320    
96     96     
96     16     
160    64     
112    -64    
272    144    
64     80     
-144   -448   
240    -336   
192    -784   
192    16     
304    32     
160    208    
176    -592   
-176   -400   
256    16     
-112   -352   
-288   -272   
416    -32    
-288   16     
32     -80    
-80    16     
32     -160   
-160   0      
336    -48    
48     160    
64     -1376  
-288   48     
288    -16    
16     112    
80     112    
112    160    
-176   -16    
112    96     
48     96     
192    16     
-16    -64    
-384   -240   
192    16     
112    -96    
-80    48     
-80    -16    
64     272    
48     -192   
-128   -32    
-48    -224   
400    -48    
-80    80     
176    -16    
0      48     
128    96     
96     96     
80     -144   
80     128    
32     -560   
16     192    
96     -48    
96     16     
0      0      
160    192    
-128   0      
96     64     
16     144    
32     0      
-48    -32    
80     -272   
112    80     
112    -112   
-16    144    
-16    -112   
64     80     
64     0      
224    192    
-48    -112   
16     96     
112    240    
112    -288   
-48    256    
-48    64     
48     -608   
48     0      
0      48     
48     -304   
48     48     
112    64     
64     192    
80     -144   
96     -144   
-32    272    
320    160    
-160   144    
112    -160   
-16    -176   
192    -224   
32     -816   
320    -192   
-16    -400   
32     -64    
64     112    
48     16     
-112   144    
160    -432   
160    -448   
272    112    
-352   -528   
272    -176   
-576   -96    
224    464    
-16    0      
144    80     
-32    -128   
144    0      
0      -256   
80     -384   
0      -16    
112    -528   
32     -128   
144    288    
-16    -96    
224    176    
-240   -48    
-48    0      
32     -192   
-400   176    
-80    -672   
240    288    
-48    -112   
16     -64    
176    -256   
160    -32    
-144   -144   
96     -112   
48     384    
0      160    
-176   -800   
16     -1008  
32     -80    
48     464    
-32    144    
-32    -320   
128    48     
64     -112   
32     -144   
48     -592   
144    256    
0      -1520  
-64    32     
-48    -112   
128    0      
-32    -64    
176    48     
-128   -16    
-80    -144   
-256   -352   
304    -96    
-1824  32     
112    80     
80     32     
240    192    
16     48     
-288   -816   
0      -256   
160    -240   
240    464    
224    688    
-16    912    
304    0      
48     -304   
-192   -208   
-160   -432   
0      -64    
-128   -176   
-48    -16    
-96    -304   
32     32     
352    -304   
-16    416    
112    -1120  
-208   -96    
48     32     
48     144    
32     -48    
-160   464    
-256   -256   
-224   -384   
96     208    
144    544    
-224   -64    
240    -128   
-144   96     
160    160    
0      128    
144    -592   
240    -288   
-128   -192   
208    304    
-304   224    
-144   0      
160    16     
-48    624    
64     -384   
-16    -288   
64     80     
160    -32    
-80    512    
368    208    
-144   64     
112    -288   
0      16     
48     -48    
464    448    
-304   112    
272    -224   
-160   48     
-48    -1088  
-48    112    
128    144    
-144   128    
16     -128   
208    -32    
-864   80     
-32    -464   
80     80     
-336   -320   
112    48     
-16    192    
32     -16    
-144   -208   
16     -224   
-16    -32    
192    224    
-224   -16    
-128   -368   
-368   432    
-80    112    
-80    -448   
-224   -32    
48     32     
-144   160    
48     160    
-240   368    
-96    -224   
-256   -32    
-160   80     
32     352    
160    224    
-384   80     
320    304    
-560   -64    
-16    240    
32     16     
-256   -192   
240    -32    
-288   -192   
48     -208   
-464   -176   
128    -144   
-736   -304   
-64    -208   
128    -160   
-48    272    
160    192    
32     144    
0      48     
-48    192    
80     -512   
-352   -448   
96     -16    
-112   112    
16     112    
64     160    
-160   16     
-160   128    
-48    144    
-1584  192    
160    144    
-400   -32    
96     144    
-80    -80    
64     144    
48     192    
-208   -288   
-112   -112   
-32    368    
208    240    
-272   64     
112    -16    
-160   -32    
-16    0      
-16    48     
-64    -32    
-16    -208   
-16    0      
96     112    
96     64     
-112   16     
-16    80     
-96    48     
32     -176   
-64    48     
0      32     
-128   96     
-288   -32    
112    -16    
16     -16    
-128   112    
-144   0      
48     48     
-112   -64    
0      16     
-160   -272   
32     -80    
0      160    
-144   -240   
-80    32     
0      16     
-176   64     
112    160    
-64    96     
-128   16     
32     16     
-272   -80    
112    96     
-16    96     
16     96     
128    96     
32     0      
-32    -96    
-48    16     
16     80     
-80    -16    
16     64     
80     80     
208    192    
-400   -32    
240    128    
-272   16     
160    80     
64     16     
48     32     
-16    -32    
-144   -16    
96     128    
-128   96     
96     208    
176    112    
-48    160    
-80    -32    
-112   192    
-64    256    
256    496    
-272   -256   
64     -416   
80     0      
-32    272    
64     160    
-128   0      
128    176    
-64    48     
-16    16     
-32    0      
240    144    
-416   -48    
208    32     
96     -112   
16     96     
-48    -32    
-64    144    
32     160    
-32    32     
128    64     
-32    48     
176    144    
80     32     
-128   128    
-16    16     
-144   -144   
0      -144   
32     -192   
-96    -320   
0      -32    
64     0      
224    448    
-576   64     
272    0      
-176   208    
-64    16     
-112   16     
-16    80     
80     48     
-80    64     
48     0      
-160   144    
576    464    
-240   16     
192    -64    
64     144    
80     48     
-80    176    
-64    112    
32     48     
0      48     
0      80     
-80    -128   
-48    96     
112    80     
-80    32     
-64    16     
112    0      
-304   64     
64     176    
-144   -48    
480    336    
-80    -48    
64     0      
176    112    
32     -16    
-80    -80    
144    160    
-128   -64    
192    48     
-64    -16    
-224   -128   
0      160    
-128   128    
0      192    
-112   80     
80     96     
64     144    
16     64     
-128   80     
192    64     
48     208    
48     96     
16     48     
-128   32     
16     96     
-96    16     
256    256    
16     16     
-48    -2128  
0      80     
80     16     
0      32     
160    112    
-96    96     
176    192    
-80    128    
32     144    
112    64     
32     -16    
80     32     
96     32     
16     -16    
-32    96     
80     -1264  
16     128    
-176   208    
176    304    
-112   16     
-96    80     
32     80     
80     -32    
48     48     
0      192    
128    256    
-80    32     
32     160    
-640   -80    
-240   -96    
160    -848   
-144   -32    
256    -320   
80     368    
96     384    
-32    -240   
16     272    
32     -32    
-128   -416   
128    608    
208    304    
-48    128    
-272   -320   
256    -112   
-160   512    
240    -336   
-144   80     
336    176    
-64    80     
208    96     
-32    64     
-112   0      
224    112    
-112   -32    
112    80     
-80    -16    
80     112    
80     384    
16     -144   
-64    -48    
-64    48     
-96    -400   
64     -208   
144    128    
32     -1840  
32     64     
496    272    
-256   560    
176    0      
0      224    
0      48     
160    256    
32     176    
-16    -192   
96     128    
-80    -160   
16     48     
224    -160   
-160   160    
64     -640   
16     -32    
80     144    
96     192    
192    112    
160    240    
-48    48     
64     -160   
16     16     
-48    -176   
48     16     
-80    -1040  
-128   -864   
0      -336   
-32    -240   
-16    -1232  
-32    -144   
112    176    
80     160    
48     176    
32     112    
128    16     
0      -48    
48     112    
96     -320   
-96    128    
224    -96    
192    128    
-176   -224   
0      0      
112    -208   
496    688    
-128   656    
32     160    
16     336    
288    416    
-176   192    
48     -176   
-16    80     
80     -288   
848    976    
-400   880    
-144   48     
80     -464   
32     -32    
-208   -624   
-160   -80    
-16    -560   
-160   -992   
112    160    
-176   96     
80     -1040  
-96    128    
-176   -1280  
176    -272   
-160   -416   
-128   -224   
272    352    
-208   496    
-288   480    
336    -560   
-352   -1744  
224    512    
-96    176    
-224   -240   
-256   16     
-32    -16    
192    -96    
256    48     
-64    -192   
-48    -1200  
-96    -1088  
432    -256   
-48    640    
64     112    
96     -32    
96     -112   
96     -480   
512    32     
32     432    
32     448    
32     -112   
-352   -384   
80     -1712  
-32    -48    
336    112    
-224   -16    
48     -1168  
144    -288   
-80    144    
208    144    
144    176    
-272   48     
128    80     
-16    -96    
-336   -480   
96     -592   
-336   -240   
176    -112   
112    -112   
256    208    
160    96     
-288   -48    
224    -160   
32     0      
144    96     
0      160    
128    208    
48     144    
-32    -16    
-288   -112   
64     0      
16     -176   
-208   -352   
304    -48    
-192   16     
-48    -144   
112    -112   
80     128    
32     -80    
16     16     
-32    -336   
64     -96    
16     0      
48     48     
-16    80     
48     64     
80     224    
-16    -224   
-432   -160   
-80    -496   
240    -112   
80     80     
-160   32     
48     0      
192    192    
-128   80     
16     64     
48     -48    
16     -208   
144    64     
64     -64    
-192   -112   
112    -16    
-304   64     
-112   -16    
-256   16     
80     -128   
80     48     
128    -432   
16     64     
64     -1120  
176    32     
-208   48     
144    -16    
-240   -80    
80     -64    
-176   -160   
-16    -112   
16     176    
64     -96    
96     -352   
32     -64    
224    144    
-128   -240   
80     16     
32     -608   
64     0      
-16    48     
112    -64    
-48    96     
32     0      
-48    16     
80     48     
-48    112    
80     -208   
-176   -64    
128    -224   
96     112    
0      80     
-80    -16    
32     -96    
-48    16     
-144   -64    
-32    -128   
0      32     
256    144    
-352   128    
-32    -16    
-96    32     
64     -96    
-32    32     
144    -64    
-80    112    
-416   -176   
48     112    
-32    112    
-320   16     
-16    16     
-448   80     
-96    48     
288    176    
-240   112    
80     48     
96     96     
16     16     
16     48     
80     -112   
64     64     
-464   -272   
48     -240   
-48    128    
16     64     
-16    -16    
-288   16     
-144   96     
-304   -32    
-48    -144   
0      16     
-160   64     
288    0      
16     -48    
-80    -144   
128    112    
32     -48    
-48    160    
48     176    
-112   -80    
-208   -176   
-176   -48    
-48    -176   
-352   -16    
32     48     
-96    -48    
-80    32     
-16    -240   
96     96     
-80    -144   
-48    128    
80     -32    
-160   32     
208    -96    
-192   48     
64     64     
-16    128    
128    64     
-112   32     
16     80     
-896   -96    
144    80     
-32    -64    
-16    160    
-32    0      
0      112    
0      48     
-80    112    
-208   32     
-80    16     
112    96     
-304   -304   
256    16     
-288   224    
-16    -80    
-592   -128   
160    128    
16     -16    
48     144    
32     -32    
-80    16     
-208   -240   
192    -224   
48     -96    
-208   48     
-48    64     
144    80     
-224   -16    
-160   -16    
-16    96     
-192   -48    
-32    96     
-464   0      
-32    0      
16     -64    
-112   64     
-16    32     
48     32     
-176   48     
208    -32    
-32    192    
96     208    
-64    -48    
-128   64     
256    160    
-96    -16    
-48    -144   
80     -64    
-224   -128   
224    128    
-32    -64    
-144   -176   
176    -48    
-32    96     
-176   -448   
-176   -256   
288    112    
-64    240    
112    432    
-256   240    
-224   -32    
112    32     
-416   -96    
80     96     
-32    208    
-112   96     
-80    32     
64     144    
32     48     
-240   -80    
176    48     
48     32     
-112   80     
-128   16     
64     64     
-352   -208   
48     -64    
-224   -32    
272    16     
144    128    
64     304    
112    96     
0      32     
-240   -160   
160    -96    
-144   -192   
128    400    
-224   176    
-176   -304   
192    80     
-208   -80    
96     96     
-80    -192   
0      224    
64     48     
-96    112    
96     16     
16     32     
-80    0      
32     -160   
-96    336    
80     48     
-208   -64    
32     0      
112    144    
-144   16     
0      144    
176    -192   
-80    144    
64     144    
-128   -64    
336    176    
-208   240    
16     48     
-144   96     
112    48     
-16    64     
-16    80     
-64    0      
0      80     
-64    16     
80     112    
32     80     
32     48     
48     96     
48     80     
-112   -192   
112    -96    
16     160    
-64    -16    
16     16     
176    112    
0      112    
-16    32     
-48    96     
-32    -16    
-80    0      
0      96     
0      96     
-64    80     
64     112    
-112   96     
176    304    
16     112    
16     160    
64     64     
-48    64     
-48    96     
-112   -96    
-32    176    
48     -256   
0      -224   
320    128    
-192   96     
128    80     
16     0      
-64    80     
112    64     
-64    160    
672    752    
-464   864    
-48    176    
176    288    
208    352    
0      208    
64     -48    
64     -2224  
96     -80    
0      128    
128    32     
-64    112    
64     96     
32     96     
-16    16     
144    80     
0      112    
80     80     
16     128    
-128   -16    
240    -160   
-96    -496   
-16    -576   
160    16     
0      128    
256    272    
-64    0      
48     32     
-48    80     
-80    -560   
576    304    
0      1392   
16     -480   
272    -320   
80     432    
16     -224   
112    96     
-32    -128   
-176   64     
352    96     
-224   -256   
32     -128   
0      192    
224    128    
-80    -288   
368    176    
-96    352    
-32    -272   
288    64     
-16    160    
160    96     
16     336    
64     192    
16     96     
48     -608   
32     128    
96     64     
16     -64    
32     144    
-32    -96    
432    672    
-176   336    
128    -112   
16     -64    
80     96     
48     -240   
-240   -144   
64     -208   
-32    -16    
-176   -624   
160    32     
-96    -464   
512    -112   
-176   96     
208    32     
-144   -48    
160    112    
-224   64     
688    320    
-416   256    
304    240    
-496   -96    
112    -96    
208    160    
-80    -336   
-368   -128   
416    -176   
-112   176    
0      -1632  
-256   -48    
592    -48    
-144   208    
272    32     
64     48     
160    112    
-48    -128   
128    80     
-16    -208   
-48    -112   
144    -192   
48     0      
32     -240   
352    176    
-272   32     
96     96     
-32    -64    
320    -48    
-32    112    
160    -592   
-32    32     
272    -240   
-400   64     
240    16     
-32    96     
64     -48    
16     112    
-96    -304   
112    96     
-64    112    
-96    -128   
224    -64    
-32    32     
176    144    
128    -96    
176    224    
-128   32     
16     48     
48     -288   
112    128    
96     -288   
-32    64     
192    -208   
80     224    
-32    16     
96     -640   
64     0      
80     -576   
64     -208   
176    -32    
16     -144   
144    -16    
96     -816   
16     16     
-48    48     
48     32     
128    112    
96     160    
160    -208   
-192   -144   
144    -272   
16     32     
-80    32     
128    -208   
-144   -128   
160    -112   
64     128    
224    -336   
-272   -16    
128    128    
144    80     
-32    112    
64     -32    
160    -112   
112    64     
-256   -240   
368    -240   
-256   -80    
144    -144   
-816   -208   
240    -256   
16     64     
48     -320   
128    -32    
-16    -528   
112    -80    
-128   -416   
48     -144   
128    -48    
144    16     
-144   48     
208    16     
-112   32     
48     -48    
-512   -208   
64     -176   
192    64     
-112   96     
-32    16     
144    -672   
208    -192   
112    -624   
48     32     
112    16     
160    80     
-192   16     
80     -96    
-64    -128   
32     -112   
-144   112    
-128   144    
-768   -128   
96     -176   
64     -16    
112    -480   
64     32     
64     -608   
80     80     
16     64     
-80    48     
208    0      
-64    80     
-128   -32    
32     0      
-224   -32    
-224   -176   
-160   -112   
-32    -208   
208    -128   
-64    96     
240    64     
64     -368   
48     96     
32     -80    
16     112    
-128   48     
128    64     
-80    80     
-144   -208   
-32    -144   
112    -48    
-384   32     
208    80     
-432   96     
-48    -48    
-48    -112   
16     -368   
-16    -16    
16     -656   
16     -16    
48     80     
64     80     
-624   16     
80     -64    
-64    0      
48     -192   
-240   -160   
192    16     
-208   80     
-80    -160   
128    -16    
-80    -160   
224    128    
-64    -320   
192    -32    
-512   80     
112    -192   
-192   64     
-96    -64    
-32    -32    
-112   -128   
-256   64     
-112   -320   
-224   -176   
224    -192   
-96    -48    
480    16     
-448   160    
224    96     
-912   80     
16     -16    
-80    -112   
96     32     
64     80     
48     192    
112    96     
-272   -256   
96     -304   
-96    32     
-672   0      
-240   16     
-192   -128   
0      -128   
-16    16     
-208   -64    
-144   96     
-416   144    
-160   256    
16     -16    
-384   -48    
416    -144   
64     -48    
-416   -224   
-80    64     
16     -16    
-464   -32    
128    -32    
-160   432    
-176   512    
-112   -64    
-64    -80    
-352   -160   
-128   -16    
16     64     
0      16     
224    176    
-112   64     
16     -32    
32     224    
-144   -336   
0      240    
64     96     
-96    -48    
-16    176    
-112   -224   
144    -80    
32     48     
-160   48     
-80    96     
-16    80     
48     64     
32     32     
-96    -80    
-16    16     
-288   -400   
208    192    
-160   -224   
64     -400   
272    400    
-64    768    
-96    176    
-160   -464   
-16    -240   
-16    -80    
-128   -32    
64     -48    
-160   96     
240    80     
-288   224    
96     -48    
-80    -192   
48     64     
0      -16    
-96    32     
-224   -64    
-176   -112   
48     -48    
160    448    
-32    448    
-224   96     
-368   -192   
-176   192    
-128   -112   
96     112    
32     -16    
-32    0      
-32    64     
-144   0      
80     96     
0      64     
-16    48     
-16    64     
0      48     
-80    32     
-416   -128   
320    -368   
-144   16     
-128   32     
0      368    
32     240    
0      -80    
-64    -48    
96     -176   
-32    176    
80     336    
32     112    
-224   -96    
112    128    
-176   -32    
-16    80     
-176   -64    
0      96     
-368   -48    
32     64     
-80    -96    
-64    48     
-32    0      
-128   -224   
16     -400   
192    192    
80     496    
0      128    
128    224    
-128   144    
16     -272   
-272   -400   
144    -272   
-752   -848   
416    144    
-80    320    
288    432    
-64    352    
64     32     
16     32     
80     176    
48     96     
-96    112    
160    16     
-32    128    
80     976    
-240   -240   
-16    -176   
-240   -32    
80     192    
-48    112    
592    848    
-560   -432   
48     -608   
80     624    
-16    160    
96     -160   
-32    144    
-144   128    
-96    96     
16     -224   
64     160    
416    576    
-256   160    
0      -240   
128    -288   
-80    256    
64     144    
192    304    
-272   -96    
0      -192   
-112   -16    
64     160    
-160   32     
-112   -96    
96     144    
-272   144    
224    64     
-144   -112   
-32    -80    
208    112    
144    224    
48     64     
160    160    
-96    -112   
0      -16    
112    112    
-32    96     
-208   64     
144    96     
80     112    
-96    64     
-336   32     
-112   -688   
-464   -688   
368    16     
-352   128    
-48    32     
-208   -192   
208    240    
-192   64     
-112   112    
32     -48    
-16    208    
48     112    
-192   64     
144    48     
-96    32     
48     96     
-128   -48    
192    80     
-16    80     
0      -64    
144    272    
-288   288    
-112   240    
32     64     
0      32     
240    224    
-288   -32    
288    -304   
-384   256    
240    -1344  
-288   96     
240    240    
-128   240    
-64    272    
48     192    
64     208    
112    32     
64     48     
-160   64     
-48    64     
0      160    
0      32     
-144   80     
208    64     
-96    -704   
144    96     
-64    -32    
32     0      
256    48     
96     64     
80     48     
-144   80     
144    96     
-112   16     
16     0      
160    96     
-64    128    
224    96     
208    192    
-288   -336   
240    112    
64     48     
48     96     
0      80     
96     96     
64     48     
-160   112    
32     -240   
64     -32    
-16    96     
80     112    
48     48     
-176   -320   
16     96     
0      -464   
0      -64    
96     48     
176    96     
48     112    
368    320    
-416   224    
288    48     
-256   32     
208    96     
-64    32     
0      48     
176    112    
-32    48     
80     64     
-128   -192   
192    336    
-48    -944   
16     16     
-192   -176   
80     32     
-48    -144   
80     112    
64     128    
64     112    
272    144    
-416   320    
192    64     
-128   -80    
112    80     
144    -64    
-144   16     
128    -608   
144    96     
48     -976   
-16    64     
384    256    
-368   208    
32     0      
176    224    
-48    192    
-144   -96    
16     48     
192    16     
32     48     
-48    -288   
144    192    
112    -192   
48     112    
128    -32    
-16    96     
176    176    
0      272    
-112   80     
176    160    
16     -16    
144    224    
96     16     
48     -320   
48     64     
112    -384   
80     16     
64     0      
80     96     
80     -48    
-176   0      
144    -48    
64     64     
128    128    
-48    144    
112    176    
80     -160   
80     160    
48     -288   
0      64     
272    -48    
80     160    
-32    -176   
48     80     
-16    -304   
-176   -96    
208    -80    
128    176    
48     32     
-32    -2368  
160    -560   
64     -96    
-16    -288   
-64    -80    
240    128    
-64    -48    
304    432    
-336   272    
-224   112    
304    -176   
80     -272   
224    368    
-96    -544   
128    -176   
-880   -272   
160    -336   
-80    -64    
80     80     
-64    -160   
400    -400   
-160   -112   
0      -48    
80     -32    
240    -48    
32     112    
-128   -128   
208    -112   
-32    -48    
16     176    
-864   -144   
-224   -560   
-96    -368   
208    32     
-48    -272   
96     -800   
0      -192   
128    -624   
80     64     
16     144    
352    -48    
96     464    
416    368    
-48    -144   
240    -96    
0      -416   
-80    -368   
-976   -128   
-256   16     
336    -16    
64     -16    
208    -64    
32     -256   
128    128    
64     -112   
-160   160    
80     -224   
-48    240    
160    -112   
-80    -112   
-16    32     
-32    128    
-336   160    
176    -192   
208    -80    
128    64     
48     -80    
48     -672   
128    64     
-176   -1712  
144    16     
-128   336    
144    96     
-160   -128   
-16    -112   
-192   -48    
-160   224    
16     -304   
-160   -464   
-848   288    
-80    0      
368    -16    
0      -864   
144    -128   
208    -480   
96     272    
-112   -592   
176    80     
224    544    
-128   464    
-96    -112   
16     -272   
-224   -144   
80     -384   
-1232  128    
256    -80    
-992   -16    
144    16     
176    128    
-48    -80    
-80    128    
192    -320   
0      -16    
32     -80    
128    -32    
-96    96     
128    -224   
-320   -16    
288    -480   
-336   -304   
368    288    
-144   144    
48     160    
48     -592   
256    -288   
-192   112    
272    -1728  
16     80     
-368   -112   
320    16     
-352   96     
192    16     
-208   -96    
96     0      
0      80     
-48    -32    
-64    -80    
176    -320   
144    416    
-64    64     
352    432    
-192   384    
16     48     
-400   -192   
320    -32    
-192   0      
128    0      
-112   48     
96     48     
-16    80     
48     -80    
-272   48     
128    -112   
48     96     
96     -32    
-208   -32    
16     -288   
-304   -288   
-240   -656   
-128   -784   
96     -224   
-32    -48    
144    48     
80     352    
16     176    
-16    -272   
128    288    
-336   -16    
32     32     
0      -144   
80     432    
-432   416    
-176   -544   
-16    -368   
-448   576    
0      -336   
240    -160   
240    -48    
-288   -480   
-144   112    
144    -96    
-16    160    
48     -192   
288    432    
-192   752    
-64    -96    
16     320    
-128   -224   
128    -288   
272    592    
-160   144    
-112   -256   
64     48     
48     176    
-112   32     
16     -80    
64     240    
-48    48     
80     240    
-144   -240   
-96    336    
208    688    
0      320    
-64    224    
-288   -176   
-144   -208   
-352   -96    
48     -272   
-800   -176   
-128   -128   
112    -48    
-32    96     
-144   -160   
272    368    
-208   48     
48     32     
-304   -128   
-160   -320   
288    -224   
-208   -48    
96     304    
-160   160    
-144   176    
-496   32     
0      144    
32     -176   
96     32     
-112   -176   
352    144    
-240   144    
208    -16    
0      96     
-208   48     
112    112    
48     128    
-144   96     
-16    64     
-272   -80    
-80    -96    
32     384    
-48    -192   
32     112    
144    48     
-128   -80    
16     96     
-112   -64    
96     112    
-160   16     
160    144    
304    784    
112    400    
-304   480    
-32    368    
-32    464    
-16    320    
-384   -64    
0      -160   
-208   -224   
-64    -128   
32     -16    
-112   -160   
48     144    
-144   112    
64     304    
-112   160    
16     48     
-144   112    
32     160    
-16    -208   
-64    96     
-48    -208   
-96    -16    
240    0      
-16    -16    
208    176    
0      112    
-176   208    
48     128    
-176   192    
-80    176    
-160   16     
-16    80     
-128   16     
-128   -48    
0      -304   
-256   -400   
-64    -112   
-96    224    
0      224    
-16    48     
-208   48     
48     0      
-64    -80    
80     112    
-112   0      
32     16     
-32    -96    
-96    -96    
176    32     
-16    80     
-96    0      
-16    64     
64     0      
-16    0      
-16    128    
-80    48     
-32    64     
-112   112    
0      0      
-112   -48    
0      96     
0      16     
-32    160    
-32    112    
128    16     
-160   -144   
80     -16    
16     32     
128    64     
64     128    
160    128    
-16    48     
-16    112    
96     80     
-16    112    
144    80     
-240   -16    
-32    -96    
128    96     
64     0      
32     96     
-96    32     
64     48     
32     64     
176    0      
16     80     
176    112    
-224   16     
304    336    
-272   48     
112    144    
-160   0      
112    96     
48     80     
-272   96     
192    144    
-96    80     
-176   -368   
192    -128   
96     160    
-96    0      
-96    64     
240    16     
-64    368    
-144   16     
-16    80     
0      -32    
176    176    
-112   -64    
0      96     
144    96     
32     80     
0      128    
16     0      
-176   0      
64     80     
80     112    
-112   -32    
80     64     
32     96     
80     112    
-32    0      
64     48     
48     32     
-32    -64    
32     16     
128    128    
96     128    
-64    128    
16     64     
64     16     
80     80     
128    16     
112    96     
-192   48     
0      208    
64     0      
-32    -64    
256    224    
-128   -928   
-320   160    
272    224    
16     384    
-80    208    
-64    64     
176    64     
64     -112   
-176   -240   
96     -80    
-48    -48    
0      112    
96     160    
-96    -272   
96     -32    
48     -320   
96     192    
-16    16     
48     160    
80     448    
-32    384    
32     80     
16     -16    
-64    -368   
112    96     
-96    304    
0      -64    
-128   -160   
64     112    
-80    -496   
112    96     
-80    144    
0      -816   
96     -256   
160    384    
-80    176    
-112   -688   
0      64     
112    496    
-32    32     
32     -112   
-16    96     
64     32     
-32    -336   
-240   336    
240    64     
-128   -80    
64     -288   
0      384    
16     -96    
-16    -80    
128    112    
0      -112   
-32    0      
128    192    
-32    160    
480    80     
-208   256    
-16    32     
0      -112   
16     -144   
-208   16     
16     -992   
-96    208    
96     -528   
48     96     
-16    -480   
112    320    
128    608    
-16    -96    
128    80     
-112   176    
288    192    
192    320    
-128   80     
288    -240   
-64    16     
656    416    
-736   -624   
288    144    
96     144    
80     -64    
-16    -64    
-144   -304   
64     304    
-544   -416   
608    -608   
16     944    
128    -128   
192    -448   
192    224    
-112   -128   
128    -144   
16     -208   
96     80     
-64    -176   
32     336    
128    -112   
32     0      
400    560    
-288   -576   
32     -416   
96     160    
32     -192   
176    496    
-80    -496   
624    192    
-336   720    
224    -384   
384    -368   
64     704    
-32    -48    
128    -800   
64     192    
-560   -80    
48     -784   
64     -48    
112    -288   
16     -48    
64     224    
80     -16    
16     -64    
64     128    
256    512    
-192   -16    
32     0      
144    208    
-48    128    
16     -128   
-768   -32    
160    0      
-48    -384   
64     -608   
176    160    
112    -1264  
144    -368   
128    592    
16     192    
0      -144   
80     336    
80     -368   
176    160    
-368   -560   
320    -576   
-240   496    
464    656    
-416   -112   
-112   64     
96     -480   
-48    -160   
-96    -528   
96     -160   
176    256    
-80    -64    
-16    96     
192    -272   
-64    32     
80     -64    
96     0      
32     64     
16     -64    
-48    -16    
80     64     
208    -112   
64     -448   
144    -352   
-48    -672   
240    336    
-96    -448   
320    64     
-16    32     
96     352    
96     240    
-96    -160   
-96    -48    
-32    -48    
-1024  -64    
320    400    
-208   -144   
64     -176   
96     -240   
-48    -320   
80     -144   
96     -352   
208    320    
0      128    
-16    208    
48     128    
16     160    
-112   -16    
160    16     
-160   112    
48     144    
-336   208    
-48    368    
64     176    
0      -416   
16     32     
368    80     
80     48     
32     -176   
160    -96    
48     0      
192    -192   
-320   32     
112    0      
48     16     
160    -16    
-112   0      
112    -48    
-624   64     
112    -16    
224    96     
176    -448   
-16    64     
-32    -912   
80     -608   
0      -240   
192    -128   
-320   48     
144    0      
-272   -48    
-16    -224   
80     -16    
-176   -96    
192    272    
-320   -144   
64     -64    
-48    -400   
144    64     
64     16     
128    80     
-16    128    
224    320    
-400   -208   
112    64     
-272   -16    
128    176    
-64    176    
-176   32     
-16    192    
112    -32    
-224   96     
112    80     
0      144    
32     -32    
160    176    
-32    80     
-64    -48    
-304   -48    
32     -96    
-16    32     
48     -16    
-96    16     
176    -112   
-224   48     
-672   16     
-160   -512   
-480   -320   
-240   0      
-464   -128   
-240   -304   
-48    352    
-784   176    
-128   96     
-16    80     
-320   96     
96     -80    
144    -48    
-992   -224   
-32    32     
-432   -48    
64     80     
-144   112    
192    48     
-80    96     
-112   -272   
-112   -80    
-224   -96    
176    160    
-608   80     
-144   32     
128    -112   
-176   32     
-80    16     
176    80     
-48    -176   
-144   208    
-48    -128   
112    0      
-48    96     
0      16     
-176   176    
32     240    
-272   96     
-928   16     
-48    400    
208    0      
-96    96     
96     -80    
-80    -16    
176    -80    
0      96     
-16    -48    
-112   0      
112    128    
-112   -64    
16     0      
-192   0      
-112   -128   
-240   -96    
-240   -48    
-1008  -32    
0      112    
-192   -304   
-64    128    
48     -288   
-64    48     
48     0      
0      96     
-64    -128   
-128   -144   
16     -16    
0      64     
64     192    
-192   128    
-80    0      
32     32     
0      80     
-16    -64    
-16    112    
128    32     
-96    -16    
96     96     
-32    16     
-80    32     
16     0      
-128   64     
112    160    
-80    80     
0      -16    
0      80     
-288   -64    
128    64     
-176   -128   
256    160    
-112   176    
-96    80     
-176   -80    
-64    -48    
16     48     
-80    32     
0      128    
80     0      
-64    64     
16     112    
-176   48     
-32    -48    
-64    64     
-656   80     
-224   192    
-128   176    
-64    80     
128    112    
128    16     
64     112    
-16    -96    
208    112    
-176   0      
-80    176    
176    384    
-112   -192   
-128   96     
0      256    
-544   -432   
-32    -80    
80     112    
-32    128    
112    144    
16     0      
96     -128   
0      368    
32     416    
-16    80     
-48    112    
-80    -320   
128    0      
16     160    
16     32     
0      -16    
-64    32     
96     608    
128    112    
-48    144    
-112   80     
192    144    
-288   80     
96     -160   
-240   -112   
288    -112   
-80    128    
144    48     
-288   -32    
-80    -144   
336    80     
-144   272    
112    0      
96     48     
-32    64     
32     64     
48     80     
-32    16     
240    176    
-64    -144   
512    560    
-512   -96    
208    -224   
64     -16    
16     224    
160    352    
-144   -272   
128    -48    
128    224    
-256   288    
64     -352   
240    112    
48     384    
96     112    
0      -96    
48     -80    
-176   0      
32     -144   
-176   -112   
576    352    
-112   528    
-16    -32    
48     -288   
224    464    
-112   128    
-80    -96    
-48    48     
192    -32    
16     192    
-64    192    
32     608    
-96    -304   
-208   -336   
-48    -240   
160    176    
32     192    
0      272    
32     240    
-208   160    
160    64     
-144   80     
128    0      
-384   32     
-160   -16    
-80    48     
112    272    
128    256    
-272   -144   
144    -256   
224    944    
-16    112    
-240   -624   
128    -336   
432    704    
-64    480    
-32    -320   
336    -416   
-16    272    
224    0      
528    800    
-704   -1056  
240    -48    
-144   -656   
-16    816    
16     -432   
16     -272   
-96    64     
-144   -272   
208    1312   
-208   -64    
-64    -464   
-48    304    
-80    16     
0      96     
-48    -80    
-112   16     
-16    544    
208    144    
-144   -80    
-224   -800   
112    256    
16     48     
-80    208    
0      -112   
192    560    
-144   -224   
128    272    
-176   -96    
128    192    
-16    64     
-48    -16    
192    64     
-32    32     
160    144    
-32    96     
416    224    
-240   -352   
16     -48    
208    16     
0      176    
128    -192   
48     -176   
224    -48    
-32    -64    
80     32     
80     352    
208    -48    
64     -464   
144    256    
-80    -352   
96     -48    
176    -128   
-16    -80    
0      -80    
64     304    
64     160    
0      224    
-64    -288   
48     -288   
-96    128    
144    320    
80     32     
-80    -176   
64     -192   
176    -192   
160    368    
112    -656   
80     0      
-48    -1824  
144    224    
96     304    
64     96     
48     64     
80     224    
224    64     
16     -80    
176    128    
208    -64    
-112   48     
320    0      
-16    112    
96     -704   
0      128    
208    -176   
-272   -16    
128    -112   
48     -112   
48     -128   
-16    -256   
48     112    
240    -112   
-144   128    
144    128    
-32    192    
16     -336   
-32    80     
-16    -48    
-32    0      
176    -432   
32     128    
0      0      
-32    160    
112    272    
-80    160    
64     96     
144    -224   
64     96     
32     0      
64     -16    
112    -144   
16     64     
176    48     
-32    32     
64     -224   
48     96     
64     208    
-80    112    
80     96     
144    -80    
-112   -944   
128    0      
-32    -1344  
80     -96    
144    48     
0      -16    
176    192    
-112   64     
240    96     
-112   -112   
144    -1344  
48     80     
80     -96    
192    96     
-1424  -80    
144    -496   
16     -32    
64     -1296  
32     -416   
64     -880   
-80    32     
-48    208    
336    -176   
-96    -192   
256    -16    
-64    48     
336    32     
32     192    
-48    -320   
-480   64     
256    -144   
32     96     
144    32     
176    48     
64     -208   
-144   -208   
208    -80    
16     -16    
192    -128   
-64    160    
96     96     
128    16     
-80    -304   
272    -352   
80     -64    
272    -192   
-128   64     
256    -64    
256    272    
-256   -32    
48     -80    
0      -720   
-16    -16    
80     16     
-224   -112   
-80    -224   
-96    -160   
176    48     
16     -80    
-400   -704   
208    -32    
-608   192    
-336   -224   
32     176    
-32    -128   
80     176    
144    128    
-64    16     
128    -928   
-144   0      
80     -128   
80     80     
-32    -80    
128    96     
-112   0      
-176   -368   
176    -192   
-32    -128   
-656   -96    
-64    112    
48     160    
-48    -176   
0      80     
-80    -1168  
224    0      
-240   -64    
560    0      
-256   -16    
496    -16    
-368   -80    
240    -32    
-32    16     
112    16     
112    48     
176    -112   
-224   144    
160    -224   
-240   96     
80     -400   
32     -64    
224    32     
128    48     
-192   -64    
96     -128   
-256   -240   
192    0      
-96    80     
-80    0      
-208   48     
-160   -80    
240    -16    
-64    -112   
128    176    
112    -80    
64     192    
80     48     
304    192    
-144   128    
128    16     
-80    0      
112    64     
-32    0      
-48    -16    
-256   -32    
32     80     
-16    64     
16     -208   
48     -80    
272    -80    
64     192    
-368   -16    
48     -16    
192    32     
96     48     
-64    128    
-32    240    
-16    144    
80     -160   
64     112    
-16    -224   
-112   96     
272    400    
144    128    
-896   -416   
64     0      
160    288    
-272   336    
32     64     
64     192    
-160   176    
48     -96    
0      176    
16     -16    
32     80     
64     -176   
-112   -16    
-272   -208   
0      112    
-80    -144   
-16    64     
16     48     
-304   48     
-128   16     
-880   224    
0      -112   
16     -96    
-48    368    
48     -320   
-176   -64    
-208   208    
-112   -112   
80     32     
-128   528    
112    -48    
-288   176    
128    160    
-400   -96    
192    240    
-752   -144   
-16    0      
-272   64     
80     80     
-144   -208   
80     -48    
-48    48     
80     128    
-112   -160   
96     -64    
128    48     
-144   208    
32     -80    
-96    -64    
96     144    
-160   96     
-112   -48    
-96    -80    
-48    288    
-1312  -256   
-128   -208   
96     -192   
144    32     
-32    -144   
16     80     
-96    16     
176    80     
-96    80     
192    144    
-208   32     
64     48     
-48    64     
-64    -16    
-48    48     
-288   64     
64     112    
16     -32    
112    208    
-144   -112   
-288   -208   
64     48     
32     -32    
-48    -64    
32     16     
-32    160    
112    128    
16     80     
288    384    
-176   112    
-384   -208   
496    16     
-944   -16    
160    -32    
-48    16     
64     80     
272    192    
-336   384    
464    272    
-352   272    
-240   -544   
0      -320   
-160   400    
368    208    
-288   64     
240    672    
-176   432    
-1328  -224   
160    -464   
192    832    
-16    -432   
-144   192    
-112   -160   
-224   -576   
224    352    
-16    528    
48     -176   
-144   32     
16     -112   
304    -48    
-320   -96    
112    336    
-368   -64    
-96    -112   
32     288    
-128   224    
-160   -368   
-48    240    
-32    336    
-32    352    
208    176    
-480   -544   
16     176    
-256   -32    
64     -96    
48     0      
192    208    
-592   16     
208    -64    
-208   -160   
112    240    
-224   -96    
-64    80     
-32    -48    
-16    160    
32     160    
-144   -128   
-16    -864   
-144   448    
192    -64    
-304   -560   
-320   -528   
0      112    
-32    352    
-64    80     
-112   -144   
32     304    
-16    464    
-64    176    
-48    -272   
-224   -384   
80     -48    
32     256    
-32    176    
128    144    
-96    112    
-16    160    
112    -48    
160    96     
64     -32    
-112   80     
192    -80    
-32    -80    
48     -160   
128    96     
64     -32    
96     -192   
16     -96    
96     -192   
16     144    
-48    -240   
-48    -64    
288    96     
-80    64     
0      16     
96     176    
0      112    
-160   -112   
80     80     
48     80     
-32    -144   
-192   -16    
-16    144    
-192   80     
-80    160    
16     160    
-96    32     
-48    96     
-32    -592   
-80    -240   
144    208    
-32    32     
0      64     
128    96     
80     80     
16     80     
-112   80     
144    96     
80     208    
240    288    
-288   240    
112    64     
-256   -16    
112    240    
32     256    
-80    48     
16     80     
-16    96     
16     -48    
224    -96    
-80    144    
-32    -48    
-32    144    
0      -464   
160    -208   
400    128    
-320   240    
16     0      
-176   -336   
240    144    
48     224    
-112   48     
32     64     
-16    128    
-48    -64    
80     32     
-80    32     
64     160    
-96    -96    
-16    -288   
96     112    
32     -240   
64     128    
-64    96     
96     160    
-48    128    
-16    112    
112    96     
112    160    
-144   96     
96     64     
64     48     
160    144    
-80    0      
112    32     
32     96     
-112   -128   
240    -48    
-240   -32    
336    -96    
0      64     
128    16     
176    32     
-96    -144   
256    -240   
192    80     
-256   0      
208    304    
224    192    
0      -112   
0      -96    
64     -464   
48     64     
96     -1328  
48     32     
48     32     
128    64     
32     240    
176    400    
96     224    
48     176    
-48    48     
128    112    
-16    16     
304    -48    
-288   176    
48     -880   
128    -112   
208    -368   
32     240    
-80    -128   
0      -32    
96     -96    
64     -16    
32     160    
-64    -128   
112    80     
-32    0      
208    -32    
-16    48     
224    160    
-256   -32    
160    80     
144    448    
-304   112    
176    144    
-128   -176   
336    80     
0      48     
96     -64    
48     224    
128    128    
-240   -144   
240    112    
-144   16     
48     64     
-16    -208   
32     48     
464    -160   
-32    96     
176    -640   
-16    144    
64     -128   
352    352    
-16    112    
-16    144    
80     112    
320    176    
16     16     
16     -432   
112    176    
112    -144   
-96    96     
192    -16    
64     256    
-208   -16    
160    208    
192    144    
-176   -16    
96     16     
192    112    
80     64     
96     -48    
80     64     
-80    -128   
176    48     
96     48     
128    0      
-288   64     
256    112    
64     32     
64     144    
-64    16     
-96    -208   
96     16     
16     -48    
96     -816   
16     16     
240    -1904  
112    0      
-240   32     
112    -144   
128    160    
-128   -128   
80     48     
-16    -256   
-16    -608   
-64    64     
192    -320   
-192   144    
-1456  -64    
144    -96    
0      -240   
144    -192   
144    272    
-160   96     
240    0      
-128   48     
96     -192   
16     -304   
16     -32    
64     -160   
-96    80     
128    -64    
-32    -304   
-112   -48    
-32    -240   
-64    -48    
128    -320   
144    64     
208    272    
-96    80     
48     -3296  
320    384    
-336   -400   
288    240    
-16    352    
-16    -528   
128    352    
128    -352   
-208   -96    
-32    224    
-624   -160   
144    -336   
128    -288   
-16    -816   
-112   384    
480    -1520  
-128   96     
96     -64    
-208   -144   
368    112    
-144   16     
-112   -32    
-16    -48    
80     64     
48     16     
-1056  -32    
192    0      
-16    -48    
64     -96    
16     32     
64     -496   
-64    -256   
112    -768   
-128   96     
240    -528   
-144   -16    
128    -64    
-32    64     
16     144    
0      -192   
-224   -32    
-64    -288   
-656   -160   
80     160    
352    80     
-144   0      
224    96     
-32    -1328  
64     96     
48     -16    
96     -16    
-80    16     
16     -96    
-64    -32    
176    48     
-112   416    
0      48     
-272   16     
144    -128   
-96    -16    
96     -432   
48     80     
-160   -368   
-272   -384   
-32    -176   
-16    -192   
-16    32     
80     96     
-288   -16    
-16    -144   
64     144    
-16    48     
-208   -16    
-16    -176   
144    -16    
64     -144   
224    0      
-32    -80    
80     16     
-48    0      
96     -48    
-544   -16    
-32    -272   
-32    48     
96     -288   
80     -96    
176    16     
-32    -48    
32     -64    
112    -16    
144    144    
176    176    
-224   -544   
480    288    
-144   464    
160    160    
-96    -48    
0      -112   
128    -64    
288    336    
-240   176    
-32    -400   
192    96     
-128   -144   
304    -320   
-528   128    
48     144    
-192   -336   
-352   96     
-240   -656   
-368   224    
400    -384   
-224   304    
-464   -96    
288    -48    
16     -272   
128    192    
-128   -32    
-432   -512   
-16    64     
32     48     
-272   112    
-96    -208   
-480   16     
336    512    
-528   -320   
-16    -80    
-816   -96    
160    80     
-48    -96    
80     -32    
32     -176   
0      -160   
16     -288   
-80    -256   
320    64     
-144   176    
0      0      
-64    128    
128    304    
-224   704    
-48    208    
-496   -416   
-192   -160   
64     -176   
-192   -16    
-816   -224   
-32    16     
-480   -640   
32     -144   
48     -208   
32     48     
-160   32     
-48    112    
-144   240    
16     64     
-80    48     
-96    -64    
-80    -64    
-32    -64    
-160   -160   
-384   -128   
160    64     
-64    -160   
336    176    
-32    64     
-128   48     
-176   32     
-64    -48    
272    192    
-144   112    
-16    -32    
-272   -320   
464    96     
-400   0      
320    16     
-928   -96    
288    0      
-80    -32    
96     144    
-128   -64    
16     -96    
32     -48    
144    80     
48     96     
-192   -16    
-32    64     
-80    0      
0      48     
48     -80    
-80    -32    
-336   -48    
64     144    
-528   -256   
112    0      
160    144    
112    64     
48     48     
160    112    
80     144    
-112   80     
64     96     
80     48     
160    352    
-16    -112   
-32    -48    
-64    48     
160    80     
-912   -80    
160    -1632  
80     -16    
-80    -96    
-32    192    
48     -16    
-16    0      
-128   160    
240    192    
48     112    
-32    128    
-112   0      
32     176    
16     -64    
32     32     
-144   208    
32     64     
-112   -32    
112    64     
256    48     
-272   192    
-80    -256   
80     96     
192    64     
-320   48     
48     0      
-352   -48    
160    80     
-320   -64    
64     64     
-16    144    
64     16     
176    80     
160    96     
-64    16     
-112   144    
240    32     
48     160    
-128   -48    
16     64     
64     64     
-80    -16    
80     64     
32     80     
64     64     
96     96     
-96    32     
96     96     
-128   0      
128    48     
48     144    
-112   -64    
-80    48     
464    352    
-496   96     
48     144    
32     32     
32     16     
32     -48    
-176   -112   
144    32     
-48    -48    
192    64     
-240   192    
352    176    
-48    144    
0      32     
96     80     
-16    16     
-48    64     
96     176    
-128   128    
64     224    
-48    272    
-128   64     
112    112    
96     160    
48     80     
160    16     
-32    48     
96     0      
-144   -48    
16     -112   
128    64     
80     192    
-32    80     
-96    0      
96     80     
-80    32     
352    368    
-176   320    
-48    96     
48     16     
16     -32    
64     96     
32     64     
-144   -16    
96     64     
-32    112    
-48    -96    
16     32     
-16    16     
-64    64     
176    -32    
128    176    
0      144    
0      -16    
-144   48     
160    32     
32     144    
32     16     
-16    80     
-112   0      
-96    -144   
352    -400   
160    32     
96     128    
0      -352   
-16    32     
352    -48    
48     80     
48     48     
160    208    
32     16     
240    16     
-160   0      
256    80     
-80    64     
144    96     
-144   -176   
352    16     
-192   96     
80     -256   
-16    64     
208    -560   
-128   48     
-64    -128   
128    -208   
144    96     
272    224    
-16    128    
144    -80    
-32    -80    
160    48     
128    -64    
192    96     
96     64     
-32    -240   
144    32     
208    128    
-64    160    
192    128    
-128   192    
-160   -16    
192    -128   
112    0      
176    128    
16     -64    
16     80     
48     80     
288    176    
0      96     
-112   -144   
32     32     
-64    -448   
-224   -384   
-64    -720   
16     288    
-48    352    
0      384    
-96    96     
16     400    
-192   112    
48     -80    
-112   48     
48     -16    
16     144    
208    80     
-176   208    
144    -208   
-224   -384   
304    -320   
-32    288    
304    240    
-80    384    
32     48     
112    -192   
16     -96    
160    256    
-32    352    
0      -224   
160    48     
48     80     
-64    -16    
48     -288   
80     0      
-16    -144   
48     -16    
-176   -1168  
224    -64    
-224   -48    
176    -240   
-80    -240   
128    96     
48     32     
-32    -80    
-160   -48    
304    -304   
-48    144    
-16    -192   
112    80     
48     -480   
160    112    
-128   96     
224    96     
-32    32     
64     80     
0      64     
-176   96     
432    -16    
-176   -352   
224    144    
-80    -128   
-16    96     
96     144    
48     240    
-80    -32    
112    48     
48     48     
-48    32     
-16    -16    
32     -80    
-80    -336   
-32    -272   
240    80     
-112   -32    
48     112    
-32    -144   
16     144    
48     -128   
-48    64     
160    -112   
48     96     
64     -16    
80     -224   
208    -48    
-16    -1120  
-80    -16    
-224   240    
32     -48    
-64    -288   
32     -464   
112    32     
0      -128   
112    -16    
48     256    
96     -16    
112    112    
48     64     
320    -336   
-288   304    
-80    -496   
144    -528   
-240   80     
192    -384   
96     -80    
96     -112   
-64    -48    
48     -944   
240    176    
128    176    
-128   -704   
-48    -480   
352    544    
16     80     
32     0      
144    208    
-48    -112   
-432   -288   
80     -176   
-336   -896   
160    -752   
-32    -208   
384    -240   
-96    224    
144    -2752  
32     64     
-80    -576   
0      256    
64     64     
80     -224   
-144   -224   
32     0      
-448   16     
0      80     
-1168  112    
32     240    
176    -192   
-320   -448   
176    -144   
-80    -512   
192    32     
224    -144   
0      0      
96     -48    
0      144    
-112   400    
240    320    
-64    112    
64     -32    
-256   -48    
-96    -432   
224    -576   
-96    -624   
528    80     
128    -16    
64     208    
-240   -1328  
-48    240    
240    144    
-272   -192   
32     -16    
-64    -32    
-16    64     
64     -144   
-304   -96    
64     -16    
-2336  -112   
416    32     
-208   96     
-128   -256   
208    -272   
-160   -112   
304    32     
64     -64    
240    80     
256    -16    
-304   32     
640    16     
-400   32     
288    -32    
-288   0      
128    80     
-96    48     
-512   -80    
-96    -384   
64     0      
192    -640   
96     64     
128    32     
16     0      
64     -96    
256    -224   
-352   112    
336    -48    
-160   16     
112    64     
-272   192    
160    224    
-16    0      
-128   -304   
352    112    
-128   -208   
192    48     
-192   192    
112    48     
-272   -64    
144    48     
-112   -64    
224    -16    
32     112    
32     -176   
-176   16     
48     -192   
-32    96     
144    -160   
-112   -16    
16     -128   
-16    32     
-144   -16    
32     -16    
0      48     
-176   64     
-80    80     
16     -16    
-352   -96    
32     -32    
-240   144    
-128   -64    
64     -192   
-704   0      
192    80     
-192   -240   
-464   -32    
-16    64     
-144   64     
-96    -176   
-1504  -224   
-64    -128   
64     -48    
16     16     
-144   -16    
128    -16    
-48    64     
0      144    
-176   -288   
-48    48     
-32    0      
-32    80     
0      32     
-144   384    
272    -32    
-448   -96    
112    144    
-832   -32    
-96    96     
176    -48    
80     -112   
-16    64     
16     -80    
-272   -208   
304    336    
-32    80     
-32    48     
64     -64    
-64    -48    
0      -80    
-96    32     
-16    -48    
-176   192    
224    336    
-560   16     
-16    32     
-16    -112   
-32    64     
0      32     
208    128    
-240   208    
-144   0      
96     160    
-128   16     
-32    272    
64     48     
-80    -32    
-384   -64    
16     64     
-384   64     
48     96     
128    -80    
-64    16     
80     -192   
-32    -32    
-96    80     
-48    -16    
0      32     
-192   48     
224    32     
0      -64    
-16    16     
-464   -480   
192    -64    
-224   160    
-384   96     
128    -64    
-16    64     
-288   128    
272    80     
64     0      
-272   48     
16     208    
-128   176    
96     48     
-48    80     
16     144    
-416   -48    
176    16     
-112   -16    
64     32     
-624   48     
-112   176    
-80    48     
-192   16     
160    112    
-96    16     
16     64     
-256   -192   
-48    -80    
-32    64     
80     -16    
-224   48     
224    192    
-400   -160   
224    160    
-1600  0      
-144   48     
272    352    
-400   224    
-176   -256   
80     0      
-16    176    
-160   -240   
-32    -192   
368    448    
-192   112    
-256   0      
16     288    
-480   -32    
128    -48    
-224   96     
48     -304   
-480   -544   
224    -208   
-48    112    
-64    64     
256    320    
-256   160    
64     192    
-96    -16    
64     16     
-144   -96    
64     160    
192    192    
-80    80     
128    64     
-32    -16    
-16    -112   
-144   -64    
0      0      
-128   -112   
-144   80     
-144   -320   
-176   -272   
192    112    
-224   0      
64     -176   
80     32     
304    160    
-176   128    
240    144    
-112   -112   
16     112    
0      96     
32     112    
-16    -32    
176    128    
-80    -32    
-16    304    
-112   224    
368    160    
16     -240   
-32    -464   
-112   -176   
-48    144    
64     208    
-192   -160   
-48    -144   
0      160    
-304   -320   
160    208    
-112   -112   
176    112    
-48    176    
96     48     
128    528    
-32    -48    
144    32     
-96    0      
-48    0      
112    80     
32     96     
48     96     
-16    32     
64     80     
-16    96     
112    304    
-112   160    
96     144    
0      -48    
128    336    
-352   -48    
48     -336   
112    144    
48     -48    
-16    -112   
-48    64     
-64    16     
-64    48     
0      -176   
128    320    
192    384    
48     160    
-32    160    
0      -32    
-48    144    
-64    -336   
112    256    
128    288    
-192   32     
320    400    
32     592    
-32    224    
16     -16    
-128   128    
144    96     
224    16     
-304   80     
128    16     
-80    64     
192    80     
-112   112    
96     -112   
32     128    
-16    -32    
48     112    
-96    112    
336    304    
0      144    
-32    224    
176    -176   
-176   96     
64     224    
-16    144    
64     336    
96     288    
-16    144    
-288   -64    
-80    -448   
160    -1456  
-144   -112   
32     -160   
144    48     
-16    144    
96     224    
-96    176    
288    304    
-208   16     
96     16     
0      -128   
80     96     
112    208    
32     -336   
128    -80    
48     -48    
-32    -80    
576    208    
-544   -672   
368    -64    
-176   32     
240    320    
-176   -320   
-144   -960   
416    320    
-192   400    
192    -144   
16     160    
16     -32    
112    144    
-48    -320   
-48    192    
176    -480   
-16    288    
-48    96     
112    -32    
-32    144    
224    16     
-80    -48    
96     288    
-192   32     
288    96     
-224   -208   
48     -112   
48     144    
160    -640   
-192   -128   
304    -720   
-240   -16    
448    -1008  
-464   -288   
-64    -368   
112    -336   
32     -96    
160    32     
16     192    
80     32     
208    224    
-128   -112   
128    96     
-48    -128   
240    352    
32     -176   
-32    0      
144    -640   
144    192    
32     208    
-80    112    
32     -112   
48     16     
128    736    
176    -176   
-64    -224   
432    32     
-96    224    
-160   32     
176    48     
-32    -80    
160    208    
-304   -240   
-64    -320   
384    -528   
64     -16    
144    -96    
32     -48    
176    64     
-160   -48    
80     160    
-16    -144   
176    176    
-320   -112   
48     -48    
-16    -256   
160    64     
-16    -96    
-48    48     
144    16     
192    -736   
-96    112    
-48    -80    
-16    -736   
-240   -496   
240    -576   
16     -112   
80     128    
48     -160   
64     128    
96     -64    
-112   16     
192    80     
272    -1616  
-96    -80    
352    -736   
256    -256   
-688   -48    
-80    -272   
32     16     
128    -480   
-48    0      
176    -1888  
-32    -64    
-80    -224   
256    128    
224    -48    
-224   96     
32     -64    
-240   32     
96     112    
-112   -32    
-80    0      
-112   -32    
80     -80    
0      -448   
48     -96    
112    -336   
112    64     
96     320    
-64    -128   
272    32     
80     64     
48     -144   
224    192    
-320   -32    
160    16     
-352   -80    
112    -32    
128    -64    
48     -64    
48     -32    
240    96     
-96    -64    
80     -192   
96     -48    
64     0      
64     64     
0      32     
208    192    
-32    32     
-128   -192   
160    -112   
208    -80    
-416   0      
0      0      
96     0      
-32    -128   
48     -32    
160    -656   
-128   -336   
48     0      
432    496    
-432   96     
272    -128   
-224   -16    
256    -144   
-96    0      
0      -48    
-176   -32    
16     -112   
48     -64    
48     -608   
-176   160    
48     32     
-16    80     
48     -1424  
144    240    
176    -64    
-128   -240   
48     208    
144    144    
-368   16     
224    96     
-272   32     
64     -48    
-480   0      
32     -48    
-32    128    
240    48     
16     208    
0      -752   
112    -256   
96     16     
96     32     
-64    80     
192    -48    
-144   32     
112    -112   
-384   -16    
48     -144   
16     -96    
16     -48    
176    112    
80     -208   
-32    16     
128    -336   
64     112    
112    32     
48     0      
-704   -192   
-64    -224   
0      -48    
64     48     
-144   32     
80     -16    
-32    0      
-64    -224   
112    -32    
208    -176   
-144   32     
176    -80    
-32    224    
64     64     
-80    0      
-96    0      
112    32     
-208   -48    
224    -64    
272    256    
-224   144    
-224   -16    
208    -176   
-128   192    
-224   -480   
176    -336   
-944   -144   
-32    0      
-272   -320   
-912   -336   
192    208    
-272   96     
80     32     
-48    -16    
-160   -32    
48     -128   
-64    96     
160    16     
-48    192    
-80    32     
32     48     
-96    -96    
-480   16     
-16    112    
16     64     
-48    192    
-400   224    
48     80     
-336   -144   
160    160    
112    352    
-160   416    
208    608    
-304   624    
80     -16    
-128   96     
-176   -112   
-48    -112   
0      128    
-96    96     
112    176    
-176   -160   
-224   -288   
240    -64    
-96    32     
-224   -16    
144    128    
-80    288    
32     336    
-80    -416   
128    272    
-112   352    
-128   -176   
160    -80    
-80    192    
-144   -48    
-208   -128   
-144   48     
144    64     
80     -176   
-64    -112   
80     -144   
32     -64    
160    112    
-16    -128   
128    160    
-160   -16    
256    304    
-352   176    
160    -176   
32     688    
-240   0      
80     32     
-16    -48    
32     96     
-720   -64    
32     144    
-80    224    
-96    208    
-64    -448   
112    128    
48     96     
0      480    
-240   -128   
-128   -368   
112    432    
-112   -144   
32     -256   
-96    416    
64     96     
-16    272    
-96    64     
160    -336   
224    640    
-176   256    
-16    -224   
0      160    
-224   -240   
256    192    
-272   96     
384    64     
-256   -32    
-16    96     
-16    -32    
-96    48     
-352   -448   
256    176    
-544   384    
-144   528    
384    208    
-256   -176   
-176   -144   
144    -112   
-32    32     
-80    -176   
-16    -48    
-128   -112   
-96    -160   
-64    -288   
-208   -496   
-352   -464   
224    320    
-1104  96     
-128   80     
-32    176    
224    480    
-256   240    
128    -16    
-144   80     
144    -32    
96     384    
80     368    
-32    -272   
16     16     
0      128    
16     -16    
128    96     
-192   96     
0      32     
48     144    
-64    48     
-16    32     
-64    16     
64     80     
-96    32     
-32    32     
160    0      
-96    -64    
-208   -432   
368    -64    
-144   304    
-32    32     
64     -608   
224    496    
-192   432    
32     -704   
112    160    
-112   32     
48     -80    
-48    448    
112    400    
-240   -96    
-16    -96    
0      160    
-112   -32    
48     288    
-32    176    
-32    192    
80     -176   
-16    -16    
-96    112    
64     -16    
-16    48     
16     16     
0      -144   
0      128    
320    384    
-336   -336   
64     -128   
48     160    
-112   144    
80     64     
16     -64    
48     -64    
-80    80     
80     64     
144    -48    
80     -32    
-96    112    
48     -160   
128    -240   
-160   64     
288    160    
-144   -32    
240    224    
-144   192    
-32    112    
-160   -352   
-128   -304   
304    -64    
-208   144    
16     32     
-160   16     
64     192    
-64    80     
48     144    
-128   -96    
160    176    
-368   -160   
336    80     
80     96     
-48    80     
80     64     
-144   48     
48     96     
16     144    
80     96     
32     80     
0      16     
112    -48    
288    80     
-368   -32    
464    96     
-128   48     
192    -80    
-48    -32    
176    -128   
-48    64     
176    112    
-320   -336   
416    176    
-48    128    
-64    0      
176    208    
-208   -32    
160    208    
-160   16     
16     48     
-96    -32    
240    288    
-96    480    
-192   352    
112    -48    
-128   -48    
240    -96    
160    128    
32     144    
-144   144    
-96    48     
-176   -48    
-144   96     
-16    240    
192    144    
-80    48     
160    -80    
16     48     
32     -1232  
288    176    
-96    80     
-112   -16    
64     -32    
-112   -96    
-96    112    
-64    80     
0      224    
-32    272    
-80    288    
32     176    
-208   160    
80     16     
-144   -48    
32     -112   
64     96     
192    -144   
144    128    
80     32     
240    160    
-32    -272   
-16    -16    
304    336    
-64    320    
-528   16     
-96    -240   
128    0      
256    32     
-144   192    
-48    48     
64     0      
48     -400   
144    64     
-80    80     
32     80     
-16    16     
48     16     
32     16     
80     128    
448    416    
-400   -16    
256    -48    
-48    -32    
48     112    
-144   -368   
208    32     
192    -464   
-144   96     
192    -448   
128    128    
-112   48     
176    48     
128    176    
176    192    
112    64     
-80    -32    
160    128    
16     -368   
64     -16    
128    -288   
144    128    
-64    0      
32     96     
64     -32    
80     128    
-48    -16    
32     112    
144    128    
-48    64     
272    192    
-224   -144   
320    544    
96     -144   
-64    -32    
128    -80    
144    112    
48     -224   
0      96     
16     400    
32     -32    
-16    112    
416    256    
-160   240    
80     -144   
-32    -64    
128    -160   
192    160    
144    16     
0      112    
96     -32    
-80    160    
144    -32    
-48    -48    
208    -48    
16     -64    
128    -112   
48     -1104  
272    80     
112    -16    
-128   -512   
80     144    
192    -832   
-32    -32    
112    -16    
0      -144   
48     0      
48     -112   
320    240    
-192   272    
128    160    
-80    32     
96     -192   
-32    -928   
-608   -96    
240    704    
-32    320    
-32    -176   
240    144    
-112   -1952  
80     -96    
112    112    
-96    -128   
48     -128   
144    160    
16     -128   
-128   0      
-384   -112   
48     64     
-272   32     
176    16     
-96    -32    
192    256    
-128   -480   
0      -304   
64     112    
32     -416   
32     176    
176    -96    
-96    -208   
96     -208   
128    80     
16     160    
48     464    
-304   -464   
0      128    
48     -624   
112    -256   
-64    128    
-32    320    
256    352    
-80    -416   
48     -160   
48     -176   
0      112    
-32    -64    
112    128    
-128   544    
48     -576   
-432   16     
304    240    
-720   208    
-64    -704   
192    112    
48     -336   
-160   -80    
-16    -912   
368    128    
-80    288    
160    -256   
224    0      
112    96     
240    48     
80     112    
-64    -32    
96     176    
-32    0      
128    32     
32     64     
-64    -176   
160    -224   
-96    -560   
320    64     
-16    -304   
96     160    
32     -144   
752    416    
-320   736    
-384   -496   
-32    -496   
128    368    
-432   -128   
-96    -384   
-416   -512   
160    96     
-352   464    
176    -112   
0      -16    
112    -768   
-32    112    
-256   16     
112    -144   
16     -16    
64     -32    
-144   112    
144    -448   
-224   -352   
144    -304   
-80    -16    
-160   240    
256    352    
-256   32     
144    -736   
-48    -560   
16     48     
48     240    
48     464    
-112   -176   
16     160    
-160   -176   
448    432    
-464   240    
32     -432   
-848   96     
0      -288   
96     -96    
48     -272   
192    288    
64     64     
240    -144   
-192   544    
256    -576   
-112   160    
64     48     
-48    -96    
128    144    
-64    -208   
-16    -32    
-64    -176   
-144   -48    
144    96     
-544   -112   
48     144    
-64    16     
-1152  -48    
-272   -320   
-288   80     
-112   -224   
256    176    
0      352    
128    880    
64     -1168  
0      0      
-256   688    
-432   -1232  
384    64     
-352   304    
272    512    
-144   160    
-272   -464   
576    80     
-448   704    
304    272    
-80    -64    
-208   -16    
-32    16     
-176   -128   
144    -80    
-96    -528   
48     176    
-112   160    
-64    192    
-64    144    
-32    -64    
-64    32     
-80    -304   
32     48     
-32    192    
-496   -32    
64     32     
-336   -48    
32     96     
80     32     
16     64     
0      -48    
-48    128    
-128   -608   
-80    -160   
32     -16    
-32    352    
160    480    
-288   -480   
-32    -208   
-336   224    
96     48     
-80    144    
-16    336    
-208   -304   
80     32     
-16    128    
16     144    
144    -64    
-32    48     
192    96     
-112   64     
-192   -96    
-128   -16    
-32    0      
-48    32     
304    208    
-224   32     
-48    144    
-608   160    
144    192    
-96    -32    
64     -16    
0      64     
-112   -112   
224    -48    
-240   -16    
208    80     
48     144    
-64    32     
-16    16     
112    -96    
-176   -112   
32     80     
-80    -32    
-96    32     
32     -32    
208    304    
-368   -16    
-96    48     
96     16     
-64    112    
64     64     
-48    80     
256    16     
-544   80     
128    96     
-544   32     
304    160    
-224   96     
48     80     
80     -320   
-64    -96    
64     80     
-16    128    
96     240    
-80    16     
80     64     
0      96     
-32    16     
-32    176    
192    160    
-16    96     
64     144    
112    -16    
-80    -16    
96     -304   
32     -240   
-96    -304   
336    224    
48     352    
32     48     
0      64     
-16    448    
304    560    
-128   224    
160    208    
-48    144    
48     352    
-352   48     
-144   96     
80     -16    
-224   0      
368    -128   
0      128    
288    16     
160    -64    
352    -240   
-416   -736   
208    -480   
96     48     
64     96     
-368   -48    
128    -240   
-224   -192   
-144   256    
-48    192    
-176   224    
0      224    
-416   -16    
-144   -16    
-48    144    
0      80     
-16    64     
-16    -144   
80     -336   
224    240    
48     336    
160    416    
-208   224    
-128   0      
80     -16    
16     32     
64     112    
-112   32     
-96    64     
80     -96    
544    160    
-112   64     
48     16     
-176   -48    
224    112    
16     32     
-64    144    
240    128    
-128   16     
0      32     
16     -208   
160    144    
96     96     
-128   32     
80     48     
48     -112   
-224   96     
80     96     
-208   80     
64     96     
-144   32     
112    96     
-96    48     
48     80     
32     32     
-160   16     
160    32     
64     224    
-304   -208   
336    -112   
16     80     
160    32     
-48    144    
96     80     
96     80     
-112   96     
-80    -176   
-16    160    
128    80     
48     32     
32     -64    
128    128    
48     80     
112    80     
64     48     
48     -80    
-80    32     
256    240    
-208   112    
192    144    
-80    -64    
96     -208   
160    96     
-32    48     
32     0      
32     144    
112    176    
-64    96     
48     112    
176    176    
-144   96     
-80    96     
48     128    
-224   -432   
112    0      
-32    -16    
160    -48    
-96    32     
32     336    
192    80     
-80    96     
128    80     
144    624    
48     144    
-224   -32    
320    112    
-160   16     
368    480    
0      624    
-48    352    
96     0      
-80    0      
0      -48    
-32    -912   
128    224    
96     288    
0      64     
96     176    
-112   144    
-96    -272   
144    192    
-64    64     
-16    48     
0      -128   
80     -48    
48     160    
-80    -464   
112    32     
-64    0      
144    -48    
112    1040   
80     -256   
384    464    
-32    720    
80     -112   
112    352    
32     -464   
224    -48    
48     192    
176    48     
112    -32    
80     80     
32     96     
80     -128   
96     80     
-144   -1840  
128    176    
128    240    
-48    544    
80     64     
144    32     
-32    48     
32     96     
64     48     
0      -16    
112    80     
112    176    
144    576    
-208   -432   
-32    0      
176    -608   
16     32     
176    -48    
32     208    
-96    16     
432    96     
-128   176    
320    -48    
16     64     
144    144    
80     96     
48     -128   
112    32     
-192   -656   
96     -16    
-16    -128   
0      144    
176    112    
-432   48     
384    96     
48     208    
-272   -16    
32     -80    
-176   112    
144    32     
-32    128    
304    -272   
-128   -32    
144    -16    
-144   -80    
208    32     
-48    336    
80     -416   
-112   256    
240    128    
-288   304    
176    64     
48     336    
272    -1248  
-272   -80    
-128   80     
304    -272   
0      -112   
32     352    
336    416    
48     208    
-96    -512   
-48    -576   
224    144    
-112   -80    
-64    -272   
224    -128   
64     112    
-96    -320   
48     224    
-80    16     
0      -48    
-80    288    
32     -272   
-192   304    
-64    -256   
16     -448   
-128   -80    
288    -336   
-128   160    
-64    -720   
128    -320   
-976   -432   
48     768    
80     -96    
-96    -48    
-64    -32    
352    32     
-384   -496   
384    176    
-320   -144   
992    480    
-992   -560   
544    -480   
-192   816    
-16    -208   
112    -272   
0      224    
-32    -96    
112    32     
112    -288   
80     240    
-64    -448   
288    -32    
-224   -192   
144    32     
48     288    
-64    -192   
-96    -480   
-16    16     
32     240    
32     64     
-272   -32    
64     -112   
-192   -32    
208    0      
-112   -32    
128    -144   
-16    144    
240    -1456  
48     -96    
32     -256   
240    640    
80     176    
-48    -208   
-80    16     
192    -160   
-128   64     
336    320    
-832   -400   
128    -224   
128    16     
-48    64     
112    32     
144    -48    
80     144    
64     -240   
96     -64    
176    80     
-176   -80    
-128   16     
144    32     
-96    144    
224    -64    
-80    80     
96     16     
-656   0      
0      -240   
112    -16    
256    -192   
-192   0      
304    -800   
-352   192    
-48    -48    
80     -160   
0      112    
0      144    
-32    144    
112    -64    
-912   -128   
288    -144   
-1392  -176   
128    -64    
-96    32     
112    -112   
-80    -32    
96     -576   
-128   -368   
-192   -112   
112    48     
-16    80     
-96    -96    
0      -64    
-48    0      
16     32     
-16    16     
-112   -48    
16     16     
-16    -320   
96     -496   
144    160    
-96    112    
16     -64    
144    -128   
80     96     
96     64     
-80    32     
-96    0      
128    0      
-320   192    
128    48     
-96    16     
160    -176   
-48    64     
112    -208   
-48    16     
128    -96    
-80    0      
224    272    
-176   48     
-160   -80    
176    -304   
-128   -96    
144    -16    
64     16     
64     -80    
144    48     
-1360  -160   
32     80     
-336   -384   
64     -48    
48     96     
-496   -64    
64     -16    
-496   16     
208    240    
-640   192    
-96    48     
192    -80    
224    128    
-1664  -224   
-64    144    
-240   160    
256    496    
-416   112    
16     32     
80     48     
-352   -64    
32     -48    
-224   -224   
224    192    
-176   -96    
-112   32     
-1776  0      
-144   0      
-48    -48    
-80    -32    
336    -16    
-176   -48    
16     -240   
-80    144    
64     96     
-288   96     
32     80     
-160   -80    
-32    -16    
-288   -48    
-48    128    
-432   208    
-144   208    
-64    32     
208    624    
128    112    
-208   -64    
128    -112   
32     80     
-128   80     
-144   112    
208    -16    
-80    -176   
-32    -112   
-80    32     
144    176    
-256   48     
-112   -32    
-368   64     
-16    48     
-80    -192   
48     144    
192    144    
-96    -16    
80     208    
32     -32    
-128   16     
-64    0      
32     -16    
-128   96     
-16    32     
-160   0      
160    32     
-240   -160   
-80    160    
32     -48    
-160   32     
128    128    
-48    64     
-80    -64    
-144   -96    
0      -16    
-16    64     
-32    112    
-64    208    
288    144    
-400   -64    
112    80     
-144   -64    
-80    -176   
144    -16    
-64    96     
-224   -64    
-128   0      
96     32     
-48    64     
-64    0      
32     -32    
-112   0      
160    32     
-64    32     
-80    32     
-48    -32    
-32    -80    
16     80     
-240   -48    
-128   32     
-32    48     
-112   -128   
48     16     
-112   32     
64     64     
0      16     
-16    48     
-336   -80    
176    32     
80     224    
-48    384    
-240   32     
160    112    
-192   32     
16     48     
-48    80     
48     144    
112    192    
-48    64     
32     128    
-48    64     
64     144    
-144   208    
208    240    
-64    192    
-336   -944   
96     208    
16     720    
-32    -592   
144    256    
48     224    
96     -48    
32     80     
32     80     
-48    32     
48     80     
80     80     
-32    0      
48     112    
-80    64     
64     64     
-416   -848   
272    -112   
0      432    
-64    -272   
32     672    
96     -192   
-32    112    
-48    144    
80     -48    
-96    160    
112    16     
-32    176    
-64    -144   
112    16     
-304   -32    
240    -672   
-64    464    
304    256    
-96    128    
0      32     
112    160    
32     128    
64     80     
-112   -80    
80     -176   
160    448    
-240   -16    
32     0      
-80    -128   
0      48     
48     -48    
112    32     
80     384    
0      304    
-80    224    
192    448    
-80    144    
-240   -176   
176    -96    
-160   0      
112    64     
-112   64     
192    112    
-160   -64    
128    -832   
64     208    
144    32     
-48    80     
16     32     
64     112    
-64    80     
32     96     
-224   -240   
320    -96    
-160   176    
480    192    
-176   160    
144    112    
-128   112    
112    -544   
96     16     
-112   -208   
-144   -96    
240    144    
-128   -32    
32     96     
128    32     
80     208    
0      224    
224    304    
-96    448    
-16    -144   
-176   -224   
-208   0      
320    -432   
128    256    
-80    160    
272    -160   
16     144    
80     224    
128    80     
432    80     
-144   208    
16     -224   
256    -96    
-16    96     
-96    -64    
144    80     
16     384    
64     -48    
128    -16    
48     -928   
-160   320    
624    448    
-304   320    
-96    -224   
-64    48     
-80    -32    
80     -64    
-16    -16    
144    208    
-32    304    
32     -304   
-16    -816   
416    240    
-208   -160   
48     -816   
32     160    
16     96     
0      336    
-80    -512   
-336   288    
128    -400   
-160   96     
128    48     
-240   -16    
80     608    
144    240    
-368   -224   
96     -96    
48     96     
-16    208    
448    752    
48     -1712  
0      336    
96     48     
-96    -128   
-144   -224   
176    48     
160    352    
-240   272    
-112   160    
176    -160   
-272   -544   
-80    -448   
224    -16    
-16    32     
64     48     
-80    -608   
176    -112   
16     -368   
272    128    
16     0      
160    48     
-48    64     
192    272    
128    96     
-112   -256   
80     -160   
192    -144   
400    352    
-176   -208   
-16    464    
128    -432   
-112   -144   
192    -96    
80     112    
-80    128    
192    144    
-304   -80    
224    -144   
80     128    
-16    -224   
320    144    
224    -112   
64     208    
-64    -192   
112    16     
32     -128   
48     128    
0      32     
64     32     
-96    -64    
304    -48    
16     48     
128    64     
16     48     
112    -64    
128    144    
-96    -64    
112    80     
-64    48     
160    80     
-160   -160   
304    16     
-144   64     
208    -16    
0      16     
64     -96    
0      -688   
-16    -224   
80     -576   
64     0      
-320   -272   
400    -128   
-80    256    
304    -208   
-48    64     
32     -288   
48     -1776  
-80    -128   
96     -256   
-112   64     
112    -304   
-32    -64    
112    -144   
96     -288   
32     -64    
80     -80    
144    16     
64     -32    
64     -160   
80     -16    
-80    -304   
128    -256   
128    96     
-80    -208   
96     80     
32     -16    
272    -32    
-352   32     
64     -112   
0      -32    
160    -64    
64     -112   
16     -1296  
32     -80    
-16    64     
128    32     
48     64     
96     192    
-208   -48    
32     16     
-160   0      
-128   96     
-272   128    
-192   -80    
48     -128   
128    -192   
96     -64    
64     -336   
80     -48    
-176   -288   
80     144    
80     -112   
-32    -128   
112    -192   
0      -208   
-32    -128   
-32    80     
48     112    
-48    16     
-64    64     
96     -208   
0      -144   
96     64     
64     128    
-176   -272   
48     32     
128    16     
80     272    
-32    -80    
144    -48    
192    160    
48     -128   
-336   -128   
176    -112   
-192   -48    
48     -48    
-208   80     
-16    -48    
-16    -16    
-112   -240   
-16    -16    
-32    -816   
80     80     
-80    -16    
96     -80    
-352   -352   
160    -256   
80     160    
64     0      
-320   -16    
176    112    
-288   -112   
96     -176   
-32    -48    
80     -416   
64     144    
160    -512   
-32    -32    
-96    0      
256    -48    
-464   -48    
208    80     
-256   16     
112    48     
-32    304    
-384   112    
-400   -48    
32     -96    
-80    64     
48     -320   
80     128    
112    -688   
0      -224   
-32    -32    
48     -64    
-240   112    
80     96     
-96    96     
-192   -80    
48     80     
16     -160   
32     48     
128    -16    
16     -64    
224    -128   
48     160    
112    -256   
-160   -32    
48     64     
-176   -80    
96     -48    
64     16     
-160   64     
-192   -32    
-160   -64    
176    144    
-224   144    
-160   -48    
160    144    
-480   -112   
-112   -160   
336    32     
-944   160    
-64    -16    
-896   -32    
128    -144   
128    112    
-32    32     
96     -112   
-240   16     
192    80     
-96    160    
-1056  -112   
-160   176    
-208   128    
128    304    
-224   -80    
160    -304   
-48    16     
-272   -144   
-160   -96    
-128   160    
-112   48     
80     -64    
-176   -368   
208    96     
16     -16    
16     -96    
32     112    
-80    -224   
-208   -320   
304    -208   
-304   144    
-112   -240   
-128   -128   
208    128    
-320   208    
128    224    
-1760  -224   
80     320    
-192   -304   
144    208    
-64    -64    
48     144    
-160   -368   
-64    112    
128    -80    
-448   -160   
208    -480   
80     240    
-16    480    
-176   128    
48     -224   
-1056  0      
144    96     
-48    -16    
32     48     
0      -32    
32     112    
0      80     
-64    -48    
0      32     
16     64     
-80    32     
144    48     
-176   224    
-288   -240   
208    -64    
-160   112    
128    48     
-1216  96     
208    48     
-112   -80    
-48    -96    
-16    0      
-80    48     
-16    16     
-224   80     
-32    -80    
-112   -64    
0      64     
64     64     
0      96     
-96    32     
144    96     
-640   -32    
192    96     
-112   48     
96     144    
224    160    
-288   176    
-48    0      
-32    0      
0      -16    
-128   -176   
224    160    
224    496    
368    816    
-576   304    
416    464    
-80    608    
128    608    
96     -112   
-96    64     
160    64     
-112   -48    
-16    96     
64     400    
144    208    
-48    96     
-128   96     
0      -128   
-96    80     
-80    -48    
16     128    
-240   -176   
0      -368   
240    128    
-16    32     
-96    -144   
-96    -48    
-192   -112   
96     -32    
16     96     
-80    16     
48     48     
288    256    
-304   336    
0      -672   
112    -160   
-32    368    
16     48     
-272   -240   
16     -656   
128    64     
-144   672    
-272   -48    
-176   -448   
240    224    
-464   96     
128    96     
-128   32     
16     80     
-64    -304   
224    160    
0      224    
-64    96     
112    0      
-176   -368   
-368   -1024  
192    128    
-80    240    
-224   -112   
176    224    
-128   176    
-192   -512   
-96    -416   
112    -384   
-224   -192   
96     -32    
-32    0      
144    144    
96     176    
416    224    
-96    128    
-16    32     
-144   -416   
-32    -160   
112    0      
-128   -16    
-32    64     
-32    -16    
96     64     
-256   -128   
400    -16    
32     144    
224    80     
80     128    
48     320    
64     48     
32     -16    
336    320    
-352   64     
-32    -32    
144    144    
112    -32    
-96    -256   
400    -144   
32     144    
240    160    
-64    80     
160    -16    
0      0      
112    160    
144    240    
-48    80     
416    448    
-416   144    
160    112    
-112   144    
64     64     
-112   16     
-64    16     
112    80     
16     -1792  
-64    64     
16     160    
64     64     
-64    48     
64     112    
-80    176    
16     80     
-112   48     
-288   16     
96     32     
128    224    
-320   -48    
208    -16    
-160   -128   
112    -928   
32     64     
304    192    
-160   80     
-128   -160   
80     -144   
192    272    
144    192    
-272   128    
80     48     
112    80     
160    112    
-208   0      
80     -32    
-32    -16    
-16    96     
96     80     
-32    16     
48     96     
112    48     
64     144    
-112   48     
112    80     
32     48     
16     32     
0      176    
-48    80     
-80    -80    
112    -80    
-32    256    
208    -112   
16     32     
112    -2368  
128    128    
-128   -32    
64     32     
0      -64    
-112   224    
368    -144   
-144   48     
128    -16    
-16    112    
32     192    
224    112    
0      32     
240    -144   
-112   64     
112    -608   
-48    -176   
112    96     
224    192    
-128   64     
96     112    
-32    -16    
96     192    
64     64     
112    176    
-144   272    
64     -32    
-144   160    
80     -64    
-16    128    
80     -96    
-96    80     
192    -240   
144    128    
-80    -64    
16     80     
-16    80     
32     64     
-64    -48    
16     0      
64     64     
48     -144   
-336   -128   
448    -176   
368    560    
-416   -176   
48     144    
112    -464   
80     96     
16     -384   
-80    64     
0      -16    
80     -80    
288    128    
-352   -192   
32     96     
96     -80    
-80    96     
336    -128   
-64    208    
16     -432   
-32    128    
128    -704   
64     48     
-32    96     
-112   192    
224    -32    
80     160    
128    80     
-192   -688   
224    80     
64     -352   
112    112    
208    256    
-368   288    
80     -208   
-112   32     
192    96     
112    128    
-128   -32    
272    160    
32     -16    
128    160    
48     32     
288    128    
-192   320    
240    -32    
-128   96     
176    -192   
-64    160    
96     -32    
160    112    
64     -80    
0      64     
16     48     
80     160    
0      0      
16     -272   
144    -64    
64     0      
128    -736   
64     -48    
112    -1184  
32     0      
336    144    
-384   -224   
224    96     
-256   -112   
80     -512   
96     -48    
48     16     
-48    336    
-112   160    
80     -256   
16     0      
336    -320   
-576   -464   
256    -848   
160    -64    
304    -496   
48     -16    
96     96     
32     -144   
32     -224   
64     -160   
192    176    
64     176    
-224   -48    
80     -256   
-352   -112   
64     0      
80     144    
-64    -112   
208    -96    
-192   176    
352    112    
-304   -1456  
48     -32    
48     -16    
-16    32     
0      -192   
-32    112    
-336   -192   
240    304    
32     80     
32     464    
0      0      
192    -304   
112    -96    
-16    -320   
-112   -96    
176    -304   
-64    0      
-112   -32    
144    64     
-64    -96    
112    -80    
16     144    
32     176    
-48    -192   
32     -208   
-528   288    
-272   -256   
544    -672   
-256   -80    
304    96     
-16    -240   
-32    16     
32     -96    
64     128    
-96    -192   
32     -416   
128    272    
-64    160    
-160   -288   
144    -176   
-160   224    
208    224    
-80    -32    
368    176    
-224   112    
-64    -928   
128    96     
-48    -1040  
32     144    
-16    112    
80     -48    
-16    112    
336    304    
-464   256    
144    -48    
-192   0      
192    64     
96     384    
-160   432    
96     16     
64     -96    
96     96     
-80    48     
256    128    
-32    0      
160    -64    
-480   -16    
176    16     
-64    48     
0      -16    
-96    48     
48     -16    
-176   0      
-48    -496   
-16    -240   
32     -256   
320    -16    
-160   -528   
128    0      
-400   0      
96     16     
64     80     
80     -80    
208    288    
-32    96     
-224   -16    
-96    -240   
224    544    
-96    80     
0      -160   
208    -240   
80     0      
-304   32     
64     16     
-48    32     
128    32     
-16    144    
16     0      
80     -272   
96     0      
0      -16    
-80    32     
144    48     
-704   0      
192    224    
-1296  80     
-192   -240   
16     -1040  
128    -480   
192    -192   
-352   16     
0      96     
-208   48     
32     64     
96     128    
-112   64     
-48    96     
80     304    
-128   -128   
0      48     
-16    -208   
-112   0      
0      64     
-80    64     
-128   -128   
-80    -576   
32     448    
-256   560    
-384   -1120  
352    -256   
48     496    
-464   -560   
240    176    
-64    -16    
-256   -512   
192    0      
96     816    
0      -112   
-16    48     
144    80     
-304   -128   
-144   -224   
-96    -32    
-16    80     
-256   -48    
-208   -160   
-368   -480   
64     -224   
-16    -464   
128    48     
-32    256    
80     400    
144    640    
-160   384    
-32    80     
-144   -192   
48     128    
160    192    
-464   -32    
-48    64     
-288   -16    
0      -144   
32     32     
80     96     
-96    -144   
272    176    
16     -272   
-320   -144   
192    48     
-176   80     
-64    -64    
-176   64     
64     -16    
-112   112    
-544   -16    
416    432    
-1792  -16    
272    32     
-480   -112   
256    64     
-160   48     
-16    32     
16     96     
240    64     
-592   -48    
400    0      
-432   208    
288    176    
-336   80     
112    0      
208    224    
-384   -80    
32     160    
272    -80    
-448   32     
208    -48    
-128   192    
288    64     
-400   -32    
144    48     
16     32     
-48    64     
-208   -160   
240    -80    
-304   -16    
32     48     
-624   -128   
144    -128   
-256   96     
336    176    
-112   48     
304    224    
-224   160    
-96    64     
-16    -48    
176    112    
48     64     
-80    144    
-48    16     
-240   -128   
128    64     
-112   -16    
112    96     
-16    48     
-32    32     
160    96     
0      112    
112    64     
64     160    
-32    64     
-32    32     
112    -32    
-208   -32    
96     -32    
-48    16     
-48    64     
-32    64     
-80    16     
-48    144    
-48    16     
-16    48     
80     96     
48     144    
-80    0      
0      0      
0      16     
-48    32     
-64    64     
256    160    
-384   48     
80     112    
-160   64     
-112   -32    
0      0      
0      64     
32     -64    
176    32     
-48    96     
80     0      
0      128    
96     0      
-16    96     
-16    96     
-32    160    
-128   -304   
-96    0      
144    144    
-240   112    
208    64     
64     80     
-240   -256   
160    -224   
-16    -80    
-64    96     
224    96     
-80    48     
192    192    
-32    32     
48     48     
16     -64    
64     64     
64     176    
64     48     
48     208    
-112   -176   
16     96     
-16    -144   
-96    96     
96     96     
32     48     
0      64     
-128   -272   
-32    -48    
160    112    
-224   -48    
0      -32    
112    32     
48     128    
80     48     
80     96     
-32    64     
80     112    
96     16     
112    32     
464    464    
-432   128    
208    128    
-176   64     
224    80     
-80    -112   
-224   -832   
240    64     
-64    32     
208    32     
32     16     
112    64     
48     128    
32     80     
144    32     
-192   96     
-144   112    
240    160    
-64    16     
272    96     
-304   16     
192    -752   
48     80     
48     96     
32     144    
32     128    
64     32     
144    -32    
-64    80     
-112   -80    
64     -80    
176    176    
-32    112    
-16    48     
-16    96     
-32    0      
96     -400   
32     96     
-48    192    
-80    96     
48     48     
-64    64     
-16    -112   
176    304    
-160   -272   
96     80     
0      336    
-32    288    
-192   176    
-208   -368   
0      -208   
192    -288   
-48    112    
112    -1488  
32     112    
144    176    
-16    112    
16     192    
128    144    
-112   112    
16     144    
96     640    
-192   752    
144    96     
-16    -80    
256    128    
-160   96     
32     32     
96     0      
-192   544    
32     -48    
96     160    
-128   48     
-80    96     
-80    -16    
304    32     
-32    96     
-48    -144   
-256   -464   
48     -128   
144    -32    
-144   -192   
32     96     
64     -432   
336    208    
-240   -608   
240    64     
16     304    
144    224    
-96    256    
240    144    
-176   32     
176    80     
-144   -128   
96     -208   
144    592    
-80    -400   
-48    -656   
128    -16    
256    336    
-320   -832   
432    80     
-144   -432   
160    -16    
128    64     
224    192    
-48    448    
-176   -192   
0      -112   
96     -80    
64     -32    
144    -32    
32     272    
-48    -272   
-64    -32    
-16    48     
256    96     
-112   32     
80     16     
208    96     
-32    96     
32     -48    
112    -400   
0      48     
144    16     
-32    240    
256    -176   
-80    64     
-112   -528   
16     -32    
240    160    
272    368    
-192   176    
128    -320   
-112   -144   
-192   -1504  
208    -1184  
-144   -288   
528    -304   
304    768    
128    784    
-64    -304   
80     288    
272    352    
0      480    
80     -144   
-112   -496   
64     -160   
16     -336   
-64    -464   
80     -784   
80     -112   
-16    -128   
144    -112   
224    -16    
-224   -976   
224    -48    
-32    96     
112    -32    
-32    128    
64     -32    
48     -192   
-32    64     
64     -176   
-96    -16    
80     64     
-192   0      
240    -320   
32     96     
-48    -176   
48     -512   
64     -160   
64     -496   
80     -192   
160    336    
160    368    
-80    208    
-128   240    
48     -256   
0      416    
-64    80     
-144   -48    
-256   -32    
16     -48    
64     16     
-32    -224   
32     -96    
-48    -304   
160    -80    
256    576    
-32    560    
16     272    
-128   -160   
112    -160   
0      -160   
-80    -192   
160    -16    
64     720    
-64    800    
288    -48    
192    -560   
-32    80     
-16    -160   
-48    -160   
48     -1008  
224    272    
-176   80     
96     16     
-176   -192   
368    -272   
-80    368    
0      -32    
-144   -16    
144    -48    
-512   96     
0      -176   
-96    -208   
0      -208   
112    176    
-48    -320   
112    -656   
80     -448   
0      -48    
-176   -144   
256    160    
-48    112    
-16    -16    
-176   -48    
192    -160   
-192   -96    
48     -64    
-800   96     
0      -48    
-96    80     
-32    -176   
112    112    
32     -208   
-96    -176   
368    -80    
-240   144    
96     -224   
48     -272   
80     -112   
64     -112   
-48    96     
64     64     
-208   160    
48     -64    
-160   -32    
80     -448   
-48    112    
256    -448   
-112   0      
80     80     
48     -64    
-192   -16    
64     -48    
-112   -64    
384    544    
-448   304    
48     -224   
-336   -192   
112    -464   
160    -80    
-48    -80    
-32    128    
128    -240   
176    80     
0      96     
-16    -32    
-96    -80    
96     0      
-128   32     
16     -16    
-144   224    
432    224    
-432   160    
112    16     
176    -64    
-112   0      
128    96     
-144   176    
256    -160   
-352   -64    
128    64     
-192   16     
48     16     
-320   208    
16     -32    
-448   48     
288    224    
-352   176    
-192   -48    
-48    144    
-64    -32    
-144   64     
-192   -128   
-80    -32    
-48    -80    
-448   -80    
-400   16     
-1184  -32    
-320   80     
496    96     
-304   0      
208    -80    
-112   -160   
-272   -432   
144    32     
-352   -192   
-96    112    
-160   16     
64     48     
96     48     
-368   16     
32     48     
-512   -32    
-208   -96    
192    64     
-144   64     
-288   -160   
-32    128    
48     -32    
-208   160    
-80    96     
112    32     
-128   -48    
-16    -32    
16     32     
-128   -32    
64     112    
-112   -112   
-64    64     
-336   -128   
48     16     
160    208    
96     64     
96     288    
-176   272    
128    -96    
-128   112    
80     16     
-96    -16    
32     80     
-112   80     
128    64     
32     48     
-240   -160   
-144   -144   
96     -32    
16     -16    
0      224    
-16    64     
112    160    
-160   48     
80     96     
16     288    
-64    16     
-80    -128   
128    32     
80     128    
-80    -48    
-128   192    
288    144    
-240   144    
-96    112    
0      32     
-336   -64    
80     48     
-160   64     
64     0      
96     144    
0      128    
0      64     
-80    -64    
80     0      
-64    64     
0      112    
64     48     
112    112    
-848   -32    
-64    64     
48     -48    
-160   -32    
32     64     
-16    64     
-32    112    
-96    48     
-16    16     
-96    32     
48     32     
-64    -16    
16     32     
-96    -48    
48     64     
-240   -64    
0      112    
32     224    
80     160    
-96    128    
0      48     
-112   64     
80     96     
-80    112
[truncated: 122,011 more chars]
