# Supplementary material for: A Fault Diagnosis Method for One‐Dimensional Vibration Signal Based on Multiresolution tlsDMD and Approximate Entropy
Source: Hindawi journal article supplement (doi:10.1155/2019/3262818), 2019-01-01
Supplement: f1 [file 3262818.f1.zip › 3262818.f1/gear signals/wear gear signal/Data9.txt]

336    -304   
0      -144   
64     -80    
-48    112    
416    288    
224    -448   
-160   -400   
48     -160   
240    112    
48     128    
160    0      
144    16     
-80    32     
48     -576   
160    0      
144    -192   
16     224    
-1376  16     
-64    -16    
256    -96    
128    160    
-192   -752   
-176   -688   
240    -176   
-224   -16    
-16    -64    
-16    -416   
16     -144   
80     -336   
192    16     
-224   -112   
80     -48    
-1136  -176   
32     96     
192    400    
-64    -160   
80     -48    
-64    -720   
128    0      
64     -1984  
-128   -16    
208    16     
-48    144    
64     128    
-96    -176   
-320   -272   
192    -32    
-240   -144   
-48    -320   
192    1008   
64     -384   
-64    -304   
-48    -192   
0      -144   
32     -624   
176    -16    
-96    -384   
160    400    
-336   -624   
288    -464   
-64    160    
-48    160    
-16    -208   
-32    -16    
-448   304    
0      64     
384    176    
-48    480    
-112   112    
304    -320   
-64    240    
32     0      
16     48     
64     -96    
128    -48    
48     320    
-80    176    
0      0      
64     -32    
-128   -80    
224    192    
-432   416    
-16    80     
48     32     
240    16     
-64    32     
128    -1328  
64     80     
32     -16    
-96    -16    
16     80     
80     0      
-272   -32    
80     -96    
-736   -16    
80     -16    
-64    -160   
-224   -240   
0      -208   
400    -208   
-288   240    
-16    -416   
32     -48    
-48    -48    
176    0      
-272   -96    
240    400    
-256   224    
0      48     
-208   -64    
176    576    
-352   272    
-96    -320   
176    0      
112    -192   
-224   112    
176    -64    
96     -16    
-256   0      
96     96     
-64    16     
192    -272   
0      32     
160    -16    
-192   48     
160    -160   
-448   64     
320    64     
-128   448    
-64    -544   
80     -992   
-528   -672   
224    -240   
48     48     
48     48     
16     112    
128    96     
-32    128    
-64    -32    
-64    336    
160    272    
-240   -80    
-864   -160   
32     64     
-80    -112   
16     80     
0      48     
-16    -144   
112    -160   
-256   624    
-144   -176   
-752   -944   
80     624    
16     -208   
32     -352   
48     416    
96     -208   
-416   -336   
320    512    
-352   544    
192    -48    
-112   -176   
176    144    
-224   -304   
-48    -64    
0      32     
-832   32     
-32    80     
-544   192    
-192   -272   
112    -144   
64     -304   
-32    -272   
-32    96     
80     368    
224    496    
-208   224    
48     -64    
-208   -240   
-96    -48    
-192   -448   
-432   -320   
208    176    
-896   144    
-80    96     
-256   -240   
224    176    
-432   -464   
496    176    
-368   -352   
-32    -112   
112    64     
-112   64     
-80    -96    
-144   64     
240    64     
-80    96     
32     0      
0      -16    
-496   240    
-720   -208   
-384   64     
160    -16    
-64    112    
-80    48     
-96    48     
-32    -96    
-384   112    
304    -128   
-272   -32    
128    48     
-128   -48    
0      32     
16     112    
-192   64     
-464   16     
96     16     
-192   16     
32     -160   
64     80     
144    192    
-256   64     
-96    64     
64     64     
-112   80     
-224   -48    
-176   -208   
-16    80     
-80    48     
208    272    
-528   -64    
0      112    
144    48     
-48    32     
-16    32     
-128   128    
-48    128    
-160   48     
176    128    
80     48     
-64    112    
-48    48     
-48    48     
-48    0      
144    128    
-288   -64    
48     80     
-736   -192   
-96    -144   
240    32     
80     128    
240    112    
-160   32     
192    208    
-256   80     
16     192    
208    160    
-80    160    
-256   -48    
80     96     
-272   -176   
48     128    
176    176    
-144   32     
96     80     
-208   -64    
32     144    
-48    16     
64     48     
-128   16     
80     48     
64     -16    
-80    64     
-176   -64    
16     112    
-224   -64    
16     -32    
48     144    
32     224    
176    0      
-64    48     
112    80     
80     64     
80     80     
96     96     
-48    -16    
-224   32     
-144   -288   
64     -128   
-16    32     
-16    112    
96     0      
-48    -48    
128    304    
400    336    
-448   80     
256    224    
80     -16    
-256   -16    
0      16     
96     96     
-160   -112   
16     16     
64     32     
80     0      
-320   -80    
160    -96    
-128   0      
128    0      
64     192    
128    48     
0      48     
48     -48    
96     80     
-16    368    
48     128    
-48    0      
80     128    
-64    144    
-160   96     
16     112    
64     64     
-16    32     
48     80     
96     48     
64     112    
-64    64     
-80    -352   
176    64     
-16    48     
-192   112    
144    64     
-80    80     
96     96     
-32    144    
96     128    
128    96     
128    128    
-64    16     
-32    96     
96     64     
-144   48     
80     -48    
224    96     
-144   64     
336    160    
-304   -80    
112    240    
-144   -32    
-16    -224   
160    96     
-16    -64    
-48    112    
112    224    
-272   112    
32     48     
224    224    
224    240    
-160   112    
-160   -80    
224    32     
-48    -272   
112    160    
48     80     
0      -80    
0      16     
224    128    
-80    32     
192    64     
-176   128    
64     336    
0      480    
32     -48    
48     -64    
-64    -32    
96     16     
176    160    
32     368    
-112   48     
96     -192   
64     64     
80     16     
-48    16     
16     128    
96     16     
16     0      
-16    0      
-96    -320   
-432   -720   
192    -336   
64     240    
-80    64     
-336   -192   
64     -48    
32     -112   
-96    -352   
224    -528   
208    -16    
-80    -368   
-64    -96    
128    -32    
64     80     
-128   208    
0      128    
-112   656    
432    576    
-96    208    
-240   -112   
112    48     
32     -64    
48     64     
-224   -384   
352    256    
-208   -1104  
160    96     
-16    -112   
304    -96    
-224   128    
208    208    
-144   112    
192    128    
-208   -352   
272    160    
-16    576    
-16    -576   
272    -432   
-64    336    
-16    -16    
-128   -320   
224    288    
-192   0      
96     112    
48     64     
-80    432    
-64    -224   
432    32     
32     240    
-192   128    
208    48     
0      -16    
96     -64    
224    -528   
64     208    
-16    0      
240    16     
64     -1424  
-256   96     
128    32     
0      96     
-80    -16    
176    80     
112    240    
-112   -496   
-112   160    
-64    -368   
64     -560   
192    64     
176    464    
32     320    
128    -16    
-48    -288   
-32    48     
-320   -672   
16     -320   
304    80     
0      32     
48     640    
-192   -176   
96     -208   
80     -112   
240    352    
64     48     
80     320    
16     -208   
-64    32     
0      -80    
48     -432   
160    64     
-128   -928   
192    -256   
-304   -32    
336    -416   
-16    -80    
32     -48    
32     -80    
96     128    
80     -240   
48     128    
0      -80    
80     112    
48     64     
-96    -224   
128    80     
64     -160   
-48    -160   
112    -352   
32     -480   
128    0      
0      -48    
96     -144   
160    -336   
0      32     
208    144    
0      32     
-192   -224   
432    192    
-176   -192   
96     80     
-272   -32    
16     -112   
-400   -80    
48     -160   
192    64     
48     -176   
112    288    
208    -160   
64     144    
-144   320    
-16    -416   
288    -176   
-96    32     
176    -64    
-48    336    
80     1184   
288    480    
-864   -784   
80     -736   
128    224    
96     -192   
-32    0      
224    -144   
-64    112    
128    -496   
48     -320   
128    -272   
-64    -512   
-32    528    
80     16     
-80    -64    
176    32     
-320   112    
224    48     
-1744  -144   
80     -112   
176    128    
-16    16     
-240   -1008  
208    -704   
160    -64    
48     -128   
-80    128    
128    144    
-16    96     
-256   -16    
16     -400   
48     80     
-80    -144   
128    16     
96     -144   
-16    128    
80     -176   
-16    80     
192    -320   
0      128    
-192   -880   
464    16     
-128   288    
-64    -160   
-320   -208   
240    -112   
-128   -48    
32     -112   
-32    -192   
96     -160   
-208   192    
16     -16    
32     -128   
0      -32    
80     80     
-160   -1360  
48     16     
-80    0      
32     -32    
-96    32     
-16    -96    
112    -144   
-16    -48    
16     0      
0      80     
-144   -112   
160    -64    
144    80     
-80    -144   
-192   16     
0      -112   
128    32     
-304   160    
-16    176    
-16    0      
-16    0      
112    -32    
-144   -208   
32     -336   
80     -48    
-96    -48    
0      -32    
16     -16    
160    -384   
-80    32     
112    -144   
-32    -16    
16     -80    
-144   -256   
352    80     
224    352    
-432   512    
96     320    
224    192    
-64    -144   
112    -64    
32     -480   
-96    -112   
-688   -224   
96     128    
-96    48     
-752   48     
-16    -208   
-96    -48    
128    -128   
64     48     
-32    -80    
-192   128    
96     128    
64     96     
-64    176    
-592   -16    
-96    -48    
160    -80    
0      96     
176    128    
-496   -112   
48     64     
-304   16     
16     48     
-656   -16    
-32    0      
-32    -64    
80     0      
16     -128   
48     16     
-160   -96    
176    112    
-144   -256   
-160   -208   
32     32     
-48    0      
48     16     
-80    48     
-112   -48    
-240   32     
-64    80     
-688   -272   
-288   -48    
352    32     
-144   -128   
-288   -32    
304    80     
-256   -240   
-96    80     
96     80     
96     32     
-144   176    
-64    -112   
16     -32    
48     272    
-144   192    
-256   48     
-16    -128   
-272   -144   
48     96     
-208   -48    
48     112    
-112   -192   
-96    -144   
256    160    
-112   32     
-144   0      
-16    -48    
-80    -272   
48     16     
-112   96     
-288   -32    
224    16     
-784   -176   
64     112    
128    -64    
32     64     
32     32     
-112   0      
80     48     
0      64     
-96    32     
-144   -96    
0      -80    
-64    32     
-160   -32    
-336   -112   
112    -16    
-784   -48    
160    160    
-96    -16    
-32    64     
32     -32    
112    16     
64     32     
32     80     
80     0      
96     112    
-144   48     
48     64     
80     32     
-176   -32    
-64    -48    
-176   -192   
112    48     
-176   -144   
-144   0      
0      -48    
-64    32     
112    80     
-32    96     
208    80     
-256   48     
128    32     
-112   -176   
-48    32     
0      112    
160    -80    
-368   -64    
112    224    
-208   240    
64     240    
96     176    
48     96     
-16    -32    
0      48     
-96    -64    
-48    -48    
128    288    
-96    272    
224    64     
-96    352    
336    432    
-400   -176   
112    176    
-80    0      
-80    -80    
80     80     
-64    -80    
0      0      
-16    0      
160    192    
-192   128    
448    592    
-480   64     
16     -352   
0      0      
-80    432    
112    -576   
-16    -16    
400    288    
-112   240    
240    160    
-16    -112   
0      96     
80     64     
-32    48     
-16    -128   
80     160    
-80    256    
144    -64    
-128   32     
128    64     
-224   -48    
96     -48    
-224   -192   
16     -112   
-384   -192   
48     496    
32     192    
-448   -512   
32     -240   
-304   256    
240    112    
-368   -192   
240    240    
-128   -64    
96     80     
-64    -48    
-224   128    
304    224    
-240   -16    
256    592    
-64    48     
-112   -16    
256    224    
0      16     
272    112    
-400   -544   
96     96     
-128   16     
-32    -32    
416    272    
-288   -336   
448    80     
-256   -16    
128    80     
256    48     
-32    0      
272    -192   
624    480    
-656   -576   
320    -464   
32     912    
64     -208   
96     -144   
16     240    
48     -1568  
-144   176    
272    -704   
-160   384    
176    48     
-48    -368   
112    112    
-80    736    
240    -416   
-144   96     
16     48     
128    80     
-16    64     
-128   -128   
224    -32    
32     -400   
-32    144    
192    32     
-64    -32    
96     -128   
336    512    
-80    336    
-48    32     
-112   -512   
112    -400   
256    496    
-144   272    
-144   -288   
224    -96    
-128   112    
-64    -208   
176    -192   
0      384    
208    128    
-272   -912   
240    464    
64     224    
0      240    
96     80     
-160   -160   
208    -96    
32     288    
-192   272    
16     -592   
-288   -1200  
192    -880   
-16    128    
64     -288   
-48    480    
336    32     
-80    64     
-208   48     
128    48     
-32    -64    
-16    112    
0      0      
48     48     
0      16     
-16    -224   
32     48     
-96    -320   
288    -224   
-160   -432   
192    432    
-208   32     
32     -112   
0      -16    
96     192    
32     256    
-48    240    
32     80     
208    -144   
-80    96     
128    -32    
256    64     
32     -32    
16     80     
112    -48    
144    160    
-16    -240   
48     -288   
64     -144   
48     48     
128    96     
-80    144    
160    720    
-80    16     
32     32     
128    -272   
-144   -384   
160    -208   
-64    496    
-96    -16    
144    160    
-16    48     
208    256    
-176   192    
112    48     
-160   -48    
32     80     
-48    144    
-48    -176   
304    112    
-208   304    
256    224    
48     0      
48     -48    
48     -208   
32     16     
16     -112   
0      32     
368    144    
-80    32     
0      64     
208    144    
-112   256    
48     -32    
-48    160    
48     -384   
16     112    
-64    -112   
64     32     
-112   -64    
256    -112   
208    -48    
-96    224    
128    0      
-80    64     
208    80     
32     112    
16     -16    
-128   -288   
80     0      
160    80     
-320   48     
256    -144   
-112   160    
272    -96    
16     64     
-16    -560   
144    -48    
-32    80     
-48    -752   
-16    -48    
0      -208   
0      -304   
128    -80    
-48    -1280  
64     -80    
48     -336   
32     -16    
112    320    
-112   -48    
-288   -320   
496    -496   
-144   -400   
272    32     
160    112    
128    272    
-144   112    
128    -528   
-112   -176   
16     -160   
192    240    
80     80     
-192   -144   
-144   -3312  
64     16     
64     16     
80     112    
256    16     
64     48     
176    -48    
112    -32    
-336   -144   
-128   -176   
-432   80     
64     -96    
48     -192   
64     -160   
-192   -128   
288    -496   
-80    -112   
-112   -464   
112    -160   
-16    -400   
112    112    
-96    -80    
176    -32    
48     64     
96     48     
-816   -96    
96     -64    
48     64     
80     -240   
-16    -64    
160    -48    
64     0      
-112   -1168  
160    144    
16     -208   
-64    0      
-32    -208   
576    64     
-272   48     
128    -112   
0      -48    
176    -16    
-784   80     
-80    16     
80     -48    
96     -80    
192    160    
0      -768   
16     -16    
48     48     
80     32     
-16    64     
-176   -192   
-64    -224   
128    -256   
-96    -112   
48     -48    
-272   16     
208    -80    
-496   0      
112    -96    
-96    -80    
-16    -352   
32     -160   
144    272    
-48    64     
-432   -544   
0      64     
64     32     
-112   -16    
-128   -16    
-64    64     
-560   -96    
16     32     
-480   -16    
96     -80    
-80    -32    
32     -320   
176    48     
112    -1088  
160    -224   
-64    64     
64     32     
48     144    
-96    -48    
64     320    
16     64     
-304   -80    
112    -176   
-144   64     
224    -96    
-240   -160   
288    -176   
-96    192    
-32    -464   
112    -176   
-64    112    
80     176    
-272   64     
96     32     
-256   -192   
64     -112   
-96    -288   
0      -160   
-864   16     
80     -80    
-80    96     
256    -96    
-96    208    
-32    608    
32     464    
-128   304    
160    176    
-272   16     
-16    -288   
-64    -176   
48     -48    
0      128    
80     128    
-256   -32    
-576   -176   
64     256    
-480   16     
-112   -64    
-192   64     
-352   224    
64     496    
-352   304    
-192   16     
96     -144   
-176   0      
208    32     
-112   144    
-32    -144   
16     -304   
48     -112   
-48    288    
-16    224    
-48    -352   
-240   224    
-80    16     
-208   48     
-80    64     
-160   -112   
-64    -352   
16     496    
64     -384   
64     336    
-272   -112   
16     64     
-128   -48    
80     -32    
-320   -368   
64     -208   
-128   0      
-32    -64    
16     128    
80     -96    
-96    -16    
-32    272    
96     64     
-416   240    
32     144    
-208   -16    
48     48     
-48    -560   
64     -192   
128    272    
-192   80     
80     -64    
0      144    
16     -112   
-304   -240   
80     464    
-480   -224   
-16    -112   
192    96     
-64    48     
64     -80    
32     208    
288    304    
-32    336    
-160   -32    
-352   -256   
96     32     
-16    32     
-448   -240   
176    64     
-336   176    
-128   -224   
128    464    
-400   -208   
-96    384    
-656   -864   
176    -288   
224    624    
-16    -80    
-16    0      
48     496    
-224   -112   
-64    96     
-96    -256   
-80    -96    
128    96     
-96    96     
-112   752    
192    -496   
-16    400    
-320   -288   
16     64     
192    208    
16     128    
-240   16     
-256   -208   
256    64     
-256   224    
272    -176   
64     256    
-208   -240   
64     384    
-48    720    
-800   -1456  
112    -592   
32     608    
-48    800    
256    -16    
-272   -384   
128    16     
128    416    
-112   -304   
288    48     
-336   -304   
336    448    
-544   -800   
304    80     
-464   -1008  
-16    688    
112    32     
-400   -32    
80     -112   
256    752    
-176   128    
144    -336   
384    -80    
-352   -128   
112    208    
16     -16    
-112   64     
64     -80    
-64    80     
0      -288   
176    160    
0      416    
-176   -192   
-224   96     
160    128    
-48    -336   
-16    320    
48     -336   
-336   -304   
32     32     
32     160    
48     176    
-48    160    
-48    -336   
32     256    
-64    32     
0      144    
-64    -32    
64     96     
96     224    
-480   -848   
192    -80    
-80    368    
0      -384   
112    112    
48     112    
-32    -240   
240    -32    
-176   -256   
272    144    
-112   -32    
-32    64     
192    96     
0      80     
48     64     
0      64     
32     32     
32     48     
0      480    
-16    400    
128    480    
-16    176    
128    176    
-96    272    
288    240    
-176   64     
160    16     
-128   -160   
32     -112   
128    -48    
64     32     
112    112    
-288   -592   
192    -256   
304    112    
-176   112    
-96    -80    
144    96     
48     160    
0      160    
-48    80     
0      32     
-160   16     
64     32     
48     -16    
64     128    
-96    -176   
-16    -32    
208    128    
-256   16     
96     32     
-16    -16    
96     80     
-16    192    
96     80     
-208   -224   
176    -688   
-176   0      
112    16     
-16    -16    
416    32     
-272   112    
448    0      
-192   64     
-48    0      
112    80     
80     0      
-32    -16    
-64    -144   
16     112    
-208   -144   
32     -704   
-48    32     
-96    112    
-16    48     
32     64     
32     -64    
-96    0      
32     112    
112    80     
-112   32     
-32    -240   
368    256    
-304   -48    
32     -224   
272    176    
0      -576   
-16    16     
-48    128    
160    -16    
0      -96    
96     64     
96     -64    
48     -144   
208    -32    
224    80     
0      -32    
144    112    
176    -32    
-224   368    
160    32     
16     -576   
-16    96     
-272   -192   
-32    -176   
192    128    
-80    240    
64     160    
-144   -16    
80     -64    
112    -64    
0      48     
16     -80    
-304   -224   
224    -144   
-80    -336   
32     -352   
144    112    
-80    -80    
-16    128    
-32    -32    
-16    -64    
176    -208   
-96    -48    
-112   224    
80     288    
-192   192    
-96    80     
-320   176    
96     448    
-384   608    
-64    48     
48     96     
-480   96     
128    112    
-32    -384   
64     112    
32     -48    
192    224    
-176   -80    
32     96     
-48    -32    
-64    -208   
192    176    
-48    -112   
64     0      
0      -144   
272    320    
-240   -256   
-48    224    
32     -144   
-64    -16    
416    16     
-32    160    
-64    144    
112    144    
128    -32    
288    -176   
-192   208    
128    48     
-112   64     
-96    -400   
224    64     
0      -48    
-16    48     
-48    -32    
80     16     
80     64     
64     112    
-112   96     
176    80     
-32    192    
-96    0      
-16    144    
-64    -288   
80     16     
64     -288   
96     48     
-48    -240   
64     112    
112    64     
-32    96     
-96    32     
80     -64    
144    48     
96     80     
16     -272   
0      -224   
-48    -1104  
112    -32    
-224   -208   
144    -96    
64     144    
32     64     
48     80     
80     -128   
256    -1984  
48     272    
-96    -96    
-144   32     
-176   -144   
16     -480   
16     -464   
-64    -1296  
-208   -624   
528    -528   
-48    320    
32     -144   
160    96     
-16    80     
48     0      
48     -64    
-48    64     
80     32     
0      96     
-288   -96    
-128   -832   
-96    -736   
-96    -640   
-144   -784   
160    288    
208    -64    
-160   -2704  
192    -272   
-112   16     
16     -96    
64     -64    
-64    96     
64     96     
96     16     
0      -80    
-112   -96    
-560   336    
112    -336   
-32    352    
192    -64    
0      64     
80     -576   
-128   -64    
0      -256   
112    608    
48     -352   
-48    64     
48     48     
-48    -336   
16     96     
-16    -112   
16     240    
-272   -464   
-208   -688   
48     -672   
256    800    
176    864    
-96    224    
64     -1984  
80     -16    
-16    32     
32     96     
-64    64     
96     80     
-128   256    
16     -192   
-368   -224   
-80    -112   
-1520  -48    
0      -48    
-16    0      
128    -96    
-80    208    
112    -544   
-144   80     
128    144    
144    112    
-176   16     
80     16     
240    432    
-128   320    
-80    112    
192    -80    
-240   848    
368    -368   
-800   -1200  
240    -864   
-224   -288   
176    -256   
192    304    
128    112    
0      176    
240    240    
224    336    
-304   128    
-112   -320   
-80    0      
480    -64    
-112   -16    
16     -304   
-352   112    
528    -320   
-208   64     
720    528    
-336   736    
-240   -1152  
96     -464   
-176   -64    
224    128    
-224   -160   
208    -128   
32     -112   
48     -64    
208    528    
-64    -112   
-112   -176   
96     -336   
-16    144    
-128   -448   
-48    -368   
16     384    
0      112    
-80    160    
32     64     
-288   -304   
320    -272   
-208   144    
224    -256   
-80    160    
64     -80    
-48    -336   
160    -160   
176    528    
-192   -336   
304    496    
-176   592    
-800   -48    
-64    -64    
352    -80    
-336   176    
-112   -560   
0      32     
-48    32     
240    -48    
-560   416    
-80    -448   
-32    -128   
-96    288    
48     -16    
-336   32     
-16    -144   
-112   -160   
176    640    
-544   0      
-128   -672   
224    176    
-16    272    
-16    -112   
-112   32     
112    96     
-336   0      
-400   -384   
80     -64    
304    144    
-288   192    
32     96     
-160   -128   
-128   -272   
144    144    
-304   -160   
112    -320   
80     16     
320    -176   
-256   -96    
-32    -160   
-32    -32    
64     32     
-32    176    
-48    560    
128    576    
-240   464    
-176   16     
96     224    
-32    128    
-16    -160   
-496   -144   
-32    208    
208    80     
-144   -32    
-48    -48    
48     -336   
272    368    
-64    272    
32     128    
-384   -64    
176    160    
80     112    
-48    16     
-64    32     
-144   80     
-96    32     
-112   32     
224    560    
-16    720    
-192   240    
64     176    
-96    -112   
80     0      
16     -16    
80     64     
-16    -32    
-112   -144   
240    144    
-272   80     
32     64     
-64    64     
32     32     
-112   -336   
0      -128   
336    -48    
-80    144    
-32    0      
-128   -160   
0      -208   
176    80     
-144   64     
-272   -48    
128    176    
16     -16    
-192   -160   
80     -288   
256    160    
-368   -176   
256    160    
-624   80     
-224   64     
176    144    
-32    144    
-80    32     
-16    -16    
32     -32    
16     80     
-160   0      
-64    64     
-32    48     
-192   16     
16     -16    
-224   -112   
48     48     
-336   0      
-16    -48    
80     0      
-96    48     
32     208    
48     64     
-160   64     
64     32     
-160   16     
96     16     
-176   -80    
160    -16    
80     192    
-112   32     
16     -32    
-240   32     
0      -64    
0      64     
-144   -160   
64     -144   
-160   256    
288    784    
-48    304    
-208   -448   
-48    -448   
32     -64    
-64    32     
192    -48    
-96    176    
128    -32    
-336   -112   
-48    64     
-16    96     
32     -16    
-160   128    
160    48     
0      16     
16     0      
-48    0      
0      80     
80     112    
-112   128    
176    224    
-528   -112   
208    192    
0      32     
32     32     
128    -16    
64     32     
-64    -288   
-64    -80    
112    32     
-160   32     
-112   160    
400    -16    
-112   160    
160    -32    
48     48     
-16    32     
96     64     
-16    96     
96     144    
-48    64     
320    304    
-496   32     
176    112    
48     144    
48     96     
32     80     
-32    0      
144    -32    
-32    48     
48     112    
-192   -16    
112    192    
160    64     
-48    32     
64     48     
-16    16     
-32    208    
192    96     
64     48     
384    464    
-416   -144   
0      192    
256    144    
-64    -80    
96     144    
96     176    
64     -32    
272    224    
-160   0      
-64    128    
320    128    
208    32     
32     96     
-48    -96    
64     32     
-64    32     
0      32     
112    96     
192    0      
-224   -16    
160    -48    
-64    -128   
224    96     
-16    64     
32     64     
48     96     
-96    -64    
64     96     
240    32     
-64    96     
-80    144    
-32    16     
48     64     
0      32     
-80    -512   
-80    -96    
96     -880   
48     144    
-16    128    
48     64     
32     48     
-64    144    
-96    -48    
240    -32    
80     128    
-16    96     
-144   -224   
304    240    
-16    -48    
16     -80    
160    160    
-64    -416   
16     -64    
176    32     
-32    80     
32     80     
16     64     
96     64     
160    720    
-160   32     
336    400    
80     64     
-16    -160   
80     256    
-16    -160   
176    112    
-32    112    
64     336    
224    16     
-176   -208   
256    128    
-144   720    
96     -272   
112    -32    
-176   128    
224    80     
-80    64     
288    96     
-272   80     
128    -128   
64     80     
-64    -576   
128    64     
16     0      
16     0      
224    -224   
16     -64    
-112   -48    
-160   -176   
-16    -720   
128    272    
80     336    
64     32     
48     128    
224    32     
-208   -160   
240    -80    
-64    160    
-160   -272   
240    -32    
-128   -976   
112    -96    
-32    -16    
32     -16    
80     128    
-80    16     
32     -208   
-112   0      
112    144    
48     32     
112    192    
160    -96    
48     64     
-32    -144   
-192   -368   
208    -608   
-16    320    
-64    0      
-128   -368   
-144   -112   
112    -96    
112    -272   
64     -880   
176    160    
224    16     
-96    96     
208    -304   
-16    128    
240    -96    
-48    48     
192    -16    
-192   64     
32     96     
0      112    
32     -240   
-48    128    
256    80     
-144   448    
96     304    
-224   -528   
-32    -320   
-80    -320   
112    -176   
-192   -128   
-128   -176   
96     -400   
160    128    
608    640    
-816   -592   
-208   -1024  
-368   -176   
-176   -480   
-64    -96    
64     -1424  
-16    144    
192    48     
96     384    
-128   704    
-96    96     
-304   -448   
176    -336   
80     416    
-272   -176   
32     -144   
288    496    
-704   -192   
64     -1104  
112    208    
256    912    
96     320    
-80    -528   
176    96     
-80    -64    
64     -288   
256    -432   
64     112    
-112   0      
-144   -288   
304    80     
-32    960    
-240   256    
-144   -448   
192    -32    
-16    336    
528    384    
-128   256    
64     -112   
0      -1296  
144    -400   
160    -224   
192    720    
16     384    
96     304    
96     -112   
32     16     
-64    112    
-48    224    
-352   -112   
-224   -96    
64     -80    
32     -240   
96     -160   
224    -224   
-208   224    
-176   80     
208    32     
-64    32     
320    176    
-336   -176   
112    16     
-176   16     
-16    64     
-64    -176   
96     -336   
32     -464   
224    -608   
48     -64    
32     -240   
48     -48    
-160   -1696  
80     16     
80     -80    
128    96     
-304   -160   
224    -176   
-112   0      
256    144    
-496   -32    
32     160    
-1248  -96    
-64    -96    
128    -80    
80     -112   
-32    -32    
80     -784   
320    176    
48     64     
-96    192    
368    32     
0      -32    
32     0      
128    -80    
96     160    
-128   0      
-80    112    
-48    -48    
0      48     
112    -336   
-32    128    
80     -256   
64     32     
-48    -272   
64     0      
-16    80     
-80    -32    
-448   -16    
112    -96    
-32    -32    
192    32     
48     32     
-176   -112   
112    0      
0      -240   
16     96     
144    160    
-64    128    
-32    32     
240    272    
-320   128    
-32    48     
-16    -48    
0      -16    
48     0      
0      -48    
-144   -48    
64     -96    
64     32     
-32    -176   
32     96     
112    -32    
-80    16     
-112   -48    
80     -96    
-80    64     
32     48     
-80    -32    
112    -192   
176    224    
-208   -48    
-96    16     
128    -48    
32     144    
-144   -48    
-160   -80    
-896   -528   
-880   -112   
16     0      
-288   96     
144    16     
-848   -32    
-96    0      
208    -48    
-288   -96    
256    -64    
48     112    
-496   -112   
64     80     
32     -176   
-112   -144   
-32    -384   
144    16     
-80    64     
-272   16     
-48    -32    
-400   48     
-240   -144   
0      96     
-192   -16    
144    192    
16     48     
96     0      
-32    32     
-64    -16    
96     112    
-64    112    
0      32     
32     112    
96     0      
-256   32     
-96    -48    
160    208    
-480   176    
80     112    
-592   -96    
-144   80     
48     0      
-144   80     
-48    -128   
176    -64    
64     128    
-256   -64    
-16    48     
-112   32     
64     32     
-96    48     
208    176    
-896   64     
128    112    
-1232  -16    
80     64     
-32    -96    
-48    48     
48     -16    
-112   96     
32     0      
48     32     
-16    0      
-192   32     
160    16     
-80    112    
32     0      
-256   -32    
64     -112   
-320   -48    
80     192    
-304   -32    
304    304    
-64    -16    
16     -128   
-32    160    
80     16     
-48    -16    
32     96     
-16    32     
-128   32     
64     32     
352    464    
-176   592    
-320   96     
96     32     
-160   -128   
-80    -112   
-32    -80    
48     -16    
0      80     
-160   80     
80     48     
-96    0      
0      64     
-96    -64    
96     32     
-80    48     
-48    144    
-176   -48    
-272   112    
-464   -320   
144    -720   
-144   160    
80     32     
-144   32     
-16    32     
112    208    
-80    32     
192    192    
16     16     
-128   144    
448    192    
-272   144    
-144   -16    
16     560    
-192   160    
-288   -64    
-16    -80    
128    -256   
-16    16     
-96    16     
-80    48     
-64    32     
48     48     
0      -64    
48     80     
-272   -144   
64     -48    
0      32     
304    160    
-368   16     
240    128    
-80    32     
-32    80     
-16    48     
64     240    
192    256    
-176   32     
-80    112    
-112   -64    
48     -160   
-32    -48    
-80    48     
48     272    
80     464    
128    240    
-320   -160   
-16    -176   
176    368    
-176   144    
-192   80     
96     288    
-144   16     
80     -80    
-96    32     
32     144    
0      64     
48     112    
-48    -80    
-208   192    
176    -224   
-128   64     
48     256    
-16    112    
0      48     
-176   32     
256    160    
-144   96     
160    -48    
0      16     
144    192    
-240   -160   
128    48     
-128   -80    
48     112    
0      112    
-16    16     
160    96     
-96    0      
16     64     
-96    0      
16     80     
-16    48     
32     64     
-64    16     
64     96     
-160   272    
160    160    
-16    -16    
-16    272    
144    48     
-64    16     
48     32     
0      -16    
128    16     
16     48     
16     208    
64     80     
16     16     
-48    64     
-48    48     
-176   -128   
208    -224   
16     96     
192    48     
-160   80     
32     16     
0      -48    
-80    32     
64     -64    
96     32     
128    160    
160    128    
112    48     
-16    0      
0      80     
80     -16    
128    -144   
-64    -16    
-64    -448   
-288   -656   
224    160    
-304   80     
-64    -448   
-128   -80    
16     128    
-32    -64    
-16    128    
96     48     
16     144    
64     16     
32     0      
0      -112   
160    96     
-64    -1376  
0      144    
96     64     
-192   -256   
352    -80    
80     288    
192    720    
32     208    
0      -32    
160    96     
-192   -80    
80     368    
16     288    
128    -208   
560    576    
-1040  -800   
192    -912   
176    960    
-96    256    
96     -304   
112    384    
-16    144    
-16    48     
176    144    
-96    -336   
-176   192    
160    224    
-16    144    
16     -80    
224    480    
-96    -208   
-224   -448   
272    -768   
336    368    
-144   -192   
192    64     
-176   -176   
128    -160   
-176   -192   
192    -144   
-64    -48    
112    -80    
-112   64     
160    -48    
160    352    
144    16     
-384   -384   
96     -448   
-96    16     
112    160    
-144   -336   
-144   -112   
80     96     
-16    32     
-144   0      
144    -64    
-96    -224   
384    -304   
-80    112    
272    80     
-160   -336   
160    64     
-112   -80    
640    400    
-496   -672   
336    304    
-560   -272   
128    96     
240    144    
-144   48     
-320   -288   
336    -176   
-64    64     
64     -368   
-272   -112   
592    -80    
-32    208    
112    -400   
-64    96     
192    80     
-16    64     
96     80     
16     48     
-80    -128   
144    -16    
48     -32    
-64    -256   
288    144    
-112   -80    
-16    112    
48     -176   
288    80     
80     -80    
48     128    
0      -496   
320    336    
-368   0      
128    -96    
16     0      
64     -208   
-32    128    
112    -192   
-16    64     
-48    0      
-144   -16    
224    -112   
0      96     
80     -64    
224    176    
0      80     
0      -336   
64     -128   
80     -288   
-176   208    
-1008  -128   
0      -144   
144    -16    
96     -368   
112    -176   
80     -464   
96     -96    
80     64     
16     -224   
80     96     
240    -16    
-192   -512   
-192   -32    
16     -112   
0      -32    
-64    32     
160    0      
-64    -256   
-112   -496   
272    0      
-288   -544   
144    64     
-64    64     
80     16     
96     64     
-112   64     
16     -544   
128    -16    
256    80     
-80    -96    
-304   0      
192    -304   
160    -64    
-64    -48    
-48    16     
336    -96    
-368   176    
176    -688   
-64    0      
240    -80    
-320   -112   
224    -32    
48     48     
-256   -64    
208    64     
-544   -112   
304    96     
-1152  48     
-48    32     
32     -128   
160    -304   
32     -176   
32     -1120  
-96    32     
-48    -288   
16     16     
64     -80    
176    64     
16     16     
-32    -48    
-128   48     
48     -80    
-160   -16    
64     -16    
-128   -64    
96     -48    
64     -16    
-80    -240   
32     64     
80     -1120  
240    -80    
144    -16    
-80    -128   
-48    112    
96     -112   
-64    -48    
80     -16    
-272   -64    
48     -64    
-224   0      
-208   -112   
64     176    
112    -48    
112    64     
48     -752   
192    112    
-96    -80    
0      32     
-64    -128   
256    32     
-416   48     
16     -176   
-640   -112   
16     -80    
-64    80     
-48    64     
-112   -16    
48     -176   
80     16     
176    -880   
-160   -48    
208    32     
32     48     
-48    -32    
96     0      
-192   -160   
304    -32    
-96    -112   
240    80     
-160   -64    
144    -192   
32     80     
128    -160   
-16    0      
80     32     
32     112    
96     176    
160    -48    
-208   -16    
48     0      
-32    0      
-64    16     
112    96     
-80    -128   
-32    -80    
16     -64    
192    16     
-80    -64    
80     -32    
0      -112   
-1136  -544   
-384   -512   
-448   -208   
-48    -256   
80     -112   
48     432    
96     448    
-544   -96    
320    -192   
-592   -208   
-816   -208   
-96    96     
-32    0      
-48    96     
-192   -256   
-128   -16    
-192   -48    
-80    208    
-64    240    
-64    64     
64     -80    
-336   96     
0      112    
-352   32     
224    160    
-304   0      
0      48     
-496   -304   
96     32     
0      80     
128    240    
-256   272    
-224   176    
-32    48     
-80    0      
-208   -48    
-352   32     
64     -80    
-256   -304   
-128   -432   
-112   -272   
-96    96     
0      -32    
-160   64     
-144   -16    
256    208    
-160   0      
112    48     
-240   -112   
-176   -32    
-80    -16    
-160   64     
0      -112   
-80    0      
-112   -256   
96     -224   
32     304    
16     16     
16     128    
80     48     
-80    16     
-96    16     
-64    0      
-80    16     
80     48     
-320   208    
192    -624   
48     224    
-592   768    
-240   176    
-80    -160   
80     -192   
-48    -80    
-16    -64    
-96    160    
0      144    
112    160    
-128   192    
288    240    
-464   -112   
96     -144   
-304   -128   
0      16     
-320   -48    
0      32     
16     -144   
-64    -160   
0      0      
64     576    
128    176    
-240   160    
16     224    
-176   80     
80     96     
-64    16     
0      16     
-256   -64    
-80    48     
-80    0      
128    96     
-1184  -80    
-16    0      
0      32     
-32    48     
-16    80     
-256   32     
448    -80    
-176   80     
192    336    
16     304    
-80    128    
16     -16    
-48    -32    
-48    -144   
0      96     
-320   320    
-16    0      
-16    -16    
160    128    
-16    112    
-32    80     
-16    -16    
-160   -80    
160    0      
0      16     
64     16     
-32    0      
64     160    
-240   -160   
336    432    
96     768    
48     288    
144    112    
-16    160    
-96    160    
-176   -368   
48     -304   
-48    -144   
-144   512    
368    1008   
-320   464    
128    496    
-144   400    
-96    -64    
0      -48    
144    176    
64     128    
-160   64     
208    64     
48     144    
48     1024   
-32    -32    
-80    -192   
-16    16     
-144   144    
160    64     
400    672    
-400   288    
-112   -864   
192    576    
-16    208    
64     -208   
-48    80     
-112   -48    
80     224    
64     -208   
128    -144   
208    176    
-16    512    
-176   -32    
224    -512   
-64    32     
112    144    
176    384    
-256   208    
-16    -16    
-64    -128   
16     32     
-176   16     
-128   -240   
128    -320   
-96    64     
80     -96    
-64    -80    
-160   -128   
272    64     
-64    -16    
96     -16    
16     0      
160    -128   
-64    96     
144    176    
-80    80     
-128   -192   
96     -48    
112    80     
16     208    
-352   0      
448    160    
-560   80     
160    32     
-480   -64    
-64    -80    
0      -64    
-80    160    
-16    -32    
-208   80     
272    192    
-176   96     
160    128    
-96    16     
144    160    
-96    16     
80     144    
-112   -64    
0      64     
-32    -320   
-16    -416   
144    224    
-112   256    
-160   208    
16     48     
-16    16     
96     240    
-80    32     
496    128    
-736   176    
336    -208   
-416   192    
192    -208   
-224   256    
-96    240    
16     64     
32     224    
112    96     
16     32     
-208   -16    
-16    80     
-16    192    
144    96     
-256   -32    
176    32     
-144   -48    
32     16     
96     -96    
80     80     
320    192    
-96    -288   
144    208    
-208   -704   
128    112    
32     0      
32     160    
80     80     
-48    144    
192    144    
256    192    
-320   -32    
208    112    
48     32     
32     -192   
0      80     
16     -352   
112    128    
-112   -32    
16     0      
16     -48    
48     112    
32     96     
160    16     
-176   -64    
0      64     
-48    48     
0      -48    
80     -16    
160    -80    
80     96     
320    -288   
-288   -16    
336    -128   
-288   96     
96     -256   
16     48     
0      -112   
176    16     
-48    128    
352    192    
-272   80     
64     -64    
-32    -64    
80     32     
16     288    
96     208    
-128   160    
-32    -144   
80     16     
112    -112   
-32    -368   
-160   -240   
224    176    
-336   -48    
192    32     
32     -80    
16     128    
160    112    
32     64     
-112   -192   
48     -176   
400    288    
-304   -528   
96     48     
-32    -272   
144    112    
-160   -816   
32     32     
96     80     
48     0      
-128   16     
240    176    
96     112    
32     -128   
112    96     
-48    -192   
160    112    
-48    -32    
-16    64     
144    176    
-16    0      
112    128    
80     64     
64     32     
64     80     
112    48     
64     -208   
128    96     
32     -128   
112    64     
-208   -112   
160    -32    
112    16     
128    176    
-80    -80    
80     160    
96     96     
96     224    
16     112    
0      -320   
256    -1344  
64     -208   
0      -704   
128    -48    
-48    -256   
-160   -320   
208    -80    
128    -224   
80     80     
-64    -240   
272    -1680  
0      144    
64     -80    
-128   0      
240    -224   
-64    -304   
240    256    
-240   32     
-240   64     
224    -368   
64     -32    
176    -1120  
-96    80     
272    192    
128    32     
80     48     
-96    192    
-32    -64    
-16    -128   
144    224    
-64    -208   
-128   -48    
144    -80    
176    -32    
-16    -160   
-176   -64    
224    -400   
-32    -16    
16     352    
-224   -96    
-160   -736   
-224   -432   
224    -144   
-112   -16    
-32    -32    
-16    -96    
-288   64     
96     -16    
-64    0      
352    16     
16     -80    
352    320    
-64    224    
208    -1120  
400    224    
-240   -352   
-96    -352   
-48    -336   
48     16     
176    64     
-16    0      
-368   -16    
0      0      
-1216  112    
-48    16     
48     176    
48     288    
64     384    
-32    -176   
-176   -480   
0      -400   
-48    -96    
144    64     
208    32     
-336   -48    
192    32     
80     336    
-192   96     
-304   -192   
16     -144   
-32    -176   
-96    -80    
192    272    
-304   -560   
-16    48     
96     -1504  
96     656    
64     368    
-192   -752   
80     160    
32     -192   
80     32     
64     32     
-528   -368   
256    224    
16     192    
-96    -272   
-48    -224   
400    64     
-368   -240   
432    464    
192    48     
-240   48     
96     -272   
112    -32    
192    192    
176    -32    
-96    -16    
144    -32    
-48    0      
-16    16     
144    -16    
-32    -48    
224    -304   
-64    144    
-32    -544   
224    -256   
-320   384    
576    -48    
-432   -144   
160    272    
-64    -80    
112    768    
-32    192    
32     32     
-32    384    
128    -320   
-96    -32    
144    -144   
-32    144    
32     -384   
64     48     
-64    32     
96     -64    
-160   64     
112    -64    
-240   -16    
16     -272   
64     -304   
0      -320   
16     -288   
-128   -304   
240    336    
-800   -64    
448    160    
-240   16     
-528   -32    
112    32     
128    0      
-80    0      
16     16     
0      16     
32     64     
-80    0      
320    16     
-400   -128   
-288   48     
64     272    
288    672    
112    496    
64     192    
-224   288    
-112   64     
-144   128    
112    96     
-384   352    
16     -96    
-304   -144   
-32    80     
-128   0      
-208   -352   
208    -352   
240    448    
-464   192    
48     -592   
-96    48     
-128   96     
128    -192   
-48    144    
16     64     
-64    -208   
-112   32     
-640   192    
-80    16     
96     -592   
-160   192    
-32    -544   
-96    -192   
-96    464    
-16    -288   
-304   -240   
112    272    
-192   0      
-96    -48    
128    -64    
48     224    
-112   224    
-128   32     
-48    -240   
304    736    
-256   400    
-144   -256   
160    -368   
-96    -48    
32     224    
-16    336    
-128   -672   
-112   -400   
80     -160   
-32    -48    
-128   -96    
128    112    
-192   64     
112    -96    
-576   -192   
128    -16    
0      -48    
-208   -432   
112    -272   
112    144    
-48    48     
-80    128    
-32    208    
-32    272    
-160   32     
-112   -112   
32     -64    
-272   -160   
-48    128    
-288   -112   
32     32     
112    128    
48     96     
-80    128    
272    336    
0      224    
-176   16     
112    -80    
224    432    
-304   -96    
-32    -64    
-32    144    
-224   -80    
48     80     
-96    48     
256    288    
-432   -144   
0      112    
128    208    
-384   -192   
-64    -192   
16     -112   
112    -64    
112    32     
208    160    
96     -32    
80     64     
144    96     
0      64     
-144   128    
32     64     
-144   -80    
-48    -160   
144    -64    
-80    112    
-80    96     
-320   -32    
288    208    
-224   -16    
-48    -16    
-144   112    
304    112    
0      96     
80     112    
-304   -192   
208    64     
-32    -160   
-144   -64    
32     32     
16     80     
-80    0      
-192   -16    
128    32     
288    272    
-16    384    
224    304    
80     48     
-80    -272   
176    0      
48     -32    
-112   32     
80     128    
-96    16     
-48    -48    
144    160    
192    256    
-48    176    
48     80     
80     112    
32     32     
224    80     
240    112    
-112   32     
64     64     
-48    -32    
80     96     
128    0      
112    -32    
192    192    
-112   48     
-32    64     
48     48     
-48    -64    
-32    -80    
-16    16     
-16    80     
-16    128    
-64    32     
80     16     
16     176    
352    128    
-256   32     
-16    48     
0      -16    
160    48     
160    96     
-80    80     
80     144    
16     16     
16     48     
32     80     
16     16     
-144   16     
80     -32    
80     -64    
48     48     
176    192    
-128   48     
288    352    
-160   96     
48     128    
-144   -16    
48     48     
144    128    
-192   128    
192    192    
-32    96     
-336   -496   
144    -2336  
160    128    
-112   48     
-48    48     
272    64     
-96    368    
-80    -48    
-112   -32    
112    -64    
32     0      
-80    -160   
-32    0      
128    32     
48     160    
-496   48     
-32    -1040  
-112   96     
112    32     
128    112    
-80    48     
48     80     
80     48     
48     96     
112    96     
16     16     
64     128    
-16    80     
-16    -128   
176    272    
112    208    
-64    96     
48     64     
176    80     
96     96     
-16    288    
32     192    
-112   -48    
16     -112   
144    0      
-16    80     
-144   -512   
224    -96    
128    -112   
64     16     
16     -224   
-64    -720   
176    16     
-144   -352   
224    272    
-144   320    
48     144    
64     32     
112    48     
-64    -272   
192    192    
-192   176    
0      192    
-224   -48    
304    -48    
128    208    
-176   -336   
192    -336   
-32    -160   
144    208    
32     32     
-96    96     
192    144    
-128   -368   
320    320    
-96    240    
32     -496   
176    736    
128    -128   
-16    -176   
-32    -192   
16     192    
192    432    
-32    16     
160    96     
160    544    
16     128    
-16    -304   
112    128    
96     16     
-112   -64    
368    -64    
80     80     
-80    112    
128    -320   
160    576    
80     96     
80     16     
32     -208   
-80    -48    
96     -240   
0      144    
192    224    
-208   112    
96     352    
304    352    
-160   -112   
176    -224   
64     64     
160    -240   
240    -32    
32     -80    
128    240    
-320   -992   
112    -464   
224    256    
80     288    
-32    -16    
176    240    
128    -48    
-192   336    
-48    304    
240    -48    
-64    496    
288    -48    
-16    880    
208    -592   
-80    304    
80     -160   
-208   160    
128    -400   
96     -32    
16     672    
-32    -352   
-176   -752   
400    544    
-160   208    
176    -400   
-272   -1520  
96     -160   
0      112    
-416   -16    
640    -80    
-288   -416   
528    -64    
-352   -256   
192    -32    
0      48     
32     -720   
-16    -384   
240    160    
-208   -80    
208    -208   
208    -80    
-224   -880   
-160   464    
144    -96    
-48    -64    
-112   -48    
128    0      
-48    -16    
-48    -640   
32     32     
112    0      
112    112    
-80    -96    
160    -320   
96     -64    
96     -176   
80     480    
-64    -720   
64     -512   
144    -1248  
-384   -432   
304    560    
-128   -224   
-64    48     
64     256    
-16    -240   
80     224    
-496   0      
144    -160   
-464   48     
528    512    
-400   16     
-144   -272   
320    -48    
-144   -736   
96     -160   
112    -32    
-240   -240   
576    128    
-304   496    
416    176    
-64    -400   
-304   -272   
256    -224   
-560   160    
-96    64     
64     -144   
128    0      
0      -64    
16     32     
160    0      
-16    -496   
16     80     
144    -96    
-16    80     
16     -128   
32     16     
-112   336    
304    160    
-240   -256   
48     -784   
-608   16     
192    144    
0      -32    
288    80     
-96    -64    
144    -256   
160    128    
-128   -144   
192    144    
-144   208    
96     64     
208    464    
-320   -480   
-176   -144   
96     -320   
-336   -192   
80     -112   
-592   144    
160    0      
-128   112    
-16    -272   
128    128    
64     -1056  
32     96     
-80    -48    
48     16     
-96    64     
112    -192   
0      -16    
-64    -192   
272    -448   
0      -272   
-144   224    
96     -176   
48     80     
176    32     
112    96     
240    -672   
-272   -224   
-96    -112   
128    -112   
48     208    
-16    16     
-16    -80    
112    -304   
0      -16    
288    -96    
48     0      
176    -224   
-16    48     
544    160    
-368   208    
176    -512   
32     -80    
64     0      
64     -16    
-240   80     
96     496    
-208   -64    
224    -112   
-64    -32    
16     -80    
-1200  -32    
80     -112   
-48    64     
0      -304   
112    96     
32     -48    
16     32     
-96    64     
224    -16    
-112   48     
208    64     
-160   0      
0      -32    
128    64     
48     48     
-336   -16    
-1568  -272   
144    160    
-928   48     
48     16     
32     80     
-400   16     
-144   -16    
-400   -80    
64     48     
0      -16    
112    32     
112    48     
96     624    
496    448    
-544   -80    
0      -336   
-176   -48    
16     -80    
-192   -400   
-80    240    
-416   -128   
-16    -208   
-160   32     
-32    256    
64     272    
-32    112    
-240   -176   
-160   -144   
0      -256   
-32    -32    
32     32     
320    416    
-304   80     
-208   -48    
-272   64     
-144   -32    
96     112    
-128   176    
16     112    
-320   48     
-48    -80    
-960   -160   
304    240    
112    -80    
48     128    
-144   48     
80     -128   
32     16     
-160   -64    
-16    96     
80     32     
96     128    
-240   -512   
-48    16     
-176   -16    
-320   16     
-112   16     
-96    0      
32     -32    
48     176    
-96    -160   
-112   -16    
176    128    
-144   96     
0      48     
32     128    
-128   144    
128    160    
-320   48     
80     32     
96     256    
-432   0      
48     96     
-240   -112   
80     112    
-160   -128   
208    208    
48     304    
-288   160    
-16    32     
-128   -80    
112    16     
240    112    
-48    32     
160    32     
32     64     
-48    -16    
64     48     
-624   -16    
128    96     
-16    112    
16     80     
-64    64     
32     32     
-144   48     
48     0      
144    96     
-16    48     
-32    96     
-128   0      
144    80     
-240   -96    
32     -48    
-272   32     
240    160    
-112   128    
-48    0      
96     128    
-32    -48    
-16    32     
16     64     
-80    32     
-96    -16    
-32    -16    
-112   16     
-48    -64    
-176   -256   
496    112    
-368   16     
-192   -16    
176    32     
-128   -48    
-16    -192   
0      48     
80     352    
160    320    
-160   32     
80     -240   
16     368    
-16    -16    
160    -16    
16     576    
80     448    
-96    -48    
-48    0      
16     -176   
64     32     
96     560    
80     176    
-128   0      
160    -64    
-320   -192   
80     160    
80     288    
-192   -160   
128    208    
-192   32     
368    256    
-496   -112   
32     -48    
64     -48    
-32    -128   
16     -112   
-32    -128   
16     -32    
-96    -384   
-16    192    
80     48     
16     96     
80     80     
-128   -384   
-64    384    
16     80     
-16    48     
96     112    
0      32     
16     64     
64     80     
80     -32    
-192   16     
96     176    
-144   320    
16     -400   
16     -64    
-80    192    
176    64     
-208   -256   
80     -96    
0      160    
-48    256    
-48    -448   
96     112    
-144   496    
112    -32    
-256   -80    
-176   -144   
224    -160   
-352   -272   
448    48     
-144   192    
240    672    
-96    48     
-128   -336   
272    80     
-144   224    
0      -96    
384    64     
0      112    
48     256    
160    32     
352    800    
-288   -80    
-112   -544   
160    -48    
0      272    
112    -16    
64     -144   
208    -96    
-48    288    
144    -80    
32     96     
288    48     
16     208    
208    -176   
112    144    
80     96     
-144   -208   
48     304    
32     144    
-192   -608   
480    592    
-192   512    
176    -976   
-208   -352   
144    288    
-96    352    
128    224    
-96    -32    
0      32     
-128   16     
176    1184   
-272   -32    
-64    -368   
400    -32    
128    480    
-96    -160   
208    128    
-144   -208   
-64    -880   
640    64     
-16    1040   
112    -16    
16     -32    
16     144    
144    -16    
-96    -64    
64     -208   
96     -480   
432    80     
-64    368    
352    16     
176    -224   
64     -176   
144    272    
48     80     
64     -32    
-112   400    
144    -96    
16     192    
-80    16     
-80    160    
160    80     
-112   0      
64     96     
80     -480   
128    -16    
-112   -400   
64     64     
224    304    
-128   -736   
224    -32    
112    176    
-192   -240   
48     -320   
288    352    
-336   32     
240    -96    
-208   112    
128    528    
32     -352   
160    32     
16     256    
16     -528   
80     224    
144    -112   
-64    -208   
64     -1088  
64     -112   
-32    -32    
80     528    
-80    256    
176    144    
-288   -48    
-128   -336   
64     272    
64     272    
-16    -32    
208    -144   
80     192    
-16    -352   
64     80     
-96    -672   
208    16     
-96    128    
80     16     
32     64     
192    64     
-32    176    
256    -32    
-112   80     
224    -272   
64     80     
32     -192   
32     80     
224    0      
-256   -32    
128    -224   
-16    -160   
64     -320   
0      -368   
16     -112   
256    32     
-128   48     
144    -16    
-64    128    
80     -80    
-48    48     
0      -480   
16     -32    
240    -320   
-32    144    
16     -32    
16     176    
0      96     
-16    160    
96     0      
176    -1408  
128    -560   
-64    -144   
48     -992   
256    -192   
-16    160    
80     -80    
48     48     
48     144    
48     128    
64     -80    
-80    -848   
112    160    
384    240    
-240   128    
-160   160    
256    -64    
32     32     
0      -272   
-80    32     
0      -256   
-128   -112   
272    208    
32     -48    
-112   80     
96     -112   
-48    -48    
48     48     
32     -16    
16     16     
-256   -96    
-288   -336   
64     -16    
-32    -176   
176    -192   
-32    -320   
112    64     
96     -1936  
-128   32     
112    -208   
-320   -48    
320    -144   
16     256    
160    -144   
-80    -176   
-336   -64    
176    96     
-784   -96    
80     16     
112    -208   
-128   32     
224    256    
-48    112    
96     160    
48     32     
-240   -144   
336    48     
-256   -352   
176    -64    
-144   -304   
0      -16    
-80    -128   
-352   -144   
400    -64    
80     64     
32     -288   
-16    32     
192    -176   
-32    -48    
256    -304   
-64    -96    
176    -80    
-64    48     
-192   -304   
416    -288   
-176   160    
368    112    
-384   160    
96     64     
-1488  -16    
0      -64    
96     128    
0      -96    
32     -64    
176    -1248  
-32    144    
-16    -112   
16     16     
0      0      
80     16     
0      -176   
-32    48     
-16    -96    
-224   -16    
288    80     
48     48     
-688   0      
240    -32    
-144   -16    
96     0      
304    48     
-208   -64    
304    -16    
-496   -32    
272    -16    
-272   -16    
112    -32    
-64    32     
-32    16     
-48    208    
208    80     
-576   80     
112    -176   
-112   -224   
-112   -192   
112    -16    
0      -688   
112    -64    
-224   -48    
336    80     
-336   80     
-96    16     
16     -16    
32     -80    
-320   -96    
-64    -240   
-80    -128   
144    -192   
-32    -16    
160    -144   
64     80     
-128   -240   
-48    -176   
32     32     
-32    80     
16     80     
64     -32    
-112   -32    
112    144    
32     144    
176    128    
-96    64     
-32    -96    
160    256    
-288   -64    
-144   144    
-112   48     
-944   -64    
96     48     
-448   240    
-128   256    
0      80     
-80    -96    
96     64     
0      -144   
-304   -48    
304    640    
-176   -16    
-160   32     
-160   -288   
-336   80     
112    304    
-32    -32    
-128   272    
-48    128    
-176   0      
-512   96     
-224   160    
16     -144   
-112   -16    
-32    -160   
144    112    
-320   -128   
48     80     
-128   -64    
32     80     
0      64     
-16    48     
-304   -368   
160    -144   
48     224    
-32    512    
-240   64     
-192   -96    
80     -416   
-320   336    
-32    -400   
-176   -192   
176    64     
-80    208    
112    -160   
-16    112    
-160   -160   
-16    16     
-48    224    
-16    48     
-304   112    
48     96     
-656   80     
48     -80    
-48    80     
48     128    
-176   80     
80     -160   
-96    -192   
-192   144    
-16    112    
-96    -64    
16     -96    
-128   112    
-16    80     
-288   -384   
0      272    
-64    256    
-144   256    
0      64     
0      48     
-144   -144   
-16    48     
-64    48     
64     0      
-128   16     
144    112    
-64    48     
64     0      
-224   -32    
16     64     
0      64     
-240   48     
32     48     
-928   -192   
32     144    
-16    -144   
80     -32    
-80    128    
32     -112   
48     -96    
-16    96     
16     64     
-336   -32    
112    192    
-336   272    
160    -80    
-512   -464   
-176   224    
-1040  -224   
-224   -192   
-112   -48    
-352   -288   
256    304    
-48    160    
-144   304    
16     160    
-80    -544   
304    -192   
-96    320    
-272   128    
368    320    
-192   464    
-96    496    
-912   -256   
80     -240   
-128   624    
-176   -272   
80     -64    
16     64     
64     -544   
240    16     
-144   480    
208    -32    
144    352    
-288   208    
-16    48     
80     -208   
96     208    
-256   0      
-288   -48    
352    -368   
-16    448    
-32    -176   
160    -240   
64     160    
400    256    
-80    624    
112    -48    
16     -112   
48     192    
16     112    
-192   -160   
224    -32    
64     96     
-64    -112   
48     160    
192    176    
64     112    
160    32     
112    32     
-96    80     
-240   -320   
192    -560   
-208   416    
368    -128   
160    -352   
-288   288    
112    752    
-144   400    
96     160    
48     160    
-32    192    
0      256    
-96    288    
48     16     
-304   -368   
-80    -48    
48     80     
176    464    
-272   176    
176    176    
-176   80     
0      144    
144    16     
240    128    
-16    -32    
-96    32     
144    -64    
-64    -64    
96     -80    
128    32     
32     -48    
48     -256   
32     -48    
80     -288   
64     112    
-96    -368   
-32    -80    
240    96     
-128   -16    
80     -32    
224    160    
16     160    
-80    -288   
64     112    
192    208    
-160   144    
-128   48     
-112   224    
-128   80     
-32    176    
96     224    
-64    -96    
-160   64     
240    -240   
-256   -64    
176    48     
-80    192    
80     48     
80     64     
48     64     
32     128    
-160   -80    
-64    112    
160    128    
-16    80     
-96    128    
-112   -816   
32     -336   
-144   -96    
128    112    
-160   -16    
128    0      
80     80     
80     112    
160    256    
-112   64     
96     -16    
0      176    
384    -192   
-224   -240   
480    432    
-592   -672   
96     16     
320    320    
-224   160    
-160   160    
96     32     
48     -48    
-80    16     
48     80     
-16    176    
-32    -176   
-48    96     
48     -32    
-176   -80    
64     32     
32     -128   
80     64     
-16    -80    
0      48     
80     -112   
144    112    
16     32     
96     96     
48     -64    
48     128    
-32    -16    
0      16     
-16    -32    
-48    16     
128    96     
48     -32    
-208   128    
432    304    
-112   96     
-16    32     
96     80     
-32    16     
320    224    
-304   48     
16     224    
160    48     
-64    32     
144    -112   
16     -224   
144    -48    
-176   -256   
192    48     
80     -176   
32     48     
0      32     
112    240    
-32    48     
48     352    
-192   -32    
112    80     
-64    0      
112    -96    
64     96     
-80    -160   
288    144    
-80    -96    
-32    320    
64     -48    
112    16     
80     -1568  
-16    -32    
-32    -80    
176    48     
48     48     
240    128    
-32    96     
176    128    
-32    128    
144    -64    
-16    48     
336    -32    
-80    48     
48     -160   
336    224    
-96    -16    
48     96     
-128   -48    
224    144    
16     304    
128    16     
-48    -16    
288    -496   
-96    64     
192    112    
96     128    
192    16     
-32    96     
-176   -656   
-112   -48    
-48    -128   
80     32     
-128   16     
80     -144   
-112   96     
256    368    
-256   64     
96     -288   
-48    128    
48     -112   
-64    96     
-16    -176   
112    48     
-32    -16    
160    176    
-48    48     
240    128    
-48    128    
96     -1472  
112    -16    
-176   -64    
64     -400   
128    32     
-80    -688   
80     -64    
-240   -80    
256    0      
-144   -48    
240    16     
128    -624   
48     64     
-16    96     
96     0      
240    96     
-304   112    
-128   -16    
64     -80    
192    -32    
144    208    
-176   96     
0      -512   
-128   -272   
224    160    
-32    -64    
-64    -544   
96     16     
352    -80    
-112   80     
128    32     
144    208    
-80    -144   
-96    -352   
48     -224   
480    64     
-96    64     
96     256    
-16    64     
16     -496   
64     -96    
0      -352   
48     80     
112    -64    
48     0      
16     -176   
192    -32    
-48    32     
64     -192   
-176   -48    
176    80     
-144   -64    
160    -64    
80     208    
48     -864   
160    -80    
16     400    
112    -144   
272    432    
-240   560    
80     -640   
-128   416    
-32    -288   
304    -144   
-16    560    
-128   -32    
96     -144   
-304   -272   
336    -768   
128    336    
64     48     
112    -1600  
-128   64     
368    -368   
-208   128    
48     -80    
80     64     
80     64     
-80    -32    
-512   -32    
160    -64    
-1264  -64    
128    -32    
48     16     
48     -80    
96     272    
48     -256   
-112   32     
320    -32    
-80    256    
192    176    
0      96     
-48    48     
192    -208   
-304   80     
80     -144   
-32    192    
-160   240    
224    -64    
-96    -368   
80     -16    
48     -448   
-32    48     
128    -16    
16     16     
-16    -32    
-64    0      
-608   -64    
128    -48    
-48    -16    
-176   -272   
-96    -160   
240    -112   
-112   -64    
144    -288   
32     144    
64     -224   
96     160    
-16    704    
16     352    
-416   336    
-80    48     
64     -16    
-64    -16    
0      208    
32     -160   
-160   48     
80     -96    
-96    -48    
128    -240   
32     176    
96     -48    
96     48     
-336   16     
64     -16    
-80    80     
256    96     
-32    192    
112    -80    
-224   464    
288    288    
16     -16    
96     240    
-48    144    
-16    64     
-32    208    
-640   -272   
192    304    
-576   256    
-576   -192   
-32    -224   
-1152  48     
224    128    
32     32     
-32    16     
-96    -208   
368    320    
-240   256    
-80    32     
-192   -128   
-256   352    
-432   -400   
32     0      
32     -16    
-16    -96    
-176   96     
272    -176   
-208   272    
-64    -608   
112    -80    
288    64     
-64    224    
-32    -112   
-32    -400   
-64    96     
208    272    
-272   176    
-96    -256   
-112   144    
64     384    
-464   -496   
-256   -128   
-64    16     
64     272    
-144   176    
-208   0      
112    -112   
-128   -240   
320    32     
-240   -320   
368    112    
-224   64     
-80    0      
-112   -16    
-112   -128   
-224   -64    
32     -48    
-16    -112   
-528   -608   
96     -240   
-384   -64    
48     64     
-144   16     
368    224    
-352   176    
176    256    
-400   400    
0      -144   
-112   -96    
128    -16    
-144   16     
-96    16     
-16    48     
-80    48     
-48    112    
-112   16     
-48    144    
16     240    
-32    224    
-320   128    
32     16     
-144   0      
32     -32    
-16    48     
-320   -48    
128    16     
64     176    
-176   80     
-400   96     
240    -32    
-96    80     
112    128    
-528   0      
192    96     
-80    64     
-16    48     
16     160    
96     112    
-192   -16    
-64    16     
-64    -16    
-192   -16    
0      112    
-96    -16    
-48    16     
-224   -112   
16     48     
-464   -160   
-96    -704   
-48    144    
-112   -16    
48     96     
96     64     
-240   -16    
-32    80     
48     240    
-80    112    
-144   48     
128    208    
-176   80     
-192   0      
-96    112    
16     32     
-96    48     
80     -32    
-128   -144   
-96    -224   
16     48     
32     64     
-176   -64    
64     48     
112    192    
-160   144    
-112   96     
32     144    
-64    32     
-16    0      
-320   -48    
192    224    
-192   32     
48     112    
64     32     
0      128    
192    320    
-176   -80    
144    -112   
-192   32     
208    0      
-192   -144   
64     112    
32     0      
-112   96     
192    16     
-96    -64    
-64    -192   
80     80     
192    176    
-256   0      
16     16     
272    288    
-272   0      
-64    0      
176    0      
0      64     
80     144    
-80    80     
-32    0      
160    272    
-80    0      
96     160    
80     32     
96     80     
96     16     
-64    96     
0      16     
144    64     
-16    32     
-240   48     
272    -32    
96     -48    
-176   48     
208    160    
-192   176    
192    96     
16     160    
240    -48    
-304   0      
336    -16    
-176   0      
64     80     
176    128    
-32    -32    
-16    16     
-80    -16    
80     16     
0      -32    
176    -96    
-16    -48    
192    -48    
128    112    
0      48     
112    128    
-96    -16    
176    128    
-112   16     
192    48     
128    96     
48     -32    
64     160    
0      96     
144    128    
-144   80     
48     80     
192    144    
-128   208    
96     128    
-160   176    
48     48     
112    128    
-48    64     
-112   0      
0      0      
0      144    
-16    -16    
-96    -240   
48     112    
-64    32     
112    -16    
96     64     
32     208    
-16    48     
-144   32     
144    0      
-16    112    
-16    -48    
0      112    
-96    -96    
-48    -16    
368    -144   
128    -16    
80     80     
-48    -1472  
48     144    
320    384    
0      160    
0      -32    
176    208    
0      -16    
224    112    
-112   -32    
176    112    
0      96     
112    144    
-32    64     
192    160    
0      96     
16     -224   
112    112    
-16    -192   
160    -32    
-192   48     
512    -112   
0      48     
144    96     
-304   -48    
336    240    
48     48     
48     0      
32     192    
32     -48    
-144   80     
96     -80    
-32    96     
-32    -384   
16     0      
-144   16     
256    256    
16     96     
-16    144    
16     64     
16     32     
-80    -96    
128    -96    
48     -144   
-64    -160   
224    160    
-64    -112   
-16    96     
-128   -656   
288    -304   
64     -1056  
336    336    
0      352    
80     416    
112    0      
480    240    
0      528    
32     -32    
192    96     
0      -112   
96     48     
-16    -544   
192    144    
0      48     
-128   64     
96     -464   
-48    -112   
-224   32     
256    240    
0      96     
0      416    
-80    -80    
-80    -384   
192    64     
192    -592   
-160   -64    
96     -192   
192    224    
0      -208   
48     48     
96     -608   
16     240    
16     80     
240    128    
-112   160    
64     256    
192    272    
-64    64     
48     336    
0      -48    
0      80     
352    -96    
-96    112    
80     -112   
64     80     
32     -960   
64     80     
-128   96     
160    144    
-48    -16    
64     -48    
16     -1216  
-48    -128   
416    176    
-256   128    
320    112    
0      16     
160    128    
0      -304   
240    -272   
128    -208   
176    0      
-16    128    
64     -544   
-64    64     
-608   48     
80     -96    
-80    144    
192    -144   
-208   -320   
192    -2816  
160    -80    
-48    128    
112    -64    
16     80     
-48    -48    
96     -208   
-272   -240   
224    -368   
32     -16    
-80    -80    
-48    16     
96     -96    
224    -16    
-32    -176   
32     -688   
0      -176   
144    -32    
-64    -192   
144    -96    
112    304    
80     -48    
80     64     
64     -16    
336    208    
-256   272    
-144   -160   
80     -432   
256    -320   
48     112    
144    -224   
32     64     
144    -672   
-80    32     
176    -80    
0      224    
112    592    
-128   -32    
48     -416   
240    0      
-528   -64    
64     -336   
-592   128    
112    16     
-128   -224   
592    528    
-480   448    
80     -816   
-224   352    
416    -304   
-192   224    
128    -128   
176    288    
-208   -80    
-96    -272   
112    112    
80     128    
-208   -48    
192    192    
0      -192   
0      -128   
-160   -224   
0      -192   
96     368    
-96    -400   
80     -16    
-224   -592   
64     -368   
208    -48    
96     0      
48     32     
176    -128   
-192   -176   
128    -240   
-464   0      
80     -16    
-16    -96    
-32    288    
256    512    
-192   -432   
16     -112   
96     -160   
224    -144   
192    96     
-128   112    
96     128    
96     -192   
-240   -128   
176    16     
-272   32     
-16    -112   
160    160    
-64    -112   
-112   -16    
112    -384   
208    128    
-576   -512   
592    32     
0      304    
-192   -192   
-464   -16    
176    -112   
-336   32     
144    -16    
-352   176    
224    -96    
-160   80     
288    -160   
-96    128    
0      -64    
-96    32     
96     64     
16     -144   
-400   112    
128    -64    
-208   0      
208    32     
80     144    
-64    160    
-160   -16    
-80    -208   
288    -16    
0      -288   
256    -160   
112    -304   
-1136  80     
160    256    
-1728  -96    
64     -16    
-32    96     
-80    -32    
-96    -48    
-128   128    
16     -80    
-48    176    
-752   -112   
16     64     
-48    -48    
48     80     
-496   -160   
-32    -48    
0      144    
112    16     
32     -32    
16     112    
32     64     
-32    0      
-112   -16    
32     -80    
64     160    
-448   -80    
-80    80     
-384   -224   
80     -112   
-16    48     
-32    224    
32     96     
-160   48     
-16    32     
-48    32     
-64    32     
-448   0      
-48    160    
96     96     
-144   224    
128    112    
-96    64     
48     112    
-160   80     
48     -16    
0      64     
96     128    
-96    16     
-192   -48    
-208   16     
-160   64     
224    400    
112    16     
-608   -240   
256    160    
-80    -64    
-64    32     
80     -16    
-48    -96    
0      96     
16     -64    
-80    -64    
112    144    
-80    32     
-48    -32    
-16    -32    
0      0      
-32    -160   
-976   -160   
80     -16    
-176   96     
320    400    
-64    112    
-64    -16    
128    48     
-176   -48    
-32    64     
176    64     
-224   192    
-80    16     
96     160    
-240   -64    
-80    160    
-144   -96    
32     64     
96     -64    
112    112    
-48    160    
-80    32     
64     0      
-160   -48    
-48    0      
144    0      
-64    64     
-16    16     
-64    -16    
-208   -80    
176    48     
-144   -16    
48     48     
-336   -320   
-48    96     
176    144    
-320   48     
128    48     
48     64     
-320   -80    
240    -16    
208    112    
-320   -64    
16     144    
-240   -48    
240    48     
-112   32     
48     128    
-560   -144   
-32    -48    
128    16     
0      80     
400    432    
-224   224    
-48    48     
-64    -32    
80     48     
32     32     
-16    96     
-16    -112   
-80    -32    
-128   -96    
112    208    
-976   -32    
-48    48     
128    64     
-64    176    
96     80     
-192   -48    
16     -96    
0      -224   
64     96     
48     80     
-160   16     
-192   -32    
192    272    
-32    144    
-64    480    
-224   160    
176    -48    
-80    -48    
224    192    
-96    16     
416    416    
-96    736    
0      448    
-16    128    
-144   -48    
-96    -80    
112    -112   
16     -48    
80     96     
32     96     
224    176    
-160   -32    
-176   64     
80     64     
-112   112    
16     112    
-16    96     
32     -16    
-32    304    
-80    272    
-32    112    
0      32     
-80    -128   
-32    32     
208    -48    
-192   160    
-16    16     
-80    -64    
96     -224   
-16    -160   
-64    -304   
80     -16    
-32    16     
96     48     
0      -32    
-16    80     
-16    32     
160    480    
112    64     
-368   128    
-368   -176   
-64    -256   
96     32     
48     176    
48     336    
-160   -208   
368    -144   
-160   256    
352    -224   
16     304    
48     -48    
112    176    
48     160    
224    288    
-224   48     
224    -160   
-48    272    
-16    -32    
48     208    
-48    0      
64     16     
16     128    
16     16     
64     112    
-48    16     
192    48     
-32    0      
-32    112    
-16    80     
96     240    
-144   -272   
368    -320   
0      400    
-80    48     
48     -160   
-64    -16    
128    0      
32     112    
-64    96     
224    224    
16     560    
-64    304    
176    240    
48     48     
112    400    
-144   -144   
128    16     
32     192    
-32    304    
256    -144   
80     576    
96     320    
-16    -32    
128    -144   
320    80     
-176   144    
128    16     
160    -112   
-32    0      
48     -1248  
-144   64     
176    128    
-80    48     
48     64     
32     96     
112    160    
-48    -304   
-48    32     
384    384    
-80    544    
64     64     
160    -128   
80     -288   
48     -48    
144    -784   
64     80     
80     144    
384    480    
-320   240    
0      -192   
64     256    
112    224    
-112   -48    
96     128    
-112   -176   
48     -48    
-16    64     
64     -16    
16     96     
-48    -208   
48     96     
96     -1184  
80     336    
-16    0      
80     112    
224    384    
-80    624    
80     688    
-144   -176   
-96    -288   
176    -432   
80     1328   
256    576    
-336   -352   
240    -192   
-160   64     
80     -32    
16     112    
192    -400   
-96    288    
80     -144   
96     80     
-96    -272   
112    256    
-160   48     
48     -160   
48     240    
64     -160   
-80    -208   
160    -864   
-48    -80    
0      -16    
80     208    
-16    -704   
-128   -16    
-16    160    
64     -112   
-176   -192   
144    -272   
-208   -64    
208    -304   
48     288    
-16    48     
144    224    
48     -80    
128    128    
224    32     
-144   96     
144    -16    
-64    0      
368    320    
-80    176    
16     -64    
64     -240   
240    96     
32     -112   
-112   112    
48     -208   
0      48     
64     432    
224    -96    
-144   -368   
416    256    
-48    240    
-176   -128   
48     32     
112    -240   
-64    224    
-192   -336   
-64    -1072  
432    176    
224    -224   
-80    -16    
112    160    
160    -16    
-224   48     
32     -32    
0      -832   
16     -32    
16     -192   
224    96     
192    -352   
0      32     
-832   -64    
144    -176   
-16    16     
176    160    
-288   -240   
176    -480   
384    256    
112    304    
-80    80     
160    64     
-112   0      
192    -112   
-112   96     
176    -240   
-16    16     
-368   -16    
272    176    
160    80     
-32    48     
144    16     
64     -624   
32     112    
32     -816   
32     80     
160    -16    
-144   -32    
224    -144   
96     80     
-176   48     
-32    112    
-448   144    
-112   -80    
208    -32    
-368   -224   
32     32     
-240   -80    
176    64     
-96    -352   
-176   -128   
96     -64    
64     128    
144    64     
112    128    
80     0      
96     -160   
-480   -128   
-16    -16    
-560   -208   
160    -16    
96     0      
32     48     
80     -176   
-96    -224   
-32    32     
-128   -96    
-16    -16    
128    96     
192    -96    
-192   -32    
176    -32    
-64    -16    
64     -64    
-128   80     
-176   -32    
-64    80     
-112   -352   
-384   -144   
256    -240   
-144   80     
128    -832   
96     112    
160    48     
112    16     
-480   -240   
240    -208   
-112   96     
176    336    
-32    -160   
-16    -48    
-176   -64    
-48    -176   
48     16     
112    -96    
96     144    
-64    -752   
128    0      
-208   0      
64     80     
-224   -16    
80     32     
144    160    
16     272    
-192   -64    
0      -80    
-112   64     
0      64     
160    64     
16     -304   
32     160    
144    -240   
48     64     
-128   -96    
160    -128   
-240   -144   
176    -64    
96     352    
-384   160    
-128   48     
64     16     
112    96     
-16    -48    
-32    48     
160    -208   
-64    160    
224    112    
-144   160    
-16    96     
144    48     
-224   -48    
208    16     
-208   32     
0      -48    
-32    16     
144    16     
-176   144    
160    -256   
-32    64     
-960   -176   
-48    144    
0      -240   
-416   16     
-160   32     
-960   32     
48     32     
-64    -48    
32     0      
-32    208    
208    112    
16     -16    
-48    32     
-1120  -160   
-144   -32    
0      -80    
352    352    
-288   256    
-224   -16    
96     16     
-624   -48    
-16    -288   
16     -400   
-208   -400   
-432   16     
0      304    
-160   -480   
240    112    
-112   352    
-48    176    
128    -192   
-48    64     
-80    0      
-240   -96    
-16    32     
-48    32     
-192   -32    
-240   64     
-352   -16    
-1936  -304   
-64    240    
0      128    
-64    -48    
-144   -112   
112    128    
-176   0      
-32    0      
64     -80    
64     -288   
-128   -368   
272    -288   
-224   80     
240    240    
48     192    
-480   176    
96     -32    
-240   -16    
-64    16     
32     -80    
0      368    
-96    -48    
-64    144    
-32    64     
80     272    
0      -128   
-272   -560   
-80    96     
80     240    
-128   -544   
-96    -256   
64     416    
-864   -144   
128    -16    
-112   -112   
192    256    
-48    -112   
128    -144   
144    208    
-160   -112   
208    336    
-240   32     
-16    -80    
-128   128    
-16    -16    
-96    -176   
-160   320    
-160   -192   
64     528    
352    320    
-64    -112   
-48    -144   
-112   -16    
144    16     
-112   32     
160    64     
144    112    
-128   -112   
176    -16    
-112   -144   
64     32     
-80    384    
-208   -64    
400    -192   
-176   144    
-128   -96    
288    -32    
-96    32     
-176   -112   
96     64     
224    528    
-288   -432   
64     -32    
80     160    
-144   -80    
192    -16    
144    400    
-352   -288   
304    16     
-192   80     
32     32     
-64    48     
-48    64     
176    176    
32     336    
16     32     
-208   -272   
-16    -80    
112    -192   
-128   240    
64     -80    
-48    -96    
-32    96     
-48    176    
16     144    
-80    -416   
0      -48    
192    128    
0      112    
64     784    
16     112    
64     -48    
-32    112    
-48    288    
224    240    
-416   -192   
240    -144   
-352   32     
272    -48    
64     496    
0      -48    
-16    -304   
16     48     
16     16     
128    80     
112    80     
-224   64     
96     32     
-64    96     
-32    96     
-128   -32    
64     112    
-96    -16    
32     80     
-48    0      
192    80     
-80    160    
-144   -160   
256    -304   
-16    96     
384    464    
-448   -672   
240    -64    
-32    576    
-32    272    
-16    -320   
16     160    
-128   -80    
112    -208   
-224   -64    
160    448    
-48    -64    
32     -16    
128    96     
-112   -272   
64     0      
-112   -48    
96     256    
-80    128    
96     -80    
48     208    
144    112    
128    112    
176    208    
-64    -16    
-144   -160   
512    224    
32     448    
144    -160   
-128   -96    
-160   -240   
64     224    
112    304    
-16    -16    
-64    -16    
-80    112    
-16    -336   
176    208    
-224   96     
48     640    
208    544    
-144   256    
64     96     
-112   16     
80     -80    
112    -80    
0      -48    
112    208    
-288   0      
352    48     
-80    64     
160    -368   
-96    80     
176    48     
16     16     
176    112    
-48    80     
192    288    
-160   128    
-48    16     
176    32     
-32    32     
208    144    
-32    160    
160    96     
-48    16     
128    -64    
0      176    
-128   -240   
-176   -64    
336    128    
-176   96     
48     48     
-48    96     
16     96     
-208   0      
48     -368   
288    272    
-32    0      
-16    -160   
-80    240    
400    32     
-224   112    
16     -1216  
80     16     
16     -48    
-80    -112   
320    32     
-192   112    
144    16     
288    496    
-320   96     
208    128    
-80    128    
-96    -240   
-128   0      
192    -64    
32     -96    
240    -448   
320    112    
208    -160   
240    368    
-144   384    
80     160    
-176   48     
208    256    
64     -32    
-80    176    
-48    96     
64     -16    
96     128    
96     -160   
-64    -48    
96     -96    
176    -160   
128    -1488  
208    0      
-64    -272   
176    -208   
336    96     
64     208    
-48    96     
-32    -32    
48     -16    
144    -336   
160    0      
208    16     
48     224    
-16    -368   
-48    -160   
-16    -1104  
-80    240    
80     -48    
-256   112    
144    32     
-176   0      
144    80     
-32    64     
-16    80     
-64    -160   
48     144    
-64    -64    
-32    176    
-32    -48    
-48    -16    
80     -48    
208    48     
-128   80     
-112   -192   
-96    0      
112    96     
32     240    
-112   -112   
64     -16    
-48    -32    
192    32     
96     0      
160    176    
-64    -16    
-96    64     
208    -64    
288    128    
16     -336   
-80    96     
128    176    
-48    0      
32     128    
192    -224   
-64    304    
48     -48    
32     96     
32     -112   
0      96     
48     -32    
80     16     
-80    -160   
160    224    
-240   48     
272    -1808  
64     96     
16     0      
16     -112   
160    -144   
128    -448   
16     -32    
176    -96    
-160   -80    
96     144    
304    16     
-80    112    
0      -480   
-16    -640   
96     128    
272    -336   
32     0      
48     -304   
16     -432   
-688   224    
160    48     
-64    0      
192    -144   
16     -96    
144    -1168  
32     0      
256    0      
80     -64    
-112   -96    
64     240    
208    -48    
-96    -16    
-128   -128   
32     -64    
-576   -64    
80     -224   
304    160    
-160   80     
112    272    
-128   -400   
128    32     
112    -1536  
0      -48    
128    448    
-64    288    
-16    -80    
256    304    
-320   160    
128    128    
-176   -64    
-48    -176   
32     16     
176    16     
32     160    
112    -80    
-80    -80    
32     -128   
160    160    
96     -208   
-48    96     
192    400    
-32    -112   
-64    -96    
64     -112   
-96    64     
-32    -32    
-32    0      
16     -32    
-48    -368   
112    16     
-48    80     
144    416    
-80    -144   
16     -208   
256    784    
-352   -784   
64     -480   
-192   544    
-192   -704   
-160   832    
48     -272   
-448   48     
32     -48    
-752   -48    
80     -304   
80     -64    
80     -64    
-64    -352   
48     -1616  
400    176    
-272   560    
144    -432   
-192   96     
112    -192   
208    96     
-224   -32    
176    -352   
-96    208    
-912   0      
32     -352   
-112   0      
128    -256   
-48    176    
48     -240   
96     -16    
-16    16     
112    -96    
96     208    
96     160    
32     464    
48     128    
192    -208   
-48    -48    
352    -32    
-96    -80    
-64    -608   
448    -288   
224    672    
-32    -912   
80     -288   
-224   -96    
192    528    
32     704    
-176   -320   
-192   -192   
16     -64    
32     176    
-112   -256   
-272   0      
48     -16    
32     64     
224    112    
-224   48     
-144   -256   
-160   128    
-272   -96    
-48    384    
-144   352    
-32    -48    
-400   -672   
192    -448   
-160   576    
128    -112   
32     -128   
-1552  -144   
64     112    
-608   -240   
352    480    
-128   160    
-48    -1008  
-208   624    
-112   112    
-96    -320   
-688   816    
-32    96     
0      0      
-112   48     
-64    -160   
0      -192   
-464   -304   
176    560    
16     -144   
-160   144    
-112   80     
-192   -48    
-208   -48    
-240   -32    
32     80     
-48    -64    
64     112    
-80    64     
-96    -64    
-368   -192   
48     -48    
-96    240    
-48    -256   
288    416    
-432   160    
96     16     
-576   -1104  
160    352    
-240   160    
240    -544   
-144   736    
80     -240   
-496   448    
-336   384    
96     -352   
-48    -192   
-16    656    
400    32     
-528   144    
-16    -128   
32     -144   
-208   16     
112    80     
-336   -144   
224    -224   
-240   32     
-128   -272   
32     400    
-16    -64    
128    -128   
16     176    
-80    -352   
144    -48    
64     80     
-32    0      
-48    64     
-64    32     
-32    48     
-48    0      
-112   0      
-144   0      
192    384    
-400   320    
128    80     
-480   -176   
48     -336   
32     64     
176    256    
-240   -720   
192    -160   
32     -208   
-96    -192   
16     336    
-48    -48    
144    -144   
-176   -160   
320    176    
-352   80     
64     48     
-128   -16    
80     16     
32     -16    
272    160    
-176   16     
-32    192    
-144   -80    
-144   48     
48     -16    
-16    -96    
64     -32    
144    160    
-16    144    
-96    32     
240    288    
-368   48     
-16    160    
-688   -80    
-272   -48    
240    32     
-112   -16    
-64    0      
48     128    
192    80     
0      16     
48     16     
-176   -16    
80     -80    
-304   0      
240    48     
-304   -16    
160    112    
112    112    
-112   32     
-176   -240   
64     -32    
32     128    
-320   256    
240    32     
-208   -48    
128    -64    
-160   -288   
224    -32    
16     32     
80     -16    
-48    -16    
-80    80     
80     80     
-48    80     
32     64     
16     192    
144    144    
-16    64     
0      96     
32     48     
-64    128    
0      128    
80     80     
-304   -16    
320    224    
-416   64     
-16    176    
-48    48     
-176   160    
432    224    
-112   160    
144    224    
80     224    
-32    256    
-16    176    
-144   48     
48     -96    
-64    16     
-16    -160   
128    -64    
176    48     
272    256    
640    608    
-272   208    
64     -208   
16     -160   
64     -16    
-80    352    
-96    -144   
-64    32     
-272   -64    
-240   32     
-224   112    
-16    240    
-192   112    
-144   48     
-80    -112   
64     16     
64     192    
-48    224    
-16    -352   
112    -128   
64     48     
32     -16    
0      96     
48     48     
0      16     
0      128    
-112   -32    
224    176    
-80    96     
-128   0      
368    240    
320    176    
-80    160    
64     80     
32     128    
112    48     
-112   0      
32     0      
208    80     
-112   32     
96     272    
-320   32     
-160   -1104  
128    96     
-16    32     
64     96     
-48    -32    
96     144    
240    32     
48     96     
96     80     
-112   80     
144    80     
128    144    
-64    -32    
256    208    
-240   64     
-16    -128   
240    128    
0      -368   
32     -32    
32     144    
-112   80     
-16    32     
80     48     
48     176    
16     96     
-48    96     
32     48     
-64    -96    
64     -48    
0      32     
16     -176   
64     112    
-160   0      
-32    16     
144    112    
96     64     
-64    128    
-48    80     
-16    -16    
48     64     
16     0      
0      128    
0      64     
96     -16    
-32    0      
80     -208   
48     64     
48     -864   
-32    -80    
-16    0      
144    32     
-144   0      
320    208    
-240   -16    
64     144    
240    144    
-256   80     
192    48     
-64    64     
128    32     
-16    -16    
176    224    
160    0      
0      304    
-208   -1072  
144    -240   
-176   -496   
-176   -576   
-80    -320   
112    160    
-80    16     
176    128    
16     96     
-16    80     
32     -352   
-112   -336   
320    320    
-240   -336   
144    -192   
32     -288   
-16    48     
48     -32    
48     192    
-32    192    
96     -80    
0      64     
80     320    
-80    -16    
192    -80    
-96    624    
208    -560   
336    656    
0      320    
144    240    
16     -416   
64     -256   
176    -272   
144    128    
96     336    
112    -80    
0      208    
32     -80    
0      48     
128    -336   
-64    32     
0      -16    
16     0      
0      -512   
-16    192    
240    16     
-80    80     
80     16     
32     96     
-48    64     
48     96     
-112   -224   
-96    -416   
304    368    
16     112    
48     144    
48     -208   
-112   0      
80     -256   
-32    -80    
-96    48     
128    -320   
-16    80     
384    -1280  
-32    -160   
112    -1440  
96     -672   
48     48     
736    -336   
-416   384    
96     112    
-16    96     
-48    384    
448    96     
-112   448    
-48    -96    
144    -848   
64     304    
96     -368   
-128   112    
160    -304   
-240   -304   
336    48     
64     -32    
64     -112   
144    -208   
256    208    
-16    80     
224    -64    
288    352    
16     -128   
128    -320   
544    720    
-144   544    
-240   -96    
224    -336   
-16    -576   
-1264  -112   
384    -352   
64     272    
-272   528    
-64    -176   
-16    -1456  
96     -64    
-128   240    
144    -16    
256    352    
-64    352    
32     -96    
112    -64    
352    480    
-32    64     
-128   -48    
48     -128   
448    -208   
16     96     
96     -320   
288    -16    
-304   -32    
48     -288   
336    448    
-240   480    
-128   -272   
-192   -400   
368    -800   
-96    208    
32     -32    
32     -64    
-112   -272   
112    256    
48     -240   
-64    368    
-432   -1456  
480    784    
-32    576    
-352   -640   
64     -304   
16     384    
96     176    
80     -32    
-112   32     
80     48     
-464   432    
112    -112   
-608   -128   
-208   -544   
128    32     
48     688    
112    -592   
-112   -944   
32     80     
240    528    
-32    32     
-16    64     
96     0      
-176   -32    
208    80     
-160   112    
144    160    
-192   112    
208    448    
48     -16    
-64    -496   
160    736    
80     96     
-160   -112   
-16    -1024  
144    -112   
16     96     
448    528    
-240   304    
224    -16    
-32    -32    
80     128    
-112   -288   
112    160    
-96    -16    
0      -32    
224    240    
-48    -64    
80     464    
-96    -1264  
16     -384   
-96    16     
0      -16    
-144   -16    
32     -112   
128    32     
-80    16     
-96    16     
64     48     
-128   64     
-32    -144   
192    -128   
112    -144   
-128   128    
80     -880   
160    -192   
-288   -240   
240    64     
-240   80     
144    256    
-96    96     
-144   32     
48     48     
48     -64    
112    96     
-80    -80    
336    384    
-496   96     
16     208    
64     48     
-1392  -32    
-128   64     
-16    48     
-32    96     
144    -112   
-96    80     
144    -96    
48     288    
-256   -224   
0      48     
256    -208   
-96    160    
-160   -176   
-288   64     
80     64     
-80    48     
-80    48     
-400   -48    
176    240    
-432   64     
-32    48     
16     -32    
16     112    
-816   -128   
-16    80     
-80    -272   
0      80     
-64    -128   
0      272    
16     0      
32     -80    
64     80     
-112   32     
-48    48     
48     -16    
-80    16     
-240   160    
32     128    
-112   -96    
0      -96    
-240   -176   
144    64     
-64    -48    
-64    -16    
-160   -32    
-16    304    
-112   160    
-208   -32    
-144   16     
0      80     
112    144    
-32    32     
-128   64     
32     208    
192    144    
-48    -16    
112    96     
-64    0      
-192   -112   
-32    -224   
-176   0      
128    96     
-48    48     
0      -48    
-176   -176   
16     32     
-592   -160   
-336   -144   
480    -64    
-80    96     
-80    -208   
0      144    
128    0      
-64    96     
48     80     
-48    80     
80     112    
-176   0      
-192   -16    
80     -48    
160    240    
-128   -64    
-16    112    
-432   32     
112    128    
-96    -320   
-224   -128   
272    112    
-16    256    
32     16     
-160   16     
96     80     
-160   -32    
-16    160    
112    32     
-32    16     
48     32     
-176   160    
-32    -192   
80     112    
48     -16    
160    16     
-64    96     
160    32     
-80    16     
-160   -32    
128    32     
-32    80     
128    144    
48     80     
-224   0      
128    0      
-64    144    
-112   -112   
32     80     
32     64     
64     192    
-48    128    
-96    96     
-16    32     
-48    -48    
320    112    
144    16     
-112   48     
-64    32     
80     112    
-368   -16    
208    32     
-224   80     
-16    80     
-80    112    
64     64     
48     64     
112    96     
-144   144    
64     80     
64     112    
-96    0      
128    48     
-16    128    
144    64     
-112   -48    
112    128    
-128   32     
-80    16     
-16    192    
208    240    
-288   144    
0      -16    
96     80     
-16    16     
-112   -112   
0      -112   
176    400    
176    128    
-128   96     
-96    -16    
-80    16     
80     144    
0      128    
-80    112    
112    80     
-48    80     
112    128    
-16    64     
64     64     
-144   192    
96     176    
-112   -400   
-320   -656   
448    656    
-416   416    
128    -528   
48     256    
16     240    
144    -80    
16     64     
32     96     
-32    48     
32     80     
80     80     
64     48     
-48    96     
48     112    
-112   -32    
144    -48    
-128   -496   
112    384    
-208   -528   
256    592    
16     32     
16     32     
-16    224    
32     -48    
-32    128    
80     -144   
176    128    
-96    80     
224    64     
-384   -16    
32     -256   
-112   -800   
144    64     
0      208    
96     -32    
48     176    
96     144    
-48    96     
0      16     
-144   -256   
336    160    
-144   464    
0      48     
16     160    
-64    16     
16     -192   
64     96     
16     -1280  
0      272    
-64    368    
224    480    
144    352    
-272   64     
240    -64    
-208   32     
64     -96    
-48    80     
208    96     
-288   -64    
272    -64    
-16    240    
208    64     
-144   -432   
96     48     
16     96     
0      80     
-32    80     
-208   -336   
272    -560   
-32    -64    
352    112    
-208   -96    
32     0      
16     48     
160    192    
96     64     
-32    272    
-192   -704   
-80    -64    
240    -304   
-112   -160   
160    32     
128    -16    
-160   176    
272    224    
-208   128    
448    336    
-240   32     
-16    272    
-64    -288   
-64    -112   
80     -64    
-160   -288   
256    -192   
32     -1104  
32     592    
528    96     
96     224    
224    912    
-160   -256   
48     -384   
144    256    
-80    -48    
144    16     
0      304    
128    -48    
16     -48    
-384   -800   
384    32     
128    -432   
-240   288    
144    -2480  
112    128    
-48    -16    
-32    176    
272    -352   
80     400    
-48    208    
-144   384    
560    -96    
-64    336    
-48    32     
16     -368   
176    208    
-144   -256   
704    448    
-624   -1216  
240    -208   
-48    32     
112    -16    
-64    -352   
-304   -464   
368    -192   
160    64     
-96    16     
240    0      
-336   -384   
-48    -816   
144    -112   
-160   64     
160    112    
-224   -288   
400    272    
-176   240    
-112   -64    
96     -48    
176    48     
64     0      
352    -48    
320    464    
-48    128    
-16    256    
-16    -256   
112    -32    
80     16     
320    208    
-256   -176   
112    128    
32     80     
16     80     
-224   -240   
128    256    
48     -48    
-96    48     
48     176    
-16    -192   
48     -112   
80     -336   
-96    160    
144    192    
-64    176    
64     -384   
208    64     
-64    -224   
96     -608   
-16    -160   
-736   -96    
80     -528   
-48    -352   
0      -496   
128    -112   
-128   -2272  
32     -96    
64     96     
48     64     
32     112    
0      128    
160    -48    
-96    -176   
64     -48    
32     80     
-240   -48    
96     -304   
-112   -144   
240    -592   
-80    -224   
192    -432   
32     -96    
80     -800   
96     -320   
32     -64    
128    144    
-208   -32    
0      48     
96     0      
-64    -288   
-208   -288   
32     176    
80     -224   
0      -288   
64     176    
80     -192   
-80    -64    
80     -112   
16     -224   
80     -288   
-32    -48    
304    0      
0      96     
48     -16    
160    -64    
-160   32     
-80    -208   
-448   32     
96     -80    
-64    -16    
144    64     
16     16     
32     -256   
192    -16    
-48    -432   
0      96     
128    64     
0      64     
-144   -80    
48     16     
-144   -128   
-32    -144   
-16    -16    
-32    0      
32     -128   
64     -304   
32     -48    
112    -320   
-144   80     
80     -1104  
-96    80     
240    -128   
0      48     
-288   -176   
176    -128   
-160   16     
32     -16    
-80    32     
-96    48     
-1536  -48    
80     32     
48     0      
304    144    
48     208    
-128   -432   
128    160    
-64    48     
304    -16    
-128   112    
176    112    
-16    -16    
48     -176   
-352   -96    
16     0      
16     144    
48     -96    
-16    -32    
80     -112   
64     128    
80     -816   
64     64     
96     176    
-16    16     
-32    32     
144    32     
-416   -48    
176    -64    
-176   -16    
128    0      
-128   48     
144    48     
0      0      
-80    -272   
16     128    
32     -192   
16     80     
-96    48     
80     -32    
-320   368    
240    208    
-96    -48    
160    192    
-192   -64    
224    32     
-224   48     
272    -144   
-272   96     
144    -96    
96     144    
96     -32    
-32    -32    
128    96     
48     -128   
-384   -64    
208    64     
-96    32     
80     0      
176    288    
-272   80     
0      16     
-80    -48    
-16    96     
-176   -304   
64     48     
-224   -144   
-400   -160   
-144   0      
-192   -32    
-112   80     
-960   96     
48     144    
-176   -48    
-112   32     
64     -80    
-32    32     
-160   -64    
32     16     
-112   -32    
-32    48     
-384   -400   
-208   48     
-16    32     
16     -144   
-128   144    
-192   64     
-320   -32    
-880   -80    
96     16     
-336   -16    
64     -16    
-192   -176   
48     0      
-80    -128   
144    224    
-96    256    
-176   -160   
64     192    
96     32     
-32    208    
-176   -48    
-176   -32    
-240   96     
48     80     
-192   16     
144    32     
-112   -176   
240    64     
-32    0      
-48    80     
-176   -48    
-160   -304   
-80    -80    
0      -48    
-112   -160   
48     64     
-32    16     
-96    -16    
-32    -288   
-544   -144   
-64    32     
-176   -240   
-16    144    
-16    -32    
192    160    
-352   -512   
0      272    
-160   80     
208    -64    
-288   -128   
208    368    
-80    -176   
-224   432    
160    -320   
-368   208    
144    -48    
-64    32     
96     96     
-64    16     
64     -32    
-112   144    
96     352    
-32    -80    
-240   -608   
192    -112   
0      320    
-96    304    
-160   -32    
272    32     
-256   48     
112    64     
-336   16     
64     80     
32     48     
-80    16     
0      32     
0      48     
32     96     
240    144    
-384   32     
-48    -160   
-16    48     
-112   -96    
32     48     
-160   -16    
128    48     
-640   -112   
16     80     
-96    192    
192    112    
-64    112    
-80    16     
112    64     
32     240    
-96    112    
-144   48     
32     -32    
-96    0      
96     112    
-272   -32    
80     48     
-16    -48    
-128   -192   
144    -48    
112    96     
-16    96     
-160   96     
-16    -16    
-64    -48    
-48    32     
240    208    
224    624    
112    448    
-288   592    
160    528    
-80    688    
-144   112    
16     -80    
-128   48     
80     -48    
-96    0      
-32    32     
-16    416    
192    192    
-48    96     
-160   16     
144    0      
-256   32     
176    80     
-144   64     
-48    -64    
-112   -592   
-48    -528   
352    96     
-224   208    
0      64     
-16    16     
-48    96     
96     -32    
-16    -96    
-208   -96    
288    16     
160    64     
64     864    
-32    0      
-64    -320   
32     48     
400    368    
-144   720    
-176   144    
112    -480   
720    320    
-96    592    
-32    0      
240    0      
-112   -16    
224    176    
48     -32    
64     128    
-256   384    
-32    -256   
80     -96    
-128   112    
128    -160   
224    1216   
-192   384    
48     -48    
-80    240    
-80    192    
16     -64    
-16    -16    
-80    -16    
-112   80     
112    368    
-160   16     
16     144    
-48    96     
48     32     
-240   -128   
48     176    
80     48     
-192   -304   
128    -240   
-64    -48    
256    -16    
-16    32     
192    128    
-304   -32    
128    160    
16     80     
-160   80     
176    144    
-144   32     
192    320    
-240   128    
0      80     
96     80     
-112   -80    
16     -16    
224    192    
-288   -128   
112    256    
304    96     
-336   80     
-16    112    
-32    -608   
224    96     
-48    144    
-48    64     
64     48     
-16    -64    
160    -16    
0      -272   
-96    -64    
-16    80     
0      -128   
-32    128    
48     16     
-208   112    
128    48     
0      -1712  
16     -48    
0      32     
128    96     
-80    96     
16     80     
96     128    
48     48     
-192   -176   
128    128    
-16    80     
0      16     
112    256    
-192   -32    
16     80     
80     -208   
32     32     
144    -144   
0      96     
-96    384    
-80    32     
96     272    
224    96     
-288   96     
48     64     
48     64     
112    80     
-32    64     
32     -176   
-160   -64    
0      80     
144    80     
-96    -1392  
32     96     
80     64     
112    160    
-96    48     
80     80     
-48    -48    
-96    0      
16     -112   
-32    0      
-48    -96    
240    -224   
96     224    
192    -160   
32     -16    
64     -64    
112    128    
64     -448   
-288   -160   
352    -96    
-96    16     
192    48     
48     16     
32     64     
64     0      
-48    -224   
112    -80    
224    112    
-80    -96    
176    96     
0      -192   
368    272    
-240   -48    
0      48     
112    -64    
80     64     
32     -16    
16     16     
144    64     
64     -144   
64     -160   
80     -992   
208    48     
16     -64    
96     -16    
32     -96    
304    240    
-256   176    
-48    16     
112    144    
80     0      
64     -128   
96     96     
160    80     
16     -272   
80     144    
96     -176   
432    352    
-320   -80    
-48    176    
576    80     
-64    128    
-80    -1168  
208    80     
-32    32     
128    -96    
16     64     
-96    -384   
-112   -352   
176    64     
128    128    
-112   96     
320    144    
-176   -144   
208    80     
-16    -48    
48     128    
160    -32    
-160   -160   
304    32     
160    -288   
-224   16     
96     -64    
-48    -16    
192    80     
-96    -48    
80     -208   
144    -2368  
-96    -160   
400    352    
-32    -16    
64     -64    
208    48     
0      -272   
-32    16     
32     -416   
64     32     
-320   48     
-32    16     
-16    -32    
112    160    
80     -80    
-16    -400   
80     -176   
32     -368   
208    64     
-64    -160   
48     96     
64     -304   
96     -48    
48     -16    
80     16     
16     32     
96     -96    
-16    -48    
128    -96    
-112   16     
16     -224   
32     128    
32     -256   
144    800    
368    560    
-400   -96    
208    -112   
32     144    
-32    144    
-16    -64    
-464   -336   
160    -224   
-272   16     
64     -112   
-192   -176   
752    528    
-288   416    
-240   -384   
-160   -256   
224    -1488  
-144   128    
48     48     
208    368    
-240   112    
-96    -112   
-112   -80    
224    16     
-16    80     
-224   -32    
112    -48    
64     -176   
320    80     
-208   -432   
400    16     
368    -208   
48     80     
96     -48    
144    -32    
64     32     
32     240    
0      96     
16     96     
144    -96    
-144   -304   
-224   -432   
224    -288   
-16    0      
112    -128   
192    240    
128    -368   
-128   64     
-160   0      
-16    -112   
-64    -64    
16     -112   
64     16     
112    240    
-256   -160   
80     -128   
-64    272    
-320   -176   
256    -672   
224    240    
0      128    
176    -496   
-112   80     
-32    -64    
0      112    
-128   240    
144    -384   
-160   368    
128    256    
-352   -32    
160    -160   
-32    224    
128    192    
176    -160   
-80    -64    
240    240    
-240   -576   
48     -176   
112    288    
-96    -48    
-48    128    
16     -80    
-16    80     
112    32     
272    320    
-192   272    
-32    48     
-64    -256   
96     128    
448    192    
-16    672    
-528   -64    
-288   112    
48     32     
-528   -48    
144    32     
-32    0      
32     0      
-96    32     
-144   32     
80     -64    
-240   -32    
-1456  -176   
-16    96     
-368   -80    
176    -64    
-656   -416   
-240   -240   
224    96     
-176   176    
-80    64     
-32    -80    
-80    -80    
-48    -32    
-64    64     
160    400    
-48    304    
-16    16     
-16    96     
-304   240    
144    192    
-112   -32    
-16    -48    
48     32     
-368   48     
96     64     
64     32     
-80    -96    
-1120  -16    
-80    32     
160    -32    
48     32     
80     96     
-80    144    
16     -64    
-96    128    
0      -96    
0      -80    
-192   -32    
160    -512   
16     -352   
-256   -384   
-96    -448   
224    -96    
-80    208    
-672   -16    
16     144    
-144   -160   
-192   -336   
-96    -400   
144    96     
-80    112    
32     64     
-160   16     
48     64     
-80    48     
-96    0      
48     16     
-32    -496   
112    224    
-624   960    
160    -416   
-176   -16    
-16    528    
64     -224   
-48    112    
96     480    
-112   224    
144    -784   
-240   80     
112    16     
-144   96     
208    64     
-288   160    
80     128    
-112   -48    
0      80     
112    32     
144    736    
-128   -96    
144    304    
128    544    
-32    320    
32     256    
-112   -160   
80     -240   
-160   -480   
-80    -224   
-336   -320   
-176   -464   
176    -720   
-32    80     
-192   224    
-144   272    
80     272    
-96    144    
16     128    
-96    -208   
-368   -176   
496    -256   
-320   -128   
288    48     
-112   80     
64     64     
-96    96     
-64    64     
160    112    
-720   -144   
528    320    
-128   80     
320    -32    
128    144    
80     48     
32     16     
32     48     
-96    -112   
288    208    
-112   -48    
192    32     
64     128    
-32    -16    
48     128    
-336   -48    
-112   32     
192    128    
-16    16     
0      176    
-32    -176   
272    256    
-288   -16    
-16    96     
96     64     
32     32     
-224   -64    
32     16     
80     -112   
48     144    
16     64     
-16    16     
-96    -144   
144    80     
112    96     
-256   80     
-64    80     
-224   112    
16     -16    
-64    144    
-16    -48    
-80    48     
-16    128    
0      48     
16     144    
80     176    
-80    96     
64     16     
-96    16     
112    176    
32     32     
-16    16     
144    -16    
16     112    
112    0      
-80    64     
128    144    
-224   96     
0      144    
176    176    
-64    128    
-112   -16    
16     64     
-32    -32    
-16    128    
128    144    
-112   32     
48     48     
-160   0      
0      96     
96     112    
-16    -16    
-16    128    
-80    -48    
208    32     
-144   64     
112    96     
0      160    
-16    96     
-80    -16    
32     96     
48     128    
112    64     
-16    96     
48     64     
80     160    
16     32     
48     96     
32     112    
-96    160    
32     -240   
-128   -64    
224    112    
-192   128    
256    64     
-32    16     
-192   -272   
128    -160   
48     -32    
-160   48     
304    96     
-208   -128   
208    208    
48     80     
48     64     
80     112    
0      80     
64     208    
96     80     
-80    160    
160    144    
-144   208    
144    16     
-176   192    
0      -32    
48     112    
-96    -48    
96     -144   
-96    160    
0      -2336  
-16    208    
32     32     
160    176    
112    64     
96     48     
80     64     
96     64     
-16    0      
96     80     
16     160    
-64    -160   
240    -304   
-16    -16    
240    96     
-176   -800   
176    144    
240    96     
-128   224    
144    96     
-176   80     
0      16     
-96    -16    
112    -480   
64     96     
-144   -96    
272    16     
176    144    
-112   -176   
0      112    
-208   -576   
352    128    
48     -1232  
-16    0      
96     80     
48     128    
-96    -112   
176    80     
-208   -208   
224    96     
0      -32    
-16    -272   
-32    -80    
144    -192   
192    128    
-48    -272   
0      96     
80     -1488  
64     80     
-16    -176   
272    144    
-32    32     
144    144    
-144   -192   
192    80     
144    608    
176    0      
-144   176    
112    304    
144    320    
80     32     
80     16     
-64    -320   
48     64     
96     -320   
80     96     
48     48     
0      96     
32     224    
16     96     
-80    -96    
32     -80    
-208   -704   
-352   -944   
224    -208   
64     -464   
32     32     
-144   -288   
80     -16    
16     -96    
-112   -272   
96     -528   
224    -80    
128    80     
-208   -80    
96     -112   
80     -16    
-192   96     
64     -432   
-80    224    
96     -48    
16     208    
-112   16     
-16    32     
48     304    
64     144    
64     16     
-112   0      
160    -96    
32     224    
288    80     
-48    0      
192    144    
-176   -32    
80     0      
-112   -160   
192    48     
48     416    
-64    -352   
-32    -576   
176    640    
144    160    
-256   -720   
400    64     
-96    32     
160    -1472  
192    -112   
80     -1584  
208    160    
-32    32     
-32    -544   
-16    272    
208    48     
0      -512   
0      128    
16     32     
-160   -192   
-16    -112   
176    160    
-240   -32    
16     -272   
80     144    
304    -176   
-112   -32    
192    -416   
64     -80    
16     80     
16     112    
128    -384   
256    96     
96     -128   
-272   -688   
224    -160   
128    464    
-176   224    
144    -64    
0      -64    
144    64     
32     256    
352    -880   
-224   -416   
-128   -1104  
80     -576   
32     -32    
-400   -80    
80     -448   
16     128    
-64    112    
144    -80    
-48    176    
-48    -128   
144    240    
-32    128    
128    -80    
112    -368   
-128   -208   
48     -416   
192    -16    
-144   -96    
32     0      
0      -64    
32     64     
0      80     
48     0      
-288   -32    
32     -32    
-432   0      
-96    -160   
144    80     
-16    -96    
112    192    
144    -400   
-64    -288   
0      -736   
-16    112    
160    -64    
-16    80     
64     528    
128    576    
32     320    
-288   -224   
64     48     
-48    176    
-640   176    
80     -272   
-192   -48    
64     -272   
-16    80     
64     -944   
64     -176   
64     -112   
-176   -512   
-48    -112   
16     -464   
64     -176   
48     224    
-48    0      
128    176    
-752   48     
464    256    
-576   -688   
80     -1040  
112    256    
32     96     
32     -144   
96     160    
-112   -144   
-48    48     
48     -112   
-112   -192   
-80    -32    
-176   -640   
272    400    
-272   -96    
32     32     
0      128    
176    -48    
-16    192    
32     -320   
80     -96    
-208   48     
112    176    
0      -368   
176    -816   
0      -96    
96     -208   
-160   -96    
240    288    
-16    224    
0      16     
272    144    
240    -352   
32     32     
80     -256   
176    80     
-32    64     
-32    0      
-160   -32    
144    -48    
-224   64     
-96    -320   
368    160    
-240   0      
96     -208   
-48    -144   
224    144    
-1776  -288   
112    176    
-736   -96    
-144   96     
-160   -96    
-736   -144   
0      224    
-896   64     
-80    -112   
-64    0      
112    144    
16     32     
-112   0      
-656   -160   
32     112    
-368   -352   
256    -336   
-16    112    
-80    0      
-128   64     
-320   -80    
64     0      
-384   48     
-144   144    
-1232  0      
-208   0      
112    -128   
48     48     
-160   32     
96     96     
-32    16     
256    224    
-288   -80    
32     96     
-64    -96    
-160   -208   
-160   48     
-352   112    
-32    48     
-928   -144   
48     -96    
80     -192   
320    16     
128    32     
176    304    
-432   -448   
64     -400   
48     16     
256    80     
112    256    
-32    64     
176    144    
-208   144    
16     160    
32     -64    
96     64     
-576   -160   
112    176    
-32    0      
-304   160    
-128   0      
-96    224    
224    96     
-176   16     
64     160    
-192   -32    
-112   -96    
112    -64    
48     144    
160    48     
-176   80     
-288   -96    
112    128    
-112   -64    
-80    -96    
304    -16    
32     96     
144    32     
-144   16     
48     32     
-112   -80    
16     16     
16     -96    
-16    224    
64     -16    
-240   -16    
-576   -80    
-80    64     
0      16     
240    224    
16     64     
160    144    
-320   -192   
-16    112    
384    80     
-208   -416   
-112   16     
176    144    
-112   0      
-240   0      
176    112    
-96    -16    
-144   -32    
272    -48    
208    304    
-224   80     
-256   -320   
128    -48    
32     80     
48     160    
-48    144    
64     96     
-320   0      
16     80     
-128   192    
80     48     
-144   -144   
112    32     
-144   16     
-48    0      
-64    224    
432    304    
-336   208    
112    144    
128    96     
-432   48     
0      0      
-80    -16    
32     16     
-96    32     
0      80     
48     192    
96     256    
-32    80     
-48    -16    
-64    -176   
112    16     
16     32     
-16    32     
48     32     
0      80     
96     144    
-80    112    
-16    48     
-80    -80    
96     48     
-48    16     
48     80     
144    48     
64     112    
-32    160    
80     112    
160    128    
-96    32     
-112   -96    
64     -208   
96     16     
-16    -16    
-16    80     
-64    -96    
-48    0      
0      32     
-64    16     
256    128    
-176   128    
64     16     
80     32     
-112   0      
0      544    
112    160    
-176   -80    
64     -16    
-400   -176   
96     48     
-160   288    
208    272    
-48    16     
112    112    
-16    32     
0      -160   
32     -112   
32     48     
0      272    
-112   -288   
-80    -112   
128    560    
-320   -160   
16     16     
-128   192    
48     48     
144    208    
-80    176    
-48    64     
16     80     
80     32     
-192   48     
224    -576   
80     544    
80     208    
0      -208   
-96    448    
64     32     
-192   -32    
256    176    
-368   -272   
48     32     
64     304    
-144   -48    
48     80     
-32    32     
112    112    
-48    -80    
-96    -112   
0      288    
-64    -16    
16     144    
80     160    
0      -144   
48     16     
64     -208   
336    352    
-64    -48    
272    -304   
80     -32    
336    256    
-96    304    
144    -144   
128    256    
-320   32     
160    48     
-64    128    
528    -96    
-160   384    
48     160    
112    0      
16     -64    
176    -96    
32     -832   
-96    240    
-48    96     
-192   112    
160    -432   
-48    -16    
96     144    
-272   -16    
-64    304    
-144   -304   
-144   -32    
-32    112    
-80    96     
-16    -144   
-144   192    
-272   -1200  
160    608    
-368   320    
32     -848   
448    432    
-384   592    
-48    -672   
-32    16     
192    128    
256    800    
-336   -80    
448    -384   
-112   528    
-144   -112   
-176   -208   
352    -1216  
-320   240    
-64    -2448  
272    128    
-48    336    
64     80     
192    176    
176    128    
-320   112    
384    48     
-96    64     
128    16     
48     240    
-16    -160   
-144   16     
96     -288   
-112   -48    
112    304    
-32    -32    
-32    -512   
16     160    
32     -48    
-48    -288   
96     -16    
224    416    
-320   64     
160    -624   
48     -384   
-48    832    
192    -160   
32     -32    
16     256    
-96    -1168  
320    528    
48     176    
-336   -320   
112    -752   
16     -480   
192    304    
-64    1056   
96     112    
32     -32    
112    48     
0      0      
-64    64     
-48    -128   
144    96     
-112   -160   
96     96     
-32    -64    
112    80     
-64    80     
80     112    
-224   48     
528    -16    
-240   -272   
16     288    
-32    80     
-64    -160   
16     -96    
80     -112   
-80    80     
192    0      
64     432    
112    -416   
48     -48    
32     -16    
160    240    
-16    48     
112    48     
48     384    
-16    -176   
128    -352   
224    128    
-80    48     
-64    -192   
112    16     
80     -16    
-160   -416   
-16    -256   
96     -2064  
0      304    
176    176    
16     -112   
112    -512   
288    -224   
-144   -336   
144    -848   
-80    -352   
224    -112   
-16    -64    
272    112    
32     48     
160    -1200  
144    144    
-160   -448   
480    320    
-240   -128   
112    -160   
48     128    
80     -352   
112    80     
0      -288   
224    80     
-48    -576   
16     -144   
176    176    
0      -80    
144    48     
112    80     
192    -32    
32     80     
-192   -96    
144    -64    
-256   -64    
192    16     
-96    -128   
-80    -288   
208    -48    
-96    -240   
80     -128   
0      -672   
96     -16    
64     64     
16     16     
112    -48    
0      96     
-64    192    
144    -128   
-400   64     
128    112    
-576   32     
-112   -240   
272    -64    
-80    -256   
192    -16    
0      -208   
272    80     
32     -112   
112    0      
112    -96    
144    -32    
-48    32     
16     -16    
-64    64     
-80    -192   
-160   -48    
368    32     
-496   -32    
320    48     
-400   -128   
-240   -1104  
-48    16     
-48    -1072  
32     368    
80     80     
96     -288   
-96    64     
16     -464   
16     -32    
224    -368   
-144   -16    
256    16     
-992   -160   
144    -144   
-80    112    
144    -576   
160    240    
96     -352   
-48    64     
-16    -64    
48     64     
0      -48    
-112   -112   
480    256    
80     176    
-512   -64    
112    208    
-1024  192    
64     32     
-192   16     
80     -240   
48     -96    
96     -432   
176    64     
32     -16    
-64    -32    
160    -112   
80     -160   
-64    96     
80     48     
-16    16     
-112   -160   
144    48     
144    0      
-64    96     
-64    -304   
512    96     
-96    -448   
144    -192   
-464   -16    
176    64     
32     96     
-112   80     
-80    -16    
128    32     
16     96     
16     -96    
-464   32     
32     32     
48     48     
112    -48    
-160   192    
32     -160   
64     64     
-112   -80    
-48    -48    
-32    0      
256    32     
-208   16     
-16    32     
-32    16     
-16    112    
16     240    
-928   112    
-176   64     
-736   -384   
16     32     
112    160    
-720   96     
96     32     
-752   0      
-32    -64    
-368   -128   
-16    -32    
80     32     
48     64     
224    176    
-32    80     
-176   -192   
-32    144    
-112   -64    
-160   0      
80     64     
-176   -16    
-256   -240   
-64    -304   
-48    64     
-192   80     
-160   16     
-944   0      
160    48     
64     0      
32     0      
-16    -160   
48     48     
-16    -80    
96     64     
-80    -80    
16     16     
-192   -32    
-48    32     
-144   16     
128    128    
-32    288    
-272   112    
-96    0      
-32    -64    
160    368    
272    272    
-176   736    
-64    256    
-16    64     
64     0      
-96    -304   
160    224    
-224   -192   
48     0      
-64    224    
-96    48     
-624   -96    
-64    -208   
-1248  112    
96     64     
-32    -480   
144    -176   
-16    0      
-16    32     
-96    432    
80     208    
-80    -16    
-48    0      
-144   -192   
-16    64     
80     432    
-64    208    
-48    -144   
-560   -240   
224    144    
-272   -160   
304    64     
-32    80     
-64    -16    
80     32     
16     112    
16     368    
0      -224   
80     352    
-48    -288   
96     32     
-224   -128   
80     112    
-192   128    
144    96     
-128   272    
-240   240    
128    -240   
-16    32     
48     128    
-80    144    
48     80     
208    272    
-208   144    
-160   16     
-96    -528   
-288   -288   
416    -272   
-272   48     
144    560    
-112   -112   
-32    128    
-32    160    
-208   -192   
0      176    
32     352    
-368   -160   
32     -16    
112    48     
-192   -80    
80     -32    
-208   -64    
304    272    
-160   288    
96     176    
-304   32     
-160   96     
336    128    
-144   304    
-304   -224   
336    -48    
-80    192    
-160   128    
144    240    
-192   -96    
256    384    
-256   256    
-32    -528   
32     112    
96     160    
-224   -224   
96     0      
48     176    
320    96     
-320   240    
64     144    
-80    32     
-208   -496   
160    -176   
-256   80     
112    64     
-80    96     
96     256    
-224   -80    
80     64     
208    32     
48     256    
-144   176    
96     -96    
-112   0      
-80    -144   
352    128    
-160   736    
-192   -1312  
416    -128   
-64    64     
-96    624    
16     224    
-272   160    
208    -368   
-192   192    
-80    384    
-16    -336   
-128   416    
208    -272   
-192   784    
-32    -608   
-16    1120   
0      -1024  
16     128    
-80    48     
-192   -80    
-16    -752   
240    144    
240    864    
-256   112    
112    -432   
-16    -80    
32     0      
16     32     
0      0      
16     96     
48     -64    
560    592    
-464   -272   
176    32     
-96    16     
272    64     
-144   -480   
400    320    
-176   0      
-80    -144   
-64    288    
176    368    
-80    96     
16     368    
96     -144   
-208   -96    
64     336    
-16    -48    
96     112    
-160   32     
32     -448   
128    240    
-416   -768   
224    48     
160    560    
-128   -288   
128    160    
96     32     
-80    -144   
192    80     
-16    -160   
144    80     
64     128    
-144   64     
-48    16     
0      -336   
32     112    
-32    -64    
48     96     
32     80     
-64    -160   
-144   -80    
208    224    
128    16     
-128   304    
32     -224   
-112   -64    
80     -480   
-64    96     
224    128    
-160   -384   
0      96     
256    -1424  
-16    192    
112    160    
-240   32     
-112   96     
256    96     
32     64     
96     144    
-80    0      
32     160    
-48    16     
64     80     
192    272    
-96    48     
-16    -16    
160    -272   
48     16     
144    -96    
-16    64     
160    224    
-32    -16    
-32    16     
96     80     
160    352    
-256   48     
128    80     
80     32     
112    144    
-16    -96    
96     32     
96     -160   
-352   64     
224    -272   
-160   288    
64     -128   
128    16     
-48    -176   
80     64     
144    -16    
64     32     
-16    -64    
256    -16    
48     224    
32     -112   
64     112    
80     -112   
128    176    
32     -272   
80     64     
48     16     
-16    0      
-48    112    
160    160    
-80    -16    
0      112    
64     96     
112    -256   
-32    96     
144    -112   
128    208    
144    -80    
48     176    
48     -560   
32     48     
48     -64    
192    -48    
208    80     
144    160    
144    256    
80     -16    
-256   368    
144    -416   
0      208    
16     -176   
-224   32     
-32    -512   
176    160    
-144   64     
80     112    
-192   -80    
192    -16    
64     -48    
16     112    
112    128    
-480   16     
176    384    
-64    32     
-32    128    
128    -128   
-304   -64    
-112   -416   
-48    64     
-64    112    
-112   80     
0      -144   
-368   -224   
-32    -272   
-144   -112   
32     -368   
-272   16     
-192   -624   
96     -448   
-240   -1104  
608    -48    
240    -64    
16     -144   
384    240    
240    -48    
-32    -1984  
64     16     
448    -64    
-320   96     
192    48     
-128   -64    
272    -48    
0      -320   
-16    -112   
96     -1056  
-96    -128   
384    -208   
208    -64    
160    128    
-16    -160   
-80    96     
240    144    
144    112    
176    -16    
80     0      
-16    -240   
-144   -176   
128    -144   
208    48     
192    112    
-240   -16    
112    -688   
144    -112   
160    544    
-160   -192   
144    -96    
-48    80     
128    -32    
-64    -16    
-80    -112   
208    16     
-80    -32    
32     64     
128    -64    
0      -96    
16     -192   
64     -160   
160    -64    
-16    -48    
0      -16    
144    16     
192    128    
32     16     
-48    -128   
-144   -48    
0      -144   
-16    48     
176    -16    
-800   0      
80     -224   
256    80     
32     -208   
-32    48     
96     -192   
32     96     
0      0      
16     48     
176    176    
-48    0      
-144   16     
112    0      
16     288    
-80    -96    
-752   -16    
-144   -128   
64     -64    
16     -144   
80     0      
64     -128   
208    96     
48     -272   
16     48     
-48    32     
80     80     
-96    112    
240    -48    
0      96     
160    32     
-640   48     
352    -240   
-496   144    
272    640    
-48    -144   
192    -288   
-80    192    
144    -256   
-64    -144   
80     -96    
112    96     
32     -80    
-64    -208   
-96    -112   
-208   160    
144    -48    
-224   -80    
0      -160   
-48    0      
16     112    
32     416    
-80    -496   
64     -464   
-80    16     
-64    -240   
96     112    
-688   16     
0      96     
-96    -240   
-64    -144   
-16    448    
208    1024   
-304   736    
-112   -512   
-96    -256   
-32    -304   
0      -16    
128    -384   
96     48     
-144   -16    
0      32     
-16    -48    
64     48     
-64    -80    
-32    48     
-112   16     
-32    -96    
-32    64     
80     -32    
48     432    
-320   -16    
-64    48     
-32    160    
-1328  -16    
-160   48     
-160   96     
272    416    
-288   224    
-48    80     
160    -160   
-64    720    
432    -16    
-720   -528   
-128   -624   
-256   -96    
-272   -544   
-48    -192   
176    208    
-16    176    
-16    144    
160    224    
-208   368    
-1024  256    
-240   96     
192    -96    
96     -224   
-208   144    
-112   176    
256    64     
-224   160    
-160   -576   
112    16     
80     608    
128    608    
-112   240    
-192   64     
16     -144   
32     224    
224    48     
-752   -352   
96     -176   
0      192    
144    432    
160    96     
-128   -96    
368    304    
-256   288    
-144   -464   
-16    96     
-304   -16    
176    80     
80     352    
16     464    
-32    -240   
-848   160    
-64    -144   
16     -16    
0      368    
128    176    
-224   -208   
96     128    
-224   -368   
48     -656   
-32    96     
96     240    
128    192    
16     -64    
16     240    
-48    320    
-736   -480   
192    832    
-1152  -464   
64     304    
0      16     
224    48     
16     -208   
112    -16    
-144   -192   
224    320    
160    192    
-176   -624   
176    -176   
-96    416    
-128   80     
112    -96    
-128   0      
-176   -32    
304    -192   
48     -192   
64     -144   
-304   -16    
176    -112   
32     -160   
-48    -128   
0      -256   
-64    -144   
-48    160    
-176   -112   
-208   -144   
32     -80    
-80    192    
-560   -112   
-32    64     
144    -176   
-48    80     
80     224    
-112   400    
-112   368    
192    304    
16     256    
-112   96     
-80    224    
-144   -576   
-144   -16    
-64    -240   
0      288    
-16    -48    
64     128    
-80    112    
176    384    
-32    272    
0      368    
320    288    
-304   80     
16     144    
-32    -64    
-32    64     
128    64     
-144   -272   
-144   -176   
-32    -80    
-64    224    
16     80     
16     64     
-48    0      
-64    -128   
-48    32     
0      -16    
48     -32    
48     -96    
-16    80     
112    32     
-256   64     
80     80     
-176   -32    
112    192    
-80    160    
-192   -16    
32     64     
48     -96    
32     80     
224    192    
-112   96     
32     64     
96     176    
-272   -96    
-112   -16    
224    256    
-48    112    
-192   48     
256    400    
-400   -96    
-144   48     
208    32     
-64    -64    
-16    -32    
48     64     
128    0      
-32    32     
0      0      
32     96     
64     64     
-64    16     
80     144    
-144   48     
0      144    
64     128    
0      32     
48     240    
-48    96     
-16    0      
144    0      
-96    0      
0      80     
-48    48     
112    144    
-80    64     
-48    96     
64     0      
-96    -48    
336    144    
-144   64     
0      80     
16     160    
-32    32     
240    272    
-128   432    
16     368    
32     -112   
-112   -512   
-128   -176   
128    352    
-144   256    
48     272    
80     64     
96     -416   
48     112    
32     32     
-112   176    
208    128    
-96    112    
-144   48     
176    48     
64     144    
96     32     
-208   -48    
240    112    
0      80     
144    176    
32     48     
-240   -320   
256    224    
-64    80     
64     -16    
32     -96    
96     -16    
-144   -448   
64     -176   
96     64     
-80    64     
16     336    
288    -80    
-16    64     
288    144    
16     0      
96     -1088  
64     80     
-32    64     
64     128    
16     96     
400    400    
-592   112    
192    160    
-16    128    
96     112    
-64    -16    
96     64     
16     -80    
128    144    
32     96     
-96    -368   
64     224    
208    -1200  
0      64     
64     80     
32     32     
-192   32     
192    -32    
192    -192   
32     96     
64     -256   
-80    288    
352    48     
-64    -64    
192    144    
-112   48     
240    112    
-32    -384   
272    -32    
-304   64     
192    16     
112    -48    
-48    96     
192    16     
-144   144    
-80    -80    
16     112    
224    96     
-16    -32    
48     64     
80     48     
64     128    
-64    -480   
-32    80     
16     -880   
-48    48     
256    224    
48     32     
-64    16     
16     64     
64     -32    
0      80     
224    144    
-144   -32    
112    144    
-16    -112   
-32    208    
224    64     
224    128    
16     -240   
64     80     
128    48     
-144   128    
-208   -176   
16     32     
0      -48    
-64    -240   
16     64     
-48    -96    
-48    -48    
-32    -96    
144    16     
-112   -224   
-48    96     
192    -192   
-32    -16    
128    -64    
16     160    
224    656    
64     368    
96     272    
-80    -112   
-48    192    
-16    -528   
-16    160    
48     -80    
144    208    
176    432    
-256   -176   
80     -352   
112    -112   
64     144    
80     736    
-240   -624   
336    32     
-272   -16    
80     -128   
0      112    
-112   -64    
384    144    
-144   -128   
96     48     
0      -288   
64     96     
16     -272   
176    176    
-48    320    
16     16     
272    160    
176    -944   
-160   -688   
32     48     
112    -128   
64     32     
128    -1952  
48     -80    
80     496    
0      -80    
128    112    
128    160    
-48    -208   
80     352    
80     -256   
128    48     
-32    96     
32     -160   
32     -16    
32     -368   
-32    -80    
64     -608   
-112   -16    
112    -704   
-80    -64    
96     -96    
-16    -16    
64     48     
-16    80     
112    -16    
-128   64     
-16    768    
48     976    
-1248  256    
208    176    
160    528    
64     304    
96     -112   
0      -336   
144    -112   
16     -192   
112    144    
0      -112   
192    176    
-240   64     
144    0      
-224   -48    
112    -208   
-256   48     
224    -96    
-80    448    
192    320    
-224   -160   
16     -736   
-80    16     
224    -736   
-320   96     
0      64     
16     -32    
112    -176   
880    640    
-560   672    
-176   -144   
-224   -96    
96     80     
-1280  -256   
-64    -336   
-96    -304   
-192   -848   
-80    -160   
-224   -1264  
80     736    
368    576    
-272   224    
-240   -448   
128    -160   
-256   192    
-192   -160   
112    -144   
-128   816    
-48    48     
-192   -768   
320    -784   
32     256    
-160   -16    
32     -48    
-32    144    
-16    96     
96     80     
80     -64    
608    416    
-16    880    
-128   -32    
-144   -656   
176    -96    
-48    128    
-32    -496   
-176   192    
48     0      
112    -208   
64     -640   
-272   -288   
160    -1616  
112    1472   
96     272    
-128   -192   
-336   -160   
-48    160    
-432   176    
176    432    
-368   -144   
-160   -432   
-144   -192   
0      -256   
32     0      
64     -320   
-128   240    
288    -512   
80     -16    
-288   -80    
208    80     
-160   464    
176    208    
-16    224    
32     96     
-32    80     
160    -32    
-816   64     
208    -112   
-48    80     
176    -96    
32     32     
-144   -80    
-304   -208   
16     -32    
64     -128   
-96    96     
496    208    
-240   208    
-32    0      
-80    -64    
32     -176   
144    -80    
-352   16     
160    128    
-208   -48    
224    192    
-240   16     
-1168  -16    
64     112    
-880   -96    
240    192    
-704   32     
-176   -96    
112    -80    
16     -16    
-640   -368   
16     48     
-176   -80    
-64    224    
-192   -80    
-256   0      
-112   16     
-144   112    
0      -32    
-192   -80    
-64    -16    
-272   96     
-224   16     
112    48     
0      16     
-176   -112   
208    192    
48     -112   
-112   32     
0      -128   
-112   32     
0      96     
-16    240    
-128   16     
-128   32     
112    240    
-512   -48    
-16    0      
-656   64     
-112   -32    
-48    -304   
16     80     
-96    -192   
32     256    
32     64     
-48    32     
-48    80     
-80    -16    
-48    16     
-144   176    
0      16     
-256   -48    
32     -32    
-144   -16    
-16    240    
-240   -176   
112    16     
-112   -32    
176    64     
-128   -64    
16     48     
192    144    
-160   224    
-160   128    
-16    128    
144    0      
-208   16     
32     48     
-320   -48    
16     96     
-512   0      
-48    -32    
-48    -80    
16     64     
0      112    
-128   0      
208    176    
-144   128    
-48    128    
160    48     
-32    0      
-128   16     
-80    48     
32     96     
-176   176    
-256   432    
80     112    
-48    -144   
96     16     
-32    48     
-48    -64    
32     16     
240    128    
-272   32     
16     32     
-256   -16    
112    80     
-32    176    
-256   48     
192    272    
-688   16     
-64    96     
112    48     
-64    64     
32     240    
192    112    
-48    -96    
-80    -48    
48     16     
128    48     
-32    80     
-64    48     
48     128    
-112   80     
16     176    
64     -32    
-144   -48    
304    96     
0      96     
80     -16    
-128   0      
0      64     
-80    16     
96     128    
-48    48     
-112   16     
0      0      
-48    128    
-32    -112   
0      128    
-64    0      
-32    320    
64     64     
-48    -16    
208    48     
-80    -176   
32     240    
-48    112    
16     -96    
-16    32     
80     112    
-144   -16    
-48    112    
0      -32    
-48    64     
-112   -352   
-192   -208   
240    80     
-128   144    
-96    16     
-32    -48    
96     -64    
32     96     
48     80     
32     112    
32     64     
-80    -64    
128    96     
64     96     
80     32     
-16    112    
144    176    
48     0      
-96    96     
96     224    
-144   -80    
64     128    
128    112    
-176   0      
-112   -16    
352    208    
-160   32     
400    176    
-304   0      
192    208    
272    160    
-128   96     
0      112    
160    512    
336    240    
-368   -144   
-80    -16    
-32    -320   
48     -16    
-32    48     
-16    64     
-64    16     
32     64     
-144   -144   
128    96     
-128   -48    
128    -32    
80     112    
256    128    
-160   64     
288    208    
-96    96     
16     144    
48     48     
-64    208    
256    304    
-368   64     
224    48     
48     -64    
32     -624   
144    -112   
-160   -384   
-80    -192   
128    0      
32     464    
0      416    
-208   -160   
-80    -48    
64     48     
-256   16     
144    -64    
-96    256    
64     192    
112    176    
-64    -544   
144    144    
-128   -48    
16     112    
32     0      
-80    432    
80     -96    
-96    0      
32     48     
80     -16    
-96    0      
-64    96     
144    -368   
112    128    
96     304    
-96    -464   
320    144    
-224   432    
64     80     
-64    144    
112    64     
-16    48     
-48    96     
-48    16     
64     80     
32     16     
128    160    
-32    48     
48     -128   
16     96     
0      -48    
176    0      
-48    -400   
-16    96     
112    -128   
-64    -208   
112    208    
32     128    
16     80     
48     160    
16     64     
-16    16     
-64    -80    
-128   -112   
-32    48     
48     -208   
64     64     
-64    -480   
192    112    
-80    32     
112    144    
16     16     
64     96     
96     224    
112    -112   
144    176    
192    368    
-192   160    
112    -160   
-128   128    
80     -112   
32     32     
-160   -816   
48     -48    
-192   -816   
256    -512   
0      -256   
128    288    
-368   -144   
160    -288   
0      80     
0      112    
144    64     
16     64     
96     160    
-32    16     
144    144    
-16    -224   
48     80     
-32    0      
144    128    
-48    -16    
48     112    
0      -176   
-192   -192   
-160   -544   
80     -32    
144    160    
-32    -336   
80     176    
32     160    
112    32     
128    -176   
64     288    
208    -224   
368    1616   
-640   -144   
-16    -992   
16     368    
-112   224    
-32    -48    
32     80     
64     -16    
64     -128   
-240   112    
192    -368   
144    80     
-96    -96    
-48    112    
16     -496   
-32    368    
384    528    
-240   -160   
-96    -16    
128    -1776  
-80    -16    
192    240    
-64    208    
288    208    
-32    272    
-32    0      
-16    0      
192    -16    
112    112    
-80    -448   
-48    240    
288    752    
-208   16     
32     48     
-528   -96    
48     224    
208    32     
0      -144   
-32    -112   
336    -1184  
-48    0      
560    736    
-576   192    
128    -64    
32     -80    
208    -32    
-176   -160   
336    -272   
-544   -272   
304    -112   
48     -128   
-128   160    
80     -16    
-256   -144   
224    -288   
240    256    
-112   16     
304    128    
-16    -144   
336    208    
-192   -128   
192    128    
128    -144   
64     -176   
32     -16    
112    0      
176    -80    
64     -112   
112    64     
-48    0      
0      144    
192    0      
352    0      
-320   -1296  
112    32     
64     32     
0      -96    
64     32     
272    -16    
-240   -96    
208    -96    
-624   -32    
176    -64    
-112   -96    
96     -32    
32     112    
-176   -560   
-176   -144   
0      -1504  
-96    -160   
192    -144   
-16    112    
64     0      
128    -16    
32     160    
-80    80     
-144   -32    
80     -64    
-192   64     
144    -96    
-48    -48    
144    -48    
80     64     
0      -368   
80     128    
160    -16    
32     48     
16     -80    
144    -176   
144    32     
-112   -160   
-48    48     
0      32     
-448   -64    
0      -64    
-512   32     
-64    -160   
0      96     
144    -240   
-288   32     
240    -1808  
-112   -32    
32     64     
64     16     
-144   48     
0      -112   
224    -64    
96     -240   
-464   0      
160    0      
-352   16     
96     -224   
0      144    
-32    -304   
240    176    
-352   -2112  
224    16     
-384   112    
272    16     
-416   -112   
256    -32    
-128   -64    
0      -16    
16     112    
-192   64     
336    192    
-160   -96    
-16    96     
-64    -336   
176    -32    
-160   64     
64     32     
-176   80     
-64    -224   
-112   -16    
64     -64    
112    96     
128    80     
-48    -32    
16     0      
-80    0      
32     -208   
80     128    
-368   -112   
32     144    
64     80     
-224   -96    
-176   -32    
-464   -48    
192    -80    
48     96     
-128   -32    
32     80     
-32    -144   
-416   -176   
48     64     
-592   -112   
32     96     
-32    -32    
-336   -48    
-160   144    
80     16     
16     32     
-368   32     
0      0      
-176   -112   
-224   -80    
128    -256   
-112   0      
-272   -16    
-144   80     
96     -16    
32     128    
-80    -128   
-304   -32    
16     -96    
-16    -32    
64     -48    
-48    48     
-112   -16    
-384   48     
-32    48     
-16    -64    
16     -48    
64     -32    
240    208    
0      -112   
48     176    
-128   -64    
-96    16     
-16    80     
-48    32     
48     48     
-224   16     
-48    32     
-400   256    
48     176    
-1104  96     
-64    -64    
80     -16    
-128   112    
-64    -176   
48     48     
16     48     
0      -32    
96     112    
-208   64     
-96    0      
-240   32     
592    656    
-288   960    
-288   304    
-272   352    
112    416    
-192   -416   
-96    -384   
320    -80    
-208   192    
208    176    
-400   80     
96     32     
-128   -80    
112    64     
-160   -16    
64     176    
16     208    
-16    0      
-288   0      
-80    112    
-1296  -256   
176    -224   
-32    -192   
448    176    
-192   48     
128    224    
-96    64     
96     80     
-160   -64    
80     16     
-144   16     
-96    304    
80     272    
-112   144    
-112   128    
-32    16     
224    144    
-256   16     
-48    -64    
0      -544   
96     -240   
160    -48    
192    128    
80     144    
-112   32     
128    128    
-208   192    
-32    0      
-160   32     
224    -64    
-352   -48    
176    -464   
112    192    
-144   -160   
96     96     
-144   -288   
-48    -96    
144    160    
-96    48     
-32    64     
-48    96     
80     48     
16     96     
-64    0      
-32    16     
-240   -288   
208    496    
-352   -496   
304    -208   
-128   352    
-16    144    
112    240    
144    -144   
-176   64     
-160   -128   
64     64     
-80    -128   
64     48     
-160   208    
16     320    
-208   80     
-144   -16    
64     -80    
16     96     
48     -32    
48     128    
32     256    
16     512    
-128   -128   
0      -624   
-64    -32    
160    -48    
-128   288    
112    -16    
0      16     
-32    192    
80     32     
0      80     
-144   -48    
96     96     
-16    80     
-32    96     
32     16     
96     80     
-80    16     
-16    32     
-144   96     
272    304    
-80    224    
160    448    
192    432    
-144   96     
96     32     
-96    -80    
96     -16    
16     0      
144    464    
32     64     
-144   16     
112    32     
-48    160    
-32    128    
16     80     
-80    16     
64     80     
32     96     
-32    -80    
48     96     
64     0      
-64    -112   
-96    -464   
224    -272   
112    384    
80     208    
16     96     
144    160    
160    160    
-96    224    
-32    -128   
-384   -912   
-112   -1232  
112    -672   
-128   -560   
352    -32    
-32    272    
160    288    
-48    32     
32     -96    
192    80     
-32    16     
64     64     
-352   -400   
80     -336   
96     256    
-32    -1520  
192    48     
0      192    
-80    -16    
-64    -1216  
512    672    
-144   336    
32     -416   
16     160    
144    240    
48     256    
-32    64     
-128   -272   
176    112    
-176   32     
48     -256   
48     -352   
-144   -48    
208    464    
-64    32     
-64    -16    
192    0      
112    -96    
-112   -80    
96     128    
48     0      
192    96     
-224   -144   
256    160    
112    48     
-16    -416   
192    -32    
16     -48    
-64    112    
-96    32     
80     48     
-192   -160   
208    -64    
-64    288    
128    160    
-160   -208   
192    -96    
128    64     
64     -144   
112    176    
112    -336   
336    528    
560    -752   
-112   96     
128    -96    
32     -96    
288    -144   
48     32     
128    -96    
64     48     
16     128    
176    80     
0      96     
144    -144   
-32    80     
144    -16    
48     80     
144    16     
80     96     
16     0      
-64    96     
0      -224   
-80    -192   
192    -96    
64     160    
32     -32    
-80    -160   
144    224    
-480   -240   
656    112    
-304   176    
160    -96    
-64    -160   
112    -192   
-48    -448   
64     -96    
160    -16    
80     32     
112    80     
48     160    
0      0      
-48    -96    
80     -64    
-64    -16    
288    192    
-48    224    
208    176    
-16    -208   
-96    112    
256    -288   
160    -32    
144    -96    
-96    96     
144    144    
-160   16     
96     128    
160    16     
-96    144    
176    -320   
304    208    
-272   -432   
160    144    
128    -16    
48     96     
16     -352   
48     112    
0      -96    
-96    96     
64     144    
96     0      
112    160    
80     -112   
192    144    
-96    48     
-96    128    
144    -48    
-32    112    
96     0      
160    96     
-48    -224   
192    16     
-80    32     
-144   -352   
240    80     
-832   32     
48     -400   
16     -96    
80     -256   
160    -112   
-224   64     
224    48     
112    0      
-64    -304   
32     -896   
256    112    
-96    -112   
80     48     
128    16     
-16    -96    
-1296  -64    
-80    -272   
256    -192   
-96    -192   
288    48     
-112   -240   
0      -224   
144    352    
112    -80    
-32    128    
0      32     
80     -80    
64     96     
352    -192   
-80    -208   
-176   -64    
128    -240   
112    -64    
-16    -64    
48     -48    
-32    -448   
16     -288   
272    128    
-80    96     
-16    112    
-128   80     
64     0      
16     64     
176    80     
128    32     
-240   0      
-64    64     
-432   -32    
-80    -144   
64     -96    
16     -304   
32     -64    
-48    -48    
64     0      
-48    80     
0      96     
16     -240   
176    0      
-160   -48    
96     128    
-256   -32    
160    32     
-864   -96    
96     -160   
80     0      
128    32     
64     16     
-96    -96    
144    80     
32     -976   
-48    48     
80     -64    
192    224    
16     160    
48     -16    
-320   -48    
80     -48    
-224   144    
144    -48    
-160   32     
160    -16    
-208   -96    
64     -416   
-32    -352   
-32    -672   
416    -16    
80     144    
32     -80    
-80    -224   
32     -576   
-32    -400   
-128   16     
80     -64    
-16    -64    
-272   0      
-144   -224   
336    -96    
-192   32     
32     32     
-32    -352   
112    48     
32     -1264  
-16    -352   
48     -112   
-16    48     
112    128    
16     48     
-432   -64    
0      192    
-64    208    
48     64     
48     96     
0      -64    
144    96     
80     -144   
128    320    
16     224    
-16    320    
144    224    
-96    -112   
112    -32    
208    -176   
-416   -336   
144    -272   
-240   32     
240    160    
288    192    
96     -128   
16     144    
48     -112   
48     240    
-144   112    
112    352    
-96    320    
16     208    
-304   0      
-112   -544   
-176   -320   
16     -96    
48     384    
80     -16    
-272   -64    
-1072  -16    
80     224    
-784   -80    
-256   -80    
-128   96     
-336   -272   
-240   32     
-176   288    
-384   0      
32     -16    
-16    -176   
48     240    
176    416    
-320   -368   
192    -48    
-560   64     
208    -176   
-48    128    
-176   -112   
-80    -224   
32     304    
-240   96     
-592   -416   
208    -336   
-992   -288   
288    -80    
-48    560    
48     -272   
96     -512   
0      -48    
128    16     
176    32     
-336   -80    
80     32     
32     48     
-192   32     
96     48     
-32    -16    
80     64     
-368   96     
-64    128    
-240   144    
16     64     
-208   0      
224    416    
0      -96    
-304   -208   
128    -32    
80     432    
32     368    
-16    176    
-144   64     
-16    -192   
-96    160    
-64    48     
-80    -144   
-576   -32    
-32    32     
-16    64     
80     32     
-96    -192   
-64    -128   
96     224    
-16    224    
-16    -16    
32     160    
16     112    
-80    128    
-80    -64    
0      96     
144    144    
-416   -32    
-16    96     
48     -96    
48     96     
0      -336   
-16    16     
16     80     
-96    32     
-96    -32    
224    48     
-304   -112   
96     -32    
-224   -608   
32     -576   
96     -160   
-352   -272   
224    80     
-160   -48    
32     224    
176    -224   
-112   128    
80     48     
-112   -64    
-48    64     
160    -128   
-112   912    
-96    -128   
16     -576   
48     608    
32     32     
-144   112    
160    272    
-624   -128   
32     432    
112    -48    
-16    208    
-128   -112   
-144   -672   
208    256    
-256   -256   
112    0      
64     400    
-208   -144   
-368   -512   
432    384    
-272   160    
96     -64    
-16    0      
-240   128    
-16    48     
32     -96    
112    0      
-16    -128   
-96    416    
-48    -576   
128    -240   
-224   -192   
128    112    
-160   320    
208    160    
-336   -384   
256    224    
-80    512    
-112   288    
208    -128   
64     64     
64     16     
-192   -272   
0      -32    
64     192    
-176   368    
112    112    
-112   -128   
-112   0      
192    -96    
-96    -144   
64     -48    
16     -48    
128    48     
80     192    
0      112    
64     144    
64     0      
-96    256    
32     64     
0      48     
-112   16     
160    96     
-192   -224   
-112   -64    
-48    -16    
-272   16     
32     -48    
144    352    
0      -48    
48     48     
64     160    
-16    -64    
-32    96     
48     48     
48     144    
-176   -112   
0      144    
128    832    
48     256    
-224   96     
224    64     
-16    176    
-32    192    
-208   224    
-16    48     
-224   32     
-32    176    
128    192    
-16    32     
16     48     
-64    -112   
-112   -176   
48     -64    
32     64     
560    160    
-272   112    
176    160    
-96    0      
144    208    
32     176    
-272   16     
64     144    
-240   64     
16     -112   
-96    -80    
96     -16    
224    -16    
-208   -160   
256    48     
32     224    
208    208    
-192   48     
64     272    
-112   288    
-176   208    
32     64     
-96    -48    
-128   -32    
128    112    
208    112    
0      96     
64     48     
288    128    
-48    96     
80     400    
80     144    
-80    -96    
-16    96     
-16    144    
-128   80     
32     160    
-128   48     
128    64     
96     80     
-16    160    
-48    80     
-16    112    
-32    32     
96     32     
48     80     
64     -128   
96     16     
-80    -96    
64     -112   
0      64     
112    112    
16     16     
0      160    
-16    64     
-112   128    
208    -80    
-16    64     
192    144    
-80    -32    
-96    32     
48     -848   
16     -64    
-16    112    
176    48     
0      112    
160    96     
-96    112    
192    192    
-256   -160   
288    64     
-240   -32    
112    64     
48     112    
80     -160   
80     64     
48     -144   
48     80     
-32    -1296  
176    128    
-16    224    
-112   96     
288    64     
32     176    
-64    0      
-48    48     
240    160    
-160   -96    
176    80     
48     0      
208    112    
-64    0      
192    144    
-32    -96    
96     112    
-112   0      
48     0      
96     -32    
16     160    
96     96     
-48    176    
-64    -80    
16     -128   
64     80     
0      -80    
144    96     
0      32     
-32    128    
64     -672   
-32    80     
32     -736   
-16    -112   
64     -16    
96     160    
32     16     
0      64     
-16    32     
160    -384   
176    0      
-48    96     
16     240    
80     -320   
0      96     
176    -480   
-80    240    
-288   -336   
240    80     
128    320    
-64    208    
-32    32     
160    64     
64     -144   
-128   -368   
144    -48    
80     -144   
-16    96     
144    16     
176    32     
-112   -208   
80     -80    
-80    128    
272    112    
-320   -368   
288    48     
0      496    
-16    -176   
224    -1136  
0      0      
64     -208   
-16    -288   
368    288    
-128   160    
-64    -32    
240    496    
-32    -32    
64     -400   
-48    -1696  
112    160    
0      -416   
288    -32    
-80    240    
64     0      
-112   -176   
32     -1456  
112    -32    
80     160    
-16    -96    
32     -16    
304    -16    
80     -192   
-16    96     
304    -96    
-32    400    
32     -272   
96     -336   
-624   -16    
-32    -320   
160    -64    
-16    -176   
240    192    
-112   96     
224    320    
96     720    
64     -320   
144    -16    
64     48     
144    -144   
256    -32    
-320   144    
192    -32    
-528   -320   
64     -640   
256    320    
112    400    
-48    -224   
176    -400   
32     -128   
-240   32     
0      240    
128    -224   
-208   336    
240    -80    
32     1024   
-432   -624   
400    -224   
-192   160    
-32    224    
-1072  -208   
48     -464   
144    432    
432    -32    
-544   -704   
368    -112   
208    480    
32     -464   
-128   48     
-48    -160   
224    96     
-464   384    
608    -416   
16     400    
416    -384   
-672   496    
128    -352   
128    -432   
256    768    
-32    0      
-16    -304   
-160   304    
144    -1760  
528    528    
-368   0      
-48    -208   
176    48     
128    -128   
-256   -400   
48     -240   
-400   -80    
-16    -96    
-304   96     
64     128    
320    16     
-256   -464   
160    64     
0      -912   
64     112    
16     -80    
-32    352    
128    144    
-176   -144   
-80    528    
-160   -544   
48     528    
128    -176   
32     96     
144    208    
-32    -496   
96     -16    
-32    32     
288    -320   
-256   64     
432    -336   
-416   288    
32     -400   
144    240    
-144   0      
256    224    
-320   240    
96     64     
-96    -512   
-240   -624   
192    304    
128    64     
224    480    
-48    -160   
128    32     
-192   192    
64     -288   
-16    -64    
-96    32     
0      48     
96     0      
-256   -144   
0      -128   
-640   -16    
64     -80    
80     80     
-144   -528   
32     -208   
-112   -32    
-624   -176   
416    224    
-480   304    
80     -80    
-64    112    
0      16     
176    240    
-336   -128   
128    -240   
-192   128    
-864   80     
144    64     
-1120  -208   
80     -192   
32     -144   
-176   -224   
-16    -112   
32     144    
96     288    
-1168  16     
80     368    
80     96     
-96    80     
80     304    
64     96     
-240   -64    
-96    96     
-64    -48    
-32    112    
-288   -16    
64     416    
-512   -352   
-272   -464   
256    176    
-496   -96    
0      -16    
-320   0      
-48    96     
-96    -160   
-64    208    
-32    -160   
32     -48    
-96    -64    
0      176    
-48    32     
-160   -224   
64     -128   
-128   -48    
-144   32     
-32    32     
-176   -16    
-400   16     
-480   64     
80     -96    
-80    48     
0      -64    
-16    80     
-16    -16    
-64    -16    
-160   -112   
-32    64     
16     -48    
-144   16     
64     240    
-144   0      
-96    16     
-128   16     
48     -16    
-1152  64     
144    176    
-224   -64    
96     112    
-208   48     
32     -48    
-64    80     
-208   144    
0      176    
-96    64     
-176   80     
-112   112    
-112   32     
-224   -32    
224    160    
-592   32     
32     80     
-192   -112   
48     48     
-48    16     
16     -16    
-32    0      
192    64     
-128   0      
432    384    
-16    -320   
-336   -224   
64     48     
-480   -240   
48     -288   
-144   80     
240    464    
-160   -32    
-32    -96    
-48    272    
-80    128    
320    160    
-96    -16    
-80    32     
-160   -32    
96     32     
-80    176    
272    224    
96     304    
-128   32     
-432   -160   
-192   -64    
112    64     
48     240    
-128   240    
-32    0      
-64    32     
-48    -48    
-16    -80    
144    -176   
64     -240   
-48    0      
-176   -80    
-176   -432   
32     96     
-176   -16    
64     176    
64     112    
64     80     
-208   -528   
64     -32    
-128   64     
-272   64     
96     112    
-160   -64    
-16    16     
-96    96     
-32    32     
-160   -64    
208    208    
-128   80     
32     96     
96     80     
-176   80     
208    208    
-192   48     
160    144    
0      144    
176    80     
-112   -48    
64     32     
-32    32     
-64    64     
-32    16     
96     80     
-288   -32    
80     48     
64     32     
32     144    
112    96     
-128   -48    
64     80     
144    0      
-208   48     
48     80     
-32    80     
-48    64     
96     80     
-80    -80    
48     64     
-240   -48    
192    80     
32     112    
16     64     
-16    64     
-16    48     
160    16     
-48    48     
112    144    
-48    96     
64     144    
-48    -64    
160    32     
0      32     
-32    -80    
32     -16    
64     48     
-32    64     
112    0      
0      16     
128    128    
32     32     
0      80     
144    -112   
-160   -64    
144    -32    
208    16     
-176   160    
-176   32     
128    112    
32     32     
288    256    
-80    320    
-64    160    
-256   -320   
272    320    
-112   224    
-128   -336   
160    416    
16     528    
-112   224    
-64    -112   
48     -64    
-96    16     
176    -32    
64     576    
32     336    
-32    -64    
32     176    
-16    -256   
112    64     
144    208    
-80    -144   
208    64     
-32    224    
32     240    
48     384    
144    240    
-128   256    
176    48     
-32    224    
80     112    
32     304    
96     -16    
128    80     
-16    48     
-16    64     
64     304    
-112   96     
80     -288   
-64    160    
160    -80    
-64    80     
64     80     
16     -384   
80     96     
-48    -896   
176    288    
-224   -368   
336    256    
80     384    
48     80     
32     32     
224    128    
48     272    
-16    112    
-80    -288   
320    -272   
64     640    
16     144    
16     -352   
-80    -480   
-32    -16    
96     304    
-96    208    
128    304    
0      240    
-320   352    
288    -336   
-144   -224   
592    160    
-224   176    
240    -80    
528    448    
-96    400    
80     192    
-64    -176   
352    128    
-160   -688   
-208   -544   
336    -160   
-16    320    
32     -48    
288    384    
-64    80     
64     96     
368    32     
-80    -32    
32     112    
48     -80    
192    -96    
288    -256   
128    96     
240    -16    
272    448    
-224   -368   
128    -352   
448    240    
48     1296   
-272   -224   
16     -816   
128    -320   
128    432    
0      400    
-240   -128   
208    -272   
-96    -272   
-96    112    
32     128    
544    -816   
-560   176    
672    176    
-16    288    
112    112    
-64    336    
-112   -320   
256    -256   
496    752    
-80    192    
144    -144   
176    128    
16     -112   
176    80     
-80    -272   
48     -208   
176    -720   
448    304    
-32    336    
368    96     
80     -336   
80     32     
112    208    
80     -160   
64     80     
-64    128    
112    -48    
32     -16    
-16    112    
-48    -96    
128    304    
-128   -224   
48     176    
48     -480   
128    -32    
-176   -480   
-48    -224   
384    -160   
-208   -448   
352    -976   
160    304    
-176   -32    
32     -240   
288    208    
-272   288    
160    -832   
-144   32     
144    400    
0      -288   
192    16     
80     272    
48     -304   
128    -448   
128    400    
-48    -800   
96     96     
192    -1696  
-80    -176   
208    208    
-16    592    
288    -112   
-272   -176   
32     -304   
-32    -16    
176    336    
48     160    
-384   -560   
144    -144   
-32    32     
112    -64    
16     112    
160    -400   
48     0      
80     -144   
208    -144   
80     -320   
128    32     
176    -80    
-48    16     
-32    -176   
64     -112   
-176   -144   
16     16     
192    0      
-240   -48    
288    32     
16     -480   
16     -288   
112    -1392  
16     32     
240    112    
-192   144    
176    0      
-64    80     
-32    80     
32     -160   
32     -64    
80     -64    
288    160    
-64    -80    
16     -48    
80     -496   
-48    -272   
96     -256   
112    -16    
96     -224   
80     96     
32     -176   
0      -32    
96     16     
32     48     
-112   -32    
112    -32    
-336   -16    
80     -16    
-160   -80    
16     -224   
64     16     
224    -400   
-96    0      
-64    -752   
272    80     
-144   -16    
-112   0      
-64    48     
16     -16    
32     -160   
-64    -48    
16     16     
-288   -32    
-224   48     
-32    -48    
80     80     
112    -224   
-32    48     
32     -432   
-32    -224   
-192   -416   
176    -112   
-48    368    
160    48     
-656   128    
80     0      
-384   144    
176    32     
-368   -208   
160    -144   
-32    176    
208    -352   
-96    -48    
144    -592   
-112   -112   
-96    64     
-96    -224   
-176   -176   
-160   -432   
-80    -128   
-80    -64    
-160   -96    
176    -208   
-208   -96    
240    -80    
-16    112    
0      -192   
-32    304    
-176   -256   
128    80     
-368   -16    
128    208    
160    160    
144    80     
-64    -16    
160    0      
-64    80     
224    16     
64     176    
208    80     
0      -16    
-208   -16    
480    528    
-960   -352   
-176   -272   
64     -64    
-928   -80    
-144   -16    
-144   16     
-64    -96    
0      -80    
-80    192    
-64    -16    
-128   -16    
-80    16     
128    128    
-32    -128   
112    128    
160    304    
-576   32     
208    160    
-320   96     
-112   -112   
-1056  -128   
-32    16     
-64    -144   
192    16     
-208   -16    
432    160    
-272   -80    
240    160    
0      -112   
-384   112    
144    64     
-96    96     
144    32     
-192   32     
-176   -96    
48     -96    
-80    -48    
-304   32     
288    320    
-432   112    
96     192    
-208   -128   
96     80     
-80    0      
-272   -16    
192    -64    
-48    0      
48     128    
-272   -16    
-224   32     
176    80     
-32    144    
-304   128    
-16    64     
-16    -16    
128    128    
288    160    
-112   176    
64     48     
-96    -16    
0      48     
16     0      
-128   32     
-208   -80    
-80    -64    
-48    -64    
-32    16     
-64    -48    
48     -32    
-1632  -224   
176    64     
80     -112   
96     96     
-64    96     
0      -224   
-112   -256   
160    16     
64     160    
-16    -16    
80     208    
-224   16     
-144   -656   
-224   -320   
288    176    
-48    192    
-16    -16    
-64    -160   
96     176    
-304   -144   
-80    -144   
160    -48    
-48    80     
-64    -176   
32     128    
-144   64     
-48    0      
-96    112    
32     32     
-48    48     
-176   -64    
48     80     
160    -96    
0      80     
320    256    
-320   112    
-112   -16    
96     240    
-128   -416   
16     176    
224    176    
-160   176    
-64    -192   
80     400    
16     128    
-96    160    
-32    -64    
80     192    
-16    -112   
32     256    
32     128    
-16    -48    
32     144    
-48    32     
-16    -48    
112    80     
-32    304    
-64    128    
64     -128   
-160   -240   
0      0      
64     320    
-32    -32    
32     -32    
48     32     
16     144    
0      -32    
-32    -224   
160    336    
-80    240    
224    64     
-160   -64    
0      32     
-128   -48    
48     128    
16     16     
-112   32     
112    80     
-80    0      
48     32     
-112   32     
16     64     
32     64     
48     80     
-16    16     
-32    64     
-128   -128   
208    32     
-192   64     
112    320    
0      352    
-144   96     
-64    -192   
0      48     
-16    -80    
176    16     
0      112    
208    16     
-384   -272   
16     -352   
224    160    
-128   -16    
16     -80    
48     -112   
320    112    
128    352    
-256   560    
624    368    
-304   176    
-336   -624   
-128   -368   
-80    224    
288    320    
-112   240    
80     320    
304    624    
16     496    
128    -32    
-16    224    
80     448    
-224   -208   
144    -128   
-336   -272   
-112   -336   
224    416    
-256   160    
-64    -64    
16     176    
64     96     
-80    16     
-48    -32    
-144   192    
208    128    
-400   -416   
144    -160   
-64    304    
-192   -416   
48     256    
-240   -272   
-32    736    
160    352    
-336   -240   
192    144    
-64    112    
16     -160   
144    -80    
-96    80     
-96    384    
160    16     
-336   -48    
128    128    
0      96     
16     -16    
-64    96     
64     112    
-272   -672   
208    368    
144    416    
-608   -416   
192    -224   
-64    528    
16     528    
272    432    
-48    160    
-48    -304   
16     192    
176    464    
80     160    
-80    -96    
240    -272   
0      -80    
192    0      
-16    336    
48     80     
-304   -48    
80     0      
96     -64    
-48    -80    
-176   -112   
128    -272   
80     80     
-32    -496   
64     96     
112    64     
-208   64     
176    -16    
-176   -64    
208    -304   
-192   -48    
-32    -32    
160    -16    
32     48     
-16    -144   
128    160    
-176   -64    
-112   -16    
-144   -304   
224    112    
96     80     
48     256    
112    256    
32     80     
-96    -112   
80     0      
-64    -112   
-16    112    
-128   48     
112    -48    
32     560    
48     64     
-64    32     
0      -736   
48     80     
64     -576   
-64    -16    
144    -16    
112    64     
112    -96    
112    32     
144    0      
-48    16     
208    192    
-64    336    
256    208    
-64    -32    
48     256    
-96    64     
0      96     
64     -784   
96     -96    
192    -544   
-48    160    
-16    0      
-256   96     
144    -16    
-16    -400   
208    -160   
16     96     
-352   -288   
272    -144   
272    96     
-112   -128   
64     176    
16     -112   
16     -16    
16     -112   
0      144    
16     64     
0      32     
0      32     
96     -816   
16     128    
32     -464   
-64    128    
48     -32    
0      64     
32     -96    
80     144    
192    -224   
-144   144    
48     160    
112    208    
64     0      
96     -208   
-32    -80    
144    48     
-80    112    
-16    160    
224    48     
-160   -112   
176    64     
-48    -192   
32     96     
352    64     
-352   144    
144    80     
112    -80    
-64    -48    
128    -240   
48     -672   
160    -16    
-144   -272   
224    32     
96     -1408  
16     -48    
16     160    
96     80     
16     224    
32     368    
-112   48     
96     32     
0      -96    
112    -96    
64     0      
-48    -80    
368    192    
32     -192   
-176   -32    
64     -480   
192    -64    
48     -304   
-48    -128   
16     -144   
144    -80    
64     -112   
16     -112   
144    -320   
-16    160    
-208   -32    
224    0      
-848   -16    
224    16     
-32    -160   
128    -144   
144    304    
0      -224   
-64    -160   
240    -1680  
-128   48     
-128   -288   
112    64     
80     128    
144    -16    
-112   -32    
-64    -224   
16     -64    
96     -96    
128    0      
384    448    
-352   336    
48     -240   
-80    -16    
128    -1408  
240    224    
-432   128    
32     -96    
-16    0      
464    256    
-528   16     
-16    -224   
-64    96     
112    -112   
-304   32     
112    -160   
-16    -160   
-64    -624   
64     -32    
32     -384   
-208   -160   
80     192    
16     96     
-384   -112   
64     -32    
-144   -128   
-80    32     
224    144    
-224   80     
-560   -112   
-256   64     
-64    -80    
-144   -96    
32     16     
64     -112   
-112   64     
240    48     
128    128    
-96    -32    
-112   0      
112    -80    
256    -80    
48     80     
-16    48     
-880   -32    
112    -16    
-496   176    
128    -96    
-224   80     
208    -224   
-80    64     
32     -944   
-32    80     
-96    208    
128    32     
-256   -112   
256    96     
-160   112    
-80    32     
-80    -16    
-192   64     
-48    -16    
16     -128   
0      16     
32     -320   
-64    144    
128    -704   
-48    16     
144    64     
-64    112    
-272   -48    
96     48     
-48    -208   
16     96     
-16    400    
0      -80    
160    368    
-208   80     
48     -192   
224    688    
-48    16     
144    -144   
-96    224    
-416   -272   
-48    64     
80     432    
32     -272   
128    208    
-96    -592   
-64    -160   
80     -48    
-176   240    
-528   16     
-112   -208   
-16    -112   
160    64     
-224   16     
-160   0      
-240   16     
-608   48     
-224   16     
224    -16    
-48    48     
80     -128   
-160   -16    
144    -48    
-16    272    
-32    32     
64     -32    
-384   -192   
32     208    
-144   112    
48     96     
-160   0      
96     -128   
-96    -80    
-144   -144   
32     112    
128    176    
-240   -32    
-32    112    
-128   224    
-128   -48    
64     112    
-240   -192   
0      -32    
-80    112    
48     32     
-48    96     
-240   96     
48     384    
-464   208    
-64    16     
-1136  0      
32     48     
-16    -16    
16     16     
64     -96    
-48    -192   
48     -288   
16     -128   
256    -144   
0      176    
-144   64     
-32    -32    
-64    -16    
-144   128    
48     32     
-224   -16    
80     -16    
-304   -48    
-48    16     
-112   -32    
16     48     
96     16     
-48    80     
80     96     
-96    -96    
128    -64    
-240   -32    
64     -80    
-64    16     
-64    64     
-512   -128   
64     64     
-704   -48    
80     16     
64     160    
-192   -480   
-16    256    
96     336    
-160   160    
112    112    
-288   -80    
-48    64     
-96    160    
-192   64     
-112   -320   
-240   -144   
224    96     
-688   -400   
240    64     
64     96     
-80    32     
-32    48     
-208   -336   
336    320    
-352   -112   
256    320    
-144   576    
128    256    
-336   -288   
64     64     
-128   -48    
-32    144    
-320   -224   
-48    -32    
112    128    
-64    192    
96     -80    
16     -64    
-64    208    
48     208    
32     144    
-288   -192   
16     32     
144    160    
-176   272    
64     160    
-128   272    
208    400    
-144   48     
96     96     
-80    -48    
-16    32     
0      48     
64     -112   
96     48     
-32    336    
272    448    
-32    240    
-176   48     
48     160    
-192   -144   
-400   -48    
32     -96    
-224   -224   
208    -240   
32     176    
48     80     
-128   176    
144    96     
-128   112    
-96    48     
-112   -16    
-64    -16    
-176   -64    
32     32     
-48    -224   
16     -112   
224    80     
112    208    
-16    96     
-160   48     
96     80     
240    256    
-64    96     
-64    -96    
-80    -144   
480    176    
-80    192    
80     -96    
-160   48     
192    48     
48     112    
-32    96     
-80    -96    
128    32     
112    128    
96     192    
112    64     
-80    64     
-16    0      
16     0      
48     64     
240    272    
-272   96     
80     128    
-80    0      
16     16     
128    112    
128    32     
128    32     
96     80     
80     96     
-96    -80    
64     -112   
-16    32     
80     128    
-320   -352   
-32    96     
96     32     
16     32     
-208   -32    
32     96     
-16    -16    
-32    -32    
80     224    
176    112    
-176   64     
32     144    
112    32     
32     -16    
16     0      
0      0      
96     80     
64     112    
-96    288    
0      80     
80     -416   
-224   208    
288    96     
-144   64     
-80    -128   
288    32     
-128   160    
128    -96    
-288   64     
416    176    
-288   -16    
304    176    
-144   0      
-16    48     
240    32     
160    160    
-224   128    
-64    128    
240    112    
-128   0      
32     128    
176    32     
-144   96     
16     32     
16     64     
32     160    
32     112    
-48    -64    
32     48     
96     128    
-48    -288   
128    128    
-48    32     
160    80     
-16    32     
48     80     
112    144    
64     48     
-112   64     
64     400    
176    48     
-160   -32    
112    112    
112    -16    
-112   32     
80     -176   
0      128    
-32    -368   
96     112    
432    352    
-496   64     
176    144    
48     80     
32     96     
16     48     
48     -128   
16     48     
192    32     
-16    -224   
32     208    
256    -16    
16     144    
64     -256   
-16    -16    
48     96     
80     112    
16     -80    
176    176    
112    64     
-80    48     
-48    -112   
96     176    
64     64     
-96    -112   
80     112    
-128   -304   
64     -112   
192    -96    
-128   16     
-32    -624   
48     64     
64     96     
0      160    
64     0      
0      80     
112    144    
-144   176    
-16    16     
112    48     
80     -64    
-16    -208   
48     144    
-32    -336   
16     208    
32     32     
112    32     
-48    -16    
80     96     
-80    16     
64     -128   
128    -288   
48     -112   
288    240    
-32    -656   
-112   -64    
256    -336   
144    64     
112    -112   
96     128    
-16    -144   
240    16     
-128   48     
320    112    
-96    32     
128    96     
-128   -16    
352    -160   
-112   160    
112    -176   
0      96     
224    16     
-80    16     
-176   -320   
224    -448   
128    -272   
336    240    
-224   48     
352    16     
-80    -192   
192    -1712  
224    -288   
128    -112   
-16    -1440  
48     -48    
128    16     
112    -80    
-112   64     
16     32     
96     -80    
-128   -304   
304    -496   
256    192    
-16    112    
-80    112    
-240   -224   
-176   -816   
64     -192   
96     -352   
144    16     
-128   -288   
256    112    
-64    592    
240    288    
48     176    
224    224    
-112   16     
16     144    
272    0      
-336   -144   
144    -128   
-48    16     
-176   0      
112    -48    
48     -80    
64     112    
80     -560   
48     -224   
64     128    
-80    192    
464    -112   
-160   208    
176    -16    
-176   -528   
-16    -144   
48     320    
144    160    
-176   -16    
80     -336   
224    224    
-144   -320   
176    -128   
96     -96    
64     128    
32     -128   
-128   -32    
-144   -480   
32     -208   
80     -416   
-32    -96    
-128   -256   
96     16     
-496   -96    
208    -192   
288    -16    
-112   16     
256    16     
32     -304   
-464   -160   
0      -1456  
-96    96     
160    -16    
-64    48     
96     32     
16     32     
-112   16     
208    -112   
-432   -96    
448    272    
-288   368    
80     112    
-112   -144   
192    -288   
160    192    
112    -320   
64     80     
96     144    
192    288    
-160   -80    
112    -112   
-64    496    
144    192    
-272   0      
192    96     
-176   48     
112    -96    
-352   -80    
80     -128   
-16    16     
64     -208   
0      48     
208    -320   
112    -64    
0      -48    
0      0      
-176   -96    
272    32     
-32    0      
128    -336   
-400   160    
128    -112   
-272   -112   
-32    16     
-48    64     
32     -384   
32     80     
64     -752   
336    32     
-480   288    
-64    -208   
-112   -288   
112    -32    
-112   48     
112    -48    
-16    48     
16     32     
32     80     
192    -48    
176    448    
-48    176    
-208   -400   
144    -288   
224    144    
-160   96     
80     -80    
-64    176    
96     -64    
-208   -112   
656    672    
-640   96     
160    -288   
-384   -64    
480    -336   
-160   144    
96     -192   
256    304    
-144   -16    
-400   -272   
96     256    
-1440  160    
-80    -192   
96     96     
-64    -144   
-48    -32    
-80    -192   
-928   -176   
128    400    
-832   -64    
112    -64    
-560   -672   
-96    -272   
176    16     
-112   80     
-48    -16    
-80    48     
-224   0      
-256   -64    
-64    80     
48     16     
-64    -80    
-288   -16    
224    384    
-288   128    
32     -96    
-64    -112   
96     -112   
256    144    
-368   96     
96     240    
-80    -160   
144    32     
-240   144    
-144   96     
-176   -80    
112    176    
-192   -16    
80     48     
-16    224    
320    144    
-608   -544   
368    96     
-64    224    
-304   -160   
-80    96     
112    -32    
-512   48     
-320   -80    
-496   112    
128    -32    
-336   96     
224    -64    
48     272    
-128   -160   
-80    112    
112    80     
96     160    
-96    272    
48     112    
-192   -48    
64     16     
144    240    
-336   96     
112    80     
-256   48     
320    -16    
-240   -192   
368    64     
160    -80    
-192   48     
112    -16    
16     -160   
48     176    
-80    32     
-80    -16    
0      -48    
-64    -64    
96     -48    
128    -16    
32     -192   
96     208    
-1616  -64    
80     96     
-16    -48    
96     80     
64     -48    
-272   -80    
-16    48     
0      112    
-80    32     
-48    48     
80     96     
-288   16     
-96    96     
-336   -80    
-32    80     
-480   -16    
192    288    
-80    48     
-144   -144   
-208   16     
240    64     
-176   80     
64     64     
32     96     
-64    64     
-32    -176   
-208   -160   
160    -48    
-192   -112   
176    96     
-192   -80    
272    0      
112    272    
-80    16     
0      -16    
16     64     
128    48     
-48    80     
96     80     
-352   -464   
288    16     
96     160    
-224   64     
-64    -48    
96     16     
-48    -32    
32     112    
96     64     
96     128    
-208   128    
-16    -48    
112    48     
-48    64     
16     112    
-96    96     
80     144    
-240   -80    
48     320    
-96    -48    
-256   -336   
-96    -144   
32     48     
-160   80     
128    96     
-32    48     
-112   0      
96     -64    
112    96     
-32    64     
0      128    
256    224    
-288   64     
96     96     
-128   -112   
0      48     
192    256    
-176   96     
96     96     
-48    80     
112    48     
-192   32     
112    32     
80     80     
-96    80     
80     80     
-80    64     
-176   -112   
80     64     
-208   -272   
384    -192   
-128   128    
80     240    
32     80     
-32    0      
192    112    
-112   -32    
-96    64     
160    32     
112    80     
-48    32     
64     32     
-80    -32    
144    128    
-224   -32    
240    64     
-112   -32    
144    48     
-32    176    
96     368    
64     176    
-64    -16    
144    48     
32     0      
48     80     
-176   0      
224    -32    
32     -48    
192    128    
-64    128    
176    80     
-80    0      
160    192    
48     128    
-16    32     
128    48     
-160   -272   
80     -64    
160    48     
0      48     
-48    0      
256    320    
-208   272    
-192   -288   
-80    48     
208    -736   
-80    -224   
336    144    
-224   160    
64     16     
-176   0      
128    432    
144    384    
-48    0      
144    112    
64     -32    
-192   64     
16     -144   
48     -128   
0      48     
-48    -320   
240    224    
288    288    
-32    96     
128    112    
16     0      
-48    -208   
32     32     
48     0      
-64    48     
-208   -32    
-16    -176   
-208   -336   
272    -16    
-208   -64    
176    -400   
80     48     
336    256    
-240   288    
176    432    
96     208    
0      160    
32     176    
96     224    
32     96     
-32    48     
-16    -80    
128    -176   
-80    -96    
272    -64    
304    -48    
64     240    
-64    -912   
32     -32    
80     -96    
288    480    
-336   -16    
208    -16    
112    144    
-80    -128   
112    192    
-32    -32    
288    32     
-112   -240   
256    -32    
-160   -64    
64     32     
80     -320   
-112   -176   
160    144    
112    128    
-32    16     
64     112    
0      48     
96     96     
64     176    
-48    80     
96     80     
-144   -112   
32     -96    
224    192    
144    656    
-128   -1008  
80     -176   
240    -144   
-16    256    
112    -352   
64     80     
384    384    
-336   256    
48     -112   
-176   -464   
128    -224   
0      -208   
208    336    
0      0      
16     240    
128    112    
0      -80    
400    256    
-208   464    
96     128    
144    64     
0      240    
176    16     
-176   64     
272    -16    
48     64     
112    -48    
-32    16     
48     -80    
128    80     
-16    -112   
32     32     
48     -1280  
224    192    
-64    -32    
-32    176    
432    448    
-112   80     
48     160    
208    -64    
0      336    
160    -144   
80     256    
128    0      
64     208    
304    592    
-240   -32    
64     -416   
128    256    
32     240    
-32    -816   
32     160    
-880   -144   
16     -928   
-16    -272   
64     -1520  
0      -112   
-32    144    
64     48     
112    -48    
64     96     
32     128    
32     -144   
256    -176   
-112   112    
160    272    
-48    80     
-848   144    
192    -496   
-144   400    
528    832    
-352   -32    
288    -304   
-96    -32    
80     -336   
-80    -160   
224    -656   
-48    160    
16     -176   
144    80     
-80    -432   
64     128    
-320   0      
64     -256   
0      112    
128    256    
-32    -288   
64     -368   
80     -240   
-48    -848   
96     144    
-32    96     
-416   -160   
0      144    
112    -112   
-144   -272   
240    -528   
-384   -224   
160    -288   
-272   -144   
48     -16    
112    80     
64     64     
128    128    
240    -192   
-112   80     
112    176    
-16    64     
176    160    
16     32     
-128   -64    
160    32     
-80    48     
48     32     
-1024  -144   
112    -240   
64     -176   
-272   -112   
384    -208   
32     -128   
208    272    
-48    -816   
-144   160    
64     32     
64     176    
-96    128    
48     -96    
-192   160    
144    672    
-48    448    
0      80     
-304   224    
144    176    
-128   -64    
0      -272   
80     96     
144    -16    
-32    208    
224    272    
192    -64    
-160   -32    
96     -208   
-64    -48    
32     0      
-16    -112   
-64    -144   
-560   112    
80     -176   
-1584  -96    
32     -112   
16     256    
64     -496   
-144   304    
16     -1024  
112    16     
80     160    
-224   -80    
-304   0      
496    -32    
-384   -80    
-128   32     
-160   -64    
224    -176   
80     96     
-64    -80    
192    384    
-64    0      
64     64     
-496   80     
240    -48    
-352   160    
224    160    
-304   160    
240    160    
-128   32     
16     96     
128    16     
144    48     
144    -16    
64     0      
160    80     
32     -304   
-32    0      
-192   64     
96     80     
112    304    
-128   64     
-208   80     
-16    32     
-80    64     
304    112    
-272   32     
256    48     
-336   64     
-1664  -320   
144    160    
-432   -32    
-464   -32    
-128   80     
80     16     
-256   48     
-672   48     
-240   -16    
160    48     
-128   -144   
-96    144    
192    80     
-1232  -80    
0      128    
112    -96    
80     128    
-432   -48    
-144   48     
16     64     
-272   -80    
-32    288    
208    32     
-160   -240   
-624   144    
160    112    
-112   80     
-64    -32    
-48    -176   
144    96     
-64    -16    
64     96     
64     112    
-160   -112   
-32    80     
-48    112    
-48    64     
-368   48     
64     -144   
-64    48     
-368   -112   
-1136  112    
-16    -64    
-272   -80    
144    256    
80     32     
64     112    
-16    48     
48     48     
-64    288    
208    352    
-112   96     
-80    -208   
128    -224   
-16    32     
48     48     
-288   32     
128    80     
-16    64     
144    192    
-208   -80    
-80    -80    
80     -176   
-80    -16    
144    112    
64     64     
-80    0      
-32    -80    
64     96     
16     80     
-16    96     
-192   -144   
-128   -80    
64     -80    
48     160    
0      -96    
16     64     
16     80     
16     0      
32     32     
-32    -32    
-96    0      
-112   64     
0      -48    
48     48     
96     48     
-576   -64    
128    176    
-944   -160   
16     -32    
-80    -272   
48     -224   
64     -32    
128    208    
-64    -96    
-112   128    
304    496    
64     272    
-80    -256   
32     -416   
64     400    
-192   -208   
336    -80    
-272   256    
160    384    
144    208    
-64    144    
48     32     
-112   -112   
48     112    
-80    32     
16     80     
-176   64     
0      96     
-368   -288   
64     176    
-80    160    
-32    32     
-272   -144   
144    -128   
-96    16     
32     -64    
144    240    
144    80     
32     32     
112    -416   
-160   -400   
80     0      
-16    -16    
-96    192    
64     144    
-96    -96    
16     16     
128    -192   
0      144    
128    144    
32     64     
32     -80    
240    608    
240    256    
-224   -368   
16     64     
96     624    
192    -48    
-208   -208   
112    416    
-128   -16    
112    -48    
0      0      
368    224    
-320   -144   
272    176    
16     -144   
-208   -224   
160    336    
-192   -32    
176    64     
-32    112    
128    -16    
-144   32     
-64    288    
-64    -496   
128    320    
64     368    
-32    -16    
0      128    
-64    64     
80     -64    
0      -64    
176    416    
-144   -16    
288    -80    
-144   -160   
-64    48     
128    32     
32     288    
-128   -48    
-80    208    
16     64     
48     64     
-112   -64    
160    112    
-224   -352   
432    192    
64     432    
-112   -368   
112    368    
0      0      
224    80     
144    768    
-208   48     
208    48     
-16    96     
64     80     
32     80     
16     48     
-48    16     
128    192    
192    592    
64     272    
-192   -240   
288    -80    
96     32     
-176   128    
-64    80     
128    -208   
-32    144    
208    256    
-176   -288   
-80    -16    
96     -336   
-192   -144   
240    240    
64     640    
32     128    
-96    0      
-16    192    
80     176    
-112   288    
80     -288   
96     272    
176    144    
-96    -320   
224    944    
80     -32    
-16    -80    
-96    32     
128    48     
304    240    
-192   16     
-144   96     
160    128    
-16    48     
32     80     
-16    80     
0      -80    
32     112    
0      32     
48     176    
128    32     
0      112    
112    -320   
-16    -96    
720    496    
-560   624    
144    -720   
96     48     
80     880    
-16    -64    
48     0      
96     80     
-192   -128   
-16    -288   
64     -144   
64     544    
-80    0      
256    96     
-240   144    
192    32     
-272   -48    
-32    32     
224    256    
-144   -128   
272    160    
64     112    
144    -32    
144    176    
48     -144   
32     144    
-48    -1584  
464    288    
-80    288    
16     64     
80     -112   
-96    -352   
80     -224   
48     496    
96     -48    
-176   -80    
48     -128   
176    -112   
-80    32     
-352   -640   
176    -48    
112    -240   
0      176    
192    -496   
-64    272    
160    272    
-128   80     
224    -272   
336    48     
-64    64     
-16    -48    
80     112    
176    -160   
112    272    
48     64     
-64    160    
208    -448   
-240   -112   
368    -1648  
-64    160    
64     144    
112    112    
64     16     
144    16     
48     0      
80     -96    
0      96     
128    -208   
176    208    
272    160    
-368   32     
368    -48    
-80    48     
192    -64    
16     128    
400    432    
-176   352    
-160   48     
160    128    
48     400    
240    -192   
-160   32     
352    128    
-32    80     
-64    -48    
160    208    
16     -32    
-112   48     
384    64     
112    368    
-176   112    
176    80     
-240   -64    
240    128    
192    80     
256    48     
16     368    
-112   -128   
-48    64     
-80    -224   
-80    160    
-32    160    
192    112    
-112   -480   
112    -1488  
-16    64     
-80    -784   
416    128    
-352   112    
-64    -128   
64     -96    
-128   -640   
80     -112   
-32    -896   
-64    -192   
-80    -16    
-96    48     
-80    -1696  
-96    -64    
-80    -64    
-16    240    
-64    -32    
160    16     
-256   32     
0      -544   
-96    96     
96     -336   
16     288    
-32    -48    
32     -80    
-32    -2496  
272    -16    
272    80     
128    112    
-64    16     
176    48     
176    0      
48     -48    
-336   -128   
48     -144   
144    -64    
96     -16    
368    80     
-16    -176   
96     -80    
144    -352   
-208   -144   
304    -32    
-80    -144   
208    -256   
64     192    
272    -64    
-96    -16    
-64    -16    
128    -16    
0      80     
-96    -48    
144    32     
-64    -16    
0      -48    
208    112    
-288   64     
16     -1008  
-112   144    
240    -112   
-32    -32    
-192   32     
240    48     
-176   -32    
336    128    
-256   -32    
48     0      
-160   48     
16     -208   
112    32     
64     80     
96     80     
48     -192   
400    480    
-288   160    
-48    -144   
16     32     
192    64     
-144   0      
32     -176   
-272   -32    
-16    -176   
-528   -48    
80     0      
-16    272    
48     -144   
-16    144    
128    -704   
160    208    
-208   80     
208    400    
-144   32     
-48    -240   
-32    -416   
64     0      
112    32     
-96    112    
-64    128    
-80    112    
144    64     
-32    64     
96     272    
0      -160   
96     0      
0      -112   
128    48     
-304   16     
176    -32    
-64    112    
-16    176    
-112   -64    
160    -144   
-240   -288   
-32    -48    
-32    64     
-16    -160   
-128   160    
352    -160   
96     0      
-192   -32    
-48    -144   
-32    112    
192    16     
112    272    
0      448    
-144   176    
64     112    
-256   -96    
48     -320   
0      320    
208    0      
-16    32     
-704   -240   
-208   128    
-16    -224   
112    -96    
-64    48     
-80    192    
-160   80     
48     48     
32     48     
-112   -304   
80     48     
224    -32    
48     240    
-400   352    
80     -496   
-144   176    
-336   48     
-96    -736   
-32    320    
-176   528    
-1200  32     
-240   624    
-48    -176   
-16    -48    
16     96     
-144   -32    
-160   -64    
144    528    
-288   -16    
-48    -304   
96     16     
224    480    
-336   160    
0      -304   
-160   208    
-144   -128   
32     96     
-1440  -288   
368    -224   
-272   304    
-224   -96    
-208   -336   
-48    48     
-16    -384   
-48    288    
48     -32    
80     128    
-80    48     
64     -160   
0      224    
288    160    
-272   240    
-32    224    
-128   0      
-720   48     
352    -16    
-272   0      
80     -528   
32     -528   
240    0      
-16    208    
-80    16     
-320   -320   
-32    96     
208    704    
-48    240    
-112   -128   
-384   -256   
224    96     
-432   -80    
48     80     
64     -16    
0      176    
208    208    
-304   240    
-176   -48    
0      -32    
-208   -112   
-80    224    
224    512    
-112   192    
-320   -288   
-448   -1040  
144    640    
-128   -128   
96     64     
-864   -192   
224    -80    
-448   -112   
448    16     
48     736    
-336   -304   
176    -96    
96     480    
-224   -272   
-48    160    
48     448    
-80    -48    
-128   192    
-272   -48    
368    384    
-624   -288   
128    80     
-128   288    
32     96     
-16    96     
-192   -64    
192    144    
-368   -128   
320    336    
-176   0      
160    144    
-144   208    
-16    16     
-192   -16    
128    80     
-352   -176   
-272   224    
240    -208   
-16    608    
640    768    
-1072  -512   
336    -384   
0      400    
-160   -144   
336    -96    
-144   112    
-32    -112   
352    448    
-448   -128   
208    -368   
-112   -80    
96     -96    
32     464    
-80    -80    
128    224    
-240   96     
48     -16    
0      592    
304    -176   
-208   -128   
-16    -128   
-48    -160   
16     272    
-32    -48    
-48    256    
176    432    
-16    -256   
-192   112    
96     16     
-48    96     
-64    64     
64     112    
16     96     
0      80     
-128   16     
16     -16    
-16    368    
224    448    
176    160    
-192   32     
64     -384   
432    576    
-288   720    
-32    288    
144    352    
-192   144    
-176   -416   
144    448    
304    480    
-432   -128   
320    176    
-192   32     
0      240    
32     -32    
-32    -16    
64     208    
160    352    
-176   160    
-16    176    
160    -160   
-160   -64    
80     80     
32     96     
176    48     
-64    64     
80     128    
-32    80     
80     32     
32     0      
-160   48     
288    -16    
0      64     
128    80     
-64    -96    
112    -128   
96     16     
160    112    
64     16     
0      64     
-80    0      
320    256    
-448   32     
224    128    
-128   32     
64     144    
128    128    
-48    16     
160    -96    
-320   112    
128    128    
-432   -32    
528    112    
-176   112    
16     -48    
64     -352   
128    -64    
64     112    
32     176    
128    272    
-144   64     
112    64     
48     128    
-16    48     
0      160    
176    144    
96     160    
-32    144    
80     144    
-80    112    
-16    192    
304    272    
-336   80     
224    112    
-144   32     
-128   -64    
144    160    
-272   -48    
272    16     
32     176    
64     96     
144    208    
-64    64     
48     48     
32     128    
192    -16    
80     -32    
-112   -176   
144    -384   
96     112    
304    -128   
528    784    
-48    800    
80     304    
64     0      
96     80     
-32    304    
-208   80     
-32    64     
-288   -160   
-352   -144   
-320   -16    
96     336    
-160   -48    
-96    112    
0      -352   
64     16     
128    -608   
48     384    
32     -160   
48     -176   
80     -16    
0      -80    
64     -16    
64     128    
176    112    
-48    176    
48     16     
208    96     
32     128    
-112   -432   
480    128    
288    -688   
48     144    
16     -240   
80     128    
240    96     
-144   112    
128    80     
144    112    
-80    48     
96     144    
-144   128    
0      -32    
-16    96     
48     -176   
320    240    
-400   -144   
160    160    
128    -112   
192    96     
-144   -96    
-32    112    
64     16     
0      80     
80     80     
272    16     
-160   176    
48     -144   
-48    64     
0      16     
368    96     
-48    -240   
64     128    
16     -640   
64     32     
32     -48    
176    224    
256    160    
32     176    
-128   96     
48     128    
16     16     
32     -32    
96     64     
-32    -144   
96     64     
-48    -272   
96     80     
192    -240   
160    144    
-32    128    
16     48     
-48    16     
112    64     
48     128    
96     48     
-64    144    
96     64     
96     -16    
-144   -256   
224    208    
112    -96    
-16    208    
112    -160   
-64    -48    
112    64     
80     -480   
-80    64     
96     80     
-240   -384   
224    0      
32     -608   
416    192    
-288   32     
224    -96    
-96    -32    
320    256    
48     304    
176    272    
240    -624   
-48    0      
48     -784   
32     -48    
-64    -80    
96     -96    
112    384    
-32    -400   
192    -16    
16     -80    
48     -48    
-32    -304   
80     208    
96     144    
-16    -288   
224    -16    
32     384    
-176   -144   
144    -480   
-224   256    
160    -432   
16     -384   
16     160    
-64    -608   
224    64     
-144   752    
96     -848   
16     -64    
16     -176   
-224   -192   
80     -144   
-32    272    
112    -176   
160    80     
-160   112    
112    -128   
-1744  -64    
192    48     
64     -32    
-16    -32    
-32    -640   
320    -272   
-80    48     
208    -32    
-16    112    
176    80     
96     112    
-144   -64    
0      -464   
-48    -336   
-48    -96    
32     144    
64     128    
240    144    
32     -144   
32     -16    
384    -464   
-400   16     
256    -1104  
-240   48     
48     128    
0      48     
-32    -16    
128    96     
-192   -16    
32     448    
256    240    
32     96     
-944   272    
-320   192    
96     96     
144    112    
-16    80     
48     -944   
64     224    
208    64     
-80    16     
32     32     
256    -240   
-272   208    
256    112    
-192   16     
48     192    
-240   304    
240    80     
-656   336    
112    320    
-224   0      
240    -352   
48     624    
192    144    
-144   -192   
-192   -16    
288    -272   
0      -208   
-96    384    
448    272    
-64    64     
-208   -496   
64     -432   
-272   176    
-32    -288   
-64    320    
240    -32    
-16    320    
-80    -160   
80     304    
-32    272    
0      -80    
-304   80     
48     -80    
-272   272    
64     -144   
-304   -16    
-128   -128   
224    0      
64     -16    
-80    208    
96     -752   
-256   -704   
-112   -96    
80     464    
-256   -224   
-48    240    
144    32     
-160   480    
80     48     
-144   192    
304    48     
144    1568   
-400   -304   
288    -1040  
192    416    
112    112    
-624   -416   
-48    -176   
-1232  64     
-48    144    
272    16     
-208   -416   
64     -560   
176    -192   
144    384    
-48    -64    
-464   -880   
304    192    
-208   736    
-16    128    
-352   -576   
-128   -160   
-176   -96    
-16    96     
-128   80     
-320   -96    
-48    112    
-1120  128    
-368   64     
144    -64    
160    320    
-448   336    
80     -288   
112    -400   
112    64     
-80    64     
48     144    
32     112    
0      -224   
32     -64    
-32    -208   
-176   -144   
80     144    
-224   208    
-208   160    
96     32     
-208   -64    
96     64     
16     256    
368    288    
-256   336    
48     304    
-144   0      
-176   80     
96     48     
-80    16     
48     -16    
-64    80     
48     16     
-352   -64    
0      -64    
112    192    
-48    176    
304    -48    
-112   128    
32     112    
-144   112    
-64    0      
112    -48    
0      -32    
128    128    
96     64     
-528   -128   
0      32     
-1056  -256   
160    64     
-144   -64    
256    32     
-64    -272   
-48    -64    
0      64     
288    240    
-336   112    
96     80     
32     80     
64     -32    
-80    144    
-96    16     
192    384    
-32    112    
-160   -16    
-96    -144   
224    272    
-128   32     
-32    16     
96     -32    
48     32     
96     192    
-160   -80    
128    16     
-144   96     
-64    96     
-64    48     
64     112    
-16    16     
-32    112    
-176   0      
0      128    
288    0      
-192   48     
-64    -64    
-64    -32    
48     48     
16     0      
-192   -32    
32     96     
192    96     
-224   64     
96     0      
-224   -80    
96     144    
-464   80     
32     -16    
64     32     
0      112    
112    128    
48     128    
80     176    
-48    96     
176    64     
-96    112    
80     80     
-224   240    
320    288    
-416   16     
128    80     
112    144    
-160   16     
144    -96    
-176   -112   
384    288    
-224   160    
-32    96     
-64    80     
-32    80     
-96    -32    
-16    -16    
144    0      
-128   128    
64     32     
80     240    
192    160    
-288   64     
80     48     
-160   -64    
64     -16    
-80    48     
64     176    
240    240    
-160   160    
-48    0      
16     576    
160    64     
-32    208    
-48    -16    
-32    -272   
112    -112   
-16    32     
144    224    
-224   -16    
320    176    
-144   112    
0      144    
192    96     
-112   -32    
-48    64     
-48    -80    
240    0      
0      32     
-112   -96    
-16    0      
-128   96     
128    80     
0      176    
-80    48     
64     144    
-144   48     
32     80     
16     80     
-192   64     
96     112    
-192   48     
0      32     
16     96     
-160   -80    
64     48     
128    160    
-32    192    
64     192    
-32    48     
64     -16    
-48    -48    
-96    80     
16     64     
-32    80     
32     32     
240    224    
-336   0      
128    144    
192    160    
128    192    
-112   96     
64     80     
0      96     
64     176    
48     112    
0      80     
32     112    
-16    16     
192    304    
-272   144    
-48    16     
-16    96     
224    160    
48     128    
112    -160   
-144   256    
64     304    
256    80     
-96    32     
80     112    
128    80     
-80    -176   
192    336    
-64    224    
-64    64     
32     64     
128    112    
112    0      
0      112    
96     -336   
16     96     
64     0      
64     160    
64     112    
-32    32     
144    160    
96     96     
-240   -32    
48     -848   
208    -288   
208    1008   
-176   -272   
16     -704   
208    320    
-80    -480   
16     32     
80     48     
48     144    
128    96     
-32    112    
0      112    
80     96     
64     128    
16     112    
-256   -144   
160    -832   
256    656    
-64    -80    
368    -400   
-32    512    
128    0      
64     272    
112    128    
-32    -16    
-48    64     
-16    -64    
96     320    
16     48     
-64    64     
368    240    
-592   -384   
272    -272   
-112   -224   
48     16     
80     -352   
48     0      
160    -496   
0      96     
176    -992   
-112   -192   
144    -48    
128    432    
96     160    
16     272    
48     320    
160    0      
-80    0      
80     -384   
112    -176   
48     -448   
-16    -128   
160    -192   
352    272    
-112   -144   
240    144    
-64    96     
112    112    
-32    64     
352    240    
-336   64     
304    80     
16     128    
160    -464   
-16    112    
160    80     
0      112    
80     -144   
624    560    
-416   32     
32     336    
48     -16    
96     256    
192    -16    
16     96     
-16    -128   
-32    -928   
-96    -80    
-80    -320   
656    256    
-112   336    
176    336    
224    80     
-64    208    
16     -192   
96     16     
240    176    
32     64     
-160   -48    
32     -352   
176    -640   
320    -16    
0      208    
464    -48    
-48    256    
112    96     
272    192    
224    -48    
0      0      
-16    -208   
192    -1296  
128    240    
-48    -80    
64     16     
192    0      
112    -704   
176    0      
64     -32    
-336   -80    
736    -2400  
-304   0      
48     112    
-144   -80    
96     -304   
0      -64    
-64    -96    
304    96     
0      608    
64     -576   
-256   -592   
688    368    
-208   -96    
0      -400   
96     -64    
32     -928   
-80    -16    
192    -288   
-496   -416   
400    -160   
-160   -48    
192    -176   
-400   -704   
-32    64     
272    304    
-400   -160   
-128   -320   
288    -208   
-368   -240   
160    -32    
144    -128   
-32    672    
272    -32    
-256   -96    
272    -128   
-272   160    
-80    -208   
80     16     
-64    112    
160    -96    
160    144    
224    0      
-784   160    
-16    0      
0      16     
-16    -144   
256    176    
320    -160   
-672   -80    
112    0      
64     112    
16     80     
-176   224    
-48    48     
0      -224   
-112   32     
32     16     
-80    -80    
-16    -144   
0      -272   
0      -320   
192    80     
-80    -144   
-32    16     
96     -1456  
48     -48    
64     -208   
-64    96     
192    -32    
16     -176   
-192   -128   
64     -16    
-192   -64    
0      -96    
-2480  -96    
48     -80    
144    80     
-32    -32    
48     208    
224    -64    
-64    32     
32     -80    
80     -48    
-32    80     
16     -112   
-96    32     
224    0      
-256   -32    
224    -80    
-192   32     
80     -48    
-128   -240   
208    -144   
96     192    
-224   -432   
0      64     
48     0      
48     -160   
48     -224   
64     176    
0      176    
-240   -96    
0      128    
0      -16    
-160   -64    
32     -96    
32     -64    
80     -416   
-16    16     
288    -160   
-48    112    
16     64     
96     -32    
-224   48     
0      112    
-64    96     
80     144    
-64    160    
48     80     
-144   -16    
96     -224   
-336   16     
-48    -208   
160    192    
128    0      
0      32     
0      64     
-768   224    
-32    -16    
-16    48     
80     48     
48     16     
16     16     
80     -32    
16     32     
80     -208   
16     64     
-464   -80    
16     336    
112    -128   
-208   -160   
-80    -160   
-640   -176   
-96    112    
-240   96     
-64    32     
-16    0      
-64    32     
64     -112   
-240   -176   
432    -224   
-96    144    
-144   -16    
16     224    
-160   160    
224    16     
-144   0      
96     32     
-48    16     
0      0      
-112   128    
-304   224    
-96    128    
-224   -32    
32     48     
112    48     
80     128    
-80    -240   
64     0      
80     176    
-176   48     
-48    48     
0      48     
16     96     
-176   -96    
0      128    
32     112    
-112   64     
-224   -48    
48     48     
32     -80    
32     176    
0      -48    
-112   -16    
128    128    
-48    80     
128    256    
-32    64     
-144   -112   
-96    -64    
-64    0      
-64    32     
-224   80     
-528   -144   
-64    80     
-16    -96    
128    96     
-64    16     
32     80     
224    48     
-256   48     
160    96     
-32    112    
32     32     
-16    16     
-208   -320   
128    0      
64     160    
-480   -160   
240    144    
32     224    
160    32     
0      192    
64     208    
-64    32     
-96    0      
144    64     
16     32     
-176   32     
64     16     
-32    48     
-48    96     
16     64     
-192   32     
144    176    
-1120  -16    
128    160    
16     80     
-384   16     
-144   -16    
48     192    
192    80     
-176   32     
48     -32    
-80    -32    
-304   -96    
192    -32    
112    192    
80     128    
144    128    
-832   -64    
48     176    
-80    -32    
80     112    
32     96     
64     176    
-448   32     
112    -16    
160    160    
64     80     
-256   0      
-80    -16    
128    96     
-112   0      
-32    176    
-112   64     
208    80     
-208   -160   
208    -224   
48     144    
-48    -32    
-80    -32    
80     176    
-32    112    
0      -32    
-112   -208   
32     80     
80     80     
16     -96    
64     176    
0      64     
-176   -240   
448    -400   
32     272    
-80    -48    
16     -48    
272    112    
-256   272    
144    320    
-224   -192   
208    416    
-272   -160   
208    160    
-160   16     
80     192    
-48    -80    
16     224    
208    -16    
-256   -48    
96     -512   
96     96     
32     416    
0      176    
352    -128   
-544   -16    
336    176    
0      16     
0      48     
32     80     
0      80     
16     112    
0      32     
48     80     
16     80     
-80    48     
224    112    
-128   336    
-32    -64    
128    32     
32     96     
16     64     
-64    48     
112    80     
-112   80     
256    208    
-336   192    
-16    -128   
272    80     
-400   128    
192    -96    
-224   -80    
224    144    
-112   96     
128    176    
-48    16     
176    144    
-112   64     
32     48     
192    224    
128    240    
80     80     
64     144    
80     32     
0      112    
32     96     
48     64     
-112   -32    
-160   -272   
64     -272   
16     -320   
-32    -336   
336    -432   
96     32     
96     192    
48     48     
144    144    
0      80     
48     80     
-288   -432   
144    -144   
-16    192    
0      64     
-16    80     
48     80     
32     80     
64     112    
-32    -32    
272    -80    
-144   160    
32     144    
-64    192    
-16    112    
192    192    
-80    256    
192    128    
16     32     
-112   48     
0      -80    
160    -384   
-64    16     
288    672    
-240   64     
-80    -272   
80     -32    
32     -416   
64     592    
176    96     
624    256    
32     304    
-96    400    
384    -112   
-96    128    
288    -64    
0      240    
16     -16    
64     608    
32     -112   
128    -256   
-176   96     
144    -496   
240    1184   
-128   176    
144    -16    
-48    240    
-48    192    
0      -640   
160    144    
-128   96     
96     336    
80     368    
64     80     
32     144    
-32    -64    
16     16     
-208   -272   
192    192    
80     0      
-32    -160   
-64    -400   
32     112    
192    -16    
144    96     
80     32     
-48    240    
128    224    
-224   -160   
48     16     
0      -112   
-96    -64    
352    48     
-256   176    
-16    -224   
-96    32     
-64    -1072  
192    32     
144    160    
-144   96     
-112   -48    
0      -80    
16     224    
-32    96     
-128   112    
96     0      
0      112    
128    64     
-112   144    
-64    32     
32     80     
-160   -448   
160    16     
64     96     
144    -16    
-160   32     
128    16     
176    208    
32     -528   
-16    32     
-16    -224   
160    160    
-16    -144   
64     96     
-16    -208   
144    -48    
48     -480   
64     112    
160    0      
-48    80     
-32    0      
304    80     
-192   80     
80     -128   
0      160    
16     -112   
-128   48     
80     0      
336    208    
-32    -128   
-48    64     
-48    -1104  
16     48     
224    128    
32     -928   
64     128    
112    -144   
80     -160   
0      -160   
176    -624   
32     176    
192    112    
-32    -64    
0      144    
96     -144   
-16    48     
80     32     
32     16     
256    224    
-176   -192   
96     -432   
288    176    
-352   -48    
48     -80    
96     -64    
64     64     
128    -1856  
-32    -224   
48     128    
432    416    
-576   48     
192    64     
32     -144   
96     80     
80     -112   
16     48     
-112   -16    
80     16     
16     -16    
240    0      
-144   -96    
176    -112   
-112   -64    
192    -576   
112    0      
0      -48    
208    144    
-208   -176   
128    96     
112    96     
-32    -288   
-272   0      
208    -96    
-352   16     
96     -240   
16     -32    
128    -352   
0      240    
80     -48    
144    32     
32     96     
-112   48     
0      16     
0      64     
-160   -160   
32     -160   
-256   -96    
112    -128   
-1680  -496   
416    -240   
432    528    
-464   16     
48     64     
224    32     
-112   16     
128    -224   
-96    96     
64     -32    
64     -80    
240    -16    
-128   -80    
-192   -64    
256    -112   
-480   48     
368    144    
-320   208    
-32    -112   
-320   -64    
96     -528   
128    64     
-112   16     
-96    80     
176    -80    
-32    -16    
16     16     
-144   -32    
64     48     
112    64     
-48    64     
368    176    
-832   144    
128    -240   
-304   -16    
80     -80    
64     48     
-32    -432   
176    144    
112    16     
32     -144   
16     -48    
176    128    
-176   -64    
64     -16    
-640   -48    
96     -160   
-112   -32    
-96    -240   
64     -48    
96     -80    
16     80     
-64    -432   
32     48     
-240   0      
160    112    
-112   80     
48     16     
-80    32     
112    -32    
-80    0      
48     48     
-816   16     
0      176    
-272   240    
448    -48    
0      128    
144    -32    
-192   -80    
0      -64    
128    -256   
112    144    
-16    -16    
-240   -128   
336    80     
-176   464    
224    304    
-224   0      
96     -384   
-32    -32    
80     -272   
160    192    
-560   64     
-368   -64    
-16    -48    
-512   16     
-240   -64    
-240   -96    
16     -48    
208    -16    
16     16     
-16    -32    
240    272    
-592   176    
160    240    
-448   16     
16     144    
-208   -128   
-192   192    
96     288    
-80    160    
-144   192    
-528   0      
112    80     
-48    -224   
-144   -240   
32     -128   
48     192    
-400   -32    
64     176    
144    -64    
288    112    
16     48     
-160   -16    
-16    0      
-16    176    
-16    352    
-272   -112   
-176   32     
-1184  224    
-304   -800   
-96    -288   
176    496    
-144   48     
48     112    
32     -176   
-192   -336   
240    176    
-416   -32    
240    -304   
-144   576    
176    320    
-272   -240   
64     64     
-336   336    
-144   96     
272    -240   
32     144    
-128   -176   
144    -368   
-176   -288   
32     336    
128    -192   
0      176    
32     160    
16     16     
-80    96     
32     368    
112    160    
-96    176    
80     48     
-432   96     
112    544    
16     368    
64     96     
-80    0      
160    160    
-32    32     
-144   32     
0      16     
-208   -16    
224    64     
-128   64     
80     64     
-48    48     
16     80     
-544   -64    
-64    64     
96     64     
48     -64    
-16    48     
-256   16     
32     144    
-272   0      
48     -80    
32     0      
0      32     
144    272    
-160   320    
-112   64     
0      64     
128    -96    
-144   -304   
-416   -48    
144    240    
-48    112    
-160   16     
224    112    
-48    64     
32     96     
-64    -112   
-64    -48    
192    208    
-160   272    
-80    32     
-48    176    
112    96     
16     112    
-176   -192   
-160   -384   
128    -176   
304    528    
-240   368    
-32    32     
-208   -192   
-128   -240   
80     96     
-96    32     
0      32     
-64    -32    
-48    -32    
32     -368   
160    48     
-128   -32    
-16    80     
0      112    
80     80     
-64    128    
-16    -32    
112    208    
-480   368    
112    -304   
112    -128   
96     1152   
-320   64     
176    -128   
-96    624    
-128   -32    
240    -96    
128    848    
-208   272    
-112   -544   
64     112    
0      -48    
16     16     
32     208    
16     160    
-64    112    
80     112    
0      -16    
272    576    
-208   336    
16     160    
-128   80     
64     64     
-32    176    
-48    256    
96     -16    
-176   -256   
128    -224   
-192   -176   
176    -32    
-416   -848   
144    -288   
208    176    
-80    320    
-112   240    
-128   144    
224    160    
-192   -144   
416    112    
-432   -368   
160    -80    
112    80     
80     144    
-64    -48    
-80    64     
144    16     
0      80     
-16    16     
160    -48    
-304   320    
48     -96    
-352   48     
256    80     
-32    128    
-80    48     
16     112    
-16    -96    
-208   208    
272    -144   
-160   176    
224    208    
-224   64     
96     96     
208    272    
-176   64     
80     128    
176    32     
-208   112    
16     -112   
48     128    
288    224    
-224   64     
32     64     
160    80     
-48    96     
-176   -144   
128    -112   
-64    -48    
-32    -1024  
80     144    
-192   -96    
-96    80     
352    128    
-48    16     
240    224    
-240   288    
-64    80     
-16    32     
192    112    
128    112    
-96    -16    
0      64     
-96    -96    
128    -432   
96     64     
112    -1248  
0      96     
-32    64     
144    112    
48     144    
144    64     
96     192    
0      64     
-112   -32    
288    32     
-48    -32    
16     -32    
128    32     
-112   -64    
96     144    
80     -688   
-64    176    
-112   32     
96     80     
80     16     
96     144    
48     112    
-80    32     
16     -272   
96     112    
-80    32     
112    240    
-48    80     
-96    -352   
144    32     
-64    -816   
176    208    
-48    -1616  
176    -80    
-160   0      
96     96     
-96    32     
32     16     
64     32     
0      128    
-64    32     
32     -80    
368    432    
-304   -32    
48     144    
192    -192   
32     96     
96     -736   
-16    80     
-176   -64    
256    96     
-112   -16    
64     48     
96     128    
144    160    
32     16     
112    48     
0      224    
64     80     
-16    224    
320    112    
-144   32     
304    -160   
-224   160    
240    -80    
-112   160    
-16    48     
128    112    
-96    32     
224    288    
-128   304    
-32    -192   
112    192    
96     -208   
176    224    
96     -800   
96     64     
64     -160   
64     64     
48     -160   
64     80     
48     112    
-80    -224   
96     -416   
48     144    
272    112    
-112   -176   
208    144    
176    -240   
-48    176    
112    -336   
-208   80     
96     16     
-96    96     
224    -944   
16     112    
-48    32     
176    32     
48     -32    
96     48     
32     32     
-240   -176   
512    144    
-64    -144   
160    96     
80     48     
16     144    
128    -32    
16     32     
-112   -112   
256    -80    
176    288    
-48    0      
-128   128    
176    -240   
160    -784   
16     -48    
64     -576   
48     0      
0      208    
144    32     
80     80     
-32    -144   
160    -1680  
32     320    
-64    -656   
80     -672   
176    -384   
208    -96    
-576   -448   
192    -304   
176    0      
112    96     
-16    48     
176    -96    
-16    -80    
96     128    
-32    -96    
64     -240   
160    -16    
-32    -112   
80     128    
160    -192   
416    768    
384    384    
-128   0      
64     80     
-32    -48    
304    -96    
96     -160   
32     -32    
496    -960   
64     400    
-16    80     
176    864    
368    368    
-80    352    
-336   -96    
176    -272   
-224   32     
336    -160   
-368   -16    
96     -448   
240    -32    
64     -144   
32     -48    
-64    -160   
224    112    
64     -176   
176    272    
32     96     
48     256    
-272   -48    
112    128    
-32    16     
-112   -160   
-464   -240   
336    208    
-112   288    
-352   -704   
208    -352   
80     96     
-16    -80    
96     -1072  
-80    224    
96     0      
-80    -80    
-32    192    
96     -192   
-256   240    
48     -416   
304    -48    
32     112    
-176   160    
208    -64    
-192   16     
80     -624   
256    64     
0      -48    
96     160    
176    0      
176    -32    
-432   -80    
224    -144   
-192   -16    
-32    -64    
-240   64     
80     128    
-912   -176   
-112   -160   
-16    -80    
64     -592   
272    448    
32     384    
48     0      
-16    -80    
96     -96    
-144   32     
-224   -448   
-224   -480   
288    -32    
-352   288    
352    256    
-688   448    
208    96     
48     240    
112    320    
32     -144   
96     -96    
16     112    
-208   -240   
-112   -64    
176    -480   
48     -80    
-112   48     
272    128    
-320   16     
224    -16    
0      80     
64     16     
144    32     
112    -144   
112    64     
-48    -288   
128    -96    
48     48     
0      48     
96     64     
-304   -32    
128    -64    
-144   -304   
320    320    
-112   384    
-176   -64    
-80    -256   
48     64     
-1616  -528   
64     32     
-368   176    
112    240    
-32    128    
-848   0      
-64    -144   
-272   112    
96     64     
-16    112    
-16    144    
-96    112    
-160   240    
-224   -304   
64     32     
-480   -352   
112    -48    
-64    32     
80     -368   
-80    288    
-32    0      
32     208    
16     144    
416    432    
-800   -560   
-16    -944   
176    112    
-64    640    
-32    -368   
160    208    
-144   144    
112    -16    
-96    -96    
-112   -96    
-272   -144   
112    -400   
112    432    
-48    -128   
-32    32     
-976   -64    
64     32     
-224   -64    
48     80     
-32    -16    
-48    160    
-48    -144   
-112   -448   
48     -224   
-128   96     
96     -16    
144    368    
160    320    
-48    224    
-64    -16    
-544   -208   
96     -80    
-464   -80    
48     64     
32     -32    
32     96     
-160   -64    
-80    32     
80     80     
32     224    
-96    16     
-16    -224   
-176   224    
-16    -32    
-32    -80    
80     -64    
160    48     
-144   -64    
32     112    
96     0      
64     384    
-224   32     
32     -112   
16     96     
144    128    
-240   48     
48     64     
64     96     
-80    -16    
-16    48     
-64    -48    
320    576    
-544   208    
-96    0      
16     -128   
144    16     
192    224    
-192   176    
-144   64     
-80    -112   
64     32     
112    192    
-96    208    
-64    0      
-16    48     
-176   -96    
-64    -16    
-176   32     
144    176    
-256   80     
-48    176    
96     112    
48     -32    
0      16     
-80    64     
320    176    
-160   48     
16     208    
-144   -16    
-176   -32    
-128   -96    
80     0      
-624   -512   
288    -80    
-336   -224   
-208   0      
160    48     
-96    64     
80     96     
-144   208    
48     48     
-96    32     
112    160    
-272   -80    
48     -112   
64     -32    
304    240    
-192   176    
32     208    
128    -32    
112    32     
128    80     
-80    0      
-80    0      
80     80     
16     112    
240    144    
-240   0      
96     112    
240    112    
-176   -112   
-96    64     
-144   -64    
-32    112    
160    112    
-32    16     
96     64     
-176   48     
224    128    
-112   -16    
0      -96    
96     96     
32     80     
80     64     
-48    144    
-144   -32    
-16    160    
-80    96     
-16    -176   
-144   80     
320    64     
-128   -192   
-256   160    
320    48     
-144   48     
16     112    
0      32     
192    16     
-272   -64    
0      48     
-48    96     
192    128    
-128   176    
32     128    
208    96     
-64    -32    
-16    0      
48     48     
80     96     
176    32     
-256   64     
96     224    
-32    96     
-32    0      
80     128    
176    160    
-320   128    
160    80     
0      96     
-64    48     
128    64     
112    144    
-16    144    
112    80     
16     32     
-16    48     
-64    -32    
80     48     
-64    -48    
80     176    
-64    80     
-48    -1168  
0      144    
32     96     
32     128    
-16    96     
32     64     
80     -16    
96     48     
32     48     
32     80     
32     96     
96     16     
-32    80     
48     48     
-32    -48    
16     -240   
-16    160    
80     96     
192    272    
-16    208    
-64    192    
96     176    
128    64     
96     128    
208    208    
0      208    
208    256    
-352   -160   
320    0      
-48    80     
144    -80    
0      96     
-208   -1152  
64     -112   
320    160    
-128   160    
224    176    
-256   96     
-32    -464   
-16    -128   
128    64     
0      160    
16     16     
144    208    
-96    112    
128    -64    
-176   -96    
256    -656   
-256   16     
48     -528   
0      672    
-16    48     
112    64     
0      -48    
32     -32    
48     -16    
112    144    
-96    48     
112    16     
80     96     
112    416    
64     -336   
-160   -1008  
112    192    
80     -2144  
-144   176    
32     -16    
-32    96     
240    208    
-112   128    
96     -176   
160    320    
0      80     
80     -16    
112    80     
16     64     
80     304    
16     -160   
176    64     
-64    -368   
16     48     
-32    -192   
0      96     
-96    64     
64     -352   
320    32     
0      304    
256    240    
-144   -176   
128    -176   
-48    64     
80     0      
160    -688   
0      208    
224    -416   
-272   224    
80     -176   
16     128    
0      80     
0      -368   
-48    336    
176    32     
-64    -160   
-64    112    
-48    -192   
112    272    
144    496    
48     -448   
-176   96     
-240   -512   
192    352    
-48    0      
32     176    
-16    160    
224    80     
16     208    
-64    -96    
-144   -512   
336    64     
288    928    
-320   -640   
432    -64    
-160   368    
304    -144   
-272   -336   
480    -480   
144    640    
-176   112    
-96    -704   
160    112    
192    176    
-320   64     
416    -592   
-224   16     
112    352    
0      -432   
96     0      
0      -208   
512    192    
-368   0      
304    128    
32     -464   
64     -832   
16     16     
240    -16    
-96    -176   
-512   -208   
-32    -688   
192    -224   
112    -464   
48     -256   
0      192    
304    112    
-208   -192   
-48    -432   
240    -752   
-48    752    
240    -576   
-176   -928   
272    640    
-64    -304   
-576   48     
96     -272   
-32    -48    
160    -304   
192    688    
-224   64     
336    -272   
-352   -1024  
48     -496   
192    656    
112    384    
-64    208    
