# Supplementary material for: A Fault Diagnosis Method for One‐Dimensional Vibration Signal Based on Multiresolution tlsDMD and Approximate Entropy
Source: Hindawi journal article supplement (doi:10.1155/2019/3262818), 2019-01-01
Supplement: f1 [file 3262818.f1.zip › 3262818.f1/gear signals/wear gear signal/Data12.txt]

-128   -32    
-48    -144   
208    -16    
-112   -208   
352    144    
80     112    
48     176    
-224   112    
-64    -16    
-32    -80    
-80    32     
16     -144   
-112   32     
-656   -224   
0      -96    
128    -912   
-384   -544   
384    -336   
-144   -400   
96     -208   
-192   -256   
144    -320   
-160   -64    
48     320    
-96    384    
-16    48     
-272   -64    
-208   0      
16     112    
-48    0      
0      96     
-64    -160   
208    320    
272    -224   
-96    -176   
-80    112    
16     -336   
-304   16     
0      32     
-144   48     
112    -16    
-112   -48    
-112   32     
-64    80     
32     112    
-624   176    
64     -112   
-32    64     
496    -208   
-224   0      
-48    80     
144    16     
-208   48     
176    0      
16     0      
144    16     
0      112    
-32    64     
128    80     
-1424  -48    
80     240    
-656   -192   
-80    80     
-464   -64    
-208   -16    
32     16     
-352   48     
32     32     
-304   -64    
-96    -112   
192    -208   
48     64     
224    128    
64     -176   
-720   -128   
16     80     
-240   -32    
160    64     
-48    48     
-96    80     
-96    -48    
-192   -96    
-64    32     
-192   -16    
-96    -64    
-960   -80    
-96    80     
80     0      
-288   16     
-208   -208   
160    112    
64     -80    
48     192    
-32    128    
-160   -48    
-48    48     
-48    64     
0      64     
-48    64     
32     64     
-368   16     
-80    -16    
160    32     
-96    144    
80     32     
80     112    
-160   -144   
64     64     
0      -80    
-192   -224   
144    -32    
-160   -80    
240    96     
-304   -48    
48     64     
-528   0      
480    400    
-1424  208    
336    112    
-336   -368   
256    224    
0      -48    
-160   240    
240    576    
-16    352    
32     240    
-32    64     
-96    -32    
32     16     
-64    176    
-48    48     
144    16     
-416   -192   
160    0      
0      -64    
-32    96     
96     112    
-16    -256   
176    160    
-112   192    
-144   -192   
16     -32    
64     224    
64     32     
208    1040   
-112   -496   
64     528    
-256   320    
48     -432   
32     -144   
-128   80     
-96    272    
-112   496    
-80    0      
-128   -160   
-96    144    
-176   -80    
112    -16    
-80    160    
224    112    
-304   48     
0      64     
-192   64     
-32    -288   
-592   16     
-144   48     
-32    48     
32     64     
-80    64     
-80    48     
176    160    
-272   -32    
0      -512   
-112   -176   
-112   -80    
-208   -16    
-96    192    
-80    0      
80     192    
-80    240    
64     -64    
-256   -16    
304    0      
-80    64     
48     16     
-32    64     
-32    160    
672    528    
-496   592    
-32    128    
-208   -112   
208    448    
592    656    
32     656    
48     208    
-48    -80    
-80    80     
208    0      
-112   208    
240    -16    
-112   96     
80     80     
-128   64     
96     80     
160    272    
144    128    
-128   64     
-272   -272   
192    -96    
128    -64    
128    -64    
-272   -400   
48     -240   
-48    -144   
-240   -128   
-112   -288   
16     32     
48     -128   
-176   -240   
240    96     
192    192    
-144   592    
-208   208    
128    192    
-240   -48    
-160   -96    
144    64     
16     -64    
-304   0      
-304   128    
192    80     
32     128    
-224   -272   
-128   -48    
128    304    
-240   -176   
-32    288    
208    -112   
-64    144    
-32    384    
80     -608   
-208   -432   
-96    160    
112    128    
-208   112    
96     240    
304    352    
-288   240    
224    -160   
-224   192    
1056   640    
-560   1088   
-80    -1136  
224    -48    
48     624    
-128   -432   
-32    -80    
-32    -96    
-48    48     
16     224    
-64    -448   
-112   768    
368    256    
-320   -224   
208    80     
-48    112    
80     304    
-80    -224   
-224   -304   
128    240    
-16    432    
96     448    
64     112    
-128   16     
64     48     
-32    128    
144    16     
96     -80    
96     128    
144    144    
-208   -368   
96     -48    
128    432    
-32    256    
96     80     
176    80     
16     0      
352    352    
-144   288    
160    128    
176    176    
-32    208    
-64    -32    
-48    -16    
192    80     
-208   0      
240    -16    
-48    160    
0      -544   
-80    48     
144    16     
-48    -224   
192    -64    
0      80     
-32    64     
224    128    
-176   32     
64     64     
80     80     
-112   80     
176    96     
-272   16     
-32    96     
32     -1216  
80     64     
80     240    
-16    144    
96     48     
16     96     
144    192    
-256   48     
112    32     
-80    96     
48     80     
-80    48     
80     32     
-160   -224   
144    -32    
16     -112   
0      64     
-80    -208   
160    -32    
-80    -176   
176    96     
-64    48     
16     16     
-48    80     
-64    -96    
64     -112   
128    -16    
112    368    
-32    -192   
112    16     
96     -80    
176    96     
-96    -336   
48     80     
96     -208   
-144   320    
48     0      
-48    32     
176    48     
-80    128    
208    64     
-80    -160   
48     96     
64     -16    
384    144    
-224   -64    
64     48     
0      -496   
32     80     
48     64     
32     96     
48     112    
192    32     
-32    64     
96     -16    
0      16     
48     -16    
96     144    
0      -128   
48     16     
-32    -208   
96     32     
112    -464   
112    272    
0      -112   
176    144    
-96    48     
96     16     
-48    208    
272    48     
-368   80     
176    -176   
80     112    
-192   -224   
96     -80    
-160   -400   
368    160    
-288   32     
160    96     
-192   -128   
112    -112   
-144   -32    
384    -80    
-304   48     
-96    48     
224    -16    
240    48     
-144   -864   
96     -64    
80     144    
-16    64     
0      96     
96     -32    
112    -16    
-128   -176   
-16    -128   
-48    -416   
-16    -1424  
208    112    
-448   128    
-16    -128   
192    -16    
-176   -992   
80     48     
-48    -512   
160    16     
-304   144    
192    -16    
-96    -16    
-64    80     
240    80     
-32    0      
176    -96    
-176   -96    
-336   -176   
16     -240   
144    0      
192    -128   
-48    48     
304    -224   
0      -32    
16     -2720  
144    -240   
16     -112   
336    112    
64     0      
-48    80     
128    -96    
48     -16    
-336   -96    
-16    -48    
-448   -16    
256    112    
80     48     
-64    0      
32     -144   
32     -1312  
112    -144   
80     -32    
176    128    
0      -112   
-96    64     
112    128    
-48    -96    
-64    0      
144    16     
-544   0      
-16    -144   
144    16     
48     -272   
16     48     
208    -240   
-224   48     
176    432    
-144   -16    
64     -224   
288    48     
48     64     
16     -16    
-144   -16    
48     -400   
-240   -208   
48     -336   
-1424  -32    
112    -32    
80     -32    
96     -160   
224    256    
-144   -1600  
-96    80     
32     112    
208    80     
160    112    
0      -16    
-96    -32    
176    -48    
-96    80     
64     64     
-160   128    
32     64     
0      -16    
176    -128   
-32    192    
-32    288    
208    320    
224    -240   
-144   -256   
48     736    
-96    -208   
192    -240   
-48    384    
-128   -48    
96     -32    
-96    32     
144    -80    
-240   16     
32     -64    
64     48     
112    -240   
48     80     
160    -80    
160    448    
-816   240    
192    -592   
176    944    
-16    -288   
-80    176    
96     -224   
-48    -208   
112    16     
0      48     
-64    -64    
240    -176   
-96    -32    
208    16     
-80    -288   
160    864    
-64    -160   
32     -208   
32     208    
80     0      
-368   16     
96     -64    
-16    0      
224    160    
-96    416    
-256   -512   
-32    -96    
-768   -144   
-1088  -16    
16     128    
-960   48     
192    304    
-16    -224   
16     -128   
-144   -336   
-32    -304   
96     -192   
-80    272    
96     -32    
-64    224    
-96    -208   
-48    64     
0      -16    
-240   272    
-16    -96    
-176   -16    
-96    0      
-208   -32    
-112   -16    
144    80     
16     80     
0      -16    
-64    432    
240    -80    
-160   16     
-64    -240   
-80    32     
64     208    
-96    96     
-224   -224   
80     0      
-80    256    
-144   224    
528    352    
-160   320    
0      -48    
-80    -128   
-32    -48    
-272   -224   
-240   -128   
-48    -128   
-32    64     
-112   -16    
-160   160    
-64    80     
-288   -96    
-80    240    
224    16     
-64    192    
-560   -240   
128    0      
-48    -48    
-16    192    
16     128    
128    320    
112    48     
-144   32     
112    0      
-288   0      
48     -80    
-208   -128   
-48    16     
-144   144    
96     256    
-560   -48    
224    -80    
-560   16     
-80    192    
-32    -208   
192    -80    
-96    32     
-128   352    
80     752    
128    -16    
32     -64    
-176   48     
80     0      
-112   -96    
-112   16     
304    480    
-400   -496   
80     -256   
-160   -208   
-528   -464   
0      -48    
48     704    
224    0      
-208   -560   
64     48     
128    128    
-208   432    
384    960    
16     368    
-128   336    
-48    -32    
-176   -240   
-528   -400   
80     -64    
-1792  128    
-320   32     
-96    208    
80     -80    
-288   -512   
-160   -448   
16     -112   
-96    80     
48     16     
-176   -80    
128    -48    
-224   -112   
336    160    
-304   -160   
112    16     
-736   -96    
240    48     
16     64     
-48    -48    
-64    -176   
176    64     
368    224    
-208   160    
208    368    
176    176    
-336   16     
80     -32    
64     112    
-96    80     
0      -32    
-176   16     
112    -64    
-96    16     
0      -288   
320    -64    
32     160    
288    112    
-176   -48    
96     80     
-48    0      
0      128    
176    256    
-80    128    
-192   32     
48     32     
64     112    
144    32     
-80    0      
144    0      
-32    96     
48     32     
16     0      
-272   -48    
48     64     
16     112    
-64    -16    
-176   64     
336    160    
-272   -176   
64     32     
32     96     
-112   144    
256    64     
-80    64     
144    368    
-32    -48    
16     112    
176    160    
80     32     
-112   32     
160    192    
-176   0      
-48    80     
32     -16    
-80    16     
96     144    
-32    112    
144    32     
-80    64     
0      48     
-144   16     
80     160    
160    80     
-48    96     
128    112    
64     80     
-176   -48    
176    80     
32     48     
-16    80     
-112   -16    
128    48     
16     -80    
0      48     
48     112    
-32    96     
48     112    
16     16     
64     96     
-208   32     
64     48     
-192   -80    
288    96     
96     80     
-240   32     
176    -96    
-48    96     
128    144    
80     64     
-160   128    
48     80     
32     112    
-144   -112   
352    -128   
-128   32     
160    192    
-96    160    
48     16     
16     48     
-16    -112   
112    32     
32     176    
96     128    
0      160    
144    96     
-16    64     
64     64     
-32    0      
192    112    
64     64     
-48    176    
-112   48     
48     -288   
-112   128    
-96    -704   
0      -16    
192    160    
-96    64     
96     -32    
48     112    
-32    16     
-48    -32    
128    192    
160    32     
32     -32    
96     128    
48     48     
64     -192   
48     64     
48     -464   
0      128    
112    192    
32     144    
80     96     
-144   192    
160    96     
-144   96     
64     64     
80     192    
-240   96     
64     32     
96     64     
-176   -48    
320    -160   
16     -224   
112    144    
0      -272   
-16    16     
432    0      
16     272    
-112   -48    
384    256    
-80    80     
-112   -80    
-16    80     
96     -128   
-16    -16    
128    -80    
192    208    
-192   -464   
64     -16    
224    -448   
16     32     
128    256    
-16    64     
32     -32    
32     96     
-160   -16    
176    80     
16     80     
160    -32    
0      16     
352    16     
-304   176    
0      -96    
-32    16     
240    -240   
112    144    
-144   -1248  
48     16     
176    -16    
-16    80     
16     96     
128    224    
-48    240    
-48    -144   
112    208    
208    -32    
240    304    
112    0      
-48    64     
208    -288   
-48    80     
48     -112   
80     112    
64     64     
48     -80    
-160   -240   
48     -48    
-112   144    
128    320    
80     16     
80     32     
0      128    
-16    -208   
48     112    
224    80     
-64    416    
0      -48    
80     160    
192    32     
-144   176    
80     32     
80     240    
16     -272   
-80    -592   
-32    448    
-80    16     
-80    32     
-16    -304   
112    96     
48     176    
192    -256   
64     192    
64     96     
48     112    
32     -832   
-16    144    
-608   176    
272    144    
-160   32     
-224   -976   
96     -912   
64     432    
16     336    
352    16     
-256   16     
96     -96    
144    16     
-32    -224   
64     64     
-16    -64    
64     16     
-464   -64    
64     -48    
32     -112   
-96    -224   
288    -32    
32     -368   
-32    -80    
288    0      
0      -32    
112    -416   
32     192    
208    -80    
-32    80     
-96    -368   
144    -128   
-464   80     
-160   -16    
-48    64     
-64    -160   
16     -64    
16     -96    
128    0      
16     -1120  
-64    -16    
160    -96    
0      144    
288    128    
-112   96     
32     -48    
64     -192   
-16    -64    
0      16     
-496   0      
64     -48    
80     400    
128    -256   
112    -144   
-128   -1152  
0      144    
160    416    
-496   128    
336    -160   
-176   -48    
-128   -80    
16     -16    
-96    64     
-208   -288   
16     -176   
48     -224   
16     -176   
16     -400   
-272   80     
128    -224   
-160   80     
224    -1536  
160    304    
-48    208    
176    64     
-16    32     
96     224    
-112   32     
192    176    
-272   112    
-80    -80    
-448   -48    
80     -48    
-336   -480   
576    32     
80     848    
0      -288   
144    -160   
0      -208   
192    448    
272    608    
-208   -64    
-256   -256   
-240   96     
-48    -112   
-192   -384   
-48    96     
-64    -112   
80     -16    
-240   -512   
224    592    
-16    -1328  
-16    48     
256    144    
32     48     
-288   512    
240    -544   
-208   -432   
272    176    
-64    -304   
176    64     
0      256    
144    304    
208    64     
-80    -512   
0      -64    
16     -416   
-80    32     
-64    208    
32     128    
-352   -96    
112    0      
-16    64     
240    -208   
-128   -176   
80     -240   
-160   16     
96     -160   
-192   -144   
-96    -192   
176    0      
-1920  -112   
-304   80     
-224   96     
32     240    
-192   112    
32     112    
80     64     
-192   -64    
16     -96    
336    96     
-400   64     
-624   -112   
-48    -240   
-288   144    
-80    192    
-400   16     
-96    -128   
-112   32     
-48    112    
-176   128    
-448   64     
-96    16     
96     96     
-48    -80    
160    80     
16     -16    
-640   -96    
64     -64    
-80    -208   
16     192    
32     64     
-80    0      
112    80     
-64    32     
16     16     
-176   -16    
-48    -64    
0      80     
192    112    
128    -16    
0      64     
-16    16     
64     -112   
-80    -32    
-80    32     
-16    48     
-112   16     
-16    144    
-304   -272   
192    -304   
-96    192    
112    96     
-48    64     
112    80     
-160   -128   
-64    112    
48     -128   
-32    16     
-48    -128   
352    240    
-256   32     
80     -64    
-96    16     
48     64     
-96    32     
-16    112    
96     0      
-384   -32    
-64    32     
-1040  -112   
80     0      
48     16     
-80    -112   
128    48     
16     192    
-256   -16    
-32    16     
-64    16     
64     32     
128    48     
-288   64     
624    192    
-608   -48    
176    48     
-336   48     
64     96     
176    224    
-224   112    
-48    16     
-96    -32    
16     48     
32     48     
-128   32     
48     -32    
-32    32     
32     32     
-32    80     
-192   64     
224    32     
-176   64     
-96    -96    
-128   0      
48     64     
-32    80     
240    48     
32     0      
0      96     
160    272    
-352   64     
-64    112    
176    112    
-96    32     
16     -80    
112    48     
-400   -160   
48     -96    
-432   -160   
192    -32    
272    320    
-256   -16    
-192   192    
512    304    
-144   96     
-64    16     
224    112    
-112   0      
128    32     
-96    48     
-16    -16    
-208   -80    
128    224    
160    48     
-176   144    
368    128    
-288   -128   
160    48     
-96    48     
-16    128    
176    48     
-128   176    
144    -144   
144    144    
-320   32     
128    96     
-176   48     
288    160    
-208   80     
16     -64    
144    48     
-112   -32    
352    32     
-144   128    
112    80     
64     32     
-48    80     
-48    -16    
-96    64     
16     -64    
-16    64     
-112   64     
-192   -128   
272    96     
-160   96     
112    64     
-32    144    
160    112    
64     96     
-192   128    
16     16     
16     128    
-32    96     
0      96     
0      48     
160    144    
-224   -48    
-64    16     
32     48     
80     48     
80     176    
80     -64    
-208   -240   
160    -560   
-208   -144   
464    256    
-32    128    
-112   -32    
64     -112   
16     -16    
256    -48    
-160   16     
-16    0      
-80    64     
336    144    
-304   336    
112    144    
96     128    
0      -48    
-144   32     
96     -16    
192    208    
-272   160    
32     -16    
-96    -160   
256    128    
-96    48     
-176   64     
160    -16    
32     -96    
160    64     
-16    272    
256    304    
-352   272    
160    96     
-240   80     
16     16     
-80    -48    
208    128    
80     -192   
208    -16    
-272   -224   
-64    -48    
-304   -432   
0      240    
128    992    
-96    176    
80     288    
-128   144    
-16    16     
144    32     
-16    96     
96     32     
112    128    
-32    96     
-16    -560   
-112   -208   
128    208    
256    -80    
-176   -128   
192    720    
-16    784    
32     -208   
-336   -16    
224    80     
-160   0      
192    112    
-160   -64    
80     272    
-240   -208   
224    -640   
80     176    
-80    -496   
32     -48    
32     -80    
176    272    
32     320    
272    320    
16     688    
-160   256    
288    -16    
-144   368    
0      -192   
32     16     
64     128    
64     -160   
48     256    
0      48     
32     144    
80     144    
0      -64    
208    304    
144    608    
-64    176    
64     80     
208    96     
-112   48     
128    0      
16     -96    
112    96     
-128   -48    
32     128    
64     -208   
-48    32     
32     -1280  
16     96     
64     16     
48     -224   
-288   -416   
128    -240   
192    16     
-176   80     
-32    128    
80     -96    
32     176    
144    -96    
-112   -112   
288    -208   
-96    144    
64     -304   
-240   16     
336    -432   
-48    352    
-192   -208   
224    -48    
48     -32    
-96    96     
160    128    
64     -16    
272    192    
0      -48    
16     128    
144    -432   
64     32     
144    -96    
-64    176    
80     0      
16     128    
304    416    
-192   352    
112    -80    
64     112    
80     496    
400    192    
80     368    
0      -176   
144    48     
64     -240   
48     64     
-96    -160   
224    544    
64     -976   
-32    64     
48     144    
-64    176    
64     0      
0      -192   
32     96     
160    -80    
0      672    
144    192    
-256   -864   
624    -208   
-112   832    
32     -544   
336    256    
-128   496    
272    -16    
96     752    
16     -160   
-336   -464   
-96    -128   
80     -144   
48     64     
112    -448   
112    224    
-32    224    
96     -32    
160    96     
176    288    
16     224    
80     176    
-112   -416   
96     -64    
16     -128   
-144   -288   
-480   -336   
0      -592   
208    -80    
-48    -544   
176    -224   
-352   -2528  
368    -208   
224    192    
48     80     
64     112    
-128   -16    
256    -224   
-48    128    
256    -128   
-448   448    
400    336    
-144   -80    
128    -128   
-64    16     
240    -96    
128    -48    
32     -128   
160    -288   
-400   -512   
496    -192   
-112   160    
48     -48    
-48    48     
96     80     
-16    -48    
-192   0      
-272   -224   
160    -96    
-96    32     
208    -112   
-32    -256   
112    -32    
-80    -528   
-96    -64    
160    64     
176    144    
-400   48     
240    0      
-176   176    
176    -208   
-336   32     
256    -128   
-608   -32    
48     -64    
48     -96    
384    -112   
0      -80    
64     -560   
48     48     
-48    -896   
96     112    
48     -80    
-144   -48    
-80    -48    
16     192    
-112   -64    
64     128    
-192   -112   
112    -32    
-1824  -16    
64     -80    
32     48     
112    -256   
80     80     
0      -672   
-80    32     
256    -32    
-112   -64    
64     160    
-192   32     
-64    48     
80     16     
-128   0      
-80    -80    
-128   64     
0      -48    
-304   0      
272    0      
160    176    
-48    -384   
208    144    
48     16     
32     -96    
-16    64     
176    112    
112    -128   
16     -160   
-368   -16    
128    -112   
80     176    
-160   -96    
-448   -16    
96     -288   
96     48     
48     -448   
160    112    
-32    -48    
208    336    
-272   -80    
32     64     
-64    32     
80     80     
-272   -16    
64     48     
-192   16     
176    -96    
-32    -160   
128    -304   
-80    96     
368    64     
-208   16     
-128   -64    
224    144    
-384   80     
16     96     
416    176    
-208   -16    
16     -96    
160    -112   
-48    -32    
0      -144   
-80    -64    
-208   -80    
-128   -32    
32     -160   
-528   -112   
-96    80     
-528   -208   
128    176    
-688   -32    
-112   128    
160    -64    
-320   0      
288    288    
-352   192    
-336   -64    
208    80     
128    -64    
96     224    
80     -16    
64     16     
16     0      
0      32     
-32    -16    
-48    16     
-16    96     
-1072  -304   
48     -384   
16     80     
208    32     
-144   -32    
208    112    
-112   -256   
-32    160    
80     64     
-192   64     
48     80     
-352   64     
272    48     
-384   32     
-32    96     
-672   -64    
-48    -32    
192    64     
-16    96     
-256   -64    
352    128    
-80    -32    
48     48     
-48    48     
-176   -64    
240    -80    
-272   64     
80     224    
-144   64     
-32    0      
-160   112    
128    224    
-2000  32     
-96    -64    
-48    -224   
176    80     
-144   -128   
16     64     
96     112    
-304   16     
-32    -16    
-192   -32    
144    -112   
368    672    
-192   832    
-256   192    
96     112    
-256   448    
-96    320    
-192   -80    
144    -128   
224    32     
-144   32     
-32    80     
-16    64     
80     96     
16     224    
-80    240    
16     48     
-48    96     
-320   -240   
144    160    
-624   480    
256    176    
-128   -32    
224    240    
-224   176    
16     64     
96     272    
-208   576    
32     496    
48     320    
-160   464    
-240   336    
-112   240    
-80    -80    
64     112    
-240   -304   
-192   -352   
-928   -336   
80     0      
-176   192    
32     96     
48     96     
224    176    
-208   -80    
96     -208   
16     -48    
144    -368   
96     -320   
192    688    
-304   240    
32     -256   
-16    208    
-432   320    
-96    -352   
512    400    
-112   1136   
96     176    
-240   -336   
160    528    
-256   112    
32     -272   
32     224    
32     -128   
112    144    
64     -32    
-224   -96    
16     256    
112    -64    
16     32     
16     288    
0      -64    
-32    0      
-96    -32    
144    144    
16     -16    
-96    80     
272    80     
-224   48     
-416   -48    
272    64     
-240   -64    
16     -32    
128    0      
16     48     
-144   -32    
-96    144    
144    608    
192    80     
-112   144    
32     -64    
-64    -32    
0      144    
0      16     
176    320    
-432   -144   
80     -432   
-256   -624   
-80    -528   
32     32     
16     -176   
0      -384   
32     -224   
80     224    
16     384    
112    432    
-112   144    
-16    336    
208    -48    
-96    160    
32     112    
80     144    
-192   16     
64     48     
128    144    
-48    0      
80     80     
16     64     
80     64     
0      32     
-16    0      
48     80     
-16    64     
176    32     
-352   48     
256    -128   
-128   0      
336    368    
-176   32     
-96    -432   
-16    32     
112    16     
160    320    
64     704    
112    528    
64     192    
-256   -112   
416    80     
-240   304    
16     -96    
0      160    
0      -16    
64     -64    
0      -112   
272    -16    
64     416    
32     256    
64     336    
112    -48    
128    784    
-192   -144   
288    -160   
-240   32     
112    -48    
16     304    
48     704    
352    1040   
-432   -64    
-144   -928   
96     416    
-16    96     
-16    48     
112    32     
-112   32     
96     352    
-32    -160   
192    64     
-336   -800   
48     208    
32     336    
32     -400   
160    128    
-48    -2160  
176    -80    
-32    -112   
32     -16    
208    352    
0      192    
-304   -720   
64     -272   
144    -144   
16     -16    
-176   -96    
128    160    
-16    240    
-240   -256   
48     -96    
96     -160   
-48    16     
64     0      
128    80     
128    176    
32     128    
-80    256    
128    96     
0      32     
-224   0      
416    0      
-288   32     
-32    32     
-64    -384   
192    -32    
-16    -336   
48     48     
32     -2336  
0      -32    
240    80     
-48    112    
32     -96    
64     240    
48     288    
-128   288    
-16    -48    
-32    -160   
64     80     
-80    -80    
0      -208   
256    -512   
-32    112    
112    -304   
-128   48     
0      -672   
96     16     
0      80     
-96    80     
48     -32    
-32    -80    
176    -16    
160    -16    
32     128    
48     0      
-16    144    
64     -560   
-48    16     
144    -416   
16     64     
-16    -192   
32     160    
32     16     
128    -16    
32     64     
64     80     
-16    96     
240    -192   
-80    48     
336    -528   
96     240    
-496   64     
256    272    
128    80     
-16    112    
208    -608   
-112   16     
-80    -48    
64     48     
0      16     
64     48     
208    192    
-32    -112   
64     -16    
96     -416   
288    272    
-192   -80    
-224   272    
208    -64    
96     272    
32     -128   
-80    112    
-112   -16    
160    208    
32     80     
304    96     
-176   -1952  
128    -32    
176    64     
-112   -224   
-32    16     
-48    -16    
-128   80     
96     -112   
80     32     
-32    64     
-80    32     
240    128    
-64    -176   
96     -496   
256    -48    
64     -768   
128    -64    
-16    -384   
-48    -176   
-16    -1200  
80     -112   
112    96     
0      -16    
352    224    
-272   80     
0      -128   
-80    96     
80     -352   
-32    0      
-752   16     
16     32     
96     48     
80     -48    
32     -224   
96     -192   
16     -48    
32     96     
-48    -32    
112    -48    
16     144    
-144   -80    
112    128    
-224   -16    
128    -80    
0      16     
64     -32    
16     -64    
80     -144   
-80    0      
448    32     
-240   160    
128    -64    
256    -16    
-384   -16    
32     32     
32     32     
64     48     
-16    48     
16     -48    
-144   0      
144    -80    
-144   -96    
16     -160   
-64    -224   
224    -112   
80     -32    
32     -560   
-144   -112   
96     -144   
64     64     
48     96     
-32    -48    
-192   -64    
32     -64    
-160   16     
48     96     
-240   0      
80     0      
32     -64    
192    -16    
192    80     
-16    -368   
-80    128    
48     -160   
112    112    
-64    16     
48     -96    
-112   32     
48     0      
16     128    
96     256    
-128   16     
-144   -128   
240    64     
-144   -256   
-32    -96    
256    -848   
128    0      
112    32     
32     176    
16     288    
0      -64    
128    48     
-16    -80    
0      48     
16     -144   
-320   16     
224    64     
-384   224    
144    -288   
96     -144   
256    80     
160    -176   
-32    -128   
160    -16    
0      112    
128    112    
-80    192    
-80    -128   
-128   32     
112    16     
-192   -176   
0      -160   
256    304    
-304   -640   
176    352    
-32    -80    
0      -288   
208    208    
16     -32    
128    176    
-96    -112   
272    -160   
32     96     
-16    64     
176    -64    
-80    -32    
48     48     
0      -16    
144    -336   
256    288    
112    -32    
-32    112    
-608   -128   
-896   -208   
-96    80     
-1584  16     
-144   784    
32     -320   
-304   -416   
192    240    
-128   384    
-48    64     
-256   -416   
-816   -272   
144    112    
32     -192   
112    208    
-384   32     
64     -208   
32     160    
-448   32     
-96    416    
-368   -16    
80     160    
-160   416    
-320   -208   
-992   -976   
-320   -592   
48     -336   
80     160    
144    560    
-592   -304   
208    -384   
-192   448    
-336   128    
128    -256   
144    224    
272    208    
-80    288    
-1520  -496   
48     -640   
256    448    
16     784    
16     -112   
-80    -208   
80     -352   
-272   -208   
432    80     
-96    768    
0      208    
-64    -288   
-32    480    
80     256    
-384   -144   
-112   -560   
-208   -192   
-112   64     
208    32     
-272   -80    
224    32     
64     -80    
-384   80     
304    64     
-32    16     
48     80     
-96    48     
-128   48     
-176   -128   
128    -192   
112    304    
-128   720    
-432   -336   
-32    -656   
48     80     
0      256    
-80    64     
224    208    
-272   80     
0      -144   
32     272    
128    1008   
-80    -512   
-112   -96    
160    -32    
-160   -16    
208    224    
-864   -400   
0      -256   
192    256    
192    1200   
112    1008   
-240   0      
0      -752   
-288   -560   
384    -128   
-480   160    
208    96     
-16    144    
16     0      
-288   -64    
96     64     
-176   -96    
48     128    
-80    16     
16     32     
320    320    
-576   240    
-32    272    
48     176    
128    -192   
32     48     
64     192    
-128   80     
-80    -176   
16     -48    
-64    -48    
144    -144   
-128   384    
-576   64     
0      -144   
-256   -240   
208    16     
-80    304    
-80    -32    
16     -208   
-96    0      
320    464    
-48    64     
128    96     
-96    96     
0      64     
-96    -624   
32     0      
48     16     
-144   0      
144    224    
80     80     
-160   160    
272    64     
-208   -64    
64     -272   
-80    128    
176    48     
-96    32     
-48    -160   
-48    64     
-224   -128   
32     272    
-224   -192   
480    -288   
-96    128    
144    48     
-64    80     
-16    80     
48     64     
-112   80     
80     112    
-160   96     
112    96     
-128   0      
-144   -16    
16     -48    
-32    64     
64     48     
64     128    
0      80     
32     32     
-16    32     
240    32     
128    400    
-240   64     
176    16     
-112   112    
192    32     
-224   32     
240    224    
-176   128    
0      32     
-64    128    
-208   32     
432    48     
-160   96     
48     -32    
128    144    
16     176    
16     160    
-208   -112   
208    -16    
0      80     
112    48     
64     144    
64     48     
32     112    
128    16     
32     16     
48     64     
96     128    
-96    -16    
192    80     
-64    -352   
-320   -64    
352    400    
-304   128    
-144   176    
-176   112    
144    144    
112    192    
128    144    
16     -64    
16     80     
160    -48    
240    -16    
160    16     
-96    64     
-32    0      
-32    48     
-16    320    
-192   256    
-48    128    
-176   -112   
224    -544   
160    112    
-64    128    
48     48     
-144   0      
256    192    
-48    32     
-224   -48    
336    -80    
0      -80    
96     -128   
-96    -64    
208    -64    
32     64     
-32    -16    
48     -32    
48     192    
-112   -816   
176    144    
144    112    
-96    0      
-32    112    
144    80     
48     96     
208    -32    
-272   48     
144    224    
-160   -32    
-48    -144   
144    80     
-16    -16    
-64    16     
64     -288   
64     32     
16     112    
64     64     
-16    48     
48     96     
-176   64     
-16    -32    
-96    -64    
112    112    
-48    -112   
192    -32    
32     -144   
-80    -352   
64     96     
-48    -128   
0      96     
-96    48     
128    144    
-96    48     
0      48     
48     -176   
0      -48    
-48    -48    
112    128    
304    336    
-272   -64    
32     32     
160    -112   
80     64     
48     -192   
64     144    
144    -304   
16     48     
0      -112   
80     128    
96     96     
16     208    
32     32     
80     112    
-32    0      
-80    -80    
80     192    
160    160    
-32    -16    
16     -176   
128    112    
-80    -64    
32     16     
32     96     
320    176    
-336   128    
112    96     
32     16     
16     96     
-32    -64    
160    -48    
64     -16    
80     -176   
16     144    
-16    -192   
16     240    
-64    -160   
-16    224    
64     -48    
-32    112    
-96    -64    
176    -16    
272    128    
-32    368    
-80    176    
-64    -96    
0      -32    
112    -448   
-80    -304   
32     -416   
128    -32    
80     -160   
144    80     
16     -432   
64     144    
48     -160   
80     64     
96     96     
-128   160    
-48    -112   
48     -672   
176    -80    
48     -32    
144    128    
112    80     
80     -32    
-96    -16    
96     272    
-48    -496   
80     -704   
-160   -336   
176    592    
-64    -352   
-96    -384   
288    -704   
-128   -176   
160    -1472  
-272   -96    
416    32     
-96    -80    
-32    -288   
64     -112   
32     -1008  
16     240    
48     -112   
-80    -64    
160    -160   
32     -432   
-1600  16     
208    -16    
-48    -16    
16     -48    
-64    -240   
-16    -1440  
304    -432   
96     144    
304    432    
96     288    
48     640    
176    -160   
-400   -544   
0      -112   
16     -80    
-160   224    
544    -16    
-496   -400   
128    -480   
336    320    
96     128    
128    112    
80     -1216  
128    -112   
192    -224   
-240   -208   
352    -224   
96     32     
-336   0      
480    -160   
-80    320    
448    432    
-64    -16    
272    -64    
144    16     
176    80     
176    32     
-160   -400   
144    -48    
-176   -272   
224    16     
96     48     
-192   -192   
-144   -128   
-16    112    
-288   -192   
-256   -224   
-1168  -48    
32     -16    
112    -16    
64     352    
144    848    
-16    80     
32     -480   
-176   -512   
128    -48    
192    48     
128    320    
-448   -80    
352    -400   
-64    -32    
48     256    
-32    -208   
-208   144    
-288   -16    
-32    -336   
-416   -608   
0      -640   
608    416    
-48    432    
192    160    
48     -688   
96     528    
-32    -160   
0      -496   
432    448    
-480   -320   
256    -256   
-80    -432   
-720   160    
-640   -1408  
288    240    
-112   336    
-32    -272   
320    16     
96     1152   
-80    -96    
160    -176   
128    128    
-368   -192   
-144   192    
176    -32    
-288   80     
112    -272   
-208   32     
64     -416   
288    512    
-32    48     
112    192    
-64    -528   
-48    -112   
96     -432   
-144   128    
-32    -400   
-144   -192   
0      288    
64     96     
-64    384    
16     -96    
-128   -208   
32     176    
96     96     
64     -192   
-48    16     
96     -192   
-160   -432   
-272   -656   
208    240    
-272   64     
80     -352   
64     128    
-64    80     
64     -64    
240    288    
-256   352    
-400   -80    
-32    48     
-208   -192   
-96    32     
-560   -64    
112    224    
-320   80     
-48    -16    
80     320    
112    176    
-16    256    
64     64     
-80    176    
160    -80    
-16    160    
-208   -80    
-112   112    
-32    -80    
-48    128    
48     48     
-128   -16    
48     80     
-224   -16    
-224   272    
240    -48    
240    176    
-1056  -16    
-208   -16    
272    -64    
16     96     
-112   -16    
64     96     
96     16     
-128   32     
80     144    
-352   -48    
-80    -16    
-160   80     
48     -32    
-256   -48    
0      80     
-768   -48    
-128   -16    
-16    -160   
176    -32    
-128   16     
224    112    
-160   -192   
96     32     
-160   64     
272    240    
-416   -32    
-16    128    
-304   -96    
144    -80    
208    -32    
-48    -112   
16     80     
-592   -16    
32     80     
-64    -48    
0      256    
0      112    
-112   -80    
32     32     
0      64     
128    112    
-96    -48    
32     48     
-48    80     
-64    32     
-112   96     
64     128    
-640   -144   
32     112    
32     -48    
16     -16    
-64    144    
48     -80    
160    32     
-32    112    
-48    96     
0      -16    
-96    96     
288    16     
-144   32     
0      -16    
16     128    
-160   96     
-224   224    
-32    -272   
-96    -224   
16     32     
144    32     
112    432    
80     224    
-304   -112   
80     64     
80     80     
-80    48     
-48    -96    
-224   -32    
0      0      
-272   0      
192    48     
-640   -144   
0      -112   
160    -80    
16     0      
208    208    
80     176    
32     -80    
128    48     
288    128    
-176   -48    
384    80     
-176   -96    
96     32     
-288   -160   
240    32     
48     -288   
-288   -384   
240    48     
-592   64     
-48    96     
-240   64     
-240   48     
-48    -48    
-128   112    
-208   -224   
128    224    
32     -80    
32     -64    
-336   -240   
192    176    
16     64     
-16    256    
128    96     
-192   -272   
-16    -192   
80     16     
-80    160    
144    16     
-400   -128   
112    -32    
-16    208    
-176   -16    
-80    128    
-224   112    
48     -32    
-80    -32    
-80    -256   
336    -16    
-64    96     
96     32     
-48    16     
192    48     
32     112    
32     32     
-32    96     
96     128    
-208   64     
144    176    
-16    -48    
0      16     
176    176    
-96    80     
48     80     
80     64     
-16    80     
-112   -48    
32     -32    
144    32     
112    144    
-176   64     
-32    96     
-96    32     
32     32     
176    96     
32     32     
-48    16     
-16    64     
208    192    
-48    48     
-128   144    
48     96     
48     80     
-32    112    
96     160    
64     176    
-16    80     
-32    0      
32     144    
128    48     
-144   -160   
144    -176   
-224   208    
368    192    
96     224    
-208   128    
176    80     
128    48     
32     32     
48     64     
48     64     
80     112    
144    80     
-368   -1168  
192    192    
48     -336   
80     -384   
-80    -512   
96     160    
96     -256   
-112   0      
64     -192   
96     192    
-176   -144   
240    -48    
-32    368    
64     -112   
-160   176    
304    -48    
-240   -224   
224    304    
-80    -32    
160    256    
-16    128    
-16    16     
-32    -288   
464    240    
-192   160    
144    48     
112    128    
32     64     
16     -80    
176    -112   
-16    16     
48     -96    
176    -896   
96     -288   
336    960    
144    1072   
16     -96    
0      -368   
48     112    
128    144    
-64    -96    
112    64     
-80    64     
224    224    
-80    32     
-32    -192   
96     0      
32     -1152  
48     80     
80     96     
16     96     
272    224    
-48    336    
96     176    
208    288    
-64    80     
48     272    
64     192    
-144   0      
96     576    
272    0      
-96    96     
608    16     
-944   -192   
-48    -1504  
-64    -464   
48     160    
0      48     
-112   -80    
-16    112    
256    288    
32     288    
-80    352    
336    80     
-16    16     
160    -128   
-192   64     
-32    64     
-192   -48    
368    -304   
-480   -144   
384    -736   
-112   272    
32     656    
256    592    
-96    112    
208    96     
-64    -80    
-16    -208   
-128   -128   
-320   -416   
96     -176   
-160   320    
-208   -64    
144    -240   
-304   -48    
112    -752   
-272   -400   
112    -336   
176    -288   
-176   192    
32     304    
-96    224    
240    -208   
-432   -336   
48     -432   
-32    64     
80     -272   
32     128    
-112   -208   
400    -144   
-176   224    
16     48     
-96    912    
64     -112   
0      32     
160    -224   
176    96     
-48    64     
336    -64    
128    288    
-256   -272   
48     176    
208    -480   
112    48     
160    240    
144    -672   
144    -352   
48     0      
128    -768   
16     320    
0      -496   
240    -512   
80     528    
-16    -976   
112    -64    
128    128    
-80    -160   
32     48     
288    -240   
192    -368   
128    160    
-128   -1328  
208    160    
-48    -32    
288    64     
-768   112    
80     -496   
96     -224   
-176   224    
192    -192   
-208   -752   
256    -304   
80     80     
272    -96    
-160   -32    
160    -96    
16     -592   
-304   -512   
224    -384   
-80    -336   
-560   -240   
-80    -176   
80     0      
32     -288   
288    -96    
48     -592   
-160   16     
-32    16     
128    192    
96     64     
-208   -48    
192    272    
-112   192    
-64    -144   
240    -128   
-224   -32    
128    -16    
-80    -112   
-80    -384   
112    -160   
-48    -656   
96     -304   
-192   -1200  
272    -32    
16     -32    
-16    -96    
-16    -272   
80     64     
-80    -64    
-96    -272   
-96    160    
-80    80     
32     -16    
112    -80    
-32    -176   
304    0      
-48    32     
224    -192   
-224   64     
32     -272   
128    -48    
96     -16    
-64    -16    
16     16     
-48    32     
-16    48     
112    -208   
-272   -256   
256    -304   
0      128    
-32    -16    
224    208    
176    -240   
-240   64     
240    -2608  
-64    112    
32     0      
128    -96    
-96    -128   
208    -16    
-320   -64    
-48    -64    
16     -16    
-64    0      
-608   -48    
96     -176   
0      -80    
32     -464   
16     -32    
64     -304   
-64    80     
16     224    
176    96     
-288   0      
96     -48    
-256   -16    
128    0      
-336   -80    
368    -128   
-320   96     
80     -16    
-16    48     
-80    -48    
-48    128    
80     -224   
-16    64     
-208   -16    
-32    256    
80     384    
-32    -144   
-192   -352   
96     -80    
-208   112    
-48    96     
0      -144   
224    64     
16     80     
16     -32    
-64    128    
208    -176   
0      -144   
-176   64     
224    -32    
-16    96     
160    -16    
-208   -96    
192    -144   
-208   -96    
192    -32    
-32    -32    
-176   -192   
336    208    
-1856  -208   
16     -48    
-1696  -464   
-160   -144   
-144   -304   
-48    -144   
48     80     
32     0      
208    336    
80     -112   
48     -16    
288    192    
0      -32    
-1360  -144   
32     112    
-704   -192   
-16    0      
256    112    
0      176    
-512   224    
-16    -144   
-304   -32    
-144   -80    
16     112    
80     112    
128    144    
-80    -80    
48     48     
48     -240   
208    16     
-144   0      
96     32     
-64    48     
-112   -80    
144    -64    
-64    16     
-208   16     
96     -384   
-304   240    
-400   -80    
-544   16     
-16    -48    
-80    0      
-32    -48    
176    256    
-272   -256   
64     80     
256    64     
-320   -64    
160    112    
64     96     
128    256    
-112   64     
-64    -112   
-400   -32    
-112   -32    
-128   -32    
240    48     
-112   48     
192    112    
-144   32     
0      16     
96     64     
-144   -176   
96     112    
32     160    
-192   112    
0      96     
0      0      
-64    16     
96     16     
-304   0      
144    -16    
32     -224   
-16    64     
16     208    
-128   32     
-48    48     
160    144    
-128   128    
-32    -160   
-144   -64    
80     -32    
16     144    
128    176    
-160   224    
-272   0      
-64    32     
-48    -96    
64     0      
48     48     
160    48     
-112   112    
96     80     
-208   32     
-48    -32    
-48    240    
32     -32    
-96    320    
-32    448    
-80    32     
-304   -32    
48     -144   
288    512    
-16    464    
-272   -400   
96     -208   
48     192    
96     464    
16     64     
-240   -64    
144    304    
-16    48     
48     -16    
-336   -160   
224    96     
-144   48     
0      32     
-400   -16    
-80    48     
16     96     
-64    16     
-48    -352   
64     -304   
80     752    
-288   -544   
256    448    
-64    96     
-64    48     
-64    16     
-128   16     
-304   -208   
304    -352   
16     256    
96     -64    
144    128    
-16    32     
240    208    
-112   432    
112    112    
-32    288    
32     48     
16     80     
16     144    
112    80     
48     240    
16     -176   
-32    -80    
80     48     
112    16     
16     160    
496    464    
-192   336    
-160   -176   
96     -96    
320    512    
-128   0      
-144   -144   
48     384    
16     64     
-128   -176   
-80    -32    
48     -16    
-64    240    
32     32     
16     48     
-16    80     
-48    16     
160    -32    
-144   64     
208    48     
144    160    
-256   -16    
-144   16     
-192   -416   
240    112    
16     464    
16     288    
144    304    
272    416    
-112   144    
128    96     
0      288    
192    32     
496    864    
240    1184   
-96    848    
128    -32    
304    208    
-192   -160   
16     112    
-160   -352   
-160   -96    
-16    -48    
-336   48     
64     416    
80     336    
-176   48     
48     -144   
-48    192    
-96    112    
304    512    
-288   400    
-224   144    
208    -592   
-272   -1728  
480    208    
48     1072   
-16    352    
-224   -48    
-32    -144   
288    -48    
80     304    
-192   64     
112    496    
288    704    
-432   704    
64     -272   
-144   -32    
-160   -16    
-32    -544   
816    720    
-528   384    
112    -336   
-112   -592   
416    256    
336    816    
-176   208    
80     -144   
96     224    
144    320    
192    -32    
-272   -160   
192    -16    
-112   -48    
-96    48     
160    384    
-64    112    
144    384    
288    208    
-224   80     
176    256    
-32    256    
-160   80     
-80    -320   
-176   -192   
208    48     
-224   -112   
80     112    
0      0      
32     -64    
240    416    
80     -704   
32     64     
176    128    
-112   144    
176    576    
80     208    
-80    -64    
160    64     
208    112    
-192   112    
-192   -48    
208    -80    
-112   -32    
336    -144   
128    272    
32     -544   
-128   64     
240    0      
-112   112    
0      304    
128    80     
-320   -288   
432    96     
-16    144    
64     32     
80     64     
112    48     
16     -48    
64     -80    
48     64     
-48    -176   
80     144    
-144   -144   
0      48     
48     -48    
32     112    
64     112    
96     112    
-48    -96    
0      64     
64     144    
64     -144   
32     176    
-32    -144   
-16    96     
272    -144   
16     64     
16     112    
-80    16     
144    -2640  
-80    112    
64     48     
-176   -112   
112    32     
-48    64     
16     64     
128    -368   
-16    0      
240    16     
208    192    
-128   -224   
80     176    
128    -144   
-16    80     
48     -272   
144    96     
-48    128    
80     48     
32     80     
-96    -112   
128    48     
16     -96    
-32    176    
240    -64    
48     160    
80     -32    
-160   112    
16     -32    
240    -32    
-112   -16    
64     48     
-48    48     
64     80     
-144   80     
96     -112   
0      -80    
0      -128   
48     -32    
-16    -144   
48     80     
-80    -96    
128    112    
64     -128   
96     -80    
16     -128   
64     -2032  
64     0      
48     -464   
16     -544   
-16    16     
64     -176   
-176   128    
320    -1168  
-48    -144   
192    96     
-64    -32    
112    0      
16     -144   
256    -96    
-208   48     
144    -288   
-208   -32    
240    -96    
-64    -288   
-160   0      
224    -368   
-32    -208   
112    -544   
288    176    
-112   -368   
144    144    
192    288    
-112   -96    
32     -96    
64     80     
64     -64    
48     80     
-112   -48    
112    -192   
-1088  -304   
416    -224   
-48    0      
272    48     
96     -64    
48     -352   
288    -80    
112    -2032  
80     -16    
32     -48    
-32    16     
96     -16    
160    96     
-336   0      
96     -16    
-400   64     
48     -16    
80     0      
32     -96    
160    64     
112    -240   
-208   -464   
224    -80    
32     288    
0      -192   
16     96     
128    0      
-112   -144   
16     48     
96     0      
-112   16     
-144   -320   
-688   -448   
128    -224   
-16    112    
-16    48     
208    128    
-80    -240   
16     144    
48     -1456  
112    0      
0      -80    
32     -16    
-112   -32    
112    -192   
-160   -16    
16     -160   
-272   -192   
0      -80    
-240   -96    
0      64     
160    208    
-128   -624   
-144   48     
288    -656   
-32    16     
-176   -208   
304    -16    
-288   -176   
208    32     
-160   -160   
-64    -240   
-32    -48    
64     80     
-208   -576   
0      -368   
336    144    
0      -16    
208    464    
-224   -48    
-112   96     
80     64     
112    -160   
-176   -16    
0      -16    
-192   80     
-16    -32    
80     240    
128    -80    
-208   -128   
256    -208   
128    96     
-144   0      
48     96     
128    -224   
-48    -336   
-208   -144   
0      -32    
48     -128   
272    208    
-96    -48    
192    -96    
-432   -448   
-32    -256   
-96    -240   
48     80     
32     496    
-192   -320   
48     -128   
-912   -208   
-512   160    
16     -304   
80     288    
-64    256    
144    -48    
-112   0      
160    272    
-160   -16    
32     384    
-128   32     
32     -224   
64     224    
-1296  -160   
64     -32    
16     96     
-464   -160   
336    -240   
-352   336    
64     -48    
-288   0      
-48    64     
-96    -240   
48     -176   
48     -16    
48     176    
-160   -96    
48     96     
-80    -144   
0      32     
0      64     
-96    64     
-16    64     
-112   -64    
-128   -32    
-448   -80    
-112   16     
-48    432    
-16    160    
-32    -144   
-64    176    
48     -272   
-176   160    
48     -160   
0      80     
96     176    
-112   0      
0      0      
-16    32     
-112   -16    
-96    16     
-208   16     
-208   -32    
-160   -224   
-112   -80    
224    96     
-208   32     
192    96     
-48    144    
-208   -16    
288    16     
-336   176    
112    80     
-144   -144   
208    0      
0      -16    
-48    128    
208    32     
-32    80     
240    -48    
-528   -1024  
192    -592   
-32    -32    
-128   -336   
-208   -208   
48     -48    
-96    176    
64     112    
-64    96     
-80    48     
-48    -80    
16     80     
-112   -112   
16     112    
-816   -48    
-128   112    
16     -80    
-32    112    
256    192    
-64    656    
304    416    
-272   112    
48     -208   
-64    -128   
-64    32     
-32    -128   
-96    96     
-112   -144   
112    -112   
-1184  -1232  
80     -496   
608    880    
-704   624    
192    -528   
-128   96     
16     208    
-160   -128   
176    272    
176    96     
-288   384    
-32    -80    
-32    -144   
-192   128    
-96    128    
-336   -352   
-48    128    
-416   576    
-160   96     
-144   -128   
96     208    
-96    272    
64     272    
-64    144    
208    112    
-48    112    
-128   16     
-48    -64    
-48    -96    
144    112    
-304   -320   
-112   176    
304    320    
-208   80     
0      -32    
-112   -32    
-32    -80    
208    -32    
-16    -112   
-160   -112   
304    -16    
-224   -16    
496    384    
-624   128    
160    -32    
-144   -16    
144    48     
32     -32    
-16    -128   
-208   240    
432    128    
-480   -112   
496    64     
-112   112    
-176   0      
-128   -176   
224    -224   
0      256    
48     -160   
32     144    
336    0      
-672   32     
80     64     
-128   48     
128    80     
-32    64     
32     48     
-48    64     
48     16     
-160   -240   
32     -32    
-16    -160   
16     96     
-64    80     
208    96     
-176   -32    
32     -128   
-48    96     
176    208    
-208   16     
144    96     
96     240    
160    0      
32     128    
-32    16     
64     0      
-144   -16    
320    -32    
-128   64     
176    144    
64     -144   
-32    48     
64     96     
-208   80     
96     80     
-16    160    
-32    48     
64     -16    
192    192    
-64    32     
-64    32     
-80    64     
0      48     
-64    64     
112    80     
-16    80     
32     64     
-80    64     
-16    48     
-144   128    
144    80     
-80    48     
16     80     
112    96     
-16    -32    
-64    48     
-48    48     
0      176    
-160   -48    
240    -272   
-32    144    
160    32     
-32    48     
80     32     
176    32     
256    336    
-272   64     
32     32     
144    64     
32     32     
0      64     
112    64     
-144   80     
0      48     
32     -656   
16     -192   
-48    -16    
240    80     
-96    176    
224    -64    
-240   160    
336    128    
-400   64     
192    48     
-32    0      
48     160    
128    -128   
-48    176    
112    64     
-32    -304   
256    96     
-160   -1888  
64     80     
0      -16    
-16    -144   
96     80     
48     192    
32     176    
32     -32    
16     96     
-112   -48    
-48    32     
80     112    
-160   80     
64     0      
176    128    
-112   -272   
16     32     
80     64     
256    32     
96     160    
-80    0      
32     80     
112    -32    
-96    0      
64     48     
-176   0      
80     32     
272    160    
-256   -64    
64     208    
64     -160   
128    80     
64     -1296  
320    240    
-224   16     
32     80     
-80    -80    
320    128    
-272   80     
160    64     
64     16     
0      -16    
64     112    
64     -32    
112    256    
-16    -112   
160    176    
-80    -592   
-48    128    
176    -1008  
-16    48     
96     48     
160    256    
-80    -80    
112    -48    
96     32     
240    -96    
-64    96     
224    -144   
64     128    
192    -112   
-16    128    
48     -224   
-32    -96    
64     -304   
64     32     
80     0      
208    112    
-96    64     
176    64     
32     96     
80     -160   
-96    0      
176    -192   
-48    112    
128    -64    
96     144    
192    -160   
96     864    
304    416    
144    208    
-80    272    
-144   0      
48     -848   
-16    -528   
480    224    
-96    -16    
256    352    
-32    48     
96     64     
48     -144   
0      16     
64     -336   
-48    -16    
272    96     
-112   80     
0      -144   
224    48     
112    560    
144    192    
-240   -480   
176    -128   
-160   -784   
192    -240   
0      -16    
48     -272   
112    16     
32     -176   
-112   -752   
80     -240   
368    -80    
-176   208    
32     -48    
320    64     
-304   128    
32     -400   
208    -672   
176    -1120  
192    16     
224    -528   
64     176    
48     -16    
96     16     
-32    -480   
-16    -48    
-32    144    
32     -160   
32     16     
0      -64    
-608   -256   
112    64     
0      0      
-32    -848   
48     384    
-16    -80    
80     -48    
-96    0      
80     -96    
48     -128   
-176   32     
80     -112   
64     64     
96     304    
-128   -48    
-960   -32    
32     560    
112    480    
-128   -704   
-80    -672   
176    48     
112    240    
64     -1136  
64     16     
-16    112    
112    48     
-128   -96    
256    -336   
-48    272    
240    240    
-128   16     
16     -112   
-112   0      
144    16     
288    256    
-128   -272   
-192   -704   
96     -624   
160    16     
-112   16     
64     -144   
-160   80     
224    -16    
-272   -112   
96     96     
-80    -16    
-64    -80    
-144   -64    
128    -32    
-80    -160   
48     -80    
32     -16    
80     -96    
-64    -32    
16     -368   
-48    -256   
-208   -384   
-16    -336   
80     -64    
64     96     
-96    -48    
112    16     
-32    64     
0      16     
-112   96     
-64    -64    
160    112    
-80    -208   
-16    -16    
32     -416   
16     64     
0      160    
80     32     
-112   -112   
80     16     
-496   -96    
-112   -272   
0      -512   
304    -64    
160    384    
144    208    
128    96     
-48    -208   
-16    -352   
-128   -608   
96     -672   
-480   -880   
416    -208   
-496   64     
288    256    
-96    368    
80     -16    
-64    80     
96     16     
-128   -16    
-16    -272   
80     -16    
176    -80    
64     848    
48     144    
-96    -272   
-80    -96    
64     128    
-128   -48    
672    784    
-640   -32    
64     -800   
64     560    
0      112    
-48    -336   
64     48     
-80    256    
-320   112    
-64    -160   
128    176    
-464   368    
-304   272    
-1264  -432   
128    -304   
-64    416    
32     224    
144    64     
-400   -176   
48     -272   
-80    80     
-48    48     
-144   48     
16     -80    
32     320    
-256   80     
192    0      
-272   -96    
0      -16    
96     144    
-1040  192    
-144   80     
256    176    
-320   32     
96     -128   
48     112    
16     -32    
-64    352    
-80    0      
-128   -32    
-112   -80    
-16    112    
-336   32     
-144   -192   
160    64     
0      160    
-96    96     
-656   112    
304    80     
-144   208    
112    176    
-432   -320   
224    -16    
-96    80     
-96    32     
0      48     
-80    16     
0      48     
-112   160    
48     -32    
-112   32     
32     48     
-608   -224   
-32    -160   
112    -80    
-96    128    
64     -16    
-112   32     
32     176    
-288   336    
480    -208   
-224   208    
0      -128   
-176   -16    
176    -144   
-32    16     
32     -16    
-144   16     
0      96     
-1536  -160   
240    -48    
128    48     
240    112    
-96    160    
160    0      
-96    96     
80     0      
-128   -80    
0      64     
-64    128    
-288   -16    
-48    -80    
96     96     
64     128    
-224   -48    
176    176    
-192   -32    
48     128    
-64    176    
-304   64     
-48    144    
240    64     
-144   32     
-48    -32    
-48    112    
-112   -16    
16     48     
-128   -16    
144    112    
-160   -144   
80     0      
0      -128   
-224   0      
16     32     
192    64     
-16    64     
48     64     
16     -64    
-256   -16    
128    160    
-336   -48    
192    176    
-32    -80    
-32    48     
-80    -32    
-16    80     
144    80     
-32    -32    
96     80     
32     160    
-32    144    
112    -16    
-48    16     
80     144    
128    64     
-144   160    
208    128    
-16    -48    
-48    -80    
-144   -32    
-80    -160   
400    -112   
-160   272    
208    64     
-112   64     
-32    -80    
112    64     
-16    32     
16     64     
48     192    
-144   0      
-80    0      
208    -48    
-112   128    
-144   -80    
-16    -64    
208    16     
-192   96     
0      64     
48     64     
16     32     
48     -16    
48     0      
-32    48     
-112   48     
-48    -32    
-16    -16    
-160   -160   
288    144    
-256   -48    
32     64     
80     64     
-16    64     
64     80     
48     80     
-16    80     
128    160    
-96    32     
16     64     
-32    32     
96     112    
-112   144    
48     144    
16     16     
208    -48    
-144   -64    
224    48     
-80    0      
80     128    
-80    48     
112    96     
-64    16     
-48    32     
16     96     
48     64     
160    80     
-64    208    
-144   80     
-96    128    
384    112    
240    288    
-240   176    
176    64     
-96    48     
192    112    
-112   224    
-160   32     
-16    -144   
-320   -224   
368    96     
-112   96     
-144   192    
-112   112    
96     128    
304    208    
-80    160    
0      400    
-208   80     
208    -32    
96     240    
80     -192   
-48    16     
224    80     
96     112    
0      144    
-256   96     
240    -32    
-16    0      
-16    16     
-144   48     
-256   -512   
-80    -192   
160    96     
-16    -32    
64     64     
16     16     
160    112    
0      96     
96     352    
288    288    
-16    384    
416    336    
-64    0      
176    -80    
-80    -480   
-80    -2192  
320    144    
-288   288    
336    48     
-128   -144   
288    0      
-80    80     
128    176    
-48    -176   
-112   -48    
80     -144   
32     -32    
256    -160   
-96    -608   
144    176    
-96    -656   
-32    48     
208    80     
-96    192    
64     -48    
96     -48    
-208   -288   
144    -128   
128    32     
112    464    
-288   64     
208    -208   
0      160    
16     80     
16     -32    
-272   -240   
208    -272   
-192   224    
16     640    
368    16     
-240   288    
80     -16    
256    240    
-48    256    
-208   -432   
-96    -160   
384    208    
64     352    
-512   -688   
-144   -512   
272    -576   
-144   64     
48     -672   
64     176    
16     112    
-16    128    
32     48     
192    48     
-272   32     
240    144    
-16    112    
16     0      
64     16     
-64    -240   
288    144    
-16    448    
208    128    
144    -400   
-16    848    
224    -992   
-176   -16    
208    -112   
-48    400    
-48    -112   
208    16     
-80    144    
0      96     
208    144    
-176   -400   
176    160    
16     0      
96     80     
-32    -16    
64     48     
48     -80    
128    240    
-128   -160   
192    32     
-32    336    
-32    -272   
80     -48    
-112   -704   
400    32     
-192   -48    
192    0      
-32    16     
112    64     
-64    -32    
96     80     
32     -80    
48     96     
16     16     
64     -96    
-112   -144   
416    144    
-352   -336   
304    -128   
-416   16     
192    -864   
64     -144   
-128   80     
144    -16    
-48    -256   
-48    80     
144    -304   
16     -736   
128    208    
64     -400   
64     -256   
384    240    
-208   512    
-16    -560   
272    -944   
-32    528    
80     -464   
-48    -96    
32     320    
256    0      
-176   -208   
208    336    
48     -400   
-16    144    
80     -64    
-32    288    
-1168  224    
-48    240    
176    32     
-320   -608   
208    384    
32     -320   
-144   -192   
144    80     
16     -64    
128    -16    
96     -32    
-48    -208   
64     256    
-64    -16    
-16    -480   
-320   448    
-112   400    
352    272    
-112   192    
112    160    
32     -224   
256    -272   
-176   -1616  
64     -336   
192    -176   
-128   48     
240    48     
-32    64     
176    160    
80     -80    
-80    -16    
96     -208   
-368   -576   
64     -240   
160    48     
32     96     
176    32     
48     -656   
-96    64     
0      64     
-80    0      
80     -144   
-48    -240   
64     32     
48     0      
-64    -128   
336    112    
-112   -16    
0      -64    
240    -272   
96     -288   
-80    -64    
0      -752   
448    320    
-416   -112   
240    0      
-144   -64    
240    -144   
-240   -32    
64     192    
48     -112   
-160   96     
64     -80    
112    160    
-2320  48     
128    0      
-416   16     
240    -240   
-80    256    
192    -624   
32     128    
80     -48    
320    128    
-96    -64    
80     -128   
16     32     
64     -208   
-240   80     
-16    -48    
0      16     
-80    64     
304    192    
-16    -288   
272    224    
-64    -304   
176    112    
-352   32     
80     48     
-432   0      
0      48     
16     128    
-160   -64    
368    144    
-96    64     
144    128    
160    -176   
112    48     
-32    -480   
-368   -160   
96     -528   
80     -48    
160    224    
144    192    
-160   64     
208    304    
96     64     
-80    48     
-128   -48    
368    240    
-592   0      
16     -128   
64     48     
-128   -320   
64     48     
-48    32     
-992   0      
-240   96     
-192   -32    
-64    -80    
144    16     
-48    112    
-80    -48    
-208   32     
96     16     
-80    48     
-560   -48    
80     48     
-48    -176   
192    144    
-144   160    
-224   128    
-48    0      
-224   16     
48     32     
-1008  -96    
-16    0      
128    -160   
-224   -32    
80     -144   
-80    96     
128    -64    
144    176    
-432   -176   
224    80     
-336   16     
-16    64     
0      80     
128    48     
-64    96     
-144   64     
-176   -16    
-912   0      
-112   -96    
-112   -48    
-64    176    
96     -48    
-96    64     
32     -144   
-192   -80    
0      64     
32     0      
480    384    
-608   240    
-16    32     
-176   -48    
96     128    
-176   128    
-224   -80    
144    -128   
16     176    
48     -208   
-32    64     
160    16     
-96    64     
-16    80     
-64    48     
-192   -16    
80     64     
-160   112    
-144   -16    
128    128    
32     -16    
-160   112    
-448   -96    
0      96     
16     -16    
64     96     
96     144    
-48    64     
64     96     
64     144    
-16    96     
-32    -16    
-16    -16    
192    128    
16     112    
-416   64     
-32    64     
-320   -304   
64     -64    
96     0      
-128   32     
-96    -32    
128    -160   
16     -256   
32     -144   
16     -224   
-112   -112   
224    0      
-256   48     
208    208    
-384   144    
80     224    
-64    128    
80     96     
-144   -48    
208    192    
-224   80     
-64    -64    
-240   32     
384    160    
-176   16     
-112   -528   
32     -304   
-160   64     
208    224    
-128   96     
32     48     
-272   -112   
384    240    
-160   432    
-304   -112   
144    576    
48     -96    
-16    -224   
-32    416    
48     336    
-48    -112   
80     -176   
176    256    
-224   208    
-272   -576   
64     0      
-64    224    
32     96     
-48    32     
224    464    
-64    -80    
-208   -32    
208    32     
80     208    
-48    -400   
-96    -80    
32     176    
-96    64     
240    320    
-304   -32    
224    16     
-352   -160   
16     -160   
-32    64     
-48    64     
64     240    
-16    32     
192    160    
32     192    
-16    -224   
-32    160    
-32    48     
272    272    
0      544    
-384   -160   
96     -144   
-192   -112   
304    80     
-272   48     
288    -544   
192    -32    
448    112    
-192   176    
96     -144   
976    800    
-32    1056   
160    544    
96     -304   
-48    144    
-320   224    
128    -176   
-416   -304   
-80    -784   
240    224    
-96    240    
96     -128   
144    -288   
256    176    
-96    80     
128    -144   
16     -128   
-96    208    
-48    -512   
320    -240   
-32    224    
576    208    
-400   208    
224    -256   
80     144    
-208   176    
48     -592   
-80    -96    
400    48     
32     624    
208    256    
208    -288   
240    448    
-192   -48    
144    64     
-128   -32    
96     -1952  
-16    64     
16     64     
112    80     
0      64     
48     80     
48     32     
0      -32    
-32    -112   
288    448    
-128   512    
-32    320    
80     -16    
80     496    
-160   48     
-32    -528   
144    -80    
64     -64    
32     432    
96     16     
48     32     
464    448    
-480   352    
64     -112   
192    160    
-208   160    
112    -16    
-96    16     
-144   -192   
448    640    
-256   528    
176    -416   
-48    -128   
-48    -432   
400    176    
-256   464    
144    112    
96     656    
-96    -16    
-32    -32    
96     160    
-48    48     
-16    16     
112    80     
96     80     
16     -128   
64     112    
368    96     
-384   -144   
-32    -96    
16     -304   
64     16     
512    1136   
-96    544    
80     208    
-16    48     
80     -16    
-112   -400   
-80    -368   
208    256    
96     -96    
0      16     
176    32     
-224   -496   
32     -48    
192    48     
0      96     
144    96     
128    112    
112    192    
-80    -96    
-48    -48    
96     -16    
-32    -160   
16     80     
16     -128   
112    16     
0      -160   
48     -16    
-64    -720   
0      -208   
48     -352   
-256   272    
144    80     
-256   96     
16     32     
256    208    
-160   128    
80     -16    
-48    224    
192    -128   
160    96     
-96    -304   
0      224    
48     -432   
16     -96    
96     -16    
-96    112    
-112   64     
0      96     
-16    -80    
64     48     
-32    416    
144    288    
-112   96     
64     -256   
16     112    
48     -224   
448    400    
-448   272    
48     32     
-240   -80    
272    -16    
48     -48    
-80    80     
64     48     
-32    -176   
-16    112    
48     -352   
-160   -32    
224    -96    
-64    48     
80     -192   
-32    64     
112    16     
80     32     
-32    -64    
224    144    
32     80     
0      128    
64     64     
208    32     
-256   160    
112    -224   
128    64     
64     -32    
80     96     
96     -32    
32     -32    
48     -384   
80     144    
80     -144   
-288   208    
288    32     
-160   -208   
288    -1264  
16     32     
128    -816   
-16    256    
16     -432   
192    -112   
320    128    
96     -112   
-128   16     
48     -64    
48     64     
32     16     
112    -32    
80     -192   
-176   -656   
224    -464   
-400   -144   
128    -288   
-192   224    
-128   -224   
240    -160   
48     -2608  
112    -80    
48     64     
144    -64    
-96    -336   
368    176    
368    -160   
16     128    
-240   144    
176    48     
-352   0      
-64    -80    
64     -112   
256    -16    
64     -128   
-256   -768   
256    16     
-112   256    
-80    -48    
-64    -160   
-16    160    
48     -96    
112    160    
48     80     
-144   16     
80     -16    
80     -112   
64     16     
-16    -256   
128    -16    
-96    -256   
-96    96     
80     -352   
-144   -128   
16     -32    
160    48     
64     32     
144    -48    
-160   -16    
48     -176   
-656   -272   
64     0      
-1280  64     
32     32     
-160   -96    
16     -112   
-96    16     
-64    -608   
48     64     
112    -48    
112    112    
0      -32    
80     32     
-64    -64    
0      0      
-96    -16    
-128   -16    
16     112    
-80    32     
112    -16    
64     16     
80     -16    
96     -288   
-144   -32    
320    -144   
-112   208    
0      48     
-128   -160   
32     -16    
112    -32    
-80    112    
112    96     
-480   -16    
32     -96    
80     80     
-96    -112   
176    -48    
-96    -64    
208    48     
-176   -528   
0      512    
-64    240    
-160   -96    
64     48     
128    -80    
-240   -128   
512    192    
-496   352    
-96    -16    
-64    128    
144    -80    
-96    320    
0      -96    
-48    224    
80     -912   
-80    -160   
32     176    
64     0      
-48    -112   
288    144    
-256   240    
160    64     
-176   -272   
16     112    
-832   -240   
112    128    
-32    304    
128    -208   
64     80     
0      -240   
176    -448   
80     -144   
-32    -416   
-192   -32    
16     -336   
-96    -112   
32     64     
0      256    
128    144    
-208   -64    
-176   -192   
48     -128   
-736   208    
-160   -144   
128    32     
-592   32     
-240   -16    
192    -16    
-112   0      
-32    -32    
-16    80     
0      48     
-144   80     
128    -544   
-288   512    
-80    0      
0      16     
-352   -80    
128    256    
16     464    
48     16     
-32    128    
-288   528    
-160   -128   
-80    -416   
96     240    
-80    368    
-208   320    
-64    320    
112    -48    
-368   -432   
80     -304   
-176   -256   
32     336    
-256   224    
112    -96    
-240   224    
-128   -224   
240    -336   
-64    144    
16     -48    
-1072  -64    
416    192    
208    576    
-96    304    
272    -208   
80     80     
-80    -128   
48     -64    
208    -80    
288    48     
-48    -64    
-112   -48    
160    -48    
-192   -64    
48     -176   
144    -288   
112    176    
-288   128    
32     -240   
-176   -304   
176    -80    
48     336    
-160   384    
208    0      
128    48     
-144   48     
-80    -80    
-176   -112   
-16    -80    
-48    32     
-192   96     
-384   608    
-704   -1056  
-128   -112   
192    544    
-96    240    
112    256    
0      96     
16     -64    
480    448    
-448   -320   
-144   -480   
208    192    
144    64     
96     144    
-208   -96    
144    304    
-48    304    
-160   144    
32     -384   
0      128    
48     576    
-176   48     
-32    -176   
0      -144   
-304   -64    
224    -480   
0      352    
-128   -288   
-48    -64    
-208   16     
144    192    
-480   128    
144    -48    
-352   144    
-256   -448   
-208   -80    
240    -192   
-176   176    
80     -16    
-160   -176   
64     96     
64     240    
-96    -80    
16     -112   
-208   176    
224    -320   
-112   -32    
288    528    
-256   -80    
48     112    
-96    112    
-80    -208   
176    272    
16     176    
-176   -336   
-16    -272   
-272   -112   
144    272    
128    496    
-112   -272   
-352   -496   
-48    -224   
0      176    
144    272    
16     304    
128    -368   
48     -16    
16     432    
96     -48    
-80    -144   
16     -224   
-16    320    
160    160    
32     224    
96     192    
-16    112    
-112   64     
-32    -128   
0      -48    
-80    192    
-32    0      
-80    -128   
32     -32    
96     32     
-192   16     
272    240    
-80    128    
-128   -16    
288    224    
0      64     
144    160    
-160   96     
176    48     
0      64     
0      0      
32     64     
48     0      
64     96     
256    192    
-128   80     
0      80     
48     112    
-224   -208   
64     -64    
96     0      
80     16     
112    112    
-64    -112   
16     -32    
224    0      
-48    80     
80     96     
32     48     
32     112    
16     80     
-32    80     
-64    16     
-64    96     
448    320    
-416   80     
96     144    
64     80     
32     96     
96     144    
-96    80     
160    144    
-256   64     
336    144    
-96    16     
80     16     
16     64     
128    112    
16     48     
16     144    
48     -32    
16     -480   
96     464    
144    160    
-32    112    
-96    -112   
-48    144    
368    32     
-160   -16    
256    0      
-176   96     
400    112    
-16    160    
16     -48    
-16    272    
-128   -80    
-48    -144   
240    64     
144    176    
256    80     
-224   96     
320    32     
-160   -128   
176    -32    
-48    0      
-80    0      
128    144    
-224   160    
-64    96     
-32    -48    
176    -80    
64     -96    
0      48     
336    320    
-368   224    
-176   -32    
-16    -48    
240    128    
-176   0      
-32    0      
208    208    
48     64     
48     16     
96     64     
-128   -400   
-16    128    
-64    -208   
-240   -128   
96     -1088  
-64    -48    
-48    80     
80     32     
16     64     
96     16     
-32    304    
128    240    
-32    80     
32     0      
96     64     
48     -80    
-272   -336   
256    -464   
-64    64     
464    -880   
-128   192    
80     -272   
48     112    
-32    -416   
-16    240    
96     -224   
-128   48     
432    32     
-128   80     
400    80     
-208   -96    
208    80     
112    -48    
128    80     
80     -208   
112    -16    
16     -1200  
80     128    
-224   240    
256    208    
-176   64     
208    64     
160    144    
48     96     
64     64     
-128   -224   
208    64     
80     32     
-32    112    
32     -480   
-128   96     
160    -64    
-32    144    
128    224    
80     80     
96     160    
176    112    
272    288    
-160   -288   
112    64     
64     -160   
128    128    
128    -432   
-64    64     
-144   -400   
-32    -16    
112    -112   
0      -80    
32     -304   
256    160    
-48    160    
-80    0      
-16    -112   
192    48     
64     112    
32     -304   
-80    160    
144    -176   
32     16     
160    -80    
-64    -192   
0      16     
160    512    
16     -368   
-96    -16    
-64    16     
128    64     
128    -1104  
64     -112   
16     -1968  
48     160    
32     160    
128    -16    
-32    96     
128    96     
48     0      
80     -192   
128    -464   
64     64     
64     -176   
32     96     
64     -32    
16     -544   
-64    -112   
192    -1120  
112    -576   
64     -528   
96     448    
-32    -64    
-80    -592   
192    544    
-112   64     
192    -848   
-160   368    
208    32     
-224   304    
160    -176   
-80    -16    
-1344  192    
0      -256   
0      -112   
80     -48    
192    -80    
-80    -496   
128    -208   
16     144    
144    -32    
-32    -96    
160    288    
144    -256   
48     144    
160    -48    
-32    -80    
64     272    
-80    -80    
144    32     
64     -144   
-16    48     
176    -912   
-16    -208   
208    -816   
208    64     
112    0      
64     64     
-16    -80    
224    -160   
-208   16     
256    80     
-592   0      
80     -224   
-96    -64    
144    -192   
-16    0      
144    64     
-32    32     
144    -448   
32     160    
-16    -128   
-256   -400   
32     -224   
192    -80    
-128   0      
112    -64    
-448   16     
224    160    
-816   -16    
528    592    
-144   272    
96     112    
464    64     
-128   -16    
32     -48    
-32    -256   
400    304    
64     256    
-160   192    
448    192    
-432   -128   
-288   -592   
-80    -288   
-192   80     
320    -64    
-608   64     
432    272    
0      464    
32     144    
272    64     
160    -640   
64     -16    
-336   -336   
-272   -960   
-128   -544   
16     -64    
-176   -48    
-144   -80    
-288   -48    
128    160    
192    80     
-16    -160   
-64    176    
-112   -144   
-48    0      
-48    352    
-176   -400   
-336   -528   
-16    688    
-320   -448   
-144   -480   
32     -736   
-80    0      
48     368    
-96    -128   
368    176    
48     240    
-160   224    
192    -256   
96     160    
64     656    
-32    -448   
-32    192    
80     -128   
128    256    
64     -496   
0      160    
448    560    
-512   464    
576    -1056  
-32    656    
112    768    
-64    416    
-752   -528   
80     -240   
-384   144    
-160   240    
-112   -256   
16     -608   
64     -96    
112    544    
-48    528    
-32    128    
-128   -208   
16     -96    
80     32     
-1120  -352   
80     112    
-272   -64    
160    112    
-176   160    
80     112    
-160   128    
-112   80     
32     96     
-784   64     
288    288    
-64    128    
192    272    
-448   48     
-48    160    
16     128    
176    128    
-144   -80    
-16    16     
-224   0      
-208   -96    
-272   -48    
-80    -16    
32     32     
-96    160    
144    256    
-2080  -16    
-128   -16    
-688   -176   
48     16     
-80    -160   
32     -16    
-48    -48    
112    64     
-80    -32    
-16    -80    
-272   16     
48     80     
0      48     
-208   -32    
48     -16    
-384   -48    
-32    224    
0      16     
-32    16     
256    32     
-192   -112   
160    -176   
-96    16     
80     0      
96     -16    
-64    32     
-32    96     
80     0      
-288   96     
0      -64    
96     64     
-128   -96    
-368   -288   
-32    144    
352    128    
-304   96     
-32    -96    
336    32     
128    352    
-272   -16    
48     48     
112    64     
-128   32     
48     64     
128    80     
-48    -64    
0      96     
-608   -96    
-48    112    
64     32     
-80    32     
128    80     
32     80     
32     80     
-176   32     
-48    0      
-128   -16    
144    96     
-128   32     
80     80     
-304   -128   
-32    112    
-272   -112   
128    256    
32     -48    
-48    -128   
-16    112    
176    128    
-352   64     
144    48     
-96    96     
-80    -16    
96     -64    
-256   272    
208    224    
-80    112    
0      -32    
-304   -96    
240    -48    
-64    16     
32     -80    
-32    -64    
-80    -32    
-16    96     
32     64     
0      128    
32     496    
-208   96     
-48    48     
0      16     
-32    -16    
64     80     
-192   -64    
304    96     
-128   112    
-96    192    
48     -96    
48     -80    
96     64     
-16    -32    
0      0      
80     48     
-48    48     
208    96     
-80    80     
0      0      
96     240    
-176   -144   
64     96     
64     32     
-32    80     
128    48     
-96    -176   
160    192    
128    112    
-112   192    
80     -208   
224    80     
-80    112    
128    0      
-160   -48    
128    96     
-128   -160   
0      112    
128    48     
-112   32     
448    608    
32     160    
112    32     
-32    64     
0      -64    
240    384    
128    96     
-192   16     
176    128    
96     208    
32     0      
32     -32    
80     176    
48     0      
-144   48     
160    128    
-32    224    
-224   32     
112    160    
192    240    
-320   -32    
128    80     
0      0      
96     32     
-32    112    
48     80     
-16    112    
64     48     
128    208    
-64    -32    
-256   112    
160    96     
48     128    
32     128    
-96    64     
-64    208    
112    32     
-64    -96    
96     48     
64     96     
208    -800   
144    256    
-176   192    
-128   0      
192    144    
-96    192    
64     32     
-144   16     
48     112    
-128   48     
-80    -144   
16     80     
-112   464    
112    112    
-368   -416   
208    -736   
-176   -16    
-16    64     
96     16     
-240   128    
48     80     
-80    96     
96     160    
-16    32     
32     224    
-48    -16    
-32    32     
-96    0      
-48    96     
112    64     
96     -32    
144    448    
272    128    
-96    -256   
64     48     
-112   -336   
-80    336    
144    -272   
176    48     
-32    624    
240    -288   
-64    384    
48     -128   
128    -208   
96     528    
16     112    
48     432    
-48    -1360  
400    -96    
-144   -272   
208    208    
0      224    
272    -64    
-112   160    
80     80     
64     0      
144    160    
-160   -48    
32     48     
176    112    
-64    -128   
96     32     
16     -704   
16     48     
-16    176    
32     -224   
64     0      
-32    400    
-176   -688   
64     -16    
-80    -112   
272    224    
-80    384    
144    -144   
64     416    
-32    -352   
64     -192   
-128   -256   
-112   -64    
208    -896   
-32    128    
192    -16    
16     64     
80     96     
32     112    
80     112    
80     96     
-16    -16    
80     -64    
128    560    
112    -16    
-32    -16    
80     32     
64     32     
32     -624   
128    144    
32     -304   
32     -288   
64     -288   
304    -160   
-32    48     
48     160    
112    80     
-80    -64    
48     224    
160    -416   
-112   64     
-80    -480   
0      -16    
-32    -672   
80     96     
-96    16     
208    32     
-64    96     
192    128    
-16    32     
-160   -480   
400    176    
64     128    
-80    224    
80     -112   
112    288    
32     -128   
160    256    
-80    -16    
32     -32    
-96    240    
320    -96    
-432   -288   
208    32     
-96    -32    
-96    176    
16     -48    
64     -160   
160    112    
-128   112    
288    80     
0      336    
48     304    
32     -272   
96     -48    
-128   -64    
672    288    
-464   96     
-96    -192   
112    -640   
80     -272   
-48    -496   
64     0      
32     -2608  
32     -96    
160    528    
-128   -208   
-16    96     
160    -112   
208    -224   
-80    128    
32     16     
256    -32    
160    -160   
128    32     
128    64     
112    -80    
-160   -160   
304    96     
0      96     
160    32     
-64    224    
0      -16    
-64    -336   
0      48     
96     144    
48     -96    
-32    -224   
-64    -80    
176    -128   
-1088  -496   
96     -128   
112    32     
32     -16    
16     48     
352    32     
-336   128    
144    -336   
-208   352    
32     -32    
16     -176   
128    -240   
-96    -64    
-352   -144   
-16    -80    
-160   16     
64     -48    
-16    -112   
80     0      
64     224    
-32    -64    
160    512    
0      208    
-176   -32    
112    -80    
-16    48     
-16    16     
0      -16    
0      -16    
-160   -160   
112    176    
-32    -32    
-896   -144   
-96    -64    
224    -48    
0      -32    
-32    32     
16     -416   
112    -16    
144    -96    
96     64     
48     32     
-48    16     
-32    32     
112    32     
16     16     
224    -112   
-240   -128   
112    0      
48     112    
80     -96    
32     -80    
160    -464   
96     16     
96     -416   
160    128    
80     80     
-64    -80    
32     32     
160    -176   
-96    128    
128    -192   
-256   16     
128    32     
-176   -48    
-32    -224   
96     80     
128    -224   
-16    -96    
64     -352   
96     16     
-32    -64    
-48    128    
-32    48     
96     32     
-160   64     
64     32     
-176   80     
208    -96    
-144   -48    
128    -16    
112    96     
-64    -64    
144    96     
336    -320   
-304   48     
-224   -176   
144    48     
160    64     
-240   0      
112    48     
-80    -64    
16     16     
-96    -224   
64     0      
0      32     
144    0      
224    -64    
80     144    
-112   -464   
-64    16     
112    -16    
80     112    
-176   -48    
64     16     
-112   -48    
64     -96    
-96    0      
48     -96    
-48    16     
-128   0      
0      96     
-1312  -256   
-32    96     
0      -16    
64     128    
-96    -32    
-224   80     
224    144    
-1040  128    
80     96     
-32    64     
32     -48    
192    -80    
-96    80     
-208   -80    
160    240    
-240   -112   
-128   64     
480    96     
-336   144    
64     16     
-160   48     
-96    16     
-144   160    
32     176    
-32    32     
128    224    
80     32     
-96    48     
128    -112   
48     112    
64     48     
0      -64    
-16    0      
-240   -272   
-80    -112   
-48    16     
-32    -16    
-80    240    
-176   16     
-320   -96    
-176   0      
-224   -224   
288    304    
-304   128    
64     112    
-96    80     
-32    -112   
32     80     
-48    0      
-192   -64    
80     80     
-96    96     
0      16     
-176   -16    
-208   0      
-64    32     
64     -112   
176    128    
-48    144    
16     32     
-144   16     
0      -96    
32     128    
-80    -64    
-16    96     
-144   16     
-80    -208   
112    -528   
32     -80    
-224   64     
0      64     
-960   -112   
304    -96    
112    -112   
48     96     
96     160    
-80    -80    
192    0      
-208   32     
192    16     
-192   -16    
32     16     
-192   -48    
240    -112   
-240   48     
112    80     
-576   -48    
304    304    
-256   -16    
96     32     
-112   112    
32     96     
240    64     
96     144    
48     32     
16     240    
-64    48     
128    -48    
112    -32    
-32    -80    
-16    -16    
-208   -80    
176    160    
-256   112    
80     144    
-160   224    
-96    0      
48     -96    
16     -64    
128    80     
16     128    
16     96     
96     144    
208    112    
-208   48     
-64    144    
-128   -16    
-272   -544   
-112   -32    
-144   96     
-16    480    
-80    640    
-112   208    
-144   0      
96     608    
-160   128    
-64    -176   
-320   -48    
128    48     
-176   64     
144    224    
-288   192    
-32    -112   
-144   -480   
192    80     
-128   112    
272    512    
-144   -224   
192    416    
-48    128    
-64    -400   
64     208    
-96    336    
32     -144   
32     80     
48     304    
-176   -160   
-96    -128   
32     -32    
0      80     
32     16     
-112   -224   
112    -288   
-176   -304   
112    -64    
80     -384   
-64    48     
112    -32    
-80    80     
-256   32     
384    144    
-208   112    
0      0      
48     80     
96     80     
0      112    
-96    64     
160    48     
-80    16     
48     64     
-32    48     
-144   80     
240    -160   
-208   -16    
112    -400   
-112   -16    
64     160    
-16    304    
144    -48    
32     0      
-80    160    
176    -96    
-128   144    
16     16     
32     80     
-112   -176   
48     -80    
-64    -160   
-16    -144   
112    0      
-128   -112   
128    176    
-48    48     
-16    96     
96     -64    
-128   80     
240    -48    
64     112    
144    32     
-48    144    
-48    -96    
272    -48    
-128   128    
208    224    
32     624    
32     16     
112    256    
-160   368    
-64    48     
80     48     
48     80     
32     80     
64     -96    
-240   32     
336    208    
-160   480    
-112   112    
160    -160   
64     160    
144    48     
-112   -1488  
160    48     
-16    80     
64     -624   
64     48     
192    592    
0      208    
-32    -96    
48     160    
-48    128    
0      -176   
112    224    
32     32     
-192   -208   
224    976    
64     -144   
-64    688    
-16    -576   
304    208    
-144   64     
48     48     
-32    400    
128    -352   
48     336    
64     368    
-96    -240   
96     176    
0      -144   
48     -80    
64     -160   
32     -272   
160    304    
128    -672   
-128   -224   
192    96     
-32    160    
80     240    
48     80     
-80    -176   
160    -224   
48     -176   
16     32     
32     80     
-32    -32    
480    512    
-176   576    
128    352    
-16    -496   
0      -64    
-48    -656   
64     -112   
176    -176   
-80    -144   
-32    192    
32     160    
-80    32     
128    80     
64     160    
-32    -64    
80     -96    
192    0      
0      112    
96     -48    
448    16     
-656   -288   
144    -160   
-48    80     
-16    176    
192    32     
-416   128    
464    112    
-512   128    
304    48     
-128   -64    
224    16     
0      -240   
192    112    
-80    -320   
144    112    
64     -192   
-48    176    
96     -1584  
-128   16     
112    32     
160    128    
-208   160    
0      -112   
-32    112    
272    -16    
-80    48     
160    -256   
64     48     
192    -112   
416    272    
-400   -144   
192    80     
-48    16     
96     176    
-144   64     
112    208    
-32    32     
128    -160   
-128   96     
0      -64    
80     80     
80     32     
112    112    
-64    -160   
144    16     
224    32     
32     96     
144    32     
192    -128   
-96    -48    
160    -352   
192    -1248  
16     -96    
144    -528   
176    -32    
96     224    
-16    -112   
-16    -80    
176    -208   
-16    160    
112    -112   
16     -160   
64     32     
112    -288   
-16    -32    
80     -912   
-16    -272   
256    -64    
16     144    
176    -80    
-96    -336   
128    -128   
48     32     
80     48     
32     48     
-64    -256   
224    -608   
-48    16     
640    304    
-672   160    
80     -48    
0      -16    
128    32     
48     -96    
-96    16     
-64    -272   
224    16     
64     -80    
16     -160   
0      256    
144    -16    
0      -16    
-176   16     
144    48     
-144   -96    
-32    -176   
96     -80    
-1296  -144   
16     -192   
32     32     
-32    -160   
-48    64     
112    -896   
-32    -112   
-64    -1760  
128    16     
112    32     
-48    80     
112    -16    
272    80     
-304   16     
64     -64    
-448   -96    
0      0      
-80    16     
-176   -64    
96     -112   
-32    -224   
16     16     
-48    -416   
144    112    
112    -32    
-16    96     
352    96     
-272   -16    
-96    -48    
96     112    
304    272    
-256   -192   
-272   -48    
368    -128   
-304   -32    
208    -96    
336    160    
-240   -16    
112    64     
96     240    
0      96     
64     -48    
-32    64     
-16    -48    
-32    -80    
128    -64    
-160   -16    
-336   -64    
48     0      
-544   96     
-64    -144   
48     -32    
160    -208   
-96    48     
144    0      
64     144    
96     0      
-96    -48    
-96    -128   
96     208    
-144   -96    
-32    0      
0      -16    
0      272    
32     64     
-96    -208   
208    0      
-112   -464   
-16    -112   
224    48     
-112   80     
-288   -160   
272    -80    
336    720    
-240   816    
-432   32     
224    -32    
-256   -176   
336    -96    
-416   32     
288    -304   
-464   -448   
240    -288   
-16    112    
-16    -208   
304    144    
-448   80     
16     80     
-64    -128   
144    48     
-48    -144   
-32    -32    
112    0      
-16    -96    
-48    -48    
48     -192   
64     0      
-640   -176   
-16    -32    
-320   -192   
176    -64    
-112   -304   
-752   -272   
240    48     
-208   -160   
64     -336   
112    -208   
176    -112   
-224   -128   
64     -416   
-352   -512   
192    272    
-16    -96    
-80    -80    
16     48     
-240   160    
96     304    
-144   320    
-32    -128   
-192   -272   
64     -128   
176    -80    
80     272    
0      -48    
32     48     
-432   -544   
-32    224    
-288   -368   
-400   -80    
128    192    
-64    -112   
64     464    
-240   -112   
80     224    
-240   368    
-96    -144   
0      -128   
-96    144    
-160   -240   
16     80     
-48    -176   
-48    128    
-16    -64    
16     64     
0      160    
0      224    
-144   0      
16     -16    
144    256    
-112   48     
-64    -304   
0      320    
32     32     
-128   -192   
64     192    
112    -64    
32     320    
48     224    
-48    384    
128    -96    
-160   80     
112    272    
-64    80     
-48    128    
-64    -80    
80     144    
-176   -144   
-144   -96    
144    176    
0      -368   
48     -288   
64     0      
-32    160    
-48    -48    
336    96     
-400   64     
208    32     
-80    80     
80     32     
-416   -64    
-48    32     
-112   -16    
-48    16     
-160   -32    
-32    32     
160    -208   
-224   -320   
-48    64     
352    208    
-64    160    
176    32     
32     -16    
-64    -16    
176    80     
48     160    
64     96     
208    304    
-160   336    
-256   -224   
96     592    
-32    -208   
-224   -80    
112    144    
-144   -144   
64     208    
-16    224    
-80    176    
16     0      
-80    384    
96     96     
-32    -64    
-64    192    
-64    -80    
-224   80     
96     256    
-176   656    
96     -64    
-464   -256   
176    -304   
-32    496    
0      272    
-240   -1056  
96     -240   
0      384    
-64    192    
-16    144    
-96    -32    
48     48     
176    96     
-96    48     
32     224    
112    288    
-16    -128   
112    256    
-128   -96    
-96    -64    
144    256    
16     144    
192    96     
-272   176    
192    -288   
-144   -96    
0      224    
128    -208   
-96    -48    
176    32     
-144   -144   
192    -336   
64     -336   
-64    -352   
-112   -336   
144    -16    
0      96     
-48    256    
-160   32     
0      160    
96     48     
-80    96     
80     -96    
-432   176    
160    16     
-144   -32    
192    48     
0      144    
-96    112    
-80    -96    
32     -32    
496    544    
-656   272    
96     -288   
32     32     
-32    176    
176    304    
-208   -16    
288    160    
48     208    
0      64     
208    16     
-368   -736   
-128   -400   
176    80     
96     -16    
0      -48    
304    144    
32     144    
112    128    
-112   -64    
128    -176   
-112   -48    
16     48     
32     48     
-176   0      
128    112    
-80    64     
176    64     
112    64     
-48    224    
-160   -224   
416    -256   
48     -128   
-32    -80    
-48    -32    
-176   -720   
-48    -80    
256    208    
80     224    
-304   -48    
-240   32     
368    48     
-64    48     
-112   16     
64     -64    
48     -144   
176    32     
-112   -16    
112    160    
-80    48     
192    -544   
96     160    
96     96     
-272   112    
208    96     
32     32     
288    160    
-320   160    
-80    128    
-48    -16    
160    80     
-80    96     
32     -16    
224    128    
48     160    
16     -80    
128    160    
176    64     
64     -48    
-64    48     
-64    32     
-240   -32    
160    0      
-32    0      
96     96     
-64    -80    
-16    80     
-96    32     
-144   -112   
-64    -16    
112    -400   
192    64     
-16    -512   
176    80     
-48    48     
96     64     
-64    -80    
-80    48     
224    128    
-256   -256   
32     112    
128    80     
-240   -48    
144    -256   
16     80     
160    -80    
0      -32    
112    -320   
-96    32     
-192   48     
480    144    
-272   -16    
176    48     
-112   128    
192    48     
-64    -16    
32     144    
192    -48    
-160   -64    
96     96     
192    -96    
144    64     
-112   -16    
64     48     
-32    -448   
-64    -96    
96     -32    
176    96     
-112   0      
144    80     
32     48     
32     112    
32     112    
48     -16    
-64    96     
272    -112   
-80    320    
80     -384   
-112   160    
-80    -752   
288    80     
-16    -2368  
32     64     
-96    -16    
64     64     
32     96     
128    288    
64     32     
-32    0      
208    192    
-96    -416   
-80    0      
96     -128   
64     272    
32     -112   
32     48     
-48    16     
240    224    
-16    224    
-64    160    
112    96     
80     -32    
80     32     
-16    -80    
256    160    
-80    32     
-96    80     
272    0      
-32    48     
288    -64    
-144   96     
80     -544   
64     112    
-16    -32    
288    128    
-128   -272   
-96    -208   
304    224    
80     48     
32     48     
336    80     
-336   128    
-352   -272   
640    112    
-352   -208   
-32    -432   
144    -272   
-48    -592   
288    96     
80     -720   
48     -1120  
176    -48    
32     -128   
192    32     
-16    128    
64     80     
16     208    
-32    128    
-48    48     
112    192    
-80    -48    
-128   -32    
128    -224   
-48    80     
-224   -176   
208    -320   
96     -32    
128    -256   
240    176    
128    -304   
0      -400   
128    -1872  
48     -256   
272    176    
-48    48     
80     96     
0      80     
-32    -96    
16     -32    
96     80     
48     80     
-1680  -48    
32     -224   
192    48     
48     112    
96     -640   
-160   -544   
304    304    
-160   -1088  
112    -624   
80     80     
0      144    
208    -144   
-144   -64    
80     96     
-160   -480   
-112   -128   
240    464    
-48    -160   
-16    304    
48     -208   
96     -80    
-256   -112   
-64    -384   
128    -48    
-112   -16    
416    128    
-48    160    
0      -416   
288    -432   
32     0      
-176   192    
256    -368   
-224   160    
160    448    
-48    80     
-48    -560   
-16    -240   
352    32     
-208   784    
-160   -288   
288    -400   
-64    224    
-16    -160   
112    -192   
64     224    
-64    48     
-48    -240   
-464   -128   
-64    -560   
-976   352    
592    192    
-224   288    
48     -320   
256    272    
-144   -2048  
336    16     
-416   -32    
160    0      
0      64     
-48    -32    
16     -64    
-48    -160   
-288   160    
32     480    
-64    336    
-96    -176   
-192   -352   
144    -336   
144    -48    
-64    -1120  
176    -64    
-32    48     
-128   -32    
96     -192   
-80    -80    
-48    192    
208    480    
32     560    
48     -32    
-112   -32    
256    -224   
-240   112    
64     -480   
-64    -336   
128    -176   
64     0      
16     208    
-432   -576   
-128   -608   
112    16     
-176   -112   
80     48     
-80    -32    
160    64     
-1680  -48    
128    -208   
80     64     
160    -96    
48     112    
0      48     
-48    -32    
-96    32     
-112   -16    
192    208    
48     160    
32     592    
-64    -48    
-304   -400   
480    752    
-464   416    
16     -928   
192    128    
-656   272    
176    -80    
-32    352    
-880   -32    
80     -144   
-448   -320   
112    400    
-48    -176   
224    176    
-128   144    
-64    -48    
-128   -112   
-48    208    
256    240    
-160   -80    
160    -96    
-80    208    
-32    -48    
16     128    
-144   176    
-368   -80    
64     -608   
-16    64     
16     160    
-48    48     
-240   -464   
-16    -160   
128    96     
-128   -192   
48     176    
-96    -288   
-96    128    
128    48     
16     96     
-144   416    
144    272    
-224   64     
-80    -16    
-144   -96    
320    -128   
48     -32    
128    144    
-48    224    
-240   80     
192    -16    
80     176    
0      32     
-144   32     
-80    -160   
-48    -16    
-112   -16    
-80    112    
128    176    
-304   144    
48     -32    
-96    0      
80     -64    
32     64     
-112   -16    
64     -48    
0      32     
-48    -80    
32     96     
-240   -32    
32     176    
64     -16    
-192   128    
144    -16    
-256   16     
-224   -176   
96     0      
192    -32    
-64    80     
352    256    
-528   64     
336    -96    
-320   80     
128    64     
-80    32     
80     144    
-48    112    
160    368    
-432   -112   
-144   -80    
-16    -336   
-288   -144   
272    192    
-224   96     
-80    -96    
-96    112    
112    32     
-240   0      
176    208    
-256   80     
-112   64     
-288   -48    
112    96     
32     80     
64     96     
240    32     
-224   32     
-96    -48    
192    240    
-16    320    
-80    256    
-128   -32    
80     16     
-16    32     
-272   -128   
-96    -32    
-128   -16    
-144   48     
0      128    
16     80     
-256   -128   
-32    48     
-352   -80    
48     160    
-16    96     
-16    80     
144    208    
-32    112    
-240   80     
320    272    
-48    272    
-240   64     
96     192    
240    144    
0      144    
-80    -128   
48     144    
224    16     
112    112    
272    144    
-176   64     
80     64     
0      -32    
0      16     
96     32     
64     160    
464    384    
-368   160    
80     -112   
-64    144    
-192   64     
-80    80     
80     0      
96     80     
-224   16     
144    128    
144    112    
-80    96     
80     32     
16     144    
192    112    
144    32     
-128   48     
-48    16     
32     48     
-80    -64    
80     176    
160    32     
-64    112    
32     144    
48     32     
16     112    
-16    80     
48     64     
16     -48    
0      16     
96     16     
-176   64     
176    96     
64     160    
-64    32     
-48    112    
208    80     
-16    64     
48     128    
208    208    
-208   80     
80     96     
-64    -112   
64     -96    
-48    96     
-32    16     
112    16     
-16    -32    
32     0      
-16    -64    
-144   -224   
304    48     
96     176    
32     160    
-112   80     
256    160    
-112   144    
16     -32    
-80    32     
176    192    
-16    80     
0      16     
-80    80     
112    176    
-128   -96    
160    -1712  
16     144    
0      256    
-160   -336   
224    -96    
-16    -160   
-32    224    
16     32     
64     512    
-192   -176   
-176   -800   
208    -96    
112    -288   
-48    -32    
176    -160   
112    16     
48     -176   
-32    -80    
96     -224   
-144   -80    
272    112    
-144   0      
96     -32    
0      -96    
64     240    
-80    -32    
384    240    
-224   464    
144    144    
32     -160   
16     -736   
160    176    
-112   464    
-32    128    
112    -352   
0      16     
48     48     
304    624    
-256   272    
256    -208   
-32    560    
-48    -672   
64     -240   
352    448    
48     224    
192    960    
-160   -272   
112    -800   
64     -32    
160    64     
48     80     
352    448    
-320   80     
192    -368   
0      512    
-16    496    
160    -704   
0      128    
112    48     
-144   16     
240    -16    
144    144    
112    608    
-32    -240   
-16    128    
-256   16     
-112   -96    
-16    320    
-48    -400   
32     208    
80     0      
-48    16     
144    0      
128    16     
352    272    
-256   96     
64     192    
192    -272   
16     352    
192    -992   
-336   -96    
304    -608   
160    80     
176    -160   
-208   -32    
224    240    
-144   416    
16     224    
0      160    
272    -48    
-64    16     
-160   16     
64     -240   
-112   -32    
80     -16    
-144   320    
-80    0      
-64    -144   
-240   -400   
208    176    
240    352    
-48    512    
48     112    
-320   -480   
80     -304   
64     560    
368    336    
-336   -496   
192    208    
-80    288    
32     64     
16     288    
240    496    
-240   16     
272    -64    
-288   112    
224    -32    
-64    32     
96     -336   
368    -80    
-16    -240   
208    96     
128    -160   
128    48     
-224   0      
80     -496   
336    224    
16     480    
48     -80    
240    -384   
64     -192   
-48    -96    
384    -1040  
-48    240    
208    -144   
-144   -48    
176    112    
16     -192   
48     80     
192    64     
-64    -544   
128    -256   
176    176    
-352   -384   
-32    -1760  
256    -880   
416    1040   
-240   -592   
256    336    
64     -16    
-176   -656   
144    400    
80     -816   
272    448    
-288   480    
48     -576   
0      -96    
16     64     
112    -112   
-432   144    
80     -16    
-512   -128   
112    288    
0      -288   
320    -608   
-160   -336   
112    -288   
16     160    
-144   -144   
192    224    
64     32     
-272   -16    
80     -80    
-16    64     
-176   -16    
16     -16    
-704   0      
80     -112   
16     -48    
192    -400   
-304   -256   
208    -64    
96     64     
16     -400   
240    464    
496    544    
-384   464    
-16    208    
288    288    
-224   384    
-64    128    
-16    336    
416    352    
-944   144    
320    304    
-176   48     
-16    -320   
128    -32    
0      -832   
80     48     
304    160    
-176   80     
48     112    
48     -240   
-240   -192   
64     -48    
-96    -112   
64     32     
-592   48     
16     -16    
-48    -64    
208    176    
-240   -80    
176    -16    
-96    80     
-64    48     
240    64     
80     224    
-64    192    
-48    48     
192    16     
16     80     
176    -16    
-544   -16    
-160   -272   
-176   -16    
144    -16    
-240   80     
128    -64    
48     48     
112    -576   
-192   208    
400    144    
-96    -208   
448    -112   
-192   16     
-32    64     
-16    -16    
0      192    
80     32     
-144   192    
64     112    
-16    64     
128    -224   
0      16     
96     -400   
48     64     
-48    16     
-48    0      
-32    96     
-32    -48    
-240   80     
256    64     
-320   0      
272    144    
-144   -64    
-16    -176   
240    112    
16     -304   
240    288    
-416   -112   
64     16     
96     192    
-160   64     
-208   -96    
0      -48    
-16    0      
-16    -96    
48     -32    
144    -128   
-576   -272   
272    -160   
-128   320    
-688   176    
384    416    
320    448    
-1040  64     
-64    224    
16     16     
-48    -80    
-16    -256   
352    -192   
192    112    
128    272    
-752   -192   
368    16     
-64    48     
16     80     
-64    0      
16     -32    
-80    -320   
-480   -320   
-96    128    
-64    112    
-176   256    
-112   160    
32     32     
128    -32    
-192   -48    
-240   -96    
128    128    
32     -32    
16     64     
-304   -304   
80     64     
-144   -48    
-64    0      
-16    48     
48     48     
0      0      
-176   32     
128    16     
-224   80     
16     224    
-208   0      
-64    48     
32     -32    
-32    64     
48     128    
-192   -96    
128    160    
176    0      
96     96     
-128   32     
-208   48     
-128   16     
-48    48     
-528   64     
320    224    
-208   144    
-16    96     
-80    -160   
32     224    
240    64     
-64    64     
-16    48     
-160   0      
-48    -80    
-64    -64    
96     160    
128    80     
-16    128    
-624   16     
16     208    
-960   -256   
16     80     
32     -80    
-16    80     
64     16     
-112   -16    
-16    0      
96     -16    
16     48     
0      112    
-64    0      
16     48     
-48    -32    
-176   -32    
128    112    
-288   32     
96     192    
-16    -160   
-96    -48    
64     32     
-32    48     
48     160    
32     -16    
-64    144    
144    192    
-96    128    
-128   160    
160    64     
-288   -80    
160    80     
-288   0      
128    -160   
16     32     
-16    -144   
-32    320    
112    32     
-160   48     
240    128    
-32    -112   
-160   -288   
32     -224   
-112   -224   
32     -48    
112    304    
-192   -48    
-304   -256   
336    -32    
16     224    
80     80     
-64    -16    
160    176    
32     64     
-16    -128   
176    224    
-32    -80    
-32    -16    
112    336    
-112   160    
48     16     
32     240    
-176   -528   
-240   240    
64     -736   
48     -176   
-32    -544   
96     384    
-32    800    
-208   -224   
-48    -32    
64     32     
-144   64     
-64    -48    
16     16     
-160   80     
176    160    
-256   -16    
0      16     
-16    -320   
-96    -144   
48     112    
-128   80     
64     -16    
-48    128    
32     48     
-128   80     
128    80     
-432   -544   
208    -80    
-48    112    
0      80     
128    192    
-128   160    
128    48     
-16    64     
-64    288    
96     -256   
-192   0      
464    176    
-128   96     
-16    -64    
-16    16     
-48    64     
816    592    
-448   672    
80     320    
-80    208    
0      416    
624    400    
-144   448    
80     144    
96     48     
-96    224    
96     -48    
-144   256    
160    -96    
-64    144    
128    128    
-48    144    
112    128    
96     320    
272    192    
-256   -32    
160    16     
-224   192    
224    -16    
32     -112   
-336   -400   
-48    -464   
-48    -128   
-192   -144   
-48    -240   
16     48     
64     96     
-288   -464   
80     -2240  
144    160    
64     480    
-192   496    
208    144    
-96    64     
-336   -96    
272    96     
-128   -32    
-112   16     
-272   -128   
160    176    
32     80     
96     64     
-112   -224   
96     -528   
144    288    
32     -32    
96     224    
-128   -96    
320    624    
-112   352    
208    -144   
-64    -368   
-80    144    
-16    128    
-16    -272   
48     -48    
176    544    
16     96     
224    -16    
112    112    
720    592    
-352   1328   
304    -912   
176    64     
-16    448    
160    64     
-144   -48    
-112   -80    
-80    -320   
224    128    
-176   -592   
160    288    
192    272    
64     -224   
64     -288   
-80    -1760  
208    544    
-240   368    
16     -160   
-128   -336   
96     -128   
-128   -80    
176    0      
-128   16     
128    -192   
80     144    
352    32     
-368   -272   
192    -288   
336    368    
-432   -352   
176    -528   
304    160    
192    288    
-32    384    
80     64     
16     -224   
272    -192   
0      208    
144    16     
-16    -48    
336    64     
-288   -112   
272    -32    
-32    -48    
128    -48    
-16    -48    
-48    -3792  
272    -48    
-160   -384   
352    128    
-192   112    
80     112    
-16    32     
192    128    
-64    96     
32     128    
240    304    
-96    0      
96     224    
-64    80     
80     48     
144    48     
64     160    
32     -96    
-32    -32    
224    160    
-160   128    
192    144    
-96    96     
-32    80     
176    192    
32     112    
32     -256   
-32    112    
224    -160   
-192   192    
96     32     
16     128    
-80    -16    
240    224    
-32    -32    
-32    96     
64     0      
32     -96    
144    112    
64     -448   
32     256    
-48    -192   
-224   48     
192    -128   
144    80     
-64    -128   
96     96     
-128   -400   
48     96     
96     96     
-272   -240   
192    -240   
112    -128   
-16    -640   
32     -144   
64     96     
96     -128   
0      96     
160    -144   
112    176    
-144   -448   
160    240    
112    192    
-192   -368   
128    16     
80     -336   
64     -240   
224    -48    
-80    -592   
-32    64     
176    -624   
0      -160   
144    0      
-80    -128   
192    96     
128    -32    
304    240    
-80    208    
16     -160   
32     -96    
-80    0      
-208   -352   
-192   -48    
-112   -96    
192    -32    
-48    -272   
32     -160   
336    16     
-176   -320   
96     192    
96     128    
64     96     
-320   -48    
-16    -176   
80     96     
-32    -16    
96     -32    
-576   -128   
304    -144   
96     -64    
160    -192   
-32    -16    
272    -224   
-112   112    
48     -80    
-192   -112   
112    -304   
-64    16     
112    96     
368    176    
-384   -48    
112    128    
-64    640    
-48    80     
80     -128   
48     0      
288    48     
-176   -192   
128    48     
176    -240   
-32    32     
96     -96    
-80    96     
368    64     
-32    -48    
-96    -80    
224    -32    
-32    48     
-96    -272   
-736   96     
256    64     
-128   -32    
208    -160   
0      -128   
16     -432   
16     48     
-16    -176   
48     96     
-80    64     
-32    32     
80     -48    
-48    -240   
-80    96     
-48    32     
-160   -32    
144    32     
-144   -112   
0      -272   
16     -16    
16     -128   
80     144    
16     -640   
272    240    
160    96     
-192   -64    
80     48     
80     32     
-368   -96    
288    -96    
-368   64     
-32    -160   
-576   48     
160    -176   
64     80     
192    -160   
-112   160    
48     -992   
96     -48    
-224   -32    
80     -80    
48     144    
160    80     
-240   -96    
96     16     
-224   -32    
0      -64    
0      192    
208    -80    
-192   80     
112    -224   
-16    96     
96     -656   
240    176    
-368   -16    
32     -256   
96     16     
160    0      
-160   -160   
32     64     
-48    -32    
192    16     
-240   0      
64     16     
-32    80     
48     -112   
-32    80     
16     128    
144    224    
-80    272    
224    784    
128    -96    
-272   -624   
192    1104   
-112   -272   
224    -208   
16     432    
-160   -80    
-976   -208   
32     64     
-256   -64    
0      80     
-48    112    
-48    -64    
-112   0      
-544   -48    
-368   -272   
64     -1008  
176    160    
48     -272   
160    512    
48     -144   
0      256    
-32    -160   
80     -48    
-64    -64    
64     192    
-176   16     
80     -256   
-208   80     
128    64     
-32    -272   
-80    736    
32     -144   
-128   -160   
-32    192    
-48    -16    
-96    144    
64     -112   
-48    16     
64     16     
-224   352    
0      -320   
-160   -224   
48     64     
16     48     
-16    160    
-272   -16    
112    304    
-1568  -240   
80     -96    
-160   -336   
-16    -288   
0      -416   
0      256    
112    48     
-96    192    
128    16     
-96    48     
32     0      
-48    320    
-48    -96    
-288   -80    
-48    48     
-608   -16    
-32    48     
-144   -16    
64     112    
-160   -144   
-16    448    
384    32     
-224   -96    
16     -160   
-240   -80    
64     128    
-112   112    
-96    -80    
160    256    
16     416    
-208   256    
608    320    
-1040  48     
80     -48    
-48    -240   
-80    -96    
-32    -16    
-272   -16    
176    48     
-160   128    
0      144    
-240   32     
-48    -32    
-128   -304   
-256   -144   
96     -464   
-32    16     
-336   256    
432    128    
144    272    
176    576    
-32    240    
-160   -144   
32     -208   
16     16     
48     -64    
-128   112    
128    -32    
-272   -192   
-480   -304   
224    176    
-32    224    
-656   -288   
64     96     
80     96     
-80    -160   
-96    112    
272    -112   
32     624    
-160   160    
-16    128    
144    -544   
-80    144    
-224   -208   
80     96     
-96    -80    
64     384    
-128   -160   
-176   -272   
144    32     
-208   -288   
224    144    
256    944    
-64    16     
16     -368   
-96    16     
0      224    
64     -16    
-48    480    
368    32     
-304   -464   
32     -592   
-256   -448   
-48    -160   
-256   -240   
208    16     
112    80     
-240   208    
-128   80     
0      -16    
0      224    
16     576    
64     400    
-144   112    
64     32     
16     256    
-160   240    
-80    160    
320    80     
48     128    
-16    -80    
-64    -128   
176    -272   
-48    64     
288    96     
-144   96     
96     48     
160    -80    
-160   -208   
400    0      
112    288    
-208   208    
32     112    
-48    0      
144    -16    
-144   -16    
96     272    
-160   192    
-160   16     
144    176    
-64    0      
-80    96     
304    48     
-256   -16    
160    208    
-16    80     
-16    64     
240    144    
-192   80     
32     208    
-208   96     
112    80     
128    80     
-16    112    
80     16     
-112   0      
112    32     
48     96     
-128   0      
48     112    
160    240    
-288   64     
16     48     
176    128    
-32    16     
144    64     
32     112    
-16    224    
112    0      
-160   -32    
304    320    
-192   0      
112    112    
64     192    
160    96     
-128   32     
128    208    
-32    96     
16     64     
176    64     
-112   16     
112    128    
-64    80     
96     32     
-64    32     
64     48     
-96    16     
128    192    
32     112    
-48    96     
192    192    
16     -448   
-48    32     
160    64     
16     48     
0      80     
-112   -32    
176    32     
64     -32    
-48    48     
96     112    
-96    -80    
96     144    
-48    -16    
112    128    
-128   96     
48     -240   
-112   -64    
176    112    
64     32     
-208   -16    
160    -64    
-16    112    
-16    144    
16     32     
-160   128    
-32    80     
48     176    
-32    0      
208    -192   
48     32     
48     -48    
-48    176    
0      -144   
112    80     
-64    64     
144    64     
16     176    
80     64     
-48    80     
112    240    
16     112    
48     48     
48     64     
160    -16    
80     80     
-64    -224   
32     80     
112    -352   
-96    96     
-96    -1184  
16     0      
160    80     
-64    0      
128    64     
64     192    
-128   -64    
64     -32    
128    80     
160    -272   
96     96     
112    -96    
16     16     
176    -224   
-64    -80    
144    -1136  
96     96     
-16    144    
48     48     
208    288    
-192   96     
64     64     
-64    16     
64     48     
80     96     
-112   64     
16     -80    
272    144    
-176   -400   
208    32     
208    -112   
-32    80     
64     48     
48     128    
112    336    
96     80     
-128   -16    
304    -160   
-160   -144   
144    -192   
0      160    
80     -432   
-16    -32    
160    -176   
80     112    
-80    -96    
96     96     
304    64     
80     112    
-144   -32    
48     48     
48     80     
16     -80    
-80    -112   
192    -48    
0      160    
-16    -96    
224    32     
192    160    
-240   0      
-16    -144   
304    144    
144    112    
16     416    
176    32     
-16    -528   
112    -432   
-208   160    
0      -640   
96     -112   
-144   -144   
352    160    
192    64     
32     0      
-224   48     
288    -176   
32     -1312  
-112   -64    
48     32     
-16    0      
-192   16     
0      -32    
240    32     
48     -128   
-48    160    
-96    -416   
0      -544   
32     288    
48     -192   
-64    -16    
64     -96    
64     -400   
80     16     
32     -400   
160    -32    
-512   -224   
48     16     
-1520  -144   
32     -144   
48     -432   
-64    -624   
96     480    
-112   -992   
128    -208   
-128   -560   
192    464    
112    80     
48     -80    
144    80     
-16    -304   
-48    -48    
0      16     
16     80     
48     -64    
80     -96    
-192   -448   
416    0      
-256   -528   
256    480    
96     752    
-192   80     
-96    -368   
416    224    
-160   -16    
-16    -80    
-16    16     
32     32     
-160   -48    
64     16     
-128   -160   
32     -48    
48     16     
48     -16    
-320   -96    
192    -432   
32     96     
-112   -32    
-96    288    
16     -48    
16     48     
-96    -80    
32     -224   
-208   -96    
32     -208   
-224   112    
144    96     
64     -64    
112    240    
112    288    
144    -576   
112    -112   
144    -128   
128    96     
-48    -16    
160    -128   
-176   -48    
176    -16    
-128   -64    
-64    -192   
-272   -96    
144    32     
-960   32     
96     -80    
336    352    
-256   -336   
-128   -272   
-176   -1216  
416    -560   
-272   96     
192    -576   
-400   -496   
48     -80    
-112   112    
0      0      
-336   -16    
48     -144   
-656   -480   
-48    -560   
112    160    
32     -560   
16     160    
80     -400   
128    16     
-192   0      
32     48     
80     368    
-176   0      
-208   -320   
-16    64     
-128   0      
160    128    
-240   160    
192    -80    
0      -80    
-32    -336   
32     -32    
16     -576   
112    512    
144    656    
-192   -224   
-48    -160   
368    160    
-96    672    
-48    208    
112    -400   
784    208    
-160   416    
-416   -96    
288    -144   
-192   -336   
208    128    
-32    80     
-64    48     
-464   336    
-160   -608   
-128   -48    
-80    208    
336    464    
-176   608    
-208   -272   
16     -208   
-208   192    
-576   -416   
0      112    
208    416    
-208   496    
-112   368    
-32    -144   
-80    -144   
-208   -192   
-32    -128   
-256   176    
-80    48     
160    -192   
-112   -16    
176    352    
-272   80     
-64    16     
48     160    
48     32     
-112   -16    
80     -112   
0      -192   
16     144    
-128   112    
-112   80     
-128   128    
-64    -144   
-208   -144   
64     112    
-224   -240   
176    -96    
32     32     
128    32     
0      -32    
0      48     
48     208    
-80    144    
-128   -64    
32     16     
16     96     
-384   -32    
-240   64     
-448   -176   
-80    -80    
-144   -288   
256    -288   
0      48     
256    -32    
-304   -48    
288    144    
128    144    
-224   160    
64     0      
-96    -16    
64     -48    
-128   32     
32     48     
-128   96     
16     -48    
-624   0      
128    160    
-288   -144   
0      96     
80     96     
-176   -160   
208    272    
32     -32    
-48    -16    
-16    32     
64     80     
-128   -48    
272    208    
-304   -112   
-16    112    
-592   -64    
160    16     
-16    -80    
-64    48     
128    96     
-272   32     
16     64     
80     80     
-224   0      
0      48     
48     112    
-80    16     
80     96     
-320   -96    
0      64     
-272   -64    
160    96     
-112   -32    
80     16     
32     -16    
-96    -96    
176    128    
-64    112    
64     -32    
112    64     
80     128    
-48    48     
-16    16     
-416   -192   
496    48     
-464   48     
336    16     
-80    16     
112    32     
-16    64     
-144   0      
272    160    
112    80     
96     144    
-48    0      
-32    80     
64     -176   
-96    144    
128    96     
-144   96     
16     -16    
80     -16    
0      192    
32     -16    
288    432    
-288   176    
16     176    
-48    16     
-64    64     
-208   -32    
0      48     
-240   -192   
192    48     
64     64     
-160   -16    
-176   32     
-96    64     
-48    128    
96     0      
-64    64     
48     32     
32     160    
-176   -352   
160    0      
464    432    
-512   16     
32     128    
272    144    
-224   16     
176    64     
-64    144    
-80    -16    
112    16     
272    64     
-176   -16    
-144   -32    
208    -32    
-240   80     
400    160    
-144   176    
-48    48     
-96    16     
144    192    
-112   -64    
-16    32     
-144   112    
224    16     
32     128    
112    64     
-256   96     
144    -32    
-32    -16    
96     96     
144    272    
-400   176    
112    0      
-240   -32    
208    128    
-48    32     
-96    48     
224    96     
0      16     
144    64     
64     80     
192    16     
-80    208    
160    80     
-112   128    
128    80     
-272   -64    
240    160    
48     32     
32     16     
48     48     
80     -96    
32     32     
16     80     
48     64     
96     48     
96     160    
-16    64     
112    160    
-128   -32    
80     64     
-416   -736   
96     -384   
320    -64    
-112   224    
-48    -48    
-240   -1040  
336    -32    
32     160    
80     144    
-192   0      
128    80     
16     -16    
48     336    
-192   160    
-144   160    
272    96     
272    96     
-336   -192   
96     160    
192    352    
-96    -160   
-80    -128   
176    48     
64     112    
48     96     
-208   -96    
144    -32    
112    -32    
224    288    
-128   240    
384    272    
304    224    
-144   32     
112    -16    
112    48     
144    -96    
-48    144    
-64    -1088  
128    -48    
144    -208   
-112   -208   
368    -176   
320    784    
-224   144    
-64    64     
160    128    
192    96     
-160   -64    
32     64     
144    160    
-144   -304   
112    160    
-64    -688   
80     -256   
272    176    
-192   96     
-32    -160   
336    32     
208    928    
-400   96     
336    -48    
96     112    
-16    0      
160    0      
-32    176    
176    -368   
0      128    
-112   -688   
128    -16    
-112   208    
48     -224   
-16    -240   
160    272    
-96    448    
128    144    
160    624    
176    544    
-176   -80    
272    256    
0      128    
-96    32     
160    96     
-16    16     
96     112    
-16    32     
144    160    
-48    -96    
272    112    
-64    272    
64     688    
112    352    
-48    -80    
-96    16     
80     352    
144    80     
-48    -128   
32     32     
96     -272   
144    96     
-80    -128   
160    80     
-32    48     
32     80     
-16    32     
-96    16     
160    -96    
-16    -48    
48     -112   
240    -208   
64     64     
192    -240   
-112   224    
32     -16    
48     144    
-160   -208   
64     -320   
16     -16    
192    160    
-160   -128   
64     -32    
240    -160   
-112   96     
144    224    
192    -32    
-64    96     
64     -112   
-48    112    
80     -32    
-32    -96    
48     80     
16     -1200  
32     80     
64     -336   
-48    128    
80     -16    
-160   -496   
96     -560   
0      -720   
432    624    
128    -1536  
-224   -352   
32     -224   
96     -96    
-16    176    
-48    -240   
32     -304   
64     64     
-208   -672   
-64    -208   
-48    48     
-128   -288   
160    -208   
-96    -144   
224    64     
80     -176   
-32    -32    
96     -1168  
16     -432   
192    208    
-256   688    
288    -832   
-16    288    
-80    288    
192    -576   
-112   112    
-144   -384   
-336   -960   
368    -544   
-32    496    
240    272    
48     -112   
48     -32    
-224   -288   
224    -64    
-64    80     
-32    -64    
-64    -304   
96     -576   
144    128    
-160   -592   
-32    -496   
32     -208   
128    -112   
0      176    
96     144    
-64    192    
160    -192   
0      208    
656    -800   
-464   608    
-48    -96    
-112   -304   
-160   -240   
32     -112   
-304   -32    
176    -32    
-464   32     
816    96     
-2160  -112   
240    -80    
-256   16     
128    -80    
-96    -80    
48     -368   
96     112    
-128   -32    
416    560    
-640   -64    
192    48     
-48    48     
48     -96    
-112   -48    
64     -64    
48     48     
368    208    
-592   -112   
384    32     
-400   128    
144    -432   
-48    -32    
256    -240   
176    192    
-224   -48    
64     64     
224    -48    
-384   -96    
-336   -160   
-64    144    
288    -80    
-176   -48    
-592   -112   
-64    -240   
-16    80     
-144   -304   
224    -176   
80     96     
-16    -64    
-80    128    
-176   -160   
-336   16     
224    32     
-16    -16    
256    112    
-320   112    
-80    -80    
-320   -96    
240    -16    
96     80     
-48    -32    
144    96     
-272   -16    
32     -32    
-16    32     
80     16     
-80    16     
160    -64    
-80    -96    
240    -32    
-16    48     
272    0      
-512   0      
224    48     
-176   96     
-720   -48    
240    80     
-240   64     
144    -80    
32     32     
-80    -112   
-48    96     
160    0      
-256   -48    
160    -80    
-192   -32    
96     96     
16     64     
-400   -176   
-32    64     
0      -224   
-224   -80    
-96    32     
16     80     
0      64     
-912   0      
-176   -80    
-352   48     
-16    192    
208    0      
-144   32     
-80    0      
144    64     
-240   -96    
144    80     
-176   -112   
-80    80     
-160   -160   
160    -16    
-144   -16    
-96    48     
96     -32    
-496   -64    
224    400    
480    304    
-560   48     
144    -64    
64     32     
-240   -160   
48     112    
64     64     
16     32     
-160   -32    
0      128    
-112   -48    
-224   16     
144    -48    
-448   128    
32     16     
-912   16     
64     48     
-112   -112   
48     64     
16     0      
224    336    
32     80     
-112   0      
-48    80     
112    176    
-224   80     
-48    80     
0      32     
-160   -32    
32     48     
-336   -32    
64     160    
-96    48     
-288   -448   
256    -208   
-176   48     
-128   64     
-80    -48    
-144   -48    
176    48     
-32    144    
-16    48     
32     80     
32     112    
-160   64     
-400   32     
176    112    
-480   80     
160    -32    
112    -128   
-208   32     
272    128    
-480   -32    
160    160    
-224   128    
-48    -16    
64     0      
-48    -144   
-128   48     
176    256    
-464   0      
80     16     
-1152  -16    
240    272    
-208   96     
-16    -48    
192    0      
64     32     
-16    96     
-16    48     
-64    48     
32     48     
192    112    
-112   -16    
192    112    
-336   48     
-16    176    
-240   320    
80     -16    
-16    -144   
-48    -64    
32     -48    
144    208    
-32    384    
-208   48     
80     80     
80     48     
80     16     
-256   -176   
16     144    
-176   -144   
64     -32    
-96    -96    
-352   -816   
-384   -992   
176    -288   
-16    48     
-64    -16    
-128   96     
96     32     
32     224    
-208   -352   
32     -432   
-192   -304   
-224   -832   
-208   -560   
176    -320   
-160   -272   
32     176    
32     208    
0      112    
176    -64    
32     0      
-176   -208   
176    96     
48     96     
-176   -48    
-80    256    
128    208    
0      64     
64     496    
224    400    
-208   -368   
-48    -592   
80     608    
-64    -32    
48     -288   
288    208    
-224   368    
-400   -912   
320    -592   
208    448    
-160   48     
64     -288   
0      304    
-48    -32    
-32    64     
-128   272    
96     -128   
-32    288    
-16    144    
336    -176   
-176   160    
-112   160    
64     -64    
64     -16    
96     176    
112    80     
32     -32    
-272   96     
48     -48    
80     16     
-304   64     
272    112    
-96    96     
-16    16     
80     64     
32     96     
0      112    
-80    240    
-80    -64    
-96    -496   
64     -144   
16     -48    
32     144    
112    32     
48     -48    
-48    128    
-336   -704   
-128   -560   
192    -304   
0      0      
-16    320    
-96    256    
48     -192   
96     16     
80     272    
80     272    
0      256    
32     112    
-48    -96    
-128   -2416  
16     -272   
144    -16    
-48    112    
160    -32    
-368   96     
352    96     
-80    80     
48     96     
0      32     
32     64     
128    96     
-16    80     
64     64     
64     80     
64     -976   
-144   16     
112    128    
32     48     
0      144    
64     -128   
-32    -496   
96     -16    
-48    192    
144    160    
160    288    
-32    256    
0      -16    
-32    -288   
-112   -48    
400    96     
-240   48     
320    240    
-80    160    
0      0      
160    -96    
32     112    
304    304    
16     144    
176    416    
32     224    
160    48     
-240   528    
-64    -544   
256    -48    
-128   -160   
160    64     
-48    -64    
192    1152   
240    816    
-496   -288   
0      -992   
144    512    
-16    -144   
64     144    
48     -64    
-80    48     
144    304    
64     -304   
64     -80    
-160   -1008  
48     256    
-16    -32    
32     -64    
144    -1440  
-32    208    
224    0      
-48    -80    
16     -48    
240    400    
0      240    
-272   -576   
240    -176   
176    -48    
-48    16     
-128   -256   
96     64     
-48    320    
-192   -48    
80     -416   
80     64     
-96    -64    
96     16     
80     0      
176    240    
0      96     
-32    48     
128    96     
16     -160   
-240   0      
480    -176   
-16    384    
-32    -80    
-112   -96    
144    -672   
-16    0      
32     -48    
48     -32    
32     -64    
272    320    
-96    32     
112    16     
48     240    
80     128    
-208   224    
128    -144   
-48    0      
64     -368   
-128   64     
-16    -368   
304    -96    
-48    80     
80     80     
-32    32     
32     32     
160    48     
64     208    
-144   48     
96     -144   
0      -64    
176    -240   
176    16     
-48    -240   
80     32     
16     32     
192    128    
-48    0      
320    16     
-16    256    
-16    -832   
64     -848   
112    112    
176    -816   
-48    0      
-32    448    
-16    -176   
304    192    
-288   -128   
128    176    
272    304    
-592   -1136  
-160   208    
320    -560   
-16    80     
-480   0      
208    -160   
-48    0      
64     -32    
16     -112   
96     -1088  
32     -32    
288    -96    
64     80     
144    -64    
-256   -32    
240    -192   
-176   0      
160    -112   
32     16     
-192   -16    
32     -96    
-176   -112   
160    -240   
32     16     
288    -16    
0      -16    
144    -64    
224    -32    
64     -16    
-368   48     
80     0      
-96    144    
208    48     
-80    -144   
-160   -96    
-48    -112   
-208   0      
-16    -96    
16     -176   
128    16     
32     -240   
32     -208   
64     -112   
-48    -1360  
-80    96     
128    96     
64     -96    
-16    -16    
336    176    
-256   -240   
-112   96     
80     48     
-16    0      
128    16     
160    32     
64     -16    
0      -80    
-80    -128   
96     -304   
160    400    
0      -128   
-16    48     
-128   -160   
96     -16    
16     128    
-160   16     
64     80     
-128   -112   
-288   -144   
192    -160   
-320   48     
48     -48    
48     32     
-32    -416   
336    192    
-208   64     
64     48     
176    64     
-368   -176   
16     -16    
48     -208   
-176   -96    
32     -176   
-208   16     
192    16     
32     48     
64     -112   
-48    -32    
-32    -896   
128    32     
64     256    
80     160    
-48    16     
96     16     
-32    -16    
48     80     
-176   -64    
0      -16    
-112   -16    
112    80     
48     -128   
144    -192   
32     48     
48     -112   
112    80     
176    -576   
16     80     
-496   96     
16     -16    
-80    80     
-64    32     
0      64     
-16    16     
-16    176    
48     64     
-384   272    
-16    -176   
-128   16     
128    -16    
-176   48     
-288   -368   
96     -672   
-272   -48    
288    320    
-48    -48    
288    240    
-144   -96    
256    -16    
-352   -64    
16     -64    
-48    -16    
-48    0      
240    256    
-768   -160   
96     -272   
-144   -80    
112    48     
-64    -320   
-416   144    
128    -112   
32     64     
48     96     
-48    48     
-112   96     
-448   -32    
48     112    
-112   -304   
0      -96    
-160   -576   
-272   -352   
256    656    
-352   32     
160    -368   
-304   704    
-48    160    
-48    -176   
-16    -160   
384    -272   
0      304    
-64    -64    
160    64     
-16    -256   
-16    176    
-64    -400   
80     -80    
208    256    
-112   -160   
-96    16     
-352   16     
-176   -144   
-224   176    
48     208    
-64    528    
80     -416   
-448   -240   
336    416    
-240   192    
64     48     
-176   -256   
48     176    
0      -176   
-48    112    
48     -80    
-416   -48    
144    -208   
-32    160    
32     64     
-720   48     
144    -272   
80     64     
-448   -48    
-192   -368   
-288   -640   
-64    208    
32     64     
240    608    
-528   352    
-240   -912   
144    720    
-128   352    
-304   -240   
176    112    
-512   -112   
80     224    
-304   -288   
-96    -464   
128    512    
240    416    
-64    -208   
-352   -240   
-16    -192   
32     272    
256    688    
-96    320    
-208   -112   
96     48     
-64    464    
-320   -160   
-208   -304   
-368   -400   
-192   192    
64     48     
64     144    
96     80     
-144   16     
496    256    
-464   -16    
-16    128    
160    48     
-192   64     
32     -32    
-112   48     
-192   -384   
0      -48    
-112   48     
0      160    
-64    -336   
-80    -272   
128    384    
32     288    
32     416    
16     64     
32     80     
-16    112    
-128   128    
-208   48     
-16    -592   
0      256    
112    48     
-304   32     
-16    224    
-16    -80    
64     144    
320    416    
-384   192    
-144   -512   
-128   -1232  
16     -624   
0      64     
464    560    
-528   144    
16     80     
-64    -80    
96     64     
-224   -80    
160    48     
64     112    
32     48     
-48    48     
64     16     
48     64     
208    32     
-288   144    
176    -64    
0      -48    
176    336    
-96    -80    
16     -80    
80     -16    
16     256    
-112   32     
272    272    
-320   240    
0      -160   
32     -48    
-128   -96    
128    208    
16     336    
-208   -176   
96     192    
-160   336    
-128   112    
-64    -336   
80     96     
-64    -96    
-96    -80    
240    48     
0      448    
16     272    
160    96     
-48    112    
-112   -160   
-112   -16    
-16    -272   
128    -32    
80     112    
48     240    
-160   48     
256    112    
-16    64     
-80    0      
48     112    
96     -16    
32     -80    
128    464    
-128   192    
-128   96     
176    80     
-16    -32    
96     144    
-144   -48    
192    48     
-128   -128   
-48    16     
192    80     
80     32     
96     208    
112    112    
160    144    
112    48     
32     64     
112    112    
48     48     
128    176    
-144   64     
-272   -256   
224    208    
-176   32     
112    224    
-80    80     
32     -32    
48     -48    
96     -16    
16     32     
-16    -48    
432    256    
-64    -32    
16     48     
-48    128    
-16    0      
-176   -64    
160    48     
96     224    
-16    -1424  
-48    128    
176    32     
-32    112    
48     80     
64     32     
96     144    
96     48     
-16    48     
64     64     
80     80     
176    80     
-320   80     
384    -160   
-192   -64    
-64    -560   
96     -112   
192    48     
80     -64    
-64    -48    
128    240    
-80    144    
16     0      
128    64     
112    160    
0      208    
-32    48     
0      240    
16     16     
-160   80     
16     -240   
-32    -64    
-128   -1296  
64     80     
-16    64     
128    0      
-16    128    
-48    64     
96     -32    
-464   16     
192    64     
-256   48     
-144   -16    
32     -144   
144    176    
144    -176   
-176   48     
80     -1040  
-48    -32    
112    48     
0      160    
112    -32    
48     128    
-16    176    
16     128    
-112   0      
160    128    
-144   -32    
32     16     
96     240    
-96    -48    
-192   160    
272    -160   
-48    96     
80     -144   
0      32     
80     -32    
32     32     
32     64     
64     64     
-112   -176   
80     -32    
80     192    
-96    -48    
48     112    
96     -160   
-32    80     
80     16     
208    272    
-96    -240   
48     32     
16     16     
0      112    
0      80     
-96    96     
16     32     
16     -48    
192    304    
0      -400   
-144   48     
416    384    
-320   160    
144    -176   
-96    128    
176    -96    
32     48     
32     80     
48     48     
48     16     
112    48     
96     144    
240    -16    
48     288    
-32    -112   
-16    96     
0      -64    
-64    0      
64     -64    
128    96     
-256   -1392  
80     -208   
64     96     
96     -16    
-112   0      
48     -1456  
384    -48    
-304   -64    
112    -48    
-16    -96    
176    224    
-64    -288   
-16    0      
64     -224   
160    80     
96     80     
-32    64     
128    304    
-112   -144   
48     272    
-1296  -80    
-16    0      
-32    -96    
64     -240   
48     -368   
96     -224   
48     -112   
-48    80     
-64    16     
80     48     
0      -272   
0      -576   
48     -80    
96     -416   
48     48     
-320   -64    
64     -128   
48     -96    
-16    -304   
0      -144   
-48    -1168  
-144   -352   
80     -944   
128    144    
96     0      
96     0      
96     32     
80     -64    
-80    224    
112    192    
-64    -128   
80     -176   
-1344  -384   
192    368    
-128   -384   
-128   -608   
256    -128   
-64    -624   
208    -112   
-192   -624   
-32    64     
-48    -208   
-64    -160   
96     -16    
64     64     
-416   96     
64     -96    
-592   -160   
144    176    
144    -256   
-112   48     
256    112    
-32    48     
16     -80    
-80    -272   
-48    -128   
272    -160   
80     256    
112    288    
-48    128    
-32    624    
160    48     
-576   -432   
0      -160   
-880   64     
80     -80    
624    464    
-464   -160   
0      -352   
528    16     
48     560    
80     -32    
112    -80    
-128   -32    
224    -96    
-192   -208   
336    -416   
-32    -48    
0      -272   
-1568  48     
224    -432   
384    -160   
-256   240    
416    -48    
-32    -160   
80     176    
224    -1600  
-32    112    
112    288    
-16    480    
-64    272    
96     112    
-16    -48    
-96    -96    
-128   -208   
32     112    
-192   16     
-48    -96    
128    96     
16     -304   
-416   -544   
-64    -1120  
480    384    
-128   448    
144    -240   
-80    -16    
64     -240   
-256   -448   
32     -64    
-160   432    
240    0      
-112   -160   
-96    64     
448    16     
-80    -112   
528    400    
176    736    
32     240    
-496   -224   
512    -656   
-48    -64    
176    576    
-32    -288   
320    80     
144    512    
-304   -512   
-32    -176   
192    544    
112    256    
-16    -320   
720    912    
-640   544    
160    -816   
240    256    
-160   464    
-368   -288   
144    -640   
144    192    
-272   -144   
384    0      
-896   -144   
128    96     
-624   16     
-48    256    
-96    -144   
-432   48     
-144   128    
-48    -416   
64     144    
-96    -64    
16     224    
-1008  336    
-64    -64    
64     352    
-32    144    
-288   32     
16     0      
160    -80    
-240   -240   
208    272    
-416   -208   
16     -48    
0      32     
16     112    
-112   16     
-32    80     
32     800    
-240   240    
0      -416   
128    464    
-128   -80    
64     16     
-64    32     
0      144    
80     224    
-128   -96    
176    80     
-320   80     
48     48     
-80    16     
-16    32     
-368   160    
160    80     
-320   48     
112    -112   
-32    -224   
-16    -96    
0      -288   
-32    -64    
-32    -416   
-80    -160   
128    -32    
-208   32     
240    192    
-208   96     
32     176    
160    0      
-80    -160   
-32    320    
-496   336    
-224   -160   
192    144    
96     -32    
-112   -32    
-48    0      
64     -16    
-112   16     
-176   -48    
112    -32    
-176   96     
96     176    
-112   0      
96     48     
-400   -64    
32     64     
-480   -96    
-32    144    
48     -48    
-48    16     
-144   -144   
-32    64     
-112   64     
-32    96     
32     0      
32     160    
-80    0      
-48    176    
368    32     
-112   32     
80     -64    
-416   -64    
176    -112   
16     16     
-48    32     
-64    80     
-32    48     
288    272    
-240   112    
32     112    
-160   -16    
112    80     
-160   16     
16     96     
-64    64     
0      80     
-176   -128   
192    96     
0      144    
-64    -48    
272    96     
-144   48     
-112   -48    
160    48     
-64    48     
-96    -80    
-80    80     
-16    80     
-48    64     
-144   16     
-16    16     
-480   -208   
160    -48    
32     16     
16     112    
160    96     
288    16     
-80    0      
144    144    
-32    16     
224    224    
-128   304    
-64    64     
192    32     
-16    16     
80     112    
-112   48     
48     80     
0      80     
176    208    
-144   16     
-160   -16    
96     -32    
-96    -32    
0      80     
-192   48     
-96    32     
-128   48     
32     160    
-352   -48    
336    448    
-64    160    
-160   64     
16     80     
-32    64     
112    -32    
-80    32     
-32    -16    
32     -160   
256    96     
320    224    
0      32     
224    -48    
272    176    
-256   48     
112    32     
224    32     
-352   96     
0      -160   
-80    -16    
352    80     
-192   96     
80     176    
-64    112    
-208   -64    
80     -208   
160    0      
320    128    
-256   80     
96     -96    
160    -48    
64     48     
80     80     
160    64     
288    256    
-304   64     
32     0      
192    -48    
0      -224   
-112   128    
-16    80     
-64    64     
16     0      
80     96     
0      64     
64     112    
-64    112    
176    192    
32     208    
-224   64     
-16    32     
64     64     
128    224    
112    0      
-64    16     
-16    -32    
64     176    
-16    32     
-64    16     
80     128    
32     -560   
128    96     
64     96     
32     96     
128    64     
-192   80     
16     -32    
-32    48     
192    176    
32     160    
-112   64     
128    112    
48     -48    
192    -48    
16     240    
-96    16     
-32    208    
144    32     
32     0      
176    32     
-80    0      
-96    -464   
320    -32    
16     64     
-80    96     
0      112    
128    144    
-208   48     
32     -80    
-32    64     
-16    -752   
32     80     
48     80     
-128   128    
272    16     
-208   16     
-16    -576   
-80    -80    
240    -272   
-144   -32    
112    32     
-80    -192   
-16    32     
-32    -160   
16     -256   
160    16     
80     80     
128    -448   
32     256    
0      224    
96     -160   
-80    -208   
160    96     
-144   224    
96     128    
-192   -96    
144    -240   
-64    832    
112    -416   
16     224    
-16    80     
-16    -64    
64     -240   
-16    208    
64     -1200  
-208   -176   
-32    -224   
160    928    
112    1152   
-80    48     
-192   -560   
144    128    
-64    192    
96     -48    
80     32     
-16    -80    
-96    -96    
80     -1904  
96     48     
-64    -336   
32     144    
32     80     
64     96     
0      48     
80     128    
-64    288    
144    176    
32     -16    
-16    -176   
208    -64    
-80    -352   
128    0      
528    304    
-272   464    
-64    0      
-256   -48    
448    -704   
16     -448   
336    288    
48     288    
160    48     
224    192    
368    464    
-64    -96    
-160   0      
64     -272   
-400   -336   
0      -288   
-224   -32    
256    -368   
160    176    
-16    256    
0      80     
416    -32    
-240   224    
448    -256   
-160   -528   
-128   -544   
0      -736   
-160   -48    
288    -96    
48     160    
96     -64    
304    368    
-224   192    
144    -112   
-48    -400   
160    -752   
-32    64     
-2192  -192   
320    64     
-208   384    
240    416    
-32    -80    
32     -432   
96     -240   
-304   -80    
528    80     
-80    160    
64     48     
112    -208   
144    112    
400    -32    
-304   256    
16     -336   
32     -112   
272    -368   
-80    -656   
16     304    
-80    -1072  
64     -16    
160    224    
0      176    
160    -192   
176    160    
-32    0      
64     304    
48     128    
112    -112   
-240   -32    
96     16     
-112   64     
272    48     
-208   -368   
240    -336   
-64    656    
48     -752   
112    -16    
-160   -16    
-16    -80    
16     -240   
96     -32    
112    -80    
80     -352   
-128   80     
-240   -224   
-272   -208   
48     -224   
-80    -208   
192    -64    
32     0      
0      -128   
-112   -176   
-80    -512   
-16    0      
96     160    
-48    96     
64     160    
64     112    
-48    192    
448    320    
-336   496    
144    144    
-192   -64    
160    112    
-48    0      
0      144    
80     80     
-64    -1008  
-16    16     
64     -16    
160    96     
-240   -336   
-64    -48    
112    32     
-16    -240   
48     -272   
112    -48    
-560   -80    
0      -240   
-336   0      
160    -192   
-96    144    
160    192    
112    240    
80     208    
240    -96    
-224   -16    
32     208    
-16    144    
32     288    
-32    16     
80     16     
-256   224    
-240   -32    
256    -128   
16     -144   
208    48     
-48    -208   
192    208    
-16    176    
16     -32    
-96    -16    
128    48     
-112   192    
272    160    
-592   -112   
208    -16    
80     16     
-64    -208   
208    96     
272    64     
-208   368    
0      -128   
48     48     
-224   0      
112    -48    
64     -16    
0      -32    
-272   -160   
64     -96    
-64    -48    
-128   48     
-48    -16    
-32    -32    
-48    0      
144    -48    
-48    64     
128    -144   
96     144    
16     64     
-32    32     
112    32     
16     0      
16     48     
-128   -48    
160    16     
-16    128    
-32    48     
-48    -96    
80     80     
-1456  -112   
192    176    
-48    128    
-336   -32    
-64    -80    
-448   -16    
-64    -64    
96     80     
-144   -64    
112    -192   
-144   -176   
112    240    
0      400    
-592   -128   
-48    -288   
-224   -224   
-16    32     
80     -96    
-560   0      
-32    -80    
-144   -128   
16     112    
-560   0      
192    0      
-448   16     
64     0      
96     -96    
32     64     
-64    -144   
64     128    
48     -80    
0      112    
192    176    
-288   -16    
112    128    
48     0      
-16    32     
96     48     
-112   0      
-160   -272   
-160   -80    
16     -16    
-112   48     
-176   176    
544    -48    
-176   32     
224    32     
64     -16    
48     96     
32     16     
-96    48     
32     48     
-208   0      
480    624    
-1040  176    
208    64     
-656   64     
128    96     
-16    -128   
80     112    
64     -160   
-16    48     
16     96     
-112   -32    
96     128    
-64    16     
-80    0      
-64    64     
-96    -16    
144    288    
192    240    
-448   -144   
720    672    
-640   -64    
272    80     
-128   64     
96     -16    
-64    -32    
-32    112    
-48    -32    
192    48     
-320   32     
240    -48    
128    96     
208    96     
48     48     
-448   -144   
192    32     
-560   128    
48     112    
80     112    
-96    -32    
16     160    
-64    80     
-144   64     
144    16     
-16    80     
0      48     
192    224    
-464   80     
-64    -64    
-96    -64    
160    -32    
-64    112    
-80    64     
16     80     
-80    -48    
0      128    
112    192    
-192   160    
-240   -96    
64     64     
-112   -32    
-144   -48    
64     -48    
304    128    
-336   -48    
128    80     
-272   -144   
-240   -48    
48     -224   
144    0      
112    -16    
-80    96     
112    32     
16     128    
-48    0      
16     -16    
0      -64    
-80    48     
320    560    
-352   -288   
160    224    
-304   -624   
-112   -368   
256    272    
16     176    
128    176    
-288   -32    
-16    -464   
240    32     
-80    384    
32     128    
16     -176   
-112   -528   
256    560    
-240   -224   
64     -64    
16     144    
32     96     
-160   80     
160    80     
-16    32     
-144   -16    
32     48     
-16    80     
64     64     
-16    80     
144    240    
-288   -96    
400    96     
-80    464    
-32    -464   
32     208    
-64    80     
128    -80    
-32    160    
144    592    
16     416    
-64    192    
-16    64     
176    224    
-240   112    
64     112    
-112   -128   
-48    32     
0      -224   
-48    -48    
144    352    
-48    -144   
-16    -16    
-48    -32    
96     176    
-48    336    
-48    224    
0      224    
-320   -208   
96     -592   
176    144    
0      256    
-160   -320   
-144   -1088  
176    -368   
80     -176   
-80    -496   
128    -240   
80     256    
0      192    
80     80     
-64    64     
-32    16     
-64    112    
64     64     
-48    144    
224    -32    
-96    112    
64     -48    
128    -112   
80     80     
192    176    
112    432    
-64    304    
80     -144   
208    -96    
-176   -64    
80     48     
144    224    
-64    -64    
-192   -192   
32     80     
-304   800    
368    -400   
-192   -880   
-32    -16    
-64    -320   
112    -48    
16     -176   
176    64     
176    -64    
496    592    
512    688    
-224   128    
240    -368   
-80    -176   
192    272    
160    -128   
112    80     
144    224    
176    -32    
-384   -576   
400    176    
176    928    
-224   432    
272    -240   
208    64     
128    128    
-96    -112   
-144   -48    
160    240    
-144   -80    
160    -496   
336    480    
400    592    
-16    16     
192    -880   
176    256    
-320   -336   
96     736    
-32    176    
224    288    
-432   -656   
0      -48    
48     304    
128    576    
48     128    
16     -128   
112    416    
160    336    
304    432    
-80    160    
-32    0      
128    -528   
128    0      
64     -64    
160    272    
-96    576    
304    464    
-48    32     
-16    208    
64     0      
-16    -496   
288    -64    
0      -64    
112    80     
-80    -432   
128    64     
-240   -752   
-48    -192   
-80    -64    
304    176    
-112   -16    
144    112    
16     16     
48     48     
160    48     
128    -16    
-32    -128   
48     -320   
208    112    
-192   -688   
320    368    
-272   96     
32     112    
96     48     
64     0      
-80    16     
96     16     
-32    -80    
0      384    
464    496    
-544   80     
48     -16    
160    -224   
-48    32     
-64    -144   
96     -16    
192    -16    
112    112    
80     64     
80     128    
48     96     
208    128    
-80    64     
64     -224   
16     96     
48     -320   
144    64     
64     -160   
0      80     
0      -32    
-16    -128   
-64    -320   
112    96     
-80    48     
64     48     
96     96     
176    32     
-64    -880   
192    0      
-16    -1104  
240    -144   
80     224    
128    -16    
16     48     
-16    -32    
80     64     
-80    -80    
112    -2000  
-16    32     
160    -80    
-96    64     
16     -16    
48     -144   
-16    -16    
144    -480   
-32    16     
64     -688   
96     64     
0      144    
-144   -208   
256    64     
-32    64     
80     0      
32     0      
64     -96    
192    112    
-688   64     
-64    -240   
96     48     
144    -144   
-144   0      
112    -528   
0      -96    
0      -2608  
32     -16    
16     160    
0      -64    
128    -144   
-112   64     
48     -144   
224    192    
-368   48     
48     112    
-128   16     
-32    -16    
32     -80    
48     -144   
112    0      
-272   -144   
416    -80    
48     -128   
48     64     
96     -176   
80     16     
-32    -32    
176    16     
112    -80    
-64    -96    
-1152  -112   
128    -160   
160    -96    
-160   16     
176    48     
32     -96    
-64    64     
176    -1136  
0      -128   
-64    -224   
96     -16    
0      -128   
112    96     
-144   -96    
0      0      
-96    -16    
128    -32    
-1120  -16    
-16    -16    
176    128    
-80    -224   
-192   -32    
272    -640   
-112   128    
176    48     
-16    -16    
48     -80    
32     -32    
-32    32     
32     -80    
-16    0      
-64    -64    
16     64     
-80    -48    
-880   -64    
0      -128   
240    256    
-240   -272   
48     -16    
-32    144    
0      112    
144    -224   
80     -80    
128    64     
-16    -144   
16     16     
128    48     
-560   -80    
-48    -112   
32     64     
256    288    
-128   368    
-80    -16    
208    80     
208    -608   
-48    -176   
-128   32     
144    -48    
-176   64     
-32    -128   
-208   -32    
48     -144   
-80    48     
32     -112   
144    48     
32     -128   
-128   128    
336    -160   
-384   112    
-112   -160   
208    0      
-208   144    
128    32     
-240   -64    
80     0      
48     192    
-32    16     
160    208    
16     -32    
0      240    
576    16     
-256   112    
-800   -144   
96     640    
272    288    
-784   -112   
-144   -96    
-1376  -448   
-32    -112   
192    48     
-128   160    
0      144    
16     96     
-864   -176   
32     16     
-352   -176   
-64    -32    
-176   -64    
64     96     
-208   48     
-208   -224   
-144   -64    
-944   -64    
-128   0      
-576   0      
64     -128   
64     16     
-384   128    
-80    -192   
-32    352    
-144   64     
128    224    
208    144    
-64    224    
-80    -304   
-192   160    
16     256    
-144   -176   
-80    160    
112    -176   
-352   240    
32     -560   
0      208    
32     0      
-96    16     
32     -64    
-96    -112   
48     176    
16     -160   
-64    336    
96     -320   
32     288    
-32    32     
32     -144   
-320   368    
-288   -48    
-32    64     
-144   96     
112    -48    
16     160    
16     144    
-64    -48    
0      112    
-144   -144   
-48    96     
48     80     
16     32     
-112   -80    
0      0      
-480   -32    
0      80     
-192   -80    
64     80     
-64    -112   
-112   -64    
96     -528   
-96    160    
-32    160    
192    112    
-128   240    
-48    16     
-64    -32    
0      -96    
-32    -80    
224    192    
-48    256    
-208   -144   
256    96     
-592   -16    
240    160    
0      -16    
-80    0      
16     96     
-208   -32    
144    -32    
-32    -96    
128    -48    
96     128    
-128   -112   
-96    144    
-128   80     
-256   64     
16     112    
-688   -64    
160    160    
-192   -16    
-32    32     
-288   -128   
320    -640   
-48    -240   
160    144    
-368   -208   
96     -272   
-48    0      
-176   48     
64     32     
-112   48     
112    96     
-560   0      
96     96     
-16    48     
-32    16     
-64    48     
256    96     
-128   48     
128    80     
-48    -96    
0      480    
144    512    
-96    256    
16     32     
-96    -112   
-64    -96    
32     16     
48     288    
-144   0      
-64    32     
-176   -352   
176    -1168  
288    448    
-96    688    
-48    -480   
112    176    
-32    96     
160    16     
-96    96     
-48    272    
176    352    
32     304    
80     -64    
0      80     
96     64     
-96    -160   
208    -128   
-48    416    
-144   128    
176    -192   
-80    -16    
112    -80    
-144   16     
128    208    
-320   32     
96     80     
64     64     
192    240    
-160   64     
-48    -48    
80     -176   
272    352    
176    624    
208    304    
0      80     
416    384    
-144   224    
-16    -32    
-32    32     
112    -64    
-176   160    
112    144    
160    608    
32     64     
-96    -80    
176    112    
-64    -16    
-208   -304   
256    224    
-16    64     
-480   -144   
416    -112   
-320   96     
368    144    
-320   0      
-16    -368   
48     128    
-112   -64    
80     -64    
-224   -48    
416    128    
16     64     
272    16     
-96    64     
48     80     
-96    -48    
128    128    
-48    16     
-32    -96    
-16    -128   
80     16     
-32    0      
240    128    
-144   16     
96     112    
16     -32    
256    -32    
32     160    
64     80     
-32    0      
240    240    
-368   48     
80     -32    
16     80     
32     48     
64     -656   
-144   -80    
176    112    
16     160    
-144   -128   
176    -128   
-32    160    
160    32     
64     64     
256    240    
-160   80     
-80    160    
-112   -112   
176    -336   
272    128    
64     -464   
176    96     
96     208    
-160   48     
-16    112    
96     32     
16     48     
160    208    
112    16     
0      96     
32     32     
160    80     
-96    128    
-48    -48    
0      112    
64     -752   
80     176    
176    160    
-112   -16    
64     80     
64     64     
-32    48     
64     64     
-224   -128   
80     32     
48     112    
224    160    
-192   80     
64     32     
80     128    
-112   -256   
128    96     
112    -720   
32     80     
-240   64     
320    -48    
-64    -208   
208    128    
-272   -80    
304    64     
-64    144    
112    128    
64     64     
-32    -160   
80     80     
-176   -224   
240    -64    
64     48     
128    -32    
-192   -336   
224    96     
-48    16     
112    96     
-16    -176   
80     64     
160    64     
-80    96     
-96    16     
176    -80    
128    64     
64     16     
64     16     
176    160    
32     16     
-16    -1232  
144    112    
0      112    
0      80     
-96    -176   
112    64     
-112   208    
48     32     
32     32     
144    -400   
-16    32     
144    -128   
160    80     
-128   -240   
128    128    
288    -48    
-16    96     
0      48     
16     80     
-96    64     
0      272    
192    128    
128    -416   
-16    -48    
208    48     
-48    160    
-80    -272   
128    112    
16     -96    
160    128    
-96    48     
112    208    
-80    128    
-128   32     
352    96     
-144   16     
96     0      
48     -48    
32     112    
-16    -144   
-144   48     
80     -320   
-48    64     
208    80     
-128   112    
-64    -208   
-48    -592   
96     96     
16     -224   
48     32     
-208   -256   
80     -432   
96     -64    
16     -688   
80     48     
-32    304    
-48    -32    
240    128    
-16    80     
16     -288   
80     144    
0      0      
-32    112    
-64    -96    
528    656    
-1088  688    
-240   32     
-64    128    
192    64     
-208   -576   
48     -864   
256    -272   
16     -224   
224    16     
-256   192    
112    64     
-96    -32    
144    0      
48     -80    
144    -64    
-128   -48    
-144   -112   
-352   -256   
-32    -96    
560    528    
-416   208    
-16    128    
-64    -512   
208    -48    
128    -224   
-176   48     
224    -240   
32     16     
80     -272   
-64    -320   
64     -352   
64     -352   
-96    48     
192    128    
-64    128    
64     176    
176    -16    
-256   -480   
-400   -832   
32     -976   
-64    256    
176    256    
-16    112    
-48    -144   
176    80     
-80    -368   
160    64     
-592   -144   
224    -176   
-1216  128    
-48    -272   
-96    -80    
160    96     
-176   -144   
144    -2032  
64     288    
176    -144   
-16    64     
112    64     
-32    80     
-64    -32    
48     -128   
-336   -80    
-32    -128   
-608   -64    
304    -240   
16     -272   
528    416    
-48    976    
0      -288   
-112   -624   
128    -224   
16     -80    
-96    128    
192    -48    
-16    144    
-64    -64    
80     -16    
-144   -288   
-176   -48    
-112   0      
-320   -64    
96     -272   
0      48     
32     -240   
16     128    
-16    -1360  
16     -352   
192    -208   
16     48     
-192   240    
128    -16    
48     16     
-96    16     
-64    -64    
-80    -96    
-96    -96    
160    -80    
32     96     
16     -80    
32     0      
-160   16     
64     16     
-144   -16    
400    256    
-48    560    
64     192    
-128   224    
144    -160   
-240   -80    
-16    48     
160    128    
-32    144    
-128   -112   
352    -496   
-96    0      
96     32     
-160   -64    
64     -32    
224    -32    
-128   96     
208    16     
-144   112    
144    80     
80     48     
0      0      
-224   32     
-512   32     
-256   -272   
-848   -720   
-400   -128   
32     96     
-368   -16    
0      224    
-656   224    
-160   160    
-336   -400   
176    -560   
-208   -752   
48     -336   
-432   -720   
-32    -80    
-448   -256   
-80    256    
16     -224   
-32    -80    
64     80     
-16    96     
-208   -336   
416    -352   
-96    816    
16     80     
-64    0      
-48    192    
16     48     
-400   -240   
320    1120   
-256   -192   
-144   -368   
96     352    
-160   0      
-80    -128   
-224   -192   
32     0      
32     208    
-32    -128   
-960   -608   
144    416    
-368   400    
-256   16     
144    -368   
64     -32    
-128   -32    
240    256    
-32    160    
-48    -176   
-16    -48    
48     32     
128    -16    
-400   -176   
128    32     
-208   -48    
-96    32     
-384   0      
-144   0      
-16    -208   
48     48     
-176   -304   
-16    64     
-32    176    
-16    0      
-80    -144   
176    -160   
-16    32     
-48    -16    
32     48     
80     -80    
368    304    
32     224    
-64    0      
160    -272   
32     -16    
176    -80    
-224   -80    
192    -128   
48     -16    
224    288    
-144   -32    
-16    -32    
16     32     
-32    96     
-32    48     
-48    48     
-112   -64    
-80    144    
-272   -96    
0      48     
-16    304    
240    80     
-112   16     
-48    16     
144    64     
-320   32     
-96    -112   
464    272    
-176   -96    
256    96     
-128   0      
-64    -80    
-96    64     
80     -64    
112    32     
48     -32    
32     112    
-64    64     
80     -96    
112    128    
96     48     
48     128    
48     64     
-80    48     
-16    0      
-160   0      
0      -64    
96     144    
-272   48     
-64    64     
192    32     
-48    32     
-48    48     
176    112    
-176   64     
144    144    
-112   192    
-320   0      
-16    112    
112    -64    
-80    32     
-16    0      
0      128    
-400   -64    
-48    48     
-16    112    
96     112    
0      -80    
64     -32    
48     0      
-192   -16    
32     16     
176    32     
-16    48     
64     32     
64     32     
-320   -64    
160    192    
-320   -128   
176    144    
160    48     
-48    48     
176    80     
-48    80     
160    64     
-96    0      
80     96     
-16    160    
80     224    
16     -96    
-48    -16    
32     112    
192    -16    
-128   176    
208    176    
160    64     
-64    -48    
-32    32     
-176   -256   
400    -112   
-176   304    
224    64     
-96    48     
-16    -64    
64     16     
16     48     
-16    64     
0      128    
0      32     
-112   48     
352    48     
-176   112    
0      -32    
-32    -80    
144    32     
-144   112    
48     96     
-80    -32    
32     32     
-64    -64    
64     48     
-48    0      
-80    96     
96     80     
-64    -32    
16     -48    
224    128    
-64    96     
-16    96     
112    80     
-32    80     
32     80     
-48    16     
-16    48     
112    144    
-32    128    
48     128    
-16    -32    
192    192    
-192   64     
32     160    
48     32     
240    16     
-112   -80    
128    112    
-80    -64    
-64    128    
0      32     
-48    144    
-48    -32    
16     64     
64     64     
64     -2096  
288    272    
-208   192    
-32    80     
-64    -32    
320    112    
128    224    
-224   0      
192    112    
-16    96     
32     -128   
32     48     
-224   -288   
384    -352   
-48    -160   
-48    -144   
-48    80     
-320   -400   
208    -112   
-32    320    
176    240    
-64    96     
-32    32     
-192   32     
352    192    
-272   -192   
400    -16    
64     240    
112    192    
-48    176    
32     -224   
-48    -80    
32     512    
192    192    
-192   -32    
-32    96     
208    -224   
0      32     
-16    -80    
-48    176    
0      16     
48     144    
96     176    
32     64     
-160   -128   
288    -128   
0      -288   
0      -352   
64     224    
16     16     
416    608    
-320   -32    
-32    0      
-48    -464   
-16    160    
288    128    
-176   80     
144    64     
-80    -224   
112    224    
-16    48     
32     496    
48     -368   
-16    432    
0      -1584  
-144   -272   
0      -288   
32     144    
80     208    
208    0      
-144   160    
64     128    
272    128    
-64    352    
-80    96     
32     -576   
144    144    
-80    0      
176    -80    
-192   -272   
16     176    
64     496    
48     368    
-112   -368   
0      -432   
-112   336    
400    -576   
-64    160    
64     -464   
224    -192   
368    304    
-48    32     
-160   -528   
224    -64    
336    448    
-32    752    
80     256    
176    16     
-176   -320   
-112   0      
240    48     
-32    32     
240    144    
160    0      
-64    48     
-64    -128   
192    48     
-16    -64    
96     96     
128    96     
-48    32     
160    -192   
-80    -2336  
336    -32    
-992   -192   
272    592    
-16    32     
16     -976   
96     -240   
80     64     
32     80     
96     128    
-128   96     
384    192    
-96    272    
0      -1248  
64     -16    
48     -368   
-32    -16    
-224   -64    
48     -272   
0      -80    
176    -112   
-256   -320   
48     -1536  
16     -96    
80     112    
16     80     
-176   432    
320    -112   
-352   -336   
480    48     
-112   -96    
0      0      
-176   -64    
96     0      
32     -144   
32     -96    
64     -48    
-32    -80    
96     176    
192    -800   
64     -48    
240    896    
-16    624    
-160   -80    
-16    -208   
-96    -384   
96     -208   
-128   224    
80     96     
-304   -432   
144    -112   
128    80     
-128   -80    
-16    -800   
144    224    
32     288    
-192   -432   
432    176    
-64    416    
48     320    
-256   16     
176    160    
-304   -96    
208    16     
-256   96     
16     -368   
-32    -320   
160    256    
48     -272   
64     144    
352    528    
-512   -1136  
176    128    
288    208    
-192   272    
-32    -240   
64     -80    
-48    208    
112    -112   
-352   -288   
192    -32    
-416   304    
-192   -560   
176    -384   
-96    128    
288    448    
-144   -160   
112    288    
80     -16    
432    256    
-224   -16    
-16    -176   
224    16     
-128   0      
144    0      
-48    -176   
-256   336    
80     80     
-304   -32    
160    -560   
96     -224   
-128   -320   
32     80     
-32    112    
128    112    
-32    144    
48     -32    
-384   0      
-48    -192   
-112   -48    
64     -128   
-336   80     
112    -176   
-592   -128   
224    -320   
48     64     
16     -240   
208    160    
-48    128    
-16    -80    
-48    -160   
400    336    
-544   16     
240    16     
-272   64     
208    -80    
-160   48     
48     -80    
208    16     
-224   -48    
288    80     
256    352    
-368   256    
-288   -16    
-400   -112   
64     -112   
-96    112    
160    160    
96     64     
-16    -48    
304    32     
-192   -144   
32     -192   
128    32     
128    -112   
128    160    
-464   -64    
96     -144   
-208   144    
-864   80     
-208   0      
32     128    
-256   0      
224    0      
-304   0      
64     -16    
-32    16     
-480   16     
192    288    
-624   -144   
608    208    
-688   -112   
288    80     
48     48     
128    32     
-144   0      
-480   -64    
-16    -320   
160    -80    
96     32     
160    112    
-16    112    
-64    48     
160    208    
-432   -160   
16     32     
288    144    
-384   64     
32     80     
-336   16     
-208   -48    
-32    32     
-112   48     
-272   0      
-32    160    
64     16     
-112   32     
0      -128   
16     96     
-192   -176   
-160   80     
48     96     
-112   -32    
-64    48     
-112   -96    
-80    -64    
64     144    
-144   224    
-128   176    
-48    -16    
-384   -80    
112    0      
-288   -208   
192    80     
32     -64    
-64    32     
0      16     
-80    80     
96     32     
96     80     
-208   48     
224    80     
-400   0      
112    0      
-64    32     
-240   -64    
64     176    
-48    64     
-96    16     
128    -64    
-176   -112   
32     16     
-96    112    
192    32     
-144   32     
96     64     
-144   -64    
16     64     
-32    -48    
448    352    
-464   224    
32     80     
-496   -32    
176    144    
-48    144    
-288   -96    
176    -16    
0      160    
80     -16    
-112   0      
128    96     
-96    32     
-32    80     
-48    80     
-112   64     
-64    64     
-32    176    
-1104  -112   
176    128    
48     -16    
-48    160    
112    64     
-64    80     
32     80     
-16    48     
64     112    
-64    48     
112    144    
-32    128    
64     128    
-112   -48    
32     32     
-160   96     
-16    96     
-112   128    
-16    32     
0      -96    
-16    -96    
112    16     
-64    48     
-48    16     
160    -112   
48     -192   
-144   -112   
96     -176   
-208   -160   
240    32     
-288   16     
128    208    
-112   304    
-32    144    
32     240    
64     96     
-48    -16    
304    256    
-144   224    
-112   -16    
-256   -32    
256    80     
-16    128    
-16    -96    
160    -80    
-112   -208   
224    144    
0      320    
-48    16     
64     -16    
224    0      
16     640    
-176   64     
176    368    
-32    32     
32     -352   
-64    400    
128    352    
-80    64     
208    -160   
176    320    
-192   400    
-224   -384   
16     -208   
64     272    
-16    144    
-80    0      
112    288    
0      32     
-224   -112   
240    80     
144    384    
-16    -336   
-256   -224   
16     160    
-96    32     
192    240    
0      224    
112    -32    
-160   -48    
-96    -112   
0      -272   
-32    -96    
112    320    
-48    -16    
208    224    
48     144    
-80    -96    
-128   96     
64     0      
384    656    
-224   272    
-176   -528   
48     -192   
-64    16     
240    112    
-144   208    
16     -416   
336    -240   
256    0      
-144   208    
-496   -768   
1344   -272   
0      1392   
336    688    
-80    64     
16     80     
32     176    
64     400    
16     144    
-336   -96    
224    -400   
-304   -160   
-32    416    
-48    -304   
48     -352   
-32    128    
320    256    
-176   -304   
0      -2176  
-48    400    
64     160    
16     -192   
-368   -160   
320    -32    
-208   512    
80     0      
80     32     
-80    672    
-80    -256   
-112   144    
192    -464   
-96    -432   
16     352    
0      -1056  
160    -32    
64     80     
160    176    
16     112    
32     32     
-48    48     
64     128    
96     80     
16     96     
48     0      
128    176    
-144   400    
-48    -304   
32     -160   
112    -384   
272    -128   
-176   -80    
112    -96    
0      -176   
32     336    
304    336    
-96    336    
-128   -384   
48     -16    
32     240    
-192   -512   
224    -192   
288    16     
-224   128    
224    -272   
-48    -48    
128    -2320  
240    816    
64     -80    
-384   -480   
464    -48    
-64    144    
208    624    
-32    224    
80     64     
-16    368    
-32    -80    
160    -64    
-144   64     
176    -192   
128    96     
-16    -208   
16     112    
32     -272   
32     112    
0      32     
0      32     
48     -336   
80     -160   
336    560    
-64    784    
-48    -160   
96     -400   
-48    -16    
16     -208   
-144   -288   
80     -496   
272    320    
-208   -256   
176    -16    
-128   -176   
112    -160   
64     96     
0      224    
192    160    
-112   -128   
80     208    
32     -96    
-64    -48    
128    -400   
64     -96    
-32    -192   
32     -80    
16     -112   
-32    48     
16     -128   
128    32     
-144   -160   
160    -640   
0      -144   
416    -416   
-64    176    
48     -80    
160    80     
80     -16    
16     144    
64     -192   
160    192    
-160   -80    
80     64     
112    176    
96     160    
-32    -48    
48     -1456  
224    -48    
-16    -16    
192    160    
64     0      
208    32     
64     -32    
368    304    
-304   160    
160    176    
144    -80    
160    -512   
-16    0      
0      -576   
-272   352    
-672   -96    
144    -416   
224    -112   
-96    -320   
48     -160   
32     -960   
16     -144   
112    32     
96     0      
48     -192   
208    -80    
-64    -208   
240    16     
16     -464   
144    112    
-240   -128   
80     -96    
208    -32    
-112   -160   
-32    -128   
32     -288   
80     16     
-16    224    
192    -64    
16     400    
-64    80     
48     -288   
-80    0      
208    64     
64     96     
-144   64     
-32    -160   
208    304    
352    -64    
-272   32     
176    -208   
-304   -176   
112    -2080  
-64    -288   
176    128    
-144   368    
80     -32    
-48    32     
64     128    
352    -48    
-272   -64    
-64    -192   
-576   -64    
144    0      
80     352    
192    -32    
160    384    
-48    -672   
-256   -144   
-128   -448   
176    176    
-112   144    
-144   144    
-176   -192   
-16    -64    
96     48     
160    0      
-384   -192   
16     -64    
256    -240   
208    -208   
32     -256   
160    -32    
-160   208    
48     -272   
-48    64     
64     64     
240    384    
16     -16    
0      0      
-80    16     
-112   -128   
-48    -80    
48     -48    
-1216  -112   
-32    -112   
32     96     
32     -192   
32     48     
80     -768   
48     -16    
144    32     
-80    96     
48     64     
160    112    
-368   -64    
80     16     
-800   -64    
32     16     
-96    0      
48     -16    
-128   64     
16     -288   
96     32     
-16    -592   
256    192    
-160   -928   
96     32     
-304   16     
16     -32    
-128   16     
-96    0      
128    64     
0      80     
48     32     
0      16     
16     48     
96     -96    
-112   64     
160    -176   
-48    64     
32     48     
0      -64    
192    96     
96     80     
-176   64     
144    -48    
-80    -48    
272    16     
-240   96     
112    -32    
-704   16     
-64    -32    
144    48     
-32    -192   
64     -128   
-96    -48    
240    -32    
64     -48    
48     16     
32     -208   
-128   -112   
48     -80    
384    16     
-496   -48    
-128   -80    
208    208    
-32    16     
112    128    
-208   -224   
-160   -16    
-304   -128   
48     272    
-80    48     
64     176    
-80    400    
64     272    
-256   80     
64     96     
-96    -112   
-144   -64    
176    288    
-384   -384   
80     -176   
-176   -224   
-112   -160   
128    432    
64     240    
-112   -16    
-432   -96    
-96    -112   
-1600  -32    
176    -256   
48     -128   
32     240    
-48    16     
-112   -224   
-48    16     
16     224    
-80    192    
-32    64     
-16    48     
-64    0      
96     48     
-320   80     
-192   -224   
-208   128    
-32    96     
-880   -80    
48     96     
-32    -80    
-32    80     
64     -16    
-144   64     
-96    -112   
96     0      
0      528    
-128   48     
16     -128   
-160   64     
48     480    
16     240    
0      32     
-224   192    
-240   240    
-240   -368   
160    -16    
176    496    
-144   288    
-224   -16    
96     64     
-160   -256   
128    -368   
0      -48    
128    480    
128    464    
-400   -128   
144    -192   
-416   176    
144    48     
288    -224   
16     -64    
80     -176   
128    80     
432    752    
-240   352    
64     -128   
80     -64    
-64    -16    
-112   -96    
208    -32    
128    208    
368    432    
-272   -32    
-16    80     
-864   -32    
128    32     
128    -336   
240    -96    
128    128    
16     352    
-64    -160   
-96    -288   
448    144    
-64    1008   
-160   608    
-48    -160   
160    -16    
-160   16     
-48    0      
-432   -368   
-128   -64    
32     192    
-112   160    
-544   -272   
400    -816   
64     352    
-176   832    
-96    16     
32     32     
48     144    
64     -80    
96     368    
-368   -848   
96     -144   
-368   336    
160    -80    
-16    64     
-48    48     
240    320    
-224   304    
-224   -448   
96     -112   
160    432    
-288   544    
96     -256   
-176   -208   
192    240    
-336   -480   
496    176    
-256   128    
80     48     
-48    0      
144    112    
64     224    
-80    -80    
112    112    
-256   -224   
128    -432   
-128   64     
352    -32    
-384   176    
160    -32    
-144   -32    
96     160    
48     -144   
96     -112   
-16    48     
-176   -176   
272    -272   
96     96     
144    304    
-128   -352   
16     400    
-144   -176   
144    160    
-16    320    
16     -288   
-64    -96    
-64    -64    
-64    368    
128    256    
-128   -304   
0      -464   
0      112    
112    176    
16     208    
64     -16    
-32    -192   
240    -64    
128    368    
-96    80     
48     -224   
-144   -32    
192    224    
-32    336    
176    32     
0      160    
304    144    
-16    -16    
208    48     
-16    -80    
64     -16    
16     192    
16     16     
16     -80    
0      -32    
176    128    
-240   32     
208    128    
-48    48     
-32    -80    
128    -16    
48     128    
144    112    
-240   128    
224    64     
-48    128    
48     80     
-96    16     
48     32     
-128   -192   
288    16     
-96    80     
0      -224   
0      176    
80     144    
-64    80     
96     48     
96     -112   
48     64     
64     32     
-32    -48    
128    64     
-128   16     
256    160    
-144   -32    
96     -80    
0      112    
96     -16    
-96    48     
16     96     
112    -80    
-112   144    
160    80     
-128   48     
112    64     
96     16     
16     64     
112    32     
-96    176    
144    -16    
0      -16    
128    96     
-16    -768   
128    96     
80     96     
32     128    
128    80     
16     48     
144    -80    
96     -256   
272    -112   
-224   208    
32     160    
192    80     
16     176    
144    -192   
-128   -32    
448    -432   
0      448    
-144   -912   
64     176    
32     -16    
16     48     
80     368    
192    144    
-112   -240   
0      64     
64     -368   
-48    -80    
80     64     
-32    -112   
96     112    
144    -160   
-144   48     
288    -912   
48     288    
32     64     
-32    32     
160    -144   
256    192    
-352   192    
0      96     
-144   -32    
32     16     
96     192    
-64    -16    
144    80     
48     -128   
112    128    
-32    96     
-304   -512   
448    -64    
-176   240    
-48    -192   
0      96     
32     48     
112    192    
48     368    
16     64     
-64    -48    
80     -304   
112    -48    
80     -240   
80     64     
128    -464   
240    192    
-32    -16    
-176   -64    
160    176    
176    -32    
-144   80     
128    112    
48     96     
-96    -64    
352    192    
-112   -272   
336    224    
-48    -80    
192    160    
160    -128   
-336   176    
192    -240   
-32    112    
144    48     
0      96     
-160   -16    
224    -128   
-48    -48    
80     -112   
128    144    
-240   0      
112    240    
-128   0      
128    96     
-32    -64    
16     256    
128    -176   
-80    32     
224    96     
-112   -176   
-16    -16    
-352   -208   
16     -608   
112    -176   
0      -1104  
128    -48    
64     -16    
144    -336   
-48    -112   
176    -96    
-32    192    
144    16     
32     -608   
0      48     
96     -272   
-80    208    
-320   80     
0      -304   
-96    -64    
192    -32    
128    -96    
-32    -1072  
-80    -192   
96     32     
144    -32    
272    256    
16     128    
0      80     
-112   0      
112    0      
48     -112   
-144   112    
96     80     
128    -144   
0      -288   
-80    272    
224    240    
48     16     
96     -576   
176    48     
-112   -96    
-48    32     
112    -32    
16     16     
160    48     
0      -80    
-48    -64    
48     -96    
-288   -32    
112    -176   
48     -16    
80     0      
0      32     
-96    -1008  
64     -544   
192    -400   
240    288    
-208   -672   
272    352    
208    416    
-240   160    
0      -368   
112    400    
-288   -80    
-48    352    
80     64     
-112   144    
16     64     
0      -416   
-80    96     
144    -384   
-80    144    
112    -176   
16     16     
-48    -80    
96     -160   
80     32     
304    304    
-192   -176   
80     240    
-864   0      
32     -112   
64     -112   
128    -144   
-16    128    
208    48     
-160   -32    
224    0      
32     336    
96     480    
176    16     
-80    -48    
112    0      
-80    -64    
112    -128   
-896   -80    
96     -80    
-128   16     
-32    -208   
16     32     
0      -528   
64     32     
0      -48    
112    48     
-48    48     
112    16     
-64    -96    
-80    32     
-224   192    
64     320    
-144   96     
48     -160   
-32    -16    
64     -272   
80     16     
0      -128   
48     -240   
-416   -400   
112    -208   
-512   -96    
-64    -272   
-240   80     
-128   48     
512    400    
-384   304    
-80    368    
224    -16    
-736   -512   
304    -112   
-272   192    
144    -208   
-96    -64    
-272   -160   
352    -176   
-464   -336   
-144   -400   
-336   -16    
112    -304   
64     -96    
32     272    
-304   176    
80     -80    
16     144    
-352   -256   
112    128    
-384   -464   
240    -64    
32     64     
-16    0      
-160   -160   
-128   16     
-112   272    
-160   112    
0      -544   
-32    224    
-288   -48    
-928   -560   
112    -464   
96     16     
80     480    
-144   -224   
-576   -160   
128    432    
-432   -48    
-32    -16    
-48    112    
-16    96     
-544   576    
256    -384   
-176   192    
112    -192   
-48    -64    
240    -160   
256    288    
128    944    
-432   -176   
544    -912   
32     1088   
32     496    
-192   128    
-512   -368   
-16    -176   
-1488  128    
0      80     
-128   -304   
-16    -368   
16     -192   
48     640    
-64    304    
-80    192    
-64    -208   
-16    -32    
224    48     
-304   -32    
-32    16     
-48    160    
144    160    
-288   176    
128    96     
-176   112    
96     112    
48     -48    
-96    16     
272    272    
-96    224    
272    400    
-224   144    
-48    80     
-80    304    
128    224    
-144   0      
128    176    
-256   16     
-128   -128   
-320   -128   
240    224    
16     -176   
16     208    
192    176    
-96    64     
-96    -80    
-96    -112   
-96    -48    
-80    64     
-112   0      
48     48     
16     416    
-96    176    
-112   16     
-480   -32    
128    112    
-800   32     
-96    32     
96     -16    
48     -80    
48     80     
128    32     
-80    -208   
208    64     
-64    -80    
-48    -256   
-32    -80    
-112   -128   
32     32     
-144   32     
32     160    
-336   192    
-224   -464   
192    -32    
-176   64     
144    64     
32     272    
96     176    
-144   288    
80     16     
-96    32     
336    304    
-112   96     
-112   -32    
-16    16     
192    16     
-816   -80    
-48    80     
64     -48    
-16    -64    
96     80     
32     80     
16     80     
-80    32     
16     -32    
-16    32     
96     80     
-112   -112   
48     48     
-128   -48    
-80    32     
-80    32     
112    64     
32     176    
0      32     
-112   -32    
48     32     
-48    -16    
32     32     
368    288    
-304   -16    
176    112    
-96    -16    
64     192    
0      48     
-128   64     
208    224    
64     -32    
-240   -64    
192    -128   
112    -96    
-16    48     
160    336    
80     112    
-80    96     
-192   -32    
48     128    
-144   -16    
160    128    
-192   -128   
32     -16    
-16    -192   
0      64     
0      64     
0      112    
16     96     
48     96     
-176   32     
256    0      
-144   -176   
-80    32     
48     208    
-208   -16    
144    128    
-32    176    
-80    128    
48     96     
-160   64     
128    32     
-80    64     
-48    -176   
96     256    
-16    32     
0      80     
112    64     
16     80     
144    400    
-80    -64    
-32    -32    
272    48     
-272   112    
-160   -144   
192    112    
48     144    
64     48     
-32    32     
-32    96     
176    96     
128    128    
64     96     
-48    16     
-192   112    
-128   -96    
32     112    
-16    64     
48     -128   
-128   224    
192    288    
-288   64     
176    -80    
-112   160    
-32    -64    
-16    144    
-16    64     
112    48     
-160   32     
192    160    
-192   -160   
256    -240   
16     176    
160    304    
96     16     
-80    48     
80     32     
-16    -96    
80     144    
192    240    
-336   240    
176    -32    
-48    112    
272    -192   
80     176    
96     48     
48     32     
112    96     
304    -992   
-256   192    
-112   -32    
80     80     
96     32     
-160   -112   
-16    16     
176    256    
-256   144    
80     64     
240    224    
-192   144    
48     32     
112    -176   
64     128    
0      -688   
176    -80    
656    912    
-512   384    
32     144    
0      -48    
176    32     
240    -80    
-144   -240   
224    112    
112    96     
80     176    
64     144    
-32    32     
176    240    
-16    -112   
0      0      
-32    -336   
208    112    
320    192    
-112   -48    
80     528    
-160   192    
-16    -176   
80     -128   
-176   -176   
240    -176   
-64    304    
-112   -672   
96     464    
-80    -304   
-16    144    
400    -304   
-272   -48    
128    -1680  
80     336    
64     192    
416    912    
-528   -384   
-48    160    
64     -304   
0      144    
208    480    
-320   -176   
352    48     
-128   -176   
0      80     
-64    -144   
352    112    
-128   -16    
16     64     
80     0      
32     96     
16     0      
288    256    
-16    384    
96     192    
64     -48    
32     -192   
144    32     
-112   -288   
80     -32    
-80    -192   
96     384    
160    224    
-80    352    
128    224    
-16    -128   
-16    -96    
112    -128   
0      16     
64     -160   
-32    16     
16     -128   
48     176    
96     48     
0      112    
16     -64    
-64    -224   
96     -864   
16     160    
64     80     
144    96     
-64    96     
16     -48    
128    80     
-192   -368   
-320   -768   
64     -560   
-16    -256   
64     -160   
32     176    
48     -240   
-16    -32    
304    -16    
-32    -1072  
96     16     
16     -160   
144    16     
-848   32     
192    -208   
-64    -32    
128    -272   
16     32     
96     -880   
-16    -160   
0      -112   
48     -256   
96     -576   
208    128    
192    -16    
224    256    
-80    -384   
144    -48    
-224   272    
176    -96    
288    288    
32     336    
16     -16    
160    -752   
-80    16     
336    304    
32     160    
160    16     
-48    -64    
432    224    
-192   368    
96     112    
224    352    
-368   80     
80     -112   
176    32     
-32    -400   
-16    272    
320    -208   
192    240    
-336   -1408  
496    -464   
256    288    
-64    352    
-64    -192   
208    176    
-128   432    
112    32     
-512   -96    
0      -112   
-1728  -64    
32     -208   
224    -224   
-128   112    
112    160    
64     96     
-128   -80    
128    -992   
224    176    
-96    144    
160    272    
-48    256    
288    256    
-304   -128   
144    -160   
-80    0      
-32    -128   
-496   -448   
112    -576   
416    -160   
-48    -272   
336    -208   
-64    -1280  
128    48     
112    176    
48     48     
32     320    
144    192    
16     144    
-144   160    
-256   -144   
0      -320   
-640   -192   
176    -208   
-320   -32    
128    -144   
80     128    
-48    -688   
160    128    
256    176    
0      288    
224    512    
-160   416    
-32    128    
224    -32    
-32    -48    
336    128    
-608   64     
112    -64    
-80    96     
368    160    
-480   240    
80     -304   
32     128    
112    32     
-16    -80    
-288   0      
96     32     
-128   -32    
-32    -64    
16     16     
-96    -16    
16     80     
176    64     
0      -16    
96     -64    
-160   32     
160    -352   
160    96     
-64    128    
-32    64     
0      -80    
-16    -160   
-160   16     
-48    -32    
-128   0      
32     16     
32     80     
-64    -96    
-64    32     
320    -144   
-224   112    
160    -224   
-496   48     
32     32     
-352   32     
-48    64     
-32    112    
-176   -112   
64     32     
32     0      
-64    -80    
-192   -32    
-848   -48    
-208   112    
-544   -32    
80     112    
-128   -32    
-144   -96    
-176   0      
48     112    
-336   -16    
-800   48     
80     80     
-304   32     
176    288    
-176   -144   
96     -64    
-528   16     
256    0      
-80    -64    
192    128    
-16    0      
-192   -32    
192    16     
-176   208    
-272   -64    
-96    64     
128    112    
-1488  -64    
-64    16     
208    -64    
-240   48     
48     -64    
-32    48     
48     -32    
32     64     
0      48     
-32    0      
-16    0      
-64    96     
64     96     
-144   80     
96     48     
-384   -32    
48     80     
96     48     
-64    96     
-272   -64    
432    64     
-144   -48    
-272   112    
96     64     
-256   -64    
224    64     
-192   48     
-32    0      
-368   272    
304    80     
-416   -256   
112    64     
-288   64     
-224   144    
-64    -32    
208    128    
-96    32     
-16    48     
80     48     
-192   -160   
48     -208   
-256   -192   
-16    64     
-144   16     
-32    128    
16     0      
-144   -64    
-464   -288   
16     112    
-96    -32    
48     64     
176    192    
-48    -16    
32     80     
160    48     
-176   0      
288    192    
16     160    
-32    224    
64     48     
-240   -96    
112    112    
16     -16    
32     -16    
-192   48     
80     112    
48     176    
-16    -80    
112    96     
-176   -32    
-80    -240   
144    96     
0      64     
0      0      
-96    96     
-144   -96    
32     48     
-48    -16    
224    176    
-752   -32    
-304   -176   
16     -16    
80     64     
-16    80     
-80    0      
-272   -400   
96     -144   
48     112    
-176   -32    
-64    -16    
-224   32     
144    48     
-304   32     
144    112    
-400   -112   
48     48     
-224   -48    
272    -80    
112    128    
64     96     
-144   32     
192    224    
32     80     
160    736    
80     272    
-176   -144   
96     -96    
-64    208    
224    224    
-64    112    
-48    256    
-64    48     
-80    112    
64     128    
-112   96     
-48    48     
0      32     
-112   96     
128    96     
-32    32     
-48    192    
144    256    
-224   -48    
64     80     
128    80     
-160   -192   
-48    -48    
144    48     
32     144    
-208   160    
96     176    
32     528    
256    528    
-32    288    
256    336    
-416   0      
96     -16    
0      176    
-80    -240   
16     16     
64     160    
-16    32     
128    16     
-32    -48    
80     64     
96     -384   
144    80     
-32    512    
-32    112    
160    336    
16     -432   
176    416    
-192   -352   
48     -272   
352    624    
-256   272    
16     0      
112    80     
64     176    
-128   -96    
80     48     
-48    0      
0      48     
16     128    
112    224    
-128   176    
288    -64    
-256   96     
128    -80    
-64    32     
144    -64    
48     48     
240    144    
-368   -32    
160    80     
144    80     
-96    16     
16     16     
32     80     
208    96     
-272   -144   
160    80     
32     64     
48     64     
224    128    
-192   176    
160    112    
-288   -128   
272    144    
-16    32     
-80    -272   
32     -208   
32     16     
48     96     
64     0      
-80    64     
16     64     
144    32     
336    -352   
-96    352    
112    208    
64     112    
16     -16    
176    80     
-32    64     
80     80     
16     64     
16     80     
128    80     
48     96     
0      64     
16     64     
112    0      
-64    -960   
-64    -48    
240    64     
144    400    
-64    272    
-144   -192   
0      176    
96     112    
48     -624   
0      0      
32     48     
80     96     
32     -16    
80     -352   
16     -80    
16     -176   
240    32     
-80    -1552  
128    112    
-48    64     
160    112    
-96    -224   
48     16     
-16    -256   
240    560    
144    272    
-80    -32    
240    48     
-112   -32    
16     -192   
64     32     
208    336    
-192   -320   
288    496    
32     976    
-128   -192   
80     736    
192    -336   
-144   160    
16     32     
256    176    
-128   160    
-112   -288   
240    160    
48     224    
80     -160   
96     240    
-64    -1520  
16     320    
-112   -976   
96     224    
-16    416    
-96    288    
80     64     
-160   48     
128    192    
256    176    
64     128    
80     -128   
-64    -464   
-112   -496   
208    -48    
0      -160   
160    144    
-144   -64    
464    736    
144    384    
-144   48     
-16    32     
208    112    
-80    64     
-128   -48    
144    -96    
384    -304   
-48    240    
64     -112   
-16    -16    
272    -16    
-32    96     
-32    -160   
16     -64    
-32    112    
16     80     
-288   -32    
784    320    
-144   64     
240    -432   
96     240    
-32    -320   
64     160    
160    -176   
112    224    
64     -112   
80     192    
160    -32    
-304   224    
224    80     
-16    -928   
0      80     
-272   0      
160    -688   
16     -48    
-96    -192   
128    -192   
32     80     
208    160    
48     96     
-64    -256   
16     -144   
-16    16     
-64    -400   
-80    -192   
224    -112   
-144   64     
-64    -96    
256    -784   
64     32     
0      -464   
48     -192   
256    -720   
64     48     
-16    96     
-112   48     
160    -464   
32     32     
16     0      
-128   96     
0      -64    
144    -64    
-480   -64    
-64    -80    
16     -16    
-32    -80    
64     -64    
176    112    
-32    -128   
-32    -64    
80     -80    
-32    -64    
-80    64     
176    -80    
-144   -16    
64     192    
-144   -128   
-16    32     
48     64     
-304   -48    
64     -48    
32     -64    
288    -112   
-144   48     
304    32     
-240   -128   
208    -448   
-80    -32    
304    -192   
112    304    
-192   -16    
48     0      
-32    64     
112    -160   
-272   16     
144    -96    
-304   -96    
512    -160   
160    144    
-48    -480   
-96    -96    
64     -496   
112    64     
128    -16    
96     144    
-16    -176   
-144   -80    
80     176    
-16    -80    
-256   32     
208    -48    
-368   -96    
240    64     
-352   32     
-32    -272   
32     96     
0      -784   
112    80     
128    -32    
144    48     
-208   -80    
0      -272   
32     80     
-256   144    
-64    16     
192    32     
-608   -80    
0      -96    
112    -128   
48     -128   
160    48     
112    -48    
16     144    
48     176    
192    -176   
-176   -48    
-16    -96    
192    -32    
32     48     
-96    32     
96     -144   
-544   -128   
224    -96    
144    48     
32     -112   
-112   -304   
48     -464   
224    208    
-512   -16    
240    48     
-16    16     
-272   32     
224    -32    
176    16     
-432   -48    
64     32     
-336   112    
272    16     
-96    80     
112    0      
-256   -16    
256    -400   
-16    -80    
-48    16     
304    0      
-176   176    
-48    -32    
-224   16     
176    48     
-144   32     
32     32     
-128   80     
64     -80    
64     112    
-1536  -240   
0      80     
-752   48     
-496   -80    
208    16     
-1008  48     
-80    96     
208    160    
-368   224    
-80    -64    
32     48     
96     144    
-64    -80    
-432   -320   
128    -64    
-48    -240   
128    288    
-304   144    
-304   128    
-144   -160   
-16    128    
-368   -800   
-752   -432   
272    -16    
-1184  48     
48     96     
176    48     
-432   48     
-272   -112   
-16    240    
-128   -128   
-16    144    
176    176    
256    288    
-240   48     
112    128    
-128   -80    
-224   -208   
32     -16    
-128   240    
-96    160    
-224   48     
-368   -576   
-160   -368   
176    -32    
-144   -272   
-112   -128   
-224   -32    
48     -256   
-80    -368   
176    -480   
-240   -112   
80     16     
-32    -128   
-544   -128   
48     240    
-1072  128    
112    240    
-288   -336   
528    144    
-48    112    
16     -176   
80     528    
144    32     
-96    32     
-32    -16    
-64    128    
-224   304    
-160   16     
-112   448    
-128   -48    
-416   368    
-48    -32    
-224   -240   
48     304    
-160   -608   
240    -80    
-160   208    
48     48     
-80    32     
112    80     
-16    80     
-64    48     
48     48     
-80    32     
-32    32     
-192   -208   
80     64     
-176   -16    
-16    -32    
-96    -272   
272    368    
32     288    
-160   32     
48     176    
32     208    
16     176    
32     96     
-96    -48    
-32    -352   
-80    -176   
-48    -112   
16     352    
-448   80     
-176   208    
112    160    
-240   -288   
-64    -144   
-144   -256   
-112   -288   
176    -672   
-64    64     
16     -48    
-96    -176   
16     0      
48     64     
-272   32     
240    96     
-64    -32    
0      0      
-192   96     
176    48     
-64    48     
32     64     
32     64     
208    144    
-144   -208   
-96    16     
448    416    
-288   192    
80     176    
112    48     
-48    320    
304    208    
-176   320    
128    96     
48     352    
-48    0      
-144   -528   
-32    96     
-16    -240   
-48    -160   
16     32     
80     128    
-48    192    
0      192    
-256   0      
176    80     
-80    32     
-112   -144   
160    96     
-64    144    
-64    -96    
-80    80     
-16    -64    
-416   -432   
144    -528   
176    64     
144    448    
-112   400    
-240   -400   
192    -720   
32     896    
208    416    
-96    -144   
80     0      
0      -32    
-64    -64    
144    144    
160    64     
48     -32    
-64    128    
80     -288   
-16    256    
-128   -256   
128    48     
64     256    
-32    128    
32     16     
-128   176    
176    -224   
0      64     
80     272    
-16    -16    
240    192    
-112   192    
128    32     
-352   -240   
528    96     
-160   352    
144    256    
144    464    
64     144    
48     -112   
-16    -32    
-80    0      
48     112    
-112   32     
32     80     
-224   -256   
160    160    
112    160    
-304   0      
48     -48    
-16    -112   
256    176    
32     224    
48     144    
32     -240   
-192   256    
304    240    
-432   -64    
160    -80    
112    0      
-176   80     
80     -16    
-96    48     
160    160    
-64    144    
-400   192    
128    -32    
176    160    
-112   -1056  
96     0      
112    64     
0      64     
80     80     
96     208    
-144   96     
0      208    
192    80     
-96    64     
-80    80     
48     80     
-32    0      
0      -336   
-48    -112   
-32    -640   
288    320    
-128   288    
-144   240    
-16    160    
16     64     
112    336    
-128   64     
-16    -352   
-16    96     
-352   -272   
352    192    
160    256    
32     -32    
112    208    
0      -304   
0      256    
-64    80     
112    128    
128    80     
112    144    
-80    -192   
192    -96    
-96    -16    
144    144    
-144   -32    
128    96     
-144   -96    
144    -80    
-16    144    
-64    96     
32     48     
-48    -304   
96     64     
-32    64     
144    64     
80     48     
176    32     
16     32     
272    208    
160    32     
128    -48    
192    208    
-192   -160   
96     112    
144    -128   
64     144    
160    -240   
-16    32     
16     -352   
176    128    
-48    -80    
-16    128    
224    16     
32     192    
32     -48    
-16    -112   
208    224    
64     -80    
-144   112    
304    -80    
272    16     
-192   -256   
48     144    
96     -288   
-64    80     
0      64     
160    144    
96     -160   
-160   64     
464    496    
-576   -64    
272    80     
16     32     
96     48     
32     -288   
-80    64     
32     -416   
16     208    
48     -704   
128    -32    
16     224    
0      144    
32     0      
64     0      
192    224    
96     16     
-80    -96    
128    32     
96     -16    
-272   -384   
224    176    
64     -32    
80     64     
48     -1168  
48     80     
-16    256    
208    256    
-48    128    
64     -224   
96     -1024  
144    48     
144    -48    
0      -64    
144    16     
32     32     
176    208    
-96    32     
16     16     
96     -672   
80     -688   
160    64     
32     -224   
128    96     
-256   -32    
16     -480   
128    -96    
96     -592   
-96    64     
32     -192   
96     -64    
144    80     
-48    0      
48     32     
16     48     
-48    -160   
80     160    
80     -16    
-48    -128   
-1296  -160   
16     -96    
192    -64    
-112   32     
112    -48    
-16    -144   
-144   -144   
128    -2832  
336    -48    
-256   -48    
48     96     
-32    -16    
96     256    
352    -32    
-320   32     
-256   -32    
192    -272   
-320   -400   
112    112    
96     32     
-224   -384   
272    -128   
-192   -400   
-16    16     
32     -16    
128    112    
144    -96    
0      64     
64     80     
48     -160   
160    32     
160    256    
160    144    
48     -32    
32     144    
160    -240   
-16    -336   
16     -480   
112    -48    
-112   -352   
-64    -160   
0      -224   
-320   -688   
48     -416   
-112   -256   
-64    -112   
96     -128   
-480   -32    
160    64     
16     -160   
-16    32     
112    320    
-16    -256   
64     64     
-32    -1552  
0      288    
-288   -624   
208    -240   
-32    368    
-144   -528   
-240   -464   
432    336    
-160   32     
16     -288   
-192   256    
80     160    
-112   -144   
288    96     
-432   304    
352    -368   
-176   368    
144    -256   
80     0      
64     112    
176    -128   
-16    16     
-288   -160   
-192   160    
-112   96     
-784   -464   
288    -368   
-336   240    
0      -32    
-128   -288   
0      -192   
0      400    
-160   -384   
16     -448   
-16    96     
128    368    
-240   48     
176    -656   
16     -144   
32     208    
-272   -160   
176    -304   
0      416    
48     -416   
-160   -208   
-64    -736   
240    -176   
-112   272    
-144   0      
48     112    
-16    32     
-96    -96    
144    160    
-240   -288   
240    32     
32     32     
-64    16     
192    48     
-16    -64    
160    96     
-736   192    
96     304    
-176   96     
176    -128   
-192   -352   
-64    -144   
48     240    
32     112    
-112   48     
32     128    
112    160    
-80    112    
128    128    
-80    -32    
320    528    
-64    96     
-384   -224   
48     -112   
-160   -80    
64     -240   
-1088  -352   
144    -96    
-192   112    
48     320    
-112   -144   
16     -400   
-384   176    
32     384    
0      -224   
224    64     
-224   64     
-80    80     
240    16     
-80    -64    
-112   0      
-96    96     
16     64     
-368   32     
-16    32     
176    -32    
176    80     
-208   16     
0      -96    
-128   -80    
-128   -496   
80     -64    
-160   768    
-16    -752   
-96    80     
96     816    
-144   -336   
96     80     
-208   112    
-32    -336   
144    -80    
224    112    
-192   160    
176    -64    
-16    32     
-240   -240   
80     -288   
160    64     
32     272    
-64    112    
0      -272   
0      416    
-320   -144   
-736   -272   
-112   128    
-576   -272   
192    96     
-48    80     
-80    528    
-80    -144   
-128   -96    
272    208    
-208   336    
-48    336    
-16    -112   
176    112    
-112   16     
-64    144    
-32    32     
-16    32     
-48    192    
-192   112    
64     -144   
-32    96     
80     96     
-112   -48    
0      112    
48     160    
-80    336    
352    352    
-240   112    
16     64     
16     96     
80     -48    
96     96     
-336   -48    
0      128    
-1008  -16    
-240   -96    
416    32     
-272   192    
48     64     
80     32     
16     32     
112    64     
32     112    
32     160    
-48    160    
-96    -80    
160    112    
-176   0      
-208   96     
-176   0      
-304   80     
192    32     
-96    96     
32     -240   
-128   -128   
96     176    
-112   -160   
320    112    
-272   32     
64     -112   
0      64     
48     48     
-128   -32    
192    208    
-112   32     
128    112    
176    48     
-288   -16    
528    176    
-256   16     
160    64     
176    128    
-96    -16    
-208   -64    
240    176    
-112   -96    
272    -64    
128    160    
192    304    
64     288    
-272   176    
48     192    
-288   -32    
224    112    
16     -96    
-176   176    
144    160    
32     128    
16     32     
80     -16    
-160   -176   
208    16     
-112   -192   
208    -96    
144    144    
112    96     
176    -80    
224    112    
16     -48    
0      160    
-96    112    
-96    208    
16     208    
-96    144    
-16    128    
-16    128    
48     80     
-48    240    
-48    32     
336    112    
-112   16     
-48    32     
-176   48     
-16    -80    
48     96     
-48    96     
-128   16     
48     112    
-48    32     
16     -48    
-128   -96    
112    80     
-32    128    
-192   96     
48     320    
48     -144   
96     48     
112    112    
64     32     
-80    32     
112    80     
32     48     
128    80     
-256   0      
176    224    
-208   48     
32     64     
240    192    
-224   96     
-48    -64    
-80    112    
176    96     
80     128    
-32    128    
96     0      
-176   -16    
288    192    
-160   48     
64     96     
80     128    
32     16     
48     -112   
0      -32    
0      16     
128    16     
128    -96    
-48    64     
96     144    
-16    144    
0      -48    
-16    80     
64     48     
16     160    
96     320    
80     80     
-176   -144   
160    -704   
80     128    
-64    -816   
64     80     
-96    -128   
32     32     
-112   -128   
80     80     
240    144    
-176   160    
-16    112    
-64    144    
64     -192   
16     192    
-16    64     
-256   -672   
144    -32    
272    96     
16     32     
0      144    
-16    -32    
16     176    
80     32     
-16    96     
48     64     
-48    176    
304    208    
80     64     
-96    -16    
80     192    
128    -128   
-48    160    
128    32     
80     -400   
16     -704   
-64    32     
176    144    
-48    160    
-80    192    
144    288    
144    272    
-48    320    
80     80     
-160   -176   
208    96     
-48    -32    
48     -64    
-64    -352   
64     112    
-192   -800   
352    192    
64     496    
0      208    
16     -240   
64     -176   
16     -112   
224    288    
-176   272    
112    64     
16     -144   
-144   -656   
192    576    
-96    -288   
176    560    
-48    272    
-80    -272   
-192   -48    
-224   -240   
-48    -560   
32     496    
-64    80     
32     144    
-16    112    
-16    -80    
32     -304   
112    -32    
-32    -256   
16     -544   
352    208    
-272   336    
160    -272   
-16    -304   
96     -32    
96     32     
-80    -320   
368    -128   
-80    336    
96     -544   
0      352    
224    -384   
224    336    
-80    224    
160    -352   
32     304    
112    -240   
-48    176    
-192   -112   
240    -112   
-224   -144   
-16    -112   
-176   -368   
240    -208   
-32    336    
400    144    
144    320    
144    208    
48     304    
80     192    
-112   -160   
144    320    
64     -160   
16     -608   
64     -1344  
160    64     
64     -1488  
96     32     
-768   144    
-112   -128   
96     -144   
144    -512   
64     -144   
-32    560    
224    -192   
-304   -384   
112    -352   
352    -624   
-240   400    
176    336    
-64    -512   
112    -912   
64     256    
-800   -448   
224    -592   
-160   -112   
192    -880   
-112   -240   
48     -960   
-128   176    
-32    192    
32     -80    
0      -480   
160    80     
48     -160   
32     -144   
336    0      
256    80     
-768   -64    
0      -528   
448    224    
-112   560    
-16    -224   
384    -304   
16     336    
-16    -624   
288    -400   
16     0      
304    48     
64     -48    
16     128    
-16    -128   
16     -64    
48     -16    
352    224    
-816   -16    
16     192    
304    -160   
-160   -592   
576    -176   
-64    864    
-48    -32    
64     -592   
288    912    
-224   -112   
-48    -192   
-16    -512   
-80    32     
352    96     
-480   -656   
-496   -288   
208    -128   
-144   176    
240    -192   
80     -64    
-16    -32    
208    368    
112    -1600  
-48    -96    
32     -240   
192    -128   
-176   160    
64     32     
-64    -16    
96     80     
-464   -352   
-32    32     
-2432  -144   
-32    0      
-64    -32    
32     -16    
96     112    
48     -480   
-16    80     
288    -16    
-400   -400   
128    -208   
80     -32    
-128   -400   
176    -80    
0      -352   
-48    -288   
-64    -32    
-48    -304   
80     -288   
-16    -528   
-48    48     
-16    -896   
-80    -112   
112    -272   
-80    64     
-96    -96    
-48    32     
-112   -64    
16     -160   
-32    -128   
32     -80    
-144   0      
-64    112    
80     32     
80     -176   
16     96     
32     -400   
80     -32    
-192   -48    
176    0      
-192   -160   
-112   16     
112    16     
-288   32     
112    128    
-80    -16    
-112   -96    
80     -160   
-48    16     
-32    -32    
176    128    
144    -128   
80     -32    
-48    240    
352    48     
-256   -16    
224    32     
-112   64     
32     -16    
-208   -160   
576    -48    
-64    80     
224    208    
-48    0      
-544   -32    
96     64     
-672   -432   
-544   -256   
-208   -32    
-32    16     
16     112    
-1488  -64    
-96    -32    
80     -48    
48     48     
192    48     
-144   128    
-176   -64    
32     48     
-208   -384   
144    144    
-96    64     
-208   -32    
192    0      
-304   32     
288    96     
-272   -16    
-32    0      
480    144    
-336   208    
48     144    
-208   48     
-16    -144   
96     -32    
-64    -112   
288    96     
0      176    
288    208    
-208   80     
-288   32     
-272   -80    
-320   -208   
-240   -480   
-240   -512   
-176   -160   
208    -192   
-96    0      
80     -160   
-160   208    
192    464    
-160   320    
-32    -80    
-208   -176   
32     64     
48     160    
0      -16    
96     0      
-32    -64    
-336   256    
-80    400    
-608   0      
112    48     
-128   -256   
-64    -304   
16     -48    
0      48     
64     64     
-176   64     
128    16     
16     -16    
-32    112    
64     -176   
400    144    
48     80     
-32    64     
-400   0      
112    64     
80     0      
-96    192    
144    128    
-208   -32    
-16    0      
-16    -224   
160    208    
32     112    
-160   16     
32     16     
0      -128   
-192   128    
80     128    
-544   64     
32     112    
-240   -80    
128    112    
-128   16     
-16    48     
-48    32     
-176   80     
16     0      
-80    64     
-368   -304   
208    -208   
96     176    
16     16     
-48    128    
-352   -112   
80     32     
-832   0      
-176   80     
-16    192    
112    32     
80     32     
16     -32    
48     48     
48     32     
64     32     
176    112    
-48    -144   
-224   -48    
192    208    
-368   64     
208    144    
-176   64     
48     64     
176    48     
-96    -16    
32     0      
-64    80     
192    240    
-96    112    
0      64     
208    144    
-208   48     
-80    64     
-16    160    
-192   -48    
80     64     
-144   -16    
272    128    
-240   64     
32     80     
48     80     
-64    16     
-16    96     
208    112    
-80    48     
-96    -96    
-16    208    
48     112    
224    304    
-224   224    
-48    -48    
-16    -224   
-48    -128   
80     -64    
-96    32     
64     320    
80     -160   
-96    -112   
16     -16    
-64    144    
-32    128    
112    0      
-112   96     
16     -112   
-96    160    
-80    96     
128    -160   
64     272    
96     528    
-80    -32    
96     352    
-224   -800   
112    368    
-336   -704   
80     -432   
-128   -112   
304    -32    
128    800    
-64    32     
-96    -464   
0      0      
112    224    
128    -96    
16     32     
160    96     
-48    48     
96     64     
64     16     
-128   -256   
160    -64    
-64    112    
160    176    
-112   -80    
96     80     
0      80     
208    112    
-64    -16    
96     -224   
96     32     
-192   320    
256    32     
-64    160    
144    128    
-32    -96    
64     -64    
208    80     
-304   -224   
304    128    
-352   272    
-48    -96    
-48    -16    
64     32     
0      144    
-256   112    
128    208    
304    80     
-96    128    
176    -112   
-256   -336   
-192   192    
48     -144   
-160   80     
160    192    
-16    -400   
144    112    
48     -304   
0      224    
-224   416    
176    48     
-112   -64    
-160   -144   
-176   -288   
160    -16    
-272   -16    
224    -16    
-96    -48    
16     96     
-64    -304   
192    -352   
112    304    
272    -1056  
320    304    
-16    272    
-176   32     
400    16     
-144   112    
144    256    
112    656    
80     -384   
-32    -32    
16     -96    
304    -32    
-96    64     
288    -80    
64     416    
608    16     
-64    80     
0      0      
112    -160   
448    -48    
0      352    
64     -368   
400    144    
-352   -16    
144    128    
128    208    
-272   -480   
-112   -208   
320    -336   
48     400    
176    -320   
240    -16    
-96    320    
112    384    
-16    -368   
192    416    
-80    -304   
240    1376   
-384   -592   
-96    -800   
80     784    
-224   -320   
176    -160   
-80    -224   
288    48     
-16    -240   
-192   -480   
704    0      
-192   320    
128    -1040  
16     64     
16     -112   
192    400    
-144   16     
288    -96    
160    -128   
64     -48    
48     208    
64     -144   
16     48     
144    80     
-16    144    
32     -192   
-240   -32    
176    -1408  
-112   400    
-48    -240   
224    0      
32     576    
32     352    
-144   -32    
128    -192   
-112   -112   
-16    -336   
176    672    
16     160    
48     208    
-48    -304   
-16    -32    
-32    -368   
-32    160    
256    208    
-208   96     
48     -16    
256    432    
-32    272    
80     -368   
-32    96     
128    -16    
-32    32     
208    -128   
-16    0      
80     32     
208    128    
16     -544   
160    400    
112    0      
16     -1328  
48     32     
432    -64    
-96    -864   
96     192    
-16    -336   
-64    16     
272    112    
-80    -128   
224    144    
64     -48    
16     64     
112    -32    
96     -656   
80     -80    
-48    -464   
208    -224   
-368   -64    
160    48     
16     -64    
112    -1520  
0      -208   
112    -2384  
0      0      
48     -32    
16     16     
32     -48    
128    -144   
96     -336   
256    208    
-208   -32    
48     32     
-240   0      
0      0      
-16    16     
112    -208   
112    -80    
160    -96    
16     -112   
80     -48    
128    -352   
64     -128   
96     64     
-64    -32    
208    96     
0      -16    
16     -80    
-256   96     
144    -208   
80     96     
80     64     
16     160    
-48    -144   
-32    -48    
64     -672   
16     112    
112    112    
-16    144    
0      -192   
-96    -48    
-16    -176   
-16    -192   
-480   -144   
-112   -144   
-768   240    
-64    16     
-64    -96    
-64    -128   
32     -80    
144    -672   
208    96     
-32    -144   
-32    160    
288    -16    
-112   80     
-112   16     
80     -96    
-176   -64    
224    -128   
-528   80     
208    -96    
0      32     
96     -144   
80     -32    
128    -96    
-176   -64    
-32    -560   
208    160    
176    112    
-112   -64    
48     32     
96     112    
80     -80    
64     -48    
128    -48    
176    32     
-512   32     
272    256    
-64    -32    
368    208    
-240   336    
-96    -1392  
-112   0      
32     0      
-48    128    
64     -112   
96     16     
-160   -112   
-176   -160   
176    -96    
64     16     
-160   96     
64     -96    
-96    -32    
48     -240   
-144   160    
240    -208   
32     240    
-384   80     
208    64     
-496   0      
176    -80    
-224   -32    
48     -64    
64     -16    
80     176    
0      128    
-208   -112   
112    48     
192    -176   
-16    112    
176    16     
80     -16    
-32    48     
-16    -80    
-176   -48    
128    -80    
48     48     
160    112    
80     192    
-192   32     
-224   16     
80     -224   
48     80     
-144   -48    
-128   -80    
64     -32    
-240   -16    
-160   64     
-528   32     
-48    48     
16     0      
-32    128    
48     32     
-128   0      
32     0      
-336   -128   
-80    112    
-112   288    
-352   -128   
-32    64     
48     -240   
-288   32     
144    272    
-432   224    
96     208    
-32    96     
-208   16     
64     32     
0      16     
-16    -16    
96     32     
-176   -304   
160    48     
-128   -48    
16     -96    
32     160    
-96    -48    
32     32     
-112   -64    
-80    0      
-592   -96    
64     32     
-176   0      
64     -192   
-32    -32    
224    96     
64     1040   
-208   368    
-32    -1200  
176    752    
0      144    
-144   -288   
-48    128    
0      -32    
-64    80     
-224   0      
-64    -16    
-208   16     
-16    80     
128    -160   
0      48     
-48    -176   
608    592    
-576   112    
112    -304   
80     352    
-64    -528   
-208   240    
-48    -64    
16     112    
-32    128    
48     -16    
32     -16    
96     32     
-736   208    
144    16     
-96    -16    
-96    400    
192    -672   
-144   192    
80     256    
-80    -208   
-80    -16    
80     64     
-112   80     
112    80     
-336   -112   
64     -256   
64     464    
-352   80     
96     176    
0      64     
-16    -64    
0      112    
-208   -304   
-112   224    
-176   144    
96     288    
144    480    
-320   304    
48     -80    
-224   0      
-16    -96    
-80    64     
64     16     
-240   -48    
-16    -256   
-64    144    
192    96     
-128   32     
96     32     
-16    80     
-32    80     
-32    96     
-256   -432   
320    -608   
-16    48     
480    240    
-128   272    
-144   80     
16     96     
-416   -16    
-32    160    
-32    -112   
-288   -144   
176    160    
0      -160   
-80    -48    
128    32     
128    224    
-80    240    
288    224    
-192   304    
208    128    
-464   -192   
-48    80     
272    -80    
96     176    
-64    256    
192    -80    
-48    192    
-16    96     
224    224    
224    -48    
-16    16     
-16    -176   
176    -480   
-144   192    
-48    96     
48     -96    
-32    160    
80     16     
176    64     
0      128    
-224   272    
480    144    
-400   48     
64     -48    
-208   80     
-16    -48    
-48    48     
80     192    
-16    304    
-96    -32    
-96    -640   
320    -432   
32     736    
-144   -464   
112    192    
-32    96     
48     176    
96     224    
-64    0      
-80    528    
-48    160    
-80    480    
128    320    
-320   304    
96     -304   
-336   -272   
96     624    
144    192    
-144   -32    
-16    -560   
256    -784   
-80    -608   
272    -224   
0      128    
80     320    
-128   384    
112    96     
16     -96    
-256   208    
48     32     
-32    128    
80     768    
64     656    
-48    208    
-32    32     
-48    16     
224    368    
-272   160    
-64    192    
208    96     
48     144    
-96    0      
96     -32    
16     -16    
16     192    
352    304    
-112   224    
64     128    
16     -160   
64     -224   
320    -208   
208    208    
-80    192    
-16    128    
-64    32     
128    -64    
-160   96     
176    272    
-272   160    
-96    -224   
128    272    
-128   48     
-128   32     
288    48     
-128   80     
96     192    
0      48     
32     80     
240    176    
-160   112    
80     224    
-224   320    
112    80     
64     48     
0      -304   
160    80     
-64    352    
224    128    
-16    80     
-16    16     
32     96     
352    384    
-352   112    
0      32     
160    48     
-48    64     
112    0      
48     144    
32     304    
144    -128   
-128   -80    
384    -320   
-192   64     
160    32     
32     272    
160    160    
-96    192    
208    240    
-96    80     
48     -48    
144    80     
-144   -32    
208    160    
-96    112    
-64    -336   
16     -80    
96     -432   
-112   16     
96     320    
80     48     
-64    32     
224    144    
-64    16     
48     112    
128    64     
16     32     
-80    16     
64     -32    
128    64     
0      -80    
144    32     
-16    -64    
48     48     
80     -1424  
64     96     
64     -416   
32     80     
48     48     
-16    288    
272    48     
-80    0      
128    64     
96     32     
80     112    
256    -32    
0      0      
-64    -208   
-16    32     
32     -48    
48     -32    
112    -288   
-112   80     
352    -64    
-32    -64    
112    -64    
-144   0      
96     48     
0      0      
96     96     
128    -304   
-16    -80    
112    -592   
48     80     
160    -96    
64     48     
64     -992   
64     144    
-80    80     
16     176    
16     -48    
-32    144    
-32    96     
-16    -256   
144    48     
-96    -240   
96     0      
32     -64    
176    160    
-48    -192   
144    144    
80     -1472  
160    16     
32     128    
144    144    
-16    32     
192    80     
-48    352    
-112   -64    
128    176    
160    80     
0      -48    
-112   96     
176    64     
-208   -128   
96     64     
16     80     
-144   208    
80     96     
0      -288   
-176   64     
272    -240   
-16    -1152  
144    16     
32     -656   
-64    -256   
416    -384   
-48    -128   
48     96     
240    16     
112    -448   
-160   -96    
48     -320   
96     16     
0      -272   
80     -192   
-640   112    
-112   -80    
112    -48    
128    -272   
16     -160   
224    64     
-48    -80    
96     64     
48     48     
-16    -208   
64     0      
64     -304   
64     64     
0      -80    
288    -128   
-208   192    
80     -16    
-192   -128   
128    -112   
192    32     
-144   -96    
48     -160   
48     -944   
96     -128   
64     -96    
-112   80     
160    208    
-272   -80    
0      64     
144    -112   
64     -64    
64     -208   
-944   -128   
208    -64    
-64    -32    
144    -96    
48     144    
64     -16    
-512   -208   
-96    -320   
96     144    
-80    224    
160    384    
-48    -32    
144    -80    
-256   0      
128    128    
-608   144    
256    320    
-96    144    
80     -304   
-160   -80    
336    -368   
-128   144    
96     -448   
-16    192    
192    -384   
48     -96    
-224   208    
-16    -80    
96     -144   
-160   128    
96     272    
-224   -224   
-192   112    
-80    -160   
160    0      
48     -208   
32     192    
32     -240   
-64    160    
256    -160   
-336   -192   
112    -608   
48     -48    
-48    320    
176    288    
-288   -224   
-256   -16    
48     -32    
-48    -48    
64     -16    
80     -144   
32     64     
48     -240   
16     16     
-64    16     
48     96     
-160   48     
304    0      
-496   80     
64     16     
0      64     
-48    128    
-48    -48    
32     48     
128    -16    
48     -256   
-144   -128   
272    -256   
0      304    
-288   -32    
112    80     
80     384    
16     272    
-400   -112   
112    -128   
-16    -32    
0      32     
-32    48     
64     -160   
128    112    
-144   -288   
128    0      
0      -160   
16     -16    
-48    96     
304    -64    
-48    0      
96     352    
-32    -80    
48     -368   
-368   -688   
176    48     
-144   208    
-720   -368   
304    -144   
-1024  -32    
64     96     
-560   -144   
-400   80     
-368   -272   
-560   -384   
-16    -112   
-160   64     
32     -16    
16     144    
16     -48    
-304   0      
80     48     
-272   224    
-112   464    
-272   -160   
48     -272   
0      112    
-208   0      
96     224    
-320   192    
-96    -16    
-176   -16    
144    128    
-2240  -656   
336    -288   
288    816    
-112   256    
128    -352   
0      -128   
208    272    
288    784    
-416   -16    
-208   -576   
-144   464    
240    512    
-640   -336   
0      0      
-288   -160   
-1264  0      
-144   80     
224    240    
-112   -320   
-144   -272   
224    176    
-48    -80    
128    880    
144    80     
-48    -288   
32     32     
96     -64    
-16    -144   
0      192    
256    688    
272    400    
-128   144    
-624   -96    
-16    64     
-176   -256   
64     128    
64     144    
-208   -48    
48     -64    
-16    96     
144    352    
-80    32     
-32    48     
-96    144    
16     48     
-96    -128   
-288   -144   
144    -32    
-352   192    
112    80     
-16    240    
-64    -48    
0      -96    
16     144    
16     48     
-304   -256   
16     -64    
240    192    
-400   -32    
-16    48     
-48    -96    
-384   336    
-384   96     
-96    80     
32     -96    
16     64     
0      64     
-192   112    
-96    0      
80     48     
-144   -256   
96     -96    
-128   32     
160    -112   
-160   48     
-64    -80    
80     160    
-48    80     
64     80     
-400   -160   
-48    80     
-48    32     
16     64     
0      16     
80     -48    
80     64     
32     80     
144    -16    
-128   16     
-32    112    
96     -64    
-96    48     
-256   -32    
32     112    
-224   -64    
-112   160    
-144   -112   
240    -256   
16     176    
0      32     
-144   80     
16     0      
144    64     
-176   48     
128    64     
-80    -64    
-32    -48    
144    128    
16     96     
16     32     
80     64     
64     96     
-64    112    
16     96     
64     0      
-64    16     
32     80     
96     -112   
-96    -192   
128    112    
-160   -336   
0      80     
16     176    
-208   -16    
32     112    
-16    64     
32     32     
176    64     
-336   -256   
320    96     
-16    96     
-112   80     
64     96     
-160   16     
160    208    
-112   0      
-176   176    
128    32     
-192   64     
112    48     
-288   -80    
160    -32    
80     176    
-144   16     
32     80     
0      32     
16     80     
-96    80     
-224   -64    
176    352    
32     32     
-64    80     
256    96     
0      96     
-32    64     
16     0      
16     -128   
128    160    
32     -16    
-32    0      
128    176    
16     64     
-48    80     
128    32     
32     80     
48     128    
-304   -160   
400    -80    
-64    80     
-176   176    
304    16     
96     128    
16     48     
-32    48     
0      96     
160    96     
96     16     
-16    64     
-288   -128   
320    96     
-320   -304   
80     -1280  
64     112    
-176   128    
112    176    
64     32     
112    64     
-272   -16    
352    208    
64     144    
-16    -32    
0      96     
80     144    
-96    -16    
160    48     
-48    -32    
112    -208   
-128   48     
208    272    
96     112    
0      -80    
224    160    
-128   48     
16     64     
64     80     
48     192    
-80    48     
-32    144    
-128   -96    
208    304    
-16    64     
48     -16    
80     144    
32     -1232  
208    192    
-224   112    
80     32     
16     80     
96     96     
-16    48     
64     112    
48     -208   
-32    16     
-32    48     
0      -32    
48     32     
-16    -240   
176    48     
-352   -480   
336    -480   
-16    -224   
160    240    
-64    0      
-48    -64    
304    176    
0      240    
176    288    
-160   112    
112    0      
-64    -160   
192    144    
-352   -960   
64     -240   
384    -48    
-96    176    
-256   -2256  
160    -16    
96     -144   
-288   -160   
176    -48    
144    64     
112    176    
-80    32     
-96    -176   
160    -80    
240    112    
-112   48     
-32    -48    
448    576    
-304   544    
-64    48     
112    176    
96     240    
16     80     
32     320    
256    496    
16     288    
-176   96     
-176   -112   
80     -352   
-256   -592   
-16    -800   
-64    64     
288    -464   
-160   144    
96     -368   
144    0      
192    -32    
96     16     
64     96     
96     160    
48     224    
-144   80     
240    -80    
16     448    
-64    288    
-240   -1312  
-208   -480   
448    272    
16     96     
-240   -32    
256    112    
-32    16     
144    352    
-80    208    
272    512    
-48    288    
-160   -272   
128    272    
128    -64    
16     48     
-208   -384   
160    -144   
-208   -272   
128    -544   
96     -208   
96     176    
48     -384   
0      144    
208    96     
-32    -432   
16     96     
-128   -368   
272    -2192  
-16    -48    
208    -64    
-32    -224   
-144   -288   
240    -656   
-80    16     
32     -272   
48     -784   
144    112    
-16    64     
48     96     
112    -224   
96     0      
-896   -48    
208    -160   
32     -16    
64     -80    
48     -48    
64     32     
512    48     
-272   384    
80     112    
96     -16    
112    384    
-80    -80    
208    -160   
-16    -432   
144    -384   
-304   128    
64     192    
96     240    
80     -192   
-16    -64    
-208   -368   
224    -192   
112    256    
160    128    
0      -32    
-80    16     
112    0      
64     64     
-160   -112   
240    -192   
-64    48     
160    -144   
176    -192   
144    -144   
-80    -144   
176    -144   
-80    64     
368    -640   
-80    320    
-144   -496   
96     -1088  
160    -448   
288    144    
16     240    
144    32     
-272   32     
112    80     
144    128    
-64    -16    
160    288    
192    432    
-80    -48    
0      -880   
0      160    
32     -144   
80     48     
32     -16    
48     -176   
48     -192   
96     448    
-64    -16    
16     -1088  
80     432    
-32    -16    
288    -416   
48     112    
64     -160   
-240   -736   
352    208    
64     832    
144    -176   
0      -144   
256    -48    
-400   -400   
-48    -416   
64     -32    
64     80     
-192   48     
16     -48    
-656   -336   
48     -400   
112    -432   
48     -176   
64     112    
176    32     
208    544    
-160   304    
48     96     
-224   -144   
80     112    
-272   16     
-368   -64    
-48    -16    
-256   -32    
-560   -192   
48     -32    
80     128    
-64    -256   
368    224    
-48    -832   
-240   -224   
272    32     
-80    32     
-48    -32    
-48    80     
208    48     
16     -16    
-160   16     
272    -16    
-576   224    
160    -112   
-288   48     
240    -208   
0      96     
-16    -656   
96     -64    
-176   -224   
-160   160    
48     -272   
-64    48     
-64    96     
-96    -16    
-96    -96    
336    144    
-288   48     
176    -176   
-272   -112   
-1264  -96    
-176   -112   
80     -256   
-144   192    
128    48     
-208   -48    
-32    16     
160    -16    
-16    256    
48     112    
0      48     
144    32     
-96    32     
-944   -112   
80     96     
-272   -32    
192    0      
-64    -48    
-112   -16    
80     96     
-384   -112   
112    112    
-272   16     
32     80     
16     48     
16     80     
0      -32    
-32    32     
-96    -64    
224    256    
-80    16     
32     176    
-80    -64    
-96    16     
16     0      
-32    16     
48     -32    
-496   -176   
96     0      
-752   -64    
48     -32    
-272   -16    
-32    64     
48     -112   
176    16     
-144   -272   
-64    48     
-32    -32    
-320   -48    
192    96     
192    112    
-224   -16    
-48    16     
-80    16     
-336   80     
224    80     
-432   -64    
80     96     
-48    -32    
96     176    
-208   -288   
0      -128   
-32    208    
160    96     
-32    80     
-176   -48    
-16    16     
32     16     
80     80     
-96    64     
160    256    
-336   0      
-224   48     
32     -112   
96     224    
-48    -112   
64     -192   
-96    -192   
384    64     
-176   32     
-96    80     
96     64     
-208   64     
-64    64     
16     -48    
-176   16     
-624   -240   
-80    192    
128    -16    
-192   32     
208    -48    
-96    16     
32     16     
0      80     
16     0      
-64    48     
32     -32    
-80    -112   
80     96     
48     -112   
0      48     
-48    -64    
80     96     
96     16     
-112   32     
48     48     
-16    16     
-112   -16    
-64    48     
-32    96     
192    192    
-64    96     
-32    64     
112    48     
-144   80     
320    224    
-400   48     
208    96     
-1296  -32    
-64    16     
-128   -112   
96     0      
64     64     
-208   -96    
272    -16    
0      32     
-224   96     
-144   -48    
-240   32     
368    96     
0      144    
-144   -112   
112    112    
-48    80     
144    112    
0      0      
-80    32     
304    80     
160    272    
-272   176    
-80    96     
128    -16    
32     0      
96     144    
-48    48     
-32    144    
-192   -80    
256    240    
-144   16     
16     112    
32     48     
176    224    
112    96     
-176   336    
-144   128    
176    -240   
96     32     
-144   -80    
80     144    
64     176    
160    352    
-256   -32    
-48    64     
80     0      
64     -16    
32     112    
-160   48     
80     16     
48     -16    
-272   -416   
96     -848   
-224   -112   
240    16     
144    48     
208    240    
-208   256    
-16    240    
96     288    
-320   208    
-112   48     
96     -80    
-112   -112   
-160   -80    
96     -64    
256    -16    
16     144    
-48    -288   
-320   -496   
112    -16    
128    16     
-112   176    
96     64     
16     32     
320    160    
-288   64     
240    -64    
32     128    
192    -32    
-144   -272   
320    288    
-320   288    
128    -112   
-160   -16    
176    480    
-192   -112   
448    -64    
-32    832    
80     656    
-208   -368   
96     288    
64     416    
-192   -256   
208    16     
-96    112    
320    -48    
16     64     
-224   -96    
-80    -224   
272    80     
-176   -320   
64     -496   
64     224    
0      176    
-64    -64    
0      176    
224    48     
-112   48     
128    48     
128    112    
-224   128    
256    80     
32     16     
-64    -64    
192    176    
-64    64     
-48    -288   
-64    48     
288    -368   
32     528    
32     144    
-16    -144   
-96    160    
240    48     
-96    64     
608    624    
-208   560    
-80    464    
-176   -16    
-16    -224   
192    -160   
176    128    
-96    128    
-64    -752   
0      -176   
32     -16    
64     128    
0      128    
224    256    
144    464    
-160   160    
48     -48    
224    304    
16     -144   
-192   48     
288    128    
-32    -320   
64     48     
32     -288   
96     80     
48     -1280  
48     80     
48     64     
80     96     
240    -128   
-400   48     
288    0      
-128   -16    
352    384    
-112   256    
-208   -112   
48     -224   
16     -16    
-32    -160   
96     336    
144    160    
192    320    
-208   -160   
336    80     
-32    160    
16     144    
128    48     
0      64     
-48    32     
-64    -208   
128    -240   
80     -48    
80     -272   
64     -16    
128    272    
256    -320   
-16    560    
176    -544   
-80    160    
-80    -192   
272    48     
-432   -592   
464    432    
384    992    
-416   -128   
112    -288   
80     -64    
-16    -32    
160    -48    
0      176    
16     128    
112    240    
352    592    
-256   -144   
-128   -304   
304    256    
0      32     
176    48     
64     144    
176    144    
-32    -48    
-16    -400   
128    16     
48     64     
272    352    
-240   -112   
144    112    
-16    -416   
64     224    
-176   96     
32     -16    
16     -32    
-144   -48    
-32    -160   
0      -272   
48     32     
64     -64    
0      32     
160    -144   
96     224    
96     0      
0      96     
-112   -400   
96     -240   
-48    -16    
32     -496   
48     -64    
208    -96    
-32    -160   
0      -64    
160    -368   
0      64     
32     160    
16     -272   
224    144    
0      16     
16     -336   
-80    48     
128    -720   
128    64     
32     -208   
-64    -224   
-1056  -48    
128    112    
80     48     
32     -48    
112    -32    
-80    -960   
176    64     
208    368    
-224   -96    
208    -16    
320    176    
112    -16    
192    80     
-176   -112   
96     -160   
-512   -64    
224    64     
-16    0      
64     144    
64     -64    
160    -1056  
-144   -192   
96     -992   
96     160    
-160   -112   
-112   -192   
240    -144   
80     64     
-160   -64    
-64    112    
-64    -64    
208    -160   
-64    -176   
384    0      
128    -80    
64     -112   
384    112    
-224   -48    
-80    16     
176    -32    
48     80     
-144   -192   
384    -16    
-112   96     
48     0      
-288   -144   
288    -96    
-752   -96    
80     -112   
160    160    
48     80     
-336   48     
80     -352   
224    160    
144    0      
0      -16    
224    32     
128    48     
48     48     
224    128    
-496   -16    
160    -48    
32     -16    
192    -16    
-1024  -48    
112    -128   
176    -256   
-128   -320   
96     128    
-16    -160   
112    80     
-16    -48    
-16    80     
-32    16     
-80    64     
-160   48     
32     -16    
-16    -48    
-48    -16    
-368   -368   
128    -256   
16     96     
240    -192   
-96    144    
112    -176   
48     0      
80     0      
-16    -64    
-480   0      
160    240    
48     16     
-112   32     
-96    80     
176    -16    
-256   -64    
0      -96    
32     -48    
64     -64    
192    -64    
-208   -304   
176    -32    
-272   -80    
0      0      
-80    80     
208    0      
-544   -32    
96     -176   
-224   16     
208    32     
-144   -96    
32     96     
-16    128    
96     -272   
16     32     
-224   -272   
-16    -32    
16     -48    
-80    48     
-48    64     
112    128    
-304   32     
-32    48     
-16    32     
144    -16    
-96    48     
-32    -128   
-64    48     
-448   -80    
176    176    
32     112    
64     48     
48     80     
-240   -64    
16     48     
-912   -64    
-32    64     
128    -64    
-16    16     
0      -144   
16     48     
-304   -176   
48     80     
-96    -80    
80     0      
-32    -80    
128    -48    
-176   -288   
0      16     
-128   80     
-336   0      
192    96     
-864   32     
-32    800    
-128   64     
-240   -176   
-32    -240   
-224   -208   
144    -144   
-64    128    
128    80     
-128   -48    
64     160    
-64    32     
-80    -112   
-144   -192   
-32    240    
0      288    
-320   -224   
176    -64    
-192   -96    
-112   80     
96     160    
-288   -144   
0      -64    
48     -48    
-128   -16    
-64    80     
96     208    
-128   288    
-144   80     
112    992    
-304   -176   
160    -496   
-16    576    
192    288    
80     -448   
128    0      
16     272    
-144   176    
160    288    
-96    -80    
0      128    
-80    64     
-64    48     
-176   -48    
48     352    
-256   0      
-32    -288   
-928   96     
0      -32    
16     -112   
-32    208    
64     80     
-112   -336   
-144   -80    
288    528    
-544   144    
112    -336   
-208   -80    
320    352    
-144   64     
-128   -32    
160    224    
-368   -128   
224    240    
-416   -176   
16     -32    
176    32     
-128   -208   
-176   160    
-112   -112   
272    -192   
48     256    
800    720    
0      912    
192    448    
-320   -144   
32     -256   
560    -80    
-144   816    
-1040  -512   
432    -48    
-96    416    
48     -208   
-80    -96    
112    -240   
224    0      
160    736    
-240   96     
-176   -560   
64     -96    
48     -16    
160    336    
-80    144    
48     400    
144    -256   
-192   -288   
336    304    
-192   -192   
-128   -256   
16     -160   
304    384    
0      288    
80     64     
-80    96     
272    48     
-192   -32    
160    176    
368    32     
-272   64     
208    112    
-96    -48    
48     -16    
-16    -80    
32     48     
-64    96     
240    288    
-320   -448   
64     -304   
176    448    
-32    416    
160    176    
-64    112    
-176   -80    
0      -16    
160    160    
160    64     
-176   -320   
64     -384   
-64    208    
-64    128    
96     16     
0      240    
112    -64    
-80    240    
32     512    
144    288    
-640   -400   
-192   -992   
-64    -416   
-48    -192   
-80    320    
400    160    
32     128    
-224   48     
16     64     
96     64     
-32    96     
48     64     
-64    16     
32     96     
-144   -16    
48     96     
16     192    
288    0      
-320   -160   
160    112    
-144   320    
-48    -80    
-16    -32    
192    128    
0      224    
-32    32     
96     464    
0      -192   
-48    -16    
-16    -128   
224    -32    
80     352    
0      16     
112    -64    
224    320    
-16    224    
32     -288   
32     -160   
64     64     
64     -48    
-112   -32    
208    512    
-64    288    
80     176    
32     -144   
-16    -736   
112    -144   
-144   0      
-128   -80    
224    -32    
-16    400    
160    112    
-128   144    
96     -16    
-112   160    
-16    64     
16     192    
-80    -48    
336    96     
-176   528    
144    -32    
128    96     
0      32     
32     80     
80     80     
-16    64     
-80    80     
304    112    
-208   16     
80     176    
96     176    
-128   176    
-48    16     
-64    48     
64     64     
-32    -48    
-32    0      
16     -832   
-64    128    
176    -48    
192    0      
-112   112    
176    32     
-96    64     
176    80     
-144   -384   
112    32     
-224   -16    
80     112    
48     64     
-240   -32    
192    -32    
-16    -1440  
160    160    
-16    0      
16     -96    
288    48     
-48    48     
192    80     
-80    64     
32     -32    
-48    48     
96     32     
-32    48     
16     128    
16     48     
-32    64     
192    -96    
-208   128    
240    48     
-160   -16    
-304   64     
368    96     
-320   0      
112    16     
-144   -112   
160    -32    
16     128    
96     -48    
160    112    
-112   -272   
-160   0      
48     48     
96     48     
256    0      
64     192    
240    -1632  
128    -64    
144    -32    
192    48     
64     96     
-96    64     
96     -16    
128    -64    
64     80     
-128   -272   
368    144    
240    -160   
-96    48     
176    -208   
192    240    
16     -64    
-208   0      
160    -48    
80     64     
16     -16    
128    80     
256    96     
-208   -80    
64     64     
288    256    
-128   144    
80     -368   
48     80     
224    -16    
-160   -16    
224    112    
208    16     
304    304    
-400   48     
80     32     
144    -16    
-16    112    
-48    -64    
48     16     
176    -48    
16     176    
-64    -176   
-16    -112   
160    64     
144    128    
48     -1280  
80     -144   
-16    128    
336    -1392  
-304   320    
112    96     
-32    -912   
-48    -176   
256    64     
-144   -176   
240    96     
32     0      
144    96     
240    96     
-144   -272   
288    112    
-96    -1168  
160    -160   
272    -208   
144    -112   
-32    0      
32     -640   
64     -112   
32     -1168  
96     64     
48     -1232  
0      -16    
32     -96    
-64    -256   
96     -272   
32     128    
64     -160   
32     96     
-144   -16    
112    -176   
-336   160    
-96    272    
80     -48    
-48    -544   
240    0      
32     -144   
-16    -112   
-80    -816   
64     48     
192    32     
-192   -128   
64     16     
128    144    
-64    80     
0      -48    
-304   -64    
96     -96    
-64    -112   
112    -192   
0      -144   
0      -112   
48     0      
64     -656   
192    112    
560    576    
-320   720    
-96    160    
0      192    
-32    -160   
128    -128   
-96    -48    
16     -112   
-1072  -144   
-32    -208   
80     -48    
48     -176   
-112   80     
144    -144   
112    112    
240    336    
-144   256    
192    160    
64     0      
176    -368   
-16    -240   
32     32     
96     -272   
-416   -64    
16     -496   
-176   -112   
32     128    
-80    -16    
48     -880   
-80    -432   
240    -2464  
-176   -32    
272    112    
48     -64    
-96    -48    
-32    480    
-128   -144   
176    208    
-944   -144   
192    -128   
-704   -64    
192    -64    
176    128    
-16    -240   
-32    288    
432    -48    
-144   208    
-16    -112   
-16    16     
48     128    
-96    -192   
-304   -144   
160    -464   
48     -112   
144    -320   
-176   224    
160    224    
224    608    
-496   -304   
64     -288   
-144   -560   
80     96     
48     496    
-384   64     
-240   -496   
544    160    
-48    336    
96     -112   
-32    -32    
16     -32    
-288   -128   
-16    -432   
256    -224   
112    32     
0      160    
-240   -16    
464    -320   
-96    144    
-160   320    
304    -208   
-16    224    
-48    144    
240    96     
-224   96     
176    176    
-496   176    
112    -192   
32     64     
-1744  -416   
-128   -144   
0      -128   
-240   256    
48     176    
-304   64     
48     16     
-272   -16    
-144   -272   
48     816    
224    224    
-128   -192   
16     -80    
-128   -320   
192    144    
-208   -240   
-256   176    
80     -336   
64     96     
48     128    
-528   -272   
160    336    
-688   48     
480    400    
-80    16     
-144   -208   
160    -528   
272    112    
224    416    
-336   128    
112    -544   
464    352    
-240   176    
336    -320   
-320   560    
224    -112   
-288   -320   
656    624    
-736   -144   
-336   -944   
224    352    
-352   272    
-368   -848   
224    -464   
-32    800    
256    -64    
-208   -160   
256    -48    
-480   0      
448    64     
-352   16     
112    -32    
64     -32    
-304   16     
-176   -272   
-208   368    
-256   -288   
-112   272    
240    32     
-224   -96    
64     32     
48     -304   
-336   -176   
-64    -48    
16     64     
-128   64     
-160   160    
-80    -384   
-144   112    
-192   48     
-64    128    
96     -80    
48     96     
160    192    
-560   -768   
128    -336   
48     416    
-80    -400   
144    224    
96     96     
-48    -240   
112    -192   
-112   -400   
256    256    
0      80     
-48    64     
16     32     
0      96     
0      -16    
-64    80     
160    48     
-304   -224   
368    0      
-144   0      
160    208    
-160   80     
208    256    
-32    304    
272    496    
-192   80     
112    48     
-480   -224   
0      -144   
-464   0      
48     144    
80     144    
-304   -480   
144    -160   
96     64     
-144   48     
-64    -32    
112    80     
-16    112    
32     96     
-272   -64    
48     112    
-464   -32    
112    112    
32     32     
-48    112    
-112   -176   
-64    -48    
160    128    
-208   112    
48     64     
80     48     
16     0      
128    144    
-32    64     
-128   -48    
160    80     
-176   16     
64     48     
96     160    
144    -64    
-272   128    
256    -160   
-80    80     
272    288    
-128   288    
-112   96     
-16    96     
-192   32     
64     160    
-320   64     
128    0      
-176   -112   
0      -48    
-32    32     
16     16     
0      -48    
-48    80     
32     128    
80     64     
-208   80     
16     64     
208    192    
-288   48     
112    -32    
208    64     
-80    64     
-32    -112   
144    240    
176    144    
-48    128    
144    128    
-32    -96    
176    48     
176    64     
64     160    
16     128    
272    352    
-112   192    
-224   240    
0      -96    
-16    208    
96     96     
-144   304    
48     80     
-32    -16    
64     208    
48     96     
-128   16     
0      -16    
208    144    
-48    0      
-144   -144   
-272   -224   
256    -80    
-176   -176   
192    -32    
16     -144   
80     -48    
32     -16    
-144   -144   
32     -224   
384    272    
-176   304    
32     448    
16     320    
-208   64     
-176   32     
-336   64     
432    768    
-240   480    
192    128    
-144   240    
-368   144    
160    160    
-208   -16    
144    192    
112    64     
176    128    
-192   64     
176    -32    
-16    144    
256    176    
-112   48     
208    64     
-96    -128   
-32    -272   
240    112    
-256   128    
64     112    
-288   32     
352    240    
128    192    
-96    240    
-240   32     
16     80     
0      64     
-80    -160   
80     32     
256    288    
-224   160    
48     -192   
160    0      
32     -1392  
32     96     
80     144    
-112   80     
112    80     
0      16     
96     48     
-32    -16    
-112   -160   
96     80     
-112   32     
-64    80     
-32    16     
112    -32    
256    176    
-160   -464   
0      80     
48     112    
80     48     
-32    32     
48     64     
80     0      
128    80     
32     96     
96     160    
-32    -32    
-48    48     
160    320    
-32    16     
-128   16     
128    -64    
48     80     
32     -1008  
96     -16    
48     -304   
16     -112   
64     -32    
48     176    
16     48     
64     464    
-32    240    
240    400    
-176   160    
128    -400   
64     16     
144    -400   
32     64     
176    -704   
48     128    
48     64     
0      112    
-32    48     
-16    144    
192    0      
208    256    
192    176    
-224   0      
304    -176   
-288   -560   
176    400    
16     -64    
128    208    
-32    -240   
144    64     
-48    -48    
32     -144   
0      336    
128    -96    
-48    -128   
208    400    
0      -32    
192    -160   
-320   -96    
192    -256   
48     80     
32     144    
-160   -160   
288    -272   
-144   144    
0      -32    
128    48     
176    160    
-144   144    
112    -96    
16     192    
96     304    
-160   -560   
-48    -912   
128    -704   
64     800    
32     112    
-80    -304   
80     -48    
96     96     
0      -480   
32     128    
192    256    
64     -656   
-64    -96    
32     -112   
128    32     
16     16     
96     224    
64     -64    
-160   -144   
80     -496   
256    48     
160    80     
112    160    
0      48     
272    -560   
16     144    
-272   -1072  
48     -608   
96     -112   
304    112    
192    704    
-112   -320   
464    -48    
144    -32    
-64    -80    
-192   -256   
80     -400   
-80    -272   
144    16     
-128   -16    
240    352    
224    304    
224    160    
-464   144    
-240   -496   
112    -144   
416    128    
-112   80     
-144   -272   
144    -192   
64     16     
320    288    
256    400    
-32    64     
224    16     
-352   -144   
96     144    
-272   -128   
-720   -112   
272    -208   
-32    304    
192    368    
-32    16     
-224   -176   
240    -304   
-128   -96    
320    -336   
-160   -16    
304    384    
48     208    
64     416    
-48    16     
-176   -528   
-16    -48    
-16    -48    
192    -112   
384    272    
0      16     
240    -208   
-224   64     
-48    -1680  
192    672    
240    -16    
-128   240    
-16    -272   
336    128    
-240   -224   
464    -176   
-160   496    
192    -16    
-416   304    
64     -384   
176    -304   
160    -48    
-16    400    
0      16     
160    112    
-96    -1104  
256    336    
-240   80     
336    -672   
-144   224    
-32    -144   
32     -32    
-32    -96    
-160   -176   
160    -224   
-192   -160   
-16    48     
-208   -128   
240    -528   
-32    -80    
32     -448   
128    32     
-32    -48    
48     48     
-160   112    
-64    144    
-96    -80    
160    112    
-160   32     
112    112    
-32    224    
128    272    
432    544    
-288   224    
96     176    
96     -1008  
176    192    
-320   -112   
-48    -16    
-48    -64    
-32    336    
-256   0      
16     -112   
48     16     
-112   -416   
-288   112    
256    -96    
-32    32     
128    -432   
240    32     
16     -304   
64     32     
-128   16     
176    0      
-208   128    
80     400    
80     304    
16     448    
64     -160   
-160   -144   
-384   -144   
48     -48    
0      208    
32     -80    
48     112    
-640   -80    
-1984  48     
272    32     
0      -32    
144    16     
0      64     
-16    160    
16     -96    
-80    0      
96     -112   
48     176    
-560   64     
208    192    
-224   -272   
192    144    
64     0      
-192   -192   
64     80     
128    176    
-288   256    
-464   80     
-48    0      
-128   -208   
16     -32    
208    -16    
-160   16     
160    -208   
48     48     
32     -112   
-160   160    
48     16     
-48    0      
-48    48     
-64    96     
-96    -32    
96     32     
-16    96     
-576   32     
16     64     
80     48     
-80    96     
-144   -64    
-128   -48    
64     -80    
-32    80     
16     96     
-112   0      
32     112    
-96    16     
0      176    
-128   96     
-160   -16    
-32    -64    
-48    32     
-64    -192   
32     112    
-144   -144   
128    -96    
-64    -304   
-144   -48    
48     288    
-64    304    
-80    -64    
96     -96    
16     -64    
-80    0      
-144   64     
-48    -80    
-80    -16    
-656   -64    
-128   48     
352    -32    
0      128    
16     32     
112    32     
-32    32     
0      0      
-48    144    
112    64     
-80    16     
192    192    
-288   -32    
-112   -16    
208    16     
-240   80     
176    240    
-48    80     
128    144    
-160   144    
16     -32    
-64    48     
-288   -208   
560    112    
-224   80     
80     -112   
-96    -48    
96     96     
-16    -16    
-48    128    
-32    64     
-128   96     
96     160    
-512   -16    
128    160    
48     144    
16     16     
32     16     
64     48     
-16    -64    
-16    48     
-80    0      
-80    48     
-80    96     
144    64     
-224   -80    
64     96     
-336   -80    
48     288    
176    160    
-32    32     
560    608    
-688   -96    
144    176    
96     128    
48     -16    
48     32     
192    128    
-128   -96    
336    144    
-448   0      
240    -16    
192    80     
192    112    
144    96     
-240   -128   
160    -48    
32     192    
-32    96     
80     128    
16     16     
0      144    
32     112    
-256   -64    
224    48     
-112   32     
96     96     
256    256    
-400   112    
-16    -32    
-112   0      
96     -80    
112    64     
-96    64     
-64    32     
-48    0      
-144   96     
208    272    
-336   96     
-192   -48    
-112   -16    
16     80     
-128   -64    
112    -16    
400    336    
-304   176    
160    112    
160    160    
-48    176    
-32    -32    
176    80     
-16    -16    
-80    0      
160    160    
64     176    
-176   -64    
-48    32     
112    144    
-48    96     
-64    -512   
-144   -464   
48     -464   
-128   -32    
96     400    
-64    272    
128    -128   
16     144    
-208   -336   
240    64     
-32    624    
16     96     
128    -48    
-16    32     
96     704    
-160   -288   
144    48     
-96    80     
-16    32     
-48    64     
-80    48     
352    128    
-208   16     
160    64     
-128   16     
48     -352   
32     144    
304    192    
-320   336    
128    -288   
160    128    
-256   -528   
336    -64    
-64    640    
32     -96    
-32    96     
-80    192    
-80    -272   
80     -128   
-96    -64    
80     16     
-64    -288   
-64    -64    
144    -96    
-96    96     
224    16     
-80    192    
32     64     
224    -176   
96     288    
128    96     
-32    192    
48     -256   
-112   -160   
-48    -240   
48     -416   
368    400    
-224   416    
48     32     
176    80     
512    528    
112    1184   
-160   640    
144    352    
288    704    
-32    304    
0      -32    
80     -144   
-32    16     
16     0      
-96    -304   
80     48     
-160   -1088  
256    112    
64     80     
96     48     
192    192    
-16    64     
-288   48     
224    176    
-208   -384   
192    -176   
-64    192    
144    64     
32     -64    
192    -160   
160    32     
48     128    
96     240    
-368   -768   
896    -544   
-48    704    
464    544    
288    192    
224    608    
-64    112    
0      160    
-96    -48    
-272   -352   
-112   -272   
-144   -368   
624    496    
-288   -160   
32     -112   
336    -1088  
-144   192    
32     -256   
224    128    
-80    864    
352    -112   
-544   -1248  
96     -368   
16     624    
-144   -80    
-32    0      
-64    32     
112    -64    
240    -320   
-80    -32    
-128   -960   
-128   -944   
320    -1184  
80     752    
0      320    
160    64     
16     480    
304    -352   
384    784    
48     336    
0      432    
160    -304   
-192   -688   
384    144    
32     528    
96     48     
-80    -112   
128    -288   
-32    352    
-96    608    
400    224    
-448   -256   
-48    -272   
64     112    
32     -208   
160    336    
-80    128    
-240   112    
320    0      
-80    112    
272    -240   
-176   -112   
48     -912   
-32    112    
-16    96     
176    -16    
-64    -320   
96     -496   
128    -96    
80     -144   
32     112    
48     -96    
-64    -16    
64     -112   
48     112    
144    -224   
-80    16     
48     -160   
112    192    
208    144    
-32    -336   
64     -1056  
80     48     
-48    -1568  
32     -96    
144    -1552  
-48    -256   
144    32     
352    176    
-32    256    
96     512    
288    -16    
-96    -64    
208    -160   
80     -48    
192    -208   
-112   -240   
240    32     
-32    32     
32     64     
0      -576   
-144   -160   
144    -1792  
80     -48    
-64    16     
48     -112   
96     -624   
-96    -32    
128    -320   
0      64     
-176   -96    
224    -16    
-320   0      
48     -32    
80     -48    
-32    0      
96     0      
160    192    
-96    -64    
0      352    
128    -48    
-16    -144   
-32    160    
-96    -160   
224    144    
0      144    
80     -176   
-192   -176   
144    -224   
48     160    
128    -112   
-32    0      
160    -64    
-96    -64    
80     -1296  
-48    64     
192    64     
-32    0      
48     112    
208    -48    
-64    -128   
0      -80    
-128   -64    
-16    -64    
-176   32     
64     -64    
-16    32     
224    -240   
240    -16    
-48    -256   
192    192    
176    -64    
-128   48     
192    -48    
48     -48    
-176   0      
-16    -112   
-32    48     
240    16     
-160   -16    
16     0      
-640   208    
176    16     
-128   -16    
-16    -272   
192    80     
32     -512   
48     80     
-16    64     
336    48     
-352   96     
144    -80    
-208   96     
176    -192   
-16    80     
16     -176   
-240   32     
160    -80    
192    112    
144    -224   
-208   96     
272    -608   
-96    80     
-160   -16    
80     -112   
-80    144    
-64    -192   
-96    -208   
-48    -192   
-128   -160   
96     -96    
-336   -112   
112    -32    
128    96     
-64    -160   
-80    48     
-32    -336   
224    48     
-240   128    
448    -32    
-368   -208   
256    -16    
-32    16     
-32    -32    
-64    -48    
16     80     
-208   -48    
128    -144   
-64    0      
64     -176   
48     80     
64     48     
64     -48    
-64    32     
64     16     
64     176    
16     0      
0      -48    
496    448    
-448   48     
80     -224   
-112   112    
96     -192   
-96    32     
96     0      
16     80     
-112   -32    
-1136  -80    
-112   32     
-1824  -96    
96     0      
96     208    
-32    48     
-160   -144   
128    128    
48     96     
-16    48     
-304   -112   
128    -32    
-80    -48    
48     96     
-32    32     
64     -16    
-32    48     
-96    0      
-16    -64    
-720   96     
80     -160   
-48    -192   
144    224    
-288   -32    
-48    16     
96     64     
176    208    
-464   -144   
80     160    
-304   -64    
80     64     
0      32     
-544   80     
224    -16    
-256   48     
-176   144    
-1120  32     
256    -48    
32     -80    
80     112    
128    -64    
32     -96    
-48    -208   
48     -48    
112    16     
-80    48     
64     48     
-192   -176   
-96    80     
96     32     
-240   112    
-256   32     
-96    80     
-112   -112   
-48    16     
96     96     
0      208    
64     320    
80     16     
-64    240    
-64    -384   
-192   -256   
160    0      
-80    112    
-32    208    
64     144    
-64    32     
192    -336   
-752   80     
0      224    
256    240    
-32    16     
160    512    
-240   -160   
96     -48    
-16    32     
-32    144    
224    80     
-208   96     
176    0      
-208   -96    
32     128    
0      32     
-240   128    
96     64     
16     112    
-64    -96    
-16    208    
-144   -192   
80     -16    
-112   96     
-16    -16    
0      -96    
-112   -32    
-80    -16    
-80    32     
32     16     
-48    80     
-480   -32    
80     48     
-1200  -144   
48     32     
-32    96     
48     48     
16     48     
16     96     
240    176    
-272   160    
16     -16    
128    -160   
-112   -224   
80     96     
32     128    
-176   -16    
32     240    
32     144    
-64    -64    
32     16     
-48    48     
-112   -48    
-32    32     
0      32     
32     208    
96     160    
-128   16     
208    96     
-176   16     
-32    208    
-320   0      
48     48     
112    96     
112    -16    
-16    -16    
-112   -16    
16     32     
64     112    
-176   16     
80     64     
-64    64     
352    432    
-272   976    
-208   208    
336    64     
160    352    
48     256    
32     16     
144    96     
16     16     
48     80     
80     -32    
-64    112    
-16    48     
48     80     
-64    16     
144    48     
-16    64     
64     80     
16     112    
-160   128    
96     -400   
-144   -544   
16     32     
160    176    
16     176    
208    224    
-112   -80    
16     48     
16     160    
64     -160   
560    720    
-112   1344   
80     -704   
288    -144   
48     352    
48     -144   
144    160    
-96    176    
-160   48     
336    112    
-304   -208   
-96    -240   
-16    96     
224    144    
-32    -224   
272    224    
-64    272    
-160   -240   
272    48     
112    336    
160    320    
16     368    
64     288    
16     112    
64     240    
0      80     
16     16     
-48    -112   
0      80     
0      -96    
368    592    
-112   624    
64     -48    
-16    -816   
48     64     
48     -112   
-336   -176   
16     -240   
-80    16     
-192   -272   
112    48     
-48    -32    
464    32     
-256   96     
176    -16    
-160   0      
160    80     
-336   48     
672    80     
-352   240    
176    352    
-416   -144   
64     -32    
288    128    
-112   80     
-272   -144   
288    -48    
-48    176    
-32    -160   
-240   -16    
528    -16    
0      272    
304    128    
-64    -432   
160    96     
-32    -1680  
80     48     
0      80     
0      -64    
64     48     
48     80     
64     176    
352    144    
-272   -112   
112    80     
64     48     
80     -64    
80     112    
192    -224   
-96    16     
256    16     
-272   64     
96     80     
-32    64     
0      64     
144    160    
-208   -16    
224    144    
-16    64     
-32    -48    
16     -176   
0      -80    
128    80     
0      -128   
256    160    
-128   -336   
-16    256    
-112   -112   
208    32     
160    144    
96     64     
176    16     
80     256    
-160   -32    
0      128    
64     16     
0      -128   
176    256    
128    -112   
-16    96     
176    -400   
112    48     
16     -1456  
-48    64     
16     32     
48     96     
96     160    
176    144    
-112   16     
144    128    
16     80     
0      -48    
80     80     
-176   -176   
16     -32    
48     -16    
144    112    
-128   -352   
48     96     
0      48     
-128   128    
96     0      
144    80     
48     -16    
-144   192    
288    16     
-160   -112   
240    112    
-80    -272   
176    -16    
-48    -96    
240    96     
-16    -64    
64     160    
112    16     
-48    224    
144    -16    
80     112    
64     -80    
-112   -192   
240    160    
-48    -224   
144    144    
0      -288   
64     144    
192    -80    
-64    160    
-80    -128   
96     176    
80     -272   
16     144    
64     0      
176    128    
-16    32     
32     -128   
160    -928   
32     64     
16     128    
-96    -208   
176    80     
-16    144    
32     144    
0      -208   
160    48     
-64    64     
176    224    
112    16     
-64    -320   
144    -112   
32     -160   
80     -208   
32     16     
16     -848   
-96    -64    
64     192    
80     -96    
176    192    
-80    -160   
256    -48    
-48    128    
-80    -624   
112    32     
64     -400   
144    -96    
-1136  80     
112    80     
-16    32     
-48    96     
416    48     
-208   -1216  
176    0      
0      80     
96     16     
48     -64    
-112   224    
96     -96    
-96    96     
128    -16    
-128   16     
-112   32     
-96    -208   
160    -16    
-16    -224   
64     64     
-80    -160   
144    80     
32     -1648  
-16    -32    
224    80     
-208   64     
80     -48    
112    -16    
16     0      
-80    -144   
-160   -64    
-64    -32    
-576   -160   
0      -80    
480    384    
-384   144    
-80    -144   
80     -336   
32     96     
-144   16     
96     272    
-288   -304   
368    -32    
-176   -192   
80     -64    
-64    -32    
64     112    
-224   16     
64     -48    
32     -48    
-160   -128   
96     128    
112    -112   
144    160    
-64    -432   
16     48     
32     32     
-336   112    
80     96     
-256   48     
0      32     
-112   208    
16     -144   
160    -16    
-208   432    
-288   336    
-112   288    
240    -144   
256    16     
-112   -1072  
416    -144   
-176   -80    
160    -96    
32     976    
16     400    
-224   -80    
48     -400   
-160   -160   
-32    -272   
-736   -224   
16     288    
160    -16    
-144   -80    
-48    176    
-144   -496   
112    112    
-256   64     
128    -144   
288    288    
-224   368    
-144   -224   
80     -48    
32     0      
-32    48     
32     32     
48     -48    
-16    48     
80     -240   
-16    400    
464    -16    
-208   320    
-176   544    
-176   -528   
-192   -800   
144    -272   
48     384    
16     176    
-48    288    
128    -64    
-432   48     
0      -240   
96     16     
-48    -144   
256    272    
-384   80     
-352   -32    
-80    -64    
-880   -80    
-48    0      
0      0      
96     32     
96     80     
-80    224    
-48    -32    
-288   -224   
-112   -304   
160    160    
-400   -80    
144    80     
16     112    
-112   -32    
96     48     
-96    16     
-48    48     
-512   48     
0      64     
64     -48    
-128   -16    
-768   -16    
-192   -256   
-48    -320   
224    112    
16     64     
-128   208    
16     32     
-144   48     
-112   -64    
-64    0      
128    128    
-608   96     
80     96     
-848   -64    
32     32     
192    80     
-48    112    
32     16     
-48    -64    
-96    -176   
-160   -80    
-96    80     
96     64     
0      224    
48     512    
-128   512    
-304   -208   
-240   -160   
-576   -64    
64     48     
112    128    
48     208    
0      256    
880    1024   
-432   880    
144    96     
-272   112    
112    -288   
-80    -176   
80     -96    
-112   80     
-32    0      
48     96     
-256   -16    
-160   112    
-368   -512   
48     -448   
32     320    
32     192    
80     0      
64     -16    
-288   -416   
272    -480   
144    1008   
-32    48     
64     -352   
16     320    
0      64     
-64    -160   
-48    -48    
-992   32     
-128   -16    
-16    -160   
224    -368   
-80    368    
128    608    
-48    -144   
-160   -160   
64     16     
-144   192    
0      400    
-64    -32    
-96    -16    
-240   -112   
-176   32     
96     -304   
64     112    
-96    -16    
80     64     
-144   -16    
64     -32    
-16    -64    
128    -96    
-16    -80    
176    -96    
-48    176    
64     112    
-160   16     
-192   -352   
48     -48    
-32    64     
80     256    
-384   0      
192    -64    
-368   160    
0      16     
-368   -96    
-160   -96    
32     -128   
-240   48     
-16    -128   
-304   -96    
288    128    
-288   176    
192    32     
-448   -144   
256    144    
-96    -64    
-32    32     
-32    -64    
112    96     
-32    80     
48     32     
176    368    
-496   192    
-80    48     
96     32     
16     80     
-160   -32    
-48    32     
32     -336   
-480   224    
224    -256   
-240   128    
112    -16    
-64    -16    
96     80     
-80    -64    
16     64     
96     0      
112    112    
-208   32     
0      96     
-112   16     
-32    -48    
-160   32     
336    80     
-96    96     
160    176    
-304   -16    
32     -32    
240    144    
80     160    
-96    32     
0      80     
160    144    
-368   -128   
176    128    
-16    -32    
128    144    
192    160    
192    96     
-320   -32    
176    0      
0      128    
96     80     
-16    112    
80     48     
128    96     
-208   0      
64     144    
-80    128    
-48    80     
-48    48     
96     -48    
-160   64     
112    48     
-80    32     
112    112    
64     32     
0      112    
144    48     
-96    -240   
0      48     
224    80     
-192   16     
112    128    
-48    48     
96     160    
-160   -96    
32     48     
304    16     
-208   32     
144    -16    
16     96     
64     80     
176    64     
48     0      
-16    32     
-96    80     
80     160    
80     96     
-208   112    
320    -240   
-96    -768   
112    128    
128    96     
-144   80     
192    96     
-128   48     
16     32     
64     288    
48     96     
-224   -176   
256    48     
48     32     
-96    96     
80     32     
192    208    
96     -256   
-16    80     
48     80     
96     112    
-112   48     
16     144    
144    64     
-64    16     
160    96     
-16    96     
-64    -32    
176    80     
-64    -128   
32     64     
16     96     
16     -160   
96     96     
-16    -352   
-32    160    
48     32     
32     80     
64     32     
0      48     
208    0      
16     112    
-32    0      
-96    80     
112    80     
-192   -112   
80     96     
0      -224   
160    144    
-80    -48    
-32    80     
80     112    
96     64     
-16    80     
-16    -64    
192    -128   
-16    128    
160    176    
-272   80     
16     -112   
160    -32    
-128   80     
208    -96    
-16    48     
160    -128   
112    208    
-208   80     
304    144    
-64    -96    
112    112    
336    384    
-224   352    
96     16     
-144   -48    
240    16     
48     144    
208    112    
-208   -16    
224    64     
-256   64     
192    -112   
-64    -352   
176    128    
16     -368   
128    320    
-144   -160   
64     -16    
144    96     
48     112    
16     -208   
32     -432   
160    -32    
192    -272   
80     32     
16     -272   
48     48     
64     -160   
304    416    
-448   -160   
240    96     
-160   384    
-64    192    
-112   32     
-176   -256   
160    -496   
-80    -416   
128    448    
-80    -464   
-64    192    
192    -256   
-128   112    
144    16     
-16    128    
160    48     
16     -16    
112    -48    
-144   -256   
64     0      
48     -48    
0      416    
208    128    
-80    -112   
64     -80    
176    304    
-256   -192   
0      -48    
112    -448   
-80    80     
192    176    
96     -416   
-32    0      
-112   -368   
272    -144   
-32    -32    
272    -1488  
-224   -864   
400    -848   
352    464    
-256   80     
64     -80    
128    -64    
16     -160   
0      288    
-80    -80    
192    -640   
-96    96     
96     -432   
-96    -304   
560    -576   
-352   -912   
80     64     
144    -368   
240    208    
112    -272   
192    -112   
-32    176    
-112   -144   
240    -64    
160    80     
-64    -96    
96     48     
-128   -16    
64     -112   
-496   -16    
208    64     
32     400    
-112   -112   
384    336    
-16    480    
80     128    
-96    -96    
0      -16    
112    16     
32     16     
64     16     
144    144    
-256   -16    
192    336    
-96    96     
-16    -96    
112    -64    
-48    -304   
80     -48    
80     -528   
176    16     
-80    -1024  
-416   -192   
160    -448   
-32    -80    
256    -128   
-48    80     
240    336    
-384   -32    
-64    48     
-144   96     
-1664  -32    
224    0      
16     -16    
80     0      
48     -48    
96     -272   
16     64     
96     16     
272    144    
-48    144    
176    368    
176    528    
160    656    
-32    352    
208    112    
-208   304    
-96    -336   
240    -160   
48     -448   
-256   -128   
128    -816   
-64    48     
208    -1280  
-288   -320   
320    -496   
112    720    
0      320    
-240   -880   
32     416    
48     304    
-432   112    
160    64     
-576   112    
32     -336   
0      224    
0      -80    
-48    -352   
176    -656   
144    368    
112    -192   
128    288    
-112   496    
128    -688   
-96    80     
240    432    
-256   -96    
-96    -272   
16     160    
16     48     
-48    -176   
-16    -336   
112    80     
128    -64    
-160   -912   
-80    -576   
208    -128   
-224   96     
272    -32    
-64    144    
160    96     
-320   544    
288    432    
0      128    
-160   16     
80     48     
-32    -176   
144    48     
48     -208   
48     32     
96     -64    
-16    -64    
48     368    
144    256    
-192   -64    
144    64     
-128   -16    
144    -112   
-16    -64    
-736   -208   
144    144    
-1488  -80    
224    144    
16     -80    
-80    96     
96     160    
-736   64     
-160   48     
256    352    
-240   224    
128    192    
-48    -80    
-224   64     
-320   -32    
-256   -224   
-128   144    
96     -80    
-320   48     
80     80     
-80    16     
-192   80     
64     -32    
-208   64     
-384   -96    
240    -144   
-160   -80    
256    0      
-336   -304   
-96    -240   
-240   -208   
16     16     
-160   -48    
-192   32     
32     96     
-112   -32    
16     48     
0      -64    
-144   -240   
-32    -112   
-176   -128   
-192   -64    
-400   -64    
224    16     
0      112    
160    144    
-64    16     
-224   -144   
-32    80     
-144   64     
-80    -64    
-240   -192   
192    272    
-432   -160   
-128   32     
32     -64    
-80    208    
-32    176    
-48    -96    
384    304    
-144   -128   
96     144    
-128   112    
-272   -48    
0      -160   
-176   -16    
48     112    
-48    -96    
16     96     
-272   -80    
160    48     
16     80     
-192   -96    
-256   -32    
0      96     
-48    -144   
96     64     
32     -32    
80     32     
48     80     
-48    48     
0      48     
-112   64     
0      0      
-160   -80    
-16    128    
-96    -32    
-64    80     
-240   -128   
64     -32    
-160   -192   
64     32     
-64    48     
96     -16    
-32    160    
224    128    
-192   32     
-16    64     
48     0      
32     64     
112    80     
-272   -16    
32     128    
-48    0      
48     96     
-32    64     
-80    -32    
-80    0      
-48    -96    
80     -80    
32     144    
192    208    
-240   0      
288    224    
-336   0      
112    96     
-240   0      
128    64     
0      48     
-144   112    
192    96     
-176   48     
-160   64     
176    -48    
128    160    
-64    96     
-32    -64    
-48    -208   
-32    96     
-64    -32    
80     128    
-176   0      
320    304    
-432   16     
0      144    
48     64     
32     -96    
144    112    
-128   16     
-32    64     
-16    112    
-80    -80    
-96    0      
112    80     
-32    96     
160    128    
-128   -16    
16     128    
-16    -48    
-80    64     
32     32     
-32    -64    
-16    -96    
112    48     
80     128    
-144   16     
-32    0      
160    -64    
160    160    
-80    128    
0      208    
-144   -64    
48     96     
144    64     
-192   176    
16     496    
64     336    
-16    384    
-32    208    
-224   -16    
240    64     
-16    -48    
-80    0      
0      -48    
-240   32     
0      112    
-32    0      
-64    0      
176    208    
0      128    
128    48     
-192   96     
304    400    
0      640    
-160   176    
64     -64    
-80    -16    
-32    0      
112    48     
-64    320    
-112   -544   
-96    288    
96     96     
64     -32    
-32    512    
-32    -368   
-32    -48    
192    48     
48     448    
-16    304    
-112   -112   
96     432    
16     304    
48     -112   
-32    32     
-48    32     
32     -48    
-128   -2192  
-96    -16    
272    144    
-80    48     
-16    672    
-16    -48    
32     -208   
64     144    
48     32     
-48    64     
-16    224    
80     48     
96     192    
32     32     
-112   -240   
48     -992   
-16    208    
64     -16    
-80    128    
176    368    
48     -48    
-32    16     
64     32     
176    816    
-96    -80    
32     -544   
192    160    
-144   -112   
64     128    
-80    -176   
-272   -576   
16     256    
-128   192    
16     112    
-432   -544   
336    1232   
128    896    
-144   -240   
-80    -128   
208    176    
240    288    
-80    432    
224    -240   
-512   -720   
304    -176   
224    160    
-96    -48    
-80    -656   
-64    144    
160    128    
-336   240    
336    -384   
112    336    
80     64     
-48    64     
-144   0      
272    -192   
64     720    
128    0      
256    192    
-112   464    
48     -384   
256    -448   
-368   -528   
96     320    
128    720    
-144   -64    
-80    144    
96     48     
-48    160    
0      16     
-16    48     
128    32     
16     -16    
32     80     
64     16     
16     48     
-32    -48    
176    288    
96     -432   
-48    -176   
-224   -224   
16     -96    
-128   -224   
-32    80     
176    144    
16     368    
-32    112    
32     -144   
160    0      
16     64     
-96    288    
-128   -1424  
160    224    
240    -656   
-144   -64    
128    96     
16     32     
-32    192    
240    48     
-464   -512   
320    -144   
-64    448    
208    96     
176    624    
-112   -560   
-80    -96    
96     -592   
112    -176   
48     96     
176    96     
64     96     
-96    96     
96     96     
-16    96     
112    -80    
48     32     
96     48     
240    48     
-144   -112   
-80    -304   
-144   208    
-96    -544   
32     0      
144    400    
-64    80     
-48    -1296  
192    368    
-32    656    
-32    -528   
48     -1520  
112    144    
80     -2272  
-128   -96    
192    128    
80     -160   
-96    -112   
64     -192   
48     -64    
112    -160   
-96    -1360  
144    352    
128    -256   
-128   112    
96     272    
112    -96    
-48    -160   
-32    -480   
96     0      
48     -416   
-64    640    
128    288    
-240   176    
176    32     
128    -208   
-64    -240   
-16    0      
-48    -144   
32     -80    
-272   -96    
224    -128   
-368   64     
-48    -352   
48     -48    
160    -48    
-48    80     
-32    -896   
176    16     
-64    80     
0      -80    
16     32     
224    144    
-48    -96    
240    -320   
-336   -224   
304    -48    
-304   0      
64     -32    
-32    -32    
-224   -752   
240    -352   
-112   -144   
272    112    
112    -48    
-128   32     
192    -48    
48     80     
0      -144   
32     64     
-144   -80    
96     48     
48     -16    
144    32     
-16    -32    
16     -128   
304    -32    
112    160    
-32    112    
128    -64    
-96    112    
112    -32    
-32    96     
-80    -272   
-32    -48    
144    160    
-96    48     
-336   -64    
80     -192   
-144   48     
96     96     
128    96     
64     16     
-240   -208   
416    -256   
-128   128    
112    48     
32     208    
112    288    
0      -64    
-368   -304   
96     -144   
128    -96    
128    -96    
-240   96     
160    272    
-224   176    
-64    -192   
-64    -128   
160    -480   
16     128    
16     -1408  
240    400    
-352   176    
-48    -192   
-464   0      
48     144    
-176   144    
-48    144    
-240   -192   
48     -240   
-80    -80    
-48    -400   
352    -112   
192    -192   
224    80     
192    -32    
208    -224   
-192   192    
-176   -96    
-80    16     
192    -16    
48     128    
-192   176    
208    96     
-128   0      
-96    -16    
-176   -176   
208    144    
-16    -112   
80     96     
64     -352   
32     -32    
-272   -80    
80     -48    
-48    64     
-48    -144   
-112   -64    
-176   -224   
-160   16     
32     -16    
-224   -160   
0      -16    
160    48     
-608   -96    
80     32     
-48    32     
-336   -80    
-96    -80    
224    0      
0      48     
144    208    
-304   96     
-32    -64    
224    32     
-16    48     
80     48     
-800   -144   
192    208    
-448   -192   
32     80     
112    128    
-144   160    
96     96     
-656   0      
48     128    
-1376  -32    
16     48     
48     80     
96     112    
144    -128   
-288   0      
112    -96    
-96    128    
112    0      
-272   96     
0      -16    
-160   -48    
-240   80     
-128   32     
-48    -32    
-16    16     
144    128    
-2160  -80    
16     0      
-176   -144   
176    112    
-272   -48    
0      496    
48     208    
-320   -64    
32     -32    
32     -48    
-80    -112   
400    240    
-240   352    
-96    272    
0      224    
-368   -64    
-144   256    
-80    144    
0      272    
16     288    
-64    96     
32     192    
-80    -96    
32     -96    
176    160    
-96    448    
0      224    
-96    -176   
-272   -16    
144    -240   
-160   224    
32     320    
320    -80    
48     112    
-112   -160   
128    -240   
112    -112   
-144   -368   
-96    0      
-64    -128   
-112   -240   
-96    32     
-144   128    
16     112    
32     0      
-144   -16    
32     -128   
-1008  208    
-112   -64    
64     -144   
48     112    
-80    64     
-48    64     
32     96     
-128   16     
48     80     
-96    48     
48     288    
-96    -688   
80     544    
-160   112    
-32    96     
-304   -192   
112    128    
96     544    
-16    64     
48     0      
-128   512    
-128   -64    
-160   -400   
144    272    
16     336    
-80    272    
16     320    
160    64     
-496   -320   
128    -464   
-368   -288   
192    448    
-272   256    
32     -256   
-208   160    
-64    -176   
96     -304   
144    32     
-48    -352   
-176   -32    
368    224    
144    800    
-128   336    
80     -224   
0      -64    
-208   -176   
160    0      
240    64     
-96    -16    
240    -48    
48     128    
272    32     
64     304    
128    -80    
112    -48    
128    144    
160    -48    
160    512    
80     128    
-208   -384   
256    -464   
0      704    
496    720    
-80    240    
48     -96    
-176   64     
160    272    
-224   -80    
-64    -256   
-144   -32    
256    1008   
-464   128    
-80    -672   
400    16     
-48    736    
-96    16     
-80    -32    
32     -48    
432    48     
288    1040   
-176   32     
112    -368   
128    272    
32     -16    
-16    48     
0      -224   
224    0      
96     368    
-16    320    
192    -144   
224    -320   
96     256    
272    224    
-80    208    
272    -112   
-240   512    
272    -208   
-96    272    
224    96     
-144   176    
-32    48     
32     -80    
-48    240    
80     -192   
112    736    
-176   176    
32     352    
240    -64    
-176   32     
-128   32     
32     144    
-176   -256   
-32    -48    
0      240    
32     -80    
16     512    
-16    -16    
-144   -112   
48     160    
-48    -1280  
128    32     
192    256    
-256   -112   
192    -32    
-48    224    
272    400    
-96    384    
-160   -304   
-112   -496   
160    336    
48     336    
-64    64     
176    64     
-208   -448   
16     -2688  
112    432    
-64    -48    
-32    -240   
112    192    
48     192    
288    432    
-304   -208   
96     48     
240    16     
-176   -128   
80     48     
-48    -64    
-176   48     
256    48     
-160   -400   
-16    176    
-112   32     
64     48     
-64    16     
128    80     
32     -64    
32     -128   
-16    112    
32     -80    
96     -16    
96     -48    
48     -48    
-944   -240   
176    48     
48     -432   
96     80     
64     432    
64     128    
-32    -48    
144    -32    
48     160    
96     16     
144    192    
80     224    
-112   64     
48     96     
80     80     
160    64     
-176   96     
48     96     
144    48     
0      -976   
64     48     
-64    144    
48     32     
208    -32    
32     -16    
-16    16     
96     -32    
80     -144   
-64    32     
144    112    
-16    -16    
-112   0      
48     -176   
0      64     
112    -240   
-80    64     
272    -272   
-288   64     
192    16     
-48    80     
-32    16     
112    112    
-64    64     
32     80     
-176   -176   
-96    -496   
0      32     
160    112    
16     48     
-64    -192   
128    96     
-144   -432   
144    96     
-304   -480   
336    32     
-32    272    
208    -16    
-64    -48    
192    48     
64     240    
-32    -160   
32     32     
240    -528   
-208   -128   
272    -160   
-64    352    
64     -592   
96     144    
-112   -32    
288    80     
-304   -240   
160    64     
-128   -112   
112    -544   
-96    160    
-128   -176   
352    96     
128    112    
-48    64     
32     -96    
192    32     
112    -32    
128    48     
-16    -96    
128    224    
-16    0      
160    -144   
-128   -192   
112    112    
304    288    
-128   96     
128    176    
192    -128   
80     192    
48     0      
64     80     
96     -32    
64     192    
80     -16    
-80    -224   
-64    16     
-32    -160   
96     -304   
-48    192    
256    -224   
-128   -80    
208    -1376  
48     -176   
112    64     
16     -80    
160    -48    
-64    128    
192    -192   
-496   128    
352    -48    
-368   -112   
416    48     
48     -400   
-96    -16    
-16    -592   
48     -64    
128    -192   
-112   -80    
-32    -224   
256    -48    
0      80     
336    -48    
208    176    
-192   0      
112    96     
112    64     
-80    64     
-336   -128   
-304   -32    
16     -112   
128    -48    
112    -192   
96     -32    
112    -96    
16     -160   
80     -1104  
-48    -160   
48     -16    
-64    -32    
16     -288   
0      32     
-256   -48    
0      -48    
-352   -32    
16     -16    
288    144    
16     -16    
-96    0      
32     -208   
96     96     
-16    96     
64     48     
368    96     
48     176    
-112   -144   
112    -96    
176    224    
-32    -32    
32     96     
80     -160   
-480   80     
240    -128   
-48    144    
224    -160   
-64    -512   
304    -64    
176    416    
32     32     
-64    -160   
64     -80    
-160   -192   
-48    0      
176    16     
-304   -48    
0      -336   
-288   48     
-48    -96    
96     16     
-48    32     
64     32     
-64    -464   
0      32     
32     -816   
32     112    
-16    48     
288    16     
-128   -176   
-16    -176   
-336   -432   
336    288    
-240   128    
32     240    
-448   -336   
32     368    
-48    -224   
144    -96    
96     -48    
-64    -80    
352    -128   
-192   128    
160    -240   
-256   160    
48     160    
-64    -224   
128    48     
-48    160    
80     -192   
-256   32     
160    -16    
-208   80     
176    16     
-48    96     
-80    -160   
128    -48    
-496   -48    
112    -224   
-144   112    
80     144    
-16    -272   
32     208    
-32    432    
-192   -16    
-96    80     
-16    -160   
-64    80     
112    -128   
-64    80     
-128   -96    
-160   -48    
144    48     
16     32     
64     16     
16     64     
-32    0      
16     16     
-48    -16    
-48    -48    
-16    -144   
-672   -64    
352    400    
-1472  96     
96     144    
32     112    
-736   80     
112    -64    
-304   -16    
96     -144   
-544   -400   
240    -560   
96     -96    
128    32     
320    -32    
112    464    
-16    112    
-32    144    
336    -96    
-144   -112   
-288   -224   
496    -80    
0      512    
-240   320    
-80    -112   
-560   -64    
224    0      
-464   -416   
640    -368   
32     -32    
528    448    
-416   -416   
288    592    
-96    224    
144    -16    
-256   32     
-368   -336   
144    0      
-224   304    
-176   -176   
48     112    
0      64     
-656   -48    
-176   -48    
-208   96     
96     -32    
-320   -464   
112    400    
-112   240    
-208   -448   
-48    512    
-80    368    
128    544    
-224   -336   
-160   -96    
-32    192    
-176   -160   
-80    -288   
176    64     
-240   176    
176    48     
-16    -96    
-64    176    
-192   16     
-272   -144   
-96    -32    
16     192    
-32    112    
-80    416    
0      -864   
-368   240    
-80    96     
-224   -208   
-432   -608   
-1296  -96    
0      368    
-128   -48    
-144   -368   
-80    -48    
128    400    
-160   480    
112    112    
-448   -560   
-48    -336   
0      -80    
16     176    
32     -32    
176    64     
32     160    
-240   -48    
64     -208   
80     -272   
-128   -64    
144    -16    
96     -48    
64     -128   
80     176    
32     -80    
-96    -288   
64     -128   
144    -224   
-48    96     
-96    -368   
-144   -208   
112    -80    
-192   32     
112    -64    
144    240    
-32    192    
-96    -192   
-32    0      
16     -48    
-112   -48    
-80    16     
-16    160    
0      160    
-96    144    
-112   112    
-96    80     
-208   64     
-48    -528   
-208   -272   
96     128    
0      32     
-128   96     
128    64     
0      -16    
32     80     
128    256    
0      -64    
-16    32     
224    240    
-400   0      
240    144    
-272   400    
208    272    
32     160    
-96    160    
-48    192    
-128   80     
64     16     
-48    -128   
240    96     
-160   112    
32     48     
-80    288    
112    256    
-448   -384   
528    -64    
-176   128    
-208   48     
160    -112   
256    0      
-32    128    
64     96     
64     64     
0      112    
0      80     
-48    64     
96     48     
-160   64     
160    64     
-192   -48    
128    32     
-64    -16    
96     48     
0      0      
-16    64     
48     80     
-64    32     
-80    0      
80     64     
16     112    
32     16     
0      32     
16     32     
64     32     
-112   -32    
384    304    
-144   -16    
0      112    
272    48     
-144   80     
144    0      
-64    32     
-16    272    
320    64     
-304   -48    
160    -64    
144    -16    
-48    32     
16     368    
96     208    
-80    -48    
-16    96     
16     224    
64     144    
80     176    
-80    -64    
48     -48    
48     -240   
16     48     
0      96     
-144   -16    
32     80     
-16    80     
-144   -32    
192    -144   
16     -544   
-80    80     
-32    64     
-32    16     
128    144    
48     272    
-80    176    
112    176    
-192   48     
144    80     
-112   -16    
32     -112   
16     176    
32     32     
32     128    
160    -224   
0      80     
-32    256    
144    -16    
-64    32     
288    144    
-320   96     
-144   -256   
112    80     
16     144    
32     112    
96     96     
-48    -64    
192    80     
112    112    
80     -304   
128    336    
-336   -688   
64     -64    
-144   128    
80     16     
32     -48    
-256   240    
144    160    
-208   80     
272    64     
-208   176    
-112   -208   
32     -80    
-32    32     
112    -176   
48     128    
128    -1328  
-80    160    
304    48     
-32    96     
0      144    
176    0      
-80    112    
64     64     
16     -16    
0      160    
64     96     
-368   0      
352    112    
-144   -64    
288    48     
64     -320   
80     64     
16     -528   
96     64     
304    96     
-176   192    
-64    -16    
96     16     
176    96     
-16    160    
-64    192    
144    80     
-144   80     
144    -272   
256    288    
-272   -544   
128    96     
224    -400   
64     160    
0      -64    
224    16     
576    432    
-512   304    
48     48     
160    16     
240    208    
272    -144   
-32    -32    
160    -224   
160    96     
64     -96    
96     144    
-32    -368   
160    240    
-32    -1824  
16     48     
-48    -64    
224    48     
288    160    
-96    -96    
96     512    
-224   -128   
48     -272   
64     0      
-128   -176   
320    -192   
-112   432    
-64    -848   
80     672    
-32    -288   
0      160    
384    128    
-224   64     
64     -288   
32     -208   
64     256    
384    704    
-480   -304   
0      -144   
128    -64    
-96    -80    
256    384    
-320   -224   
336    64     
-80    -48    
-32    -208   
-48    48     
336    -1856  
-80    -976   
0      -80    
112    -544   
48     -32    
32     176    
192    -64    
0      336    
48     16     
64     -64    
80     256    
160    -416   
-96    176    
144    -400   
-128   0      
96     80     
112    32     
-48    224    
208    -80    
-48    -160   
32     -512   
160    -240   
-48    64     
80     0      
-48    48     
32     32     
48     32     
80     64     
32     32     
-80    -16    
-96    -256   
80     -640   
208    -176   
48     64     
96     -128   
-48    -80    
64     -64    
112    -272   
-112   -32    
-176   -320   
80     -496   
32     -144   
-384   -112   
64     -256   
96     -96    
-272   -64    
240    -16    
-1536  -48    
32     48     
112    -64    
176    112    
112    48     
208    -336   
-64    -64    
128    -272   
-128   96     
96     -32    
-48    64     
0      -432   
64     -272   
-16    -400   
144    -160   
80     112    
160    16     
-160   128    
160    -128   
112    272    
160    -336   
-528   -64    
592    -512   
-16    496    
240    144    
-128   0      
64     -176   
288    -176   
112    240    
-48    64     
-48    -128   
96     128    
-832   -192   
352    -352   
64     352    
0      -192   
-64    -48    
192    -576   
-176   -672   
-48    224    
480    -416   
-128   416    
-256   -592   
256    -80    
240    -96    
-144   160    
-16    -144   
-496   -464   
48     240    
-416   256    
-240   0      
-80    -256   
0      -96    
336    352    
-320   -1040  
128    -96    
0      64     
160    0      
-208   -64    
192    -160   
16     -192   
128    -128   
-16    -192   
16     -224   
-32    144    
-112   -176   
0      -96    
64     -240   
208    336    
96     -16    
112    208    
-704   -112   
160    448    
-176   32     
-144   32     
-112   -32    
64     -96    
-448   -192   
144    -192   
-304   -224   
96     -592   
128    192    
32     64     
48     352    
144    -64    
0      -32    
-304   80     
0      -64    
-96    16     
64     208    
-96    -192   
144    -304   
-192   -384   
224    -624   
-576   -240   
416    -48    
-64    112    
-800   -112   
208    -96    
-96    96     
-576   0      
-64    32     
-1008  -224   
48     128    
256    96     
-112   64     
64     0      
-64    48     
160    64     
48     112    
-112   -96    
64     192    
32     -176   
96     80     
0      -16    
64     32     
-32    48     
-192   16     
-32    48     
-928   32     
-256   -96    
112    -96    
240    272    
-64    0      
-64    96     
-336   -192   
16     80     
-304   -272   
192    32     
-128   -80    
224    208    
-128   -160   
224    -80    
160    256    
-320   0      
-48    80     
-176   96     
-128   -48    
16     -96    
256    256    
-240   -64    
160    128    
176    192    
-160   80     
-16    80     
-176   -64    
32     -16    
-144   -96    
-112   16     
192    256    
-128   64     
-384   -96    
320    128    
-144   -112   
96     112    
80     -64    
-256   -240   
256    -64    
-128   208    
272    -48    
-448   0      
320    96     
-400   32     
32     48     
96     64     
-288   -48    
32     16     
192    256    
-112   64     
-128   -32    
192    -48    
0      -16    
-48    32     
32     32     
64     96     
112    64     
-144   64     
96     128    
-96    16     
-32    64     
-48    -48    
-80    0      
128    96     
-80    -48    
96     80     
96     -48    
-128   32     
0      32     
192    112    
64     48     
-320   -208   
304    -64    
128    32     
-208   32     
160    144    
-128   64     
96     128    
64     144    
-544   -64    
-288   32     
320    -192   
-240   -32    
-32    80     
208    96     
16     32     
-48    -16    
48     -16    
-144   -64    
48     -32    
0      -336   
-160   -128   
32     -128   
96     144    
-384   -112   
128    96     
-128   48     
160    128    
-112   208    
208    96     
176    144    
-160   -48    
0      -32    
0      112    
112    112    
-224   16     
96     112    
-176   -208   
32     48     
112    128    
-192   112    
16     144    
48     48     
-16    80     
-80    64     
48     16     
-48    64     
160    208    
-240   128    
-48    -32    
48     64     
48     48     
-256   -176   
96     160    
-240   -80    
32     64     
32     96     
32     32     
-128   64     
-16    -32    
64     96     
400    400    
-160   448    
-224   -16    
128    96     
-80    -16    
128    176    
-240   32     
0      96     
144    80     
-32    -48    
224    208    
-144   128    
160    96     
0      96     
64     64     
-16    64     
240    240    
-240   128    
-16    16     
80     64     
48     64     
-48    -96    
32     144    
352    192    
-256   112    
-64    48     
-176   32     
320    112    
-64    256    
128    32     
-112   64     
64     80     
-16    112    
176    144    
144    96     
-16    16     
-192   -112   
192    0      
-16    0      
80     -64    
352    240    
-240   240    
-80    192    
-64    64     
-16    32     
80     48     
-16    48     
-64    16     
80     -144   
32     32     
176    80     
-80    512    
224    240    
-32    48     
-16    -528   
176    -368   
224    -48    
-32    -96    
112    -400   
416    224    
96     112    
-48    64     
48     0      
-80    96     
-16    -96    
-16    -16    
48     272    
64     352    
-144   64     
-96    160    
-16    -480   
-224   256    
192    -304   
64     160    
0      432    
-64    16     
320    32     
-208   -16    
-64    48     
176    -80    
32     288    
80     80     
16     16     
64     176    
48     176    
256    416    
-224   272    
96     368    
192    272    
-80    368    
-80    64     
48     0      
32     -176   
320    80     
-112   32     
-112   -96    
144    96     
16     -144   
48     64     
-160   -976   
208    128    
-96    48     
64     48     
-16    80     
0      32     
368    -48    
-240   192    
464    128    
-112   352    
112    0      
48     -176   
128    32     
128    16     
112    48     
64     -496   
-64    80     
208    -32    
48     96     
-80    -32    
192    256    
0      144    
0      272    
80     96     
16     32     
32     96     
176    -16    
-48    96     
192    -64    
-176   224    
112    -864   
-80    144    
96     -912   
-160   0      
112    0      
144    224    
-240   32     
112    128    
-176   -64    
160    -432   
144    64     
-96    -352   
-112   -240   
48     -96    
48     112    
-32    -352   
64     128    
-80    176    
320    160    
-192   -128   
0      -304   
48     80     
-80    160    
32     16     
16     48     
160    128    
16     -16    
112    288    
-48    -128   
-160   -176   
160    -416   
-112   128    
32     -144   
-16    -96    
128    336    
-32    80     
160    -112   
-48    192    
0      416    
224    -1008  
-336   80     
-64    -1008  
208    592    
-16    -432   
0      368    
48     -528   
304    176    
-128   -16    
-128   -64    
96     -416   
-16    -16    
128    64     
128    256    
208    -16    
-64    -192   
144    112    
192    -160   
80     96     
304    272    
-160   272    
-112   -112   
-32    80     
0      -144   
192    400    
-48    336    
0      -272   
32     96     
16     -592   
160    -992   
-288   -272   
0      -768   
160    80     
16     -560   
48     16     
272    176    
336    400    
-208   80     
16     128    
304    -288   
64     64     
128    -272   
-144   48     
-192   -96    
176    -240   
-48    128    
-96    -176   
144    -16    
256    -32    
-448   -416   
560    384    
-48    272    
-192   -128   
-48    -96    
-16    -224   
-16    96     
-128   -256   
112    112    
-144   -64    
176    -16    
-1904  -176   
96     0      
96     -160   
32     -64    
128    0      
-176   -96    
112    -32    
32     -224   
0      80     
80     -96    
-208   -128   
352    -16    
-240   -32    
-48    0      
64     -80    
16     160    
-128   128    
-192   144    
336    -64    
96     -96    
-80    -432   
-32    -48    
0      -2800  
112    224    
-160   16     
96     16     
64     16     
-160   -240   
-176   -32    
32     -32    
-368   -64    
32     -80    
-1264  32     
-112   -80    
48     -96    
128    -192   
80     -32    
96     -416   
64     32     
16     -112   
208    16     
48     128    
-80    -16    
-32    0      
128    16     
-144   -112   
-48    -160   
-384   192    
32     -64    
-16    128    
304    -64    
-32    16     
80     -160   
144    64     
304    -80    
-176   272    
128    240    
0      64     
80     112    
176    -32    
80     144    
144    -96    
-352   -144   
48     16     
-144   0      
80     48     
-48    16     
64     -240   
64     -528   
-48    -912   
288    16     
-464   -16    
160    64     
160    -16    
0      -64    
-208   96     
112    -32    
-112   48     
-80    80     
-160   -192   
176    -304   
-32    80     
64     -256   
-16    64     
144    -32    
-144   -64    
-176   208    
128    -64    
-528   -368   
272    -80    
-32    32     
-48    64     
48     48     
-32    -32    
-976   48     
-48    -208   
96     112    
144    -176   
48     48     
-64    -112   
224    -64    
-64    16     
160    -16    
-16    64     
0      -112   
-96    80     
192    -32    
-192   -16    
-48    -128   
48     32     
-432   -80    
48     80     
-48    -112   
0      -96    
-48    32     
-576   48     
-64    -16    
-64    80     
-512   176    
0      0      
-368   -80    
48     -48    
-64    -32    
-800   -272   
352    16     
192    80     
-352   -16    
-176   -112   
-240   32     
128    48     
-112   64     
32     128    
-128   -48    
48     -16    
-176   16     
-112   16     
416    288    
-208   192    
-208   -96    
32     96     
-64    -112   
0      16     
-176   -160   
-144   -96    
-32    0      
32     96     
16     -80    
-304   32     
160    144    
-576   -64    
160    96     
-256   128    
-64    64     
208    256    
-352   224    
-208   -352   
144    112    
32     176    
-48    -208   
-80    -144   
96     240    
-208   160    
-368   32     
-224   16     
-176   -32    
64     -96    
-256   144    
-256   -672   
-720   -688   
384    -144   
-48    32     
64     112    
208    288    
-320   32     
64     144    
-80    96     
-80    16     
-64    32     
112    160    
304    304    
-272   0      
-176   -32    
-16    -32    
-80    -208   
64     -48    
64     128    
-96    80     
-144   112    
-464   -640   
-96    -336   
192    48     
-16    -32    
16     -112   
-64    16     
80     -144   
-112   -144   
32     -304   
-96    -304   
-96    144    
64     176    
-96    -224   
-80    32     
112    96     
80     336    
-272   -48    
368    64     
32     16     
16     -176   
64     512    
112    80     
-96    16     
-16    -64    
-16    32     
-208   368    
-16    0      
-80    432    
16     0      
0      400    
-96    80     
-112   -144   
32     400    
-144   -384   
176    -208   
-176   160    
96     112    
-32    64     
-16    16     
32     96     
-304   -16    
112    80     
-48    80     
16     80     
80     64     
-64    0      
80     48     
-48    0      
-144   -240   
144    160    
0      288    
-48    -16    
48     48     
-80    144    
96     208    
-96    112    
-96    64     
16     -32    
32     -160   
64     48     
-32    352    
128    224    
-144   224    
144    176    
-80    64     
-64    -144   
-176   -240   
16     176    
-48    -720   
16     0      
32     -16    
-48    112    
64     80     
208    80     
-272   80     
176    64     
-16    64     
144    32     
-144   112    
112    96     
32     48     
-128   -48    
64     112    
0      16     
192    -32    
-144   -240   
-16    128    
224    208    
-48    32     
288    -16    
-16    -64    
16     -48    
64     -112   
0      64     
-64    -160   
352    224    
-208   368    
-32    -48    
48     448    
128    176    
-112   0      
80     32     
-48    -112   
128    176    
48     448    
-32    96     
16     -64    
-80    128    
80     208    
-48    64     
64     144    
-144   -144   
96     208    
-96    96     
-208   608    
112    -208   
-400   -208   
320    -144   
0      560    
64     144    
-144   -912   
192    -80    
16     352    
0      160    
0      112    
144    144    
-80    -48    
240    96     
-160   32     
16     -736   
128    368    
-16    -80    
112    256    
-144   -32    
-96    -160   
128    224    
80     240    
144    -32    
-32    368    
96     -224   
-16    -48    
-80    64     
192    -128   
0      -48    
96     -432   
16     -96    
144    -144   
144    -288   
-160   -352   
-128   -496   
144    -64    
48     224    
-128   144    
-128   80     
-144   -96    
256    192    
-192   -16    
336    224    
-416   208    
160    -240   
-32    0      
176    416    
16     192    
-96    160    
32     -80    
64     -64    
560    560    
-640   208    
144    -160   
48     0      
96     240    
144    192    
-144   -144   
176    144    
112    112    
-16    64     
256    -336   
-224   -528   
-176   -432   
240    176    
-32    96     
-64    80     
272    16     
96     160    
64     96     
0      32     
32     -208   
0      -320   
80     112    
-32    -160   
-96    32     
96     32     
48     112    
144    -80    
48     64     
-16    112    
-224   -192   
368    -304   
48     -16    
-64    -176   
80     176    
-112   48     
-48    -176   
256    272    
128    112    
-272   -48    
-224   -496   
336    32     
-32    -528   
-112   16     
112    -32    
144    -96    
128    -32    
48     96     
32     96     
-96    -48    
320    160    
64     96     
160    112    
-240   96     
160    144    
-48    -144   
432    192    
-352   -32    
208    112    
0      -224   
192    112    
-64    -48    
80     80     
176    96     
-80    64     
96     144    
48     352    
112    80     
48     -752   
-96    32     
-80    -128   
-176   48     
144    -64    
80     64     
-112   -48    
64     -48    
-80    -64    
-64    96     
-96    -64    
32     -256   
144    192    
160    -112   
-64    64     
128    -144   
48     80     
16     -80    
112    16     
-160   -304   
272    144    
-240   -304   
-80    16     
256    112    
-128   -320   
144    -656   
64     48     
160    -1936  
64     -144   
-176   -96    
256    -176   
-128   288    
512    448    
-160   80     
0      -16    
80     -832   
80     -32    
64     -240   
-128   64     
-16    -176   
-144   -576   
64     -208   
240    -400   
160    64     
-80    -256   
-16    -224   
192    -1232  
-176   -256   
-16    32     
224    -16    
-80    -400   
160    16     
144    16     
-80    96     
-144   0      
96     48     
0      -32    
336    96     
-96    144    
96     192    
-80    -16    
-256   -704   
368    -32    
32     48     
-48    32     
0      -144   
32     32     
128    -48    
80     144    
64     -16    
-32    48     
0      128    
-96    -128   
-96    -112   
128    -48    
0      160    
64     -368   
64     -16    
16     -1008  
80     160    
16     32     
-112   112    
160    48     
80     32     
-80    -64    
16     -96    
-272   64     
-80    -144   
-928   -32    
272    48     
-48    -80    
288    -208   
48     -64    
96     -1360  
32     48     
32     -80    
240    112    
-192   -16    
-112   -64    
80     48     
144    -16    
-400   -32    
336    128    
-688   32     
-304   -160   
416    -16    
-272   -384   
-32    -480   
160    -256   
-112   0      
432    96     
-16    0      
-16    48     
160    -112   
-16    16     
224    -64    
-48    112    
112    144    
-192   96     
0      -64    
-176   -80    
112    112    
-128   208    
-80    48     
80     256    
64     -2416  
-112   -96    
32     -384   
-16    -256   
144    -208   
320    0      
-144   0      
208    -320   
-272   -432   
96     -352   
-144   -16    
-48    -160   
48     144    
128    -192   
-224   -128   
80     -2176  
224    16     
-96    256    
112    208    
-144   64     
144    160    
-48    208    
-64    -592   
-240   -320   
304    192    
-160   -464   
16     -688   
64     368    
144    32     
0      -96    
-96    80     
176    256    
-16    -272   
192    64     
-64    32     
64     208    
240    432    
-128   -224   
48     176    
-144   -144   
-224   64     
-16    0      
208    -32    
-352   160    
-144   32     
240    -336   
-1168  -80    
-32    80     
-192   0      
112    -176   
320    208    
-96    304    
-112   -400   
-160   -352   
128    16     
80     624    
-544   -80    
-48    -400   
80     -320   
-208   384    
-64    -176   
112    -96    
-160   320    
-160   -48    
-64    -176   
128    -48    
-128   -272   
80     432    
432    272    
-560   128    
-16    32     
208    144    
-208   176    
304    -160   
-528   -64    
48     16     
-112   32     
-32    16     
96     48     
-96    -64    
0      176    
-32    480    
-80    192    
-192   -48    
-176   -480   
160    -144   
96     -96    
-32    144    
48     16     
-144   -32    
-160   -16    
128    -112   
-96    48     
32     176    
0      544    
-320   240    
-32    -48    
-384   -48    
96     80     
-240   32     
112    48     
-176   -304   
112    -80    
-16    128    
144    16     
-320   -464   
80     -208   
32     112    
-96    -160   
-112   32     
144    16     
80     192    
-336   48     
80     16     
-832   -96    
48     80     
-80    0      
0      32     
0      48     
-64    48     
-192   96     
160    48     
-96    48     
-32    432    
48     -48    
0      128    
-112   672    
-240   -256   
-16    -384   
-112   528    
0      112    
96     -144   
32     432    
-288   -320   
-272   -448   
48     -48    
-16    304    
-48    -112   
224    144    
-272   0      
-112   -256   
-192   -144   
-288   144    
96     384    
-160   -272   
176    496    
80     112    
-32    -32    
192    256    
-112   -80    
-128   -176   
368    -32    
64     400    
96     176    
-160   -80    
-240   -240   
128    176    
-16    256    
80     0      
-144   80     
112    144    
-48    144    
32     16     
-16    48     
128    512    
144    272    
-208   48     
80     80     
-224   -128   
176    -32    
-48    -16    
480    512    
-320   320    
-96    544    
-240   -96    
64     80     
-96    0      
-160   -80    
32     32     
64     64     
0      64     
-80    0      
144    -32    
-256   64     
208    144    
-320   16     
80     128    
-208   -32    
-64    128    
-192   0      
48     112    
0      64     
64     0      
-112   16     
288    128    
-240   -80    
144    144    
48     64     
-16    64     
-80    -128   
128    -176   
96     144    
-192   0      
48     -224   
16     320    
176    112    
-448   32     
208    0      
32     64     
-64    -32    
64     0      
80     -48    
-224   160    
432    240    
-448   64     
-112   64     
256    48     
-192   -96    
272    -16    
160    80     
-32    32     
-144   144    
-96    64     
-144   96     
-112   192    
-112   320    
208    224    
-48    304    
0      144    
32     -16    
-208   -32    
432    224    
-224   160    
-80    176    
80     64     
-192   -160   
16     -48    
-64    -16    
-80    96     
-48    96     
-112   112    
-48    48     
-192   -16    
-16    -16    
-96    -64    
-64    144    
64     144    
112    160    
96     -400   
80     112    
240    128    
16     16     
-80    48     
320    288    
-96    288    
-352   32     
-32    -16    
112    -32    
256    240    
-192   256    
-240   112    
48     16     
96     48     
128    -608   
-32    160    
-48    64     
-16    80     
0      64     
32     48     
48     96     
320    240    
-304   96     
-80    -336   
-80    0      
-16    112    
-112   80     
-16    144    
64     0      
16     -112   
144    -32    
80     176    
224    240    
-176   96     
-80    -48    
208    -80    
288    208    
96     96     
-80    80     
208    288    
-224   112    
48     48     
96     -48    
-16    80     
128    -400   
16     80     
96     -880   
-16    64     
64     80     
32     32     
48     80     
-16    80     
-128   -336   
48     -208   
-32    208    
160    96     
-48    16     
80     -160   
48     64     
64     -192   
128    48     
-80    -480   
80     96     
-256   -112   
224    -16    
-16    192    
-16    32     
64     -32    
-112   160    
112    256    
48     144    
-112   -16    
176    -448   
48     48     
208    -48    
-128   160    
192    -400   
-48    192    
288    -2320  
-240   352    
-96    -48    
224    -112   
-48    16     
112    160    
16     144    
16     144    
80     96     
48     -16    
96     208    
-240   -320   
64     -16    
208    128    
16     0      
16     -48    
32     16     
240    16     
-272   48     
16     304    
208    48     
0      144    
32     -32    
64     0      
-32    -80    
176    -112   
-80    -304   
0      48     
208    -144   
-16    16     
-32    -32    
80     192    
-80    -16    
128    144    
192    96     
-32    48     
64     -368   
-80    -224   
128    240    
272    96     
-144   192    
-48    -208   
48     -208   
-16    -48    
160    352    
304    320    
-272   -496   
96     16     
-304   -432   
240    -288   
144    528    
48     -272   
384    192    
-320   -208   
32     -560   
-80    80     
128    -32    
64     48     
128    64     
64     256    
-64    -576   
272    688    
-96    320    
48     -224   
192    -400   
-16    400    
144    -448   
-64    -112   
160    -1216  
112    352    
48     -1456  
-112   -304   
-32    592    
-256   -608   
-128   352    
-96    -368   
16     -464   
-32    272    
160    -208   
-176   -80    
-272   -64    
224    64     
208    192    
0      -16    
64     176    
176    -368   
16     -144   
368    -416   
-304   -128   
80     -1072  
320    -400   
336    464    
-224   288    
144    -256   
-48    -128   
0      480    
144    528    
-32    -272   
-96    -272   
-144   -224   
32     -368   
-112   -160   
80     -992   
-144   48     
-32    -32    
224    -16    
-96    -384   
64     352    
240    496    
-96    256    
-64    -64    
-320   -512   
-544   -176   
144    528    
176    560    
-80    -624   
32     368    
-112   -288   
64     -240   
-80    48     
352    240    
-336   96     
256    -272   
-208   -16    
256    224    
-192   0      
112    -192   
16     -208   
-16    -16    
-48    -64    
80     64     
256    32     
0      320    
-144   -160   
256    -784   
32     384    
0      -128   
240    -160   
64     160    
16     112    
160    -256   
-240   32     
256    32     
-160   -32    
192    48     
80     0      
-160   -32    
-16    -384   
240    80     
-48    -144   
160    80     
128    -1168  
240    1008   
-240   -1136  
32     -944   
96     880    
-336   -464   
16     -624   
-64    432    
-336   384    
-80    208    
-1088  -480   
624    -432   
-160   1104   
192    96     
128    -208   
-64    -1552  
224    -64    
-96    -80    
112    16     
-176   -576   
144    288    
-240   64     
144    192    
-224   48     
-16    -112   
-64    -32    
-32    -352   
128    192    
-32    -112   
-160   32     
-112   48     
112    -64    
-80    80     
112    48     
-32    48     
80     -96    
-352   -224   
96     -592   
-32    208    
224    176    
48     176    
176    384    
32     -176   
-352   -384   
-32    208    
0      -64    
-64    272    
-112   208    
48     16     
-16    80     
-16    288    
0      208    
16     -192   
-64    80     
288    -16    
-256   -48    
-880   -192   
144    224    
-624   -112   
-16    96     
240    -96    
-464   -64    
-64    32     
-176   96     
48     -32    
32     32     
16     112    
96     128    
0      32     
48     -96    
-144   144    
-304   -208   
-80    0      
32     -64    
-112   -32    
-16    -16    
0      0      
144    64     
-16    0      
48     0      
-224   96     
-32    -144   
-128   -16    
32     -16    
-224   -112   
240    112    
144    16     
-32    112    
-432   -288   
128    -144   
48     64     
-128   176    
96     176    
-160   96     
80     80     
-544   64     
0      48     
-1632  -96    
0      -176   
80     -144   
32     160    
-32    -80    
-48    80     
-112   0      
16     -32    
32     64     
0      0      
64     -16    
-16    0      
0      -80    
64     -112   
-192   -32    
144    32     
-32    96     
-112   -48    
144    160    
-400   -336   
416    32     
32     32     
32     48     
16     32     
-144   16     
0      48     
-384   -160   
112    128    
-384   0      
112    64     
-64    0      
160    272    
-1536  -96    
16     144    
-256   -96    
112    64     
48     304    
16     144    
-64    16     
112    144    
192    352    
-16    176    
160    -192   
64     -208   
224    -16    
-432   -128   
80     -48    
-960   -112   
16     -32    
128    160    
160    304    
-80    304    
-32    -64    
-96    -176   
80     -240   
-48    0      
176    32     
16     96     
-64    -16    
32     96     
-304   -176   
16     160    
112    32     
-176   64     
-320   176    
-48    64     
-112   64     
144    96     
-112   16     
176    160    
0      48     
-176   16     
112    80     
-176   -192   
208    -16    
-112   80     
64     128    
-176   16     
-256   -112   
288    32     
-64    64     
64     16     
16     96     
160    32     
-32    16     
80     112    
48     -16    
-96    32     
-48    -48    
96     -96    
-64    -32    
208    192    
-64    -320   
-256   64     
-16    64     
-80    128    
96     48     
32     48     
16     128    
-32    0      
-80    16     
0      16     
-16    64     
-48    -96    
48     16     
-112   64     
80     160    
-304   32     
-64    -32    
128    80     
128    96     
16     160    
-48    128    
-96    32     
-16    48     
64     96     
16     80     
32     96     
-48    16     
-64    80     
-128   -144   
192    160    
-48    112    
96     112    
64     144    
-80    -80    
112    96     
-16    -144   
-48    -176   
176    0      
-144   -96    
176    32     
-112   48     
-128   32     
96     80     
112    96     
-304   96     
208    -224   
-112   -240   
256    304    
0      80     
128    592    
304    640    
96     480    
-16    128    
64     144    
-144   -80    
144    48     
32     368    
64     160    
128    96     
-48    48     
128    16     
32     -48    
-16    176    
112    112    
32     -224   
176    64     
64     336    
-224   -208   
96     -144   
128    128    
128    112    
224    800    
-128   32     
96     160    
128    -432   
-208   -80    
112    96     
-304   -112   
-208   -368   
112    496    
-16    352    
-208   -128   
64     96     
-32    192    
-16    16     
-48    64     
-48    -352   
112    144    
-32    80     
352    -208   
16     48     
-128   16     
48     0      
48     112    
64     32     
64     128    
48     64     
64     112    
160    416    
-160   -80    
432    -32    
-304   16     
-16    -192   
0      48     
32     240    
176    240    
-176   -208   
-48    384    
-160   -32    
-128   -160   
112    240    
-128   176    
-80    80     
-48    -32    
-304   -224   
272    -288   
-320   -160   
384    -160   
-16    256    
96     -240   
304    -160   
-176   -1296  
256    48     
144    -32    
128    272    
208    32     
-176   256    
-320   -496   
128    -224   
160    144    
-16    112    
112    192    
272    224    
16     48     
64     -192   
336    304    
-64    -448   
144    -128   
544    -688   
-224   608    
-224   -64    
176    -256   
48     -160   
-336   224    
320    160    
96     208    
-320   272    
-176   -608   
144    -352   
-112   304    
96     96     
240    176    
-160   128    
80     -16    
-144   -64    
352    64     
-48    -16    
96     64     
208    96     
80     224    
-32    128    
240    -176   
288    128    
48     -48    
64     112    
-48    -32    
-176   -1248  
224    352    
336    128    
-64    672    
32     -352   
272    208    
0      48     
96     -144   
-128   -464   
96     144    
160    -192   
-288   -304   
144    -1280  
432    -192   
128    1072   
-144   -640   
192    96     
0      128    
96     304    
64     224    
-48    32     
560    464    
-336   -32    
-16    -560   
304    -64    
208    224    
128    192    
-288   -304   
160    -192   
96     320    
144    336    
-80    160    
176    -160   
-48    128    
112    192    
-80    -240   
32     112    
48     -544   
112    -416   
-192   272    
32     -576   
304    144    
-352   -16    
144    -480   
256    48     
112    144    
0      112    
32     -160   
0      -912   
112    -608   
128    -384   
48     112    
-352   -128   
544    464    
-304   -240   
192    -112   
64     -384   
80     -304   
48     -112   
-16    -512   
512    288    
-224   240    
176    -352   
-144   -320   
16     112    
160    16     
160    0      
-208   -320   
-80    -240   
32     -96    
96     -416   
-48    -80    
416    32     
-176   64     
80     -1536  
48     -208   
304    -144   
-208   0      
80     160    
-112   96     
-32    -80    
224    -272   
-240   0      
192    -96    
-784   64     
224    48     
-112   -112   
256    32     
-32    112    
16     -480   
160    0      
0      96     
-144   80     
272    -64    
-80    80     
112    -160   
32     48     
-64    -16    
240    320    
-560   -80    
-48    -96    
288    -320   
-32    -80    
-32    112    
32     16     
96     0      
16     -1104  
-16    160    
16     -112   
176    64     
-96    160    
176    48     
-192   64     
192    -144   
-272   -16    
48     -48    
-448   32     
64     -80    
-80    -48    
192    -64    
48     64     
144    -640   
-32    -32    
96     32     
96     112    
-96    96     
32     48     
-64    -176   
-176   -112   
80     0      
0      128    
48     144    
-48    0      
-1632  -32    
208    -176   
48     0      
128    -304   
32     -16    
80     -64    
48     112    
-32    16     
-176   -112   
-160   -240   
-80    -192   
-48    -160   
-48    128    
-64    80     
80     -160   
-128   192    
208    16     
-32    -32    
272    0      
-128   80     
144    -272   
96     -48    
48     -16    
-80    -112   
256    208    
128    -64    
-96    48     
0      -144   
96     144    
-112   0      
16     80     
48     -80    
32     144    
-16    -320   
48     208    
144    112    
-112   64     
64     80     
32     800    
144    32     
112    64     
-96    -16    
48     -256   
-160   -144   
64     -64    
112    144    
-464   -240   
128    0      
-752   -336   
192    240    
32     48     
-176   0      
64     96     
-80    -112   
0      -96    
0      96     
16     16     
32     16     
-32    176    
-176   -80    
-112   80     
-368   -128   
32     0      
-480   32     
-128   -32    
-144   48     
0      -48    
-32    -48    
-336   16     
16     16     
-1536  -16    
128    112    
32     48     
-96    -64    
-32    -224   
-32    16     
-80    -80    
16     144    
96     112    
176    80     
-320   16     
-48    16     
-112   0      
-432   -208   
208    -16    
-160   80     
-160   0      
-1088  -80    
32     -32    
-80    -112   
112    144    
-192   -32    
32     48     
64     64     
-16    16     
96     16     
128    256    
32     -16    
-64    -32    
80     112    
-144   80     
-80    16     
16     224    
224    192    
-416   0      
64     48     
-64    -16    
64     48     
80     80     
-352   112    
32     -160   
288    -16    
32     48     
-256   -80    
-16    128    
-80    -32    
96     32     
-320   -32    
64     96     
-96    -48    
112    96     
-96    -144   
-112   -112   
-32    16     
0      128    
224    1264   
32     480    
-496   -1104  
96     640    
-144   112    
-176   -272   
144    160    
-304   48     
80     32     
-832   -128   
112    80     
-32    -32    
-48    64     
96     96     
16     32     
-32    48     
-48    48     
128    544    
-64    -112   
-176   -80    
112    -544   
16     560    
-128   -208   
96     176    
-224   128    
-16    -48    
-16    128    
-48    -80    
0      208    
-32    -128   
-96    64     
32     48     
-304   -912   
224    32     
-16    240    
-96    32     
224    192    
-352   -80    
176    128    
-560   -64    
96     -144   
48     -64    
0      496    
0      -64    
-112   0      
-64    -16    
-48    -160   
-16    -32    
112    128    
-112   464    
128    224    
112    352    
-192   240    
160    -176   
-160   -528   
16     -64    
-16    32     
80     48     
-80    80     
80     -16    
-64    160    
144    48     
-256   80     
64     -32    
-112   64     
16     -32    
96     144    
80     48     
16     80     
32     688    
272    640    
-160   192    
272    224    
-176   208    
-48    -16    
-272   -80    
-16    -400   
96     -160   
128    128    
-160   -192   
32     -64    
224    416    
-176   32     
144    256    
208    0      
-336   -32    
-96    -208   
-304   -144   
272    32     
-240   -160   
160    336    
-64    176    
-256   16     
-112   112    
48     144    
-112   64     
-240   -320   
-176   32     
96     -32    
-80    -400   
176    656    
-128   32     
112    48     
0      176    
-16    -16    
-96    -80    
0      160    
0      128    
144    160    
-400   0      
304    -336   
-112   128    
352    240    
16     48     
32     144    
208    144    
96     272    
-128   -656   
-64    176    
192    720    
-272   128    
272    -16    
-96    416    
16     0      
96     -64    
-96    -64    
752    656    
-320   -64    
160    -96    
48     64     
-64    -64    
112    -224   
-272   -544   
320    -32    
256    416    
-240   -112   
144    -16    
-336   -400   
-96    -256   
144    64     
-160   320    
208    368    
-128   368    
352    144    
-208   352    
-96    80     
64     272    
48     128    
96     0      
80     80     
-32    -432   
-96    -336   
-16    -64    
32     32     
-80    -112   
144    -192   
160    -272   
80     96     
32     -32    
160    160    
16     128    
112    448    
144    176    
-144   -16    
16     -112   
176    64     
368    256    
-192   224    
-80    288    
64     -112   
0      -208   
176    -48    
80     144    
-112   -80    
272    320    
-304   -432   
192    32     
160    112    
-64    -128   
288    224    
288    224    
-48    304    
-16    192    
-16    -112   
32     -64    
0      0      
-32    -160   
128    -80    
-48    -448   
336    -16    
64     -864   
48     80     
112    80     
-32    176    
240    80     
-160   64     
48     48     
-16    128    
128    64     
-80    -32    
128    96     
112    0      
48     64     
80     -128   
48     64     
-16    -112   
176    -48    
-144   -160   
80     144    
-320   -592   
320    64     
-32    96     
80     0      
64     48     
-16    -96    
112    32     
-64    -128   
128    80     
-144   -96    
112    64     
0      -192   
112    96     
48     -1120  
0      -80    
64     32     
192    128    
48     -16    
64     32     
96     0      
-80    -176   
80     80     
128    -32    
-112   96     
96     -208   
112    96     
272    128    
-272   128    
16     -16    
16     0      
80     144    
96     32     
-48    48     
64     64     
-48    48     
144    -256   
16     128    
192    16     
-272   64     
16     -224   
192    128    
-176   96     
128    176    
-128   -16    
32     32     
80     -112   
80     80     
0      -64    
80     256    
-288   -288   
128    16     
80     0      
48     -304   
32     -16    
48     -368   
96     16     
-64    -16    
256    80     
-48    -80    
-16    -2432  
-96    -224   
32     -784   
32     240    
-880   -80    
-48    -80    
80     -80    
144    -336   
144    96     
-32    -704   
112    -112   
176    192    
48     -16    
0      16     
160    0      
-32    -576   
48     -16    
96     -112   
64     160    
-64    64     
-96    -320   
48     -80    
0      -592   
48     -16    
32     -128   
96     0      
-16    -1504  
224    80     
176    -112   
96     160    
-96    -176   
160    96     
-80    32     
272    -112   
-368   -64    
128    -208   
-1472  0      
64     48     
-48    -144   
352    -80    
-144   -192   
-32    -432   
144    -96    
-16    -112   
-32    32     
-128   -272   
32     160    
160    -32    
-272   -80    
0      96     
-16    64     
64     -64    
-16    80     
96     -80    
0      -96    
96     -64    
144    -384   
-64    0      
-128   -864   
128    48     
64     -112   
-32    128    
-32    0      
48     0      
192    160    
-128   -64    
-16    -16    
112    -80    
-32    32     
-208   -304   
208    160    
176    80     
-48    32     
32     -560   
144    48     
-80    -48    
-16    -112   
-96    -96    
320    -32    
16     0      
48     -80    
-160   192    
-240   -240   
-624   -32    
48     48     
-176   176    
-464   -48    
32     -80    
112    -576   
64     160    
64     16     
-112   -48    
-64    -48    
48     -128   
-112   -336   
176    -352   
-48    -224   
400    304    
-192   416    
80     64     
16     -48    
192    -144   
-80    -80    
0      -208   
144    176    
0      -528   
64     -256   
-384   80     
208    -160   
-384   16     
48     -96    
192    352    
32     288    
16     -240   
96     -16    
304    48     
-112   -336   
320    -48    
-192   -256   
96     304    
-192   -352   
32     224    
96     -80    
-64    -48    
32     -16    
-64    0      
64     64     
-176   -96    
432    544    
-48    192    
-368   -224   
128    -304   
96     -96    
-320   -224   
480    96     
-240   64     
80     16     
32     32     
-16    64     
16     48     
64     16     
-32    16     
64     -16    
32     64     
336    128    
-224   16     
-240   -160   
176    256    
-144   -144   
-560   -32    
-16    32     
-288   -64    
32     -16    
-352   48     
144    384    
-736   -32    
-160   -256   
144    192    
80     -80    
-16    -144   
48     -64    
-272   16     
-16    112    
-96    -16    
0      96     
-80    64     
-144   32     
-112   -176   
-144   -48    
-96    32     
-480   112    
0      48     
96     16     
-48    48     
-352   -384   
208    -192   
-128   -32    
32     32     
-288   -48    
288    -272   
-304   -528   
112    -160   
-160   48     
16     -48    
80     48     
-128   112    
48     -48    
96     0      
-96    32     
-64    16     
192    224    
48     -16    
16     96     
-32    64     
-96    -16    
-48    48     
-384   -480   
-80    -656   
-32    -240   
96     288    
-32    -96    
-112   -16    
-352   -208   
-64    -32    
64     -144   
80     128    
-240   -32    
160    688    
-64    528    
-560   -592   
208    -272   
-96    240    
48     208    
-224   -288   
-48    -624   
48     32     
-80    416    
-288   -48    
96     -544   
-160   160    
32     48     
-128   -48    
80     -16    
0      -16    
-32    -96    
80     272    
32     272    
-160   -48    
-16    80     
-16    -912   
16     -176   
96     128    
0      144    
128    224    
-432   144    
-96    -48    
48     -528   
-144   -352   
144    -240   
-80    32     
0      0      
0      240    
-64    64     
-272   0      
64     272    
112    112    
-176   -304   
-96    -432   
-16    48     
-176   -64    
144    96     
96     112    
-112   128    
96     160    
-288   -80    
-96    -16    
-16    64     
-208   -48    
320    384    
-288   176    
-160   -112   
16     64     
-192   160    
80     0      
-32    80     
-144   112    
-112   -112   
-432   -272   
192    32     
-64    112    
-208   112    
-48    32     
-16    -16    
160    96     
-112   64     
-144   128    
-64    160    
80     496    
0      32     
192    160    
-128   32     
32     32     
32     -64    
160    -64    
48     112    
160    144    
-16    128    
48     80     
-160   0      
160    80     
48     64     
48     80     
-16    16     
320    160    
64     64     
-32    -32    
144    144    
-16    16     
96     112    
64     80     
-48    0      
-128   -64    
128    64     
80     304    
-48    176    
-64    80     
176    16     
0      0      
320    224    
-272   80     
0      48     
160    80     
0      112    
96     160    
144    112    
-160   48     
144    80     
-48    48     
32     64     
48     64     
-112   32     
176    144    
-144   16     
-64    64     
144    224    
112    144    
32     96     
16     160    
272    48     
16     128    
-128   16     
80     80     
-80    48     
80     64     
48     144    
0      272    
368    32     
-400   -288   
368    64     
-240   96     
112    80     
96     16     
-176   16     
144    48     
-192   0      
192    80     
80     64     
160    256    
-272   0      
-32    0      
160    -48    
64     96     
48     80     
64     352    
64     32     
64     -112   
48     -176   
160    192    
128    -16    
80     192    
16     -128   
48     160    
304    112    
-256   144    
0      -48    
64     208    
144    48     
16     48     
0      -720   
320    208    
-128   96     
48     160    
64     48     
512    400    
-464   112    
0      -336   
176    -208   
48     176    
96     64     
0      32     
32     48     
-16    -416   
-32    128    
96     -32    
0      80     
256    16     
-240   80     
336    64     
-16    96     
32     96     
16     0      
-64    -240   
160    144    
-96    -64    
320    48     
-272   192    
-112   -224   
128    32     
-32    -128   
48     80     
-48    -880   
80     112    
96     144    
0      112    
416    400    
-352   144    
112    -48    
128    96     
0      32     
160    32     
-32    32     
224    64     
64     192    
48     -112   
112    48     
272    -64    
-256   80     
224    -416   
-48    96     
160    64     
0      112    
-48    128    
208    128    
-32    80     
16     -32    
32     80     
64     -16    
16     96     
16     -272   
96     80     
0      16     
160    64     
80     -640   
144    64     
-112   -96    
624    560    
-416   352    
0      80     
-144   -112   
144    -16    
208    96     
-160   48     
48     144    
-144   -80    
192    48     
64     -176   
288    224    
-528   -688   
336    -432   
192    -64    
144    208    
-80    80     
240    176    
-16    48     
0      -160   
48     -128   
192    0      
16     176    
-48    32     
96     -64    
256    -176   
48     128    
16     96     
-16    16     
208    32     
0      640    
288    288    
-336   160    
32     112    
48     -80    
80     128    
0      144    
-48    432    
-48    -80    
240    256    
32     -400   
64     48     
-32    -1056  
128    -528   
96     48     
144    -304   
-32    64     
32     -384   
-128   -1248  
-80    -64    
64     -688   
-32    -128   
160    96     
112    128    
16     -112   
64     80     
176    352    
-272   -400   
384    -1088  
128    416    
-96    -752   
400    -16    
-240   48     
176    -112   
-32    192    
144    -368   
304    336    
-64    -448   
-80    -304   
256    -112   
176    416    
-160   96     
64     -464   
80     -368   
-272   80     
-128   -528   
96     -320   
-144   128    
-80    -480   
-16    -352   
80     -224   
80     -32    
48     -304   
-16    -128   
-64    -1024  
176    -176   
16     -64    
-208   -176   
128    -272   
-144   -448   
112    -304   
176    16     
-208   0      
-32    16     
-1072  -32    
128    -16    
16     0      
-16    32     
272    -16    
16     -224   
0      -224   
112    -48    
32     48     
112    16     
-128   16     
208    176    
16     16     
-64    32     
-64    384    
80     288    
-176   -256   
112    -288   
80     -368   
-64    -96    
288    -304   
-160   416    
112    -560   
80     144    
496    128    
-288   208    
-112   -64    
208    -32    
-48    80     
-64    -80    
-272   -32    
32     0      
-1824  -16    
16     -96    
192    112    
-96    -160   
48     -96    
-16    -208   
96     96     
0      -16    
96     80     
0      16     
32     400    
112    320    
-464   -816   
-160   -672   
160    -112   
-544   144    
64     192    
-368   112    
16     -32    
80     192    
0      -112   
384    272    
-112   256    
-32    128    
160    -80    
80     -48    
96     32     
0      -32    
-32    16     
0      -16    
-288   -320   
272    560    
-240   176    
-240   -1200  
160    32     
-32    176    
-128   -288   
112    -1136  
96     48     
-688   -352   
192    -336   
-80    1024   
-64    -32    
-112   -112   
-16    -224   
-64    128    
192    -592   
-64    -16    
112    -144   
-48    64     
96     -48    
-128   -384   
80     -160   
-160   -160   
-144   -384   
-96    -208   
16     48     
160    368    
48     592    
176    192    
-304   -96    
176    -192   
-208   32     
544    -160   
-16    160    
-96    0      
-560   -80    
32     32     
-1040  16     
-192   144    
-944   -208   
-656   -144   
560    -480   
-288   -64    
256    -96    
-80    48     
16     32     
-112   128    
-80    0      
144    96     
-224   -464   
624    176    
-272   176    
256    -32    
-32    80     
-304   -64    
-32    -32    
-240   -48    
-96    -80    
528    80     
-496   -32    
320    -160   
-128   176    
64     -112   
-80    96     
-112   0      
224    128    
-64    0      
-112   -64    
304    0      
-208   144    
128    -144   
-352   144    
240    64     
-368   64     
80     16     
-64    -16    
192    192    
-272   160    
-32    80     
128    64     
-16    0      
240    176    
-48    80     
-112   48     
-64    16     
-48    80     
-16    -144   
0      80     
-768   80     
-96    64     
-144   -48    
64     32     
80     0      
64     48     
-80    128    
16     -16    
-32    64     
32     64     
-176   32     
48     64     
0      -16    
-160   -16    
-192   -32    
-848   -224   
-32    32     
144    -32    
192    112    
-208   -64    
48     160    
-176   -32    
64     32     
16     144    
-160   96     
-96    -32    
144    80     
-128   -80    
80     32     
176    208    
-272   -64    
128    80     
80     64     
80     -48    
-80    -160   
-32    -16    
-80    96     
112    -16    
-16    16     
144    128    
-64    96     
80     -80    
-256   -48    
80     0      
-96    80     
-128   -80    
96     64     
-288   -32    
-16    64     
-32    64     
240    448    
-288   208    
-48    112    
112    -96    
-144   48     
32     160    
-160   -96    
-176   80     
160    16     
-176   16     
-112   -80    
64     192    
-144   -16    
-96    32     
96     112    
32     176    
0      96     
48     208    
176    96     
-208   48     
272    208    
-176   144    
192    48     
-336   48     
112    64     
-144   -32    
48     80     
-160   -256   
-48    48     
48     64     
-112   112    
0      -32    
112    32     
64     112    
48     32     
112    128    
-48    64     
96     208    
-64    -32    
144    80     
256    208    
-240   96     
160    128    
96     96     
-16    16     
-32    -48    
-176   0      
240    64     
-80    32     
48     0      
32     96     
-48    96     
128    112    
-160   0      
272    240    
-336   32     
-112   64     
288    48     
-32    0      
144    128    
-112   -32    
112    16     
112    144    
-64    80     
-96    -16    
112    64     
-80    64     
272    128    
-112   48     
-96    -80    
-32    -128   
160    96     
-128   112    
-48    80     
0      16     
80     48     
64     64     
-64    80     
-16    32     
-144   80     
128    80     
-160   -48    
96     -80    
176    464    
-80    80     
-240   -32    
16     384    
-48    336    
-96    240    
-192   -176   
-16    -176   
176    -16    
-80    144    
80     80     
0      64     
112    144    
-96    0      
64     176    
16     48     
-112   176    
240    368    
-32    960    
-224   608    
80     -16    
0      -80    
176    -32    
-96    160    
16     -64    
96     240    
-16    640    
96     368    
48     448    
-208   624    
-64    320    
-144   224    
-80    -224   
96     -880   
-128   -192   
-208   96     
64     144    
-80    80     
-64    160    
80     96     
0      96     
48     16     
-144   -32    
96     -320   
16     -80    
256    -192   
80     -192   
64     208    
-160   -1152  
80     0      
-64    256    
128    384    
-144   -224   
480    48     
-80    880    
112    480    
-288   -576   
160    400    
16     192    
-64    -96    
112    -80    
0      -288   
368    144    
0      -176   
-96    -176   
16     96     
224    16     
-48    -96    
80     240    
48     112    
-48    -16    
-80    -48    
32     272    
240    0      
-176   64     
208    32     
144    0      
-176   112    
224    48     
32     16     
16     -928   
160    192    
0      144    
16     -16    
-80    -32    
112    -32    
-64    320    
128    96     
-176   -384   
-80    -64    
144    -224   
-48    -144   
432    320    
-160   272    
-176   560    
192    -352   
128    368    
160    -1184  
160    208    
-96    256    
160    192    
-48    48     
48     144    
-64    -96    
16     -32    
-16    -128   
144    32     
-16    144    
128    -240   
96     208    
256    -304   
-320   112    
320    -336   
-32    96     
16     0      
64     80     
48     48     
64     112    
32     48     
32     128    
80     80     
304    -528   
-256   16     
112    80     
16     240    
176    16     
48     448    
-16    208    
112    16     
0      80     
-64    -144   
0      -208   
-48    -80    
64     -176   
272    -496   
-288   64     
192    -464   
-64    16     
208    -48    
-48    0      
16     -400   
96     208    
-16    64     
128    -48    
0      32     
-192   -528   
-48    -400   
160    -2672  
208    -128   
96     96     
64     16     
64     176    
80     16     
-112   -576   
-352   -1104  
336    -576   
64     1120   
-128   -16    
128    -1376  
80     64     
-80    -192   
112    -16    
-1184  -400   
160    192    
-48    -176   
320    704    
-80    -96    
192    -1280  
160    64     
-64    0      
144    -96    
32     16     
80     160    
48     224    
0      16     
48     -416   
352    368    
-960   320    
16     64     
80     -32    
144    -272   
-96    -224   
96     -1168  
176    112    
-160   -1024  
-80    144    
96     0      
32     80     
0      -32    
0      -80    
192    -64    
176    16     
-192   -48    
64     -112   
-672   160    
-448   16     
192    -192   
96     128    
32     96     
64     -64    
64     -32    
48     -96    
-64    128    
-16    16     
48     -208   
112    -48    
96     208    
-80    -80    
-32    -176   
-176   -112   
-16    32     
128    112    
64     32     
48     -48    
16     -496   
-624   -80    
224    -1264  
96     144    
112    48     
-112   64     
-80    32     
128    -176   
-224   -256   
160    -96    
96     160    
-32    144    
80     128    
160    -176   
80     -16    
208    -688   
16     32     
48     -864   
-144   0      
208    -224   
240    128    
-272   -96    
80     -96    
-96    16     
-64    -32    
-80    -16    
224    -16    
-592   -176   
80     -160   
80     -16    
0      -352   
624    -112   
144    -144   
160    16     
128    -160   
64     -160   
208    144    
-176   64     
-64    64     
208    64     
144    -48    
-112   -288   
-96    112    
-32    -32    
-48    64     
-48    -208   
176    176    
352    -496   
-32    144    
208    -1664  
112    -16    
-16    32     
176    -32    
-64    64     
128    -48    
-240   -144   
256    0      
0      80     
128    32     
192    144    
-176   -208   
112    176    
160    -208   
96     96     
-224   -16    
80     48     
-16    -48    
-192   -96    
-80    -32    
64     304    
-48    64     
0      0      
-160   80     
128    16     
-176   64     
80     -160   
48     -32    
-16    32     
-144   112    
-160   -288   
-672   -160   
128    176    
144    -80    
-128   80     
208    64     
0      0      
144    -128   
-176   -112   
-80    -176   
96     336    
112    -80    
-176   144    
-112   0      
0      48     
-176   -96    
-576   -80    
-80    -80    
-176   112    
112    -112   
-528   -48    
-32    160    
-64    -96    
-80    48     
-48    -48    
176    48     
-480   -96    
96     -64    
-224   -16    
-16    48     
-96    -128   
-16    176    
128    96     
48     48     
-80    -16    
-432   0      
-144   -128   
96     -32    
-48    16     
0      32     
128    224    
-304   -16    
-64    96     
0      64     
0      -64    
-48    64     
16     48     
-112   32     
-208   -16    
96     80     
-192   0      
64     64     
-960   48     
128    48     
48     -48    
-64    48     
-16    -112   
160    64     
-48    48     
-176   -96    
16     -48    
-144   -32    
-48    0      
-80    -16    
16     0      
-112   -48    
112    16     
-304   -160   
192    96     
-272   -96    
96     48     
-32    -176   
-16    96     
160    32     
80     -96    
-224   112    
64     272    
-176   272    
96     96     
192    48     
32     0      
-96    32     
-128   -64    
64     32     
-144   48     
64     384    
16     48     
112    -16    
32     416    
64     96     
-192   288    
208    224    
-144   64     
-80    -32    
0      0      
-224   -32    
0      32     
-160   -48    
144    176    
-352   64     
416    656    
-528   -464   
-160   -448   
-32    432    
-144   288    
208    -384   
-128   0      
320    208    
-240   80     
160    48     
-64    -192   
16     160    
-64    0      
-32    -48    
-240   -240   
144    112    
0      -192   
208    64     
32     432    
32     -160   
-80    32     
0      -80    
-144   -144   
32     96     
-144   416    
-32    368    
-336   -608   
-128   -128   
32     464    
-336   112    
16     -272   
-64    80     
192    32     
32     32     
-32    64     
-160   -144   
-192   272    
240    160    
-304   80     
-16    272    
176    -176   
128    368    
-336   64     
-80    -144   
-304   -992   
-240   -352   
288    48     
-176   608    
16     144    
-384   -320   
240    144    
-48    112    
-208   -144   
240    176    
96     176    
112    32     
64     464    
-256   -448   
144    -576   
496    784    
-160   560    
64     -224   
-48    -64    
192    48     
-224   -288   
528    -144   
64     880    
32     320    
-128   -352   
0      528    
160    240    
-224   16     
-16    -608   
-160   -288   
-16    160    
192    32     
-128   144    
192    32     
176    160    
-352   96     
368    128    
-96    -16    
80     128    
48     160    
-64    288    
-64    112    
176    80     
-128   48     
-48    560    
128    304    
-128   -128   
64     32     
-80    -272   
-64    -80    
128    48     
-80    -48    
-80    -48    
80     80     
192    592    
64     288    
-128   -32    
144    -48    
-272   -16    
160    -96    
32     96     
-48    16     
96     -256   
-16    432    
320    1184   
112    976    
80     160    
-224   -208   
432    -352   
-384   64     
16     96     
80     80     
96     64     
-48    96     
64     -320   
32     32     
32     96     
32     80     
64     64     
-16    48     
240    32     
-288   320    
304    112    
-16    -128   
64     -16    
96     272    
-160   -48    
64     -224   
48     -80    
-48    -1680  
176    160    
-224   288    
128    16     
272    208    
-336   -208   
240    176    
-48    192    
-80    48     
80     -48    
-160   -96    
336    352    
-16    -112   
128    -48    
-64    -48    
-32    -384   
144    -336   
48     160    
128    160    
-32    416    
144    432    
-160   -256   
-112   -256   
128    -544   
-64    -128   
112    -352   
-96    128    
320    144    
-128   -96    
96     -112   
-48    -352   
48     -64    
80     -800   
-224   -176   
336    -320   
-96    16     
208    -400   
-16    48     
0      80     
112    64     
-112   0      
112    96     
-192   112    
112    -112   
16     32     
-128   -128   
176    0      
0      -736   
112    112    
48     176    
48     80     
80     -64    
-16    48     
208    -32    
112    352    
-272   64     
-112   -368   
0      160    
208    -80    
-128   80     
176    -16    
-16    208    
48     -1040  
16     112    
-144   -256   
384    0      
-80    128    
96     48     
32     80     
32     112    
160    160    
-144   -48    
240    64     
48     -32    
144    128    
-16    0      
80     64     
64     -48    
128    80     
64     -96    
-32    16     
-64    16     
-112   -48    
128    -48    
96     -80    
-448   -128   
304    -272   
-400   -80    
-96    -480   
16     256    
64     -80    
-80    128    
96     -240   
32     -64    
16     -224   
144    0      
240    -16    
176    48     
32     128    
48     80     
16     -96    
-80    64     
-80    336    
-32    16     
-80    32     
240    -16    
192    128    
-112   0      
32     80     
-128   -496   
208    208    
-64    -64    
-176   -656   
448    0      
-864   -240   
128    -1024  
-80    -240   
272    -368   
96     48     
32     -16    
32     48     
64     240    
-128   -160   
160    160    
112    -32    
-80    -288   
-16    144    
144    -16    
-32    32     
-560   -112   
-176   -368   
96     32     
-32    -304   
96     -144   
-96    -1408  
80     -96    
-144   80     
112    48     
-16    -96    
32     96     
144    -96    
0      80     
112    -80    
-256   -64    
-96    -96    
0      64     
-80    16     
48     -16    
128    -128   
160    -352   
-176   -288   
208    -48    
-64    32     
16     -48    
-16    48     
80     -256   
0      80     
16     -80    
176    -16    
-32    -304   
-96    -256   
112    32     
112    -240   
-32    -144   
16     80     
304    48     
32     -448   
48     32     
96     -176   
96     176    
128    64     
32     80     
16     80     
112    -48    
-336   -96    
64     -208   
-1104  -128   
32     -64    
-64    16     
80     96     
144    112    
48     16     
-16    -96    
144    -368   
-112   16     
144    -48    
32     128    
96     96     
-240   112    
-64    16     
176    32     
-208   -64    
0      -64    
-416   -16    
48     -176   
64     -32    
-32    -224   
0      128    
-48    80     
48     96     
48     112    
48     112    
-96    80     
32     -112   
112    48     
544    544    
-272   608    
-80    160    
-208   144    
80     -272   
-128   -32    
16     -256   
32     -112   
192    -432   
-48    -32    
96     -1152  
96     -464   
-48    96     
176    112    
-256   128    
272    128    
-336   176    
240    160    
-288   272    
272    -304   
-272   -288   
80     -96    
80     -16    
-16    -112   
64     -144   
-192   -176   
-16    32     
0      224    
368    368    
-512   -608   
272    224    
-416   80     
128    256    
128    64     
-32    -64    
64     -48    
-176   96     
192    16     
-96    32     
80     128    
16     112    
176    -112   
-144   64     
96     -64    
-160   32     
128    -32    
64     48     
-112   144    
64     -240   
64     -176   
64     192    
-1072  -32    
0      496    
-288   -240   
-208   -304   
112    -352   
-752   -464   
32     -224   
-816   400    
-96    80     
64     96     
-176   112    
-80    -256   
256    -448   
-912   544    
96     -96    
96     -336   
-80    224    
-80    -112   
-304   -48    
-96    192    
-176   144    
-16    384    
208    -96    
112    -64    
32     -32    
-176   256    
272    64     
-288   -320   
-224   128    
208    32     
-32    96     
-176   -48    
208    -80    
-304   -176   
-16    -480   
-144   64     
-80    288    
48     336    
-80    64     
-928   80     
-32    -48    
192    112    
-32    96     
48     -16    
64     80     
560    400    
-576   272    
0      -560   
16     144    
144    176    
-64    -96    
-192   192    
160    144    
-64    64     
-160   -320   
-96    224    
-880   -48    
-48    -144   
-224   -144   
288    -416   
-64    -64    
-224   -544   
256    -160   
32     96     
-112   672    
-16    64     
-464   -208   
240    -192   
-208   224    
-192   80     
176    -336   
-416   336    
240    -432   
-304   -176   
192    -112   
-432   -208   
352    -1040  
128    640    
-272   16     
96     -528   
32     176    
208    976    
-224   -32    
96     -64    
-528   -64    
544    -16    
-656   -32    
32     16     
-240   -128   
0      0      
-32    224    
-96    -80    
-64    368    
64     -224   
32     240    
0      176    
-48    -416   
-32    -64    
-64    -64    
-176   -112   
224    -144   
-96    16     
-144   -80    
-16    288    
-192   0      
304    48     
32     224    
-16    32     
64     128    
80     -32    
-112   144    
112    -16    
-64    -752   
192    352    
-352   -80    
288    -64    
-176   0      
-16    48     
-480   -352   
-128   -240   
128    0      
-96    96     
256    112    
-80    128    
32     0      
-16    48     
0      48     
-48    16     
16     64     
304    208    
-288   -16    
48     -144   
-80    176    
-96    -160   
80     336    
-80    256    
-16    368    
64     80     
-176   -80    
128    -80    
-160   -192   
32     -16    
-144   64     
-256   -64    
160    -240   
80     128    
-240   -128   
-128   112    
192    144    
-64    144    
-64    48     
80     32     
0      32     
-16    -32    
48     -64    
48     -64    
96     32     
-32    96     
176    16     
-128   32     
0      128    
48     16     
16     80     
80     112    
128    256    
-192   48     
48     64     
112    80     
-16    96     
0      0      
32     48     
16     -16    
-352   16     
128    32     
-128   144    
144    192    
-160   -32    
-64    64     
128    0      
-16    -48    
80     16     
-32    -96    
256    -176   
128    144    
224    96     
-32    32     
32     96     
-80    -16    
144    80     
64     0      
-16    32     
-64    -32    
144    16     
-128   16     
16     208    
144    -32    
96     144    
-96    96     
80     48     
64     176    
-192   48     
-48    48     
32     112    
-112   0      
-64    -160   
32     112    
-16    48     
-48    48     
-128   96     
-240   -16    
272    144    
96     416    
-32    -32    
160    32     
0      96     
128    -112   
80     96     
256    160    
0      112    
-96    160    
-32    96     
32     0      
64     -224   
48     -64    
400    -64    
-112   -48    
80     -48    
-80    -16    
-16    -112   
32     -192   
16     48     
128    112    
64     96     
-112   0      
-144   256    
208    32     
-32    368    
224    -512   
224    128    
528    368    
160    272    
-96    576    
336    432    
-352   -16    
576    144    
80     144    
112    64     
208    0      
-160   32     
32     0      
208    192    
-16    0      
96     -48    
16     208    
-176   -704   
0      96     
-64    -80    
144    -48    
-48    -32    
368    256    
80     -48    
32     80     
32     -32    
-112   224    
160    160    
80     -144   
128    0      
32     -432   
0      0      
128    -480   
96     192    
192    160    
320    416    
-384   48     
80     32     
48     96     
208    128    
-128   80     
96     112    
-16    80     
16     -240   
0      48     
96     -288   
128    32     
144    -624   
112    96     
48     -1008  
160    144    
-176   64     
128    112    
128    96     
160    144    
-112   32     
144    -16    
0      32     
32     -16    
80     96     
0      64     
208    336    
-208   -832   
80     64     
336    288    
0      240    
-32    16     
-16    32     
208    0      
96     80     
-128   -16    
-32    -176   
16     -32    
64     -64    
256    176    
-48    -192   
224    320    
-96    224    
432    496    
-160   144    
0      -208   
-192   -96    
0      32     
144    32     
-96    64     
16     96     
48     -16    
80     96     
80     -224   
48     64     
480    176    
-80    352    
-112   128    
192    576    
-192   -896   
16     -240   
96     208    
0      320    
96     160    
16     96     
96     -1136  
-16    -48    
80     -2240  
112    16     
-16    -16    
64     96     
208    224    
-112   176    
80     0      
144    -80    
64     -1088  
144    112    
48     32     
-32    -240   
-752   -592   
48     272    
96     -144   
16     -736   
-32    96     
128    -176   
-64    -240   
192    272    
-208   -272   
-176   -576   
-176   -1120  
144    -560   
368    960    
-48    400    
0      -368   
-48    -96    
0      -176   
112    32     
64     0      
112    64     
16     224    
48     -80    
80     -80    
-32    -96    
112    -224   
0      112    
80     0      
48     48     
0      16     
128    -80    
-80    192    
144    272    
144    128    
-112   48     
96     32     
688    336    
-336   544    
16     -576   
144    -80    
-64    336    
0      -912   
-320   -1072  
128    -224   
-16    -336   
160    48     
224    432    
128    208    
-1440  48     
480    -64    
-160   176    
-144   -336   
-112   -320   
48     -336   
272    16     
-128   -2784  
-48    -384   
96     -176   
256    -144   
-48    96     
688    688    
-608   288    
-304   -608   
-496   -528   
32     -208   
-1344  -96    
-80    16     
304    -144   
32     -224   
512    256    
160    -1104  
-272   -96    
112    -304   
48     -176   
-192   288    
-112   -576   
0      96     
240    448    
-336   -176   
432    -128   
-448   -272   
80     -336   
304    96     
16     -144   
240    0      
-32    -32    
-80    -400   
176    -128   
64     448    
192    -144   
576    560    
-400   304    
-32    -336   
-128   64     
-64    -64    
-192   -64    
16     -400   
16     336    
0      -128   
640    160    
-400   -80    
0      -240   
-176   560    
32     -48    
-192   144    
32     -48    
-272   16     
128    176    
-384   208    
-144   -768   
-160   144    
176    368    
-96    -32    
32     16     
64     80     
48     -144   
-192   -96    
128    400    
0      208    
-48    80     
-80    -96    
-48    256    
80     80     
-64    112    
64     -112   
-96    -224   
624    368    
-368   112    
48     -288   
112    160    
-656   -80    
-464   32     
-112   64     
-864   -160   
-352   -272   
320    -672   
32     -352   
0      -384   
-64    16     
96     -32    
48     -48    
-832   416    
-224   -64    
-96    -240   
-16    -64    
-384   96     
240    320    
-192   288    
-448   -304   
-288   -272   
-848   128    
-32    64     
-448   96     
32     -48    
96     32     
-224   -160   
160    -48    
96     0      
-448   -320   
128    -720   
-160   -176   
128    -64    
-80    224    
-224   80     
48     48     
-400   32     
16     0      
-528   64     
0      -80    
64     -128   
0      -80    
-176   0      
80     48     
-112   -128   
80     160    
-32    128    
-192   -32    
-48    0      
16     -208   
-32    -48    
160    160    
-288   0      
-128   0      
48     128    
-1248  -48    
-80    -48    
144    -176   
16     16     
-224   -112   
96     112    
-224   160    
-32    128    
48     80     
128    144    
-144   16     
-112   0      
64     -32    
-224   16     
144    128    
-80    32     
96     96     
64     -64    
80     64     
-96    -144   
-48    32     
48     80     
-128   32     
32     0      
-96    32     
240    128    
-320   16     
160    112    
32     -16    
112    112    
-240   -16    
64     48     
-1248  -160   
-80    32     
96     112    
-144   48     
192    96     
32     16     
-48    32     
0      0      
-192   80     
48     256    
272    512    
-128   80     
-96    -320   
-336   -528   
16     128    
-1168  48     
-48    -16    
208    144    
-208   64     
-32    0      
32     32     
224    96     
-224   -16    
160    -16    
80     96     
-144   32     
-128   0      
16     96     
-16    -16    
-64    128    
-112   80     
-288   0      
176    80     
0      32     
-112   112    
16     32     
-96    -64    
32     -48    
-16    -224   
-96    -288   
-48    -96    
64     -48    
368    688    
-624   -80    
256    48     
-368   64     
-160   -80    
-80    32     
-32    48     
48     16     
-80    112    
48     0      
-176   96     
448    544    
-48    16     
96     -48    
32     96     
32     64     
-96    112    
-96    96     
16     48     
48     96     
-16    96     
-16    -80    
-96    80     
144    80     
-80    48     
16     48     
80     -16    
-112   160    
64     160    
-240   -128   
496    272    
-192   -128   
96     48     
208    144    
32     16     
-64    -32    
128    112    
-144   -32    
272    48     
-160   -48    
-80    -16    
48     160    
-128   32     
96     176    
-304   0      
80     80     
0      80     
48     80     
-16    112    
64     48     
16     224    
-32    64     
-80    48     
0      96     
-16    80     
-128   -32    
320    176    
-128   -48    
32     112    
-112   0      
64     16     
-48    16     
160    128    
-112   80     
144    224    
-80    128    
96     176    
160    48     
144    -16    
48     64     
64     64     
-32    -112   
-80    96     
80     464    
16     96     
-224   192    
128    368    
-128   0      
-96    64     
-32    32     
96     -16    
96     64     
-96    176    
80     96     
-144   -16    
-16    160    
48     144    
-272   -48    
176    -688   
-128   -272   
288    -144   
64     352    
32     320    
-32    -288   
64     368    
-16    -48    
-64    -528   
0      544    
288    240    
-112   224    
-160   -384   
304    240    
-272   192    
240    -64    
-192   -48    
256    -96    
-32    80     
224    -368   
-48    16     
-112   128    
224    48     
-80    80     
112    80     
32     112    
64     96     
16     368    
112    448    
-128   -112   
-64    192    
-144   -544   
96     -368   
144    384    
32     -288   
16     32     
464    432    
-288   368    
160    64     
-16    176    
-16    80     
224    288    
-144   -64    
32     -96    
-48    48     
0      -16    
48     128    
80     -16    
-64    32     
-32    -128   
48     0      
96     -288   
64     208    
208    128    
80     256    
-96    208    
-96    -416   
80     -112   
-48    96     
32     -16    
-176   -448   
-192   -1104  
48     -768   
16     -416   
-32    -1088  
32     -112   
192    80     
32     160    
64     -256   
32     128    
128    96     
-16    96     
144    176    
0      32     
-96    96     
176    -16    
160    80     
-160   -32    
80     -32    
32     0      
400    608    
-128   256    
0      80     
-48    -864   
256    320    
-176   128    
48     192    
16     48     
176    -80    
752    704    
-400   704    
-160   -64    
112    -464   
-16    80     
-240   -752   
-128   -48    
-16    -496   
-240   -128   
208    144    
-176   416    
0      672    
-192   -48    
-80    -288   
272    144    
-320   144    
-64    -320   
288    480    
-384   192    
-160   -464   
368    -192   
0      560    
160    672    
-96    -272   
16     -176   
-96    128    
-32    -32    
304    112    
48     16     
-144   192    
-112   -400   
96     -336   
176    848    
16     400    
-160   -160   
128    -80    
-64    144    
560    368    
-96    336    
48     -192   
-16    -1184  
128    -240   
192    320    
224    944    
-288   336    
64     -576   
80     -48    
176    -416   
-64    128    
-48    80     
288    -144   
-272   16     
64     -112   
16     96     
48     -544   
272    80     
-160   368    
-144   48     
128    112    
-944   -32    
176    -384   
-256   -416   
176    -112   
-96    -80    
-32    32     
80     -224   
48     112    
128    -336   
144    -224   
64     64     
96     -224   
32     80     
-16    112    
112    32     
-512   -48    
192    -96    
-48    0      
-32    -144   
32     0      
272    -144   
-64    16     
192    -1248  
144    96     
-48    0      
-32    -16    
192    -96    
-80    -64    
112    -96    
400    112    
-448   112    
208    320    
-848   64     
-48    -128   
160    -176   
176    -240   
112    -208   
-96    -736   
0      32     
-32    -240   
16     192    
-48    -16    
-64    16     
0      80     
80     -16    
-112   16     
96     0      
-352   -16    
-48    -64    
96     0      
80     0      
-128   -128   
224    -144   
80     48     
112    -928   
16     80     
-32    -80    
16     48     
64     32     
-32    -112   
-96    64     
112    -176   
-336   16     
96     64     
-352   64     
272    128    
32     128    
96     -256   
-96    -96    
96     -848   
-32    160    
144    0      
-32    -32    
80     32     
-80    -256   
-64    -80    
32     -96    
-64    48     
0      -96    
-304   80     
176    -160   
-1008  -112   
32     -256   
-16    32     
0      -480   
176    64     
-64    0      
64     288    
16     96     
208    128    
-224   -64    
240    128    
32     32     
-64    32     
-208   -32    
64     -96    
32     16     
-16    -192   
128    96     
224    -16    
-96    80     
-64    48     
64     192    
-80    96     
-48    -48    
-112   32     
208    -16    
-128   -16    
96     -64    
-32    128    
368    -48    
-336   144    
80     -288   
-160   112    
-64    -288   
0      128    
-112   -64    
-80    0      
32     0      
192    80     
-64    -80    
-192   0      
192    48     
-96    48     
-208   64     
144    48     
-16    224    
-432   -320   
192    -80    
-1040  -304   
-144   -128   
80     -16    
-160   -64    
16     0      
-688   80     
-176   64     
-16    0      
-64    64     
192    112    
-192   160    
224    -80    
-208   -64    
-224   -112   
32     80     
-64    -128   
-144   -32    
-32    128    
-336   -32    
16     80     
-512   -64    
-16    16     
-144   16     
16     144    
80     -32    
-64    16     
-112   -160   
208    192    
-16    -80    
64     0      
448    464    
-496   0      
48     -176   
-240   112    
48     -80    
-176   -48    
96     128    
-352   -16    
-16    16     
-400   -64    
-32    80     
-416   -64    
240    48     
128    128    
16     48     
-224   -80    
144    0      
-48    64     
-32    48     
-96    64     
80     -16    
-16    96     
-192   64     
-160   32     
-1056  -96    
48     112    
208    144    
-160   32     
-16    32     
144    -64    
-176   -176   
272    128    
-80    48     
-64    -16    
176    144    
96     112    
-448   64     
-80    -32    
-448   112    
288    0      
-304   208    
64     112    
64     64     
352    384    
-288   400    
-224   96     
64     -80    
-16    -224   
-16    -208   
32     48     
112    64     
-160   144    
48     128    
-64    -16    
-160   -144   
128    80     
-672   -144   
128    16     
-48    96     
128    144    
-16    32     
-128   -160   
160    64     
32     64     
64     0      
-80    -96    
144    -208   
208    224    
128    -32    
-160   208    
80     272    
-320   160    
-192   -480   
256    336    
-304   -64    
176    -64    
32     240    
-160   -48    
272    96     
-144   -144   
160    288    
-160   -352   
48     0      
0      256    
-160   0      
80     -144   
-64    16     
0      -16    
144    144    
-128   96     
96     32     
-160   80     
48     -32    
64     32     
0      -16    
-80    320    
80     -80    
-160   96     
112    224    
-176   64     
336    336    
-432   144    
-48    80     
-176   32     
192    64     
0      32     
-64    80     
32     48     
-16    80     
48     48     
-32    80     
16     48     
32     32     
32     112    
-32    48     
-112   -224   
192    -32    
-16    160    
16     112    
-48    224    
176    0      
32     0      
0      128    
-32    -32    
0      64     
-32    224    
32     144    
-64    16     
80     160    
-128   -48    
-208   -64    
272    -16    
-32    64     
128    80     
-64    64     
-32    -80    
-64    -128   
-48    64     
32     96     
16     112    
0      80     
224    96     
-32    -64    
96     96     
-144   16     
176    128    
112    64     
-32    48     
-240   -640   
-112   -688   
144    272    
-240   80     
-112   -336   
16     -32    
0      192    
-96    -64    
64     176    
-96    -48    
80     160    
48     64     
96     64     
0      48     
144    48     
-160   48     
144    96     
-16    64     
144    144    
208    592    
224    656    
-96    320    
-80    -368   
64     -144   
-96    -32    
128    -16    
-80    208    
0      -128   
112    -64    
-656   -352   
-464   -1328  
688    240    
-400   1152   
16     -400   
64     128    
-192   192    
-64    -160   
48     80     
352    192    
-224   272    
48     -112   
64     176    
-48    -2256  
-32    112    
160    64     
-192   -240   
192    400    
96     352    
-160   -192   
48     48     
-128   -160   
80     64     
80     80     
176    224    
-16    -16    
-64    -80    
128    144    
96     -144   
160    64     
-16    -160   
-240   -368   
192    208    
-96    384    
-64    48     
96     80     
-48    160    
288    224    
-96    -96    
-32    32     
288    144    
-48    -48    
512    544    
-560   160    
224    -80    
-64    -112   
176    48     
-144   -160   
272    -48    
-320   -96    
416    48     
-448   -336   
432    160    
-96    32     
-160   64     
-16    -192   
480    -160   
-96    224    
192    -816   
-48    176    
512    -1136  
-688   64     
96     -64    
-32    64     
80     -64    
48     96     
32     16     
-32    112    
112    0      
-80    -224   
80     -32    
64     -128   
-32    64     
16     -48    
208    96     
-16    -32    
16     -128   
-48    -560   
192    176    
-240   -16    
128    112    
128    208    
192    64     
32     112    
-16    -96    
80     0      
-64    -64    
272    -32    
-64    256    
192    128    
48     -304   
0      64     
32     -592   
-208   48     
80     48     
80     256    
-16    96     
16     64     
144    96     
-32    -176   
-80    32     
-16    -96    
32     32     
64     16     
80     48     
64     -272   
64     64     
-64    -368   
-16    96     
-112   128    
240    176    
-160   -32    
80     144    
128    96     
128    -32    
16     96     
160    16     
32     256    
-112   -48    
224    16     
-48    96     
240    64     
-80    -48    
192    32     
176    -64    
368    -1200  
-272   48     
-16    -128   
128    -1088  
128    -64    
48     -544   
208    48     
-208   64     
48     -96    
160    192    
-112   -304   
-80    64     
304    -192   
16     -1344  
0      -208   
-144   -576   
240    160    
-864   64     
224    0      
-16    -64    
112    112    
48     -144   
-48    -736   
144    -16    
64     144    
176    -32    
-128   -176   
48     16     
-16    -272   
0      -144   
176    -16    
112    176    
-64    80     
0      -400   
80     16     
-80    -768   
16     32     
112    -160   
-160   0      
96     -224   
160    0      
-112   -144   
64     32     
48     -16    
192    -48    
128    144    
0      -192   
-400   0      
64     -224   
-1200  -64    
96     -240   
-64    -48    
64     -304   
240    -64    
-192   -1856  
0      80     
96     -80    
16     80     
80     -48    
160    112    
-240   -128   
-16    -64    
-272   -192   
208    80     
-288   64     
32     16     
160    -80    
32     0      
128    0      
-16    16     
64     112    
48     -400   
64     80     
128    -240   
-176   80     
176    -96    
-48    -32    
112    80     
144    160    
-304   -208   
208    -256   
-16    -128   
288    -32    
-144   32     
256    -144   
32     80     
160    -800   
-32    32     
112    16     
0      -160   
80     -240   
144    16     
-64    -48    
160    64     
-528   -224   
208    -48    
-320   -16    
32     -16    
-16    -80    
208    -144   
-128   32     
160    -608   
96     128    
272    -16    
-304   -176   
288    -80    
320    160    
-208   -32    
-144   -16    
-32    -288   
48     -128   
256    368    
-128   32     
176    112    
96     -176   
0      32     
128    -192   
-16    112    
64     64     
-48    -64    
-224   -16    
-16    -320   
96     -112   
304    32     
-240   320    
160    -48    
-160   -112   
256    -96    
-144   -144   
16     -176   
128    112    
64     80     
-16    32     
-176   -64    
-128   -512   
-144   -336   
112    -176   
32     -80    
32     32     
128    128    
112    -32    
-176   176    
368    640    
32     -16    
0      -320   
48     -176   
-1472  -336   
128    144    
-16    80     
-736   128    
-144   160    
96     -64    
80     0      
-96    16     
-144   -16    
144    256    
-240   -112   
-320   32     
-32    16     
-432   -592   
-48    224    
-304   -80    
-272   -16    
-80    80     
80     64     
0      64     
-176   -48    
-32    48     
-144   -288   
160    -160   
-128   -112   
-96    -464   
-192   -512   
224    464    
80     416    
48     288    
-64    -48    
80     -32    
16     240    
-80    -112   
0      112    
-96    -32    
64     176    
-16    96     
-176   -112   
192    -48    
-144   0      
-48    -32    
16     32     
-80    -256   
128    -80    
368    480    
-176   576    
-96    48     
-64    -112   
-64    96     
160    0      
-240   80     
288    64     
-192   0      
-256   -32    
176    80     
-160   -32    
64     64     
32     80     
-32    0      
-16    64     
-80    0      
224    176    
-384   -192   
160    96     
144    224    
32     320    
-224   96     
-16    -16    
-608   -32    
-32    32     
64     -32    
144    160    
-192   -16    
-48    0      
-128   48     
-16    -32    
32     80     
-48    32     
64     96     
-144   -160   
-64    -48    
-144   -64    
-32    64     
-320   -16    
96     176    
336    160    
112    752    
-64    320    
-64    16     
-80    128    
0      96     
16     -64    
-32    -128   
32     160    
832    880    
-272   1408   
112    768    
64     480    
-48    16     
128    -160   
-864   -208   
144    96     
-64    240    
80     80     
0      -80    
-240   80     
432    496    
-592   -752   
144    -256   
-16    192    
160    112    
-64    96     
-96    48     
-336   -1120  
432    -96    
-736   928    
64     -304   
0      -48    
160    176    
192    128    
-128   32     
-48    64     
16     464    
-160   112    
-112   -352   
48     -112   
-256   0      
208    560    
-320   -64    
-48    -176   
-96    -288   
16     48     
128    256    
-32    176    
64     64     
-32    80     
144    560    
160    240    
-128   32     
128    128    
16     80     
-208   0      
64     64     
-32    -16    
-32    64     
208    272    
-48    160    
16     -16    
16     32     
256    240    
-176   144    
0      144    
64     64     
-64    -48    
256    608    
-32    672    
-384   352    
224    48     
-160   48     
320    304    
-432   16     
192    64     
-112   32     
128    192    
-192   -32    
16     16     
32     -16    
-144   0      
-32    48     
-48    32     
176    112    
-240   16     
112    32     
-112   144    
-128   -32    
48     -208   
0      32     
272    144    
-128   64     
-64    32     
224    32     
560    592    
-896   -128   
336    224    
-128   208    
64     32     
-208   -48    
144    16     
-176   -16    
-48    64     
112    64     
-96    96     
32     -16    
-160   96     
32     80     
-48    96     
32     48     
-16    160    
-32    48     
-288   -112   
384    -16    
-80    64     
192    96     
-96    112    
304    224    
-240   48     
80     0      
144    0      
-48    128    
128    64     
-96    96     
176    112    
128    112    
-96    -48    
16     144    
160    64     
-96    -112   
160    96     
0      64     
64     16     
-80    64     
32     80     
48     -48    
80     64     
128    48     
192    272    
-176   80     
-176   48     
64     64     
-112   -144   
192    80     
176    80     
0      -48    
448    384    
-432   -656   
192    48     
-176   64     
96     112    
0      48     
-80    0      
144    16     
0      144    
48     32     
-32    -16    
48     208    
80     48     
-128   -16    
-112   -240   
48     128    
-128   -304   
48     80     
80     80     
32     64     
208    48     
-448   128    
256    112    
-160   64     
0      48     
176    80     
-240   -32    
160    80     
80     160    
-64    -480   
32     16     
448    272    
-368   112    
64     -2176  
32     96     
112    160    
-112   -32    
32     -48    
128    112    
0      16     
-80    80     
144    112    
16     0      
80     112    
160    32     
-48    96     
192    0      
-64    192    
-32    -320   
224    336    
-48    -208   
160    176    
48     32     
80     32     
-32    32     
144    64     
48     96     
112    16     
80     112    
48     -240   
-144   160    
224    -320   
-80    80     
144    -160   
-112   80     
224    -480   
-96    160    
208    -32    
-64    -16    
208    48     
80     144    
128    48     
32     -16    
32     16     
-16    -192   
-128   272    
192    -64    
16     -16    
176    -80    
-176   176    
-48    -464   
240    48     
-80    64     
112    96     
-160   -32    
144    0      
160    -112   
-16    -288   
336    224    
-128   -192   
64     -112   
240    -288   
384    320    
-64    144    
-160   192    
80     -176   
128    128    
112    16     
96     352    
-256   -336   
80     160    
128    64     
-96    -64    
-32    0      
64     -336   
464    144    
-176   -96    
80     64     
32     -336   
224    224    
240    128    
112    -656   
-128   64     
64     -944   
-160   112    
-144   -96    
64     272    
-64    -48    
112    -352   
-176   128    
-48    -560   
-96    32     
192    176    
-80    160    
128    336    
256    400    
-208   -544   
416    128    
-160   -384   
64     -192   
-160   -64    
112    -112   
0      -16    
32     -192   
208    0      
-16    -256   
176    416    
128    288    
96     80     
16     -528   
16     -304   
304    48     
-288   96     
192    96     
96     16     
-656   208    
368    288    
-96    -112   
64     -208   
-32    -288   
352    208    
-80    96     
64     -720   
224    -272   
192    -32    
64     640    
-176   48     
32     -752   
224    256    
-208   -96    
-96    80     
-32    -32    
-800   -400   
96     192    
-128   512    
112    -624   
-32    -480   
128    448    
288    704    
-144   80     
-144   -544   
-48    -272   
176    -240   
-64    32     
-80    -80    
-64    -32    
-64    -16    
-208   0      
320    16     
-80    -48    
80     -224   
-176   -32    
128    -32    
-16    160    
-32    -496   
-32    144    
-160   -192   
-256   -512   
320    -64    
-208   144    
80     -32    
-192   -480   
-64    -64    
64     -32    
-416   32     
96     -144   
-32    144    
16     -176   
80     272    
32     -544   
16     -48    
0      -160   
112    0      
-64    -32    
128    -80    
-144   -48    
112    192    
-272   176    
16     48     
-368   176    
0      112    
256    128    
-96    -336   
144    208    
304    -352   
-336   0      
160    64     
32     48     
-16    80     
48     -48    
240    -32    
64     -96    
-64    64     
288    112    
-272   -192   
80     -256   
48     -64    
368    32     
96     352    
176    -80    
176    144    
0      96     
224    176    
-384   160    
0      192    
-288   -80    
0      -80    
32     80     
-144   48     
-272   -1104  
240    48     
-48    448    
-368   -192   
240    48     
80     160    
-224   336    
64     112    
-48    272    
-128   -160   
96     16     
-96    144    
-48    -256   
0      -576   
256    240    
-96    -272   
112    272    
-32    576    
-96    -752   
-32    192    
-208   256    
-160   -112   
-160   -144   
-576   224    
-80    208    
-192   -240   
-64    -144   
128    64     
48     384    
-224   -1024  
-32    -208   
-112   32     
-144   448    
160    48     
-16    16     
-32    -48    
-688   368    
240    240    
-192   -32    
-128   208    
-96    -64    
-128   48     
-1744  16     
-112   320    
80     80     
16     -144   
-112   -192   
384    288    
-144   144    
32     144    
80     272    
-112   96     
96     80     
-80    0      
32     -16    
48     16     
-208   -32    
48     128    
-16    -64    
16     48     
160    240    
-96    0      
-16    160    
160    304    
-224   256    
64     208    
-112   -96    
112    128    
-320   -16    
336    -48    
-352   96     
192    16     
-256   64     
64     96     
-768   -96    
-128   160    
224    -96    
-160   96     
16     208    
144    -240   
-128   -160   
208    -192   
-384   -416   
-160   -320   
-208   64     
0      96     
-176   144    
-240   64     
64     144    
-608   -112   
96     48     
-96    -128   
-48    -112   
128    16     
16     -16    
288    -16    
-224   240    
272    224    
-160   144    
240    192    
-176   -16    
16     32     
-128   96     
-16    160    
-272   -64    
-192   0      
-240   128    
-336   112    
128    240    
-240   96     
64     144    
-160   32     
-48    -144   
32     -208   
-96    -384   
-48    -192   
-192   -96    
-208   48     
64     64     
-288   -16    
144    80     
-192   -160   
-80    0      
-128   112    
16     -32    
-32    -16    
-160   -224   
400    -64    
-80    64     
-16    -16    
-32    0      
112    32     
-32    -48    
112    112    
-304   -48    
64     64     
-112   -64    
0      64     
-64    -16    
-48    144    
144    48     
-96    32     
0      -16    
0      -128   
-64    -48    
64     64     
16     96     
16     -64    
80     208    
160    64     
-96    96     
0      96     
48     -16    
96     32     
112    96     
-32    80     
-32    80     
128    80     
-48    48     
96     112    
-208   -80    
-64    16     
-128   -160   
144    -80    
-32    64     
240    240    
-192   48     
208    208    
-176   48     
80     96     
-144   48     
48     16     
160    112    
-208   64     
160    80     
-272   -32    
-144   48     
96     -128   
160    176    
-160   48     
-32    16     
64     -128   
0      192    
-32    32     
80     112    
-32    32     
288    240    
-176   96     
16     128    
64     64     
-48    -128   
160    160    
-144   0      
0      64     
-128   48     
-64    -48    
-96    16     
80     64     
16     128    
96     96     
-16    16     
-16    64     
80     16     
-48    48     
48     32     
-16    -96    
96     -32    
0      48     
80     128    
-64    16     
-32    -16    
208    -64    
128    96     
-80    192    
-80    240    
0      0      
-48    32     
288    240    
-192   192    
-272   304    
128    224    
32     464    
-192   112    
-128   32     
256    64     
0      -144   
-64    -128   
16     -144   
16     16     
-64    48     
128    144    
-32    -208   
112    -32    
0      16     
144    240    
-112   16     
48     80     
16     336    
-144   272    
128    256    
16     32     
-16    -160   
48     64     
-96    240    
0      -32    
-112   -352   
32     176    
-64    -496   
128    208    
-16    544    
-80    -400   
48     -240   
112    144    
-128   -192   
-48    -48    
-80    -1344  
48     336    
-32    240    
32     -16    
-32    -16    
48     64     
96     0      
-320   192    
144    96     
-16    -96    
-80    -160   
64     560    
32     144    
-32    -224   
112    192    
48     -224   
-32    0      
112    16     
48     176    
544    448    
-208   416    
-96    368    
16     -192   
0      128    
-128   80     
-112   -112   
16     144    
64     80     
64     -96    
128    -560   
32     176    
128    640    
32     -496   
96     176    
-80    -384   
384    352    
112    512    
-144   -64    
192    80     
16     80     
816    784    
-1280  -976   
320    -736   
112    240    
320    176    
-96    -448   
-192   -224   
-16    -912   
-448   32     
592    -192   
-96    704    
48     -64    
240    -224   
128    304    
-32    -16    
80     0      
208    -272   
-48    448    
96     -704   
128    208    
160    -816   
16     -176   
448    352    
-368   -176   
64     -544   
64     32     
-128   -112   
160    160    
-160   -208   
496    -80    
0      928    
192    -240   
336    -272   
288    -16    
-128   96     
160    -80    
176    144    
96     -96    
32     48     
-16    -64    
176    112    
-48    0      
96     96     
32     64     
96     0      
-64    -176   
208    352    
-208   352    
176    -32    
32     112    
160    224    
96     48     
0      -96    
176    -32    
-112   -608   
144    0      
80     288    
160    -736   
-64    -272   
192    544    
-80    -192   
-64    -224   
224    -80    
-16    -96    
192    224    
-272   -288   
256    -448   
-64    80     
464    544    
-176   144    
-160   -256   
80     -480   
-64    -528   
-160   -320   
-720   -224   
-16    -272   
160    -16    
-96    -96    
224    -48    
16     -496   
48     -128   
96     80     
16     48     
32     96     
-16    48     
144    96     
-112   0      
112    -256   
-128   -816   
-224   64     
208    256    
-80    -112   
336    -304   
0      -32    
160    144    
128    -160   
-64    64     
208    80     
-96    0      
64     32     
304    64     
-416   -272   
96     -208   
16     -272   
-352   -240   
112    0      
128    144    
352    240    
-112   48     
16     144    
192    128    
0      -16    
48     -32    
240    -64    
-48    224    
80     32     
416    400    
-64    624    
224    448    
-272   -16    
-16    -112   
-528   -64    
48     -128   
96     -224   
96     -240   
160    -112   
160    -928   
-352   16     
96     320    
0      64     
96     0      
64     112    
16     128    
-96    80     
-160   16     
192    -32    
-16    48     
-112   16     
64     -48    
-96    -512   
-112   -320   
144    -128   
-208   64     
176    -736   
32     80     
-48    -320   
400    -256   
-192   48     
336    64     
-432   64     
160    80     
-272   64     
-64    -16    
-736   64     
64     0      
-832   32     
256    128    
-192   0      
160    -96    
-112   80
[truncated: 122,011 more chars]
