# Supplementary material for: A Fault Diagnosis Method for One‐Dimensional Vibration Signal Based on Multiresolution tlsDMD and Approximate Entropy
Source: Hindawi journal article supplement (doi:10.1155/2019/3262818), 2019-01-01
Supplement: f1 [file 3262818.f1.zip › 3262818.f1/gear signals/wear gear signal/Data13.txt]

-48    64     
-144   64     
-128   96     
-32    0      
-160   48     
-592   -32    
-112   32     
-464   -48    
-64    -32    
-240   -96    
288    128    
-272   -48    
-32    -80    
-48    96     
48     32     
-160   0      
-16    64     
160    208    
-304   80     
-48    -16    
-288   -176   
-112   64     
-192   192    
-208   112    
-112   -80    
304    64     
-112   -64    
-96    -240   
-176   64     
224    144    
-256   16     
80     16     
-16    -48    
-128   80     
176    32     
-128   48     
64     96     
-448   32     
64     80     
-48    -16    
368    480    
-464   208    
16     -48    
16     80     
-32    48     
-192   16     
-48    16     
16     80     
-160   -64    
112    -16    
-96    32     
48     240    
-448   -32    
32     -16    
-32    112    
112    96     
-288   80     
-64    16     
-112   96     
272    208    
-288   208    
16     64     
48     0      
48     80     
-160   -128   
-128   -48    
48     -128   
-144   -128   
80     128    
-592   224    
-224   0      
48     -16    
-80    -48    
64     48     
-80    32     
-48    -80    
32     0      
240    464    
-128   192    
-32    96     
16     144    
-48    -96    
32     0      
368    336    
-592   272    
-176   -128   
-96    368    
224    80     
-128   144    
16     80     
-96    176    
128    336    
-224   128    
80     176    
-80    -144   
48     80     
-16    272    
-272   -48    
-32    0      
16     160    
-64    -288   
176    -288   
80     288    
48     240    
0      112    
208    80     
-144   16     
0      -112   
16     384    
64     272    
-64    -16    
-144   -448   
-64    -160   
-64    192    
-112   -544   
240    736    
48     288    
-176   -304   
384    528    
-624   -752   
112    -16    
-160   96     
112    160    
-32    32     
80     272    
-320   -352   
208    -192   
112    560    
-160   160    
192    -288   
64     224    
-96    320    
80     -16    
-32    64     
48     192    
-80    432    
128    -128   
-128   96     
-368   176    
96     -288   
-272   256    
64     -480   
-128   80     
16     176    
96     16     
0      96     
176    -48    
96     160    
320    256    
-64    288    
-80    176    
80     -112   
64     80     
128    0      
-432   -464   
496    -736   
304    352    
240    688    
-128   256    
64     144    
176    720    
16     512    
-128   -224   
112    -368   
-80    16     
-112   288    
64     -16    
-288   160    
64     0      
-160   32     
-48    -112   
-64    -304   
-32    16     
320    160    
-96    224    
0      -16    
224    -624   
-512   -128   
352    144    
32     896    
-64    160    
176    -480   
-128   464    
-32    -16    
176    256    
-288   288    
368    -384   
-288   -80    
608    176    
-528   416    
96     -224   
-16    -192   
-128   176    
224    -352   
-16    -64    
176    384    
32     80     
192    -96    
-128   432    
48     -400   
240    80     
-16    160    
32     32     
144    -400   
-64    -144   
-64    0      
240    -96    
-48    352    
96     48     
-96    16     
96     128    
16     -16    
64     128    
-80    -64    
176    304    
0      -224   
240    256    
16     352    
0      -192   
112    -1456  
304    368    
-320   480    
32     -640   
288    720    
-304   16     
448    704    
-208   288    
-208   -464   
608    256    
-400   416    
272    256    
176    -384   
-144   80     
192    -336   
0      0      
-32    -1024  
0      -320   
176    288    
32     144    
32     368    
0      -32    
80     64     
-96    112    
-32    -320   
112    208    
-112   128    
-96    -64    
112    96     
96     -80    
32     112    
48     -288   
32     48     
32     -384   
-128   -256   
160    48     
64     528    
224    352    
96     432    
-144   208    
112    -336   
-96    16     
-48    144    
160    144    
-48    0      
-32    288    
16     -512   
128    192    
-48    -176   
144    240    
32     -112   
16     80     
176    0      
-48    32     
16     80     
160    80     
-48    112    
16     -128   
272    32     
-160   -400   
80     128    
64     -96    
128    80     
0      112    
96     112    
-16    96     
96     32     
192    -16    
-176   96     
256    -48    
64     -48    
128    64     
-32    -336   
144    -128   
96     -144   
176    128    
80     -32    
32     32     
-16    32     
240    128    
-320   -16    
240    112    
-112   16     
160    -16    
176    -544   
-32    -240   
-208   0      
16     -352   
192    128    
-128   208    
304    288    
-192   -176   
160    160    
-128   -112   
224    -240   
48     -32    
96     -240   
160    -32    
32     64     
80     64     
-16    -80    
-48    -400   
144    -96    
128    -480   
64     -128   
128    80     
-16    -224   
176    -368   
128    128    
32     352    
208    144    
-32    -464   
80     -624   
-48    -48    
-16    -320   
192    -288   
-128   -336   
192    -80    
-64    -368   
48     -112   
64     32     
-96    32     
80     -16    
-80    -64    
336    80     
-176   64     
-16    80     
32     224    
-144   384    
192    1152   
304    928    
-176   -64    
-64    -240   
160    -560   
128    176    
0      -816   
240    -352   
176    -400   
64     112    
336    -144   
16     144    
144    -128   
48     -144   
-48    -48    
112    -48    
-1536  0      
-160   -336   
48     -208   
-96    -128   
64     32     
48     0      
208    48     
176    -640   
0      0      
64     -112   
-96    -144   
192    64     
224    48     
-352   -144   
-416   -176   
-80    -112   
-16    -32    
112    64     
-112   0      
64     80     
-32    -448   
-96    64     
192    -1792  
-80    -96    
256    16     
-144   32     
-16    -32    
64     32     
-336   -240   
416    -64    
0      32     
112    -64    
-288   64     
192    -16    
-192   -128   
96     -192   
176    96     
-96    -448   
240    192    
-64    -48    
0      -16    
192    96     
-112   -544   
-32    -16    
16     80     
-192   -32    
96     32     
-928   -112   
128    -128   
64     32     
176    48     
-16    144    
-48    -192   
48     96     
64     -16    
64     16     
-32    48     
-96    -32    
-144   -64    
48     -144   
-64    64     
240    -80    
-96    112    
-32    80     
-112   -32    
16     -128   
80     48     
32     -384   
80     -144   
-240   112    
112    112    
32     -64    
-80    -80    
144    64     
144    -32    
-176   64     
176    -64    
-192   112    
192    -16    
-112   64     
-272   -96    
256    128    
-544   -304   
-384   32     
-32    48     
-272   208    
-320   96     
176    0      
-208   208    
272    192    
-96    192    
192    192    
-112   -208   
-576   -640   
112    -144   
-640   -416   
64     32     
256    352    
-752   16     
16     -224   
-80    -48    
-96    64     
-1360  -464   
64     160    
80     176    
0      48     
80     -48    
176    336    
-240   -320   
32     -64    
-32    96     
48     176    
96     48     
-160   368    
64     -704   
-320   592    
-240   -176   
16     -1152  
0      32     
-816   -32    
-144   400    
-32    160    
-96    -112   
-16    -112   
-128   160    
-192   -240   
48     -16    
-128   112    
128    32     
-240   48     
16     48     
-16    64     
-112   -400   
-112   112    
-32    0      
-128   0      
0      80     
-48    96     
-80    0      
128    112    
-384   -288   
144    -448   
-64    96     
64     128    
64     176    
-144   32     
64     0      
-176   -32    
0      160    
-192   -304   
0      96     
-352   112    
32     -16    
0      -96    
80     -32    
64     96     
160    128    
-352   -32    
80     144    
-464   32     
-16    -128   
160    80     
-208   -208   
80     0      
-144   64     
-224   48     
-448   -144   
0      32     
80     -112   
384    256    
-64    192    
-176   16     
112    -64    
96     -160   
0      -64    
-16    96     
128    -32    
-16    96     
64     208    
-272   -176   
-32    -464   
-208   160    
240    480    
-464   80     
-176   144    
128    112    
-64    -160   
-112   32     
160    192    
272    464    
-352   -192   
48     96     
16     32     
-288   -128   
-224   48     
128    208    
-160   144    
32     -80    
-880   416    
-64    -32    
-80    -64    
-224   -320   
-160   128    
0      80     
-96    64     
-96    224    
240    -224   
-112   208    
-128   272    
-160   -544   
-272   -816   
-112   -320   
144    736    
-128   -96    
-128   192    
464    272    
-368   416    
288    -32    
-304   96     
928    656    
-432   1072   
-144   -880   
304    128    
64     480    
-112   -304   
64     -160   
-176   96     
32     112    
32     96     
-32    -128   
-64    592    
464    432    
-304   176    
112    -176   
96     176    
0      592    
-144   -496   
-112   -416   
208    368    
-96    416    
64     384    
-112   -80    
-112   -64    
192    128    
-112   272    
128    32     
-16    112    
96     416    
32     16     
-144   -240   
224    448    
64     576    
-176   48     
64     48     
-32    -240   
64     -64    
336    512    
-256   224    
208    112    
64     64     
-32    48     
0      -128   
96     256    
80     96     
-32    160    
240    144    
32     224    
-208   320    
32     160    
64     208    
0      80     
224    96     
16     112    
-80    80     
112    -16    
-32    -48    
48     32     
208    176    
-240   -32    
288    256    
-432   208    
0      32     
0      -80    
112    128    
16     272    
0      256    
0      0      
32     48     
64     -16    
-208   -16    
176    96     
-144   80     
48     96     
-128   32     
80     32     
-224   -32    
112    16     
-32    80     
96     64     
-144   -32    
16     -512   
-32    160    
160    64     
0      144    
16     80     
-32    160    
-64    160    
64     -16    
48     -48    
192    224    
-16    80     
64     80     
16     -16    
176    128    
-96    -32    
48     0      
16     -32    
112    -864   
48     144    
-32    112    
64     16     
48     112    
144    64     
-48    80     
80     128    
-64    112    
176    -80    
-160   -192   
0      80     
-64    -16    
48     -176   
208    -48    
-32    -992   
80     80     
-32    -64    
112    -64    
64     -80    
0      272    
64     256    
96     240    
-128   -128   
-48    176    
-160   64     
-80    -112   
192    -48    
112    -80    
16     176    
-80    -368   
16     -96    
160    -160   
160    -112   
-16    -224   
64     -16    
96     64     
-96    192    
-16    96     
64     304    
-144   112    
-16    -128   
-80    80     
112    -112   
-144   -16    
112    -96    
0      16     
320    320    
-384   208    
48     -528   
-112   -48    
16     -160   
0      96     
160    16     
32     144    
48     160    
-16    -32    
128    96     
-96    -272   
-48    144    
-80    -176   
224    208    
-144   -560   
32     32     
320    -1168  
-48    176    
-16    -144   
0      -48    
240    32     
48     176    
-32    -208   
0      -112   
208    336    
-240   -96    
176    64     
224    -128   
-112   48     
-64    -544   
64     96     
176    -144   
-176   -80    
320    256    
16     80     
16     80     
192    144    
48     16     
144    32     
128    80     
-16    -64    
160    112    
0      -272   
112    128    
48     -32    
144    128    
128    0      
-48    96     
-48    16     
144    16     
80     32     
48     -16    
96     208    
160    -48    
-208   -16    
96     -64    
256    112    
-96    -176   
-128   -48    
336    -208   
-16    144    
64     -544   
96     -2352  
-16    16     
0      -240   
128    80     
0      -112   
144    -192   
112    -176   
-128   -1168  
160    -112   
32     240    
-192   -128   
112    -48    
192    -112   
128    -1200  
-80    16     
96     -624   
0      32     
64     112    
304    -368   
48     -160   
128    -464   
128    -80    
-16    -448   
256    288    
-32    144    
-64    16     
80     64     
208    -48    
80     -96    
32     160    
112    32     
16     80     
80     -128   
48     -128   
-128   -64    
-48    -160   
240    16     
80     -224   
-272   -704   
320    -624   
64     304    
-144   -752   
256    -576   
32     368    
80     16     
-48    -112   
64     64     
-192   -16    
64     32     
-96    48     
32     16     
-400   -32    
64     48     
80     -16    
80     -176   
176    32     
16     128    
48     336    
592    496    
-416   -336   
160    -320   
0      -64    
16     16     
144    -32    
32     64     
144    80     
-400   -128   
240    32     
0      96     
128    -32    
272    592    
64     832    
-208   192    
192    -816   
-48    192    
-16    -160   
48     0      
-96    -16    
192    -64    
-256   192    
0      -336   
-592   -320   
32     -32    
-144   80     
96     48     
-64    96     
-16    -256   
0      -176   
-96    -1296  
-64    -160   
-16    -336   
208    -48    
-256   112    
192    80     
-160   0      
80     0      
-240   16     
192    96     
-416   -32    
304    -112   
-80    48     
224    -304   
-128   64     
128    -240   
-16    80     
32     48     
32     -48    
-304   -176   
128    -624   
-128   -160   
128    80     
-176   -112   
48     -128   
-128   80     
192    -32    
80     432    
64     224    
-112   224    
208    240    
160    144    
-240   -224   
96     -208   
128    -112   
-96    32     
96     128    
-176   224    
16     80     
-192   -48    
-256   64     
64     -368   
-80    64     
16     -240   
-64    -16    
320    -336   
-128   -112   
16     480    
512    -80    
-64    176    
32     224    
-160   -576   
128    176    
-176   -80    
80     -48    
-32    240    
16     80     
96     48     
-608   -208   
-272   16     
-160   0      
-944   288    
-160   -144   
-192   -64    
-160   0      
-144   -176   
-112   0      
288    160    
-144   416    
-16    -432   
-64    -544   
-160   304    
-288   -272   
-256   -464   
80     128    
-32    288    
-96    336    
-304   -400   
-352   208    
-32    288    
-736   32     
0      32     
-960   208    
64     624    
16     224    
-464   -80    
48     128    
-64    176    
32     496    
544    592    
-80    192    
112    -64    
-32    80     
-128   -224   
-416   -256   
176    -16    
112    224    
-592   144    
-240   16     
32     -192   
-224   -384   
-224   -288   
144    16     
-64    -64    
64     -32    
0      32     
-144   -48    
-64    48     
224    80     
32     96     
-48    -112   
-144   -64    
-16    -160   
-16    80     
-1264  -112   
-16    -112   
176    16     
336    240    
-192   -112   
144    304    
144    176    
-384   16     
144    16     
-80    16     
-16    80     
-144   -128   
-176   16     
-64    -112   
-192   -32    
-272   -432   
320    -32    
-16    -48    
272    112    
-160   0      
64     96     
-16    16     
48     128    
192    240    
-144   80     
-128   32     
-48    -96    
64     80     
176    48     
-48    16     
64     -80    
-16    96     
128    -16    
32     32     
-128   48     
128    64     
16     176    
-144   -48    
-128   112    
176    64     
-16    -16    
32     48     
64     160    
-240   96     
224    32     
-240   -16    
208    416    
-144   -160   
-64    48     
176    208    
-96    32     
-96    32     
96     160    
-80    64     
-96    32     
112    16     
-144   0      
0      80     
-336   -80    
112    16     
-224   -80    
96     64     
-48    64     
32     128    
112    48     
-112   64     
128    176    
48     80     
-80    32     
144    64     
-32    0      
-64    32     
-160   -128   
80     32     
112    0      
-128   32     
112    112    
-64    128    
-16    64     
0      32     
48     112    
-112   144    
32     96     
-112   -96    
64     -16    
112    96     
-416   -64    
176    -80    
-80    0      
32     128    
-96    16     
-176   80     
48     112    
-16    128    
-16    32     
128    -160   
-64    -64    
16     112    
-48    192    
-80    160    
128    112    
-176   -16    
144    16     
-48    0      
80     32     
-144   48     
16     208    
64     208    
32     32     
-32    80     
240    48     
48     48     
-32    32     
48     32     
80     112    
-32    160    
-144   -16    
48     0      
96     80     
-48    64     
80     48     
48     160    
-48    16     
16     -80    
176    96     
144    -48    
48     32     
96     128    
48     112    
80     0      
-48    -64    
16     -368   
96     144    
-48    128    
48     80     
192    272    
-272   112    
144    80     
-240   48     
48     16     
16     176    
-144   64     
0      0      
144    96     
-304   -176   
304    64     
48     64     
-16    96     
0      -128   
-32    -112   
256    320    
32     112    
-48    0      
288    240    
-64    -16    
16     -64    
-16    128    
64     -80    
0      -48    
32     64     
176    176    
-144   16     
112    16     
256    -48    
0      -64    
-32    128    
16     96     
80     96     
-32    48     
-80    -96    
128    96     
-32    144    
-32    80     
192    32     
224    272    
-256   48     
-64    -32    
224    128    
192    96     
0      -528   
112    -112   
-32    -368   
256    320    
-304   256    
0      144    
112    80     
-256   -48    
432    -16    
112    160    
96     -112   
-192   224    
256    -64    
-16    64     
0      48     
32     -64    
80     80     
128    -368   
-64    16     
288    112    
-64    160    
-80    -16    
-128   -32    
-48    -224   
64     144    
64     48     
-16    48     
-112   0      
-128   -224   
160    0      
0      -224   
96     112    
16     -144   
96     80     
-144   -528   
80     -16    
-80    -336   
48     720    
-96    -16    
-80    -16    
-192   48     
-64    240    
-16    -320   
16     -48    
368    48     
-224   -192   
208    -112   
-32    -144   
128    80     
-32    -80    
160    112    
-48    -1824  
-16    336    
32     -208   
-128   848    
240    112    
0      -272   
-160   -112   
256    -176   
48     80     
-208   -208   
240    80     
-64    -176   
64     112    
0      -784   
64     80     
0      32     
48     112    
32     64     
0      48     
-80    160    
192    -32    
80     112    
64     432    
48     0      
-192   -240   
96     -16    
-32    -144   
160    64     
240    208    
-288   272    
96     -448   
304    112    
-304   80     
80     -48    
-48    -16    
144    -112   
0      144    
112    -64    
128    64     
96     -64    
64     112    
64     -192   
176    48     
96     0      
272    192    
-176   -464   
64     -16    
-48    -64    
96     -384   
-144   -288   
208    112    
192    -384   
336    784    
-352   -832   
432    -240   
160    416    
0      224    
208    -80    
-16    16     
160    192    
-112   -64    
32     -96    
224    448    
96     16     
48     -528   
-448   32     
144    -304   
32     -32    
48     -624   
48     -48    
96     -224   
64     112    
336    464    
16     -48    
32     -48    
-16    0      
-112   -384   
96     32     
64     160    
96     -32    
-656   0      
-16    -32    
-208   -592   
384    -768   
96     224    
128    320    
48     -80    
-176   -2640  
160    -448   
304    224    
-192   368    
-272   -656   
144    -64    
-272   448    
-112   -128   
-144   -128   
128    0      
64     -112   
16     96     
144    272    
112    -416   
16     -240   
160    -640   
-208   -528   
208    432    
208    448    
-112   80     
176    192    
-144   -48    
-48    -464   
-112   -368   
320    -112   
64     224    
192    336    
-48    96     
160    0      
-48    -64    
128    -176   
160    176    
-128   80     
64     0      
-272   0      
320    -48    
-192   80     
-80    -64    
-160   -48    
336    192    
-1296  -16    
256    272    
-432   -272   
48     -64    
160    -32    
-128   -464   
272    -96    
80     -1248  
80     0      
224    -112   
-64    160    
48     0      
-96    -48    
-48    48     
496    224    
-752   0      
352    -48    
-224   32     
192    96     
-112   16     
-48    -240   
192    16     
48     -832   
192    48     
176    -80    
-128   64     
-80    112    
-48    -64    
-112   32     
32     -80    
-144   128    
128    48     
16     16     
16     -176   
-32    32     
80     -160   
-32    64     
0      -128   
144    -48    
-96    32     
32     -160   
-256   -48    
-16    -144   
-160   -32    
352    32     
-448   0      
48     -144   
-64    48     
-32    -256   
-144   64     
96     -240   
384    0      
-32    -240   
32     0      
-224   -48    
-32    -64    
176    80     
-96    16     
96     48     
112    16     
-224   -144   
176    -16    
-224   -176   
96     16     
144    64     
-640   -16    
0      112    
-544   -96    
-432   -80    
-128   -16    
-736   48     
144    -48    
-336   -192   
96     48     
112    -192   
-384   32     
224    -32    
-208   -16    
-144   0      
96     80     
-384   -208   
192    80     
-288   -400   
80     64     
96     64     
-256   32     
32     0      
-304   0      
-16    0      
32     -64    
-208   96     
304    32     
-272   48     
-96    -144   
-192   -16    
32     -304   
128    224    
-176   16     
0      96     
-96    0      
144    80     
-192   16     
-400   -16    
208    384    
-144   80     
-96    64     
-256   0      
0      96     
-80    -128   
48     144    
-80    -176   
-16    160    
144    16     
-240   16     
144    64     
-80    48     
-96    -48    
144    -96    
-48    -32    
-16    48     
-160   -96    
-928   -208   
-160   224    
240    368    
-16    80     
-16    -96    
96     48     
-192   -32    
16     16     
16     48     
-176   -128   
-64    -112   
-128   160    
208    0      
-592   0      
240    64     
-592   -96    
144    96     
-32    32     
32     112    
176    96     
-352   32     
272    -64    
176    272    
-224   96     
144    128    
-80    64     
80     176    
-224   16     
-208   -240   
208    16     
-320   -80    
448    32     
-80    16     
96     96     
112    80     
-80    96     
32     96     
-128   64     
96     16     
-176   -48    
-48    80     
-368   -208   
288    32     
-240   64     
176    112    
-320   32     
176    96     
-1968  -128   
-224   64     
32     16     
16     176    
-64    112    
-64    0      
-16    16     
80     96     
-192   48     
-32    0      
16     80     
-32    -80    
80     144    
-144   -160   
-128   -176   
-912   -544   
-96    64     
480    304    
-80    16     
160    128    
-112   0      
-16    -16    
80     -144   
176    160    
0      32     
-80    -16    
128    16     
96     864    
112    192    
-64    -80    
160    -48    
32     160    
32     48     
80     48     
96     352    
-80    0      
32     16     
144    48     
0      96     
-160   176    
64     48     
-288   -144   
304    64     
-32    144    
-144   -592   
-240   -288   
240    -128   
-336   48     
-64    48     
-32    32     
128    -48    
112    -112   
0      -48    
-304   -176   
-160   -64    
-288   -304   
-112   48     
192    512    
-224   -16    
48     80     
-80    48     
16     32     
176    144    
-64    48     
112    96     
48     80     
-32    160    
-80    -240   
-96    -192   
160    320    
240    96     
-240   -224   
272    736    
-192   640    
-16    -272   
-160   32     
144    64     
-96    -16    
208    208    
-192   32     
48     112    
-240   128    
192    -336   
0      -128   
-144   320    
16     16     
-128   -272   
128    144    
16     256    
112    128    
144    384    
-48    624    
208    80     
0      192    
-96    112    
64     32     
16     32     
-16    -48    
-32    48     
32     -208   
48     192    
48     96     
-32    -176   
-32    -64    
208    32     
-96    144    
80     48     
176    80     
0      112    
0      80     
112    112    
144    112    
-160   0      
-32    112    
32     48     
-16    64     
-16    0      
16     64     
48     80     
240    -16    
-272   -16    
96     -48    
336    368    
-176   368    
-80    48     
80     -176   
-32    -128   
144    -64    
0      64     
208    192    
-48    304    
-64    -16    
-144   -448   
256    512    
-192   -1232  
0      -64    
176    16     
0      48     
-64    80     
64     112    
64     16     
128    144    
0      256    
32     112    
128    -240   
64     112    
144    -48    
-144   -96    
144    0      
-16    -240   
336    432    
-96    496    
-48    -224   
48     -512   
32     -96    
416    272    
144    416    
-16    96     
192    96     
48     64     
48     112    
-64    64     
208    416    
96     304    
-64    -160   
-32    -16    
-48    0      
128    96     
-64    128    
64     112    
16     -16    
288    448    
128    640    
-400   -416   
224    -1392  
176    512    
48     432    
144    -736   
112    688    
48     -16    
-64    192    
288    576    
-272   288    
240    -368   
-32    -96    
128    80     
-112   -240   
-64    -32    
112    192    
0      48     
96     80     
160    496    
-240   -208   
16     -288   
80     -256   
112    240    
32     144    
96     512    
224    -224   
-144   -32    
48     -224   
-128   -256   
128    -16    
-272   -688   
48     -176   
288    240    
-224   224    
48     -96    
16     64     
240    -144   
-144   -48    
448    16     
-544   -368   
112    -784   
176    96     
-80    80     
-32    -48    
80     128    
272    -624   
-48    -32    
144    -464   
-144   -512   
48     192    
-32    0      
-256   -96    
144    80     
-16    -160   
-80    32     
16     -48    
-176   -128   
32     192    
160    -160   
-112   -192   
48     -128   
-16    128    
48     -144   
176    80     
-144   -16    
224    128    
-320   -240   
112    128    
-160   -224   
320    -16    
64     288    
96     -448   
-144   32     
112    -912   
-32    -240   
-288   240    
-48    -240   
96     16     
80     -432   
272    32     
-384   -128   
144    -64    
16     192    
96     32     
-144   48     
-160   -16    
288    32     
-224   -48    
224    32     
32     -208   
-528   0      
16     -176   
64     -96    
-32    -112   
80     -144   
-64    -352   
224    128    
16     80     
-16    -112   
128    -208   
48     96     
192    -96    
-128   64     
224    -96    
-272   -96    
-304   0      
96     32     
96     -48    
80     -176   
16     32     
144    -64    
128    -32    
64     -1968  
32     -48    
80     -224   
-320   -32    
288    80     
192    128    
-160   -64    
96     -144   
-160   -48    
32     -160   
-80    0      
-32    0      
48     16     
80     -64    
96     80     
-128   -496   
96     -80    
0      112    
176    80     
-32    0      
112    -96    
-80    -32    
128    -32    
-128   -16    
32     -208   
-16    288    
272    -16    
-288   -144   
192    -384   
0      128    
-80    -544   
176    -144   
-32    -1872  
144    48     
16     -96    
0      64     
16     80     
-96    128    
-160   32     
176    48     
-512   -32    
160    -80    
-1584  96     
192    80     
-112   80     
256    -48    
-48    32     
32     -496   
128    96     
-80    -48    
16     16     
-16    -96    
96     -304   
64     48     
112    -112   
-352   -64    
48     -208   
-48    48     
80     0      
-64    48     
80     -160   
96     112    
-64    -704   
-64    64     
-48    80     
32     448    
-304   0      
-64    -80    
-144   -48    
-80    -48    
112    128    
-128   -32    
80     16     
-32    -128   
-96    0      
80     -368   
-16    80     
96     -80    
-80    0      
144    16     
192    144    
-336   48     
144    32     
-160   -80    
96     48     
80     -96    
0      -32    
-48    0      
-16    -160   
-32    160    
208    -128   
-128   -64    
240    -96    
-576   96     
-176   -32    
-192   -64    
128    -96    
256    144    
-112   160    
48     64     
-80    0      
48     -32    
48     48     
-96    -80    
-96    112    
160    -32    
16     320    
-592   -656   
-224   -864   
176    -64    
-528   160    
-96    -224   
-528   -64    
-16    96     
64     48     
-224   -96    
160    -128   
-32    80     
-16    -80    
-32    80     
-208   -336   
128    16     
-112   48     
144    192    
0      80     
320    960    
400    240    
-496   0      
-64    64     
-624   -80    
192    -96    
-16    -96    
-16    -48    
208    -112   
-64    208    
-64    -48    
144    320    
288    288    
16     304    
-64    224    
-288   -288   
144    112    
192    416    
-208   432    
288    192    
176    80     
32     -48    
64     64     
-80    -176   
144    -112   
-176   -64    
80     -176   
-352   -192   
-16    -320   
-16    96     
144    -16    
-48    32     
208    304    
-80    304    
-336   -688   
48     176    
224    688    
-512   -496   
176    -256   
80     528    
-112   -32    
288    -160   
-48    256    
-16    0      
-224   32     
48     -160   
272    320    
-272   176    
48     -112   
144    64     
-144   304    
-48    -240   
160    256    
0      160    
-160   -176   
80     144    
128    64     
-320   -64    
112    96     
320    112    
-208   32     
144    96     
-80    -16    
-96    48     
-64    64     
192    208    
-320   64     
-96    -192   
-336   -624   
0      -112   
176    256    
-144   224    
48     208    
-16    96     
-272   -192   
128    -672   
-160   -384   
96     -304   
144    112    
-64    432    
-80    -64    
-192   -352   
144    160    
-464   64     
96     160    
32     272    
80     80     
112    -16    
-192   -352   
80     -32    
-96    112    
-80    -96    
144    128    
176    112    
-176   80     
160    80     
-144   -16    
80     64     
-16    96     
32     64     
64     80     
-64    32     
0      48     
-96    -48    
368    96     
-384   32     
224    -16    
-192   80     
-32    -272   
-176   -416   
80     112    
-128   -112   
128    192    
-32    512    
32     208    
-48    192    
16     128    
-176   -192   
48     384    
144    176    
-176   32     
96     80     
-160   -160   
-16    -48    
-112   -192   
48     224    
16     80     
48     480    
96     480    
80     272    
-80    128    
-176   -432   
32     64     
80     16     
48     80     
480    880    
-32    1040   
-272   304    
96     -880   
208    96     
-64    240    
-16    144    
-144   32     
16     96     
144    112    
-144   -112   
-48    64     
-112   -768   
416    560    
-16    240    
16     -144   
-32    144    
128    0      
-112   0      
-48    16     
32     112    
32     192    
32     192    
-64    -256   
112    -272   
-96    48     
112    -96    
32     16     
16     -64    
144    224    
16     160    
0      -32    
16     -16    
112    112    
-144   -64    
48     48     
32     64     
0      112    
48     128    
80     32     
96     64     
208    416    
-352   -128   
128    208    
64     288    
-80    -80    
96     -16    
160    -16    
80     64     
-128   -160   
32     -352   
192    80     
-128   288    
-144   32     
208    16     
160    32     
64     32     
-64    64     
80     96     
128    80     
16     64     
32     64     
-96    -576   
-96    32     
48     80     
-160   -32    
96     64     
-112   176    
0      -160   
240    0      
192    0      
144    96     
-112   96     
80     144    
112    144    
-16    -16    
144    160    
-64    16     
112    64     
16     80     
0      -144   
240    176    
-160   -624   
80     64     
-112   160    
-32    32     
176    176    
240    128    
-128   224    
176    288    
-192   48     
-16    -400   
288    -288   
288    -224   
-112   -144   
64     -80    
-64    -32    
160    -160   
-80    128    
96     192    
112    176    
0      32     
80     -48    
80     96     
64     96     
-320   80     
-16    96     
16     224    
80     -208   
-128   0      
32     -208   
-32    -96    
0      -384   
128    80     
128    -288   
96     16     
-160   -512   
208    48     
96     80     
16     80     
112    -80    
32     -48    
64     112    
208    -112   
96     128    
32     -96    
-64    128    
464    -144   
-320   64     
112    -512   
64     160    
-48    -864   
64     80     
-112   16     
96     16     
-80    -32    
224    128    
96     -128   
144    352    
-96    240    
-160   -224   
272    224    
144    -560   
-176   128    
144    16     
144    64     
-80    -16    
32     192    
192    -16    
-208   96     
80     112    
128    -16    
32     -96    
96     -656   
96     176    
-48    48     
0      96     
224    -48    
64     128    
304    144    
-320   208    
-16    -480   
48     -16    
160    80     
-64    112    
144    256    
-272   -32    
112    176    
128    -80    
-128   64     
224    -16    
128    144    
32     -48    
160    96     
48     -208   
16     96     
-48    -128   
96     -96    
-16    0      
80     -816   
-48    192    
-144   48     
32     208    
112    -32    
96     -1136  
16     32     
80     80     
-16    -144   
96     64     
176    80     
80     -32    
96     112    
144    64     
80     80     
64     -96    
32     -576   
-400   -64    
80     -80    
32     -144   
48     -48    
80     -80    
-32    -2144  
96     -112   
32     96     
128    -48    
32     -48    
128    -32    
16     -560   
-32    32     
32     -272   
32     80     
-96    48     
-160   80     
80     608    
128    288    
-112   -288   
32     -640   
-256   -192   
160    128    
80     192    
208    -96    
-64    -16    
160    -16    
-32    80     
-32    -128   
128    -224   
-464   288    
192    160    
-256   -384   
208    32     
-160   32     
-64    16     
112    80     
-144   -736   
112    -32    
112    -80    
-80    16     
16     80     
176    224    
-224   288    
80     -16    
-112   832    
-192   -240   
-720   -624   
32     384    
144    256    
208    -592   
192    -176   
96     -336   
-96    224    
208    272    
-64    -16    
32     96     
112    80     
-128   0      
64     -128   
-64    320    
-96    -16    
-32    -368   
176    272    
-992   -96    
176    16     
-64    64     
96     -208   
-208   -512   
-64    -320   
384    608    
-560   -288   
112    -592   
-208   32     
368    288    
-208   -32    
80     128    
144    0      
-96    -80    
-240   80     
-272   16     
-240   64     
48     -112   
16     32     
-160   -144   
-64    -208   
352    0      
144    320    
736    912    
-288   240    
176    -32    
-240   -928   
-288   -128   
672    176    
-272   -96    
432    -32    
96     176    
-16    -576   
240    -32    
-16    -800   
192    -288   
480    528    
-352   592    
-304   -720   
224    -320   
16     480    
160    -96    
0      80     
48     96     
-976   544    
160    -864   
16     -48    
400    400    
-208   -288   
64     -272   
208    48     
-16    672    
240    0      
-288   -64    
240    48     
-112   16     
-64    -16    
32     128    
528    -32    
-624   16     
320    -96    
-48    32     
-592   -64    
112    160    
-160   176    
-576   144    
-48    -208   
-1088  -432   
128    48     
-96    272    
-96    0      
352    96     
-416   160    
-64    -272   
-240   -416   
-240   368    
240    336    
-576   -688   
272    -448   
-128   416    
32     192    
48     16     
0      160    
64     -384   
80     512    
-144   672    
96     -32    
-784   -1200  
160    -1216  
32     64     
32     480    
-64    624    
224    -96    
-144   48     
-176   32     
16     16     
-32    16     
-64    112    
-32    64     
-336   -16    
-32    64     
-368   -48    
-80    32     
144    112    
0      -96    
-128   -160   
176    176    
-192   -48    
-160   -304   
0      128    
0      160    
64     192    
-240   176    
-96    112    
-32    -416   
-80    112    
-80    -80    
224    112    
0      128    
32     -32    
16     -208   
192    256    
-48    112    
80     -240   
128    32     
0      32     
80     32     
-240   176    
80     528    
-112   128    
0      128    
16     -64    
-160   -288   
-800   -256   
-112   224    
-160   48     
192    144    
80     464    
48     128    
-112   144    
48     -32    
-144   64     
-80    16     
-16    192    
-112   -80    
304    48     
-368   304    
288    160    
-208   -16    
0      -16    
64     0      
80     112    
-112   16     
-192   16     
256    80     
-240   -32    
-16    80     
128    192    
-160   128    
-144   64     
-160   32     
-192   -32    
32     128    
-256   -64    
64     80     
-592   -64    
128    -96    
224    16     
-144   144    
176    32     
-64    80     
176    64     
-80    16     
64     64     
-256   -16    
32     96     
-16    32     
-320   96     
96     -112   
-112   112    
-256   -96    
-112   -80    
0      -64    
96     16     
-32    112    
96     64     
-96    160    
-144   32     
-48    64     
80     16     
-16    96     
-48    80     
-240   -32    
-464   -176   
128    96     
-192   -112   
352    144    
-64    448    
-144   544    
224    368    
-352   64     
-16    -176   
-128   -256   
80     80     
48     304    
48     80     
-144   -176   
-80    16     
-336   0      
96     224    
96     -112   
192    48     
80     -96    
160    48     
192    -112   
208    96     
176    96     
144    256    
-112   -32    
16     -48    
80     96     
-80    0      
-96    -16    
464    288    
48     128    
-384   0      
48     272    
304    384    
-160   272    
-272   -48    
240    -64    
-16    16     
-80    -64    
144    48     
16     -64    
0      96     
-16    32     
176    256    
-112   48     
96     64     
224    48     
-64    16     
80     -112   
176    192    
192    16     
208    176    
-208   -80    
16     96     
128    96     
-208   -16    
96     0      
-16    -48    
96     96     
32     128    
-96    -112   
288    -64    
48     112    
128    96     
32     160    
80     64     
-144   -48    
128    112    
-96    144    
48     240    
96     64     
-16    48     
144    48     
-144   -304   
240    160    
80     64     
16     48     
176    256    
-160   208    
144    160    
16     96     
192    272    
160    -80    
-224   80     
256    96     
-32    32     
0      48     
-32    -96    
32     -240   
64     80     
16     80     
80     160    
-80    128    
-16    96     
64     112    
16     80     
112    32     
128    -64    
0      -112   
0      32     
-128   -672   
176    64     
176    128    
-32    -128   
176    112    
-160   368    
240    192    
-16    -32    
-16    32     
272    192    
-112   128    
-32    48     
112    16     
32     128    
32     64     
96     192    
112    96     
64     224    
112    -80    
-128   -160   
144    -1040  
112    96     
-144   -64    
-64    -272   
64     -688   
112    -240   
160    -208   
64     272    
224    384    
112    416    
-112   240    
64     0      
16     -16    
-16    -64    
64     160    
48     -320   
-48    -144   
96     -32    
80     -144   
96     -64    
32     -96    
48     -208   
-16    496    
128    384    
-48    32     
-16    32     
-64    -240   
288    288    
-16    256    
-16    -32    
32     -288   
224    208    
-48    -1488  
-16    -256   
224    -1280  
-64    0      
176    16     
128    112    
208    352    
-192   -432   
-160   448    
144    -464   
96     272    
160    208    
80     192    
-32    -784   
112    -128   
64     -64    
-176   -240   
432    -432   
-16    256    
-80    -16    
-16    -96    
128    -32    
80     320    
32     304    
128    256    
288    576    
96     -368   
-208   128    
-384   -624   
304    -240   
-32    512    
144    112    
0      -160   
32     64     
-96    -144   
384    -32    
-64    112    
64     -224   
0      -16    
-64    160    
-48    -48    
-160   -480   
64     0      
16     480    
208    288    
160    128    
96     -144   
-48    -784   
256    528    
-64    240    
128    -256   
16     288    
176    272    
-144   -1904  
144    -32    
0      -16    
-112   -288   
-80    -576   
-128   -160   
32     192    
160    80     
128    320    
128    -80    
0      -176   
160    144    
-16    -176   
176    -368   
304    208    
160    528    
-144   -592   
96     -240   
240    -144   
-224   -1776  
-96    -128   
272    -32    
64     256    
-64    -576   
0      -32    
176    -176   
-256   -64    
-32    -304   
208    -496   
-416   96     
-256   320    
256    -832   
-128   -320   
-16    304    
-32    128    
16     224    
80     -416   
-96    240    
-48    112    
0      -192   
-64    64     
176    -304   
-304   400    
96     -784   
-560   -160   
640    -608   
-176   416    
80     -272   
144    -192   
128    32     
128    768    
144    -320   
-144   -176   
-160   -416   
240    16     
-16    96     
320    64     
-368   -80    
192    -80    
-448   128    
64     -160   
-1280  240    
160    -416   
128    176    
0      -160   
224    -176   
16     -688   
-192   112    
-64    -368   
240    -160   
160    64     
-112   -144   
336    304    
-208   -144   
-112   -64    
-16    0      
-464   -64    
128    80     
64     -112   
-80    0      
96     -288   
64     -832   
224    432    
-208   -912   
176    -192   
32     112    
-80    -112   
-144   -208   
16     -160   
48     16     
0      -48    
144    48     
32     16     
48     -16    
48     -208   
208    32     
-240   -96    
160    64     
-48    -464   
-160   32     
240    48     
-48    128    
-64    64     
192    304    
-128   400    
-16    80     
-320   16     
-16    -240   
-256   -144   
-80    -144   
208    -16    
16     -32    
-112   16     
-16    -432   
48     64     
48     64     
-112   -48    
176    112    
-48    112    
-224   64     
112    16     
-80    -32    
224    240    
-192   16     
32     64     
160    32     
112    -176   
112    -96    
0      -576   
288    32     
-32    64     
48     32     
-48    48     
80     -112   
-256   32     
96     -64    
-192   32     
208    32     
-80    160    
80     -16    
-416   80     
384    -128   
-272   -32    
-96    -256   
-896   16     
64     -16    
-1408  -96    
32     0      
32     -64    
-80    80     
336    208    
-192   128    
112    48     
-80    -64    
-240   -256   
-112   48     
-352   -176   
112    128    
0      80     
-64    -64    
96     80     
-256   144    
-272   -112   
448    80     
-128   96     
-112   -64    
-16    16     
-112   -96    
-16    80     
-384   -16    
144    208    
-208   16     
32     160    
48     288    
-256   -32    
32     144    
0      0      
0      64     
-16    224    
192    48     
-2064  -224   
160    176    
-256   -64    
224    240    
-64    160    
96     208    
16     -320   
-48    -32    
80     -32    
-160   224    
-48    256    
-192   0      
240    288    
-240   -32    
-288   96     
16     128    
-224   176    
-16    256    
-176   320    
-160   -144   
-48    32     
-144   -160   
-336   0      
-16    -32    
-304   -272   
-144   -192   
-208   -48    
-80    176    
-176   -80    
-192   -352   
64     -448   
-288   -272   
128    -112   
80     -224   
-48    -256   
336    224    
64     144    
16     80     
64     96     
144    32     
-384   112    
-48    -224   
-96    -32    
336    128    
-160   80     
112    160    
-64    96     
-752   -16    
-96    48     
48     32     
272    128    
-224   16     
160    -96    
144    -32    
-320   32     
112    64     
64     -16    
368    224    
-448   176    
48     0      
-176   -192   
-80    -208   
-48    -32    
0      96     
-192   -64    
64     48     
16     32     
-32    16     
32     80     
-112   112    
160    80     
-32    208    
-112   112    
-16    80     
-64    32     
-16    16     
48     -16    
16     -16    
-16    32     
-144   80     
-48    32     
-64    64     
-80    32     
64     80     
96     80     
48     80     
-96    16     
16     -128   
-208   48     
32     64     
-288   -288   
224    48     
-96    80     
32     112    
16     32     
48     0      
208    144    
32     256    
-128   224    
-128   96     
16     -32    
-48    -32    
-48    -352   
-112   -192   
-240   -368   
448    -112   
-64    464    
-272   -192   
144    240    
-32    32     
16     112    
16     32     
-48    80     
16     32     
0      144    
48     48     
-256   -336   
-48    -272   
-64    -16    
160    32     
80     832    
0      80     
-192   -352   
160    -48    
-80    112    
16     96     
48     144    
16     208    
-112   320    
64     -48    
48     80     
-80    0      
-32    -208   
-16    224    
32     -96    
-64    0      
32     128    
-32    -32    
-128   128    
288    656    
-272   160    
64     -272   
-48    144    
-112   144    
64     -112   
48     128    
0      320    
-32    -208   
-304   -176   
80     320    
128    1280   
64     1104   
-176   -80    
-48    -416   
-64    64     
-80    -16    
112    48     
64     48     
-80    -16    
-64    -64    
176    -80    
-48    64     
16     32     
-64    128    
160    96     
-48    64     
160    96     
-48    96     
32     256    
144    368    
0      96     
32     64     
128    32     
0      16     
32     32     
192    240    
-224   144    
-64    112    
-496   -512   
800    -640   
-32    -48    
432    128    
32     240    
128    0      
176    256    
240    288    
-128   -64    
-144   -128   
-112   -192   
-288   -304   
144    -32    
-208   96     
304    32     
-16    -16    
32     224    
-16    48     
272    -208   
-272   272    
368    -1424  
-320   -752   
-16    -656   
288    208    
-32    608    
496    544    
-176   352    
112    224    
144    224    
-48    288    
192    -160   
-112   -448   
240    192    
48     192    
-208   272    
352    -1776  
-80    720    
64     -96    
-16    -320   
176    256    
128    160    
-208   320    
432    368    
-368   -224   
160    32     
-96    80     
112    -32    
432    464    
-400   -288   
192    -272   
-80    -368   
-160   -656   
-160   -1072  
288    480    
-128   96     
64     96     
-32    -432   
160    336    
-128   -160   
240    -176   
-320   -240   
208    -496   
160    608    
0      -560   
-96    -128   
64     -512   
96     368    
304    -576   
-448   -64    
32     -608   
128    416    
-48    448    
80     -304   
-96    -64    
128    224    
-32    64     
112    80     
144    416    
80     16     
32     64     
-48    -144   
-16    464    
224    -32    
-144   288    
320    -304   
-112   176    
-64    96     
336    288    
-272   -208   
272    64     
-128   -48    
112    -272   
-80    -64    
80     -288   
-16    -96    
-96    -544   
128    80     
-16    -384   
256    432    
112    144    
-16    176    
-48    -48    
48     -384   
-176   -368   
208    32     
32     224    
192    -16    
64     256    
-112   -416   
224    352    
-96    -80    
160    400    
304    0      
-208   176    
64     224    
0      16     
64     192    
112    304    
-144   -256   
96     -224   
144    560    
176    16     
-112   144    
64     -192   
0      64     
32     48     
64     160    
16     -16    
32     32     
-80    -496   
288    16     
32     64     
48     -480   
32     -288   
-128   -16    
96     -992   
-32    -96    
80     -2272  
0      64     
-112   112    
160    -112   
160    -16    
-32    -48    
192    -256   
0      -48    
64     -672   
-64    160    
-192   -560   
96     -368   
-96    -32    
-144   -672   
48     -160   
192    -160   
-80    -16    
256    -368   
-48    -64    
96     224    
-128   -128   
80     -64    
48     16     
32     -96    
64     112    
-48    -16    
48     -256   
-352   -128   
112    -112   
64     64     
96     -64    
-32    -48    
224    -480   
96     -48    
-128   -48    
176    0      
16     48     
112    64     
-16    16     
128    16     
-224   -48    
32     -112   
-192   -32    
-32    128    
-96    16     
64     -96    
64     -80    
96     -256   
96     352    
144    -832   
-144   -400   
-16    -624   
64     128    
144    496    
224    320    
112    240    
-144   32     
-16    -32    
144    -160   
-400   0      
160    144    
80     -144   
160    144    
80     48     
0      -416   
192    96     
112    -432   
-16    -16    
-16    -16    
96     -32    
-16    -80    
96     -128   
-16    0      
-128   -192   
64     -32    
48     80     
-96    160    
80     48     
352    384    
-240   208    
16     304    
-80    -208   
-240   -480   
224    224    
48     0      
-320   -160   
144    -32    
-96    -48    
112    -64    
-320   64     
128    -48    
-1664  -112   
-96    -544   
304    -432   
-64    -144   
352    176    
-144   -256   
176    0      
-32    -80    
0      -112   
-272   -32    
-48    -112   
-176   64     
-96    128    
80     -48    
0      32     
-32    -64    
32     -144   
-192   -96    
176    -288   
240    128    
-208   -688   
352    -400   
-752   144    
448    -32    
-96    112    
256    80     
-240   64     
256    -80    
-16    160    
160    -272   
-1248  96     
320    -64    
208    48     
-48    -64    
128    112    
-176   -304   
-96    -192   
-64    -32    
208    48     
64     96     
-160   -64    
-48    -112   
64     -80    
-128   80     
48     0      
-96    80     
-1120  -144   
176    -80    
-752   -64    
112    128    
-64    160    
-432   64     
32     48     
-96    16     
16     0      
-176   -64    
-176   -144   
256    0      
48     176    
32     96     
-96    -48    
-400   -160   
-48    160    
-96    -208   
240    -48    
64     80     
-96    32     
-96    -128   
16     160    
0      -48    
-416   80     
64     160    
-576   -96    
-16    -32    
176    -16    
0      80     
-16    -144   
48     48     
272    224    
-192   672    
-80    160    
16     432    
-64    -192   
-160   -432   
80     432    
-320   -192   
80     128    
-928   528    
-64    -400   
-176   -400   
-64    -96    
368    384    
-368   16     
272    -272   
-144   32     
16     144    
-32    0      
-16    80     
128    0      
-288   112    
128    -64    
-192   64     
16     -16    
-16    112    
-304   -16    
-64    16     
16     -224   
16     -256   
-160   -48    
-16    -288   
208    432    
-112   496    
112    -128   
-48    -32    
112    144    
-384   -320   
-16    -288   
-16    48     
16     96     
-832   -192   
144    -112   
32     -240   
160    176    
-48    0      
16     144    
80     80     
-256   -48    
48     80     
-208   80     
64     160    
-160   48     
64     64     
-128   -80    
64     -80    
-288   -16    
48     560    
48     -64    
-16    112    
16     32     
-96    512    
224    1088   
96     352    
-224   512    
32     416    
-48    -48    
80     -48    
0      128    
-32    32     
-32    -48    
-16    -32    
112    112    
-240   -64    
-96    80     
144    32     
-272   -16    
16     112    
208    64     
-160   -160   
48     -304   
48     208    
80     208    
-16    208    
-128   32     
-80    256    
64     16     
176    256    
-80    112    
-144   -16    
112    448    
448    1072   
-224   592    
16     -96    
-160   144    
224    -96    
-288   -64    
272    -288   
-64    -144   
-32    -368   
496    -32    
-48    576    
112    320    
-96    -160   
80     -272   
48     256    
112    48     
64     144    
544    896    
-576   -256   
-288   -1040  
480    -160   
-32    736    
256    -128   
96     32     
256    352    
-176   -128   
-288   -80    
48     -32    
-128   -256   
-240   -288   
-96    -1136  
224    -144   
-112   560    
0      80     
128    48     
-112   224    
-192   144    
48     544    
176    816    
-224   160    
-240   -208   
-432   -928   
80     160    
128    208    
-32    192    
48     32     
-160   -80    
288    464    
-80    208    
-192   -432   
144    -240   
-64    -80    
128    64     
-176   -160   
48     304    
256    224    
-32    -16    
0      16     
160    96     
16     384    
144    64     
48     208    
48     64     
16     64     
96     -32    
-176   -96    
-128   -240   
16     -16    
160    48     
0      16     
80     48     
32     -80    
96     128    
-48    128    
48     48     
-224   -128   
208    16     
176    160    
-160   112    
288    288    
-368   80     
-16    32     
160    64     
0      -80    
-80    -752   
32     -16    
-16    -48    
-32    240    
432    496    
-592   144    
16     32     
240    64     
-208   32     
-112   32     
0      -32    
192    64     
16     32     
96     144    
-112   -64    
16     -176   
240    160    
-160   -96    
32     -16    
96     64     
32     112    
176    144    
32     48     
-64    32     
48     112    
32     -112   
-112   0      
64     128    
0      112    
48     64     
128    -48    
112    80     
0      -96    
80     112    
0      0      
192    208    
0      160    
-32    112    
80     80     
-16    144    
16     -96    
16     112    
112    -96    
-96    0      
192    144    
-48    -144   
96     96     
-32    -672   
-32    48     
128    32     
-64    144    
16     -16    
128    192    
-80    -32    
-128   -48    
208    -48    
16     144    
-16    0      
-32    -96    
96     64     
224    32     
-144   304    
-112   -112   
32     160    
160    -288   
-128   96     
112    -16    
0      112    
-32    -32    
96     192    
16     240    
96     112    
16     32     
112    -16    
0      48     
112    32     
-128   128    
96     -96    
160    128    
-64    -144   
48     32     
80     192    
48     32     
-208   -192   
240    -208   
-32    144    
176    64     
16     112    
80     -144   
16     192    
112    -112   
-16    64     
32     -48    
-32    128    
288    -560   
-192   -16    
128    -512   
224    224    
-48    128    
112    144    
-16    -32    
-16    208    
128    192    
-112   -192   
-64    -48    
272    -64    
96     160    
-176   -352   
144    112    
-16    -512   
112    64     
-48    144    
336    160    
-384   96     
256    224    
-304   176    
80     -240   
0      32     
-96    -48    
96     144    
-48    -48    
80     48     
160    -16    
-64    32     
32     0      
144    0      
96     -272   
96     -112   
-32    0      
-16    -1648  
0      16     
48     64     
-208   -736   
368    -64    
-48    -496   
112    -256   
32     128    
224    64     
-80    32     
128    0      
32     -240   
64     0      
32     -1104  
448    400    
-240   128    
-48    -112   
-80    -48    
64     -400   
-144   -384   
16     -800   
176    -32    
0      -368   
80     80     
80     80     
32     -160   
128    -560   
128    112    
80     -80    
-16    48     
160    64     
-96    -384   
-960   16     
224    0      
-320   -192   
384    -224   
80     128    
-160   -240   
-48    -144   
224    -320   
-112   -80    
448    -64    
-416   96     
448    -48    
-272   -112   
64     -16    
-144   -448   
-320   -512   
272    -32    
176    112    
128    64     
32     256    
112    -448   
96     -96    
144    -1712  
-80    -16    
208    48     
-32    192    
96     -176   
144    96     
-368   0      
112    64     
-144   -112   
112    -32    
-48    32     
-32    -64    
96     -48    
-80    -304   
160    -48    
-48    -480   
16     16     
-64    -160   
208    320    
-144   -160   
-16    -240   
64     -272   
-16    -208   
240    -208   
-80    48     
-304   208    
32     -352   
-384   -128   
256    16     
-96    0      
208    -320   
48     336    
32     -2528  
16     96     
112    80     
32     0      
80     176    
16     -64    
-64    96     
-64    -272   
128    -16    
80     -32    
-384   -16    
128    -32    
-96    -480   
16     -352   
64     -16    
-32    -1408  
112    -96    
-192   112    
256    -176   
-96    16     
224    -64    
-64    32     
176    64     
-160   64     
16     32     
0      -16    
80     -96    
96     16     
64     -144   
48     80     
80     -400   
48     0      
112    208    
-240   208    
32     -80    
192    -96    
-160   -96    
16     160    
-48    176    
48     -160   
-160   16     
64     -176   
-16    0      
112    -192   
-96    160    
16     -192   
80     -48    
48     -16    
0      0      
96     112    
-32    16     
0      32     
64     -48    
-320   64     
48     -128   
-64    -192   
144    -144   
112    80     
-1664  -304   
-96    -80    
-144   -64    
48     80     
-96    0      
-352   96     
-32    16     
96     -16    
-96    -112   
32     48     
144    -112   
304    0      
-48    144    
-768   -48    
112    128    
-208   -96    
48     64     
16     0      
-240   64     
-48    32     
32     64     
-96    -16    
-112   0      
-112   32     
128    48     
16     80     
-80    352    
112    -112   
-448   -656   
-16    -480   
80     -288   
16     144    
208    112    
-240   144    
-128   -336   
-256   -112   
-32    -224   
288    640    
-128   1264   
-240   -480   
224    -480   
-64    224    
48     96     
-32    -64    
-64    256    
-208   -208   
272    48     
-368   -288   
16     -208   
-16    96     
128    160    
-128   -272   
336    288    
-144   240    
-224   -336   
160    -16    
-368   112    
256    416    
-112   208    
144    256    
-128   16     
32     160    
-16    48     
-16    16     
-128   -96    
0      48     
-16    32     
224    464    
-272   512    
-112   0      
-144   -16    
-272   0      
-16    -208   
-224   -272   
80     -48    
-144   -16    
-288   -192   
144    48     
-224   -224   
448    -160   
-352   96     
272    -32    
-272   0      
48     16     
-352   0      
768    480    
-608   176    
256    320    
-528   -272   
32     48     
144    96     
-112   32     
-288   -160   
352    16     
-176   128    
-16    -176   
-320   -48    
496    -48    
-176   240    
160    32     
32     144    
48     16     
-32    96     
-336   -32    
-32    32     
-32    -64    
48     0      
0      0      
-96    0      
336    80     
-432   48     
16     48     
-64    32     
192    -96    
-256   0      
240    112    
-288   -128   
304    192    
-448   16     
176    80     
-80    32     
-48    32     
64     128    
-272   48     
192    80     
-80    80     
-96    -64    
64     -112   
-160   96     
32     -32    
16     112    
192    32     
-176   80     
16     176    
-32    -64    
144    16     
96     112    
64     16     
176    112    
32     144    
-128   80     
16     80     
0      48     
0      0      
96     272    
96     16     
-96    64     
240    -48    
80     48     
-16    128    
-128   64     
16     32     
-32    80     
128    144    
96     64     
-128   -16    
176    64     
-144   48     
112    64     
-112   32     
-80    48     
-144   -160   
-32    -16    
32     48     
-32    112    
32     112    
-48    32     
-128   144    
128    64     
96     96     
0      -32    
32     368    
144    80     
-144   16     
-16    -48    
48     16     
80     -80    
-80    112    
272    64     
-96    96     
96     128    
96     96     
-32    160    
112    48     
32     64     
96     -64    
-96    -64    
144    112    
-32    48     
32     80     
0      -16    
48     144    
128    -32    
-48    96     
-112   -16    
64     160    
48     64     
16     96     
48     48     
192    80     
-112   -16    
64     64     
32     64     
32     208    
-112   64     
-176   -192   
224    32     
-32    240    
32     112    
0      16     
128    80     
-144   32     
144    208    
96     48     
-112   -48    
32     32     
96     48     
0      0      
64     96     
-64    32     
-80    -192   
192    240    
-32    144    
240    320    
-224   96     
256    32     
-160   64     
-16    80     
64     80     
64     0      
64     -128   
-16    64     
16     -112   
0      48     
128    192    
128    -416   
-96    112    
192    -112   
-112   32     
112    -80    
112    112    
64     224    
48     144    
-64    128    
176    64     
-112   32     
64     112    
-144   -128   
160    128    
0      64     
0      -112   
48     320    
128    -240   
16     80     
-48    -16    
192    112    
-288   96     
112    96     
-80    -256   
128    48     
-144   -32    
288    80     
-240   80     
0      -320   
96     128    
368    112    
-384   208    
-32    -256   
112    128    
80     400    
-80    128    
96     304    
-304   -160   
304    -16    
48     -16    
-32    -48    
-48    80     
-32    144    
16     0      
32     64     
32     -64    
-176   -16    
0      -112   
32     160    
80     -256   
304    176    
-224   304    
112    256    
-416   64     
320    208    
-208   16     
-48    48     
-32    -80    
128    -128   
144    112    
272    0      
-224   288    
-80    80     
80     176    
368    -160   
-208   -64    
288    -2656  
32     -64    
-320   -464   
-16    -224   
0      -64    
-128   112    
176    224    
96     16     
-96    16     
128    48     
-16    32     
272    0      
-256   16     
16     -336   
-16    144    
32     -752   
160    96     
-16    64     
320    192    
-192   720    
48     -240   
96     144    
192    32     
-64    48     
96     -32    
96     80     
0      -80    
48     80     
32     224    
448    64     
-176   -176   
-80    368    
-112   -752   
64     -560   
144    272    
176    400    
16     96     
0      128    
80     0      
48     -32    
-16    -16    
64     -288   
-16    48     
160    208    
-16    336    
0      -160   
96     -1216  
-16    16     
96     -208   
32     -352   
128    48     
-96    -416   
144    -160   
-80    -976   
144    -400   
144    -336   
128    -64    
-64    0      
144    16     
96     -608   
-32    16     
176    -32    
-96    48     
-16    -96    
64     -128   
-336   64     
64     -176   
0      -16    
64     -528   
128    -176   
-208   -1360  
128    -256   
176    -176   
-96    -48    
176    -16    
-96    80     
64     -48    
48     80     
160    256    
-176   -16    
-736   -96    
144    -48    
-16    -144   
208    32     
32     64     
112    -656   
96     -64    
-16    -864   
48     -80    
96     -112   
-16    -16    
96     -144   
-128   -416   
-160   -352   
112    192    
-192   144    
48     -16    
80     176    
-176   -144   
240    -208   
-112   -400   
144    -528   
80     -720   
112    512    
480    256    
64     528    
192    -16    
0      -16    
64     -16    
-64    64     
48     -64    
32     -32    
-720   32     
592    416    
-304   512    
48     -608   
48     -80    
160    -224   
-16    80     
128    -736   
-128   592    
144    -1120  
144    144    
-80    528    
-48    -592   
128    -176   
208    352    
-304   144    
0      -224   
-160   176    
-192   128    
16     352    
16     -752   
-256   -368   
288    -1216  
-144   256    
-192   -16    
192    -208   
0      -160   
80     64     
-32    64     
144    -16    
-224   -48    
0      416    
128    176    
32     -112   
160    96     
176    -80    
-96    80     
112    -448   
96     304    
-112   16     
112    192    
96     0      
32     -160   
32     32     
208    256    
-240   144    
64     48     
96     80     
208    -144   
-208   16     
256    -544   
-208   -64    
448    176    
-48    96     
-112   112    
-16    -48    
-32    160    
128    80     
-112   0      
160    32     
-368   -32    
96     -112   
-1072  -16    
0      -272   
128    112    
192    48     
-96    96     
-1216  -192   
-784   240    
-416   16     
80     -128   
-48    64     
144    32     
-112   32     
32     80     
-80    -32    
400    512    
-816   -128   
-608   176    
48     128    
-32    0      
-80    -96    
-112   16     
-272   -32    
-80    128    
-352   64     
-128   80     
-464   -32    
-256   16     
48     -48    
-112   80     
-16    0      
0      32     
-144   -160   
-160   -64    
16     -304   
32     -128   
160    48     
-112   -64    
32     128    
-528   -32    
-80    -64    
-240   -128   
-128   64     
320    0      
-128   96     
272    64     
96     176    
-416   -320   
112    144    
-80    -272   
-128   96     
-16    32     
32     48     
32     64     
-240   16     
-16    -16    
-192   -112   
-64    16     
-176   64     
192    112    
-272   -112   
-16    96     
-96    -80    
-32    -48    
-16    -48    
192    80     
16     80     
176    16     
-368   16     
112    -32    
-288   64     
64     64     
0      64     
-400   -64    
80     -48    
-1648  32     
320    272    
-304   -96    
128    -48    
16     -16    
-64    32     
-80    176    
0      160    
-208   64     
-48    -80    
64     -32    
48     64     
-320   -480   
32     -16    
64     112    
-656   -96    
208    80     
-16    -128   
16     176    
48     48     
96     112    
-144   128    
128    64     
48     -192   
64     64     
-80    16     
-208   -112   
80     -112   
0      48     
48     48     
-128   64     
80     112    
-416   -64    
-32    -32    
48     80     
0      32     
-16    32     
96     112    
-112   -96    
-32    -32    
112    48     
-128   -144   
-48    144    
-80    -16    
32     160    
-128   -32    
32     96     
-464   -96    
-64    16     
16     32     
64     32     
-80    80     
144    -48    
16     128    
-192   32     
-96    -16    
64     48     
-96    16     
-192   -80    
144    80     
-160   -16    
80     48     
-112   64     
112    80     
64     48     
-64    32     
-32    -80    
208    -16    
-64    80     
144    176    
-288   32     
16     96     
96     240    
-192   16     
208    112    
-128   16     
80     256    
96     240    
-320   128    
304    80     
-16    -96    
64     80     
320    368    
-192   368    
144    272    
-272   0      
32     -64    
80     256    
112    144    
-240   0      
96     -16    
-256   240    
128    -176   
-80    -96    
128    0      
16     64     
176    336    
-224   -192   
-16    -96    
176    144    
32     112    
16     112    
32     64     
16     144    
144    32     
-144   -64    
32     -16    
-32    -64    
48     -224   
208    64     
-400   -320   
448    224    
-320   192    
16     -80    
-272   -112   
-160   -400   
128    -208   
0      272    
304    608    
-224   0      
80     160    
0      -16    
0      32     
96     80     
-112   -128   
48     -144   
-192   -304   
-176   -624   
0      0      
208    192    
-80    448    
112    160    
-48    -64    
-112   -32    
16     -256   
-112   -80    
-16    -32    
128    256    
-208   80     
32     64     
-80    240    
224    -368   
-240   -64    
224    384    
-208   128    
16     -32    
-48    -304   
-32    208    
288    560    
-48    -288   
112    -112   
-48    128    
176    16     
-48    128    
16     -256   
272    128    
160    816    
-208   80     
-160   -592   
384    -192   
-240   304    
288    480    
400    320    
-272   384    
128    -576   
-16    64     
256    128    
-48    0      
-16    -16    
272    96     
-80    112    
48     64     
48     16     
-16    48     
96     -48    
-32    144    
-128   160    
160    -304   
-16    208    
288    -512   
-320   -656   
64     -1920  
208    368    
112    352    
160    176    
-128   64     
160    128    
-48    32     
-48    -64    
272    -64    
-112   336    
80     48     
-16    16     
160    144    
48     -208   
16     240    
32     -144   
96     96     
176    304    
-48    592    
336    480    
-176   304    
-16    -48    
-160   -368   
320    112    
-144   96     
-80    16     
176    -64    
-64    96     
128    0      
32     96     
80     -96    
16     96     
16     -1568  
48     80     
-176   48     
176    16     
-80    -352   
-256   -672   
-144   -592   
128    -80    
-80    -32    
160    -80    
96     240    
112    64     
64     144    
176    80     
-48    176    
160    -1184  
16     -48    
512    96     
-416   80     
48     -448   
224    -48    
-304   304    
144    -336   
80     -48    
144    -176   
-96    -64    
64     32     
16     144    
32     -368   
208    -16    
464    400    
-448   0      
160    -192   
-144   -144   
48     -256   
416    272    
-80    128    
128    -320   
144    16     
80     432    
288    -80    
-176   -384   
96     160    
128    288    
96     176    
-112   -416   
0      32     
176    704    
192    -80    
-176   -288   
144    -272   
-80    96     
160    160    
-240   -336   
304    -192   
-96    128    
-32    64     
320    -80    
16     -96    
16     32     
-144   -496   
16     -144   
64     48     
-96    496    
112    304    
-176   -112   
-96    -400   
128    -144   
-96    -1024  
64     -112   
64     0      
96     -48    
176    256    
-64    -96    
240    288    
-208   -144   
128    -400   
-64    80     
-144   -144   
16     -144   
128    -624   
-96    -624   
48     -176   
112    -32    
0      48     
-144   -704   
304    -128   
-224   -1552  
224    -48    
-16    112    
112    80     
80     -192   
-64    192    
144    -112   
-128   80     
-336   -416   
480    -560   
-736   -192   
448    -496   
-128   -432   
288    -448   
128    -240   
320    -192   
128    192    
96     -96    
-64    -80    
64     48     
-192   48     
-32    -112   
16     -48    
48     -160   
0      16     
-1088  -176   
-240   -208   
224    64     
-144   64     
32     -48    
-32    80     
368    -32    
128    -1056  
-64    112    
-16    -96    
256    64     
-80    -112   
-96    -352   
32     -176   
96     -32    
-112   80     
-128   -144   
160    -64    
352    192    
96     224    
336    -320   
0      -320   
176    -608   
224    80     
208    0      
-272   -16    
112    48     
32     -128   
-272   -96    
96     -240   
0      -32    
0      -288   
112    -32    
16     0      
208    -16    
256    -208   
128    16     
80     -528   
144    144    
-48    -256   
64     32     
80     -16    
192    -32    
32     32     
96     80     
-128   48     
32     -16    
-144   128    
-80    48     
-416   160    
320    48     
-128   0      
208    -80    
-192   48     
96     -560   
-16    80     
64     0      
112    -48    
-16    192    
32     16     
-544   -64    
80     -208   
48     -112   
-32    16     
-16    16     
48     64     
160    96     
-32    -176   
128    192    
-160   -416   
288    -144   
-304   -32    
240    -16    
-416   48     
240    -64    
-224   -32    
128    -80    
-64    32     
0      0      
176    112    
-128   -336   
-80    -192   
224    -672   
-16    144    
0      -144   
32     0      
32     64     
144    240    
-64    272    
-144   -32    
48     -16    
16     0      
-240   -144   
240    -144   
-16    0      
128    -80    
112    176    
-1024  -144   
128    112    
144    16     
-848   -32    
0      96     
-1536  -48    
-144   64     
-224   16     
0      32     
80     -128   
-64    48     
64     -144   
0      48     
-112   -80    
16     176    
96     80     
-48    160    
-96    -16    
-80    -80    
80     32     
-176   112    
-64    0      
-240   -96    
-16    -32    
96     0      
-80    0      
-384   -16    
48     -16    
0      -304   
-64    -16    
0      -96    
-32    16     
96     128    
-224   0      
80     -224   
32     -192   
-80    -192   
-96    80     
96     144    
-848   96     
80     -64    
0      -112   
336    96     
-464   -128   
144    -16    
-176   -368   
-32    608    
192    112    
-224   -144   
64     80     
-144   -80    
-32    0      
-16    160    
-144   -80    
192    -192   
48     384    
-160   -832   
272    416    
-112   48     
112    208    
-96    -384   
-96    -144   
-16    -176   
0      -384   
144    -320   
-32    208    
16     240    
-16    -64    
160    128    
-384   0      
0      -32    
-336   64     
-48    64     
-160   -384   
208    -208   
112    416    
80     112    
16     -16    
-240   80     
-32    -96    
64     -16    
64     80     
-176   -32    
-96    64     
192    160    
-16    320    
-144   -176   
32     112    
64     -64    
64     -224   
16     240    
64     144    
-416   -32    
-96    -512   
304    176    
-48    512    
-80    -64    
-80    0      
-16    -64    
-272   32     
-64    416    
-240   -288   
-96    288    
-528   -96    
80     1312   
-192   -640   
-144   -656   
-64    304    
-144   304    
16     -272   
-176   -240   
224    -256   
-32    -224   
80     320    
96     416    
-288   -160   
-160   -16    
-176   288    
144    32     
-384   -144   
368    -16    
-176   576    
64     -480   
-224   144    
-16    -96    
176    -80    
-176   624    
128    -576   
-80    -48    
-32    -64    
240    -112   
-240   320    
-128   -224   
224    608    
-48    48     
-240   -128   
16     320    
-16    48     
0      32     
-32    16     
0      64     
-32    16     
128    -32    
-176   144    
-32    -32    
0      80     
-128   32     
-128   -240   
272    96     
0      432    
96     48     
272    96     
-208   304    
256    64     
-240   208    
160    -64    
-64    80     
-288   -16    
96     -128   
16     256    
-16    112    
-192   32     
144    112    
-240   672    
80     32     
240    -96    
-176   208    
0      -80    
0      192    
16     -576   
64     144    
336    480    
-448   144    
320    16     
-208   -160   
240    -320   
-64    208    
-48    -368   
64     -96    
176    272    
304    80     
-160   80     
64     48     
-48    80     
-16    32     
0      48     
96     112    
16     16     
160    0      
-240   -208   
-64    -144   
-304   -128   
208    -112   
16     464    
-16    224    
-96    -160   
64     144    
176    384    
-176   288    
16     -144   
-64    -80    
128    192    
-16    -64    
-32    160    
-48    0      
80     -608   
-96    -176   
0      -96    
112    144    
144    192    
-96    176    
144    368    
144    192    
-128   144    
64     288    
-16    32     
-16    64     
-32    272    
96     240    
-128   176    
96     832    
32     352    
-144   544    
112    160    
-64    -176   
112    -64    
-80    -64    
-48    -16    
32     -48    
-16    32     
96     -48    
112    224    
-96    96     
64     48     
112    48     
-16    0      
112    224    
16     -384   
16     16     
-16    0      
144    112    
128    144    
80     112    
80     -176   
-96    -32    
256    -448   
-16    96     
32     0      
-16    144    
-352   -192   
352    -496   
-80    96     
304    -1024  
0      272    
-16    128    
80     64     
32     -32    
96     0      
-32    -128   
32     -16    
192    128    
48     80     
176    32     
32     -96    
96     16     
144    -112   
-16    80     
96     -144   
48     32     
-224   -48    
16     32     
-48    -112   
-80    48     
-48    -80    
224    176    
-16    64     
-64    112    
-96    -48    
256    -96    
128    192    
160    -32    
96     112    
64     -32    
320    576    
-368   -1328  
80     -80    
-192   -480   
64     48     
0      -272   
32     272    
0      48     
208    32     
64     80     
-16    192    
288    224    
48     -32    
-80    -16    
-48    -128   
112    32     
0      -560   
304    240    
256    -272   
-176   32     
-176   -128   
-192   -96    
128    112    
-144   272    
-128   128    
112    -32    
-32    48     
192    -64    
-32    -160   
96     -480   
-16    64     
0      -224   
160    32     
32     -144   
16     112    
-160   112    
208    240    
-128   32     
32     -64    
-240   304    
288    -496   
16     336    
112    -160   
-320   -64    
400    16     
32     128    
-16    -192   
48     16     
16     -128   
-48    16     
80     48     
112    64     
-144   -128   
160    -128   
-160   -768   
96     -80    
32     144    
-160   -176   
32     192    
160    -224   
-16    112    
80     -368   
32     112    
-128   -32    
0      -320   
176    64     
48     -464   
240    160    
-368   48     
80     -400   
64     16     
32     -384   
112    -16    
-48    448    
272    80     
-48    128    
48     0      
80     -48    
144    192    
144    -16    
-96    32     
208    -48    
-144   -304   
-1568  -32    
32     -192   
128    80     
96     -32    
-208   -80    
192    -1696  
-64    -96    
208    144    
-96    96     
80     0      
-48    112    
-64    -160   
112    32     
-224   -64    
96     -16    
0      -32    
-16    -32    
256    -112   
-48    -160   
96     -192   
-128   -224   
160    -96    
384    -736   
-384   80     
-64    -112   
192    176    
-48    -64    
16     -144   
80     -144   
96     -272   
-400   -176   
112    -112   
32     -224   
192    32     
-32    128    
0      -320   
-32    -144   
80     -704   
96     176    
-16    192    
-64    -176   
32     -304   
128    -128   
-96    224    
384    112    
-336   32     
80     -336   
48     80     
-96    32     
48     -80    
96     -400   
64     -16    
-16    -368   
192    352    
112    32     
-32    272    
-240   112    
144    16     
-128   144    
-144   -336   
-192   -48    
80     112    
224    64     
48     448    
-224   -224   
224    -112   
-128   48     
80     -128   
64     128    
80     -352   
0      112    
96     112    
-288   64     
144    -288   
-16    816    
-48    -272   
-112   -304   
-192   -64    
64     -112   
-464   96     
64     -416   
-32    144    
208    256    
-176   -336   
-16    -544   
0      400    
0      368    
-208   128    
-368   -272   
224    -272   
-368   -432   
400    -16    
-208   176    
304    448    
-32    160    
144    -240   
-16    -32    
48     -368   
256    240    
96     -416   
-16    -144   
144    96     
368    176    
128    464    
-240   -416   
192    -160   
0      64     
-112   -32    
208    160    
112    128    
64     48     
480    368    
-176   -48    
0      160    
208    -128   
272    -112   
48     416    
-576   -112   
16     -32    
-32    -64    
160    -336   
96     144    
224    528    
-496   -832   
112    -528   
-48    176    
224    544    
-320   -80    
16     -32    
96     64     
-320   336    
-144   400    
-368   -832   
432    -224   
-1440  912    
480    -160   
-560   -528   
-96    -144   
32     -192   
224    384    
-112   -64    
-480   -960   
144    -160   
80     912    
0      -144   
80     -32    
-96    32     
-32    144    
112    0      
-576   -400   
-112   -352   
-944   432    
-112   64     
-464   -352   
224    64     
-128   16     
48     400    
-48    -32    
-32    368    
0      -64    
-48    336    
-128   -16    
416    -128   
-208   192    
-224   -48    
-112   -16    
-352   -320   
64     160    
128    16     
304    320    
-256   112    
160    -224   
-128   96     
16     -160   
-48    -224   
208    208    
-208   -64    
0      -240   
-80    96     
16     -32    
-48    -208   
-192   0      
-48    272    
-352   -304   
288    240    
-144   80     
-16    -304   
64     208    
48     304    
0      160    
-32    -176   
-96    -400   
0      -32    
224    592    
-16    240    
-64    -16    
-48    -432   
48     -192   
-288   416    
-48    -16    
32     -320   
80     208    
96     240    
0      192    
96     -160   
-64    32     
-48    -48    
96     -48    
-64    -80    
176    -48    
-112   -32    
96     -16    
-48    192    
-32    48     
-64    64     
128    16     
144    80     
-336   -32    
-160   -48    
80     16     
-32    -48    
-112   -224   
-48    64     
112    -64    
-224   -64    
32     80     
-320   -64    
32     48     
-448   16     
-48    144    
-80    16     
-64    -128   
160    112    
-16    48     
-48    96     
304    336    
-112   176    
-112   80     
0      32     
-64    32     
160    240    
48     112    
-64    64     
-128   32     
240    112    
-112   48     
48     -48    
48     112    
96     96     
-80    112    
-48    0      
-160   -224   
-64    -144   
208    64     
-272   0      
224    112    
-96    -112   
48     96     
-112   -144   
48     32     
-48    32     
80     192    
80     64     
-16    16     
64     64     
16     32     
48     32     
32     64     
-48    -144   
80     -432   
16     16     
352    144    
-288   112    
160    64     
-32    176    
160    288    
16     32     
48     -32    
112    -112   
192    352    
-304   64     
64     32     
32     128    
0      160    
-160   48     
128    112    
-352   -64    
208    144    
64     496    
176    304    
16     256    
-48    144    
160    240    
-96    -16    
112    -16    
48     64     
160    -32    
-160   -48    
144    128    
-48    -32    
-240   -336   
48     -240   
352    160    
16     128    
-144   64     
32     80     
0      160    
64     96     
160    256    
80     0      
-32    48     
-32    384    
336    -128   
-160   -64    
160    -176   
-96    -208   
-192   -160   
128    -1392  
0      48     
-16    16     
48     256    
96     112    
-96    -128   
32     96     
128    96     
96     80     
64     96     
336    416    
-256   144    
224    128    
-160   64     
16     -128   
-16    -800   
256    96     
-64    -112   
336    0      
-224   48     
544    112    
-336   112    
352    144    
-160   16     
-144   176    
16     48     
0      112    
0      80     
-64    80     
-80    176    
208    -560   
-96    80     
160    80     
112    160    
-288   64     
0      0      
64     112    
128    80     
-96    48     
176    256    
0      -32    
-128   80     
128    -16    
-32    80     
80     48     
-64    -64    
48     -32    
48     -320   
32     64     
48     32     
48     144    
64     -128   
64     0      
80     128    
-64    80     
96     64     
0      96     
16     -16    
96     32     
160    64     
128    -144   
144    272    
-144   -96    
64     64     
32     16     
96     192    
-32    96     
-64    80     
-16    80     
240    128    
96     -48    
32     -16    
-48    176    
80     -144   
80     256    
-112   -272   
-16    -368   
32     -144   
160    256    
-48    -336   
48     160    
-48    -352   
48     144    
192    -80    
-160   -112   
80     96     
32     0      
64     -32    
144    -144   
48     64     
128    -16    
48     96     
64     -112   
128    48     
32     -240   
96     80     
32     96     
16     80     
176    224    
160    -48    
-96    -128   
-32    -480   
128    544    
304    256    
-288   64     
368    -176   
-32    512    
112    -480   
-160   240    
176    -48    
-128   224    
48     48     
80     256    
-48    -48    
112    48     
-112   240    
80     -256   
-16    48     
80     -272   
64     -16    
96     -480   
96     208    
192    96     
-80    256    
160    -256   
144    16     
0      96     
112    80     
-48    -64    
208    208    
-208   192    
192    -112   
48     320    
208    320    
144    288    
-16    16     
96     80     
80     -112   
80     64     
48     -112   
64     112    
80     16     
-32    -2160  
16     16     
0      -304   
144    -144   
16     0      
80     -320   
32     0      
96     -1328  
112    0      
0      128    
64     416    
144    400    
-96    0      
32     -848   
48     48     
48     -64    
-160   -48    
0      -176   
-112   -1136  
-864   -464   
112    -640   
-352   -288   
0      -160   
0      64     
112    -1536  
-80    -96    
-464   -240   
160    -32    
-160   -208   
-144   80     
224    288    
-288   80     
48     -176   
-240   16     
-608   -192   
-64    -368   
-400   -464   
-32    -128   
-320   -64    
336    -1104  
112    400    
80     384    
64     208    
112    -16    
-16    -352   
304    -224   
-16    272    
48     -64    
256    160    
-192   144    
112    -128   
48     -272   
-16    -80    
-64    144    
16     -320   
272    -224   
-48    -80    
-416   -288   
112    -320   
288    -208   
160    384    
160    224    
48     -176   
80     -32    
-336   240    
-176   -32    
-1888  -448   
240    80     
48     -48    
96     32     
240    -16    
32     -384   
32     0      
176    -128   
-32    64     
-128   -352   
336    -240   
-256   528    
528    -560   
-96    -352   
128    768    
0      736    
-96    192    
192    -176   
64     -144   
96     64     
80     -304   
-32    0      
160    -1072  
-128   160    
48     352    
64     64     
-48    144    
-48    -96    
272    128    
-208   48     
-96    208    
80     -16    
48     112    
-176   0      
-160   128    
32     0      
80     128    
192    96     
-80    0      
224    224    
-16    -16    
192    272    
-128   144    
16     64     
80     208    
-112   112    
-176   -256   
-176   0      
-144   -240   
-48    -48    
-16    -176   
256    240    
32     -1088  
0      -176   
-48    96     
-32    0      
-112   -64    
16     -48    
-240   -112   
0      -16    
-272   0      
48     32     
48     416    
32     80     
-32    64     
-16    -112   
96     64     
96     -64    
-64    -64    
112    -16    
160    -16    
-80    64     
144    -96    
-208   -208   
288    -48    
-176   -128   
112    -240   
-96    -64    
-720   -272   
64     -16    
-432   -288   
80     176    
128    160    
-384   144    
16     -96    
-928   0      
-160   -160   
208    -288   
-96    80     
352    288    
-336   0      
96     -32    
-32    48     
-912   16     
-240   0      
-64    -112   
224    96     
-80    32     
32     48     
16     -32    
-144   -80    
-32    16     
-352   64     
-48    80     
0      64     
-96    48     
192    0      
32     96     
-32    48     
48     144    
0      -16    
-144   0      
112    96     
-208   -16    
32     48     
-96    48     
-64    80     
-224   48     
0      128    
-928   -32    
-80    -192   
32     64     
144    64     
-224   -48    
304    144    
-96    -64    
-176   -80    
112    -144   
-432   128    
256    176    
-80    32     
-32    -128   
-416   -160   
48     -240   
-320   -96    
16     -64    
-208   -160   
32     16     
-128   -112   
128    64     
-80    160    
96     560    
-240   160    
32     112    
-48    -16    
-32    32     
0      16     
-176   -32    
224    160    
-240   96     
-176   208    
-800   -160   
96     32     
-48    -64    
-64    -32    
48     -80    
160    0      
32     64     
128    64     
-96    64     
-16    96     
0      144    
32     -48    
32     48     
112    -16    
-64    80     
-448   -224   
272    0      
-32    64     
96     144    
-176   96     
208    -48    
160    240    
-208   -32    
-16    -64    
112    80     
-112   0      
160    -32    
-80    48     
-48    -96    
-144   32     
-80    128    
240    64     
-16    160    
32     -32    
-144   32     
-32    288    
176    -160   
-96    -144   
240    96     
-16    336    
96     -48    
-48    48     
-48    64     
-96    -64    
-32    96     
0      16     
16     144    
-32    48     
-16    112    
192    16     
-128   -32    
112    128    
160    64     
96     80     
-112   128    
48     16     
-208   -64    
256    80     
-96    128    
112    0      
-464   64     
208    112    
16     80     
-16    96     
-80    48     
-112   272    
144    0      
-64    -64    
16     -32    
-80    96     
208    336    
96     176    
-128   80     
-112   -80    
144    160    
-400   -80    
144    16     
-112   80     
-16    96     
-80    64     
64     48     
-176   80     
-320   176    
160    -16    
-112   -80    
192    176    
-144   224    
-96    112    
80     -48    
-176   96     
-16    -64    
-48    48     
32     96     
-16    16     
-16    224    
-48    -32    
-64    -64    
112    -16    
-96    128    
-48    64     
128    -176   
-48    320    
304    272    
-288   -96    
128    -80    
-112   -384   
-80    0      
128    128    
16     -528   
128    352    
-64    -160   
-16    272    
112    176    
-64    -448   
32     48     
0      304    
128    224    
16     752    
192    -592   
-176   256    
160    -144   
96     112    
0      448    
192    -80    
-240   32     
240    112    
64     112    
-32    32     
-176   112    
176    48     
-48    64     
64     48     
32     128    
-64    48     
80     -400   
64     160    
-112   0      
288    208    
-112   320    
208    208    
-80    32     
144    208    
48     160    
16     160    
112    320    
128    160    
-112   224    
96     48     
-368   -224   
304    -528   
-64    128    
160    96     
-48    112    
128    80     
-16    48     
-48    48     
96     48     
-48    -48    
-48    -336   
64     -16    
288    176    
-272   -192   
32     32     
48     64     
256    -432   
-48    160    
32     -304   
80     -528   
224    -48    
-192   -96    
-64    -448   
-80    -48    
96     144    
16     0      
-176   176    
224    80     
-224   16     
96     -144   
-64    112    
16     -48    
32     80     
-48    -1024  
112    -16    
-64    96     
160    144    
-48    0      
16     -64    
80     -256   
16     144    
-128   64     
48     192    
32     224    
-32    -112   
272    288    
-144   -240   
80     48     
32     -16    
288    368    
-368   -1440  
112    -16    
-32    -304   
-192   176    
0      -112   
48     -48    
112    64     
-32    384    
240    176    
16     192    
-48    240    
112    -320   
0      96     
-96    -64    
640    560    
-544   96     
0      208    
64     -384   
96     -80    
-352   544    
160    192    
32     -80    
-32    64     
256    336    
-128   128    
128    0      
-48    -16    
224    384    
-176   -80    
32     -176   
144    -176   
-96    384    
112    -80    
112    272    
112    256    
-144   160    
320    208    
-16    80     
352    272    
-48    80     
-16    144    
-32    -160   
0      272    
32     -224   
32     -128   
-112   -464   
112    -128   
160    32     
-400   -448   
112    -208   
32     80     
-160   -160   
0      -64    
208    0      
-224   16     
176    112    
-208   -32    
48     16     
16     -336   
96     -32    
32     -64    
-64    80     
-80    -64    
0      144    
-32    80     
0      -928   
80     -1584  
96     304    
32     -1584  
80     416    
-48    368    
-112   -96    
224    112    
-80    -16    
96     144    
16     -16    
112    -1136  
-192   -128   
528    -176   
-176   112    
304    128    
-112   -32    
288    -144   
-32    -928   
80     -160   
0      -1648  
112    -96    
128    -672   
128    -16    
144    112    
-112   -320   
64     -448   
32     48     
112    -128   
176    32     
-208   -96    
96     -16    
-144   32     
80     -256   
160    -64    
176    176    
96     0      
128    -496   
144    -96    
176    48     
-80    16     
160    -80    
96     64     
160    48     
96     -80    
-80    -16    
112    -112   
-144   -48    
-48    -128   
96     -64    
176    -160   
-32    -112   
96     -80    
128    64     
0      -1072  
-32    144    
208    96     
-96    32     
16     -16    
-48    -224   
16     160    
96     -80    
-80    -16    
368    96     
32     -48    
16     -272   
160    16     
-32    -624   
48     16     
-96    -160   
176    112    
-48    -64    
112    128    
-80    -128   
0      48     
112    32     
-208   -32    
-368   32     
160    256    
-256   -32    
-16    -128   
480    144    
-32    -32    
-144   -32    
288    -512   
96     176    
80     -48    
-64    80     
48     64     
16     -64    
-32    96     
-16    -272   
96     16     
128    -96    
-112   32     
96     -80    
-64    128    
32     -336   
16     48     
80     -320   
64     96     
-16    -944   
-32    96     
208    112    
-240   -240   
16     -32    
64     -128   
-304   112    
160    32     
128    208    
-288   -96    
-112   -224   
368    -336   
-176   160    
208    -112   
144    112    
48     -528   
112    -96    
-112   80     
16     -128   
-48    -192   
-48    -352   
112    -144   
144    16     
-80    0      
176    32     
-256   -48    
224    -16    
-112   144    
240    32     
304    192    
-96    -128   
80     -112   
-32    80     
128    32     
-208   32     
128    48     
-176   -288   
64     -176   
128    48     
-208   0      
-32    112    
128    0      
32     144    
64     -48    
48     -16    
-16    0      
-960   176    
-240   144    
-1088  -112   
192    144    
16     64     
-288   -144   
64     -48    
-144   48     
176    -32    
-224   80     
-848   -256   
-96    112    
-368   -400   
96     96     
432    400    
-176   496    
-176   32     
-112   32     
-80    -16    
336    128    
-224   96     
0      64     
112    64     
-336   -112   
240    208    
-400   -16    
176    128    
-240   -48    
-32    -16    
-48    64     
0      144    
-288   64     
-448   -112   
64     112    
-48    0      
-64    -128   
-1024  64     
352    160    
-352   32     
-32    -32    
-224   -80    
416    192    
-208   80     
48     16     
-32    80     
-112   48     
-48    64     
64     112    
112    112    
-144   16     
-144   -144   
-64    -80    
-96    -16    
-112   -112   
368    272    
-256   128    
-96    176    
-16    16     
0      -16    
-48    0      
64     -96    
0      16     
96     0      
112    128    
32     16     
-144   416    
144    480    
-64    352    
-304   -192   
112    96     
-48    -240   
-96    48     
-64    -416   
256    -32    
-48    128    
0      80     
-16    80     
-144   -16    
16     32     
-160   -256   
128    192    
32     608    
-32    240    
-864   0      
-176   -320   
-64    16     
-16    -320   
96     224    
-256   432    
-96    -256   
64     -144   
-128   224    
-208   -16    
16     -96    
-16    64     
0      80     
-64    128    
48     64     
-640   16     
224    384    
-320   -32    
48     272    
144    144    
16     256    
-112   -64    
112    32     
-16    -32    
80     96     
112    112    
-192   32     
80     48     
-160   -64    
160    96     
-416   0      
192    128    
0      64     
-32    16     
-16    80     
-112   -32    
176    112    
-128   112    
32     0      
144    -128   
0      64     
-160   -96    
144    -176   
-32    -32    
112    144    
-256   96     
144    144    
-16    64     
-80    32     
-48    16     
-32    352    
96     112    
-128   -64    
112    -48    
48     96     
-96    0      
0      -32    
64     112    
-64    16     
64     -32    
-224   16     
144    112    
64     96     
-32    96     
16     96     
0      -16    
192    -32    
-96    128    
80     64     
16     192    
144    160    
0      112    
-176   112    
-64    -16    
48     160    
-208   0      
64     48     
-176   -144   
112    -192   
352    432    
-128   416    
-224   0      
112    -32    
-48    112    
144    48     
-96    160    
144    16     
-160   -96    
128    -160   
-16    704    
224    560    
-240   -144   
-16    -112   
-128   -288   
16     -208   
48     176    
16     320    
16     -128   
368    944    
-160   384    
352    -48    
-400   -288   
112    96     
-64    -80    
-32    0      
64     528    
80     -176   
64     240    
-64    256    
16     80     
16     208    
-32    -128   
192    80     
96     128    
48     32     
80     288    
208    240    
64     192    
48     208    
112    -112   
-176   176    
64     64     
96     48     
-112   -256   
128    -320   
48     -80    
96     112    
-48    48     
-16    128    
240    224    
-384   48     
160    0      
-192   -16    
-208   -240   
0      -816   
160    -112   
144    16     
-208   -144   
32     128    
96     128    
-48    96     
64     64     
0      112    
0      -16    
-48    -160   
240    160    
-80    64     
80     32     
432    0      
-640   -608   
224    -144   
-128   208    
0      128    
288    96     
-544   112    
528    112    
-688   96     
336    64     
-128   144    
176    32     
80     208    
-48    48     
-32    160    
112    112    
112    -80    
-64    208    
80     -496   
-112   16     
160    112    
192    144    
-112   208    
48     48     
-32    128    
240    112    
-16    64     
128    0      
16     -48    
160    64     
464    256    
-496   -64    
288    48     
-64    -640   
48     208    
-128   -1280  
16     192    
-16    -128   
176    192    
-304   -272   
96     80     
-80    -16    
96     112    
16     128    
-48    -96    
128    0      
240    -144   
-16    96     
160    -288   
144    112    
-32    -368   
128    160    
192    -64    
16     16     
96     112    
176    96     
64     160    
16     160    
32     -64    
32     -96    
48     192    
48     -144   
-32    96     
96     -160   
64     96     
-32    -576   
48     -208   
-64    -208   
240    32     
-64    48     
144    80     
-112   112    
96     48     
48     160    
48     -16    
0      16     
-64    -256   
240    160    
-80    -288   
672    528    
-656   -544   
160    -32    
0      32     
112    192    
0      -64    
-32    112    
-64    32     
192    -448   
80     128    
16     -224   
-80    48     
192    -144   
-64    112    
-48    -224   
96     192    
-64    -272   
32     -48    
80     -48    
32     112    
-240   -368   
176    272    
-48    -96    
-96    48     
192    112    
-48    -64    
-16    64     
112    -304   
64     112    
48     -224   
96     96     
128    -80    
16     112    
80     -80    
0      -624   
0      16     
32     -848   
-48    -416   
144    64     
-48    -96    
16     -96    
112    -480   
96     -208   
32     32     
96     -64    
208    64     
-128   16     
0      -112   
48     64     
544    -192   
-560   192    
-32    -176   
176    16     
160    -80    
192    -80    
16     -240   
112    -96    
256    -16    
-128   -16    
80     -48    
32     -48    
128    -96    
0      -160   
-32    64     
160    -160   
-48    0      
144    -32    
16     0      
-672   336    
-192   64     
-32    -48    
112    -256   
64     16     
48     -624   
16     16     
16     -544   
-112   -64    
112    -48    
32     160    
-144   48     
48     128    
-144   -144   
96     0      
-192   32     
-112   -48    
384    160    
-288   -128   
-112   -400   
224    16     
-32    48     
-96    -768   
112    -96    
448    416    
-176   448    
-176   -96    
-16    80     
-176   -80    
112    -96    
-256   112    
-16    -368   
-944   -592   
320    -304   
-16    16     
0      16     
192    208    
-320   -240   
192    192    
16     -224   
-16    80     
-16    -112   
352    224    
288    256    
-96    96     
96     48     
0      -112   
-336   -320   
192    -160   
48     384    
96     128    
-112   80     
-320   -512   
16     -32    
48     -352   
288    96     
-176   32     
-32    -48    
-96    -208   
32     -400   
-64    -384   
-48    -208   
-96    16     
-96    0      
-128   32     
64     -48    
64     -32    
64     -272   
-256   -320   
464    -192   
112    336    
-80    256    
128    224    
-32    80     
-32    -80    
-112   -112   
224    480    
-48    16     
-80    160    
48     112    
80     -224   
-48    160    
64     -240   
-176   128    
16     -704   
192    144    
-176   160    
-80    -144   
-32    160    
96     -16    
0      32     
96     32     
-160   -32    
96     -144   
-144   -80    
16     -176   
112    112    
288    -16    
-32    112    
-176   -224   
-768   192    
-128   464    
208    -256   
-208   -32    
48     176    
-64    -96    
-48    -160   
-16    -128   
-144   -384   
96     -400   
-624   -96    
128    0      
-624   -336   
160    80     
-64    -96    
-304   96     
64     -160   
-96    128    
-64    112    
-784   -176   
48     336    
32     112    
64     32     
128    -240   
352    176    
-464   -64    
128    64     
-32    0      
-16    32     
-48    48     
-48    64     
144    96     
-688   -32    
0      48     
-288   -48    
272    160    
-208   128    
16     256    
128    64     
-240   -96    
-32    32     
-32    208    
32     0      
176    96     
-96    128    
-48    64     
-16    160    
-160   -288   
0      -128   
-224   -64    
80     -336   
-224   -128   
-32    32     
-128   -144   
32     288    
-176   -32    
128    32     
-96    48     
32     -208   
-112   -80    
48     144    
-128   -16    
-48    16     
-64    96     
32     0      
-416   -352   
240    -512   
48     416    
304    512    
-240   144    
-32    -496   
416    352    
-112   1024   
-32    -192   
-112   -80    
64     0      
32     128    
-176   -128   
48     96     
-16    64     
-128   -64    
-368   -304   
112    208    
-816   -32    
16     80     
80     96     
80     112    
-192   -192   
-192   -240   
96     192    
256    528    
-144   16     
0      -144   
272    288    
-352   32     
112    192    
-128   96     
192    768    
-176   256    
-144   272    
160    240    
96     48     
-16    64     
-48    112    
16     16     
208    128    
-160   -64    
-16    144    
32     16     
-16    320    
176    -80    
-160   -32    
208    144    
-416   80     
-16    144    
-16    64     
32     -64    
48     0      
-160   448    
320    -256   
-160   -16    
320    272    
-272   96     
-128   0      
224    80     
-208   48     
-48    64     
-256   -48    
-256   -352   
480    -400   
-16    0      
96     16     
-48    48     
32     16     
-128   112    
64     80     
32     -16    
80     144    
-192   80     
-176   -64    
-96    -32    
-64    -64    
16     64     
-208   -32    
144    -128   
144    160    
64     80     
-112   176    
-144   -64    
-432   -96    
192    96     
-48    176    
160    144    
-176   16     
-64    32     
80     112    
-144   32     
352    240    
-16    64     
-240   144    
176    112    
160    16     
-128   -16    
-96    96     
48     160    
32     64     
16     112    
64     112    
-16    160    
-176   32     
352    192    
48     176    
160    112    
-80    96     
80     272    
128    208    
-224   144    
112    144    
-48    80     
-16    144    
-176   -16    
112    160    
0      128    
48     368    
-128   192    
-96    80     
96     -64    
224    32     
96     32     
208    96     
-176   48     
176    32     
-64    0      
160    -144   
112    112    
112    48     
-16    32     
240    176    
-176   80     
64     96     
-64    96     
-16    32     
48     -192   
-16    32     
288    48     
-80    144    
0      -208   
64     -128   
64     176    
176    32     
-96    112    
32     64     
-128   -16    
16     48     
-32    -48    
-32    192    
240    -16    
-48    -480   
32     192    
96     64     
-80    96     
-16    48     
80     32     
128    80     
-80    96     
0      0      
112    240    
-320   -128   
32     0      
128    224    
32     160    
-160   -96    
96     -1120  
416    64     
-400   192    
112    -64    
48     96     
16     -32    
64     144    
64     80     
-16    16     
48     32     
96     64     
128    128    
32     0      
80     96     
384    432    
-496   -160   
96     144    
176    -64    
48     96     
0      80     
-16    112    
144    48     
-96    112    
144    192    
-112   208    
48     -64    
128    144    
-144   -48    
160    -176   
-64    192    
0      -224   
64     160    
96     -768   
32     208    
192    112    
-112   32     
48     16     
16     128    
16     32     
-32    80     
48     176    
96     176    
-192   -32    
208    -16    
-192   0      
144    -112   
-16    48     
112    -400   
112    128    
-160   -256   
96     224    
64     112    
-144   -224   
32     -144   
112    96     
-192   0      
336    -16    
336    544    
-432   144    
272    16     
-192   32     
48     368    
176    -64    
-192   -288   
272    -320   
32     0      
16     160    
240    160    
-32    48     
128    32     
-112   -96    
208    -32    
192    0      
160    -32    
112    48     
48     -768   
224    32     
48     -432   
128    -32    
128    -112   
-64    128    
96     -1056  
-80    160    
-224   -272   
96     -32    
-256   -560   
176    240    
16     112    
16     -160   
224    272    
32     -112   
0      96     
320    -128   
-160   176    
32     192    
32     -64    
80     16     
128    96     
-48    112    
-32    -128   
144    144    
128    80     
-144   224    
48     -368   
384    896    
32     432    
-160   -320   
112    -96    
208    240    
-192   -288   
224    128    
-160   384    
144    0      
208    352    
-320   -832   
112    -560   
-16    32     
224    -464   
48     32     
96     -736   
-112   -592   
-96    592    
64     -1024  
-16    272    
48     96     
0      -672   
32     16     
32     -416   
0      -80    
128    -608   
288    208    
-64    128    
208    -528   
-16    -192   
48     -512   
176    64     
128    384    
112    -288   
32     144    
-16    240    
288    -848   
0      368    
-80    -304   
48     96     
240    464    
-368   -720   
-784   -272   
288    48     
-32    -64    
64     -176   
112    -352   
-64    -16    
368    0      
-224   -368   
176    0      
80     -32    
-32    96     
256    80     
-176   -80    
-128   -656   
-144   -432   
-256   240    
224    48     
-208   -48    
112    32     
192    -16    
-208   -176   
208    -128   
-64    -2944  
-240   416    
192    -112   
-144   80     
128    -208   
-48    -624   
0      -128   
0      32     
-272   -192   
256    -64    
-1536  32     
400    336    
-256   -160   
96     64     
-400   -400   
400    -384   
-80    736    
128    128    
160    80     
16     0      
-48    -128   
-144   32     
384    -64    
32     0      
32     -112   
-640   32     
112    -96    
224    0      
64     -192   
48     32     
272    -304   
-80    176    
112    -256   
-224   -80    
-192   -544   
96     -160   
-80    464    
80     -624   
-112   0      
96     528    
-496   -288   
80     -128   
-512   112    
32     -400   
144    16     
288    -16    
-192   176    
208    -1040  
-32    96     
-64    -224   
128    160    
176    192    
-80    48     
-336   -288   
240    -64    
-208   32     
128    -16    
-80    64     
-16    -112   
16     -112   
144    -240   
112    736    
-96    -336   
-32    -240   
-128   32     
416    528    
-304   32     
112    -48    
-192   -112   
192    80     
-192   16     
48     -176   
-240   96     
-32    -256   
-320   -480   
176    -496   
176    16     
-16    -112   
304    -80    
-352   176    
256    80     
-224   -192   
288    -400   
48     -160   
80     -64    
-192   -64    
224    -80    
-144   32     
224    32     
0      144    
-656   -144   
112    0      
-208   -32    
-592   -176   
-288   -16    
-32    176    
-112   -16    
208    64     
-16    -16    
176    128    
-192   -32    
-240   32     
-32    96     
-240   -32    
-128   -64    
32     -48    
-32    48     
-160   64     
-176   16     
-64    80     
-96    -112   
32     -112   
-464   144    
-192   -160   
224    -288   
-272   160    
304    80     
-128   144    
32     -32    
96     48     
-16    -144   
-80    -64    
64     -112   
-80    160    
16     304    
272    368    
-176   64     
64     -64    
-208   32     
-448   -144   
16     -16    
160    96     
96     64     
-16    -224   
224    48     
272    16     
0      64     
-16    -48    
16     -80    
48     48     
-64    48     
-304   -64    
-80    16     
288    -112   
-144   -176   
-32    -48    
-208   128    
176    208    
48     144    
48     304    
192    272    
-112   80     
336    320    
-224   128    
-224   0      
96     -64    
192    224    
-224   64     
-112   16     
-512   -192   
-272   -192   
-192   -352   
80     96     
112    0      
256    256    
80     -48    
16     32     
32     -32    
-112   16     
224    32     
16     0      
-16    32     
-272   -128   
-192   -80    
-144   -96    
0      112    
-512   -16    
-16    32     
32     -48    
144    64     
-320   -32    
112    80     
-48    -96    
208    -192   
80     192    
176    48     
-192   16     
96     32     
64     16     
-176   -80    
64     16     
-160   80     
-16    112    
16     -144   
-256   -176   
0      112    
-48    80     
-128   64     
48     64     
80     192    
0      48     
-176   -80    
-16    16     
208    112    
-256   0      
208    128    
-320   -48    
96     64     
80     32     
-96    -32    
16     96     
-32    32     
-240   -544   
224    -32    
-96    112    
-16    16     
-64    32     
0      32     
16     64     
-224   -96    
208    80     
-288   16     
192    112    
-128   16     
256    112    
-48    160    
-16    -48    
0      96     
272    208    
-144   224    
192    112    
-288   -224   
32     -192   
16     0      
-64    -80    
-32    64     
48     -80    
80     128    
176    384    
-32    128    
-144   -112   
96     176    
176    -32    
-32    96     
80     -16    
-96    80     
48     -48    
-48    -128   
272    224    
-336   256    
112    416    
-224   -32    
32     112    
-112   -368   
16     -16    
272    752    
-96    352    
0      224    
96     336    
-64    368    
-112   80     
160    192    
-272   48     
80     496    
16     192    
-80    192    
128    -128   
-64    128    
160    208    
16     80     
144    64     
-80    144    
-64    -432   
-48    -80    
-16    176    
0      256    
-32    112    
16     96     
112    96     
-208   -352   
112    352    
64     256    
-112   -48    
96     -608   
128    448    
-80    -176   
64     -384   
224    800    
-112   -80    
112    -352   
32     560    
224    -992   
-112   240    
160    112    
-176   -16    
96     -1472  
-176   16     
128    -560   
32     496    
112    272    
-160   -304   
64     16     
176    624    
-48    16     
80     96     
-48    0      
96     352    
-384   -384   
224    144    
-80    256    
240    -608   
-16    640    
-112   -496   
192    224    
80     224    
-16    -80    
64     160    
-48    64     
128    -48    
-112   -112   
48     32     
224    96     
-192   -144   
64     -64    
-96    32     
208    -256   
-272   -48    
288    704    
80     640    
304    32     
-32    16     
352    544    
-112   192    
-352   -464   
32     -160   
112    32     
336    240    
-176   112    
208    272    
48     16     
336    -336   
-128   96     
-96    -720   
272    256    
-304   -80    
-48    -160   
-112   -416   
-256   -400   
416    80     
160    432    
-112   16     
-304   -624   
288    -128   
-144   16     
128    -32    
128    112    
-48    -304   
-192   0      
352    -64    
160    640    
-192   -448   
-48    64     
304    208    
-112   16     
-16    336    
176    256    
-64    192    
-80    16     
-32    -128   
48     -224   
-96    -128   
96     544    
192    -496   
-224   112    
-32    -32    
144    144    
-192   176    
-16    208    
-64    -368   
48     80     
-32    96     
-16    64     
16     64     
64     -64    
32     176    
-112   -288   
544    288    
-272   -608   
-80    -304   
-160   -1104  
720    1360   
-224   352    
224    -720   
-272   608    
32     -560   
144    144    
-352   -464   
256    -368   
160    336    
-304   -272   
384    -624   
-144   -80    
48     272    
224    48     
0      0      
64     128    
368    48     
-272   144    
-64    -192   
0      96     
128    -160   
32     256    
-16    -16    
224    -112   
32     176    
0      -512   
144    208    
-128   16     
176    64     
48     -224   
160    112    
-32    -688   
80     112    
32     48     
-16    -256   
-48    -1264  
-32    -416   
-16    -304   
-128   -352   
304    656    
0      48     
-32    -384   
48     -160   
48     -144   
-48    -304   
96     208    
16     -64    
-48    -448   
192    0      
-32    -16    
192    -432   
48     -160   
240    -160   
-16    -48    
-48    -624   
96     -112   
16     208    
-32    -48    
368    144    
-144   -48    
64     -64    
80     240    
128    -80    
-80    80     
-48    -32    
32     -96    
-304   -32    
240    -176   
-176   -80    
256    -832   
96     -48    
112    -2432  
0      -128   
144    -128   
64     -32    
160    64     
32     0      
48     -64    
-16    64     
32     -16    
-272   -16    
-320   -96    
-80    -320   
160    -96    
128    -128   
-32    -64    
-208   -432   
64     -192   
144    -160   
-32    208    
240    32     
-192   80     
208    64     
-80    240    
144    80     
96     -64    
-160   -240   
176    -48    
96     80     
80     0      
0      -16    
32     -64    
112    -144   
16     -560   
16     64     
96     -128   
0      32     
256    -16    
64     -48    
-80    240    
272    -32    
-416   -112   
224    -224   
-144   48     
80     -64    
64     -176   
-208   -144   
192    -16    
-96    -208   
96     48     
64     0      
-16    144    
-96    -128   
-32    -240   
128    32     
-192   0      
128    144    
-32    304    
-544   208    
176    768    
-912   208    
-240   -352   
-112   -144   
272    -128   
-48    -32    
-64    -2848  
352    -128   
112    96     
288    400    
96     48     
304    96     
96     -64    
80     -144   
-224   32     
80     -128   
-96    -48    
-192   -416   
32     256    
64     160    
0      416    
112    -432   
320    32     
-32    48     
-144   -64    
-48    16     
32     -32    
80     16     
144    -48    
-336   -128   
-128   -48    
240    -48    
-16    -112   
16     16     
-16    -336   
288    96     
-112   -688   
80     16     
0      80     
-96    -160   
-80    -80    
-208   0      
96     0      
0      16     
-128   -80    
288    -208   
-1600  48     
240    -224   
48     112    
208    -144   
-128   80     
128    112    
-656   64     
-144   16     
384    144    
-336   144    
32     48     
160    48     
-144   -272   
160    -32    
0      48     
-256   -16    
-1264  -64    
48     0      
64     -32    
96     160    
80     144    
-272   32     
-112   64     
-672   112    
-48    64     
-64    96     
48     0      
-48    -80    
-80    -64    
0      -144   
16     64     
160    -16    
80     128    
-64    -80    
-160   -80    
-80    0      
-64    -64    
-48    80     
64     32     
-64    128    
-32    112    
-48    -144   
208    -176   
112    64     
-16    -16    
32     192    
-16    -240   
-48    256    
16     -64    
-144   32     
-16    240    
224    96     
-272   16     
128    16     
-80    16     
80     176    
-208   160    
-16    224    
-16    432    
96     -16    
-48    112    
0      -336   
-64    -496   
-48    -560   
96     -144   
16     -192   
0      16     
240    336    
-384   -304   
-16    -208   
96     16     
-48    -160   
-32    -320   
16     352    
-1808  -64    
32     80     
80     160    
48     160    
0      -272   
80     192    
-16    256    
-48    -80    
32     176    
-176   -544   
128    48     
-256   -16    
-96    -1024  
64     -416   
-16    224    
-1056  112    
-112   528    
0      -160   
-64    -240   
160    160    
-176   0      
-16    -80    
-80    144    
0      96     
112    48     
-208   48     
-16    0      
-96    -160   
-192   -368   
-48    144    
32     32     
-48    80     
96     64     
-224   16     
16     80     
-64    0      
-288   -192   
272    -176   
-48    160    
80     176    
-16    112    
-96    -64    
64     0      
-224   -80    
112    80     
-416   -368   
192    80     
144    176    
64     0      
32     48     
0      -80    
192    80     
32     80     
-336   -80    
-80    80     
-416   144    
-16    -16    
208    112    
-224   -352   
144    0      
-320   -48    
-144   64     
-16    80     
-16    16     
144    128    
384    208    
-48    176    
-144   16     
64     -48    
160    -64    
96     -48    
-144   16     
224    48     
-336   48     
224    176    
-304   -176   
-128   -480   
160    224    
112    384    
-16    160    
-240   208    
160    16     
-16    -144   
-80    96     
240    176    
288    432    
-432   -160   
64     0      
-64    32     
-208   -16    
-112   96     
80     128    
64     272    
-128   -160   
-384   416    
80     -32    
-80    0      
-176   -320   
-80    112    
-32    144    
-112   0      
-112   128    
304    -144   
-64    144    
160    576    
-80    -208   
-240   -672   
-336   -1184  
320    256    
-176   432    
-48    112    
304    192    
-96    672    
112    48     
-256   160    
496    320    
128    1344   
-448   -336   
320    -512   
96     416    
64     16     
-96    -432   
16     16     
32     112    
32     96     
-112   -480   
-80    64     
240    96     
96     640    
112    144    
-112   -256   
112    256    
112    576    
-480   -112   
-64    -720   
0      224    
64     496    
48     304    
32     32     
-48    -48    
-64    -240   
112    -128   
144    -336   
0      -288   
80     96     
144    96     
-272   -496   
48     -16    
32     -112   
80     -656   
144    112    
80     48     
160    -48    
16     112    
32     224    
144    64     
80     160    
64     -80    
-192   -208   
272    32     
-128   112    
160    -48    
-128   16     
80     -48    
-80    -624   
32     -112   
160    -96    
-16    32     
16     48     
32     96     
240    192    
-144   256    
-16    128    
256    416    
-304   240    
112    240    
-224   32     
112    96     
144    288    
64     -640   
-96    -96    
-128   -2672  
352    144    
-192   144    
288    176    
-352   32     
0      64     
0      32     
32     144    
-96    -80    
-16    80     
16     -288   
-96    -160   
80     80     
-64    -240   
-80    -32    
272    -176   
-80    64     
-16    96     
16     96     
48     -16    
32     112    
0      -448   
16     -160   
160    128    
-144   384    
48     16     
128    -192   
32     160    
160    32     
-80    128    
32     -128   
176    128    
-256   -912   
160    96     
-64    -128   
144    112    
-48    80     
176    96     
-32    -48    
48     80     
96     112    
304    64     
-224   160    
64     -64    
32     80     
0      -288   
64     96     
32     -1184  
96     128    
240    -336   
-64    160    
16     0      
-32    -64    
-32    -80    
-16    -160   
-16    -32    
144    -64    
64     48     
240    -368   
48     192    
16     32     
112    160    
272    0      
-112   80     
48     32     
0      320    
304    272    
-256   112    
128    48     
160    -32    
-160   80     
80     -528   
-112   -144   
400    64     
-208   144    
0      32     
-32    128    
-64    80     
0      96     
128    32     
128    80     
-352   112    
176    64     
16     128    
0      -432   
-64    144    
64     -256   
-128   -16    
32     -240   
16     48     
144    -128   
80     112    
-80    -368   
-192   -160   
432    -144   
64     -864   
16     112    
48     -720   
352    -384   
0      16     
96     -16    
64     32     
192    288    
0      64     
112    0      
176    -176   
-48    96     
144    -80    
64     -640   
272    272    
-240   -272   
144    -80    
192    -464   
16     -816   
304    -48    
-16    -112   
208    32     
80     -480   
-64    -80    
256    -384   
32     -64    
208    160    
128    32     
-112   96     
400    48     
-32    -96    
64     -16    
-240   -96    
32     -96    
-288   112    
32     -16    
-16    -64    
0      -672   
-32    -240   
240    -720   
-16    -32    
160    144    
-32    32     
-32    -192   
144    208    
-32    -192   
64     -32    
48     64     
80     16     
-256   -96    
128    -32    
32     -128   
64     -96    
176    -48    
-144   32     
176    112    
-96    -688   
0      -112   
272    16     
96     128    
0      -48    
64     -16    
-48    -96    
144    -320   
-144   -208   
224    -256   
-144   64     
48     -112   
96     64     
240    32     
-320   -16    
-64    -208   
-96    176    
224    32     
208    128    
-80    -48    
32     -48    
-96    -80    
64     128    
-128   -64    
96     80     
32     64     
32     16     
272    96     
80     -208   
-176   224    
-32    -1408  
256    -496   
128    -368   
-128   -384   
-64    -176   
224    272    
-192   -80    
64     16     
16     16     
80     32     
-96    16     
16     -96    
-560   -80    
96     -80    
48     96     
48     -80    
-112   -176   
112    -704   
112    528    
400    304    
-288   464    
-80    -432   
16     112    
-128   -16    
80     -176   
-112   192    
208    -80    
-192   -48    
256    16     
-80    128    
192    -176   
128    192    
176    -416   
-32    192    
-224   160    
80     208    
-224   -192   
80     -64    
-224   -64    
176    -16    
-48    272    
-16    128    
16     -192   
-16    -176   
64     80     
80     -224   
-64    192    
-128   80     
192    0      
-240   -160   
0      -208   
-256   -304   
192    -128   
-336   32     
192    240    
-32    80     
32     16     
-224   48     
-1024  -48    
-224   0      
-144   -96    
-192   144    
256    64     
-384   0      
64     16     
-1584  -48    
-32    48     
96     32     
-272   -272   
224    -624   
128    -112   
64     32     
-160   48     
16     -80    
80     112    
96     64     
-16    288    
-160   240    
-480   96     
-16    224    
32     -80    
-144   -160   
48     -16    
-16    0      
-48    80     
144    112    
-240   176    
240    160    
-320   -144   
-32    176    
16     -384   
64     64     
-80    144    
256    0      
-48    224    
-16    64     
304    160    
64     0      
-208   -96    
-784   -560   
288    -96    
-16    416    
-64    -16    
160    -32    
-32    112    
48     -64    
64     16     
32     144    
80     512    
240    96     
-576   -160   
96     -64    
-496   48     
16     16     
-64    176    
144    288    
-320   192    
144    -544   
-64    -480   
704    912    
-416   -16    
64     -256   
112    240    
-160   160    
-160   -128   
-48    16     
-112   736    
64     240    
-272   -96    
-192   -160   
32     240    
-1152  240    
208    80     
-320   -240   
144    640    
160    336    
-352   -64    
48     -512   
176    -352   
16     -320   
64     -208   
32     -160   
176    144    
-32    288    
-96    0      
0      -128   
-592   -112   
112    96     
-112   64     
-80    560    
144    656    
0      304    
-160   144    
-176   -96    
272    48     
-208   64     
0      112    
-160   -32    
32     64     
-240   -48    
352    272    
-336   96     
16     96     
400    144    
-256   192    
-208   16     
-96    -48    
176    -64    
64     -176   
-16    -48    
96     96     
-144   80     
-96    32     
-16    -48    
-160   144    
304    144    
-368   -16    
160    256    
128    288    
-384   128    
64     64     
-16    96     
32     32     
128    64     
-32    0      
96     16     
-112   -64    
0      -32    
96     -16    
-224   64     
224    144    
-336   -48    
96     16     
-144   48     
160    128    
0      16     
80     128    
64     32     
-64    32     
48     -224   
32     80     
64     176    
-176   -32    
80     64     
-128   32     
48     32     
-64    -240   
-80    208    
368    352    
-416   -64    
160    160    
-224   0      
-128   -144   
16     -96    
0      -64    
80     48     
64     176    
-64    -128   
-48    96     
-16    -16    
32     48     
64     96     
128    272    
96     208    
-64    64     
96     112    
-32    112    
-48    64     
160    160    
-160   48     
32     80     
144    64     
-128   0      
48     112    
-64    -96    
144    -48    
80     176    
48     112    
-64    64     
32     80     
64     96     
16     80     
112    80     
-32    96     
112    96     
-80    -80    
160    -32    
-48    64     
48     80     
128    -48    
-80    48     
224    48     
-112   80     
96     128    
96     112    
112    176    
-80    144    
304    160    
-320   224    
208    176    
-208   80     
176    288    
-48    128    
64     192    
0      -304   
-112   -1072  
-32    48     
0      128    
384    352    
-96    256    
-64    112    
64     64     
16     64     
-80    48     
32     -16    
-64    48     
112    48     
80     -16    
160    112    
32     0      
96     -64    
-48    128    
16     0      
48     160    
112    96     
-128   -80    
80     80     
-48    112    
-32    16     
-32    48     
32     48     
0      48     
-32    -64    
-160   -384   
96     -192   
240    208    
0      64     
-96    16     
160    240    
144    -32    
-16    176    
192    64     
-16    48     
0      48     
144    32     
-48    -160   
-32    48     
272    96     
-352   32     
160    96     
-16    -672   
96     64     
288    -800   
-416   192    
128    32     
80     128    
-112   48     
-16    -272   
128    -80    
48     96     
-64    -96    
80     64     
0      16     
-80    16     
128    112    
-16    -96    
-160   96     
176    -144   
0      64     
64     128    
64     96     
0      176    
192    64     
16     144    
96     160    
-240   32     
208    128    
-176   32     
256    -240   
-32    128    
48     -32    
-144   160    
-112   -272   
272    224    
208    -1392  
-128   192    
192    128    
-16    80     
-112   -80    
256    -64    
-192   112    
16     64     
-128   144    
-16    -192   
128    80     
144    -16    
48     48     
-96    -368   
32     64     
144    -160   
112    144    
-32    176    
96     160    
224    -32    
-48    -96    
32     -272   
32     -320   
128    112    
-16    -160   
128    112    
-16    -336   
-48    -144   
-64    -624   
112    -32    
-48    -176   
224    -96    
80     -160   
-80    -240   
128    -368   
304    736    
80     -304   
112    -192   
400    160    
-96    -80    
416    16     
-304   -320   
192    352    
-192   -416   
112    144    
96     -16    
-48    80     
32     -192   
-48    -32    
160    -48    
-192   -384   
496    -176   
144    752    
-144   464    
48     -480   
240    -240   
-208   -16    
192    96     
128    -64    
0      96     
96     -192   
64     -432   
64     32     
64     -256   
48     48     
80     -320   
48     -416   
224    48     
-112   -576   
128    -16    
192    -64    
96     240    
-16    352    
112    -176   
128    -64    
-16    -80    
64     0      
-32    272    
144    -16    
-144   128    
-432   -96    
192    -80    
160    224    
-64    80     
-176   -128   
0      -512   
64     -176   
32     -2032  
-80    -176   
96     48     
0      -96    
0      -80    
-48    80     
32     16     
64     64     
-128   -32    
64     64     
-144   0      
112    144    
112    -128   
-80    -720   
-240   -928   
336    -368   
-304   -304   
-32    -288   
64     80     
-16    -64    
48     0      
16     -224   
48     -48    
-16    -64    
-16    -224   
-112   144    
80     -16    
176    -48    
64     -96    
32     -64    
-32    -144   
-80    64     
-160   -944   
-48    -496   
64     -416   
16     224    
176    0      
-32    16     
144    32     
-112   -288   
-512   -224   
128    -224   
-1168  -96    
80     176    
144    832    
-336   32     
-64    -560   
160    -784   
80     272    
-16    624    
144    64     
-112   -496   
-16    16     
-256   208    
-16    -480   
-48    -192   
64     0      
-432   96     
160    0      
-144   -288   
16     -272   
256    -112   
-32    32     
80     288    
64     -160   
0      112    
96     -720   
-16    -384   
128    80     
112    -224   
144    240    
32     208    
160    208    
112    -208   
-16    -272   
144    -464   
-80    -16    
0      -192   
32     128    
-32    -1216  
-208   -64    
-208   -64    
32     -48    
128    16     
-32    0      
0      -112   
48     80     
-208   -96    
-208   -304   
-208   -80    
176    -112   
-288   144    
192    -96    
-240   80     
208    -64    
-112   -32    
16     96     
128    80     
-320   -16    
208    -128   
128    144    
-288   -64    
48     128    
-144   -160   
-64    192    
32     -16    
-128   112    
-1520  -192   
0      96     
96     128    
-512   96     
-96    64     
-1248  -32    
-160   -80    
160    -144   
256    240    
-112   -32    
-80    48     
128    -64    
-80    -48    
-720   -112   
96     128    
-384   -128   
128    128    
-64    48     
-16    0      
-64    0      
-80    -64    
-48    32     
-1040  64     
112    16     
0      0      
-64    48     
128    -272   
-80    16     
-208   -160   
16     80     
-224   -144   
16     128    
-208   -256   
208    -192   
-144   112    
48     80     
-96    48     
48     96     
-32    32     
-336   -32    
96     -16    
-144   -128   
16     -16    
240    176    
-96    96     
0      -96    
-64    0      
48     80     
-192   0      
-16    112    
112    32     
-96    16     
-448   -16    
-16    -160   
-1264  -208   
96     128    
-96    -400   
96     144    
64     144    
-224   0      
16     64     
-32    -32    
0      32     
80     16     
-336   -224   
448    176    
-336   48     
-96    -16    
-112   32     
-64    32     
208    320    
-336   -16    
-80    64     
-32    -208   
-16    64     
144    32     
-256   -80    
176    -48    
32     112    
0      112    
-80    48     
-112   16     
208    48     
-80    128    
-144   16     
272    272    
-336   -80    
-32    96     
176    -32    
-32    16     
16     96     
144    272    
-224   32     
-80    112    
208    64     
-208   48     
160    0      
112    96     
0      -32    
-32    -192   
48     0      
-416   -128   
256    288    
-224   -80    
-224   192    
464    368    
-208   48     
-80    -32    
176    64     
-96    16     
48     48     
0      96     
-176   -112   
-128   -96    
-176   32     
176    80     
-432   48     
368    128    
-224   -96    
160    16     
-80    48     
0      128    
144    80     
-192   160    
208    -96    
96     192    
-192   80     
-48    16     
-64    96     
128    128    
-160   112    
-16    -128   
80     -16    
-96    -112   
304    -128   
-48    160    
112    160    
32     16     
48     128    
80     96     
-208   0      
64     16     
-144   -32    
64     128    
-256   -128   
256    16     
-320   -16    
112    32     
-64    96     
160    80     
0      0      
-128   80     
-16    16     
-16    96     
-96    64     
-48    0      
32     32     
80     80     
-64    128    
-96    -64    
64     128    
-16    -112   
112    160    
96     32     
-16    -64    
-16    -304   
-192   64     
496    288    
-80    128    
144    144    
-160   -48    
48     -64    
-48    -240   
224    160    
-144   -16    
48     64     
176    112    
240    736    
240    256    
-160   -160   
112    -80    
192    160    
64     128    
80     -16    
176    304    
-64    16     
0      64     
32     -64    
64     112    
-80    160    
64     112    
-128   48     
176    32     
32     160    
-336   -640   
-112   -240   
224    -48    
-224   96     
-96    112    
-16    -48    
-64    -160   
64     -64    
0      -160   
-16    96     
-16    -32    
-192   368    
-16    384    
192    112    
48     64     
-32    -96    
-64    -48    
192    160    
-80    96     
-240   80     
192    208    
-144   48     
80     80     
-16    64     
-96    320    
192    -144   
-16    -1488  
16     352    
-288   -320   
464    -512   
-112   208    
144    112    
-96    96     
80     112    
-128   -384   
160    208    
16     -304   
160    64     
128    464    
-160   64     
144    -48    
16     -368   
144    352    
112    -32    
-32    -48    
80     16     
-272   -464   
80     -368   
-64    144    
32     -144   
96     112    
-64    -48    
96     64     
-96    144    
160    -144   
-128   144    
128    0      
-160   64     
192    -1168  
128    -32    
-128   -320   
144    80     
112    160    
-64    0      
0      64     
208    112    
-32    16     
16     32     
-16    64     
208    48     
-80    48     
64     -80    
48     80     
64     -304   
32     96     
-144   416    
240    336    
-48    48     
-112   -224   
0      -144   
240    192    
-80    304    
224    240    
-208   32     
160    16     
16     -96    
48     -144   
48     64     
96     -176   
-64    -304   
128    -688   
64     304    
-128   -96    
64     64     
48     64     
128    112    
-80    80     
80     -80    
-48    -48    
288    -128   
-80    160    
64     -112   
-16    304    
208    -80    
32     144    
112    -752   
-80    -240   
128    32     
-80    -112   
-240   -320   
48     -192   
-272   -368   
0      -272   
96     272    
0      -208   
48     176    
64     192    
160    16     
-16    -96    
112    112    
144    -208   
112    112    
48     64     
-64    80     
112    64     
0      96     
-320   -608   
320    -256   
176    704    
-240   224    
-160   -1104  
208    -16    
-208   480    
96     -704   
160    512    
-32    -192   
256    352    
256    880    
-224   -192   
-16    -144   
-16    -112   
96     144    
80     -256   
80     80     
128    192    
32     0      
80     0      
64     672    
-32    -288   
208    -80    
240    416    
48     304    
160    432    
-16    -1872  
96     -32    
-32    -832   
32     -256   
-32    -192   
-80    -1360  
192    -432   
-96    -240   
352    208    
-64    272    
-16    96     
96     32     
112    -16    
-224   -544   
272    64     
272    16     
-272   0      
128    128    
0      -208   
64     -96    
-256   -64    
176    -48    
-160   -336   
16     -64    
128    -1328  
-144   64     
384    128    
-304   -144   
304    0      
16     96     
144    0      
272    272    
-336   -176   
-80    80     
-1808  16     
16     96     
64     32     
64     0      
64     -144   
160    -208   
-144   -48    
384    16     
-96    16     
272    128    
-288   128    
224    -128   
-160   -288   
48     -64    
80     -32    
-304   32     
80     32     
128    160    
-144   -144   
64     -96    
-64    -944   
400    -16    
-304   -1168  
448    112    
32     -32    
352    160    
16     128    
-96    -64    
16     -80    
112    48     
-112   0      
-80    0      
96     -128   
32     -176   
64     -32    
16     16     
80     0      
32     -224   
0      0      
176    -48    
80     112    
80     48     
80     160    
-128   16     
64     80     
-16    -112   
-64    -16    
-320   -64    
0      -48    
-320   16     
96     32     
-48    -144   
0      -384   
48     96     
-96    -688   
192    240    
-48    64     
-48    32     
112    0      
96     32     
-224   -48    
128    48     
96     0      
-144   32     
-304   0      
48     -64    
-640   16     
16     -288   
64     96     
112    -336   
224    -16    
-208   -16    
160    -208   
-80    -32    
112    -16    
-112   32     
32     32     
-160   32     
-144   -624   
-96    -160   
64     -256   
-80    144    
256    -192   
0      -16    
96     -400   
400    176    
-528   0      
272    128    
-32    -48    
-208   -64    
-64    32     
112    -16    
-240   -144   
16     -128   
80     128    
16     -80    
-112   48     
256    -176   
-128   96     
80     -32    
-96    0      
160    80     
32     16     
32     32     
112    -16    
64     400    
80     -16    
-176   -16    
80     48     
96     240    
-592   -48    
-32    64     
-272   -256   
-64    16     
16     64     
-208   16     
-16    112    
-544   64     
-416   -448   
192    -176   
-304   0      
0      48     
-48    0      
-96    -192   
160    16     
-336   -112   
112    64     
-480   -144   
160    208    
-176   112    
-16    16     
32     32     
-144   144    
64     16     
-400   -80    
-48    80     
304    48     
-352   0      
-48    -144   
-192   144    
-96    -80    
96     80     
-160   -144   
96     128    
-112   16     
-192   32     
-32    -48    
-144   -192   
48     -112   
16     96     
96     160    
-688   -32    
-64    -32    
112    -160   
80     96     
-64    -96    
272    160    
-48    -16    
16     64     
-192   -208   
48     32     
240    192    
176    -16    
-144   144    
-112   240    
160    256    
-336   16     
-80    -288   
-176   -368   
224    208    
-96    -16    
0      128    
-112   -16    
16     96     
208    208    
-176   144    
-48    48     
64     64     
-96    0      
144    736    
-80    352    
-240   -208   
64     0      
240    144    
192    224    
-128   -64    
384    576    
48     416    
-224   160    
32     272    
144    224    
-80    128    
-192   -208   
240    0      
-176   -80    
176    -496   
-80    -416   
16     -176   
-32    -16    
48     160    
16     -96    
-160   16     
144    288    
32     -16    
96     208    
-32    240    
96     240    
-176   16     
-48    96     
128    48     
-144   -32    
-176   -368   
400    512    
-816   48     
-192   -768   
288    368    
-32    656    
176    -480   
48     208    
0      288    
-32    -240   
-64    80     
-48    32     
32     224    
-240   -112   
256    -96    
-144   128    
-112   32     
80     -208   
112    352    
-48    -80    
16     -112   
304    208    
-320   112    
160    64     
-64    16     
-80    0      
112    112    
128    96     
-240   -32    
64     48     
0      48     
0      112    
-112   -128   
64     -64    
176    304    
-16    656    
-16    272    
-128   -96    
192    -80    
-144   -160   
64     -32    
-128   -16    
288    688    
128    320    
-288   48     
-64    -544   
-176   -608   
-128   -80    
-144   96     
-16    -336   
0      -432   
32     48     
160    64     
48     352    
128    224    
-16    560    
80     272    
32     192    
80     64     
-288   16     
176    96     
48     48     
-112   80     
96     0      
16     112    
80     64     
32     128    
16     48     
16     48     
-64    0      
0      80     
-64    128    
384    80     
-160   48     
112    112    
-64    288    
208    592    
32     144    
64     64     
-64    160    
48     -160   
-48    -96    
32     -256   
-16    -160   
368    336    
-128   -224   
48     -144   
112    48     
-96    -32    
144    112    
-112   128    
176    336    
-192   64     
0      128    
-112   -208   
-48    -336   
48     -240   
-32    -80    
240    368    
-80    256    
80     112    
-32    48     
-176   -208   
-112   -1072  
112    -464   
288    544    
-16    -272   
-32    -304   
-16    112    
240    64     
-96    0      
-16    96     
128    64     
80     240    
272    400    
-336   272    
80     -288   
-64    128    
-64    80     
48     16     
-32    -128   
80     -1328  
144    160    
-48    48     
-64    -80    
48     0      
80     768    
96     272    
-80    80     
32     112    
-16    128    
80     -64    
32     -64    
112    96     
544    -96    
16     96     
128    64     
96     112    
-32    -224   
96     64     
-96    0      
-32    32     
-16    0      
-16    -32    
352    384    
-48    -16    
176    -32    
96     384    
-96    192    
-96    -32    
16     80     
144    -16    
16     112    
-32    0      
224    -16    
128    320    
-192   96     
-16    -64    
32     -32    
64     -112   
48     176    
-160   -64    
64     80     
-48    48     
-64    -304   
304    -224   
-64    -16    
208    176    
-128   -192   
272    320    
-144   -1248  
-112   32     
-176   -192   
112    16     
48     96     
80     272    
-32    32     
0      128    
16     48     
-64    -64    
-32    176    
112    -80    
-128   64     
80     -256   
192    48     
128    -896   
128    160    
128    96     
240    160    
-304   -80    
160    320    
-48    304    
-192   192    
-144   32     
-160   -272   
-400   -432   
224    -288   
-80    32     
64     -64    
128    208    
-16    -672   
192    240    
-160   -464   
-64    48     
-48    -96    
272    64     
-224   80     
304    -336   
-48    160    
480    -720   
-208   48     
208    -80    
-32    -144   
96     -288   
96     48     
0      -224   
-16    96     
-112   0      
48     32     
176    144    
-208   96     
144    128    
-48    -320   
-128   -16    
192    16     
-64    144    
-96    -176   
0      128    
320    -192   
-288   80     
64     -96    
208    48     
-32    64     
128    -1248  
0      48     
160    -512   
112    -1792  
64     -128   
-96    -944   
0      -112   
128    -864   
160    192    
144    0      
112    144    
-160   240    
144    -144   
32     0      
48     0      
80     96     
80     64     
-208   -96    
208    -96    
144    144    
-192   -176   
-80    -448   
224    -1104  
48     -80    
64     336    
128    32     
-16    0      
-80    -256   
80     -400   
192    128    
176    -128   
-144   -48    
-64    -16    
224    64     
-144   0      
80     160    
240    -128   
-112   -128   
336    144    
-144   -416   
-16    -48    
160    -1184  
-176   48     
96     -224   
0      48     
224    -16    
-112   -48    
-80    -144   
176    -208   
-80    48     
160    144    
0      48     
64     -32    
160    -16    
-64    -144   
96     -64    
0      -304   
112    64     
96     112    
-64    80     
48     96     
-64    -96    
-160   0      
0      -96    
-192   0      
192    -80    
-32    -48    
-16    -320   
96     -176   
112    -784   
128    -48    
16     -288   
32     96     
16     -48    
-112   -16    
48     -208   
-96    -256   
64     -128   
-64    112    
0      48     
-176   -128   
-1552  -16    
496    384    
-272   496    
-96    -32    
112    -128   
96     -144   
208    -96    
144    48     
-96    80     
-32    96     
96     -48    
16     128    
32     -176   
-144   -240   
32     -112   
-144   352    
-176   -144   
-176   -112   
0      304    
400    48     
0      -512   
208    64     
160    -1248  
0      -96    
80     112    
192    48     
-160   -112   
96     96     
-192   192    
80     224    
-144   400    
-32    -496   
-32    -80    
368    688    
-448   -448   
144    -448   
-160   96     
176    -288   
128    464    
-144   -48    
208    80     
-176   -16    
112    128    
48     64     
128    272    
-128   208    
16     -416   
-176   -64    
112    -128   
64     -16    
96     160    
16     -32    
-336   -384   
416    -448   
-112   368    
224    112    
-48    -592   
224    48     
64     224    
64     48     
160    160    
-256   -80    
112    16     
0      96     
560    -16    
0      176    
-48    80     
128    -16    
-880   400    
-16    -176   
-1072  144    
-64    320    
-96    16     
-176   -288   
96     -656   
-240   -624   
80     96     
-80    128    
-336   -144   
80     -48    
-224   -208   
48     -80    
-48    80     
-288   160    
-256   -128   
-64    384    
-416   192    
-544   -800   
0      160    
-208   464    
16     -128   
0      160    
-176   96     
-64    -544   
-32    -320   
224    384    
-416   48     
32     -592   
48     208    
256    320    
-576   192    
112    -240   
-112   -16    
-32    160    
144    -16    
16     96     
-16    -320   
-384   192    
432    -96    
-352   80     
64     -32    
16     112    
32     0      
-16    432    
-32    -80    
-192   -432   
176    0      
-32    432    
-80    -64    
-544   -112   
-176   16     
-64    -256   
112    -48    
-64    -112   
96     720    
-128   -688   
0      -320   
272    832    
-400   80     
208    -64    
-32    -48    
-128   32     
176    -112   
-240   768    
-416   -352   
-400   -1280  
128    -656   
224    928    
256    1184   
-128   464    
-80    -144   
-400   -208   
336    16     
-96    48     
-16    64     
32     32     
64     128    
-192   0      
0      32     
-176   48     
64     64     
-912   0      
32     -32    
-48    96     
288    384    
-496   32     
-16    -96    
128    -80    
-32    320    
-64    48     
-176   -80    
64     48     
-208   -432   
224    32     
-160   192    
-80    48     
-608   256    
-208   -256   
64     -80    
80     144    
-128   16     
-32    -96    
192    48     
-192   352    
-224   64     
96     288    
0      32     
48     80     
-80    -304   
-64    -96    
32     -16    
-96    -80    
80     384    
144    336    
368    464    
-240   144    
32     0      
-128   -96    
48     -48    
-112   32     
208    96     
96     192    
32     96     
256    192    
-464   -16    
288    -176   
-384   -48    
0      64     
-80    80     
16     48     
96     96     
-16    128    
176    144    
-48    64     
112    48     
48     160    
32     -16    
-32    -96    
32     96     
-80    -64    
-48    80     
0      16     
112    64     
32     80     
-64    16     
-80    64     
144    240    
-32    -64    
160    144    
-16    32     
0      64     
112    144    
-16    192    
32     48     
112    160    
352    336    
-272   -80    
48     144    
80     96     
-16    48     
128    144    
16     0      
-64    64     
-80    64     
-192   0      
0      0      
-112   16     
-32    -32    
96     224    
-192   -16    
64     160    
-16    176    
-208   -16    
80     240    
-112   160    
-256   -208   
352    -640   
-160   -288   
96     -64    
0      224    
176    272    
112    288    
-80    -32    
-32    -96    
-144   48     
160    320    
-32    0      
-272   -32    
-48    48     
144    144    
112    -48    
112    80     
384    32     
288    -16    
208    96     
128    16     
48     128    
-272   -64    
208    32     
-16    -144   
-16    -752   
64     80     
192    352    
96     176    
-448   -208   
-128   -144   
240    240    
-16    224    
-112   96     
32     64     
48     -176   
48     -16    
48     0      
64     48     
32     128    
32     -944   
16     32     
-32    80     
144    112    
256    48     
-192   -112   
368    0      
176    320    
-16    80     
0      -96    
192    -128   
32     208    
96     48     
-64    32     
128    32     
112    -608   
-32    112    
32     32     
-16    -80    
432    96     
-16    80     
64     -16    
96     144    
32     48     
-144   -128   
32     48     
80     48     
-64    160    
240    48     
-32    48     
240    16     
-112   32     
240    -496   
128    48     
-80    32     
192    176    
-176   160    
64     128    
80     48     
256    432    
48     -112   
-272   80     
208    16     
-16    -160   
-32    48     
96     -64    
16     -16    
16     -1344  
16     128    
48     176    
0      240    
0      -32    
80     32     
32     32     
176    48     
48     -112   
112    32     
-112   -16    
80     -464   
96     48     
208    -64    
-144   96     
144    -912   
-112   48     
208    -896   
48     -80    
-96    -32    
320    208    
-208   80     
-16    -48    
48     -144   
160    128    
48     32     
96     176    
128    128    
-16    208    
192    240    
-16    -160   
80     48     
112    -48    
-112   -128   
-112   -208   
160    -624   
80     -464   
144    -160   
-80    -160   
192    192    
80     352    
0      320    
48     240    
0      -656   
16     160    
80     -64    
16     16     
-32    -544   
96     -16    
16     -128   
112    -224   
-80    -272   
32     -336   
-64    128    
176    -128   
-80    96     
112    -368   
-80    -48    
224    -80    
80     448    
96     16     
-64    -128   
80     -176   
80     608    
-80    -288   
272    0      
-64    -16    
144    320    
112    -1376  
304    224    
-112   -336   
-144   320    
192    -336   
64     112    
128    256    
16     -80    
-16    96     
112    -208   
112    -448   
-240   -256   
448    -576   
-32    192    
16     -464   
-48    -624   
192    -112   
64     224    
32     32     
144    -832   
320    352    
48     464    
-208   144    
-352   -448   
64     -496   
160    208    
112    304    
-32    -368   
-32    -144   
-304   -368   
368    -208   
224    224    
-16    -192   
16     -496   
-48    -320   
-32    -16    
-144   -800   
64     -48    
-64    352    
160    256    
128    80     
112    -112   
-112   -224   
304    496    
-240   304    
-16    -288   
256    0      
128    176    
-176   -64    
160    -384   
0      32     
-64    -160   
-96    -688   
-128   192    
-144   16     
192    96     
144    368    
128    -16    
48     -16    
32     16     
-64    -64    
-240   -96    
160    160    
224    672    
-112   -512   
96     352    
176    -352   
-112   -464   
-64    -528   
288    48     
64     320    
-16    -336   
0      -160   
176    -16    
-304   -128   
-16    16     
192    -384   
176    160    
-688   160    
336    -912   
-96    -192   
-32    304    
-144   256    
-96    -240   
144    -528   
-128   224    
-128   208    
-16    -352   
-112   160    
224    -352   
-256   288    
48     -656   
-368   -208   
224    -656   
-144   320    
-752   -176   
208    -160   
128    96     
192    640    
64     -16    
-224   -2352  
-96    -496   
80     0      
112    192    
128    -16    
-208   -160   
-288   -128   
0      -16    
-736   -352   
144    48     
-224   -64    
288    96     
-144   64     
576    -32    
-368   -272   
112    -464   
-48    -96    
272    -320   
160    80     
-560   -208   
624    192    
-336   64     
224    -240   
-192   48     
112    -16    
112    64     
96     -176   
-80    -32    
272    336    
-160   -672   
64     -384   
48     448    
-48    -192   
0      -96    
-160   80     
-16    -384   
-64    -176   
144    -256   
-64    112    
160    -48    
112    32     
64     -224   
64     80     
272    112    
-192   144    
16     16     
112    -240   
-464   -176   
160    -160   
-304   112    
128    64     
-80    112    
16     -80    
-160   160    
144    16     
-224   -80    
-64    -112   
-48    32     
-368   -16    
-80    128    
-272   -112   
256    -64    
-128   112    
-352   -80    
-64    96     
-448   80     
-256   -32    
64     -80    
0      -16    
-512   -64    
0      16     
0      -112   
48     0      
-240   -192   
-176   32     
128    48     
-96    128    
-64    112    
-192   0      
-80    16     
-640   48     
112    208    
-240   -48    
144    80     
112    0      
80     112    
-192   -224   
80     80     
-112   -224   
-224   16     
64     0      
-96    160    
16     112    
-240   -96    
-144   -80    
-16    -96    
0      -80    
-896   -64    
-48    -128   
208    -400   
112    144    
96     -144   
48     96     
48     96     
0      48     
48     -16    
64     0      
-96    -64    
16     48     
80     -32    
-96    0      
-96    160    
-176   -160   
128    208    
-176   16     
96     48     
32     80     
-32    32     
-80    16     
16     -16    
-80    -16    
-208   -208   
48     112    
-224   -64    
-128   64     
-176   16     
-304   -256   
-464   -192   
272    480    
-1200  -176   
288    64     
-32    -128   
96     -224   
16     -48    
128    208    
-48    80     
-80    -32    
128    -16    
-64    -112   
32     0      
-224   -96    
432    224    
0      176    
-16    272    
-560   32     
-16    -176   
32     -416   
-48    0      
144    48     
224    368    
-96    64     
-192   48     
224    208    
16     304    
192    208    
112    64     
528    224    
160    160    
128    544    
400    352    
-176   0      
400    256    
64     224    
32     -16    
240    64     
-160   32     
-128   -32    
-80    80     
208    -16    
48     176    
64     176    
-400   96     
112    -48    
-32    0      
128    -176   
128    112    
144    400    
96     208    
-112   48     
256    16     
-192   -32    
-256   0      
192    144    
96     32     
-16    48     
-304   -192   
368    64     
-304   -32    
0      192    
128    240    
-192   32     
64     80     
64     80     
64     64     
-96    16     
112    48     
-32    64     
112    80     
-16    0      
64     -48    
128    32     
160    176    
-80    32     
80     -16    
64     0      
-128   -16    
64     128    
144    64     
80     192    
-48    96     
128    96     
48     0      
32     80     
-48    0      
-48    64     
-16    -32    
32     -16    
0      176    
240    64     
-192   -96    
112    0      
112    32     
80     32     
-64    112    
-96    32     
-48    -16    
80     -16    
112    -48    
-64    32     
-16    128    
-64    -48    
48     64     
368    512    
-560   352    
160    224    
80     16     
0      0      
0      48     
-16    64     
48     32     
80     128    
48     32     
96     96     
-16    48     
576    672    
-352   528    
32     432    
224    656    
-96    480    
-80    -96    
64     -368   
48     304    
64     144    
64     256    
64     64     
16     240    
-32    -48    
32     -144   
0      144    
0      -32    
-144   -272   
112    464    
80     -384   
144    -400   
-32    48     
32     48     
144    144    
160    496    
-256   -240   
112    -240   
144    448    
-112   -16    
160    -112   
-80    224    
96     224    
-224   -192   
224    112    
496    640    
96     496    
-96    112    
-32    -720   
-32    -432   
80     208    
144    96     
-64    48     
32     64     
32     80     
80     48     
-208   -240   
192    80     
48     160    
96     16     
-96    48     
144    -368   
-96    96     
96     -816   
64     48     
48     32     
-80    48     
-160   -16    
0      -80    
0      -112   
-16    64     
-256   -240   
400    -256   
-80    80     
256    -144   
-336   -320   
576    336    
32     1104   
-320   -768   
96     48     
96     96     
-80    64     
48     -112   
112    -192   
-32    -192   
352    32     
-96    208    
256    240    
-48    192    
304    16     
80     192    
128    16     
-240   192    
384    -544   
-320   64     
-48    -1488  
144    -80    
64     336    
224    656    
16     352    
112    464    
16     48     
48     32     
352    -80    
-64    112    
272    368    
112    416    
224    288    
-48    -32    
160    -304   
-32    224    
-192   -304   
240    -64    
48     416    
32     160    
112    176    
-192   -112   
256    -480   
160    384    
144    -32    
48     160    
-64    -288   
-16    -336   
64     -144   
176    96     
96     32     
352    704    
-416   -640   
336    -208   
-64    0      
208    160    
-304   32     
-48    -576   
144    528    
192    -128   
32     480    
-336   -528   
96     -224   
0      288    
0      432    
-80    -2544  
-192   -64    
-32    -144   
144    272    
160    576    
-352   -432   
224    -272   
192    336    
48     240    
-16    -112   
0      80     
192    -128   
-288   -128   
-16    -192   
112    0      
192    -112   
-160   16     
160    -96    
-144   -1008  
80     -336   
176    -480   
-112   -656   
256    -336   
48     -304   
464    208    
-400   -336   
112    -96    
-32    32     
144    80     
-48    160    
80     240    
464    -352   
-336   368    
64     -224   
-48    128    
-736   0      
144    208    
-48    272    
-48    -32    
272    -192   
48     -240   
176    -112   
-64    -224   
208    64     
-48    80     
0      -368   
-80    -416   
64     -16    
80     -80    
96     32     
-48    80     
176    16     
0      288    
-320   48     
208    -464   
-160   -944   
304    64     
-96    -288   
64     144    
224    208    
-80    -112   
48     -16    
16     192    
128    32     
0      -144   
-144   -64    
-32    -32    
-976   -96    
48     -224   
48     160    
48     -80    
-80    -80    
144    -480   
176    -208   
-80    -2880  
224    160    
-112   -160   
128    112    
240    160    
-256   -80    
-208   -96    
272    -80    
-288   -64    
16     96     
-688   112    
-208   128    
-16    16     
160    -48    
32     16     
-80    -928   
16     64     
96     -32    
32     160    
48     112    
48     -160   
-48    16     
144    -240   
64     32     
32     -128   
80     96     
64     -240   
-304   -96    
64     -448   
128    112    
272    -160   
-288   64     
240    -80    
48     48     
-16    -16    
-16    -80    
16     -16    
-48    -112   
-48    -96    
160    -32    
-400   -80    
192    -48    
-736   32     
48     -48    
112    96     
48     336    
128    432    
0      -448   
-96    -560   
-32    -272   
144    432    
-16    384    
208    288    
-432   -64    
64     -48    
16     -32    
32     32     
32     112    
112    -144   
80     112    
208    -240   
-32    0      
192    -448   
-32    -64    
48     48     
-48    32     
0      0      
-32    -112   
-112   0      
128    -32    
-224   -48    
320    16     
-64    144    
64     -48    
16     160    
320    192    
-272   304    
-96    176    
96     -16    
-432   -512   
336    64     
-272   -112   
-48    -144   
48     64     
48     0      
0      48     
-48    -16    
-544   64     
-544   -320   
-48    -272   
-176   -528   
0      208    
192    80     
-816   -144   
80     -16    
-416   -48    
-144   32     
48     64     
-96    -112   
0      48     
-352   16     
-160   -176   
32     128    
-144   -48    
16     80     
-352   -160   
-32    -256   
128    80     
-720   -256   
240    -224   
-400   192    
416    32     
-944   64     
112    48     
-96    -48    
144    32     
-144   64     
128    -64    
-320   48     
304    48     
128    -240   
-256   -16    
-16    -48    
-128   64     
-128   -64    
-64    16     
48     32     
-64    48     
-400   -112   
-464   -128   
-64    32     
64     0      
32     64     
-160   -144   
48     144    
-144   -96    
64     64     
208    80     
-64    96     
-80    128    
-112   16     
-128   32     
64     -16    
-176   -64    
-112   64     
-16    48     
-144   -64    
96     128    
-128   -128   
0      48     
112    96     
64     -64    
-112   -192   
64     -48    
48     -176   
-192   -320   
176    -128   
176    128    
96     -16    
-240   160    
112    80     
-832   48     
32     48     
32     -96    
16     -64    
-16    16     
112    320    
-240   -112   
96     144    
-160   -112   
-80    -208   
96     -64    
-48    128    
80     256    
-528   -240   
96     -416   
-752   64     
-64    368    
0      80     
-96    -368   
32     -368   
16     464    
-160   -32    
176    -32    
-192   112    
80     96     
-192   64     
192    64     
-64    16     
-160   -32    
80     80     
-96    64     
112    112    
0      80     
96     32     
-144   336    
240    128    
272    528    
-368   96     
48     -416   
-224   16     
128    64     
-80    -16    
80     240    
-128   256    
16     16     
-256   -96    
160    288    
-160   96     
64     240    
64     0      
-32    48     
80     -80    
-64    48     
112    256    
-176   0      
0      32     
-144   -112   
16     112    
-144   16     
-16    192    
-176   64     
-80    16     
256    224    
-256   48     
208    -48    
-240   128    
32     128    
160    -272   
-320   32     
-176   -368   
-32    -288   
-64    192    
-48    48     
48     144    
80     224    
-80    -32    
-16    96     
96     112    
-16    32     
112    32     
-80    16     
-16    -16    
112    144    
144    112    
-48    -32    
176    64     
0      464    
240    256    
48     64     
-48    208    
64     208    
64     32     
80     96     
-240   -32    
80     80     
-192   848    
624    560    
-256   80     
16     0      
-272   -16    
176    16     
-304   -336   
272    -128   
16     -304   
480    256    
512    480    
-176   352    
272    -112   
-144   -176   
256    64     
144    128    
80     96     
112    480    
96     -48    
-336   -560   
560    672    
32     1040   
-240   -32    
224    -96    
96     192    
144    32     
-144   16     
-96    32     
272    144    
-256   -144   
176    -544   
432    768    
240    944    
-128   32     
144    -176   
192    336    
-352   -64    
112    752    
0      -144   
32     -1856  
-400   -544   
32     -192   
128    960    
224    704    
-16    304    
-112   -64    
-16    176    
48     400    
48     160    
-272   -304   
304    352    
-336   96     
64     128    
0      96     
128    -16    
64     272    
256    240    
-16    -16    
80     224    
80     0      
128    -176   
48     -112   
64     48     
16     64     
-96    48     
64     -16    
-160   -16    
-64    112    
-16    32     
160    32     
-16    64     
368    400    
-208   384    
32     96     
48     96     
48     96     
-288   16     
128    16     
160    64     
-144   -48    
304    176    
-368   80     
80     48     
48     64     
80     -784   
-80    112    
32     -928   
-32    -16    
48     144    
384    304    
-560   112    
48     0      
-64    -144   
32     96     
-96    48     
32     -64    
160    128    
176    -96    
80     144    
80     -112   
112    64     
176    -144   
-96    112    
48     96     
-16    48     
32     -96    
240    96     
32     16     
16     64     
32     96     
0      -144   
-48    80     
64     -80    
-64    80     
80     -32    
112    112    
112    -160   
-16    -16    
96     -400   
32     -16    
192    80     
80     192    
0      96     
128    80     
-80    48     
-64    -160   
0      128    
112    -144   
-96    0      
176    -16    
-16    48     
80     -352   
0      176    
-16    -560   
160    32     
-48    128    
32     32     
80     112    
-16    192    
-176   -80    
272    -144   
-16    128    
64     160    
-32    32     
112    -160   
240    208    
-160   96     
-112   128    
64     -16    
144    0      
-160   48     
112    96     
-16    112    
32     80     
48     64     
64     32     
48     96     
64     -256   
80     96     
0      -48    
192    272    
-144   16     
80     144    
160    -16    
-32    112    
-32    -720   
128    48     
64     64     
-224   -240   
352    -2000  
-48    -64    
176    -2416  
0      -32    
176    64     
-32    112    
144    128    
-16    -160   
64     96     
-112   -112   
288    -1744  
-80    16     
-48    -16    
272    224    
-752   64     
112    -128   
64     -48    
-96    -384   
48     -192   
-64    -96    
0      -224   
144    -32    
128    -176   
-112   -1008  
112    64     
80     -240   
112    96     
-16    16     
272    416    
-528   -16    
96     -288   
-16    -16    
0      -192   
144    32     
-96    -656   
176    -48    
-64    -2768  
96     0      
80     -64    
96     16     
-80    -80    
-48    48     
-16    32     
112    -208   
-256   -32    
192    -80    
-832   32     
64     -32    
-192   -80    
288    304    
48     -256   
80     -720   
144    128    
48     -128   
48     0      
160    -112   
-64    16     
-64    -48    
208    16     
304    448    
-160   352    
-240   32     
256    -64    
192    -80    
-48    -96    
48     32     
112    32     
-16    -32    
-32    -624   
48     96     
16     -96    
96     112    
-32    -16    
160    0      
-96    -16    
32     32     
176    16     
-240   16     
-336   -32    
80     -128   
-208   128    
176    -48    
-224   -64    
64     -576   
256    256    
-80    -16    
352    192    
-144   -32    
48     144    
240    0      
-96    -64    
-128   48     
240    384    
64     176    
-208   -416   
-320   -144   
64     -640   
64     -80    
80     -176   
-16    128    
-48    -144   
48     16     
-176   -112   
160    -80    
-96    32     
-48    -96    
-96    48     
304    112    
-304   16     
144    -144   
16     -80    
96     -80    
-64    80     
144    -32    
208    32     
48     -1312  
-144   32     
176    80     
96     272    
-208   192    
112    272    
112    256    
-80    -16    
-80    -272   
-128   -336   
-96    272    
96     48     
-96    16     
112    -320   
-160   288    
48     -400   
96     16     
-80    -16    
-48    80     
-240   -224   
-176   -128   
-16    -256   
80     -128   
-48    320    
64     -320   
-704   224    
16     -192   
32     0      
-896   272    
-256   32     
160    48     
-688   80     
64     64     
-400   -16    
16     336    
128    96     
32     144    
48     -80    
-80    80     
176    -64    
-144   16     
-1200  -208   
96     96     
-96    -64    
-160   48     
-16    16     
-304   32     
-48    16     
-800   -112   
160    -256   
-864   128    
-48    48     
112    0      
-64    48     
144    -176   
80     96     
-48    -48    
16     80     
160    48     
-224   160    
-64    -128   
48     -64    
-192   32     
96     80     
64     176    
-432   48     
0      -32    
-160   -112   
-16    -64    
0      -96    
96     48     
144    112    
-176   64     
-80    32     
-32    80     
-64    240    
32     144    
-176   -48    
80     128    
-128   -64    
-352   80     
-64    0      
64     1072   
-80    384    
48     96     
-112   288    
144    -16    
-112   48     
48     16     
-80    -16    
16     96     
-48    -32    
48     128    
0      -16    
-64    112    
-96    -64    
-96    48     
96     -48    
-80    112    
-80    -64    
-48    -176   
-256   -640   
-240   -624   
160    0      
48     384    
-32    176    
-96    16     
128    -64    
96     16     
64     336    
-80    304    
32     1040   
-64    -464   
-656   -1024  
272    48     
-224   464    
0      -144   
-64    -32    
128    128    
-16    -144   
-368   -304   
400    -128   
192    304    
176    176    
-208   32     
144    -16    
-144   336    
-224   -336   
80     -288   
-576   176    
112    160    
-80    -192   
128    -224   
0      -128   
-96    -144   
-64    -176   
-16    -192   
48     64     
112    272    
-176   80     
-16    32     
0      80     
-64    -480   
32     -240   
128    32     
96     64     
192    320    
-80    240    
64     368    
-96    96     
320    352    
-384   48     
48     -16    
-288   352    
400    16     
-288   48     
112    48     
-224   -16    
176    16     
-752   -224   
320    -288   
-432   -192   
704    160    
-288   176    
240    48     
-32    112    
320    64     
-528   208    
128    -112   
-176   208    
-16    0      
-96    160    
144    -96    
112    48     
-144   0      
-80    16     
48     -16    
32     96     
144    80     
-160   64     
128    144    
32     0      
-144   -32    
80     176    
-96    32     
-128   32     
128    80     
-16    48     
32     64     
-48    80     
160    80     
128    224    
-288   -32    
128    112    
32     48     
48     32     
-96    16     
112    -48    
-96    48     
-96    32     
-256   -112   
240    128    
-160   -64    
128    80     
256    144    
-16    144    
-96    64     
16     -32    
96     32     
96     160    
32     0      
0      64     
176    128    
-32    16     
16     16     
-48    64     
144    64     
16     48     
32     -16    
128    96     
80     32     
-64    48     
112    112    
-48    128    
-16    32     
0      144    
80     32     
32     160    
64     160    
-96    -32    
-64    80     
144    48     
-240   -16    
80     32     
-144   -32    
64     96     
48     256    
208    80     
-240   -32    
-16    48     
48     112    
-144   -16    
32     80     
128    0      
0      112    
-320   -144   
320    -64    
0      -16    
144    -2672  
-192   0      
288    112    
32     144    
48     96     
144    48     
-48    16     
112    80     
-160   96     
208    -112   
48     96     
192    16     
-320   48     
208    112    
-16    112    
64     -256   
48     -128   
80     32     
192    192    
-192   208    
-112   32     
144    80     
128    80     
32     112    
80     16     
48     -80    
128    32     
-144   16     
112    -112   
64     144    
-16    -352   
-64    -160   
64     -144   
-128   208    
80     144    
0      0      
160    -32    
-48    16     
48     -320   
160    64     
-176   -128   
112    128    
176    80     
-16    -16    
64     112    
-16    -96    
-32    112    
0      -912   
128    192    
160    192    
-48    0      
240    128    
-48    144    
-160   -80    
144    96     
16     0      
144    16     
-32    112    
80     -96    
-16    96     
80     16     
240    240    
-144   -128   
192    112    
-112   -1152  
128    -16    
112    128    
64     320    
64     64     
-32    144    
144    16     
-80    96     
0      96     
-112   -224   
144    128    
0      -96    
48     112    
32     64     
160    240    
-16    -1104  
-32    16     
160    48     
-176   160    
80     32     
-32    32     
48     -32    
-80    -80    
288    96     
-144   64     
32     -96    
144    0      
192    128    
-368   -688   
0      -48    
112    -224   
96     32     
0      304    
48     384    
-304   -80    
352    0      
-96    -224   
80     -592   
-80    64     
80     64     
-16    112    
32     -192   
0      112    
-144   -96    
144    304    
112    336    
128    96     
-128   -480   
64     64     
144    144    
-368   208    
304    176    
-304   16     
16     48     
-176   -208   
80     -16    
112    -128   
496    528    
-272   464    
-144   240    
144    -64    
288    144    
-80    -160   
432    -1120  
-80    -16    
112    -816   
64     656    
128    304    
-144   -176   
96     -80    
16     160    
-48    -16    
-80    -160   
16     16     
272    176    
-176   -144   
-32    -640   
-32    112    
224    32     
-16    208    
-32    -208   
368    160    
-304   -272   
32     -352   
112    -224   
144    -112   
64     32     
32     -544   
80     -80    
0      64     
16     0      
64     -160   
368    368    
-320   -224   
160    -592   
-176   208    
-96    384    
-704   -128   
48     -496   
48     144    
112    -256   
32     48     
16     -912   
80     -32    
96     -80    
64     352    
64     48     
-336   -368   
160    -304   
16     -32    
-160   -64    
32     -48    
-176   -176   
160    -256   
288    192    
-48    496    
80     0      
48     -384   
128    80     
224    -672   
-144   112    
192    -112   
-64    32     
112    -80    
192    -96    
-16    32     
32     -32    
-320   16     
32     -208   
-320   -48    
48     -64    
224    160    
-192   -432   
-32    -192   
224    -576   
112    240    
48     144    
32     96     
-16    32     
-32    -144   
-32    -96    
256    64     
-512   112    
128    -64    
-112   -16    
64     -112   
192    64     
-80    -304   
64     -48    
0      -832   
-16    -32    
112    -176   
-16    80     
32     32     
80     96     
64     -16    
176    560    
-48    480    
-16    96     
-48    176    
128    112    
-368   -144   
80     -416   
16     -112   
784    480    
-240   1120   
240    -304   
240    496    
96     304    
112    -96    
-144   80     
160    0      
-240   48     
160    -16    
-272   -48    
-128   16     
320    432    
-480   -256   
96     -224   
0      -128   
64     160    
-256   16     
-32    96     
-496   -720   
496    -432   
-128   960    
-64    -272   
-272   -400   
224    128    
-96    144    
-48    -128   
-32    96     
96     112    
-144   256    
-240   -624   
-80    -192   
-96    112    
208    528    
-160   16     
-64    -192   
-16    -304   
64     48     
-32    192    
48     112    
0      48     
16     16     
128    560    
-208   -16    
-96    32     
-1200  -96    
-528   16     
-112   112    
-96    48     
32     160    
-752   -80    
64     256    
144    32     
32     16     
144    96     
224    336    
-416   48     
0      96     
-48    -144   
48     16     
-64    272    
-176   64     
-400   80     
304    176    
-224   144    
-592   240    
-416   -48    
-384   144    
-144   0      
112    32     
-96    -16    
-304   -112   
16     64     
0      0      
-32    32     
32     -80    
144    144    
-240   32     
-112   0      
192    272    
-400   64     
-80    32     
-144   128    
0      0      
-1488  -112   
-64    80     
-128   -112   
464    512    
-736   -160   
256    224    
-144   112    
-64    -96    
-160   -32    
-144   96     
-48    112    
-96    160    
32     112    
-240   16     
-144   -48    
-560   -48    
16     16     
0      48     
-16    80     
-64    -112   
-16    -16    
-240   -160   
48     -144   
16     -128   
80     32     
0      -96    
-32    32     
-336   0      
-144   -64    
0      0      
-96    128    
80     80     
-1536  -32    
224    160    
128    -16    
-192   -64    
128    112    
176    80     
-48    96     
-16    48     
-64    0      
-16    16     
-208   48     
32     48     
-16    -80    
-48    64     
112    128    
-512   96     
-128   96     
-32    96     
64     64     
-32    -48    
0      0      
192    128    
-96    32     
384    320    
-512   16     
288    128    
-320   32     
96     64     
-288   -96    
-48    48     
96     -32    
32     144    
96     80     
-208   -64    
112    288    
-64    48     
-64    -16    
-160   -80    
128    32     
-160   32     
32     16     
-16    0      
32     64     
-32    -112   
-368   288    
-240   0      
-256   48     
96     80     
80     32     
-160   64     
144    64     
80     144    
-112   -288   
96     0      
304    288    
-384   160    
-112   -96    
96     80     
16     96     
-112   -48    
-16    -48    
64     96     
16     16     
-144   48     
160    144    
32     48     
64     96     
48     48     
-48    80     
-16    -64    
80     176    
-80    0      
208    336    
-176   0      
144    160    
-176   -32    
0      -32    
0      64     
96     64     
96     160    
32     32     
32     96     
-32    -64    
-112   176    
128    -16    
-112   64     
48     32     
-96    96     
-48    -144   
-48    144    
176    48     
-64    -48    
192    112    
64     96     
96     80     
-32    80     
-16    0      
0      80     
-128   256    
80     64     
64     64     
80     0      
-160   112    
-112   -96    
224    16     
-16    112    
48     80     
-144   -96    
48     -112   
112    -144   
-112   -176   
464    160    
-112   208    
-48    -144   
96     -368   
240    0      
-112   -48    
-144   192    
96     -128   
48     -32    
224    96     
-48    288    
-96    -272   
-32    224    
96     176    
-48    176    
-32    128    
-64    -160   
400    192    
-272   112    
48     96     
16     -96    
160    128    
192    176    
112    0      
-16    64     
16     96     
32     112    
144    144    
32     352    
-64    144    
192    224    
-384   192    
32     -320   
-96    48     
288    160    
-64    224    
224    816    
160    272    
-320   -560   
448    48     
-192   80     
96     208    
-192   32     
112    160    
-32    144    
16     240    
272    304    
96     576    
32     224    
112    352    
-112   -384   
-96    -720   
112    -272   
224    -208   
-128   112    
192    160    
16     288    
-144   240    
320    352    
-112   96     
32     -160   
-48    -144   
320    336    
-192   80     
64     -16    
160    -144   
112    -80    
272    640    
-208   160    
32     -704   
272    -1984  
-272   -32    
144    128    
16     144    
-80    -320   
96     288    
-144   496    
112    -384   
-80    -256   
160    560    
-96    656    
288    448    
-288   -288   
-48    -144   
48     -112   
128    -272   
-112   192    
144    144    
-16    112    
-128   -256   
208    112    
32     32     
-48    80     
0      32     
-32    48     
128    48     
-48    -384   
16     -160   
-96    -272   
-240   -304   
272    -224   
32     624    
336    -864   
-336   -160   
64     -384   
-96    -32    
-16    -256   
0      -16    
80     272    
-48    -208   
-32    256    
208    -32    
-16    -64    
48     0      
48     64     
96     0      
80     0      
48     -896   
64     176    
32     368    
80     160    
128    304    
48     256    
48     64     
0      -336   
112    128    
112    0      
48     16     
-32    16     
112    64     
48     0      
0      64     
96     -64    
48     96     
48     64     
208    192    
-176   -448   
64     -32    
-48    -352   
336    -512   
176    352    
224    -208   
112    192    
112    96     
112    240    
48     128    
32     384    
-16    32     
80     -64    
-64    48     
160    -192   
-448   -320   
208    -1568  
224    -304   
-272   496    
192    -656   
0      -32    
-16    -64    
208    -320   
64     288    
32     -48    
80     -112   
-16    -176   
80     -640   
-208   -368   
336    -848   
-160   -208   
-160   16     
-48    -256   
-96    -288   
80     -720   
16     64     
48     -1248  
-128   -208   
128    224    
96     112    
48     48     
-112   -192   
-64    -176   
224    288    
80     -96    
-288   -816   
0      -256   
-64    -64    
336    160    
-32    -336   
80     -160   
-160   528    
272    304    
192    -496   
-320   -144   
112    16     
-16    -32    
144    -96    
32     128    
64     48     
208    -16    
-144   -64    
224    352    
-368   272    
48     0      
192    48     
-48    -128   
144    -112   
32     32     
112    -32    
176    -272   
-128   80     
288    0      
-64    -32    
144    -96    
176    112    
-176   112    
16     64     
224    400    
-160   176    
64     32     
-32    -192   
144    48     
-144   -144   
368    -80    
-80    -160   
128    48     
-32    -48    
32     112    
-16    -32    
-80    16     
96     -32    
-80    -176   
-336   512    
304    -48    
-352   16     
160    -144   
-448   128    
32     128    
-160   272    
48     -512   
-176   -64    
48     -80    
16     48     
-112   -192   
112    80     
-240   0      
-16    -16    
-320   96     
144    16     
144    176    
-16    176    
208    -112   
-80    -176   
256    32     
-80    -416   
144    16     
48     -752   
160    96     
-80    160    
-144   -48    
80     192    
-112   208    
-128   192    
-96    -224   
0      80     
-48    -112   
-48    -32    
-96    -576   
-64    -80    
160    -160   
-144   272    
48     -912   
112    -48    
-592   96     
0      32     
-80    -64    
80     32     
-144   176    
96     192    
-352   176    
-240   -192   
96     -336   
-16    -144   
112    16     
112    -96    
-32    64     
-16    -16    
144    0      
-64    96     
96     -16    
48     32     
128    80     
-208   -32    
32     48     
0      32     
-96    -128   
-208   -64    
48     -64    
144    240    
-1600  -160   
128    144    
-112   -96    
-400   128    
304    80     
-384   0      
16     48     
0      -16    
96     0      
-16    80     
-32    112    
96     128    
32     32     
-416   -112   
176    128    
-224   -192   
-256   -32    
96     176    
-176   32     
160    176    
-720   -192   
-336   -32    
-1456  -240   
-144   0      
176    -32    
-144   64     
-16    -80    
-64    -48    
-240   -192   
0      64     
-208   -48    
304    256    
-96    192    
-176   -144   
-48    32     
48     144    
-336   64     
-48    -48    
64     144    
288    48     
-256   -64    
-272   -336   
128    48     
-16    -48    
-16    112    
96     208    
-128   -112   
112    144    
0      -64    
-112   64     
-144   16     
192    192    
-96    -48    
-32    16     
-528   -16    
-48    32     
-32    0      
112    144    
32     -16    
112    96     
-64    208    
-144   128    
-96    16     
-48    16     
16     16     
80     144    
-208   192    
-224   -96    
-64    -160   
-304   -144   
32     128    
16     0      
-144   -64    
-144   -336   
192    -304   
-96    -192   
48     -144   
48     -48    
128    160    
-96    48     
64     -80    
-16    -288   
-224   -272   
-16    16     
-16    48     
-80    208    
-160   -16    
64     -48    
112    -96    
-320   16     
64     -32    
0      -240   
32     592    
128    64     
-144   -112   
0      64     
0      -80    
-16    0      
16     160    
-288   128    
352    -352   
-528   352    
-192   -640   
224    288    
-16    272    
128    224    
-176   -368   
-112   -240   
-64    -208   
48     -208   
144    -336   
176    336    
-32    240    
48     -32    
-48    0      
-48    160    
-224   -128   
240    -288   
-64    32     
-96    -80    
80     -448   
128    400    
48     160    
64     -32    
-64    128    
-16    -48    
32     -64    
-64    0      
-96    -64    
-112   48     
400    384    
-96    320    
160    -160   
-16    96     
-16    -32    
112    -208   
64     240    
128    192    
-352   48     
-48    -464   
160    -16    
0      544    
-176   0      
80     128    
-32    -96    
-32    176    
-224   400    
0      -160   
-64    160    
160    48     
192    1472   
0      -176   
-432   -896   
80     -192   
-176   432    
-80    -144   
-16    -176   
208    -272   
208    -16    
-96    544    
144    352    
-192   -288   
-48    272    
-160   320    
144    0      
-448   -288   
560    224    
-320   336    
128    -160   
-272   192    
48     -32    
192    160    
-288   192    
224    -448   
-160   64     
96     0      
208    16     
-144   192    
48     80     
-160   720    
208    -480   
-224   176    
-144   224    
112    -352   
48     112    
0      48     
48     80     
16     144    
-80    64     
-176   48     
240    64     
-112   96     
48     32     
-48    32     
240    208    
-64    240    
80     -112   
448    384    
-176   -112   
288    608    
-224   -256   
176    96     
-224   48     
-32    -96    
64     240    
144    64     
-64    160    
0      144    
272    816    
0      272    
-128   -16    
128    192    
96     -176   
-64    320    
48     -80    
0      -336   
48     592    
288    96     
-336   -32    
176    144    
-320   -832   
320    -16    
-64    208    
176    -112   
-112   496    
336    144    
16     16     
-48    96     
0      -16    
16     96     
-32    0      
32     96     
64     96     
32     -256   
-16    32     
208    -16    
-176   176    
-160   -304   
176    -208   
-16    480    
16     368    
-80    -80    
80     64     
176    288    
-160   416    
-32    -144   
0      -80    
48     128    
48     -336   
-80    192    
112    16     
96     -80    
-112   -384   
32     -96    
128    96     
96     192    
-96    224    
224    400    
96     144    
-64    144    
0      224    
80     80     
-96    0      
16     160    
96     208    
-32    144    
112    976    
48     -80    
-256   528    
176    112    
16     -128   
80     -160   
-48    -64    
-112   -192   
48     -96    
-112   -64    
208    32     
80     224    
-64    -32    
64     16     
96     -176   
-64    128    
16     -192   
112    160    
0      -1008  
-16    16     
0      96     
192    112    
-96    -96    
384    -144   
-224   -80    
272    96     
-16    112    
96     -112   
-32    112    
-224   -720   
224    -128   
-32    -128   
224    160    
80     144    
-16    64     
112    96     
112    96     
-48    48     
80     128    
-32    0      
80     -32    
192    48     
144    16     
112    128    
64     -208   
256    128    
80     -160   
32     96     
192    -128   
-96    96     
-64    32     
32     80     
-176   -160   
16     -64    
240    304    
48     32     
-128   128    
32     -208   
240    80     
192    -128   
80     128    
112    -96    
-288   -336   
336    -208   
-16    512    
64     192    
80     224    
32     320    
0      -80    
-160   -448   
144    -112   
256    32     
192    -112   
64     224    
112    144    
96     176    
-32    -144   
32     0      
112    -112   
0      -816   
32     80     
416    -288   
-224   144    
-528   -160   
-208   -352   
32     128    
128    144    
-128   160    
112    -352   
-16    0      
144    32     
-48    -272   
272    -176   
80     -448   
0      -640   
-128   -192   
64     -656   
-48    128    
-96    160    
208    80     
-16    64     
112    -144   
-336   -624   
432    -656   
-224   32     
-96    -256   
-32    0      
128    144    
16     -112   
64     0      
-64    96     
-176   -96    
192    16     
-272   -16    
80     -48    
0      -128   
128    -48    
-16    -112   
-176   128    
128    -80    
64     -384   
-16    -144   
144    0      
80     112    
80     -16    
-32    64     
224    -32    
-16    -96    
-160   32     
32     -16    
-448   -128   
128    -240   
16     80     
320    -48    
-48    -16    
80     -448   
-16    -16    
32     -1600  
-16    16     
128    64     
16     -16    
-288   -240   
192    -80    
-192   -80    
48     32     
-288   -32    
32     -96    
-48    -48    
64     -208   
32     16     
32     -80    
96     144    
0      -624   
-80    96     
48     -288   
0      16     
-32    32     
-16    -48    
-128   32     
272    16     
-304   -16    
80     0      
-1280  64     
-64    48     
32     48     
96     176    
-192   208    
-176   -224   
-32    -80    
384    -384   
144    -64    
64     128    
48     -80    
128    32     
-144   -336   
-352   32     
352    304    
-256   -48    
0      16     
-288   144    
-48    -608   
48     -176   
112    -320   
64     112    
176    -192   
80     -112   
-144   -224   
96     96     
-224   304    
144    128    
-192   -32    
16     -208   
-16    -128   
112    16     
-624   -176   
144    -384   
-16    144    
144    352    
144    320    
-128   240    
-96    -80    
64     80     
-160   -96    
-32    -208   
-192   -96    
240    -416   
80     64     
-32    -32    
-64    -80    
-352   480    
208    -352   
-112   80     
96     32     
96     64     
-144   48     
-192   -32    
0      48     
32     -16    
160    192    
160    -320   
0      560    
-160   -496   
0      -272   
96     -160   
64     -64    
-144   48     
64     -384   
-32    -208   
-144   176    
-416   -368   
-336   -144   
192    352    
-624   352    
-16    128    
-480   -384   
-288   -480   
48     -272   
176    -48    
-48    448    
48     464    
-480   -96    
-96    -48    
-352   -176   
16     -64    
-224   80     
-16    224    
-48    32     
32     -112   
-16    -16    
-240   208    
-112   128    
176    -160   
-240   208    
-160   -64    
16     -32    
-240   -224   
80     160    
-144   80     
-48    368    
192    192    
-240   32     
-144   -80    
-80    32     
-144   240    
-256   -128   
128    -32    
-256   -176   
-48    112    
-96    48     
16     224    
144    -640   
64     -192   
0      192    
-16    208    
32     112    
-112   32     
-128   192    
288    192    
-208   80     
-576   -1008  
304    336    
-272   560    
-400   -80    
368    -864   
0      144    
192    192    
-112   160    
-320   -224   
32     -1184  
352    480    
-176   608    
-176   -176   
48     96     
-16    48     
-224   48     
-144   -112   
-208   -400   
272    -304   
-576   304    
352    416    
0      -320   
-144   -192   
128    96     
-128   224    
48     32     
-208   384    
208    -64    
-128   192    
-176   -144   
-224   80     
160    64     
-288   0      
16     64     
-272   -528   
112    128    
-176   -160   
96     448    
-48    -144   
-96    -352   
128    240    
-128   -352   
-176   -352   
144    48     
-48    -16    
-208   -288   
240    240    
-384   -48    
32     -384   
-112   208    
-16    208    
144    -16    
-32    176    
-64    160    
48     -368   
-128   112    
224    224    
-112   320    
208    32     
-464   -336   
336    -496   
-144   176    
96     256    
0      176    
-304   -352   
-176   -336   
96     432    
-48    448    
-16    -96    
-80    -64    
144    304    
-160   240    
16     64     
224    112    
-208   32     
-96    -80    
-96    -64    
-160   0      
64     80     
48     224    
-112   240    
-48    -32    
16     -48    
0      -32    
96     48     
48     -144   
16     -128   
16     64     
-80    -320   
32     -64    
-112   -48    
128    192    
-160   -48    
160    144    
96     112    
48     48     
-16    48     
0      -16    
-48    -208   
208    16     
-32    112    
32     16     
176    256    
-176   208    
-64    192    
64     -16    
32     64     
64     80     
-112   96     
-48    48     
160    64     
0      96     
-64    48     
48     0      
-16    48     
112    48     
-48    32     
48     176    
-96    -144   
368    -128   
-112   -48    
0      112    
-32    -48    
-112   -16    
32     0      
-16    128    
208    160    
-240   -32    
224    80     
-192   32     
48     96     
-48    32     
-80    96     
128    80     
-32    112    
-128   -16    
128    -80    
-336   -688   
64     -32    
96     400    
96     176    
-176   112    
64     64     
-80    176    
112    80     
-192   -208   
176    96     
112    320    
48     -96    
32     80     
112    -32    
-16    240    
80     64     
0      -16    
192    -128   
-224   -176   
288    176    
-32    256    
144    224    
48     160    
-48    16     
160    -80    
-288   -240   
80     -80    
-112   -160   
192    48     
-128   80     
-48    -160   
288    -624   
-48    128    
-96    112    
96     208    
32     128    
32     128    
48     160    
-16    32     
-96    112    
32     112    
176    272    
-320   -32    
0      16     
432    -304   
-160   0      
192    -48    
80     144    
0      -16    
0      -80    
128    80     
64     112    
-64    80     
176    80     
-96    -32    
32     128    
-48    32     
32     160    
-64    272    
144    -192   
-16    240    
128    0      
16     80     
-32    -272   
-48    64     
-80    -240   
144    208    
0      -16    
-240   208    
240    -16    
-288   -32    
432    0      
-16    160    
176    48     
-48    -144   
112    64     
304    80     
-320   96     
64     -1216  
48     80     
-32    -208   
336    16     
160    -16    
0      64     
-32    96     
128    80     
208    0      
-192   192    
160    272    
-112   0      
272    160    
-128   -112   
176    112    
32     -560   
32     -32    
192    -192   
16     80     
96     -112   
96     128    
-112   16     
64     160    
144    64     
32     48     
128    144    
-80    0      
32     -96    
0      -784   
80     -16    
-48    -96    
112    80     
112    -80    
0      -48    
64     -32    
192    96     
64     64     
-16    128    
-32    -288   
-16    -128   
128    80     
96     -896   
32     0      
48     -224   
-96    48     
112    32     
-32    288    
16     -256   
32     -352   
-48    -176   
208    -16    
0      -240   
-48    96     
112    128    
-16    0      
128    80     
-16    80     
48     16     
64     -80    
48     48     
144    -480   
16     80     
32     -128   
64     96     
64     48     
64     -16    
-32    16     
64     -1088  
192    -320   
-112   -160   
256    -288   
-256   -352   
-48    -288   
208    -224   
-144   464    
48     -528   
-16    336    
64     48     
-80    0      
192    0      
-32    -368   
32     -64    
-1040  48     
-16    -128   
96     -192   
144    208    
-32    -160   
32     -640   
48     32     
32     112    
-80    -80    
0      -160   
224    -48    
48     240    
80     96     
16     -272   
48     128    
-208   128    
-32    -64    
48     -320   
80     16     
128    -368   
-144   -656   
256    -240   
144    -128   
112    0      
112    -304   
-32    32     
224    -64    
-48    96     
224    64     
-144   -16    
32     64     
48     -96    
-848   -32    
16     -208   
112    64     
48     -32    
112    64     
48     -160   
-16    -128   
-272   -480   
-32    -272   
160    -48    
-16    208    
-112   0      
80     -160   
-64    80     
160    -48    
128    416    
-272   208    
48     160    
352    96     
-112   64     
128    -288   
-400   -272   
544    -1440  
32     384    
-192   256    
464    112    
-800   -304   
-112   -608   
-336   -176   
-96    192    
-48    -96    
-224   16     
-1344  384    
-112   432    
-240   192    
80     -240   
48     336    
16     -992   
-112   -288   
-192   -432   
32     -208   
160    224    
224    48     
-176   -112   
-48    -112   
224    16     
256    -80    
-560   16     
-80    -128   
-80    -80    
-32    -16    
-96    704    
0      -688   
-96    -160   
-80    -1776  
32     -672   
-208   -544   
368    -448   
-144   256    
192    64     
-208   -256   
448    304    
-352   320    
-176   -144   
176    -192   
144    -128   
-176   -176   
336    -560   
-80    96     
64     -1088  
144    -64    
-208   -32    
-208   -448   
160    -704   
-96    336    
352    256    
-32    -544   
-144   128    
144    528    
-80    320    
80     -48    
16     112    
96     112    
112    224    
-64    160    
128    -48    
-288   -160   
64     32     
-16    160    
32     176    
-160   80     
400    224    
-352   112    
128    96     
-256   96     
240    176    
-176   192    
-48    64     
-512   80     
-112   0      
-800   128    
-224   -128   
32     256    
-96    96     
240    272    
-256   128    
16     -96    
-96    256    
-512   32     
-96    -80    
224    -48    
-160   80     
-448   -400   
-208   -32    
64     176    
-272   -64    
-96    -32    
80     64     
-144   -48    
-32    -80    
-48    0      
-32    0      
-32    96     
-224   192    
48     80     
-224   256    
144    48     
-96    64     
-48    16     
0      112    
64     64     
-112   48     
-272   0      
-16    16     
-208   -96    
32     -48    
208    -208   
96     16     
-16    -80    
0      64     
128    -176   
16     16     
0      64     
-176   16     
-16    112    
144    240    
-384   64     
112    -96    
-112   80     
64     -32    
80     80     
-848   160    
-112   336    
32     -112   
64     144    
208    192    
-48    64     
-48    -32    
80     80     
96     -48    
16     16     
16     80     
16     -80    
64     0      
16     48     
48     80     
-432   -80    
48     112    
-112   -144   
112    96     
64     32     
-16    -16    
0      32     
32     64     
-128   48     
-16    160    
64     48     
64     144    
-64    64     
-208   0      
64     32     
-160   0      
48     96     
-32    96     
-192   32     
160    0      
-224   0      
48     48     
-64    48     
-224   -48    
336    0      
-240   -16    
-176   48     
176    112    
-240   96     
-32    96     
16     128    
64     0      
-368   -96    
-64    32     
0      32     
-64    32     
80     0      
-112   -96    
16     32     
-96    48     
32     112    
-32    16     
0      144    
-64    64     
-16    96     
-64    208    
96     128    
-496   -336   
112    64     
128    336    
-176   32     
32     0      
48     -64    
32     -32    
-80    -16    
-96    -16    
80     -32    
32     208    
-192   -80    
176    96     
-256   -64    
240    112    
-304   -48    
96     80     
208    400    
-112   32     
-96    -144   
112    -96    
-96    112    
-176   160    
144    16     
0      96     
240    48     
-304   -80    
192    272    
-16    16     
144    160    
0      64     
-160   -256   
-112   16     
-96    -16    
16     16     
-64    80     
-144   -336   
112    224    
304    400    
-368   16     
-80    -432   
48     48     
80     160    
-192   -16    
0      128    
112    32     
-80    80     
128    112    
128    192    
32     -48    
112    96     
384    272    
-48    32     
16     80     
16     0      
-16    -144   
0      96     
208    208    
-336   192    
80     -64    
48     144    
224    -16    
0      96     
176    80     
0      16     
96     64     
240    128    
-224   112    
-48    48     
16     96     
160    112    
-224   -64    
-32    32     
-48    -16    
-80    160    
32     80     
288    240    
-224   160    
144    80     
80     96     
48     48     
16     -16    
224    -64    
640    464    
-576   160    
144    96     
16     -32    
176    80     
208    16     
-144   0      
240    80     
96     96     
32     128    
32     96     
0      112    
160    160    
-48    64     
-16    -32    
16     0      
160    32     
320    224    
-272   -128   
128    400    
-96    224    
64     -1600  
48     -144   
-112   -192   
160    -288   
48     192    
-240   -384   
-48    -176   
128    80     
-144   -112   
432    448    
-416   -64    
128    -288   
32     272    
48     64     
416    944    
-528   -1424  
32     160    
16     -336   
-32    144    
240    528    
-272   -48    
288    48     
-80    64     
-48    64     
-16    96     
304    96     
-80    64     
-64    32     
96     -48    
16     80     
0      -496   
240    208    
-48    352    
96     160    
32     -32    
64     448    
96     64     
-80    160    
48     0      
-64    96     
16     224    
160    192    
-144   272    
176    16     
-96    -48    
80     -256   
112    -112   
-64    -496   
80     96     
-128   48     
64     48     
-48    -176   
144    112    
-48    80     
32     16     
-208   -288   
80     -464   
64     64     
32     0      
64     80     
0      -48    
48     64     
-16    -480   
0      48     
176    -1600  
-16    288    
-80    224    
-32    192    
0      -208   
208    -32    
-160   64     
176    -80    
80     112    
32     64     
96     16     
128    -16    
48     112    
208    -512   
-32    96     
112    -96    
-80    80     
96     32     
-48    80     
0      -160   
128    160    
16     -144   
64     -48    
256    192    
112    -768   
-64    112    
144    -352   
96     336    
96     -320   
-144   144    
560    208    
16     688    
304    304    
-48    96     
160    -48    
272    192    
272    288    
-32    -64    
208    96     
16     224    
-160   80     
400    -272   
-96    512    
112    -48    
96     -48    
192    -144   
-112   -176   
-32    272    
592    128    
-416   -128   
176    -1648  
320    112    
304    144    
-16    -128   
240    -64    
-32    240    
96     272    
64     176    
-128   -64    
-48    -240   
-64    -128   
288    -1008  
-272   -144   
128    -160   
-48    112    
-1376  -368   
-80    -496   
320    32     
-192   -656   
176    48     
-32    -832   
144    -160   
144    80     
-64    -208   
32     -80    
-64    32     
192    -64    
128    320    
96     -192   
-144   64     
64     480    
48     48     
-112   -16    
144    48     
80     -160   
-304   -528   
208    -224   
-144   -800   
160    -304   
80     224    
80     64     
0      144    
224    64     
80     -112   
16     80     
-128   16     
-48    0      
-608   176    
-16    -496   
112    -336   
-96    -528   
272    -400   
160    -112   
416    160    
-160   -112   
208    96     
144    -160   
64     112    
144    80     
288    240    
-528   -128   
224    32     
-560   0      
80     32     
0      -112   
80     0      
96     16     
208    -112   
-560   -112   
128    -1712  
-16    64     
144    -32    
96     64     
0      -16    
64     48     
-304   -32    
128    80     
16     32     
0      -32    
-816   -16    
256    128    
-80    0      
-32    -144   
-32    0      
48     -208   
-16    96     
144    -16    
-64    -32    
32     144    
96     -160   
16     -80    
48     112    
-16    -32    
0      -16    
-576   48     
112    -16    
-208   96     
112    -192   
-80    16     
224    -224   
-48    -32    
64     -128   
144    -16    
-256   -32    
176    0      
0      16     
-16    -48    
32     -128   
-144   -80    
-80    80     
-112   -240   
-400   48     
192    -32    
-64    128    
224    -368   
-96    -48    
224    -2592  
-16    -112   
-96    -64    
64     32     
-80    0      
128    32     
-304   -32    
288    -32    
-96    -32    
-128   -144   
112    64     
224    80     
-256   16     
128    -192   
320    256    
-384   16     
128    -16    
-48    -16    
112    -32    
-176   -32    
48     -80    
-64    0      
128    48     
-128   80     
112    32     
-64    32     
208    -176   
-128   16     
16     -144   
144    144    
-48    0      
-1376  32     
160    176    
112    144    
-352   -16    
224    32     
-192   -176   
160    -16    
-224   -64    
-512   -176   
-288   208    
-784   -96    
-96    -32    
-256   -16    
32     48     
-176   80     
48     48     
144    128    
-432   144    
-32    160    
256    160    
-160   144    
48     48     
-112   -32    
-208   -96    
0      128    
-320   0      
64     16     
-192   -144   
-64    -272   
-32    80     
-192   80     
-48    64     
-32    192    
-48    0      
-304   32     
128    48     
-112   -96    
288    160    
0      80     
0      256    
80     -32    
-32    64     
32     80     
0      48     
-32    -64    
112    80     
-16    48     
-256   80     
-64    -96    
-592   -112   
-208   -16    
-1184  -320   
160    32     
-48    48     
160    112    
-288   -160   
48     0      
-48    0      
128    64     
192    112    
-224   32     
-336   -96    
-16    0      
144    96     
-48    64     
-112   16     
-416   -416   
160    -112   
96     0      
-48    0      
-64    -64    
-96    144    
112    32     
-176   48     
144    80     
-176   -32    
0      32     
-352   -32    
288    -64    
64     96     
32     96     
-416   -192   
320    176    
-400   0      
304    544    
-16    0      
-96    -96    
0      -64    
-304   112    
80     112    
-112   64     
0      176    
-80    0      
-144   80     
-128   48     
-144   64     
-208   -128   
64     16     
-528   0      
256    160    
16     112    
-80    256    
80     176    
-112   16     
-96    32     
160    80     
-144   -144   
-128   -64    
144    16     
-128   0      
-160   144    
240    368    
-96    608    
96     352    
-112   16     
144    -80    
-96    -48    
-128   128    
-272   -576   
-96    -208   
96     336    
-112   48     
-80    48     
144    96     
-240   64     
192    -80    
64     432    
80     480    
-352   -80    
448    -208   
-432   -192   
352    128    
-160   32     
144    112    
96     432    
-208   -560   
-192   -160   
144    416    
48     -32    
-176   -208   
48     448    
-80    -48    
-32    0      
64     112    
32     112    
-32    96     
240    208    
16     160    
-128   -368   
-96    208    
288    16     
-176   192    
128    176    
-192   -160   
-16    96     
160    96     
-192   16     
112    96     
16     80     
272    96     
-80    96     
32     48     
80     48     
-48    48     
32     96     
-128   0      
240    160    
-160   -16    
-64    432    
-96    80     
-112   16     
16     96     
32     160    
0      64     
0      0      
96     64     
-32    -160   
-64    208    
48     80     
80     -32    
-64    96     
144    160    
-208   192    
-48    96     
80     -16    
-32    48     
-80    64     
32     32     
128    160    
48     32     
-16    192    
96     0      
176    96     
16     0      
16     80     
16     240    
144    32     
-32    144    
0      96     
-80    96     
80     112    
0      112    
48     160    
-16    -16    
96     64     
32     112    
288    256    
-176   336    
-240   -144   
144    -368   
256    -16    
0      208    
96     -16    
0      112    
32     0      
-80    144    
240    96     
176    -448   
-160   -176   
-240   -496   
352    -144   
48     256    
128    256    
48     336    
0      384    
-80    -208   
128    112    
-448   -624   
-48    -720   
-128   -96    
272    -208   
32     336    
112    -1056  
96     256    
-192   -336   
112    64     
-16    176    
176    -192   
112    -16    
-16    224    
48     -16    
16     224    
-16    -160   
64     256    
80     -176   
-304   -288   
208    -16    
-176   -608   
144    -240   
160    -224   
-16    16     
64     128    
48     176    
80     464    
240    288    
-176   -96    
112    80     
-16    -32    
176    240    
192    480    
-144   112    
320    80     
80     -256   
-64    0      
-208   -1872  
160    224    
192    224    
-416   -32    
96     -464   
-96    32     
80     0      
-16    64     
64     -32    
224    208    
-16    192    
288    -208   
-160   16     
432    336    
-592   -208   
80     16     
160    240    
-48    -160   
320    272    
-32    -80    
-96    224    
336    -32    
-240   160    
240    -128   
-416   -176   
352    208    
-96    16     
16     32     
64     64     
144    128    
-32    -752   
144    48     
112    -560   
80     112    
208    -320   
-96    -80    
272    112    
192    112    
112    -64    
160    -128   
224    112    
272    -16    
-112   16     
-32    -912   
320    -64    
-128   -16    
160    64     
80     16     
176    128    
-192   -112   
176    48     
112    48     
272    32     
96     176    
64     -192   
128    80     
-32    -160   
112    80     
96     -144   
-48    32     
96     -208   
96     128    
0      -1120  
0      64     
-16    0      
-48    16     
176    128    
16     64     
-48    112    
32     -128   
32     -48    
96     80     
16     240    
224    0      
-176   32     
144    -16    
64     128    
32     -256   
32     -192   
96     320    
224    -608   
-208   224    
-160   96     
-128   -1360  
208    -64    
-208   -928   
112    -128   
144    -48    
112    -64    
128    112    
-80    -192   
208    112    
-400   -672   
400    -592   
-128   208    
112    -352   
-64    16     
-512   32     
-16    96     
256    16     
-288   80     
48     32     
128    112    
176    -64    
-112   -32    
96     -16    
272    128    
-160   16     
208    96     
112    176    
256    -240   
80     -112   
48     -80    
-96    -208   
16     112    
208    -96    
-128   -16    
160    -560   
96     32     
-16    176    
128    32     
80     -64    
-48    -32    
48     -192   
-32    0      
32     -32    
176    16     
-336   16     
64     -16    
-480   -64    
112    -176   
32     -144   
80     -400   
48     -112   
-64    -16    
0      48     
-48    -32    
-80    -32    
240    -256   
32     192    
-144   0      
-48    32     
304    208    
-16    -64    
-1424  -160   
400    -144   
-400   -96    
0      -64    
208    -144   
-96    -144   
64     0      
160    -1440  
0      16     
160    -48    
0      64     
16     48     
-112   -160   
208    -16    
-48    -208   
-128   0      
16     -16    
-112   352    
80     48     
-272   -112   
176    -240   
-16    -32    
112    -288   
-96    -64    
240    -80    
64     -64    
-80    -32    
112    -176   
48     96     
-176   -64    
144    128    
-64    80     
-464   -96    
16     -176   
-1616  0      
160    -608   
128    -96    
240    -32    
-48    16     
-64    -1872  
208    -240   
240    752    
32     352    
-176   -96    
128    160    
-208   -240   
256    0      
-224   64     
272    -112   
64     -112   
-32    -176   
160    160    
16     -176   
-32    192    
272    160    
-144   -16    
-112   -96    
-96    -32    
320    144    
-240   -96    
-240   128    
48     -96    
48     48     
64     -80    
432    272    
16     -144   
-16    -48    
32     -240   
96     -128   
352    -304   
224    -16    
80     240    
-192   -192   
-160   -64    
208    16     
-96    240    
368    224    
-368   224    
160    -96    
-256   64     
-1056  -256   
0      -32    
-224   -224   
-384   48     
-80    240    
-112   432    
-464   -112   
-1184  -368   
-64    -128   
80     -112   
-112   -80    
128    160    
-160   0      
-752   -576   
112    224    
-160   -464   
304    144    
-320   16     
0      64     
-240   64     
48     48     
-192   352    
-160   -416   
48     352    
-480   64     
48     -80    
64     -16    
-16    16     
-144   -112   
64     64     
-16    -64    
160    176    
-16    208    
-64    48     
-128   -64    
-144   -128   
64     320    
-352   -112   
160    -528   
-992   128    
-160   -48    
-544   -208   
-160   96     
128    48     
144    256    
192    304    
-80    640    
64     256    
-160   48     
96     -32    
-128   -192   
160    48     
-192   -16    
-48    432    
-32    -16    
-80    -160   
192    656    
-320   384    
48     -128   
144    112    
-48    176    
-336   -192   
16     32     
224    192    
-96    32     
96     16     
-144   -16    
128    64     
-144   32     
0      48     
16     32     
-144   32     
128    0      
-304   272    
96     -48    
-320   -512   
-80    -160   
208    48     
-128   160    
-16    16     
-384   -208   
-16    -144   
-96    -32    
0      -176   
16     -32    
48     400    
-352   -128   
-80    112    
-1712  -16    
112    48     
-48    16     
80     -80    
-144   -224   
192    -96    
-144   112    
256    16     
-144   144    
48     112    
32     -32    
-160   64     
0      16     
-128   32     
-32    96     
208    288    
-144   464    
528    160    
-576   -512   
528    -64    
-256   928    
-80    96     
0      -416   
16     112    
16     32     
80     128    
-272   -96    
112    304    
-64    48     
-16    -80    
-48    -96    
-160   208    
112    64     
-96    80     
48     208    
48     48     
-80    -96    
-128   -48    
64     272    
96     336    
-160   -96    
0      -96    
352    368    
-336   112    
176    176    
-176   16     
128    688    
-48    336    
-192   272    
192    432    
112    112    
-32    32     
-80    -16    
16     -16    
48     80     
-16    -80    
-128   144    
112    48     
-288   112    
336    -144   
-32    64     
96     160    
-64    128    
-32    -16    
144    80     
128    112    
48     80     
-496   -288   
528    -144   
-16    240    
-16    208    
-272   -80    
-80    -64    
64     64     
-112   96     
-48    128    
0      -16    
-176   64     
320    496    
48     304    
-48    144    
80     208    
80     160    
-192   32     
-96    16     
-48    48     
-112   -48    
0      -112   
112    -16    
112    176    
-32    112    
-32    80     
16     32     
16     96     
224    480    
-288   32     
80     -96    
368    48     
-176   -160   
-32    -160   
160    16     
-176   0      
176    -48    
48     80     
96     32     
-208   -48    
-80    -16    
480    -80    
-128   -48    
352    48     
304    144    
-64    32     
-208   -80    
-32    64     
96     16     
-16    192    
112    80     
-16    16     
-32    -368   
160    208    
304    240    
-128   208    
0      160    
-112   176    
-16    208    
-256   80     
32     32     
-80    48     
16     208    
-144   0      
80     176    
-32    48     
80     256    
32     160    
-64    -640   
208    112    
208    96     
16     32     
224    160    
-192   -16    
160    64     
-16    16     
80     0      
208    112    
-32    0      
16     -16    
224    256    
-224   0      
144    128    
-64    80     
128    112    
48     48     
-32    32     
272    128    
-16    128    
-16    -192   
128    -64    
80     240    
128    16     
-112   16     
32     32     
-112   16     
32     -80    
96     32     
-144   -320   
304    80     
64     -1760  
-112   192    
144    64     
-80    128    
96     32     
16     32     
0      -304   
-48    96     
-16    -32    
128    224    
-144   -64    
48     -112   
144    160    
0      -560   
-176   -80    
176    -672   
400    80     
-384   208    
160    16     
-16    32     
16     0      
48     160    
144    112    
-32    32     
64     80     
128    112    
80     48     
160    192    
-48    16     
304    352    
-368   -448   
192    208    
160    -528   
0      96     
16     -80    
0      112    
208    144    
-64    176    
64     128    
-96    32     
112    160    
96     -80    
-16    48     
192    -576   
-80    176    
-32    -784   
80     96     
96     -320   
16     320    
144    112    
-48    64     
96     48     
16     144    
-16    32     
-48    0      
96     288    
112    128    
-80    16     
160    -32    
-160   0      
128    -176   
48     112    
32     -128   
192    160    
-144   32     
112    272    
48     224    
-80    -208   
80     -96    
80     16     
-160   32     
336    -112   
480    640    
-560   176    
320    144    
-96    112    
112    448    
176    192    
-208   -176   
160    144    
96     32     
-16    64     
-496   80     
0      -1184  
112    -48    
-48    -2080  
160    -416   
192    -16    
160    16     
112    80     
64     -336   
208    48     
16     -96    
96     -656   
80     112    
-48    -336   
-32    288    
-320   32     
-160   -400   
96     -160   
-176   -928   
208    304    
48     16     
0      0      
256    336    
16     -336   
-16    -960   
304    144    
-176   -112   
96     272    
0      -256   
48     -304   
-32    -64    
-32    -112   
0      -384   
288    224    
64     480    
-160   -880   
240    304    
400    -1472  
-272   -208   
-32    -336   
112    272    
160    -32    
-160   -144   
304    128    
-224   -384   
-16    -48    
112    -80    
-1280  -416   
240    112    
-112   -80    
96     80     
-32    -48    
192    -528   
-32    224    
-64    -96    
144    -320   
224    528    
-128   144    
16     -224   
32     -16    
0      -96    
224    0      
-64    80     
192    144    
-48    -272   
288    -144   
-272   -16    
464    -128   
0      464    
144    -1008  
256    -272   
-96    192    
-96    -240   
384    16     
32     368    
96     160    
16     224    
-272   -272   
160    -480   
-608   688    
48     112    
0      -48    
112    -16    
-16    -80    
192    -80    
112    -16    
-192   112    
304    -64    
-80    64     
64     -272   
-144   -128   
32     -608   
-80    80     
224    400    
-640   304    
-208   -16    
304    -256   
80     -96    
-144   64     
16     -912   
96     144    
-80    96     
288    -272   
-368   -96    
208    -176   
80     64     
128    432    
-192   -144   
16     -80    
64     64     
-16    160    
48     224    
32     -544   
192    176    
0      -336   
256    336    
-400   496    
-96    -608   
336    -208   
96     -48    
-160   0      
-48    -48    
80     80     
144    -32    
-112   -16    
48     -176   
96     48     
80     -48    
-16    112    
80     -208   
16     64     
-208   -48    
176    -96    
-64    176    
144    192    
-112   544    
-208   -240   
160    -528   
-32    672    
-112   -80    
-16    -720   
112    384    
48     -16    
-16    80     
-432   160    
-688   0      
-432   -384   
-96    112    
-48    304    
-272   64     
-160   224    
64     -16    
-304   -96    
80     16     
208    288    
-928   -128   
336    128    
48     -32    
112    96     
-16    -32    
-288   128    
-96    80     
-128   -496   
160    304    
32     144    
-176   0      
-304   -560   
48     -64    
144    48     
-32    112    
-64    -80    
0      80     
-192   64     
128    16     
-112   64     
-32    544    
128    384    
-224   32     
-16    48     
-464   -112   
176    -96    
-80    -32    
272    320    
-32    240    
-368   224    
-112   -320   
176    176    
-112   -112   
-128   16     
96     -112   
-16    -64    
48     48     
-144   16     
240    176    
-336   144    
-32    48     
-352   -32    
-64    48     
144    -48    
-48    80     
-48    -128   
32     80     
0      -80    
-48    32     
-240   32     
-64    144    
176    16     
-288   48     
208    48     
-320   32     
0      16     
-96    32     
32     32     
-608   -48    
352    416    
-496   -112   
272    -16    
-192   -208   
16     48     
48     96     
-192   0      
96     48     
128    256    
-336   32     
-96    -256   
48     -288   
-192   -336   
400    288    
-240   -16    
64     64     
-352   -32    
128    112    
-176   32     
80     160    
-192   128    
-192   144    
-272   -32    
32     176    
208    192    
16     176    
128    48     
-208   96     
96     64     
-48    176    
-16    336    
-368   32     
-80    -48    
0      -16    
-32    -16    
-144   -96    
-240   -144   
-112   32     
-240   160    
-128   -32    
-112   176    
-80    112    
-192   -32    
112    32     
-96    64     
48     176    
-688   160    
240    272    
-128   0      
-208   48     
128    128    
-96    128    
-384   160    
208    48     
0      0      
48     96     
-16    64     
-256   48     
112    -16    
0      -16    
384    208    
-352   32     
48     32     
112    16     
-32    -64    
96     96     
16     80     
416    368    
-352   64     
320    144    
-176   96     
-112   64     
-128   48     
256    80     
48     96     
-160   64     
176    208    
32     48     
-176   32     
144    0      
160    192    
112    192    
48     16     
-64    -16    
96     112    
-96    -96    
32     -16    
64     144    
176    128    
-256   -16    
-32    112    
96     48     
-48    64     
-16    64     
16     80     
80     96     
-64    32     
160    64     
-224   80     
336    432    
48     64     
-48    32     
-64    -16    
176    112    
-112   -16    
-16    96     
192    224    
-160   0      
80     112    
192    112    
-96    80     
-48    -16    
32     32     
80     80     
160    -48    
0      -144   
112    -32    
-176   0      
208    400    
16     128    
-32    80     
128    64     
112    80     
0      0      
-80    -128   
208    -288   
208    112    
-112   272    
0      96     
96     64     
-96    -96    
96     144    
16     0      
48     112    
-80    0      
288    192    
112    240    
-112   0      
-96    208    
-16    32     
-64    0      
-160   32     
368    160    
-128   48     
64     240    
-144   -240   
112    336    
0      -144   
224    256    
-64    336    
48     112    
16     256    
-80    -32    
64     0      
32     272    
192    64     
-80    64     
128    96     
-192   -48    
16     -512   
16     304    
96     336    
-48    112    
-80    -64    
64     128    
32     -816   
-16    -32    
160    368    
64     176    
-128   -96    
160    -544   
32     432    
-16    -448   
64     0      
240    832    
-96    -368   
144    -288   
-112   144    
320    -1088  
-16    320    
144    -160   
48     64     
112    224    
-224   -16    
128    -592   
96     496    
112    480    
-176   -320   
16     -256   
272    736    
-112   32     
128    96     
32     224    
272    304    
-256   272    
48     -400   
288    448    
-112   -784   
432    432    
-384   0      
208    -352   
192    48     
-32    64     
0      128    
-192   -16    
160    -112   
112    96     
224    368    
112    176    
16     144    
-32    -384   
-48    -160   
144    -192   
-528   -560   
48     -176   
128    384    
288    384    
-208   256    
464    304    
0      672    
-144   -112   
-160   -448   
112    16     
384    -32    
-384   48     
336    -112   
160    160    
256    -112   
48     -80    
-384   -2032  
448    -160   
-208   224    
48     128    
112    -144   
-560   -336   
144    -304   
352    -96    
304    624    
-192   -256   
32     -448   
48     288    
176    -32    
128    -96    
288    512    
-144   -16    
96     128    
128    288    
0      720    
224    -448   
128    160    
-64    336    
-240   -1376  
16     96     
96     -128   
-176   144    
-80    -80    
368    400    
-336   -400   
160    -80    
-160   -224   
80     0      
16     96     
-144   48     
224    -160   
-224   -176   
240    224    
-96    -352   
144    192    
-16    0      
-32    64     
-16    -336   
96     -32    
128    192    
-144   -96    
432    208    
-208   -16    
112    128    
-928   -2768  
608    -224   
-784   960    
368    -592   
96     624    
32     -160   
624    272    
-576   528    
384    -592   
-144   480    
-32    160    
496    368    
-384   -128   
176    -864   
-96    -256   
128    80     
-208   -128   
320    -352   
64     256    
16     64     
160    176    
-32    -128   
128    -624   
64     144    
48     -16    
32     -16    
0      128    
384    80     
32     -32    
48     32     
16     64     
128    -112   
-448   -96    
32     -240   
-96    -64    
80     16     
336    384    
-112   304    
-32    112    
208    -512   
-16    64     
-80    -64    
176    288    
32     -16    
160    320    
304    208    
-16    -16    
-192   -64    
64     400    
-592   208    
-96    144    
224    -64    
32     -80    
-16    -192   
64     -512   
16     176    
16     16     
144    144    
16     -80    
80     0      
0      -32    
96     -112   
-224   0      
160    32     
0      176    
80     0      
0      16     
-192   -192   
208    128    
-80    -272   
32     -32    
96     -624   
-128   64     
-80    32     
32     80     
-208   48     
0      80     
-160   0      
48     -32    
-768   -160   
304    -144   
-1312  -16    
224    0      
64     -32    
0      -192   
64     96     
288    -384   
-240   -32    
48     -80    
352    48     
-336   48     
288    96     
-208   80     
400    144    
-288   128    
-48    32     
-176   16     
0      128    
-80    -16    
48     -240   
64     48     
48     -320   
48     80     
80     32     
112    80     
16     96     
144    32     
-256   0      
32     96     
176    160    
-304   64     
288    144    
-256   48     
-208   80     
96     -224   
-80    368    
368    224    
-160   352    
-48    304    
48     -16    
-192   144    
-48    16     
-240   32     
80     -32    
-208   16     
224    -112   
-32    -48    
240    -304   
64     -64    
272    -528   
-400   -640   
-128   -832   
-128   -224   
16     -336   
-192   -272   
128    -304   
-48    16     
-96    416    
80     320    
-224   96     
-64    -48    
-528   -64    
48     -32    
-64    320    
-336   -16    
-96    -32    
-592   -352   
224    208    
-32    64     
-320   496    
64     112    
-1216  64     
-208   16     
0      -48    
48     32     
160    80     
-320   -32    
-160   -16    
224    80     
32     -128   
-224   48     
96     -176   
-64    64     
32     32     
-272   -96    
32     0      
0      -16    
-192   -16    
-240   -48    
-96    -64    
320    96     
-48    16     
-256   -176   
80     64     
-416   -384   
272    144    
-96    128    
-112   0      
-160   16     
32     48     
16     80     
-128   32     
160    112    
-304   64     
32     272    
-384   128    
-176   -16    
48     16     
-240   -96    
-64    16     
160    112    
0      64     
-160   -16    
-80    -64    
-32    48     
-144   208    
-80    48     
80     112    
0      128    
-80    224    
-352   -48    
-16    32     
112    -48    
96     128    
0      -16    
32     0      
-112   -48    
-112   -64    
144    112    
-96    16     
32     80     
-144   -16    
0      -16    
-160   -112   
-112   32     
-112   80     
-32    80     
-160   -144   
144    64     
-176   0      
192    128    
-272   64     
288    128    
-144   288    
-80    176    
320    208    
-352   64     
160    16     
-96    96     
144    64     
-352   -160   
176    -320   
-704   48     
192    288    
-384   -48    
80     16     
-208   -320   
-304   -624   
16     -432   
-160   -176   
0      -32    
16     0      
-16    176    
-128   -112   
48     -128   
-336   -112   
64     -112   
-432   -224   
160    176    
32     -16    
32     48     
96     272    
-160   96     
16     -288   
-32    160    
-16    176    
80     16     
0      128    
-416   -528   
256    0      
-336   32     
-192   -688   
-240   -96    
32     800    
128    0      
80     544    
0      -272   
-48    -272   
64     144    
32     160    
144    -32    
0      240    
96     32     
-208   -80    
272    128    
-160   -16    
-32    -208   
112    -160   
96     144    
-16    128    
112    16     
-80    64     
144    96     
80     112    
-96    -96    
240    32     
48     144    
160    624    
-64    320    
32     160    
-96    0      
48     64     
32     32     
-176   -272   
-224   0      
-32    48     
-240   128    
16     16     
-192   112    
-96    -16    
-192   -16    
-496   -304   
400    -528   
-112   16     
288    208    
-320   -208   
-128   -368   
16     -624   
-96    -256   
144    0      
64     32     
32     144    
48     64     
-208   128    
0      -64    
-272   48     
240    64     
-80    64     
-176   -240   
112    80     
128    32     
-256   0      
128    144    
-48    128    
112    96     
368    224    
-112   608    
-64    288    
384    272    
-112   176    
-128   -160   
192    -16    
64     448    
-400   96     
-48    -16    
32     -320   
0      -96    
-32    176    
224    192    
64     272    
-48    192    
16     128    
320    32     
208    336    
-16    -16    
144    0      
-48    -48    
400    416    
64     -32    
288    208    
80     -48    
48     -16    
-96    240    
-224   -400   
176    -208   
144    176    
416    928    
-224   368    
384    -288   
16     240    
112    -32    
-176   -160   
80     -240   
192    -192   
-48    -32    
-128   -208   
336    -1888  
160    1040   
32     176    
-16    -208   
256    304    
32     512    
48     96     
0      64     
144    352    
176    496    
32     192    
16     80     
16     -432   
240    -112   
-288   512    
48     -464   
32     -256   
240    432    
-224   176    
96     -176   
-112   -272   
80     64     
0      96     
-16    192    
32     192    
-64    272    
16     480    
16     160    
16     -432   
160    304    
192    96     
240    240    
96     128    
-48    48     
48     16     
-16    176    
208    -144   
80     48     
-48    32     
-64    160    
256    192    
-176   224    
32     176    
304    16     
-64    128    
112    0      
112    368    
400    -912   
-336   352    
208    176    
-192   128    
16     -64    
160    96     
0      -160   
0      -160   
-48    0      
128    -128   
80     -192   
16     -304   
304    -176   
32     -256   
112    0      
-16    -1168  
384    336    
-208   -1024  
-32    112    
16     -80    
0      80     
272    16     
-128   128    
160    80     
48     0      
224    192    
-96    -80    
176    304    
-32    32     
0      96     
192    -32    
0      32     
-48    -576   
288    144    
-112   80     
96     48     
48     64     
112    80     
288    416    
-256   -272   
-80    128    
240    -576   
-16    96     
-80    64     
16     80     
80     -288   
48     16     
16     -32    
-16    32     
144    -32    
-64    160    
176    32     
-112   80     
160    64     
-80    -224   
80     96     
32     48     
80     112    
-96    -256   
208    -48    
32     -112   
112    0      
-16    -176   
128    192    
64     112    
-32    -2320  
-48    -32    
16     -304   
-176   -256   
240    -16    
32     -208   
128    64     
-16    160    
128    -80    
160    144    
80     -96    
80     32     
0      -80    
160    -704   
0      80     
0      -720   
-32    208    
-528   -160   
-144   -352   
352    -112   
-48    48     
64     -112   
240    -1792  
0      160    
256    368    
-192   48     
320    -528   
-48    -48    
176    -128   
288    144    
80     -96    
-112   -176   
96     64     
288    -48    
-16    -144   
16     -320   
128    -96    
-32    -240   
32     0      
176    -272   
-32    -32    
0      -144   
-192   80     
320    -96    
-32    80     
176    16     
-176   192    
-128   -192   
160    256    
-1536  -64    
-128   -176   
80     -256   
112    -208   
208    128    
-160   -368   
128    -208   
-16    0      
16     240    
224    32     
-48    48     
48     32     
-96    -240   
16     -144   
0      16     
-80    -48    
96     -64    
0      144    
144    -272   
-96    0      
80     -272   
16     48     
-176   -592   
32     0      
16     -16    
16     32     
16     -80    
-240   -128   
-16    -16    
-80    -16    
-240   96     
16     -208   
80     -112   
64     -288   
16     -48    
64     -272   
16     96     
-96    -464   
320    64     
-112   -32    
64     0      
-64    0      
128    -96    
-64    144    
-32    16     
-720   -176   
96     -144   
-1104  -160   
32     32     
-48    -48    
48     -160   
-48    -16    
208    -128   
64     64     
128    -16    
-32    -48    
144    -80    
16     -96    
-368   48     
16     -96    
-80    0      
-64    -256   
64     96     
-128   0      
32     -32    
176    -256   
-16    80     
-128   -576   
176    16     
-48    320    
64     160    
-720   16     
176    -16    
-288   -48    
160    32     
-192   32     
32     64     
-80    32     
16     -80    
96     16     
32     -208   
16     80     
0      0      
160    80     
-416   -512   
-272   -768   
432    208    
-192   672    
-112   -656   
160    112    
-80    336    
112    -272   
-176   -16    
112    -96    
-16    80     
-208   -32    
80     96     
-672   -96    
-960   16     
-32    64     
-240   -48    
-32    400    
-80    864    
-192   -208   
192    720    
-224   -384   
-16    -144   
-112   -96    
-272   -144   
32     240    
-144   -64    
32     288    
-160   -416   
-336   -32    
-16    48     
-80    -96    
192    96     
-208   688    
64     256    
-1408  16     
-144   80     
208    -176   
-80    64     
-96    -80    
-48    160    
-112   48     
-240   -48    
48     -240   
16     -32    
-64    16     
112    112    
96     80     
-224   -16    
-112   64     
-640   -192   
-32    -96    
32     -192   
-48    32     
128    48     
-224   128    
144    32     
-48    112    
64     112    
-96    16     
288    192    
-416   -80    
224    16     
-384   16     
256    16     
-192   80     
128    80     
-1344  -96    
48     80     
224    80     
-352   -16    
-32    -16    
-192   -80    
224    -48    
64     112    
-48    80     
-128   16     
112    -48    
-32    256    
416    528    
-240   160    
-304   304    
-720   -144   
-224   16     
-32    -160   
144    48     
48     -224   
176    -144   
-96    80     
352    80     
-80    288    
144    -16    
32     48     
224    0      
-304   -192   
-64    -64    
224    240    
-384   96     
-64    176    
-64    336    
32     608    
-16    208    
-224   -224   
48     -64    
-144   -64    
160    144    
-16    80     
-80    -80    
-128   -160   
304    -304   
-352   272    
432    160    
-224   -64    
112    112    
-992   -64    
144    0      
-272   -224   
192    368    
-16    640    
432    400    
-672   -896   
144    272    
-96    112    
-112   -192   
0      0      
-32    112    
-192   -32    
-144   -864   
240    -176   
-144   -64    
-160   0      
-80    -528   
448    48     
-48    576    
-16    112    
48     -240   
-16    -16    
224    224    
80     704    
-224   608    
432    656    
-112   480    
-96    224    
-64    -96    
112    -64    
96     144    
-32    32     
160    144    
32     80     
-208   -176   
-112   -352   
64     -448   
128    -64    
128    96     
-112   192    
-272   -144   
0      80     
16     0      
-208   96     
48     32     
-48    80     
384    256    
-368   48     
128    112    
-48    -64    
96     96     
-176   64     
-112   160    
288    288    
-400   144    
-144   -32    
304    64     
-144   -64    
176    144    
-208   64     
176    32     
128    48     
-64    -48    
128    112    
-64    -144   
-160   48     
-64    80     
-160   64     
-48    -64    
64     16     
16     32     
96     96     
-208   32     
80     32     
16     -96    
-80    32     
112    128    
-80    64     
80     -16    
-176   32     
256    160    
-192   -32    
208    128    
-16    32     
48     64     
-208   -192   
272    96     
-96    -32    
-160   0      
48     48     
-16    80     
144    160    
-48    -128   
-48    192    
432    432    
-512   32     
176    48     
-192   96     
-112   -112   
64     -16    
-80    -80    
144    112    
80     192    
96     -16    
-32    80     
208    128    
-16    32     
48     80     
96     176    
112    144    
-48    64     
112    80     
-16    144    
-64    80     
192    208    
-256   -48    
144    160    
144    80     
-48    -240   
32     48     
32     -48    
64     -16    
64     176    
144    112    
-64    80     
80     96     
16     32     
16     80     
48     16     
80     176    
48     80     
-16    -416   
144    -48    
-16    -2144  
80     128    
176    144    
-176   96     
224    64     
-144   112    
112    160    
64     112    
64     240    
-48    176    
336    192    
-400   224    
272    272    
-256   -160   
128    176    
0      -272   
32     112    
144    48     
-48    -32    
16     32     
-16    80     
288    224    
-48    240    
-32    32     
48     80     
48     48     
-32    96     
16     -32    
-16    -80    
112    48     
96     80     
144    48     
16     -944   
160    176    
-192   32     
80     0      
32     160    
160    128    
-112   -96    
160    160    
-144   0      
-32    -112   
-64    80     
80     -48    
-16    48     
48     -128   
-128   -368   
-80    -960   
208    192    
-96    -848   
48     80     
80     192    
256    0      
-96    64     
176    48     
-160   -32    
64     -112   
160    32     
64     -112   
-128   48     
352    96     
-352   144    
96     -240   
48     80     
112    16     
352    400    
-416   112    
96     0      
144    128    
-160   16     
-16    -240   
128    112    
48     64     
-64    -160   
80     48     
-16    -208   
-80    112    
144    80     
32     128    
-240   -32    
192    160    
-48    0      
80     112    
48     160    
64     -32    
208    80     
48     -304   
80     128    
-208   -112   
192    112    
-160   -192   
288    0      
-48    -16    
64     128    
-160   -304   
-112   -48    
272    192    
288    160    
-96    240    
176    96     
-48    -1040  
-64    -128   
160    -80    
-48    96     
-48    48     
-128   16     
-64    -32    
112    -160   
144    112    
48     -192   
-112   -1088  
0      64     
128    -432   
128    96     
-736   96     
96     -384   
288    -48    
-64    -560   
160    -192   
96     -144   
16     32     
32     80     
144    80     
0      80     
-16    -192   
0      -256   
128    -48    
-48    -128   
208    -448   
-240   -80    
-48    -432   
-16    -624   
384    144    
96     -176   
0      -1664  
256    -64    
64     144    
272    0      
-192   -144   
112    192    
-80    -144   
-160   0      
160    -160   
-32    32     
-192   -176   
-48    48     
288    -224   
-112   -16    
336    -96    
192    720    
-192   0      
64     -800   
336    -144   
-304   -48    
64     112    
240    -80    
-96    32     
80     48     
64     32     
-128   -16    
32     -192   
-80    -64    
64     0      
32     48     
272    64     
-160   -144   
128    -416   
384    240    
64     -208   
-16    32     
80     -16    
112    -112   
-144   -128   
80     -64    
-240   208    
0      32     
-336   -80    
-16    48     
288    -64    
48     112    
-240   -48    
-144   -400   
-16    -64    
80     80     
48     96     
-32    -32    
64     -16    
-144   -160   
0      -48    
-128   16     
48     96     
-16    0      
96     -16    
-64    -16    
-80    -208   
80     -16    
-48    -128   
64     -384   
-240   -656   
368    -160   
-192   -416   
176    -176   
-48    48     
80     16     
64     32     
16     -16    
-128   -48    
256    48     
-256   -32    
160    16     
-272   160    
160    -96    
16     112    
-32    -768   
48     80     
-48    48     
-224   -496   
-256   -480   
32     -112   
-480   48     
112    -112   
-272   16     
112    -144   
-64    16     
144    -16    
80     -32    
-208   -192   
272    496    
-240   -96    
-368   -528   
160    -144   
-16    160    
-96    64     
-16    -288   
-256   -480   
320    16     
-192   -192   
432    -112   
-112   224    
400    0      
0      160    
144    -160   
0      64     
128    192    
208    -224   
-80    608    
-1136  0      
-352   -208   
-80    -352   
256    -400   
96     512    
144    288    
64     -80    
-144   256    
-640   -160   
-112   -192   
-480   -576   
112    -80    
-16    176    
-272   176    
-80    64     
-64    144    
-144   -48    
-544   -112   
176    224    
16     -32    
-160   -96    
16     -144   
-128   96     
-80    -48    
176    64     
80     -64    
80     288    
208    240    
-288   64     
64     -80    
-192   -16    
-128   -64    
96     16     
-336   0      
-208   16     
-192   -48    
320    272    
-80    96     
-32    -112   
64     144    
-160   -144   
-432   80     
272    -32    
-176   -16    
48     64     
-208   0      
16     16     
-288   0      
16     48     
-336   32     
-192   64     
16     144    
-80    64     
144    -176   
-112   80     
160    -32    
48     80     
-256   32     
144    64     
16     32     
-16    0      
-176   -16    
-80    -16    
64     96     
-192   -16    
-64    32     
-640   -48    
96     80     
-112   -112   
48     16     
64     -160   
32     256    
192    -16    
-64    32     
-16    80     
-112   -48    
96     -32    
368    432    
-320   176    
32     16     
-80    -48    
128    -96    
128    144    
-160   0      
176    96     
-48    112    
-48    80     
112    144    
-320   -160   
-16    64     
64     96     
-80    16     
0      64     
-48    32     
-48    -48    
0      96     
-288   -32    
-80    32     
-1152  128    
80     48     
-48    0      
32     176    
144    0      
-112   -80    
32     32     
96     160    
-96    80     
-32    96     
-256   -80    
240    112    
-112   -48    
-64    -16    
112    32     
-272   -32    
32     32     
-160   -208   
192    80     
160    112    
-80    96     
128    96     
-32    16     
304    144    
-288   128    
64     64     
-112   16     
144    64     
-32    -80    
16     208    
-336   -144   
272    384    
-240   32     
64     224    
80     16     
-64    128    
16     48     
-32    80     
-64    -176   
112    16     
112    64     
-272   -80    
208    240    
-176   0      
-48    160    
208    80     
-80    160    
0      48     
-48    144    
-32    -304   
-128   80     
272    80     
-432   -64    
112    144    
224    128    
-208   16     
16     -32    
-48    160    
-160   -16    
144    128    
160    32     
0      -16    
-240   -48    
304    -32    
-160   64     
320    240    
-80    208    
-64    96     
32     64     
-96    -32    
288    64     
-224   224    
-128   -16    
80     -16    
-64    96     
48     32     
-224   -16    
160    48     
32     112    
16     112    
416    400    
-480   176    
48     -80    
64     0      
-32    48     
96     16     
-112   -48    
288    144    
-96    32     
32     64     
64     16     
288    320    
-224   112    
144    96     
-64    0      
144    16     
0      96     
-80    32     
192    64     
16     96     
16     -32    
-128   -16    
96     112    
16     96     
16     0      
96     32     
48     80     
160    48     
48     112    
96     16     
-16    64     
560    480    
-400   368    
64     96     
-272   -112   
144    32     
144    -64    
-48    256    
16     304    
-160   208    
144    32     
48     80     
304    176    
-592   -352   
256    -560   
192    0      
288    352    
-48    144    
80     64     
0      16     
32     -32    
-64    -272   
128    -64    
176    240    
-192   -1200  
16     -112   
176    -32    
80     144    
48     256    
-96    0      
160    32     
0      688    
240    336    
-336   160    
0      -208   
96     64     
-32    32     
-16    32     
-96    224    
0      -1360  
320    256    
64     96     
160    208    
80     -272   
64     -224   
96     96     
64     32     
-32    96     
112    224    
-192   -16    
-64    64     
128    80     
-112   -112   
128    48     
144    144    
-16    112    
144    -656   
144    304    
-304   144    
224    -768   
128    448    
96     224    
144    -48    
-48    80     
96     -112   
16     240    
80     176    
304    -208   
64     608    
160    80     
-112   -144   
160    -640   
-96    192    
112    -624   
160    -272   
-80    80     
-128   -400   
16     -432   
128    240    
-304   -48    
208    -320   
80     304    
-32    32     
96     0      
-16    80     
144    32     
-112   -608   
112    96     
-160   -576   
160    208    
80     -176   
-64    -464   
112    -16    
176    144    
-144   -64    
112    96     
144    112    
0      112    
16     48     
48     -208   
160    96     
-112   -128   
112    80     
80     -96    
80     96     
16     48     
-64    432    
192    400    
-48    240    
-48    -96    
0      -128   
224    80     
-64    -304   
208    144    
-80    -144   
0      176    
80     -512   
64     -48    
128    -336   
-176   -96    
80     -416   
0      48     
16     192    
16     16     
112    48     
96     -192   
128    96     
-32    -208   
112    0      
-96    -256   
352    192    
-48    128    
96     48     
-80    0      
240    96     
-32    48     
128    -272   
16     -208   
-720   -432   
560    -512   
-224   752    
32     -1408  
-80    208    
48     144    
-48    -96    
128    16     
-48    -128   
80     -944   
-128   -112   
272    -192   
96     64     
80     -16    
-80    32     
-1392  0      
64     -96    
-64    0      
144    -112   
96     144    
-256   -1968  
32     -848   
768    208    
-384   944    
16     -288   
368    -256   
-240   560    
-96    -576   
96     -176   
-128   -304   
-896   -1024  
400    256    
-64    272    
0      -96    
112    -32    
224    80     
32     -112   
-64    -624   
112    64     
0      -176   
-96    -480   
208    -192   
-160   48     
-240   -544   
-32    -304   
-96    -304   
80     -96    
0      224    
304    352    
48     224    
272    176    
-80    144    
304    560    
304    192    
-144   -368   
224    -48    
64     -112   
176    144    
-208   -64    
368    144    
-832   -256   
272    80     
-736   32     
-96    -192   
96     -80    
96     0      
144    16     
-112   -352   
80     160    
-16    -2832  
160    512    
352    -224   
80     96     
208    48     
-144   -64    
16     -80    
80     -112   
-336   -80    
192    160    
-720   -112   
240    80     
144    -112   
-32    -240   
240    128    
-112   -240   
-16    112    
240    16     
-16    -176   
-32    96     
0      -208   
256    96     
-272   -32    
-32    32     
80     -80    
-992   -48    
64     -192   
0      -112   
112    -368   
176    80     
112    -144   
80     48     
-224   -336   
480    16     
-160   64     
-64    64     
-416   -64    
160    64     
16     -80    
-16    48     
-528   -144   
16     -80    
112    -32    
176    -112   
96     96     
16     -240   
144    80     
-240   0      
48     48     
-112   48     
-128   -16    
-48    -48    
-192   -48    
-208   -48    
16     80     
80     64     
-80    64     
368    224    
-224   -144   
-32    144    
192    -192   
176    48     
-48    -16    
176    48     
-32    32     
144    -32    
-160   -16    
128    -48    
224    192    
-144   16     
-80    64     
144    -160   
-80    16     
-128   -272   
144    96     
-320   -16    
-64    -16    
-80    -16    
-608   0      
-144   -32    
-272   208    
-400   16     
144    -16    
-176   80     
112    -80    
-224   -32    
-192   -208   
0      80     
64     -80    
64     32     
-80    -176   
-336   48     
352    -48    
-464   32     
-32    -80    
-176   320    
-352   288    
0      224    
32     -64    
-64    -80    
64     -32    
-80    -64    
144    32     
16     48     
-64    128    
64     64     
-256   64     
240    64     
-272   -128   
288    224    
-544   -16    
160    272    
-352   -80    
-160   64     
80     -64    
-16    96     
176    192    
-112   336    
-144   -224   
128    176    
-32    16     
96     176    
32     -16    
-32    32     
32     32     
-64    0      
-80    -16    
-208   -16    
32     128    
-208   -176   
-64    -112   
-16    -112   
256    64     
-256   -256   
144    32     
-64    -96    
192    48     
-48    16     
-96    16     
64     112    
-128   160    
208    144    
-192   96     
224    224    
-640   -16    
-112   32     
176    -96    
0      48     
112    160    
-32    0      
64     80     
128    80     
-96    48     
-144   -32    
176    80     
-64    80     
272    128    
-160   80     
-160   -160   
-448   -256   
304    128    
0      80     
-48    112    
-16    16     
-48    0      
0      -48    
-96    32     
-16    -16    
-272   32     
144    80     
-224   -48    
48     -224   
64     496    
-176   256    
-368   -80    
112    480    
-560   320    
-160   240    
-256   -112   
-48    -288   
144    -80    
-64    80     
48     48     
32     128    
112    144    
-64    128    
-96    160    
-16    32     
0      160    
-128   -64    
144    432    
-720   480    
160    64     
32     -32    
208    144    
-160   192    
-32    80     
160    304    
-288   496    
-16    320    
-32    192    
-176   416    
-160   224    
-48    176    
-96    -224   
128    64     
-96    -256   
-336   -288   
48     64     
96     112    
-208   160    
-32    32     
0      48     
192    96     
-288   0      
144    -128   
0      96     
144    -48    
0      64     
-16    32     
-176   160    
80     48     
-48    64     
192    416    
-128   -16    
496    -96    
-48    1056   
112    544    
-256   -576   
256    496    
-144   208    
-32    -160   
-64    80     
96     0      
160    144    
0      -32    
32     176    
-80    128    
96     -48    
16     -96    
-80    288    
96     -144   
32     208    
-80    64     
240    80     
-160   -64    
128    96     
160    96     
-96    80     
-240   112    
240    80     
-64    16     
-112   -16    
48     -48    
80     48     
-112   48     
-80    112    
192    592    
32     -48    
-112   -64    
-160   -320   
-16    128    
48     304    
-32    32     
464    496    
-464   192    
48     -208   
-208   -624   
-96    -640   
128    -128   
32     -112   
0      -352   
32     -128   
16     272    
48     384    
176    416    
-48    256    
160    352    
160    144    
-64    192    
-32    48     
192    320    
-16    16     
-80    64     
240    160    
-96    16     
48     16     
48     48     
80     96     
48     96     
16     16     
64     80     
-80    -208   
208    -368   
-368   64     
256    -288   
-144   0      
432    304    
-128   560    
-160   -64    
32     -64    
16     -32    
-96    -176   
64     256    
160    624    
80     -128   
-96    48     
112    -16    
16     -272   
-64    80     
192    -720   
-32    32     
64     144    
-32    32     
96     -144   
80     16     
0      -304   
64     64     
144    128    
272    128    
-16    528    
112    112    
32     16     
-80    -144   
176    -96    
-288   -464   
432    672    
272    512    
-464   -192   
224    -224   
48     240    
-96    128    
304    0      
-96    112    
128    288    
-48    -16    
464    576    
-416   -464   
80     -224   
96     288    
96     -544   
112    128    
96     -416   
144    240    
-80    -80    
32     -64    
96     176    
16     240    
-192   -464   
-16    -384   
144    -80    
-16    -224   
-80    0      
0      -128   
0      160    
-112   -224   
-48    -32    
32     -176   
-64    -16    
32     -368   
112    128    
80     96     
128    112    
32     176    
160    192    
0      112    
-272   -384   
464    112    
-96    176    
-32    -144   
0      -208   
192    -16    
-48    -208   
16     64     
80     -336   
32     48     
144    304    
-32    16     
128    -80    
-16    256    
80     240    
-176   -176   
128    32     
16     -240   
0      96     
-64    -320   
32     16     
320    -192   
-80    -32    
128    -176   
96     80     
-96    -80    
160    32     
16     -48    
-32    96     
-144   32     
0      -224   
64     64     
112    -48    
-80    160    
64     -192   
16     176    
112    -48    
-128   -64    
128    -448   
32     80     
0      32     
32     64     
16     -32    
80     -80    
96     -80    
0      -16    
-64    -1152  
304    0      
-176   96     
448    48     
80     96     
-176   -224   
208    96     
288    -256   
-96    -912   
256    16     
48     -336   
-128   0      
-368   -16    
0      -416   
80     48     
160    -400   
-64    -80    
48     -1680  
240    -240   
240    112    
-16    -144   
-32    224    
160    0      
112    -288   
16     32     
16     -192   
-128   -176   
-784   -112   
80     -80    
288    48     
-208   48     
144    0      
208    -416   
-112   -256   
-96    -112   
-16    -96    
-80    -320   
112    80     
80     -128   
-64    80     
-112   -144   
288    -144   
-272   -112   
112    -160   
144    48     
80     -144   
80     -80    
-16    -384   
-16    -48    
-16    -656   
128    80     
96     -80    
-48    112    
288    272    
-272   32     
-240   -16    
208    48     
-128   -48    
-32    48     
-1664  -80    
-16    -224   
16     -80    
64     -128   
16     -192   
96     80     
0      -32    
0      -1232  
-96    -96    
160    -32    
80     176    
-192   96     
160    64     
-272   -16    
144    -64    
-304   -96    
32     16     
-528   -16    
96     0      
-128   -48    
416    -352   
-256   128    
160    -304   
208    128    
-384   64     
128    -16    
-32    0      
64     -48    
32     32     
32     -16    
48     112    
96     16     
-464   0      
32     -160   
-144   -192   
224    -336   
48     80     
80     -496   
-32    80     
128    80     
80     -288   
-128   0      
0      -240   
-272   16     
64     -48    
-224   48     
80     -96    
-208   16     
48     -352   
-48    -32    
176    -160   
144    224    
16     -384   
-176   128    
-48    32     
144    -16    
-192   64     
64     16     
-64    80     
96     192    
-304   128    
80     208    
-208   -128   
-112   -128   
160    128    
-144   -80    
-16    -128   
256    -736   
-16    0      
0      272    
64     48     
144    224    
32     -128   
160    -96    
-16    -96    
-112   128    
0      -128   
-160   160    
272    160    
-80    208    
208    -592   
16     -96    
-544   -160   
-1072  -640   
-48    160    
144    144    
-240   0      
176    64     
-176   144    
-64    -96    
-128   0      
128    48     
-192   -176   
-336   -336   
208    224    
-1088  -832   
256    448    
-384   112    
16     -544   
256    480    
-128   160    
80     16     
-240   -16    
208    -320   
112    16     
48     112    
240    32     
-192   -80    
-464   -128   
48     32     
-64    -336   
320    336    
-64    272    
-128   -64    
-16    208    
-144   -144   
0      16     
0      96     
-48    816    
-304   -176   
-384   -464   
192    224    
-96    304    
-48    -32    
-64    -208   
48     -16    
224    16     
-16    32     
-32    -64    
-336   -64    
-128   -80    
144    192    
-256   32     
-288   144    
-192   -384   
32     256    
-544   48     
-160   -352   
-384   -1152  
-208   -336   
48     -400   
-16    560    
-176   336    
-288   -496   
240    352    
-64    160    
-176   -240   
16     224    
16     48     
160    48     
0      432    
-768   -480   
208    -448   
288    704    
-160   400    
128    -400   
-176   16     
208    0      
-304   -304   
560    -96    
-176   832    
-224   -32    
-240   -784   
160    528    
144    208    
-336   80     
-144   -528   
-224   64     
208    -16    
48     -16    
0      112    
-64    -96    
464    96     
-480   64     
256    64     
0      -32    
-16    96     
-64    0      
16     240    
-272   -80    
-96    -208   
-368   -208   
96     560    
64     64     
-64    -400   
64     32     
16     -16    
-80    -128   
160    160    
16     496    
-288   -464   
144    -144   
240    592    
-224   544    
32     -400   
64     32     
-224   128    
176    -240   
16     704    
-256   -448   
-64    -656   
-160   -400   
352    912    
288    1344   
-160   -288   
-112   -704   
240    -128   
-304   96     
128    16     
-224   48     
192    64     
-192   80     
32     96     
-352   -144   
-80    48     
48     80     
-16    48     
-16    32     
208    -64    
-352   -32    
256    352    
-144   -32    
-96    -272   
-32    192    
-112   48     
128    208    
0      0      
-128   128    
-80    -336   
48     96     
16     160    
352    272    
-16    528    
-144   -112   
80     0      
48     32     
240    0      
-208   -112   
256    80     
96     368    
176    128    
-80    16     
64     192    
144    448    
-32    0      
-48    0      
-64    -80    
16     -144   
240    208    
-208   384    
-16    560    
80     176    
16     400    
112    64     
-224   0      
144    32     
-112   224    
-32    288    
-96    224    
-48    192    
160    80     
96     496    
160    256    
48     160    
-32    96     
-16    -16    
96     128    
-240   48     
-32    144    
64     -16    
-128   64     
-32    128    
-32    96     
-64    80     
-48    80     
-80    -48    
128    32     
-32    80     
-16    64     
-16    16     
96     128    
192    144    
-144   -160   
80     112    
0      32     
112    112    
16     96     
-80    -16    
16     -64    
-32    128    
0      112    
-272   -272   
192    160    
64     48     
16     48     
112    80     
16     64     
80     160    
64     48     
-64    16     
192    -976   
-96    160    
48     -16    
-48    80     
64     48     
112    32     
16     32     
-112   -32    
-96    32     
-16    -96    
-16    -32    
720    800    
-688   224    
144    272    
-208   -112   
-352   -640   
0      16     
-128   -2112  
16     256    
80     32     
48     -160   
16     96     
0      48     
224    48     
224    32     
32     32     
144    160    
0      80     
-16    224    
-128   160    
16     -32    
32     96     
176    80     
112    192    
-96    144    
64     80     
-32    32     
64     96     
272    -112   
-144   -64    
240    32     
112    16     
64     -48    
-96    -144   
32     128    
240    64     
-32    160    
32     -288   
48     224    
80     -2384  
0      32     
144    80     
224    80     
-224   -80    
112    32     
-64    -64    
400    288    
-320   -16    
48     -16    
272    0      
384    48     
-384   64     
176    -352   
48     128    
80     -240   
-64    32     
-16    -48    
224    128    
-32    208    
32     208    
-176   -16    
192    176    
64     112    
16     -16    
48     112    
48     64     
304    224    
-240   96     
144    144    
-112   -320   
32     64     
128    -1072  
-32    80     
192    64     
16     80     
128    48     
208    160    
-112   48     
256    -32    
-144   -176   
192    -144   
96     240    
160    -272   
-48    32     
80     -96    
64     48     
0      -224   
128    128    
0      64     
16     16     
-16    -112   
-48    -48    
96     160    
16     -48    
32     112    
48     -16    
32     48     
96     -368   
304    288    
-112   224    
96     112    
0      -1488  
256    128    
16     64     
-112   80     
16     -64    
80     80     
208    192    
-48    -272   
48     64     
112    16     
112    304    
16     -64    
-16    80     
64     -112   
-32    -80    
128    -448   
0      -1392  
-80    -48    
160    -368   
16     112    
-528   176    
320    240    
-224   352    
112    368    
192    64     
80     128    
112    -192   
144    128    
-80    -96    
80     -1024  
-64    -160   
48     -1200  
96     64     
64     -352   
-32    96     
-576   32     
288    112    
32     96     
256    400    
160    624    
128    -240   
-48    -336   
64     128    
96     -144   
0      144    
144    144    
-96    -352   
-32    -128   
112    192    
272    32     
-320   -592   
208    272    
-144   -32    
112    -48    
176    80     
80     -160   
-128   -704   
32     384    
48     -144   
-16    224    
0      208    
96     -240   
48     80     
-112   -64    
32     48     
-416   -64    
304    48     
-576   208    
-32    -368   
80     -96    
144    -288   
64     48     
16     -112   
-112   304    
288    32     
-368   -176   
64     -528   
-464   -640   
-112   48     
160    432    
-368   304    
-96    -48    
-432   -304   
-128   -336   
688    0      
16     672    
128    -112   
144    -768   
96     144    
192    416    
-48    128    
96     48     
176    64     
-48    432    
240    176    
80     -176   
64     0      
-112   80     
-224   -144   
-272   -480   
-160   64     
192    16     
-32    -512   
-80    96     
144    -496   
-208   -48    
160    -208   
-256   112    
-112   32     
272    96     
-64    224    
32     176    
-656   -32    
240    64     
-368   240    
144    -80    
-16    -112   
464    -112   
-512   -672   
112    -704   
256    272    
48     176    
176    32     
-160   -64    
112    32     
-32    -128   
112    336    
-80    96     
-32    128    
-496   -32    
336    -48    
144    208    
-16    -336   
848    336    
-32    480    
176    208    
64     -448   
-48    -528   
304    -16    
-128   544    
128    -432   
240    -16    
-288   144    
368    -144   
-336   32     
752    64     
-400   320    
736    576    
-544   0      
336    -576   
0      -48    
-320   48     
-160   -528   
128    -416   
80     176    
-224   192    
512    240    
-272   -96    
288    -112   
-224   80     
208    80     
-176   128    
-880   -288   
-16    480    
-432   -720   
-352   160    
-240   -176   
96     208    
-32    304    
240    144    
-96    160    
96     176    
-192   160    
64     -96    
192    96     
-592   -432   
336    576    
-320   -176   
176    -32    
-32    -32    
-80    144    
0      112    
-336   -16    
224    496    
-416   368    
-80    -400   
-544   0      
16     480    
32     -32    
-96    0      
-16    -16    
112    320    
-64    -192   
128    96     
-336   64     
80     80     
-112   0      
-80    -32    
16     -32    
-80    64     
96     48     
-688   -96    
192    -160   
-160   -320   
176    -96    
-160   -208   
-48    -368   
-64    -320   
96     -48    
-96    32     
208    144    
-224   80     
64     144    
96     -16    
-80    -144   
560    320    
-464   320    
-192   0      
-480   16     
176    32     
-112   -16    
64     -32    
96     -96    
-160   32     
-16    16     
-16    -160   
-32    64     
80     80     
16     144    
32     16     
-240   176    
0      80     
-80    0      
-224   48     
128    80     
-48    -48    
-48    208    
160    48     
-208   32     
112    64     
-208   0      
160    16     
-288   -112   
432    80     
-304   32     
464    240    
-368   32     
-128   -48    
-80    -112   
112    16     
-832   -288   
16     -48    
-16    0      
-16    -272   
32     -144   
-96    176    
-208   208    
0      64     
-32    96     
0      0      
-48    64     
-128   48     
160    112    
-336   -80    
64     16     
96     144    
-160   0      
-16    0      
144    192    
-16    -32    
-144   0      
0      160    
32     -80    
48     0      
112    48     
80     -96    
-160   -96    
336    272    
-224   96     
112    176    
-176   -112   
208    112    
-128   336    
32     64     
32     64     
-112   48     
-208   -32    
-64    -176   
256    128    
-224   192    
-80    128    
-400   -48    
144    -112   
0      -80    
16     112    
-80    -160   
-320   -32    
256    48     
-176   -176   
144    -160   
16     -96    
0      -112   
-32    -16    
-64    128    
-80    -96    
384    256    
-144   256    
96     528    
-32    288    
-112   112    
-176   -128   
-224   192    
336    816    
-320   336    
272    448    
-416   240    
-496   448    
64     144    
-368   -80    
64     96     
80     96     
48     48     
-208   80     
80     -96    
-16    160    
240    80     
-80    48     
112    144    
-144   -48    
-64    48     
128    80     
-208   144    
-48    96     
-304   0      
224    128    
192    192    
-288   128    
-128   96     
-128   0      
-32    80     
-112   -192   
112    80     
176    224    
-288   128    
0      240    
208    16     
-32    64     
64     96     
48     96     
-144   -16    
144    128    
-32    0      
96     96     
-48    -16    
-64    -96    
64     48     
-64    96     
-128   48     
-48    -80    
48     144    
256    128    
-192   64     
16     16     
96     160    
-16    32     
-80    32     
-32    -48    
176    80     
80     64     
48     80     
16     144    
96     32     
-32    128    
96     256    
-128   -16    
0      0      
128    112    
-16    48     
48     80     
0      -48    
112    -80    
-96    -320   
96     -256   
32     208    
64     -1328  
16     368    
32     224    
144    496    
96     96     
-16    -112   
128    -80    
192    0      
-64    16     
256    96     
-32    32     
96     96     
-80    16     
0      -128   
-144   32     
208    -624   
144    64     
368    320    
-384   16     
384    32     
-224   -160   
160    448    
-16    144    
112    128    
0      -32    
-48    -144   
-16    -224   
80     16     
-32    144    
112    -80    
96     -112   
48     576    
-16    -240   
192    256    
-304   -16    
256    -32    
-32    144    
112    128    
-256   -544   
384    64     
-208   192    
16     -16    
192    64     
96     80     
-144   32     
160    -656   
80     384    
32     -400   
-144   16     
-64    -944   
-64    -960   
32     -32    
128    416    
-48    32     
144    240    
96     64     
0      32     
64     128    
144    48     
32     64     
16     -80    
32     64     
112    -400   
-16    80     
160    80     
32     80     
-208   -224   
144    -240   
128    -64    
144    96     
-48    0      
-16    -192   
224    64     
0      -128   
-240   -352   
48     -416   
32     112    
416    240    
-64    768    
16     656    
528    496    
80     16     
-32    16     
64     0      
80     -80    
-128   -48    
192    -96    
-128   240    
304    144    
64     192    
384    128    
-176   352    
-144   -304   
-32    32     
736    -592   
-128   416    
-32    224    
64     0      
-96    -32    
144    80     
304    560    
176    80     
272    464    
-224   -48    
128    96     
-304   -240   
32     -144   
80     368    
-32    544    
64     240    
-112   48     
-112   32     
-48    -32    
-192   -368   
192    -448   
-192   -880   
256    336    
-112   -1568  
208    96     
-384   -288   
-16    -592   
-16    176    
-32    -16    
64     48     
112    -16    
224    -1376  
-144   160    
-176   -416   
-288   128    
-1136  624    
128    -192   
48     -64    
64     -272   
16     -32    
160    -832   
496    384    
-208   288    
320    128    
-96    112    
160    -640   
224    -192   
272    288    
-64    160    
144    -320   
-48    -176   
144    -304   
256    368    
-224   -384   
160    -608   
96     224    
-80    320    
240    -1568  
-160   -128   
80     -80    
304    -192   
144    -80    
128    -64    
-240   -128   
336    -288   
-560   -352   
96     -384   
192    -384   
64     -416   
128    80     
-336   -208   
-176   -256   
96     -864   
32     144    
368    -64    
64     144    
64     48     
48     224    
368    336    
-320   208    
-80    176    
176    48     
-128   192    
-64    -48    
16     80     
-64    16     
-48    240    
-16    -496   
128    -48    
208    128    
-128   -80    
-80    -256   
208    -160   
-96    -160   
208    -256   
-144   64     
208    -64    
-256   16     
96     16     
112    -48    
-48    -80    
192    304    
-16    -160   
0      -96    
144    -1312  
48     64     
32     160    
160    128    
-80    128    
112    32     
-16    16     
64     -16    
-848   -48    
160    -272   
-496   0      
256    -80    
-48    -96    
352    -320   
-144   256    
96     -112   
-64    0      
-64    -112   
128    80     
112    208    
-368   16     
112    0      
64     32     
-176   -64    
256    0      
-64    16     
96     128    
-16    32     
32     -240   
80     336    
208    -176   
-16    48     
0      64     
-32    -128   
128    0      
128    -192   
-224   -80    
128    80     
-160   48     
32     -48    
48     64     
-32    -112   
32     32     
112    -64    
96     96     
32     -208   
96     -16    
-144   -112   
16     -48    
-208   48     
256    64     
-256   32     
64     0      
-176   -32    
128    -96    
-240   -128   
304    -128   
48     208    
48     -16    
-16    -32    
-112   -256   
-368   -64    
-48    32     
-496   -112   
0      -128   
-256   160    
208    704    
64     160    
-304   -480   
80     -368   
-32    32     
-160   64     
224    -16    
-176   32     
16     16     
-64    48     
-160   80     
112    176    
-288   -48    
-64    96     
-560   -48    
-32    96     
144    -64    
-96    32     
208    -32    
-16    64     
80     -32    
32     16     
-304   -256   
352    208    
-160   96     
32     -128   
16     -112   
-96    -144   
-208   -208   
-288   -208   
16     128    
-576   -48    
384    304    
-480   -128   
48     0      
112    -16    
64     32     
-32    -96    
-32    96     
128    16     
-128   -80    
176    64     
64     160    
-528   240    
32     -80    
-272   -16    
144    32     
-80    96     
176    16     
128    192    
-48    -128   
128    64     
48     -144   
80     -64    
-96    128    
-16    -32    
-48    48     
-160   -64    
272    48     
16     96     
-160   32     
64     -336   
-416   240    
-32    -192   
-304   160    
112    0      
-144   -64    
80     48     
32     176    
-128   -112   
-192   64     
336    -64    
-112   -16    
176    160    
16     16     
-48    224    
-16    -16    
48     48     
-160   -16    
48     80     
-288   -96    
304    208    
-64    176    
-16    80     
32     64     
80     64     
112    48     
112    -32    
-160   176    
-64    80     
-192   80     
80     0      
160    48     
-256   0      
192    64     
-976   -16    
32     64     
224    128    
-176   112    
-32    160    
-80    48     
16     80     
-48    -16    
16     32     
368    416    
-176   208    
144    128    
144    384    
16     240    
-208   272    
-128   32     
-240   16     
0      16     
128    80     
48     32     
16     16     
-112   96     
112    128    
-64    96     
-176   -512   
-96    -48    
-208   -432   
-160   -128   
-48    160    
-16    272    
80     112    
16     -192   
-16    48     
208    560    
-256   144    
32     -320   
160    80     
32     304    
80     704    
-224   -464   
144    112    
-112   112    
144    48     
-224   0      
112    112    
288    128    
-192   -16    
128    64     
-96    32     
64     96     
-32    80     
320    208    
-416   -336   
208    160    
-96    -32    
16     -464   
80     464    
0      112    
-64    32     
-80    256    
-128   -48    
48     -320   
48     -112   
-48    -16    
16     80     
-64    -272   
-48    -16    
32     -144   
-96    112    
80     16     
-16    144    
-32    -16    
176    -128   
-80    96     
112    80     
-16    176    
144    96     
-112   48     
112    -112   
80     16     
112    144    
-96    32     
176    176    
32     128    
160    -64    
256    480    
-320   480    
480    448    
320    480    
-112   256    
96     0      
48     80     
16     32     
-80    -32    
48     48     
-48    64     
-32    16     
144    64     
80     64     
32     32     
272    240    
-208   -16    
-176   96     
240    144    
-80    -96    
32     -64    
-96    80     
96     16     
64     -48    
160    16     
96     128    
32     176    
112    32     
-192   -352   
640    -304   
-112   480    
352    64     
240    -176   
48     -16    
-16    96     
32     96     
-96    176    
-240   48     
-160   -176   
-192   -160   
528    400    
-304   176    
-80    32     
208    -112   
-160   32     
-32    -32    
192    -128   
-112   688    
352    16     
-640   -1552  
-64    -1184  
240    496    
-144   560    
-160   160    
-80    -48    
96     -48    
192    0      
-96    -176   
-192   -464   
-304   -848   
432    -400   
-224   608    
16     -256   
16     128    
32     176    
240    -464   
432    624    
32     368    
128    560    
64     -128   
-352   -880   
400    -80    
-48    592    
176    240    
-208   -144   
48     -144   
128    48     
0      432    
368    224    
-432   -768   
-176   -208   
112    -720   
-48    -96    
112    48     
-96    240    
-192   80     
256    0      
-64    0      
448    304    
-224   256    
0      128    
32     160    
-32    -48    
128    -16    
48     -320   
64     -224   
160    -624   
16     80     
-16    32     
48     32     
-176   -224   
80     -32    
160    144    
80     112    
-80    -48    
208    -192   
64     144    
208    48     
-112   112    
128    96     
128    96     
-48    -336   
64     32     
112    -944   
-112   0      
48     -48    
368    224    
-160   32     
112    336    
320    80     
-48    -192   
176    112    
96     -624   
160    64     
-64    -144   
64     144    
-80    -192   
112    208    
-32    64     
-32    80     
80     64     
64     112    
-32    16     
128    80     
128    96     
-128   -368   
144    112    
48     -64    
-16    -32    
224    -16    
48     96     
144    -112   
0      96     
-80    144    
48     80     
160    128    
-96    32     
-16    32     
80     -400   
-16    112    
64     0      
-96    32     
304    -80    
-32    64     
112    -176   
-64    16     
64     -240   
16     240    
112    -64    
-16    -448   
128    16     
0      -64    
-64    -32    
-288   0      
144    -160   
32     -64    
128    -288   
112    32     
-96    -352   
176    -48    
96     112    
-48    16     
64     64     
16     -16    
224    -160   
0      176    
64     -224   
-128   -96    
-64    16     
64     -128   
-32    -16    
144    -624   
0      -80    
224    -1072  
-224   144    
16     96     
144    -80    
48     -80    
-48    -16    
144    -192   
64     96     
-144   -32    
128    -32    
-176   -64    
-48    -112   
0      -112   
192    -176   
-304   -352   
368    -624   
-64    128    
80     -2512  
-144   -96    
224    -256   
-192   96     
160    -16    
-96    80     
96     192    
-144   -64    
-496   16     
288    64     
-1744  48     
160    224    
160    240    
-80    -16    
160    -48    
-80    -400   
32     256    
256    -144   
-96    -160   
0      -208   
64     128    
16     -48    
64     -128   
-96    0      
112    -32    
-96    -16    
352    80     
48     -32    
96     16     
448    0      
0      -320   
288    32     
64     -1184  
96     160    
64     32     
32     -48    
-144   -32    
304    48     
-288   0      
176    16     
-592   0      
80     -192   
-3024  -272   
176    -336   
0      112    
144    -96    
-96    -256   
48     -96    
-16    112    
32     -64    
112    160    
-80    48     
-48    -64    
32     80     
160    112    
-160   -48    
48     -32    
224    400    
160    192    
-208   -112   
48     -272   
128    32     
-32    -768   
-16    -32    
208    112    
192    64     
-80    128    
0      -64    
-160   -32    
96     0      
-144   64     
16     -16    
64     80     
-176   -48    
224    -80    
48     -80    
112    208    
0      -288   
-144   112    
80     128    
0      -112   
-464   -304   
272    -80    
-288   -176   
128    64     
80     -32    
-192   -96    
-80    -80    
-16    -208   
-304   -464   
0      -496   
320    192    
-80    -16    
-496   480    
-352   128    
-80    0      
-16    -16    
112    64     
0      48     
48     224    
-304   48     
0      -96    
-448   80     
160    -96    
-144   -16    
-48    -32    
128    96     
-608   -208   
-160   -80    
48     16     
-560   -80    
-32    -96    
-800   -48    
128    -112   
288    112    
-112   -224   
192    -208   
-192   -368   
-176   -256   
144    -128   
-208   112    
64     512    
-352   -48    
-128   -144   
-48    -48    
-208   256    
96     -272   
-304   288    
-80    128    
-368   -48    
-48    -64    
176    320    
-128   -16    
-144   320    
-16    144    
-176   -368   
-80    176    
-144   64     
32     16     
-16    128    
-208   -176   
224    -208   
-176   304    
64     -80    
-48    48     
64     128    
64     -224   
80     -160   
-80    -144   
64     192    
-96    16     
16     64     
48     80     
-80    -16    
0      64     
-128   48     
-32    80     
-80    16     
-16    16     
-208   80     
-32    64     
-1216  288    
16     144    
-80    -112   
32     224    
160    -352   
-224   96     
-64    64     
-48    -64    
16     64     
-144   -32    
64     32     
32     144    
-64    16     
-176   -112   
-176   32     
-368   -224   
32     -144   
48     0      
144    128    
-96    48     
32     48     
-16    128    
-144   -80    
288    -64    
-160   192    
112    96     
-80    -144   
80     -48    
-144   -32    
0      96     
176    112    
0      64     
-368   -16    
-432   -912   
128    -560   
-32    240    
0      -80    
-240   -48    
208    48     
-176   112    
16     64     
-144   -16    
-32    32     
-96    -48    
144    160    
-96    -32    
16     96     
-288   -128   
-144   32     
112    80     
-32    80     
160    144    
0      496    
352    576    
-160   592    
48     -64    
-64    -112   
0      176    
-176   -48    
48     304    
-272   -160   
32     -240   
-1056  -1568  
48     -224   
528    1008   
-624   784    
128    -320   
-288   -384   
144    96     
-80    96     
224    400    
192    0      
-320   400    
-32    -224   
16     -144   
-192   80     
-80    80     
-32    -176   
-32    128    
320    624    
-208   -48    
-144   -16    
144    256    
-16    416    
208    304    
-96    128    
208    64     
-16    208    
-208   -16    
-48    -32    
128    -64    
80     128    
-112   -160   
96     624    
256    576    
-256   0      
80     16     
-144   -96    
64     -240   
96     -160   
16     -80    
-272   -176   
288    -16    
-224   48     
176    -144   
-416   32     
144    -32    
-208   32     
112    112    
176    192    
-240   -16    
112    432    
320    176    
-416   128    
656    -48    
-224   48     
80     32     
-48    144    
-48    -288   
144    304    
-240   -96    
64     64     
80     -16    
-224   96     
64     256    
-128   32     
32     48     
32     64     
-112   0      
96     128    
48     96     
-176   -112   
144    64     
0      32     
-224   48     
192    160    
160    96     
80     80     
-160   0      
192    32     
-16    80     
-160   0      
-64    -96    
256    144    
32     80     
80     64     
0      64     
16     48     
-32    48     
96     80     
0      80     
128    160    
-112   -80    
192    112    
0      112    
-64    64     
32     32     
80     144    
208    272    
-224   48     
96     80     
-128   -64    
0      112    
-144   -16    
16     -16    
96     144    
80     48     
-16    80     
96     80     
0      112    
-64    128    
128    176    
32     160    
-192   64     
64     32     
48     112    
112    -96    
16     112    
144    96     
-80    -192   
112    64     
-80    -1216  
-32    112    
208    80     
-64    112    
144    -16    
48     0      
256    -32    
-176   96     
176    16     
-64    160    
80     0      
160    96     
176    224    
-208   -208   
16     112    
288    -560   
-336   -16    
32     -176   
160    64     
112    112    
-224   -224   
32     80     
240    160    
-352   48     
288    256    
-256   -32    
224    144    
-144   16     
-48    16     
80     0      
128    16     
96     32     
-80    -304   
80     112    
-80    -272   
0      -32    
48     80     
208    64     
48     48     
-16    32     
-16    32     
48     -64    
16     32     
32     -32    
-80    48     
80     -128   
64     96     
32     32     
0      96     
96     -1088  
128    -144   
272    272    
-96    112    
-32    32     
16     96     
96     48     
96     -16    
-64    64     
48     -144   
144    80     
-176   -304   
160    32     
-16    -208   
96     64     
96     -544   
272    96     
-192   176    
48     160    
-64    240    
112    48     
96     96     
240    -496   
-48    96     
0      -176   
0      -48    
192    -192   
32     -16    
48     -112   
128    144    
-208   -176   
176    144    
-80    144    
144    112    
0      48     
32     -144   
272    336    
-192   0      
128    160    
-112   -32    
240    80     
48     16     
128    80     
64     -176   
48     80     
48     -512   
272    368    
-112   352    
0      -976   
-48    80     
-48    -272   
240    -848   
96     16     
-16    -160   
112    -128   
128    128    
-64    -208   
80     208    
128    -96    
16     -688   
-240   64     
512    -272   
160    -64    
320    32     
-192   -368   
288    16     
-176   192    
16     160    
96     -448   
-96    -144   
288    -1808  
-96    -32    
304    160    
-96    96     
160    48     
-64    -32    
176    -64    
80     224    
-64    192    
-128   64     
-304   -128   
640    -112   
208    32     
112    192    
-48    -96    
-16    -704   
224    -80    
48     -1056  
0      -272   
144    -160   
-208   80     
-80    112    
144    256    
48     304    
-176   48     
-384   0      
0      -176   
-304   -80    
-16    -352   
160    -672   
128    -192   
240    -32    
192    -176   
-48    16     
32     -176   
128    128    
160    16     
-48    112    
-144   176    
64     -320   
-96    -144   
0      -144   
-368   -160   
32     320    
-32    -272   
208    560    
80     96     
112    -240   
-272   16     
32     -96    
48     112    
64     16     
64     -80    
-64    -64    
288    112    
-288   160    
112    96     
-80    464    
-480   -352   
-64    -1136  
160    -400   
-160   416    
0      64     
96     -192   
32     -320   
-32    64     
48     -288   
96     -80    
-192   -192   
208    -48    
-80    448    
224    64     
-176   -112   
16     16     
-400   -48    
128    64     
144    128    
-16    -208   
-80    -256   
96     -480   
80     160    
-112   -64    
32     -112   
-48    -32    
160    80     
-64    -16    
96     -64    
-240   48     
-64    -192   
0      64     
80     -16    
32     48     
80     -112   
16     64     
64     -336   
-208   -64    
-48    -336   
-48    -320   
-192   -288   
16     -96    
-240   -32    
96     -16    
-80    -32    
144    -112   
-112   128    
80     192    
80     48     
-32    -160   
112    128    
-64    -272   
16     48     
0      32     
-16    64     
-48    64     
48     64     
-144   -96    
80     80     
-64    -48    
-64    -224   
-80    -560   
368    -96    
160    352    
-736   -16    
208    208    
-96    144    
-496   -352   
-64    -128   
-512   -288   
-544   -544   
336    80     
-96    176    
352    384    
-128   352    
144    -96    
-48    32     
-176   32     
16     32     
-240   -64    
208    64     
-64    128    
-160   592    
-64    416    
-576   -208   
-80    0      
48     80     
-96    16     
-16    592    
-736   16     
272    -672   
48     640    
-128   64     
0      -336   
-64    -16    
-96    240    
-32    112    
-112   -192   
176    160    
512    720    
-432   -128   
-96    -352   
32     -48    
-752   368    
96     64     
-80    -160   
-240   -240   
-16    -176   
-32    208    
32     16     
-272   -80    
224    320    
-112   384    
-160   144    
112    32     
-240   -48    
-64    -32    
96     160    
-160   176    
-16    160    
-880   176    
-240   224    
-32    -192   
64     32     
64     -32    
-16    304    
48     160    
-112   -16    
-128   -96    
0      32     
-432   48     
-32    -48    
272    96     
32     192    
-48    112    
-784   -32    
320    48     
-112   48     
224    112    
-240   48     
112    -80    
0      112    
32     0      
-80    -16    
80     32     
0      64     
160    176    
32     64     
-64    -32    
0      160    
-48    32     
-96    144    
32     -48    
64     80     
192    128    
-320   48     
96     32     
16     464    
384    -192   
0      256    
112    -32    
-304   -48    
192    192    
-32    112    
96     160    
-96    32     
32     48     
-240   32     
176    -112   
32     160    
64     0      
64     224    
-16    128    
-112   144    
-96    48     
-176   48     
-336   -176   
64     96     
-352   -128   
-48    -64    
-112   -48    
64     64     
-1360  -160   
32     80     
-96    16     
160    128    
-128   192    
-128   80     
-96    96     
192    32     
-224   -16    
48     80     
-16    80     
32     48     
112    128    
-208   32     
176    96     
-32    -16    
-32    -64    
160    -96    
-32    -16    
176    0      
80     32     
48     64     
64     32     
0      32     
-96    48     
64     96     
-464   -256   
224    64     
-240   -64    
128    64     
96     96     
-16    64     
112    64     
-96    48     
160    32     
-160   64     
144    288    
-16    -144   
-64    -112   
-16    144    
192    192    
-400   32     
176    160    
32     16     
-48    48     
0      48     
-64    -96    
128    -240   
-128   240    
272    112    
-176   64     
-64    -64    
192    80     
-48    48     
32     -32    
208    416    
-224   64     
-112   -64    
224    -112   
-144   144    
64     0      
-160   -48    
240    48     
-112   112    
96     80     
160    96     
-32    80     
-48    -48    
144    48     
64     64     
-32    96     
-16    16     
80     176    
-160   -32    
96     96     
16     -112   
64     0      
64     96     
64     64     
0      32     
-64    16     
64     96     
48     64     
-16    0      
-32    -16    
96     192    
-208   -112   
0      112    
144    80     
0      112    
112    64     
-16    160    
192    0      
-64    96     
128    144    
-128   64     
240    32     
32     112    
-16    64     
48     80     
-48    64     
-112   -224   
112    -240   
112    48     
-32    112    
112    48     
240    64     
-64    224    
0      96     
-112   64     
256    96     
-48    224    
144    368    
-272   464    
-368   112    
272    -64    
0      64     
144    112    
-80    128    
208    -2384  
80     16     
16     128    
-64    96     
64     192    
-64    -128   
352    400    
-208   112    
-144   -384   
80     -48    
128    -128   
48     80     
16     -32    
176    -400   
-96    80     
96     -544   
128    224    
-128   608    
32     512    
-32    176    
96     160    
-32    -96    
48     112    
-48    -112   
-64    -96    
224    48     
-416   -144   
64     32     
144    -288   
176    -128   
64     -320   
-80    -208   
144    -800   
304    544    
-96    240    
144    128    
-224   -320   
256    128    
-32    32     
144    -16    
-112   -240   
32     -352   
-64    -352   
272    -288   
128    240    
160    16     
240    272    
-144   -512   
128    -112   
-48    -1392  
0      -16    
144    -192   
128    224    
160    112    
-80    176    
240    192    
-112   -400   
128    -176   
176    -16    
-16    176    
240    -224   
-288   -112   
304    -400   
128    832    
-320   -320   
64     -416   
48     288    
-128   -240   
112    336    
-64    160    
-160   -256   
240    256    
32     656    
-80    -560   
-112   -592   
-112   -96    
656    272    
-256   640    
144    160    
-176   -352   
48     96     
-192   16     
16     64     
64     176    
-48    32     
32     144    
176    16     
-80    64     
48     -384   
32     -16    
-32    -96    
448    384    
-352   -400   
256    96     
-432   -2160  
-208   -640   
224    -320   
320    256    
-16    816    
16     -112   
-16    -848   
64     32     
-224   0      
208    -144   
-144   -208   
16     96     
240    112    
-80    -224   
96     64     
-64    -240   
144    -1680  
16     80     
80     -224   
16     -688   
-192   368    
64     -672   
32     144    
128    -144   
-48    -96    
160    -1184  
-32    -240   
144    128    
176    -48    
-144   128    
112    0      
80     -16    
-16    64     
96     -32    
48     -496   
-688   -48    
64     -240   
0      -336   
-64    -576   
64     -416   
0      -1280  
160    -528   
160    -16    
48     0      
272    192    
0      320    
32     -64    
0      0      
-240   144    
160    -32    
-336   -160   
272    96     
80     704    
16     -400   
-208   -464   
288    64     
-208   -96    
112    -64    
-64    -176   
64     -208   
192    80     
-32    -256   
48     176    
-48    -112   
80     144    
-16    720    
-48    -480   
-784   160    
-128   -656   
-16    -416   
-16    512    
32     -48    
-208   -496   
-224   48     
-64    -64    
48     16     
160    -48    
192    288    
-208   176    
32     -16    
-240   -352   
544    704    
-384   160    
48     -160   
128    -480   
48     -192   
16     80     
16     -496   
-160   -432   
48     -448   
352    320    
-240   -64    
128    -96    
-16    -16    
32     -176   
16     -272   
48     -80    
32     256    
-64    320    
-512   16     
224    -160   
112    -112   
128    -416   
160    -96    
80     -160   
80     80     
-144   32     
112    48     
-80    0      
-32    16     
240    32     
-48    64     
32     16     
144    -144   
0      -96    
112    -224   
32     -16    
96     -128   
192    128    
32     -32    
0      -272   
-160   96     
-32    -160   
-112   32     
48     32     
-112   0      
96     -48    
-320   -80    
288    -128   
-128   0      
-272   -928   
176    -208   
160    -352   
128    -32    
-96    -960   
-160   -288   
-192   -80    
-48    96     
-208   48     
64     48     
32     112    
96     128    
16     96     
176    32     
-416   -176   
80     -224   
64     -80    
576    -32    
-208   0      
16     -48    
-656   32     
80     240    
-1344  32     
-432   0      
160    0      
-336   128    
-32    -96    
-144   -96    
352    32     
-192   -96    
-1040  -96    
144    16     
-128   64     
96     192    
-224   48     
-208   112    
-352   -192   
-736   -336   
-224   -112   
-560   160    
-160   -224   
64     -16    
32     0      
16     -160   
-80    16     
-416   -224   
-144   -112   
224    -272   
16     16     
0      288    
-144   -48    
-336   16     
32     -16    
-80    -16    
32     96     
-112   96     
-208   -48    
-48    80     
-32    -16    
-112   16     
-32    -112   
64     144    
32     -32    
-144   48     
48     128    
80     0      
-256   -128   
32     -32    
-48    16     
0      16     
0      64     
-352   48     
0      32     
-224   32     
144    48     
-32    32     
160    64     
-160   -160   
-224   -192   
80     96     
-16    16     
-112   80     
-192   -16    
-80    16     
-48    -48    
48     0      
-272   0      
32     80     
-1248  -64    
192    304    
-224   -160   
32     160    
0      32     
-16    32     
160    128    
-208   128    
64     96     
-64    32     
-336   -480   
208    -128   
80     144    
-160   -16    
-48    64     
-128   -16    
-112   384    
-144   -64    
64     80     
64     -16    
48     32     
-80    -112   
-112   -64    
128    48     
-80    112    
-64    144    
-80    -32    
-128   32     
-128   -64    
80     128    
-576   -144   
64     48     
-288   16     
-16    32     
32     -16    
-176   -16    
0      16     
-128   0      
-32    0      
96     128    
64     128    
-160   112    
-80    48     
-112   -128   
48     64     
32     32     
144    112    
-1296  -48    
-32    112    
96     96     
-64    96     
128    80     
-112   128    
-336   -176   
256    -128   
48     144    
-208   64     
-32    48     
48     48     
80     -160   
-288   -384   
128    -32    
0      96     
-64    96     
144    240    
0      -112   
16     -112   
16     -32    
48     240    
-48    32     
-16    128    
176    784    
-192   64     
32     -64    
80     128    
-224   -240   
192    96     
-64    192    
-16    16     
-128   -384   
16     352    
-144   -624   
112    208    
-176   336    
-32    -96    
0      -320   
96     48     
-96    80     
-368   -400   
64     -96    
-160   400    
-64    208    
32     -112   
16     48     
32     176    
64     -160   
-272   192    
64     112    
-48    0      
16     -176   
32     528    
-80    80     
0      -16    
16     80     
48     -192   
-64    -32    
80     128    
48     176    
160    448    
-16    192    
-224   224    
16     -176   
32     144    
-128   112    
-128   -112   
-48    176    
0      -112   
160    208    
-16    -384   
-64    -224   
240    656    
-16    288    
144    208    
-176   -32    
544    304    
-48    672    
-112   96     
16     -112   
96     16     
896    816    
-1328  -480   
-112   -1184  
384    -592   
80     384    
176    176    
64     0      
-32    224    
-144   432    
368    640    
-176   160    
176    -240   
224    192    
272    432    
-64    32     
144    -48    
352    208    
-288   192    
512    96     
-96    480    
208    -192   
304    240    
-48    96     
208    -368   
48     336    
-112   -80    
192    -96    
32     240    
400    208    
-80    656    
-256   -656   
464    272    
16     480    
-160   -672   
-128   -160   
128    -176   
-80    96     
112    -1008  
32     96     
176    112    
-112   64     
48     64     
64     48     
64     80     
96     336    
-176   208    
160    -272   
-96    -64    
-400   96     
368    304    
-256   -48    
-32    -112   
144    -896   
-16    48     
256    128    
-96    112    
272    144    
-32    128    
608    544    
-656   48     
32     -288   
112    272    
16     -96    
0      352    
-48    -224   
-16    -80    
192    688    
-224   -416   
240    -416   
-128   -528   
-16    -512   
464    320    
-304   368    
208    -160   
64     832    
-176   -176   
96     -16    
112    96     
-48    -64    
0      80     
80     -160   
112    80     
16     -240   
64     112    
352    -192   
-384   -160   
-48    -176   
-16    -224   
240    384    
288    784    
-192   -64    
160    -112   
-112   -64    
112    -144   
-96    -176   
128    -464   
240    288    
80     64     
48     32     
160    -1344  
-304   -544   
64     16     
144    16     
-32    144    
272    192    
48     128    
64     48     
-80    -208   
-80    -160   
224    -16    
0      -192   
64     16     
16     -288   
128    32     
-16    -592   
64     -16    
-160   -784   
32     -384   
-16    -464   
-96    192    
128    96     
-320   144    
112    160    
224    -192   
-112   224    
-48    -256   
-16    192    
160    -240   
128    32     
-16    -48    
32     240    
0      -80    
-48    -112   
128    -112   
-80    96     
-128   16     
-64    -48    
96     0      
48     -192   
16     320    
160    -176   
-96    64     
160    -128   
-48    160    
32     0      
400    272    
-416   -64    
0      -1232  
-208   96     
320    -448   
0      -48    
-48    32     
128    -448   
-48    16     
-16    -1712  
48     16     
-112   32     
272    0      
-48    96     
16     -224   
32     -160   
176    96     
192    64     
-64    32     
240    -16    
176    -112   
0      -64    
32     0      
112    -96    
-112   -304   
96     32     
48     -192   
96     -304   
176    160    
128    -96    
32     48     
0      16     
112    -16    
-128   -416   
-144   -640   
304    -96    
-576   32     
384    192    
96     240    
96     448    
-160   -64    
0      -496   
224    -112   
368    0      
96     -160   
-16    16     
0      96     
16     -112   
64     32     
16     48     
48     -192   
-320   -176   
352    96     
-160   96     
16     0      
-192   96     
-160   -160   
304    -16    
16     -112   
48     80     
32     64     
16     0      
16     -224   
336    256    
96     -176   
32     80     
-176   48     
96     -384   
160    -32    
-32    -48    
96     128    
80     16     
208    16     
-240   -928   
80     128    
-144   -624   
-208   -80    
64     -16    
48     96     
-64    -32    
64     112    
-96    0      
-176   -112   
-32    -16    
32     48     
-736   32     
-32    -32    
160    -48    
-96    -304   
-160   112    
96     -688   
16     0      
32     -16    
192    -16    
-16    0      
96     -48    
-128   0      
144    -128   
-304   -80    
48     0      
-1040  112    
16     -176   
-96    -112   
16     -160   
368    144    
-64    -192   
112    96     
0      -16    
64     -144   
-144   -64    
96     16     
-96    -48    
-32    16     
-32    -48    
-80    -128   
-128   0      
-48    -112   
80     0      
96     -96    
96     80     
96     -240   
-112   -128   
16     144    
-80    112    
-64    64     
-128   -16    
32     -16    
112    48     
-128   64     
80     80     
0      -16    
16     16     
224    176    
-80    -144   
128    16     
-16    -320   
272    -64    
-240   64     
48     480    
-48    304    
-176   -128   
128    0      
160    -96    
-96    -80    
448    288    
-208   464    
-64    192    
80     288    
-80    -160   
-160   272    
-448   -96    
-368   304    
32     480    
-544   80     
-64    176    
-1888  -272   
-128   -176   
368    240    
-208   224    
96     -32    
-192   -320   
-64    -176   
256    128    
48     80     
-112   -32    
128    16     
-32    128    
-48    0      
-160   -416   
80     -208   
-496   -336   
-96    -64    
-528   -192   
-64    128    
-48    80     
160    112    
-272   288    
64     96     
64     16     
-16    -48    
32     -384   
-160   192    
32     80     
-64    -16    
-48    96     
144    64     
-32    80     
-224   -48    
-80    -32    
64     -144   
16     352    
112    -496   
32     496    
-32    208    
-32    64     
-256   80     
128    224    
32     496    
48     16     
-192   -80    
-32    624    
-240   96     
-320   -448   
16     -96    
16     32     
-96    416    
160    464    
192    128    
-176   -384   
48     -368   
-144   -368   
176    112    
-160   112    
128    -32    
-256   208    
-64    -192   
224    -304   
80     256    
80     96     
-160   80     
384    224    
192    256    
-176   192    
288    -144   
80     -16    
-48    80     
96     32     
192    -48    
208    -96    
64     -80    
-96    -32    
288    16     
112    32     
96     -208   
48     -304   
80     160    
-96    128    
0      -208   
-32    -32    
256    80     
-48    576    
-288   384    
32     -96    
80     -112   
-112   112    
-96    -32    
-192   -96    
-176   -272   
-16    112    
-416   -32    
-304   416    
-608   -1088  
-32    384    
-16    688    
-304   -384   
128    -208   
-224   -48    
272    144    
480    800    
-448   -480   
160    -688   
16     496    
112    -64    
160    128    
-64    0      
240    320    
16     320    
-128   240    
-176   -432   
112    64     
16     384    
-112   128    
128    -48    
-112   -208   
-32    -32    
-144   -608   
272    288    
-128   -272   
112    -96    
-144   112    
272    176    
-112   128    
64     80     
-80    160    
-48    -256   
-240   -80    
112    -304   
-80    -32    
96     224    
-288   -320   
16     -16    
64     160    
-112   -96    
16     -160   
-192   144    
240    -16    
-96    32     
224    400    
-192   176    
0      -288   
48     336    
-32    -80    
48     -112   
288    400    
-224   16     
224    -112   
-336   -240   
64     32     
96     480    
160    560    
-400   -272   
240    -144   
-16    -80    
64     16     
96     432    
112    -80    
-112   -400   
112    128    
144    208    
0      96     
-80    -416   
-16    96     
0      80     
48     192    
272    400    
-48    96     
80     192    
0      -16    
-160   0      
-96    0      
-64    -16    
48     -32    
96     48     
80     16     
-144   0      
112    176    
-32    144    
-144   16     
288    384    
160    128    
80     112    
-80    80     
112    64     
-16    64     
32     64     
64     96     
64     0      
64     48     
256    240    
-144   96     
32     48     
112    128    
-144   -160   
64     -704   
144    0      
-16    -48    
128    96     
-16    -96    
32     0      
192    48     
0      96     
-48    48     
96     32     
-96    80     
48     128    
32     96     
-80    0      
-32    64     
368    -336   
-288   128    
48     160    
128    96     
-16    80     
80     144    
-96    80     
112    144    
-288   32     
368    160    
-64    16     
80     80     
-16    32     
16     96     
-112   0      
-16    64     
128    96     
64     -240   
112    576    
240    368    
-144   192    
16     -144   
-64    80     
400    48     
-160   -48    
208    -48    
-80    96     
224    128    
-16    80     
96     -64    
16     208    
272    96     
-80    -528   
240    64     
96     128    
224    144    
-128   96     
272    -32    
-128   -496   
176    -80    
-48    -112   
-16    16     
176    144    
-160   96     
176    240    
16     -48    
208    176    
16     -368   
112    32     
416    256    
-336   288    
-192   -224   
-48    -32    
64     -48    
32     224    
-144   144    
64     160    
-128   0      
64     -208   
48     112    
-96    -528   
-144   144    
48     -80    
-352   -16    
112    -128   
32     -16    
-80    -288   
160    208    
-32    160    
128    32     
-64    -48    
48     80     
160    160    
16     -128   
96     112    
32     0      
-176   -192   
288    -224   
-48    64     
352    -384   
-16    224    
64     160    
-64    128    
-32    16     
-144   240    
224    -48    
-240   16     
528    80     
-208   -704   
432    160    
-112   -240   
144    96     
144    -288   
80     64     
96     -176   
176    48     
-64    -48    
112    176    
-192   48     
96     16     
-16    -272   
192    -96    
192    160    
-32    48     
48     80     
-64    -352   
112    80     
128    -128   
-128   80     
80     32     
-128   128    
144    64     
0      208    
96     160    
112    352    
128    176    
144    -32    
320    -480   
-144   0      
128    -720   
64     -48    
96     144    
176    -64    
-80    80     
-96    -80    
32     -16    
96     -48    
-16    -1456  
32     -96    
256    -288   
32     0      
-432   -112   
128    -48    
160    -64    
32     -800   
-16    -224   
-48    16     
144    -16    
64     96     
112    -128   
-48    -640   
-80    32     
192    -48    
0      288    
-64    -208   
16     -320   
-1840  -240   
176    -128   
48     -288   
-16    -80    
64     -16    
16     -32    
112    -32    
-32    160    
64     16     
48     -80    
-16    32     
80     0      
64     80     
-64    -32    
48     -96    
-112   -16    
64     -48    
-16    80     
224    128    
160    -224   
-128   -624   
240    608    
-192   -880   
-288   -224   
272    -144   
-112   544    
0      -512   
-96    112    
-96    -48    
-32    64     
-128   -144   
32     32     
-432   -240   
-16    -16    
-64    -112   
112    -352   
208    256    
-32    -512   
-32    -80    
80     80     
-48    144    
-48    -192   
-64    -240   
144    -144   
64     208    
-112   112    
48     -144   
-960   -32    
0      32     
64     -32    
112    -320   
64     192    
160    32     
-144   -144   
80     -1616  
112    -112   
48     -128   
128    64     
-64    48     
224    -112   
-128   16     
176    -32    
-160   -48    
48     16     
-48    32     
80     32     
16     0      
80     -288   
32     64     
48     -560   
96     48     
16     96     
96     -80    
-176   -144   
128    -96    
-224   80     
-96    -80    
0      48     
128    -80    
-560   32     
208    32     
-64    112    
160    -352   
416    176    
144    192    
144    144    
-32    32     
-128   -224   
432    -160   
-144   -32    
320    144    
400    336    
-496   160    
16     -32    
-464   128    
464    224    
-96    224    
-144   -144   
416    -16    
192    -128   
512    48     
-288   240    
256    528    
-176   384    
96     64     
-160   -144   
-176   -96    
-48    -80    
-208   -208   
-272   -64    
-112   208    
160    48     
-64    -160   
128    96     
-848   -32    
-1600  -224   
-128   -288   
-704   608    
-224   16     
32     -240   
-336   576    
80     528    
-48    48     
-256   -656   
-176   48     
-112   112    
-32    -176   
-192   -288   
256    208    
-240   96     
240    -32    
-128   -288   
-16    320    
-176   -144   
-400   64     
-80    16     
32     160    
16     144    
-80    -176   
48     -880   
-560   304    
48     -16    
-544   -976   
-224   -528   
48     240    
-192   416    
-48    144    
-144   -160   
-48    128    
-192   400    
-96    256    
-64    -144   
-288   -368   
-480   -224   
112    144    
-144   16     
192    0      
96     -112   
-64    -32    
96     -64    
64     -96    
-96    -192   
-256   -80    
160    0      
-192   -32    
0      -176   
-32    -64    
-48    -48    
32     -320   
32     -32    
144    -272   
32     128    
-80    -272   
-80    -64    
240    112    
-208   48     
16     128    
240    224    
-80    96     
-144   -32    
-48    -16    
112    48     
-160   -64    
48     0      
-64    96     
-48    64     
-80    32     
-16    144    
-208   48     
-96    128    
-272   -336   
112    -96    
-16    64     
16     32     
-240   16     
128    64     
-144   -64    
48     112    
-32    48     
96     -32    
64     -80    
288    192    
-352   32     
176    96     
-192   272    
208    208    
-80    112    
-96    96     
-128   64     
-64    0      
128    64     
-144   -48    
144    96     
-432   -32    
144    64     
-48    224    
16     64     
-304   -240   
480    -48    
-32    176    
-192   144    
112    -80    
272    64     
-80    48     
48     32     
112    32     
-144   32     
32     96     
-272   -16    
128    48     
-336   80     
128    48     
0      64     
0      -48    
-16    16     
64     32     
-16    -16    
-16    48     
64     80     
-144   -16    
-48    80     
-96    -16    
80     144    
-128   -32    
-32    64     
112    64     
-112   -80    
16     16     
336    336    
-272   -48    
96     64     
112    48     
-160   64     
96     0      
-192   -16    
144    288    
-96    -96    
-240   -64    
256    0      
-128   -16    
-32    48     
128    320    
96     224    
-112   112    
-48    64     
32     112    
-16    16     
80     64     
-144   -112   
-16    -144   
-16    -112   
0      128    
32     80     
-96    80     
-48    80     
16     112    
-64    160    
160    80     
-224   -224   
208    128    
-32    224    
-112   32     
16     48     
96     80     
-80    48     
32     32     
-256   -64    
160    16     
-240   32     
-80    -128   
160    176    
-48    48     
176    96     
-16    16     
64     80     
192    384    
-144   64     
-32    -80    
96     -112   
-160   96     
-96    224    
32     -96    
48     112    
256    96     
-160   48     
224    288    
128    128    
144    96     
-64    80     
-288   -480   
0      -48    
0      96     
16     -16    
-80    96     
-224   -352   
240    176    
176    288    
-224   -480   
-176   -352   
256    96     
96     224    
-240   -16    
0      112    
112    64     
-32    80     
96     32     
240    112    
-160   -64    
176    32     
368    160    
-48    96     
64     48     
96     -528   
-80    -96    
80     64     
128    80     
-64    176    
0      -32    
240    176    
48     32     
-64    -16    
176    80     
-32    -32    
128    112    
-32    -160   
0      128    
-64    32     
32     -592   
-48    -80    
-192   -656   
112    -32    
208    48     
128    80     
-96    16     
240    0      
-80    208    
144    128    
-288   -96    
192    80     
96     144    
-80    144    
176    -208   
0      64     
224    256    
-336   -96    
336    0      
-32    80     
224    176    
32     -16    
96     128    
112    48     
80     160    
-48    0      
0      -48    
128    64     
-16    192    
96     240    
-80    -160   
-64    -128   
240    -240   
32     -304   
-192   -128   
128    16     
-32    256    
384    624    
-336   96     
176    64     
96     352    
96     112    
-16    32     
192    -176   
-192   32     
48     224    
-16    -48    
80     -448   
176    -112   
-80    -928   
-48    816    
448    -240   
-176   560    
-16    -208   
-192   -80    
368    224    
-208   48     
128    96     
-80    -80    
224    112    
-96    -64    
80     64     
144    -176   
-32    80     
48     -96    
16     96     
16     -1296  
32     368    
-112   176    
128    -144   
112    144    
112    176    
80     224    
0      -208   
80     -96    
0      160    
-32    -176   
176    -80    
-48    112    
224    -304   
64     144    
-32    -464   
160    112    
-128   64     
176    64     
-32    80     
-32    -288   
-64    80     
96     -192   
112    128    
176    112    
-64    -112   
16     -304   
128    32     
-48    -208   
144    128    
176    -576   
16     32     
16     112    
192    720    
-32    416    
128    272    
-48    608    
112    112    
-192   -16    
240    48     
-48    16     
80     0      
32     32     
256    192    
-176   144    
48     80     
-48    -1280  
192    -16    
-80    -16    
160    96     
16     -48    
144    -128   
128    -32    
-160   -1328  
64     -112   
-48    96     
32     -144   
-128   -160   
144    32     
-96    -656   
64     -16    
64     -208   
-128   -352   
-208   -384   
112    -224   
-672   -48    
176    -64    
-208   -352   
-96    -336   
32     160    
48     -64    
112    -64    
80     64     
0      -352   
96     -784   
304    432    
-48    16     
-144   -32    
-320   -160   
880    -352   
-432   144    
80     -48    
224    96     
-176   -784   
-96    -240   
-32    80     
112    -64    
-64    -112   
224    112    
80     96     
144    144    
0      -304   
144    32     
-272   128    
96     -288   
-384   -144   
-80    -160   
-880   -144   
112    -160   
80     -80    
-176   -576   
192    -80    
-160   -880   
-128   -192   
-96    -32    
240    96     
96     -160   
128    -128   
-208   -32    
400    544    
-288   256    
96     208    
-1184  368    
-352   352    
240    96     
-16    -80    
-16    -112   
32     -64    
-48    -80    
64     -496   
64     -224   
208    -128   
176    128    
-16    272    
-144   144    
-16    32     
144    -112   
-480   0      
128    -160   
64     160    
-80    64     
-96    -336   
0      -448   
-80    -384   
16     -1056  
128    208    
-416   16     
48     -48    
-80    -32    
96     -80    
-128   32     
-96    -112   
-560   -16    
384    -128   
-304   0      
112    -64    
-144   -32    
224    -448   
-128   80     
64     -656   
-16    144    
80     96     
-144   16     
-48    16     
48     -32    
-208   -16    
112    0      
-16    64     
176    128    
-352   96     
80     -48    
48     -48    
-16    -128   
144    160    
80     -144   
160    80     
0      48     
16     -96    
-176   -112   
176    -192   
-96    96     
80     80     
-320   -192   
64     -64    
0      -48    
96     -144   
-144   128    
48     -16    
160    160    
128    -112   
224    -32    
-144   32     
-48    -160   
48     112    
96     32     
-48    -48    
96     -144   
-96    0      
112    -224   
-80    -48    
240    -208   
176    112    
-672   -320   
240    32     
-96    48     
-672   -32    
256    352    
-608   32     
352    64     
-928   -32    
192    -48    
-320   -32    
112    96     
48     -32    
