# Supplementary material for: A Fault Diagnosis Method for One‐Dimensional Vibration Signal Based on Multiresolution tlsDMD and Approximate Entropy
Source: Hindawi journal article supplement (doi:10.1155/2019/3262818), 2019-01-01
Supplement: f1 [file 3262818.f1.zip › 3262818.f1/gear signals/wear gear signal/Data15.txt]

-144   224    
0      -368   
16     64     
-208   224    
224    144    
-96    0      
-352   -112   
-400   -736   
-128   256    
-544   112    
-928   -560   
256    -16    
-1040  160    
352    160    
-448   -560   
-144   400    
-240   -688   
32     80     
208    160    
-160   -240   
16     304    
-80    160    
-48    -144   
32     368    
-144   -416   
-32    208    
-304   -736   
672    64     
-176   336    
96     -416   
416    384    
0      496    
0      112    
272    -144   
-128   32     
-128   -192   
-48    64     
96     -80    
-16    64     
-16    16     
48     48     
-48    -160   
-256   -208   
128    592    
-208   192    
176    -64    
-592   0      
320    224    
-80    -48    
48     176    
112    -112   
-64    -112   
48     48     
-160   -48    
192    224    
-224   -160   
224    896    
-256   -112   
80     224    
-128   176    
32     -160   
-192   176    
-544   -624   
480    -48    
-176   672    
288    320    
80     -256   
-208   192    
80     -704   
-128   416    
-272   -480   
96     304    
-16    288    
-288   -96    
-112   0      
-48    -16    
-384   0      
32     80     
0      -16    
16     96     
-112   -144   
-64    -16    
16     176    
32     336    
160    0      
-112   -624   
336    496    
160    560    
-128   48     
128    0      
0      0      
-16    448    
16     -352   
-608   -304   
192    176    
-224   -80    
80     80     
32     -160   
-272   -368   
160    -160   
-208   -192   
64     32     
-32    256    
0      176    
144    176    
-112   -80    
-48    144    
144    256    
-320   -96    
96     112    
368    192    
-160   176    
48     176    
400    544    
-192   240    
336    496    
-480   320    
16     112    
0      -32    
64     16     
80     96     
-288   -144   
144    160    
-144   16     
144    112    
-304   112    
-160   64     
-48    64     
128    80     
80     0      
-48    48     
-48    96     
-48    96     
32     48     
-240   -16    
32     64     
-448   176    
368    144    
-272   0      
64     0      
-16    96     
0      80     
368    416    
-448   464    
80     96     
-240   -144   
224    -16    
48     0      
-128   48     
-32    -32    
0      96     
-128   -16    
96     112    
-320   -96    
-48    32     
-32    16     
-64    32     
-48    64     
-48    112    
64     48     
0      16     
16     64     
0      -32    
32     112    
-80    -48    
224    368    
-272   144    
32     -32    
-80    -224   
176    16     
80     112    
-16    32     
-112   16     
32     -64    
-144   64     
336    432    
-528   48     
288    -400   
-80    -160   
256    -64    
288    32     
-240   -96    
160    464    
-128   64     
96     16     
304    224    
176    128    
-256   -208   
-80    -80    
80     32     
112    128    
32     224    
128    208    
-224   -16    
-112   -144   
-64    -192   
-16    160    
32     208    
-96    16     
368    16     
160    -96    
-16    -80    
16     208    
0      96     
-32    64     
144    464    
288    464    
-128   240    
-160   352    
-80    160    
128    16     
-32    -128   
32     -384   
176    -48    
112    128    
-80    -368   
0      0      
-16    128    
-240   64     
160    112    
-192   -16    
64     64     
16     144    
0      112    
-192   0      
224    144    
-64    64     
16     -160   
32     144    
32     64     
-32    -32    
-192   112    
112    32     
0      16     
32     64     
96     48     
128    112    
64     64     
-32    96     
96     -112   
-96    -32    
-48    80     
32     -16    
48     128    
-80    -912   
0      128    
384    144    
-96    64     
48     48     
144    64     
32     64     
-16    64     
32     176    
64     64     
-240   -80    
160    96     
-80    80     
112    -48    
0      112    
16     -896   
112    128    
48     48     
64     80     
-96    -32    
224    208    
-32    -64    
16     128    
-160   -16    
80     48     
80     64     
-32    32     
48     176    
160    -32    
0      96     
144    -512   
-128   48     
112    -272   
-48    96     
192    96     
-176   192    
-192   112    
-16    112    
96     -112   
208    96     
-32    32     
0      -272   
400    304    
-256   0      
-48    272    
288    -48    
-48    -32    
-80    192    
-16    128    
-16    -96    
32     288    
-64    128    
128    256    
-16    -64    
48     -144   
336    256    
-64    368    
96     208    
-64    -352   
0      336    
208    -400   
128    416    
-80    -48    
176    -96    
64     -144   
16     0      
64     0      
240    -192   
-256   -400   
0      -80    
-16    -256   
-48    64     
-64    144    
160    -16    
96     496    
48     16     
160    128    
-80    -368   
96     -400   
144    80     
64     176    
64     16     
0      144    
112    32     
32     -592   
0      64     
-32    -128   
112    -32    
112    432    
32     -576   
-32    224    
112    384    
-16    16     
-80    144    
128    -16    
128    576    
96     0      
-320   -784   
256    336    
80     272    
-192   -96    
48     -272   
224    0      
-32    144    
176    560    
256    0      
-128   112    
304    -352   
-272   -272   
64     48     
-160   -1488  
64     144    
-96    -144   
-80    -80    
192    -192   
256    64     
80     -144   
-208   -768   
272    -208   
288    240    
-208   208    
224    -48    
208    -32    
-96    0      
144    -16    
272    -32    
176    48     
176    -128   
32     -256   
-688   -144   
64     80     
192    -368   
224    -528   
112    112    
96     112    
-16    0      
0      -176   
176    -576   
240    800    
-320   864    
208    0      
160    32     
-176   32     
-16    -64    
-976   -192   
48     -272   
-48    16     
-32    144    
-368   -176   
544    -1680  
-32    240    
80     384    
-224   -192   
80     -272   
-64    -192   
288    -48    
224    800    
-416   -928   
240    -624   
-192   560    
288    -80    
144    112    
-32    -80    
368    288    
-128   112    
-128   -224   
16     -1056  
160    272    
-128   512    
48     -128   
64     -160   
112    -208   
-304   -240   
384    -304   
-16    192    
96     -224   
-448   -32    
128    -208   
128    176    
0      -64    
64     0      
-80    -128   
-16    -416   
-208   -2176  
192    -368   
16     -96    
-16    32     
-208   -240   
48     48     
-192   -96    
48     -208   
-496   -400   
32     416    
-992   -272   
0      32     
256    400    
-208   -192   
32     -208   
48     -848   
-16    -128   
64     -160   
272    304    
-208   -16    
288    -192   
-672   -464   
176    -80    
-240   352    
432    640    
-640   -272   
192    -560   
-16    -144   
32     -176   
176    560    
128    -336   
-64    -384   
128    160    
128    112    
-672   -112   
64     -576   
-144   112    
144    144    
-160   0      
208    160    
-304   64     
32     -64    
160    16     
-272   -192   
96     -128   
-80    -496   
128    0      
-160   48     
128    -80    
-160   48     
288    288    
-80    128    
-16    0      
80     256    
192    48     
-16    64     
-16    -16    
144    64     
64     -80    
16     48     
-1360  -64    
-656   -32    
-16    32     
272    128    
-160   64     
80     48     
-48    96     
-80    -224   
-128   -176   
224    -48    
48     0      
-176   16     
0      -80    
-112   -192   
192    32     
-144   32     
-96    64     
-16    16     
-272   48     
-80    32     
-736   64     
-208   -80    
112    0      
288    240    
-272   144    
0      112    
-16    -208   
16     80     
-96    -176   
-96    64     
80     144    
-272   64     
256    144    
-80    -48    
-16    -16    
-96    32     
-32    48     
-240   64     
-96    112    
-32    -32    
32     144    
-32    496    
112    224    
-224   -32    
-64    -192   
-112   80     
208    -48    
-192   -160   
96     -64    
-176   64     
160    192    
-32    48     
-48    -160   
-128   208    
144    -80    
-16    32     
176    -64    
112    160    
192    64     
-240   112    
160    -32    
-224   -176   
96     -176   
-80    -48    
-112   0      
96     176    
-288   128    
-448   160    
-160   0      
-288   16     
64     80     
32     -176   
400    400    
-336   304    
-224   32     
-96    32     
64     16     
16     144    
-128   144    
0      112    
-128   -16    
0      -32    
-160   32     
-144   -304   
-352   32     
64     192    
-496   -160   
96     128    
0      -32    
-192   -64    
160    160    
-96    176    
80     48     
-112   -64    
16     80     
16     64     
0      0      
48     80     
32     96     
-800   -256   
240    -32    
-128   -96    
224    -80    
-48    160    
-64    64     
-32    96     
-208   0      
-176   192    
16     -80    
-288   32     
384    16     
-208   48     
144    16     
-144   16     
-416   -80    
208    112    
-1184  -48    
80     96     
48     -32    
-48    176    
-16    80     
-208   96     
192    144    
-144   80     
192    80     
176    160    
-96    16     
-128   -32    
-128   -144   
-32    -48    
128    128    
-112   112    
-32    112    
-224   64     
64     96     
-48    112    
32     176    
128    96     
64     144    
112    80     
192    192    
-96    144    
-16    16     
112    80     
-64    32     
160    80     
-128   32     
-208   -48    
-48    -48    
64     32     
-64    -64    
32     -48    
192    64     
-16    96     
-144   0      
-48    -16    
224    64     
-48    48     
48     16     
-304   80     
80     112    
32     48     
48     80     
-64    -160   
-64    96     
208    576    
0      224    
-192   -80    
-48    -32    
112    176    
80     288    
80     32     
-48    384    
80     320    
-16    112    
112    208    
-48    112    
48     144    
32     0      
64     -16    
96     96     
0      80     
48     64     
16     80     
64     96     
-64    64     
-48    96     
-64    -192   
144    -304   
144    32     
-48    288    
16     -352   
0      32     
128    656    
-176   -16    
224    -48    
-144   512    
112    144    
-160   192    
112    176    
-272   -80    
256    304    
-192   -192   
16     -1712  
96     176    
160    96     
-176   -128   
160    -96    
16     256    
64     80     
-128   -48    
176    -48    
192    176    
-80    224    
192    -64    
-96    -48    
224    192    
-128   160    
0      -224   
128    64     
-16    352    
144    -224   
-160   -320   
144    -80    
96     48     
112    64     
32     112    
-80    80     
128    48     
-80    112    
160    -128   
-144   64     
-16    48     
0      -192   
80     48     
-32    -32    
96     128    
32     96     
112    112    
16     144    
16     0      
-224   -288   
0      -272   
112    -160   
48     176    
-48    -80    
96     208    
224    272    
192    -192   
464    560    
-176   -512   
96     160    
432    192    
-48    240    
80     32     
96     -32    
272    256    
144    144    
-224   400    
656    448    
-352   176    
-368   -576   
-32    -176   
-240   -48    
352    16     
-240   -64    
528    528    
-16    512    
-80    496    
112    -32    
96     416    
80     -240   
-176   -224   
-288   -672   
64     -256   
80     80     
112    -16    
-80    112    
-48    16     
224    16     
240    -432   
0      96     
-96    -640   
-48    -64    
-96    32     
-128   864    
-160   -576   
0      -160   
-192   688    
16     -528   
-80    -384   
304    -416   
-80    256    
160    16     
-64    -128   
432    256    
-32    320    
-176   -96    
256    16     
80     128    
-64    752    
32     -256   
16     160    
-16    48     
336    224    
-16    -224   
-128   -512   
432    -272   
-416   560    
560    -256   
352    272    
-144   320    
-96    416    
32     96     
-64    -304   
144    176    
16     400    
64     208    
-128   -192   
32     -944   
-128   112    
16     96     
16     352    
16     -96    
-16    48     
320    0      
-192   144    
16     -80    
128    192    
256    -768   
-128   256    
128    224    
48     288    
-48    80     
240    128    
-112   96     
336    320    
-16    240    
192    272    
-128   272    
-32    -48    
128    384    
192    64     
-144   -16    
224    144    
-208   -1712  
-96    -16    
-48    -1264  
272    -1408  
64     -80    
-32    -48    
192    144    
-16    -688   
-48    -160   
16     16     
-48    -112   
-32    96     
-16    64     
80     -208   
112    320    
64     32     
-16    32     
-32    -160   
64     -208   
-272   0      
-80    -64    
80     -288   
112    -704   
80     -16    
96     -864   
-48    -208   
304    112    
-128   -304   
80     -720   
32     -96    
96     -208   
48     -32    
-160   0      
112    64     
-384   64     
-192   48     
112    -176   
64     -16    
16     -208   
112    -384   
64     80     
384    624    
-272   -80    
32     -288   
416    48     
80     304    
-272   16     
0      48     
256    -128   
-208   -32    
128    -192   
-368   -48    
32     -176   
80     96     
256    -384   
-16    32     
80     -544   
-144   96     
144    64     
96     128    
128    128    
80     -48    
-160   -96    
0      -128   
-64    32     
32     48     
-784   -16    
-32    0      
16     16     
0      -208   
0      48     
128    -496   
-144   -176   
240    80     
96     80     
-224   -64    
192    -80    
-192   16     
144    32     
-144   -64    
-208   160    
96     80     
32     80     
-368   -96    
-48    -48    
160    -144   
0      48     
144    96     
64     -256   
-16    80     
-112   64     
96     144    
0      240    
64     304    
-224   -16    
128    -64    
-240   -32    
176    -176   
-192   64     
-48    -32    
-32    -32    
-80    -288   
96     304    
48     -1344  
16     -160   
128    96     
64     16     
-192   48     
112    16     
-576   32     
288    16     
-272   32     
144    -96    
-176   192    
32     -224   
64     16     
112    -256   
-16    112    
96     -240   
0      -240   
96     112    
192    32     
-288   32     
112    -256   
96     -32    
32     160    
-96    -48    
-32    0      
-1776  -32    
128    -240   
16     112    
128    -80    
-64    32     
272    528    
112    80     
-64    96     
80     -48    
-112   -48    
192    368    
96     -32    
-112   -144   
176    96     
160    112    
-384   -64    
-128   -112   
96     176    
-80    -96    
-80    96     
64     96     
-128   112    
-224   -32    
-400   144    
128    144    
-1104  -80    
0      32     
208    0      
-80    -16    
112    96     
-48    32     
-128   -32    
96     64     
-224   -48    
16     -16    
-384   64     
96     96     
0      128    
-16    96     
-144   64     
64     272    
48     16     
-112   -160   
32     80     
176    32     
224    64     
32     64     
-48    304    
-384   -80    
48     32     
16     288    
-16    48     
-224   16     
64     64     
-160   16     
-608   -304   
-32    112    
-224   480    
48     160    
-432   16     
0      0      
-272   -320   
16     -16    
-16    -96    
-256   64     
0      176    
-224   80     
32     144    
-160   -32    
-48    32     
-112   48     
-16    144    
-448   -80    
-224   0      
-1136  -208   
32     368    
16     -64    
112    -160   
32     -144   
0      160    
-80    -64    
-64    288    
48     -240   
128    304    
-112   400    
224    -208   
-208   272    
-80    -304   
128    112    
-432   496    
64     96     
-112   416    
-64    -480   
336    0      
-160   -336   
144    320    
-112   128    
320    -112   
-176   96     
48     48     
0      -16    
64     96     
-368   -64    
48     176    
-16    0      
-16    80     
64     -96    
-48    48     
-96    -16    
-144   -144   
0      -176   
240    112    
-240   288    
-112   -272   
-32    -176   
-160   -16    
272    160    
-256   272    
176    48     
-48    176    
-128   -176   
-416   -240   
-288   112    
-32    176    
112    96     
-96    128    
224    48     
-48    48     
96     64     
-16    64     
96     80     
48     96     
-128   80     
256    496    
-192   416    
48     96     
-80    32     
32     32     
32     80     
-128   -112   
192    -80    
400    480    
0      768    
-48    192    
272    464    
-32    176    
96     144    
-80    16     
-208   160    
0      -48    
-32    128    
96     48     
-176   -112   
128    32     
-128   80     
16     -16    
-112   80     
160    64     
-80    128    
64     80     
-144   192    
-80    112    
80     160    
16     224    
-256   -112   
-80    -80    
192    -112   
-32    240    
64     -64    
16     96     
-208   -48    
-96    -272   
160    -560   
-96    -224   
144    16     
-304   -80    
192    -32    
-32    -112   
176    -112   
-304   -48    
-16    -288   
128    -16    
-96    224    
112    -336   
-128   48     
160    144    
0      64     
304    480    
-624   -368   
96     16     
208    192    
-128   880    
-192   -64    
96     -176   
128    -16    
-176   -32    
64     -304   
-80    -80    
96     240    
-48    48     
208    48     
-32    -16    
64     0      
32     16     
80     384    
112    -64    
272    48     
-192   -96    
96     32     
32     -192   
80     -64    
224    -32    
-176   -352   
304    96     
-176   224    
0      128    
16     208    
160    240    
-32    832    
112    432    
-240   -160   
-80    336    
-16    80     
-192   0      
-32    -64    
48     -48    
-272   -432   
-16    -192   
48     -112   
112    -48    
64     176    
-32    224    
-32    288    
0      128    
0      128    
-224   -64    
-48    16     
-80    -48    
-16    -272   
16     -80    
112    -240   
-32    -272   
352    -224   
128    96     
112    144    
-80    48     
0      -16    
352    64     
-112   80     
32     -16    
-96    -208   
384    -96    
0      192    
288    -656   
-208   -16    
224    -2640  
16     80     
112    144    
80     128    
-48    -32    
16     -16    
176    16     
192    160    
-48    48     
144    160    
0      48     
96     96     
96     -16    
48     -80    
48     -16    
80     -144   
240    208    
-48    16     
48     160    
0      48     
64     80     
112    32     
320    208    
-160   16     
192    144    
-96    -176   
224    -128   
128    160    
-64    -80    
32     144    
112    -304   
-64    -32    
64     -2000  
256    256    
-160   160    
176    144    
96     144    
-48    128    
-128   -32    
112    16     
-48    -80    
48     -64    
-48    16     
304    160    
-96    32     
64     -80    
336    80     
-48    -448   
128    144    
96     112    
-208   -208   
256    64     
0      288    
240    0      
-240   144    
416    96     
-240   32     
176    96     
80     -32    
-32    128    
-32    -240   
224    112    
64     -160   
-64    -16    
96     -512   
80     64     
96     160    
-80    80     
80     64     
208    96     
-80    80     
112    208    
-16    160    
16     -192   
144    192    
16     -64    
128    144    
144    -160   
64     48     
160    -864   
-32    160    
0      -16    
224    160    
0      -64    
-288   -208   
384    -80    
144    -304   
-144   128    
304    96     
-160   144    
224    -48    
32     160    
208    -224   
-240   32     
384    64     
-144   48     
16     48     
288    -544   
32     16     
16     -96    
80     -2016  
16     -64    
112    -656   
144    -304   
-16    -80    
272    -160   
64     144    
-16    -32    
64     -880   
-64    64     
176    -80    
-96    304    
240    32     
256    16     
-1056  -128   
-32    -352   
80     16     
96     -128   
-144   -192   
112    -48    
-240   -368   
160    -48    
208    0      
-144   -320   
-16    128    
80     -128   
-160   64     
16     128    
0      -48    
16     -32    
96     0      
-80    16     
-32    -208   
256    64     
112    208    
-160   16     
0      80     
0      0      
192    -208   
-112   96     
160    -128   
-96    160    
-32    -16    
112    16     
256    432    
-192   384    
-64    -16    
64     -80    
112    32     
304    272    
-128   400    
-128   -592   
-336   -32    
48     0      
128    192    
-96    128    
160    0      
-224   -48    
80     -176   
-528   -48    
272    64     
-752   176    
-80    -32    
160    16     
64     -272   
-176   -272   
32     -272   
160    -32    
-144   -208   
32     80     
-112   0      
176    -80    
-240   -208   
128    -448   
-144   48     
64     96     
-160   176    
176    176    
96     -80    
0      -160   
-16    -208   
288    -192   
48     -32    
96     -224   
336    208    
-160   144    
-48    16     
-64    0      
64     -16    
-16    0      
64     -160   
-336   -48    
144    -240   
-272   128    
192    -64    
-16    656    
224    48     
-48    -32    
-16    -976   
96     -400   
144    -208   
-32    -192   
0      -528   
320    160    
-672   16     
32     -16    
-112   -16    
0      16     
-96    0      
-16    -208   
128    256    
144    256    
-192   112    
0      -192   
-128   -416   
-160   272    
192    -272   
-64    336    
-208   288    
-112   -512   
368    112    
-288   416    
-48    -160   
224    -64    
64     224    
0      -32    
96     -192   
16     256    
64     -48    
352    336    
-240   352    
0      336    
160    -48    
-240   48     
32     80     
64     -48    
-80    144    
384    -176   
-304   32     
-16    -112   
96     80     
-96    -80    
48     64     
-128   96     
-480   -16    
-128   0      
-1424  -80    
-96    64     
64     -16    
320    64     
-128   16     
336    176    
-32    240    
-32    144    
-592   -192   
192    144    
128    128    
48     288    
-48    144    
-304   208    
32     -16    
-272   16     
-32    48     
-96    496    
64     304    
-1056  128    
96     240    
-384   0      
128    112    
-16    -32    
0      144    
-32    -96    
-304   -48    
48     80     
-32    208    
112    128    
-224   96     
32     80     
-112   -96    
-112   -48    
-976   80     
-48    368    
80     -496   
64     -208   
-48    -208   
-240   -144   
-32    -208   
-16    160    
-80    128    
32     80     
-304   -176   
-48    -272   
160    384    
-240   32     
-304   -128   
-336   16     
-80    96     
-848   -32    
-64    128    
16     -144   
-160   -160   
176    -208   
-16    640    
64     480    
-80    -352   
-32    64     
-64    -80    
-48    -208   
-16    -32    
96     384    
-96    16     
224    1024   
-464   -208   
304    256    
-288   -304   
-32    48     
144    80     
-240   -256   
112    352    
32     -192   
0      320    
-96    176    
64     -224   
32     224    
0      0      
-16    64     
64     48     
-128   128    
16     448    
336    48     
-64    48     
144    448    
-48    560    
-256   352    
-64    96     
0      80     
-112   -176   
-16    -112   
-192   -16    
32     96     
-336   -160   
128    272    
-32    -48    
-384   -208   
-480   -336   
-128   64     
-128   80     
208    352    
304    336    
-128   -64    
-208   -128   
272    -16    
48     224    
-48    80     
-80    80     
16     32     
112    208    
-288   -96    
112    32     
48     336    
176    176    
-336   -528   
272    240    
-48    160    
-352   -160   
64     160    
-160   -128   
-208   144    
128    -16    
-288   256    
80     -80    
0      144    
32     -112   
16     208    
32     48     
-48    48     
160    64     
-128   -208   
96     16     
48     64     
-160   80     
48     96     
-144   -144   
208    96     
-304   32     
-160   16     
128    176    
96     224    
-96    224    
-112   160    
368    176    
176    -48    
-224   48     
64     48     
-32    96     
176    240    
-192   96     
64     48     
-128   64     
-160   -64    
-224   0      
80     112    
-96    48     
0      112    
176    96     
-176   16     
64     -16    
96     144    
32     128    
64     144    
64     80     
16     -64    
144    48     
96     144    
-48    80     
-16    32     
208    96     
128    16     
-176   -96    
224    176    
-32    64     
-128   192    
272    16     
-80    64     
0      96     
80     64     
80     144    
-144   80     
-16    80     
144    80     
-64    96     
224    48     
16     272    
112    0      
-96    16     
80     176    
64     48     
-48    64     
64     80     
-48    80     
400    -144   
-384   80     
240    64     
-304   64     
208    192    
-48    0      
-96    -1072  
48     208    
176    0      
160    272    
-80    112    
-160   -128   
160    -16    
16     112    
-128   112    
112    160    
32     176    
-160   0      
-112   208    
144    80     
-528   -320   
288    -576   
96     112    
-112   96     
144    96     
-96    32     
96     192    
-160   -32    
16     128    
112    -80    
32     48     
-128   -208   
128    96     
48     0      
64     176    
48     80     
-32    -288   
32     128    
144    -1264  
-112   0      
-48    0      
224    32     
16     80     
32     96     
112    48     
-144   -80    
112    32     
128    112    
-16    32     
-16    -176   
-48    80     
256    128    
-416   96     
208    -368   
16     112    
-320   128    
432    96     
96     64     
-192   80     
16     -64    
-144   208    
176    32     
32     176    
80     160    
-304   -80    
224    80     
-32    -208   
48     32     
48     -400   
0      80     
48     -1024  
-144   160    
112    -32    
-32    64     
0      -16    
-48    272    
16     96     
64     112    
-64    -176   
16     -240   
272    208    
-224   -192   
240    -32    
16     -368   
144    128    
128    -848   
-176   224    
-16    -1136  
-128   80     
96     16     
224    352    
-272   96     
-240   -672   
-64    -544   
336    144    
-144   -32    
160    112    
-160   144    
0      0      
16     208    
32     304    
208    400    
-16    64     
112    160    
-64    -224   
-160   32     
160    -32    
64     272    
-16    80     
-32    -256   
400    176    
112    -416   
0      128    
80     -272   
-16    128    
-112   -32    
288    208    
208    128    
160    192    
-16    16     
-48    608    
96     384    
-160   48     
352    416    
-16    336    
-64    208    
-16    144    
512    448    
-16    576    
16     480    
64     -64    
-192   176    
128    272    
144    32     
-96    -64    
-192   64     
16     288    
0      -208   
-144   -288   
-16    -48    
32     -240   
48     80     
112    128    
0      -64    
96     -96    
272    -240   
-144   -144   
192    -432   
-176   -192   
144    -192   
-32    -272   
96     -496   
160    192    
64     640    
-48    -208   
32     -192   
80     48     
160    -96    
-64    -224   
48     80     
48     -112   
16     0      
144    144    
112    0      
16     144    
-48    -352   
0      -32    
-384   224    
-192   -448   
416    -432   
-16    352    
-48    -64    
112    -1136  
-48    -96    
208    336    
96     128    
384    272    
-256   560    
96     -96    
-304   -384   
64     -320   
32     -240   
176    624    
0      0      
-128   -32    
160    -352   
96     -256   
320    848    
-256   192    
112    -1520  
160    128    
96     96     
-352   -80    
128    -32    
240    208    
-224   -64    
128    -32    
-624   -144   
240    -144   
-1264  -96    
80     -160   
32     -48    
48     16     
80     -64    
-192   -432   
288    -192   
-176   -240   
0      576    
128    64     
-64    -48    
-16    64     
-32    -176   
-64    64     
48     80     
-112   96     
208    704    
64     192    
272    -16    
-336   224    
128    -688   
64     80     
-128   -512   
208    -224   
112    144    
48     240    
-48    -48    
240    224    
-80    64     
-48    32     
32     48     
-32    32     
-448   -96    
0      128    
560    576    
-240   432    
-128   -80    
192    -1264  
-112   -48    
480    720    
-544   -848   
128    -880   
-32    176    
80     160    
32     64     
-272   -64    
64     0      
-352   -32    
-80    -16    
192    192    
48     64     
-32    0      
144    -640   
-96    240    
-128   16     
32     -16    
-64    208    
-16    176    
16     176    
-192   -368   
-320   -112   
128    48     
16     -32    
-160   -304   
240    0      
-160   -224   
256    -96    
-432   -656   
0      -256   
0      -256   
64     -96    
0      -64    
112    96     
-32    96     
192    112    
-240   48     
144    16     
-96    0      
320    80     
-64    208    
-256   -320   
144    0      
-224   -112   
48     0      
-240   112    
-160   0      
-272   0      
384    608    
-144   16     
-80    -160   
400    80     
-64    0      
-176   48     
-688   -304   
48     80     
-224   -64    
-304   32     
32     -336   
-96    -560   
0      -112   
80     64     
48     -32    
-256   -32    
-48    192    
128    48     
-176   0      
-64    0      
-48    224    
-448   -96    
112    96     
256    -16    
-32    64     
-48    48     
-112   -160   
48     -224   
144    96     
32     128    
-432   112    
-192   208    
-304   224    
-144   176    
-32    112    
-160   192    
-32    16     
0      32     
160    48     
288    240    
-576   80     
48     352    
-32    128    
-16    80     
-16    112    
-176   16     
-32    112    
-752   -80    
32     -80    
48     -96    
0      272    
-176   -16    
160    16     
-160   -240   
352    -96    
-80    -80    
480    160    
160    32     
-64    64     
-16    16     
96     192    
16     32     
-96    144    
64     128    
-512   -32    
-16    80     
-240   16     
-80    -96    
32     -16    
112    -16    
192    32     
-192   -16    
16     144    
-128   -48    
32     48     
96     -64    
80     192    
96     96     
32     112    
-288   -176   
-80    80     
128    -16    
-256   128    
80     64     
-112   16     
-32    32     
64     -80    
-128   80     
240    160    
-272   112    
-96    112    
224    0      
-288   -48    
16     48     
-128   -32    
64     144    
-848   -16    
160    336    
208    16     
-544   -464   
384    144    
0      96     
16     32     
-16    144    
48     80     
48     48     
-96    32     
-80    0      
208    288    
-352   144    
16     -48    
112    48     
-48    80     
16     112    
-64    272    
160    144    
-128   96     
32     -48    
-64    128    
128    32     
-160   -112   
32     144    
-32    -48    
32     96     
-64    -96    
32     -48    
-160   -176   
144    -32    
208    144    
-288   368    
-32    48     
-160   128    
48     -16    
-224   -32    
16     64     
-80    -160   
16     80     
16     32     
-128   48     
-240   -176   
64     -96    
0      160    
16     -32    
-16    48     
64     112    
0      128    
0      80     
80     -64    
192    32     
-32    112    
-112   32     
64     96     
-144   16     
-64    48     
16     32     
48     32     
-112   48     
144    112    
-208   -32    
48     0      
-144   48     
160    96     
128    96     
-224   48     
160    16     
-96    -32    
-160   -176   
16     -112   
144    112    
-272   -32    
240    -48    
0      80     
-304   -112   
64     -432   
-288   -80    
160    448    
32     -80    
-112   112    
240    432    
-96    0      
-144   -192   
224    112    
-48    -32    
64     192    
-32    224    
144    0      
80     64     
144    192    
192    80     
48     144    
16     80     
32     -64    
144    304    
-128   112    
16     192    
16     160    
-32    192    
-64    96     
64     -528   
80     448    
48     400    
-80    -16    
-32    32     
112    96     
0      -16    
64     96     
48     -32    
-96    -32    
144    -80    
80     48     
32     64     
192    96     
-176   -304   
16     -1248  
240    752    
32     448    
-240   -208   
256    384    
224    800    
-176   -64    
-48    -128   
64     256    
208    -48    
-224   -64    
400    352    
-448   672    
16     -400   
320    352    
-448   -752   
112    208    
-48    128    
160    -80    
-64    144    
48     160    
-32    -256   
-400   736    
288    -560   
32     304    
-128   608    
32     -176   
-160   -48    
80     240    
-80    0      
32     -368   
240    240    
80     -368   
144    0      
-128   -240   
192    -256   
208    272    
96     464    
48     -400   
16     112    
-160   176    
368    -176   
-32    368    
-224   -176   
96     208    
208    336    
-368   -640   
112    -352   
224    448    
32     -592   
64     16     
64     -416   
80     64     
240    0      
-176   144    
192    64     
80     128    
-96    64     
144    -64    
-192   -272   
112    -624   
-32    304    
96     336    
16     352    
48     -1296  
80     304    
128    288    
-288   -368   
144    -112   
80     -80    
32     320    
64     16     
-160   -432   
144    -352   
208    160    
32     608    
80     160    
0      -16    
128    144    
32     128    
208    208    
48     -208   
0      208    
-64    -80    
288    672    
-208   400    
112    -160   
176    112    
-96    -272   
-48    64     
-16    -240   
336    144    
16     -240   
32     80     
64     -32    
112    112    
-16    -288   
96     96     
-32    -16    
64     -48    
-192   -272   
240    -64    
-208   -368   
128    368    
0      352    
-96    -976   
336    656    
16     -80    
-80    -176   
64     -64    
48     224    
48     -320   
176    48     
224    304    
32     432    
-96    -192   
240    144    
-96    -96    
80     -192   
80     448    
208    -32    
-80    0      
96     -304   
336    176    
-16    -48    
96     -240   
48     80     
-64    -1776  
48     16     
80     -144   
80     304    
96     -448   
-80    -800   
80     -32    
336    -352   
-144   -272   
128    -48    
-32    144    
80     -48    
-64    -224   
0      -768   
160    144    
-96    -304   
-464   -448   
320    -336   
48     -208   
-1216  -80    
192    -256   
0      112    
256    128    
-160   -320   
304    -576   
-32    -400   
224    64     
-48    -112   
192    -64    
16     160    
176    -16    
-32    16     
16     0      
16     -160   
-80    240    
-112   16     
-80    -48    
208    -16    
-64    -80    
176    -448   
48     -32    
144    -1344  
-32    -64    
128    -48    
-16    160    
-128   -80    
-160   32     
224    32     
-256   -48    
64     16     
-112   16     
-96    -144   
16     128    
112    32     
112    -160   
240    448    
-272   -544   
32     144    
176    -16    
-144   80     
16     -144   
112    64     
-96    32     
144    272    
-384   -224   
-192   144    
0      -48    
-208   -176   
176    -48    
-16    32     
-128   80     
-112   -384   
80     80     
96     -656   
208    320    
-32    -16    
16     -16    
48     -176   
0      -448   
64     -176   
64     -112   
96     80     
16     32     
-560   -48    
304    -112   
240    208    
-16    -272   
64     160    
160    -1200  
224    208    
-80    64     
-96    -80    
-128   -272   
-112   -256   
112    0      
-96    -272   
-272   -80    
-16    224    
-672   -128   
32     -128   
-176   -224   
-96    -272   
48     160    
-48    -320   
-80    192    
48     -16    
16     -224   
176    32     
240    208    
48     64     
0      -32    
32     -144   
32     -32    
-528   -48    
176    32     
176    224    
-128   16     
112    112    
256    -112   
-48    -112   
-16    16     
80     32     
208    80     
-64    -64    
192    464    
-64    80     
-128   64     
64     -16    
160    48     
176    48     
-272   112    
112    -160   
112    96     
-704   -544   
-48    -32    
96     96     
-16    176    
64     64     
32     -96    
-32    32     
-32    -208   
32     0      
304    80     
-112   80     
-1472  -208   
-32    96     
-160   -240   
64     112    
-96    16     
-160   96     
64     112    
-224   16     
48     32     
64     48     
192    384    
176    48     
-96    0      
112    32     
-64    64     
-112   -96    
-48    112    
-16    96     
-64    16     
64     112    
48     96     
-224   112    
-224   -96    
-48    0      
-368   16     
160    -64    
-896   -128   
0      -96    
48     -128   
144    384    
48     64     
-16    96     
112    -112   
32     64     
-128   -32    
-128   -192   
112    -304   
192    144    
-128   272    
-288   64     
-96    16     
-768   -128   
-32    48     
16     -64    
80     192    
-128   32     
64     0      
0      -272   
-176   -176   
-96    160    
-64    0      
0      448    
-288   -48    
0      -704   
112    -320   
112    -80    
-288   -400   
144    -224   
-320   32     
48     -96    
-128   -144   
112    -320   
-160   -96    
112    -48    
-160   128    
80     0      
16     -48    
-112   160    
-48    -16    
0      -16    
-96    496    
-48    224    
0      -112   
-192   -160   
32     80     
-16    -96    
-48    176    
160    128    
-48    -144   
-32    -16    
176    352    
-160   672    
-48    -352   
160    144    
-240   -112   
80     -752   
384    256    
0      192    
-416   640    
-128   128    
240    -112   
32     -16    
176    64     
-64    128    
304    288    
-304   336    
-48    -480   
16     16     
128    736    
16     -112   
-96    -432   
-96    80     
-160   32     
16     -256   
32     -224   
240    208    
48     176    
-144   -112   
112    224    
-432   -112   
32     400    
16     64     
-32    80     
32     128    
-160   -160   
160    112    
-176   -96    
112    80     
-176   16     
80     112    
256    208    
-16    272    
160    80     
-256   0      
144    160    
208    -32    
128    -160   
-256   -144   
112    -16    
-400   48     
-64    96     
-48    288    
96     160    
-208   32     
-176   -80    
-32    32     
-128   -80    
0      32     
-208   144    
-48    -112   
128    64     
-144   -288   
128    320    
224    624    
-224   288    
64     -144   
-368   -480   
144    -96    
-160   896    
16     496    
64     -624   
-64    640    
-80    96     
32     -144   
-48    672    
256    96     
-400   -48    
496    256    
-480   384    
160    -16    
0      -208   
-176   -32    
320    -304   
-192   -368   
272    288    
64     96     
64     -96    
-160   384    
96     -560   
112    368    
16     64     
160    48     
48     288    
16     -256   
-64    -80    
240    64     
-224   96     
128    0      
16     112    
64     112    
48     48     
48     112    
96     224    
-32    272    
-32    -128   
160    624    
-112   -224   
-16    -1600  
464    288    
-112   592    
-16    -400   
0      704    
112    -64    
-256   -16    
128    576    
96     -896   
32     560    
64     512    
-112   -176   
32     48     
16     -48    
-32    -16    
0      144    
-16    224    
48     -176   
96     624    
-32    -96    
256    -1072  
-192   -144   
16     -16    
96     176    
-240   48     
256    448    
32     288    
-192   0      
-32    16     
0      80     
0      0      
0      80     
48     96     
64     96     
-112   0      
480    144    
-480   -256   
128    48     
240    -32    
-144   -16    
224    96     
336    208    
-240   176    
-48    96     
272    176    
-176   -96    
-80    -160   
48     -32    
128    -208   
-160   -144   
240    -224   
-96    336    
-48    -336   
16     160    
64     16     
48     0      
144    -48    
0      32     
80     96     
-48    240    
16     64     
64     64     
0      48     
-16    64     
128    64     
48     -128   
128    96     
32     -208   
-224   16     
304    48     
-352   112    
128    192    
-32    112    
128    -368   
-32    64     
-16    -96    
16     96     
128    64     
80     -16    
112    80     
-160   -144   
416    96     
-144   -304   
112    96     
-32    -656   
0      160    
-16    -192   
384    288    
112    128    
-80    112    
176    -112   
-160   48     
128    32     
-208   -272   
144    -304   
-16    -128   
128    160    
96     192    
-48    80     
48     -112   
48     64     
80     -672   
96     208    
-128   128    
-64    144    
80     80     
-32    80     
144    176    
64     -48    
-144   -64    
288    -592   
-160   32     
336    -32    
112    224    
-48    -416   
400    288    
-352   16     
96     256    
-128   112    
64     48     
32     -144   
80     -112   
304    96     
48     -176   
336    320    
-80    64     
-144   256    
-144   -304   
-128   -144   
-256   -784   
-16    -720   
16     -496   
176    272    
-96    256    
288    112    
-304   160    
208    416    
-16    432    
16     -128   
-48    -224   
80     -224   
256    160    
64     -32    
112    64     
64     -112   
160    240    
64     48     
-64    560    
-16    -272   
80     -272   
-112   -1968  
176    -32    
80     -496   
160    -32    
-64    -1808  
-48    -192   
320    208    
16     -16    
-176   16     
400    96     
400    160    
-112   96     
16     -400   
32     64     
304    -64    
-160   -16    
-160   -16    
192    -256   
-64    -128   
80     -352   
-144   -48    
16     -64    
16     -48    
48     48     
368    80     
-464   -256   
160    112    
112    -16    
144    96     
-112   -112   
32     -80    
-736   -64    
-80    -336   
160    32     
96     -288   
-96    -32    
144    32     
-224   32     
192    -416   
288    16     
-32    -48    
0      112    
80     -32    
16     80     
-272   -144   
128    -64    
-224   -128   
48     -128   
-16    -64    
64     -144   
64     -208   
160    -192   
32     32     
112    -1504  
128    224    
-192   16     
96     64     
48     -160   
32     16     
32     -16    
16     64     
80     48     
-48    -16    
-384   0      
128    0      
-32    -128   
48     -144   
-96    96     
112    -80    
-32    48     
16     32     
208    16     
-112   -176   
256    48     
192    0      
-176   -96    
80     -112   
-48    -32    
16     0      
-32    -64    
-192   64     
-112   16     
272    16     
-160   -112   
352    -160   
-224   -128   
48     -144   
192    32     
48     464    
128    528    
48     112    
-128   176    
80     -32    
-96    -320   
224    176    
-560   288    
48     144    
32     256    
112    -320   
-48    -144   
0      -384   
48     240    
-112   -64    
80     -224   
0      224    
-32    -112   
-160   -176   
-16    64     
-400   -192   
480    -112   
-816   304    
128    -736   
224    608    
240    208    
128    544    
112    0      
32     -832   
160    -32    
96     112    
-80    32     
32     0      
16     192    
-48    0      
48     0      
-128   -144   
-160   16     
32     -208   
96     -32    
-64    176    
256    128    
32     -272   
-64    -64    
-112   -48    
-16    16     
-64    48     
0      -96    
-96    256    
144    576    
-208   96     
112    -48    
-80    -48    
80     -192   
32     128    
-384   -400   
352    -112   
-560   -32    
64     80     
0      64     
160    96     
32     16     
-656   -16    
112    -48    
-272   -528   
-80    -384   
64     0      
-480   -208   
0      -528   
-208   -128   
-288   -336   
256    16     
-160   32     
-48    -96    
-288   0      
112    16     
-16    144    
-368   16     
-96    -192   
-32    0      
-48    -112   
112    -112   
-112   -160   
-48    0      
-112   80     
80     -80    
48     224    
96     304    
96     624    
144    512    
-64    288    
-208   288    
0      -96    
-80    -272   
-416   16     
48     384    
-64    160    
144    64     
-416   -784   
160    -176   
-80    -128   
-304   -64    
64     176    
-48    -32    
-64    272    
-144   112    
-368   352    
96     32     
-112   16     
-80    -128   
-272   384    
16     -80    
-128   -32    
-128   240    
400    -112   
-80    272    
-272   -416   
160    -208   
-160   -432   
-160   544    
160    48     
-192   48     
-112   400    
336    80     
-640   -192   
288    48     
-624   -112   
1120   752    
-800   240    
288    -1104  
96     640    
32     256    
-16    -400   
-128   16     
-48    0      
-96    16     
-32    176    
-176   -256   
-80    880    
224    256    
-304   -320   
-32    -32    
80     336    
-64    144    
-144   -448   
-160   -304   
80     352    
-80    400    
-32    320    
-32    96     
-144   48     
112    144    
-80    256    
96     -64    
-16    -240   
208    368    
-96    160    
-128   -240   
-176   464    
0      608    
-144   112    
-96    -64    
176    -32    
-80    0      
368    576    
-272   320    
192    176    
128    176    
-16    128    
-208   -32    
144    256    
-80    -16    
48     160    
192    160    
-48    224    
-96    368    
-96    256    
64     128    
-192   -32    
224    0      
-80    48     
-64    16     
48     -48    
-144   -112   
-144   -64    
144    80     
-256   -64    
144    -48    
-160   16     
-128   64     
-48    32     
48     112    
16     256    
16     208    
-16    -32    
16     80     
48     -80    
-304   -16    
224    112    
-208   32     
112    112    
-208   32     
16     16     
-224   -144   
96     -96    
64     96     
0      48     
-32    0      
32     -64    
-64    144    
64     32     
-32    144    
-64    -16    
-16    144    
-208   -32    
144    -96    
0      -32    
96     272    
-32    0      
32     0      
80     128    
176    96     
-128   64     
16     80     
-16    32     
-32    288    
48     96     
-160   48     
144    -16    
-112   48     
224    80     
-64    96     
48     80     
32     112    
240    48     
-176   80     
-80    -80    
16     -176   
0      -112   
208    -112   
48     -32    
112    80     
-16    -80    
96     0      
0      -176   
0      144    
64     304    
96     304    
-32    80     
-32    144    
-32    128    
-64    -48    
224    -16    
144    176    
0      224    
-64    -16    
48     144    
-48    -48    
96     192    
128    96     
-208   -192   
96     80     
-192   -16    
-32    144    
-16    0      
-192   0      
288    48     
-176   240    
-48    -80    
-176   48     
-80    16     
-32    48     
272    256    
-240   272    
-144   -16    
96     -544   
224    64     
-128   -80    
32     64     
96     144    
16     256    
-32    160    
80     48     
64     -16    
-160   -32    
-16    80     
32     -272   
-48    -480   
192    96     
144    176    
-128   -272   
208    48     
-64    96     
112    192    
-80    176    
128    96     
-128   176    
160    96     
-128   16     
64     144    
144    80     
-16    0      
48     -96    
-128   80     
160    -48    
0      -272   
224    144    
48     -448   
-32    112    
288    112    
16     64     
48     176    
192    80     
-64    -176   
288    128    
-48    -208   
64     144    
80     -32    
112    -48    
160    112    
-64    -32    
-16    16     
144    -304   
96     0      
80     -224   
112    208    
192    432    
-192   160    
-64    160    
240    128    
-32    32     
-96    -64    
256    -80    
80     96     
176    64     
96     -48    
16     96     
16     16     
64     112    
32     80     
64     112    
64     224    
-48    64     
-32    -80    
176    256    
-160   192    
-96    -32    
112    128    
192    -16    
-48    112    
224    80     
-192   288    
80     -48    
224    80     
-96    -272   
48     112    
112    -912   
-64    16     
128    16     
-80    -160   
112    32     
32     112    
48     -32    
64     -336   
48     64     
96     -48    
112    32     
16     -128   
16     32     
128    -624   
-16    32     
80     -320   
48     0      
192    -64    
304    1168   
-224   432    
64     -1328  
304    752    
0      80     
-16    -208   
16     192    
192    96     
32     -112   
-16    64     
0      -80    
80     80     
48     32     
32     -80    
32     16     
80     -896   
256    288    
-464   -960   
320    -368   
-224   -224   
272    -672   
-80    16     
0      208    
0      -48    
32     64     
48     -224   
96     -464   
224    128    
-48    -448   
192    -32    
-224   -768   
112    -480   
-320   112    
96     224    
16     -80    
16     -304   
128    -80    
96     32     
48     -32    
-32    -144   
80     -176   
320    -64    
-192   32     
32     -480   
32     -160   
-16    -368   
144    -208   
-512   -48    
80     256    
-16    48     
16     -320   
112    144    
-192   -400   
-80    -336   
112    -48    
48     -32    
16     -80    
-96    112    
96     -16    
272    192    
-368   96     
288    -96    
-432   -16    
160    -128   
-80    -32    
128    -64    
-48    16     
80     -80    
608    336    
-288   192    
0      256    
64     -64    
96     160    
208    16     
-64    64     
-192   -320   
128    -368   
-256   -48    
112    80     
-800   304    
-96    464    
192    112    
32     16     
-144   -304   
208    -336   
-32    -240   
464    -144   
-32    16     
16     -224   
320    -48    
-112   96     
272    32     
256    -32    
48     272    
-976   48     
-48    -144   
96     -64    
-96    -16    
176    80     
144    -16    
224    464    
32     -1808  
-48    80     
-32    -176   
160    -64    
-16    -80    
-48    -176   
-176   -208   
560    -208   
-640   240    
256    32     
-400   -160   
64     144    
-32    -80    
64     -576   
-144   -128   
240    144    
-16    656    
272    224    
-512   -944   
224    -16    
-48    -64    
-128   -16    
64     -96    
-32    224    
-272   -160   
160    -640   
16     144    
192    -96    
64     -64    
448    752    
-112   416    
80     16     
80     -208   
-80    368    
-176   336    
432    304    
-752   -384   
-96    -480   
-176   -736   
-112   -352   
-32    -288   
288    -128   
-96    -192   
32     -112   
464    192    
224    -224   
96     -96    
-96    416    
288    752    
-336   528    
48     208    
-144   32     
176    64     
-208   304    
304    16     
-432   -64    
96     -80    
-16    96     
-176   -96    
-128   -64    
-1424  -224   
-400   -80    
-144   176    
-560   192    
-80    -48    
-80    -128   
-304   -496   
0      -160   
32     80     
-48    160    
-48    48     
-192   -80    
160    112    
-336   -96    
0      240    
208    64     
-16    48     
0      240    
-16    96     
-64    -64    
-464   32     
16     96     
16     48     
16     80     
-160   -96    
32     32     
96     0      
224    208    
-112   -208   
-96    96     
128    80     
-208   80     
48     64     
-96    16     
-160   48     
-144   48     
-16    48     
0      64     
0      208    
112    -128   
-128   16     
-80    -64    
-16    96     
-144   -128   
288    160    
-288   80     
96     48     
-64    -448   
-128   32     
48     -32    
-144   128    
224    240    
-128   48     
0      128    
-208   -96    
80     48     
-256   -80    
144    128    
-32    48     
-16    64     
96     -64    
-112   -160   
64     32     
80     32     
16     -16    
-32    16     
96     0      
-240   -208   
-48    48     
-256   -32    
-128   96     
80     0      
144    112    
176    256    
-368   48     
-32    64     
-224   -32    
64     128    
16     -16    
-48    32     
-160   -32    
-112   32     
-32    -48    
32     64     
-96    160    
-240   112    
-16    -112   
64     176    
-240   224    
32     192    
-224   32     
-16    0      
96     0      
-32    48     
-16    -80    
-16    32     
-224   -64    
-112   -48    
144    16     
-192   -96    
96     -32    
-640   -208   
0      -64    
-32    112    
208    96     
-32    96     
-112   96     
-112   -176   
-96    -160   
96     160    
-128   48     
-96    80     
-48    -32    
176    176    
-80    144    
-64    16     
-448   -80    
48     176    
32     64     
-96    -32    
176    64     
-32    32     
-48    -32    
32     80     
48     176    
-64    64     
-112   96     
-208   -16    
0      48     
-160   -32    
96     112    
0      48     
64     496    
192    272    
0      -64    
96     160    
-112   -32    
144    16     
-112   128    
240    16     
-128   48     
144    48     
48     32     
32     192    
48     48     
240    48     
-144   208    
64     96     
0      112    
0      32     
16     16     
-256   -272   
272    16     
48     112    
-240   -80    
96     0      
192    304    
-32    0      
48     192    
64     240    
-80    32     
0      -48    
144    16     
32     48     
-80    176    
144    80     
-160   -16    
0      112    
-112   0      
-32    32     
96     160    
-144   160    
-112   -64    
80     32     
96     112    
-352   -160   
304    96     
160    160    
32     64     
-32    80     
112    32     
96     176    
-192   64     
-144   -32    
176    -96    
32     0      
80     64     
96     -32    
-192   64     
160    48     
-16    128    
128    -32    
-192   160    
48     64     
-176   80     
128    48     
176    128    
-48    160    
-112   96     
0      64     
96     -160   
160    96     
0      224    
432    -272   
-176   128    
64     80     
-32    80     
208    128    
-112   160    
16     192    
160    400    
64     48     
-32    208    
-128   128    
160    336    
-32    176    
368    512    
-224   304    
48     -640   
96     432    
208    208    
0      208    
144    16     
32     128    
-64    304    
96     -304   
-16    240    
48     32     
-32    112    
96     80     
32     160    
208    32     
-96    224    
144    0      
32     -64    
-192   -688   
176    0      
240    432    
-208   96     
80     48     
304    64     
-288   64     
144    80     
16     -48    
80     80     
64     48     
64     128    
32     48     
-16    -368   
16     96     
48     -640   
144    224    
0      160    
-176   16     
-32    144    
112    160    
64     224    
-16    96     
-112   192    
-176   -192   
192    -320   
48     -80    
-48    160    
288    -208   
-16    16     
224    -128   
0      176    
192    -192   
-80    80     
48     64     
-16    32     
64     64     
16     128    
-112   176    
48     64     
-160   -64    
32     176    
144    176    
-32    -32    
32     64     
176    -96    
48     224    
64     -464   
96     592    
336    432    
0      448    
-80    640    
176    352    
-256   -112   
144    160    
-80    32     
96     -64    
144    160    
288    16     
-240   240    
-16    -576   
128    0      
-64    -224   
144    112    
-96    -768   
144    96     
-80    -16    
304    592    
128    784    
-224   448    
224    -80    
48     -208   
240    144    
-16    -16    
192    240    
128    -16    
-80    64     
-80    -64    
80     -96    
-288   -1104  
160    208    
96     544    
-96    96     
-112   -160   
16     -528   
96     320    
336    336    
576    240    
80     192    
-160   400    
512    -224   
-32    144    
336    -112   
0      320    
-16    -208   
176    864    
-96    -224   
176    -96    
-272   -48    
176    -192   
208    1376   
-48    288    
192    64     
-32    208    
-48    128    
16     -416   
224    304    
-16    208    
64     592    
128    256    
48     -640   
16     144    
32     -528   
-16    -480   
-528   -176   
224    16     
48     -96    
192    64     
-160   192    
128    -416   
128    -112   
176    128    
32     -160   
144    -112   
304    208    
-224   -320   
144    48     
-112   -368   
16     -368   
-256   -160   
-96    -208   
64     64     
-176   -688   
320    16     
80     -224   
32     -96    
64     112    
64     288    
-368   144    
128    -64    
-64    -208   
48     48     
-240   0      
80     48     
-208   -144   
96     -144   
-16    -224   
-176   -176   
400    -256   
0      16     
256    -112   
-160   -256   
336    -48    
208    -112   
-288   80     
160    -64    
112    64     
48     0      
-128   -48    
-240   16     
128    80     
-496   -144   
-32    -48    
192    80     
-144   -96    
80     16     
112    -272   
-32    -128   
208    80     
176    16     
48     -48    
128    0      
-16    -16    
-16    -176   
160    80     
-96    -192   
-112   0      
32     128    
80     -16    
0      -240   
-176   -32    
208    -64    
-208   0      
96     -816   
160    96     
-176   112    
144    -48    
-112   16     
80     -160   
32     80     
48     16     
-672   -48    
-32    -208   
-112   -16    
-80    -160   
48     -208   
112    -464   
-32    -64    
176    -880   
96     128    
-80    -96    
160    16     
48     80     
32     16     
-48    32     
-176   -224   
32     -176   
-176   32     
-160   -32    
-16    -48    
144    96     
80     -80    
-160   -80    
288    -368   
208    96     
-128   144    
80     0      
-80    64     
256    -144   
-304   32     
144    -16    
-160   48     
176    -16    
144    64     
16     32     
48     -16    
416    160    
-240   160    
64     32     
112    -112   
-48    80     
64     -64    
-304   32     
-64    -352   
-16    -64    
112    0      
-288   -96    
208    144    
-224   32     
-48    -48    
160    64     
-80    -32    
32     32     
-576   0      
-480   -416   
0      32     
464    192    
-592   16     
112    112    
208    128    
-144   32     
64     32     
-80    -16    
-224   -48    
-1488  -96    
240    80     
-128   -80    
-112   16     
160    -32    
-560   32     
304    144    
-400   160    
-112   64     
-32    48     
80     112    
80     -48    
-144   160    
-144   80     
128    0      
16     32     
144    112    
-352   -96    
192    32     
-80    -80    
-112   32     
112    240    
-528   176    
48     -32    
-336   -96    
64     48     
-752   -16    
-144   32     
240    48     
16     48     
-16    -112   
80     80     
80     -240   
-144   192    
96     80     
-128   112    
112    96     
-224   -16    
96     96     
16     16     
-128   -64    
32     160    
32     112    
-16    0      
32     96     
-96    -96    
96     80     
32     32     
-48    32     
80     192    
-176   0      
16     48     
-480   -816   
-48    -448   
272    64     
-32    224    
-48    16     
-304   -144   
-1264  -320   
64     -32    
176    -32    
-160   32     
80     48     
-64    -96    
304    624    
-336   544    
-368   96     
144    -80    
256    48     
-304   -32    
-16    96     
112    368    
-160   320    
-1216  -192   
32     0      
160    -64    
144    240    
-288   80     
-32    64     
-112   -80    
160    224    
-304   -448   
368    -400   
160    -304   
112    -64    
112    -48    
-160   -16    
48     -48    
-336   -400   
-112   -192   
224    16     
-96    320    
320    400    
48     672    
224    736    
-128   32     
0      64     
-48    -144   
64     16     
-144   -48    
48     176    
48     16     
-128   80     
0      -16    
-16    -112   
-352   16     
-192   240    
-208   -176   
192    -128   
592    880    
-416   192    
-384   -288   
400    32     
-256   64     
0      16     
16     -144   
0      -80    
-96    0      
-352   -672   
16     0      
304    448    
-80    144    
16     -32    
112    160    
0      288    
-96    48     
16     128    
80     480    
80     -304   
-80    -400   
128    288    
-32    -208   
0      144    
-48    80     
128    96     
-16    224    
96     448    
64     32     
-48    32     
240    224    
-304   336    
-32    272    
112    -208   
0      112    
-368   64     
272    32     
-336   0      
96     80     
-128   -16    
128    64     
-32    112    
0      32     
128    48     
-80    64     
16     64     
16     64     
336    368    
-176   432    
-48    288    
-192   64     
320    112    
-160   -64    
288    176    
-208   -64    
-16    128    
128    192    
-240   160    
192    80     
16     176    
240    112    
-464   -480   
336    -304   
176    256    
0      176    
64     96     
16     80     
16     64     
80     96     
-144   -128   
208    -240   
-32    128    
128    320    
80     96     
48     144    
-48    80     
32     112    
-112   128    
96     -16    
32     0      
-240   -80    
160    -768   
16     -768   
80     -304   
48     -96    
96     80     
112    240    
32     112    
32     176    
-112   96     
-80    16     
128    368    
-32    96     
-80    -80    
96     0      
-144   32     
96     112    
-144   -272   
0      -272   
32     -480   
128    400    
192    608    
-336   -880   
416    -112   
-48    416    
0      -432   
160    192    
64     224    
-256   -560   
288    272    
48     720    
64     -16    
16     0      
160    -128   
-208   -96    
-96    -320   
176    -16    
-48    32     
112    128    
96     384    
-80    528    
0      64     
128    384    
80     272    
32     304    
-16    96     
144    224    
-48    48     
-80    -816   
-112   -192   
64     -2416  
-64    -432   
-176   -352   
352    176    
-272   256    
16     240    
-96    80     
240    208    
-176   -224   
464    160    
-416   -352   
112    -96    
224    128    
32     -48    
-48    -16    
80     -320   
240    128    
-48    -32    
112    80     
-208   -480   
48     224    
-96    -80    
-144   80     
112    96     
80     192    
-112   -16    
16     48     
-272   -48    
384    48     
-64    48     
160    -320   
-96    48     
128    -720   
-48    0      
16     -112   
32     144    
208    128    
-416   64     
224    0      
32     288    
16     -128   
-64    32     
224    64     
-128   16     
-32    48     
32     -64    
400    304    
-64    -640   
64     0      
64     -368   
-32    -112   
0      16     
128    80     
-272   48     
96     96     
-192   112    
192    0      
48     240    
-144   -384   
96     96     
-16    -128   
80     96     
32     -96    
64     48     
48     112    
-16    16     
-96    48     
272    256    
-112   176    
128    288    
-160   112    
32     -176   
80     112    
96     -128   
16     -32    
-80    -112   
144    0      
-48    -64    
192    96     
96     112    
-96    48     
128    48     
208    96     
16     0      
64     -16    
144    304    
-112   -240   
128    48     
48     -176   
-32    48     
224    80     
-160   80     
48     -128   
192    112    
64     0      
48     -64    
64     128    
144    -944   
-32    96     
-64    -256   
-16    48     
160    16     
48     -240   
-64    -32    
80     176    
80     -96    
160    160    
-80    -368   
112    -752   
32     48     
208    -432   
-208   80     
-16    -256   
208    -384   
-1008  -64    
-80    -80    
576    192    
-224   -352   
0      -224   
208    -384   
-32    -16    
-16    96     
-48    -160   
112    -32    
-128   -112   
112    -176   
144    80     
-304   -112   
0      -208   
-128   32     
64     -64    
-16    64     
144    -304   
-80    -80    
240    144    
-176   32     
96     256    
192    -192   
80     -192   
-144   96     
160    -192   
48     32     
-96    -32    
144    16     
-208   -80    
-48    -176   
144    -48    
-112   -144   
304    -288   
48     -80    
112    64     
48     -672   
176    160    
288    -48    
-192   192    
176    -32    
-208   -16    
0      64     
-80    -224   
32     -80    
16     -320   
-96    -32    
240    -112   
32     -48    
96     -80    
16     -32    
-208   -896   
512    112    
-16    208    
96     48     
96     64     
-112   -80    
144    -128   
-32    -48    
-144   96     
208    -16    
128    160    
-112   112    
-304   144    
64     -80    
-208   -160   
64     -384   
112    32     
-16    -432   
0      16     
224    96     
-128   96     
-32    16     
16     -32    
160    16     
240    336    
-224   624    
-176   224    
-368   -64    
208    272    
16     432    
-48    -128   
128    48     
208    -368   
-96    -48    
-16    64     
48     -16    
32     -16    
160    144    
-304   208    
112    64     
-80    80     
-272   -432   
128    -528   
-32    272    
208    272    
96     -64    
192    320    
-80    -400   
48     80     
-16    144    
-128   -80    
-288   224    
80     -256   
-160   -288   
-112   -224   
-64    128    
512    368    
-176   448    
-16    -224   
144    -16    
96     -352   
0      -208   
-64    -320   
112    48     
96     48     
240    80     
-288   160    
128    -16    
96     208    
-80    384    
-288   144    
16     -720   
0      192    
-1056  16     
0      -112   
-128   -224   
176    496    
-400   -48    
-96    -928   
-160   -208   
-240   304    
-352   -272   
224    -176   
-32    272    
112    32     
192    48     
-64    -80    
96     224    
-176   48     
-256   -352   
128    208    
128    288    
-128   -272   
-48    224    
-144   16     
-384   -48    
-272   -32    
16     96     
-112   32     
-272   -144   
240    80     
-80    -32    
-16    96     
96     -32    
0      48     
0      0      
-80    160    
272    16     
-96    32     
-144   -320   
-16    64     
240    416    
-32    240    
-336   -48    
-512   -368   
-96    64     
-128   -160   
320    32     
-352   336    
464    688    
96     624    
16     304    
96     144    
-80    496    
128    368    
-176   -288   
-80    -352   
-368   -528   
80     -64    
-256   -336   
96     176    
240    128    
-64    176    
-144   -368   
368    32     
-240   96     
80     16     
64     144    
-144   -64    
16     96     
-128   -32    
-32    64     
-96    -16    
0      80     
-64    48     
16     80     
-352   -160   
-272   176    
96     80     
-176   48     
-80    -752   
80     -160   
32     288    
-160   160    
48     256    
-144   464    
-144   -336   
-192   -704   
96     -48    
-400   16     
32     400    
-144   -48    
-80    112    
48     32     
-96    -176   
32     320    
-48    112    
-112   256    
112    64     
-48    432    
-176   -32    
368    624    
-368   144    
-128   -528   
-80    0      
96     -48    
-160   128    
432    848    
-1184  1136   
-128   272    
16     -1056  
304    224    
-128   256    
-16    48     
-80    64     
-80    -32    
272    112    
-320   -96    
-48    -16    
-144   -816   
416    400    
-96    304    
32     -64    
-112   64     
112    32     
-128   -96    
16     -16    
-32    32     
-32    144    
48     224    
-80    -416   
128    -320   
-160   32     
176    -48    
96     112    
144    176    
-48    192    
96     304    
-32    128    
16     64     
32     80     
-16    96     
-48    -48    
-16    -32    
-48    80     
32     112    
80     16     
16     0      
304    528    
-544   -112   
160    192    
-96    336    
-96    96     
32     80     
176    160    
16     -16    
-80    -48    
0      -160   
96     -32    
-112   240    
-192   64     
256    16     
-64    96     
144    256    
-480   -80    
128    144    
-16    0      
128    128    
-32    16     
-96    -560   
0      -144   
160    208    
-160   128    
16     80     
16     32     
48     -128   
256    32     
16     80     
208    160    
-272   -16    
112    112    
96     208    
32     128    
80     160    
-96    -64    
64     -144   
32     -144   
-32    -272   
272    80     
-96    160    
16     112    
-96    48     
16     -32    
128    288    
16     80     
-240   48     
64     176    
-176   -112   
176    -208   
432    272    
304    -160   
-384   -144   
0      -96    
0      -16    
-144   -32    
48     -32    
96     128    
96     160    
16     64     
128    -128   
-192   -400   
144    192    
-240   96     
32     96     
0      256    
208    256    
-48    240    
64     224    
64     112    
-48    -48    
176    -32    
64     144    
112    64     
-48    64     
-80    -80    
128    -16    
-112   64     
16     -32    
288    -32    
80     128    
128    64     
-16    96     
112    64     
-96    64     
320    256    
-176   48     
48     192    
32     -176   
-128   48     
160    80     
-80    -64    
80     48     
32     -400   
144    64     
208    96     
-128   272    
-96    48     
-144   224    
288    304    
160    48     
-304   -400   
224    112    
-32    -16    
-32    96     
64     112    
224    -32    
-224   96     
48     -592   
64     64     
176    128    
16     96     
-16    -16    
80     64     
32     0      
224    208    
80     48     
128    240    
-80    -32    
64     -64    
112    96     
48     -128   
-96    96     
16     -224   
16     112    
0      -304   
272    96     
-256   48     
288    160    
240    64     
-160   -16    
144    48     
112    80     
-160   32     
64     -112   
16     176    
0      -128   
32     128    
-16    -144   
32     -16    
112    -1424  
16     96     
32     -1552  
16     80     
-16    64     
112    16     
80     16     
48     16     
32     80     
112    -48    
112    48     
32     -16    
-32    16     
112    -576   
-16    48     
-80    -928   
96     32     
192    112    
48     256    
-80    192    
112    192    
64     32     
128    48     
176    64     
48     -208   
112    -80    
-112   -32    
224    48     
-16    -176   
368    256    
-160   144    
-304   0      
240    368    
96     0      
-144   -176   
-80    -240   
-160   -208   
32     -96    
144    96     
112    -32    
48     96     
16     -32    
-16    -208   
48     -240   
48     -96    
-48    160    
-96    -304   
-64    -592   
144    832    
-384   -528   
192    -800   
-272   48     
64     -192   
224    -928   
-112   -224   
-64    -816   
112    -32    
64     128    
-192   -352   
432    400    
-112   0      
224    -432   
16     32     
0      -272   
160    -64    
80     -144   
0      -768   
-176   64     
176    -400   
-160   -208   
32     -432   
32     -16    
64     -1808  
0      -192   
80     144    
-144   -32    
48     -448   
64     -48    
224    64     
0      176    
96     48     
96     -96    
-912   -112   
-144   -688   
336    672    
-320   32     
224    -192   
-128   -800   
192    -320   
64     304    
-48    -80    
256    96     
-176   -80    
160    -192   
-336   144    
-256   -128   
176    -32    
-240   -208   
16     0      
-32    0      
352    -352   
224    208    
896    400    
0      816    
336    -144   
-400   -240   
224    -480   
784    480    
-432   48     
400    -432   
96     352    
-96    -64    
240    -240   
-48    -112   
-928   -480   
704    480    
-432   368    
-112   -704   
304    -96    
272    -80    
32     64     
192    32     
-48    64     
-96    192    
224    -768   
-160   -192   
272    144    
-240   -576   
80     -96    
-464   464    
240    560    
-192   176    
-80    -304   
-96    -16    
32     -896   
-224   -96    
432    -1376  
160    144    
-128   64     
240    16     
-112   -112   
0      -144   
224    320    
-32    416    
-416   144    
-64    -544   
-432   -592   
368    384    
-160   336    
32     -240   
272    -32    
-160   -368   
-48    -144   
160    -176   
-80    432    
80     -400   
-128   -992   
304    896    
32     -48    
-144   112    
96     -192   
-448   -320   
384    336    
-16    416    
-256   -640   
-80    -1344  
240    -592   
480    1216   
-608   848    
-96    -560   
128    -80    
-128   -64    
-64    -32    
-112   -64    
-224   -112   
0      -32    
-128   96     
32     -112   
32     48     
80     -128   
-80    96     
-48    -112   
384    -96    
-464   -80    
400    336    
-16    0      
64     -256   
-32    192    
0      96     
-64    0      
208    0      
-208   48     
144    -528   
-32    192    
-1664  -96    
336    320    
-416   -144   
-112   -96    
0      208    
-336   48     
112    -288   
-208   -192   
240    384    
80     144    
112    224    
-32    64     
-80    -48    
-464   -576   
48     0      
-336   -224   
-16    32     
48     336    
16     112    
-288   64     
-368   -128   
-240   -96    
-272   -304   
-96    128    
-48    48     
-224   -32    
144    -192   
-112   -16    
-256   -144   
32     272    
-256   -368   
464    -320   
-160   32     
16     -48    
-16    48     
-16    112    
48     80     
-48    80     
0      48     
-912   32     
-80    -32    
-160   -112   
-160   16     
32     -64    
0      96     
-64    -16    
-48    96     
-32    96     
-96    -32    
-16    -16    
208    0      
112    384    
-384   48     
96     -32    
-464   32     
144    -16    
-64    -16    
224    272    
-128   144    
16     32     
-80    -64    
-208   96     
336    0      
-192   128    
48     0      
-96    -16    
-80    80     
32     112    
-240   0      
0      -16    
-96    48     
-48    -16    
32     128    
-16    -160   
64     160    
128    64     
32     48     
-16    128    
48     192    
-112   144    
48     96     
-352   -800   
-288   -656   
256    -128   
-352   -352   
32     80     
-80    288    
-16    128    
-224   -352   
32     176    
0      176    
-96    80     
160    -16    
208    0      
48     272    
-96    96     
16     128    
-144   256    
-224   224    
-320   -112   
-128   -48    
-608   -144   
256    160    
-224   -48    
-64    -32    
48     32     
-224   -16    
256    112    
-416   -48    
-48    128    
240    -192   
-176   -128   
-64    -144   
-80    176    
64     96     
-96    48     
-112   -96    
-32    0      
64     80     
-144   80     
-48    16     
48     -112   
80     -16    
-32    208    
-16    112    
-112   64     
240    -32    
-224   80     
96     240    
-224   80     
-96    -176   
32     32     
48     96     
-176   0      
160    80     
16     80     
0      128    
64     16     
-64    64     
80     176    
-368   64     
-64    -112   
-112   0      
208    112    
-160   -16    
176    -48    
-96    -384   
-176   -240   
176    128    
-64    224    
-64    96     
-128   48     
112    112    
-80    32     
-80    32     
128    48     
-32    -48    
-112   -16    
80     112    
224    368    
-288   288    
-160   -64    
144    96     
80     80     
16     64     
48     112    
80     192    
64     0      
32     64     
128    144    
176    272    
-32    272    
-64    -32    
0      80     
-80    -16    
-64    80     
80     96     
128    112    
-160   -176   
16     -256   
96     80     
-16    112    
-80    48     
16     64     
384    96     
-352   112    
64     -16    
-96    16     
176    256    
-144   -96    
0      0      
96     -48    
80     48     
112    208    
-80    208    
144    304    
-112   256    
-32    384    
16     144    
-112   32     
-240   -112   
128    -112   
-176   -352   
48     -512   
-64    -208   
-48    -800   
0      32     
160    208    
0      -48    
80     160    
64     128    
80     32     
80     160    
-32    48     
-16    0      
48     -144   
48     80     
16     0      
-96    -48    
-240   -512   
80     -1248  
176    192    
16     336    
128    96     
112    160    
32     -128   
-80    112    
32     368    
-48    224    
80     -80    
-144   -400   
112    528    
-80    -432   
-112   -80    
336    16     
-144   -528   
160    112    
-240   -1392  
288    -368   
32     336    
-224   -400   
160    -16    
-16    160    
96     176    
48     48     
-48    -432   
80     320    
96     -224   
-64    128    
112    368    
-32    -64    
32     48     
-144   -1280  
-96    -176   
240    -208   
16     -112   
304    48     
80     304    
176    800    
240    288    
-624   -240   
0      -272   
-80    0      
-80    128    
704    320    
-512   -352   
32     -368   
416    48     
160    608    
128    96     
128    -16    
32     -48    
240    -48    
-128   -192   
336    -336   
64     -128   
-64    -32    
96     80     
144    -96    
592    144    
-256   -48    
416    80     
48     -80    
32     304    
256    -336   
-80    224    
176    80     
-112   352    
-96    -16    
48     112    
48     -128   
-192   -16    
208    -144   
16     144    
176    144    
-160   -128   
128    80     
64     -256   
-272   -656   
144    -832   
192    512    
-64    -96    
160    -80    
96     32     
192    0      
-64    -160   
96     128    
-208   384    
352    -176   
32     96     
-192   -256   
576    96     
-96    288    
400    272    
208    528    
32     16     
48     -96    
448    -544   
176    128    
48     720    
16     -432   
272    -416   
176    560    
-64    -272   
240    464    
176    -224   
240    576    
96     -352   
384    1440   
-592   -784   
384    -320   
80     -464   
-432   -336   
16     -1040  
160    672    
96     192    
-272   -32    
560    -608   
-208   -144   
400    192    
-224   -208   
208    208    
80     -160   
-112   208    
-64    -208   
160    128    
-128   -496   
-32    -688   
176    176    
-176   512    
240    -960   
0      368    
-160   -512   
-96    -448   
112    -1232  
64     -240   
-160   -160   
304    160    
-176   -192   
112    -192   
-48    160    
112    80     
-80    -32    
384    448    
-320   432    
16     -624   
-512   -192   
64     -80    
-32    -192   
240    -224   
-48    48     
48     -752   
32     -352   
48     -32    
96     -96    
-144   -112   
-16    128    
48     32     
64     80     
-416   -144   
224    -32    
-192   -48    
80     -128   
128    -192   
-16    -192   
160    -160   
-32    -112   
-128   -384   
224    240    
96     64     
16     16     
224    -16    
-64    -80    
112    128    
-48    -64    
32     -192   
288    -80    
-208   224    
-720   -96    
16     -96    
192    -48    
-64    -272   
48     16     
160    -144   
-16    96     
64     -64    
-64    -80    
48     -32    
224    -48    
-128   48     
144    64     
-192   64     
224    -48    
-304   -112   
112    -64    
80     -112   
16     -16    
-48    240    
208    -464   
-208   64     
160    -560   
-176   0      
160    -96    
-80    -64    
432    80     
-144   16     
288    176    
-224   48     
-240   176    
-16    112    
-656   80     
16     -48    
-16    0      
64     -64    
-160   -208   
16     -624   
16     48     
-112   144    
32     32     
-32    32     
16     -144   
-80    0      
16     32     
128    64     
-112   -64    
-144   -64    
320    64     
-144   -32    
16     -208   
288    240    
32     -208   
-64    16     
-288   112    
160    -96    
-336   -80    
144    -16    
-16    -96    
64     0      
16     144    
-32    -48    
-272   32     
160    -240   
224    112    
-48    144    
144    192    
96     -528   
-48    64     
-272   -96    
-16    -240   
208    96     
-112   176    
-208   -16    
-48    -48    
16     48     
112    -48    
-240   0      
16     -80    
-288   80     
224    16     
-32    -16    
-320   -272   
-1424  -64    
-128   -176   
-640   -112   
-112   112    
48     -176   
208    80     
-128   -208   
-224   352    
112    272    
-240   240    
-240   96     
-464   128    
144    496    
-176   720    
-80    288    
-272   80     
-608   272    
-48    64     
-288   -64    
-1008  0      
-32    -16    
144    128    
-336   -64    
144    32     
-48    96     
-32    -16    
80     192    
-96    -96    
-32    -112   
-32    16     
288    320    
-304   368    
-224   160    
-224   -64    
-144   96     
272    160    
-480   208    
-144   80     
-64    -48    
128    80     
-128   -320   
48     160    
112    112    
-272   144    
-32    256    
112    -16    
-80    48     
-80    32     
-16    80     
-128   16     
48     96     
-384   -48    
0      64     
-32    -160   
-144   -112   
-16    -48    
48     192    
-224   -112   
-128   -192   
-64    32     
112    96     
-256   32     
-16    48     
64     176    
-160   0      
-192   -16    
-496   -128   
112    32     
-1024  -32    
64     96     
-96    -80    
16     160    
-48    80     
-112   48     
-160   -16    
-112   -32    
112    96     
-32    80     
-80    -16    
96     -16    
16     -32    
-112   -64    
32     80     
-144   112    
48     144    
-160   -112   
64     208    
80     560    
256    16     
-112   32     
160    -32    
208    32     
-208   -48    
96     48     
-112   32     
64     112    
-128   32     
-16    112    
-352   -64    
208    -48    
160    -80    
112    160    
-32    848    
256    416    
-448   -352   
48     176    
32     32     
32     368    
-80    96     
112    80     
-32    256    
-352   -448   
128    272    
-112   -240   
-80    -208   
384    128    
-272   80     
208    64     
-320   -80    
176    -80    
-32    32     
80     256    
-176   -48    
288    -208   
-272   128    
-32    -32    
16     -48    
160    208    
-192   96     
160    -112   
48     352    
-16    224    
-208   -288   
-192   -1200  
80     -544   
32     592    
96     416    
-80    -96    
64     176    
-32    32     
32     96     
-96    64     
304    352    
-160   272    
-16    64     
-16    16     
96     -32    
-80    80     
160    144    
-32    48     
-128   -64    
-16    -160   
192    80     
144    224    
-48    192    
48     144    
64     160    
-48    144    
-432   -256   
96     -48    
-16    48     
736    592    
-512   608    
-192   -80    
224    -432   
112    -16    
-128   48     
-160   -192   
80     -96    
-16    272    
224    272    
-176   304    
336    432    
-80    96     
272    80     
-240   112    
-208   -96    
-208   -112   
544    48     
-432   96     
224    -80    
-48    208    
-32    784    
272    752    
-32    416    
208    208    
-144   -32    
-256   -96    
-80    -208   
-416   -592   
160    -176   
-112   496    
-112   240    
48     -80    
-256   -112   
32     -160   
-224   -448   
16     -512   
288    -80    
-272   496    
32     368    
-224   144    
288    0      
-448   -416   
64     -272   
0      176    
0      64     
80     80     
-208   -176   
448    -80    
-192   256    
-32    -48    
-112   1168   
224    -496   
-192   176    
272    -64    
240    192    
-144   -288   
368    80     
64     464    
-240   -400   
0      240    
288    -352   
48     400    
80     80     
96     -32    
160    -256   
96     -16    
144    80     
16     480    
16     -496   
112    -288   
-48    -48    
-16    -16    
144    -1200  
96     208    
-112   96     
32     112    
192    144    
192    464    
112    128    
-80    -16    
144    208    
-64    256    
144    128    
-16    416    
48     96     
48     -272   
-128   480    
192    -640   
-240   96     
144    -112   
80     16     
240    32     
-144   -32    
160    0      
64     -384   
-224   -496   
240    -240   
-96    -32    
32     -192   
-48    0      
96     0      
80     32     
272    -384   
64     160    
-192   160    
-144   96     
112    272    
208    256    
-176   -32    
320    496    
-160   128    
32     176    
192    48     
-16    -16    
80     -32    
-80    -240   
-144   -176   
96     -608   
144    368    
-16    -416   
-112   96     
224    -64    
64     -32    
-80    -240   
176    80     
48     64     
-16    0      
-32    -64    
368    64     
-176   160    
64     -80    
0      96     
176    -128   
-32    -64    
80     -256   
256    96     
-32    -160   
112    224    
-128   -16    
-80    0      
368    80     
-176   160    
-32    -16    
176    32     
-48    48     
0      -160   
128    48     
240    64     
32     -16    
64     -208   
32     16     
80     -160   
-16    0      
96     80     
-16    96     
96     144    
32     -160   
0      0      
48     -96    
64     80     
-64    -80    
64     112    
0      32     
-48    96     
80     -48    
32     96     
48     -80    
-48    64     
0      -112   
176    -96    
-64    -96    
128    64     
-64    160    
192    -32    
-112   80     
256    32     
-160   64     
-16    -240   
304    112    
0      -128   
48     -48    
16     -16    
96     -256   
224    -16    
-96    -1712  
-64    -1024  
240    -64    
96     256    
208    368    
-160   -1936  
-80    -224   
192    80     
0      48     
48     16     
32     112    
64     -432   
-48    0      
80     -352   
-272   112    
224    16     
-224   -32    
-144   -48    
0      -304   
80     -96    
16     -304   
32     -64    
48     -368   
-32    64     
336    176    
-240   -272   
80     -176   
96     192    
16     -96    
-48    160    
256    32     
144    160    
-1680  -144   
320    144    
-160   -224   
-48    128    
176    160    
-176   -176   
144    48     
0      -1376  
64     32     
80     32     
144    128    
-16    -112   
-16    464    
336    -48    
-32    0      
160    96     
-80    -16    
-240   48     
32     -32    
64     16     
112    -176   
0      -32    
128    -816   
-208   64     
176    48     
-96    112    
112    -48    
240    48     
-336   176    
-80    32     
64     80     
32     288    
256    -144   
-224   -80    
304    -32    
-80    -368   
-224   -48    
-112   -544   
-80    -96    
112    -1280  
224    -16    
-336   -192   
-48    80     
-144   32     
-48    64     
-160   -64    
112    16     
-64    0      
-32    -64    
-1024  32     
192    48     
16     96     
16     0      
96     96     
32     -960   
-16    80     
0      48     
224    208    
48     16     
-48    -160   
0      -32    
80     -240   
-192   64     
240    32     
-160   96     
192    80     
-640   128    
32     -64    
144    32     
144    -640   
32     32     
96     112    
-32    -240   
-176   -16    
48     272    
-224   80     
-128   112    
-96    96     
-112   -192   
-512   -48    
32     -160   
16     -96    
176    -288   
-144   240    
128    -96    
-80    64     
-288   48     
128    80     
-400   16     
112    -576   
-80    -240   
32     -640   
-80    32     
176    384    
-304   -48    
128    -32    
-96    32     
-48    -752   
16     352    
416    208    
-1040  16     
-384   -176   
160    -320   
-176   592    
160    -272   
-96    -32    
240    64     
-96    32     
240    64     
-64    32     
-32    0      
256    112    
-448   -80    
64     80     
-64    16     
-144   0      
16     352    
-80    -176   
-160   -32    
-1520  208    
-128   -560   
32     -224   
80     112    
0      32     
-16    48     
240    224    
-368   416    
-160   -256   
-96    128    
-32    32     
80     224    
-64    16     
-144   -208   
-16    80     
-256   -208   
-96    48     
208    48     
-112   -160   
-224   -16    
80     0      
32     -32    
96     288    
112    0      
-48    80     
0      48     
-320   -496   
112    -128   
-192   192    
-256   144    
-400   -656   
-80    64     
-320   -144   
128    -112   
16     -160   
112    144    
112    64     
-48    112    
144    -80    
-80    32     
144    64     
-224   -16    
128    160    
-352   -16    
-32    80     
-16    64     
0      16     
-320   32     
112    64     
-848   384    
48     144    
-240   -560   
16     -224   
-128   -96    
0      -208   
-192   -16    
-160   -144   
176    -208   
-16    112    
240    400    
-864   -1136  
-144   -880   
-176   0      
-208   -272   
-432   112    
128    -16    
-144   400    
176    64     
-48    192    
-240   336    
-160   -160   
-304   -272   
192    0      
-64    272    
-304   96     
-96    16     
-48    32     
-496   -640   
240    -544   
-240   560    
240    1472   
-16    400    
-240   -816   
-48    -320   
-112   -16    
112    240    
112    208    
-64    48     
-336   144    
-80    832    
48     464    
-544   -544   
-48    -160   
-192   80     
-560   -336   
224    -112   
-1376  704    
-416   -800   
-16    -128   
320    -240   
144    336    
496    1072   
-400   -528   
64     -128   
112    272    
144    128    
96     -304   
-320   -208   
240    -16    
-240   -208   
96     528    
192    432    
-144   160    
112    336    
304    32     
-256   -96    
144    192    
-80    208    
-192   80     
-144   -240   
-224   224    
224    16     
-384   -80    
32     112    
-160   -48    
128    144    
208    464    
32     192    
32     80     
192    128    
-112   128    
160    464    
48     96     
-96    -32    
96     64     
192    208    
-208   208    
-272   -32    
176    16     
-144   -192   
272    -16    
80     208    
16     96     
-96    96     
192    192    
-16    144    
-80    208    
64     0      
-320   -368   
432    -16    
-80    144    
144    128    
-80    0      
80     160    
-80    -16    
48     128    
-48    16     
16     16     
64     48     
-144   16     
48     96     
-80    -48    
48     176    
208    80     
48     144    
-64    -32    
16     112    
-96    32     
32     96     
96     288    
-176   112    
0      128    
256    64     
0      48     
32     48     
-48    0      
48     -80    
-16    112    
64     96     
-192   0      
-80    -144   
-64    48     
-208   0      
112    -32    
-80    16     
224    144    
224    288    
-160   16     
48     128    
128    48     
-64    80     
64     48     
96     144    
-80    32     
48     32     
0      80     
48     64     
80     32     
-16    64     
-96    48     
192    48     
64     176    
-48    0      
-96    80     
16     0      
224    64     
0      80     
64     0      
-176   -48    
192    112    
-112   -96    
96     160    
0      48     
-48    -576   
144    160    
-160   128    
-16    80     
32     -48    
96     16     
-16    -32    
80     -48    
16     0      
-96    32     
64     0      
80     96     
-112   64     
16     64     
128    32     
-304   -416   
464    112    
-144   -560   
32     80     
-144   176    
144    16     
-80    80     
160    176    
-96    112    
160    208    
-208   -96    
208    176    
-112   0      
0      128    
176    16     
-16    -96    
48     -32    
240    80     
-64    192    
96     224    
224    304    
-128   64     
0      160    
112    32     
80     16     
48     32     
64     128    
32     16     
-224   -272   
384    128    
48     -16    
112    240    
128    -768   
0      48     
240    -320   
64     192    
96     32     
48     112    
-32    64     
32     96     
192    80     
-208   112    
80     48     
-80    16     
32     48     
-64    -208   
128    -128   
112    -144   
144    112    
-80    -544   
64     176    
32     160    
-16    48     
80     128    
48     160    
-144   -16    
112    128    
176    192    
-144   -32    
0      -16    
256    -32    
176    64     
-224   -160   
-32    32     
224    -64    
-48    -48    
-64    -80    
144    160    
128    96     
16     160    
-48    48     
-48    -448   
112    128    
-128   -800   
-16    32     
128    48     
-144   48     
256    -176   
64     208    
112    -208   
16     -32    
-128   192    
304    224    
-64    64     
-96    -144   
192    80     
-192   -336   
160    160    
32     -176   
-144   -160   
224    -64    
0      144    
-176   -800   
-32    -208   
352    -112   
-48    192    
208    368    
-160   224    
-176   80     
96     -832   
-80    -48    
128    -64    
32     -272   
16     48     
-64    -928   
240    128    
80     112    
-80    -128   
176    32     
272    160    
-144   160    
16     96     
64     -528   
-64    64     
160    -32    
-128   -256   
-768   -240   
208    160    
64     -336   
224    -160   
-144   -480   
-16    -2720  
80     -240   
144    336    
-80    192    
-208   -400   
48     96     
-80    -240   
-208   256    
160    -416   
64     352    
-704   128    
80     -32    
32     -192   
112    112    
0      -128   
16     -32    
64     112    
-32    -800   
0      48     
-96    -96    
96     16     
-16    -16    
-192   -176   
288    -256   
-48    240    
-144   -96    
80     -208   
160    48     
-64    -288   
48     -240   
-32    -272   
64     -48    
32     -1312  
48     16     
96     0      
0      16     
64     64     
0      96     
-192   -48    
80     -32    
-368   -80    
64     -32    
-752   -16    
128    400    
32     48     
-64    -192   
-16    32     
192    -208   
-176   192    
176    -16    
-16    112    
144    -32    
-32    -80    
-64    -64    
96     32     
-144   -16    
144    0      
-560   64     
32     -80    
-272   -144   
112    -208   
96     48     
32     16     
128    256    
48     -208   
-240   128    
208    112    
-272   -16    
160    96     
-16    -256   
176    -32    
96     -96    
0      16     
304    32     
-128   272    
112    -32    
-176   848    
368    752    
-160   64     
224    -368   
-96    336    
32     64     
-16    -80    
16     176    
96     -144   
-96    -64    
128    -96    
0      48     
16     -64    
-144   64     
80     -64    
-128   16     
96     -320   
-64    80     
496    -368   
-304   160    
-192   16     
-96    -512   
-144   -240   
128    -16    
-224   -96    
64     304    
-160   -320   
128    -176   
-32    0      
-112   -544   
304    1616   
-112   432    
-320   -1024  
160    48     
-16    272    
-240   64     
208    0      
-64    96     
16     -96    
-304   -256   
224    -352   
64     32     
-192   -48    
-192   96     
16     -448   
0      528    
-320   -96    
-352   -256   
32     -96    
-688   16     
-128   368    
-144   64     
-224   -64    
352    48     
-128   80     
0      16     
-320   -128   
128    -192   
-32    80     
-288   0      
80     64     
48     -480   
-80    -272   
48     -80    
-352   -240   
176    -208   
144    48     
16     112    
16     240    
-128   -80    
-400   -16    
-272   -656   
224    -112   
112    224    
-352   -48    
16     144    
240    160    
-736   -80    
432    -80    
-160   -16    
352    368    
48     80     
-96    32     
48     16     
224    448    
-592   112    
176    80     
-240   272    
96     -16    
-400   -80    
400    16     
0      -16    
-128   0      
-112   -16    
64     16     
-112   0      
16     32     
-160   112    
-80    176    
112    144    
-400   48     
-304   0      
-1440  -96    
0      80     
16     -176   
-96    224    
112    32     
-80    32     
48     80     
-144   48     
16     -112   
16     160    
96     32     
32     144    
-96    32     
112    160    
-240   144    
-1072  -80    
32     112    
-16    288    
96     32     
-16    80     
96     64     
-144   -80    
-48    -192   
384    192    
-240   64     
-16    128    
-144   48     
32     16     
-208   -16    
80     32     
-160   -16    
96     48     
80     16     
112    96     
-48    -96    
-208   -32    
224    80     
-256   -144   
-48    96     
-48    0      
-112   -32    
-48    64     
112    16     
-224   -80    
32     16     
-112   64     
-224   48     
-864   -64    
-192   80     
112    176    
-48    144    
-64    160    
-16    112    
192    96     
-176   -128   
-16    96     
112    48     
16     48     
-32    16     
160    144    
-208   -32    
-112   -240   
144    48     
16     64     
-48    144    
-96    64     
160    128    
16     96     
-144   48     
208    96     
-144   -64    
32     64     
-112   -32    
-32    -160   
112    144    
-96    -32    
-160   160    
112    80     
96     160    
-16    -16    
0      -96    
0      -32    
112    208    
-176   144    
-96    96     
176    16     
0      48     
64     64     
-160   -80    
112    128    
-16    -32    
-128   96     
80     80     
0      16     
-80    -16    
-16    -32    
-48    112    
-80    64     
48     64     
48     48     
64     -112   
-32    -16    
48     64     
96     64     
-80    80     
-64    64     
384    144    
-96    112    
-64    32     
32     112    
-80    64     
-144   192    
304    96     
-16    -16    
48     -160   
64     240    
32     112    
-16    48     
32     32     
48     80     
112    208    
-144   192    
80     304    
-112   160    
-128   -16    
352    80     
-144   -16    
0      -32    
64     64     
-48    112    
-32    144    
-240   -48    
64     -32    
-176   -32    
176    160    
-160   112    
-80    16     
-32    64     
96     128    
-16    128    
0      48     
-128   -128   
16     16     
112    128    
-48    -80    
176    128    
-144   48     
-16    64     
128    -80    
16     -192   
-64    -80    
192    128    
-16    160    
-128   16     
-16    112    
368    448    
-368   176    
-16    64     
128    1008   
32     432    
-288   -192   
64     144    
-128   -80    
160    16     
96     -528   
0      240    
-48    32     
-96    224    
64     48     
16     48     
48     -48    
-144   -64    
-48    160    
160    128    
-192   16     
352    256    
-336   208    
176    304    
-288   224    
192    -160   
-96    64     
-32    -544   
48     -96    
-48    -240   
272    -16    
-64    -128   
64     -320   
-32    -144   
240    448    
256    272    
-176   160    
224    32     
48     -208   
-400   -656   
-64    -336   
16     416    
-160   -64    
96     144    
0      -16    
-32    -80    
-32    -176   
64     48     
128    304    
-256   -96    
128    -16    
-80    288    
32     -256   
192    -160   
16     272    
48     -400   
128    384    
80     144    
112    80     
112    288    
64     96     
-48    -176   
112    96     
-48    -32    
48     80     
80     288    
272    304    
-160   256    
64     400    
32     -160   
-112   -880   
224    80     
160    464    
-80    272    
32     -976   
-16    -144   
48     -1008  
-32    -112   
96     96     
80     176    
112    432    
-112   240    
64     -112   
80     16     
48     32     
64     -16    
16     112    
32     -784   
0      -112   
176    -144   
0      416    
96     -176   
144    -128   
96     80     
-32    64     
64     32     
64     128    
32     48     
96     -112   
128    80     
-96    -912   
48     64     
64     -160   
80     96     
48     -96    
96     80     
-48    -304   
-160   -400   
112    -304   
240    0      
0      192    
80     176    
112    32     
0      -288   
80     -48    
208    -32    
-32    432    
96     128    
64     64     
0      -304   
256    208    
-80    208    
128    16     
96     80     
16     -592   
32     48     
80     -176   
32     -2336  
32     -304   
-32    -208   
64     -160   
160    592    
32     256    
-48    192    
-48    -96    
-112   -416   
80     -352   
112    -512   
256    -112   
-16    -320   
80     128    
336    416    
48     288    
224    -48    
-48    -192   
80     -144   
32     -64    
48     -208   
48     16     
-208   -64    
608    656    
-384   112    
112    -656   
32     48     
208    -32    
-16    -16    
-224   64     
-240   224    
352    -1008  
32     496    
32     176    
-96    -1008  
224    -80    
160    400    
48     320    
-16    -64    
48     192    
-224   32     
-32    416    
-48    -400   
-112   -352   
240    736    
-96    48     
-48    -240   
208    -720   
96     -144   
112    224    
16     192    
128    128    
176    -16    
112    496    
144    272    
-32    32     
96     176    
16     160    
-80    -16    
-400   -32    
64     -48    
-560   -48    
144    256    
48     64     
96     -176   
160    -32    
240    -416   
-208   224    
16     32     
160    -16    
160    -32    
80     400    
-272   96     
-176   112    
96     32     
16     16     
208    256    
-240   32     
272    112    
48     -16    
64     -16    
16     -640   
64     112    
272    -16    
-32    80     
0      -48    
160    64     
80     160    
-128   -112   
-32    16     
144    96     
-208   -160   
272    -480   
-176   -144   
144    -160   
-112   16     
0      -176   
240    64     
272    0      
-384   -112   
-112   256    
160    32     
-192   -32    
112    -192   
-176   -96    
16     -112   
-384   32     
32     64     
-496   96     
0      -32    
-144   -16    
48     -240   
0      112    
112    -544   
-176   48     
-96    -64    
-176   -288   
144    -32    
160    -160   
-80    64     
16     -256   
-96    224    
-240   0      
32     0      
208    -64    
-16    144    
112    -144   
16     80     
208    -128   
224    80     
-144   -32    
160    128    
96     -16    
0      -48    
-160   0      
32     48     
16     0      
-144   64     
-16    32     
80     -240   
-240   -48    
-96    -208   
176    192    
-432   -128   
-960   48     
16     32     
-1616  -160   
-16    -16    
288    48     
-48    64     
448    144    
-368   0      
192    -176   
-384   0      
-224   -128   
16     64     
-96    -112   
176    48     
-16    128    
144    80     
-240   -32    
-176   128    
-64    16     
-176   16     
-208   16     
96     64     
-288   -48    
-256   -128   
32     16     
-48    16     
16     -240   
-192   80     
96     160    
-272   -16    
-16    48     
80     48     
-224   16     
48     80     
-304   64     
-272   -304   
-1616  -112   
272    160    
-368   48     
128    64     
-48    -96    
96     96     
-160   -224   
-64    16     
64     96     
-80    -16    
-176   16     
64     64     
-48    -16    
-208   -16    
-96    -48    
-96    48     
-64    -96    
-48    32     
48     64     
64     112    
-80    96     
16     -64    
48     144    
32     0      
0      80     
32     16     
32     240    
32     16     
32     48     
-16    -16    
48     256    
128    64     
-656   -80    
96     16     
-224   -96    
160    0      
-96    112    
192    -16    
-144   0      
208    80     
-48    80     
32     32     
16     64     
-80    0      
16     64     
-128   256    
32     176    
-464   32     
-48    80     
-64    144    
-48    208    
96     32     
-240   48     
32     64     
-224   0      
48     16     
-240   -448   
-32    -432   
320    -112   
-48    96     
-96    -112   
32     112    
208    480    
-144   624    
-288   160    
112    96     
144    272    
-48    -32    
128    320    
-288   -208   
-48    -64    
192    192    
-96    16     
-192   -80    
-80    -96    
336    112    
-112   128    
0      0      
128    112    
-1072  -304   
-32    -720   
96     -240   
112    160    
16     48     
112    112    
-48    -80    
48     208    
0      160    
32     256    
16     432    
-32    16     
176    448    
-160   16     
48     224    
144    176    
16     -176   
-208   -336   
400    336    
-176   288    
-16    64     
-112   -16    
64     96     
32     288    
-16    160    
304    144    
-32    256    
-112   272    
-192   -64    
96     -80    
-112   -272   
288    176    
160    176    
-144   -112   
176    320    
-16    240    
-80    -80    
384    240    
-208   128    
96     -272   
-112   448    
128    144    
-176   -64    
128    -128   
96     192    
448    256    
-304   -256   
144    -192   
48     -80    
128    384    
-48    0      
0      208    
0      -96    
-128   160    
-160   176    
-112   -176   
64     -320   
48     144    
-48    640    
528    208    
-624   -496   
-112   -464   
16     -224   
192    224    
96     144    
-80    80     
32     128    
-256   -64    
-32    80     
208    32     
-64    64     
-32    16     
32     112    
80     224    
32     0      
-64    64     
80     496    
-64    112    
-96    240    
384    400    
-144   -96    
-128   -144   
-64    -352   
96     256    
128    64     
16     224    
176    400    
-96    32     
32     336    
144    -64    
-48    80     
112    160    
-80    -48    
16     160    
80     -64    
80     64     
-64    96     
-80    -64    
176    -352   
-192   -352   
176    -240   
-160   -128   
288    -16    
-144   288    
16     208    
144    80     
-96    80     
48     16     
80     80     
0      48     
0      64     
48     80     
0      32     
96     112    
128    144    
-288   -32    
320    -368   
304    352    
-432   -128   
-48    -592   
176    16     
112    272    
-64    -16    
192    192    
-48    16     
-96    -352   
192    160    
-272   -32    
144    -80    
0      -112   
96     928    
-80    -128   
32     -464   
96     528    
32     -608   
48     -64    
256    128    
-256   16     
-16    128    
256    80     
-144   64     
288    176    
128    336    
-16    736    
96     208    
48     448    
0      -80    
112    -752   
368    752    
-160   0      
160    80     
144    -720   
32     160    
-96    64     
-96    16     
0      32     
144    208    
0      128    
-48    -128   
16     512    
208    464    
80     336    
0      -16    
16     160    
0      -336   
-96    -128   
144    -1440  
32     -128   
-176   -368   
304    0      
0      144    
-64    64     
176    208    
-160   -112   
32     48     
-288   80     
-16    -288   
272    -320   
-16    -80    
176    -224   
-32    0      
0      -320   
64     112    
-16    -368   
208    128    
-80    -16    
112    96     
48     16     
-32    320    
64     64     
-112   -80    
16     -16    
160    -672   
-256   -432   
48     -352   
112    64     
-32    -32    
-176   -160   
432    80     
-240   128    
336    -32    
-144   144    
144    -144   
16     -80    
0      112    
160    -272   
-240   160    
128    -464   
256    -432   
96     304    
272    160    
-144   176    
448    32     
16     -1488  
240    -144   
48     -80    
64     96     
-32    -16    
16     160    
96     -960   
-128   -48    
48     -64    
128    -288   
0      128    
-96    -128   
-176   32     
272    112    
-96    192    
16     -80    
0      -96    
288    48     
176    16     
64     -480   
-48    -48    
192    -896   
-128   -112   
-16    -976   
112    -64    
80     96     
32     -16    
-64    64     
240    -272   
272    -368   
48     -112   
320    -480   
64     -256   
272    -272   
176    -32    
-1600  -208   
32     -304   
80     -48    
48     -48    
32     -224   
112    -1408  
-80    -240   
-16    -224   
368    -48    
-48    -320   
304    176    
-64    32     
112    32     
-80    -144   
240    -32    
-224   80     
32     48     
192    144    
96     -80    
48     -144   
160    -528   
64     80     
0      -464   
128    160    
-64    -64    
-208   -128   
144    -32    
-16    48     
-80    -96    
0      64     
-16    16     
-144   -32    
400    -96    
-32    -384   
144    -80    
-64    -288   
0      16     
224    -256   
-272   -16    
160    -16    
-48    32     
80     -48    
128    -16    
-64    32     
48     -144   
-272   -16    
80     32     
-1216  16     
64     -64    
-16    96     
144    16     
-192   -48    
64     -208   
64     80     
80     -112   
48     80     
48     0      
608    432    
-544   320    
96     32     
32     48     
128    0      
-176   64     
-80    -192   
-32    -64    
-16    0      
32     -128   
-16    -176   
176    128    
16     -608   
0      112    
-80    -16    
-80    -224   
64     48     
-32    16     
-240   0      
208    48     
-192   -64    
-16    -32    
-320   -48    
0      -80    
48     48     
80     -160   
96     144    
16     -720   
64     112    
-64    80     
48     0      
-256   0      
64     0      
32     96     
80     32     
-272   112    
32     48     
-144   -112   
32     -160   
112    16     
0      -80    
-64    16     
240    -320   
176    -192   
-144   -32    
48     -288   
-48    -96    
224    -80    
-272   0      
224    64     
-208   256    
80     32     
112    32     
96     -128   
-16    -16    
96     0      
-208   176    
-128   -544   
-224   16     
336    96     
-496   -192   
-128   -800   
304    208    
-256   32     
272    -32    
-32    160    
48     32     
-496   -96    
-96    -32    
-80    320    
-752   -368   
224    816    
-80    -272   
-16    -32    
-176   352    
-32    368    
-128   -144   
-384   -240   
80     192    
-256   -96    
-176   -576   
80     96     
-32    272    
-368   -176   
0      192    
80     320    
-48    -224   
-224   48     
-16    -80    
-80    -64    
-496   -416   
-32    176    
-176   192    
-32    160    
16     160    
-288   -48    
176    -80    
-144   -96    
0      128    
-32    176    
-64    48     
-48    48     
-48    80     
32     128    
-192   -32    
112    -240   
-144   256    
-80    16     
272    384    
-1856  -128   
-288   -352   
0      -224   
0      128    
160    16     
-336   -192   
352    -800   
144    48     
384    272    
-128   112    
544    512    
240    1264   
-208   224    
-16    -176   
176    -112   
128    96     
-496   32     
224    -224   
-544   -224   
-80    -624   
304    336    
-112   480    
-16    -272   
144    -48    
48     96     
-16    80     
0      -272   
160    -208   
-448   128    
160    -464   
0      0      
-96    96     
32     -112   
-368   400    
0      -448   
80     -32    
-256   -80    
96     -224   
-224   128    
256    -224   
-32    880    
-32    -304   
368    -304   
160    880    
-80    80     
-144   -96    
112    112    
-288   -112   
32     96     
-128   -32    
144    80     
-16    48     
48     64     
48     16     
0      -144   
0      96     
240    672    
-288   176    
48     320    
-96    -80    
-112   352    
64     16     
-160   -96    
192    80     
-752   -208   
-64    224    
64     64     
128    160    
192    144    
-96    704    
-16    32     
96     -32    
-96    400    
-16    -336   
128    144    
-592   -544   
464    -16    
-304   720    
336    496    
-48    -336   
-320   -64    
192    -448   
-160   336    
-96    -240   
160    432    
-48    256    
-208   -96    
112    112    
-64    -32    
0      80     
0      32     
112    80     
-208   -32    
32     96     
32     176    
-96    448    
48     384    
240    -64    
-240   -768   
224    -48    
208    672    
-112   272    
224    240    
16     32     
80     480    
-32    -240   
-48    -176   
48     80     
-160   48     
176    176    
224    176    
-240   -272   
80     -192   
-48    -176   
-32    -128   
80     128    
64     256    
240    400    
-176   48     
96     272    
-32    144    
-48    112    
0      32     
288    272    
-112   288    
32     288    
496    768    
-240   544    
304    816    
-448   96     
48     160    
112    -128   
96     48     
-32    -112   
-16    -96    
48     48     
32     -32    
0      112    
112    208    
-96    64     
-16    -32    
128    128    
176    240    
-176   224    
32     80     
16     48     
176    112    
-144   48     
-48    128    
-256   80     
224    -64    
-16    64     
-48    0      
-32    48     
64     64     
32     48     
96     -208   
48     192    
32     -16    
-176   0      
176    272    
-112   16     
0      64     
112    32     
0      -32    
-48    48     
64     -304   
-224   80     
112    48     
-112   208    
32     80     
-144   -48    
-96    -224   
144    96     
-176   -48    
-16    32     
80     96     
32     0      
-64    -176   
96     -96    
-144   16     
208    -672   
-32    144    
64     -224   
160    176    
-48    144    
-16    144    
-64    128    
176    224    
-96    96     
-208   368    
336    96     
-96    160    
368    192    
-208   80     
16     -400   
80     -80    
0      192    
-112   -608   
80     112    
0      256    
-128   144    
160    128    
128    96     
-16    -32    
32     176    
64     96     
-80    288    
32     160    
0      -64    
224    48     
272    -160   
16     48     
32     96     
112    272    
0      -224   
-112   -48    
160    48     
-304   -240   
-240   -288   
240    -48    
-32    -256   
16     -112   
48     32     
144    192    
272    256    
-80    32     
48     80     
416    304    
-288   272    
64     -304   
272    144    
160    -96    
208    176    
-240   128    
80     96     
-32    32     
384    208    
-160   64     
-48    -160   
80     144    
96     -80    
-112   -128   
176    -64    
176    64     
80     112    
96     16     
80     -1360  
112    48     
-64    32     
128    128    
-96    0      
48     16     
128    16     
32     -48    
176    144    
48     -240   
192    240    
112    -592   
-160   -16    
112    -160   
128    16     
-160   -352   
192    208    
-64    96     
32     128    
-16    48     
144    224    
-48    128    
32     -48    
128    96     
96     -112   
96     32     
32     -160   
-48    128    
-16    -96    
80     80     
32     176    
16     192    
144    -32    
96     192    
-64    -16    
96     -64    
128    240    
192    128    
-144   80     
64     -32    
-16    128    
-32    -16    
48     0      
16     32     
32     16     
0      -400   
688    -208   
-192   304    
-224   -736   
240    -400   
64     -48    
0      -1024  
-32    -64    
224    160    
192    48     
-32    288    
80     -272   
112    400    
144    -192   
208    -544   
32     464    
16     -384   
176    256    
-48    -192   
48     -128   
64     0      
112    192    
0      -352   
-32    -464   
160    128    
-176   -864   
96     176    
80     368    
-16    -384   
16     16     
16     16     
-176   -352   
-96    -112   
-192   -400   
80     16     
-352   -80    
256    -128   
128    288    
288    112    
-96    320    
64     -400   
0      0      
-16    -1312  
48     96     
-32    224    
176    -144   
-128   32     
176    112    
-304   -144   
48     -128   
-144   16     
96     16     
-48    -64    
128    64     
-176   -480   
304    -144   
144    352    
64     -496   
32     16     
256    -32    
48     448    
-80    -112   
48     -16    
256    112    
16     512    
-496   -304   
128    -368   
-1696  -80    
176    224    
384    320    
-368   208    
-80    -64    
-320   -544   
48     -272   
304    -496   
144    320    
128    144    
304    16     
96     64     
-112   -304   
-160   -176   
-64    0      
-80    16     
-192   -208   
-432   -16    
160    432    
-48    32     
-64    -400   
96     160    
128    -1808  
-224   -80    
-32    64     
-272   80     
32     -112   
-16    -96    
32     -48    
-304   112    
-288   -80    
-80    -96    
-112   320    
-48    64     
48     -80    
-32    -528   
16     -64    
144    -96    
-16    432    
-48    0      
176    128    
-176   -64    
-96    0      
-80    -224   
112    -64    
0      -16    
688    736    
-864   -784   
48     -784   
112    144    
144    720    
304    368    
-128   -288   
-128   -80    
-112   -96    
-400   224    
176    -672   
128    -224   
-320   352    
64     -224   
-32    128    
96     -96    
-160   272    
128    -32    
48     -352   
48     -176   
208    432    
64     -112   
-16    -320   
-48    -144   
48     112    
-208   -576   
-96    320    
-48    -288   
-64    -96    
16     16     
-32    0      
144    144    
-352   -160   
160    224    
-656   -656   
96     -192   
-32    -112   
-576   -304   
256    224    
-336   -48    
16     -96    
-112   160    
-384   -368   
176    -112   
208    336    
-304   -112   
176    -160   
-400   -16    
32     528    
-48    -560   
176    480    
-80    -32    
-192   -304   
0      352    
-32    16     
-256   -352   
-528   -288   
80     64     
128    336    
-160   496    
-16    -480   
64     -320   
-336   -192   
96     304    
176    400    
-336   -16    
-48    -336   
-48    288    
64     304    
-320   -272   
-224   -368   
48     112    
-96    336    
-640   112    
-208   272    
-240   64     
240    176    
-400   -128   
272    -32    
-144   -144   
80     -112   
64     -48    
112    -16    
-80    32     
0      160    
160    96     
-112   160    
-16    0      
-64    -112   
-192   32     
-96    16     
48     240    
-16    -80    
32     48     
128    96     
-128   32     
-32    -32    
-64    -64    
80     -96    
-80    96     
-48    32     
-64    16     
80     176    
-400   128    
-16    160    
-48    -64    
-32    32     
16     -80    
-96    80     
-96    0      
144    80     
-16    48     
-128   16     
48     -32    
-160   -16    
112    64     
-112   64     
64     160    
-208   -192   
336    -96    
-208   -192   
-80    96     
96     -160   
-96    0      
16     -16    
-16    112    
176    96     
-256   -16    
112    48     
-112   48     
48     96     
-16    64     
-48    112    
-16    32     
-64    112    
-160   -64    
64     -192   
-144   -544   
-16    -96    
96     496    
48     160    
-208   80     
-48    64     
-80    208    
16     16     
-224   -224   
160    64     
48     288    
-80    -128   
16     32     
0      -128   
-64    144    
64     80     
-64    -96    
96     -208   
-272   -240   
224    144    
-64    256    
48     160    
48     144    
-144   -32    
224    16     
-320   -304   
64     32     
-16    192    
16     96     
-96    80     
-128   -16    
272    -176   
48     16     
-32    112    
96     176    
80     16     
112    64     
64     16     
0      -16    
-16    112    
16     128    
256    384    
-384   96     
48     32     
224    272    
-48    208    
48     192    
128    208    
64     176    
32     32     
128    112    
-32    144    
-128   64     
160    112    
-112   64     
16     112    
-160   -16    
64     160    
-176   176    
112    48     
64     240    
176    64     
-16    0      
-16    32     
-48    64     
-224   -256   
192    128    
-32    0      
-208   208    
96     -32    
-224   -48    
368    0      
32     144    
160    64     
0      96     
96     80     
256    240    
-336   112    
48     192    
0      96     
-48    -96    
336    -160   
176    32     
48     64     
-96    32     
144    128    
192    48     
-208   208    
128    272    
-192   64     
224    112    
-128   96     
160    112    
32     32     
-16    -80    
144    32     
48     32     
-48    -32    
64     80     
-80    48     
112    208    
48     -160   
0      -128   
112    160    
-112   96     
-16    -112   
-32    -144   
-16    -32    
16     112    
80     128    
96     -32    
-80    -112   
144    -16    
208    80     
0      16     
32     144    
-160   -416   
-80    -1152  
80     80     
112    176    
16     -16    
32     -48    
-128   -16    
96     208    
-48    336    
-16    0      
-16    -304   
-64    -80    
224    160    
32     -80    
-48    304    
144    224    
-16    -80    
96     96     
-32    -224   
-16    0      
64     16     
96     48     
112    64     
0      80     
64     80     
64     96     
32     -96    
32     128    
-64    0      
144    512    
160    112    
-112   -208   
224    704    
-272   -1104  
-48    -112   
112    -64    
-64    464    
32     -176   
-80    256    
96     -112   
-64    192    
64     -112   
32     64     
192    96     
-64    -80    
-48    -80    
160    -128   
160    256    
-80    -48    
112    -128   
64     -896   
64     176    
-144   -144   
112    -32    
32     16     
32     16     
128    64     
-16    112    
144    80     
-32    128    
-48    -32    
128    -208   
48     384    
160    -128   
-144   -384   
80     -528   
160    48     
-16    -160   
96     144    
-128   -32    
240    128    
-128   96     
224    176    
-96    64     
48     -80    
32     112    
96     -48    
0      80     
96     -176   
16     96     
96     -1184  
48     160    
0      -1296  
-160   -96    
0      -320   
208    16     
-32    160    
48     80     
96     256    
192    352    
224    160    
464    304    
-176   320    
80     -112   
400    96     
32     -160   
80     16     
224    -240   
192    192    
160    -16    
-192   352    
624    432    
-176   256    
-368   -320   
96     -496   
-256   112    
448    32     
-208   144    
464    464    
96     560    
16     464    
160    -144   
64     112    
144    -96    
-256   -224   
-192   -1344  
-48    -384   
48     80     
176    -1296  
-176   -112   
-16    128    
144    48     
304    192    
-96    -64    
64     272    
-160   -128   
-144   -128   
0      560    
-160   -80    
-176   -640   
80     400    
-32    224    
-288   208    
224    -544   
-288   -544   
96     -480   
-48    48     
352    -832   
128    208    
32     208    
0      -256   
176    -80    
-96    -176   
48     352    
160    -80    
-144   160    
304    16     
80     32     
-128   -576   
240    -1104  
-144   0      
-32    592    
240    -1264  
-336   -528   
-144   592    
64     256    
-48    80     
80     -48    
-48    144    
64     464    
-240   304    
-32    -224   
-496   -720   
-128   -336   
112    0      
160    432    
-32    128    
208    -224   
-48    -32    
16     -256   
0      -80    
304    304    
-112   64     
-32    32     
144    0      
-144   -48    
160    -16    
-16    -112   
176    112    
-256   -32    
96     16     
128    -80    
16     -320   
-112   16     
160    224    
32     96     
64     -208   
-96    192    
96     -48    
48     -64    
-16    224    
48     -80    
-64    -128   
96     -288   
-448   -112   
-16    -192   
-160   -16    
-128   -80    
-16    144    
-16    -112   
-32    48     
-144   -96    
48     80     
96     112    
96     -16    
-64    48     
160    0      
-128   -64    
96     -112   
-256   -64    
128    -128   
-224   -48    
256    -128   
-112   -80    
192    -320   
-144   192    
272    -464   
-32    80     
-16    112    
-80    -80    
-128   -64    
272    192    
-608   -48    
288    0      
-256   48     
208    32     
-256   432    
112    -64    
-336   -64    
528    -288   
16     208    
128    32     
64     -64    
112    -16    
64     -64    
-304   -96    
160    -80    
-16    112    
16     -32    
16     64     
160    -128   
-224   16     
192    -256   
-48    64     
112    -192   
16     32     
128    -288   
16     -96    
-64    -64    
112    -16    
-224   -48    
-16    32     
-16    0      
128    32     
-304   -96    
32     -80    
-64    0      
64     -160   
16     64     
-336   192    
-288   16     
-512   -128   
-208   80     
-64    208    
-400   80     
-128   96     
144    304    
96     -48    
-256   -96    
208    -80    
64     -128   
-112   32     
-288   240    
80     176    
-432   -80    
-80    64     
0      112    
-192   48     
96     48     
-368   -128   
-96    -240   
-96    -288   
-16    16     
64     32     
-48    112    
32     64     
16     96     
-144   -64    
240    64     
-208   -368   
80     112    
-16    240    
-192   16     
48     48     
-32    160    
-144   112    
-192   32     
-256   16     
-672   -32    
-96    32     
-160   -448   
-32    192    
-160   -256   
-32    128    
160    -80    
0      96     
-32    256    
64     -32    
-160   -32    
208    64     
-368   96     
-176   -288   
160    96     
-320   112    
-96    64     
48     -64    
-64    -16    
80     -48    
112    144    
16     48     
112    336    
-400   240    
-192   -112   
-16    128    
32     0      
144    96     
-416   192    
64     112    
-528   -48    
352    192    
-640   80     
-16    -80    
32     48     
16     96     
32     16     
-64    32     
80     144    
-32    160    
272    0      
-48    112    
-96    96     
-32    -128   
-160   0      
-112   -48    
96     32     
-464   80     
144    192    
-432   16     
272    48     
-160   16     
288    16     
96     144    
32     96     
16     80     
64     32     
304    224    
-288   208    
-80    16     
-32    -48    
112    48     
-432   -256   
-16    16     
-672   96     
-224   208    
32     32     
288    288    
-224   160    
32     112    
48     64     
0      48     
16     -32    
96     -112   
640    576    
-528   208    
128    240    
-432   -128   
256    -144   
-144   -176   
-16    -64    
176    80     
112    80     
-16    144    
0      192    
-112   144    
64     160    
80     32     
-128   144    
-64    64     
-48    -176   
208    96     
-128   -32    
112    416    
-288   -64    
80     -320   
-16    192    
-96    -256   
224    240    
-160   144    
-16    -352   
160    752    
-256   -384   
-192   272    
240    112    
-224   -208   
272    304    
-80    304    
176    208    
304    704    
-512   -624   
-96    192    
80     -128   
0      272    
64     400    
-272   -144   
320    16     
-224   64     
-80    16     
16     144    
240    64     
-96    80     
-176   -80    
0      48     
0      48     
48     96     
320    240    
-192   96     
80     -64    
16     -16    
-32    416    
16     -32    
-64    -80    
-32    32     
32     192    
-112   352    
176    240    
-160   240    
112    112    
-48    -112   
96     0      
48     -128   
-32    0      
64     48     
-80    0      
16     64     
16     144    
112    112    
-80    64     
16     48     
-160   -224   
256    -80    
-32    352    
80     160    
144    80     
-80    80     
0      0      
32     128    
-160   32     
-320   -496   
64     -128   
-48    -224   
144    224    
-48    192    
80     80     
-80    -64    
288    -80    
-32    96     
112    48     
-32    32     
128    -48    
48     128    
160    16     
-32    96     
32     -48    
-32    64     
-48    32     
16     32     
-96    -160   
112    -80    
-16    112    
320    -528   
144    288    
288    368    
-192   224    
160    112    
16     448    
144    144    
208    272    
96     736    
-64    160    
160    -128   
-48    96     
240    32     
144    288    
16     176    
-112   -208   
304    336    
-48    -320   
-80    144    
320    192    
-192   352    
32     0      
128    16     
-48    -48    
-96    32     
144    256    
336    368    
-448   -528   
368    -752   
368    640    
96     -80    
-32    48     
304    128    
-80    592    
16     -32    
64     96     
-144   32     
32     64     
-48    -144   
416    496    
-384   -144   
32     -64    
32     128    
-112   256    
160    144    
208    32     
-32    304    
64     -272   
32     448    
192    -96    
-144   -64    
160    -64    
-16    112    
-48    -80    
-144   -448   
80     -320   
160    -32    
-48    -176   
384    -304   
-64    32     
160    -64    
80     160    
0      -256   
272    304    
80     112    
256    288    
-176   240    
32     -64    
-80    -288   
192    -96    
112    -64    
160    16     
208    80     
96     32     
0      -48    
128    -256   
304    384    
-32    256    
368    640    
-272   224    
-32    192    
64     -672   
160    64     
256    112    
-304   160    
48     0      
176    96     
320    64     
-320   32     
16     48     
-96    -416   
240    64     
-96    -144   
96     48     
32     -80    
32     0      
-16    48     
144    80     
-160   96     
96     128    
112    112    
-16    -688   
80     96     
-160   -176   
112    -32    
128    -16    
112    160    
-112   32     
-48    -32    
-48    -208   
0      96     
0      -368   
-32    80     
-16    64     
160    400    
-112   32     
-32    -128   
256    352    
-224   0      
80     16     
-32    -64    
96     96     
-64    -208   
112    0      
-16    -160   
-80    -16    
224    48     
-32    -640   
-48    -16    
192    -32    
64     -432   
-176   16     
144    160    
48     32     
112    128    
-112   48     
80     144    
176    -16    
-288   208    
304    0      
-176   -176   
16     -96    
320    -640   
64     288    
-96    -416   
-32    -32    
-368   96     
-176   64     
336    32     
-96    -32    
112    -32    
128    -848   
176    176    
-32    368    
-192   -96    
48     -208   
256    32     
32     -16    
-128   -64    
112    48     
0      -32    
-256   -64    
96     -304   
48     -64    
112    0      
64     32     
-112   -192   
16     0      
16     -928   
-80    -80    
32     -144   
-112   128    
144    0      
-16    64     
-224   -16    
160    -176   
-32    -192   
-160   -48    
-1168  -16    
32     144    
-80    128    
128    -112   
-128   -144   
-32    -544   
128    128    
112    -64    
-448   -48    
480    -48    
0      -160   
-160   -64    
48     -32    
-96    -32    
32     -64    
-96    -16    
-96    -304   
-32    -256   
16     -320   
-128   -48    
192    -224   
-16    64     
240    -1216  
-64    176    
224    304    
-144   144    
-176   48     
80     80     
-16    -96    
160    -48    
-144   -96    
224    -48    
-1728  -48    
64     -96    
176    -160   
-128   -288   
304    0      
112    -1072  
-128   64     
64     96     
48     64     
-96    80     
80     -16    
-208   -16    
272    -16    
-112   112    
-112   -48    
-96    176    
160    256    
64     16     
192    -80    
-16    16     
32     -384   
-32    128    
160    128    
16     80     
-528   -32    
-112   -128   
288    32     
160    -48    
-64    48     
32     16     
-96    32     
304    272    
32     112    
-16    -176   
224    208    
-64    -432   
256    64     
-224   0      
192    0      
-160   0      
96     -16    
-224   -32    
384    80     
-256   48     
48     -144   
-48    -16    
224    -112   
-112   0      
-80    -448   
176    -304   
-1072  -80    
512    80     
-208   16     
-352   208    
-16    208    
0      64     
96     -96    
128    -80    
-64    -64    
16     -112   
-32    -48    
-768   32     
-112   192    
-192   48     
-96    144    
-208   -80    
-240   -256   
96     -32    
-320   32     
0      80     
-672   16     
-48    144    
224    -32    
-144   96     
-400   -48    
-16    48     
-160   -512   
-240   -320   
-240   -320   
16     320    
-128   528    
-288   368    
-160   16     
0      512    
-256   96     
-272   -304   
-160   48     
-1216  -48    
-144   112    
224    144    
-240   240    
-80    -288   
-240   -496   
208    -224   
-224   192    
240    416    
-128   0      
64     272    
32     64     
-64    -240   
32     32     
-80    288    
192    -32    
64     144    
-96    128    
64     -192   
-144   -80    
32     16     
-96    -112   
48     48     
-96    -32    
-128   -288   
-64    -272   
-16    -96    
144    -256   
-240   16     
224    32     
-416   -64    
-64    144    
-288   0      
-160   96     
64     -16    
64     64     
96     128    
-144   32     
-48    64     
32     -16    
-96    64     
-32    32     
-64    48     
-144   48     
112    48     
-736   -256   
240    -304   
-464   -80    
96     0      
-32    -256   
64     -256   
96     -112   
-176   64     
144    -32    
-112   192    
48     32     
16     96     
-144   -128   
-16    -128   
0      -176   
-160   -288   
256    0      
-256   80     
128    144    
-416   -48    
-144   -32    
80     -64    
-176   0      
272    -32    
-16    48     
160    0      
-144   96     
0      -32    
48     -64    
0      96     
-64    -96    
128    928    
-208   224    
80     144    
-1664  272    
-208   -64    
64     0      
0      48     
32     48     
48     -64    
-224   112    
240    160    
-208   432    
-144   32     
160    32     
-144   16     
128    96     
-208   0      
128    96     
0      0      
48     -464   
16     -16    
64     480    
48     112    
-48    -64    
112    336    
-144   16     
48     -176   
16     192    
96     0      
-416   -304   
208    1200   
-48    -96    
-16    720    
16     -32    
240    256    
-112   80     
0      304    
64     192    
32     -144   
0      256    
64     272    
-80    -192   
0      96     
96     -64    
-48    0      
112    -144   
-80    -16    
208    464    
48     192    
-208   -320   
144    -32    
-96    64     
96     192    
0      64     
-48    -80    
32     -304   
160    -144   
-128   -96    
96     160    
-160   -16    
576    592    
-464   752    
-16    384    
-16    -32    
16     -64    
-80    -48    
48     -112   
192    -16    
-80    -80    
-208   96     
-16    64     
-80    48     
128    48     
16     160    
-112   -80    
128    -32    
192    176    
-32    -48    
-32    -16    
640    384    
-816   176    
176    -192   
0      192    
-48    32     
272    176    
-416   64     
448    208    
-608   32     
288    80     
-240   -32    
112    -1488  
64     112    
112    80     
-16    144    
96     64     
192    144    
-144   224    
128    160    
-96    0      
128    112    
144    192    
-288   224    
32     0      
32     112    
192    -112   
-32    -272   
304    -160   
112    -16    
80     160    
432    352    
-384   64     
144    80     
0      144    
0      112    
-80    64     
-48    176    
64     160    
160    320    
-112   112    
-16    48     
48     0      
96     96     
32     -192   
-16    48     
64     80     
256    128    
-16    64     
128    80     
96     32     
-32    16     
16     160    
208    32     
-32    -32    
128    144    
160    80     
16     -48    
0      208    
0      -1296  
96     0      
112    64     
-48    48     
16     32     
64     64     
16     48     
-32    -32    
80     -240   
0      -64    
32     -128   
32     64     
32     96     
-96    -416   
32     80     
80     -224   
32     64     
0      96     
-48    -48    
176    160    
16     16     
336    464    
-432   32     
-96    96     
320    160    
-128   48     
48     -112   
-32    192    
-64    -240   
128    128    
0      -16    
32     -48    
160    -320   
-32    192    
-48    32     
32     64     
16     -32    
-16    0      
128    112    
80     64     
-64    32     
384    176    
-224   240    
-80    -96    
64     144    
-16    -160   
48     96     
-64    -128   
224    192    
112    -1264  
-48    144    
16     16     
288    256    
-208   80     
64     160    
32     -32    
-16    -32    
160    256    
-160   -240   
64     96     
32     -144   
160    96     
-112   96     
144    80     
128    -592   
-32    112    
256    208    
-224   128    
-64    -32    
112    -160   
272    144    
-224   -272   
-64    144    
400    -208   
-128   32     
128    -16    
432    272    
-368   -48    
112    48     
224    -240   
32     176    
224    64     
-96    144    
80     48     
-64    -176   
336    -32    
-192   -64    
80     160    
96     -48    
-112   -80    
112    -352   
112    96     
112    -240   
-144   48     
128    -240   
112    -1184  
256    272    
-32    -432   
-16    0      
80     16     
-64    -720   
-16    -144   
224    -64    
-96    -64    
0      -48    
80     -128   
-48    -80    
272    -224   
272    32     
32     272    
-128   -336   
192    176    
224    -368   
-32    -304   
160    -144   
-32    -64    
288    -112   
16     -256   
224    192    
32     -624   
496    448    
-128   400    
-112   -208   
32     -304   
-16    16     
-32    -192   
96     -48    
-80    -176   
176    -112   
-160   -64    
192    -96    
-272   -400   
-112   -512   
192    -208   
-96    -608   
112    16     
128    -688   
-288   -224   
-144   -432   
-96    -64    
-160   -304   
496    560    
-352   432    
176    288    
-96    0      
128    0      
-576   -368   
160    16     
-112   240    
-32    336    
160    -432   
64     -816   
-32    0      
144    -80    
-16    32     
112    32     
112    -80    
112    272    
-176   16     
240    -304   
304    192    
-496   -448   
80     -16    
0      64     
48     -80    
-608   -96    
-112   -464   
-160   128    
-272   -320   
320    64     
-64    -112   
256    -64    
-160   144    
96     -288   
64     448    
-48    144    
-32    -240   
32     -64    
-816   -144   
-64    -256   
128    16     
0      -128   
48     64     
80     -480   
0      160    
0      208    
-80    32     
48     0      
256    160    
-80    352    
-352   -432   
-832   -352   
160    -32    
-528   -160   
96     -160   
160    32     
-32    128    
0      176    
288    144    
160    496    
-16    336    
64     16     
-160   128    
96     -240   
-384   -128   
400    112    
-304   160    
-32    -208   
16     -64    
112    784    
144    80     
-96    -368   
80     400    
-128   -304   
320    96     
-352   32     
128    48     
-144   0      
80     32     
-208   -64    
-64    0      
-32    16     
16     -16    
-32    32     
-80    -288   
448    320    
-160   -416   
-160   -272   
496    -64    
-288   240    
96     80     
-32    -192   
-176   -144   
240    -112   
-96    80     
112    -32    
256    320    
-16    592    
-304   -48    
272    336    
96     304    
-608   -144   
112    112    
-176   -112   
-512   -96    
-80    -80    
-688   144    
0      -80    
-64    400    
64     112    
-32    -64    
32     192    
-32    -144   
-16    112    
80     352    
-96    848    
96     416    
-320   -256   
32     -416   
32     -32    
32     1008   
-144   -576   
-16    -432   
-256   224    
-208   80     
-256   32     
0      96     
48     128    
0      -48    
-48    128    
-128   -48    
32     96     
-176   -144   
48     48     
-144   64     
-176   -64    
32     0      
0      128    
-32    -80    
-112   384    
-816   -96    
-80    -176   
-96    -16    
64     256    
-32    -304   
80     80     
64     -80    
-96    48     
320    -176   
16     -32    
-160   -320   
-96    -224   
-16    112    
-176   80     
-144   144    
-80    48     
304    176    
-1984  -128   
384    400    
-560   -16    
144    16     
32     -48    
128    48     
-48    112    
-320   64     
-32    -96    
-112   -96    
512    592    
-784   112    
32     -144   
32     -32    
-48    208    
-864   80     
-176   16     
192    80     
80     192    
-48    64     
208    16     
-416   -720   
-48    -384   
224    208    
32     48     
-32    32     
256    112    
16     144    
-48    0      
0      96     
-256   -176   
0      80     
208    32     
-144   96     
-80    96     
-32    64     
-32    0      
80     -80    
16     -144   
-192   112    
64     48     
-16    0      
-112   176    
-144   160    
16     96     
-160   352    
16     144    
-304   -128   
16     144    
-416   -48    
-32    240    
304    112    
-64    272    
-16    160    
-112   80     
-48    208    
-96    32     
32     96     
48     -80    
-96    32     
-112   -144   
128    48     
-112   80     
64     272    
-176   96     
-48    48     
96     -80    
-272   0      
176    96     
-224   128    
48     48     
-48    128    
64     32     
-112   0      
160    48     
-32    -144   
208    0      
80     0      
48     48     
80     48     
-32    0      
32     112    
-160   112    
-96    144    
224    112    
-96    64     
32     80     
32     128    
-112   80     
-32    48     
0      -80    
64     80     
208    64     
64     64     
-32    16     
16     48     
0      32     
64     0      
0      144    
192    336    
240    96     
-384   -48    
64     144    
-16    16     
-64    96     
-64    32     
80     144    
352    192    
-400   48     
368    128    
-400   -256   
96     128    
224    160    
-96    16     
64     112    
-144   96     
-32    16     
32     176    
0      -16    
208    176    
0      192    
-80    32     
96     64     
112    80     
16     320    
64     208    
32     -16    
64     176    
112    16     
-288   32     
176    144    
-16    64     
160    96     
-48    -32    
-16    64     
-80    112    
112    -16    
48     128    
-64    -208   
240    -96    
32     32     
32     112    
-32    32     
160    80     
16     64     
80     96     
-144   -16    
64     -16    
-32    -176   
-48    -320   
176    128    
80     32     
0      32     
80     -32    
32     96     
96     16     
16     48     
-96    -96    
-80    0      
144    48     
96     128    
-80    32     
112    64     
16     48     
-112   -32    
176    64     
160    208    
-160   48     
112    32     
-32    272    
240    128    
-96    112    
-16    16     
64     48     
-288   -16    
272    64     
336    176    
-272   272    
32     112    
96     -96    
48     320    
304    -2304  
-240   -48    
64     352    
352    160    
-208   -256   
80     128    
0      224    
-240   -304   
176    16     
-112   208    
-112   64     
48     144    
32     48     
144    -256   
32     48     
176    -240   
64     0      
112    32     
96     -64    
208    112    
64     256    
-64    -224   
192    -16    
-144   -128   
128    -32    
-112   -144   
-160   -384   
-176   -432   
-128   -672   
-80    0      
80     16     
-144   16     
224    -800   
0      96     
-32    -544   
320    160    
-48    96     
-16    320    
144    -96    
32     64     
48     128    
-80    -16    
-128   -384   
-176   -416   
336    464    
-176   -96    
-160   -624   
64     -304   
304    496    
-176   -416   
112    0      
160    272    
-32    208    
-112   -176   
384    432    
-432   240    
336    64     
-288   80     
112    -304   
80     176    
128    -112   
64     -32    
80     -528   
-304   -64    
-128   496    
48     -176   
-448   -192   
288    176    
-64    160    
-64    240    
-32    -224   
-32    240    
-80    208    
32     -1264  
160    -112   
208    256    
-32    352    
-48    -304   
224    -432   
112    128    
32     336    
-80    -144   
128    208    
32     192    
48     -336   
0      48     
-96    -288   
480    224    
-256   112    
-272   -512   
368    -448   
-16    240    
96     -224   
128    96     
-192   -672   
400    96     
-112   64     
48     -224   
208    0      
-64    64     
272    0      
0      272    
-80    -176   
-336   -576   
112    -112   
176    -64    
-176   624    
176    -32    
112    -752   
-128   336    
176    -144   
-80    -48    
176    -272   
128    -256   
-768   112    
80     -848   
-48    -720   
192    -192   
0      288    
-16    -320   
192    -208   
0      112    
400    288    
-192   -240   
96     352    
-144   -288   
400    32     
-32    624    
80     48     
-160   16     
-64    -128   
-32    -48    
-64    -688   
368    -112   
0      -560   
48     -96    
48     176    
96     -16    
16     -112   
160    16     
80     -192   
160    0      
-304   -240   
224    -208   
-528   -544   
176    -112   
160    384    
-304   -624   
416    -432   
64     688    
-112   64     
16     -1024  
0      240    
48     -304   
80     -144   
240    48     
144    496    
-208   -160   
304    112    
-208   32     
16     -592   
-720   176    
256    112    
-48    -48    
144    -192   
176    -96    
96     -480   
-112   -160   
80     -16    
-96    0      
32     -176   
144    32     
-80    624    
96     -144   
-320   -176   
32     -192   
256    368    
-128   16     
128    -64    
-96    -64    
144    -144   
-32    -304   
16     -64    
80     -384   
0      32     
-192   -464   
208    -144   
64     -64    
-80    -160   
64     0      
-32    208    
-112   192    
-128   -208   
-768   -368   
32     -416   
64     16     
-16    -160   
224    144    
32     -336   
112    176    
-64    16     
112    -16    
0      0      
80     144    
-320   0      
-80    -32    
160    112    
-96    -160   
112    0      
112    -32    
128    96     
16     -112   
112    80     
-16    -768   
-160   16     
-352   -96    
384    -16    
-576   0      
112    0      
-224   16     
32     -80    
-368   352    
80     -32    
80     64     
112    160    
-64    -192   
-64    -96    
336    80     
-160   -352   
144    80     
-16    48     
48     32     
-64    80     
128    -208   
-272   112    
416    336    
-48    240    
0      128    
-16    16     
-144   -48    
-160   -64    
-640   -160   
160    160    
-96    48     
-80    16     
48     16     
-1104  0      
-128   -80    
48     -288   
0      -160   
96     -32    
32     16     
-640   -144   
48     -112   
-240   -384   
-32    -112   
-96    -160   
128    320    
144    192    
-64    240    
-192   176    
-144   176    
-144   32     
240    304    
-192   160    
48     -48    
0      -80    
256    48     
-48    48     
-128   -80    
-96    -16    
-240   -208   
-208   -288   
0      -48    
-16    -96    
64     -208   
112    112    
384    128    
-240   64     
64     112    
-208   16     
64     32     
-192   16     
48     0      
-32    -112   
112    64     
-32    -48    
128    80     
-96    48     
64     64     
128    48     
-256   -112   
192    -48    
32     -16    
-128   -288   
-192   160    
192    144    
-1360  0      
176    48     
-80    -144   
-80    16     
-32    -128   
-32    -64    
48     96     
192    48     
-256   -208   
32     96     
0      48     
-288   -80    
144    112    
-96    80     
288    112    
-560   -128   
0      64     
-48    -256   
-96    80     
128    96     
-96    64     
48     64     
0      64     
-128   80     
32     128    
0      64     
-208   -320   
240    32     
-144   80     
96     48     
-320   -48    
0      48     
-16    64     
-80    0      
256    80     
-144   48     
128    32     
-240   0      
224    144    
-80    96     
16     96     
0      176    
128    192    
-400   96     
144    112    
-368   -336   
128    -144   
80     16     
-112   64     
-96    32     
64     -32    
16     64     
32     464    
-64    128    
-32    -112   
16     -48    
32     -16    
-112   96     
-160   -64    
32     192    
-80    -80    
144    144    
-464   -80    
-272   48     
144    192    
32     64     
96     64     
128    64     
0      -48    
48     464    
16     464    
-176   32     
272    432    
-304   32     
128    288    
-112   -112   
-80    -32    
0      128    
96     160    
16     304    
96     -16    
-96    32     
-16    64     
96     144    
64     -16    
-64    192    
80     304    
-80    -272   
-128   -192   
96     192    
-208   64     
-32    192    
144    64     
-176   -336   
96     -64    
64     96     
-32    208    
-128   384    
48     -496   
-16    384    
32     -576   
64     -208   
32     496    
-320   128    
384    720    
-336   -128   
0      -64    
32     -48    
-48    64     
-64    112    
48     96     
0      448    
0      -528   
-48    144    
336    784    
-480   -144   
-32    -688   
96     256    
16     16     
80     80     
-240   -128   
336    48     
-256   416    
192    -272   
112    240    
160    128    
512    160    
-112   336    
208    96     
-128   160    
-64    16     
80     -16    
-48    48     
-112   -48    
-192   160    
320    48     
-80    160    
208    144    
-96    208    
-64    192    
672    512    
-320   320    
-176   -64    
-400   -160   
128    -304   
-32    -16    
176    -176   
448    240    
112    384    
-64    0      
16     96     
224    -80    
16     192    
320    48     
32     64     
144    256    
0      64     
-240   176    
656    0      
-208   144    
336    624    
480    336    
-384   96     
208    -400   
96     -496   
336    624    
-160   720    
400    -528   
80     592    
-16    -48    
192    -144   
64     304    
-48    160    
112    -48    
128    -128   
64     320    
-112   144    
48     -64    
-160   192    
-128   16     
160    128    
-144   -416   
-112   -16    
176    224    
128    416    
-240   -448   
192    -16    
80     256    
-128   -64    
-112   -128   
304    384    
-288   80     
192    -112   
80     176    
0      -32    
160    64     
-16    -864   
48     64     
64     16     
0      -192   
-160   384    
96     -320   
96     336    
736    960    
-832   144    
128    -976   
192    464    
-144   -16    
288    -416   
-32    288    
192    -128   
240    608    
-160   64     
32     -816   
32     496    
304    -240   
-320   400    
64     -144   
80     -48    
-128   -16    
64     128    
-112   -368   
208    -192   
32     160    
64     -112   
-16    384    
48     -224   
16     48     
64     -592   
-16    -224   
-32    352    
352    128    
64     48     
-16    80     
-80    64     
128    96     
-80    48     
16     -128   
48     96     
-64    -128   
256    480    
80     272    
-240   128    
368    192    
-64    224    
-64    -400   
192    288    
16     80     
128    288    
160    432    
80     240    
0      80     
112    432    
112    240    
-112   160    
256    32     
-64    -304   
48     16     
112    48     
0      224    
-16    80     
144    160    
-64    -128   
160    32     
64     -32    
80     -96    
-160   64     
144    -160   
-16    240    
48     -208   
0      96     
-144   -32    
272    160    
-128   -80    
192    64     
-32    -448   
-64    128    
-144   128    
80     240    
-144   96     
48     80     
-64    -192   
16     -176   
-80    -672   
304    -192   
-160   80     
224    0      
48     112    
-48    -160   
80     192    
192    352    
-80    -16    
-160   32     
496    -256   
-256   -352   
304    -192   
-48    -304   
352    240    
-128   -224   
-112   64     
48     144    
-16    80     
144    80     
16     -144   
112    -160   
16     16     
64     -64    
48     -16    
128    -16    
-80    -48    
-1296  0      
-16    -288   
-48    144    
240    288    
-336   -96    
176    -560   
-96    -224   
-240   -32    
240    -32    
-256   -48    
160    16     
80     -48    
48     32     
64     144    
16     80     
-160   96     
-80    -48    
208    -16    
0      -128   
-16    -128   
144    0      
176    64     
224    -160   
464    384    
-368   -96    
128    -288   
-48    -384   
48     -224   
-208   -96    
112    -464   
-176   -224   
-112   144    
-800   448    
-144   144    
-32    64     
-288   -48    
48     80     
-32    48     
-48    16     
-80    -240   
64     -160   
400    160    
0      -96    
144    432    
112    80     
-528   -32    
-16    -352   
-368   -112   
176    -128   
96     112    
-144   0      
-32    64     
240    -288   
48     128    
-32    -1200  
64     112    
176    16     
144    64     
-272   -128   
208    80     
-96    -32    
-16    48     
16     48     
16     96     
-368   -16    
80     16     
80     -64    
80     -208   
-192   0      
256    -672   
-64    160    
-128   -32    
-80    -272   
112    -16    
112    -64    
-96    32     
208    112    
-176   48     
160    32     
32     128    
-64    -112   
272    272    
-320   -128   
-64    128    
272    -448   
32     80     
-16    -64    
-16    -176   
-16    0      
-48    112    
-48    -32    
160    80     
-112   -32    
32     32     
-384   -32    
-128   -16    
112    64     
32     -48    
144    144    
80     -224   
-64    -96    
-160   -128   
192    48     
-32    48     
64     80     
-256   16     
112    16     
80     64     
-80    0      
32     -80    
112    16     
64     128    
-1120  -176   
-48    48     
-560   -208   
-800   96     
192    96     
-1104  -48    
48     80     
80     -160   
-144   16     
96     -64    
-128   80     
208    32     
80     144    
-1280  -64    
256    64     
-592   -304   
0      48     
32     -96    
-352   -96    
160    160    
64     496    
-144   368    
-1488  176    
-128   80     
-64    -128   
160    112    
0      320    
-80    192    
48     -176   
112    96     
-192   -272   
32     160    
144    80     
-128   -16    
-144   -224   
144    224    
-208   48     
-96    -288   
128    -16    
-208   112    
-176   -320   
0      608    
0      -288   
192    576    
-128   688    
144    272    
-352   112    
-224   -640   
-32    48     
112    368    
-352   96     
112    32     
-112   128    
-32    96     
-416   -160   
-48    -48    
304    -48    
-48    144    
320    384    
64     432    
-208   -240   
32     -48    
-64    64     
16     0      
0      112    
32     64     
-16    64     
32     352    
-240   272    
160    -288   
-304   -16    
-448   -144   
-32    16     
-64    0      
176    224    
-96    -80    
-80    384    
-192   -64    
48     -80    
16     176    
-224   0      
-64    96     
-192   48     
-96    96     
144    -64    
-272   32     
-64    -208   
64     352    
176    288    
320    240    
-256   80     
192    -32    
48     -64    
48     112    
48     48     
-160   32     
-272   -80    
96     -16    
128    176    
-32    160    
-32    176    
80     240    
-80    112    
-832   0      
192    208    
80     224    
96     -32    
-112   48     
-336   -336   
-128   -240   
-192   -272   
-80    -336   
-128   -80    
176    320    
-480   -304   
-160   -96    
-288   -320   
256    -48    
-1088  624    
192    176    
144    176    
-352   64     
112    80     
-160   -32    
112    -32    
-160   -160   
112    112    
144    16     
176    304    
-224   -144   
80     -16    
192    208    
0      0      
48     288    
-176   -16    
80     176    
-16    800    
416    400    
-240   -176   
-64    -16    
128    32     
-160   -128   
-64    -160   
192    160    
-224   208    
368    16     
-416   -496   
832    -368   
-224   1440   
208    -640   
128    -112   
16     560    
80     -80    
-112   176    
-192   -32    
-112   -64    
160    176    
-224   -736   
112    352    
128    336    
112    208    
-80    -352   
-80    64     
128    560    
-272   384    
-16    -160   
-112   -304   
96     16     
-64    -32    
112    -48    
-192   -128   
80     -336   
80     240    
368    96     
-448   -688   
240    -32    
160    208    
-288   -448   
128    -320   
272    240    
112    176    
0      112    
112    32     
64     -208   
192    -64    
96     208    
144    144    
-16    112    
128    -32    
-240   -288   
288    64     
-112   48     
240    128    
-144   -64    
0      -112   
48     -288   
-80    -192   
288    -48    
-96    64     
16     16     
-32    32     
240    208    
-288   128    
16     192    
224    384    
-144   288    
96     288    
-208   144    
64     80     
48     240    
64     144    
-64    -128   
-64    0      
288    176    
-224   80     
192    144    
-208   48     
-16    64     
176    128    
-16    32     
-80    -304   
-32    112    
208    0      
-176   128    
64     80     
-16    144    
-64    16     
192    192    
-16    -32    
-80    96     
48     32     
0      64     
64     96     
80     -176   
-112   128    
32     -352   
-208   160    
160    -224   
80     16     
-48    80     
112    64     
-128   32     
32     64     
128    176    
-224   -64    
96     64     
112    80     
-144   -80    
0      64     
96     96     
-32    -160   
0      112    
80     -288   
160    192    
-192   128    
64     160    
224    112    
-32    176    
96     240    
208    272    
-16    -64    
272    208    
-160   112    
-144   96     
16     64     
80     -224   
64     -64    
-16    -160   
176    -16    
128    -560   
320    240    
-48    240    
16     128    
96     -48    
352    192    
-272   32     
-48    112    
-96    192    
256    128    
-192   144    
96     -64    
320    208    
-240   -336   
160    -128   
-16    -672   
336    224    
-144   -128   
-128   96     
16     -32    
-16    64     
0      -48    
16     64     
144    -48    
-112   -304   
304    144    
80     64     
64     80     
-112   -32    
112    96     
-144   -192   
-16    -64    
0      -1440  
144    192    
320    400    
-384   64     
64     144    
320    480    
48     304    
-48    -96    
32     112    
240    96     
-224   48     
-16    -144   
144    -16    
80     -240   
-48    -32    
-144   -128   
352    112    
-96    32     
48     32     
176    144    
144    224    
-112   64     
80     -16    
288    224    
-112   -128   
192    176    
0      -224   
0      48     
80     -192   
-80    -32    
96     -1584  
64     160    
-96    128    
208    16     
-160   48     
176    0      
-48    -80    
-32    -48    
128    144    
48     -80    
48     96     
-16    -32    
-16    112    
64     16     
0      -48    
320    0      
176    -2048  
-112   48     
144    -768   
48     -480   
-64    144    
144    -304   
0      -32    
64     -1488  
16     -16    
96     48     
96     32     
144    160    
-64    48     
96     128    
-16    16     
96     -208   
-224   -16    
208    -32    
304    -272   
-768   -64    
-16    -240   
80     -48    
16     -592   
144    48     
192    -848   
-80    -112   
80     128    
-16    -176   
80     -560   
224    336    
-272   -208   
-16    -352   
-80    -48    
144    -112   
-720   -256   
48     -48    
112    -160   
112    -32    
-48    -64    
32     128    
48     -48    
16     -224   
-16    -16    
48     -144   
64     224    
48     208    
192    1200   
48     -176   
-272   -1040  
112    928    
-48    -96    
16     -208   
112    240    
-112   -48    
64     -528   
80     -48    
128    -656   
64     64     
0      48     
32     32     
64     16     
-16    80     
-352   -128   
0      -1120  
144    32     
-96    48     
64     -480   
-16    384    
128    -64    
128    80     
96     16     
16     -480   
16     112    
32     -464   
-48    144    
48     -288   
48     80     
-224   -416   
112    -656   
96     496    
-80    352    
-192   -176   
160    48     
-464   0      
160    32     
-96    -16    
192    -608   
32     368    
16     -96    
64     -224   
-48    -96    
16     -144   
-16    -112   
-48    -48    
208    224    
-160   256    
48     64     
-16    16     
-336   -32    
128    -416   
-48    -224   
160    -336   
32     144    
192    -528   
-96    80     
48     -48    
64     384    
-256   -16    
-144   -160   
-80    0      
-16    -48    
-96    0      
112    -48    
-48    0      
-16    -288   
128    768    
400    256    
-224   144    
304    -336   
-208   -128   
-80    16     
-112   -80    
-192   -368   
240    -32    
16     192    
-16    -32    
-32    176    
144    208    
-320   -112   
32     -16    
160    -64    
-304   -176   
-112   -256   
-848   -416   
512    16     
-272   -144   
112    272    
-16    112    
-224   -128   
-144   208    
144    -16    
16     176    
-224   -400   
48     80     
-192   -48    
-160   -240   
-384   -16    
48     528    
32     32     
-176   -48    
0      -144   
-464   16     
-80    -48    
-720   -160   
-144   -80    
-64    192    
208    272    
-352   16     
256    -80    
-176   -64    
-32    48     
-416   -224   
192    -144   
-64    -16    
-48    592    
-16    896    
-128   -336   
-48    64     
-240   32     
48     16     
-256   -112   
-80    -64    
368    464    
-448   -560   
112    -384   
-112   -176   
32     -592   
32     -192   
128    800    
48     96     
-304   -672   
-32    -48    
80     176    
-384   624    
384    912    
-176   176    
-208   -48    
-32    -320   
-176   -288   
-224   -448   
160    -96    
144    208    
-464   -32    
-160   128    
32     -128   
-304   -640   
-160   -416   
96     -48    
-128   64     
-48    -16    
-240   -336   
0      -128   
-1200  -128   
288    128    
80     -80    
96     32     
-96    16     
112    0      
48     -16    
-176   -80    
-16    -208   
176    16     
320    256    
-256   176    
-32    416    
112    64     
-256   -80    
-224   -16    
80     96     
-144   48     
96     0      
-224   0      
48     -96    
0      80     
-48    -384   
320    0      
48     128    
176    96     
-272   -112   
80     16     
-112   -48    
48     144    
-320   128    
-32    144    
-336   -128   
80     -112   
0      64     
128    80     
-64    -16    
64     -48    
-16    48     
-96    16     
48     -32    
-208   32     
112    80     
-160   32     
48     -16    
-400   -16    
288    144    
-400   -160   
-16    48     
48     128    
-192   96     
224    48     
-96    80     
96     448    
16     -64    
16     96     
176    208    
16     32     
-208   -16    
176    272    
-240   16     
0      64     
128    64     
-80    16     
32     128    
-64    48     
0      -16    
-16    0      
64     48     
-128   48     
96     160    
32     48     
-96    96     
96     144    
48     96     
-176   32     
176    96     
-16    32     
-48    32     
-80    32     
80     80     
0      -64    
48     32     
0      80     
-128   -16    
16     80     
-112   -48    
80     112    
-208   48     
64     64     
-208   32     
208    32     
-64    -48    
-48    -80    
176    -96    
32     32     
160    112    
0      32     
-224   112    
-64    80     
-16    48     
-80    -144   
160    -448   
-48    -144   
256    112    
-176   -32    
16     96     
32     32     
-64    -80    
96     -48    
0      64     
112    144    
-80    96     
96     32     
16     80     
80     128    
0      96     
208    48     
-64    32     
0      160    
0      144    
48     64     
-16    160    
-112   64     
-32    -16    
176    96     
-96    64     
64     -48    
80     96     
32     80     
-80    -64    
112    96     
160    16     
0      -64    
96     144    
96     144    
-48    16     
144    176    
0      112    
-80    160    
144    192    
80     160    
16     16     
-112   224    
112    16     
-160   64     
-32    -16    
16     128    
-160   224    
112    -64    
-80    32     
-112   80     
288    -48    
-80    80     
176    192    
-16    16     
-80    -112   
336    -80    
16     240    
-32    64     
176    80     
96     496    
-176   64     
-96    0      
112    -96    
-16    96     
-48    0      
160    128    
-80    64     
112    112    
0      -48    
32     -16    
144    96     
-64    96     
32     48     
32     96     
-80    64     
96     64     
32     48     
192    -320   
-48    32     
288    -608   
-224   224    
48     176    
-208   -48    
64     -80    
176    80     
-80    80     
32     -48    
-32    -80    
112    -48    
-16    16     
48     112    
0      160    
-80    -240   
64     208    
192    -368   
352    96     
64     96     
-128   64     
144    96     
-32    64     
96     112    
64     240    
32     80     
-128   48     
-160   16     
112    176    
-128   320    
128    64     
256    -128   
144    -672   
-32    224    
160    -768   
-16    272    
272    352    
-208   32     
48     -176   
80     208    
208    240    
-96    80     
-16    128    
-112   0      
208    -352   
96     80     
-144   128    
16     -224   
192    -48    
-128   240    
192    272    
-224   -1472  
304    272    
-144   32     
144    176    
32     48     
48     192    
-16    -144   
-80    48     
224    -96    
-352   -320   
352    -304   
0      208    
32     448    
224    112    
32     -112   
-192   -112   
320    128    
-64    0      
112    80     
32     80     
32     96     
32     112    
0      -224   
64     96     
64     -224   
128    144    
112    -256   
48     32     
96     -128   
288    320    
-96    -48    
144    64     
16     -16    
112    80     
-16    -272   
-144   -368   
240    32     
-16    48     
-96    -64    
144    -32    
96     480    
-32    160    
-208   -32    
16     -256   
48     48     
64     -192   
-16    208    
64     32     
128    64     
-208   -64    
160    -80    
16     -768   
64     -16    
128    -1584  
64     -64    
0      256    
-16    0      
112    -80    
-80    -688   
-304   -848   
240    -448   
-224   -704   
-176   -624   
240    -208   
-48    -304   
-400   32     
16     128    
96     -16    
0      -848   
48     -320   
96     -800   
208    -16    
128    96     
-32    -128   
112    -752   
-96    32     
144    -176   
-256   -288   
32     -656   
32     -496   
-448   432    
208    48     
-96    -32    
304    -32    
-96    -80    
0      -272   
160    16     
-80    -144   
48     0      
304    752    
-448   0      
160    -624   
160    144    
128    320    
-48    320    
-64    -368   
16     -608   
-208   176    
-80    -112   
0      -416   
128    -208   
64     -112   
-112   -928   
0      -144   
-64    -16    
-96    -368   
304    160    
32     352    
-208   0      
32     -64    
-16    -528   
176    -656   
-832   -288   
272    -176   
48     -96    
288    -32    
-64    -176   
144    -512   
-112   -400   
160    -208   
16     -16    
-32    -192   
48     112    
-96    208    
-160   0      
-192   160    
192    0      
-144   -368   
192    -480   
-128   -304   
192    -176   
96     -32    
112    -48    
-160   0      
48     -1328  
-32    -32    
-128   -144   
144    0      
-192   -48    
336    432    
-368   160    
0      -160   
-352   -64    
32     320    
-32    16     
208    64     
-656   112    
-144   -432   
-320   -176   
208    -496   
-16    96     
-176   48     
-64    -80    
-48    -80    
176    -16    
-800   -16    
-16    128    
-352   16     
144    464    
-288   -64    
336    -16    
-80    16     
128    -208   
80     32     
160    -416   
64     -48    
16     32     
80     80     
-192   -48    
32     80     
48     0      
144    144    
-112   80     
80     0      
64     -16    
64     -144   
48     -16    
224    0      
-32    176    
224    -32    
-48    -16    
-128   16     
-32    -128   
112    16     
256    432    
-288   272    
48     112    
32     -144   
208    -128   
160    160    
-208   -80    
32     48     
0      -16    
-32    128    
-784   -192   
-1040  -288   
-240   0      
-656   80     
-144   16     
-1088  32     
-112   -16    
0      -112   
32     64     
128    -64    
-144   16     
64     96     
176    96     
-272   -224   
48     256    
208    -16    
-256   -64    
-64    64     
64     96     
-208   0      
-80    96     
-304   0      
288    192    
32     -96    
-128   0      
288    96     
-192   -16    
112    48     
-208   -352   
0      -16    
176    64     
-272   16     
160    48     
-64    0      
208    224    
-416   32     
-64    16     
-48    0      
0      0      
0      -96    
96     128    
16     -176   
160    80     
-80    -304   
16     160    
160    -16    
-112   96     
-48    -128   
-144   96     
64     -112   
-80    144    
-16    -32    
-336   32     
32     16     
-1152  -64    
0      128    
208    80     
-144   160    
48     128    
32     128    
272    128    
-416   160    
64     -336   
-48    -112   
32     128    
176    144    
-160   -16    
-128   80     
-80    16     
-576   32     
176    256    
64     48     
192    -16    
-288   0      
240    -48    
-64    80     
144    160    
-16    80     
-96    80     
128    112    
-208   -80    
240    0      
-320   224    
-144   -96    
16     -48    
-32    48     
-64    -32    
-192   -96    
32     64     
-48    112    
-48    96     
352    256    
-400   128    
0      0      
80     48     
-208   -32    
96     -16    
-112   -48    
224    144    
-320   32     
16     48     
-1728  -192   
208    288    
-208   48     
80     80     
0      32     
96     -16    
-48    48     
-112   32     
176    64     
48     128    
-80    -112   
-64    0      
96     96     
-192   0      
80     32     
-400   16     
-16    0      
160    80     
16     16     
144    16     
-112   48     
592    512    
-480   352    
0      128    
-160   -80    
64     0      
112    32     
-112   288    
-192   112    
-160   192    
240    16     
16     112    
208    160    
-480   -128   
304    -368   
288    -80    
-48    160    
0      176    
144    160    
-96    0      
-64    -256   
-48    -304   
224    176    
-32    192    
-96    192    
16     -48    
160    64     
96     96     
32     256    
-16    16     
176    208    
-160   592    
256    336    
-208   256    
-112   192    
48     128    
-64    48     
128    512    
-96    560    
-160   96     
192    -224   
-144   -208   
32     -208   
-96    -656   
160    -304   
16     32     
208    320    
-32    128    
0      144    
-272   -144   
-80    64     
-64    176    
-48    112    
112    192    
144    224    
-48    -16    
48     176    
176    224    
-272   96     
-112   -1040  
448    -144   
-288   160    
208    48     
64     128    
-112   48     
32     32     
-112   224    
208    64     
64     592    
96     416    
32     -416   
160    384    
-128   192    
64     -32    
128    -240   
-48    48     
-128   -336   
-80    -512   
176    128    
-240   0      
112    -112   
16     176    
-32    -256   
96     32     
-64    160    
64     -32    
-80    -48    
112    80     
-208   48     
144    144    
16     -176   
-48    -432   
16     -32    
208    176    
-224   -96    
160    176    
48     96     
-16    -224   
-32    16     
32     64     
160    64     
-128   64     
96     80     
48     80     
80     80     
0      96     
16     448    
128    368    
64     208    
-160   32     
-32    96     
-32    0      
-32    -256   
176    32     
0      -784   
224    336    
48     240    
128    288    
32     64     
80     -112   
0      -464   
-64    0      
208    272    
-112   112    
-112   48     
240    160    
-32    96     
80     -16    
-112   -288   
32     -384   
288    384    
-32    240    
16     64     
-48    80     
144    128    
48     32     
96     -16    
-112   -128   
272    224    
-304   -384   
-320   -1232  
112    -608   
-80    -288   
0      160    
112    32     
16     144    
16     -1280  
-16    208    
80     -48    
128    80     
16     160    
256    16     
80     -160   
128    272    
-80    16     
0      -128   
112    96     
-96    -144   
64     -384   
48     -464   
288    736    
-320   -1696  
96     272    
144    464    
-224   -464   
144    64     
-48    64     
-128   -1056  
-16    -256   
192    736    
32     256    
0      -64    
48     112    
224    -64    
48     -400   
-80    -80    
112    -80    
16     64     
-96    -1792  
192    0      
-64    96     
-128   -288   
-112   -240   
96     -64    
160    208    
48     336    
176    416    
-48    -400   
288    208    
-112   32     
416    592    
80     32     
-160   -112   
144    -112   
64     -64    
288    112    
-192   96     
272    80     
-688   -352   
432    -416   
0      -544   
96     96     
16     32     
160    144    
-32    32     
-16    160    
272    -32    
-144   -32    
656    304    
-64    192    
288    16     
144    -608   
-80    -16    
48     -208   
64     -1040  
-32    -160   
512    224    
-368   -112   
448    -48    
-80    32     
128    208    
-32    16     
-64    48     
208    16     
-16    -288   
-112   -64    
448    -336   
-80    0      
-944   -224   
-176   48     
288    128    
-112   -704   
96     -144   
128    -848   
144    -96    
-192   304    
-32    -16    
160    192    
0      -48    
272    -272   
208    32     
-64    -160   
128    96     
-1040  -96    
288    -112   
80     -96    
192    -160   
16     -96    
48     -176   
32     64     
128    96     
160    32     
96     -144   
80     48     
80     -64    
80     96     
-176   80     
96     80     
-320   -96    
48     -208   
0      -64    
32     -192   
32     -16    
176    -80    
176    -64    
-160   -912   
96     -16    
-144   -48    
16     64     
176    128    
-112   80     
-176   -64    
176    -48    
-288   -112   
64     -16    
-1408  0      
-96    -80    
80     -32    
96     -128   
-64    -160   
160    -752   
-240   0      
-16    -32    
112    96     
0      0      
144    16     
-208   0      
112    -160   
-80    -16    
80     0      
-160   -16    
32     32     
64     -32    
-48    -32    
0      0      
-32    -48    
240    -32    
-192   -624   
224    112    
-208   -144   
288    -96    
16     48     
-240   -336   
160    -112   
16     -48    
-224   64     
272    -80    
-544   -48    
160    48     
192    64     
-16    -224   
160    -48    
32     -736   
144    80     
-96    -32    
80     -320   
-208   -208   
208    -32    
-272   -128   
-48    -208   
0      -48    
16     -256   
-160   48     
-48    -96    
64     48     
160    -400   
-128   0      
128    -192   
-64    32     
-240   96     
128    96     
-80    -32    
16     16     
-128   -80    
176    0      
-160   -16    
128    -128   
-144   160    
112    -112   
-272   160    
272    -144   
-176   96     
128    64     
64     32     
-128   64     
288    -32    
-96    -48    
64     -144   
-144   48     
160    64     
-224   -128   
64     -128   
160    96     
-128   -144   
256    160    
-304   -208   
-64    272    
-544   0      
-560   -32    
48     -32    
-384   -192   
-272   -32    
240    224    
-384   0      
64     48     
96     144    
272    224    
-272   48     
-400   -128   
192    -48    
-80    -144   
128    128    
-48    -16    
-240   16     
64     32     
-64    32     
-64    48     
-240   -192   
-128   -96    
272    912    
-80    480    
-80    -80    
80     336    
-16    496    
112    192    
-160   -352   
-48    -192   
16     -16    
-16    64     
16     80     
0      80     
-48    144    
112    240    
-144   96     
-608   -80    
96     112    
144    432    
288    976    
-80    336    
-112   -16    
-96    -160   
112    112    
80     80     
-64    0      
432    720    
32     528    
-224   288    
-384   656    
192    704    
-288   544    
-208   272    
-48    -16    
64     -64    
-208   -384   
48     -80    
32     -336   
240    208    
-48    160    
-96    48     
-176   -48    
16     -96    
-32    -160   
128    224    
-320   -432   
48     -240   
48     496    
-1072  640    
160    -400   
-80    48     
208    320    
-112   48     
-80    -480   
304    928    
-128   928    
-176   112    
320    -144   
32     368    
-48    0      
16     -144   
-416   -16    
-48    -144   
-512   48     
128    -112   
240    0      
-160   272    
-144   -128   
224    192    
-64    16     
-16    -48    
0      -32    
96     160    
-288   32     
208    48     
-240   0      
-288   -16    
416    144    
-176   16     
48     64     
-496   -64    
-32    -80    
0      -80    
80     128    
224    112    
336    352    
-288   48     
-80    -192   
0      -144   
0      192    
144    368    
-160   128    
64     176    
-64    -16    
144    -432   
-352   -608   
32     -432   
16     -32    
-48    32     
16     -480   
16     -160   
32     48     
32     448    
160    624    
-32    160    
256    256    
-320   -448   
80     96     
-224   0      
16     -64    
48     112    
256    112    
-208   112    
80     0      
-16    80     
-16    -16    
-32    128    
-48    16     
64     96     
-64    0      
-32    48     
-320   -176   
368    160    
-416   -48    
144    80     
-16    176    
-96    -128   
0      -528   
16     64     
32     64     
80     192    
112    704    
64     320    
-320   -176   
-48    -256   
-64    16     
-96    416    
128    32     
-144   80     
80     64     
-80    -96    
-16    96     
-16    64     
-128   320    
208    48     
-32    448    
-144   16     
256    592    
-240   176    
-240   -560   
112    112    
16     -48    
32     192    
352    848    
-64    1072   
-176   208    
0      -1024  
352    336    
-128   272    
48     128    
-176   16     
32     -48    
176    128    
-192   -144   
-160   -160   
128    -576   
208    288    
176    416    
64     -128   
-112   144    
176    -48    
-112   -112   
16     96     
-32    256    
32     272    
0      128    
128    -32    
-80    48     
-96    128    
112    -80    
160    16     
-112   -96    
240    -384   
224    336    
-208   160    
0      112    
48     96     
64     128    
-32    0      
64     -16    
32     48     
112    96     
32     16     
80     16     
256    368    
-528   128    
208    -224   
-32    -96    
64     224    
-16    208    
112    144    
16     48     
-32    112    
-64    64     
16     -208   
48     112    
48     320    
32     -64    
48     -80    
80     -272   
-80    128    
48     144    
64     -336   
80     80     
-32    -128   
-272   -368   
256    96     
96     208    
32     96     
-64    64     
48     208    
80     -32    
64     -256   
176    64     
240    112    
-80    272    
144    224    
112    48     
64     112    
96     -944   
16     16     
64     16     
-48    80     
80     48     
272    272    
-208   80     
64     80     
-112   16     
16     64     
64     128    
240    144    
-80    112    
112    -48    
-128   32     
0      -720   
352    -224   
272    -592   
-176   -208   
80     32     
-16    -16    
96     80     
-32    144    
80     192    
128    160    
-48    0      
32     -208   
32     128    
112    64     
-240   192    
-48    -112   
16     336    
224    -672   
-144   128    
16     240    
-64    -48    
32     -80    
80     48     
112    160    
192    112    
-128   0      
176    -64    
160    128    
-16    -48    
176    48     
-16    -16    
128    192    
208    32     
64     144    
32     -96    
0      192    
368    192    
-256   128    
32     -32    
80     160    
-96    128    
48     -16    
-64    80     
64     -144   
-64    48     
192    -416   
80     -160   
96     160    
-32    208    
-256   -304   
160    208    
240    -48    
-176   112    
64     32     
80     -80    
-32    64     
48     -240   
224    16     
-256   -176   
160    192    
80     -224   
16     -112   
96     96     
128    96     
-64    -656   
48     112    
176    144    
80     128    
288    240    
-288   16     
0      208    
176    -64    
80     112    
-96    -16    
224    272    
-224   160    
64     160    
96     -80    
-144   48     
256    -112   
160    -208   
16     64     
112    -16    
80     48     
64     -112   
-32    -1264  
64     -112   
-16    -496   
80     32     
112    384    
-176   -96    
0      96     
80     -96    
96     -112   
-16    80     
64     48     
-144   0      
112    -128   
192    -272   
-512   32     
96     -32    
128    0      
80     -112   
64     -64    
16     -464   
32     -48    
80     0      
48     -64    
16     -288   
144    112    
0      -208   
16     80     
-48    32     
144    -128   
-32    -112   
144    -160   
-16    -368   
128    -272   
80     0      
0      -288   
320    112    
-144   -64    
0      720    
112    304    
-160   -96    
32     -176   
-208   -128   
-32    -96    
48     112    
48     -64    
32     -112   
-832   16     
-16    -128   
-16    -192   
96     -432   
48     80     
96     -880   
-560   -368   
112    0      
0      720    
-240   -432   
160    16     
-272   32     
64     -176   
-240   64     
-128   -64    
-848   -80    
112    96     
64     32     
-160   -320   
496    160    
-96    -112   
176    0      
64     -256   
16     144    
144    -144   
32     112    
-64    -384   
-288   -240   
32     176    
-112   -192   
-32    96     
16     -48    
-128   80     
16     -352   
0      -48    
-112   -96    
0      -256   
48     -832   
176    48     
-64    -32    
160    0      
-32    48     
160    464    
-368   -640   
288    352    
-352   240    
272    304    
-944   96     
0      -336   
144    16     
-112   -160   
256    96     
-96    -96    
96     16     
-368   -144   
0      0      
240    32     
256    256    
-448   -496   
-16    32     
0      0      
304    -496   
96     -32    
464    368    
80     496    
304    192    
48     176    
368    -992   
432    400    
-144   400    
352    -208   
-128   16     
96     32     
-192   -16    
96     -272   
64     -224   
368    560    
-320   304    
-80    -608   
192    32     
256    -192   
48     192    
48     -80    
336    480    
-16    160    
176    -464   
160    240    
-160   -48    
-160   -272   
32     -432   
176    432    
160    256    
-192   48     
-1568  -144   
176    32     
-512   -176   
16     160    
480    96     
-560   -32    
16     64     
-432   -64    
-32    80     
-608   -240   
128    0      
48     288    
176    640    
-1328  -320   
-64    -656   
-304   288    
-32    384    
96     48     
48     240    
-96    112    
-352   -80    
320    -32    
-192   464    
16     368    
-96    -976   
-64    224    
-1776  32     
-32    80     
128    304    
-192   -368   
80     176    
32     736    
384    480    
-800   -688   
-176   -1328  
48     -336   
16     432    
-256   544    
400    112    
-96    80     
-192   0      
-448   -32    
32     -32    
-64    32     
32     96     
-48    -64    
0      112    
-128   -176   
-96    16     
192    192    
96     144    
-336   -288   
112    96     
-112   304    
-128   -96    
-80    -48    
240    32     
-64    240    
-624   0      
160    464    
64     -80    
-144   -128   
176    32     
32     320    
-32    368    
-80    -160   
160    48     
48     256    
16     272    
-80    -144   
112    -32    
-16    -64    
32     -128   
-256   -80    
144    544    
-32    272    
16     192    
80     96     
-32    -48    
80     -128   
-256   -128   
-208   16     
160    -32    
-48    464    
80     32     
-192   96     
-64    -128   
-160   112    
-528   16     
16     176    
-80    -192   
320    80     
-256   464    
112    112    
80     80     
-96    0      
0      64     
48     96     
-112   32     
-128   64     
224    32     
-336   -80    
48     128    
64     160    
-112   208    
-256   64     
-192   0      
0      32     
-96    64     
-48    -16    
0      32     
-48    112    
112    -176   
240    -16    
-240   64     
176    32     
-192   32     
160    112    
-336   -144   
128    -48    
-176   48     
-16    48     
-80    -96    
-240   144    
192    -48    
-112   48     
208    32     
-48    -64    
-16    -32    
208    16     
-96    128    
96     32     
-160   96     
-240   -160   
16     48     
112    48     
32     48     
48     144    
-16    96     
-240   -96    
64     -48    
-224   0      
608    672    
-416   720    
-144   480    
208    384    
-464   128    
16     -144   
-176   -144   
64     176    
128    256    
32     -80    
64     -16    
-112   64     
0      144    
176    64     
48     -32    
176    96     
16     -112   
-16    -48    
48     96     
32     64     
176    160    
48     96     
48     128    
-96    80     
48     96     
0      0      
-64    -16    
544    192    
-48    112    
32     240    
176    320    
224    336    
-208   128    
-160   64     
160    -32    
0      144    
48     112    
64     128    
208    64     
-128   48     
160    112    
144    288    
-64    112    
32     80     
128    -16    
128    112    
-128   -16    
112    160    
192    16     
304    352    
-432   64     
144    112    
64     96     
-32    112    
-80    16     
-16    0      
160    80     
0      208    
-80    0      
-16    -112   
96     160    
144    160    
-80    64     
96     80     
-96    368    
224    80     
-192   304    
64     144    
-32    -96    
-96    16     
224    80     
-160   32     
208    64     
-48    96     
128    80     
128    128    
-160   16     
224    64     
-112   -160   
32     -256   
176    64     
128    48     
-32    -1424  
80     144    
64     48     
32     -32    
112    160    
64     112    
32     64     
16     -192   
-112   -208   
96     176    
-80    16     
32     96     
16     144    
80     144    
128    176    
288    -1440  
-80    336    
48     112    
-80    -16    
192    48     
48     128    
48     128    
-144   32     
16     80     
208    160    
-192   -176   
64     64     
192    96     
0      -240   
16     64     
-96    -1200  
32     48     
-64    144    
96     48     
-16    128    
0      256    
-16    -464   
32     96     
160    96     
560    688    
-320   704    
-32    176    
16     176    
48     -416   
64     -144   
-16    -464   
48     -128   
144    -1568  
-48    -16    
96     80     
32     16     
80     224    
160    272    
64     128    
256    304    
-48    368    
160    176    
32     -64    
176    -496   
-32    -144   
112    96     
176    208    
-112   -416   
-48    -304   
0      -576   
32     352    
0      96     
-16    -336   
0      -208   
144    288    
-128   16     
224    0      
48     16     
16     96     
96     560    
-176   -512   
320    368    
-352   -704   
112    -160   
0      -96    
192    48     
32     144    
16     -16    
-16    304    
416    480    
-208   -288   
64     48     
32     208    
128    -256   
-160   -48    
-112   -400   
160    -96    
80     -304   
64     -416   
-80    96     
192    544    
208    560    
-512   224    
-80    -496   
-48    -32    
96     176    
672    512    
-400   112    
48     -544   
480    80     
144    480    
48     304    
176    -128   
0      32     
192    -288   
-112   -1008  
256    -400   
112    -304   
-304   -96    
-48    144    
288    -800   
480    -96    
-240   -1536  
432    -96    
-16    144    
48     96     
256    112    
-64    32     
176    -1040  
-160   160    
48     48     
64     160    
16     -224   
-144   -448   
-528   -224   
112    0      
16     32     
-96    16     
112    -48    
64     -592   
-112   -432   
112    912    
272    320    
-176   -400   
-32    -256   
192    -288   
160    80     
32     -144   
-208   -16    
-192   -368   
144    -128   
96     224    
-32    -288   
240    288    
-176   -432   
400    240    
-112   -224   
-48    -336   
288    -528   
176    400    
464    704    
-272   -368   
64     -112   
416    208    
-352   -144   
464    -48    
-592   -192   
400    -48    
-224   -512   
560    144    
-672   -1120  
304    -1120  
96     656    
-80    -544   
-128   -544   
336    720    
-16    480    
112    -96    
144    240    
-256   -288   
-16    96     
-160   -32    
-288   -128   
288    -160   
64     176    
-64    -288   
352    48     
-128   224    
64     -272   
-144   0      
96     128    
96     -528   
-80    208    
80     -624   
-288   -272   
112    128    
-48    256    
48     320    
32     -48    
-48    -208   
-80    160    
80     -16    
32     48     
-16    -304   
64     80     
-160   -400   
-48    -704   
48     208    
-80    -16    
-96    -368   
384    48     
-256   96     
128    -224   
-944   144    
-112   -256   
176    112    
-32    -176   
80     80     
32     -144   
-48    80     
-128   -48    
176    -176   
-80    -64    
144    96     
-176   256    
32     304    
-64    48     
-16    192    
-32    -32    
80     320    
176    192    
-48    -32    
128    64     
-64    -384   
16     0      
-368   48     
112    176    
32     96     
-256   -16    
304    -80    
256    96     
-224   -32    
-48    -144   
160    32     
80     32     
0      112    
96     -112   
64     144    
-80    -272   
224    64     
-256   48     
64     48     
-256   -48    
112    -112   
-128   -96    
-32    -32    
32     80     
0      -16    
-64    -112   
48     -160   
-80    112    
-208   -96    
-64    64     
80     96     
-288   96     
272    256    
-432   -80    
-32    48     
-48    -32    
112    -64    
256    0      
-64    -112   
48     -16    
-64    -96    
-208   -160   
32     128    
-192   160    
64     272    
-48    64     
-208   64     
-48    64     
32     160    
-32    80     
-608   80     
32     112    
32     -32    
64     144    
48     0      
-304   -192   
144    -48    
192    240    
-240   -96    
-16    80     
16     -48    
-80    -128   
-32    64     
-160   48     
-48    32     
32     352    
-48    160    
-1040  48     
-224   -32    
-992   -128   
0      16     
-544   -368   
192    -160   
-208   64     
-48    -64    
64     -80    
176    160    
112    208    
-384   -48    
16     -176   
32     0      
0      48     
-256   192    
-64    32     
-64    -32    
16     128    
288    48     
-16    128    
112    -160   
128    96     
64     240    
224    256    
144    144    
-16    -144   
176    16     
0      -128   
48     -192   
208    -224   
-16    -224   
-336   -160   
-144   -64    
256    -304   
-160   -512   
-48    -336   
192    -128   
-720   -144   
80     -32    
-272   32     
-288   16     
-32    -32    
-112   112    
-112   -144   
128    208    
96     32     
-336   -224   
-128   -32    
112    -48    
96     128    
64     272    
-16    128    
-304   -256   
48     -128   
48     48     
16     144    
64     -96    
-384   -112   
144    -32    
-208   64     
-96    48     
-256   16     
64     304    
-448   16     
-160   -96    
-48    -192   
256    -144   
0      128    
144    64     
0      32     
80     -16    
96     96     
-80    0      
64     144    
-208   0      
48     176    
64     144    
112    64     
-80    48     
96     96     
-144   -16    
32     -48    
48     48     
48     96     
-96    0      
-48    -80    
128    80     
32     128    
-32    160    
-192   32     
16     96     
-160   -96    
192    80     
112    48     
-176   -64    
-48    -144   
256    192    
64     128    
-176   96     
-112   48     
0      32     
-48    160    
80     144    
112    288    
-144   16     
-16    -16    
-96    -32    
16     -96    
-144   -368   
80     -528   
-64    48     
256    160    
16     48     
-144   80     
112    96     
192    96     
80     96     
-16    32     
64     80     
-176   0      
16     -160   
-288   -256   
176    80     
144    -224   
48     -416   
-32    -96    
128    496    
64     -112   
-112   0      
112    -208   
48     64     
-96    -112   
16     -240   
48     400    
-176   -240   
80     336    
240    496    
-288   -128   
272    256    
-48    16     
144    256    
32     208    
-48    48     
-64    -304   
480    32     
-256   288    
160    0      
-16    80     
96     160    
-32    -112   
112    -96    
96     192    
-32    -48    
144    -448   
64     -416   
400    928    
144    1072   
16     0      
-16    -384   
32     128    
96     112    
0      160    
48     32     
-32    96     
160    -48    
-144   -944   
-32    -32    
64     16     
48     112    
48     112    
96     96     
-32    64     
288    208    
-176   272    
128    192    
144    96     
0      224    
-48    80     
128    112    
-272   -80    
64     544    
368    448    
-224   -128   
768    368    
-960   -48    
-144   -896   
32     -576   
-80    -160   
80     -192   
16     80     
96     304    
144    368    
64     160    
-48    432    
240    288    
-80    -224   
192    -240   
-272   -304   
-32    64     
-128   -16    
352    -48    
-288   80     
256    -32    
-48    272    
32     688    
144    512    
-80    -240   
32     -368   
-96    -400   
-192   -208   
-48    -288   
-288   -304   
176    -1104  
-96    576    
-32    256    
32     -48    
-224   -144   
64     -288   
-272   -688   
240    -352   
224    -32    
-64    640    
-32    208    
-144   208    
320    16     
-432   -608   
48     -352   
16     -112   
32     0      
96     -160   
-160   -128   
480    48     
-224   272    
-80    -80    
-32    1184   
48     -496   
-48    192    
176    -112   
224    32     
-128   144    
384    -272   
208    496    
-224   -384   
16     192    
240    -832   
96     160    
96     -144   
176    112    
96     -128   
112    96     
16     -128   
80     544    
16     -240   
176    -720   
128    688    
-16    -96    
64     96     
128    160    
-32    16     
0      -368   
288    32     
176    144    
96     0      
-240   -208   
320    80     
-176   -48    
224    160    
-32    128    
64     -416   
128    -80    
-160   224    
160    144    
-160   -144   
208    144    
144    -176   
224    128    
-144   128    
160    -80    
176    -192   
-320   -608   
96     -176   
-16    -192   
64     -176   
-112   -160   
64     -32    
48     512    
144    96     
-112   -96    
-16    32     
-80    16     
64     320    
0      -704   
80     -288   
32     -16    
112    -688   
-96    32     
240    -64    
-32    -448   
112    -96    
-16    -304   
-160   -352   
208    112    
-112   -432   
96     -352   
-32    -64    
272    16     
-48    -80    
96     -1184  
-48    -64    
128    -192   
96     -96    
48     -192   
64     -352   
-16    -128   
64     -448   
192    -80    
-48    -784   
384    0      
-16    176    
128    16     
-112   -48    
48     -80    
128    -144   
96     80     
-176   -64    
208    -240   
-320   32     
144    -64    
160    -80    
-16    -528   
208    -112   
32     -16    
-48    -128   
256    -1344  
112    48     
-176   -32    
176    192    
-16    32     
-16    96     
-32    -128   
16     -256   
-144   48     
-80    32     
16     -16    
48     -192   
0      -16    
48     -464   
112    -80    
96     -1024  
-128   32     
80     -128   
-32    32     
-16    -160   
-48    176    
-80    -16    
-144   16     
-256   0      
-48    -80    
-1792  -96    
-112   -240   
288    -144   
96     80     
96     80     
0      -320   
-96    208    
16     32     
64     80     
0      -192   
96     -80    
-32    416    
208    608    
-160   -176   
-160   -624   
-160   -160   
16     -16    
0      128    
176    -64    
80     192    
64     -576   
-16    48     
-16    -2560  
144    192    
-16    0      
-112   32     
144    16     
48     -160   
-128   -112   
32     -80    
-272   16     
16     -32    
-352   32     
96     -160   
-272   -176   
352    -304   
-144   112    
64     -1056  
80     -64    
16     -64    
-48    -352   
64     -128   
160    32     
-48    -16    
480    304    
-112   -80    
160    -80    
96     144    
64     -64    
48     0      
32     -64    
128    32     
-16    -336   
288    128    
-336   -176   
-208   0      
32     0      
-240   -80    
48     -16    
64     48     
-16    48     
144    64     
-224   -48    
96     -96    
160    64     
128    -192   
-64    160    
128    -208   
0      -32    
-32    -16    
192    -224   
-224   -48    
48     48     
-272   -624   
64     16     
-112   -80    
-352   -112   
0      64     
32     -48    
-96    64     
-1584  -48    
-368   -48    
-1488  -256   
176    208    
-416   -32    
96     112    
-48    80     
160    112    
-144   32     
64     -128   
-112   0      
80     48     
-208   64     
-896   -192   
-64    96     
-672   -160   
-48    80     
64     48     
-80    64     
-192   -128   
32     -64    
16     128    
-480   0      
112    176    
32     -16    
48     80     
96     -32    
-16    0      
-32    -240   
48     -80    
-144   -112   
144    192    
-80    80     
-48    16     
112    144    
-304   96     
-128   -272   
-240   -96    
96     -32    
-400   -80    
16     128    
-208   48     
-48    64     
-96    -32    
96     176    
-64    -176   
-80    -16    
160    48     
-64    -16    
112    -48    
-112   48     
224    848    
80     432    
0      400    
-560   -416   
-192   -240   
-144   176    
-48    32     
-32    -112   
448    752    
-400   -336   
-160   -320   
48     -144   
0      256    
-96    272    
64     -512   
-144   368    
48     64     
-176   16     
-256   -32    
-160   -32    
176    80     
-80    128    
80     -80    
144    96     
-112   16     
-112   16     
-16    32     
-112   -240   
208    32     
-112   368    
-160   -128   
48     480    
-48    64     
-96    -128   
80     128    
-320   -80    
-160   -96    
208    -320   
-16    272    
176    0      
192    176    
16     128    
288    192    
-192   336    
64     64     
-96    224    
16     0      
192    144    
-224   272    
192    48     
-320   -16    
112    -64    
-256   -64    
80     160    
176    112    
-96    144    
368    256    
-272   48     
-96    -48    
0      -112   
112    -16    
-192   -912   
-32    -384   
-240   -96    
48     -288   
-320   -384   
144    224    
-208   16     
-96    192    
-32    64     
32     0      
-32    96     
0      80     
48     -16    
-144   64     
192    64     
16     32     
-192   32     
-144   -16    
128    368    
224    704    
-208   448    
-32    -16    
-96    128    
192    80     
-240   48     
-48    112    
-16    -256   
160    -128   
816    768    
-800   32     
-368   -816   
96     -272   
-240   -224   
-48    -176   
-80    -96    
96     64     
16     48     
48     336    
-272   480    
-128   80     
-224   -432   
128    48     
32     352    
-416   -48    
48     32     
-96    80     
-432   -576   
160    -624   
-32    624    
96     1440   
48     128    
-64    -672   
16     48     
-64    96     
112    32     
144    352    
-160   -16    
-208   128    
32     832    
176    784    
-672   -160   
80     -320   
-400   -64    
-160   -240   
96     -160   
224    752    
-400   -784   
-32    -240   
416    48     
80     288    
496    944    
-352   -528   
80     -160   
80     288    
176    144    
-128   -528   
-48    -224   
176    -112   
-112   -144   
208    496    
224    304    
-64    192    
-64    80     
208    -336   
-176   -256   
320    160    
-176   -80    
0      96     
-240   112    
-48    320    
48     -16    
-112   96     
-32    112    
16     128    
64     224    
208    368    
64     160    
96     48     
144    32     
-176   0      
256    -64    
16     -112   
32     -16    
-96    16     
384    128    
-128   144    
-80    160    
-128   32     
112    -512   
48     -160   
80     16     
224    128    
-64    128    
64     144    
48     192    
-112   64     
-160   96     
-96    48     
-80    -224   
0      192    
352    80     
-208   80     
-48    80     
128    80     
112    64     
-32    -576   
144    -16    
-32    64     
-48    48     
256    144    
-208   -32    
80     16     
240    -16    
32     -192   
160    224    
-80    -112   
-32    64     
32     64     
112    -224   
-224   -16    
160    -224   
0      96     
32     64     
144    112    
48     128    
32     128    
16     -144   
64     80     
-16    144    
48     128    
-144   0      
-16    -32    
-64    192    
48     0      
-16    128    
288    -656   
-224   0      
160    -2112  
-16    0      
176    272    
0      112    
-32    -240   
176    112    
-64    160    
32     112    
80     208    
-16    -80    
-144   16     
256    64     
-16    96     
-80    -224   
144    128    
-144   -192   
208    320    
-112   0      
-160   144    
48     64     
176    160    
-192   0      
32     96     
80     96     
-64    -160   
32     64     
-80    -304   
112    32     
112    -240   
-32    176    
64     -560   
224    224    
-144   -1392  
-16    128    
224    64     
0      80     
-32    64     
80     80     
112    128    
-224   -176   
416    128    
-16    -160   
96     160    
176    -256   
112    48     
-48    -128   
96     80     
80     -64    
-64    80     
-144   32     
240    160    
16     -96    
-32    -64    
192    128    
64     112    
80     224    
144    144    
-16    -96    
-80    -256   
80     48     
-16    -336   
128    16     
80     -80    
-48    16     
32     112    
112    -96    
80     96     
-32    -128   
256    480    
-208   -64    
-16    -208   
160    -240   
-112   160    
176    -32    
-80    48     
144    -80    
0      112    
64     -288   
16     -848   
96     0      
-80    -336   
160    -544   
-192   -16    
80     -32    
32     -96    
224    -1008  
-208   -32    
32     -16    
-48    -48    
0      272    
224    -208   
80     -96    
112    112    
-32    -192   
16     80     
112    80     
32     -80    
-48    -64    
208    -288   
80     48     
-32    -656   
-16    48     
256    -304   
160    80     
64     -96    
-64    64     
160    -48    
-48    80     
-32    -128   
-16    32     
-48    48     
-32    -176   
-640   -128   
128    0      
32     -48    
-128   -192   
336    128    
-176   -64    
-176   -352   
304    0      
-160   16     
48     -96    
48     0      
96     16     
128    304    
-96    -16    
176    144    
-256   -64    
-16    144    
96     160    
-240   -32    
64     -16    
32     512    
256    192    
-224   -720   
0      -128   
64     -400   
32     -48    
208    -32    
-128   192    
-80    112    
32     16     
-48    32     
48     -64    
-384   -96    
32     -288   
112    -48    
336    32     
-80    96     
112    -224   
-48    -80    
64     -512   
-80    80     
80     16     
160    -112   
-64    96     
-160   64     
-16    -256   
64     16     
-224   96     
112    208    
224    256    
16     176    
32     -208   
-128   -688   
-16    288    
224    -1408  
-64    256    
-48    -160   
0      448    
-128   -288   
160    -128   
-144   48     
-32    -32    
-112   -224   
-112   160    
-16    -176   
-80    48     
208    -80    
-80    -112   
144    128    
80     -208   
64     176    
-32    144    
64     352    
-80    -16    
112    -48    
-64    176    
128    -32    
-32    96     
96     128    
-240   16     
48     -224   
-128   64     
128    -112   
192    96     
-16    -144   
96     -80    
-304   0      
64     16     
-64    -32    
32     -16    
-16    48     
-64    -16    
80     -16    
-112   -144   
-256   -160   
-16    -144   
176    48     
-240   -160   
128    80     
-32    -176   
-1072  64     
-160   48     
32     -176   
48     16     
128    0      
0      -80    
96     176    
320    304    
-240   208    
176    48     
-896   96     
192    80     
-256   48     
32     32     
-16    -48    
-384   -64    
-176   -192   
-48    0      
-48    208    
-944   80     
-256   32     
240    -96    
-96    -32    
96     -192   
112    112    
320    976    
64     208    
-176   80     
-80    144    
48     64     
-192   48     
-80    -48    
-528   -112   
-112   64     
-496   -144   
-48    160    
-928   -48    
-48    144    
160    -48    
-176   0      
-128   -176   
-48    96     
-80    -176   
-64    -336   
-192   -496   
-112   -144   
32     144    
80     128    
-80    176    
16     48     
-16    -192   
16     224    
-16    224    
-272   -64    
384    1280   
16     736    
-496   -992   
160    96     
-224   368    
-96    -288   
-64    240    
64     208    
-80    -16    
-160   -448   
208    -32    
176    96     
-224   48     
-192   64     
-1520  -192   
-80    320    
0      -64    
128    -416   
-352   64     
32     208    
-112   -208   
-16    0      
112    0      
-144   -128   
48     -144   
-128   -176   
-48    48     
-128   80     
-32    96     
-592   32     
-112   32     
64     -528   
128    -304   
16     -64    
64     16     
16     -112   
144    96     
64     304    
-16    192    
272    416    
-304   -16    
-96    -16    
-368   -272   
384    80     
-144   144    
16     64     
-944   0      
256    160    
-464   -32    
400    -176   
-208   -96    
528    256    
-80    144    
-48    0      
112    96     
304    272    
-544   240    
64     -48    
-96    224    
-208   -144   
-240   160    
144    -112   
-32    0      
-48    48     
-128   32     
0      -16    
-112   16     
112    96     
-80    128    
112    208    
80     96     
-160   -32    
-384   -112   
176    80     
-272   0      
160    64     
48     240    
112    64     
-96    80     
96     64     
-96    128    
-48    -64    
32     144    
128    80     
80     96     
-96    16     
304    176    
-320   48     
0      32     
-144   64     
112    320    
64     0      
-32    16     
240    144    
-144   -48    
64     -96    
272    48     
-96    96     
-64    160    
-64    64     
-112   -96    
32     96     
-32    -48    
176    80     
-80    16     
48     64     
32     16     
-48    -80    
-32    48     
272    80     
-224   -112   
-16    48     
-16    32     
-96    -32    
0      128    
112    0      
-32    16     
-80    -64    
160    160    
-384   -32    
176    96     
-208   64     
176    192    
16     160    
-80    160    
16     128    
192    128    
-112   -96    
-16    96     
160    96     
-32    32     
80     112    
48     48     
-16    80     
-80    -272   
48     112    
128    80     
-80    144    
0      64     
64     176    
112    128    
-176   16     
272    128    
-128   -80    
48     96     
-128   -96    
80     32     
-16    32     
144    224    
-128   144    
48     128    
112    112    
-48    16     
96     16     
32     0      
128    208    
-144   96     
16     160    
96     -32    
64     96     
-32    -32    
48     96     
-16    0      
192    -144   
-112   96     
64     64     
64     -48    
-32    0      
160    144    
-144   176    
-64    -48    
64     64     
64     32     
16     -96    
160    80     
32     0      
176    112    
-64    96     
-48    -336   
400    144    
-112   96     
-48    32     
16     112    
0      64     
-224   48     
368    32     
-80    -112   
192    -64    
-96    96     
224    128    
-64    -16    
80     112    
48     64     
80     -224   
-96    208    
80     -480   
-64    144    
-160   -112   
288    32     
-48    32     
-48    0      
128    112    
-48    176    
-64    176    
-112   -128   
-48    -96    
0      32     
112    176    
-96    -64    
-48    32     
16     -368   
64     112    
16     64     
16     48     
-80    -128   
-16    -96    
128    64     
0      16     
48     128    
-16    32     
-128   0      
240    32     
32     176    
-32    -160   
160    160    
-32    -240   
-48    48     
-48    -48    
608    736    
-400   640    
-112   208    
80     960    
96     496    
-384   -432   
176    -32    
-96    -224   
224    0      
112    112    
-64    48     
0      80     
-128   -160   
80     48     
16     -496   
80     -16    
-160   32     
0      160    
176    64     
-80    112    
320    256    
-256   272    
208    288    
-304   32     
176    208    
-96    -336   
-80    32     
32     -288   
-64    -144   
288    -176   
-48    -144   
96     -320   
-32    -64    
256    432    
304    288    
-272   144    
272    0      
-48    -208   
-304   -880   
32     256    
32     432    
-128   240    
80     0      
-16    -32    
-16    -144   
-80    -208   
144    16     
160    208    
-272   -16    
176    80     
-144   176    
160    -592   
128    80     
80     -48    
144    -48    
0      224    
96     128    
80     -160   
128    64     
48     -128   
-16    64     
96     -32    
-16    -592   
0      16     
176    -1056  
272    256    
-176   208    
144    272    
48     -32    
-224   -1488  
112    -560   
240    144    
-32    160    
32     288    
80     -64    
96     128    
-64    -64    
144    -576   
-32    -16    
256    -368   
-48    144    
-704   0      
128    -304   
0      -32    
128    -144   
-32    32     
144    64     
32     -32    
144    288    
-16    208    
80     -80    
112    -160   
128    -16    
-128   48     
112    -16    
0      0      
-288   -48    
112    -224   
80     -112   
-48    -496   
80     -16    
64     -144   
96     48     
16     -1872  
176    0      
-96    -576   
-160   -288   
224    -272   
224    288    
-64    384    
32     64     
-416   -96    
-112   -320   
-64    -176   
272    208    
-128   240    
64     144    
-128   -224   
176    -384   
128    304    
-80    64     
80     80     
48     -128   
-16    64     
-32    -64    
16     -48    
80     16     
128    32     
-112   144    
192    608    
-32    224    
-32    -304   
0      -176   
112    -656   
32     64     
160    -224   
112    464    
912    1136   
-240   1312   
16     576    
-80    256    
0      -336   
112    -224   
-592   -208   
48     -64    
-1152  -48    
128    -176   
-48    -96    
-80    -64    
-80    -256   
-48    -2544  
128    384    
-64    144    
128    48     
-16    32     
-160   -512   
352    -112   
128    832    
0      144    
128    -496   
-448   320    
0      80     
224    -208   
-64    -384   
144    144    
-144   -400   
112    0      
64     -528   
-16    208    
336    800    
-16    -416   
-496   -272   
208    -112   
-240   240    
32     256    
32     -32    
32     -16    
-128   -16    
-160   -272   
240    -400   
48     -192   
32     -32    
-96    64     
-128   -144   
-16    -128   
48     -144   
16     -160   
64     -144   
48     -192   
0      32     
-112   32     
-80    -336   
-224   -320   
192    -240   
48     176    
-112   -48    
-352   -16    
-80    -560   
-224   -416   
-48    -96    
-368   -32    
-96    -96    
-32    -208   
-32    160    
-96    -48    
-544   -80    
192    -144   
-64    208    
-320   32     
-224   32     
-464   -240   
-784   -128   
-128   48     
-416   -16    
128    80     
-960   16     
-16    0      
144    16     
-320   80     
16     16     
-32    32     
112    -48    
208    96     
-224   -112   
-160   -464   
48     144    
-288   -112   
-208   -80    
208    400    
-96    0      
-608   -128   
-80    -224   
-912   -48    
-32    -48    
144    32     
64     80     
0      -64    
32     32     
-224   -272   
0      64     
176    112    
-32    64     
352    272    
-304   224    
-176   176    
-48    32     
144    -80    
80     128    
224    144    
16     16     
-192   32     
-64    -160   
16     16     
112    -80    
-80    0      
64     32     
96     144    
-112   64     
-112   -16    
-16    64     
-32    48     
48     48     
32     -64    
32     16     
-1408  48     
0      80     
-16    -32    
-32    80     
-48    160    
80     32     
-64    32     
-176   -64    
48     96     
-304   -48    
0      160    
-80    96     
32     320    
-32    -80    
-304   -48    
-704   -96    
48     64     
-48    -32    
192    64     
-192   64     
144    128    
-144   -96    
80     48     
80     240    
32     16     
-48    -16    
-64    -48    
16     48     
-48    -32    
-16    32     
-144   32     
-48    16     
288    160    
-96    80     
-96    -32    
64     0      
112    128    
-96    128    
112    48     
-224   48     
-64    -112   
0      -144   
32     144    
80     112    
0      112    
-160   0      
192    64     
-816   -16    
-64    -16    
0      112    
32     32     
-16    -16    
112    32     
-128   16     
-32    96     
-96    32     
0      64     
-64    -32    
-48    -32    
208    96     
-336   0      
32     112    
96     80     
-16    48     
32     96     
0      48     
-64    48     
64     112    
-96    80     
0      112    
32     32     
192    160    
-160   128    
-80    80     
48     16     
80     -112   
-64    -48    
160    80     
-32    -32    
-16    144    
-64    16     
-16    112    
-48    16     
0      64     
64     96     
64     48     
128    112    
-144   224    
-208   16     
-64    128    
288    80     
192    320    
-256   128    
144    96     
-128   64     
96     128    
-64    208    
-192   -112   
160    -304   
-272   -304   
144    144    
-176   48     
-256   -16    
-64    80     
-48    544    
144    288    
-80    96     
-32    192    
-224   -32    
288    96     
-80    16     
288    -160   
48     112    
176    208    
0      112    
16     80     
-224   -32    
64     288    
112    96     
-144   32     
-128   96     
-80    -512   
-128   -352   
80     -80    
-48    64     
32     0      
-32    16     
48     48     
0      208    
-80    64     
304    400    
-112   320    
144    160    
-176   368    
64     32     
208    336    
-224   -64    
-48    -304   
-64    -64    
144    336    
288    368    
-112   -112   
80     96     
16     192    
80     224    
-96    32     
-96    112    
112    544    
-112   -160   
-160   -512   
-112   -208   
96     -80    
-128   240    
160    80     
208    64     
-96    432    
-16    128    
160    -64    
112    448    
-240   -112   
208    -64    
-64    208    
0      336    
80     -192   
-112   144    
64     128    
-144   544    
48     -352   
-32    -256   
96     160    
-48    320    
256    192    
-64    -48    
192    32     
64     16     
144    112    
-128   -352   
128    -16    
464    400    
-224   352    
-176   176    
128    -1120  
-192   -160   
-16    -496   
-32    256    
128    80     
48     32     
64     176    
208    144    
-224   -272   
-48    80     
96     32     
0      112    
96     32     
0      -240   
-144   -96    
432    -592   
-112   480    
432    96     
-80    320    
160    832    
-16    0      
-64    -544   
128    -144   
48     -32    
96     144    
32     80     
-128   48     
368    176    
-176   112    
-16    -48    
160    -176   
16     144    
0      -624   
-96    32     
48     144    
0      32     
128    128    
-160   -272   
-32    -400   
0      -320   
32     -192   
64     0      
48     240    
16     64     
0      112    
48     -384   
128    128    
-48    -1152  
48     96     
96     -576   
32     48     
0      80     
48     80     
-80    -16    
176    352    
64     672    
80     112    
176    1088   
-112   96     
-176   -368   
0      -496   
-32    -16    
16     -240   
64     272    
112    -400   
-112   -320   
48     -96    
192    176    
-176   80     
112    -528   
-16    784    
80     -272   
-128   -416   
400    144    
-80    304    
96     96     
-48    256    
128    128    
-64    160    
80     0      
32     176    
-64    -80    
-32    -160   
144    432    
48     -240   
32     528    
272    -48    
-416   -608   
64     -160   
240    144    
-48    288    
48     -96    
96     -272   
80     96     
-16    -240   
64     -160   
160    48     
64     -1008  
-208   -160   
176    -880   
-48    64     
112    -128   
-64    -16    
16     -96    
176    112    
384    272    
-112   256    
-144   -176   
336    -624   
-64    224    
176    -320   
0      -48    
-16    16     
112    -464   
-528   -128   
224    -320   
368    336    
-352   -96    
-48    16     
-64    -1984  
112    0      
16     128    
64     -32    
48     -16    
-64    -96    
80     32     
-160   -64    
-208   -128   
144    -176   
-608   -16    
192    144    
48     16     
-16    -192   
240    64     
64     96     
-32    -96    
128    -16    
288    288    
-368   -128   
-112   32     
16     -64    
0      -64    
-48    96     
32     -16    
-16    32     
-272   -48    
352    -32    
336    624    
-560   336    
32     32     
-144   224    
288    0      
-32    432    
160    128    
64     32     
160    -176   
224    144    
-112   -160   
48     -256   
0      -64    
80     -160   
-624   256    
0      112    
64     32     
64     224    
336    -208   
-192   -592   
144    48     
-80    -112   
176    96     
-192   16     
16     -80    
-192   -176   
144    16     
-128   176    
-48    128    
160    112    
16     -16    
304    -64    
64     -320   
176    -80    
-16    -272   
-208   -160   
128    -2288  
16     240    
224    304    
176    176    
-192   -32    
192    176    
-64    128    
-48    208    
-272   16     
304    96     
-864   16     
-16    128    
112    160    
-144   -160   
-16    0      
160    -240   
-160   32     
-80    -16    
16     -48    
64     16     
80     32     
-64    112    
0      -176   
-544   -16    
144    -96    
-112   96     
80     -16    
80     32     
16     -320   
32     16     
0      -768   
-16    240    
-112   112    
16     16     
0      64     
-80    -128   
-288   0      
256    -64    
-320   -48    
144    -112   
-208   16     
160    -96    
208    320    
-240   -272   
176    96     
-128   -160   
112    0      
96     48     
96     48     
-48    32     
-32    64     
-144   32     
192    48     
-80    -64    
32     32     
-80    48     
96     -144   
-16    96     
256    -80    
48     48     
-176   -32    
-416   0      
400    368    
-960   256    
-32    48     
32     32     
64     80     
16     112    
-208   -112   
240    -128   
-96    144    
-1056  -192   
-64    80     
160    0      
-16    144    
-96    64     
-176   -16    
-160   0      
80     64     
-96    112    
-320   -16    
96     64     
-128   -208   
-224   96     
144    -192   
-96    64     
-112   -32    
64     112    
-48    -112   
-32    64     
-16    80     
-16    96     
16     80     
48     64     
-32    0      
-48    112    
-16    64     
-16    48     
-32    48     
-80    -80    
32     32     
0      -80    
0      80     
-224   -208   
64     -240   
160    -64    
-144   32     
32     -176   
-112   -176   
144    -48    
-352   0      
128    160    
-240   304    
16     160    
-16    32     
96     32     
-32    -208   
272    272    
-176   224    
-80    32     
-160   0      
336    112    
-144   32     
-400   -704   
64     -272   
-80    224    
176    128    
-176   144    
-112   32     
-640   -144   
336    224    
-144   272    
-96    -64    
288    656    
-64    -32    
64     -144   
-128   304    
128    384    
-80    -128   
128    -176   
96     240    
-224   80     
-336   -624   
48     32     
-240   144    
32     64     
-48    64     
288    496    
-80    -240   
-160   32     
208    16     
-48    -48    
0      -352   
-48    112    
16     192    
-192   64     
208    208    
-304   -112   
208    0      
-528   -192   
176    144    
-1008  96     
-160   128    
-80    128    
-48    16     
128    240    
-208   -48    
176    -256   
-240   288    
32     -48    
304    384    
-368   80     
-368   -464   
112    -64    
-192   32     
240    144    
-704   -304   
352    -560   
144    32     
464    256    
-144   96     
480    384    
240    1200   
-144   240    
16     -128   
112    -96    
48     128    
-496   48     
320    -128   
-752   -304   
32     -512   
256    192    
-80    464    
48     -96    
128    -144   
112    80     
-80    80     
112    -112   
80     -352   
-176   320    
64     -432   
160    -256   
-208   48     
512    16     
-608   320    
128    -288   
48     48     
-256   64     
96     -560   
-112   96     
304    -144   
256    912    
128    368    
256    -384   
240    416    
-240   -16    
112    80     
16     0      
80     64     
-96    0      
-16    64     
160    112    
-32    32     
0      32     
48     48     
32     -96    
0      64     
288    544    
-304   256    
64     224    
-80    48     
160    464    
-32    -48    
80     32     
144    32     
-32    -224   
48     320    
48     32     
144    144    
288    144    
-160   576    
-16    96     
160    -80    
-160   288    
64     -224   
64     32     
-352   -416   
448    144    
-176   816    
320    272    
-64    -384   
-176   -128   
288    -304   
-160   416    
-80    64     
112    320    
16     208    
-128   -32    
80     112    
16     16     
-48    48     
96     96     
-96    -48    
0      -1120  
16     48     
-96    -48    
128    96     
0      352    
240    0      
-144   -416   
320    688    
112    512    
-16    64     
144    64     
96     32     
-48    256    
48     -496   
-16    -144   
144    -176   
-80    64     
208    128    
-144   -400   
-128   -416   
192    -128   
-144   -80    
144    64     
96     288    
64     224    
32     16     
-80    -64    
48     -272   
80     160    
-80    -64    
112    -128   
272    144    
-32    -432   
48     64     
192    80     
-64    -48    
208    -32    
-304   288    
96     32     
-240   96     
32     -304   
240    224    
-224   0      
112    176    
-32    208    
160    -144   
128    96     
-80    -1504  
-32    176    
48     80     
-16    -112   
112    0      
-128   80     
-32    -96    
0      96     
-64    -48    
128    32     
80     368    
16     208    
-160   176    
-16    -64    
32     112    
32     144    
464    384    
-464   176    
48     16     
-224   320    
304    -48    
0      -160   
96     80     
128    160    
-64    208    
-80    96     
48     -64    
-144   -32    
256    -208   
0      160    
80     -96    
-16    80     
144    -1552  
160    48     
-48    -384   
192    80     
112    48     
48     176    
-16    64     
112    96     
-112   144    
112    -96    
0      48     
144    -96    
160    128    
64     -512   
-16    80     
80     -96    
64     112    
-64    -512   
-224   -400   
320    -144   
-144   176    
336    192    
96     272    
112    608    
-112   -32    
-32    -240   
160    -96    
320    224    
80     -432   
-112   80     
0      -64    
48     128    
96     64     
80     192    
48     -80    
-176   -144   
208    -16    
-208   -208   
64     240    
-144   224    
-208   16     
304    -320   
64     32     
64     -192   
48     208    
112    -32    
-144   -80    
288    -1616  
432    128    
-16    80     
16     192    
96     32     
112    -16    
-48    -464   
-16    -96    
240    32     
96     -16    
-208   -192   
240    48     
-96    240    
-80    -160   
-64    80     
32     32     
64     -1424  
80     224    
128    -144   
-112   -144   
-48    -160   
128    -336   
48     16     
-16    -256   
128    -32    
-144   -144   
-96    -64    
112    32     
-80    -176   
48     -256   
160    48     
64     -96    
16     64     
0      -160   
-16    -512   
-496   -304   
96     -224   
64     32     
144    112    
-208   -16    
-96    -224   
320    -64    
-96    64     
128    16     
64     -16    
16     192    
32     -128   
-64    80     
-80    0      
16     96     
-32    0      
-144   64     
160    48     
-128   -112   
96     -176   
64     -96    
128    48     
144    -32    
-208   -32    
336    16     
-48    80     
176    0      
-144   192    
0      48     
112    80     
-208   128    
144    -48    
-800   -80    
32     -176   
256    48     
-80    -176   
224    -16    
-96    -48    
64     -144   
-144   -80    
224    336    
256    320    
-320   -64    
-64    32     
272    -112   
-432   -32    
272    -96    
-352   192    
32     96     
-80    -208   
288    96     
-192   -16    
64     -512   
-16    400    
64     -624   
-112   80     
48     32     
48     -80    
-80    64     
176    224    
-336   -416   
80     -320   
-224   96     
112    -128   
368    448    
80     32     
0      -320   
80     -208   
16     -32    
48     -304   
208    -256   
-16    16     
128    192    
-32    112    
-80    -112   
64     384    
32     192    
-144   400    
-80    -320   
-224   -48    
112    -16    
256    208    
-96    96     
-96    -224   
304    16     
-64    112    
-256   -64    
112    16     
-320   -16    
0      80     
32     112    
-128   96     
-272   -304   
224    16     
-160   416    
-112   -32    
64     -144   
-48    -160   
32     432    
32     -704   
112    0      
112    336    
-176   336    
-240   -336   
144    -128   
-64    368    
-16    288    
-384   -48    
256    112    
-112   -144   
176    -384   
32     -144   
288    128    
144    496    
-240   -96    
-128   -240   
-208   160    
-1168  -176   
176    -352   
128    -128   
-48    -256   
80     -16    
608    544    
176    848    
-128   176    
-32    -224   
48     160    
-400   -224   
208    -80    
336    192    
32     384    
-112   -16    
-304   32     
240    48     
-672   144    
112    -352   
256    -64    
32     112    
224    160    
-304   64     
-16    -496   
352    -32    
64     1024   
-80    784    
64     16     
160    -16    
-96    96     
-224   -48    
-112   -128   
0      -32    
-96    64     
-1392  160    
-512   -448   
288    -976   
0      480    
-48    864    
-128   -80    
-32    -80    
-208   -176   
96     -160   
128    496    
-288   -608   
-80    -384   
112    448    
224    -160   
-48    32     
-240   32     
352    272    
-384   176    
-64    -192   
-16    -288   
96     352    
-304   240    
0      -128   
-48    -80    
16     112    
-224   -320   
288    48     
-160   48     
-208   32     
-208   -160   
-64    -32    
144    272    
-896   -96    
128    96     
-400   -448   
80     -528   
-128   64     
304    -112   
-240   224    
32     -48    
-96    -16    
-96    48     
0      -512   
128    -64    
-96    16     
-96    -256   
240    -256   
-480   32     
192    352    
-128   -496   
160    432    
-128   -96    
80     16     
64     496    
-144   -272   
-16    -224   
-16    -64    
-128   240    
160    272    
64     80     
-288   -784   
0      -160   
-144   224    
64     304    
-80    -32    
-32    -304   
192    48     
0      448    
-80    32     
-32    -288   
112    192    
192    368    
-16    176    
0      -80    
-16    192    
80     64     
-16    32     
-32    32     
192    16     
-384   -32    
144    -112   
-64    0      
80     -16    
-32    96     
144    160    
-256   32     
192    112    
-64    -16    
-112   -96    
128    -64    
48     128    
160    112    
-288   112    
192    80     
-80    112    
-16    16     
16     48     
32     48     
16     0      
240    -16    
-112   48     
-48    0      
0      160    
-16    160    
0      128    
16     80     
112    0      
-192   -48    
48     80     
48     -16    
64     0      
-48    80     
144    144    
-64    -32    
-48    16     
16     48     
-16    176    
-80    48     
-48    96     
208    48     
-400   32     
160    80     
-240   -16    
96     64     
96     48     
-48    64     
128    160    
-208   128    
224    32     
-96    144    
144    96     
64     112    
64     112    
-16    48     
32     128    
32     48     
32     160    
0      -32    
96     -272   
80     -16    
-192   176    
-32    192    
272    0      
-48    144    
192    48     
-64    16     
320    -64    
64     320    
-240   -112   
0      192    
160    -16    
16     128    
64     240    
160    128    
-112   -160   
-64    -160   
112    -336   
-16    80     
96     96     
-48    96     
112    176    
16     -80    
-128   -80    
240    -240   
144    64     
64     -64    
64     192    
176    112    
32     96     
-288   48     
112    128    
-32    64     
-64    32     
160    128    
-144   -32    
-48    -32    
-96    -16    
192    128    
-96    64     
-240   -224   
400    -16    
-48    128    
-64    176    
-48    208    
-80    208    
128    320    
64     320    
-80    16     
0      80     
-32    144    
-32    -48    
96     80     
160    80     
64     -144   
176    112    
32     192    
-256   -272   
272    240    
0      -736   
-48    16     
0      -16    
128    96     
-176   -112   
320    112    
-128   32     
352    208    
-144   96     
224    160    
16     -64    
-352   160    
192    96     
-16    -48    
192    80     
-48    -2480  
-160   16     
160    -96    
-64    16     
48     64     
128    224    
-240   128    
112    160    
-96    0      
112    112    
-64    80     
16     256    
112    16     
-96    -64    
208    112    
-160   -624   
-32    48     
16     -48    
0      48     
144    32     
48     32     
80     -448   
96     144    
48     -240   
0      -48    
96     32     
-64    -48    
192    128    
-16    -224   
32     64     
64     -192   
192    176    
144    -304   
48     240    
-176   -16    
48     96     
16     -80    
32     240    
-64    64     
-16    112    
-48    32     
208    64     
96     -80    
32     -112   
0      224    
80     -96    
112    288    
-112   -496   
-48    -480   
-16    -976   
96     224    
-96    -96    
0      -160   
-96    -304   
48     0      
224    16     
-128   -112   
112    160    
48     -176   
128    32     
128    16     
32     64     
32     -656   
-16    128    
96     -64    
80     80     
16     16     
96     80     
0      64     
-96    -128   
112    -192   
80     144    
176    -48    
256    -448   
-48    416    
208    -192   
-176   -480   
384    224    
-192   0      
240    -352   
-144   -32    
176    -32    
-192   -80    
64     192    
0      -304   
112    288    
48     0      
64     -32    
16     -80    
96     288    
-16    -208   
128    80     
64     -16    
304    224    
32     -96    
-80    -80    
192    32     
32     -112   
32     48     
96     -96    
48     -416   
112    -32    
-160   -2496  
304    112    
-48    496    
208    208    
80     0      
-16    -208   
96     48     
0      64     
128    48     
-160   48     
144    -16    
0      -208   
-1392  -176   
0      -656   
32     -128   
32     -144   
48     -32    
32     -688   
64     -16    
48     32     
-80    -272   
80     -272   
-64    240    
144    -128   
-64    160    
-128   208    
-48    -80    
-576   16     
16     -80    
0      128    
256    -16    
32     448    
0      0      
-304   -288   
32     -144   
-96    80     
-32    -48    
-352   -192   
-432   -704   
384    -368   
-624   -272   
288    480    
-192   128    
144    -128   
112    128    
-256   -16    
288    160    
16     112    
-128   432    
-96    48     
32     -112   
240    416    
-208   64     
144    -304   
96     -224   
176    -192   
96     0      
-288   240    
320    -384   
-96    416    
-272   16     
32     32     
320    -96    
-64    192    
128    -400   
144    -144   
304    112    
-160   0      
288    -592   
288    544    
176    368    
16     576    
-448   -240   
320    -288   
-560   16     
96     -16    
-928   -96    
-64    96     
48     80     
48     -256   
-176   -320   
400    -48    
-176   240    
384    80     
-48    64     
160    256    
-80    -192   
-288   -400   
-192   -1104  
704    512    
-704   -304   
-16    -528   
304    -608   
352    240    
128    0      
-32    96     
192    -128   
80     352    
64     624    
112    -16    
-576   -544   
352    -512   
80     192    
208    224    
-192   416    
-48    -48    
-224   176    
176    -96    
0      32     
-48    -48    
-144   352    
192    -384   
0      -64    
-416   48     
80     128    
-240   48     
48     16     
-160   112    
-16    64     
-144   224    
32     128    
64     288    
-144   144    
-112   208    
240    -224   
48     192    
-144   -144   
0      0      
224    400    
-304   112    
-32    32     
32     -128   
-128   0      
128    -160   
176    0      
128    0      
64     32     
-160   64     
-16    0      
-352   528    
-336   320    
-96    32     
-384   0      
112    64     
-688   -48    
-64    64     
-464   -48    
-176   -176   
-128   -128   
80     80     
-240   -192   
32     -160   
-512   -160   
224    -208   
-592   -544   
128    -80    
-112   -16    
144    80     
32     0      
-224   32     
48     208    
-336   32     
32     0      
-432   144    
368    -160   
-592   -160   
512    320    
-624   240    
176    112    
-16    -128   
-224   16     
-32    144    
-160   16     
-16    64     
-288   -16    
-16    -32    
-128   48     
-64    -16    
-384   -16    
-80    -80    
-192   -80    
160    96     
-32    32     
48     128    
-112   -16    
16     64     
-144   64     
-64    32     
128    96     
0      64     
-160   48     
0      -16    
64     64     
32     32     
-128   0      
-528   32     
-96    48     
-48    -112   
160    48     
-192   208    
128    112    
-96    144    
160    48     
160    -32    
-96    16     
512    192    
-144   80     
-192   -16    
224    -128   
64     16     
-160   48     
48     144    
-176   -32    
0      96     
-32    224    
48     176    
64     144    
32     160    
80     240    
48     -144   
48     32     
-64    0      
-80    16     
-64    16     
80     112    
-368   -272   
112    64     
304    192    
-464   64     
0      -144   
-16    0      
16     96     
-256   0      
-144   32     
-16    80     
-144   32     
0      224    
32     -32    
-144   -48    
-128   176    
-464   -224   
-112   96     
-560   -48    
-80    80     
-208   -192   
240    -32    
0      192    
128    256    
-272   0      
-80    -224   
64     144    
-32    -48    
-208   0      
64     -32    
-144   -64    
-128   -112   
128    96     
32     64     
272    480    
-384   448    
-16    48     
0      176    
48     0      
272    336    
-512   128    
32     -144   
16     -16    
416    400    
-448   96     
32     -32    
64     80     
16     16     
48     64     
-16    16     
0      96     
-96    48     
304    64     
-112   96     
-208   -32    
160    0      
-160   64     
-144   0      
144    112    
-144   96     
128    144    
-448   -16    
288    80     
-176   -16    
272    16     
96     176    
16     80     
48     128    
48     64     
256    240    
-240   192    
-48    32     
32     16     
112    16     
-336   -208   
16     16     
96     160    
-176   224    
0      32     
336    288    
-208   176    
80     144    
32     48     
64     64     
112    16     
96     -112   
528    432    
-368   144    
224    256    
-432   -48    
272    -192   
192    -112   
128    16     
208    48     
176    128    
96     128    
80     224    
-32    144    
32     0      
208    48     
-96    224    
48     224    
-48    16     
16     -160   
48     304    
80     16     
-272   -176   
208    128    
-160   240    
256    96     
-176   576    
-48    -304   
144    640    
-16    224    
128    -176   
-160   272    
-16    -112   
-48    -80    
288    704    
-160   48     
160    -48    
-32    -480   
-16    -224   
32     160    
-48    368    
112    112    
-208   -288   
64     80     
128    48     
-256   64     
0      16     
96     144    
160    64     
-112   80     
32     -80    
-32    -160   
16     80     
-16    144    
144    -16    
-64    -176   
128    48     
-80    240    
144    -192   
-144   -80    
128    -96    
-128   96     
64     272    
-64    -16    
-16    128    
-112   -128   
64     -304   
32     208    
416    -592   
-160   128    
208    208    
-16    96     
0      96     
48     32     
64     80     
32     96     
-32    -128   
208    128    
304    400    
-48    656    
-16    48     
160    -64    
16     80     
80     -656   
48     112    
-64    -160   
64     128    
112    880    
16     480    
0      432    
-64    80     
64     -176   
-16    64     
96     176    
0      -160   
48     128    
96     -112   
32     16     
0      -256   
80     160    
0      -800   
176    64     
-96    -192   
128    112    
-96    -80    
256    192    
80     176    
-16    384    
-192   128    
144    -64    
16     -112   
-176   -528   
48     48     
-208   -288   
32     -240   
0      -240   
176    0      
-416   -1888  
368    96     
-160   256    
176    112    
96     224    
-112   -48    
-16    -240   
0      48     
96     -64    
-48    -384   
160    96     
-240   -160   
112    -240   
64     176    
80     96     
80     -400   
-192   112    
400    112    
-320   -32    
432    560    
-128   800    
96     -160   
-96    -464   
144    160    
-16    -192   
16     -272   
208    -624   
-16    96     
208    -320   
96     240    
176    288    
-192   480    
0      -32    
0      48     
0      -32    
-32    -224   
112    -112   
-144   -256   
160    80     
-144   -192   
32     -224   
-32    -352   
112    176    
224    32     
96     160    
0      -352   
192    992    
-64    464    
-144   -1264  
176    -32    
-144   -32    
224    -336   
192    0      
32     -416   
0      -336   
144    -288   
128    -96    
192    -192   
112    -32    
304    416    
-32    288    
-80    -304   
0      96     
160    -256   
112    -240   
176    0      
176    -656   
-144   -160   
-32    -1136  
32     -384   
-64    -1888  
32     -288   
192    144    
-272   0      
-64    -656   
64     -80    
96     -80    
16     144    
-80    -160   
-176   -144   
-480   -160   
-128   -80    
80     -112   
-48    -192   
176    -48    
32     -48    
-16    -192   
32     -1040  
96     -176   
-112   -96    
16     64     
64     -48    
-32    96     
0      0      
16     -144   
-256   0      
-32    16     
-96    80     
112    -112   
-112   -48    
64     -96    
64     -96    
128    -1344  
208    48     
-80    0      
-48    16     
160    -112   
-80    16     
-160   -16    
-160   -464   
-368   -96    
144    80     
-1408  -80    
64     -48    
32     -48    
32     -256   
-176   0      
16     48     
192    64     
-160   32     
32     144    
240    -80    
-64    -160   
0      -96    
96     16     
-112   -16    
96     -16    
-208   -112   
208    0      
-256   -240   
96     32     
144    80     
-224   -144   
112    144    
-144   -1184  
304    240    
-240   0      
176    32     
-176   -32    
128    -16    
48     -32    
-64    -48    
-208   48     
-48    -80    
-384   -304   
256    32     
-144   -64    
-128   -384   
128    64     
80     -256   
-64    240    
96     16     
-48    -48    
0      0      
16     -48    
64     -64    
96     32     
16     64     
-96    48     
-16    16     
-32    -208   
-48    0      
-32    -288   
0      128    
160    -192   
-112   112    
-496   -48    
400    144    
-528   -112   
-160   -32    
160    -112   
0      80     
-32    96     
16     -16    
-480   -64    
-128   -256   
256    16     
0      64     
-144   256    
336    -64    
0      -112   
-112   -48    
32     -112   
-64    -80    
48     -128   
-32    16     
-80    -128   
-64    80     
-48    -16    
-240   80     
256    -80    
0      48     
0      -112   
-80    144    
0      320    
-896   64     
-192   16     
-368   16     
80     -16    
-352   -48    
-224   -16    
224    -32    
-144   0      
160    32     
-80    -80    
-416   -208   
336    -80    
-16    -160   
-96    32     
64     128    
-32    96     
-48    96     
-128   0      
-112   0      
-192   -32    
-16    144    
-32    -64    
96     160    
224    352    
16     32     
-96    0      
-32    0      
-64    -128   
48     160    
96     144    
-96    64     
-64    -32    
-368   -128   
368    -144   
-112   -64    
0      48     
-288   32     
-16    96     
-416   272    
16     128    
-208   -160   
240    240    
-128   -80    
176    16     
-160   16     
48     32     
-96    16     
-32    32     
-128   -16    
256    112    
-144   128    
-672   -160   
-64    0      
-256   -192   
-48    -16    
-256   -416   
320    -416   
80     -64    
240    192    
-192   32     
144    128    
-80    96     
16     32     
128    -64    
16     16     
-96    -32    
-48    -144   
48     -32    
-336   32     
-112   128    
16     48     
-32    80     
-256   -80    
128    -208   
144    -48    
32     64     
48     16     
48     64     
0      272    
-48    96     
-64    32     
-160   -80    
-32    32     
-160   48     
-304   -528   
-96    -608   
-96    -272   
-224   -32    
16     240    
-128   144    
-144   32     
-256   384    
-32    -64    
-240   -16    
-96    0      
144    112    
-176   80     
112    368    
-160   352    
-128   0      
-496   -464   
544    -64    
-240   -256   
176    416    
80     0      
112    400    
32     256    
-176   -592   
-80    16     
96     160    
96     -16    
-240   -48    
-64    352    
-112   -64    
-48    -32    
64     144    
0      -16    
-128   -64    
176    32     
-64    160    
0      -192   
-32    192    
224    128    
-144   224    
-48    32     
-224   -128   
32     64     
128    128    
-240   -16    
112    96     
32     64     
128    32     
-160   48     
16     16     
0      32     
-48    64     
32     64     
-288   0      
336    -16    
-320   16     
80     288    
-176   -128   
-112   112    
32     384    
96     240    
-96    160    
48     48     
96     64     
-96    -144   
-32    80     
48     96     
-64    -288   
-192   -144   
176    -16    
-240   64     
64     96     
-160   32     
80     144    
-112   16     
-112   0      
160    80     
32     64     
64     128    
80     32     
192    16     
-48    32     
0      16     
160    224    
-16    112    
-64    -272   
128    624    
-32    400    
48     96     
48     176    
-32    160    
96     48     
64     48     
32     96     
224    96     
-192   304    
16     -48    
32     384    
-48    192    
208    80     
-48    16     
112    64     
-192   0      
112    80     
144    128    
16     -336   
16     -288   
48     336    
160    288    
-48    -128   
176    288    
-96    192    
80     -192   
0      128    
96     48     
-464   -992   
240    848    
-80    -240   
128    864    
-160   -32    
240    288    
-64    160    
-112   96     
96     400    
0      -288   
80     -48    
144    320    
-80    -48    
-16    80     
80     -64    
0      -32    
144    -80    
-96    -208   
64     -96    
112    160    
-160   -240   
192    -272   
-48    -160   
112    32     
48     112    
-16    64     
144    -32    
160    -48    
-128   -48    
80     144    
-80    -32    
400    432    
-208   480    
48     -48    
32     -16    
16     -2432  
-80    -32    
64     -64    
240    64     
-48    -32    
-224   144    
0      16     
-32    48     
112    -16    
0      144    
-16    -96    
160    0      
192    160    
-16    -256   
16     -16    
640    96     
-880   176    
176    -144   
32     192    
-80    32     
320    160    
-400   64     
496    224    
-608   32     
320    80     
-208   0      
80     -240   
96     96     
112    -64    
-32    144    
64     -320   
208    112    
-112   -1808  
112    112    
-128   -224   
160    128    
128    112    
-160   208    
-16    -16    
0      96     
208    0      
32     -32    
112    -16    
96     -64    
208    176    
400    -96    
-384   96     
160    -48    
-32    144    
80     -128   
-192   96     
96     224    
32     224    
0      80     
-144   80     
80     48     
48     80     
96     96     
96     32     
-96    32     
96     -432   
224    112    
32     -352   
80     112    
96     -272   
64     -16    
128    0      
288    192    
-96    96     
112    112    
224    112    
96     -384   
-64    0      
176    -240   
96     32     
-48    112    
288    16     
-96    -320   
64     112    
112    -208   
112    144    
-112   0      
48     96     
160    80     
16     -192   
192    48     
16     144    
96     16     
-64    -112   
80     192    
64     -160   
-48    64     
112    -160   
16     112    
464    -464   
-432   160    
224    16     
-208   -1184  
128    144    
64     -160   
-80    128    
16     160    
208    -144   
128    176    
-32    96     
-176   -240   
224    0      
48     64     
-48    144    
64     96     
80     -16    
-160   -32    
48     48     
96     -544   
-656   -432   
288    -256   
80     -32    
-80    -736   
192    -144   
-80    -1248  
80     -16    
-48    -64    
32     -16    
112    -304   
48     0      
-16    -624   
-16    64     
128    -144   
64     96     
-320   0      
-32    -128   
0      -16    
192    0      
-64    -48    
-32    -208   
192    -48    
96     112    
32     -112   
144    -416   
-256   -112   
208    -192   
128    96     
-80    -16    
-112   -448   
-176   -16    
272    48     
-432   -48    
224    16     
48     32     
-320   -256   
432    0      
144    -1008  
-304   -32    
96     128    
-80    192    
208    64     
0      144    
-48    32     
-288   -224   
-304   -128   
-32    -128   
-864   -48    
112    -288   
-48    -16    
16     -272   
-112   -48    
160    -624   
-96    64     
32     32     
-80    272    
96     -48    
48     16     
-112   -160   
48     -64    
64     64     
-192   -112   
-288   -112   
32     -112   
160    -96    
32     -96    
-144   80     
80     48     
-192   48     
112    -256   
288    432    
-240   64     
-320   -1120  
-64    -544   
432    176    
-192   -96    
240    112    
-352   64     
96     -96    
-688   592    
144    464    
144    112    
-48    -192   
144    96     
-128   -1520  
-128   -32    
128    -96    
64     96     
-64    32     
-16    0      
144    -16    
32     -128   
-256   32     
80     -64    
-128   80     
-16    96     
192    48     
176    -368   
224    80     
80     -736   
16     720    
96     448    
-192   192    
368    320    
-48    64     
-192   -208   
0      288    
448    480    
-288   -16    
-80    -160   
32     16     
-144   160    
48     -240   
96     -16    
64     0      
-128   96     
-64    320    
-96    -224   
-112   176    
-144   -176   
176    -384   
64     352    
-16    0      
64     -112   
0      -368   
256    -320   
32     -192   
256    -416   
-112   240    
-16    -528   
-240   256    
-96    96     
400    32     
0      384    
-64    32     
-32    -64    
80     -48    
-112   -32    
80     -96    
-160   0      
-1008  -128   
-16    80     
64     -48    
96     208    
-80    240    
-256   -48    
-96    0      
128    368    
-160   -64    
-240   -448   
-208   16     
-96    -128   
-16    -240   
-80    160    
208    288    
-256   144    
368    352    
-240   384    
128    240    
-112   48     
32     176    
-80    32     
-48    112    
-144   -96    
-464   160    
80     -16    
-896   -80    
32     480    
-176   -400   
32     -16    
96     -16    
144    288    
-320   -304   
-112   -16    
272    208    
-192   0      
0      -16    
-192   -64    
176    80     
-176   48     
-48    -16    
-128   16     
0      64     
-288   -208   
-16    0      
0      -320   
-128   0      
-32    336    
16     16     
-48    -128   
0      96     
-96    -112   
0      256    
-16    112    
-32    304    
112    640    
-96    -144   
176    240    
-1120  -160   
160    -224   
16     -16    
-96    16     
208    -80    
96     352    
-64    496    
-96    16     
160    384    
-48    -128   
-48    96     
112    96     
-96    -48    
-32    16     
-208   96     
672    240    
-496   -112   
224    -208   
-160   -208   
128    464    
-80    48     
-368   -1040  
224    -256   
-160   512    
160    64     
-128   160    
-192   -192   
-32    -16    
-176   -128   
-112   304    
16     48     
-96    304    
-1696  -416   
112    128    
-48    -64    
96     32     
32     160    
-32    112    
-144   -160   
240    96     
-288   -240   
-32    -32    
32     128    
-144   -224   
-64    0      
-48    -128   
-224   -128   
-992   -768   
-400   -320   
112    -336   
32     -304   
0      48     
64     -16    
96     80     
32     64     
160    160    
-176   64     
208    80     
-304   -224   
480    128    
-384   128    
16     112    
48     -16    
224    96     
64     48     
-192   80     
0      112    
-208   -128   
640    400    
-288   96     
96     -16    
208    16     
-32    32     
-32    96     
-64    -32    
-64    -48    
176    64     
-160   96     
400    288    
-176   240    
0      80     
80     -128   
128    -224   
64     -64    
192    96     
16     32     
-128   0      
112    320    
-48    400    
-304   80     
48     16     
144    80     
-16    0      
0      80     
-96    -64    
-32    -32    
304    112    
80     176    
-160   464    
96     448    
-48    224    
-32    48     
416    32     
-192   0      
-32    64     
-208   -128   
288    64     
240    112    
-496   112    
336    288    
-240   96     
32     96     
128    112    
64     -16    
-96    -16    
-48    32     
-48    -96    
-48    16     
-144   -224   
240    160    
-32    16     
0      16     
192    -16    
32     0      
192    -48    
32     48     
256    128    
-144   -32    
192    64     
112    16     
144    128    
0      32     
-48    -32    
-176   -176   
16     48     
144    304    
-240   96     
-48    144    
48     32     
112    192    
240    128    
-176   96     
160    176    
-128   176    
-64    -48    
176    192    
16     128    
-64    64     
-80    64     
80     -384   
-80    96     
144    48     
-112   32     
208    224    
-208   64     
64     144    
240    272    
-336   0      
112    48     
-48    32     
96     80     
32     -112   
96     144    
-32    80     
-304   -544   
240    32     
16     224    
128    336    
96     16     
-80    128    
272    32     
-48    32     
16     80     
80     64     
112    96     
-48    96     
0      -128   
144    64     
112    272    
-160   -192   
-16    -16    
416    -176   
-176   208    
-192   -144   
240    64     
-80    96     
128    -32    
176    352    
-64    128    
-80    48     
128    144    
0      0      
240    320    
-160   192    
0      240    
48     144    
-304   -784   
336    -80    
0      176    
-176   96     
48     0      
-32    32     
96     16     
-16    192    
80     32     
16     -64    
80     48     
-48    -144   
-112   64     
208    -64    
-80    96     
64     -240   
48     0      
0      -864   
48     48     
112    80     
-32    80     
144    96     
16     80     
16     0      
16     112    
80     64     
-32    -48    
-48    48     
192    128    
0      0      
176    32     
-96    128    
-64    -64    
208    96     
0      96     
160    80     
-64    -96    
-16    80     
80     272    
240    224    
-96    48     
288    96     
-304   176    
-384   -1120  
640    144    
-272   -144   
-96    -128   
256    -272   
-80    128    
304    -416   
64     -144   
-96    -64    
256    128    
16     16     
160    -16    
-32    112    
80     -160   
32     192    
-16    64     
-32    16     
96     128    
-96    32     
-32    -208   
112    224    
-64    -384   
-48    -80    
160    -160   
48     80     
64     -160   
192    -192   
96     -336   
-96    -944   
96     -352   
112    -96    
224    208    
16     128    
64     128    
32     -48    
-16    160    
96     144    
224    176    
16     112    
160    -704   
16     -224   
176    224    
-16    -400   
48     -800   
-128   -560   
304    304    
-128   -272   
80     -640   
-16    384    
0      -144   
256    -16    
-160   48     
192    -32    
-320   -496   
400    -272   
256    256    
-1136  16     
-48    208    
0      -224   
128    128    
-192   -80    
-48    -656   
144    -208   
-64    144    
320    208    
-96    -96    
80     -352   
336    -512   
-16    96     
48     160    
224    -368   
240    128    
80     368    
-48    -16    
-80    -768   
0      -256   
400    176    
-192   560    
-80    -1376  
304    -304   
-112   160    
-16    32     
256    -32    
-160   224    
16     -240   
16     -336   
-592   -208   
80     -192   
-144   256    
384    32     
-240   -224   
16     0      
208    112    
-128   -448   
208    -112   
-368   16     
272    64     
-16    48     
16     -16    
16     0      
64     208    
-144   448    
176    -112   
-416   -528   
-160   -464   
336    -240   
80     224    
0      160    
144    -560   
160    304    
32     -112   
192    192    
-16    208    
224    192    
112    496    
-160   160    
-144   -416   
-16    -320   
-80    0      
-16    -384   
-272   -288   
128    -320   
-48    208    
384    -32    
-144   240    
0      -1280  
128    272    
-32    416    
-64    -224   
-240   -64    
320    48     
80     144    
-112   -112   
-352   -16    
112    -176   
-224   48     
0      16     
-240   64     
96     -256   
-16    48     
-32    -432   
96     160    
16     -64    
0      -80    
-16    -640   
96     -208   
224    608    
-592   -576   
112    -448   
112    784    
-192   224    
128    -272   
-32    96     
-64    -384   
16     32     
-48    -160   
112    304    
48     -240   
128    224    
-128   -128   
16     -368   
-48    -16    
-64    112    
48     32     
-160   -240   
80     32     
-32    -48    
32     -112   
192    -272   
80     -64    
-240   -272   
-112   176    
16     592    
-1072  64     
-32    -144   
48     -32    
-16    640    
144    224    
-208   -32    
64     -80    
-400   -64    
-752   -144   
32     0      
-272   -112   
-16    -48    
304    -176   
-112   -112   
-80    32     
-112   32     
0      304    
-528   272    
-112   192    
112    -288   
-288   -176   
256    -128   
-240   160    
32     -144   
-80    128    
-128   32     
16     112    
-16    64     
-304   -96    
96     96     
-528   -112   
368    48     
-288   64     
-160   16     
-96    -112   
-224   0      
112    -16    
0      80     
32     -64    
96     64     
-144   -64    
208    48     
-96    16     
-160   64     
304    0      
-240   32     
80     16     
-128   288    
-208   288    
-880   0      
16     64     
-208   128    
464    -32    
-608   -272   
400    64     
-176   -272   
-112   80     
128    144    
-192   64     
-80    144    
-64    32     
-112   -112   
-368   -224   
128    -192   
-320   128    
224    16     
-240   96     
-48    96     
-96    -80    
80     32     
-80    -32    
208    112    
-240   -144   
16     -192   
-240   -96    
-96    64     
-160   48     
-16    64     
320    176    
-256   0      
-176   80     
-560   96     
128    320    
48     16     
-64    -80    
80     -80    
80     -128   
48     -96    
-64    -64    
-16    -96    
144    -240   
224    64     
32     112    
-128   64     
-192   -16    
-48    48     
80     16     
48     224    
48     208    
96     272    
-16    112    
-112   160    
-64    -16    
144    112    
112    -16    
-144   64     
-240   -128   
-96    48     
160    96     
-48    48     
-80    128    
-80    144    
80     80     
-480   -128   
-48    -64    
32     64     
16     160    
-208   64     
-48    288    
96     32     
0      80     
160    32     
-48    64     
0      16     
-96    -16    
64     96     
64     96     
-256   160    
80     128    
-224   -16    
-48    32     
288    336    
-320   112    
-160   -96    
0      32     
-48    0      
-32    -64    
-176   48     
240    80     
-368   -144   
336    224    
-400   -112   
112    144    
80     80     
48     48     
64     32     
-32    0      
0      -16    
32     32     
240    96     
-192   48     
64     112    
-128   144    
96     0      
-192   -32    
128    80     
-112   96     
96     256    
80     48     
-144   -96    
112    -224   
48     64     
-48    96     
-48    48     
-48    -112   
32     0      
-96    -16    
16     16     
80     -80    
-208   -96    
128    176    
-224   112    
0      112    
96     112    
-32    48     
-96    288    
0      144    
144    48     
-32    -192   
160    144    
-64    96     
-48    96     
-48    96     
64     48     
112    112    
16     -32    
-160   -16    
240    144    
64     64     
-16    16     
144    112    
0      -80    
64     496    
32     384    
-64    128    
224    304    
-208   144    
64     128    
176    48     
-208   -48    
80     208    
128    288    
0      256    
128    -16    
-64    176    
96     160    
16     96     
144    64     
-176   112    
0      -336   
-112   -192   
64     128    
16     288    
-48    112    
-48    -96    
0      -336   
-80    -176   
128    336    
112    272    
-144   -32    
32     -672   
144    176    
-80    -144   
48     -304   
320    928    
-160   32     
128    -352   
-96    176    
368    -832   
-96    240    
112    -368   
48     112    
80     224    
-160   -16    
112    -496   
80     368    
80     464    
-112   -288   
0      -384   
224    736    
-96    80     
144    176    
0      128    
224    368    
-240   304    
-32    -416   
416    480    
-240   -96    
544    208    
-272   0      
224    -240   
208    304    
-80    -48    
-16    112    
-160   0      
64     -208   
-32    96     
128    304    
224    288    
-128   96     
-16    -448   
-64    -96    
128    -128   
-624   -704   
32     -336   
0      224    
224    320    
-16    352    
304    240    
16     512    
-208   -176   
32     -272   
16     16     
448    -96    
-352   64     
288    -160   
128    80     
304    -240   
80     -96    
-352   -1440  
544    -128   
-336   112    
-64    -64    
192    -368   
-560   -288   
384    0      
336    416    
-32    512    
-304   -544   
304    -496   
-128   912    
192    -448   
-32    -160   
160    128    
-240   -976   
256    128    
144    -304   
64     80     
48     -16    
208    -96    
-64    144    
-208   96     
48     16     
-80    -32    
-96    0      
0      -48    
32     -272   
-96    -672   
208    672    
80     -400   
-128   32     
0      176    
112    0      
-288   -192   
-32    448    
-16    -80    
-16    80     
112    96     
-80    -256   
96     96     
0      -368   
64     112    
-48    -336   
528    400    
-208   -192   
-112   -224   
0      -416   
240    1648   
-160   -192   
352    -272   
-192   752    
-80    -688   
240    208    
-288   -768   
192    -16    
160    368    
-272   -352   
384    -208   
-160   -32    
48     112    
208    32     
-64    -240   
144    48     
320    272    
-240   -544   
-176   -224   
-32    -96    
144    -992   
16     192    
48     -272   
144    -144   
128    160    
-64    -512   
144    192    
-192   -256   
160    -240   
48     0      
176    -112   
16     80     
64     -128   
64     -48    
-1136  -176   
96     -560   
-64    -112   
64     -112   
-144   -288   
256    -240   
32     -208   
-48    -96    
128    -64    
64     -496   
-32    -96    
32     -96    
96     64     
0      -368   
96     -80    
-464   -64    
128    -160   
32     -16    
256    -128   
-48    -64    
-16    -480   
160    160    
-64    16     
48     112    
288    -176   
-240   16     
96     -64    
32     208    
32     -32    
0      64     
-80    64     
16     -16    
96     -112   
176    -272   
-160   -16    
208    -240   
-16    -16    
224    -736   
16     -144   
96     -304   
32     16     
224    -32    
48     48     
-16    0      
48     80     
-176   -144   
-192   0      
-1408  -96    
-272   -80    
240    -32    
144    64     
-64    -96    
-352   -544   
208    -320   
176    -224   
-32    224    
208    160    
-144   -16    
32     80     
-80    112    
64     80     
16     -144   
-48    -224   
176    -112   
-672   80     
64     -160   
-16    -16    
0      -288   
48     -16    
112    -1376  
64     16     
-16    -48    
16     -144   
64     -128   
144    -208   
-176   -32    
384    0      
-272   -144   
208    -384   
-400   -80    
-32    -192   
272    -160   
-112   -208   
176    -64    
-48    -720   
-16    0      
-48    -192   
-48    -80    
-48    -32    
-160   -112   
160    -96    
64     -128   
-176   48     
80     160    
-112   400    
256    1312   
336    976    
-160   144    
-64    80     
208    -496   
144    192    
-256   -272   
288    -288   
-160   -208   
240    176    
160    64     
176    80     
192    -32    
0      -128   
32     96     
32     -32    
96     -32    
-128   -592   
0      48     
32     80     
16     128    
-16    352    
272    112    
-192   -112   
32     -112   
-48    -48    
-16    -32    
32     0      
160    0      
-400   -160   
-432   -304   
64     -80    
-1552  -256   
-16    80     
-544   -224   
320    48     
-160   16     
-848   16     
-80    64     
-112   -96    
-64    48     
-64    128    
48     48     
16     -32    
-96    -112   
112    -208   
80     176    
128    -64    
96     96     
144    128    
-304   0      
80     80     
-320   16     
-96    64     
224    176    
-128   192    
-320   0      
112    32     
-112   -592   
96     -32    
0      48     
-112   32     
16     0      
0      -80    
-16    16     
0      80     
16     192    
-48    112    
-144   96     
-224   144    
-144   16     
-976   0      
48     -48    
-192   -112   
32     -16    
0      -144   
64     128    
96     -144   
-32    64     
-112   128    
-80    -32    
-32    64     
-32    0      
-64    64     
32     16     
-176   64     
64     128    
96     -80    
-352   -160   
176    48     
-32    -48    
80     176    
80     -48    
-112   240    
208    272    
-176   96     
-16    272    
128    16     
-272   0      
32     16     
0      80     
96     32     
0      208    
-848   96     
64     368    
96     -176   
-128   112    
160    -368   
-128   -560   
-32    -448   
32     -160   
-32    -144   
-32    -32    
240    336    
-320   -288   
32     -176   
-16    -128   
-48    -80    
-608   -256   
32     176    
16     -16    
32     64     
32     16     
-48    256    
-96    -176   
-48    16     
96     288    
0      176    
112    64     
64     608    
-32    -496   
-240   400    
-64    -368   
-64    -240   
-112   -368   
-384   -192   
-256   592    
-48    272    
-208   -112   
-32    -16    
-128   128    
-80    -16    
32     -16    
-96    144    
96     16     
-128   144    
-80    16     
128    128    
-144   -304   
-32    96     
-32    112    
-80    16     
16     80     
0      64     
-48    96     
176    176    
-336   -160   
-80    -416   
176    64     
-176   -48    
64     160    
-208   192    
144    176    
-192   80     
-16    288    
32     16     
-192   -64    
416    80     
-128   176    
16     -64    
-16    80     
-16    96     
608    544    
-368   672    
-32    352    
16     336    
-48    368    
624    208    
-336   352    
32     80     
160    16     
-144   240    
112    32     
-304   176    
160    -192   
48     224    
160    288    
-112   32     
224    48     
32     240    
256    0      
-272   -96    
288    32     
-240   48     
96     -304   
-32    -192   
-272   -592   
-80    -432   
48     16     
16     64     
-256   400    
208    96     
-80    -208   
-128   -80    
-64    -368   
352    384    
-272   832    
-192   -32    
176    0      
-128   -48    
-240   -112   
80     48     
64     -80    
-288   -16    
-272   -48    
192    176    
144    144    
-192   -208   
-48    -176   
16     288    
-32    -32    
48     80     
80     160    
-80    -112   
208    896    
-80    -112   
176    -80    
-80    -464   
-32    144    
64     208    
-64    -160   
144    336    
-32    592    
48     -32    
112    384    
336    320    
320    1072   
-480   -432   
448    -640   
112    608    
-176   -144   
144    48     
-96    -112   
-96    -96    
16     144    
-160   -704   
96     352    
176    576    
16     144    
-32    48     
96     -176   
-96    400    
112    -112   
-368   -96    
32     -288   
-64    -80    
80     96     
-80    -192   
64     -192   
-16    -64    
32     16     
192    -16    
256    -400   
-32    -416   
112    96     
32     -80    
64     -80    
192    352    
96     272    
112    -320   
144    0      
64     -128   
272    208    
96     688    
160    352    
64     112    
128    144    
-160   -528   
32     96     
160    16     
-64    304    
288    256    
-112   -48    
80     416    
-80    -1632  
32     -48    
176    -64    
48     64     
48     16     
-32    16     
240    32     
-144   208    
-48    64     
304    384    
-240   192    
208    320    
-320   240    
48     -208   
48     176    
96     -560   
-80    -16    
-48    -784   
304    144    
-176   128    
304    128    
-368   -16    
128    80     
0      64     
96     176    
-112   -64    
0      -32    
48     -208   
-64    -144   
96     96     
-48    32     
-80    -32    
240    -80    
-64    32     
16     -96    
32     112    
-16    -16    
64     160    
-144   -352   
96     -224   
176    112    
-80    128    
160    96     
48     -160   
80     144    
160    -512   
-112   128    
0      -496   
112    128    
-144   16     
112    128    
-64    -16    
192    64     
-32    32     
192    64     
16     80     
64     64     
48     96     
320    -224   
-208   192    
96     -320   
-256   -80    
16     -272   
256    -208   
96     -320   
144    80     
144    0      
48     -80    
32     -256   
-32    -16    
96     320    
80     272    
-16    112    
-16    -208   
-64    144    
0      -192   
208    0      
96     160    
48     208    
-32    -1472  
32     -80    
128    -16    
128    208    
16     -80    
-32    -80    
144    -1552  
-128   -16    
32     464    
80     32     
-112   240    
64     -64    
-192   64     
112    -112   
-144   32     
48     -128   
0      -560   
288    272    
-272   64     
-16    -48    
-272   -224   
80     -464   
-32    -160   
128    -832   
32     32     
16     -240   
0      -80    
96     64     
0      -384   
-160   -800   
144    0      
48     -352   
32     -176   
96     -96    
208    -112   
-336   -112   
48     -400   
48     -128   
224    48     
-32    240    
-16    -352   
-16    0      
240    272    
-176   0      
64     -16    
208    64     
-64    -64    
16     -176   
-224   -80    
176    -192   
-480   -240   
352    112    
32     -80    
32     -16    
240    -128   
-16    -784   
192    80     
80     -64    
0      -80    
160    -32    
-96    -16    
208    -16    
-16    0      
80     48     
144    96     
-160   64     
-16    -16    
-1376  -160   
128    -48    
96     -64    
128    -48    
240    256    
-240   192    
-96    176    
192    -144   
-16    48     
32     -176   
64     -224   
96     96     
192    16     
-144   80     
-32    -48    
-432   32     
64     -16    
256    96     
32     48     
32     48     
16     -448   
-96    -32    
176    -1648  
-96    240    
-128   -16    
64     32     
96     32     
16     -192   
0      48     
-224   -16    
-160   96     
224    128    
-544   0      
16     -208   
96     0      
48     -208   
0      -176   
-128   -1056  
192    48     
-64    80     
-16    -64    
-160   0      
48     -128   
-224   -48    
160    32     
-128   16     
16     32     
-176   -32    
32     32     
80     -64    
80     160    
592    992    
-192   528    
-240   -752   
432    256    
-208   208    
32     -176   
-16    -48    
16     128    
64     -32    
32     64     
-32    -80    
-80    -48    
144    -80    
48     112    
16     -48    
128    96     
64     -592   
224    -112   
-144   -592   
160    0      
-256   -576   
240    672    
-224   -144   
-32    96     
-224   -16    
48     -96    
-176   80     
112    -32    
48     160    
-1600  -480   
192    112    
-1440  -496   
-224   -784   
-32    640    
-336   400    
-160   160    
-240   64     
80     -96    
0      64     
96     -16    
-16    32     
96     304    
-880   -16    
64     -320   
-128   -176   
-32    -16    
144    64     
16     160    
-16    -64    
-400   -144   
64     -256   
-272   -336   
-16    -240   
32     -160   
320    320    
-96    128    
80     96     
-192   -80    
96     112    
16     -48    
256    144    
-176   0      
-16    -32    
-112   64     
64     -64    
-112   32     
-32    64     
-32    80     
-1200  -32    
-144   -96    
-1600  -688   
0      -160   
-400   -368   
272    -96    
-16    0      
32     48     
32     240    
-80    256    
-112   128    
400    272    
-320   32     
-192   -16    
0      -112   
-624   -192   
-16    -48    
64     -16    
288    480    
48     224    
-128   320    
432    32     
-448   -80    
80     -80    
64     -32    
48     160    
-176   -240   
-16    32     
320    336    
-672   96     
-176   -96    
176    416    
-1872  -128   
160    -416   
-112   128    
32     64     
48     64     
16     320    
-128   48     
-16    64     
208    96     
-208   16     
-192   144    
400    -144   
0      32     
48     32     
32     48     
-432   -48    
-32    144    
176    272    
-304   -352   
-240   -1152  
-96    16     
176    384    
-80    -416   
48     192    
192    176    
-48    208    
16     -240   
464    528    
-144   448    
464    256    
-256   432    
576    704    
-576   -400   
48     -352   
432    224    
-272   384    
48     288    
-160   -368   
-496   -880   
16     -352   
-144   -160   
-160   16     
64     176    
176    304    
-176   304    
-304   -272   
480    224    
-64    -80    
32     32     
416    592    
128    560    
-128   208    
-64    -16    
-16    16     
-16    128    
32     160    
128    128    
-256   -32    
-144   0      
112    112    
-160   0      
-32    384    
112    352    
-128   96     
32     224    
80     208    
64     -16    
-144   32     
-240   -368   
48     -224   
224    -112   
-64    208    
32     144    
-160   80     
336    352    
-448   -16    
48     176    
304    144    
-112   240    
208    336    
240    160    
-32    64     
0      144    
64     0      
-144   -64    
64     80     
-192   -80    
144    16     
-64    -48    
336    96     
-96    -64    
-64    80     
96     48     
-64    128    
208    112    
-176   80     
16     64     
-96    48     
16     32     
-144   -128   
128    64     
-32    80     
80     80     
0      16     
32     112    
-128   -16    
32     -80    
16     16     
48     144    
-400   -192   
432    16     
-80    208    
208    -80    
64     32     
-32    -32    
-32    0      
-80    -80    
48     80     
-80    16     
96     144    
-32    80     
112    128    
176    208    
-80    144    
64     192    
112    112    
80     96     
96     80     
16     -16    
-32    -16    
160    96     
-64    0      
0      96     
64     64     
48     96     
16     -64    
-96    48     
144    128    
-208   128    
96     80     
-32    96     
48     80     
-16    16     
-48    16     
-112   -64    
80     208    
-80    -64    
-96    48     
80     -160   
-96    -192   
48     224    
96     160    
-288   32     
-64    112    
-112   16     
176    160    
-64    64     
32     96     
64     432    
64     176    
-64    128    
-32    64     
-32    128    
192    144    
48     176    
48     240    
176    -752   
-48    64     
-16    0      
-144   48     
80     80     
128    80     
-112   -128   
80     160    
80     -16    
80     -32    
32     -16    
48     144    
-32    48     
32     -160   
80     96     
-16    -1504  
176    0      
112    176    
48     112    
-80    48     
176    128    
0      112    
0      32     
16     128    
32     96     
-64    -16    
176    -16    
-48    32     
224    -16    
208    80     
-112   -912   
16     -48    
176    -368   
-80    16     
-32    160    
176    96     
-112   64     
160    144    
-32    -64    
16     80     
240    160    
32     -112   
48     256    
272    32     
-80    48     
80     -144   
32     80     
-64    240    
240    16     
-64    112    
144    112    
-160   -224   
240    48     
0      128    
80     96     
64     32     
80     -80    
48     16     
32     -112   
80     144    
272    -288   
80     160    
-176   -224   
80     64     
48     64     
-64    16     
-16    -112   
112    160    
-64    80     
-16    112    
288    96     
-16    -64    
-80    -112   
16     -368   
368    176    
128    112    
0      96     
256    -544   
-112   224    
16     224    
-112   224    
-16    96     
128    32     
-64    -80    
144    -112   
208    48     
-48    -128   
-144   0      
176    -16    
64     128    
-144   -240   
96     80     
144    -80    
144    144    
-64    -352   
256    224    
64     272    
-48    144    
-112   32     
-64    -752   
-64    -256   
128    -128   
-80    -80    
48     -272   
0      80     
96     -224   
-16    -304   
272    -16    
-128   16     
32     -32    
-64    -432   
-48    -32    
96     -1104  
-240   -464   
224    416    
-128   -384   
-48    -80    
-48    -384   
256    304    
64     288    
32     -224   
256    400    
-64    -320   
80     64     
16     144    
96     -432   
64     16     
96     -192   
-144   -352   
-688   -240   
-64    -528   
176    512    
80     272    
96     96     
-176   -112   
512    64     
-320   -16    
96     -96    
96     -272   
48     80     
80     96     
64     112    
-96    -48    
32     -128   
-768   -80    
48     -96    
-208   -48    
336    -48    
-48    96     
-16    -896   
-96    160    
80     -1520  
32     -80    
16     -160   
-16    -48    
16     -80    
16     -128   
112    96     
128    16     
-240   -112   
160    176    
272    224    
80     176    
112    -256   
96     -128   
80     -48    
-16    -416   
128    16     
-80    -32    
80     64     
0      -192   
-112   -320   
64     -96    
128    16     
-80    64     
112    144    
-640   352    
-272   -80    
-176   -352   
-192   -960   
384    -544   
-176   -496   
128    -496   
-16    -368   
-48    32     
96     16     
32     48     
16     64     
32     48     
-448   -576   
32     -480   
-224   16     
-112   -112   
-800   64     
0      0      
192    48     
64     -304   
-64    80     
0      -1152  
-208   -576   
256    -96    
-112   448    
-64    80     
16     16     
-224   32     
144    -192   
-80    -208   
16     -16    
80     -144   
352    80     
-64    800    
32     -544   
-64    -272   
80     112    
416    640    
-320   368    
-160   -640   
-160   -352   
592    448    
-432   80     
272    -320   
-304   128    
272    0      
-80    -80    
144    -16    
80     48     
-96    -688   
192    384    
-16    48     
-16    -208   
-240   544    
-464   -576   
-64    -432   
-48    -400   
-272   -208   
176    -16    
-160   352    
-80    -272   
-352   -224   
80     -480   
-80    -384   
128    -320   
96     -176   
-480   -224   
-656   112    
192    192    
-96    -48    
-64    32     
96     -256   
-240   -176   
128    -80    
-256   -16    
32     80     
-160   -48    
-176   -144   
-96    -112   
160    -160   
64     112    
64     64     
-128   64     
-32    352    
0      16     
0      16     
-1312  224    
-480   -16    
16     -80    
160    160    
32     -112   
0      -320   
192    -288   
64     176    
-96    -144   
-32    32     
96     0      
-80    -32    
64     176    
-144   160    
-176   16     
144    400    
-480   176    
-176   96     
-208   144    
96     -16    
-112   0      
-288   -224   
144    32     
16     16     
-80    32     
16     160    
-48    0      
-112   48     
-112   48     
-112   176    
-48    80     
-80    64     
-272   16     
-64    16     
96     -64    
-96    176    
-32    -96    
32     208    
48     0      
-48    -32    
176    48     
-176   -48    
-96    352    
-128   32     
112    128    
48     -48    
-288   48     
-496   0      
80     32     
96     -64    
16     96     
48     48     
-112   -32    
0      96     
160    48     
-144   -16    
-48    48     
64     64     
-32    -64    
-144   64     
-64    -16    
-48    48     
-48    144    
-96    288    
-272   80     
176    336    
-368   -192   
16     64     
160    112    
32     96     
80     32     
16     16     
-64    32     
384    448    
-688   96     
112    -16    
-48    64     
32     48     
112    128    
-352   -160   
192    32     
16     -80    
-48    48     
96     -80    
-160   64     
160    32     
-160   256    
128    -16    
-224   -128   
80     112    
112    16     
-224   32     
-80    -16    
32     128    
-624   -368   
160    32     
-1168  -128   
-64    80     
0      -16    
-80    -32    
32     0      
80     48     
16     16     
-112   -48    
80     16     
-96    96     
-96    -32    
-176   -48    
48     176    
-160   0      
96     144    
-240   0      
320    112    
32     64     
-432   -240   
400    -64    
0      128    
-48    16     
0      32     
-32    48     
48     80     
176    128    
-176   48     
-192   -112   
176    80     
-32    -224   
-64    32     
80     16     
-208   144    
64     64     
64     16     
96     32     
-256   -16    
256    192    
112    160    
-160   -176   
144    128    
-64    80     
-16    112    
-32    -80    
-48    -16    
80     16     
-256   -48    
368    336    
48     64     
-16    -112   
208    96     
-208   16     
-128   -48    
-16    48     
-16    32     
16     64     
-272   16     
-128   -64    
32     32     
-96    80     
32     48     
48     112    
96     64     
144    80     
-224   64     
48     0      
16     144    
16     112    
-16    32     
-16    16     
176    128    
-224   -48    
48     48     
48     96     
32     32     
96     160    
80     -32    
-128   -112   
48     -384   
-272   -16    
480    224    
0      160    
80     160    
-192   -80    
-32    -112   
144    -208   
64     64     
0      -1360  
-32    -32    
240    48     
112    816    
192    272    
-192   -160   
80     -128   
112    128    
0      96     
128    16     
112    208    
16     176    
-96    112    
0      16     
80     -48    
80     -272   
48     128    
-80    176    
32     -48    
112    -176   
-256   -320   
64     -160   
0      80     
-160   48     
16     144    
-48    0      
96     240    
80     736    
-64    192    
176    96     
-32    -448   
-16    32     
-144   -656   
176    -560   
64     0      
144    208    
-64    128    
32     160    
-256   -128   
-32    16     
16     224    
-32    112    
48     96     
192    224    
-80    -144   
0      -496   
160    288    
-304   -848   
96     -1024  
400    192    
-224   160    
208    16     
48     96     
-80    0      
64     64     
32     368    
384    400    
-160   464    
-48    -64    
224    -576   
176    224    
-176   112    
80     -864   
16     -128   
16     64     
-176   -400   
160    -64    
0      320    
-32    -192   
96     112    
-16    32     
112    16     
-48    -112   
64     -272   
-128   -144   
208    -16    
0      224    
-64    -240   
64     -48    
-48    -208   
96     240    
208    16     
32     48     
-128   -16    
128    64     
-48    32     
-32    32     
48     96     
288    -64    
-80    80     
80     -144   
16     48     
16     -384   
80     80     
-192   -608   
192    -272   
0      -544   
-16    -144   
0      -176   
176    -48    
-32    112    
16     368    
-48    208    
16     -96    
-160   -224   
16     -528   
176    -16    
32     -96    
-16    32     
112    128    
192    80     
-224   -704   
176    32     
160    96     
-96    80     
32     48     
-64    -624   
80     -48    
0      -144   
16     240    
48     176    
48     128    
64     -128   
-32    144    
-32    -240   
-96    -272   
80     -352   
16     112    
352    672    
112    -48    
-304   -352   
48     -576   
80     0      
0      16     
-16    64     
64     -80    
96     96     
-224   -640   
32     -272   
96     -176   
-96    -128   
112    -80    
-48    -1232  
192    112    
64     -560   
-48    -1200  
160    -224   
80     -640   
160    144    
-144   608    
160    -816   
32     336    
-112   32     
160    -352   
64     16     
-80    -416   
-16    -1024  
384    -672   
-96    384    
256    272    
32     -336   
96     400    
-208   -368   
176    -144   
48     -368   
-64    -144   
64     -272   
224    -32    
176    320    
144    224    
80     -208   
96     0      
144    -32    
-128   112    
-176   160    
-80    208    
-1376  80     
-144   -96    
560    544    
-544   -16    
0      -192   
-32    -656   
112    -128   
32     96     
-160   -112   
144    -256   
128    144    
688    -16    
-480   -160   
96     16     
-160   -32    
-592   -112   
-112   -96    
192    32     
64     96     
-80    64     
432    432    
-704   -32    
256    -880   
-304   32     
224    -80    
-16    16     
64     -112   
96     -128   
-32    -160   
-352   -64    
304    -144   
-288   160    
384    128    
-240   -64    
160    -16    
272    -160   
-368   -16    
208    -576   
-96    -112   
-96    112    
-64    -208   
144    -16    
176    96     
-192   -16    
32     -16    
-48    -32    
-48    -32    
-1408  -48    
64     -336   
-144   -32    
16     -48    
192    144    
-384   -256   
16     128    
160    -2016  
-80    -32    
-240   -144   
-96    -272   
-48    -80    
-64    -64    
-48    32     
48     -80    
-592   -32    
-16    0      
-384   80     
-16    -16    
64     32     
32     -256   
96     144    
80     -1296  
64     -144   
96     -48    
128    80     
112    -32    
-64    -80    
-176   96     
-320   -112   
96     96     
240    96     
-160   16     
32     -256   
0      80     
64     -368   
64     64     
128    64     
0      -96    
-304   -112   
-208   -144   
-256   16     
240    -16    
-288   -64    
128    -48    
16     0      
0      16     
32     -32    
-64    -240   
-16    -32    
64     -96    
96     192    
-64    -592   
-176   -64    
-32    96     
112    16     
-64    -32    
64     0      
16     64     
176    0      
-176   -32    
16     -112   
-256   208    
400    0      
-256   48     
-160   -48    
64     208    
-240   -128   
-368   -240   
-128   -304   
-672   0      
-64    16     
-80    32     
96     96     
-96    -32    
-128   32     
160    -48    
-128   80     
16     -144   
-128   176    
-96    -160   
-496   -96    
32     -128   
-128   -80    
-48    0      
48     64     
-112   -32    
-848   -32    
-32    -96    
-16    -192   
160    48     
96     -128   
16     16     
-160   -256   
64     64     
-96    -224   
-80    16     
16     32     
32     80     
-176   -32    
-176   -16    
-176   32     
48     304    
-64    32     
48     112    
128    32     
-128   48     
320    208    
-336   -32    
176    96     
-96    96     
-128   0      
-32    -128   
-16    -48    
32     48     
-320   -160   
288    -16    
64     96     
-224   112    
-192   -32    
-240   -16    
368    -80    
96     64     
-64    -144   
160    128    
-64    80     
64     96     
-16    -64    
-224   -64    
224    16     
128    272    
-240   192    
-176   48     
48     -128   
-336   -48    
-32    112    
-1072  -48    
0      128    
-32    -32    
176    176    
-64    -16    
-96    48     
64     32     
160    288    
-32    -208   
-32    -144   
-16    128    
176    -208   
-16    -240   
-160   -208   
144    112    
-80    368    
112    352    
-112   -48    
-144   80     
0      -48    
-80    -80    
80     -16    
-144   -16    
48     16     
80     0      
-272   -208   
16     -1200  
16     -672   
64     -112   
176    64     
-320   32     
-80    64     
48     208    
-208   0      
-192   -608   
-240   -384   
112    -256   
-48    -896   
-128   -560   
-64    -368   
272    0      
-96    96     
112    208    
0      208    
32     208    
-640   -160   
16     -128   
64     48     
176    80     
192    16     
-80    160    
-48    272    
160    -64    
-352   304    
32     480    
-208   -304   
272    -448   
-48    336    
128    32     
-80    -144   
-80    -80    
-128   608    
16     -384   
-336   -864   
384    256    
-256   112    
32     -176   
144    80     
64     304    
128    -32    
-208   80     
0      -160   
304    320    
-320   320    
48     -48    
176    64     
-128   176    
-128   -80    
16     -48    
-48    160    
-144   -112   
-32    112    
304    96     
-368   -64    
160    64     
208    80     
-320   -80    
224    96     
-48    -16    
-48    64     
32     96     
288    240    
32     128    
-112   -144   
-144   -448   
48     -80    
224    96     
-192   80     
48     32     
-64    -16    
-288   -224   
208    -704   
-128   -288   
288    -80    
224    352    
80     624    
-112   -112   
96     96     
192    384    
16     624    
48     80     
-96    16     
96     -176   
-112   -368   
16     -512   
112    16     
0      160    
-64    -144   
112    80     
0      48     
-64    96     
112    80     
-64    32     
48     32     
-48    64     
-16    0      
16     32     
-48    48     
64     64     
-16    48     
304    48     
-464   0      
240    112    
-304   -192   
-16    -2208  
144    -144   
32     256    
80     64     
128    336    
-144   368    
-144   -304   
-128   -544   
208    -80    
-304   96     
48     192    
80     48     
-128   -16    
112    96     
-48    -112   
112    -192   
32     256    
-64    224    
240    240    
-176   240    
-144   -192   
304    768    
-96    -192   
-176   -352   
112    128    
48     -80    
80     240    
560    864    
-176   896    
-128   -96    
16     -2208  
304    544    
-144   96     
64     96     
-160   0      
160    0      
176    224    
-192   -224   
-32    -96    
32     -736   
160    112    
176    592    
48     -64    
-112   -256   
208    -32    
-144   -544   
64     112    
-16    -192   
64     304    
64     240    
16     -64    
32     -192   
-112   0      
160    -256   
64     -96    
80     -144   
224    240    
128    304    
-176   -16    
32     32     
96     -16    
32     96     
-48    -240   
64     0      
64     80     
112    80     
0      32     
112    -16    
352    512    
-464   32     
144    32     
32     336    
-48    64     
0      -96    
208    96     
80     -32    
-48    16     
-32    -624   
160    -48    
-48    -368   
-96    144    
192    -112   
128    -16    
160    -64    
-112   64     
48     64     
0      -96    
128    96     
0      -16    
-112   -592   
64     -320   
112    112    
-96    -576   
64     80     
-16    112    
48     -112   
224    -112   
208    48     
96     80     
-128   80     
80     96     
112    48     
80     144    
80     16     
-64    -32    
64     -320   
96     -80    
0      -336   
288    160    
-80    64     
48     112    
-112   -80    
64     32     
96     192    
112    112    
-176   -16    
112    -432   
-64    -160   
112    -480   
448    528    
352    -64    
-320   48     
32     -352   
48     -128   
-32    -368   
32     0      
0      16     
176    160    
-32    64     
176    -128   
-144   -640   
80     -32    
-224   -768   
64     -80    
0      144    
224    128    
64     320    
-16    160    
48     208    
-48    -160   
160    -1104  
80     128    
208    96     
-160   48     
-304   -128   
192    -272   
-64    -16    
48     -576   
240    -128   
112    -192   
144    -112   
16     32     
80     -48    
-64    144    
352    176    
-176   48     
48     64     
128    -160   
-176   16     
-80    -80    
-80    -224   
64     -64    
16     -352   
192    -112   
176    -624   
0      208    
-48    -1264  
-240   64     
320    240    
208    -96    
-176   -160   
-128   32     
112    -192   
-32    -64    
-288   112    
272    48     
-2192  -80    
112    -176   
48     -192   
64     -160   
80     32     
112    0      
0      80     
32     -208   
256    160    
112    -80    
240    304    
-272   64     
16     -112   
128    -80    
128    -144   
-272   -48    
144    -32    
-176   176    
128    80     
208    32     
-208   -496   
352    -80    
224    -1392  
-112   16     
176    32     
96     64     
-112   32     
-16    -32    
-112   -112   
-16    -112   
-80    16     
48     16     
-736   -16    
80     -96    
-112   -128   
48     -160   
-16    0      
48     -528   
16     -16    
128    -16    
112    96     
-112   0      
96     0      
32     -32    
80     32     
-112   -48    
80     -32    
-576   -32    
32     -96    
-1520  -144   
48     -128   
80     144    
-16    -48    
64     96     
64     -432   
160    -112   
-48    -128   
128    -128   
-48    -272   
128    16     
-496   16     
16     -32    
-192   48     
-176   0      
-112   688    
112    368    
-32    -112   
32     -512   
-160   -224   
0      -112   
16     64     
272    0      
48     16     
-384   64     
0      -64    
-336   -208   
64     -400   
-112   16     
48     192    
-304   -368   
32     -464   
48     352    
-256   -512   
64     80     
-240   0      
112    64     
48     96     
-80    16     
-176   -48    
112    48     
-64    176    
-208   -288   
384    336    
-96    240    
-192   -176   
16     -144   
-32    256    
-784   -304   
0      256    
16     -336   
-576   32     
112    304    
-240   -256   
-144   64     
48     -48    
-16    208    
16     -224   
-80    -16    
-704   32     
16     -304   
-32    -64    
80     112    
96     -144   
-192   176    
80     128    
-240   176    
-448   -576   
-704   496    
-256   224    
-128   160    
-272   -224   
160    -160   
-240   208    
-416   -208   
240    96     
-192   -192   
192    64     
-512   -352   
-48    -48    
192    -32    
-160   -32    
-80    -288   
-176   96     
128    -96    
176    -144   
592    496    
240    784    
192    544    
-176   192    
64     -272   
608    -208   
-176   912    
64     -416   
192    -176   
-112   352    
80     -144   
-112   -144   
112    -368   
480    400    
-672   640    
-288   -544   
48     -512   
240    416    
48     144    
192    128    
-208   -224   
32     352    
112    -528   
-208   -400   
128    -80    
-208   -464   
16     192    
-112   368    
192    576    
-224   272    
-96    -96    
-112   16     
176    32     
-368   -320   
528    80     
-64    -48    
-160   80     
208    48     
-48    -64    
-32    -128   
128    352    
-160   416    
-128   48     
-224   -560   
48     -448   
144    336    
-416   240    
64     -16    
-240   -208   
-112   -176   
16     -192   
112    64     
-208   48     
48     -224   
96     -160   
-160   816    
144    -64    
-32    -80    
-32    112    
-112   -384   
128    560    
-320   -224   
-96    -592   
-192   -736   
320    816    
288    1312   
-240   464    
-176   -176   
320    -320   
-288   0      
-128   -48    
80     80     
16     -32    
-128   64     
-144   -16    
16     0      
-112   -32    
48     96     
-144   -16    
-144   16     
272    16     
-384   240    
208    272    
64     -112   
96     -96    
48     352    
-128   48     
0      -96    
144    -48    
-208   -112   
128    -224   
-144   320    
112    80     
64     112    
-368   -320   
208    -32    
-32    208    
-32    96     
64     -192   
-128   -160   
240    320    
64     112    
128    192    
-48    80     
-64    -32    
80     -448   
-144   -112   
48     -32    
-192   -144   
96     288    
112    192    
-144   192    
176    144    
-160   0      
128    -224   
-128   80     
128    48     
-80    48     
96     96     
-256   -32    
-32    48     
-240   192    
-96    -80    
400    -80    
0      144    
48     16     
-32    64     
-32    0      
64     80     
-112   96     
32     112    
-48    80     
-64    16     
48     128    
-272   -160   
96     -80    
-128   -80    
-16    -96    
112    112    
-64    80     
16     32     
-112   -16    
320    128    
176    448    
-256   0      
128    -32    
-64    96     
80     -16    
-80    64     
16     112    
-16    112    
-80    64     
-64    80     
-336   -192   
352    80     
-48    128    
80     128    
48     192    
-16    160    
128    144    
16     -32    
144    128    
96     -16    
-16    48     
32     -16    
32     0      
48     128    
64     16     
-64    0      
16     112    
128    128    
-64    0      
112    80     
160    16     
-496   -464   
304    -80    
-272   -272   
-144   -160   
160    352    
-176   80     
-64    64     
64     -112   
32     -928   
16     176    
112    -80    
304    -32    
128    32     
-16    192    
80     80     
-48    224    
-144   208    
-48    288    
-128   32     
-96    -32    
192    16     
176    -32    
-96    96     
64     -528   
-128   32     
224    128    
-96    -80    
-240   -96    
464    -64    
-64    -224   
80     -176   
-160   -160   
272    144    
-32    16     
16     144    
-64    80     
48     48     
-48    0      
80     -496   
160    48     
16     288    
-96    80     
176    0      
64     64     
320    144    
-320   112    
0      -80    
64     64     
224    48     
-240   112    
64     48     
-96    -64    
112    128    
-48    -224   
-16    96     
176    -80    
0      144    
96     256    
-256   64     
80     368    
128    80     
48     16     
16     128    
112    192    
272    304    
-304   64     
128    -160   
-112   -64    
-64    -192   
160    80     
-32    -496   
192    80     
-32    0      
160    48     
128    32     
-144   -32    
272    96     
-64    -176   
128    -352   
192    96     
208    48     
16     -160   
32     128    
112    -80    
16     -48    
144    -288   
64     128    
16     -256   
0      -160   
-80    -256   
96     160    
-16    96     
48     80     
16     96     
32     96     
112    32     
320    320    
-80    384    
80     -160   
32     0      
192    -192   
48     96     
-160   -64    
112    -64    
64     208    
208    176    
-144   -128   
112    48     
160    224    
80     -208   
32     128    
-16    -240   
48     -80    
-16    -448   
128    -144   
-32    -384   
-80    -48    
112    -224   
128    96     
32     224    
240    288    
-224   352    
160    368    
208    96     
64     0      
64     -64    
176    -144   
-80    112    
96     -64    
32     144    
16     48     
96     128    
-32    -256   
0      -208   
48     96     
240    -512   
0      -128   
240    192    
160    592    
96     352    
16     -928   
0      -112   
64     -688   
-16    48     
288    320    
-144   -272   
-112   -224   
64     144    
480    208    
-336   0      
256    -144   
-32    240    
-720   96     
288    -288   
-96    -96    
0      -528   
-112   272    
64     -752   
32     32     
48     -816   
192    -80    
32     -224   
32     -48    
96     16     
-224   -144   
-48    -464   
320    160    
-544   -176   
32     -160   
112    -128   
192    96     
48     224    
0      176    
112    112    
160    -112   
112    -64    
-384   -224   
-160   -480   
288    -352   
-16    512    
16     -160   
64     -112   
-128   -48    
288    -480   
-64    368    
80     -128   
80     -400   
-32    -176   
0      192    
-48    -32    
-144   -160   
48     -496   
-144   384    
96     176    
208    272    
-48    -160   
-112   -176   
96     432    
-128   96     
-240   -224   
32     -80    
-1168  320    
-112   -176   
144    64     
-16    -144   
-304   -272   
48     -2048  
-160   -80    
-16    -128   
208    128    
-16    64     
192    16     
-320   -32    
304    -112   
-272   0      
160    -32    
-528   -80    
736    576    
-416   48     
240    -160   
16     144    
-240   -336   
80     -208   
-48    -240   
304    208    
16     -128   
-64    -704   
112    128    
-144   336    
-16    -240   
0      544    
-128   32     
-208   416    
-48    -112   
-160   -464   
-464   -704   
64     -96    
160    832    
-192   -2528  
-32    -32    
-112   288    
-144   -144   
-48    48     
96     304    
-432   144    
48     -240   
-464   832    
-224   -448   
-16    -848   
80     320    
48     240    
-80    -1184  
160    -272   
-288   320    
-112   16     
-112   -288   
80     160    
32     -16    
-320   32     
208    80     
-240   -224   
32     64     
112    -256   
48     16     
64     -128   
144    16     
0      -128   
384    688    
-304   -176   
-336   128    
0      128    
208    -256   
-32    -208   
-240   -192   
400    112    
-80    208    
32     -208   
96     -32    
-16    -16    
-656   -64    
96     112    
-496   -224   
272    704    
-112   -592   
-304   -480   
-48    432    
-128   -112   
-240   -112   
64     128    
-176   -368   
80     -224   
-32    -160   
-96    -224   
32     96     
-144   -64    
-48    64     
-16    -128   
32     48     
-64    64     
32     0      
368    352    
-592   48     
80     16     
-320   -80    
-64    -32    
16     -96    
-208   -384   
0      96     
176    80     
-96    -48    
208    128    
-16    112    
-336   16     
-192   0      
-176   -112   
416    288    
-80    176    
-144   -96    
-320   48     
-48    64     
-544   -80    
64     16     
-16    -96    
48     64     
-64    -336   
144    -16    
32     32     
-240   -32    
-16    64     
32     288    
0      80     
-400   0      
96     16     
-400   -16    
-64    80     
-592   -16    
16     32     
-96    -32    
240    160    
-208   -128   
80     -16    
-64    48     
224    96     
-560   -32    
176    80     
-384   224    
208    -80    
112    -32    
48     0      
80     48     
-192   -80    
96     80     
-960   -160   
208    32     
32     128    
48     64     
16     112    
-64    32     
96     176    
-16    -16    
128    80     
-80    16     
-16    64     
112    128    
-64    16     
-640   -224   
176    48     
-544   128    
-160   48     
32     96     
-16    -16    
128    -48    
-128   16     
16     -80    
-16    -64    
48     320    
80     256    
-192   192    
-304   -16    
0      32     
-224   -96    
-304   -144   
-32    -352   
-96    -80    
48     16     
48     0      
64     112    
112    208    
-336   -48    
16     -144   
0      -80    
224    48     
-80    224    
-48    0      
64     96     
-128   64     
304    144    
-176   32     
144    192    
192    240    
16     224    
272    304    
112    144    
16     -192   
144    -80    
176    -16    
-16    -208   
432    -80    
-80    -288   
144    -96    
-320   -208   
336    64     
-400   -608   
-160   -496   
288    16     
-800   32     
80     96     
-192   112    
-368   0      
0      -16    
-48    64     
-112   -192   
80     256    
64     -80    
0      -64    
-160   -208   
112    96     
96     96     
-48    208    
16     96     
-160   -224   
-16    -192   
112    32     
-144   96     
208    64     
-320   -64    
96     48     
-96    176    
-176   -48    
-32    112    
-160   128    
96     -16    
16     0      
-112   -224   
304    32     
-16    48     
80     32     
32     32     
160    96     
32     96     
48     48     
0      64     
96     112    
-128   64     
96     112    
-32    -32    
-32    32     
112    144    
-128   96     
48     80     
96     16     
-48    80     
-160   -64    
32     -64    
32     -64    
16     112    
-160   32     
-16    80     
-64    0      
64     144    
144    160    
16     -96    
-144   128    
144    272    
16     96     
-112   96     
-32    128    
-16    64     
80     64     
-16    -32    
64     -16    
-32    16     
80     144    
-80    96     
80     48     
96     448    
-128   160    
336    48     
-160   32     
80     -32    
80     16     
112    64     
-16    16     
208    112    
0      64     
48     80     
-32    64     
32     96     
-208   -80    
176    -768   
160    32     
208    -1520  
-368   -368   
272    -304   
-160   0      
144    464    
-48    176    
96     48     
0      -16    
-16    -64    
-16    -272   
64     -32    
-16    224    
64     -80    
96     -144   
-16    592    
160    -368   
112    288    
-144   16     
96     176    
32     0      
-32    32     
96     -704   
144    560    
-112   16     
48     96     
32     144    
176    -48    
-80    64     
160    -80    
16     224    
48     -448   
-112   -1008  
224    -1184  
304    992    
16     672    
-48    -160   
16     -336   
160    208    
-64    -16    
144    32     
-96    64     
320    224    
-96    112    
-64    -256   
64     -16    
48     -160   
32     112    
80     -400   
-16    64     
288    240    
-112   304    
96     32     
224    176    
-64    160    
0      96     
64     0      
-112   -48    
96     688    
416    368    
-160   128    
720    192    
-1008  -160   
-144   -1520  
48     -608   
-96    -2032  
128    -160   
48     192    
80     384    
96     256    
176    240    
-176   384    
224    64     
-48    -208   
208    -464   
-192   -64    
0      144    
-112   -16    
192    -288   
-272   -48    
240    -112   
-128   304    
16     560    
128    -32    
-48    -528   
112    -32    
-64    -96    
-32    -368   
-96    -160   
-240   -496   
128    96     
-256   288    
-16    96     
-32    -512   
-176   -272   
320    -912   
-224   -32    
464    -176   
64     688    
-96    240    
0      -96    
-176   -160   
320    -288   
-336   -272   
176    48     
-64    112    
96     -240   
-48    272    
-192   -528   
368    16     
-176   -480   
0      416    
-160   1152   
336    -3232  
-208   240    
32     -128   
288    32     
-112   -368   
384    368    
64     320    
-224   -336   
-32    -16    
304    -272   
96     160    
112    128    
128    -144   
160    -736   
112    0      
144    -96    
32     576    
-768   -624   
352    -480   
32     608    
0      -208   
144    -48    
96     -544   
-32    -16    
128    192    
192    96     
160    112    
80     -64    
-112   -272   
176    176    
-32    112    
224    48     
-368   16     
80     -112   
32     -176   
-96    320    
176    -128   
-144   32     
208    -208   
112    -1312  
192    -160   
-144   -96    
160    -176   
80     -400   
-240   -624   
160    -368   
0      -192   
16     -240   
-96    -192   
-656   -80    
64     144    
240    -176   
-80    -336   
-48    -80    
-80    -336   
48     336    
64     -16    
32     -176   
160    -48    
-16    144    
-288   -32    
288    0      
-128   -80    
80     -80    
-352   -240   
-208   -352   
224    -176   
-96    -480   
160    -384   
-112   -176   
256    -128   
16     -608   
-32    -176   
128    -320   
32     112    
-32    -64    
-48    -288   
-16    64     
-32    64     
-240   96     
144    -80    
-272   -112   
368    -32    
-32    48     
208    -96    
-128   32     
32     -672   
128    -80    
64     -144   
-32    64     
48     48     
-96    -160   
80     80     
96     -192   
0      -224   
256    -224   
-176   80     
-64    -128   
-48    112    
144    -192   
-256   96     
256    -160   
-48    160    
48     32     
96     -256   
-128   -32    
176    16     
-64    -48    
48     -16    
-160   32     
-16    32     
-608   -160   
80     -240   
-80    -80    
48     -144   
48     0      
80     -240   
-48    64     
-80    144    
144    32     
-432   16     
32     0      
-160   -48    
128    16     
-288   -144   
304    -80    
-64    80     
48     32     
32     80     
-80    96     
16     176    
80     -224   
-176   -48    
-64    32     
-32    352    
32     624    
-64    -176   
-208   -448   
112    -128   
-48    128    
0      -16    
80     16     
32     48     
32     -16    
-672   -176   
0      112    
-240   -112   
-48    -96    
-224   0      
-256   64     
-32    112    
-96    -96    
-192   -48    
176    96     
-64    32     
16     112    
0      64     
-576   -80    
224    192    
-240   -176   
0      -32    
-64    -240   
16     -32    
-160   -416   
16     -144   
-16    -48    
-160   96     
-96    320    
16     -160   
-48    176    
304    48     
-144   -64    
-272   -96    
32     32     
-144   -64    
80     48     
32     96     
400    672    
-752   320    
16     -64    
-144   64     
-64    48     
0      96     
-272   144    
32     0      
-48    -32    
0      112    
-144   -208   
224    96     
0      -32    
-80    -32    
-80    48     
-192   -112   
96     160    
80     208    
-192   0      
592    592    
-800   80     
112    -80    
-112   128    
-1936  -240   
-32    16     
176    32     
32     32     
144    -112   
-336   -16    
192    -80    
160    80     
144    80     
192    64     
-224   -96    
96     -32    
-80    96     
-48    -16    
32     96     
-192   -32    
32     160    
32     16     
-112   96     
160    -640   
-128   16     
32     32     
80     256    
-352   112    
-64    -96    
32     -48    
-80    -112   
64     128    
-176   0      
32     128    
-80    -32    
16     112    
-1712  32     
-80    192    
-224   -32    
16     80     
32     48     
-128   32     
0      -16    
112    -48    
-112   -272   
48     -16    
128    -32    
-176   -192   
144    -240   
-96    -256   
144    -64    
-1312  -96    
128    -32    
32     176    
16     96     
0      -80    
-32    -96    
16     64     
432    672    
-384   -320   
96     -144   
16     -272   
-112   16     
176    256    
-112   -112   
112    128    
-176   144    
-240   -32    
272    -304   
-240   -96    
96     320    
176    192    
-160   -592   
368    336    
-112   64     
32     -32    
-80    80     
-128   -32    
80     64     
-192   80     
192    32     
-176   32     
16     -16    
32     128    
0      0      
-128   16     
48     -288   
-64    -64    
-32    -176   
208    -96    
80     784    
-16    288    
-112   -240   
160    -48    
48     0      
-224   -336   
0      -96    
48     16     
-16    16     
-192   0      
48     -112   
64     16     
80     176    
0      -32    
32     144    
64     112    
-112   0      
16     176    
-16    128    
-64    80     
-144   48     
48     -16    
-64    -16    
48     -208   
32     96     
128    608    
-16    208    
-80    -144   
80     -16    
96     1008   
0      640    
48     192    
-192   224    
16     304    
-112   -64    
-80    -32    
0      32     
80     32     
80     32     
64     48     
48     64     
112    32     
-208   112    
144    0      
-176   64     
-128   0      
160    112    
0      -64    
-304   -320   
-160   -720   
80     0      
0      208    
64     64     
0      112    
-112   -16    
96     -64    
352    528    
-16    400    
-688   -1216  
-224   -928   
64     112    
-176   352    
96     192    
-32    656    
256    336    
-144   464    
320    400    
-176   -208   
-256   -208   
64     -624   
-96    128    
320    352    
-288   112    
-64    -80    
80     272    
-288   -480   
-192   -800   
416    128    
-320   144    
-16    688    
208    -1152  
48     192    
48     208    
16     -144   
160    208    
144    192    
-96    48     
-176   112    
176    528    
144    1056   
-432   0      
48     -432   
-304   -64    
-144   -560   
112    -336   
464    32     
-336   -400   
16     -144   
272    -416   
96     176    
464    832    
-144   560    
80     48     
-32    -304   
224    384    
208    320    
-384   32     
112    -256   
96     -208   
-192   176    
144    224    
0      176    
160    336    
336    480    
-240   240    
-32    208    
112    32     
-176   176    
-112   -400   
-176   -16    
160    -48    
-112   32     
-32    48     
-16    -256   
80     -80    
208    -384   
128    48     
48     -1536  
144    176    
0      208    
48     560    
96     352    
-112   80     
144    32     
128    176    
-192   -16    
-64    -16    
256    112    
-64    -128   
224    208    
112    -32    
-96    80     
16     -112   
128    64     
-48    -608   
16     96     
272    144    
-128   128    
224    304    
176    96     
-64    -80    
192    32     
128    64     
32     -128   
-16    -16    
16     -512   
-16    256    
96     -144   
-96    112    
-112   -384   
96     112    
48     32     
0      160    
96     80     
64     64     
-96    -32    
48     -96    
64     128    
-80    -304   
256    0      
80     -144   
128    112    
48     -208   
-64    64     
32     -464   
128    192    
-112   -32    
0      144    
32     -144   
-80    144    
48     112    
-112   -160   
256    176    
-16    32     
48     80     
-64    -512   
64     16     
48     -208   
80     64     
-96    -224   
176    176    
-80    16     
80     -672   
0      112    
144    -16    
-16    -240   
-32    48     
224    320    
80     -64    
-64    112    
112    -144   
-32    96     
240    96     
96     80     
-112   192    
304    -528   
128    112    
-32    -16    
128    160    
-880   -32    
-112   -128   
208    -32    
32     -400   
64     -208   
-48    -720   
128    -80    
208    128    
-80    0      
32     -400   
0      192    
176    -416   
-224   0      
-16    -240   
208    64     
-1072  -32    
96     -32    
48     16     
400    -112   
-304   208    
64     -80    
-160   0      
144    -944   
16     -16    
32     -208   
-128   64     
144    -112   
176    32     
192    -160   
-192   -64    
32     32     
-144   -160   
-208   -32    
32     16     
16     128    
-48    -336   
144    -112   
64     -320   
-16    -160   
128    -48    
-96    0      
112    32     
96     96     
-160   0      
-32    -160   
-176   -96    
224    -64    
-960   -144   
240    -48    
-16    -144   
-80    -400   
160    -48    
-128   -336   
-16    16     
-48    48     
32     0      
112    -64    
32     16     
-416   -160   
272    80     
-160   -16    
240    -80    
-288   16     
96     -80    
-176   64     
128    -96    
32     -48    
96     -192   
-32    -208   
112    -624   
0      144    
16     -224   
160    -48    
48     112    
16     -160   
-80    16     
240    -112   
-384   -48    
-64    -720   
-464   -384   
224    32     
-64    160    
-96    -224   
96     240    
128    -192   
-16    176    
32     -16    
112    -80    
0      -16    
32     -96    
-96    -96    
160    0      
-144   -80    
0      -144   
32     0      
-224   -224   
80     -112   
208    -320   
-304   16     
256    -464   
112    176    
-160   64     
-32    -64    
-80    -144   
96     16     
96     -80    
-208   32     
272    -160   
-256   -144   
192    16     
-144   -384   
144    -528   
240    -240   
224    224    
128    48     
80     496    
-224   80     
-32    -176   
-64    -160   
32     -128   
32     0      
128    48     
32     80     
192    64     
-368   96     
144    0      
-400   -64    
16     -128   
160    272    
-32    -192   
-1328  -32    
-128   -96    
-352   96     
-64    96     
-144   -256   
-96    -48    
160    96     
-496   -256   
0      -272   
0      -304   
-352   -240   
192    -224   
-288   -16    
160    -112   
48     -80    
-256   -64    
128    -272   
32     208    
0      -224   
-496   192    
-192   128    
112    -112   
-16    48     
-64    112    
112    -48    
-288   16     
304    80     
-400   -96    
144    -32    
48     -16    
-32    64     
32     48     
-128   -80    
-224   -272   
-336   96     
-224   0      
-720   -192   
-32    112    
96     96     
96     -16    
48     -80    
-32    32     
-32    -48    
144    128    
0      48     
-64    -16    
-32    16     
-96    -32    
-80    16     
-64    -32    
0      48     
-240   16     
-80    0      
-128   -160   
112    160    
-16    112    
144    320    
-208   -16    
144    48     
-48    16     
-16    -112   
-96    -80    
224    128    
-64    288    
0      80     
160    80     
-240   -64    
144    16     
-592   -208   
48     -80    
-128   0      
16     80     
0      -80    
-16    -112   
112    0      
64     -16    
16     16     
16     272    
-176   144    
-96    -16    
-80    80     
-112   -16    
0      96     
-368   64     
144    288    
-304   -688   
272    -1152  
-64    -160   
320    -208   
-144   -160   
64     -128   
96     64     
-32    48     
0      144    
-176   -96    
32     96     
-112   -48    
32     112    
-80    -64    
-32    48     
-1760  -96    
176    80     
-96    32     
16     48     
64     144    
-48    528    
48     336    
-16    208    
-96    80     
-16    -128   
-112   -176   
240    192    
128    224    
-288   -240   
32     176    
-656   -48    
272    -1392  
128    368    
-64    464    
-80    -368   
112    320    
-112   -48    
176    -48    
-48    -16    
-144   208    
352    160    
-128   64     
176    48     
-320   -80    
144    96     
-160   96     
160    -192   
-96    224    
-128   384    
64     -64    
-144   -288   
112    -304   
-32    -96    
32     -32    
-112   -144   
64     -96    
-16    -32    
224    288    
-288   -32    
96     80     
48     -48    
96     -512   
16     -128   
160    128    
0      0      
336    352    
0      384    
16     304    
-64    96     
208    208    
-256   160    
0      0      
-80    624    
224    32     
-128   0      
208    96     
-144   32     
16     -176   
-144   16     
256    -144   
-448   -304   
752    -16    
-288   160    
208    80     
-96    48     
240    -96    
-272   208    
-48    -144   
-112   -32    
-128   0      
48     128    
224    -80    
176    -16    
-32    48     
-64    80     
-48    -64    
32     112    
80     32     
-48    80     
64     16     
144    64     
-368   -304   
48     80     
16     0      
-48    128    
128    -16    
192    176    
48     112    
-64    128    
96     64     
80     240    
-160   0      
48     128    
144    64     
0      16     
-48    48     
96     -48    
-80    48     
-32    32     
-96    96     
160    240    
-32    -32    
48     16     
192    128    
-64    64     
-16    16     
176    -48    
-48    0      
96     224    
-96    -16    
64     32     
32     -64    
80     0      
48     -16    
64     80     
112    80     
32     32     
48     -96    
96     96     
240    16     
-192   -80    
48     80     
-64    48     
-16    -16    
-64    -176   
208    96     
-80    0      
16     -96    
32     80     
-192   -640   
192    80     
-208   96     
160    160    
-64    96     
-16    128    
48     208    
224    160    
-192   -208   
64     128    
112    48     
48     80     
64     80     
128    -48    
0      64     
-112   -624   
128    64     
112    48     
-64    128    
-48    48     
112    144    
112    272    
-144   64     
224    64     
-96    -64    
-48    32     
-16    -32    
32     0      
80     -80    
128    208    
-112   -112   
48     144    
112    32     
-32    32     
64     80     
32     96     
16     112    
-48    112    
0      48     
176    48     
-80    -64    
208    -112   
32     96     
16     -128   
224    128    
-80    -288   
-16    80     
144    -624   
0      16     
256    192    
-192   192    
64     -64    
32     96     
16     0      
16     112    
160    128    
48     64     
32     48     
16     0      
0      80     
96     -304   
32     48     
-80    -64    
96     128    
48     32     
0      -80    
112    -16    
32     32     
48     144    
16     -16    
192    16     
192    0      
-16    112    
-16    -688   
-64    -16    
96     -144   
64     -64    
48     -272   
48     -16    
-240   0      
304    112    
-176   96     
160    144    
-48    -96    
-16    16     
224    240    
-160   -64    
80     128    
-144   -128   
176    0      
80     112    
48     48     
0      -336   
48     32     
64     208    
256    336    
-160   176    
80     80     
0      112    
-64    -176   
320    224    
0      -48    
64     80     
48     -112   
176    192    
-128   -112   
128    112    
112    -16    
-16    32     
-352   -464   
400    -864   
80     -256   
224    -368   
-224   -1520  
384    176    
-208   -128   
80     352    
-128   -768   
-48    -272   
192    -1936  
-16    -176   
272    144    
-112   64     
144    -384   
-64    -16    
144    -272   
304    160    
-64    32     
-32    80     
-1424  -128   
512    -32    
144    -48    
144    0      
-96    -112   
16     -976   
160    48     
32     48     
-112   -192   
96     -48    
-96    64     
-128   -448   
16     -224   
400    416    
-224   320    
-240   224    
176    -96    
-256   -112   
-96    -720   
336    -704   
288    -496   
240    304    
128    -2256  
96     -144   
0      -128   
-32    -64    
112    -480   
16     272    
-16    -112   
64     -144   
-128   176    
0      -144   
-304   -224   
160    64     
16     112    
-128   -496   
144    -128   
-48    -752   
64     0      
-32    -96    
16     96     
128    -16    
-32    48     
-96    -64    
-48    -96    
96     -16    
-144   -32    
-576   -208   
224    -16    
256    800    
-48    208    
-448   -544   
128    -544   
-80    128    
240    -416   
128    144    
16     80     
96     -32    
-176   -64    
160    -144   
-80    -128   
128    16     
-192   96     
16     -144   
-400   48     
128    -112   
80     80     
-16    32     
128    0      
16     -576   
64     160    
64     256    
-112   64     
-80    -32    
96     48     
-32    -16    
-128   -32    
224    -32    
112    -144   
-336   16     
160    -16    
-384   48     
48     -224   
-64    48     
80     -800   
224    96     
-224   400    
208    400    
144    448    
16     160    
-48    32     
-16    -96    
-112   -48    
16     144    
16     16     
32     -128   
-80    -80    
112    -160   
-256   0      
272    -144   
-16    80     
-192   144    
48     32     
-368   -112   
32     -80    
-32    80     
0      -48    
96     128    
144    176    
-592   368    
112    384    
-128   -16    
-64    -496   
-32    -128   
144    -288   
-576   80     
64     112    
-288   496    
768    1168   
-224   1488   
16     688    
-80    224    
-32    -448   
160    -368   
-544   -224   
-688   -112   
-64    240    
-80    -160   
-32    -64    
-656   -256   
448    608    
-544   -976   
-352   -112   
48     208    
-464   16     
144    -96    
-160   0      
-48    -1056  
400    -160   
-16    816    
-576   -176   
0      -96    
-304   -32    
144    288    
-96    144    
-192   32     
16     336    
-464   80     
-48    320    
-416   -384   
-224   -384   
-656   640    
-160   256    
-80    -96    
208    -288   
16     -176   
112    176    
-112   -48    
-16    0      
48     48     
-80    384    
112    192    
-144   -64    
-32    16     
-352   -48    
-224   -16    
-128   96     
-48    336    
-80    -48    
-16    256    
-16    -240   
-48    -16    
96     -16    
64     256    
-192   144    
-16    112    
128    32     
176    48     
-288   -176   
192    -544   
0      -208   
272    384    
-96    144    
64     -64    
96     48     
-16    240    
256    352    
-224   80     
272    -144   
-176   128    
192    112    
-176   48     
-144   0      
80     208    
0      144    
-64    48     
-224   -64    
80     0      
-400   -368   
416    32     
304    80     
-112   96     
-144   -16    
-128   -176   
144    0      
-336   -48    
448    -224   
-464   320    
416    -96    
-336   96     
288    128    
-240   -64    
80     112    
-96    -112   
-64    -16    
-112   -32    
208    272    
-112   48     
160    80     
0      -16    
272    144    
-192   144    
-48    128    
-112   64     
-64    176    
32     64     
-256   -32    
-16    96     
-272   -160   
0      -32    
-512   0      
80     80     
32     64     
-48    16     
48     -64    
-160   -80    
-96    -64    
32     32     
48     80     
16     16     
64     112    
0      48     
0      96     
-224   -16    
0      160    
96     96     
-64    128    
32     96     
160    -16    
64     -64    
96     -16    
48     80     
16     16     
112    32     
-16    32     
-80    112    
-64    -128   
-272   -160   
32     -256   
-48    192    
128    32     
96     96     
-80    48     
112    96     
-96    0      
160    64     
-160   16     
160    304    
80     -80    
-192   -192   
112    176    
96     176    
-128   224    
80     128    
112    48     
-16    0      
-80    32     
-112   -176   
272    -176   
-96    192    
112    96     
-48    -16    
-64    -80    
160    112    
-176   -64    
0      80     
-32    48     
32     48     
-176   -16    
320    32     
-160   96     
-80    -80    
32     -112   
192    16     
-128   144    
16     96     
48     16     
-16    -32    
32     0      
-64    -48    
32     96     
-176   32     
128    112    
-80    -48    
48     -64    
192    96     
-64    144    
16     80     
112    96     
-32    64     
32     80     
32     48     
-64    16     
96     144    
-80    80     
16     128    
-64    -16    
240    176    
-112   112    
16     144    
64     32     
192    32     
-48    -48    
32     48     
16     -16    
-112   112    
80     80     
-144   112    
32     64     
-16    16     
80     80     
-16    -272   
272    32     
-224   144    
-32    64     
0      0      
320    112    
96     240    
-272   -64    
208    128    
0      32     
-16    32     
-16    -64    
-144   -144   
320    -464   
128    -128   
-304   160    
0      -128   
-272   -384   
96     -112   
-240   -208   
128    48     
48     32     
-48    -96    
-64    -80    
256    192    
-256   -192   
368    32     
144    256    
-48    80     
-48    192    
112    112    
0      -192   
-208   352    
176    352    
-48    80     
32     32     
416    608    
0      448    
-48    144    
-64    112    
64     160    
-32    -32    
0      112    
-16    -16    
-48    -176   
-64    -144   
80     -768   
-272   -272   
48     -896   
-64    160    
128    240    
-64    400    
-64    336    
160    -64    
-208   -176   
128    -64    
-48    192    
64     0      
-80    -80    
-32    -240   
96     80     
-64    -16    
-112   -272   
-64    64     
224    176    
-16    -704   
16     64     
96     -336   
-16    240    
64     32     
64     -176   
-128   16     
80     256    
-160   -176   
192    -16    
-128   288    
304    -304   
-64    -64    
160    128    
-80    96     
-112   -96    
144    -112   
32     -432   
368    512    
208    -16    
0      -240   
-96    128    
352    80     
-16    112    
128    48     
32     -16    
320    128    
0      368    
-128   -1376  
96     -432   
96     -704   
96     -32    
272    192    
176    368    
-16    112    
208    112    
112    48     
-80    -224   
-144   -48    
288    -304   
80     128    
-48    -64    
144    64     
0      -176   
112    240    
-32    -192   
192    240    
-48    144    
96     304    
352    464    
-416   32     
128    -288   
0      -304   
112    560    
-48    -64    
96     0      
0      80     
240    32     
-112   -80    
64     240    
96     -208   
-32    64     
80     -64    
32     -192   
64     80     
112    -96    
-32    128    
-96    -224   
-32    -2160  
192    -528   
-32    -1232  
128    -384   
64     96     
320    96     
-352   256    
304    -224   
-288   -208   
144    80     
64     -96    
48     16     
48     -560   
16     64     
-1296  -16    
64     -400   
80     0      
272    0      
-32    320    
160    0      
384    608    
-336   416    
-80    -416   
96     -464   
32     -80    
80     -352   
128    240    
32     -16    
-128   -464   
-112   -48    
-96    -32    
192    96     
-96    -688   
368    416    
-96    -304   
32     -544   
176    144    
48     528    
64     -32    
64     144    
-32    96     
-32    256    
0      -160   
-48    192    
-352   -80    
0      -192   
112    160    
48     -240   
288    256    
128    240    
-96    208    
240    -1056  
-112   64     
304    240    
-32    -64    
-16    -96    
32     -128   
-48    224    
-64    -352   
-304   -304   
144    160    
-1712  64     
-192   -928   
32     -304   
176    -80    
-256   48     
208    -64    
16     144    
208    96     
-208   352    
288    288    
0      -208   
-160   128    
32     -128   
-112   16     
208    -16    
-112   208    
48     -48    
96     -112   
80     -288   
112    208    
112    -224   
32     80     
176    -848   
-96    16     
-48    -64    
0      -64    
-96    -48    
128    -160   
-144   -48    
272    96     
-192   -176   
160    -64    
-576   128    
-16    128    
48     64     
256    336    
-144   400    
16     -592   
0      -112   
0      112    
-192   -64    
288    -64    
-64    160    
32     0      
-32    -32    
-64    48     
160    -16    
-208   128    
256    -128   
-80    144    
-48    80     
256    -64    
-144   -400   
144    -144   
-144   0      
-16    144    
-304   416    
32     112    
-224   -112   
48     16     
112    64     
0      -80    
80     -16    
16     -192   
-80    -128   
208    -32    
96     160    
448    -16    
-96    128    
208    80     
-80    -48    
160    64     
-96    -144   
-240   -48    
96     32     
-80    192    
-80    -112   
-352   -96    
576    -176   
-96    48     
-1104  -128   
64     0      
0      160    
-176   112    
-176   96     
-896   160    
-272   -256   
-144   -320   
-112   -144   
-96    32     
-160   -112   
64     -208   
-32    0      
-544   -240   
0      64     
-80    -192   
-48    16     
80     -16    
-512   -208   
32     368    
-400   48     
-272   16     
-80    64     
64     112    
0      -96    
-112   96     
-160   -176   
32     128    
-176   -80    
-112   16     
-64    -160   
16     0      
-16    64     
-112   16     
-48    160    
96     192    
-304   0      
-384   -80    
-80    -80    
-1456  -32    
80     0      
-144   -64    
192    48     
-96    16     
112    96     
-144   -48    
48     16     
48     64     
-80    -224   
-32    64     
160    32     
-320   64     
96     80     
-48    48     
-336   64     
32     176    
-192   -16    
-96    -16    
-16    -80    
32     48     
-32    -64    
-128   112    
176    64     
-160   48     
112    64     
-192   0      
0      96     
16     64     
-80    -384   
-112   -112   
16     96     
-960   -112   
16     80     
288    160    
-224   304    
32     176    
-96    -16    
32     -80    
-272   -160   
-48    -176   
-144   -96    
48     48     
-80    144    
-144   96     
-160   -32    
-160   80     
-288   -128   
208    208    
-48    16     
-48    96     
64     32     
-192   16     
64     96     
-16    -16    
64     112    
-48    64     
16     80     
-16    192    
32     144    
-272   0      
16     80     
16     96     
64     112    
-720   192    
-112   80     
-64    -32    
-80    -112   
128    16     
-64    48     
-16    -16    
96     -128   
96     -96    
-176   -128   
64     -272   
-192   -208   
256    16     
-352   0      
224    208    
-160   320    
-48    128    
64     144    
80     48     
-16    -80    
160    192    
-208   256    
-64    128    
-144   -48    
208    80     
160    240    
-224   16     
240    -352   
-288   -144   
192    240    
48     192    
-96    48     
224    176    
-160   -432   
368    528    
-192   208    
80     -384   
80     720    
112    -320   
-48    96     
32     -144   
-128   448    
256    272    
-192   112    
112    368    
32     464    
-64    -112   
48     -96    
32     208    
-32    -16    
-96    -208   
416    192    
16     -64    
-32    144    
160    80     
112    608    
-176   -80    
96     -32    
-128   0      
-64    -48    
160    32     
-32    208    
144    192    
-64    112    
80     416    
16     128    
96     -192   
0      80     
32     32     
16     -128   
256    272    
-240   -112   
64     176    
-304   -304   
288    -272   
144    592    
16     384    
-80    -16    
48     160    
96     -32    
-48    368    
32     576    
-176   -32    
80     -16    
16     144    
-144   640    
96     -1248  
32     -192   
-112   384    
-192   80     
80     -112   
-32    -176   
288    -80    
0      -240   
144    368    
112    496    
-336   -208   
32     0      
-16    528    
-192   -16    
-176   -96    
-48    -560   
48     -1792  
-80    -176   
-400   -144   
112    0      
160    -144   
-112   832    
96     -480   
-176   -112   
144    112    
64     -576   
-16    544    
-176   -224   
96     64     
48     928    
-480   -352   
32     -576   
-96    544    
144    176    
-112   16     
-16    144    
0      -32    
80     80     
-16    80     
16     96     
96     48     
-48    80     
64     96     
-128   -176   
208    -112   
160    432    
-128   -96    
80     112    
32     0      
-208   224    
160    32     
-64    64     
-80    128    
0      -240   
240    368    
-32    160    
-256   -16    
-48    -768   
-32    320    
384    432    
-64    -368   
16     272    
0      -160   
0      -1120  
304    192    
-496   -656   
256    -96    
32     256    
0      336    
240    592    
-192   32     
-64    -208   
208    -160   
-32    -224   
16     -80    
160    112    
112    -208   
-144   80     
96     -384   
32     112    
80     96     
48     112    
64     32     
384    400    
-256   192    
-160   64     
48     192    
176    640    
-48    -256   
-112   -320   
128    144    
-64    0      
96     48     
0      -608   
64     0      
192    -720   
32     -32    
48     -48    
112    80     
-240   -480   
80     -32    
96     0      
16     112    
176    192    
112    80     
64     160    
-16    -272   
-48    -128   
176    -976   
16     96     
-48    -1488  
96     96     
272    176    
-64    112    
48     112    
400    368    
-176   80     
352    304    
-368   368    
48     64     
-32    32     
112    -144   
176    144    
-64    -352   
144    144    
0      -144   
96     112    
160    208    
-80    96     
-32    32     
112    96     
208    96     
-176   32     
16     128    
80     -112   
208    192    
-160   -176   
96     96     
-208   80     
304    48     
-16    32     
0      0      
0      -960   
80     64     
-32    -80    
256    -960   
-48    160    
176    32     
-192   -2144  
160    -32    
-16    304    
0      -96    
144    80     
144    -48    
0      128    
128    -32    
-272   -2192  
80     48     
-48    -416   
64     0      
-32    -32    
-112   16     
160    32     
32     -192   
-64    -64    
272    -592   
48     -208   
48     -720   
208    -288   
96     144    
-48    64     
-144   -432   
64     128    
96     80     
-160   64     
-272   -96    
80     -112   
-96    -176   
368    -416   
-160   -544   
96     32     
-128   192    
-208   -368   
32     -16    
96     592    
176    -48    
80     64     
-320   176    
-272   -208   
64     -208   
-144   -112   
64     32     
-560   -32    
80     112    
-64    -160   
112    -208   
160    -208   
-96    -352   
128    -144   
64     -1296  
-80    128    
160    -80    
-352   -144   
64     -224   
144    -32    
-176   112    
176    128    
176    256    
-176   112    
-32    224    
144    80     
192    192    
-80    144    
-32    -208   
-32    -448   
-16    -64    
-80    -80    
-208   -144   
368    -80    
64     -112   
128    16     
-32    0      
-112   -48    
48     -336   
64     80     
176    0      
-16    -64    
160    -64    
160    96     
32     -880   
64     16     
176    224    
64     160    
80     224    
96     -48    
48     80     
-176   -48    
32     -16    
-112   -80    
-192   64     
80     -48    
-464   -48    
-16    32     
64     80     
80     -416   
-32    -64    
192    -352   
-208   96     
-96    32     
-192   -128   
-176   -112   
176    32     
-304   16     
256    128    
-224   32     
112    -32    
-560   16     
192    -80    
80     112    
-144   -80    
208    80     
-128   -256   
160    -176   
-112   96     
128    0      
-48    96     
-176   -48    
240    144    
-80    -128   
-16    48     
-96    -16    
-288   32     
112    32     
-144   240    
160    -96    
16     0      
16     -720   
256    32     
-160   -16    
208    0      
-128   -16    
144    -64    
-336   -16    
16     240    
32     240    
-112   -208   
-128   -48    
176    -192   
-48    -144   
272    -64    
-240   400    
-80    352    
-208   240    
64     -48    
-656   352    
-208   -16    
96     -176   
-48    336    
32     272    
32     128    
64     -48    
-80    -144   
16     -32    
-16    544    
-48    128    
48     -80    
-64    240    
-96    -384   
48     -32    
-784   192    
0      -80    
-448   128    
-16    16     
80     352    
192    0      
-352   -288   
-48    -64    
80     -48    
-176   -144   
80     -240   
-144   -320   
256    176    
-64    80     
-16    -80    
-176   0      
-16    -304   
320    304    
-272   48     
-1872  -176   
-144   32     
-176   -208   
32     112    
0      -112   
-64    32     
96     -192   
80     32     
128    496    
-400   -624   
112    -48    
16     240    
-32    -16    
-96    128    
-64    -400   
-96    32     
-48    128    
-144   -544   
256    224    
112    496    
-48    64     
0      -144   
48     -320   
-32    -176   
-48    0      
208    0      
0      464    
48     352    
-560   -176   
-112   -272   
-352   16     
112    240    
-768   16     
64     208    
-96    32     
224    224    
-144   96     
-128   176    
-240   -256   
-112   -560   
-256   -112   
16     0      
-64    160    
-144   192    
-64    144    
-208   -64    
-112   80     
-144   -16    
-160   80     
-240   -160   
-256   -144   
-160   80     
-304   0      
304    464    
-496   304    
-64    -512   
80     -224   
272    1424   
112    176    
-352   -704   
-128   -608   
176    608    
-288   128    
-160   32     
224    -400   
208    176    
-48    176    
-160   -160   
-16    -1088  
208    624    
-256   256    
160    -304   
48     16     
-64    -144   
-160   192    
-208   48     
-432   208    
32     -832   
128    160    
-336   208    
-80    -256   
-16    176    
-32    0      
-96    336    
80     144    
-32    -64    
-64    -224   
-32    176    
-32    272    
-160   -80    
-144   -80    
64     64     
-336   -384   
-80    0      
48     -96    
-64    0      
192    256    
-32    -128   
32     80     
16     144    
128    -48    
128    384    
-48    -32    
288    160    
-464   -240   
192    -64    
240    192    
-176   48     
288    336    
-160   560    
144    80     
48     144    
0      592    
-16    -112   
-64    -160   
240    368    
-96    160    
112    -96    
-16    336    
64     -256   
-96    -160   
64     384    
-288   -48    
32     192    
32     -272   
32     -16    
128    336    
-144   400    
240    -16    
-224   48     
0      -192   
64     272    
48     512    
-160   -96    
112    -160   
-48    32     
16     176    
48     80     
-32    -16    
176    32     
-128   -16    
32     -128   
48     -16    
96     -16    
160    0      
-112   32     
304    80     
-16    272    
96     80     
-64    80     
32     32     
192    80     
-192   32     
-80    -16    
144    112    
64     112    
-192   -80    
-32    16     
160    -48    
16     16     
32     128    
-112   16     
0      48     
-16    96     
-32    160    
-96    240    
-144   -1008  
192    128    
-64    0      
-96    80     
288    240    
-64    160    
-112   96     
-16    80     
-16    80     
128    224    
112    192    
-160   64     
-32    64     
224    96     
-272   -240   
112    -1856  
-32    80     
80     64     
-32    144    
32     80     
-192   -240   
64     -160   
208    64     
-176   96     
208    64     
48     -96    
112    112    
32     -16    
112    48     
0      32     
80     -64    
160    80     
0      64     
80     112    
48     0      
32     80     
64     32     
-16    -64    
96     -336   
48     -16    
336    448    
-224   336    
112    192    
-544   -160   
64     336    
80     -112   
-16    -80    
304    -2176  
144    464    
-320   48     
16     48     
144    96     
-48    256    
-48    112    
144    80     
-304   -336   
32     -160   
112    64     
80     256    
128    288    
-48    48     
160    352    
48     -480   
-48    0      
208    -144   
176    -48    
176    -272   
128    144    
128    48     
96     128    
-224   96     
160    16     
-32    128    
-64    -48    
48     32     
-144   -288   
-48    -80    
-48    -192   
144    128    
-16    -592   
-320   -640   
256    96     
64     336    
-352   144    
32     160    
-80    32     
96     160    
112    224    
16     -48    
96     32     
-96    -144   
32     96     
112    -368   
80     32     
48     -400   
48     96     
-240   -496   
240    -64    
-96    16     
400    32     
-96    160    
-32    144    
-16    128    
-48    -176   
-112   256    
224    -80    
-256   16     
464    -240   
-176   48     
400    -336   
-80    0      
112    80     
224    112    
32     64     
144    80     
144    16     
-112   -512   
112    256    
-176   32     
80     0      
48     -320   
176    0      
144    0      
-32    64     
80     -16    
16     -144   
48     80     
128    240    
-224   0      
208    48     
-160   160    
128    -32    
16     160    
-16    -192   
208    80     
32     -176   
128    32     
144    -112   
-32    176    
80     96     
176    144    
16     32     
128    -1264  
-144   16     
-16    -640   
16     -192   
0      -112   
0      -416   
96     0      
112    -1168  
-32    -256   
224    64     
160    -80    
96     128    
-16    -96    
16     -720   
-32    -224   
96     -64    
128    176    
-96    -112   
112    32     
-64    -128   
48     -576   
-16    256    
176    -32    
-48    -416   
32     -480   
160    -32    
240    400    
-256   -144   
160    -192   
-112   128    
-144   -256   
64     32     
-32    -32    
-32    -288   
-304   -144   
128    -144   
32     0      
64     -64    
48     -32    
64     -416   
32     -64    
48     -368   
-16    -336   
16     -352   
-32    -208   
-64    -96    
-64    512    
-160   -144   
-128   -352   
-224   160    
-144   48     
16     -464   
16     -112   
112    -480   
-32    0      
352    -32    
-192   -1024  
192    224    
32     64     
-32    96     
64     -176   
144    -64    
-32    208    
96     -144   
-128   64     
144    16     
-720   64     
192    -176   
-48    80     
-128   -16    
16     48     
-48    -128   
16     -112   
16     16     
64     256    
-64    -240   
0      112    
128    416    
-160   192    
-464   0      
32     0      
-384   -48    
48     -48    
-96    32     
96     -96    
-144   -80    
208    -160   
0      96     
160    -1568  
-32    80     
16     32     
48     -144   
-80    -16    
16     -32    
-256   -112   
48     80     
-240   -64    
224    112    
-864   128    
32     -320   
32     -112   
96     -32    
80     64     
-224   -160   
144    160    
-352   128    
208    -368   
-896   -432   
-128   80     
0      -96    
-208   -176   
-176   -48    
-96    -128   
16     480    
-144   0      
-192   352    
240    -512   
16     -496   
448    -176   
-240   64     
-336   48     
368    144    
-352   608    
-48    -48    
-464   -512   
480    64     
-576   240    
144    -464   
-160   32     
112    -336   
288    -336   
224    240    
-144   208    
80     -128   
-416   304    
-464   160    
48     0      
208    -112   
48     320    
-144   -144   
-32    -320   
256    416    
-48    32     
144    -432   
32     176    
80     224    
-128   464    
-144   336    
320    -224   
-336   32     
176    272    
-1056  -416   
-400   -160   
-1488  0      
48     224    
-224   -144   
80     -448   
208    240    
0      -80    
144    -128   
0      -96    
48     80     
544    736    
-480   80     
160    -496   
272    384    
-608   -16    
208    112    
-784   -256   
-192   -272   
160    208    
-80    -208   
-48    -496   
-80    -272   
48     -240   
48     256    
80     512    
64     -80    
-176   -224   
-160   -432   
-48    -32    
64     -176   
-208   -64    
80     96     
-80    48     
-512   -304   
-144   -208   
160    -16    
-112   80     
-48    0      
192    64     
-256   144    
96     256    
-160   0      
32     -48    
-256   -320   
16     -64    
144    144    
32     -16    
-176   16     
-224   -32    
-320   -112   
-176   -176   
-176   -16    
272    -16    
64     80     
0      240    
144    256    
-16    112    
-240   48     
16     -32    
-80    -64    
-208   -32    
-336   -160   
-16    80     
-144   352    
48     176    
-1328  -48    
-32    80     
-80    -128   
48     16     
-128   -16    
112    -16    
64     -16    
128    16     
32     -16    
0      -256   
32     -80    
32     -16    
-80    0      
96     -96    
32     -16    
-576   -32    
-144   80     
-48    -16    
160    240    
-160   112    
256    32     
-160   96     
128    16     
-64    528    
0      112    
-368   -192   
448    -80    
64     224    
-304   192    
80     -112   
96     -96    
64     96     
32     0      
-112   48     
32     128    
-48    64     
-48    16     
48     32     
-160   64     
96     48     
-16    32     
32     0      
-64    -32    
-112   -48    
32     96     
-176   -16    
64     48     
-16    32     
-112   -48    
32     16     
64     32     
0      -16    
96     112    
0      80     
48     64     
-128   -64    
32     80     
-16    80     
-176   336    
176    288    
-160   192    
80     80     
80     64     
-112   160    
528    208    
-224   -16    
-32    -144   
288    -224   
32     -48    
48     80     
-32    80     
-48    64     
48     112    
-112   160    
112    192    
-160   -16    
32     64     
112    304    
128    32     
112    48     
-32    0      
-80    -48    
-64    -64    
-16    16     
144    16     
-160   160    
272    208    
-208   64     
-128   -112   
176    112    
-48    48     
-144   -80    
16     16     
96     32     
-16    16     
-160   80     
128    80     
80     304    
-64    -96    
64     96     
80     80     
-144   16     
80     64     
-32    32     
-112   176    
96     -16    
-240   -80    
416    64     
112    432    
-176   64     
48     80     
64     80     
-128   64     
192    192    
-256   192    
48     64     
-192   16     
32     -112   
288    -256   
-48    176    
192    -16    
-32    128    
32     -80    
304    -16    
-48    304    
112    256    
-192   -160   
320    0      
-32    128    
-80    -112   
208    160    
-64    -16    
0      80     
0      96     
176    -576   
-384   64     
208    144    
112    320    
-336   64     
160    48     
112    112    
64     -32    
96     48     
16     80     
128    272    
-128   96     
224    176    
-128   32     
-176   112    
80     32     
96     112    
0      96     
-80    80     
80     368    
112    80     
-80    -128   
0      64     
80     -128   
288    48     
144    -128   
-64    224    
-176   -16    
176    144    
0      208    
32     -64    
-144   80     
112    -1248  
-32    96     
-16    0      
-48    32     
-128   416    
48     224    
-272   -256   
176    160    
-80    96     
-64    112    
64     -32    
-208   -144   
64     80     
-48    -288   
48     0      
32     -2736  
32     224    
16     16     
-80    -80    
208    80     
-64    128    
-48    320    
128    -448   
48     144    
272    400    
-128   48     
80     -112   
272    448    
-368   -528   
336    448    
-208   -448   
176    -432   
-32    144    
192    -48    
-160   -96    
0      320    
-48    16     
112    -144   
48     -112   
-160   -736   
128    672    
256    96     
-256   -128   
128    -192   
-240   -272   
288    16     
-32    48     
-128   -304   
32     32     
96     48     
80     80     
-64    -16    
192    80     
-80    64     
80     32     
16     112    
64     -208   
-64    -96    
144    48     
-80    224    
176    -368   
-160   -64    
160    -320   
-32    96     
32     160    
32     -32    
-80    32     
-32    -112   
48     -112   
32     -208   
400    96     
-192   -176   
256    240    
-32    -112   
32     112    
32     -112   
64     64     
0      -96    
32     64     
176    32     
288    416    
-32    576    
0      160    
64     16     
16     -64    
32     96     
0      -96    
32     -64    
-64    -144   
-16    432    
-96    16     
48     -16    
176    208    
144    144    
-80    48     
128    -1056  
128    48     
-32    -640   
208    -96    
-112   -192   
176    -384   
64     -16    
96     -944   
80     -128   
0      64     
128    -48    
0      160    
192    -80    
16     -1024  
208    -32    
-96    224    
304    400    
48     80     
224    416    
-96    144    
80     -336   
-32    256    
16     -704   
384    144    
-192   656    
48     -128   
192    -240   
-80    48     
288    -160   
80     288    
192    96     
-64    -32    
224    320    
-64    208    
-96    -208   
352    -96    
-160   224    
48     -320   
64     0      
64     -592   
64     -416   
0      -48    
464    -80    
-64    160    
-80    -800   
352    96     
304    176    
-160   80     
80     -96    
-1120  -384   
64     288    
144    320    
-208   80     
-32    -288   
0      0      
304    144    
-288   -1680  
96     32     
96     32     
32     -224   
-32    -320   
272    -80    
-224   -80    
208    -96    
80     -320   
48     -240   
256    112    
-96    -32    
-16    -192   
64     -16    
64     304    
16     -256   
96     352    
-192   -144   
-80    208    
0      -96    
-128   -192   
-96    -64    
80     -224   
-544   -384   
128    -320   
-496   -192   
144    -432   
-16    80     
48     32     
16     240    
96     -624   
-64    112    
-112   -176   
-48    -80    
-112   -48    
-16    -64    
-32    -48    
128    -224   
-432   -320   
368    -192   
-528   -144   
96     96     
-848   96     
0      -144   
304    64     
16     -80    
0      -16    
-128   -288   
512    -128   
-64    176    
320    -96    
-496   -112   
192    -256   
-400   -48    
64     32     
-112   -64    
80     -112   
-80    -64    
192    -272   
128    96     
-48    -320   
112    128    
-16    -528   
144    0      
-320   -96    
-48    -128   
-128   -112   
96     48     
-48    -96    
144    -64    
96     80     
112    -80    
96     -64    
192    -224   
176    144    
-80    -112   
64     160    
-48    48     
144    240    
32     -128   
-64    -48    
96     80     
160    32     
-192   0      
144    16     
32     -112   
48     -144   
-48    160    
0      -80    
96     48     
-640   -32    
224    176    
0      112    
-928   16     
16     80     
-224   32     
80     16     
-32    -16    
48     224    
144    -48    
-240   -96    
224    64     
272    160    
-448   192    
0      -176   
-176   -96    
-128   -48    
-336   48     
-160   -64    
-144   96     
16     0      
-256   -48    
-1056  -80    
-128   -16    
144    -112   
208    160    
-80    0      
-80    80     
-304   -224   
160    96     
-128   -176   
-96    -32    
112    64     
-16    48     
-32    -32    
-32    -16    
-32    32     
16     0      
96     96     
-208   96     
48     80     
-208   -96    
128    96     
-64    -16    
-144   -16    
32     64     
432    336    
-400   80     
-144   48     
16     48     
-112   -96    
176    32     
-320   -144   
80     48     
-592   -208   
160    16     
-288   16     
208    288    
96     64     
-16    64     
96     32     
-144   -80    
-96    -32    
-32    -80    
-48    48     
-96    112    
48     464    
-272   96     
-80    80     
-288   -48    
-16    0      
-208   -80    
-48    128    
192    176    
-304   32     
-80    -80    
80     48     
112    48     
-16    16     
-64    48     
128    64     
-128   0      
80     96     
-16    -48    
-368   -128   
320    -48    
-112   32     
-48    32     
-32    -32    
-96    64     
-48    64     
-16    32     
-32    64     
160    32     
32     144    
-192   0      
64     144    
48     240    
32     -16    
128    112    
16     48     
-240   -48    
0      112    
80     96     
-48    64     
48     0      
-128   64     
272    496    
-16    128    
-80    -32    
-48    32     
16     64     
-80    352    
64     192    
-208   -112   
128    -16    
-224   -128   
96     240    
32     48     
-80    80     
128    64     
-48    80     
-48    48     
-32    352    
112    0      
32     96     
96     48     
-208   -80    
288    32     
-240   16     
416    304    
32     16     
-96    0      
-64    -96    
80     16     
160    -160   
-64    -16    
-64    288    
-64    96     
-144   176    
16     192    
-64    80     
-160   16     
80     16     
-208   32     
208    176    
-96    -32    
0      224    
32     192    
-64    32     
0      144    
-48    48     
-64    -176   
-80    -80    
144    64     
-16    112    
-144   96     
-144   -192   
288    336    
176    640    
160    608    
128    432    
-224   176    
64     -80    
400    480    
-128   64     
48     -112   
160    176    
16     32     
48     64     
16     -96    
80     240    
80     -320   
-128   -320   
16     -16    
-64    144    
384    -96    
-112   480    
240    128    
-144   -32    
-64    -176   
-16    -256   
144    384    
-96    0      
32     112    
192    192    
-112   80     
80     -48    
32     -16    
-64    -64    
-16    -112   
32     80     
-64    -256   
48     32     
64     -112   
-144   -16    
-16    -112   
160    224    
-96    112    
176    0      
96     64     
-144   112    
112    16     
64     80     
-48    -80    
-96    -192   
144    160    
64     80     
-48    0      
32     64     
16     48     
176    144    
32     -16    
-64    0      
432    288    
-192   144    
208    192    
128    128    
-32    416    
176    176    
0      -912   
128    32     
-16    144    
176    112    
-16    -16    
-32    80     
176    272    
0      208    
-96    240    
160    240    
-128   -128   
128    112    
-16    16     
64     48     
96     112    
-160   -608   
80     288    
16     224    
144    112    
-176   80     
48     48     
96     64     
-112   48     
16     32     
-48    256    
64     -608   
128    -64    
-48    0      
-256   -432   
32     -16    
32     -368   
-32    144    
80     -304   
-176   -96    
96     -256   
272    352    
-128   -16    
-112   0      
16     96     
48     96     
80     112    
16     112    
128    112    
-48    -160   
160    48     
-112   -16    
240    400    
16     -448   
0      96     
16     160    
-16    -272   
96     112    
64     128    
176    -16    
-224   -192   
32     1040   
128    -160   
96     1168   
-192   -368   
272    320    
-48    80     
-96    16     
112    208    
-48    -304   
64     -1344  
176    240    
-64    16     
96     336    
-48    -64    
64     -48    
16     -112   
-64    -480   
-176   -48    
224    -112   
-128   48     
160    -464   
208    -48    
-32    -272   
80     144    
64     -48    
64     560    
224    368    
-80    192    
16     0      
144    -16    
-16    16     
272    128    
-192   208    
384    80     
128    176    
0      -80    
-208   224    
0      112    
224    176    
-224   -512   
112    144    
-80    16     
80     112    
80     32     
128    112    
-16    160    
-48    -272   
352    240    
-160   32     
-256   -208   
496    -304   
-256   256    
272    -352   
160    96     
112    -176   
320    48     
-304   16     
704    48     
-400   96     
432    -192   
-192   -816   
80     16     
0      192    
112    16     
16     16     
0      -96    
288    16     
48     -144   
32     32     
32     -144   
64     -1152  
272    80     
-48    96     
176    -64    
-688   -48    
48     -848   
-272   16     
48     -224   
176    0      
-176   -1296  
96     112    
96     -112   
128    -48    
128    160    
16     16     
240    -32    
96     192    
16     80     
16     80     
128    -80    
48     -352   
48     48     
96     -304   
-48    -144   
144    -784   
-144   -16    
-48    -1392  
16     16     
-16    -208   
-16    -144   
208    64     
-352   0      
-64    -80    
128    32     
-144   0      
-16    -80    
-1568  -32    
-80    -32    
256    192    
-128   -208   
144    -16    
96     -96    
32     -112   
32     -1104  
-16    112    
336    16     
-192   208    
240    112    
-112   -64    
64     -64    
0      -176   
-112   0      
176    32     
-144   -48    
32     -32    
64     0      
96     -384   
64     -32    
64     -2144  
-16    -528   
128    -80    
208    208    
-496   -144   
128    -96    
-128   -224   
32     16     
-112   64     
128    16     
-544   64     
-80    0      
-192   -208   
144    -240   
32     64     
16     -688   
-16    144    
96     64     
-176   -48    
-64    208    
128    -16    
-512   -416   
240    -64    
-128   16     
-112   32     
16     32     
-48    -144   
-784   -32    
112    -192   
96     96     
16     -160   
80     48     
128    -1104  
-32    0      
64     32     
0      -16    
-16    32     
48     -64    
-800   0      
160    -32    
-192   -32    
64     48     
112    160    
128    16     
48     32     
80     -160   
336    128    
-272   -272   
0      -128   
-176   96     
448    352    
-1008  -16    
64     -112   
208    -48    
-112   -96    
-32    64     
400    48     
-320   80     
48     -272   
208    48     
64     -288   
176    80     
-112   80     
112    64     
-208   -32    
336    80     
-400   48     
64     112    
0      -16    
-176   -272   
224    -208   
112    -48    
80     176    
-96    -176   
96     144    
-704   -112   
176    256    
32     240    
-1424  96     
-112   -48    
-96    -80    
-32    -16    
64     80     
-16    -48    
-32    -112   
48     48     
-784   -144   
224    304    
-176   64     
-64    64     
32     -48    
80     80     
-208   -128   
-352   -176   
176    -464   
240    -160   
-80    272    
-384   128    
-368   -32    
320    -80    
-352   -320   
-96    -560   
-128   48     
-144   64     
112    112    
-128   -192   
32     64     
192    112    
-176   176    
-48    192    
-48    96     
80     192    
-320   224    
-112   208    
96     80     
-16    96     
-32    -112   
304    32     
-144   128    
32     240    
48     160    
-80    -208   
368    -544   
0      -160   
128    -112   
-448   -288   
-112   -16    
-272   16     
-16    -128   
-464   -464   
-16    -336   
160    -32    
-64    0      
32     -208   
64     64     
-48    128    
32     192    
48     400    
32     -32    
-320   192    
-544   -192   
32     -384   
16     480    
-80    -48    
-272   -64    
-32    -48    
240    -480   
-48    224    
240    -432   
160    16     
-192   64     
208    48     
-96    256    
80     0      
144    320    
32     352    
-160   -80    
128    -16    
-128   16     
-48    -64    
-32    80     
80     16     
96     80     
-64    0      
32     80     
48     128    
-80    208    
48     80     
-144   16     
192    160    
-96    368    
64     -80    
-112   -208   
-112   -16    
-240   -144   
-32    -80    
-896   -256   
144    16     
-96    32     
64     48     
-160   256    
-112   16     
144    -96    
-32    -32    
64     -48    
-224   -96    
48     16     
-112   160    
-16    256    
288    96     
-96    800    
32     96     
-80    0      
128    -16    
272    112    
-304   96     
256    32     
96     112    
-32    -16    
0      96     
-32    64     
96     64     
-128   -16    
48     48     
-128   -16    
288    224    
-352   -32    
-96    368    
352    320    
-240   -144   
112    112    
0      112    
-16    224    
208    272    
-144   272    
48     128    
64     384    
-144   -256   
0      -512   
-144   32     
144    -176   
-208   -288   
96     80     
48     128    
-48    176    
0      160    
-96    288    
48     16     
-96    64     
-112   -48    
64     32     
-64    208    
-240   -208   
0      0      
-112   96     
-160   -160   
-160   16     
240    -448   
-352   -48    
304    176    
-224   512    
96     -1072  
16     -288   
240    624    
-128   112    
-64    80     
64     -144   
-16    64     
96     0      
176    48     
-64    48     
-32    480    
32     16     
-48    -80    
80     224    
-80    -32    
-64    -64    
64     192    
112    128    
-16    48     
-128   -128   
192    -128   
-80    -96    
16     48     
16     -32    
-16    -96    
64     64     
80     -16    
48     -64    
272    -240   
16     -112   
-192   -432   
112    -128   
-16    160    
-48    240    
-128   64     
32     112    
192    96     
-64    80     
336    336    
-448   112    
128    -64    
144    -16    
128    80     
0      256    
-176   128    
48     -64    
48     -128   
416    496    
-464   -144   
32     -64    
272    160    
-192   0      
176    176    
96     0      
48     -704   
240    128    
-144   0      
384    48     
224    240    
-256   128    
64     144    
-96    176    
-16    96     
160    192    
48     96     
96     144    
-80    -48    
-32    -160   
224    -80    
-144   -496   
112    80     
-80    16     
32     16     
128    160    
-32    304    
-32    288    
64     336    
48     -32    
144    80     
192    -128   
-208   -192   
64     -32    
64     -272   
-16    -80    
32     -432   
-16    -16    
192    -192   
64     16     
-176   176    
144    128    
-288   -64    
96     16     
176    -176   
144    -48    
-16    -16    
32     64     
-48    -112   
-80    -144   
-16    -208   
192    0      
0      32     
32     -224   
224    16     
-32    -48    
208    -64    
64     352    
432    160    
-192   -16    
224    80     
112    0      
160    112    
64     96     
-48    -336   
-96    -128   
-80    -96    
160    240    
-208   -224   
-32    128    
96     -880   
32     208    
144    96     
-144   112    
128    112    
-80    128    
-16    -48    
192    0      
112    256    
-96    -160   
-48    96     
128    -192   
-160   128    
112    -192   
-96    80     
128    -448   
-128   0      
-16    96     
400    480    
-400   144    
80     96     
176    64     
64     -16    
80     80     
16     96     
144    192    
-240   -112   
240    304    
208    -176   
-352   -176   
352    -192   
16     160    
176    -16    
-80    144    
48     96     
192    96     
48     112    
16     -192   
160    160    
-144   -304   
-32    32     
48     -176   
80     96     
144    0      
0      304    
176    -160   
-80    144    
-48    -112   
32     144    
160    32     
-48    -144   
80     -304   
80     -304   
16     -480   
80     -224   
80     -48    
-80    -272   
176    0      
320    64     
-336   384    
-32    -416   
32     -160   
112    16     
-32    -336   
48     64     
288    -192   
-32    -336   
192    -80    
-208   -432   
96     -112   
112    -1008  
16     32     
144    96     
-96    -48    
48     80     
64     192    
64     -128   
80     144    
208    -48    
-160   32     
-320   -80    
0      -432   
48     -48    
-64    16     
112    144    
96     -544   
-128   -288   
144    -1376  
-144   -176   
144    -224   
16     48     
16     -48    
128    96     
-112   -176   
16     80     
-144   80     
80     -192   
32     -144   
96     -32    
-176   -112   
336    32     
592    544    
-624   0      
336    176    
48     64     
32     144    
192    96     
-208   -144   
0      -224   
208    96     
-176   16     
48     32     
-1088  48     
96     -48    
96     -160   
64     -112   
224    -32    
96     -272   
128    32     
144    -1376  
224    -96    
16     16     
32     80     
112    -64    
-32    -320   
-64    -256   
48     -320   
-912   -192   
-112   -432   
-96    -208   
-272   -848   
96     -384   
-96    -768   
-32    -16    
144    -1024  
-64    32     
112    48     
80     0      
-224   -128   
96     256    
-192   0      
16     -128   
-208   -64    
304    720    
-624   -320   
-16    -848   
224    -96    
144    48     
-368   -624   
192    -528   
224    480    
-80    -208   
16     -128   
64     -48    
-192   -48    
-160   -528   
240    48     
-400   48     
400    -288   
-416   352    
304    -240   
-80    -80    
416    16     
-224   128    
624    80     
-560   80     
528    -1728  
64     192    
-400   128    
256    -304   
-96    -80    
208    288    
-176   -32    
-16    -208   
-480   224    
176    400    
-96    -192   
-16    -352   
48     -64    
128    368    
-288   288    
-256   -432   
160    64     
-112   256    
-112   -272   
-128   144    
80     208    
-32    128    
160    272    
-240   -192   
240    -96    
-448   -32    
0      -48    
144    192    
-304   -416   
160    144    
-240   16     
112    48     
48     80     
-112   -16    
32     16     
-32    0      
-32    96     
-128   -528   
176    -320   
176    -112   
48     144    
-800   464    
112    368    
-192   -64    
144    144    
32     32     
-128   64     
128    176    
-1328  272    
96     240    
112    304    
-320   -16    
16     -528   
-160   -240   
-80    -208   
0      -176   
-192   -448   
96     -48    
-96    112    
224    32     
-256   48     
-16    -288   
0      -240   
80     480    
-80    176    
-432   -16    
-16    48     
-16    0      
48     32     
-240   -48    
112    80     
32     16     
48     128    
-32    64     
-80    -64    
16     64     
-176   16     
-160   96     
112    224    
-48    176    
-592   528    
16     16     
-960   -496   
368    784    
-240   288    
-16    -640   
128    -224   
16     624    
48     -128   
-64    304    
-144   160    
208    16     
-336   -432   
-32    256    
-96    32     
32     32     
-144   496    
-192   -80    
-64    80     
-208   -128   
160    16     
-144   16     
208    -240   
112    208    
80     96     
112    32     
-192   224    
-48    64     
-96    -352   
208    -176   
-144   0      
32     224    
-32    -192   
-32    -272   
112    -272   
-48    256    
0      -32    
-112   48     
48     -16    
-112   -16    
-16    48     
-384   -400   
208    -32    
64     32     
-48    64     
112    0      
-48    208    
64     64     
-144   -176   
-112   -304   
32     -144   
64     96     
-192   -32    
144    80     
-80    64     
112    144    
-80    80     
80     128    
48     -32    
-224   -64    
112    -128   
-288   80     
-48    80     
16     32     
-96    16     
224    -128   
16     176    
-32    112    
32     176    
-64    0      
96     64     
-48    -48    
-96    80     
112    0      
-240   112    
-16    32     
-48    80     
-32    -320   
16     -112   
-352   16     
-240   -192   
368    64     
-400   -128   
256    -48    
192    112    
48     112    
-16    0      
48     160    
-112   -64    
48     144    
-32    0      
-176   -560   
-160   -208   
256    128    
-368   32     
320    176    
-96    16     
-80    32     
80     96     
-16    -64    
80     -80    
176    160    
-80    -32    
160    32     
-240   96     
-32    112    
-128   112    
-144   16     
320    192    
-64    16     
-176   64     
112    240    
96     224    
32     176    
-80    -48    
80     32     
112    16     
112    -16    
32     -192   
80     -160   
-16    -240   
288    80     
-48    32     
0      160    
-96    0      
80     -48    
160    -144   
80     -80    
176    0      
0      144    
-16    48     
-48    -224   
48     -32    
-224   96     
32     144    
-336   112    
240    64     
-272   -16    
176    128    
-96    16     
-112   0      
-112   16     
64     80     
-32    80     
-64    144    
0      112    
-112   -64    
48     64     
48     -16    
-160   96     
-192   -272   
-16    80     
64     112    
-32    144    
-112   80     
80     -48    
-16    -48    
144    16     
112    160    
160    192    
-144   64     
-144   -48    
192    -16    
304    128    
64     160    
-112   32     
208    256    
-160   48     
16     128    
160    -16    
-64    64     
96     160    
48     48     
16     48     
-32    48     
32     80     
0      -80    
0      48     
80     -64    
-176   32     
64     -352   
48     -512   
64     160    
-64    -1632  
144    64     
64     32     
32     96     
176    256    
-224   80     
80     64     
48     -32    
-16    -80    
32     48     
-128   -16    
96     48     
80     -112   
48     -336   
176    -64    
-96    -336   
256    336    
64     208    
-16    192    
48     128    
192    128    
32     32     
-32    -112   
144    -256   
256    144    
-144   256    
64     96     
96     96     
16     -96    
80     80     
80     -272   
32     32     
-80    -704   
336    304    
0      240    
-64    80     
-96    16     
32     80     
-112   -256   
-96    160    
320    112    
-48    -32    
96     144    
-80    -352   
64     272    
112    -224   
160    208    
-96    -272   
80     336    
32     80     
-48    16     
80     -288   
48     272    
80     192    
-16    96     
112    64     
-176   -128   
-16    -496   
-48    -336   
48     160    
64     128    
-16    64     
80     -176   
80     64     
-128   -2592  
160    256    
128    160    
0      192    
-48    -64    
192    -240   
-176   96     
96     -816   
176    448    
16     112    
0      80     
256    1008   
-160   -384   
-32    -128   
48     -112   
-16    -80    
-32    48     
80     176    
-16    448    
144    -496   
-80    384    
320    448    
-384   -288   
64     -496   
128    256    
32     -64    
128    0      
-208   -272   
368    -256   
-192   512    
128    -272   
336    112    
-96    32     
592    176    
-112   432    
48     -128   
112    160    
-48    -16    
304    176    
-160   128    
-32    32     
-112   -272   
-32    -96    
32     -128   
-96    16     
176    -256   
-96    -208   
608    528    
80     -688   
-48    512    
-16    -176   
112    -1008  
-96    -192   
96     -224   
48     -432   
80     -304   
-16    128    
192    192    
32     272    
128    48     
-224   16     
-32    -704   
-48    -16    
208    -400   
-48    -80    
-32    144    
272    -464   
-272   -512   
64     -768   
384    -464   
-320   -112   
336    208    
-96    896    
-48    -816   
32     -592   
-48    128    
80     -112   
48     432    
-32    192    
176    112    
-640   -448   
464    224    
-288   400    
80     -112   
32     -432   
-32    32     
368    -320   
-16    -400   
208    176    
176    -160   
48     48     
-128   368    
64     -368   
256    -240   
32     160    
-32    -192   
272    -128   
-640   80     
-48    64     
320    -400   
-208   -112   
224    -32    
-128   -224   
32     128    
80     32     
-96    64     
-32    -256   
208    96     
-144   -160   
128    -16    
-80    192    
128    1216   
-896   -1200  
-80    -448   
64     576    
-304   -928   
288    -48    
-160   -32    
256    208    
-48    -640   
-208   -448   
544    -288   
-272   560    
208    144    
16     16     
-48    32     
192    -80    
-224   -128   
176    16     
-544   -576   
96     64     
-176   64     
208    -256   
-64    240    
64     -848   
64     64     
16     -224   
64     -320   
16     176    
-144   -64    
0      -16    
112    -16    
48     64     
64     32     
-160   0      
64     -80    
-16    32     
16     -640   
-16    -336   
-48    -320   
-144   -224   
336    816    
-32    -224   
-176   -672   
96     -304   
128    -304   
-16    -432   
-96    288    
80     -96    
-288   -384   
256    -656   
-496   -240   
288    -208   
32     48     
48     -304   
48     128    
-480   -112   
-48    -144   
48     48     
32     0      
-48    112    
0      96     
-208   48     
112    -144   
-432   -16    
48     -208   
0      -16    
80     -48    
-96    64     
-32    -32    
64     16     
-224   208    
304    64     
-160   32     
80     48     
-48    320    
48     16     
-240   64     
128    16     
-96    0      
32     -64    
-48    32     
-880   -320   
-288   48     
160    -352   
-224   0      
-16    -32    
-128   32     
224    416    
-624   160    
-240   128    
384    -208   
-256   -288   
320    -160   
-240   -48    
-224   64     
-160   272    
-416   -128   
-16    32     
-368   -32    
112    64     
-48    128    
16     -48    
-48    0      
-384   -80    
-32    -96    
-384   32     
-128   64     
64     32     
-96    -64    
-432   112    
288    400    
-288   192    
32     32     
-80    -128   
-192   -32    
144    48     
-448   -288   
16     -224   
-128   64     
-80    112    
80     96     
-128   -96    
-400   -112   
16     0      
160    -16    
208    -16    
-176   -80    
80     -336   
-128   112    
112    144    
256    720    
-16    960    
32     672    
32     -64    
-16    32     
-400   64     
-256   176    
-1104  -16    
-272   -192   
-144   -144   
-192   -96    
16     -96    
-48    80     
-128   0      
32     -160   
-32    -32    
176    128    
0      352    
-208   -32    
-144   -368   
0      -320   
-96    -288   
-112   -80    
128    80     
80     16     
-32    208    
-208   -640   
304    112    
-16    80     
-272   -48    
256    128    
288    -16    
-80    96     
-160   -80    
16     80     
176    80     
-160   64     
-112   -32    
224    64     
-2032  -112   
96     240    
-176   16     
-112   80     
48     96     
-96    -16    
240    208    
-448   48     
112    64     
32     -16    
144    80     
-144   0      
-112   96     
-240   -96    
-48    64     
-1376  -48    
208    112    
-160   160    
-32    96     
-80    0      
48     320    
224    16     
-32    96     
0      64     
-16    32     
16     0      
-128   -144   
176    176    
64     -48    
32     128    
-592   -16    
0      192    
0      -16    
-32    48     
16     48     
-32    64     
160    192    
-160   64     
0      16     
80     -112   
80     16     
-96    16     
16     64     
-80    0      
48     32     
-16    80     
32     48     
-144   0      
0      64     
32     -64    
-112   -64    
80     48     
-64    32     
64     80     
-48    -80    
32     320    
128    208    
-96    144    
-64    192    
272    96     
-160   32     
80     48     
-16    64     
176    64     
-16    176    
16     128    
0      352    
112    -16    
-176   64     
160    -240   
-80    -480   
-112   -528   
160    -112   
-80    -192   
16     64     
320    416    
-256   -192   
48     -192   
176    0      
-48    -128   
32     -240   
96     240    
-48    96     
64     80     
16     0      
192    288    
-160   -144   
16     -32    
-16    144    
48     192    
160    96     
96     832    
-32    -544   
0      624    
-144   240    
0      -464   
32     80     
-192   -240   
-144   128    
-32    416    
32     192    
-192   -192   
0      208    
-64    32     
144    16     
-80    144    
176    32     
16     160    
-32    80     
352    496    
16     -48    
-128   32     
-64    0      
96     96     
-64    -32    
112    160    
-48    48     
192    176    
48     432    
-160   -16    
416    -96    
-272   64     
-32    -48    
0      32     
64     288    
96     176    
-128   -176   
-112   288    
-128   -16    
-176   -128   
192    256    
-240   -96    
-48    -768   
-112   -64    
-528   -448   
368    -528   
-240   -208   
304    -192   
-32    -192   
112    128    
32     -352   
-160   -128   
112    80     
128    48     
48     112    
224    128    
-176   192    
-32    -480   
-288   48     
288    -688   
-96    64     
-208   -224   
-112   -240   
224    48     
-224   96     
96     -288   
48     -160   
96     288    
-96    -48    
336    64     
192    576    
208    432    
64     32     
176    48     
-208   -160   
224    32     
-48    -80    
176    400    
64     768    
160    -304   
32     -32    
-32    32     
208    -288   
64     32     
112    -64    
-96    256    
544    -64    
-16    -32    
16     80     
208    -672   
16     -288   
112    -544   
-80    -16    
272    80     
-288   208    
112    -256   
464    576    
-336   448    
0      -256   
-288   -64    
480    -160   
-96    64     
-32    -144   
224    128    
16     -480   
80     768    
32     -592   
32     576    
-400   -912   
304    1296   
-368   -16    
96     -544   
16     608    
-32    -192   
128    304    
144    -16    
96     -64    
-16    208    
-192   -416   
256    -48    
-176   144    
-48    -16    
80     48     
-96    -1120  
320    320    
48     336    
144    144    
96     0      
112    -48    
96     272    
0      -208   
-48    32     
144    -672   
112    272    
-112   320    
96     528    
-16    -752   
48     16     
112    -128   
16     96     
-64    -368   
-48    176    
-64    192    
128    192    
16     304    
224    304    
-272   -400   
128    -336   
112    48     
-48    -224   
64     352    
144    16     
-16    224    
48     -320   
128    48     
144    192    
-208   -1952  
-16    96     
208    240    
0      -848   
176    -96    
0      240    
-80    -144   
176    112    
-48    -224   
128    48     
288    224    
-128   32     
208    176    
-320   -320   
-32    48     
96     0      
-16    160    
-944   -32    
-80    -128   
272    -80    
-144   -656   
368    -32    
-336   -1744  
64     -112   
32     96     
64     32     
-16    -704   
-64    32     
176    -960   
-304   16     
96     16     
-16    48     
-800   -112   
224    144    
48     -96    
-64    -272   
64     -64    
48     -80    
112    -96    
208    -336   
-160   256    
16     -48    
-224   -16    
224    -176   
64     144    
-48    -144   
64     -176   
-272   -160   
64     -96    
80     64     
-96    -256   
64     0      
208    -208   
-144   -144   
32     -736   
16     -16    
0      32     
0      112    
48     16     
-48    -64    
-96    -272   
112    -112   
144    48     
-16    0      
-320   0      
128    32     
48     -80    
-64    -400   
64     -208   
-128   -224   
192    256    
32     400    
48     128    
0      -176   
80     16     
-16    16     
0      -96    
80     -240   
64     96     
-144   32     
-96    -48    
-112   32     
-16    -64    
48     -64    
-112   -320   
80     -160   
96     -1408  
-64    32     
160    -80    
16     -32    
144    208    
48     64     
128    112    
96     -128   
-208   16     
224    -16    
-352   112    
48     -48    
-32    160    
304    -80    
-32    144    
192    -208   
-80    32     
224    16     
-16    -16    
64     -48    
48     -144   
-80    -64    
96     -128   
-400   -128   
160    -144   
96     48     
80     -208   
-320   48     
176    -112   
-288   16     
48     -288   
208    352    
-144   176    
-192   -32    
64     -80    
112    192    
-176   -48    
-32    -112   
-160   96     
160    0      
-352   -64    
96     -144   
-64    256    
176    0      
64     240    
-112   -32    
176    -48    
-480   80     
224    -16    
-96    64     
32     -112   
160    48     
48     128    
32     112    
-144   -96    
0      0      
224    -96    
0      96     
224    -16    
96     96     
224    -320   
-1376  -160   
-112   -64    
-1008  -96    
16     32     
-16    96     
96     240    
-240   32     
-240   32     
208    -112   
-32    16     
-992   -224   
208    -112   
-96    -176   
160    48     
-64    -32    
-256   32     
-32    48     
-48    64     
-128   -32    
-528   -32    
-64    -128   
-208   -16    
32     96     
48     160    
-272   32     
-160   -144   
240    80     
80     -112   
-80    80     
16     32     
-16    -32    
-16    208    
-16    -32    
-80    0      
-208   -48    
32     80     
-640   -240   
32     16     
-608   480    
-112   304    
64     -192   
208    176    
64     -16    
48     240    
112    272    
-64    208    
-96    -32    
-64    64     
-144   16     
-160   32     
-32    224    
64     160    
-144   304    
-1680  -464   
400    -384   
-256   288    
-128   192    
-16    -192   
64     0      
-80    320    
-96    -32    
-48    16     
-16    64     
96     64     
-16    64     
-48    80     
-112   -96    
0      80     
-528   16     
-16    64     
0      192    
112    -464   
-160   256    
-208   -704   
160    288    
-96    96     
48     80     
112    208    
-48    -16    
-208   16     
-80    -160   
-192   128    
32     208    
-192   -48    
560    368    
-384   672    
112    -64    
-176   -128   
-80    -80    
-16    -160   
-16    -48    
32     128    
-16    0      
96     240    
-256   -80    
-64    -272   
0      144    
160    192    
-288   96     
80     304    
-1648  -144   
-160   16     
48     -256   
80     -144   
-16    -224   
-48    -176   
96     96     
240    352    
-160   192    
176    160    
-32    128    
32     32     
16     96     
16     48     
-208   16     
-384   -96    
-32    96     
128    16     
-48    48     
48     64     
-112   32     
16     32     
400    336    
-464   -16    
-32    -64    
-160   -288   
-80    -240   
160    0      
-112   -80    
0      16     
96     -32    
-160   384    
-80    -32    
208    16     
-112   80     
96     112    
-64    144    
-208   -176   
48     16     
-192   -400   
432    -224   
-112   64     
-128   112    
224    32     
-96    192    
320    112    
240    -48    
160    400    
-80    80     
-240   -272   
624    0      
-224   176    
-64    -304   
272    -208   
64     704    
128    -64    
-224   32     
208    256    
-160   -176   
128    -80    
48     160    
0      112    
224    544    
32     -48    
-320   -176   
96     48     
-304   176    
80     32     
-96    192    
-48    240    
-80    160    
-64    -416   
-48    -496   
480    400    
-192   176    
-48    -464   
160    192    
-16    272    
16     32     
16     272    
-288   -96    
32     576    
-144   96     
-128   32     
80     256    
0      800    
-144   384    
-64    -16    
-288   -176   
208    320    
-80    192    
160    656    
416    256    
-144   -176   
96     -352   
0      -336   
48     -176   
-320   -544   
288    -32    
144    192    
-304   48     
-288   -144   
160    -16    
-176   -544   
-80    -160   
208    64     
-96    160    
0      32     
-80    -224   
192    -144   
0      -32    
192    96     
16     -80    
144    80     
-48    96     
112    368    
112    48     
-176   -176   
80     -112   
112    -16    
368    272    
-240   176    
-144   304    
48     -160   
128    -224   
160    96     
48     160    
-192   80     
288    336    
-288   0      
176    144    
176    64     
-96    -336   
320    384    
176    -1920  
-16    176    
48     112    
64     -32    
16     -48    
80     80     
-144   -80    
144    -32    
-32    -64    
352    96     
48     0      
16     144    
112    80     
-64    -16    
208    96     
-176   -32    
48     128    
16     96     
64     80     
-96    -64    
64     128    
64     176    
32     80     
96     16     
16     112    
-96    -16    
192    16     
-224   32     
112    -16    
-240   -560   
288    -624   
32     128    
0      -96    
160    144    
-96    -16    
112    144    
0      16     
112    80     
-208   -32    
144    128    
-80    -32    
80     -112   
96     -48    
0      -256   
112    48     
112    -528   
32     0      
32     -1552  
112    64     
-32    16     
-16    96     
160    -16    
-112   96     
16     16     
160    112    
208    256    
-256   16     
48     96     
160    -144   
16     160    
112    -288   
0      80     
16     -208   
0      80     
160    -592   
0      80     
48     64     
-48    112    
-48    32     
208    144    
-160   -32    
-48    -144   
16     96     
32     -624   
288    192    
64     -144   
144    96     
-16    -368   
-32    -192   
-48    -816   
272    112    
-112   -16    
208    96     
-64    -48    
112    96     
64     -64    
-16    -688   
16     16     
0      0      
384    320    
-80    112    
-48    96     
80     -176   
0      96     
-96    -240   
64     -32    
-80    -64    
80     32     
80     32     
112    -96    
48     224    
128    32     
-160   48     
80     0      
0      192    
64     -112   
32     32     
80     48     
16     32     
16     112    
48     -32    
48     48     
64     -368   
-288   48     
160    -48    
-240   -512   
48     -96    
-32    -704   
112    -112   
-64    96     
272    -144   
-48    128    
96     -80    
-16    -128   
-16    -32    
80     -528   
48     160    
-256   -480   
288    32     
-1488  160    
-80    -32    
176    -80    
16     -32    
80     -224   
0      -992   
48     -112   
240    176    
-96    -208   
208    96     
-176   160    
32     -272   
80     272    
64     16     
-64    0      
-112   -96    
32     -112   
144    64     
-80    -176   
32     -128   
272    -240   
-16    80     
80     -1952  
0      -32    
32     128    
48     32     
80     -48    
192    80     
-176   -48    
272    -240   
-496   16     
96     -16    
-1248  -160   
96     -144   
208    -16    
-144   -48    
0      -240   
-16    -1184  
-64    -192   
64     -16    
32     112    
48     160    
-128   -144   
-96    96     
192    -64    
128    80     
112    32     
-240   -16    
224    96     
-16    -32    
80     32     
-48    0      
48     -352   
-48    -80    
-224   -656   
16     -112   
-80    -64    
208    624    
32     64     
192    64     
-160   224    
0      144    
32     64     
160    176    
-1296  352    
-64    -240   
96     80     
128    -48    
-112   96     
208    -784   
0      64     
-48    560    
-48    -128   
-160   48     
-80    -80    
-160   192    
-16    -288   
32     -368   
384    -128   
-416   -144   
224    48     
-64    0      
112    -240   
-16    -32    
112    -176   
-48    -32    
-64    128    
160    -208   
-80    512    
304    528    
-160   -128   
-144   -176   
-64    -96    
224    64     
-368   32     
192    -144   
-32    80     
48     -192   
32     128    
80     -128   
48     16     
-240   80     
16     -48    
-144   0      
-208   -32    
304    -112   
-16    160    
-64    272    
-64    192    
-112   -80    
48     -240   
-64    -48    
96     -176   
0      128    
80     -224   
-816   128    
32     96     
-720   -144   
-160   176    
112    288    
-32    48     
96     -112   
16     -32    
64     -48    
-176   -80    
128    -128   
-80    0      
-80    -128   
-32    0      
-128   -144   
16     -112   
-16    64     
-224   16     
16     112    
192    336    
-352   112    
-160   -336   
-352   -816   
304    -624   
-176   -144   
-80    -544   
16     -448   
-400   -176   
96     96     
0      144    
-80    128    
-16    96     
-208   -528   
-48    -384   
-64    128    
-176   16     
-1440  -48    
-112   16     
176    80     
64     96     
-64    16     
128    240    
-400   -624   
-144   -576   
-64    320    
-32    144    
64     224    
-240   176    
32     -32    
-32    -208   
-128   -80    
-576   -48    
224    -800   
-96    480    
112    544    
-288   -480   
-32    64     
64     -16    
32     640    
-160   592    
64     -272   
272    -160   
112    176    
-96    544    
400    -160   
48     128    
224    64     
0      -80    
208    48     
0      512    
-80    -224   
176    -64    
-224   48     
-64    -512   
240    352    
-192   464    
208    368    
-128   240    
16     304    
-48    -160   
-32    -144   
-240   -272   
-32    -16    
-896   208    
-32    304    
80     96     
48     256    
-64    48     
-416   -80    
96     240    
-96    0      
-128   -240   
-32    -288   
16     80     
64     0      
48     48     
-112   -64    
-80    192    
-128   144    
-192   64     
-48    -96    
-16    32     
-224   -96    
128    352    
-320   160    
-32    32     
0      0      
32     432    
-16    80     
64     64     
-144   112    
-224   -160   
-368   -192   
144    -32    
-48    112    
-1120  0      
-112   -16    
32     16     
192    112    
-64    160    
-64    208    
-112   64     
-144   256    
64     0      
128    176    
16     80     
-128   -16    
80     -48    
48     -48    
48     160    
48     112    
-80    96     
96     128    
-48    64     
64     32     
-112   -48    
96     -112   
0      80     
128    128    
160    0      
-32    32     
-336   -48    
256    -16    
-448   -96    
48     80     
16     144    
-64    48     
-112   176    
-16    -80    
256    -176   
48     32     
0      112    
-96    16     
-80    -16    
144    32     
-16    96     
0      16     
128    80     
-32    0      
96     96     
112    -16    
0      128    
80     96     
-80    32     
-16    80     
48     32     
-32    48     
-96    16     
48     64     
112    64     
-208   32     
16     32     
272    352    
-528   16     
16     -32    
32     32     
16     128    
96     48     
-48    0      
128    128    
240    144    
-544   16     
224    -16    
-224   48     
64     32     
64     160    
-160   -96    
176    -16    
-48    64     
64     128    
32     -16    
-48    96     
128    80     
-64    304    
160    64     
-80    -32    
64     128    
96     48     
-224   48     
80     32     
80     176    
-384   -416   
176    -624   
64     16     
-176   96     
32     16     
-16    64     
96     144    
80     272    
64     48     
-48    16     
176    192    
-144   -32    
-16    64     
32     32     
-112   112    
-48    -96    
16     -928   
0      16     
-112   496    
256    96     
-144   -288   
-64    128    
-64    -48    
-112   64     
96     64     
0      48     
-128   -32    
80     16     
-144   -272   
320    288    
-336   48     
288    -32    
-192   64     
-16    64     
192    -16    
16     96     
32     96     
-112   64     
224    208    
-128   -48    
16     32     
-32    272    
16     144    
64     80     
224    144    
-144   144    
128    -240   
-32    -64    
96     -480   
256    320    
-416   208    
160    -32    
-128   48     
208    144    
0      16     
-80    0      
208    -96    
112    144    
32     32     
96     -96    
320    256    
-240   -112   
192    112    
-96    -304   
192    48     
-16    128    
0      64     
128    80     
32     128    
-64    -80    
0      48     
48     64     
16     96     
-16    -64    
48     -112   
48     64     
128    -64    
64     64     
208    -160   
0      112    
688    -560   
-320   960    
-240   80     
96     -176   
112    64     
336    320    
-336   224    
-80    -48    
-64    -32    
336    0      
-16    128    
144    -48    
-32    64     
304    288    
272    144    
-256   -336   
48     -96    
224    -80    
64     112    
160    96     
144    352    
-80    96     
-16    112    
112    32     
80     -16    
-16    256    
16     -16    
-128   32     
256    -1040  
96     256    
64     -528   
-288   -208   
256    -160   
-208   0      
0      -96    
96     48     
96     -16    
-32    -832   
240    -80    
-240   -304   
64     272    
-240   -416   
-16    352    
144    608    
-96    208    
160    144    
-144   -16    
64     0      
96     16     
176    -16    
192    400    
112    -160   
80     32     
160    64     
-224   -368   
304    192    
0      48     
-32    368    
-288   -912   
-160   -720   
320    192    
64     128    
-288   0      
272    144    
-80    -64    
256    -224   
-128   -1184  
256    -240   
-48    160    
0      144    
160    -368   
96     96     
112    352    
-144   -224   
160    -16    
-128   -176   
96     -480   
-48    -400   
112    -288   
64     48     
112    -784   
128    80     
-144   32     
192    -112   
-16    128    
160    256    
32     -112   
0      -1152  
256    16     
-144   288    
48     464    
176    32     
-32    48     
-128   -64    
96     64     
-48    -32    
-48    -176   
-160   -48    
128    -16    
160    16     
-32    -144   
176    -48    
-16    -192   
16     32     
80     -32    
-208   -176   
176    -448   
-112   -96    
80     -176   
-32    128    
128    -48    
-240   -16    
-96    0      
0      -128   
0      -144   
272    -80    
-80    288    
80     -16    
-128   -16    
640    -192   
-112   288    
96     -64    
112    -48    
0      -96    
-32    32     
32     -16    
0      -16    
-464   -32    
16     -144   
-1712  80     
16     144    
-16    -144   
-16    -64    
-192   -32    
112    -176   
48     176    
144    -160   
-80    64     
288    160    
