# Supplementary material for: A Fault Diagnosis Method for One‐Dimensional Vibration Signal Based on Multiresolution tlsDMD and Approximate Entropy
Source: Hindawi journal article supplement (doi:10.1155/2019/3262818), 2019-01-01
Supplement: f1 [file 3262818.f1.zip › 3262818.f1/gear signals/wear gear signal/Data17.txt]

48     16     
80     80     
0      16     
240    176    
-48    -16    
80     -16    
368    416    
-432   144    
-16    -336   
32     -1504  
32     -16    
-96    -16    
96     96     
32     128    
96     128    
0      112    
96     96     
-80    576    
80     176    
32     64     
-64    16     
-80    -48    
48     -224   
-144   -96    
80     -768   
96     96     
-48    112    
80     80     
-16    80     
16     96     
-80    64     
-16    64     
160    160    
-352   -16    
400    64     
48     144    
-32    96     
128    48     
-128   96     
240    -208   
48     80     
-144   -512   
272    96     
-256   -128   
240    128    
-64    -112   
0      32     
16     64     
-80    96     
-272   -432   
112    -176   
96     128    
-32    0      
192    448    
-224   -64    
-48    64     
0      -672   
128    32     
-80    32     
-64    144    
48     112    
-144   -80    
240    -48    
96     80     
16     -16    
32     48     
240    192    
-128   0      
48     176    
32     -144   
0      304    
272    -384   
-192   224    
0      -1184  
-48    -288   
144    -304   
112    80     
-128   0      
208    272    
-32    224    
80     208    
-112   96     
-144   -256   
224    368    
-144   0      
-96    32     
96     160    
16     80     
96     -320   
16     144    
0      -64    
-16    -96    
-160   96     
208    -288   
-160   -48    
256    160    
-192   48     
208    -144   
-16    160    
64     -48    
256    448    
-240   -144   
144    -64    
0      -368   
112    192    
48     -464   
112    336    
128    144    
144    176    
-48    -96    
16     -176   
96     64     
144    112    
-16    48     
80     -16    
-16    80     
64     0      
32     64     
32     16     
64     80     
-96    -144   
256    -256   
-64    160    
96     240    
80     304    
-96    80     
128    128    
32     -48    
64     -80    
-32    -160   
336    176    
-32    112    
-32    48     
192    0      
-16    64     
240    -288   
-192   32     
32     -80    
48     96     
-80    -2032  
64     -112   
96     -560   
128    -16    
192    -240   
-64    -96    
112    128    
-208   -272   
96     16     
-64    48     
16     -832   
16     48     
-176   -208   
128    -16    
-320   -560   
384    -1040  
112    -32    
-16    -400   
96     -448   
-32    -896   
144    -64    
80     288    
112    112    
-16    48     
112    -112   
32     -160   
-48    64     
160    -208   
-32    32     
96     80     
128    -16    
-640   -80    
112    -192   
112    384    
192    224    
-128   416    
-128   -528   
16     -432   
32     -784   
192    0      
-32    176    
-112   -272   
0      -272   
-64    -624   
752    -96    
-48    1200   
-96    0      
368    -848   
160    176    
144    64     
48     64     
32     -16    
-256   -256   
352    -1104  
-368   -432   
-16    -448   
-16    -32    
336    112    
16     -176   
192    352    
-144   112    
-80    -224   
416    128    
-464   304    
240    368    
-112   160    
64     -112   
64     -144   
144    -288   
32     16     
48     -128   
-144   -64    
176    -144   
208    160    
16     624    
-320   -16    
16     -288   
-96    -112   
-304   -64    
-112   -144   
-304   32     
144    256    
-32    16     
-16    -80    
112    -96    
160    -1744  
-112   -128   
-64    128    
272    64     
-48    48     
-48    16     
160    128    
-176   -576   
-416   -176   
432    -16    
-1200  192    
176    -208   
-160   0      
208    -304   
208    400    
-64    -1584  
448    144    
-272   112    
432    176    
-480   -80    
-48    -80    
-192   -80    
96     32     
-224   16     
112    96     
-192   16     
144    -112   
80     112    
0      -256   
0      -32    
256    -256   
192    16     
-224   48     
112    -48    
-320   96     
-240   32     
32     144    
0      -64    
80     64     
0      48     
160    -32    
0      -128   
-112   -16    
144    -112   
-64    -64    
256    -112   
96     -64    
-48    0      
352    80     
-384   32     
96     16     
-240   -16    
128    80     
-208   32     
-112   -208   
-240   -112   
176    96     
-16    112    
-240   -96    
64     128    
-80    0      
-288   0      
-16    16     
-272   32     
-32    32     
-192   0      
-80    -64    
-128   -48    
48     0      
32     -16    
-272   112    
-32    0      
48     80     
-512   -192   
80     128    
-80    192    
-320   32     
224    0      
-144   160    
112    32     
-944   -80    
80     0      
192    -48    
304    288    
-336   64     
112    -16    
16     -144   
128    16     
-48    -256   
32     208    
-256   32     
0      80     
208    288    
-656   -160   
-96    32     
32     -64    
-64    144    
-1120  -160   
-144   64     
144    32     
-320   112    
96     -64    
-48    0      
32     80     
-32    48     
-80    112    
-32    -32    
16     -16    
-48    -16    
-160   128    
0      64     
-32    32     
-64    -80    
0      32     
-64    16     
80     160    
-144   -80    
16     128    
-32    0      
-96    -16    
16     80     
-256   -32    
96     80     
32     48     
-16    96     
-48    48     
-16    -32    
-272   -336   
192    304    
-1072  -16    
32     144    
-64    -112   
96     112    
0      32     
-208   32     
-32    0      
16     112    
-256   0      
96     16     
-80    48     
-16    -32    
48     64     
128    32     
-224   176    
-496   0      
-64    224    
32     -128   
-16    64     
128    0      
-48    32     
-48    16     
-16    -16    
144    0      
32     0      
-16    -80    
48     160    
-304   112    
96     64     
16     160    
-224   16     
64     32     
-352   -80    
144    272    
-208   192    
80     144    
-128   32     
64     -32    
32     128    
-32    0      
32     64     
16     64     
48     80     
112    176    
-160   208    
-144   -48    
64     144    
-128   -48    
288    160    
-96    64     
32     48     
-32    -48    
128    144    
-240   -16    
32     -16    
112    208    
-176   -16    
-384   -224   
64     -624   
64     -96    
-208   -464   
16     -128   
400    400    
-240   448    
240    352    
-400   -128   
96     48     
-112   16     
112    64     
80     16     
96     160    
-80    -16    
128    224    
32     112    
-32    -80    
16     112    
-192   224    
-208   -224   
-176   -352   
112    -96    
416    144    
-80    48     
272    64     
48     112    
224    288    
-160   208    
-176   -256   
-272   -144   
304    -240   
208    -192   
-144   -160   
-48    80     
112    192    
-496   96     
144    240    
112    432    
-128   640    
80     304    
48     208    
-48    0      
16     48     
32     -16    
-16    -32    
96     -144   
80     0      
208    0      
96     272    
0      80     
0      96     
96     304    
16     -192   
-80    96     
32     -464   
192    112    
0      -16    
16     176    
64     112    
64     96     
-144   16     
96     -272   
16     80     
32     32     
-224   144    
304    -528   
144    224    
272    896    
-304   32     
64     -272   
112    -112   
0      288    
32     32     
-160   48     
160    176    
-32    64     
-80    -224   
48     -128   
-160   -336   
208    80     
-144   352    
48     48     
16     96     
32     128    
16     128    
64     352    
-240   32     
-32    -368   
-48    -512   
96     -16    
-144   64     
224    -544   
48     80     
-96    128    
208    80     
-80    80     
-64    32     
176    112    
16     96     
-64    64     
80     32     
0      16     
48     112    
-112   0      
480    288    
-160   496    
0      -144   
-32    -64    
-32    -560   
32     16     
-64    80     
176    112    
-80    224    
0      48     
80     -144   
112    96     
176    80     
-80    48     
80     -80    
160    128    
-80    112    
224    -432   
-80    208    
80     -304   
128    48     
-96    32     
32     -64    
-128   -272   
-80    -720   
-32    -368   
128    192    
-32    32     
160    224    
-272   -144   
336    -192   
-80    192    
-16    -576   
48     -672   
96     272    
384    176    
48     320    
16     64     
48     16     
112    160    
-16    240    
80     -16    
-16    32     
-80    80     
560    576    
-176   640    
-96    0      
224    -48    
80     96     
0      -96    
48     176    
-288   -64    
464    -880   
-48    768    
80     160    
-144   -336   
256    224    
224    288    
-96    96     
64     144    
64     448    
-128   288    
144    -896   
64     256    
32     -912   
224    384    
-112   -192   
32     -128   
64     -1200  
80     240    
64     320    
32     208    
-64    -48    
-160   112    
256    144    
128    -624   
-128   16     
208    -256   
-144   16     
16     -80    
48     -96    
112    -352   
-16    -80    
224    16     
32     192    
64     80     
-32    0      
0      -240   
-16    -416   
112    128    
48     176    
-320   -48    
496    448    
-256   720    
-192   144    
-288   -96    
-176   -432   
176    -16    
-224   0      
0      -112   
-224   -144   
288    -1200  
-256   112    
80     -144   
-96    -1280  
144    -16    
-32    0      
-48    -64    
-32    -64    
64     -112   
-32    80     
-48    -208   
416    16     
-480   48     
32     -336   
176    96     
-64    -976   
224    -16    
-112   -32    
112    -400   
-304   224    
128    -368   
-208   -96    
128    -512   
64     80     
64     112    
0      -160   
-32    -656   
48     -16    
128    -240   
-160   208    
-192   -48    
48     -144   
-688   -64    
-64    64     
320    -80    
-48    -736   
384    80     
-384   -16    
16     48     
128    64     
0      -112   
-64    0      
64     64     
96     -64    
-224   32     
16     -32    
16     -80    
-624   -112   
48     -144   
32     -96    
112    -128   
-48    32     
-16    -176   
64     16     
48     -2016  
64     -144   
64     -320   
32     16     
176    64     
32     16     
-256   -16    
16     -96    
-208   16     
192    0      
-656   -16    
0      -96    
208    32     
-304   -160   
192    64     
-64    -528   
208    384    
288    -112   
-160   96     
208    -32    
0      -160   
-96    0      
32     -192   
-48    96     
144    64     
-112   -80    
224    -192   
96     160    
80     -112   
-32    -128   
0      -288   
160    192    
192    160    
-112   -48    
-160   -32    
-64    -208   
304    16     
32     48     
-112   0      
128    -16    
-400   -144   
160    -48    
-1248  -48    
16     -112   
64     48     
16     -144   
-32    64     
336    -624   
-96    144    
-96    -112   
64     -48    
16     -64    
-48    16     
0      16     
144    32     
-112   -48    
16     -112   
0      -16    
48     48     
-32    48     
48     -336   
16     80     
-48    -256   
208    -16    
-336   -112   
96     0      
0      32     
64     -16    
-160   -48    
48     -16    
0      32     
96     48     
-96    -32    
80     -144   
48     112    
-80    -336   
16     32     
160    -176   
112    64     
-144   48     
64     16     
-112   -64    
48     -16    
-64    16     
-48    48     
144    -16    
96     64     
-176   -32    
192    -240   
-144   64     
-128   -224   
288    0      
32     32     
-416   -48    
-160   -48    
176    -272   
64     32     
-64    80     
-144   -32    
80     -16    
-192   -128   
-272   80     
-496   192    
-288   112    
176    -32    
-160   -96    
336    -80    
0      -144   
-480   -288   
-240   96     
-64    -80    
-16    -256   
-224   96     
-112   160    
16     -336   
-64    288    
96     64     
-96    32     
-32    -176   
48     -224   
336    -144   
-224   48     
-144   -16    
32     -144   
32     64     
128    112    
0      160    
-288   16     
-48    112    
-784   16     
48     32     
48     288    
32     288    
-96    112    
-64    672    
-320   192    
-80    384    
64     144    
-80    208    
160    288    
96     -80    
-352   -448   
64     -128   
-208   -48    
-32    128    
-256   -32    
16     -64    
32     192    
16     160    
272    320    
224    720    
-320   144    
-80    -272   
48     -16    
-80    416    
112    352    
-80    160    
-128   -16    
256    16     
-432   -48    
-48    -256   
-592   -624   
160    -16    
0      48     
144    432    
-64    48     
-288   -208   
256    48     
-224   128    
400    272    
-544   -720   
320    -864   
528    704    
-400   336    
-64    32     
32     -128   
-224   16     
96     208    
-128   -464   
432    96     
-208   576    
-320   -528   
208    -448   
-64    -256   
304    -48    
160    960    
-160   -176   
64     -448   
-48    -48    
32     32     
112    64     
-256   -64    
320    160    
-16    16     
-176   -16    
128    48     
-96    -96    
176    48     
-80    32     
-32    64     
32     -304   
-112   128    
512    -48    
-512   -320   
0      -144   
224    384    
-160   608    
160    160    
-144   48     
16     -32    
80     -160   
-144   -96    
304    -16    
-208   320    
16     -16    
-112   -64    
64     64     
32     -16    
-80    224    
-112   -48    
80     -32    
0      224    
-144   448    
336    224    
-80    96     
32     64     
-272   -144   
176    -16    
0      32     
-32    16     
96     80     
32     80     
48     64     
48     112    
-64    0      
32     96     
-64    0      
-16    48     
-288   16     
192    -496   
16     -64    
-160   -448   
32     528    
96     512    
-32    432    
112    272    
16     -16    
-64    96     
176    272    
-208   160    
16     -96    
144    96     
-32    208    
-288   -288   
128    -608   
48     320    
-112   432    
288    -416   
-80    368    
160    144    
-80    176    
48     448    
-240   -48    
112    -96    
-16    112    
0      96     
-208   -576   
288    -16    
-32    416    
64     352    
208    352    
-336   -304   
192    400    
208    464    
-192   -16    
192    -64    
64     224    
-48    144    
128    -80    
-48    -32    
240    240    
-16    272    
-144   -624   
384    576    
-176   704    
256    272    
-208   -240   
48     -208   
32     64     
192    -64    
-224   -640   
32     -384   
112    -96    
-16    48     
32     -192   
-112   -2304  
-32    -96    
-16    -112   
64     48     
96     64     
-176   -496   
-16    -304   
0      -128   
-48    -272   
176    -32    
16     -48    
16     112    
-128   96     
-96    32     
-32    -80    
-64    -640   
192    160    
64     208    
-32    -64    
336    96     
16     -32    
-48    -128   
176    -240   
80     -112   
144    112    
-128   32     
176    -80    
-208   176    
0      64     
16     32     
112    48     
16     48     
-16    112    
16     -144   
96     176    
96     32     
-192   -480   
-144   -192   
64     224    
-208   112    
16     64     
32     320    
48     176    
144    224    
16     -16    
128    -432   
48     -48    
32     -1184  
80     160    
128    160    
80     224    
-80    64     
64     -16    
288    320    
-16    16     
32     -112   
432    32     
-80    -64    
128    -240   
-304   0      
64     -304   
0      48     
32     -432   
112    160    
-208   -192   
384    0      
-384   -32    
288    80     
-16    32     
192    240    
-144   224    
-112   320    
80     416    
-272   80     
288    192    
-32    144    
-160   -112   
304    -32    
-16    144    
80     -816   
-16    112    
-112   -832   
32     16     
96     160    
-80    112    
0      336    
-80    16     
-96    128    
48     -128   
64     48     
-16    -144   
80     160    
-32    -688   
112    112    
-112   -1232  
-96    0      
0      -240   
64     160    
96     48     
0      80     
48     128    
112    -48    
-128   -128   
144    -272   
0      80     
128    -608   
64     176    
240    -112   
-112   48     
-32    -16    
144    32     
80     -288   
96     112    
-48    64     
64     176    
128    0      
-16    0      
144    112    
-80    -80    
-32    48     
48     -304   
96     -80    
144    176    
256    208    
-304   0      
272    16     
-224   -1248  
176    64     
-160   32     
96     -432   
64     16     
-112   -32    
192    -2448  
-176   -48    
144    640    
112    0      
80     48     
-32    32     
160    48     
-256   -368   
96     -64    
128    48     
144    -544   
-96    128    
304    0      
-80    -432   
80     -64    
0      -384   
48     -160   
176    -336   
16     64     
64     -768   
-64    -80    
-80    -64    
64     -96    
80     -80    
16     80     
176    -304   
0      32     
16     -48    
128    -256   
-336   0      
112    -224   
-32    -48    
-64    -144   
144    -96    
160    -1168  
-48    -80    
48     96     
32     0      
96     48     
64     -16    
80     -32    
-96    16     
-256   -48    
48     -208   
-160   -32    
224    144    
48     0      
16     -240   
16     -160   
-64    -384   
176    -32    
160    -368   
0      208    
96     32     
-160   -32    
80     -176   
-80    -144   
-16    320    
256    144    
-176   -32    
-16    -224   
-1248  48     
112    -496   
-64    -512   
144    80     
16     160    
48     -240   
64     144    
-64    -208   
-16    -192   
96     704    
192    -224   
144    176    
-224   16     
-144   -384   
144    208    
112    304    
-112   0      
-80    -480   
128    -352   
240    80     
144    -832   
160    -32    
144    176    
80     112    
176    96     
-16    -16    
-128   -96    
288    112    
-176   -48    
-80    -160   
-32    -576   
144    224    
-624   128    
48     -528   
-112   -112   
16     -336   
32     -112   
128    -752   
-16    144    
-96    384    
176    256    
-144   80     
96     -176   
-112   16     
128    -112   
-32    -288   
64     176    
-480   176    
-320   -416   
112    -384   
240    480    
-80    176    
64     -480   
112    112    
80     -16    
-128   640    
64     160    
32     -144   
-80    144    
160    -16    
-416   -496   
800    -896   
-336   384    
-112   -80    
-96    -224   
224    -224   
-64    128    
560    -96    
112    208    
-304   784    
-64    -352   
-112   -160   
-80    192    
-304   0      
48     -80    
-480   -288   
400    576    
-240   -144   
160    768    
-112   496    
-1040  -80    
-224   -80    
112    -240   
-176   240    
-32    144    
-608   -128   
-96    240    
16     -80    
32     560    
-64    -208   
112    -96    
-176   160    
-272   -400   
-832   -480   
-64    16     
-192   80     
16     96     
112    176    
-384   32     
48     48     
-256   0      
-176   16     
-224   16     
192    352    
-256   336    
-128   -640   
192    -240   
16     176    
160    -416   
-352   160    
320    -432   
-224   32     
-160   16     
-16    0      
-224   208    
-288   -208   
-96    48     
-32    -80    
-288   -416   
-928   -176   
16     144    
-352   -288   
64     192    
16     -240   
192    192    
-16    752    
-16    -224   
-368   -560   
256    64     
-112   -48    
224    576    
-272   288    
176    -16    
-304   336    
-304   -336   
32     0      
-272   48     
240    112    
16     -16    
16     48     
-96    -32    
-96    0      
-32    64     
-32    64     
-32    96     
112    -176   
80     -16    
160    528    
-496   -48    
-16    -592   
128    -16    
-880   96     
-32    32     
-208   -416   
320    624    
-64    368    
-128   -32    
160    144    
-192   128    
304    400    
-304   304    
-32    208    
32     -160   
-208   -208   
-16    -208   
-32    192    
-352   0      
-80    400    
-32    208    
192    240    
-16    240    
-112   48     
144    64     
-208   112    
16     144    
464    512    
-144   768    
368    624    
-208   336    
-224   288    
240    -64    
-272   -112   
112    -64    
32     -80    
112    96     
-16    -48    
-144   -64    
160    208    
-160   48     
48     0      
80     48     
96     80     
-240   -112   
80     -16    
-192   -48    
160    96     
-192   -48    
80     112    
-336   64     
256    -80    
-80    80     
-192   0      
64     48     
64     64     
208    272    
-288   96     
64     128    
-160   -176   
-48    -48    
32     -16    
-48    64     
-144   -64    
64     32     
-48    -64    
48     32     
0      64     
-176   96     
48     16     
-96    96     
-32    -16    
-128   0      
80     -64    
0      48     
-16    48     
-16    -32    
112    48     
-96    -32    
128    240    
-144   -16    
64     32     
336    192    
-96    0      
160    48     
48     80     
-48    112    
-32    96     
16     208    
368    432    
-464   224    
16     112    
96     112    
-144   -96    
112    -240   
-272   -384   
192    -176   
-64    176    
16     160    
176    208    
192    224    
-208   -32    
-144   -32    
96     -32    
32     16     
16     128    
144    192    
-16    128    
96     32     
-80    -288   
208    144    
0      -32    
0      -16    
288    80     
208    16     
-16    64     
-48    320    
-96    48     
-16    32     
64     304    
464    272    
-128   160    
-128   160    
80     176    
112    64     
80     -64    
32     -32    
208    -16    
32     80     
-112   -480   
64     128    
-144   96     
-256   -32    
48     144    
-48    112    
32     48     
0      240    
64     -672   
-176   64     
128    64     
-16    48     
32     80     
-48    -32    
48     48     
-96    -48    
-272   32     
80     0      
0      -128   
-80    144    
160    48     
32     96     
-96    -272   
-16    -656   
-80    -48    
-32    -48    
32     64     
112    112    
80     128    
-208   48     
112    80     
240    64     
-80    64     
112    48     
16     128    
144    48     
-32    80     
48     96     
80     -16    
80     176    
160    -704   
-192   80     
176    144    
-176   16     
96     48     
96     112    
112    160    
112    64     
-352   112    
240    -32    
-144   -32    
144    96     
-64    224    
64     -80    
16     32     
-48    -2080  
192    16     
-64    0      
96     0      
176    0      
96     160    
64     -16    
32     112    
-16    -112   
-128   -64    
192    -48    
320    208    
-320   176    
-112   -176   
288    240    
-16    -208   
-48    -160   
128    -752   
64     -112   
-96    -192   
32     32     
112    -160   
64     -64    
-64    -176   
32     -320   
-16    32     
160    -48    
32     208    
-16    48     
-128   -400   
64     -176   
160    224    
-16    112    
352    320    
-192   -736   
32     -112   
112    304    
-48    -32    
48     64     
352    320    
-112   608    
32     80     
144    96     
80     -64    
-32    256    
-48    -640   
16     -128   
-80    -1264  
-80    80     
80     -1216  
48     128    
304    288    
-240   -336   
32     32     
112    96     
0      80     
96     -272   
-16    80     
16     -96    
80     128    
0      -688   
96     -240   
-256   320    
256    -816   
64     352    
144    240    
-48    96     
96     16     
16     -384   
-48    -128   
112    -64    
240    -128   
128    528    
-96    -288   
96     -304   
-32    -176   
64     224    
288    416    
-224   352    
64     128    
-368   -272   
0      -560   
272    -544   
128    416    
64     80     
256    -144   
112    -192   
-256   -1136  
-80    -464   
0      -160   
208    -144   
0      304    
-128   672    
112    480    
-208   -480   
-64    -752   
48     -16    
0      -224   
-80    96     
80     272    
-272   160    
144    -128   
-80    -64    
-80    -144   
-208   -128   
-160   16     
-16    48     
416    240    
-336   240    
0      -400   
48     -432   
80     544    
192    -848   
-32    -544   
-688   240    
112    560    
-16    144    
80     -432   
0      0      
448    320    
-112   32     
-416   -1216  
480    208    
144    656    
-480   -112   
384    -720   
-16    -64    
-128   192    
-16    256    
-608   -768   
320    -1552  
384    176    
32     784    
-48    -288   
144    -208   
64     -144   
0      -704   
-32    -224   
288    -624   
160    96     
96     208    
240    112    
-48    -464   
96     16     
-48    224    
64     128    
352    368    
-112   160    
224    -16    
80     288    
-112   -16    
-224   -240   
192    -144   
-48    -96    
64     -16    
160    128    
-64    96     
-16    304    
208    336    
-64    -64    
-80    -80    
-832   112    
-80    -528   
-64    144    
128    192    
-112   -208   
-64    -272   
64     224    
-256   -1360  
96     -352   
192    448    
-32    -224   
128    96     
-144   48     
-144   -288   
16     -144   
-112   368    
96     416    
-544   96     
-48    -624   
208    -176   
208    432    
-144   272    
208    -1712  
-32    -208   
-64    -32    
128    128    
-192   -224   
64     -336   
16     224    
0      128    
160    256    
-240   -400   
-80    16     
144    -416   
-32    -272   
128    -208   
32     0      
-112   -176   
128    32     
-144   80     
144    -112   
-96    112    
128    32     
48     80     
32     -48    
16     240    
-32    -48    
-112   240    
320    448    
208    400    
32     -32    
0      192    
160    16     
48     -64    
-96    -64    
144    16     
32     96     
144    112    
128    256    
-96    -160   
-224   0      
128    -208   
-240   -208   
144    -304   
128    -32    
-464   -144   
96     96     
-1680  -448   
-240   -128   
96     48     
-272   96     
-112   0      
64     -32    
-192   32     
64     64     
48     128    
-96    -16    
32     80     
96     256    
-224   208    
-544   -32    
128    96     
0      128    
-176   112    
-112   64     
-144   96     
-368   32     
-928   32     
-144   -16    
48     -16    
16     64     
80     0      
48     -16    
-96    -144   
128    64     
-96    -96    
48     416    
160    208    
-176   -112   
48     -272   
-176   -32    
272    0      
-544   16     
144    -32    
-672   -64    
288    -32    
-96    240    
-128   0      
-16    48     
112    144    
-144   -64    
64     48     
96     80     
-96    -144   
-48    -48    
16     -32    
-64    -160   
48     -48    
-96    48     
48     48     
64     -80    
-512   -176   
304    48     
-32    128    
64     48     
-144   -128   
80     -48    
64     -32    
-448   -80    
96     80     
-64    -32    
-96    16     
-16    64     
-96    64     
-528   -128   
-64    48     
-80    32     
-16    96     
-320   -368   
464    112    
-144   256    
-272   64     
-96    96     
-272   48     
96     176    
-32    160    
-32    -16    
-144   64     
-48    96     
-160   -112   
128    112    
-48    -48    
160    128    
48     -112   
128    320    
-272   -32    
192    256    
-48    64     
-112   -16    
-32    -32    
96     80     
-288   -160   
288    64     
-176   48     
288    144    
-112   96     
-48    48     
112    96     
-704   64     
144    48     
16     96     
96     48     
-32    48     
-240   0      
192    -80    
-176   -48    
0      48     
208    256    
-384   144    
-128   -80    
112    128    
-144   -96    
-48    96     
32     240    
112    -16    
-176   0      
80     96     
-192   -16    
-64    16     
-64    64     
-32    -64    
144    -16    
-112   -32    
64     -16    
-112   32     
80     -144   
-112   -96    
128    144    
-80    80     
128    112    
-16    48     
-80    -48    
112    0      
144    32     
176    128    
96     224    
-208   112    
-48    -64    
0      0      
-32    144    
64     80     
-176   32     
16     -144   
160    -112   
16     -176   
64     -16    
-48    192    
80     80     
48     192    
-96    -288   
-144   -464   
0      64     
48     208    
0      -80    
-128   -32    
0      16     
-128   -144   
48     -256   
-32    -64    
-16    48     
64     -80    
-16    96     
128    48     
-32    64     
16     64     
-48    64     
112    64     
-96    -32    
80     80     
-160   -80    
80     112    
-160   -48    
-80    208    
-32    304    
208    -112   
272    592    
-96    -112   
-48    -288   
112    -160   
128    368    
-48    -368   
128    48     
-96    -160   
144    -16    
-160   -176   
144    176    
48     -64    
80     144    
48     144    
80     -48    
-64    256    
0      208    
16     48     
48     224    
-48    112    
224    32     
-64    -176   
-48    -208   
144    256    
-96    112    
32     -272   
96     -16    
64     128    
-48    -32    
-48    -192   
112    272    
-112   208    
176    -48    
-32    -48    
-96    -112   
16     -64    
32     128    
16     0      
-16    128    
48     48     
-96    -368   
176    80     
-64    80     
16     48     
0      64     
64     64     
16     96     
80     128    
-16    -48    
80     48     
16     208    
-112   16     
96     -240   
32     128    
32     304    
0      -288   
16     160    
-48    -816   
16     160    
96     480    
240    544    
-144   368    
-256   256    
16     192    
-176   -80    
-256   -272   
-80    -288   
-240   -112   
384    -112   
-384   48     
288    32     
144    -256   
224    -320   
-16    176    
-208   240    
384    256    
-160   256    
-80    496    
-256   16     
272    80     
-224   416    
0      -176   
-16    -368   
-416   -464   
288    0      
80     144    
-128   160    
288    -752   
208    384    
-256   -2000  
160    96     
336    64     
-80    288    
96     -240   
320    -32    
160    640    
16     48     
384    64     
96     560    
448    544    
-448   -400   
-48    -704   
352    -128   
-80    288    
96     -624   
-80    368    
240    384    
-80    64     
-16    -272   
144    288    
-32    -256   
-48    -32    
352    160    
-16    0      
16     64     
-48    -336   
-288   -480   
-208   -1488  
720    304    
-672   -144   
0      -768   
352    -2816  
224    688    
288    592    
-32    176    
96     80     
96     224    
256    576    
80     -32    
-96    -144   
272    -496   
80     144    
224    80     
160    352    
-48    -144   
-144   256    
64     -480   
32     48     
-80    128    
-64    288    
128    144    
16     0      
0      208    
80     -16    
-144   48     
160    0      
-48    240    
-32    32     
64     224    
0      0      
336    304    
-208   176    
0      160    
144    -48    
64     -688   
96     48     
0      -272   
352    336    
-288   64     
64     -176   
32     -160   
-16    16     
144    -176   
208    16     
80     -112   
112    64     
288    176    
-16    -720   
384    384    
-160   0      
0      -624   
-16    -112   
80     16     
64     -112   
0      -1152  
48     -240   
48     64     
-208   -272   
176    -48    
-272   -336   
176    -368   
-48    64     
320    -224   
-208   -288   
64     -496   
0      -112   
192    48     
112    -288   
16     -64    
16     -288   
48     -96    
112    -480   
16     80     
432    208    
-320   -16    
352    224    
-528   144    
96     -32    
480    432    
-608   48     
16     16     
-464   -112   
16     -64    
-32    -160   
64     -240   
-32    -16    
0      -448   
0      -96    
128    -336   
-208   -64    
144    -112   
32     112    
64     0      
-80    80     
-64    32     
16     -80    
-304   -16    
176    80     
-768   96     
-96    32     
80     0      
144    48     
176    16     
-32    -384   
160    80     
0      96     
-224   -48    
304    -160   
-160   -112   
80     48     
176    -48    
-176   48     
208    80     
-624   -176   
320    -96    
160    -48    
-272   -352   
288    96     
128    -224   
0      -80    
-160   -496   
160    -48    
-64    -48    
32     0      
-48    96     
48     -128   
-16    32     
128    32     
-128   80     
48     -80    
0      16     
-16    -128   
80     16     
48     -240   
-16    -48    
48     -960   
368    336    
-416   -32    
48     -96    
80     16     
32     32     
-256   -112   
-16    -48    
-96    96     
-64    -48    
-112   192    
128    -64    
80     112    
-144   -144   
112    -80    
-96    -256   
272    80     
-176   80     
-192   -224   
432    -64    
-16    64     
-16    224    
-224   -96    
-80    -256   
80     96     
-192   -48    
-80    -224   
144    80     
-144   -288   
48     -16    
176    -224   
32     -48    
176    480    
-336   160    
32     -16    
0      48     
-16    -96    
208    96     
-496   112    
48     -192   
-592   -128   
288    -48    
-288   160    
-32    -240   
48     128    
-208   -336   
-288   16     
0      80     
-112   80     
-64    128    
304    0      
-112   80     
128    160    
48     -32    
-80    -16    
-48    -16    
-1184  -192   
48     144    
-480   32     
-320   160    
176    -32    
-848   32     
256    -32    
-176   96     
64     32     
-240   -16    
32     32     
320    32     
-272   80     
0      16     
48     128    
-128   0      
-160   -112   
-32    -192   
112    64     
-64    96     
0      32     
192    80     
-432   112    
0      16     
-464   -48    
48     16     
-928   -32    
80     -16    
352    288    
-432   208    
0      -80    
-192   -16    
160    -208   
160    -16    
48     48     
96     48     
144    128    
32     64     
32     144    
-208   48     
-32    -32    
160    96     
-128   144    
-176   64     
64     48     
-48    -208   
128    224    
-32    -48    
-240   -160   
80     -80    
-128   176    
176    176    
-272   400    
64     64     
-32    240    
224    592    
-400   -288   
-48    320    
-1696  -512   
-32    224    
144    560    
-48    -272   
128    -112   
-224   -1104  
-48    448    
144    -48    
-224   384    
-32    48     
-224   -352   
128    272    
-96    0      
-368   -80    
80     16     
16     48     
-32    64     
-48    -32    
176    80     
-96    48     
48     64     
-48    80     
0      -80    
-48    -16    
-16    64     
-32    -208   
64     -176   
-16    144    
0      160    
32     64     
-144   -160   
16     -80    
-848   -304   
144    0      
-128   80     
192    160    
112    160    
-96    224    
160    64     
-192   0      
160    -16    
-64    112    
0      32     
-112   32     
96     48     
-256   -112   
-96    -208   
-880   -576   
96     96     
0      112    
-64    -16    
128    80     
144    112    
-144   96     
-16    0      
64     208    
64     192    
16     336    
-464   -48    
-64    -176   
-240   -112   
80     112    
-176   32     
224    96     
-112   80     
208    112    
-240   96     
-16    -32    
-64    112    
128    32     
0      80     
-16    16     
16     128    
-96    -80    
80     -32    
-160   -48    
48     -48    
-48    48     
-16    240    
-16    240    
-64    -64    
272    224    
-160   208    
224    64     
-32    512    
240    592    
-448   32     
64     -32    
-64    0      
-224   208    
0      48     
-96    128    
176    -16    
-144   416    
320    336    
-64    256    
48     464    
96     -160   
-112   -64    
-144   32     
560    480    
-496   288    
-208   96     
112    0      
208    -16    
-592   432    
176    240    
-32    128    
-64    -112   
192    368    
-48    288    
-96    -16    
64     -160   
16     208    
-112   -48    
112    -256   
160    176    
0      432    
32     80     
192    208    
32     96     
-176   32     
336    192    
-16    16     
240    144    
-144   128    
112    96     
-128   64     
-32    96     
144    160    
80     -16    
-112   112    
160    32     
-160   -192   
-304   -480   
208    -240   
-96    48     
-48    -48    
16     48     
-160   -400   
-160   -80    
96     16     
-80    320    
-16    0      
-128   -112   
80     128    
-96    -16    
-80    128    
-288   -384   
0      -432   
-32    0      
-80    -16    
48     -48    
48     -144   
-16    -128   
304    144    
64     80     
32     32     
-64    48     
-16    -16    
256    128    
-64    0      
32     -64    
-256   -224   
384    -208   
-16    192    
240    -272   
-144   -48    
144    -80    
48     80     
48     160    
96     80     
-144   -32    
16     -32    
176    144    
160    112    
-80    16     
160    112    
0      112    
16     -288   
80     32     
32     -336   
16     0      
96     80     
272    224    
-112   80     
0      144    
48     16     
64     80     
80     112    
256    48     
-128   -80    
176    224    
16     -128   
224    -176   
224    320    
-80    -64    
32     112    
112    -848   
-32    16     
96     144    
256    400    
-208   144    
208    160    
192    160    
-144   128    
-48    -32    
-48    -144   
80     64     
80     -32    
-96    -16    
304    160    
-112   96     
48     -256   
304    48     
-80    192    
176    128    
64     0      
-160   304    
64     -48    
160    224    
160    64     
-144   -32    
336    96     
-208   -96    
112    48     
48     -304   
-64    48     
0      -864   
192    64     
32     -160   
-96    32     
0      -128   
48     32     
48     112    
-32    96     
112    96     
224    -48    
-80    80     
144    -432   
-96    64     
48     -176   
192    224    
0      -64    
112    128    
128    -16    
112    128    
112    -32    
-80    112    
64     48     
192    -288   
-32    48     
-240   -576   
352    32     
80     -224   
-96    112    
272    160    
-128   80     
128    -240   
0      160    
96     -752   
-80    80     
448    320    
-400   128    
64     32     
192    -96    
-16    -240   
96     -144   
0      32     
-48    -80    
336    192    
32     -80    
0      304    
240    -80    
-16    128    
-16    0      
-96    -112   
96     80     
16     -1040  
144    -336   
-160   -16    
48     -16    
-96    -32    
48     -128   
128    -128   
32     -512   
128    -32    
0      96     
-16    208    
208    -48    
-192   -144   
192    -496   
-48    48     
64     -64    
128    -224   
80     16     
64     -112   
80     0      
16     -352   
144    -96    
128    -928   
-16    -208   
16     32     
48     160    
-32    -16    
144    96     
80     -112   
-48    0      
48     16     
160    -112   
-176   96     
-16    -96    
-320   -576   
-64    -688   
96     32     
-96    -208   
-32    0      
16     -1872  
-48    -176   
144    -32    
-240   64     
0      -16    
-112   -80    
64     32     
-32    32     
-592   -112   
32     -64    
-480   -96    
-192   -288   
320    -16    
64     144    
-48    -144   
-48    -448   
-16    224    
144    -64    
-304   160    
160    -112   
96     64     
80     48     
-464   -160   
64     -32    
48     96     
-416   -64    
48     -80    
64     48     
-112   -240   
-560   -128   
144    -352   
128    256    
-192   -1248  
48     192    
208    96     
-128   -304   
-192   -224   
256    -96    
-192   -48    
48     96     
-288   -144   
-96    -16    
-928   160    
-16    64     
-96    -48    
-64    -352   
256    -272   
128    -624   
192    368    
48     480    
-176   144    
48     32     
464    528    
-224   224    
112    -240   
-16    32     
80     -16    
0      -16    
32     -80    
-272   224    
32     -608   
-16    -368   
128    80     
-176   464    
352    -48    
-192   32     
-80    -128   
-144   -160   
-160   160    
256    432    
-304   -80    
64     -240   
144    448    
144    16     
-176   -208   
112    16     
48     16     
0      -128   
96     -48    
-144   208    
96     336    
80     224    
-208   368    
-32    96     
-96    160    
48     -128   
-32    48     
96     112    
-272   -384   
160    64     
176    -176   
-80    80     
-48    -208   
-560   48     
160    32     
-576   0      
-48    0      
48     -16    
-64    48     
320    144    
-272   128    
80     48     
-208   -320   
-1056  -192   
192    64     
-304   -224   
48     -288   
-48    0      
-288   96     
-112   32     
-880   64     
80     -32    
-544   32     
64     96     
-48    -240   
-32    -16    
112    -240   
80     -32    
-80    16     
112    96     
-176   -112   
144    176    
-176   -176   
64     -32    
-32    0      
-400   80     
-48    32     
-96    48     
-128   16     
-512   -288   
48     32     
-112   32     
128    192    
-192   32     
64     144    
32     -48    
176    -64    
-32    64     
16     48     
48     64     
-80    -32    
16     -192   
-64    -16    
112    496    
272    240    
0      -112   
-32    16     
48     48     
-144   -80    
48     80     
-192   -112   
-96    -240   
224    240    
144    352    
-192   336    
80     -240   
-192   -80    
-128   -304   
160    -48    
64     352    
-96    -160   
720    656    
-672   512    
32     -752   
-128   -80    
480    0      
-176   112    
96     -80    
144    304    
-240   -144   
-240   0      
128    304    
64     192    
-16    224    
-160   -64    
-80    -176   
-320   240    
-112   96     
128    160    
-128   208    
-64    160    
0      176    
-80    592    
208    464    
32     224    
-16    64     
16     0      
-176   -128   
64     16     
-96    48     
48     64     
-16    96     
-320   -208   
-160   -608   
-128   -384   
112    80     
16     176    
64     384    
-224   256    
-128   256    
240    -16    
-48    -32    
-144   48     
32     128    
-112   0      
176    64     
-96    48     
48     128    
-976   -224   
192    336    
-240   256    
-400   -288   
464    -256   
-176   256    
144    48     
112    -32    
128    48     
208    -32    
-240   -16    
512    80     
-304   144    
160    0      
-192   96     
-16    64     
0      48     
16     -32    
-16    -48    
-16    -80    
144    -64    
16     0      
32     -16    
80     112    
-32    16     
32     -144   
0      160    
192    80     
-192   -32    
64     80     
-16    272    
208    368    
-128   48     
-144   -128   
336    -16    
-64    176    
80     0      
96     144    
160    192    
-128   -96    
64     16     
0      -112   
272    -64    
0      112    
-16    64     
80     32     
-48    48     
48     96     
64     48     
-128   0      
96     0      
80     128    
-48    48     
-32    0      
-144   -112   
-160   -32    
16     112    
0      80     
-224   -48    
-32    16     
64     -112   
32     48     
-64    112    
192    176    
-112   80     
32     16     
48     64     
0      48     
-48    96     
-32    144    
144    160    
-160   240    
144    224    
-144   64     
192    256    
-176   144    
48     -16    
144    64     
64     96     
128    64     
-192   -16    
208    176    
-448   -160   
448    32     
-64    96     
-48    0      
144    -64    
48     128    
-64    96     
288    192    
-304   48     
48     96     
96     208    
80     96     
-128   -176   
-16    160    
240    80     
-112   80     
160    160    
-32    144    
160    80     
-48    32     
96     -864   
-16    -64    
16     176    
192    80     
-128   80     
128    80     
48     112    
16     176    
144    80     
16     16     
-48    32     
48     16     
-16    16     
16     128    
128    112    
-96    -160   
144    160    
-32    -256   
80     144    
16     16     
32     96     
-48    -64    
-16    32     
192    144    
-144   48     
48     192    
48     32     
-96    -96    
80     32     
-48    -176   
352    -256   
-176   192    
176    -1200  
144    64     
-112   64     
416    256    
-336   80     
-48    16     
256    80     
80     192    
112    64     
-112   112    
64     0      
48     112    
208    208    
-112   -288   
32     144    
128    -656   
-176   -224   
288    -1264  
144    208    
48     128    
-48    48     
64     32     
96     48     
256    320    
-16    224    
-64    96     
0      -80    
0      32     
-80    -224   
192    160    
-128   -112   
32     48     
112    -1184  
-144   -80    
320    -544   
288    432    
-144   96     
0      -64    
80     208    
128    288    
-64    -320   
-128   -752   
208    112    
272    112    
-64    208    
96     16     
64     64     
432    -800   
-96    608    
-256   192    
192    -16    
48     32     
80     80     
64     96     
-128   0      
224    16     
208    -176   
144    32     
-304   -224   
112    -16    
112    -320   
-48    80     
80     -176   
128    208    
-176   32     
-112   -144   
-32    -128   
-64    -16    
32     32     
-192   96     
176    144    
-192   -128   
320    -48    
80     -128   
320    304    
-192   128    
48     496    
-32    160    
48     80     
-64    -96    
80     32     
16     -48    
256    176    
192    208    
-32    224    
160    336    
240    -256   
336    -112   
-64    -352   
128    -16    
32     -64    
48     256    
-272   -656   
32     0      
-64    -352   
-112   -832   
0      64     
48     -208   
0      144    
-320   -144   
-80    -560   
176    -496   
80     -112   
48     -304   
96     160    
64     -96    
0      64     
80     -160   
16     -1664  
80     48     
0      -304   
-16    -16    
128    -400   
224    -272   
-1040  -48    
-32    -560   
96     -128   
160    1008   
48     32     
-48    -1088  
96     16     
96     320    
-48    -48    
80     -240   
-80    -224   
64     -640   
-208   -208   
112    -192   
16     336    
240    192    
-144   -48    
0      -256   
64     -272   
-16    64     
96     16     
-144   -384   
352    -1792  
-48    288    
176    96     
0      -144   
384    112    
-336   16     
144    16     
224    64     
-352   -64    
64     -16    
-944   -32    
176    -128   
-80    -80    
80     -32    
64     32     
304    -144   
-272   48     
-64    144    
224    80     
-144   -432   
160    64     
-32    192    
16     32     
48     16     
-64    -176   
-336   -16    
0      -160   
-80    -352   
96     96     
0      -32    
80     -1264  
-160   -80    
208    -1152  
-96    80     
144    96     
-48    -288   
96     -176   
-64    -336   
96     -192   
32     -128   
-112   80     
144    48     
-144   64     
64     -240   
48     48     
48     -320   
256    448    
-160   -144   
416    96     
-528   -720   
528    -128   
-528   416    
0      -576   
-80    -160   
80     128    
-112   16     
128    48     
-880   -64    
80     48     
96     208    
-16    -224   
160    -48    
64     272    
112    160    
-96    -160   
192    16     
128    -112   
96     128    
-144   288    
240    176    
-448   -64    
-48    -336   
48     -16    
288    64     
-208   -112   
288    -144   
-160   96     
400    -176   
-480   -272   
-304   -592   
224    -464   
-32    -32    
112    -48    
-144   96     
128    16     
0      80     
-96    32     
32     -32    
-32    -192   
240    176    
64     32     
-96    -32    
-16    -400   
112    48     
-16    160    
-208   128    
0      -48    
-16    -32    
400    624    
16     208    
-96    -32    
336    -112   
-192   -160   
-1024  -48    
-48    32     
-480   -256   
144    64     
-704   32     
64     -80    
64     -272   
-48    -32    
-48    0      
-304   -176   
-32    -96    
112    48     
0      64     
32     -32    
-352   -32    
96     -16    
-176   144    
-48    -64    
320    144    
48     64     
-240   -64    
-160   -96    
0      -176   
160    32     
-144   112    
-400   32     
-768   0      
-16    -48    
192    -176   
320    208    
-528   0      
160    -96    
48     0      
128    48     
272    96     
-736   32     
224    240    
-256   160    
-16    80     
160    112    
-80    128    
-384   -80    
-80    32     
-32    -32    
-64    96     
-96    -160   
144    112    
-16    -128   
-112   16     
-48    -32    
-160   16     
144    -96    
-32    144    
256    112    
-416   -80    
224    0      
-592   64     
0      48     
-1648  -96    
-112   -48    
-96    -272   
-32    80     
160    240    
-416   64     
-80    64     
-96    32     
-64    144    
112    48     
-304   -16    
96     0      
-144   144    
-112   -64    
32     80     
-416   -48    
-48    80     
-48    -64    
16     32     
-112   48     
64     64     
-80    64     
128    128    
-256   64     
128    128    
80     144    
-400   -96    
272    96     
-160   -16    
112    64     
-304   -64    
64     80     
-160   -80    
-304   -1104  
336    -32    
-256   192    
352    560    
-176   -96    
-96    96     
128    64     
0      0      
0      48     
-32    64     
64     -64    
-112   16     
-176   -144   
208    32     
-528   128    
-192   96     
-64    -32    
80     -48    
-176   0      
-144   48     
192    -16    
-112   0      
144    48     
-64    64     
-128   128    
-192   -32    
144    208    
-272   -16    
288    192    
-112   272    
32     208    
-80    176    
-240   -48    
288    16     
-32    -32    
-80    64     
-16    32     
-48    16     
-16    48     
80     208    
48     0      
-16    192    
80     144    
-80    128    
-96    -16    
96     48     
32     192    
32     48     
16     96     
-128   32     
224    176    
-64    96     
-32    144    
-16    32     
144    96     
-80    -32    
64     48     
-16    -16    
-96    96     
-64    48     
176    64     
-80    96     
176    16     
-112   16     
96     16     
-96    64     
16     96     
368    160    
-176   112    
-144   -160   
32     -352   
112    96     
-48    48     
0      -112   
-48    176    
272    640    
32     48     
-112   32     
288    304    
-96    368    
112    160    
192    0      
-144   288    
112    48     
64     208    
-96    128    
32     -16    
0      32     
48     0      
-144   -16    
0      16     
-160   80     
-112   -240   
-64    -208   
64     16     
-32    -16    
-144   -160   
160    192    
-128   256    
80     192    
128    -16    
0      -112   
80     -144   
80     32     
-96    224    
192    80     
96     128    
-48    32     
144    176    
-112   -48    
16     -48    
304    208    
-64    336    
-16    0      
-32    32     
-80    48     
128    -320   
-16    -80    
-128   224    
160    352    
32     112    
160    448    
-32    800    
96     0      
-64    -208   
64     80     
32     336    
0      -96    
256    192    
32     128    
-224   -32    
112    48     
160    -96    
128    0      
16     80     
64     112    
-64    208    
-208   -256   
576    -240   
-304   112    
80     -240   
96     336    
-32    528    
-48    -336   
64     0      
80     192    
-256   -160   
-48    64     
64     -304   
0      -272   
-32    80     
-144   -64    
160    272    
96     400    
-320   -272   
112    144    
112    160    
-48    -224   
-112   320    
-64    -64    
368    112    
-80    224    
-128   -368   
432    -544   
-320   576    
112    -272   
-48    112    
-80    -288   
160    112    
-176   -96    
288    128    
-80    64     
-32    64     
112    80     
-80    -64    
0      -208   
32     -48    
288    448    
0      144    
304    96     
144    -624   
-128   576    
128    32     
-64    -288   
16     -240   
192    224    
-160   128    
-16    -80    
64     -288   
-112   -224   
176    368    
80     384    
80     -16    
-64    -64    
48     160    
208    -192   
-256   224    
144    -528   
-176   128    
176    -224   
112    528    
-16    384    
32     -400   
-48    -144   
64     -144   
80     64     
144    -192   
-176   96     
48     -160   
16     96     
-16    -352   
32     64     
32     80     
80     48     
-16    48     
64     64     
224    32     
-128   240    
80     48     
352    272    
80     608    
-144   -896   
224    336    
64     320    
-240   -336   
272    -432   
-16    304    
16     160    
272    160    
-128   448    
96     416    
-32    -464   
-32    -112   
96     160    
64     -48    
176    544    
-48    -48    
32     -208   
16     -272   
48     240    
-144   -240   
112    240    
-96    -544   
96     -304   
-32    112    
32     -400   
-112   -192   
-144   -576   
176    336    
-16    -80    
-32    -704   
176    -448   
-48    32     
352    320    
-240   -256   
256    -80    
160    -896   
-160   80     
224    -256   
400    624    
-80    560    
64     -80    
-432   -224   
-64    -496   
160    -240   
-240   -400   
128    64     
-80    -32    
256    400    
48     416    
-48    32     
96     -288   
112    -32    
48     -144   
-64    32     
-64    32     
144    -208   
-496   -240   
224    -80    
144    16     
-48    -48    
160    -32    
-16    -736   
48     -256   
96     -3088  
64     -112   
-32    -160   
112    0      
240    64     
240    320    
-480   -96    
336    16     
-96    -32    
128    48     
-1168  16     
256    112    
-160   -144   
-32    -224   
16     -144   
288    -48    
-64    16     
64     -96    
144    128    
0      -144   
-16    32     
48     64     
16     -80    
80     128    
352    -80    
-784   -496   
224    -352   
176    96     
-176   -176   
320    96     
64     -256   
16     160    
32     -1888  
-48    -112   
144    -240   
304    96     
-32    -16    
144    80     
-464   0      
0      -16    
-544   -64    
128    240    
-272   112    
-304   288    
176    256    
96     -192   
64     112    
144    -1600  
-64    -80    
192    -80    
128    -96    
-16    16     
208    -32    
-160   -48    
160    -80    
64     112    
48     -96    
16     160    
-32    0      
-1040  160    
80     -16    
-112   80     
-16    -288   
272    208    
-64    16     
112    128    
176    64     
240    -160   
-96    -128   
160    -64    
-64    176    
128    64     
-128   64     
80     -208   
-64    -144   
160    -80    
32     128    
96     -176   
64     16     
-512   0      
224    32     
-432   16     
256    208    
-80    -320   
224    -224   
-32    112    
192    -160   
-256   -48    
112    -80    
96     32     
-32    -208   
0      0      
304    -304   
-624   80     
-48    -16    
48     0      
-224   64     
-32    -16    
-160   -16    
224    32     
32     96     
16     80     
-144   -32    
-112   -144   
288    160    
-912   -176   
96     128    
-1008  -144   
-368   -64    
80     32     
-304   -112   
-32    48     
-1296  -96    
-192   -416   
64     -112   
48     128    
0      0      
-48    0      
-144   -176   
48     96     
-112   -272   
208    176    
-64    96     
48     -16    
-96    -176   
-144   32     
-112   112    
-576   -32    
-112   64     
-800   128    
-160   176    
144    16     
-272   -304   
-112   -384   
80     96     
-64    -48    
32     48     
144    16     
32     112    
64     512    
-144   96     
-32    -144   
0      16     
128    -32    
144    144    
-96    -80    
-336   48     
48     -64    
-32    -96    
288    256    
-352   240    
-16    240    
-64    -16    
-64    80     
-112   -304   
-32    32     
224    752    
-112   400    
-96    112    
-256   224    
-64    304    
-336   32     
224    224    
-144   112    
192    448    
-80    -64    
-112   64     
-48    -128   
-16    112    
144    64     
-80    64     
48     96     
-368   -144   
-128   -608   
-128   176    
80     336    
-144   80     
-64    32     
0      -144   
-32    64     
32     256    
80     352    
-48    80     
-112   -400   
240    -144   
16     592    
112    -224   
-112   784    
16     16     
112    -448   
-64    64     
80     -736   
224    752    
-224   -240   
64     160    
144    128    
0      16     
-80    -208   
160    80     
-256   128    
16     -528   
-16    -272   
304    768    
-128   -32    
-32    -240   
16     64     
-320   -112   
64     -64    
-1168  -272   
208    368    
-256   -272   
304    320    
-448   -144   
-16    112    
80     256    
-80    -80    
96     160    
64     192    
-64    160    
-64    16     
-400   -272   
-16    -288   
160    112    
-224   32     
-32    144    
-32    176    
112    -64    
96     1072   
128    128    
80     -800   
288    144    
-32    112    
-384   -688   
-128   -640   
-48    304    
96     800    
-64    32     
-112   -144   
256    -80    
-192   64     
-64    16     
32     -64    
-112   256    
480    432    
-352   144    
-208   0      
112    288    
-272   -112   
304    976    
-80    192    
-304   -384   
16     -416   
96     672    
-128   272    
-96    -96    
32     128    
16     -112   
-128   128    
416    160    
-288   112    
-80    -464   
176    624    
-304   16     
128    -160   
-64    208    
272    144    
-240   -320   
-48    -144   
80     80     
80     112    
64     464    
-304   64     
400    -304   
-80    240    
0      -96    
208    80     
-32    -16    
-64    -16    
224    -96    
-176   432    
48     -16    
-144   -48    
80     112    
128    96     
0      96     
-16    -112   
160    80     
-144   -96    
160    544    
-48    64     
-112   -944   
368    -1088  
96     928    
-192   -48    
16     160    
128    384    
-320   -320   
208    688    
96     -688   
96     336    
-112   464    
-64    -288   
-32    32     
16     -48    
32     -16    
-16    208    
-48    208    
144    0      
128    560    
-48    -144   
208    128    
-80    -176   
32     80     
0      160    
-160   64     
256    464    
-64    64     
-48    80     
16     32     
-48    48     
-96    32     
48     64     
80     16     
64     80     
0      80     
384    240    
-384   -208   
48     -1360  
144    32     
-160   -656   
272    288    
-64    -192   
32     -80    
96     -128   
-144   -304   
240    -128   
-64    48     
-48    -80    
-96    -432   
80     208    
48     -432   
-96    64     
112    -720   
-80    128    
176    80     
16     -96    
0      -160   
112    -32    
160    48     
-32    400    
96     64     
112    208    
-144   32     
32     144    
-64    -240   
112    -304   
96     96     
-176   -528   
80     80     
128    -240   
-240   16     
176    32     
-112   112    
0      -144   
64     -48    
-16    -32    
0      32     
144    48     
64     32     
32     64     
144    144    
144    112    
-160   -96    
224    64     
-224   -464   
80     80     
-80    -368   
544    -272   
-144   -64    
448    480    
-320   16     
96     96     
160    32     
-96    176    
128    176    
-128   -128   
64     -16    
-16    -432   
176    48     
32     -128   
64     64     
160    -288   
80     16     
-96    -48    
64     128    
-144   32     
16     32     
32     32     
-128   -160   
320    224    
-192   -80    
48     48     
272    -224   
-32    144    
208    -64    
-208   -128   
272    -160   
-144   64     
-16    -80    
192    144    
80     -48    
128    48     
128    96     
112    -112   
-32    -96    
48     -272   
-32    -176   
112    80     
176    192    
480    640    
-416   512    
32     272    
96     288    
-144   128    
144    160    
-176   -32    
-128   -336   
-304   16     
-96    144    
-256   128    
-16    48     
-416   0      
-64    -80    
-80    96     
-48    -272   
-32    -160   
64     -304   
368    -736   
0      32     
128    -160   
0      160    
-144   -32    
64     32     
48     -32    
32     48     
160    -16    
-240   288    
64     -32    
256    208    
48     48     
0      48     
160    144    
192    -992   
64     112    
-160   -208   
304    -400   
-240   0      
0      -176   
256    0      
-80    -448   
336    -48    
-48    -1312  
80     0      
32     112    
-112   112    
192    0      
-80    96     
-64    -128   
-144   0      
224    -64    
128    -64    
-240   -80    
128    -224   
-176   -240   
256    0      
112    16     
-48    -96    
480    448    
-544   -576   
80     -240   
80     48     
16     48     
32     -16    
-80    64     
80     -32    
-144   -48    
-304   -96    
80     -16    
-208   0      
80     32     
-48    32     
48     -48    
-32    -80    
64     -16    
288    80     
128    -64    
-176   48     
32     -96    
48     16     
-16    48     
80     16     
-128   32     
80     -16    
48     80     
-80    -112   
96     -112   
144    -144   
-496   80     
-48    -272   
48     -64    
96     -656   
0      128    
240    32     
-176   -192   
48     48     
-80    -224   
-48    32     
112    -48    
-496   0      
160    -128   
-368   80     
-304   -208   
176    -192   
-48    -688   
16     16     
96     -688   
-176   0      
272    272    
256    688    
-160   320    
160    272    
-112   80     
32     -96    
-752   -16    
0      240    
48     176    
80     272    
160    368    
-64    -672   
32     48     
160    -272   
-48    -224   
80     -80    
96     432    
-304   -64    
128    -272   
-288   32     
176    -80    
-64    336    
-144   176    
64     16     
144    832    
-208   208    
192    -464   
-336   -96    
-48    -688   
16     448    
-64    368    
-176   -160   
-352   -16    
-32    16     
-96    -96    
-64    32     
16     -16    
80     0      
-256   0      
384    320    
-384   256    
-192   -288   
64     32     
80     -160   
-96    80     
-96    48     
-128   -16    
96     32     
0      48     
-224   -80    
352    -288   
-304   -160   
96     0      
-256   96     
128    80     
128    176    
-224   240    
144    112    
-384   -240   
-96    -16    
-176   208    
-48    -160   
-80    16     
-208   96     
672    528    
-352   608    
-128   240    
-16    144    
-128   352    
704    256    
-128   416    
-192   -64    
128    48     
-304   64     
-160   -64    
-336   176    
160    -192   
48     256    
64     224    
-208   32     
-1424  -96    
128    -16    
288    -48    
-240   32     
160    -80    
-240   176    
160    -656   
16     -128   
-272   -432   
-80    -464   
96     48     
-80    48     
-320   288    
32     0      
-80    -96    
-176   -64    
256    -160   
112    384    
-192   352    
-176   -32    
96     208    
-336   -256   
-336   -176   
0      -32    
16     96     
-352   -16    
-496   -32    
144    64     
-80    64     
-272   -240   
-48    -128   
-96    240    
-784   -272   
16     432    
176    -224   
32     224    
80     416    
-128   -112   
-304   -704   
-240   -1072  
96     432    
-208   256    
-32    32     
176    192    
-48    544    
80     208    
-208   64     
-208   48     
208    1440   
-432   -96    
464    -720   
0      336    
-16    -48    
-80    -384   
-160   -96    
-64    -32    
16     96     
-112   -528   
-160   -80    
352    288    
-80    544    
144    -16    
-208   -320   
240    592    
-672   416    
-336   -256   
32     -352   
-16    176    
48     384    
48     320    
-32    32     
-48    -64    
-32    -128   
16     -64    
208    -448   
-32    -256   
112    208    
-224   -320   
112    0      
-720   384    
-64    288    
48     -16    
112    16     
64     -32    
288    240    
-96    512    
48     176    
144    256    
-48    192    
-128   -416   
-96    -80    
240    32     
-304   96     
336    128    
-288   128    
-64    480    
-96    -240   
16     16     
96     112    
-64    128    
0      48     
-48    16     
224    192    
-48    224    
-16    32     
160    320    
-144   432    
96     112    
-144   32     
176    80     
64     224    
-48    96     
-32    -192   
-64    96     
96     -48    
-144   48     
240    -48    
-256   -16    
-32    48     
-32    160    
-112   32     
-64    16     
0      64     
-96    -240   
-64    -64    
16     64     
-64    32     
-176   -128   
240    -16    
-96    80     
32     64     
0      112    
-80    -48    
-80    48     
-128   -208   
-64    -272   
224    16     
-176   272    
64     64     
96     16     
16     128    
224    160    
-96    128    
0      48     
128    96     
-144   288    
-32    96     
-32    32     
64     32     
0      112    
128    16     
0      80     
-32    16     
16     80     
320    32     
-208   96     
48     0      
-32    -48    
48     64     
16     32     
16     48     
0      64     
128    48     
-32    64     
32     -64    
-160   -48    
192    240    
96     192    
-16    -48    
16     -32    
-48    16     
-32    -128   
160    0      
144    176    
-16    192    
32     16     
-48    48     
48     48     
-16    144    
208    240    
-368   -224   
208    48     
80     96     
-240   96     
48     -48    
-144   -112   
256    64     
-160   208    
48     32     
-128   32     
32     128    
-144   0      
416    272    
-256   224    
-80    368    
-160   -176   
208    -32    
-64    -64    
48     -992   
16     112    
-48    176    
0      96     
48     32     
112    0      
-160   0      
16     -32    
-176   -240   
256    -288   
64     -48    
192    256    
-48    0      
48     -528   
-32    -128   
224    -528   
32     288    
16     64     
16     64     
224    192    
-80    32     
-16    96     
240    96     
-144   -176   
48     -112   
-80    48     
176    32     
-128   -96    
272    -96    
32     16     
16     64     
288    128    
-16    80     
144    160    
144    80     
-80    16     
144    96     
-16    0      
64     96     
144    64     
64     96     
-64    -64    
-80    80     
0      -96    
96     0      
96     -32    
80     48     
96     -80    
224    240    
-288   -336   
64     160    
288    80     
64     64     
-64    16     
80     -96    
80     112    
192    -32    
96     112    
0      0      
32     96     
48     -224   
64     160    
32     -912   
16     112    
-16    -448   
48     80     
64     224    
-128   144    
-96    -112   
112    144    
112    80     
-16    -16    
272    208    
-224   -80    
192    176    
192    -400   
-96    16     
80     -176   
160    112    
-32    -288   
176    32     
-96    -48    
192    112    
-80    48     
16     -32    
96     192    
16     -352   
128    160    
112    -352   
-16    112    
16     -112   
144    80     
32     -96    
0      -128   
0      -272   
400    448    
16     960    
-176   320    
224    -672   
160    688    
0      80     
48     -320   
16     256    
128    -112   
16     96     
16     -48    
0      32     
128    -336   
16     96     
-16    -112   
64     112    
64     48     
-96    -784   
0      -720   
112    80     
-336   -1040  
224    496    
80     -544   
-32    192    
16     224    
-32    -160   
64     16     
48     16     
96     416    
-64    -192   
320    -176   
-352   -48    
256    -1200  
96     -288   
-96    160    
-16    -96    
-64    -96    
176    -160   
64     -32    
80     -1056  
-32    -192   
112    80     
128    352    
-16    -464   
48     -96    
64     -224   
0      -48    
192    -160   
128    -224   
-224   384    
144    -128   
-64    64     
48     -288   
-160   -352   
208    -624   
-112   -16    
176    -1216  
16     96     
80     -64    
48     -32    
320    -16    
-320   32     
144    -32    
-32    112    
-48    -96    
-16    -32    
-1168  -32    
32     0      
48     -48    
336    144    
-432   -160   
48     -368   
-208   -240   
224    -384   
160    176    
16     16     
112    256    
80     240    
80     208    
432    368    
-304   64     
-448   64     
112    -112   
-224   -144   
144    -288   
-80    -16    
304    160    
-32    128    
-16    -1264  
592    208    
-400   0      
128    -224   
-80    -112   
0      -128   
-320   -400   
96     16     
336    240    
-496   112    
-944   -128   
-64    0      
-352   -640   
80     -544   
128    368    
32     -336   
48     208    
-16    -128   
-80    -144   
-48    144    
544    688    
-576   144    
112    -64    
224    -128   
160    0      
-352   -32    
32     -96    
-224   -16    
112    288    
-128   -336   
-128   -864   
-112   -112   
-48    944    
208    -352   
-48    64     
112    208    
0      64     
-80    -256   
544    496    
-16    640    
-80    144    
192    -112   
-48    128    
304    -32    
-336   -640   
304    -768   
352    224    
-400   -48    
240    -32    
-400   -512   
-208   -816   
-112   -336   
-160   -112   
-80    -64    
-16    128    
208    176    
-48    208    
-464   -160   
112    -288   
64     -80    
112    -192   
304    96     
32     0      
-80    -48    
-208   -32    
48     -32    
-336   -160   
320    -80    
176    16     
-16    0      
16     -112   
80     -96    
-64    160    
-592   224    
160    208    
-592   -192   
-544   -176   
160    80     
-128   160    
-288   208    
-240   224    
80     -80    
32     -272   
48     80     
112    -48    
-240   48     
-272   -16    
-304   -112   
192    -128   
144    176    
-256   -288   
96     48     
32     80     
-160   96     
-96    -16    
-32    16     
-128   -112   
-736   32     
-16    96     
0      -80    
-192   -16    
0      -160   
64     80     
48     -112   
-16    -16    
-16    -32    
32     48     
-48    48     
0      16     
-192   32     
0      0      
-80    16     
-112   -240   
-64    96     
336    128    
64     16     
-80    -80    
80     96     
-288   208    
160    128    
-80    16     
96     352    
-48    160    
-32    80     
96     80     
-32    64     
-96    112    
-48    224    
-112   112    
-160   48     
128    16     
-128   -96    
80     144    
-80    16     
-48    -192   
-96    -128   
32     -64    
-128   -32    
0      112    
160    48     
-176   32     
192    256    
-96    48     
-176   -16    
-464   -176   
-48    32     
-96    -80    
0      128    
144    80     
0      -96    
-32    -32    
-192   48     
-48    16     
64     128    
-48    -32    
112    32     
-96    128    
-80    -16    
-112   96     
-192   -80    
64     32     
-784   -16    
256    -32    
-64    96     
-48    32     
16     0      
-224   16     
80     32     
48     64     
-128   -128   
272    -176   
-192   96     
32     0      
128    64     
-160   64     
16     -32    
-272   -96    
-32    -16    
0      128    
0      112    
-48    32     
80     -112   
-16    0      
32     144    
-32    -32    
-32    -32    
32     128    
-144   112    
32     176    
-128   -48    
16     96     
-176   -16    
0      0      
112    48     
-16    144    
32     -16    
0      48     
160    176    
-96    32     
160    96     
80     112    
112    48     
-48    112    
144    128    
-320   -64    
320    368    
-240   320    
-176   -16    
128    96     
80     48     
-96    -176   
32     112    
0      16     
-176   32     
32     64     
-32    -16    
-16    128    
0      144    
-176   16     
-48    112    
160    96     
-64    80     
160    112    
32     64     
-48    -80    
64     -128   
-64    128    
144    96     
48     -80    
128    288    
-336   16     
16     32     
-80    96     
16     112    
-160   0      
48     -32    
0      112    
176    224    
-208   32     
0      16     
240    96     
-32    80     
80     64     
0      0      
48     160    
-48    -16    
16     48     
64     80     
32     96     
112    -192   
-144   176    
48     96     
-176   64     
-16    32     
96     48     
-80    240    
128    -64    
-144   -192   
64     -64    
80     48     
-128   -32    
368    336    
-544   96     
16     48     
-144   -48    
368    -96    
80     176    
-16    48     
144    -16    
-160   64     
112    112    
-16    160    
112    112    
-256   16     
-48    112    
96     176    
-160   80     
80     -80    
96     32     
32     -96    
-80    144    
320    224    
-48    176    
192    128    
-208   -112   
160    144    
32     16     
272    160    
0      112    
-64    112    
-176   -208   
448    -480   
-16    160    
48     -80    
160    -160   
288    -656   
-16    128    
-176   272    
64     -160   
0      400    
32     48     
128    96     
16     48     
-32    -64    
16     -48    
0      -128   
-64    -128   
0      -64    
416    352    
-192   624    
32     -1200  
224    -160   
-192   16     
-16    64     
304    112    
-48    48     
64     48     
0      96     
-32    -80    
64     64     
-64    -16    
112    96     
48     128    
176    -144   
32     -176   
-48    -1072  
240    224    
128    -320   
16     -32    
80     80     
96     -80    
48     -256   
64     64     
-32    208    
144    128    
-80    16     
-16    80     
240    144    
128    496    
-96    336    
-288   -304   
96     -96    
64     -64    
64     128    
-48    -128   
64     64     
128    -32    
-96    -32    
80     -64    
16     112    
32     64     
0      -80    
48     112    
-32    -112   
96     240    
80     -224   
-64    -576   
-288   -1744  
208    -160   
-240   -1616  
-160   -416   
240    -32    
-48    272    
0      -16    
32     96     
-48    0      
0      -224   
32     -256   
144    128    
112    80     
80     -112   
32     144    
64     -96    
-80    80     
160    -144   
-96    -64    
-112   -368   
112    -272   
-16    240    
224    64     
-32    112    
192    -80    
-80    80     
16     -464   
160    32     
-144   -112   
96     528    
224    704    
-352   -48    
176    -512   
128    -16    
80     240    
-32    256    
64     -208   
192    -64    
-160   64     
208    -352   
-80    -320   
176    160    
192    16     
-96    128    
192    -64    
0      32     
-144   -256   
336    -320   
32     304    
-64    160    
-112   -1792  
112    -944   
272    -64    
16     -512   
144    -224   
96     128    
208    240    
-48    160    
96     -464   
160    -320   
128    -320   
96     -1360  
0      0      
48     -880   
-16    32     
-144   -160   
-64    144    
-816   -48    
-144   -944   
176    -448   
-16    -256   
176    -48    
128    -400   
112    0      
-144   176    
144    112    
-112   -192   
-80    48     
112    16     
-160   -80    
384    192    
-272   -96    
-480   -112   
-16    -80    
-16    144    
176    -128   
192    -16    
-224   16     
-112   -384   
-336   -960   
96     -112   
0      16     
-176   96     
-64    -144   
-48    -48    
176    0      
-16    48     
-208   160    
-96    64     
-112   384    
-16    -16    
336    -64    
-112   -240   
208    16     
160    -176   
-16    -112   
176    -16    
64     64     
80     -144   
16     48     
-64    48     
208    48     
112    144    
-32    -192   
-128   -32    
304    -144   
-144   160    
32     -128   
288    64     
16     -160   
80     -32    
80     -624   
-32    32     
-64    -112   
192    -48    
144    368    
-112   80     
-208   -48    
144    -400   
-160   -32    
272    -16    
-1024  0      
96     -64    
-80    0      
32     -240   
80     128    
112    -1312  
-96    48     
208    48     
-16    -32    
-80    0      
32     -256   
-128   0      
176    96     
-48    48     
0      0      
16     208    
144    16     
48     -80    
16     48     
240    64     
96     -48    
-176   80     
128    64     
-96    -144   
48     -16    
64     -32    
-64    336    
464    64     
-512   0      
224    -128   
-256   32     
64     -64    
192    144    
-176   -64    
96     32     
-96    -384   
224    48     
-96    -48    
96     96     
-240   80     
-32    0      
96     -16    
0      -32    
-48    -16    
64     -176   
-96    16     
0      -128   
-112   -224   
64     -64    
208    32     
144    -128   
16     -96    
32     112    
240    -64    
-240   96     
16     -64    
-32    80     
64     -48    
-48    -32    
80     64     
224    192    
-80    48     
-32    144    
-1312  -96    
432    464    
-1040  -32    
-624   -384   
272    -144   
-208   112    
48     112    
-832   -128   
16     96     
48     -48    
-144   96     
176    160    
-80    0      
-240   -224   
-208   48     
192    -144   
16     128    
-16    32     
-80    16     
-208   16     
32     16     
-160   -48    
-64    -32    
-256   192    
-464   -160   
32     64     
-48    -96    
-112   0      
-320   -256   
80     112    
64     -32    
0      96     
288    144    
-432   16     
32     -16    
176    32     
-80    48     
48     16     
-48    16     
-112   0      
-48    64     
32     -64    
160    64     
144    224    
-128   80     
16     -48    
-16    64     
64     16     
-64    32     
-64    80     
80     16     
-16    112    
-208   -176   
-96    -16    
-432   -16    
0      80     
-960   -80    
96     112    
-64    -128   
144    48     
0      -64    
96     16     
-112   64     
512    496    
-448   336    
-32    -16    
-112   -176   
-48    0      
0      -80    
-240   128    
64     144    
-336   64     
128    32     
-144   -112   
256    176    
-608   -512   
192    -528   
208    96     
112    256    
-80    0      
16     -32    
48     80     
16     16     
-96    -160   
96     144    
48     128    
-336   16     
80     -32    
-496   -128   
112    64     
112    160    
-16    32     
-32    16     
272    560    
400    368    
-336   48     
0      48     
96     -32    
48     128    
-176   224    
-128   176    
-288   48     
288    -16    
-336   -176   
240    -304   
304    80     
-240   -16    
0      64     
32     240    
48     176    
-160   16     
-160   0      
-64    -112   
-176   -64    
-256   -48    
112    144    
-64    -112   
368    -16    
-256   -32    
-96    400    
304    -336   
224    1008   
-304   144    
192    -96    
64     112    
128    64     
-48    176    
-112   288    
144    -176   
-64    176    
-32    -480   
-112   -208   
192    288    
-144   -128   
-48    -176   
224    224    
-208   224    
112    48     
192    720    
80     288    
-336   -208   
304    272    
-192   -80    
-80    -144   
16     -80    
32     144    
-96    32     
64     432    
96     176    
-80    64     
192    112    
0      240    
-32    752    
96     512    
16     64     
-288   80     
192    128    
-16    32     
-48    80     
-128   -80    
160    112    
-32    0      
-16    96     
160    80     
0      80     
0      64     
16     64     
-160   -48    
288    -208   
0      304    
48     -96    
192    -128   
-48    -48    
208    144    
-288   192    
48     160    
-48    128    
-160   -128   
32     -240   
112    0      
144    96     
-144   -32    
128    160    
192    112    
-208   -64    
160    -32    
112    128    
-128   48     
-16    96     
-80    32     
80     64     
-16    0      
-48    224    
0      112    
0      -32    
48     0      
-48    112    
96     16     
-112   -16    
-16    -304   
0      -64    
256    832    
48     384    
-128   208    
16     80     
48     48     
-64    0      
-32    96     
128    96     
-16    64     
-208   -336   
64     -80    
48     112    
-32    16     
16     80     
0      80     
160    160    
16     64     
-32    64     
-272   -672   
-48    -960   
320    288    
-256   608    
192    -608   
-48    -528   
-32    640    
80     -688   
112    0      
-208   -432   
144    -752   
352    384    
-80    304    
64     -224   
192    112    
-256   64     
-160   -384   
128    -48    
32     64     
16     48     
48     -32    
-112   -272   
0      -80    
112    -400   
0      32     
112    272    
128    352    
288    624    
-192   176    
48     96     
-160   -272   
48     -160   
-176   -656   
-208   -432   
352    112    
-240   -784   
48     176    
-32    96     
176    160    
-64    -128   
368    128    
-528   -464   
32     -176   
176    32     
-48    192    
-48    -32    
80     112    
256    112    
-64    -272   
96     -16    
-272   -704   
176    192    
0      -240   
-160   64     
16     -192   
96     160    
-112   0      
64     128    
-336   -80    
496    32     
-96    128    
144    -240   
-128   -48    
80     -112   
-16    0      
-80    0      
112    128    
176    -496   
-480   96     
224    -32    
96     352    
48     -112   
32     176    
256    32     
-128   -192   
208    80     
-16    -176   
288    48     
144    -240   
64     80     
48     -480   
-176   -128   
320    -160   
96     144    
-112   48     
80     0      
144    272    
208    48     
80     192    
-144   -272   
32     0      
48     -96    
160    112    
-16    -160   
48     -16    
80     16     
-16    48     
-64    -48    
208    112    
-112   16     
240    160    
-272   112    
32     64     
64     176    
144    -96    
-96    80     
176    16     
-48    80     
-32    -160   
256    112    
144    -32    
-32    0      
224    -48    
64     112    
48     48     
48     -384   
80     128    
-752   32     
-16    -176   
0      16     
112    -576   
160    32     
-272   32     
176    -48    
48     112    
144    0      
48     64     
80     -272   
32     -384   
240    400    
-240   -48    
144    64     
-16    80     
112    -176   
0      -96    
-16    -1040  
16     -48    
176    -496   
144    64     
-32    -96    
-128   80     
496    16     
-352   -16    
64     -160   
64     352    
-352   144    
240    16     
-16    -208   
-80    -144   
176    -128   
80     -464   
80     -96    
64     -480   
0      32     
48     -2736  
-16    0      
256    -112   
-256   0      
336    256    
-256   80     
256    80     
-96    -32    
-304   -32    
192    0      
-688   0      
128    0      
-80    96     
0      64     
80     64     
32     -432   
288    16     
112    -64    
80     64     
160    -16    
-16    64     
-80    0      
96     -80    
0      64     
304    64     
-368   0      
192    -128   
160    16     
32     -336   
96     -16    
-144   -240   
176    48     
-16    -1408  
64     32     
128    16     
-32    112    
32     32     
-16    16     
112    64     
-256   -80    
-384   0      
160    -112   
-1136  -80    
336    -64    
-256   16     
208    -160   
96     32     
-32    -416   
144    224    
-96    64     
80     -112   
144    -32    
-32    -32    
-192   -48    
128    -176   
-192   -64    
-48    -32    
-384   144    
-16    64     
-224   -32    
192    -208   
0      64     
-96    -336   
112    128    
-48    -176   
240    240    
-256   128    
-192   -912   
-544   -384   
320    192    
-128   -32    
-112   -176   
-96    32     
128    128    
-336   128    
-48    -256   
128    -16    
224    0      
32     48     
64     -16    
-16    -272   
-672   -128   
128    -16    
-208   -16    
160    48     
-608   -528   
256    -496   
-224   128    
-80    -64    
-464   -112   
144    -352   
112    80     
-176   -672   
224    -384   
128    -112   
-192   -496   
-208   -192   
176    -128   
-80    32     
-16    272    
-272   -112   
-64    688    
176    640    
48     208    
-304   32     
144    -80    
-112   64     
-1136  -80    
-704   -16    
288    240    
-592   16     
0      176    
-832   -176   
96     -176   
-112   48     
16     48     
-64    -80    
144    48     
-208   -320   
144    64     
-528   -32    
96     -640   
352    -464   
-144   480    
16     -320   
-288   -48    
0      192    
-528   -64    
-192   0      
-1072  0      
-288   96     
144    -240   
272    -48    
-272   64     
-16    160    
112    -96    
-144   80     
64     -272   
352    112    
-176   192    
-144   64     
112    0      
-96    -32    
-224   80     
96     80     
-112   64     
-688   -64    
96     112    
-80    96     
16     64     
-80    0      
128    -144   
208    352    
-96    560    
-112   -48    
0      -352   
0      -272   
0      -64    
64     112    
-144   304    
80     784    
-1264  80     
48     -64    
-304   -320   
80     -176   
-64    80     
-80    -336   
-128   -416   
-32    -112   
64     -48    
-32    256    
0      240    
16     400    
-96    256    
-160   32     
32     16     
-608   -64    
288    208    
-16    -96    
-96    112    
0      -240   
-80    32     
-16    0      
80     96     
32     80     
16     48     
-64    -16    
-64    64     
-304   80     
304    64     
-16    96     
-272   -64    
144    192    
160    496    
96     256    
16     96     
-96    64     
-32    -288   
-48    -464   
208    -336   
-160   -64    
368    288    
-192   -256   
16     -64    
80     -16    
-80    64     
-48    -32    
-32    176    
-688   64     
-160   -80    
-16    80     
-112   128    
-96    -464   
-144   -736   
-16    -240   
112    336    
-128   192    
144    48     
48     352    
-368   -192   
-112   -944   
-160   -880   
96     48     
-304   672    
-64    -96    
32     16     
192    80     
-64    16     
-112   -48    
256    -32    
-16    336    
288    -16    
-304   720    
96     -384   
-272   16     
0      64     
-80    -16    
0      -176   
96     96     
80     224    
-32    -16    
-64    -32    
80     208    
16     400    
192    -256   
-176   -224   
-80    -416   
48     -96    
80     160    
-48    32     
304    256    
176    128    
-48    -80    
32     -48    
80     64     
-96    64     
-32    96     
-160   -80    
32     80     
-32    176    
-240   -272   
448    32     
-320   112    
128    -240   
-48    -64    
144    0      
-256   -256   
96     32     
-32    128    
144    320    
-48    288    
-32    -48    
112    -64    
-48    160    
-16    -32    
-80    -192   
240    48     
48     48     
48     80     
-32    48     
128    32     
208    496    
-144   528    
-128   16     
48     0      
96     96     
96     64     
-240   128    
-96    112    
80     32     
-64    16     
208    112    
-96    96     
0      32     
-112   48     
96     80     
-176   -192   
0      176    
368    368    
-448   0      
-128   -16    
-32    -128   
64     -48    
-48    -32    
112    224    
144    -96    
-128   32     
0      0      
-128   80     
112    0      
64     80     
-352   -96    
128    -64    
48     80     
-352   -16    
16     64     
-160   0      
144    128    
256    160    
-96    64     
-48    16     
272    224    
-352   -32    
-32    192    
64     48     
0      -144   
80     -96    
-192   -1088  
160    -48    
-208   -80    
80     -96    
208    0      
128    144    
16     64     
-48    128    
-96    0      
32     112    
-48    -64    
32     96     
-240   -48    
192    -128   
32     0      
96     -784   
-80    80     
48     64     
16     -16    
-48    0      
160    0      
-112   176    
224    80     
-176   -80    
272    144    
-112   0      
112    128    
160    112    
0      -176   
160    320    
-336   -368   
208    48     
192    -1360  
-128   -288   
176    80     
32     112    
112    48     
0      128    
112    0      
-32    32     
80     128    
48     80     
192    96     
-176   0      
208    352    
48     -80    
-80    0      
176    -720   
128    112    
32     -16    
96     128    
-112   -48    
208    -96    
160    96     
-32    128    
-32    48     
112    96     
-80    -96    
176    -144   
-48    64     
192    -320   
16     0      
-32    -512   
272    144    
-64    -448   
-32    128    
80     0      
-80    112    
128    80     
-48    224    
0      176    
16     -16    
96     0      
240    -144   
0      112    
-16    -64    
48     48     
64     -16    
16     96     
64     -336   
80     112    
-16    -32    
64     32     
16     16     
-16    96     
-16    64     
0      48     
80     96     
112    -176   
-144   80     
48     112    
144    112    
16     -160   
128    0      
-32    -320   
208    80     
0      64     
112    176    
-80    112    
128    320    
-192   128    
240    -96    
80     16     
-112   -144   
176    -80    
112    -32    
-128   -352   
256    -112   
-96    240    
256    0      
-80    384    
-16    -32    
16     -1856  
-16    -64    
144    -192   
64     -176   
176    64     
-80    112    
192    256    
-160   -80    
272    80     
-176   240    
0      -368   
80     192    
32     160    
160    -912   
32     64     
96     -624   
32     32     
-352   -48    
48     16     
80     -96    
80     -64    
-128   -432   
320    -928   
-48    320    
128    256    
-224   -848   
128    384    
-112   144    
160    144    
-80    -80    
-176   -416   
176    192    
-224   -16    
32     -80    
16     -240   
96     16     
-48    -240   
-112   -528   
80     224    
80     -448   
-16    -112   
48     -240   
224    -16    
128    144    
480    816    
-192   256    
48     -432   
112    -48    
192    592    
32     -64    
-48    -160   
336    -32    
-160   -160   
128    64     
-48    -64    
176    -96    
-96    -208   
-32    -160   
416    32     
-208   -240   
-64    -16    
96     -64    
-128   -96    
224    -304   
208    512    
240    704    
96     576    
64     -496   
256    -128   
416    -192   
208    160    
96     64     
288    32     
-64    112    
112    -112   
-160   -48    
256    -128   
112    -128   
192    576    
-592   -112   
48     -800   
-576   320    
128    -544   
-208   -144   
112    -128   
16     480    
-80    -448   
-80    -496   
352    272    
-128   416    
-48    -448   
64     -48    
64     416    
192    96     
-352   16     
240    48     
-352   16     
-32    -48    
-176   32     
624    -144   
-352   64     
144    -416   
48     16     
16     -64    
-48    -160   
192    -64    
80     320    
32     576    
-256   -256   
-224   -672   
240    80     
0      336    
224    224    
-32    240    
-48    -272   
-16    -208   
528    -320   
16     784    
-176   -208   
-16    -784   
-208   400    
48     -208   
-160   -16    
224    160    
-352   -496   
336    336    
-224   752    
400    272    
-304   -800   
-32    -800   
288    688    
-32    304    
16     48     
160    96     
32     80     
-304   -16    
-16    -32    
0      -16    
-16    64     
-48    48     
48     16     
-80    -32    
16     -80    
-224   -48    
-16    16     
-32    0      
-384   -416   
-960   224    
-208   96     
-432   -144   
-16    16     
-320   208    
32     208    
-48    176    
0      320    
64     -544   
-112   32     
0      -64    
272    96     
16     -16    
16     -16    
-144   -240   
-208   16     
-160   -144   
-224   -64    
144    320    
48     160    
-144   176    
-1008  -16    
-112   128    
48     -224   
-192   -272   
-112   -496   
160    176    
128    496    
-240   144    
64     496    
-48    16     
-80    -32    
32     -208   
-192   -208   
-32    -64    
-96    112    
-192   208    
-144   -80    
-32    272    
-144   -80    
48     -624   
16     -400   
64     -160   
-16    80     
-112   -112   
144    112    
-144   176    
-144   128    
-32    -48    
-224   16     
64     224    
-208   -48    
0      -16    
-384   -128   
-32    -80    
80     -96    
0      96     
80     -32    
-112   -80    
208    -48    
160    352    
-336   144    
80     -64    
-48    144    
96     64     
-208   48     
16     112    
-144   176    
-208   -112   
0      176    
-272   -48    
368    32     
-160   80     
48     -16    
64     32     
-64    80     
144    192    
-176   0      
224    32     
16     16     
96     80     
-32    64     
-32    0      
-144   48     
112    64     
-560   -32    
96     64     
48     112    
-176   -32    
240    64     
-288   -592   
-128   -272   
208    400    
-208   128    
-336   64     
96     128    
64     128    
64     48     
128    112    
48     112    
-320   -144   
192    32     
256    -64    
64     112    
-16    48     
-176   48     
80     128    
-176   384    
-128   256    
-224   64     
-176   -16    
144    16     
160    48     
-208   -32    
32     144    
-960   -176   
80     128    
-496   0      
-64    64     
272    -32    
-240   -80    
32     -32    
32     112    
208    96     
-128   -48    
-16    -32    
-80    -80    
96     144    
-224   48     
224    112    
-112   128    
-64    80     
112    144    
-160   16     
32     48     
-144   -32    
32     48     
32     224    
-176   32     
-224   80     
272    0      
-272   -48    
128    80     
-144   -64    
112    32     
0      32     
0      80     
64     48     
-144   -112   
48     32     
-48    112    
-80    64     
64     128    
160    224    
-192   112    
64     288    
96     64     
-80    16     
0      -80    
32     48     
96     80     
-112   64     
-32    96     
-48    32     
-64    112    
192    128    
112    192    
-208   32     
-128   -432   
-16    16     
192    144    
-320   80     
144    80     
-144   0      
32     16     
32     32     
-64    112    
128    80     
-80    -32    
96     16     
160    16     
-48    96     
48     64     
96     128    
16     144    
-48    224    
-224   32     
400    512    
-128   224    
-208   32     
96     -16    
0      80     
224    128    
-256   -96    
288    144    
-192   80     
-32    96     
32     -48    
208    224    
-80    176    
-96    160    
-48    32     
48     -80    
48     -16    
16     -48    
64     -128   
176    0      
48     32     
16     128    
224    256    
-160   240    
112    960    
96     512    
-112   256    
16     32     
16     48     
-176   -64    
192    -112   
-32    -80    
32     -48    
-32    -32    
32     16     
96     96     
-32    320    
80     224    
-32    288    
64     416    
-48    272    
32     144    
-288   -624   
-16    -256   
112    176    
-32    48     
0      320    
-48    -1472  
160    -272   
208    320    
-32    288    
-128   -80    
176    -400   
32     432    
192    80     
-16    224    
-160   80     
48     32     
208    224    
-128   288    
32     -480   
192    416    
96     -640   
-48    -80    
64     -1104  
-16    176    
48     144    
192    128    
-240   208    
64     224    
80     -80    
32     208    
48     80     
64     96     
96     -208   
-160   -496   
0      -80    
176    48     
80     400    
592    384    
-288   560    
64     -160   
208    -208   
160    272    
64     96     
0      16     
-320   512    
224    -560   
-192   80     
144    240    
-96    -208   
-64    48     
32     0      
-176   -144   
-64    -736   
-208   -80    
16     -1024  
240    400    
144    -32    
-160   -224   
-112   80     
320    384    
-224   64     
32     0      
320    192    
-80    48     
32     256    
192    -112   
16     320    
-32    -752   
-128   -240   
0      -288   
192    240    
128    240    
128    32     
-176   -64    
272    112    
-48    112    
240    -16    
-176   -80    
736    192    
-304   368    
80     -16    
208    -160   
-240   -64    
-48    -16    
160    -80    
240    304    
16     -224   
0      -32    
-32    0      
-16    32     
0      48     
224    -336   
176    240    
-416   224    
304    -944   
-48    -352   
-272   96     
80     128    
-64    672    
-16    -800   
-32    80     
-176   464    
64     -368   
-144   272    
256    -688   
-304   -976   
80     -848   
-448   16     
592    -928   
-64    656    
48     -128   
208    144    
48     144    
160    784    
96     -112   
-112   -1168  
-240   -192   
320    -336   
16     224    
160    -48    
-224   -688   
112    -256   
-80    176    
0      -336   
48     32     
224    -256   
-80    304    
32     -32    
-48    -512   
96     16     
64     -160   
48     -48    
256    -320   
128    144    
-512   144    
256    192    
-176   -288   
352    -176   
0      112    
48     -576   
80     -144   
96     -1296  
-176   16     
112    -576   
0      -528   
272    208    
-352   -160   
112    -400   
0      192    
-304   -80    
-96    -144   
64     -80    
176    -16    
-32    16     
160    32     
16     48     
96     -336   
48     -16    
192    -112   
-192   80     
160    -96    
-32    -96    
-48    16     
288    160    
-112   48     
80     -16    
-112   208    
-144   80     
16     -64    
32     0      
16     -64    
64     -368   
-368   -272   
240    -2384  
16     240    
-48    32     
-64    -240   
-160   -96    
224    16     
-160   -48    
80     -160   
-320   80     
32     64     
-1360  0      
48     -80    
208    112    
-96    -448   
-48    64     
144    -576   
80     -48    
144    -32    
-96    16     
144    112    
-32    -48    
-112   0      
64     -64    
-32    -96    
-48    32     
-256   -80    
16     -48    
-16    -48    
48     16     
80     128    
-272   -304   
400    112    
-144   -448   
80     -400   
80     176    
-160   48     
0      0      
112    64     
-256   16     
160    -16    
32     128    
-112   -128   
-144   80     
176    -48    
16     80     
32     -176   
-64    64     
80     128    
144    32     
-48    -64    
224    80     
-304   144    
-48    -160   
176    16     
16     -32    
-192   -48    
192    -48    
0      48     
32     -304   
-160   80     
48     -352   
-80    48     
-96    144    
64     0      
-240   -48    
288    16     
-160   0      
-16    16     
80     208    
288    128    
-176   -64    
144    -112   
-96    112    
208    128    
-320   176    
208    0      
160    0      
0      64     
-272   -48    
-176   -16    
208    -96    
-64    48     
336    288    
-96    32     
-96    -32    
64     -16    
-992   -176   
48     160    
-384   64     
-112   80     
-144   -48    
-96    80     
-416   -48    
-272   80     
-320   -128   
-352   -112   
-160   -80    
-224   0      
-64    -96    
-288   -416   
48     -496   
-368   -432   
512    16     
256    -128   
80     0      
416    80     
176    48     
-16    48     
-16    32     
208    48     
-400   128    
-48    -208   
-128   -48    
208    -16    
-160   64     
144    208    
-128   32     
-32    64     
-112   -208   
96     64     
192    128    
-304   32     
144    0      
192    -64    
-144   80     
-48    32     
96     32     
-80    160    
-384   144    
-112   -48    
144    -32    
-112   -352   
64     128    
-80    -112   
-208   -48    
0      48     
16     32     
-16    48     
-112   32     
-144   64     
-48    48     
-64    176    
-304   48     
48     80     
-464   -64    
112    128    
-80    -208   
32     48     
-96    -176   
48     128    
32     -16    
-192   0      
-48    80     
-64    32     
80     48     
48     64     
32     96     
64     16     
-320   -16    
-48    -80    
32     128    
-160   96     
-16    128    
-48    -64    
64     0      
48     32     
48     96     
-32    144    
-224   0      
-16    64     
96     16     
0      32     
-16    -144   
-128   0      
-416   -464   
272    48     
-400   48     
-224   80     
32     240    
32     48     
-176   48     
-48    0      
48     96     
-32    32     
-16    80     
-48    16     
64     448    
16     -144   
-368   -320   
-176   -736   
-80    0      
-16    -16    
-112   -80    
144    128    
-144   -112   
0      80     
32     80     
64     96     
-144   432    
96     -96    
48     160    
-112   160    
-144   -224   
112    80     
-128   0      
32     -96    
-224   128    
-16    -32    
-96    176    
272    688    
-256   144    
32     -304   
-96    160    
-144   16     
80     0      
32     112    
48     416    
-64    -240   
-80    48     
16     736    
48     1088   
-96    176    
-144   -576   
112    -256   
-112   160    
-48    -32    
64     0      
0      32     
-80    -80    
-48    -64    
128    -128   
32     144    
-240   -80    
32     128    
-80    -32    
16     128    
112    96     
-128   48     
80     16     
80     112    
16     -176   
16     -192   
48     -32    
112    -80    
112    -16    
-320   -224   
-128   -192   
-96    -16    
-416   -320   
816    -240   
32     1120   
608    1120   
208    400    
32     272    
64     224    
96     -32    
-160   -368   
-16    -208   
-288   -288   
-80    -64    
96     128    
16     288    
112    96     
-32    208    
-80    96     
272    400    
320    112    
-352   480    
304    -224   
-192   -736   
80     -368   
304    288    
-32    576    
400    608    
-272   336    
112    240    
-144   112    
-80    -80    
160    -128   
32     48     
256    560    
-16    304    
-240   240    
240    -320   
-320   192    
352    -368   
-304   -16    
240    416    
-176   0      
96     512    
-64    224    
-128   -336   
-96    16     
0      112    
112    96     
384    -416   
-128   112    
128    -16    
-176   160    
-160   -832   
240    640    
80     176    
-48    48     
112    -128   
224    480    
-112   -272   
544    80     
-176   464    
32     -208   
48     496    
128    -608   
224    16     
128    320    
-48    272    
128    -64    
48     -144   
-64    -160   
336    448    
-256   624    
-16    -592   
0      -352   
-80    544    
112    -64    
-16    -192   
128    80     
160    -208   
128    -208   
-32    -1408  
-208   32     
192    -32    
80     -64    
-64    -192   
32     -256   
-48    -208   
80     208    
-192   -272   
-176   64     
112    -48    
0      160    
192    96     
48     16     
48     144    
32     -96    
400    512    
-256   464    
48     352    
144    -80    
144    336    
-144   -32    
0      192    
32     320    
0      544    
-32    32     
-32    -400   
160    0      
-80    -320   
-64    96     
192    -272   
0      -240   
128    -2768  
-16    -64    
160    -176   
32     0      
48     192    
112    -48    
-256   -144   
272    192    
0      -192   
-176   -800   
80     -192   
80     -320   
48     48     
80     -256   
80     208    
-16    -144   
48     80     
-32    128    
-80    80     
64     -96    
48     96     
176    -32    
-112   -656   
496    192    
-80    32     
64     176    
-96    -128   
-16    -64    
96     -256   
144    64     
-64    128    
0      80     
-16    16     
192    208    
48     -32    
-96    -144   
208    -144   
112    -32    
-144   16     
272    -144   
176    192    
-288   -192   
272    176    
-16    48     
0      80     
144    -48    
0      48     
128    48     
-64    64     
-32    32     
16     352    
0      -288   
32     -192   
80     -112   
112    -144   
48     96     
64     -48    
0      64     
-48    -16    
160    224    
32     -384   
-80    -1296  
-32    32     
64     -128   
-64    32     
-192   -96    
304    -480   
-32    -48    
272    -176   
-96    -32    
-112   -800   
192    0      
48     32     
176    144    
-64    176    
-224   272    
336    144    
-32    -64    
-16    -208   
64     112    
-400   -48    
80     144    
96     -160   
192    -128   
32     128    
-32    -224   
-128   -176   
288    -1760  
-288   -96    
64     -208   
80     0      
80     -48    
80     32     
32     -128   
144    -48    
-176   -48    
224    0      
-640   -16    
128    16     
112    -48    
-48    -176   
192    32     
0      -16    
80     128    
240    400    
144    240    
-96    -224   
144    -48    
320    -256   
-224   128    
224    16     
-16    -16    
-192   48     
-16    -80    
64     -16    
128    -112   
32     96     
144    48     
-336   -448   
384    -720   
-112   288    
-48    -48    
-32    96     
-176   -48    
96     -32    
0      48     
32     -48    
-336   -144   
336    128    
-320   -32    
80     -128   
-32    32     
48     -560   
112    112    
-144   -720   
-208   0      
272    80     
-304   160    
432    -16    
-304   96     
-96    -128   
-64    -80    
-16    -16    
-176   48     
-288   -128   
-32    160    
-224   -32    
-352   -176   
-240   96     
80     -96    
-144   32     
208    -144   
96     16     
0      64     
-64    -80    
-192   32     
192    16     
-240   -112   
-48    -64    
176    -16    
-64    -48    
-368   -16    
0      -96    
96     256    
112    -288   
-32    0      
96     -896   
80     -192   
-304   -16    
224    64     
-272   16     
208    112    
-368   16     
48     0      
-128   -112   
240    -144   
-16    -16    
112    -112   
0      -80    
-32    -96    
-112   384    
-80    -16    
-224   -80    
-32    160    
-64    -32    
-112   32     
0      0      
16     48     
160    -32    
-192   192    
240    96     
-464   64     
-80    -112   
-32    112    
-1792  -368   
112    -384   
-16    32     
112    -224   
-64    -48    
-720   16     
-176   0      
80     80     
16     -48    
-96    -160   
80     624    
288    96     
-224   -352   
-448   -192   
96     688    
-80    -16    
16     -272   
-96    256    
-368   -80    
-96    -32    
-784   -64    
-352   0      
272    -16    
-32    48     
-16    -48    
16     0      
-480   -144   
-32    16     
-144   -256   
128    -352   
-240   240    
-32    -320   
48     224    
0      96     
-32    144    
-176   0      
80     80     
-144   -240   
-160   -544   
-672   -16    
-112   -32    
-304   -256   
192    -256   
-32    -128   
160    96     
-64    0      
-112   96     
80     64     
-304   -64    
128    -16    
-208   112    
80     208    
-320   -80    
32     0      
-1680  -192   
32     -192   
80     48     
-16    544    
64     -112   
48     160    
-176   32     
0      608    
64     1136   
80     320    
-80    528    
-64    672    
-64    0      
-256   -144   
16     112    
-496   -16    
16     -32    
32     0      
80     112    
-96    -192   
-144   80     
80     -16    
-256   32     
-16    112    
288    96     
-144   -160   
-96    -320   
16     -48    
112    192    
16     208    
-64    32     
-96    240    
-1088  16     
176    368    
-80    96     
-128   -48    
192    336    
288    1216   
-64    752    
-256   -128   
-176   112    
288    -80    
-272   32     
272    -272   
-48    -80    
-112   -384   
464    0      
-640   480    
0      320    
-32    -64    
-64    -400   
128    176    
64     144    
-16    128    
384    784    
-592   -288   
-128   -1120  
352    -320   
-128   832    
272    32     
-48    -160   
272    176    
-464   -80    
-240   -176   
112    -16    
-416   -448   
144    -688   
224    -560   
320    288    
80     496    
64     48     
304    416    
-432   48     
-96    288    
64     576    
160    464    
-304   -144   
-192   -320   
-64    -432   
160    896    
16     400    
-112   -112   
32     48     
32     16     
272    544    
-224   352    
-272   -208   
176    -336   
-64    -96    
64     -16    
-64    -144   
-16    304    
240    352    
-96    -176   
-112   -32    
192    64     
-32    160    
192    -80    
-16    96     
0      16     
-32    80     
-80    -96    
-128   -112   
-128   -224   
-80    32     
96     64     
-112   96     
208    192    
0      224    
96     192    
0      144    
32     80     
-176   -112   
64     16     
240    128    
-176   128    
320    288    
-272   192    
-48    64     
128    80     
-48    -48    
-48    -96    
128    16     
-96    0      
32     160    
448    432    
-496   288    
-64    -48    
80     -32    
-64    0      
0      64     
-64    -224   
144    64     
64     32     
80     176    
48     80     
128    64     
112    160    
-144   96     
64     96     
-144   128    
0      64     
176    -32    
112    80     
-16    16     
-48    96     
-224   -224   
-32    80     
-16    64     
-64    96     
-32    32     
80     128    
64     -48    
-48    -112   
128    144    
16     -112   
192    -144   
64     112    
208    112    
-80    48     
-16    208    
48     64     
-16    96     
32     -48    
32     32     
144    112    
-48    -336   
80     64     
48     144    
64     192    
144    112    
-80    160    
-32    16     
128    112    
-80    208    
-96    32     
176    -64    
80     96     
32     32     
-144   -320   
64     32     
176    -512   
-128   192    
-80    80     
-16    144    
128    -80    
-208   48     
96     80     
-32    64     
16     80     
112    160    
-16    272    
32     112    
-96    -16    
144    16     
-32    80     
176    -16    
-144   80     
80     -1680  
208    96     
-80    80     
32     32     
112    48     
96     80     
-368   -176   
288    -144   
-80    112    
176    80     
96     144    
96     -32    
80     144    
112    -192   
-32    64     
80     -608   
-80    128    
256    -48    
-128   96     
-112   -32    
288    272    
-240   48     
64     144    
128    64     
-208   -16    
240    0      
-144   -208   
-48    -80    
240    -432   
32     128    
-96    -144   
64     160    
80     -96    
64     64     
-80    -64    
320    304    
-368   64     
176    160    
-176   96     
-128   -32    
96     80     
-176   -160   
192    144    
-32    -32    
80     80     
176    -240   
0      0      
-32    -1360  
160    32     
0      128    
96     32     
-16    64     
80     -112   
-96    64     
64     32     
-240   0      
368    208    
48     16     
64     -400   
144    208    
32     -32    
16     0      
128    32     
-16    112    
-48    80     
160    80     
432    560    
-192   592    
-80    112    
144    -48    
176    32     
-176   -448   
112    -96    
144    -304   
0      64     
-32    -144   
80     80     
48     -48    
112    128    
32     32     
128    48     
-16    16     
80     416    
272    240    
-272   32     
64     -32    
-32    -256   
32     256    
160    -112   
-192   32     
32     -64    
336    144    
-112   -64    
496    -1056  
-288   32     
224    -640   
96     -32    
-112   80     
-48    -256   
240    -32    
336    -528   
-112   -128   
-48    -672   
48     -32    
112    -48    
176    96     
64     224    
-112   -144   
144    -32    
-16    144    
80     -48    
240    256    
-736   16     
96     -288   
48     -144   
0      -544   
96     -176   
0      -96    
160    -48    
-160   -2016  
160    -272   
-64    -352   
64     0      
-80    -224   
160    544    
-96    32     
-80    0      
-304   -224   
112    -208   
-1168  -368   
-64    -96    
192    224    
48     208    
-32    -336   
16     -416   
96     -144   
-80    -288   
128    192    
-48    80     
112    16     
48     -128   
48     -32    
-48    -272   
48     112    
-48    32     
-208   -16    
336    -176   
-32    16     
64     -224   
32     -16    
64     -288   
-16    -2288  
272    432    
-224   -32    
224    -160   
-256   32     
64     32     
80     -304   
80     -192   
-176   -32    
64     -48    
-1520  0      
96     -160   
-128   -80    
144    0      
16     0      
64     -944   
-32    32     
80     -64    
32     48     
64     112    
0      48     
-16    128    
272    192    
16     192    
-160   48     
48     32     
0      32     
-112   -64    
-32    -64    
256    80     
32     80     
-80    144    
112    -272   
32     -48    
192    -16    
-176   -400   
96     -96    
-32    -80    
-128   48     
96     -48    
-16    16     
96     96     
-224   -192   
80     -96    
144    160    
-272   -80    
128    -64    
-48    64     
80     -64    
-192   -32    
-160   16     
-144   -48    
-256   -544   
176    -992   
80     -48    
-48    -208   
80     -560   
-592   -208   
144    -128   
48     160    
64     -32    
32     32     
-112   0      
32     -16    
-240   -16    
96     16     
-144   0      
160    96     
-32    0      
-16    16     
-32    0      
128    32     
-176   432    
224    752    
-16    336    
-1040  -368   
16     -32    
-64    16     
-528   208    
48     288    
-384   -144   
-400   -736   
672    -1376  
64     160    
480    1056   
-48    -112   
-176   -400   
208    -32    
-464   -48    
320    128    
-400   16     
224    576    
-192   432    
-224   -112   
0      -96    
64     -112   
-160   -64    
-720   -352   
80     224    
-80    256    
16     0      
-112   -112   
96     272    
64     144    
16     464    
-32    96     
-48    320    
48     192    
-96    80     
-32    -64    
-48    64     
-144   -160   
384    224    
-96    704    
0      304    
-16    -16    
-144   -144   
112    -176   
-320   -304   
-16    -224   
0      48     
-224   -208   
48     -48    
-224   -224   
272    -304   
-144   112    
112    96     
-288   32     
64     64     
-784   256    
448    176    
-464   96     
432    576    
-720   -128   
16     -80    
144    64     
-192   0      
-352   48     
144    -144   
48     224    
-32    -80    
-272   -32    
192    -208   
-48    208    
-96    -48    
0      80     
192    -112   
48     112    
-96    -144   
0      80     
16     112    
-80    160    
16     144    
208    272    
368    96     
-400   -80    
32     0      
48     112    
-128   -80    
-96    -32    
288    64     
-992   0      
48     -80    
-160   -80    
-48    32     
-96    32     
32     112    
144    112    
-304   112    
176    16     
-48    32     
112    128    
-240   0      
80     160    
32     32     
-16    112    
-512   -240   
-144   -48    
80     160    
80     -16    
96     -32    
112    160    
80     48     
16     32     
-144   80     
-144   0      
-16    80     
16     128    
-128   -32    
96     192    
-80    -32    
-256   -112   
272    112    
96     0      
96     80     
-128   64     
-32    48     
-128   0      
112    -32    
0      -64    
192    192    
224    16     
-192   -16    
144    64     
-144   -16    
32     144    
-160   16     
-16    -80    
-112   128    
176    16     
96     112    
-240   0      
-112   0      
144    32     
16     128    
-80    -128   
208    80     
-112   48     
-48    96     
-160   -32    
368    304    
-336   -48    
-16    96     
208    -16    
-192   -32    
224    16     
-32    -32    
176    64     
32     160    
0      0      
-192   16     
112    64     
-112   -96    
-48    176    
112    16     
16     176    
32     96     
-160   -32    
16     -16    
144    144    
-48    16     
-32    128    
-64    64     
80     112    
16     -16    
-112   112    
256    96     
-128   0      
64     32     
-64    32     
32     352    
-96    -96    
112    -64    
48     128    
128    112    
-144   16     
-112   64     
32     96     
48     96     
160    64     
-64    -16    
-96    128    
80     32     
144    80     
-208   -48    
0      0      
48     -32    
-48    96     
32     -80    
16     32     
-128   16     
-96    64     
160    96     
-48    64     
128    112    
-96    144    
96     112    
-112   112    
96     0      
0      -304   
-176   16     
208    0      
48     48     
64     96     
128    208    
-32    -80    
208    -80    
96     32     
176    96     
-32    96     
176    16     
80     96     
32     -16    
16     80     
64     64     
0      -816   
32     -128   
32     64     
112    32     
160    96     
-48    64     
208    32     
-80    80     
96     128    
-96    48     
32     -16    
0      192    
160    16     
144    144    
-16    48     
336    16     
304    384    
288    400    
-224   416    
-48    -64    
-208   -352   
-64    -160   
352    48     
-240   80     
272    0      
-32    80     
272    144    
-224   0      
80     -208   
-32    0      
80     -272   
320    272    
-80    -1584  
-192   48     
32     64     
560    176    
80     208    
16     176    
16     0      
48     192    
112    32     
0      -32    
-208   -160   
160    64     
-80    128    
160    560    
288    512    
96     -976   
-304   112    
48     64     
-208   -208   
-144   -64    
-112   -336   
256    -288   
128    192    
160    112    
176    176    
48     144    
32     -48    
80     64     
160    -288   
32     144    
80     -688   
0      96     
144    -1088  
-32    112    
80     176    
-32    384    
-80    -160   
-16    288    
256    -272   
-64    -64    
-64    16     
64     16     
64     112    
-48    -128   
112    64     
0      -240   
0      -64    
-64    -544   
64     384    
64     -608   
-16    208    
176    608    
-16    -64    
-80    16     
128    -64    
32     256    
-16    -160   
64     64     
288    320    
-160   208    
272    -16    
-304   -256   
224    -544   
-32    368    
48     -304   
160    144    
-48    80     
64     -16    
-96    -176   
-32    -896   
64     464    
224    -304   
-160   -16    
80     48     
-32    32     
112    -96    
-64    80     
80     -112   
48     112    
-128   -32    
96     96     
80     16     
16     -1120  
80     -672   
96     -112   
32     64     
-16    -96    
-16    224    
384    16     
-112   416    
64     224    
96     96     
-128   -272   
32     -64    
112    160    
0      16     
-112   -96    
-256   -224   
80     -384   
144    -16    
48     48     
0      176    
208    -2016  
-64    0      
112    16     
48     48     
112    144    
160    48     
16     -416   
0      160    
336    128    
-224   432    
-448   -400   
80     -336   
80     -144   
-112   -368   
128    -144   
-16    144    
272    224    
-304   -400   
288    -48    
-80    -784   
-80    -480   
-176   -720   
64     -80    
64     16     
-96    64     
-48    -64    
-48    -32    
-976   -128   
32     -48    
-48    -368   
256    -800   
160    16     
64     -64    
112    -64    
-16    256    
32     64     
-112   -800   
112    1360   
-80    -512   
-96    -560   
112    416    
-16    -144   
-112   -448   
192    -208   
48     144    
48     -320   
-80    -160   
160    -160   
-112   16     
-112   -512   
-48    -272   
176    32     
-32    176    
176    240    
240    -32    
-288   -272   
144    -176   
32     48     
144    -144   
-1088  -464   
144    -208   
16     -64    
-80    -368   
192    -32    
-16    -160   
-64    208    
-16    64     
-64    32     
-304   -96    
224    -144   
-32    0      
160    128    
-192   64     
-16    0      
-624   16     
208    -64    
-816   64     
-224   -480   
272    -800   
16     -800   
400    240    
144    -768   
128    128    
48     32     
144    176    
144    208    
-96    -176   
224    -64    
-32    -64    
80     128    
80     32     
-256   0      
144    -64    
48     144    
48     -240   
-80    144    
144    -1232  
-64    -96    
240    176    
256    80     
-224   -64    
64     -32    
-112   -144   
80     32     
-208   48     
320    -320   
-480   240    
400    -432   
-80    192    
192    -96    
-256   96     
-112   192    
112    128    
-208   48     
64     32     
112    96     
-80    16     
-32    -48    
80     80     
272    144    
-240   128    
-656   -32    
-48    -240   
224    192    
128    0      
-16    80     
-192   -64    
-32    32     
-288   16     
64     -16    
224    64     
16     0      
48     32     
-48    -80    
-160   -80    
144    -48    
0      -16    
-320   128    
176    16     
-64    -144   
-320   -32    
-112   0      
-112   -64    
-160   -64    
-336   96     
-16    64     
-1712  -96    
80     0      
176    48     
-128   96     
-144   -16    
96     48     
-272   -224   
96     64     
32     -304   
-32    32     
256    448    
-368   48     
-32    64     
-112   32     
-64    80     
-256   -16    
-160   -16    
192    64     
-16    80     
-224   -128   
96     -80    
-32    192    
-96    128    
-128   -96    
-128   -128   
32     -16    
-96    -64    
16     80     
-144   80     
-144   64     
128    416    
-544   160    
-288   -96    
96     128    
-176   -112   
192    144    
-96    -80    
112    112    
80     80     
-80    -288   
-96    -16    
112    320    
-464   64     
32     32     
112    112    
-112   144    
-64    16     
-48    0      
80     64     
-16    -96    
-80    32     
112    112    
64     48     
96     80     
48     16     
-112   80     
176    144    
-192   208    
-96    32     
208    208    
-80    -96    
80     96     
-272   -128   
64     64     
-448   0      
160    96     
32     0      
-16    80     
16     96     
-16    -16    
-192   32     
128    -32    
0      48     
16     112    
-48    80     
16     -64    
-32    96     
32     0      
48     32     
-272   0      
208    96     
16     80     
-368   0      
64     16     
-176   32     
-224   64     
160    0      
48     -32    
0      -32    
-192   -32    
-32    -256   
176    32     
-240   0      
-48    32     
-144   -192   
0      -32    
336    256    
-256   352    
0      224    
112    -16    
-64    -16    
272    16     
-160   -320   
208    -384   
-16    -48    
64     64     
-32    -144   
96     96     
-80    -48    
160    80     
-128   304    
-64    -32    
-16    -16    
112    -48    
-32    -16    
80     -96    
32     -96    
-64    96     
80     128    
144    240    
-272   576    
48     496    
-288   -80    
144    144    
-144   0      
32     128    
-48    -64    
-112   -96    
128    -128   
32     -96    
16     80     
160    -192   
144    -64    
32     -64    
-128   -96    
48     240    
208    496    
-96    208    
64     224    
-160   64     
144    80     
16     64     
48     -16    
-32    -176   
80     -112   
-80    -464   
192    -272   
224    176    
64     384    
176    -96    
-112   -128   
272    16     
-176   16     
80     112    
208    0      
-64    224    
368    528    
-112   320    
256    176    
-160   -336   
240    -64    
32     112    
-64    256    
384    -96    
-192   -128   
336    256    
80     1296   
-304   -528   
288    -480   
-288   192    
64     -160   
16     288    
-96    -192   
64     80     
-80    704    
128    -400   
-32    -80    
48     528    
-144   464    
336    624    
-688   -400   
128    -176   
-80    160    
112    -96    
-192   208    
48     64     
80     96     
-256   16     
144    96     
96     32     
-48    96     
-16    48     
32     80     
-32    0      
144    -112   
-208   -112   
64     48     
-112   -48    
0      -416   
48     32     
320    112    
-352   80     
16     -624   
0      -96    
-32    -224   
64     192    
48     320    
-80    -112   
-224   240    
224    32     
-80    -160   
64     32     
48     -32    
96     -64    
48     -16    
32     -112   
80     176    
-16    368    
16     -112   
-32    80     
96     96     
-48    32     
112    -160   
-64    -192   
160    192    
64     16     
-112   -64    
96     32     
32     0      
0      96     
96     -464   
48     80     
48     96     
96     96     
-48    -464   
-16    64     
0      -240   
512    64     
208    944    
64     352    
-16    -160   
-16    -80    
48     -48    
96     -64    
96     608    
0      208    
112    -80    
-128   0      
176    256    
-256   -672   
272    -416   
176    352    
-256   512    
32     -624   
96     160    
-16    32     
208    -192   
144    304    
16     16     
128    -144   
-80    -176   
64     192    
-128   -128   
224    -720   
-208   -352   
176    48     
-144   80     
-80    -128   
16     -416   
-64    320    
80     368    
-192   -304   
96     48     
96     64     
32     -16    
-32    -992   
-48    -80    
256    -288   
80     64     
-240   -880   
160    176    
-80    288    
288    240    
-112   -32    
80     64     
-32    848    
144    128    
224    128    
-240   -432   
48     224    
-16    16     
240    160    
128    192    
64     48     
128    -208   
0      -32    
192    224    
128    80     
80     160    
128    -16    
-64    208    
48     -240   
0      64     
48     -256   
128    112    
-80    -96    
240    176    
0      -336   
64     48     
176    -448   
-64    160    
-32    112    
336    464    
-112   400    
128    16     
-112   -336   
192    -32    
-80    336    
272    -176   
64     208    
64     -144   
-80    16     
48     -256   
144    0      
32     192    
112    -336   
-16    96     
400    608    
128    -208   
-32    -176   
96     -368   
-96    -288   
-80    -448   
-64    -112   
-16    -16    
-64    -96    
-16    336    
80     48     
16     -176   
96     80     
32     -320   
-112   -64    
-80    -32    
-16    -32    
208    192    
-112   256    
240    160    
-128   80     
224    64     
-48    -3024  
112    -64    
32     160    
0      -48    
144    -64    
-112   16     
288    -176   
-496   32     
-32    32     
-32    128    
-1488  32     
-16    -224   
-80    -384   
192    -304   
-112   -496   
224    -208   
-160   -144   
-64    -48    
224    256    
-368   -96    
272    144    
128    -80    
96     -80    
80     224    
144    -16    
-448   64     
-160   -256   
336    -368   
112    64     
144    -32    
96     -16    
16     -48    
112    -864   
-32    16     
96     112    
112    0      
176    16     
176    80     
-288   -48    
32     -128   
-336   -48    
-16    -80    
-560   -48    
48     96     
384    160    
-96    -224   
48     -64    
-128   -816   
80     128    
256    32     
-128   -16    
-16    0      
64     32     
-48    16     
-16    32     
-160   0      
208    80     
-304   -80    
80     -112   
80     80     
32     -16    
-64    16     
224    0      
-160   64     
320    -608   
-80    -96    
-64    16     
80     -64    
80     16     
112    32     
-112   48     
48     -48    
-240   -64    
304    -64    
-320   48     
-144   -272   
304    -304   
16     0      
-64    0      
32     -880   
112    -192   
96     192    
128    208    
-128   -32    
96     -32    
-128   -112   
-144   -240   
-80    -176   
64     -16    
-192   48     
160    -32    
-96    0      
224    -480   
176    0      
-160   0      
96     112    
32     0      
-32    16     
-224   -32    
48     -64    
-144   -32    
64     48     
-16    -16    
160    48     
-288   -96    
64     -128   
144    160    
-16    16     
-64    48     
112    32     
-208   -48    
-128   32     
144    0      
-160   64     
96     80     
64     80     
80     64     
-128   176    
16     -224   
-176   -176   
-336   -256   
144    160    
128    0      
16     80     
-176   -48    
-256   -336   
-48    -32    
-832   -16    
0      160    
-80    160    
-240   -112   
48     -208   
-272   0      
64     -144   
-64    112    
16     -32    
-144   784    
-16    -288   
80     -112   
-48    96     
-80    -32    
-144   112    
96     208    
-144   -48    
96     -400   
-160   432    
-416   -608   
64     416    
-16    112    
16     -288   
-160   -256   
80     448    
64     240    
-160   112    
64     352    
0      480    
-64    0      
-80    -128   
64     192    
-368   -80    
-16    -48    
144    128    
-64    -144   
-16    32     
448    592    
-208   -96    
-64    -288   
-16    32     
-128   32     
32     16     
64     240    
-32    160    
-192   -208   
-432   -368   
-80    -480   
-48    -64    
112    96     
-112   96     
176    -112   
288    336    
-320   0      
64     -160   
80     112    
320    560    
-240   128    
-352   -432   
16     32     
-176   -16    
176    48     
-272   -80    
224    -576   
160    96     
192    80     
-240   -32    
-32    -240   
848    832    
-432   768    
192    -400   
160    240    
-32    416    
-336   16     
128    0      
-288   -304   
-400   -368   
416    -432   
-288   336    
-192   0      
96     -224   
-48    -160   
-128   160    
368    32     
32     -368   
-464   528    
-96    -1088  
-80    -32    
64     -16    
96     192    
-128   352    
-192   -304   
64     0      
-144   160    
-112   -144   
-144   -64    
80     -368   
96     608    
320    -240   
256    112    
288    448    
-80    112    
64     176    
144    -64    
32     0      
-176   -176   
208    192    
0      16     
-96    96     
96     32     
-16    32     
-80    -304   
-112   -368   
272    592    
-272   96     
176    288    
-160   -112   
416    320    
-96    192    
48     16     
80     0      
-80    -112   
48     96     
64     160    
16     80     
256    240    
-288   608    
-48    -144   
96     304    
-80    288    
80     -336   
128    240    
-496   -576   
384    -352   
-128   688    
304    512    
32     -160   
-320   80     
208    -544   
-288   256    
-112   -416   
64     240    
64     400    
-176   0      
176    80     
-16    48     
0      32     
48     64     
144    48     
-48    96     
-16    32     
336    464    
-448   144    
96     32     
96     -288   
-240   -720   
512    352    
128    880    
0      336    
128    192    
64     80     
-80    224    
0      -512   
32     -128   
176    176    
-240   -112   
176    112    
-288   -544   
-64    -304   
80     -192   
-64    64     
192    224    
48     384    
0      48     
48     -16    
-160   -240   
80     -64    
-16    16     
-80    -208   
64     32     
112    80     
-48    -48    
-32    32     
16     -80    
-288   -688   
224    -320   
-304   96     
176    -64    
-144   176    
176    336    
160    336    
-80    176    
64     144    
-80    96     
128    64     
144    96     
-64    112    
-64    96     
96     64     
-112   -224   
32     -640   
32     48     
-80    80     
64     0      
-144   -48    
128    80     
-224   304    
272    32     
-16    64     
32     64     
-16    96     
48     144    
384    176    
-384   560    
-32    32     
-112   -112   
192    -32    
64     -80    
-80    48     
32     48     
-16    96     
-16    96     
96     96     
-96    -32    
0      112    
-112   160    
-32    80     
-80    0      
-608   -112   
112    -80    
48     -240   
80     64     
64     432    
0      -64    
80     -16    
256    320    
-208   48     
96     -48    
256    32     
-16    80     
112    -48    
112    96     
16     112    
-32    -16    
32     176    
400    96     
-528   112    
240    -320   
-16    -16    
112    16     
96     -208   
-208   -592   
192    48     
-128   304    
80     224    
160    80     
272    176    
-208   -112   
-80    -288   
80     -48    
160    -96    
16     96     
272    -112   
-80    0      
32     -2944  
-80    -288   
192    -128   
16     -32    
0      -16    
320    128    
160    -64    
48     112    
-48    320    
-48    -48    
48     80     
-32    224    
448    208    
-80    208    
-144   0      
32     -384   
112    16     
192    80     
144    112    
144    -16    
80     80     
16     -240   
-192   -80    
0      112    
-208   176    
224    80     
-176   -400   
80     32     
80     -256   
-80    64     
-96    -160   
256    176    
-96    128    
48     96     
80     144    
-80    192    
96     32     
-240   16     
96     80     
176    32     
32     48     
80     -384   
160    80     
48     -96    
-96    80     
288    32     
16     160    
-192   0      
112    144    
-160   -96    
240    -16    
144    144    
192    -48    
96     80     
16     -160   
160    80     
-16    -208   
-16    48     
112    -112   
32     64     
-96    -896   
96     64     
64     48     
-32    -224   
160    16     
64     -272   
128    -192   
32     -192   
-32    -480   
176    16     
16     -48    
0      -112   
16     144    
160    -48    
-64    160    
112    -80    
32     -368   
-80    -32    
256    48     
-112   0      
-512   -208   
80     -80    
16     0      
64     -208   
96     80     
-208   64     
-176   -480   
0      -880   
496    -112   
-32    160    
-48    64     
128    -16    
0      -96    
112    -496   
-16    -112   
32     -224   
-48    96     
-224   -160   
-16    -96    
32     -336   
112    -720   
96     -272   
-48    -208   
160    48     
112    -224   
-48    -240   
96     -272   
32     256    
176    256    
-80    -192   
-32    224    
112    -208   
-48    -208   
80     -48    
96     -208   
112    -16    
32     400    
144    96     
64     336    
-80    -432   
160    224    
-112   -64    
112    -144   
-144   -224   
352    -368   
-16    80     
96     -80    
-544   16     
-64    160    
-112   -400   
-112   -48    
80     32     
112    -64    
-80    -48    
96     -672   
32     64     
0      -96    
80     208    
192    -336   
192    672    
-448   -576   
144    -512   
-112   -64    
16     48     
-96    192    
32     -384   
96     -128   
32     -208   
-64    -400   
320    -240   
128    512    
48     -576   
128    -80    
144    -272   
-32    -464   
32     -64    
288    -32    
32     688    
-112   272    
-608   -192   
0      -512   
-1104  128    
160    -192   
-208   64     
144    224    
112    352    
96     0      
-144   -16    
-352   -224   
80     -768   
-112   -368   
-48    144    
-16    160    
64     80     
-288   64     
64     -112   
-544   -432   
112    -160   
224    160    
-96    -208   
-112   -80    
32     -624   
-32    32     
0      0      
-96    -336   
0      -192   
64     384    
-112   160    
16     -464   
240    -448   
256    352    
48     480    
-16    -16    
48     160    
-64    128    
-224   352    
-48    -144   
-16    -80    
-48    352    
-352   1040   
272    -560   
128    112    
176    112    
16     176    
64     224    
-16    -64    
192    -400   
-560   224    
-80    1200   
-608   -464   
192    32     
-96    112    
176    -208   
-192   -16    
0      -336   
176    -224   
-32    528    
32     336    
288    -272   
96     -256   
192    -64    
0      336    
-96    -288   
176    656    
-256   -48    
0      96     
96     176    
-256   -96    
-336   -16    
240    -288   
-176   144    
144    -16    
32     432    
16     224    
-64    352    
80     320    
-16    -224   
-176   192    
32     336    
-112   -240   
-208   144    
-32    256    
-224   -272   
-80    -32    
64     160    
-304   -96    
-128   -496   
96     480    
-816   -352   
208    208    
-224   224    
112    -224   
16     -176   
80     464    
112    544    
-224   192    
-16    -432   
16     -368   
192    512    
-176   432    
48     64     
-208   -320   
-288   -432   
-304   256    
-80    368    
-80    -304   
32     -64    
-48    192    
288    576    
-336   -224   
0      -64    
192    -64    
-336   -112   
-16    -32    
-224   -64    
48     144    
-112   32     
64     272    
-160   224    
-32    48     
-656   -112   
112    64     
-96    -96    
96     32     
-48    -48    
-32    224    
160    368    
48     192    
-16    -48    
0      -32    
64     96     
32     48     
48     0      
-16    0      
112    176    
-400   96     
160    288    
-32    -64    
160    112    
96     16     
-192   -240   
64     -144   
-64    -80    
-32    32     
80     48     
80     16     
-240   -32    
80     224    
-224   -112   
-96    80     
-304   -32    
-80    128    
80     128    
64     128    
-64    -64    
48     96     
272    208    
-112   64     
-112   144    
240    96     
-96    64     
-160   64     
-80    128    
-160   -32    
-32    -48    
80     144    
128    48     
-256   16     
96     0      
-64    48     
96     64     
32     64     
-32    64     
64     32     
-496   -32    
288    0      
-256   -192   
352    0      
-288   -16    
192    304    
-128   -144   
48     -48    
-32    64     
48     320    
-80    -176   
320    16     
-80    208    
144    48     
-48    -16    
64     48     
-16    80     
288    288    
-272   256    
-32    48     
-80    224    
96     96     
0      96     
-160   -96    
240    240    
-48    112    
-240   64     
0      -112   
176    -32    
112    192    
-48    192    
288    448    
-384   160    
-256   -16    
-96    -80    
176    112    
-112   96     
-16    48     
176    144    
-64    -80    
96     16     
0      32     
-64    -192   
-256   128    
48     128    
-352   -160   
128    32     
-80    -80    
0      32     
64     176    
32     192    
96     32     
-96    -32    
32     64     
96     112    
32     -32    
48     112    
96     64     
-272   -144   
240    -112   
-144   16     
352    -16    
-128   144    
48     112    
-112   48     
-128   176    
48     272    
64     -32    
-144   80     
384    16     
-144   80     
448    160    
-256   48     
176    48     
144    112    
64     32     
112    80     
-144   -160   
112    96     
32     -80    
-176   -784   
288    192    
-256   80     
208    192    
176    144    
-16    48     
-16    64     
-240   32     
128    -96    
16     16     
-80    64     
-112   16     
-160   16     
80     80     
0      80     
160    -176   
48     32     
192    160    
96     128    
224    -16    
-112   -64    
112    32     
-48    96     
128    128    
128    48     
-80    -128   
32     192    
16     64     
128    176    
48     112    
-80    -320   
240    256    
48     -640   
-112   160    
-16    32     
32     0      
80     96     
336    464    
-16    -48    
-32    48     
-16    -32    
128    144    
-16    96     
-96    16     
64     -144   
96     -96    
96     288    
-160   112    
160    224    
16     64     
176    336    
64     -112   
-80    -96    
80     48     
112    -96    
-16    -160   
176    144    
16     112    
32     16     
-32    96     
80     -192   
48     80     
64     -160   
64     64     
64     -496   
32     64     
-112   -288   
48     464    
80     -288   
304    256    
-80    288    
96     -96    
-48    -528   
256    32     
-160   -80    
176    -352   
-32    -144   
160    -320   
-80    -128   
64     -176   
80     64     
48     96     
64     144    
112    -16    
0      272    
48     272    
-16    -144   
128    304    
-112   -16    
256    -96    
16     -240   
64     -16    
64     32     
-32    48     
48     -192   
128    80     
80     192    
-64    -144   
80     -96    
80     336    
-176   -32    
176    -496   
-32    -64    
-32    -144   
96     80     
48     -64    
32     32     
-48    -160   
48     64     
-32    -96    
192    48     
-64    32     
96     64     
-48    48     
112    64     
-48    80     
96     0      
16     80     
64     32     
-112   -160   
176    -688   
-48    -96    
144    0      
80     128    
0      16     
64     112    
-208   224    
112    -336   
-208   368    
368    -384   
-272   -432   
-32    -64    
16     -912   
0      -240   
32     -304   
-320   256    
608    464    
-320   160    
-48    16     
512    -544   
80     -544   
320    96     
-160   -160   
144    -80    
112    -96    
-288   -64    
304    -176   
16     -528   
32     -240   
-464   -640   
304    -256   
48     -528   
128    48     
32     336    
-144   -96    
224    -368   
-208   160    
-48    -368   
-144   16     
-128   64     
-112   16     
-1408  -256   
336    240    
368    384    
-304   -208   
176    -400   
256    -400   
-288   -704   
-288   -1568  
-128   -224   
448    736    
-208   304    
0      -176   
208    -32    
-112   64     
144    -240   
-112   -240   
-112   208    
352    160    
-368   -336   
128    96     
96     -160   
0      -160   
16     -1104  
0      240    
80     192    
224    1136   
-480   -384   
-160   -80    
464    976    
-320   688    
-272   -64    
16     -688   
-512   -176   
176    128    
-128   -144   
80     -192   
-144   -320   
432    -384   
-144   432    
48     -32    
64     -112   
96     -272   
64     -48    
160    48     
112    -16    
-160   -32    
-80    -96    
80     0      
-64    48     
144    96     
128    16     
-32    16     
112    -160   
128    64     
-32    -384   
176    48     
80     16     
144    -32    
64     -160   
-176   -256   
288    -16    
-160   -112   
128    -64    
384    48     
-368   96     
32     -400   
-64    16     
176    -32    
-160   256    
16     -944   
-96    -112   
-112   80     
0      -32    
-64    128    
-16    -176   
-320   32     
0      -528   
-224   -208   
256    -128   
-224   32     
32     -208   
80     48     
96     -272   
32     144    
112    -176   
16     -16    
-240   64     
272    160    
-448   160    
160    112    
-304   240    
224    368    
32     224    
-112   176    
-544   80     
-16    -32    
48     -48    
208    -240   
144    192    
-176   16     
224    -64    
-144   48     
144    32     
-112   -384   
208    -208   
-128   112    
-384   -352   
160    -160   
304    -48    
-288   112    
-96    64     
48     144    
-192   -112   
48     144    
-128   160    
-240   48     
-112   80     
-144   -32    
-64    0      
-1072  -48    
-176   -80    
64     -32    
-32    -32    
-48    -16    
-64    0      
-208   -224   
-48    -32    
-336   -256   
-144   0      
80     16     
-32    0      
-16    48     
32     -48    
-160   -16    
-32    224    
-128   0      
0      144    
272    48     
-368   -48    
112    32     
-96    -80    
-144   304    
240    -16    
-336   -112   
112    0      
-128   -64    
-48    0      
-304   80     
272    208    
-272   80     
-160   0      
-768   0      
-16    48     
-32    -16    
-48    112    
144    96     
16     -16    
-16    64     
-32    -32    
-128   0      
-96    32     
-48    96     
-208   -64    
192    16     
-112   -64    
-256   16     
-256   32     
-128   -48    
-80    -16    
32     256    
-112   -16    
80     144    
-256   64     
32     32     
-96    -32    
-48    -128   
-32    176    
16     32     
-96    80     
144    0      
-96    32     
-192   192    
128    0      
-816   -48    
288    160    
-384   -64    
-256   -336   
112    80     
16     80     
-32    0      
96     64     
-96    64     
-16    -16    
96     112    
-112   0      
192    480    
-496   128    
128    -16    
-384   -16    
96     0      
48     -176   
-272   192    
80     192    
-240   48     
160    0      
-256   80     
-80    -64    
-80    64     
-64    80     
48     -16    
-16    96     
0      64     
64     224    
0      -128   
16     144    
224    208    
0      48     
-96    64     
16     16     
-48    -112   
32     112    
128    160    
-320   192    
208    -16    
64     144    
208    -48    
-80    16     
128    64     
-64    -32    
112    96     
256    112    
-208   128    
-48    64     
32     128    
0      32     
-240   -208   
64     -16    
128    96     
-48    128    
-48    0      
256    96     
-272   128    
144    128    
-208   64     
48     16     
64     0      
48     -80    
416    256    
-368   160    
128    160    
-208   -16    
256    -32    
16     -48    
16     16     
-96    -64    
240    192    
-48    48     
96     208    
-256   -64    
32     -16    
112    80     
-96    176    
-16    144    
96     48     
144    16     
48     96     
-16    128    
-288   -128   
64     -192   
-48    48     
112    -32    
-64    288    
96     192    
-16    -16    
176    560    
-176   -80    
-64    400    
16     -224   
-128   -64    
256    656    
-144   64     
208    208    
-32    -176   
-48    -480   
-224   160    
48     16     
-112   208    
-128   -32    
16     16     
176    80     
-208   128    
64     32     
-48    80     
352    96     
-240   16     
112    64     
16     80     
-32    32     
64     96     
32     -96    
-144   -448   
64     -48    
16     16     
208    -32    
-144   -160   
144    -144   
-16    192    
64     384    
16     144    
-48    0      
-128   -240   
112    -192   
-48    128    
368    32     
-240   -80    
176    192    
-16    64     
-80    -112   
64     -16    
16     64     
32     96     
0      48     
176    176    
224    384    
-48    608    
-80    112    
160    32     
-32    0      
32     48     
48     80     
80     -16    
-80    96     
-80    -64    
-32    288    
0      -64    
176    208    
144    368    
-96    128    
144    32     
160    112    
-96    96     
176    48     
-112   144    
112    -32    
-80    128    
128    96     
112    64     
-112   -432   
144    144    
80     -1856  
128    128    
128    176    
-48    64     
-64    368    
160    224    
-32    -240   
-80    -176   
48     160    
-112   64     
16     -256   
-64    -32    
240    -112   
-544   -608   
288    -192   
-144   -320   
96     96     
96     32     
-192   0      
32     -256   
-48    112    
32     -208   
-96    -272   
176    -32    
-240   -96    
0      -304   
128    -16    
80     240    
-64    -112   
-48    -144   
528    -544   
-448   -96    
544    -1408  
-80    480    
32     16     
-176   -208   
48     -112   
-80    -128   
-32    -272   
352    -80    
-192   -176   
192    16     
-80    208    
320    0      
-208   448    
48     16     
-16    128    
-64    -496   
0      304    
160    -1840  
-160   -128   
64     -48    
-112   -176   
-48    -256   
0      -224   
48     192    
208    -96    
48     80     
-64    -672   
160    464    
-48    208    
32     144    
224    -608   
-176   128    
144    176    
176    80     
64     -80    
-48    -192   
224    -320   
64     -448   
384    16     
-48    -640   
160    128    
0      128    
0      208    
80     -80    
176    64     
96     -368   
80     16     
176    -112   
-80    80     
-80    -448   
-16    -192   
-32    -448   
-144   -272   
160    176    
-272   -32    
16     48     
128    -272   
-16    128    
64     -144   
-128   -16    
-208   -384   
288    -16    
16     96     
-80    -512   
-96    16     
96     -1744  
80     -576   
0      16     
16     -224   
176    0      
-128   -2240  
16     -112   
32     96     
-96    -160   
80     96     
64     -48    
64     -320   
-96    64     
64     0      
32     -48    
-80    -368   
80     -272   
96     -96    
160    -160   
112    -144   
-64    -1136  
-64    -240   
96     -688   
32     32     
48     112    
-224   -512   
0      0      
160    64     
-48    -256   
16     80     
-96    64     
112    48     
-368   16     
32     144    
144    -48    
-112   -176   
128    96     
96     16     
-16    -112   
112    -560   
-32    -128   
96     -320   
-32    0      
16     -144   
208    176    
-400   -240   
160    -160   
-144   48     
-112   -160   
464    352    
-384   160    
272    -48    
-208   -560   
224    16     
-320   -1184  
112    64     
48     0      
-64    48     
192    48     
-112   -304   
-208   -576   
256    -256   
-144   112    
-96    -128   
-160   16     
64     -144   
-32    96     
144    -368   
-480   -64    
80     -272   
96     112    
80     -160   
64     80     
-64    -64    
-32    144    
-96    -48    
0      -16    
-160   32     
-64    -64    
-1040  -80    
128    0      
-32    -96    
16     0      
368    240    
-176   -176   
-112   32     
368    -1008  
-48    144    
32     32     
-32    -80    
-32    0      
-96    -192   
176    -80    
-80    -16    
-512   240    
272    -96    
-80    0      
16     -128   
32     32     
-160   -432   
96     -64    
128    -1024  
-160   80     
96     128    
-144   32     
-80    48     
80     -48    
-384   -80    
288    -32    
-256   96     
112    80     
-416   -48    
-48    -400   
96     48     
224    -160   
-32    32     
16     -592   
112    64     
-224   32     
416    256    
-496   144    
-16    -112   
48     -64    
96     -16    
-32    96     
80     0      
-176   -32    
144    -128   
-80    64     
96     -64    
-48    64     
128    -112   
-112   -112   
0      -96    
128    64     
-96    128    
80     -32    
-96    128    
96     -16    
-48    16     
-64    -144   
-32    0      
-416   -48    
144    -48    
64     -288   
32     48     
96     160    
-544   -112   
-176   -48    
-576   -208   
-64    80     
272    64     
-96    -96    
176    48     
-160   -32    
112    -16    
144    64     
-192   -144   
48     48     
-240   -192   
-208   -160   
-160   0      
144    144    
-80    -16    
80     48     
-224   128    
336    480    
-448   352    
-112   -96    
-128   -96    
448    192    
-176   96     
-96    -160   
192    160    
-16    0      
-96    0      
240    144    
128    112    
-96    0      
-272   -176   
208    -32    
-320   -16    
-16    80     
128    320    
-288   304    
-192   32     
16     48     
64     -144   
0      16     
32     -16    
0      -32    
80     -48    
160    96     
80     48     
-160   432    
128    352    
-208   176    
-64    -240   
96     32     
96     48     
-464   -304   
48     -528   
352    -48    
-80    160    
176    96     
-80    48     
-48    144    
-64    -80    
-16    -128   
80     496    
80     640    
-320   -400   
-80    208    
-240   -640   
-160   432    
-16    -304   
0      528    
-288   32     
224    -464   
304    368    
-400   160    
-16    -288   
272    128    
-64    368    
-48    -176   
112    64     
-48    208    
-48    64     
-176   48     
-16    176    
-400   -288   
208    -64    
-160   -304   
-16    144    
64     -64    
0      -16    
288    -48    
-304   80     
176    96     
-96    0      
-16    16     
-272   -112   
-16    128    
16     0      
-48    32     
-320   -112   
48     80     
112    96     
16     -64    
-224   -64    
400    160    
-176   16     
176    16     
240    352    
-256   416    
32     144    
-16    16     
-32    0      
-80    -64    
192    64     
-192   -80    
-192   -96    
192    -160   
-144   -16    
128    64     
-64    48     
-96    -32    
16     48     
64     144    
16     48     
48     48     
-112   -80    
16     144    
-208   -16    
-96    16     
-64    -64    
-80    112    
96     80     
-208   96     
32     -144   
64     -32    
-64    112    
16     -64    
80     224    
48     80     
0      -112   
-144   32     
96     96     
-288   -112   
176    144    
-16    0      
-48    64     
64     256    
112    96     
-64    80     
48     48     
-16    96     
112    80     
-32    80     
-128   16     
208    -368   
48     272    
48     544    
-32    96     
64     96     
-48    -192   
-48    -176   
288    144    
-240   112    
496    608    
-32    1040   
-144   -128   
-96    288    
464    -176   
-192   80     
48     80     
288    64     
-96    272    
-208   -176   
224    400    
16     176    
-64    32     
64     240    
-112   -240   
32     416    
-176   80     
128    288    
-176   208    
-96    256    
80     176    
-64    560    
176    480    
224    368    
-144   -16    
64     224    
-160   -352   
80     -32    
144    192    
16     32     
160    128    
-224   -16    
384    16     
80     -112   
-16    16     
48     160    
128    352    
-192   160    
-128   160    
128    -224   
96     -432   
16     160    
32     128    
16     48     
144    48     
48     112    
-64    64     
-16    -80    
288    432    
-160   304    
-416   -384   
624    -144   
-192   272    
176    16     
224    48     
192    -368   
208    32     
-128   -16    
560    176    
-288   80     
304    160    
-144   96     
-32    64     
32     80     
-16    0      
-96    -208   
80     -16    
160    -128   
144    32     
144    48     
80     -704   
-48    16     
32     -448   
144    272    
144    64     
-16    80     
80     96     
-112   240    
224    320    
-96    80     
-176   -144   
368    48     
-32    144    
96     -48    
96     160    
128    64     
-16    -48    
96     -16    
160    0      
256    -80    
192    192    
-32    48     
96     48     
-16    -48    
112    144    
80     64     
-64    16     
16     -16    
80     -16    
0      80     
-16    -112   
0      32     
-160   -352   
144    160    
-32    -1040  
-32    80     
-64    -192   
112    -96    
32     80     
-32    176    
64     96     
-48    80     
-16    16     
32     -48    
32     80     
-32    -32    
32     176    
160    -64    
-96    256    
128    -208   
-112   48     
208    256    
-160   176    
64     -48    
176    64     
16     80     
144    64     
-112   32     
272    160    
-384   -112   
416    -352   
-16    112    
-96    -608   
320    48     
32     32     
-48    96     
304    160    
-320   64     
0      16     
128    192    
112    96     
-48    -288   
32     208    
224    -128   
-48    112    
160    -48    
16     128    
176    -192   
112    96     
48     -288   
80     -96    
32     -16    
160    112    
-112   32     
128    128    
96     144    
16     -112   
128    112    
16     -128   
0      64     
0      -112   
80     64     
-16    -48    
144    192    
-80    -144   
128    112    
64     -160   
96     384    
80     0      
48     -304   
-16    -1632  
-96    -144   
176    -352   
-144   -48    
64     -496   
112    -64    
-48    64     
48     -256   
-64    -112   
400    -192   
-80    240    
32     144    
304    -320   
-96    32     
320    -96    
-176   -320   
-800   -80    
224    -144   
144    96     
160    -16    
-64    -176   
96     -2288  
64     -144   
48     144    
80     -48    
-32    -48    
80     -16    
-128   -240   
128    0      
-176   48     
-16    -16    
-400   16     
48     16     
112    -112   
48     -16    
128    -48    
0      -80    
48     -144   
208    -176   
64     80     
-48    -96    
64     -16    
16     -160   
96     64     
-144   64     
176    192    
-96    -80    
-64    -384   
240    160    
48     -160   
-160   -208   
112    0      
400    0      
208    -912   
-272   144    
80     32     
-112   16     
368    -32    
-208   -320   
144    -592   
-16    -416   
-176   16     
160    32     
-1488  16     
192    -64    
256    0      
0      -192   
-192   96     
96     -544   
-32    176    
-208   160    
0      192    
-32    32     
0      16     
-48    -32    
96     -176   
-16    272    
48     256    
-272   176    
224    48     
-176   -112   
32     -80    
208    -272   
-128   -144   
80     128    
-32    -1120  
-48    -208   
-256   -352   
160    -352   
0      32     
80     -48    
160    48     
96     96     
-256   -64    
64     -192   
48     -176   
64     -400   
-16    128    
128    224    
-16    176    
0      -128   
16     128    
-112   -128   
288    112    
-336   480    
96     80     
-208   176    
-112   -304   
-16    48     
0      -240   
112    16     
-128   -288   
176    176    
-128   -176   
48     0      
128    -592   
-96    -144   
-96    32     
64     64     
-64    -16    
16     -32    
-192   -48    
48     32     
-208   -224   
-64    -16    
-48    64     
64     -336   
224    320    
176    416    
-240   -608   
224    -320   
256    272    
-96    288    
0      -80    
-64    -272   
-16    -80    
-224   -528   
176    48     
160    352    
80     464    
-432   176    
-736   -352   
-16    -256   
-32    -144   
320    512    
-32    352    
-432   -400   
48     -480   
-800   576    
-128   448    
48     224    
-320   240    
288    -64    
-160   -48    
-96    -32    
-32    -32    
-448   -160   
208    112    
-192   -16    
80     32     
-16    32     
-288   -16    
-80    16     
-240   192    
272    496    
-320   64     
-128   -320   
-16    -336   
-192   48     
-240   32     
0      16     
-64    -32    
128    -80    
-224   -176   
-144   -320   
48     -224   
-16    240    
-144   -384   
160    -128   
80     112    
-576   -16    
48     64     
-992   -96    
-64    -256   
32     -80    
48     16     
-80    -128   
64     160    
-80    -128   
-64    -64    
96     80     
0      32     
176    144    
-256   -544   
-32    64     
240    384    
-240   656    
-320   -368   
-144   64     
144    656    
-176   -64    
-64    -416   
-16    112    
-32    48     
-32    112    
112    -96    
-96    -32    
64     192    
-112   -128   
-96    -192   
0      144    
-112   32     
-80    -192   
32     208    
-672   -288   
-16    -96    
272    -32    
-128   384    
96     256    
16     48     
-144   -96    
-176   208    
80     112    
-96    128    
176    368    
-80    576    
224    464    
-112   336    
-240   -160   
-224   32     
-16    0      
-32    -64    
96     0      
-32    -64    
112    32     
-16    64     
208    304    
-208   -112   
-64    -96    
176    48     
-112   32     
-128   -48    
-432   -288   
80     -64    
-272   -128   
160    48     
-1072  -464   
-224   -112   
416    128    
-160   224    
144    224    
48     64     
112    128    
144    224    
-128   -112   
176    -80    
224    240    
-352   32     
80     -16    
-16    160    
16     256    
128    160    
64     112    
48     80     
-80    -64    
256    176    
-144   -32    
-160   16     
240    144    
-176   48     
-32    16     
128    112    
112    128    
96     192    
-256   -16    
64     -208   
496    64     
256    80     
-144   64     
-32    64     
-176   -176   
112    -96    
0      272    
-96    -16    
-16    0      
-240   -112   
160    16     
-224   -96    
-80    0      
-224   -128   
80     48     
272    48     
-80    80     
-16    128    
-48    -32    
224    128    
96     128    
32     32     
-176   144    
32     48     
-112   -64    
336    320    
-480   -16    
144    112    
64     0      
112    96     
32     80     
0      0      
112    112    
-64    96     
-16    112    
32     176    
96     128    
-16    -16    
-144   0      
-192   -16    
-144   16     
128    16     
128    112    
-64    48     
-16    -32    
-32    -16    
-112   32     
-80    48     
-16    16     
144    96     
80     -16    
-80    32     
64     -32    
-32    96     
-16    16     
-32    -32    
-160   -16    
272    112    
-288   -336   
80     128    
96     80     
-144   80     
192    112    
48     48     
96     64     
-48    -64    
144    256    
-128   16     
-160   -16    
480    64     
-240   176    
64     64     
-112   -112   
128    80     
-32    32     
16     160    
144    48     
-48    64     
160    256    
128    -16    
32     -48    
64     192    
112    128    
-272   -224   
-128   -288   
384    288    
-64    32     
128    -160   
-112   96     
64     32     
-16    -48    
80     112    
-16    -32    
-112   80     
-64    -208   
64     -48    
144    -32    
-192   64     
208    448    
-32    -160   
-16    80     
176    64     
0      -272   
32     64     
-32    352    
64     0      
144    96     
48     80     
96     -48    
32     80     
80     112    
-112   0      
144    0      
80     96     
48     144    
-32    32     
160    0      
-208   -320   
112    64     
48     -528   
64     80     
144    80     
16     64     
16     0      
48     16     
80     -496   
-32    64     
32     48     
32     64     
192    96     
-16    -160   
-144   48     
96     -256   
-176   -80    
256    -448   
320    272    
-240   -1856  
-32    80     
192    -16    
-128   144    
48     -448   
288    -368   
-240   -48    
480    224    
-128   -48    
-96    -352   
192    144    
-208   -96    
80     -144   
0      -240   
-144   0      
64     -336   
32     160    
128    112    
-32    80     
32     192    
80     48     
32     -32    
128    320    
80     240    
64     80     
0      256    
144    112    
112    -96    
-128   -368   
208    112    
64     -64    
-112   256    
272    336    
-352   -112   
224    -128   
-112   -32    
-128   -224   
176    80     
-16    128    
-16    -32    
176    -48    
-128   -576   
80     64     
-32    -16    
64     192    
64     -16    
208    352    
-320   -64    
96     -416   
32     -256   
144    192    
-368   -592   
192    -592   
224    432    
-32    -128   
-16    -112   
160    -48    
-160   288    
-16    -368   
-160   256    
96     -80    
0      160    
16     272    
208    64     
32     176    
208    -528   
32     -976   
16     256    
-352   -640   
256    112    
-320   -288   
0      -544   
-48    144    
96     112    
-48    224    
-48    -320   
-32    -752   
192    -208   
96     112    
-32    336    
16     -720   
-96    -80    
256    -640   
0      -16    
-32    224    
112    -416   
0      256    
48     -976   
64     -480   
-64    16     
32     -400   
240    160    
-144   16     
-176   -736   
400    272    
-192   -16    
144    -144   
-912   -112   
-80    -240   
432    0      
-176   -64    
128    0      
144    -48    
-48    -32    
192    112    
-144   -48    
-32    -592   
-160   -112   
80     16     
160    384    
-192   -368   
224    176    
176    256    
-320   -192   
208    -448   
-16    -160   
96     272    
32     -432   
-144   -448   
192    -416   
0      240    
-32    432    
32     32     
64     -176   
96     -64    
-32    288    
192    128    
-352   -112   
-16    -400   
32     -240   
176    464    
-160   320    
112    -432   
224    -64    
-80    -368   
-160   -48    
112    -64    
240    96     
32     -32    
64     32     
-64    -32    
96     32     
-176   -16    
96     -80    
-64    -32    
-48    -144   
-128   -32    
224    176    
-48    -256   
96     464    
-240   -176   
448    -1104  
-16    1024   
16     -160   
0      -592   
-48    256    
64     -32    
-112   -32    
224    240    
208    560    
-320   -192   
-480   -272   
208    80     
-64    64     
144    32     
32     496    
-48    -112   
-64    -208   
96     -80    
16     32     
176    -256   
176    176    
64     -32    
176    80     
-144   144    
-16    -32    
-416   -816   
384    -80    
-80    224    
32     -144   
-144   -512   
80     -384   
176    0      
-176   176    
64     -208   
-176   96     
96     288    
16     0      
-112   112    
-16    592    
240    272    
-224   -208   
128    -128   
-128   -176   
160    -416   
96     -16    
352    208    
16     544    
-128   640    
80     224    
64     64     
-64    -144   
-160   -112   
128    -64    
80     176    
64     -48    
-96    0      
160    -304   
-240   -96    
-512   -80    
-192   224    
-80    112    
-240   -48    
-192   16     
-688   -112   
-48    160    
272    0      
-96    -64    
-80    64     
192    208    
-16    -112   
-64    80     
-32    -176   
-112   64     
-464   -320   
176    -32    
64     0      
-112   128    
-16    -144   
-304   144    
0      -128   
-240   64     
64     80     
-208   48     
-160   -16    
-64    16     
112    192    
-640   -48    
304    256    
-192   32     
-256   16     
336    176    
-288   16     
32     112    
-32    160    
96     128    
-224   64     
-80    -16    
-720   -80    
-304   96     
-160   -64    
176    288    
80     112    
96     160    
208    -160   
-288   32     
416    176    
-80    144    
-112   112    
-48    32     
-320   -256   
-128   -128   
-96    -16    
-720   -48    
-64    0      
-80    80     
-32    48     
-64    -64    
32     80     
-208   -144   
-80    32     
48     112    
256    144    
160    144    
16     -16    
224    64     
16     -32    
-144   0      
112    80     
-16    160    
-640   -32    
-48    48     
-144   -160   
352    224    
-224   160    
-128   128    
-16    48     
-64    -16    
48     -32    
-96    48     
-80    80     
-80    128    
-16    96     
-96    -16    
96     128    
-224   -48    
-288   64     
-160   -352   
0      48     
-64    96     
-48    64     
-112   64     
-80    -48    
0      -32    
16     -112   
32     160    
176    192    
-208   64     
-384   -304   
224    -48    
-416   -16    
144    48     
-64    -32    
288    368    
-384   -16    
80     80     
48     -16    
-80    16     
128    96     
-48    48     
112    48     
-80    16     
-16    64     
-128   -96    
80     96     
-112   -16    
-48    -176   
112    -224   
-128   224    
96     48     
-64    -48    
80     32     
64     32     
96     64     
0      -48    
-160   48     
-96    16     
-224   32     
80     -48    
112    176    
-64    80     
272    288    
-272   272    
80     288    
-48    32     
-80    0      
112    -176   
0      64     
96     80     
-192   64     
48     -48    
-128   64     
400    496    
-368   272    
-80    -16    
32     -160   
-128   -48    
112    112    
48     128    
32     144    
-16    0      
0      -80    
64     64     
32     304    
-160   96     
112    176    
32     -48    
-16    176    
-128   -304   
560    480    
-432   688    
-112   384    
160    336    
80     288    
16     320    
-48    64     
0      192    
208    160    
-112   288    
128    336    
16     64     
80     0      
-32    144    
-112   128    
-48    -48    
112    208    
112    48     
32     -336   
0      -112   
0      144    
-16    192    
224    160    
-192   32     
48     -144   
0      -96    
-64    176    
-16    192    
0      -32    
-112   -656   
64     496    
-272   -400   
400    80     
32     976    
-80    -304   
416    304    
-384   -640   
32     192    
-96    -80    
64     128    
0      32     
64     240    
-208   -272   
192    -224   
128    528    
-208   -1168  
144    -368   
160    64     
-160   480    
128    0      
-80    96     
288    48     
-48    496    
128    -192   
-80    176    
-352   176    
64     -304   
-304   272    
144    -352   
-224   -16    
0      -320   
144    48     
-16    160    
160    -80    
-48    176    
368    256    
-288   192    
-48    32     
-64    -144   
64     48     
96     48     
-256   -416   
448    -656   
240    560    
128    624    
-80    -112   
0      176    
192    160    
0      112    
-144   -640   
96     -256   
32     160    
-32    464    
208    32     
-352   336    
-64    -208   
-32    48     
192    -96    
-288   -288   
-64    224    
320    -320   
-144   -272   
96     -720   
304    -496   
-352   352    
288    528    
-112   176    
144    -592   
-208   -16    
16     -80    
208    64     
-240   288    
256    -176   
-128   -224   
-16    272    
-112   288    
0      -736   
96     192    
-112   144    
240    -1120  
176    16     
80     -208   
416    352    
128    96     
16     16     
-144   -352   
608    224    
-416   336    
160    -240   
288    176    
0      -240   
32     -80    
272    -160   
0      192    
64     -752   
160    112    
96     432    
16     32     
32     48     
80     64     
144    320    
-128   224    
-32    224    
96     -144   
-224   -864   
592    -832   
0      1536   
-32    -384   
224    -144   
-96    0      
96     -400   
-288   -512   
48     -432   
208    -304   
288    640    
-368   -304   
64     32     
208    -128   
-160   176    
192    0      
-48    64     
16     208    
256    64     
144    320    
-48    -400   
80     -80    
48     -432   
16     288    
-48    -16    
0      144    
112    400    
-48    -608   
-16    144    
48     -16    
-16    64     
-32    -48    
16     96     
112    -16    
32     96     
32     32     
256    -48    
-384   -688   
128    -496   
64     112    
-80    -2352  
144    48     
0      -320   
-80    -640   
128    -192   
-96    -864   
112    -352   
-48    -48    
0      48     
-32    -448   
-96    -240   
176    -256   
-144   80     
96     -528   
-16    128    
160    16     
80     -208   
192    -256   
48     -608   
144    -112   
-64    -96    
112    80     
128    416    
16     144    
48     240    
0      -192   
96     -336   
64     -64    
-32    -240   
-144   0      
80     -32    
-240   -128   
-1024  32     
-32    16     
144    -80    
-16    -48    
80     -176   
48     -208   
176    -64    
128    160    
80     0      
-48    128    
240    96     
-144   -32    
144    112    
-224   -48    
64     -128   
-544   -176   
448    -32    
80     112    
64     -48    
208    -192   
-128   -224   
240    -16    
-256   -1904  
-64    -160   
80     -96    
48     -16    
144    -64    
0      48     
-144   -64    
32     -48    
32     -32    
144    48     
-1824  -80    
-32    -96    
64     -64    
-32    -160   
16     32     
-16    -448   
-128   0      
272    -128   
-288   32     
416    64     
-16    -32    
48     0      
240    48     
-592   16     
256    -96    
-608   -16    
80     -64    
-352   96     
-16    48     
128    48     
48     -272   
336    240    
-256   -1424  
64     288    
-176   0      
256    -176   
-32    32     
-48    -352   
-256   -96    
192    -128   
-464   -128   
176    192    
-256   144    
112    240    
-368   64     
-176   -592   
-160   -112   
160    -160   
-32    96     
-96    0      
144    -288   
-96    -176   
96     -16    
-432   112    
80     -128   
-64    -80    
-128   -128   
-496   -128   
64     -272   
-32    16     
224    -144   
0      64     
144    -128   
96     32     
-336   -16    
80     -128   
304    -96    
256    80     
96     48     
-128   -16    
-48    -32    
208    -80    
-1680  -16    
224    -32    
-112   32     
-32    -80    
112    -144   
48     -64    
176    -48    
-288   16     
112    -48    
48     -96    
-128   96     
64     96     
-96    -16    
0      0      
-48    -80    
64     64     
-64    -96    
64     128    
-576   -112   
-176   96     
-64    -32    
-320   0      
-432   -304   
-256   -240   
32     160    
-528   -48    
-96    48     
48     -16    
-16    -48    
96     144    
-192   80     
-448   0      
144    64     
-96    -160   
-16    0      
64     64     
-16    0      
160    32     
-64    64     
-144   -192   
-304   32     
64     112    
-80    64     
144    160    
48     48     
16     32     
-208   -144   
-32    16     
-32    -128   
48     112    
128    208    
-112   16     
-80    -48    
192    208    
-272   160    
-160   176    
-192   32     
-336   -32    
-48    0      
-736   -96    
384    288    
-352   -96    
224    80     
0      16     
-16    -16    
-240   -96    
128    -288   
-128   128    
112    224    
-240   208    
128    112    
112    176    
-752   0      
-144   -224   
-496   -496   
-32    -128   
-16    -224   
-80    0      
-16    64     
-96    -240   
-208   -160   
80     0      
-80    48     
32     384    
0      0      
-64    96     
16     128    
-304   256    
0      -208   
-416   -64    
96     368    
32     -144   
-48    208    
-96    -96    
-16    -560   
0      384    
-288   -752   
32     -448   
-128   336    
144    32     
-80    624    
-32    -144   
-96    -272   
64     80     
-176   96     
176    16     
16     64     
112    48     
-96    32     
208    64     
-16    32     
-144   -352   
112    -96    
32     160    
-80    128    
48     -32    
-80    80     
0      16     
128    128    
-320   -256   
256    32     
-1024  240    
-64    608    
64     144    
-160   0      
16     -112   
-96    -16    
96     -16    
-128   -176   
-176   -16    
16     144    
-288   96     
-48    -144   
-192   144    
-144   -80    
-128   64     
-400   -304   
272    -528   
-176   -192   
144    -208   
-96    -192   
-48    -144   
320    -64    
-272   0      
176    48     
-16    -112   
-16    160    
-48    -64    
-176   368    
-352   -272   
32     -192   
240    48     
-176   0      
0      48     
240    208    
64     64     
-176   32     
256    304    
-80    272    
192    32     
160    384    
-320   432    
-224   -144   
112    -80    
-272   -304   
-240   -224   
464    320    
-208   256    
-256   64     
-144   -272   
96     -256   
-144   400    
16     96     
192    192    
-240   128    
-64    160    
-96    64     
-16    -160   
-32    -144   
-80    48     
160    64     
96     272    
-160   112    
208    -96    
208    144    
128    -112   
-32    240    
-32    -176   
96     144    
96     704    
480    672    
-464   16     
32     -464   
144    320    
0      -96    
-16    -80    
192    0      
0      336    
256    304    
-336   -544   
816    -720   
-128   1664   
288    -240   
48     -304   
128    384    
-16    208    
-96    -160   
-32    -64    
16     -16    
208    224    
-176   -544   
64     -384   
464    96     
80     560    
16     -304   
-112   -496   
288    528    
-240   656    
-96    -240   
-48    -192   
-64    -80    
0      144    
80     0      
-96    -176   
64     -288   
96     48     
320    -160   
-256   -480   
160    32     
128    32     
-272   -528   
80     -320   
208    240    
48     144    
128    128    
48     -128   
256    112    
32     304    
112    176    
208    384    
16     272    
-128   -336   
-80    -144   
240    16     
-112   224    
320    144    
-176   128    
16     464    
-112   -240   
0      -64    
96     -96    
-48    80     
48     48     
-64    -368   
272    208    
-112   -1872  
64     112    
336    496    
-208   352    
48     32     
-112   -96    
112    64     
128    288    
-48    96     
80     -80    
-80    80     
192    32     
-144   32     
224    -160   
-224   80     
112    0      
-48    144    
-16    80     
-48    0      
80     32     
-112   -272   
-48    -144   
128    112    
-80    48     
-80    -64    
112    -48    
-64    -160   
96     80     
64     0      
-32    0      
-16    48     
-112   -240   
16     -2784  
176    48     
-48    224    
48     48     
80     -112   
48     144    
160    80     
-64    144    
-32    16     
160    16     
-112   352    
80     -48    
0      64     
112    -176   
-32    128    
208    -240   
-16    96     
80     48     
48     96     
320    64     
-192   128    
48     -16    
-16    -32    
64     96     
80     0      
48     48     
48     -80    
112    80     
32     -64    
16     -96    
-80    -416   
176    112    
64     -336   
32     -48    
-32    -80    
0      0      
32     -128   
192    -16    
240    176    
-80    -48    
64     96     
-32    -368   
80     64     
80     64     
176    224    
-240   -272   
176    64     
32     -96    
-240   80     
112    -48    
-96    -80    
208    32     
-192   -176   
64     64     
-128   -352   
0      144    
-32    -112   
352    272    
-208   64     
-80    288    
-128   -464   
192    64     
-16    0      
112    96     
-16    96     
64     -656   
32     112    
80     -48    
48     -1376  
-208   -128   
192    256    
48     -96    
32     -208   
96     -160   
176    208    
16     64     
-16    -816   
-80    -128   
288    0      
0      272    
-64    -112   
64     -752   
432    192    
-160   -176   
0      -80    
240    -816   
-112   -176   
16     -1200  
16     -160   
176    64     
-144   -208   
336    -32    
0      32     
48     -128   
64     64     
16     -96    
192    96     
-336   16     
-64    -48    
112    16     
32     -192   
128    16     
144    -96    
128    80     
192    -32    
-48    -96    
0      -176   
160    16     
128    -192   
64     16     
96     128    
208    64     
-304   -96    
32     -32    
288    16     
32     -32    
-48    -32    
192    -208   
112    48     
208    -576   
-64    -80    
48     16     
-16    96     
112    64     
16     80     
-16    -64    
48     -80    
-240   -96    
112    0      
-464   192    
-208   -32    
-16    -224   
192    -368   
64     -80    
-16    -352   
112    160    
-128   -32    
96     272    
320    -160   
-32    -80    
-128   16     
128    -16    
-288   -240   
400    320    
-96    160    
-32    0      
-336   -208   
240    -80    
128    64     
-16    -128   
96     48     
96     32     
32     16     
64     -80    
96     -96    
-96    -80    
176    16     
32     -112   
-96    -512   
16     -448   
16     -320   
-288   96     
272    -416   
48     320    
-32    0      
-32    -176   
176    -400   
-16    96     
-64    0      
80     -96    
-64    32     
64     -80    
-368   -32    
64     -112   
-384   -48    
496    304    
-992   -784   
288    -256   
224    928    
-272   -944   
-48    224    
48     -784   
64     80     
-16    224    
96     -128   
-96    -96    
240    16     
-96    320    
192    -16    
-80    -16    
-48    416    
64     -704   
-32    -96    
112    192    
80     -320   
-16    48     
160    -144   
-64    16     
128    0      
-160   -272   
224    -48    
-16    416    
-32    80     
48     32     
-192   16     
16     -304   
-48    80     
64     -96    
-16    352    
-256   224    
160    528    
-80    -32    
-912   -288   
112    -320   
-1184  -48    
16     -64    
-240   48     
80     32     
-32    -128   
-128   -112   
128    48     
192    32     
-400   -96    
112    80     
-576   -112   
-16    80     
-96    32     
128    96     
96     272    
-112   336    
352    144    
-368   288    
-64    -32    
-80    -144   
-96    -144   
32     -144   
-208   -256   
-560   -560   
592    -176   
-272   -144   
80     240    
272    192    
-208   144    
128    128    
-112   -112   
320    16     
-400   -160   
-288   -176   
-896   -176   
48     288    
320    176    
144    304    
416    208    
-240   320    
-208   -272   
496    -192   
-32    64     
-128   -224   
96     -400   
160    224    
-112   384    
-64    64     
16     -16    
-112   -64    
96     64     
-704   80     
0      -64    
240    -32    
-160   -16    
-48    0      
-64    64     
-160   48     
80     128    
-160   96     
-32    176    
-320   -416   
448    -80    
464    752    
-368   816    
-240   -288   
-224   304    
-16    144    
-96    -96    
-48    -176   
96     -144   
-256   608    
208    -400   
-272   -128   
48     -432   
-368   -384   
304    -448   
-144   304    
-64    368    
-224   -336   
0      -256   
-368   -272   
288    304    
-64    320    
464    640    
32     656    
-80    480    
-64    48     
304    224    
48     80     
-240   -304   
48     -64    
-48    64     
-304   -208   
-352   -544   
160    -304   
-208   -240   
144    16     
-2096  -128   
176    -176   
-256   80     
64     48     
-144   112    
48     48     
-48    192    
400    368    
-288   192    
48     112    
96     0      
-16    64     
-112   112    
-272   192    
368    176    
-896   -128   
-96    -288   
256    16     
-16    32     
16     96     
-112   80     
32     224    
288    112    
-272   -32    
32     304    
96     192    
-544   64     
32     128    
-144   80     
16     -16    
112    -32    
0      0      
112    32     
-128   0      
-48    -32    
-16    -208   
-224   -32    
176    112    
-176   32     
0      -48    
-112   16     
32     32     
32     0      
0      0      
112    32     
32     64     
-48    -288   
32     -48    
96     192    
-240   0      
0      64     
16     64     
-16    0      
48     -272   
-112   64     
576    480    
-400   160    
128    96     
-144   80     
-32    48     
48     80     
-64    -16    
128    64     
48     80     
96     -16    
0      96     
144    112    
-80    16     
48     80     
64     112    
96     144    
-176   -32    
112    112    
-64    112    
-96    112    
224    208    
-240   0      
48     112    
192    96     
-64    16     
-64    0      
0      -48    
-32    -144   
112    128    
176    96     
-96    96     
-80    32     
80     64     
-16    48     
96     64     
80     160    
176    144    
-48    -48    
176    -32    
96     96     
48     96     
224    112    
-288   64     
208    80     
-144   32     
144    160    
32     96     
64     -848   
-64    144    
432    256    
-416   160    
208    160    
-112   -32    
0      32     
96     64     
48     112    
192    32     
-160   -80    
48     32     
-48    -16    
352    272    
-224   128    
-16    -176   
48     64     
16     64     
-32    80     
-64    -64    
0      0      
96     48     
80     112    
96     0      
16     48     
48     96     
-128   80     
-32    -96    
80     192    
16     64     
-48    -368   
144    128    
-96    -1104  
0      96     
0      80     
48     64     
-16    16     
48     112    
-128   -272   
-96    -144   
208    0      
-80    -64    
-48    64     
208    288    
256    16     
-16    16     
128    48     
0      -144   
80     128    
160    16     
0      16     
-128   80     
192    -96    
-352   -496   
176    128    
-64    16     
128    112    
304    256    
-480   -64    
112    16     
16     -64    
-96    96     
16     -448   
160    112    
16     -256   
-64    -96    
16     -64    
32     64     
-48    160    
112    80     
-128   -112   
-96    48     
144    64     
-96    -176   
112    64     
96     -32    
80     48     
48     -480   
96     160    
96     -1552  
-224   48     
96     336    
0      192    
272    -16    
-32    112    
0      32     
16     144    
-224   -128   
272    -48    
240    224    
192    192    
192    208    
-48    -304   
48     160    
-144   -208   
208    144    
-80    -256   
112    304    
-464   32     
48     -16    
160    96     
80     176    
0      112    
-80    -288   
16     0      
48     -320   
96     -48    
160    -368   
224    -96    
320    144    
-208   256    
80     -112   
16     48     
112    128    
-64    -16    
16     64     
0      80     
16     208    
16     -384   
-64    144    
144    -112   
48     0      
80     -208   
224    336    
48     512    
96     -272   
192    -960   
176    320    
16     -112   
48     240    
-48    48     
48     -176   
-80    -1952  
48     -32    
112    112    
0      16     
192    240    
112    -96    
-32    352    
16     -48    
400    160    
-320   -592   
160    -208   
192    368    
-192   -208   
48     -160   
-816   -192   
-208   -208   
112    -32    
112    -256   
80     -64    
112    -1792  
-16    -208   
80     96     
16     -48    
48     -352   
160    16     
-16    -176   
64     192    
-80    -272   
32     -32    
-448   160    
144    112    
-32    112    
-32    -112   
-128   -432   
256    -896   
80     48     
-16    112    
320    -16    
0      -192   
176    -272   
160    -128   
224    144    
-160   96     
-32    -96    
32     -32    
48     -112   
48     16     
-48    -80    
64     176    
-176   -96    
112    128    
128    32     
-64    -80    
112    -32    
240    240    
-128   96     
32     192    
-96    448    
368    320    
-352   176    
-16    336    
-1344  160    
-272   -288   
208    32     
-16    0      
144    -80    
96     -832   
144    -96    
-160   0      
48     0      
112    -80    
16     -16    
-80    -48    
0      32     
-32    -16    
-48    -16    
176    592    
64     576    
-48    144    
160    -32    
-64    0      
224    -112   
-64    224    
224    -560   
48     96     
-128   -208   
64     -160   
48     -496   
-16    144    
160    624    
-160   128    
-320   -96    
432    -48    
-1424  432    
16     16     
256    -160   
800    160    
-384   64     
112    -800   
64     64     
-96    -160   
144    -272   
-96    80     
432    96     
-592   -48    
240    -576   
-16    16     
-48    -16    
192    624    
-464   -464   
-48    -304   
144    -112   
-272   -32    
32     -912   
-16    160    
-16    368    
-176   304    
-432   -80    
32     -320   
-288   -176   
160    -112   
-32    112    
80     112    
128    144    
16     -176   
0      96     
64     -448   
-176   -160   
80     -256   
32     -48    
-80    32     
32     -64    
48     -48    
-32    -272   
112    -48    
176    32     
64     80     
112    -64    
32     336    
208    -112   
32     -16    
96     -16    
-224   -16    
-416   -112   
-464   176    
-16    -176   
-352   -400   
208    -96    
288    64     
32     48     
0      -32    
160    -80    
32     -112   
0      128    
-176   -16    
-48    96     
64     240    
-304   336    
-16    0      
-160   80     
32     16     
-160   48     
-192   -96    
32     0      
32     128    
-64    -16    
-48    32     
144    0      
-144   32     
-288   -16    
-16    160    
-32    -48    
-112   32     
-144   80     
-144   -16    
0      -16    
-32    240    
-160   128    
-240   48     
128    80     
-96    -80    
16     -112   
128    -16    
80     560    
-176   16     
96     32     
-112   -320   
-416   -144   
80     80     
-48    -32    
32     80     
80     80     
-32    64     
-288   -96    
96     0      
-176   96     
-16    16     
-176   -32    
32     96     
-48    -208   
-64    64     
-32    -112   
0      32     
192    192    
-144   240    
-48    96     
176    320    
-528   64     
64     -16    
128    176    
32     112    
112    80     
-976   -144   
128    96     
272    80     
-576   96     
288    64     
-192   80     
112    48     
-80    64     
-112   -48    
160    0      
-160   128    
80     144    
32     32     
-304   -64    
96     48     
-480   128    
128    128    
-64    -96    
96     96     
128    16     
-256   16     
16     48     
-16    64     
-176   -16    
176    32     
-80    -48    
-96    48     
-32    64     
-240   -96    
0      -32    
-336   -176   
144    128    
-976   -144   
32     -80    
32     208    
-48    32     
-48    80     
112    80     
48     144    
32     144    
-352   -112   
320    -144   
32     64     
-432   -48    
432    48     
-128   64     
-16    80     
-400   -16    
-96    96     
128    80     
0      -48    
0      -16    
-208   -64    
256    96     
-224   -176   
48     0      
48     96     
-144   128    
48     112    
32     64     
-16    48     
-256   48     
352    160    
0      176    
-64    16     
128    112    
-16    96     
64     144    
-48    16     
-128   -112   
144    48     
-160   32     
272    336    
-128   -48    
-32    -80    
-96    -16    
-128   48     
0      48     
32     48     
0      96     
0      80     
-144   80     
-96    -32    
176    320    
-32    112    
16     80     
-16    48     
32     112    
112    112    
-224   112    
-16    16     
16     32     
96     64     
-32    48     
16     96     
0      16     
0      -16    
-16    80     
-16    -80    
-32    0      
-48    64     
0      16     
-272   -64    
304    -352   
128    -208   
-16    160    
16     16     
-80    -48    
288    0      
-64    160    
224    320    
-160   64     
64     32     
-64    48     
96     80     
-368   -592   
32     -208   
240    352    
-192   112    
-288   0      
256    -32    
96     160    
-240   -32    
160    16     
112    64     
160    176    
-128   -16    
-128   -96    
176    -32    
96     -16    
48     112    
-112   0      
368    448    
-352   432    
16     -48    
-64    144    
-32    0      
64     64     
192    272    
208    208    
160    272    
-336   -48    
-144   -80    
-192   -368   
-208   -352   
64     192    
-32    32     
160    288    
-288   128    
-80    -320   
320    48     
48     -32    
80     16     
128    80     
-32    80     
16     176    
-144   -224   
0      48     
352    432    
-416   48     
128    0      
-240   800    
160    -144   
-272   -96    
96     -160   
0      176    
320    -1328  
-256   32     
96     112    
-224   -64    
208    -144   
-112   -224   
16     320    
-64    32     
-16    -352   
32     256    
64     48     
160    240    
64     592    
0      112    
288    176    
-128   -1024  
0      -144   
80     -64    
32     144    
48     16     
-32    96     
64     -240   
16     208    
32     0      
-48    -160   
144    96     
320    496    
-160   480    
16     -240   
208    160    
-96    -208   
176    80     
48     -432   
96     64     
-112   48     
-32    96     
80     -80    
-32    64     
64     32     
64     112    
0      32     
-16    -464   
-112   -448   
112    -416   
320    32     
-160   -112   
16     112    
144    -1088  
-16    176    
160    -288   
-160   -144   
208    -32    
-80    -64    
128    -16    
-336   96     
384    672    
-64    288    
-192   -176   
224    -96    
48     80     
-16    -32    
96     112    
64     -144   
304    256    
-80    336    
80     0      
160    -128   
64     112    
32     -96    
-32    128    
80     0      
0      -144   
336    448    
-160   48     
192    96     
-16    -272   
0      432    
384    336    
80     448    
-32    -128   
144    96     
32     -16    
16     32     
-80    16     
96     432    
80     240    
-32    -144   
-32    32     
0      -256   
48     80     
0      -160   
32     112    
112    -32    
144    800    
208    -144   
-496   -864   
512    -1040  
48     944    
-96    368    
256    -544   
16     128    
176    48     
0      176    
112    768    
-224   -32    
240    -224   
48     16     
64     -112   
-32    -368   
16     -32    
80     -48    
80     64     
144    16     
256    560    
-384   208    
176    -192   
-48    272    
176    -416   
-16    -48    
-48    -368   
96     -448   
-144   -368   
96     -480   
-112   -1248  
96     -128   
-304   -848   
96     -240   
320    -128   
0      32     
-1104  176    
-64    -16    
176    0      
80     48     
160    -32    
-432   -64    
384    176    
16     208    
48     0      
16     -176   
144    64     
192    -80    
-96    -160   
64     -32    
-320   -768   
128    -32    
-16    80     
-32    16     
0      -112   
112    16     
0      -672   
-16    64     
-304   -320   
528    -48    
-64    192    
144    -96    
-32    -16    
48     32     
-176   -32    
-48    -128   
96     64     
208    48     
-944   -64    
272    -192   
0      128    
112    -352   
0      128    
336    -160   
-400   -80    
192    -64    
-32    -16    
288    112    
48     96     
-48    -32    
64     16     
-560   -240   
192    -192   
-656   0      
-80    16     
32     -80    
0      112    
144    -32    
96     -48    
-144   -48    
96     -944   
64     96     
144    16     
16     16     
-16    -64    
80     -32    
-160   -80    
-48    -112   
64     208    
-80    80     
160    256    
-144   -240   
48     -32    
112    -432   
80     64     
0      -624   
-96    0      
64     -80    
-80    -112   
144    -48    
160    0      
-208   -96    
240    16     
-96    -16    
16     -112   
-192   0      
80     -64    
-192   -144   
192    -160   
80     80     
0      -224   
208    192    
-352   16     
64     -16    
-32    16     
32     0      
-64    32     
80     64     
0      -48    
0      80     
-80    -112   
-32    128    
176    96     
144    0      
-96    64     
112    -416   
80     -48    
192    144    
-16    -112   
96     -96    
16     -48    
-96    96     
-64    -32    
-96    32     
128    32     
-128   -80    
0      48     
320    192    
-240   -160   
80     16     
-704   -304   
-784   0      
-48    48     
-1040  -144   
-176   -48    
-128   -272   
-16    -64    
128    -16    
-208   -64    
160    -176   
-16    0      
-576   -288   
32     160    
-352   -320   
-64    48     
128    112    
-304   -64    
32     112    
64     -176   
-80    32     
-48    -32    
32     16     
64     64     
-128   0      
-48    -128   
32     64     
-528   -176   
16     32     
-80    48     
176    304    
0      80     
-144   -16    
16     0      
-272   -16    
256    160    
-240   80     
144    96     
-1248  16     
-80    32     
-160   -208   
112    64     
-16    -96    
-144   -32    
320    -96    
-80    -16    
-176   64     
-48    -16    
-400   16     
368    64     
0      48     
-144   -48    
48     48     
-400   16     
96     64     
-304   -80    
-128   -16    
224    -80    
224    368    
-304   32     
-176   48     
64     -96    
128    48     
16     112    
-48    64     
-128   48     
-112   32     
224    240    
-208   -48    
32     80     
-256   -16    
272    272    
-64    -128   
-96    80     
-80    160    
192    -64    
0      -48    
-96    -48    
48     112    
128    272    
96     320    
-256   -32    
-48    48     
-16    -32    
48     -16    
-848   -32    
-112   112    
-32    -128   
96     32     
-272   -384   
112    -880   
-96    -240   
192    64     
96     112    
64     240    
-288   112    
16     240    
80     208    
-512   -240   
-144   -112   
-256   -288   
-32    -288   
48     -304   
128    -112   
336    240    
-80    352    
112    16     
-320   -496   
-16    -96    
208    16     
-240   32     
96     80     
64     48     
224    112    
-240   192    
48     144    
176    496    
-352   192    
-224   352    
240    160    
-240   32     
64     0      
-208   -320   
144    -112   
144    752    
-240   -176   
-240   -1360  
112    112    
-96    288    
-176   -288   
192    224    
-112   160    
128    -144   
208    128    
64     32     
144    112    
-112   -96    
-96    -16    
192    208    
-160   64     
48     -48    
-224   144    
96     -144   
-224   32     
112    480    
80     -64    
-192   32     
80     16     
192    80     
-128   80     
80     128    
144    16     
-64    64     
128    160    
-48    32     
16     64     
-112   -16    
352    448    
-176   480    
-80    -272   
-48    -400   
-144   -16    
96     48     
-96    128    
464    480    
-256   720    
-128   112    
-128   -112   
-96    -352   
160    -560   
160    32     
-128   -208   
-48    -336   
-16    -112   
-48    240    
48     160    
-48    304    
256    384    
80     448    
-16    240    
-48    16     
112    224    
176    0      
-320   80     
304    96     
-96    32     
-128   -64    
64     64     
-64    0      
64     80     
32     64     
32     64     
48     96     
288    192    
-240   -32    
-80    -16    
144    16     
240    288    
48     752    
-208   160    
80     -96    
-32    -64    
-160   -304   
128    -224   
80     448    
144    608    
16     64     
-256   -64    
176    -208   
-144   16     
176    -16    
-32    112    
-16    208    
64     112    
-192   80     
208    -256   
-80    -192   
-32    -352   
-48    -304   
192    -880   
176    304    
16     48     
96     32     
-80    288    
128    -176   
-400   -960   
-32    -784   
416    304    
-224   1056   
-112   -272   
160    64     
-64    -304   
96     64     
-32    -64    
-80    -416   
96     320    
160    -704   
-32    928    
-96    -608   
272    224    
192    80     
32     96     
16     -112   
128    160    
48     16     
-48    -112   
112    -96    
-64    160    
-96    -384   
-192   -928   
160    -256   
48     -448   
144    384    
-16    608    
-16    96     
-112   -64    
-144   -144   
0      64     
-48    -96    
16     -16    
128    112    
32     -16    
128    16     
64     192    
80     0      
48     112    
-352   -1104  
384    80     
48     -432   
-224   -64    
-32    -128   
160    16     
-128   -176   
144    -48    
-16    -32    
96     96     
80     272    
0      -144   
96     -176   
112    48     
-16    224    
-128   -48    
112    48     
16     -96    
0      32     
-112   -160   
16     -112   
112    -48    
192    48     
-112   -48    
160    48     
-80    32     
208    -144   
160    256    
-192   -32    
80     -48    
-208   -336   
176    -64    
80     -64    
-16    112    
48     -672   
32     160    
176    96     
-32    96     
304    224    
32     176    
32     32     
-16    -48    
112    192    
64     -160   
-48    128    
-32    -288   
-128   128    
288    -704   
-304   48     
112    -368   
368    480    
-528   128    
-112   208    
272    32     
16     144    
144    96     
80     -208   
16     112    
80     -64    
-16    64     
-32    -288   
288    160    
64     -208   
160    112    
128    16     
208    256    
-112   144    
-176   -64    
224    80     
16     0      
-64    160    
-64    -16    
-96    192    
32     -144   
80     128    
272    -32    
-144   32     
80     128    
144    80     
-208   -368   
16     -1216  
-16    80     
-80    -320   
96     112    
160    80     
-112   16     
-48    -64    
240    -768   
-96    -240   
192    48     
48     0      
128    96     
96     -128   
-16    -128   
-48    -48    
-80    -592   
144    32     
144    64     
96     64     
-128   336    
-320   -64    
64     -256   
48     16     
80     -64    
16     -48    
144    32     
-32    -1200  
112    -144   
64     -368   
-16    -80    
0      32     
112    -16    
80     -64    
-80    -128   
-64    0      
80     -240   
-128   0      
112    80     
80     224    
48     -320   
64     -160   
32     -1712  
160    16     
96     32     
-64    224    
448    48     
-320   64     
64     32     
-16    -16    
-384   -48    
224    96     
-1376  -16    
80     -144   
64     -144   
160    -208   
16     -192   
48     -912   
128    -32    
64     -64    
-64    112    
176    -144   
32     -16    
-16    32     
-64    16     
16     48     
0      -96    
-320   -48    
80     -64    
-176   96     
48     64     
-32    64     
32     -48    
32     0      
16     -1280  
128    80     
16     -128   
-16    -128   
48     -16    
112    -112   
0      48     
-48    -128   
-48    32     
0      -48    
-368   -112   
80     -144   
-128   -160   
224    -256   
-144   112    
176    -416   
-176   32     
208    112    
528    400    
-304   640    
-16    -32    
-208   -16    
176    16     
-128   -144   
208    272    
-416   -80    
32     -240   
-480   -128   
64     -352   
32     -48    
-48    -688   
80     272    
16     320    
64     160    
-176   352    
-16    720    
112    -464   
48     144    
80     32     
96     -176   
-304   -144   
112    -208   
192    80     
32     -64    
-32    352    
160    80     
112    480    
-288   80     
16     -336   
-16    48     
128    288    
-320   -448   
112    -32    
-304   -80    
272    32     
-80    288    
32     -224   
160    144    
16     -64    
96     160    
-704   -288   
-1200  128    
-80    256    
96     -208   
48     32     
96     48     
-144   -224   
112    128    
-96    -112   
-128   -384   
336    -528   
-448   208    
160    480    
-32    -704   
-80    -96    
32     160    
-80    240    
128    48     
-160   32     
80     32     
-208   192    
368    -32    
112    208    
-240   0      
304    16     
160    400    
-496   -176   
0      128    
-368   144    
16     336    
-240   320    
192    -528   
-304   -576   
144    -192   
-224   128    
-608   16     
112    -208   
-544   176    
32     48     
-16    -64    
-80    208    
-368   -272   
0      64     
-304   432    
272    -736   
-80    64     
-336   256    
-112   -208   
-16    304    
-416   -64    
96     -80    
-368   -512   
16     16     
-144   288    
-1472  -560   
416    -144   
0      304    
-224   320    
-32    -480   
96     128    
-144   32     
-16    -32    
-80    64     
80     -80    
-480   112    
512    128    
-400   16     
-112   -64    
80     96     
-288   0      
160    608    
64     32     
-160   -368   
32     -272   
0      368    
-128   304    
80     -176   
-112   -176   
-32    0      
144    -176   
-304   -240   
96     496    
-288   -592   
0      -352   
224    768    
-288   96     
288    -272   
0      144    
-96    -48    
64     32     
-256   496    
80     -544   
-208   -752   
464    272    
0      1120   
-416   240    
176    -688   
-320   -160   
0      48     
-240   -64    
112    160    
-592   -96    
16     48     
80     80     
32     80     
48     48     
0      80     
0      32     
-32    32     
-224   224    
448    160    
96     384    
-288   80     
64     -144   
-96    -32    
48     192    
-416   144    
-80    -144   
144    144    
-192   -288   
64     -208   
160    272    
-192   128    
64     144    
-64    -192   
32     -32    
64     272    
-304   -224   
32     -144   
144    128    
-192   320    
-96    -32    
64     224    
32     -48    
-224   -384   
0      -272   
32     -144   
32     80     
112    416    
16     672    
-112   -320   
176    16     
-384   -352   
-48    -416   
-144   -352   
128    -112   
-48    96     
176    -32    
0      32     
112    -96    
208    0      
-128   128    
-176   -656   
-192   -496   
240    -64    
-208   -144   
144    -128   
16     16     
48     256    
224    176    
-160   0      
192    96     
112    192    
48     80     
176    0      
32     64     
32     -16    
-80    96     
-16    32     
96     80     
-112   32     
32     -64    
-192   32     
192    384    
-272   -160   
144    112    
32     112    
-48    64     
128    112    
-48    208    
80     32     
144    160    
240    192    
-144   -192   
0      160    
0      48     
-16    16     
-32    64     
128    160    
-144   208    
112    96     
-224   48     
160    80     
-144   80     
32     48     
96     144    
-112   32     
96     48     
16     64     
80     48     
32     160    
64     48     
-448   -192   
736    -128   
128    192    
-128   0      
16     128    
304    256    
-160   0      
32     128    
16     -16    
-64    -48    
128    176    
64     192    
-160   80     
-288   -144   
32     -32    
-64    -48    
80     -224   
-80    -192   
224    160    
144    256    
64     144    
32     80     
-176   -80    
224    192    
-80    -16    
48     32     
32     -16    
-192   64     
192    48     
48     32     
-256   -144   
16     -608   
-80    -144   
160    -2592  
-112   80     
144    32     
176    144    
48     144    
-64    48     
160    0      
-32    144    
48     64     
16     96     
176    32     
96     48     
-192   -80    
304    -32    
112    160    
-48    -240   
16     -80    
448    -48    
-192   192    
176    64     
80     64     
48     112    
192    128    
-80    -32    
64     16     
-32    -16    
432    192    
0      -16    
64     -192   
64     144    
48     -336   
-48    -160   
-128   -880   
112    -144   
48     48     
272    144    
-32    0      
144    144    
-16    -64    
48     176    
144    -16    
-176   -48    
32     -16    
-32    -96    
32     144    
80     -64    
-16    240    
208    -528   
-192   -16    
208    64     
64     112    
-192   -16    
192    224    
-80    48     
32     80     
80     112    
-48    16     
96     96     
48     -16    
112    16     
128    -80    
160    64     
160    32     
0      160    
-224   -416   
160    -304   
-16    -96    
224    128    
-112   80     
64     64     
16     -16    
112    32     
160    -32    
-208   160    
240    160    
-144   -160   
-16    -128   
112    -96    
16     80     
0      -304   
80     304    
96     208    
-32    336    
128    144    
160    256    
64     96     
80     -144   
16     -128   
-32    32     
416    288    
96     0      
-80    176    
-80    -288   
112    160    
-96    -976   
-16    -144   
32     -96    
48     -32    
-32    0      
96     16     
64     0      
-16    -96    
128    -64    
16     64     
240    208    
-48    -128   
-48    -416   
-144   -336   
80     96     
32     128    
80     -720   
-128   -128   
144    -336   
160    288    
208    176    
-32    -352   
0      -304   
192    -80    
-160   -32    
320    -1648  
-32    -192   
-16    32     
176    16     
240    0      
-128   -432   
-32    16     
128    -224   
64     -672   
112    32     
-304   208    
0      -64    
112    -240   
128    48     
-256   -368   
416    -416   
48     272    
-48    -48    
48     -80    
144    -624   
48     16     
-112   -384   
32     336    
368    480    
-16    544    
96     320    
-432   -240   
208    -560   
208    96     
32     176    
48     -192   
80     -48    
-256   -1152  
336    -416   
-48    144    
48     32     
-48    -176   
-48    192    
-176   0      
-224   -400   
-48    -176   
-112   304    
-592   240    
208    112    
-96    -304   
32     -544   
176    432    
-16    144    
-272   -336   
0      160    
320    256    
-240   80     
112    48     
-224   -112   
-80    -224   
-352   -656   
-160   -208   
-192   -96    
160    80     
176    160    
160    -144   
48     -96    
192    -112   
16     128    
160    48     
96     304    
528    608    
-288   -32    
16     144    
400    -80    
-416   32     
-80    -160   
-80    -64    
256    192    
-336   -432   
0      -64    
112    -32    
-64    -144   
0      16     
288    -688   
96     240    
-320   -464   
400    -512   
-16    176    
-128   416    
-224   288    
-288   -80    
128    -544   
-112   256    
-608   16     
208    -384   
-208   144    
240    -656   
-288   -128   
128    -800   
-320   -752   
608    176    
-208   432    
144    -32    
256    352    
-400   672    
-48    128    
-112   -384   
-192   -224   
-48    240    
144    32     
48     112    
240    -192   
-224   -224   
304    -272   
-288   384    
64     -64    
-64    480    
288    -128   
-288   -32    
16     -16    
-112   -624   
-176   368    
304    -496   
-128   16     
192    48     
-544   240    
240    336    
-144   32     
48     -320   
-64    320    
-48    80     
144    -112   
-16    -16    
64     -112   
-304   -160   
336    -592   
-192   256    
224    96     
-224   -432   
-896   -96    
0      272    
16     -208   
-48    272    
80     32     
-288   176    
-64    48     
-320   0      
-112   16     
-240   16     
-32    16     
-48    -80    
96     48     
-80    16     
-16    368    
-176   128    
0      64     
64     -160   
-112   -64    
112    16     
-304   -160   
32     -128   
-160   0      
80     112    
-608   -32    
-112   64     
-1584  -64    
-96    64     
336    368    
-336   112    
-224   -48    
288    96     
-16    -96    
0      16     
-96    16     
80     48     
-80    16     
-176   -64    
96     128    
-272   64     
-48    192    
-240   32     
192    128    
-720   128    
-48    96     
80     -176   
-32    192    
-16    -64    
-16    96     
-96    -128   
192    64     
-128   48     
-128   64     
32     -16    
112    32     
-96    16     
-64    224    
352    -48    
-576   64     
-96    64     
-208   -192   
48     128    
112    112    
-160   128    
0      128    
-128   96     
272    304    
-528   96     
112    0      
-224   -80    
64     -64    
48     48     
-128   144    
-48    0      
-48    32     
144    16     
48     80     
-64    -16    
64     -144   
-32    -96    
-96    -16    
128    208    
96     16     
-48    80     
-256   -112   
-32    -128   
0      -64    
0      0      
48     64     
-240   80     
-1568  -128   
-16    16     
0      48     
-48    -192   
256    -208   
-64    -240   
128    -240   
-32    -176   
-112   -160   
-96    -176   
-240   16     
240    80     
-80    112    
-80    -48    
48     16     
-256   16     
16     32     
0      64     
208    240    
-320   80     
-16    176    
0      144    
-144   16     
64     256    
-208   48     
-144   32     
-144   48     
0      128    
-160   -80    
-16    -144   
-400   -16    
-48    0      
-176   64     
-80    160    
-480   48     
144    416    
96     336    
-64    256    
64     48     
-288   80     
224    96     
-192   -32    
64     176    
32     -96    
160    224    
-240   16     
112    32     
48     160    
208    128    
-48    112    
96     32     
-80    -128   
16     32     
224    144    
-352   160    
0      144    
-384   -96    
352    192    
112    128    
-208   64     
-80    112    
-80    48     
-32    80     
-224   -176   
128    48     
176    256    
-304   96     
64     192    
144    -16    
-112   -16    
32     80     
48     80     
-32    112    
0      16     
-16    0      
80     80     
-96    0      
-64    -80    
80     32     
0      96     
-96    64     
-32    48     
0      112    
208    112    
-240   -16    
48     80     
-16    16     
48     48     
-272   -80    
-16    64     
48     48     
80     80     
80     128    
48     160    
96     48     
-80    80     
32     144    
-80    0      
-16    80     
32     96     
0      96     
-16    48     
80     0      
96     0      
32     32     
0      112    
-16    160    
48     80     
16     384    
0      112    
96     384    
224    128    
-176   -16    
192    -80    
16     -144   
0      96     
208    80     
-64    -16    
112    48     
-48    96     
48     64     
-16    -96    
-112   -128   
208    544    
512    560    
-208   240    
336    240    
-304   0      
96     272    
-80    112    
96     144    
0      -128   
-48    -192   
0      -256   
96     -1344  
-128   128    
80     -48    
224    160    
-64    608    
224    -80    
32     208    
-64    192    
16     176    
48     48     
-96    -176   
272    -608   
0      704    
0      -368   
112    96     
48     -288   
112    -80    
32     -160   
160    80     
-32    192    
160    -384   
-32    -704   
384    624    
96     992    
48     368    
-64    -240   
48     0      
144    144    
-32    -80    
80     0      
-16    -336   
224    224    
-112   -1024  
-64    -80    
16     0      
64     64     
-32    -176   
160    96     
-64    80     
304    272    
-112   304    
-32    -48    
160    288    
0      32     
32     192    
96     -48    
-160   96     
96     304    
384    448    
-96    240    
176    176    
-992   -784   
96     -1152  
-112   -336   
-48    -80    
112    -112   
96     80     
-32    352    
352    304    
-32    160    
-96    -64    
240    -64    
0      -416   
32     -128   
-224   -400   
32     48     
16     144    
-48    -80    
-304   -256   
368    -48    
-192   336    
-80    320    
176    32     
-192   -976   
96     -416   
-208   -1040  
240    -16    
-32    -320   
-16    256    
-32    64     
-368   -16    
-16    -384   
128    -256   
-112   -112   
448    128    
32     656    
656    224    
-320   480    
48     -352   
-176   -224   
-48    -272   
192    -192   
0      272    
16     384    
-80    -400   
80     128    
-16    144    
-80    -112   
48     96     
-160   -176   
32     -1136  
-144   -480   
368    -240   
-64    96     
160    240    
-48    -208   
224    272    
0      464    
-96    -528   
-240   -96    
192    -656   
352    432    
-192   -48    
-128   -224   
-1136  -384   
288    -1280  
16     224    
144    -192   
80     -384   
112    -928   
272    736    
-144   192    
64     -656   
272    272    
-32    128    
-96    -240   
160    304    
-128   -48    
176    -80    
-304   32     
464    144    
-160   320    
96     336    
144    -16    
32     -192   
160    -16    
-160   64     
-48    -416   
272    -352   
32     -64    
-48    -224   
32     16     
144    -160   
-32    -224   
-112   -32    
-64    -304   
32     112    
96     -96    
-64    48     
176    -464   
32     32     
16     -704   
32     -752   
176    -112   
256    16     
-96    48     
-80    96     
-112   -288   
368    336    
-304   128    
160    272    
-1264  -96    
160    16     
144    -32    
0      -48    
96     -32    
16     224    
-176   0      
32     -144   
288    736    
-32    384    
48     320    
-96    32     
80     0      
-80    16     
80     80     
-384   -16    
32     48     
-48    16     
304    96     
-192   64     
112    -112   
-48    96     
192    -576   
-160   -96    
112    -240   
288    -64    
-32    64     
240    96     
-304   -16    
-80    -144   
208    -64    
-96    96     
-1680  -176   
128    -224   
96     96     
32     64     
32     112    
256    -608   
16     -16    
80     -192   
0      -176   
32     -16    
-64    -96    
48     32     
48     0      
-16    64     
128    -64    
-336   -96    
112    -80    
-240   -16    
-112   -160   
48     96     
48     -800   
-80    64     
32     32     
48     -48    
-32    224    
-48    48     
-192   -32    
176    -48    
-352   -112   
48     16     
-112   48     
192    48     
-144   80     
240    64     
-96    64     
32     -192   
336    96     
-160   32     
160    80     
-192   144    
-16    -32    
272    144    
-144   240    
-80    -32    
176    -240   
-160   -144   
160    -16    
-192   64     
-32    -256   
48     96     
80     -96    
96     -128   
-112   160    
64     -128   
-176   0      
160    80     
-416   80     
160    32     
-192   -48    
80     32     
-160   -48    
-864   -144   
32     128    
-480   -160   
80     80     
-560   -64    
-16    64     
-160   -32    
-128   16     
112    208    
-560   144    
-48    160    
224    288    
112    208    
-48    -80    
48     -80    
112    -304   
-176   336    
96     -16    
-32    48     
-32    128    
-256   -80    
-32    64     
-224   80     
32     112    
-112   -32    
-288   -144   
-736   -96    
-192   288    
48     -128   
-96    80     
-32    -48    
64     96     
32     -64    
32     112    
-48    -48    
208    224    
-240   32     
0      64     
-32    80     
-176   -112   
144    208    
-608   -64    
-288   -48    
96     64     
-384   144    
432    -64    
-224   176    
-144   -240   
-128   0      
80     80     
-256   48     
-16    -32    
-240   224    
352    80     
-416   96     
-368   32     
-96    80     
-256   -64    
-48    -160   
80     160    
-48    -16    
-96    96     
-144   -16    
32     32     
-16    -80    
-144   -48    
256    48     
-224   0      
-32    32     
-32    32     
-112   160    
80     -64    
-80    -16    
-432   -128   
128    48     
-48    -48    
224    144    
-80    80     
64     48     
-48    48     
-112   96     
64     -16    
160    0      
-48    32     
-48    32     
64     48     
-224   32     
-256   -128   
-368   -96    
32     -80    
-560   -336   
-112   -192   
0      48     
-128   16     
-16    96     
192    80     
-176   176    
-16    160    
32     -64    
-32    -96    
48     -64    
-320   -16    
272    304    
128    -32    
16     176    
-224   -48    
48     -160   
-160   112    
16     0      
-32    160    
80     -336   
-240   -448   
304    432    
-64    288    
-304   -112   
48     -592   
-48    304    
0      16     
-32    -128   
128    80     
-400   -32    
48     80     
48     112    
-208   32     
240    96     
-32    32     
32     48     
-80    16     
48     80     
112    704    
-80    128    
-176   -512   
64     608    
-288   -416   
32     80     
112    -112   
48     96     
-48    32     
464    384    
-336   464    
96     -48    
-48    0      
32     96     
80     400    
-32    -272   
-80    -320   
16     -48    
-80    -224   
-64    64     
176    128    
-80    64     
32     -48    
80     -48    
160    48     
64     336    
176    128    
64     240    
0      48     
-176   -480   
-32    -256   
80     272    
-256   0      
-144   -720   
-208   -752   
32     -208   
80     -240   
-32    -400   
80     -16    
128    240    
-32    96     
80     32     
0      112    
80     0      
-48    80     
0      112    
-96    48     
-144   32     
160    96     
-80    -48    
-80    112    
208    80     
-160   416    
128    400    
-176   -48    
0      -128   
-80    64     
112    -32    
-288   -48    
-64    -160   
160    -144   
64     144    
320    368    
-768   -608   
-160   -816   
-48    0      
-176   -128   
-112   64     
160    16     
-32    448    
176    144    
-48    176    
-240   256    
-80    -192   
-176   -320   
128    16     
112    336    
-416   112    
128    32     
96     80     
-448   -416   
400    -240   
-320   752    
240    1216   
64     -240   
-48    -704   
64     0      
32     112    
32     256    
208    336    
-288   -32    
-176   80     
-336   576    
160    -16    
-368   -624   
128    -1728  
-192   64     
-32    -224   
224    368    
-384   -192   
-96    -368   
-64    -144   
384    576    
80     352    
0      -208   
-288   -896   
208    32     
16     192    
144    -208   
80     -400   
-32    -1104  
240    16     
-176   -16    
432    192    
304    96     
-80    64     
-48    0      
48     -464   
-80    -736   
368    128    
-304   -208   
96     96     
-48    368    
32     96     
160    160    
-112   -160   
-32    64     
64     -1904  
-48    80     
112    0      
-32    -32    
224    -48    
0      -32    
-192   -320   
240    -352   
16     16     
128    80     
32     96     
224    -256   
-64    80     
176    -32    
-208   64     
336    80     
-224   48     
0      80     
256    80     
-16    48     
0      0      
80     0      
0      -32    
-160   256    
304    336    
-384   80     
-48    32     
384    96     
-176   32     
-64    16     
80     -768   
208    0      
32     -688   
112    96     
-16    80     
48     112    
208    64     
-176   48     
32     -80    
144    -48    
32     112    
192    -112   
48     48     
-80    -976   
-16    96     
0      -768   
-176   16     
176    96     
-48    80     
-16    16     
176    128    
32     48     
32     96     
80     128    
64     -240   
144    128    
144    -64    
16     112    
112    -240   
-64    208    
112    -80    
16     128    
176    -1072  
-80    -32    
144    80     
0      32     
80     64     
64     160    
16     0      
128    -80    
-16    144    
16     -80    
144    192    
-80    16     
-128   -48    
304    80     
32     96     
0      -80    
-48    176    
0      16     
288    -624   
-224   224    
-1360  0      
48     -512   
160    -192   
-176   -256   
80     -80    
32     144    
16     -64    
64     112    
0      -16    
-16    48     
0      -224   
128    -624   
-16    64     
192    -160   
-176   -64    
-1024  32     
224    0      
-48    -16    
48     32     
112    -32    
112    -96    
-320   -384   
304    -464   
0      -64    
176    -224   
48     112    
112    -96    
0      160    
112    -80    
-32    -48    
32     -16    
-48    16     
160    64     
-128   -80    
-48    32     
288    -432   
-160   -64    
112    -416   
96     64     
-176   112    
256    96     
-176   -144   
-48    -64    
272    -240   
112    0      
-288   0      
64     16     
-208   0      
48     -288   
32     -32    
176    -528   
-288   48     
272    80     
-240   48     
112    -400   
-64    64     
-96    -64    
112    144    
-176   48     
96     16     
48     80     
-144   -80    
-1104  -16    
80     -208   
240    16     
48     80     
64     -16    
-80    -144   
128    -16    
32     -1008  
-256   -240   
368    -32    
-16    288    
16     -32    
80     0      
48     112    
-16    -128   
-64    -16    
64     -32    
-208   32     
48     -80    
-48    -176   
-160   -400   
-16    -16    
80     -208   
-48    64     
48     208    
96     -16    
-96    16     
32     -96    
-16    -48    
64     -16    
-416   -48    
112    -48    
-240   16     
48     -160   
-1040  -128   
368    -192   
-240   -48    
128    -192   
192    176    
-272   32     
304    -176   
-224   32     
-64    16     
-32    48     
-112   -64    
-32    128    
32     -128   
-416   32     
336    -304   
-336   0      
368    -48    
48     -80    
-96    -432   
160    48     
64     112    
96     144    
32     224    
160    80     
-48    -144   
16     -176   
48     -32    
128    -128   
32     64     
128    48     
-160   -160   
64     0      
112    96     
-176   -48    
192    -112   
-80    144    
272    128    
-80    -16    
240    176    
-160   96     
112    304    
-16    48     
-96    -96    
-32    -464   
-64    0      
240    224    
-1040  -16    
112    432    
-464   -96    
112    64     
176    -352   
-160   80     
16     304    
16     48     
64     -16    
32     304    
-96    -80    
48     112    
-16    -128   
-496   -160   
496    144    
-336   -208   
384    -80    
-240   -176   
80     368    
-144   -368   
-304   192    
-64    0      
-224   16     
96     528    
-400   -144   
-96    48     
160    64     
-240   -64    
0      64     
-96    416    
-16    -64    
-48    208    
96     -48    
-96    -16    
-96    48     
-144   0      
-32    16     
-208   64     
32     64     
-640   -64    
-48    -16    
-1728  -112   
-16    64     
-240   -416   
160    -192   
128    128    
-208   0      
32     64     
128    16     
-16    112    
32     0      
-16    0      
112    80     
-128   144    
-144   128    
-96    64     
-560   128    
48     16     
-336   -112   
272    -32    
-144   -176   
16     -16    
-128   48     
-64    0      
-32    -128   
-96    -96    
-48    80     
80     -32    
0      192    
240    64     
64     48     
-176   48     
-16    16     
160    -16    
144    64     
-112   32     
-96    -448   
-336   -592   
176    16     
-320   -16    
-176   -448   
-80    -32    
-64    80     
0      -32    
-48    64     
32     48     
-464   -48    
48     16     
-1952  -96    
48     48     
144    80     
-16    16     
-32    112    
80     48     
-272   -288   
272    -192   
160    288    
208    944    
64     496    
-224   0      
144    96     
-304   -160   
48     288    
-144   400    
128    144    
-320   -16    
-720   -1360  
352    -320   
-128   1072   
16     160    
16     -224   
-48    -64    
-112   -208   
32     16     
224    288    
-112   624    
-80    592    
-48    192    
-480   -160   
-176   -16    
80     32     
-288   -320   
80     160    
48     320    
-208   -128   
32     0      
-64    128    
96     400    
-16    304    
160    288    
-32    208    
-240   -32    
80     48     
16     -128   
96     80     
-144   -176   
0      480    
208    432    
-288   -32    
32     -32    
-144   -80    
-64    -400   
176    -176   
16     -32    
-112   -112   
240    -128   
-224   -96    
48     -336   
-208   32     
128    16     
-176   32     
80     80     
320    336    
-432   32     
208    288    
240    176    
-256   224    
528    -128   
-80    32     
48     0      
96     320    
-448   -240   
144    192    
-160   128    
144    32     
-96    -160   
-128   96     
144    240    
-240   80     
-48    -48    
48     16     
-16    0      
64     64     
48     128    
-160   112    
192    192    
-128   192    
-256   160    
-48    128    
64     16     
-48    80     
-288   16     
112    0      
64     0      
-64    64     
-160   -96    
240    -64    
0      112    
144    96     
64     112    
-32    112    
160    224    
-64    112    
-32    48     
128    144    
-128   48     
128    48     
48     48     
-48    48     
16     -16    
-32    0      
416    240    
-288   144    
-32    16     
-96    0      
32     96     
-128   16     
32     128    
192    112    
96     80     
-16    80     
112    96     
0      96     
-128   80     
80     128    
0      128    
-192   48     
80     -32    
80     160    
96     0      
64     -192   
64     0      
-112   -640   
96     192    
-80    32     
0      128    
112    32     
-16    128    
160    128    
32     80     
144    -224   
32     32     
160    64     
-96    80     
80     64     
240    -48    
176    112    
-208   16     
16     96     
272    96     
-320   240    
144    80     
0      144    
112    16     
-192   32     
208    0      
32     48     
-176   -32    
240    208    
-256   64     
288    -16    
-144   208    
-64    -224   
16     80     
128    -512   
-32    48     
32     0      
64     144    
0      144    
0      192    
-176   -224   
176    -80    
160    48     
16     160    
16     32     
128    -48    
48     32     
-64    -640   
96     80     
48     -208   
-80    96     
224    -528   
32     112    
128    112    
-64    48     
176    80     
0      144    
-16    0      
-48    112    
160    80     
64     -64    
-32    48     
32     32     
32     96     
-16    48     
96     0      
-96    -32    
96     112    
64     -32    
80     -48    
96     80     
-16    64     
48     96     
-128   -240   
240    32     
208    96     
-64    96     
48     -80    
-16    64     
48     -384   
16     -48    
48     -592   
0      64     
-144   64     
208    128    
-112   112    
112    96     
-16    32     
-64    -512   
160    80     
-112   -80    
112    64     
-96    -256   
128    0      
48     -64    
96     64     
32     -48    
80     64     
64     112    
176    112    
-128   -160   
64     96     
32     160    
-80    -48    
288    112    
-64    -208   
128    96     
-32    -96    
192    144    
-128   96     
80     -16    
64     -240   
-112   -80    
-160   -256   
96     -704   
-16    -64    
-752   -640   
80     -496   
320    144    
-96    -208   
352    0      
-432   16     
192    -48    
-128   32     
144    0      
16     0      
80     0      
64     -176   
80     176    
160    -48    
-80    -144   
-32    48     
-80    0      
-128   -288   
-128   -416   
128    -320   
448    -672   
80     -32    
288    128    
16     -192   
368    -272   
-112   208    
-16    -320   
-336   0      
336    -160   
160    -416   
-384   -288   
-16    -224   
128    0      
-432   -16    
208    240    
192    48     
-160   560    
96     -1680  
48     -80    
0      -96    
144    96     
112    48     
-32    -32    
160    -240   
64     -144   
-224   -192   
160    240    
-1200  -16    
32     32     
96     112    
80     -480   
-96    -96    
112    -832   
64     128    
80     -48    
48     144    
128    -16    
0      48     
-128   0      
80     -16    
-48    0      
64     96     
-512   16     
352    -624   
160    304    
336    528    
-448   -432   
144    -288   
96     96     
32     -80    
-16    -160   
-48    -144   
128    256    
-64    0      
0      -256   
-48    -288   
0      -336   
32     592    
-32    208    
-128   -32    
80     0      
16     48     
80     80     
16     384    
-96    -1440  
-16    -576   
-16    -144   
224    -64    
-96    -16    
256    48     
-96    -48    
-80    -32    
80     32     
-64    -80    
-336   -16    
192    -48    
-928   -32    
0      -256   
48     32     
96     -480   
16     80     
-64    -224   
528    320    
-448   176    
16     -272   
-352   -464   
0      -304   
32     -112   
-48    32     
80     -48    
-64    80     
-16    -112   
176    -304   
64     160    
320    16     
-128   112    
-64    -160   
112    -80    
-208   0      
256    16     
-128   128    
64     80     
176    16     
-32    -144   
-80    -48    
48     -288   
-240   -544   
32     -560   
64     96     
-160   -192   
0      64     
-272   176    
192    112    
-160   16     
-304   -784   
-64    -1552  
16     -752   
112    -288   
-48    32     
-80    80     
128    -32    
32     208    
-336   -160   
-64    48     
-208   -368   
-480   -32    
112    176    
208    672    
-176   384    
-112   0      
-96    32     
80     -16    
-112   -32    
16     1056   
-96    64     
-448   -752   
96     624    
-128   -48    
48     -272   
64     -128   
-160   304    
-64    128    
-64    -112   
-272   144    
-576   672    
80     -416   
-720   -304   
224    368    
0      288    
-128   -48    
96     -304   
64     -176   
-128   -144   
96     256    
96     144    
-32    32     
64     800    
80     384    
-112   48     
-48    208    
128    256    
-240   48     
0      0      
-752   144    
-176   64     
-16    96     
80     176    
-16    -192   
160    80     
208    384    
-224   208    
-96    128    
128    16     
-16    -64    
304    656    
32     672    
-272   528    
32     32     
-704   -144   
272    224    
-256   -48    
144    160    
-32    112    
-48    48     
-128   -128   
-96    0      
160    96     
-96    32     
-16    48     
-32    80     
112    112    
-448   -64    
-96    -32    
-80    16     
-16    48     
144    -160   
-96    48     
160    112    
-112   -32    
-96    64     
288    16     
512    576    
-960   -96    
160    160    
-176   160    
-112   -192   
-208   -112   
16     -80    
-192   32     
0      48     
-1024  -80    
64     144    
-208   -48    
16     112    
16     176    
-16    -16    
-112   -48    
-48    112    
-16    80     
-272   -16    
160    -112   
-48    32     
224    96     
-128   32     
80     96     
-752   -112   
256    -624   
-64    0      
48     144    
176    64     
-80    96     
240    160    
160    128    
-320   -16    
224    48     
48     96     
-16    48     
32     96     
-112   -48    
192    176    
-480   48     
16     96     
-16    32     
-128   48     
-32    48     
-16    -160   
-160   0      
-16    64     
-32    80     
-16    -32    
112    16     
-160   -16    
160    96     
-64    -384   
-80    64     
48     16     
-336   16     
64     96     
-32    16     
48     160    
16     16     
-32    64     
400    224    
-384   48     
-16    -288   
32     64     
-32    80     
160    256    
0      96     
-96    80     
-48    -16    
16     16     
160    144    
-320   -368   
352    16     
-48    112    
-80    16     
96     48     
-112   -16    
64     80     
0      64     
16     48     
48     352    
-128   -64    
-192   -272   
224    64     
16     32     
-112   -16    
144    -16    
112    192    
0      80     
0      96     
0      64     
64     80     
-112   0      
80     144    
-16    -16    
-16    16     
0      -16    
0      176    
-32    64     
128    48     
-64    -96    
-16    16     
-32    80     
-64    48     
128    96     
-32    16     
32     128    
-32    -64    
0      112    
-32    -16    
96     48     
192    -48    
-112   16     
128    144    
-80    192    
128    64     
-176   64     
128    80     
-160   64     
256    144    
-240   -16    
-32    80     
16     64     
48     64     
128    80     
112    160    
-48    -32    
-48    64     
80     -96    
-16    64     
-32    -128   
32     -80    
16     128    
112    64     
-48    48     
48     -32    
-48    0      
288    48     
352    320    
-496   -16    
32     -336   
-64    -208   
80     -2768  
-208   -528   
0      -144   
192    48     
-112   -208   
0      -176   
64     192    
-176   -176   
272    128    
160    368    
-144   160    
0      144    
16     -32    
-96    -368   
-64    448    
160    -48    
-96    0      
48     64     
288    400    
-96    160    
-16    16     
-112   112    
32     64     
-16    208    
96     144    
-32    128    
-80    -112   
208    224    
48     -464   
16     64     
64     112    
0      128    
432    -1088  
-336   64     
-16    -128   
-64    -368   
64     64     
320    96     
-112   -32    
128    48     
-48    -16    
160    336    
-112   224    
160    432    
96     704    
48     64     
-112   48     
-64    -624   
-64    -32    
-32    368    
224    192    
64     -80    
48     192    
160    128    
16     -96    
96     -144   
-80    -64    
224    96     
-208   336    
208    80     
-48    -320   
-80    160    
96     -240   
-224   528    
-48    -1200  
-144   -480   
80     800    
208    64     
-80    256    
64     -64    
160    192    
-32    96     
-176   -592   
128    -176   
160    608    
0      -480   
-304   -576   
-368   -352   
576    -112   
-240   -544   
-112   288    
-144   -112   
112    16     
-192   32     
128    64     
208    48     
-240   -144   
112    96     
64     -224   
-32    64     
96     -224   
-128   96     
416    160    
-144   336    
256    -240   
-16    240    
-80    176    
208    -128   
-96    64     
416    256    
64     960    
-48    32     
208    272    
-240   -128   
64     -176   
112    -192   
16     -80    
128    112    
64     144    
112    0      
-80    144    
48     -16    
64     -816   
32     176    
-1696  -352   
224    -80    
32     432    
0      208    
64     16     
-64    -496   
288    -288   
-96    64     
48     -224   
160    96     
0      -176   
0      -384   
80     48     
48     -464   
48     80     
-128   16     
80     -144   
-64    -96    
112    -704   
-96    -544   
128    -544   
-112   -944   
352    -32    
176    352    
-128   160    
176    -16    
-32    -176   
-32    -272   
208    -224   
64     272    
16     112    
-112   -416   
304    -112   
-16    832    
32     -688   
0      -272   
128    528    
-112   -224   
176    -256   
-96    -272   
16     -144   
272    -208   
-16    144    
32     48     
96     -208   
-256   96     
128    384    
-320   -528   
-80    -320   
16     -272   
-176   -592   
32     704    
-32    -464   
-240   -400   
144    176    
-272   80     
80     -128   
144    16     
16     176    
-64    48     
-208   -144   
176    -176   
160    800    
-528   -656   
96     -480   
48     -288   
240    208    
-32    -144   
32     32     
-16    -544   
144    480    
432    528    
-400   32     
16     -64    
80     -144   
-16    -144   
304    256    
-48    304    
336    -80    
32     16     
144    320    
256    336    
144    -32    
96     272    
0      -608   
48     128    
48     -32    
16     -112   
0      80     
-32    64     
-16    48     
208    -160   
-336   -48    
240    112    
-80    -64    
-32    0      
-544   320    
-32    112    
96     336    
16     -752   
192    160    
-176   -720   
288    -144   
-32    176    
96     -32    
-192   -48    
64     32     
-208   32     
-16    112    
112    16     
-48    48     
80     496    
112    -48    
96     80     
32     -48    
-48    0      
-208   0      
48     48     
64     128    
-160   48     
-176   48     
0      16     
-16    -112   
96     0      
-48    -80    
-16    -352   
112    32     
-32    -96    
32     -48    
-96    -96    
336    144    
-368   96     
272    208    
-304   96     
80     -96    
-48    112    
0      48     
-16    16     
-256   -144   
80     144    
-368   -224   
-112   64     
-80    -144   
-32    192    
-416   -160   
-624   -192   
144    -80    
-944   -320   
-48    -32    
-256   -64    
-240   -48    
48     -48    
-352   0      
64     32     
64     -64    
-624   0      
-64    144    
-160   -128   
16     16     
-432   -464   
96     -160   
-96    112    
-272   -96    
16     16     
-256   -48    
-64    -48    
-784   -16    
-128   48     
96     -32    
-32    80     
-16    -16    
-144   0      
-144   -96    
160    96     
-176   -32    
0      -48    
0      -64    
-48    0      
-32    32     
-48    48     
-64    -80    
-368   112    
304    112    
-176   -16    
-96    32     
-80    -208   
112    48     
-16    16     
-32    128    
160    240    
16     -16    
-112   80     
144    48     
-128   16     
-112   -16    
32     48     
48     0      
176    208    
112    -16    
-288   48     
96     -192   
-112   64     
48     -16    
-144   48     
32     48     
-112   -96    
-48    32     
32     0      
-160   176    
208    448    
48     192    
-96    -112   
32     96     
0      16     
-288   -16    
96     -160   
176    192    
112    -32    
-160   16     
144    16     
-256   192    
-16    64     
-96    16     
80     16     
32     -16    
-32    192    
-128   -48    
-176   48     
-368   -128   
144    160    
-752   -16    
48     80     
128    112    
-208   -16    
-48    48     
112    128    
-96    96     
80     96     
-96    112    
-144   0      
80     32     
32     48     
-32    80     
64     112    
-48    144    
-624   -128   
208    -112   
32     -48    
-64    64     
80     80     
-96    -208   
-144   -16    
176    144    
0      48     
-96    -112   
80     0      
-208   -16    
144    128    
-16    256    
128    224    
-416   -32    
-224   -48    
80     0      
-128   -16    
112    240    
32     0      
112    32     
-192   -48    
-128   80     
32     -656   
-80    -16    
48     208    
-32    64     
-128   48     
112    16     
-288   -96    
48     -80    
-48    672    
192    -288   
224    384    
-304   16     
128    -224   
96     432    
272    240    
-192   64     
-96    -464   
-80    -256   
160    16     
48     -528   
176    32     
80     256    
32     80     
160    96     
-64    176    
-64    -128   
240    320    
-32    16     
-80    16     
64     -400   
64     80     
112    288    
-32    0      
-16    48     
-112   80     
16     -112   
32     80     
-48    -32    
96     176    
240    432    
48     368    
160    -144   
-48    160    
-48    -80    
112    -288   
-32    320    
192    288    
-352   32     
-80    -368   
192    -48    
0      512    
-16    48     
64     96     
0      -32    
-32    208    
-96    496    
64     -256   
-144   144    
160    0      
-16    1504   
-64    -640   
-80    -832   
-224   224    
-192   240    
-16    -416   
-144   -304   
416    -64    
240    -48    
112    704    
16     304    
-144   -208   
-144   272    
-144   272    
128    80     
-448   -336   
464    320    
-272   240    
32     -448   
-224   576    
-144   112    
160    96     
-192   256    
160    -416   
-128   16     
32     -224   
240    16     
-128   224    
96     144    
-304   608    
224    -496   
-336   336    
-256   32     
128    -464   
32     112    
96     96     
48     -304   
16     64     
16     80     
-128   80     
192    80     
0      96     
-32    64     
96     16     
0      464    
-16    64     
0      -272   
416    416    
-16    -384   
0      608    
-16    -176   
96     -592   
-48    256    
144    144    
-96    256    
-32    -176   
16     192    
64     -16    
-112   368    
512    -656   
-48    640    
-32    -224   
144    48     
-176   -16    
208    -384   
208    816    
-48    224    
-192   -448   
256    -960   
-144   0      
112    -192   
-128   640    
320    -432   
16     688    
-112   144    
240    0      
-160   -16    
16     64     
176    64     
-64    -320   
48     112    
0      -208   
96     48     
-16    -736   
0      32     
128    -320   
-128   -432   
224    16     
240    1008   
-32    688    
128    -16    
-144   -48    
-32    -272   
-96    -256   
-64    -512   
288    176    
-144   224    
112    -64    
-48    -272   
16     -224   
80     -768   
16     128    
192    320    
-112   256    
-32    192    
32     -16    
-128   -192   
112    -320   
48     -160   
-32    -192   
48     -128   
32     -32    
16     32     
-16    -384   
96     16     
-112   -496   
64     -784   
-48    -432   
368    -432   
-112   -208   
176    416    
32     144    
96     112    
160    208    
48     -48    
176    160    
-224   -80    
48     -32    
160    -160   
160    240    
-32    -80    
96     16     
16     -96    
80     144    
288    112    
176    144    
112    32     
-48    -64    
368    96     
-320   -160   
160    80     
-80    -48    
96     112    
48     -64    
-80    -80    
512    -96    
-80    32     
272    240    
-176   -720   
32     16     
240    -400   
-80    -1136  
112    -64    
128    -720   
32     32     
240    272    
-64    -176   
0      192    
-16    -304   
144    128    
128    48     
-160   -208   
32     64     
80     -400   
32     -32    
-400   32     
-32    -112   
32     -160   
320    144    
-48    -112   
-32    -720   
192    -112   
-16    160    
48     -144   
16     -176   
80     128    
0      -352   
-320   -240   
432    -368   
-144   -320   
96     -144   
-16    -16    
-32    176    
16     -144   
-96    528    
320    -112   
-16    80     
-240   -1088  
-272   -128   
112    -176   
-32    80     
176    -32    
-64    64     
80     -16    
-176   -176   
-32    -128   
-48    -224   
-624   -384   
192    16     
320    -80    
176    144    
0      -64    
-176   -304   
96     -64    
96     -432   
16     -32    
128    -32    
-128   -96    
-448   -64    
160    -144   
-80    -32    
32     0      
-560   0      
-16    16     
240    -48    
-80    48     
112    48     
320    112    
-368   64     
64     -272   
320    144    
208    -32    
256    112    
-320   48     
80     -80    
-96    -32    
352    128    
-224   32     
0      -80    
-592   96     
80     -160   
-208   -128   
224    -288   
64     -16    
112    -304   
112    112    
160    -16    
16     -240   
-128   -64    
160    -336   
-176   -16    
192    16     
-64    144    
-160   -80    
-384   32     
64     -240   
-176   128    
256    -176   
-160   32     
272    -368   
64     16     
-32    -784   
224    64     
-224   32     
144    32     
-112   128    
128    32     
-368   -64    
80     0      
-336   -32    
176    -32    
160    48     
32     -80    
-16    64     
-80    -176   
144    144    
-192   -64    
16     -160   
-240   128    
224    16     
-240   80     
64     -144   
-16    -80    
32     -144   
96     32     
0      -48    
-32    -32    
112    -224   
-64    224    
96     -240   
16     64     
-208   16     
80     -288   
-128   -96    
368    112    
-304   -64    
16     -32    
48     128    
-32    -48    
-16    -384   
128    -144   
-256   -96    
-944   -32    
-48    -80    
-528   -160   
-304   -256   
96     -144   
-128   -208   
-144   -80    
-560   32     
16     176    
32     -160   
-96    -256   
80     144    
64     336    
-864   -160   
48     320    
32     -240   
0      -208   
-16    80     
-400   -144   
-32    144    
-192   528    
160    272    
-432   160    
-96    -112   
-48    144    
-192   -144   
144    -240   
-240   -432   
176    -80    
80     224    
112    -96    
-160   96     
-16    -336   
48     112    
-192   80     
0      -16    
-48    64     
-160   32     
48     48     
-320   -64    
-144   -96    
272    -192   
240    368    
-224   -224   
48     -352   
-128   -112   
0      336    
-48    -48    
-96    -304   
96     -32    
48     128    
-336   -304   
192    96     
96     384    
-384   -144   
16     -288   
-352   -112   
80     240    
-32    160    
336    224    
-288   320    
320    -112   
-480   -432   
0      -112   
-96    160    
-336   48     
-64    -48    
-256   -128   
96     32     
256    144    
-48    32     
-880   -240   
320    -192   
384    304    
-192   576    
176    -80    
112    192    
-80    80     
-32    -64    
288    -128   
-16    -32    
144    -112   
-80    0      
336    80     
-96    128    
80     -320   
-80    -256   
80     128    
0      144    
64     208    
-96    -128   
304    -96    
48     480    
-256   464    
64     -256   
160    -144   
-112   112    
-64    -80    
-224   -176   
144    -160   
-96    240    
-320   112    
-368   -688   
608    -672   
-144   832    
-320   16     
-368   -464   
144    -144   
64     80     
272    560    
-432   -32    
-128   -1136  
272    160    
0      512    
64     -112   
32     192    
-80    80     
288    480    
-784   -240   
-256   -624   
96     144    
48     448    
-384   384    
48     -336   
-48    -96    
-48    160    
-160   -192   
288    160    
-96    368    
80     112    
-48    192    
128    96     
48     208    
-496   -288   
64     128    
-208   -304   
112    -80    
112    160    
272    96     
-208   352    
80     -288   
0      32     
112    0      
0      -288   
128    128    
0      144    
-144   -224   
144    -64    
96     48     
32     -64    
-16    -352   
-64    448    
0      -144   
-16    160    
128    336    
-144   -240   
144    -48    
48     176    
0      672    
-80    0      
-96    -240   
-208   -672   
272    336    
112    480    
-32    224    
80     -224   
16     -400   
272    496    
16     208    
0      -240   
48     64     
64     320    
-32    416    
80     -208   
-80    -96    
-48    16     
144    -48    
-32    -80    
192    -48    
32     80     
256    96     
80     288    
112    112    
0      -16    
96     80     
112    128    
-288   -48    
-112   -144   
160    80     
128    176    
-224   80     
-96    32     
96     -80    
0      32     
-16    48     
-32    32     
48     0      
96     176    
-80    160    
16     240    
-176   -80    
208    112    
-32    32     
-80    80     
176    96     
0      128    
-48    128    
-80    -224   
-16    112    
176    144    
240    288    
-240   32     
80     96     
128    0      
64     160    
16     32     
0      128    
-80    -48    
80     64     
-96    176    
-272   48     
240    48     
64     -1808  
-80    80     
224    112    
-48    96     
96     96     
16     -80    
240    -64    
-208   160    
224    64     
112    96     
-16    -32    
128    112    
-80    0      
112    48     
-32    64     
112    -288   
176    -48    
0      112    
480    32     
-448   80     
272    192    
-336   96     
240    32     
-48    80     
272    336    
-400   48     
64     -144   
-32    48     
32     -16    
-112   64     
112    -624   
-80    112    
0      -2160  
-48    288    
144    96     
-16    80     
256    48     
-144   160    
-16    -176   
112    16     
-144   112    
400    192    
-96    32     
0      -272   
-64    64     
176    -192   
0      96     
-48    -32    
288    -112   
272    112    
128    80     
-32    -128   
80     32     
80     144    
-48    192    
0      64     
-16    0      
-80    -144   
544    -80    
-80    96     
176    -160   
0      -176   
144    -64    
48     32     
-160   -1856  
80     80     
-80    -224   
192    32     
112    176    
-64    128    
-96    0      
32     -32    
80     80     
32     32     
48     -320   
128    -160   
-160   -64    
-144   -336   
256    240    
-64    -240   
112    80     
432    320    
-400   96     
176    0      
-160   0      
-16    16     
48     -208   
-240   64     
288    -144   
-224   96     
16     -160   
-48    48     
-96    -240   
320    112    
64     -1168  
176    64     
32     16     
-64    64     
48     16     
-80    144    
112    80     
112    -16    
-16    16     
96     -368   
96     112    
192    -128   
0      32     
304    48     
64     96     
-16    -816   
192    240    
-240   48     
112    -48    
-160   144    
32     -400   
48     -80    
112    -192   
-32    -144   
-16    -80    
0      48     
64     -64    
288    208    
-16    -16    
-144   160    
32     -336   
96     -896   
-32    -16    
128    -144   
-80    64     
-688   -96    
64     -256   
96     0      
80     64     
-32    384    
80     32     
48     -96    
-32    80     
96     -160   
32     48     
432    544    
-64    256    
32     -48    
80     -64    
48     192    
16     144    
64     -320   
32     352    
128    -48    
96     64     
16     80     
80     16     
144    -192   
-128   -64    
0      -288   
0      80     
80     64     
-96    32     
48     -80    
32     -80    
-16    0      
80     -32    
-912   -320   
176    -176   
-96    208    
-96    -256   
16     -592   
128    -272   
192    864    
48     96     
-272   32     
64     -160   
64     192    
-176   -32    
48     112    
144    96     
-32    0      
-160   -192   
80     176    
16     32     
32     -112   
32     -160   
160    144    
-16    -128   
16     -1408  
160    256    
-80    240    
16     32     
-48    240    
-112   -112   
-64    48     
16     -80    
-176   -192   
128    -32    
-736   272    
48     -48    
-160   -128   
240    128    
-144   416    
-48    -80    
64     48     
32     144    
80     32     
-176   -32    
112    -160   
-256   -112   
160    -48    
-96    32     
112    -16    
-416   -16    
32     -48    
160    -48    
80     -288   
-16    48     
32     -192   
16     96     
368    64     
160    464    
-80    240    
80     -192   
-64    -144   
96     32     
-96    -32    
0      -80    
-736   -416   
224    -656   
-32    -208   
32     -416   
368    -192   
160    -80    
144    192    
-16    -368   
32     128    
432    64     
-448   -128   
320    16     
256    80     
-112   336    
304    0      
-96    32     
368    -64    
-256   -208   
240    -240   
288    -240   
352    -416   
-240   -352   
-496   -192   
224    320    
64     512    
-32    528    
-144   48     
48     96     
-16    128    
-256   -96    
-272   -224   
-96    -112   
32     0      
-688   -400   
128    64     
-1328  -16    
-224   -240   
16     -432   
0      528    
-400   -400   
272    -176   
-192   256    
112    1056   
-16    112    
-240   -224   
112    96     
-528   -128   
256    -432   
96     -304   
-208   208    
-64    0      
-64    -96    
-336   16     
-320   160    
-176   -224   
-368   -48    
160    272    
-1120  112    
160    976    
192    -256   
-480   16     
-272   144    
64     0      
-640   -960   
16     -336   
-144   192    
-64    256    
-80    -208   
-144   -192   
-48    64     
-192   512    
112    320    
-688   -240   
-112   -256   
-1424  -96    
-112   80     
-16    -176   
288    -64    
-16    -64    
96     0      
32     -176   
-32    -224   
-160   -96    
112    -96    
0      -80    
-16    -160   
96     48     
-112   -176   
0      -240   
-160   -128   
128    -176   
64     -32    
16     -224   
-112   -176   
304    160    
-176   -16    
16     -32    
256    192    
-64    208    
-96    -48    
-128   16     
112    -64    
-256   -272   
-32    0      
-496   48     
16     160    
-1072  -16    
48     176    
-112   112    
-144   112    
-240   -272   
-64    -224   
176    208    
-80    -16    
-112   64     
-16    -48    
-32    32     
-64    48     
128    160    
-176   -160   
64     16     
-1056  -80    
-176   64     
160    48     
-176   384    
208    176    
-32    64     
-80    192    
-80    144    
-128   32     
80     80     
-48    -96    
240    112    
-112   144    
-32    -48    
80     464    
-288   208    
-368   -256   
464    -144   
48     192    
-208   192    
32     -144   
176    -16    
-48    64     
64     80     
-16    32     
-16    128    
-112   -32    
32     64     
-64    -16    
0      144    
-32    -80    
-96    16     
48     -16    
-80    -32    
64     48     
-48    -64    
-48    16     
64     96     
-160   -32    
-128   16     
32     48     
-144   80     
16     32     
-192   0      
160    96     
-144   -64    
16     32     
384    304    
-336   -16    
224    0      
32     80     
-80    128    
80     64     
-224   -32    
256    112    
-112   32     
-192   32     
272    128    
-128   32     
-112   48     
128    256    
272    144    
-96    160    
-16    32     
64     48     
-64    -16    
80     16     
-48    -96    
32     16     
-96    0      
48     144    
-32    80     
64     112    
-112   0      
-32    32     
240    256    
-64    64     
-224   32     
208    -32    
64     160    
-160   0      
48     0      
48     -80    
128    48     
-96    -48    
48     16     
-80    -48    
32     240    
-160   64     
208    -112   
-48    32     
304    96     
-96    48     
32     -80    
256    -64    
-64    176    
144    96     
-176   32     
176    32     
96     304    
-32    0      
-48    -80    
240    112    
-144   -16    
224    80     
48     112    
96     0      
-128   -32    
-128   64     
176    32     
-16    272    
96     0      
-128   80     
-64    224    
160    -144   
0      -48    
96     48     
-64    224    
192    48     
64     176    
-112   48     
-16    16     
-48    64     
96     64     
-32    48     
48     16     
-32    128    
224    0      
32     -16    
16     128    
224    96     
16     -112   
64     176    
64     64     
-80    -784   
208    48     
-32    224    
128    -48    
-256   128    
208    96     
80     128    
48     128    
0      64     
-80    224    
80     -96    
16     -16    
0      -32    
32     48     
192    320    
128    -80    
-160   16     
64     0      
160    128    
-128   128    
128    48     
-144   80     
32     144    
-112   80     
16     16     
-176   80     
-160   416    
96     -96    
-112   -224   
128    192    
-80    -240   
-128   96     
112    -1104  
-256   48     
32     80     
-64    96     
64     144    
48     0      
-32    64     
16     0      
-144   -96    
48     -32    
-112   96     
48     -64    
160    48     
112    -112   
288    144    
-80    -1552  
48     -80    
-128   -464   
-96    64     
80     -208   
96     -144   
-16    176    
128    -32    
80     352    
64     -128   
112    -160   
64     368    
48     288    
96     336    
-160   32     
496    -768   
-224   80     
224    -288   
16     176    
192    -96    
-160   32     
160    64     
64     128    
112    96     
-144   -160   
16     144    
160    -80    
-64    48     
112    0      
32     112    
-48    -176   
0      -432   
96     -400   
320    384    
-448   80     
96     -320   
96     -64    
-32    336    
224    128    
-240   -240   
160    -208   
32     -240   
-48    -208   
208    -96    
-224   176    
192    288    
-32    304    
-48    32     
224    144    
-48    -16    
96     96     
64     96     
80     80     
32     16     
-64    -16    
-48    288    
80     -144   
-96    -64    
-16    -80    
32     80     
16     -304   
0      144    
80     16     
368    464    
0      -16    
32     -592   
-128   64     
112    -560   
176    -832   
-64    -64    
16     -1776  
176    -144   
-128   176    
224    -176   
-32    336    
192    -32    
96     112    
-48    -144   
16     -528   
-48    16     
48     -704   
80     48     
-512   -64    
240    16     
48     -208   
16     -496   
176    -176   
48     -16    
80     -144   
64     16     
160    80     
96     -176   
-224   -96    
672    -160   
-16    528    
416    -64    
-16    80     
0      -112   
416    -272   
208    240    
96     0      
32     -48    
128    -32    
-160   -80    
352    -1632  
16     288    
0      -16    
64     64     
208    -96    
-224   -352   
-16    368    
624    -128   
-752   -288   
144    -912   
-880   -48    
176    112    
16     160    
208    64     
-48    0      
-16    -1040  
176    48     
-160   0      
-64    -80    
-48    -64    
288    -128   
-288   -224   
64     -64    
48     144    
-128   -176   
0      48     
336    176    
-128   240    
128    208    
64     352    
288    336    
-256   -144   
192    -592   
16     80     
-80    -128   
-80    -304   
32     -336   
112    -224   
-80    -256   
400    -528   
-208   -192   
176    -192   
-864   64     
16     32     
224    208    
144    96     
272    272    
-144   -304   
-48    -208   
32     -352   
160    -176   
160    -80    
160    -160   
32     -112   
192    -96    
-192   -224   
128    -320   
176    304    
-16    144    
416    480    
-176   240    
-144   128    
64     -528   
96     80     
384    128    
-288   144    
0      -80    
176    -16    
-48    -208   
-112   80     
-224   -48    
-96    -32    
-32    -96    
32     -96    
64     -144   
64     -160   
0      -32    
48     -128   
128    -48    
-48    -672   
64     32     
16     32     
16     48     
-64    32     
-112   -32    
-32    -144   
128    -48    
-32    80     
-96    -96    
-320   -48    
-48    -208   
64     96     
96     -128   
-160   64     
-144   -16    
192    144    
-304   -16    
-16    64     
48     32     
-240   -16    
-48    48     
0      0      
-128   -64    
32     -16    
-432   -96    
-64    -192   
-48    144    
-64    -128   
-144   48     
-112   96     
-256   64     
16     -48    
-224   -48    
48     32     
80     0      
0      16     
-112   144    
48     112    
80     -112   
-192   144    
96     -80    
-192   0      
-16    -112   
-80    -144   
176    160    
-496   128    
96     160    
-400   -48    
-48    144    
-656   -48    
-256   0      
208    96     
48     32     
160    -160   
0      288    
-304   -256   
-32    16     
128    -64    
-16    32     
-192   32     
32     -32    
-144   32     
-64    32     
0      0      
-288   -16    
64     112    
-64    0      
-256   32     
-176   -144   
0      0      
-160   -144   
32     48     
16     112    
80     48     
-112   32     
-176   32     
80     0      
-48    -64    
-288   -80    
256    48     
-128   48     
-736   160    
96     112    
-192   -80    
-64    -48    
160    -16    
16     96     
-336   48     
288    -64    
-96    0      
-144   -16    
32     96     
-160   -128   
64     -128   
-64    -96    
-256   -80    
-176   -192   
-16    0      
-160   32     
112    96     
-64    -208   
144    0      
-128   128    
160    320    
-256   176    
-160   32     
80     64     
0      -32    
48     -16    
-208   -32    
160    64     
-240   -48    
224    160    
-768   -176   
-160   -32    
208    -304   
80     128    
-144   32     
96     112    
-64    80     
-32    80     
-32    -16    
-48    -32    
176    32     
-64    176    
-160   0      
-16    96     
192    320    
-176   -112   
208    192    
-80    80     
-112   16     
80     128    
0      48     
-32    96     
-64    0      
-144   -80    
352    -176   
144    80     
0      48     
16     16     
-192   -32    
320    192    
-352   48     
-96    -16    
192    176    
-144   -48    
192    16     
-160   0      
176    64     
-80    32     
64     96     
-144   -16    
320    80     
-400   -32    
64     0      
-144   -32    
240    176    
-304   -112   
-144   -224   
192    -416   
144    48     
192    224    
-128   80     
256    -48    
32     -96    
-48    -48    
128    -32    
96     64     
-64    -48    
64     -16    
48     -16    
176    208    
-240   48     
64     48     
-80    -32    
-304   -128   
256    -176   
208    0      
144    192    
-96    128    
48     48     
-128   192    
256    144    
-224   -32    
-32    -48    
-128   -64    
-32    -176   
-272   -416   
-128   -512   
-80    -16    
-192   -128   
-80    32     
-128   0      
-48    416    
-272   432    
48     -128   
-160   64     
128    32     
-32    96     
48     160    
-64    208    
192    496    
-288   -400   
96     -512   
192    368    
208    -32    
-208   528    
144    -96    
0      112    
160    -112   
-48    80     
-32    400    
16     -352   
80     128    
-32    336    
-176   -112   
80     0      
0      64     
48     64     
16     -64    
-176   -304   
128    -352   
-80    -192   
176    128    
224    -16    
-96    240    
80     -32    
-64    64     
-256   80     
496    176    
-304   0      
-16    80     
112    48     
16     80     
32     80     
-128   48     
176    64     
-32    64     
32     64     
-32    32     
-240   80     
304    -112   
-192   -64    
176    -208   
-128   -160   
0      48     
-64    -2080  
96     -288   
80     -192   
-80    96     
208    -16    
-32    160    
32     80     
32     80     
-128   -352   
-16    -176   
128    -112   
-96    -80    
224    -48    
-192   -128   
64     112    
-32    -336   
-64    48     
112    -48    
-48    80     
208    -64    
48     96     
128    -48    
-48    144    
-16    -64    
208    0      
-32    160    
112    112    
0      688    
0      -16    
96     224    
-112   -192   
-96    -16    
80     144    
0      48     
48     80     
64     -64    
-176   64     
352    224    
-96    480    
-144   48     
144    -64    
64     112    
32     0      
-96    -80    
160    80     
48     -32    
16     -432   
16     -1808  
208    656    
-32    272    
16     -96    
-16    0      
32     -80    
-48    -176   
80     416    
0      -80    
240    768    
-16    736    
352    64     
-320   -80    
-32    -176   
176    96     
-176   -336   
96     464    
96     -128   
256    304    
-48    352    
80     -32    
16     48     
16     32     
176    -32    
112    256    
112    128    
16     208    
272    224    
32     32     
176    448    
144    496    
-176   384    
80     -560   
80     96     
-80    -288   
96     -144   
48     32     
96     224    
-80    0      
96     80     
224    272    
-384   -320   
256    -80    
-32    -48    
-32    80     
160    160    
304    304    
-32    -576   
-192   -160   
192    96     
144    240    
0      80     
0      96     
80     96     
80     -208   
-96    -128   
160    -16    
96     464    
192    112    
-80    -432   
-64    240    
112    96     
-368   -288   
112    96     
128    -16    
-288   160    
224    16     
-368   -1264  
192    -896   
-64    -16    
256    32     
64     -32    
112    96     
-80    -96    
112    160    
-176   -256   
0      -16    
64     -64    
-48    -48    
96     64     
-128   -688   
272    -16    
-880   32     
-16    -96    
176    16     
176    80     
-48    64     
-192   -16    
400    16     
224    32     
-240   16     
80     160    
0      -16    
224    144    
-176   112    
144    -304   
16     112    
-336   -192   
-48    -112   
32     32     
-16    -112   
32     -32    
192    -736   
-96    32     
96     -448   
160    32     
16     -272   
64     48     
112    -96    
64     -80    
272    16     
160    48     
-160   -16    
80     -128   
-480   -48    
176    -304   
-48    -144   
160    -48    
128    -16    
-80    -192   
272    -176   
-16    128    
-64    96     
192    -64    
144    240    
-64    64     
48     16     
-192   -32    
112    48     
0      -48    
64     256    
80     -96    
48     -80    
0      80     
80     -176   
-128   -96    
64     -112   
48     160    
368    -400   
-368   32     
160    48     
-224   -160   
-32    16     
192    -32    
-272   0      
192    128    
-688   -64    
176    -16    
-160   48     
-32    -176   
128    -32    
32     -80    
0      160    
48     16     
80     240    
-288   -96    
32     192    
16     0      
-240   -208   
32     -160   
144    -64    
-1248  -48    
144    -48    
0      -48    
176    64     
-160   64     
0      -208   
160    -16    
48     -1520  
-32    -64    
80     16     
112    48     
-48    32     
96     32     
-144   16     
0      64     
-48    -64    
-64    -48    
-192   0      
224    -176   
-32    64     
128    -272   
80     48     
-96    -224   
208    -144   
48     -32    
-16    -48    
-224   -416   
48     -16    
176    176    
-432   0      
240    96     
-64    -16    
-304   160    
480    -96    
-16    80     
-144   -160   
64     144    
-336   160    
224    -112   
-464   48     
64     -16    
-352   48     
288    -48    
-80    0      
48     -48    
-256   -416   
48     -128   
-576   80     
-80    -208   
192    112    
-448   -176   
-16    64     
-144   352    
-128   80     
-96    -32    
32     -96    
16     -32    
256    128    
-208   -80    
240    -144   
-176   -96    
-208   0      
-32    -144   
-448   80     
112    368    
-544   -192   
-240   -96    
176    416    
-416   80     
-368   -960   
-208   -416   
304    320    
-1616  64     
48     224    
-240   -32    
112    16     
-128   656    
144    448    
-64    -32    
-48    -16    
32     -240   
-272   -288   
-64    48     
-32    -32    
-80    16     
-272   32     
-96    -128   
80     -96    
-80    -144   
176    128    
-64    -16    
-112   -32    
128    240    
-16    -160   
144    -176   
192    -80    
144    64     
272    560    
176    304    
-304   16     
64     32     
-240   48     
64     0      
-16    448    
448    432    
-256   384    
-48    -48    
80     64     
-96    32     
80     48     
64     -32    
-128   48     
-48    288    
-16    592    
-400   96     
-608   -272   
-16    -256   
48     -128   
-112   64     
16     112    
-112   -48    
272    -448   
48     288    
400    -192   
-32    320    
-16    -32    
96     208    
-48    -16    
192    176    
-304   -224   
112    -352   
-80    272    
-80    -112   
-112   64     
-272   -64    
0      80     
-960   32     
64     48     
-16    -64    
48     16     
-48    32     
-128   48     
16     176    
-32    -48    
0      -368   
464    720    
-336   544    
-64    -400   
80     -16    
-64    272    
16     144    
-176   -64    
-64    -64    
-160   -432   
-144   -624   
80     -208   
160    80     
-80    336    
-32    352    
16     16     
-288   -304   
208    -288   
-32    320    
80     208    
-384   -704   
256    -16    
-528   112    
-144   64     
-16    -128   
-32    240    
320    64     
-384   16     
112    48     
-64    0      
128    64     
-112   80     
16     80     
16     32     
-16    64     
-176   -80    
-176   160    
224    208    
-128   224    
-96    -192   
208    -352   
-160   80     
32     128    
-16    -48    
16     48     
64     -128   
-32    -64    
-112   -192   
-16    -160   
112    368    
-128   -304   
208    624    
-48    192    
-16    32     
144    144    
-160   -144   
-144   -352   
112    -32    
-16    80     
144    112    
-112   224    
80     32     
48     112    
-80    80     
112    -16    
144    432    
-48    384    
112    704    
-64    -144   
-112   -288   
176    -432   
64     1136   
48     272    
-128   -464   
64     -16    
-144   32     
0      -16    
80     160    
80     272    
-48    160    
-16    0      
-32    16     
128    272    
-48    64     
112    192    
-32    288    
-128   -16    
160    48     
96     192    
144    480    
-208   64     
208    -224   
-16    48     
-80    112    
96     48     
-64    -192   
16     -32    
64     32     
32     -160   
208    -336   
-176   -480   
-16    -80    
96     -48    
32     160    
-16    160    
-64    112    
-96    112    
208    112    
-160   16     
192    64     
-304   416    
112    -176   
-96    32     
96     -64    
32     112    
128    288    
16     160    
0      96     
336    336    
-320   480    
224    320    
-432   -80    
160    -160   
96     -160   
-80    80     
32     0      
0      -656   
288    288    
0      176    
-320   80     
160    256    
208    144    
-112   -96    
176    -80    
-48    -16    
32     80     
0      64     
128    208    
-128   -64    
-144   208    
288    80     
-224   -336   
32     80     
16     64     
64     64     
112    128    
-208   -80    
128    224    
304    400    
-224   128    
-240   224    
48     96     
-64    64     
224    304    
-272   -256   
80     -16    
-32    -448   
-352   -160   
416    -896   
64     192    
80     176    
176    128    
-96    32     
64     160    
-96    -256   
192    48     
96     16     
128    112    
-16    -16    
48     -192   
0      32     
128    -112   
-128   80     
-16    -336   
-128   -96    
144    32     
-64    144    
-64    256    
-16    -16    
16     -16    
64     112    
-96    -48    
96     16     
144    16     
192    -48    
0      80     
208    128    
240    64     
80     -176   
224    240    
-256   192    
112    112    
144    16     
64     160    
208    -16    
-48    32     
16     -16    
208    208    
-64    64     
-48    48     
256    80     
16     -144   
112    64     
0      -400   
240    224    
112    -48    
-208   -16    
288    80     
240    16     
-240   0      
96     128    
0      48     
-48    -96    
32     32     
144    -48    
-16    -240   
0      -544   
416    464    
-496   -48    
320    32     
-16    32     
64     48     
64     16     
32     64     
-16    0      
-16    112    
112    32     
32     -368   
48     224    
64     -32    
48     32     
-48    -112   
192    -96    
320    64     
-384   -48    
128    -144   
32     -32    
-176   -112   
224    240    
64     64     
48     -704   
80     -2160  
112    -80    
96     160    
160    128    
-16    192    
192    0      
-208   -112   
176    -64    
176    16     
0      -112   
96     320    
-32    128    
208    -496   
-160   144    
-816   -112   
-32    -448   
96     48     
192    -240   
-16    -80    
192    -176   
-80    -48    
-16    32     
160    -80    
64     112    
32     224    
112    144    
32     48     
64     -96    
-80    96     
-16    -96    
-16    -112   
96     96     
112    -16    
-32    -96    
32     -560   
-48    -160   
64     -1360  
96     48     
0      64     
176    64     
-128   -112   
-160   304    
112    64     
-16    -192   
-304   -112   
48     0      
-1248  -144   
320    -64    
560    592    
-608   176    
288    16     
-32    -256   
-64    -32    
208    416    
-448   -96    
48     -64    
192    352    
-112   96     
128    144    
-64    64     
32     -208   
-640   -128   
176    -128   
80     -208   
144    -16    
208    48     
96     -336   
128    0      
48     -528   
32     -48    
128    16     
-112   -32    
160    96     
-80    -208   
-320   -560   
16     -368   
-224   -736   
64     96     
-528   80     
-80    -16    
272    272    
-16    -400   
-96    -80    
320    -112   
-128   80     
48     368    
64     48     
-80    -48    
144    -48    
-160   16     
-128   -432   
-64    -240   
272    288    
-704   272    
-64    -656   
-208   224    
240    288    
-176   -144   
80     -528   
192    304    
-80    -2464  
160    0      
-192   496    
-128   -144   
224    368    
-304   -64    
-160   -256   
16     96     
-128   -112   
192    -16    
64     112    
-144   -608   
-96    752    
16     -752   
-64    -160   
64     -704   
32     -48    
16     16     
16     -16    
32     -160   
64     -192   
48     224    
-96    112    
96     -128   
48     -192   
32     -288   
320    -176   
64     480    
176    -304   
-32    64     
-240   336    
304    -384   
80     160    
-128   -112   
0      0      
192    304    
-432   -608   
48     -320   
224    368    
32     0      
-1568  -256   
80     -496   
112    112    
208    -128   
-240   96     
192    64     
-560   32     
-112   16     
-96    32     
-320   -256   
96     -448   
-208   112    
80     368    
-144   224    
144    -528   
80     448    
-256   304    
-256   -416   
160    -416   
32     -16    
16     400    
-400   -176   
-176   -496   
-272   -208   
144    192    
-688   560    
32     144    
16     -144   
64     32     
-224   128    
240    304    
-96    -64    
-32    176    
-64    -320   
-48    496    
-256   640    
-112   -224   
128    0      
-336   16     
-112   0      
-192   -32    
272    64     
-48    -112   
-32    32     
0      -32    
96     96     
-128   -96    
80     64     
-48    32     
-96    -208   
-144   -208   
272    112    
-352   -368   
128    480    
-208   128    
96     -800   
144    784    
-512   64     
-64    -96    
-64    -96    
48     240    
-48    -256   
144    96     
272    496    
-128   272    
-32    -144   
160    336    
-176   -112   
0      -128   
32     432    
48     320    
-144   -16    
-16    -416   
304    224    
-304   -192   
128    -144   
48     32     
-48    -96    
16     160    
32     80     
-224   48     
144    -480   
-144   -80    
-64    176    
-32    -128   
-160   -368   
48     -288   
-128   368    
32     -192   
-544   -192   
32     16     
112    -144   
-160   112    
-176   304    
384    624    
-112   400    
0      160    
-16    -16    
64     0      
144    -176   
-128   -128   
112    160    
-336   -32    
272    64     
16     96     
96     96     
-96    80     
-16    -96    
48     16     
80     16     
-112   32     
304    256    
-272   256    
-80    80     
-48    48     
-144   -48    
112    -32    
-144   -96    
16     -208   
-64    -64    
48     0      
32     96     
-240   16     
64     224    
96     -64    
-160   128    
96     0      
-176   32     
-80    -80    
96     128    
32     64     
-48    80     
192    256    
-464   160    
-16    -240   
-240   128    
-16    -16    
0      64     
80     112    
0      96     
80     208    
-304   -16    
-160   -112   
192    -320   
-128   -32    
256    272    
-16    32     
-160   -80    
96     32     
16     96     
-96    80     
128    288    
-80    128    
-128   16     
-16    -32    
128    -96    
32     -16    
144    48     
160    272    
-240   -96    
-480   -208   
368    128    
-208   272    
32     320    
-16    208    
32     208    
80     144    
-112   0      
-112   16     
64     16     
-208   16     
80     128    
16     144    
-160   144    
-16    16     
64     -128   
32     64     
-176   -144   
-16    -32    
-16    176    
32     32     
-160   64     
240    304    
16     256    
-160   64     
112    272    
320    128    
-112   96     
144    -48    
32     128    
192    16     
224    176    
272    128    
-144   112    
80     64     
128    32     
-32    -16    
128    80     
48     144    
464    400    
-352   112    
208    64     
-96    128    
-128   64     
-48    80     
144    16     
176    144    
-304   -96    
160    -864   
176    112    
-80    112    
176    16     
0      160    
176    96     
176    32     
-112   64     
-16    32     
32     32     
-64    -16    
80     160    
16     -16    
-48    96     
0      128    
64     -880   
0      80     
32     80     
32     80     
48     0      
-16    32     
144    0      
-208   16     
272    112    
64     144    
0      32     
-16    80     
112    80     
80     96     
48     128    
256    -16    
-208   96     
112    112    
-112   -192   
32     -112   
64     176    
-32    48     
160    80     
-16    96     
64     144    
64     -160   
-128   80     
208    -128   
96     0      
80     128    
-96    -304   
240    160    
-96    528    
144    160    
-112   224    
96     160    
48     16     
16     0      
0      -112   
80     176    
-48    48     
160    128    
-48    16     
32     64     
-256   -288   
144    -224   
144    -16    
-16    -432   
16     112    
96     224    
176    -16    
-304   -96    
0      304    
128    -160   
48     96     
32     -160   
96     64     
-16    -96    
128    -208   
-80    -144   
-16    -96    
224    240    
48     -176   
0      192    
0      -1056  
-48    0      
128    208    
336    304    
-80    144    
80     -256   
-32    -176   
80     208    
272    208    
-208   -96    
16     -64    
64     -496   
-48    112    
144    -528   
256    400    
-272   -864   
160    48     
-336   -480   
368    -400   
64     960    
16     208    
464    176    
-480   -400   
128    -112   
-96    -32    
160    32     
80     -96    
64     144    
-64    -432   
48     -320   
256    336    
-128   384    
80     -368   
288    -128   
-144   560    
144    48     
0      144    
208    64     
32     528    
96     -224   
16     64     
-256   16     
16     -288   
-208   192    
144    -320   
-80    -32    
32     32     
96     0      
64     192    
144    -96    
-48    -48    
368    64     
-256   0      
32     -1312  
-160   -560   
160    16     
-32    16     
80     -48    
352    -448   
80     528    
112    224    
-32    368    
-48    -48    
128    96     
80     -320   
64     -816   
32     -112   
112    -32    
48     -272   
224    64     
-160   -640   
-144   -32    
208    80     
256    32     
0      128    
112    192    
144    -624   
-208   -432   
608    96     
-144   288    
-208   352    
-64    -256   
-32    -624   
400    -208   
-240   336    
160    -560   
128    -80    
-272   -528   
368    -576   
-208   320    
224    80     
-368   -672   
48     448    
96     -48    
-176   16     
48     240    
-64    416    
-544   288    
80     -288   
160    -32    
16     -416   
448    64     
-144   176    
160    -560   
16     304    
-48    -112   
80     -240   
0      496    
48     -160   
160    -16    
-32    272    
128    64     
-608   -32    
0      0      
64     -80    
48     -112   
128    -144   
-176   144    
112    -256   
208    -352   
688    880    
-896   -112   
160    -1216  
288    416    
-144   -48    
320    -416   
-32    352    
112    64     
96     800    
144    96     
16     -560   
-16    576    
528    32     
-512   112    
192    -288   
0      -144   
-32    48     
-48    -16    
-32    -432   
208    144    
-128   -16    
160    272    
-192   0      
112    -96    
32     112    
80     -304   
-176   -128   
96     -16    
384    -16    
-32    -512   
32     16     
32     -1552  
112    64     
-96    32     
64     -64    
-48    16     
64     240    
288    -16    
-352   -112   
-208   160    
48     32     
-784   400    
272    560    
176    528    
-48    64     
192    704    
176    -144   
80     32     
-16    160    
112    80     
-144   64     
48     112    
16     208    
-80    -80    
-128   16     
0      -128   
-176   80     
176    64     
16     112    
64     -256   
0      0      
128    -208   
16     -128   
-192   144    
96     -16    
-128   128    
32     -128   
-240   -96    
208    -96    
16     0      
48     160    
240    144    
-192   -144   
48     112    
-576   -64    
-96    64     
-144   16     
-304   96     
-256   0      
-80    -16    
128    256    
-192   32     
-112   32     
208    48     
-160   80     
240    16     
-64    96     
-1168  -96    
-496   192    
-32    -96    
-240   -96    
240    48     
-80    -32    
-256   -80    
-96    -336   
-144   -192   
-176   -112   
-48    -48    
144    32     
-176   48     
-96    -96    
80     128    
-48    -128   
144    176    
64     -32    
0      -32    
0      -32    
-176   -96    
-112   -80    
32     -32    
-240   -176   
80     96     
0      64     
-1456  0      
-64    -64    
-256   -288   
480    96     
-240   -64    
208    -48    
-64    -128   
48     64     
32     176    
0      0      
80     96     
-192   16     
224    224    
-192   128    
-64    272    
-592   -208   
-256   -96    
-64    480    
256    -32    
-144   -80    
80     -64    
208    192    
-96    80     
144    16     
16     64     
128    -320   
128    -208   
128    -16    
-192   0      
192    -80    
-432   -48    
32     16     
128    16     
64     -80    
-128   -240   
-256   -32    
16     224    
-80    160    
0      256    
208    16     
-32    48     
-144   -144   
-96    64     
-80    32     
128    32     
-256   0      
-384   -96    
-1296  -128   
-32    -48    
-96    -64    
-96    32     
-32    48     
192    -16    
-80    64     
112    32     
-64    32     
-112   32     
-48    48     
-144   80     
144    80     
-192   -64    
80     112    
-304   -192   
160    208    
224    -16    
64     80     
128    80     
-240   32     
96     96     
16     16     
0      80     
288    208    
-160   224    
-160   16     
48     -16    
-256   -64    
272    64     
-336   16     
-48    80     
16     96     
-80    -48    
0      -48    
80     112    
208    128    
-16    96     
-208   48     
32     160    
-16    16     
0      32     
0      16     
-112   -16    
176    144    
-208   -16    
64     0      
160    0      
64     48     
0      64     
-16    16     
-16    64     
64     16     
-16    96     
80     64     
-112   64     
-48    80     
64     -16    
-112   -64    
96     -16    
-80    16     
112    64     
0      80     
48     256    
272    208    
-272   48     
208    80     
-16    -16    
-16    32     
-32    0      
96     48     
-304   -272   
352    16     
-192   144    
240    -16    
-160   -80    
-80    -224   
256    -176   
-128   -288   
80     -48    
32     96     
0      144    
64     112    
-48    -96    
64     144    
96     304    
-160   256    
-48    64     
-96    -80    
-48    0      
48     112    
112    192    
32     240    
16     -160   
48     160    
16     112    
16     -224   
-16    96     
-80    -80    
224    -496   
80     576    
16     -352   
192    464    
160    384    
64     672    
80     -64    
0      -800   
80     144    
0      320    
96     16     
-80    48     
80     224    
-96    144    
64     -48    
-288   -192   
80     160    
32     80     
-64    528    
-16    112    
112    -208   
-32    48     
-32    32     
32     48     
-64    64     
96     48     
48     208    
32     480    
-176   -80    
-64    -16    
112    -144   
16     0      
176    96     
32     224    
-368   0      
432    -288   
32     352    
256    -32    
64     64     
144    192    
192    96     
96     144    
224    64     
-208   -96    
400    160    
-32    -48    
288    176    
-48    64     
-192   96     
192    352    
112    0      
-112   0      
256    48     
64     144    
16     112    
64     -48    
176    -160   
-112   96     
192    160    
144    304    
-240   -240   
-128   240    
160    48     
160    -144   
-80    192    
-96    -336   
-32    272    
-64    -1104  
96     -256   
-128   -256   
-16    -160   
256    -192   
32     112    
-176   96     
384    -160   
-240   -192   
128    -192   
176    384    
208    128    
0      -16    
208    128    
272    0      
-96    -608   
80     -48    
-96    -208   
384    -112   
-48    240    
-80    112    
-208   160    
224    -208   
-176   224    
-192   -96    
288    128    
-176   160    
336    -160   
32     512    
-16    464    
-160   240    
320    -400   
-208   128    
-96    -48    
128    -224   
-96    -96    
80     368    
64     112    
-128   432    
-400   -1136  
432    624    
-176   784    
-128   -656   
64     -112   
32     288    
16     -48    
176    80     
-64    -496   
32     112    
-320   -400   
176    -336   
-160   -112   
-32    560    
